# Supplementary material for: Quantitative profiling of PTM stoichiometry by resolvable mass tags
Source: Royal Society of Chemistry journal article supplement (doi:10.1039/d2cb00179a), 2022-01-01

**Protein maps for all proteins assayed in HNE and DMSO sample using STO-MS**

|                              |             |
|------------------------------|-------------|
| <b>HNE_replicate_1.....</b>  | <b>2</b>    |
| <b>HNE_replicate_2.....</b>  | <b>1325</b> |
| <b>DMSO_replicate_1.....</b> | <b>2536</b> |
| <b>DMSO_replicate_2.....</b> | <b>4114</b> |

P02533

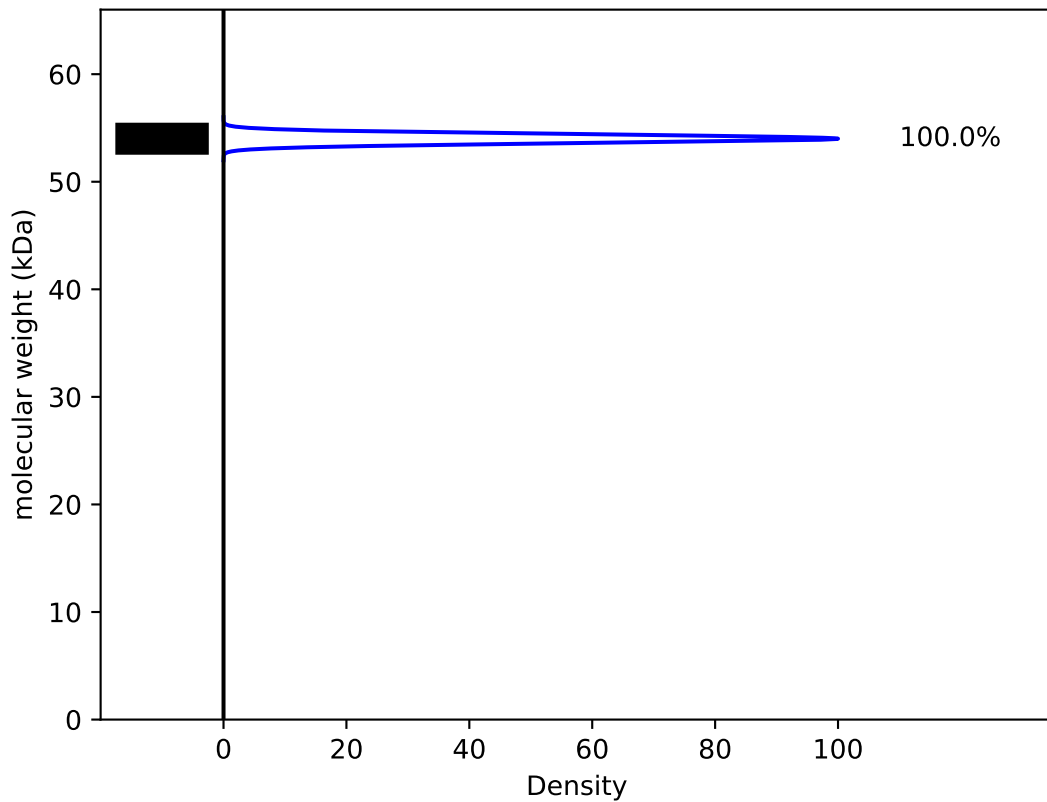

# P35900

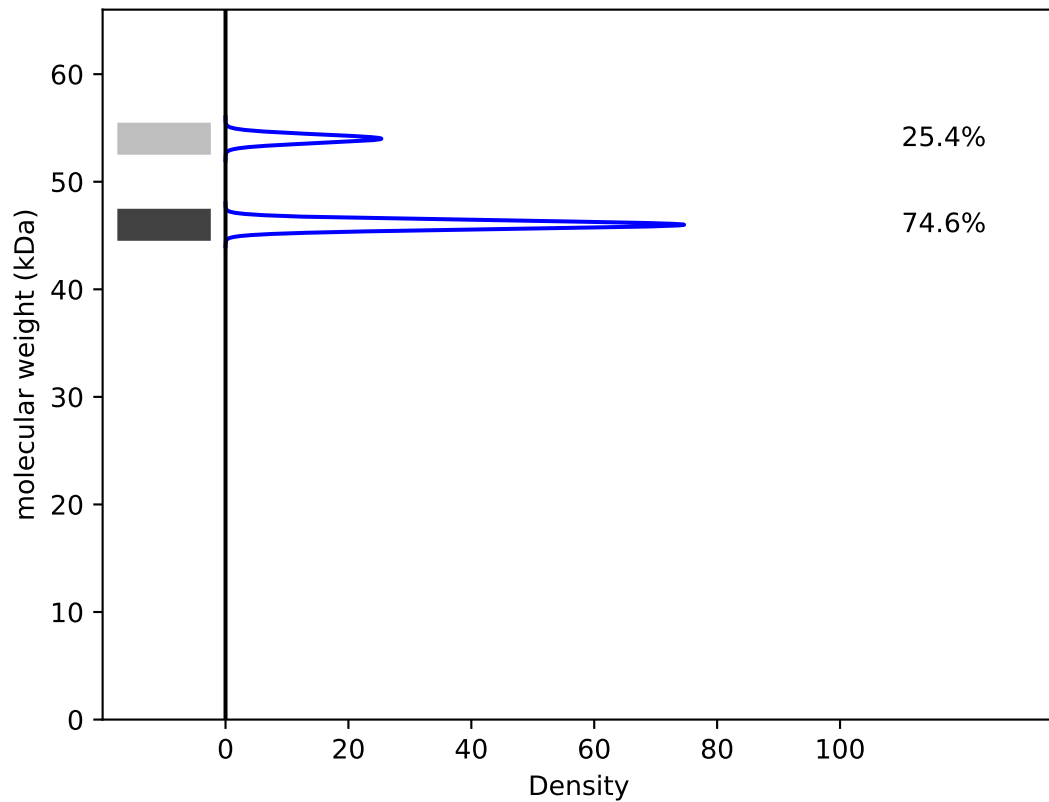

Q99456



Q7Z3Y9

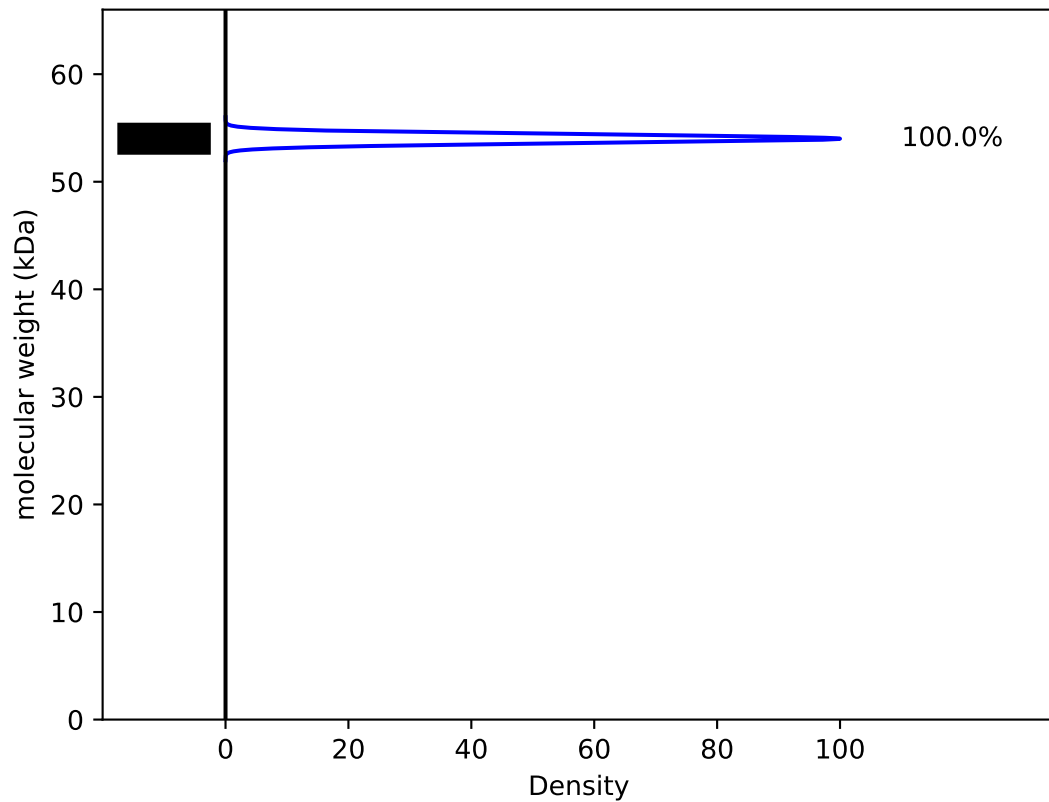

P02649

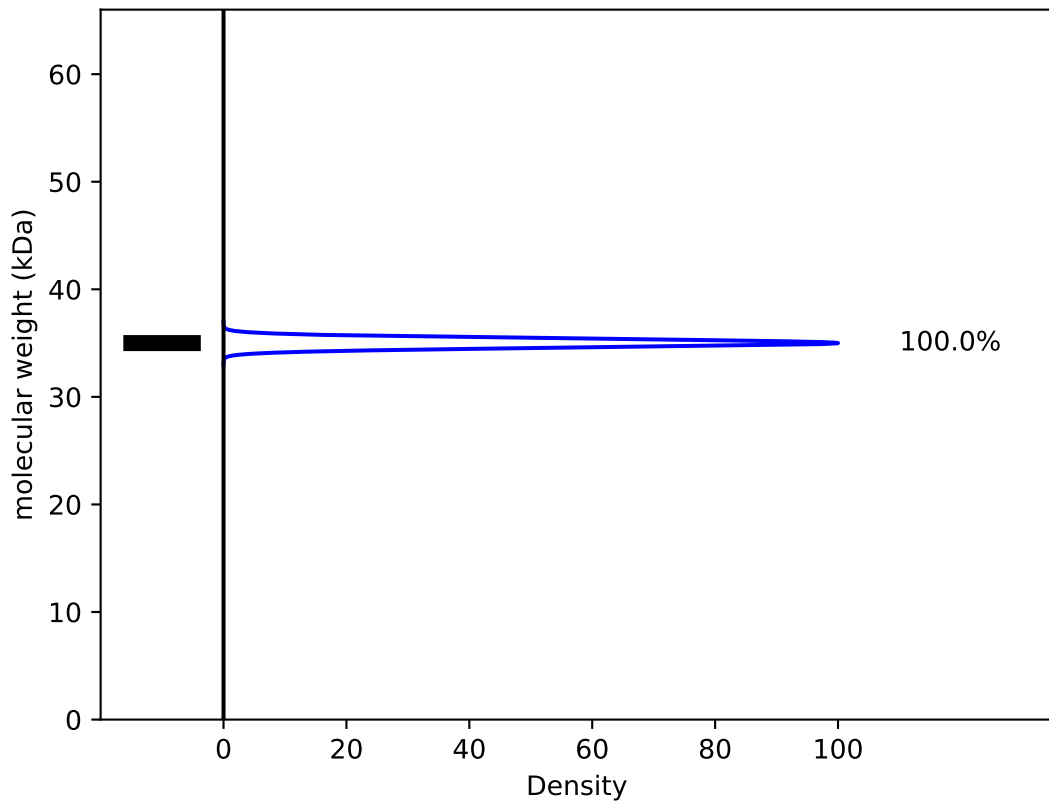

# Q14CN4

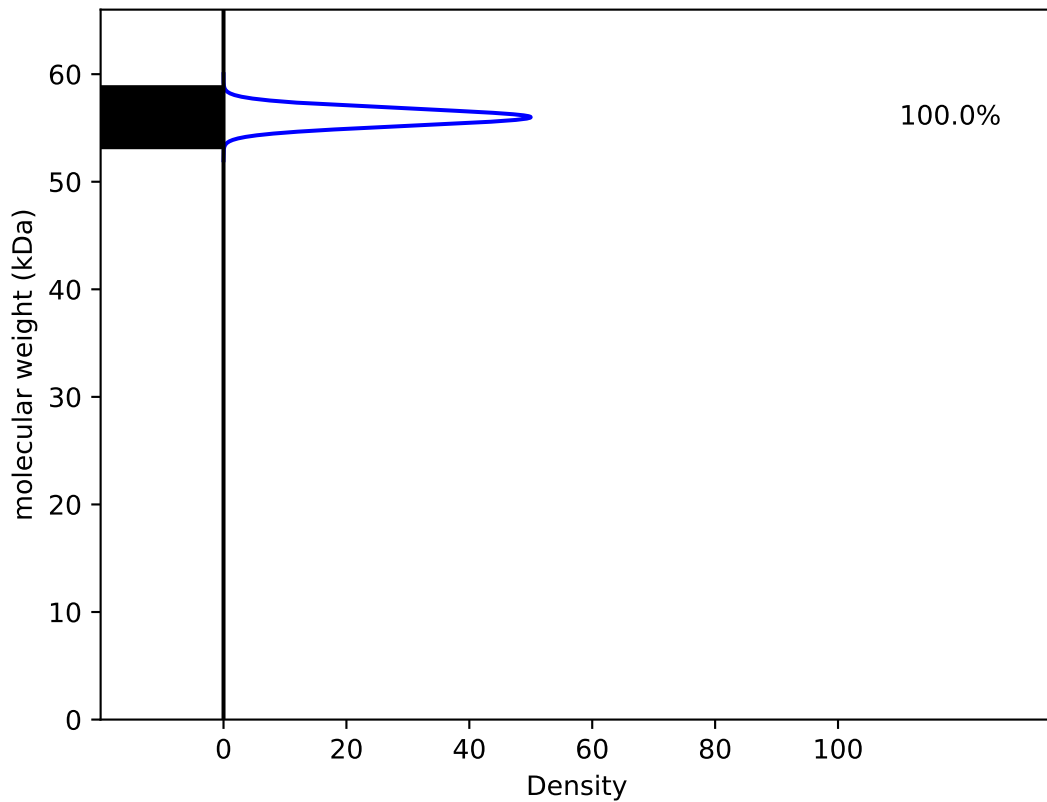

P08729

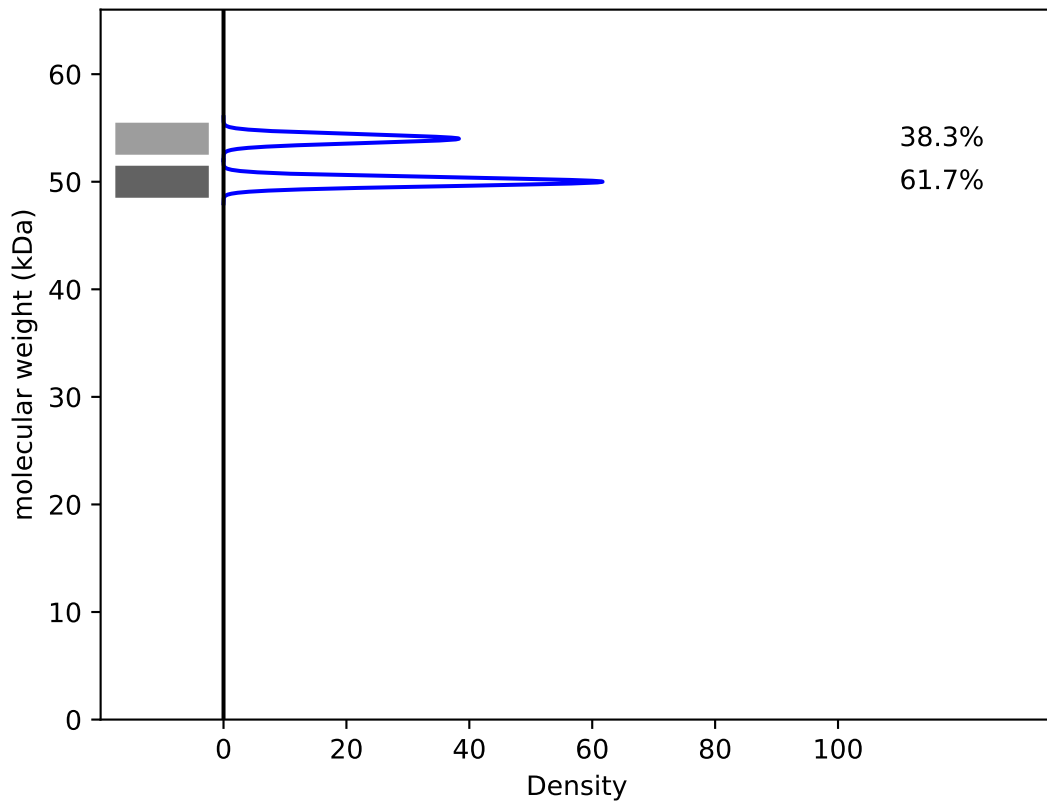



# A4D1E9

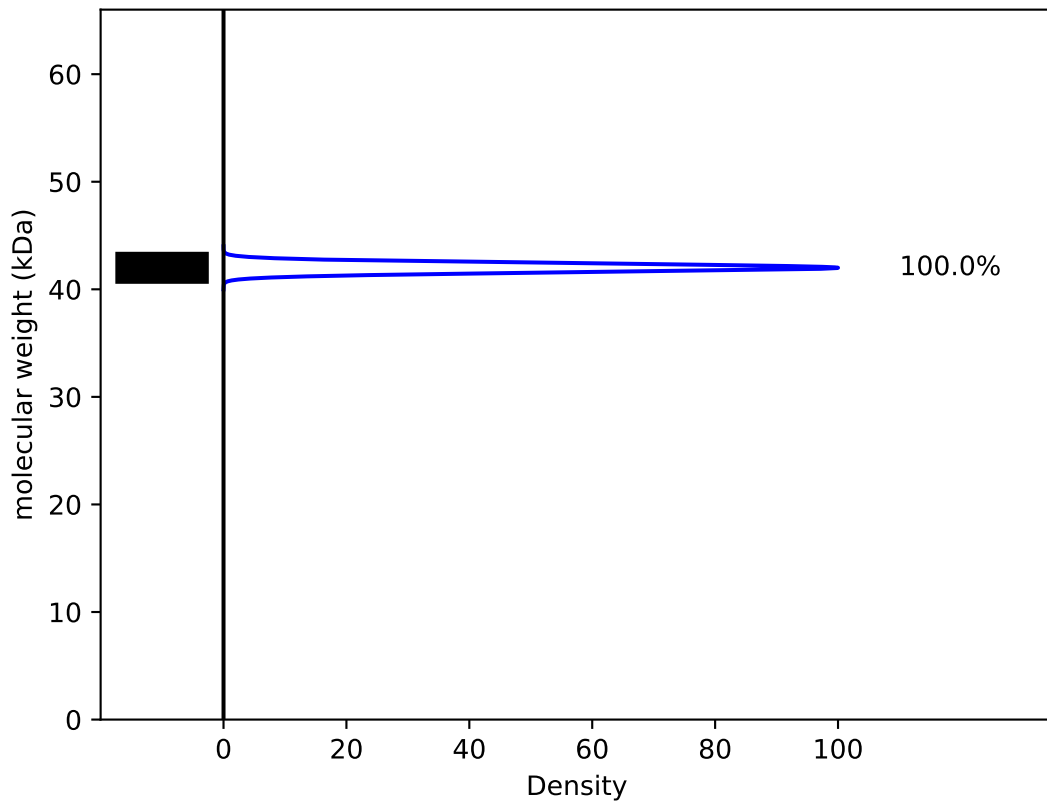

# A6NDG6

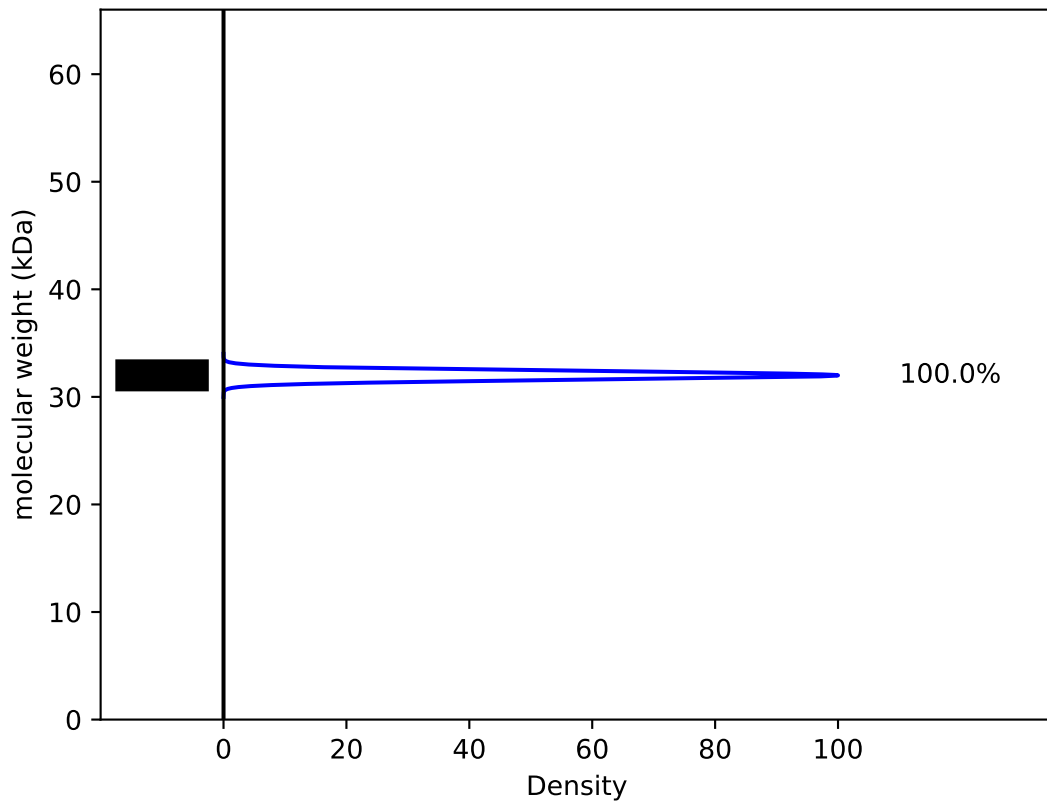

O00148

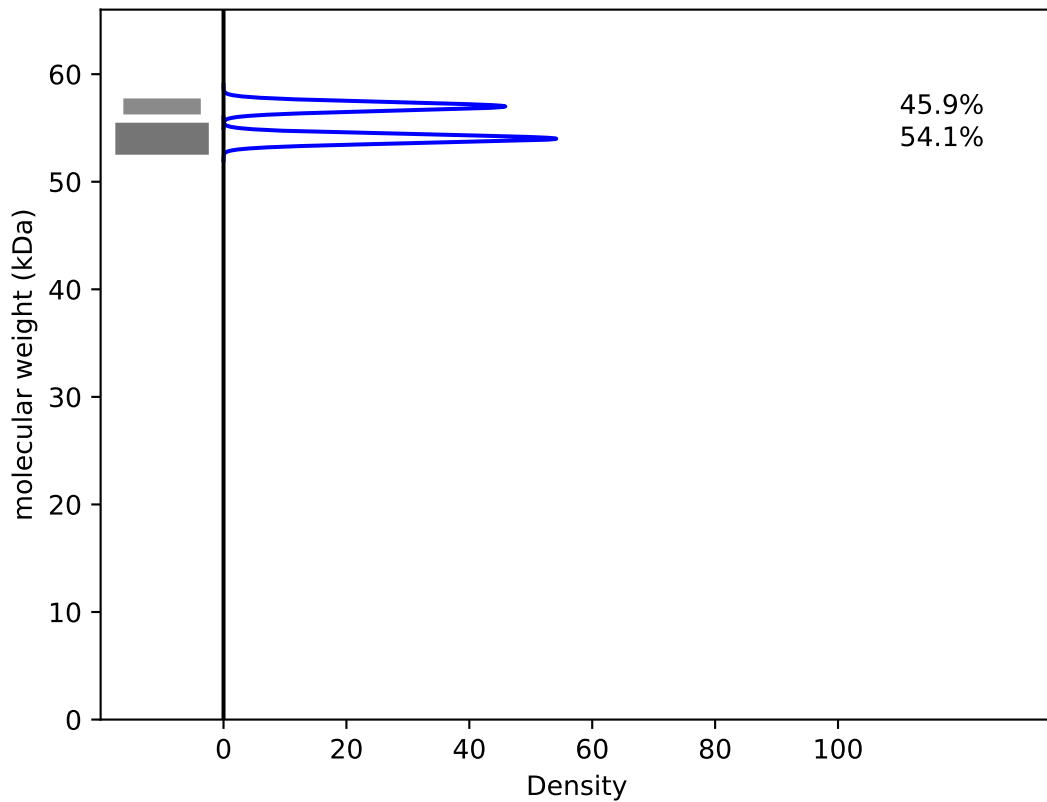

O00151

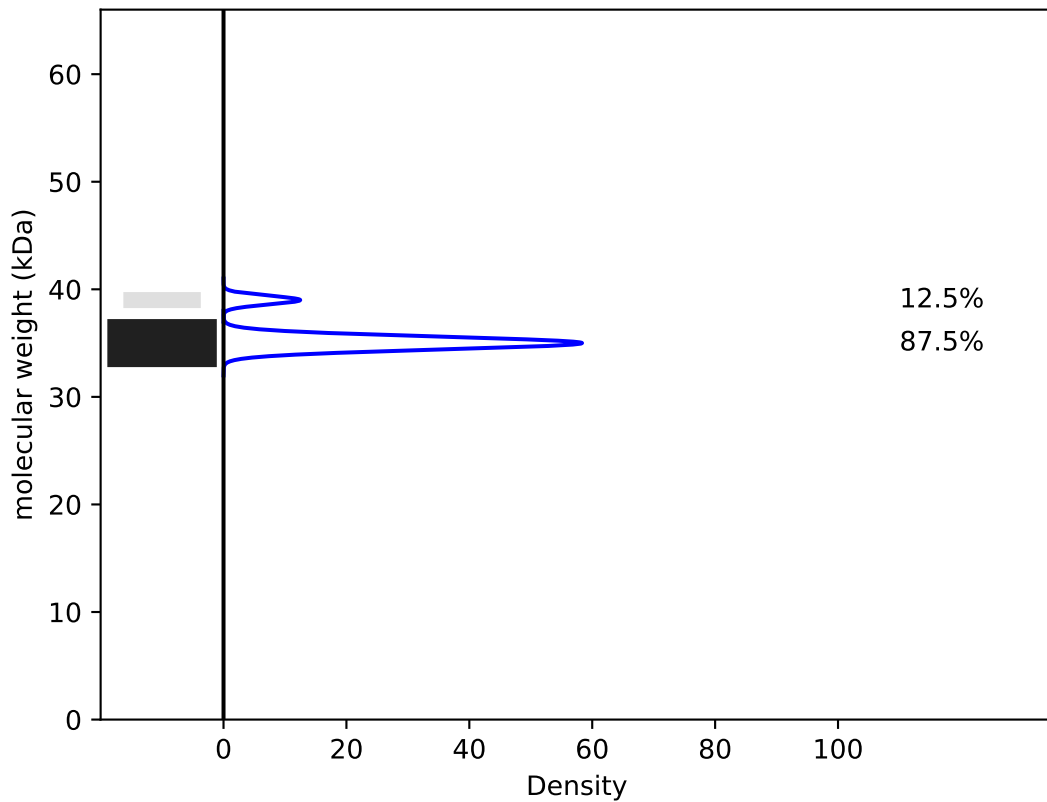

O00154

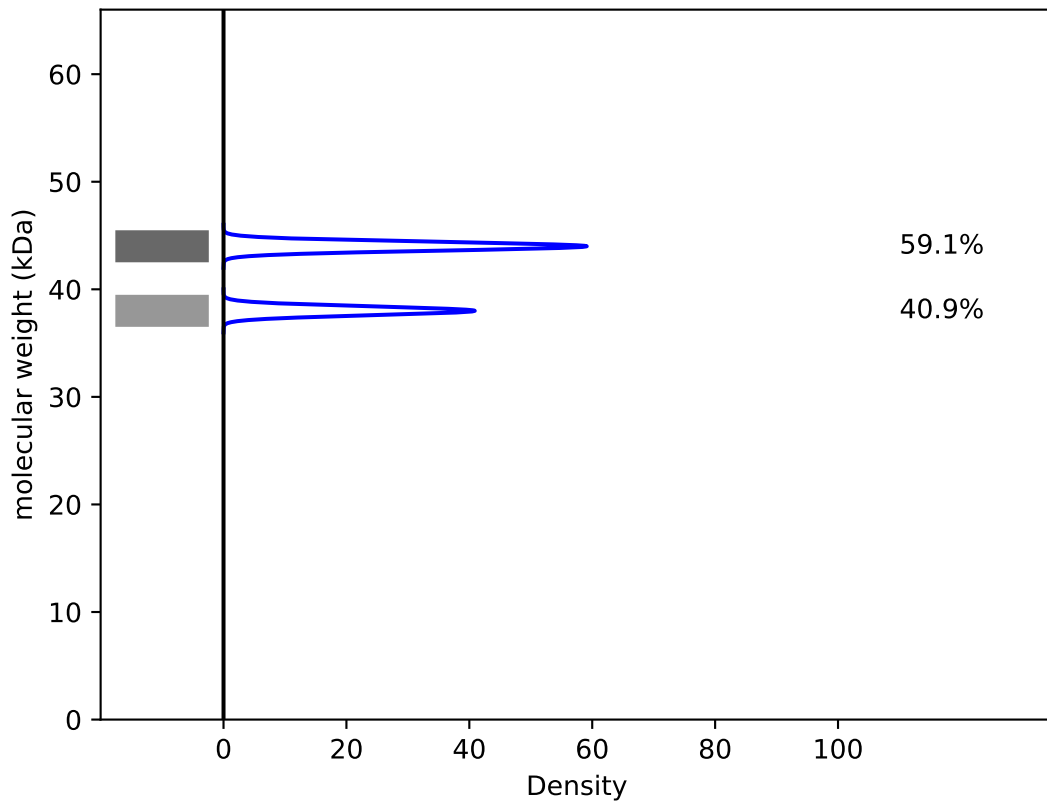

O00165

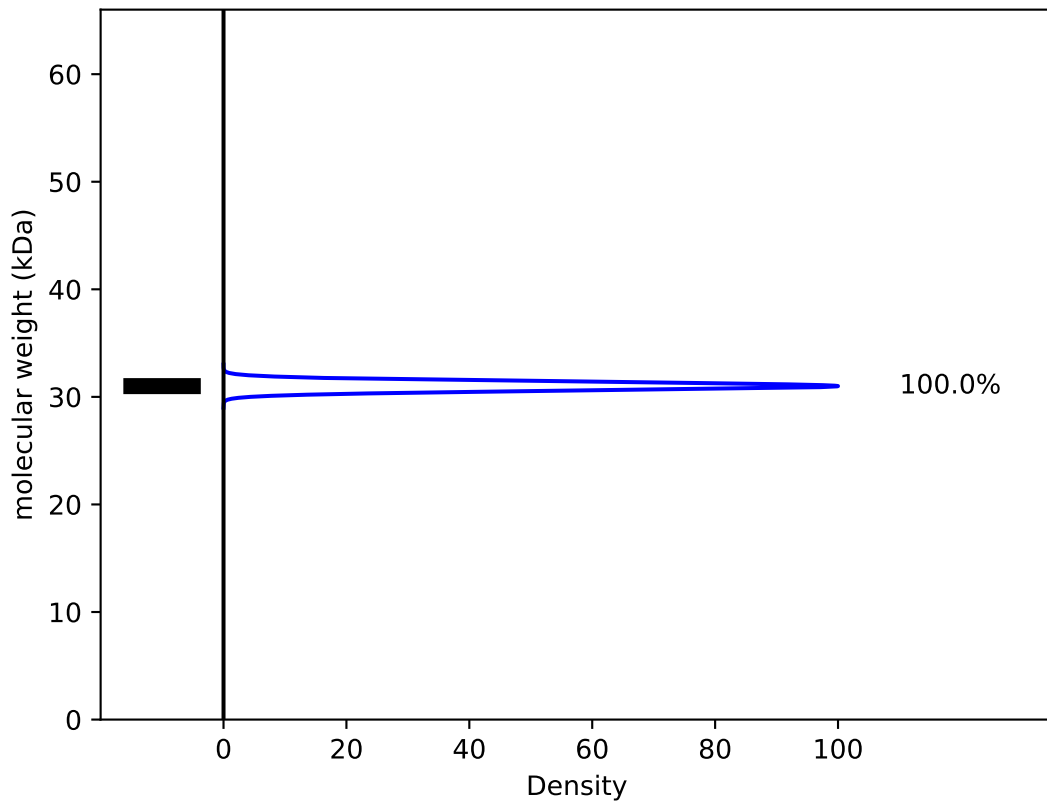

O00217

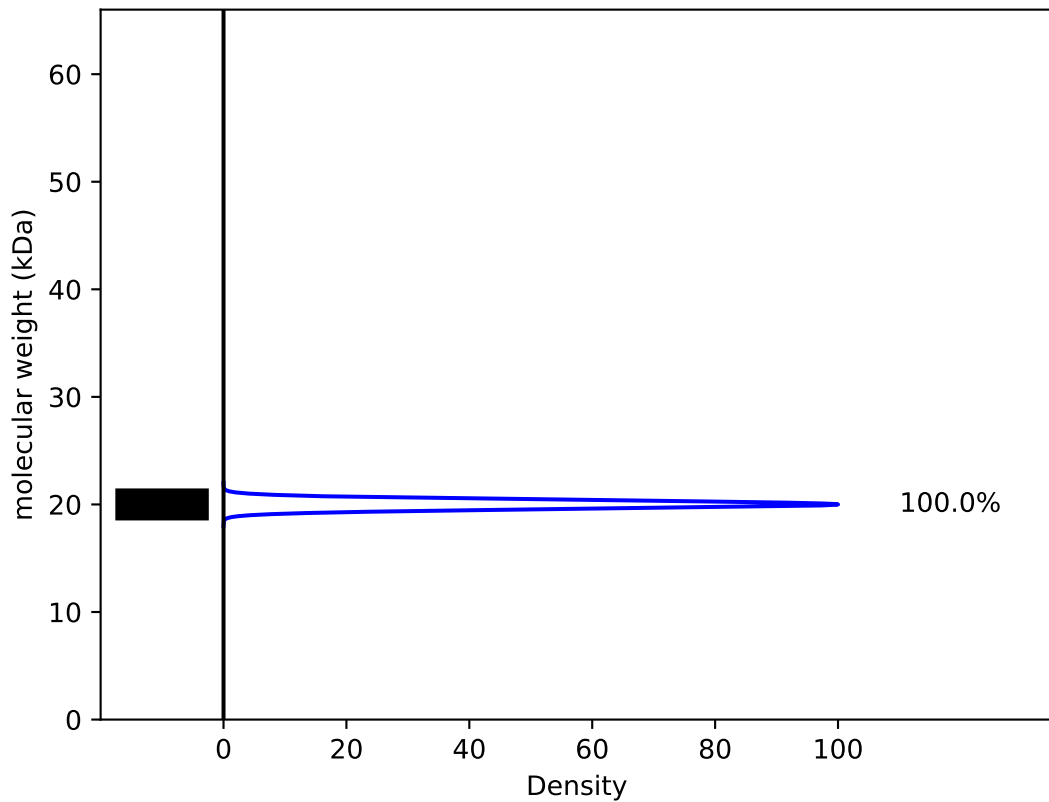

O00231

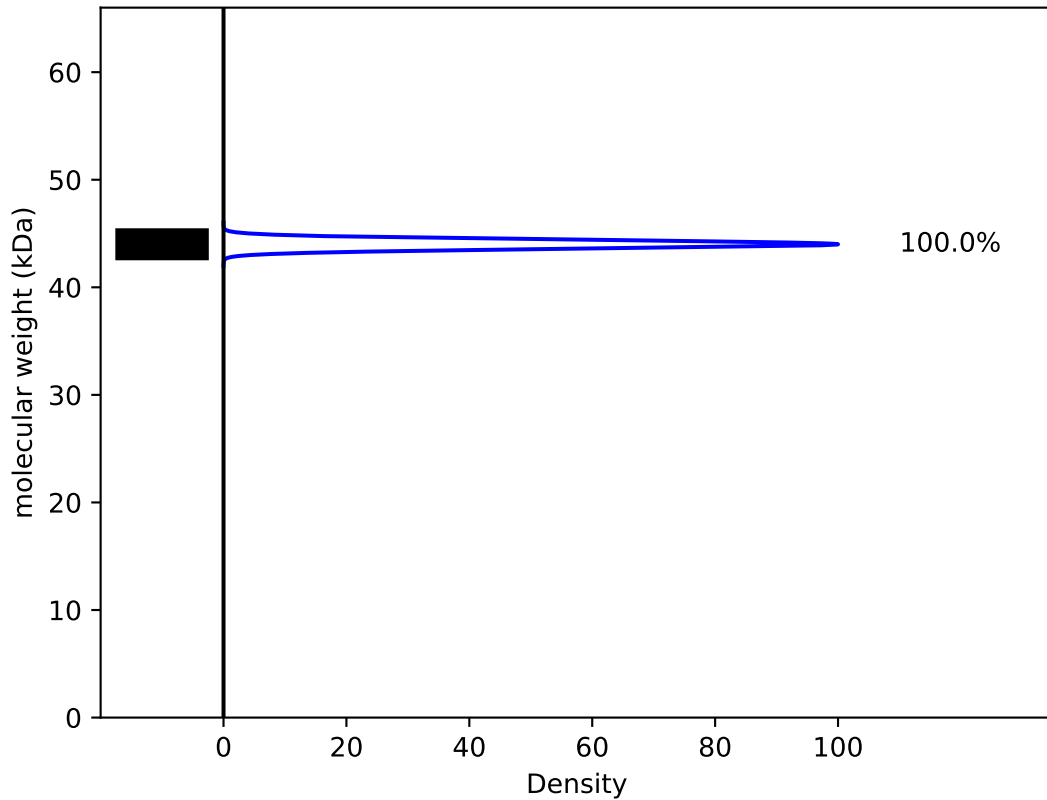



000232

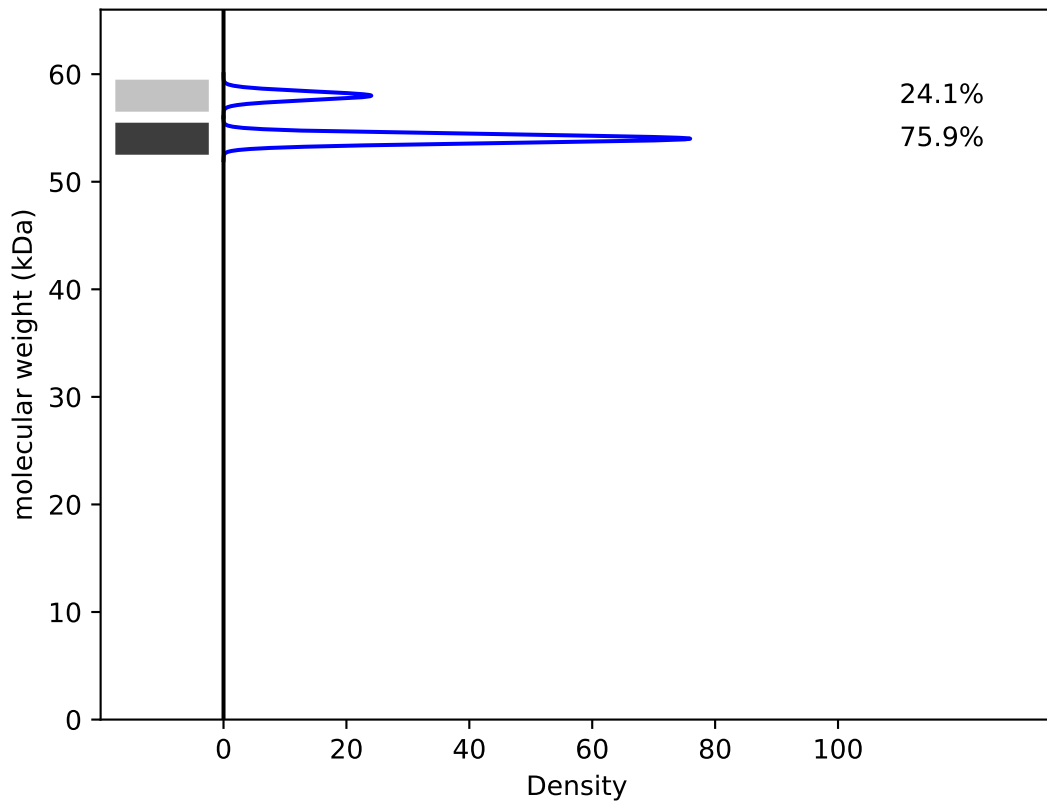

000233

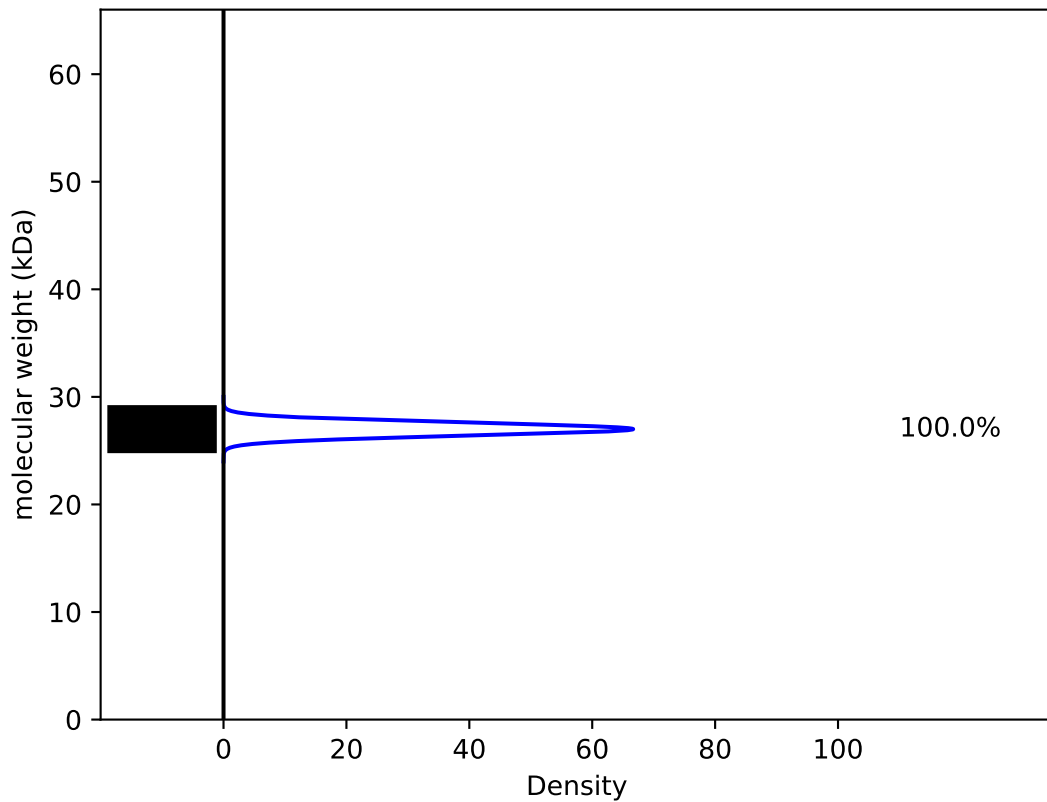

O00264

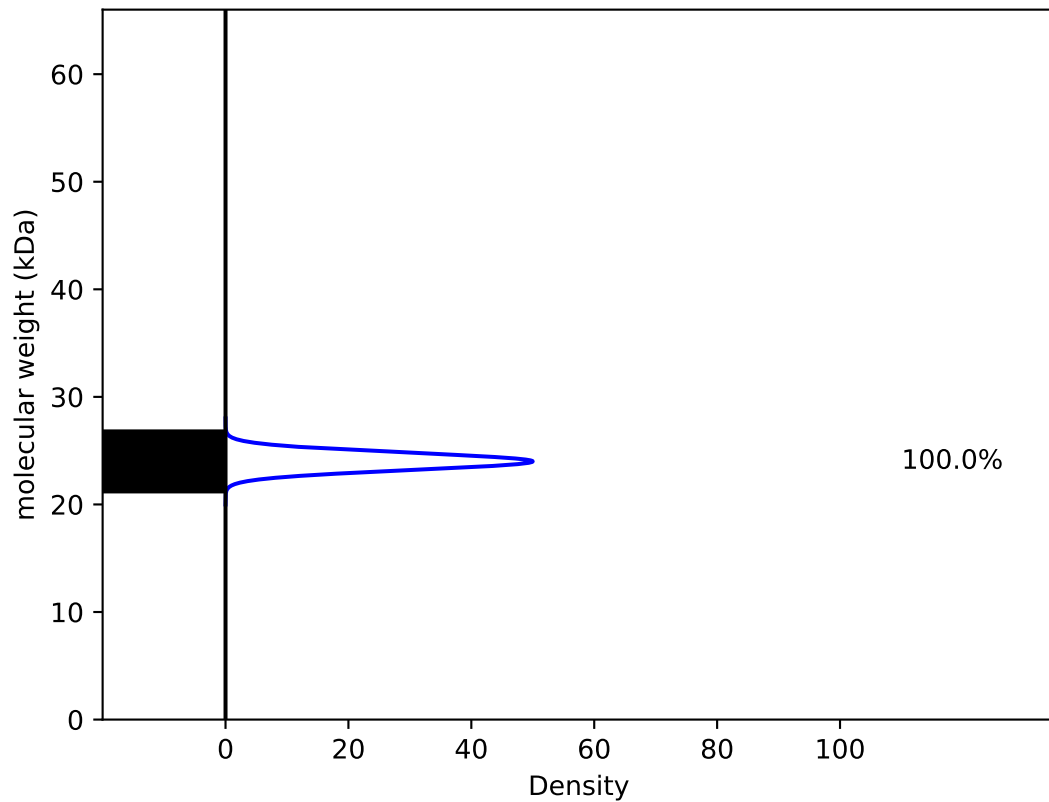

000273

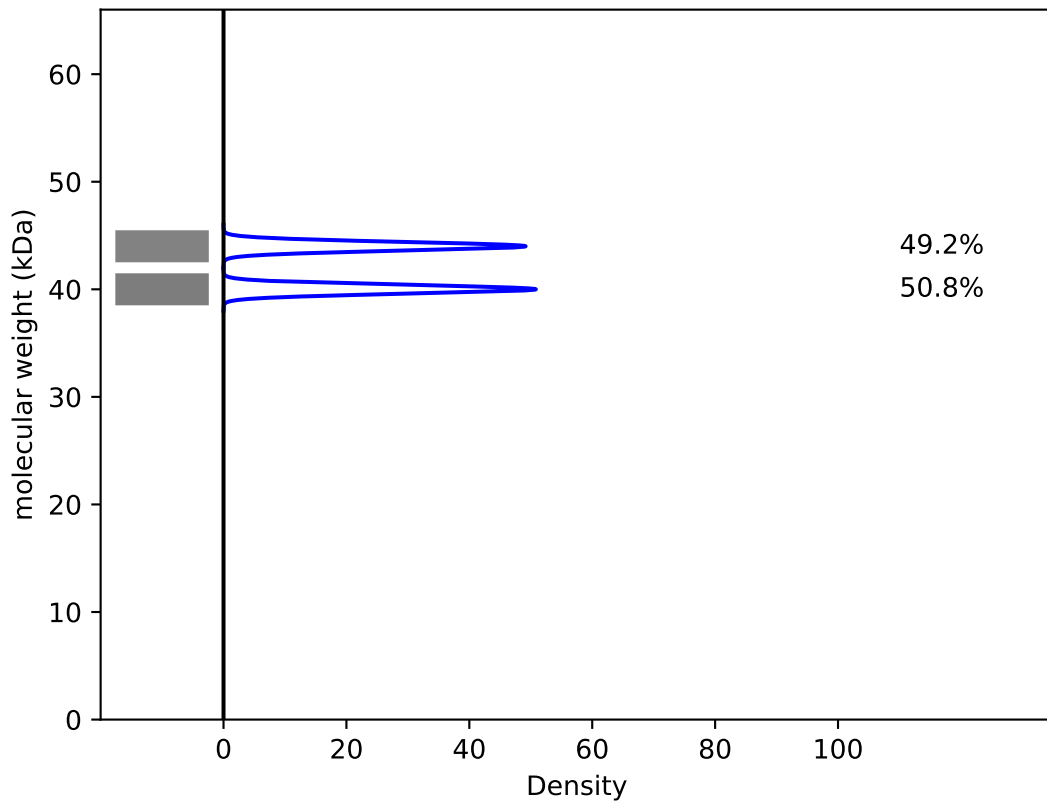

000299

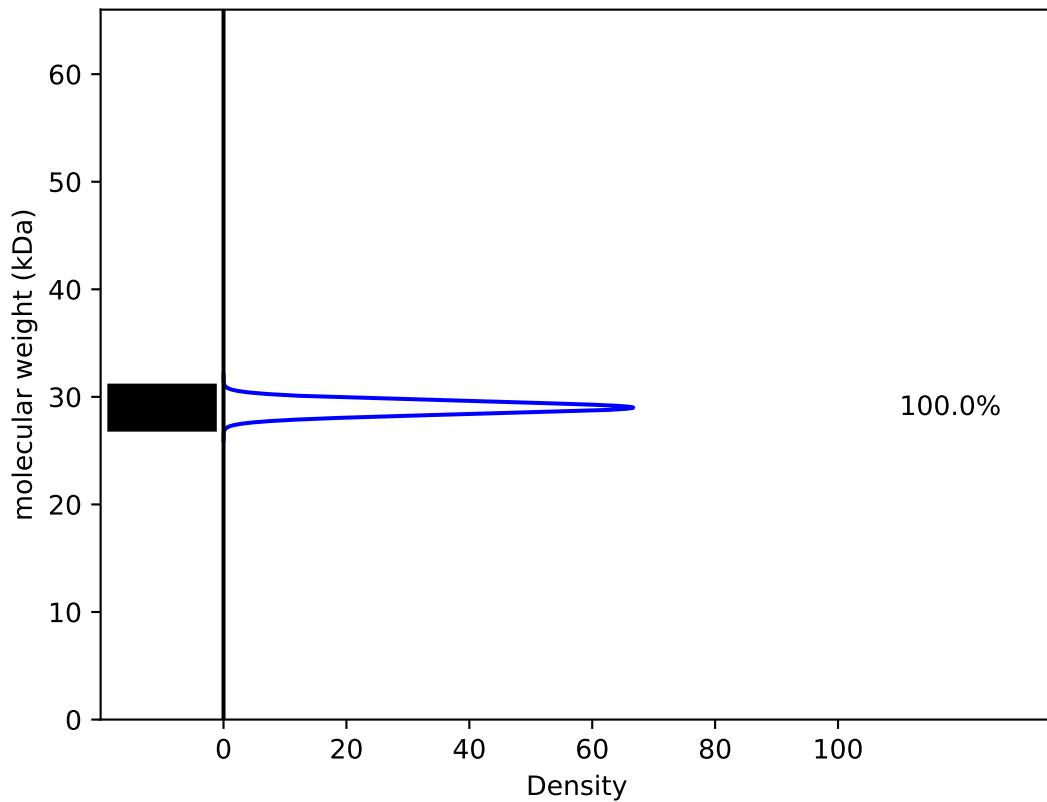

O00487

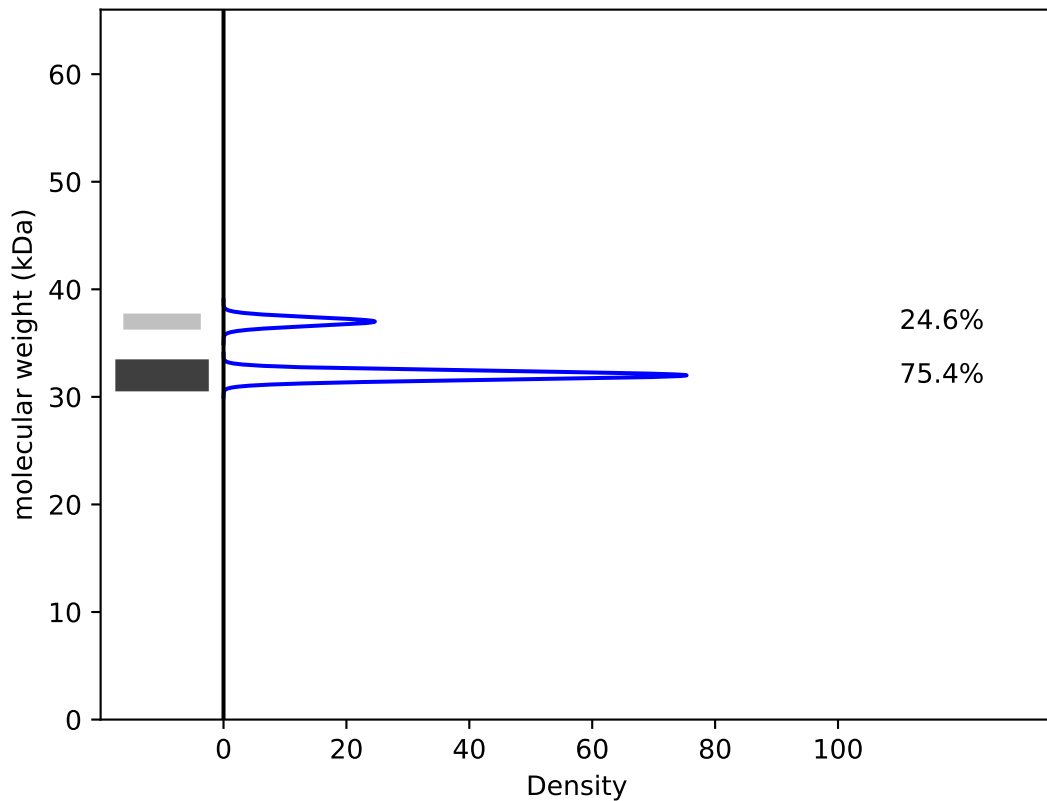

O00505

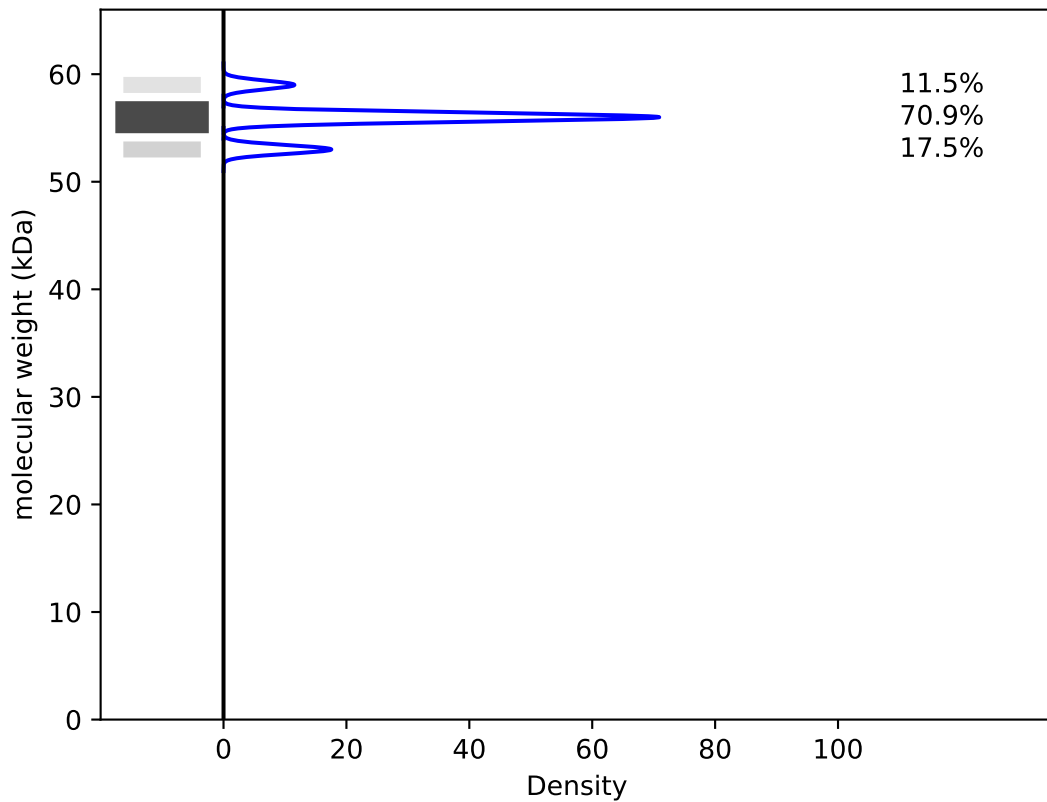

O00560

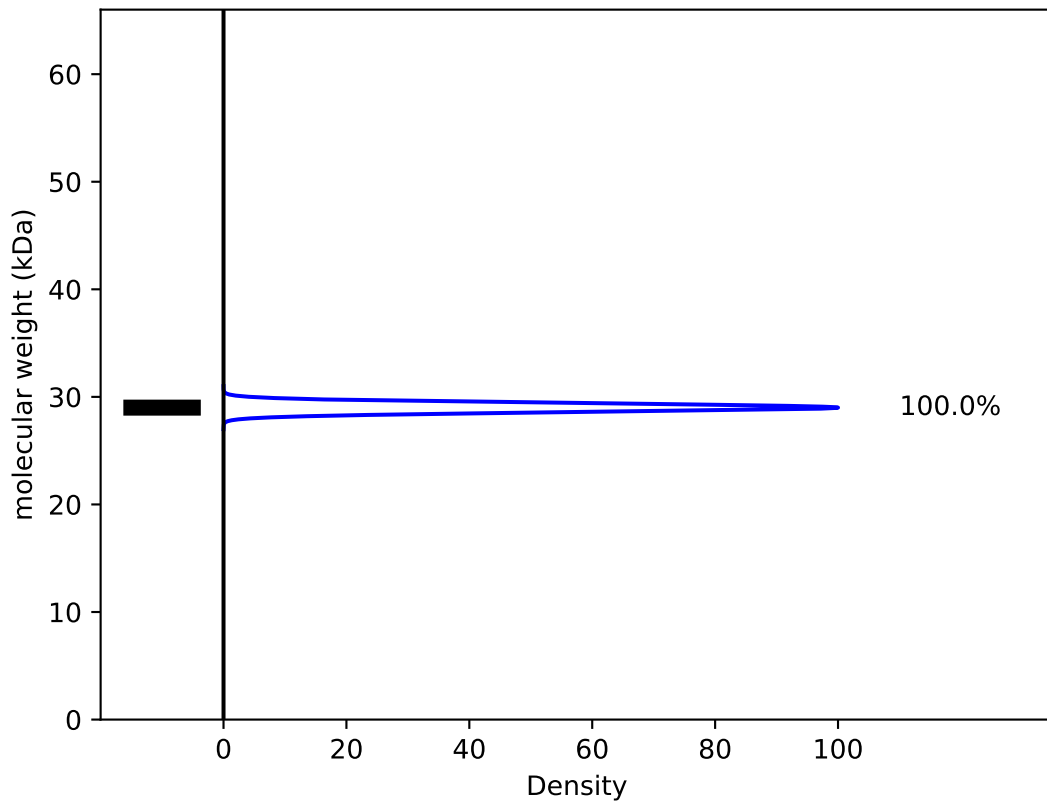



O00625



O00629

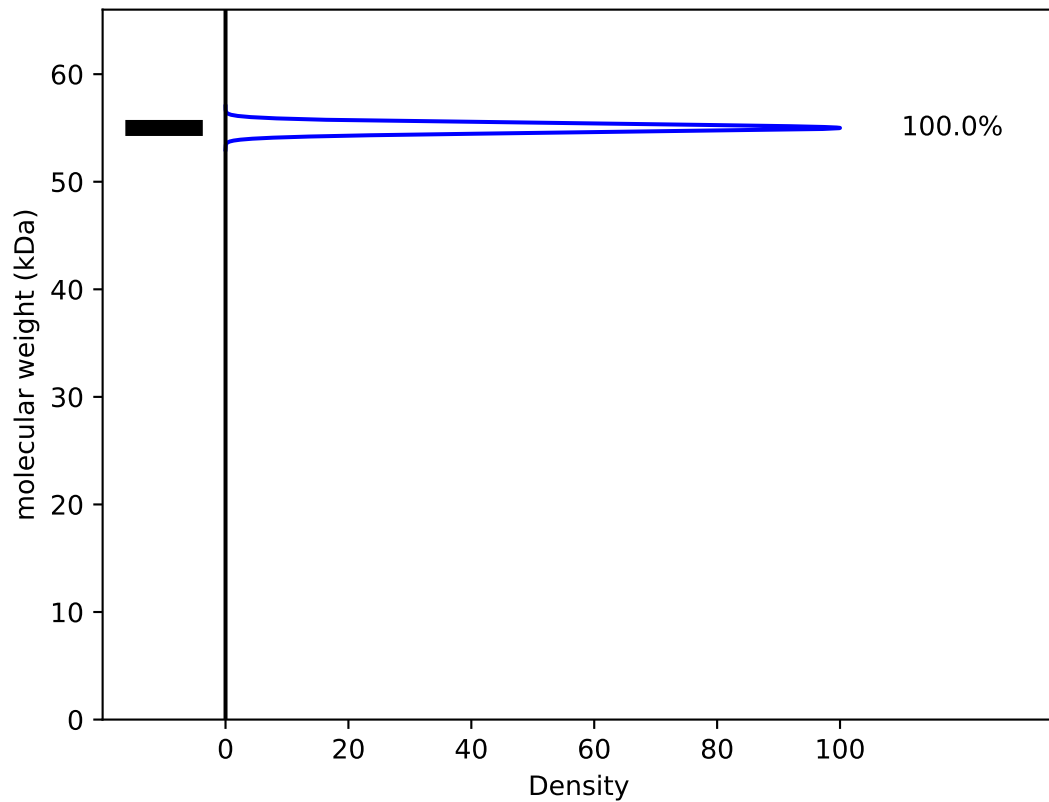

O00743

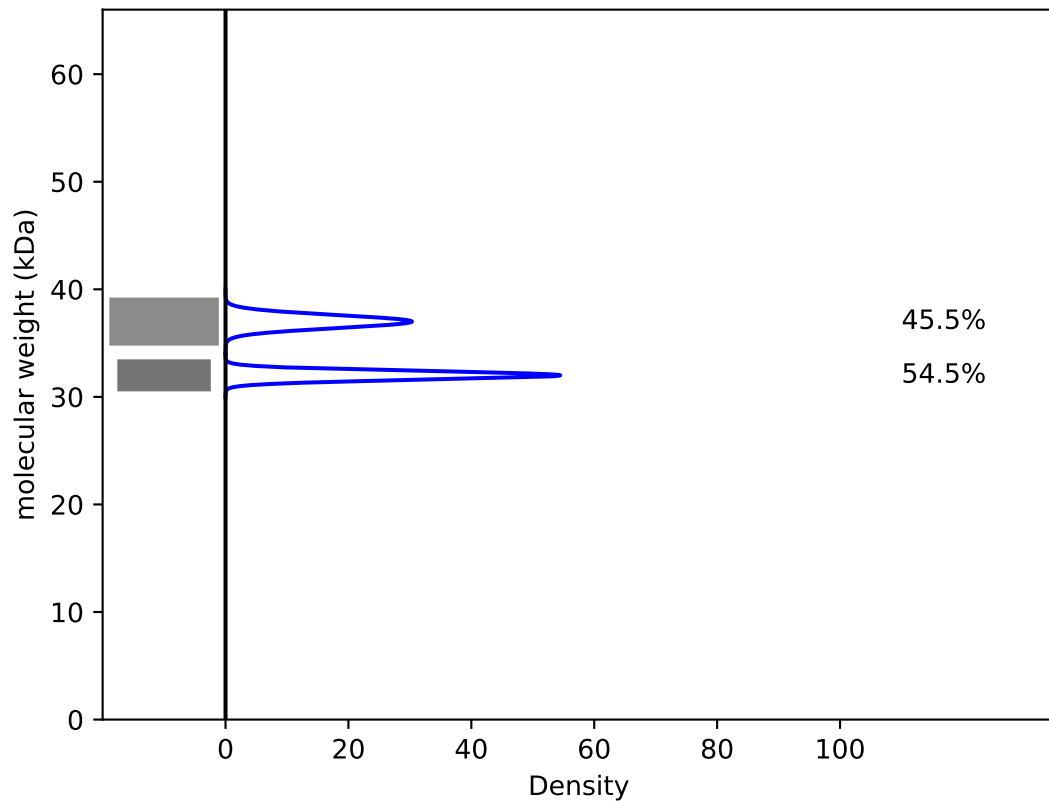

O00764

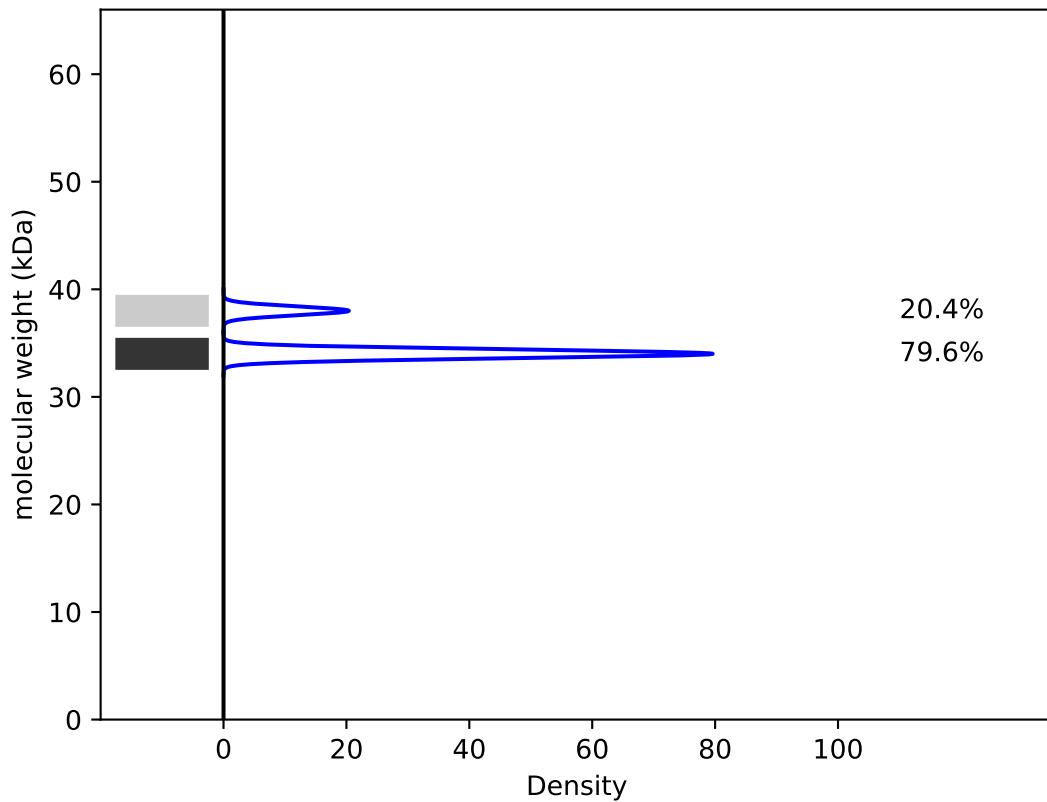

O14530

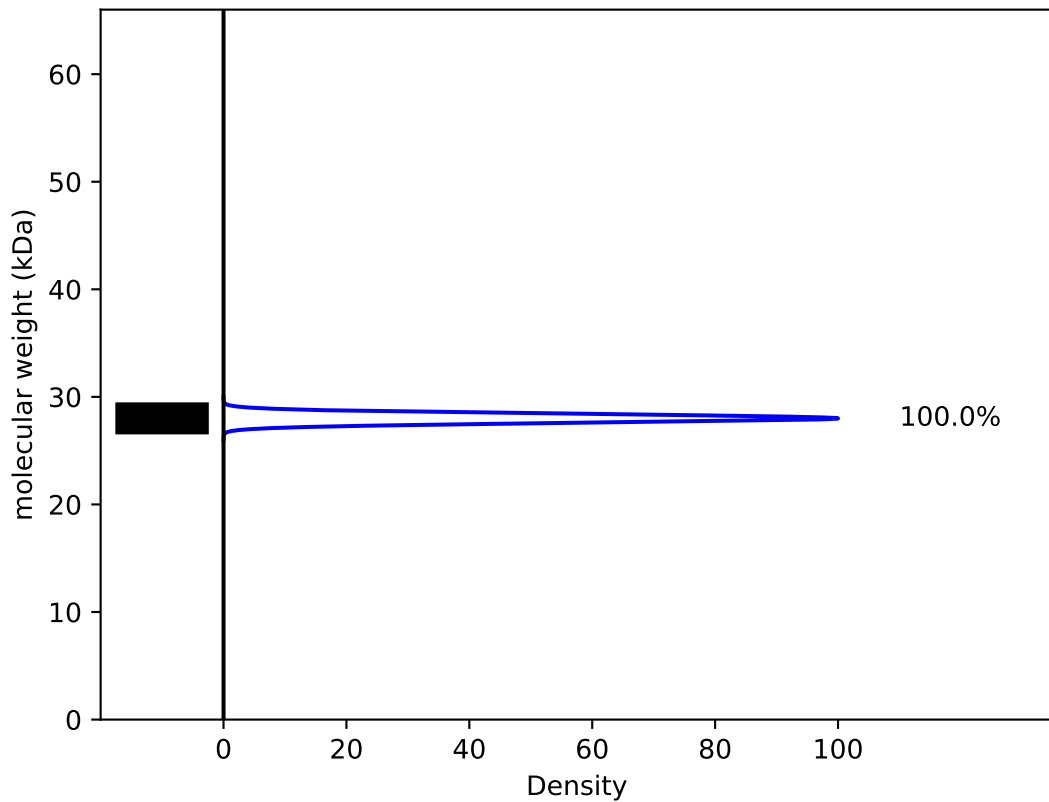

O14579

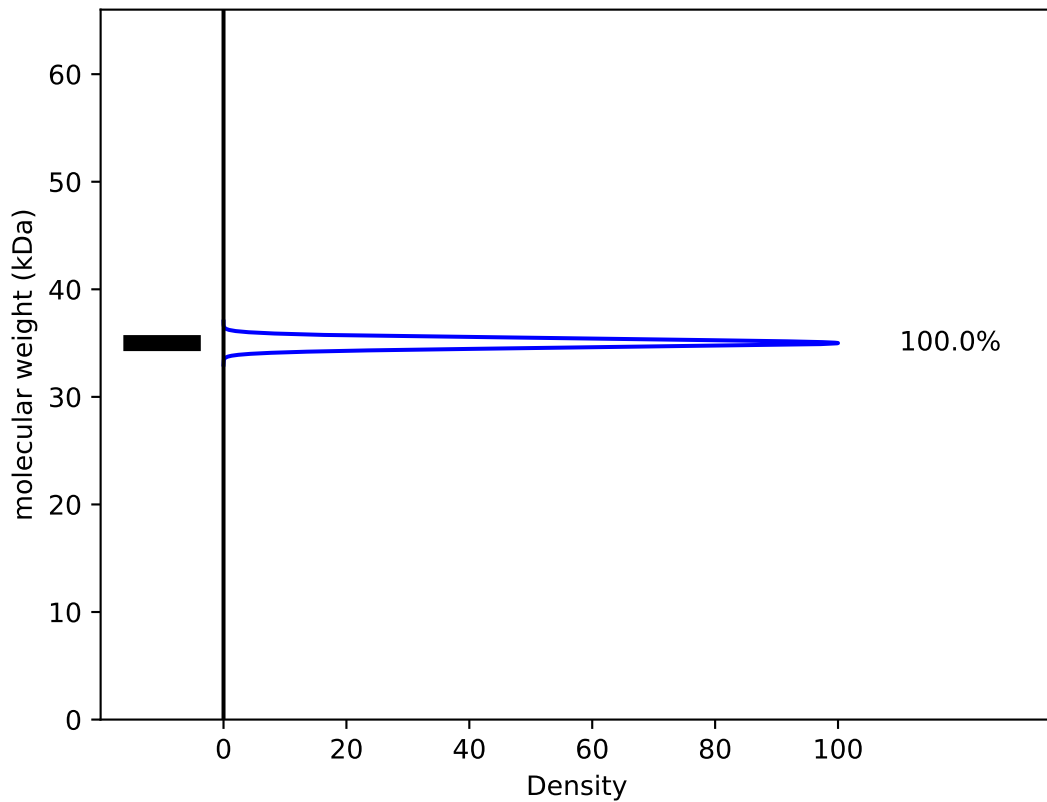

# O14656

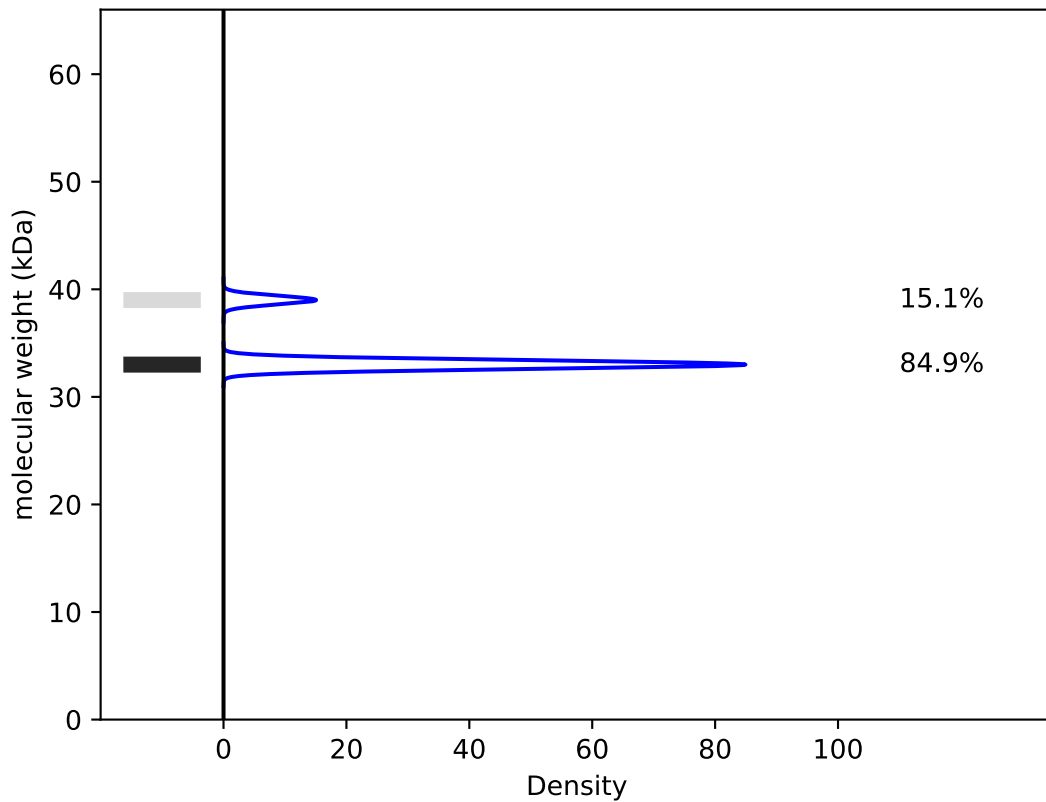

O14684

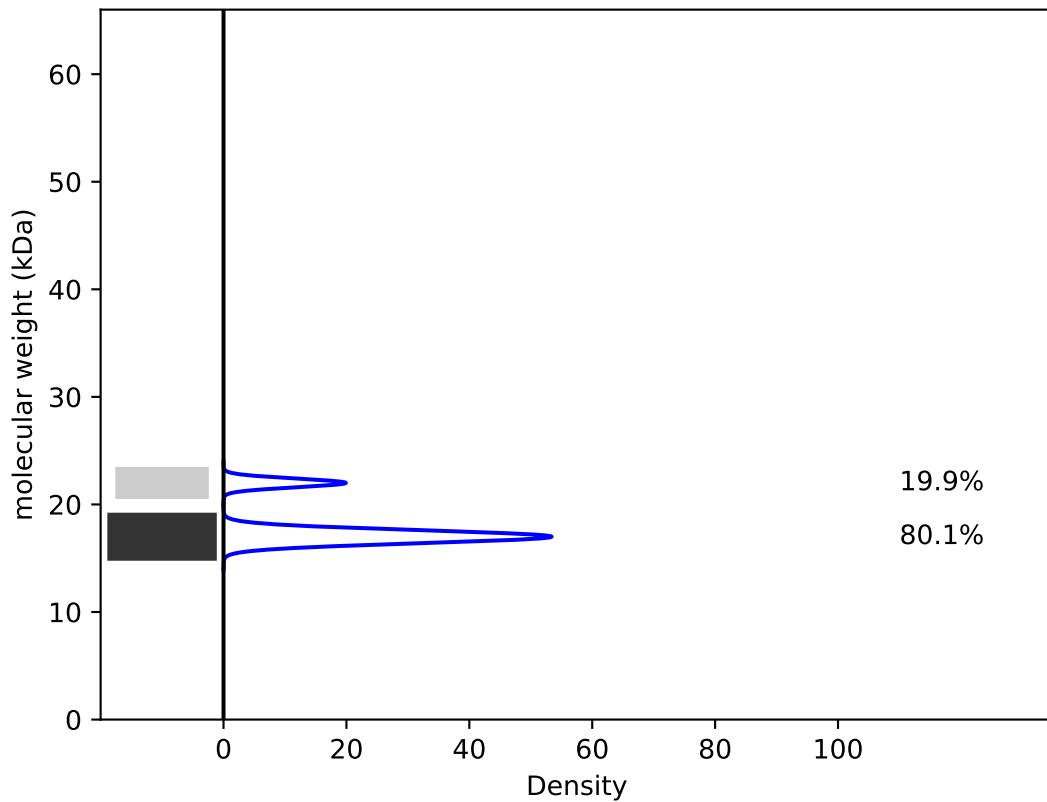



# O14732

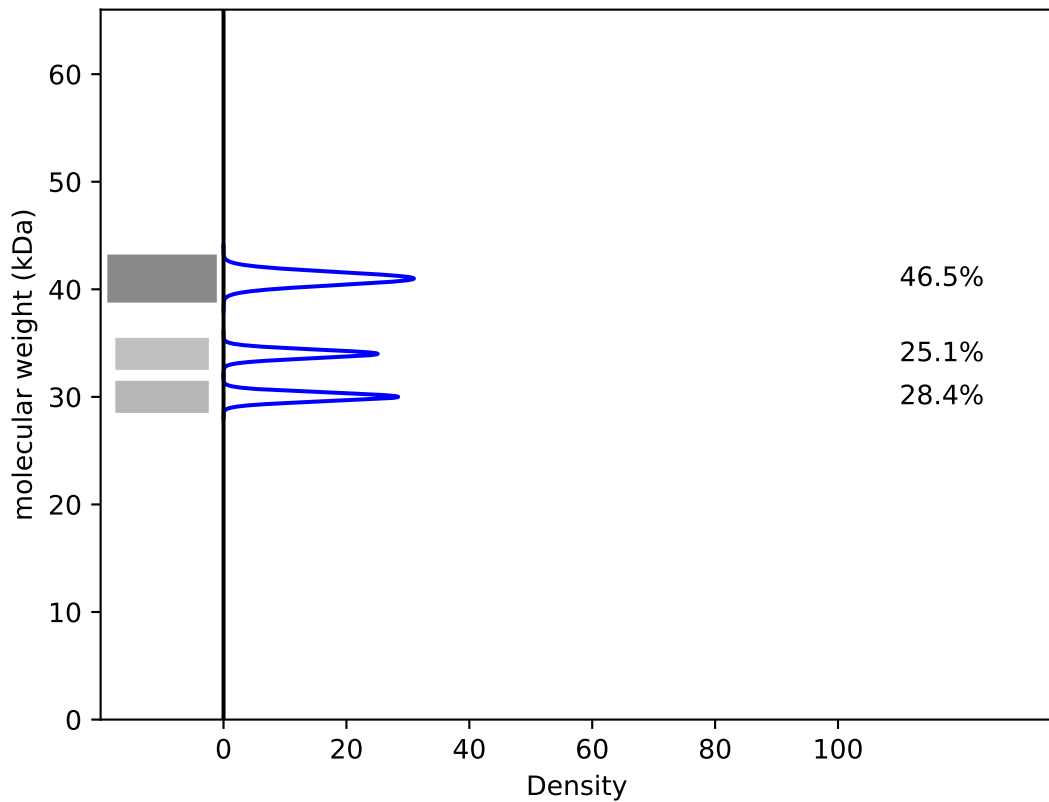

O14818

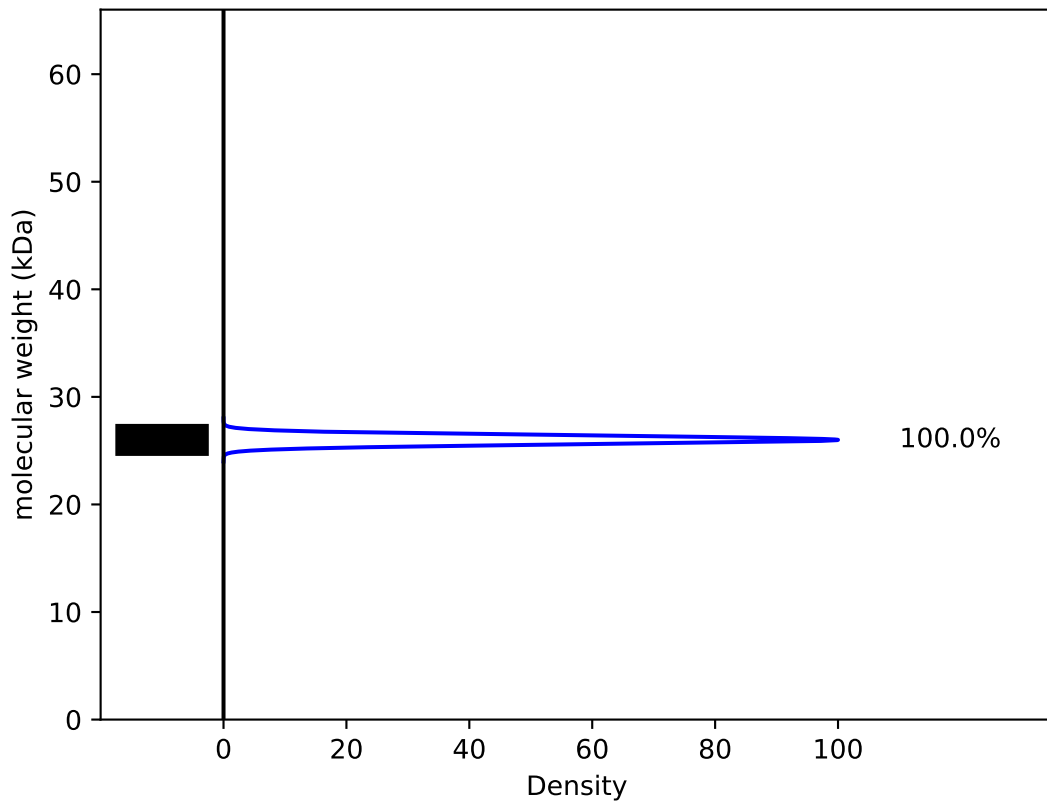

# Q8TAA3



# O14828

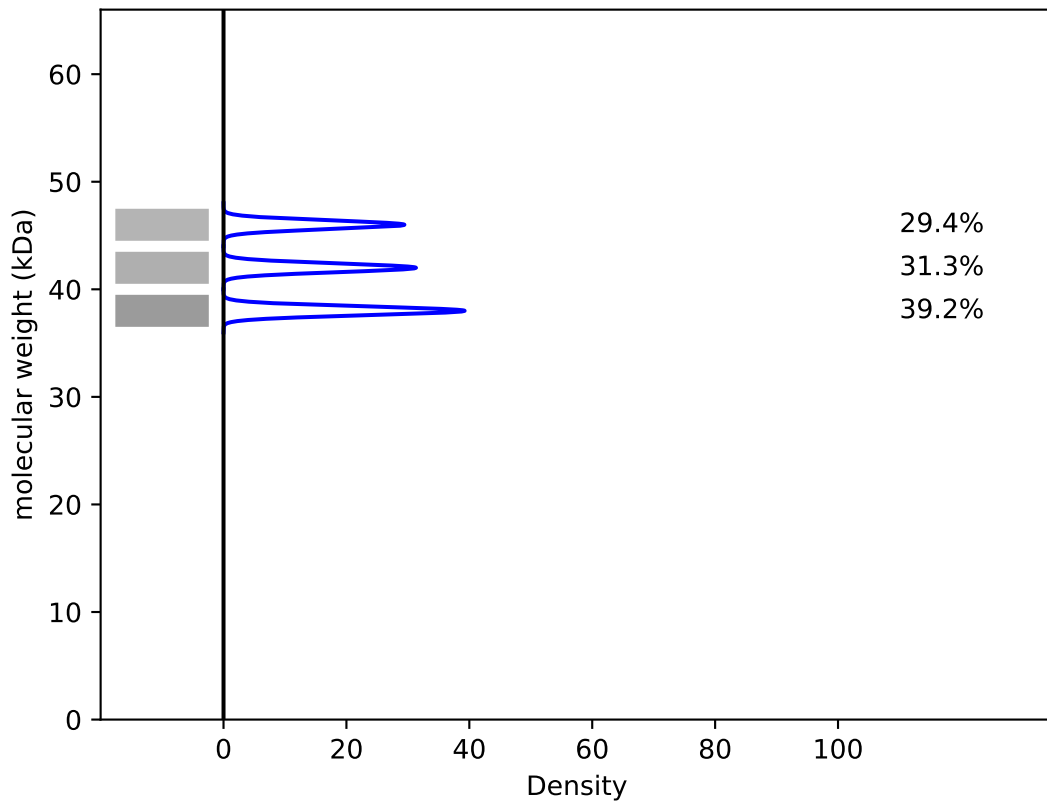

# O14880

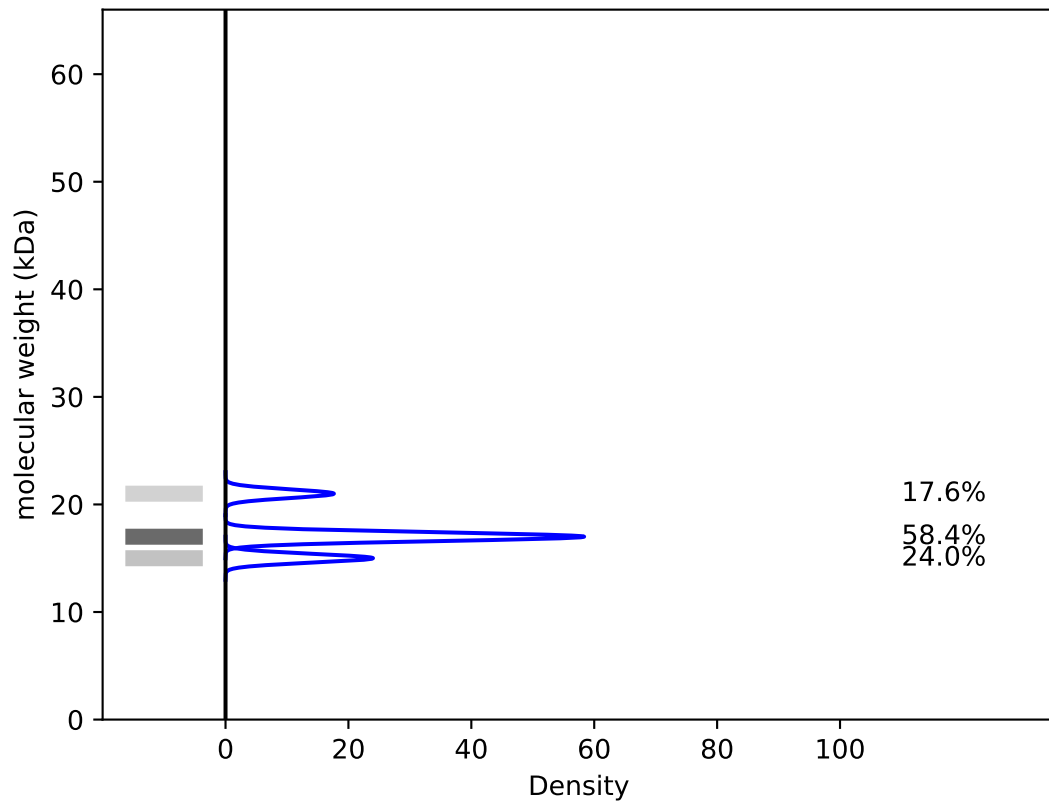

# O14908

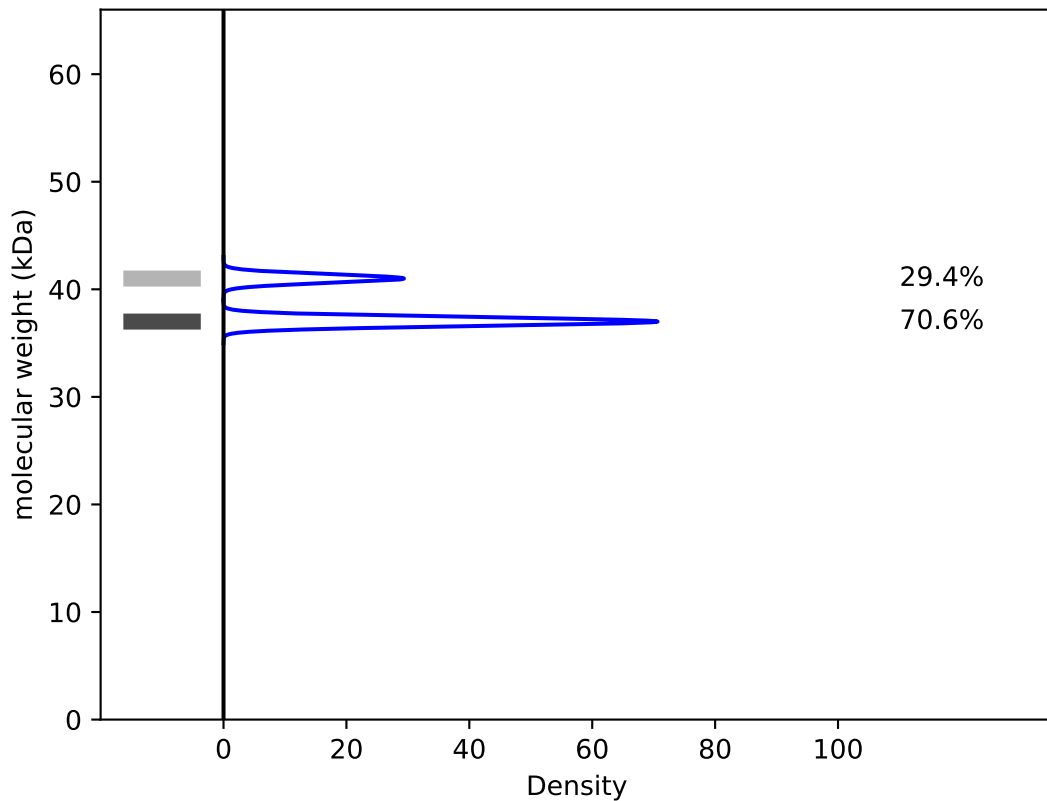

O14925

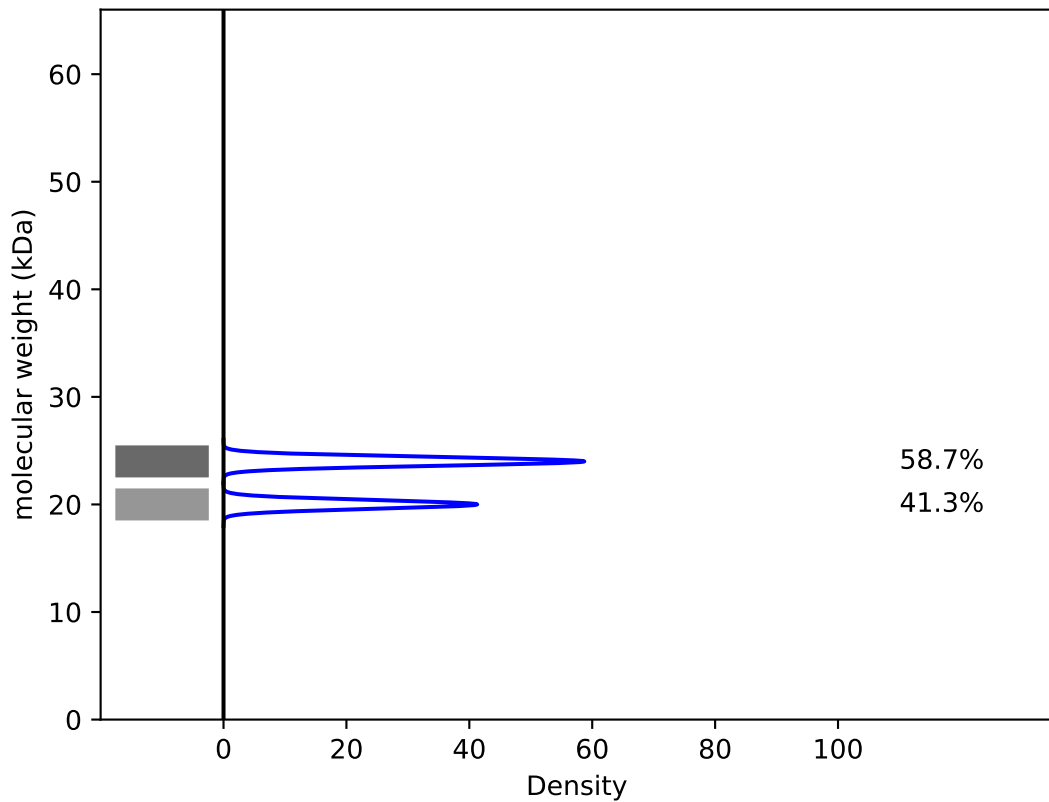

O14929

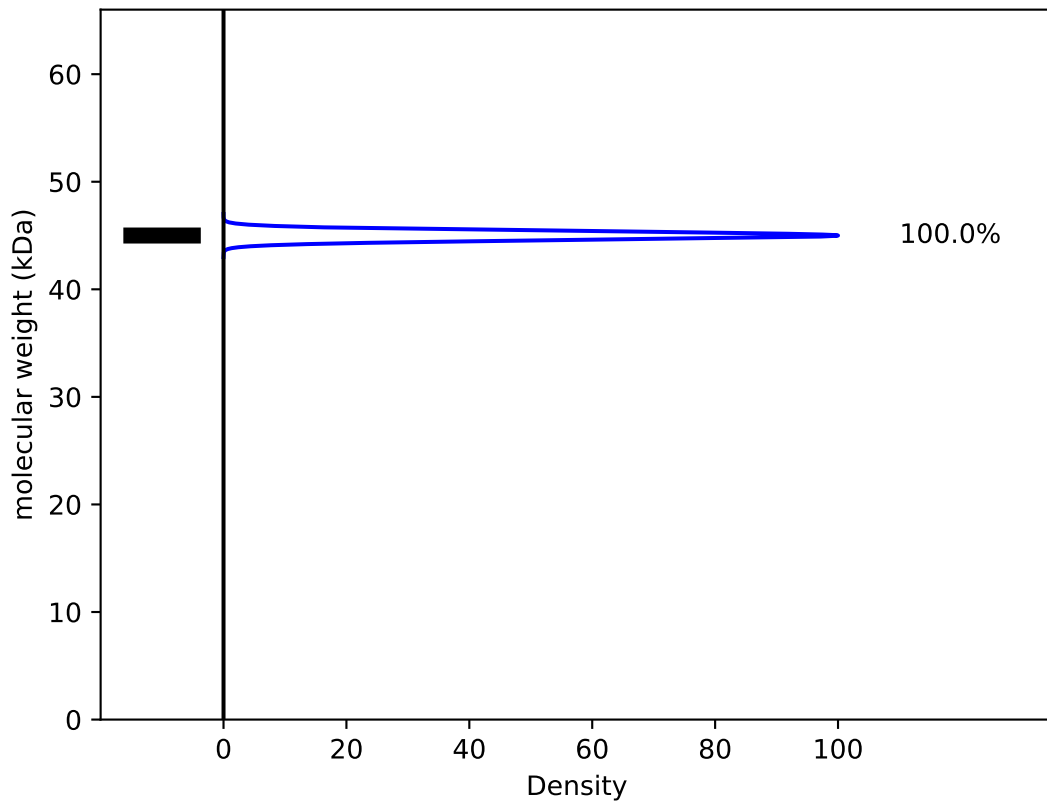



# P19105

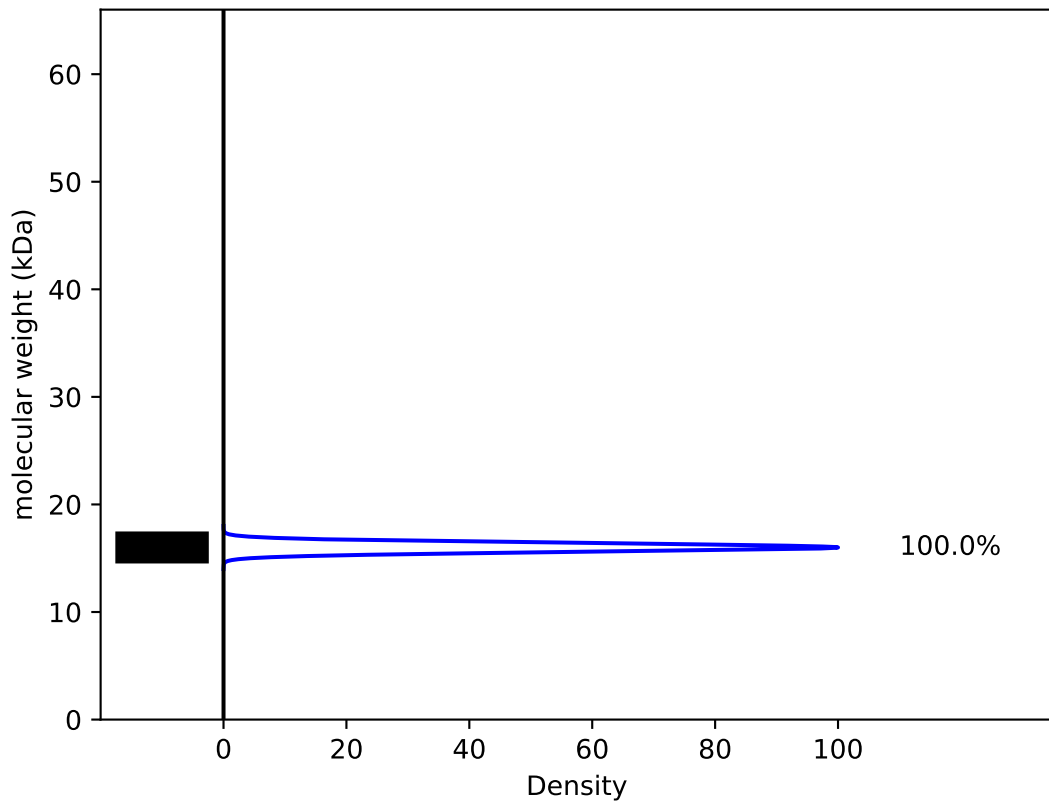

O14950



P24844

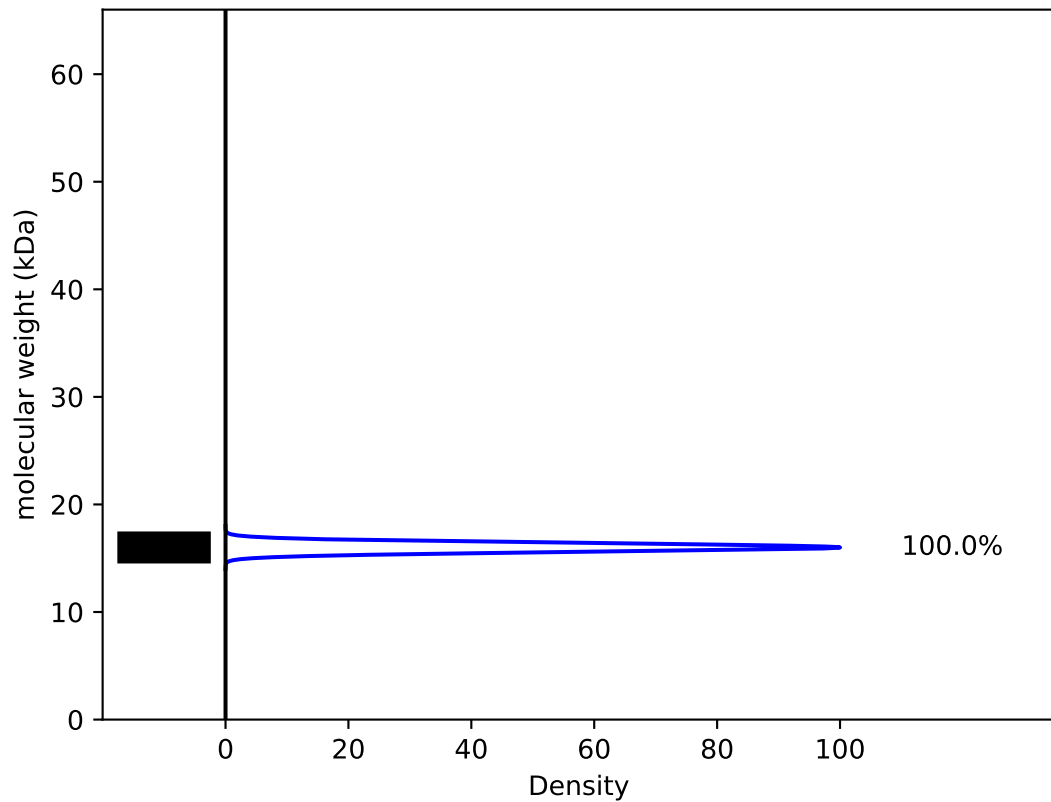

# O15143

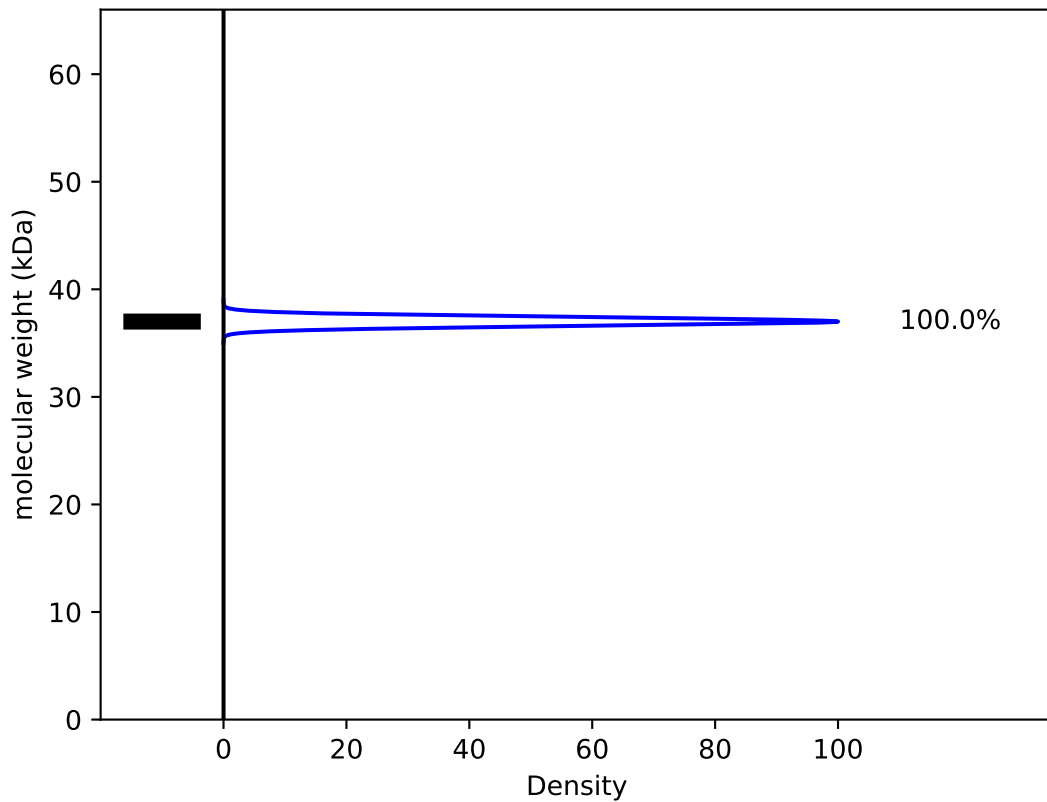

# O15145

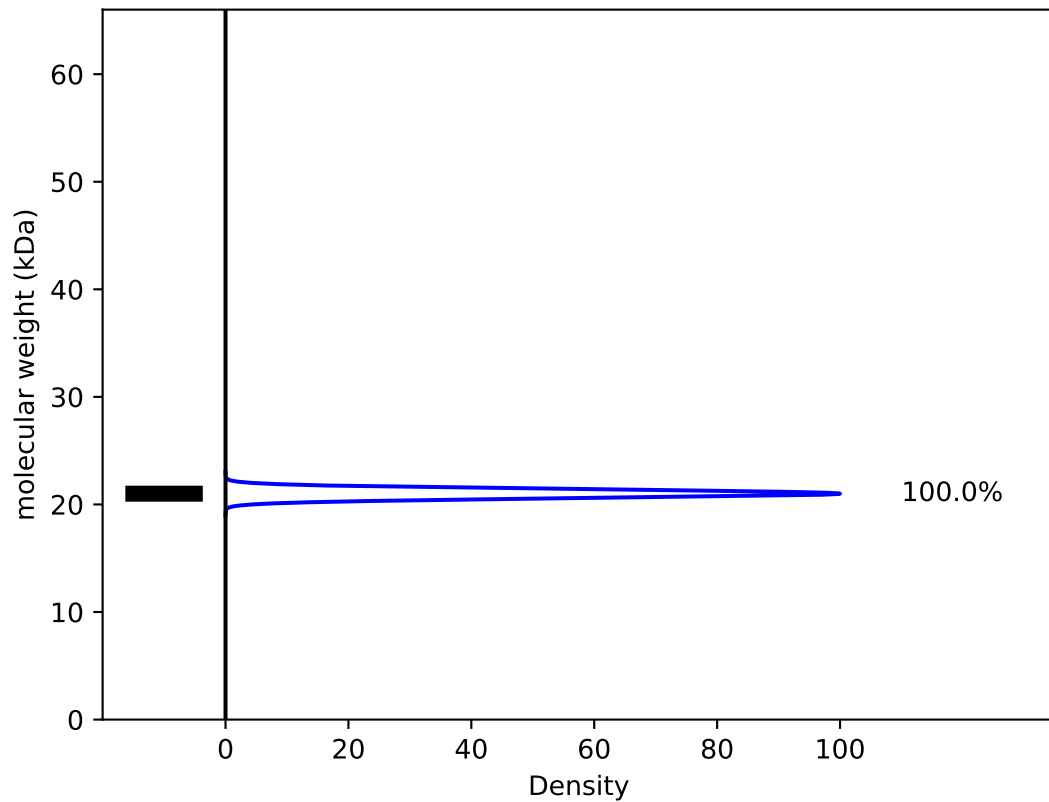

# O15160

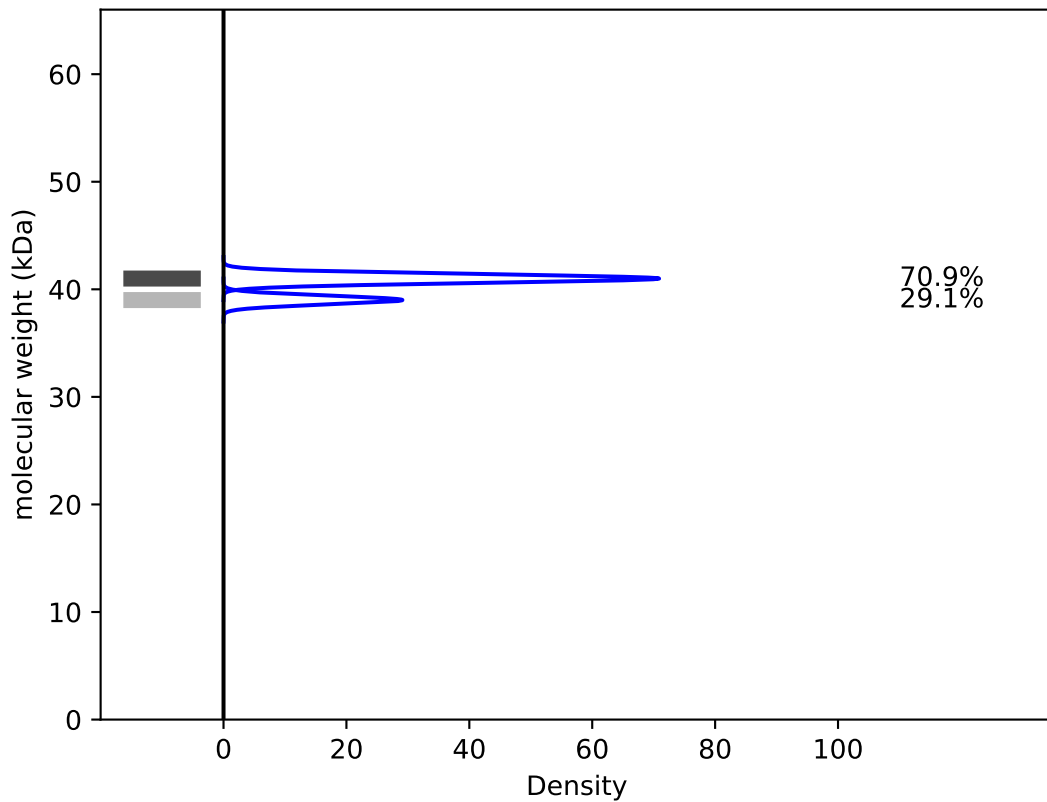

O15173



O15347

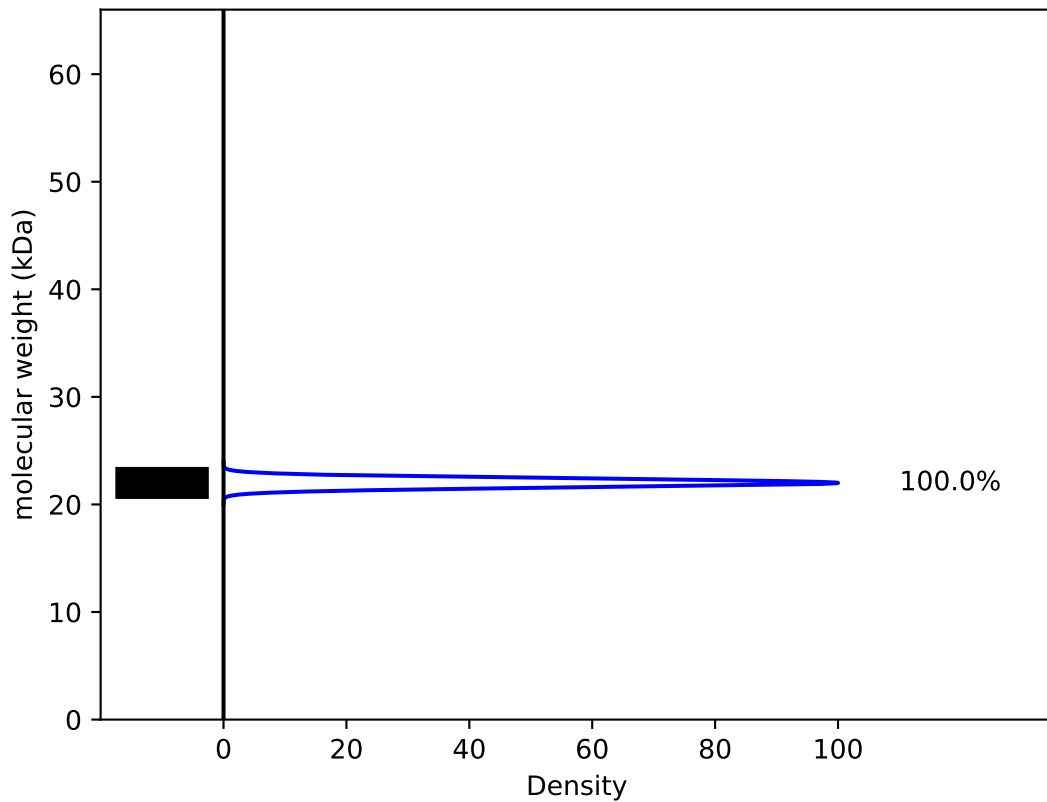



O15372

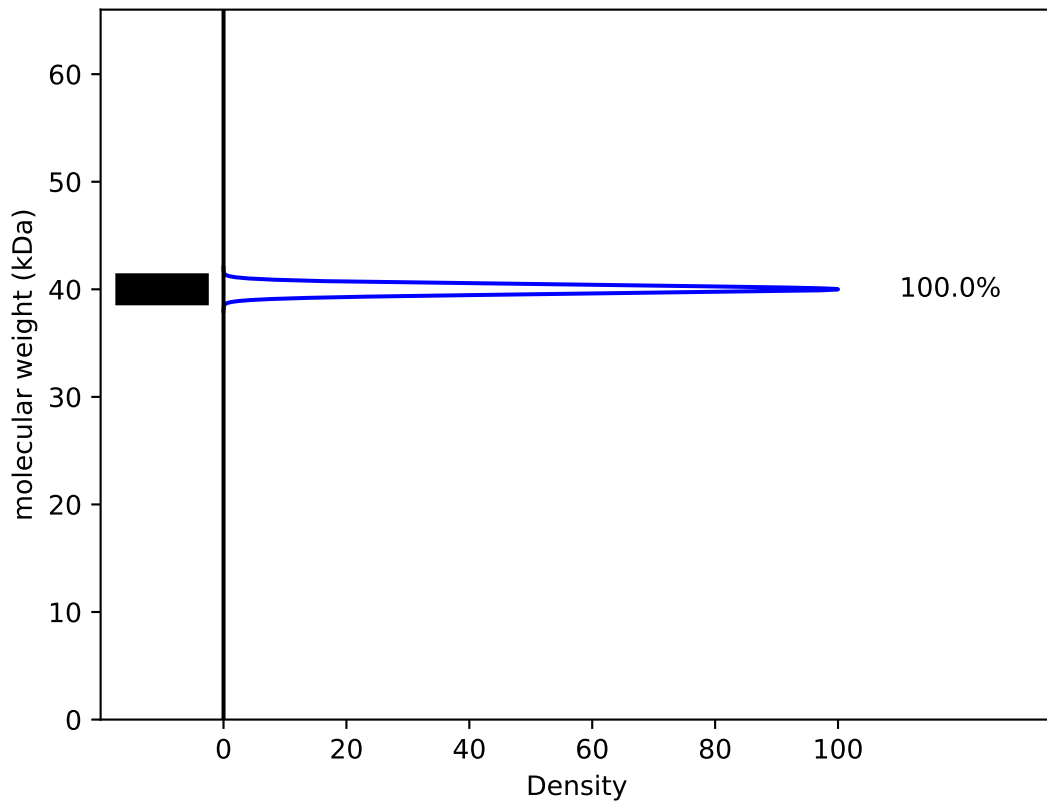

# O15400

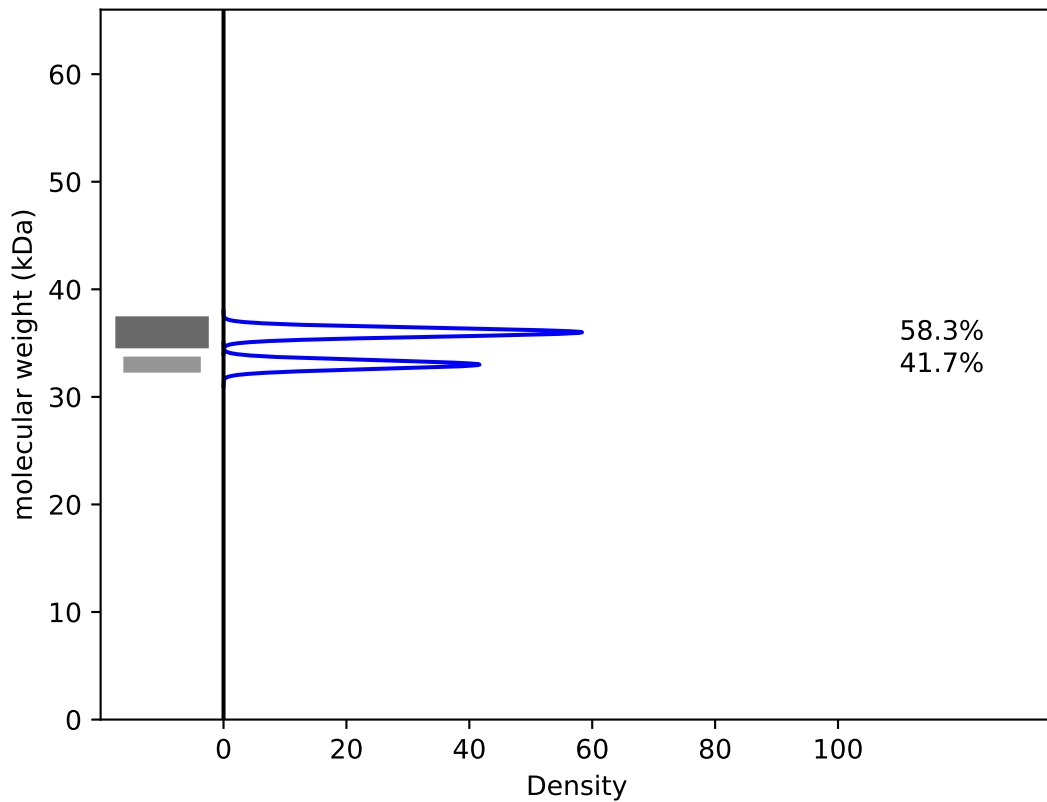

# O15498

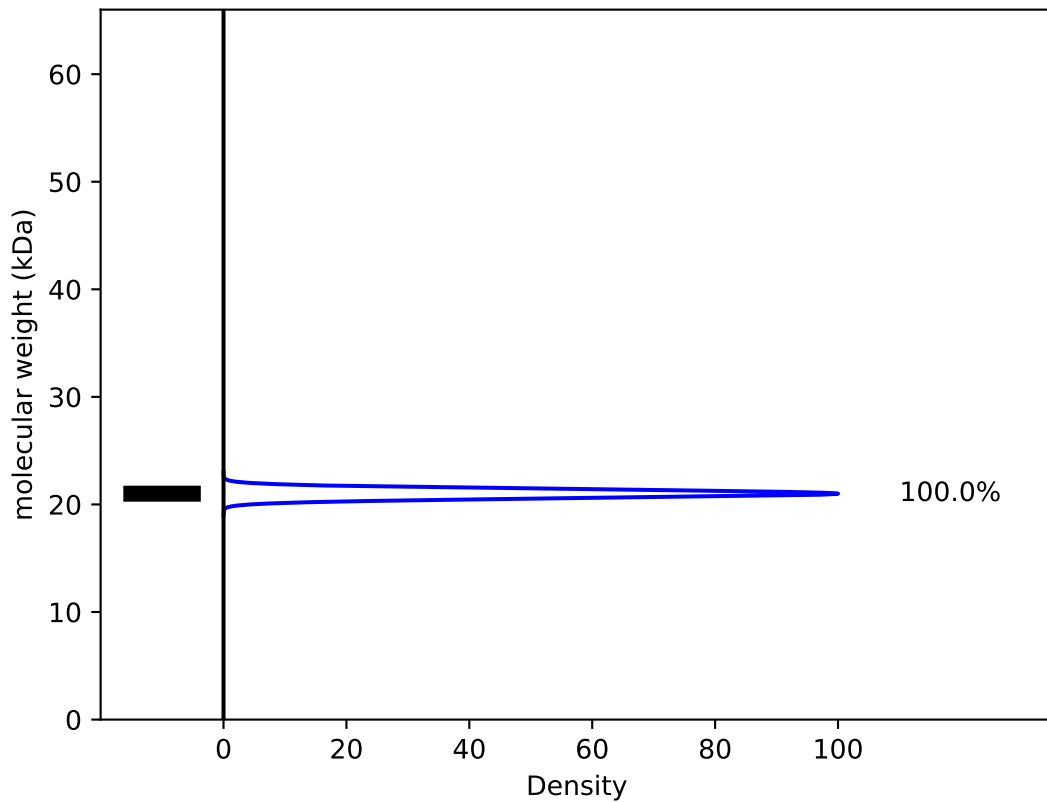

# O15533

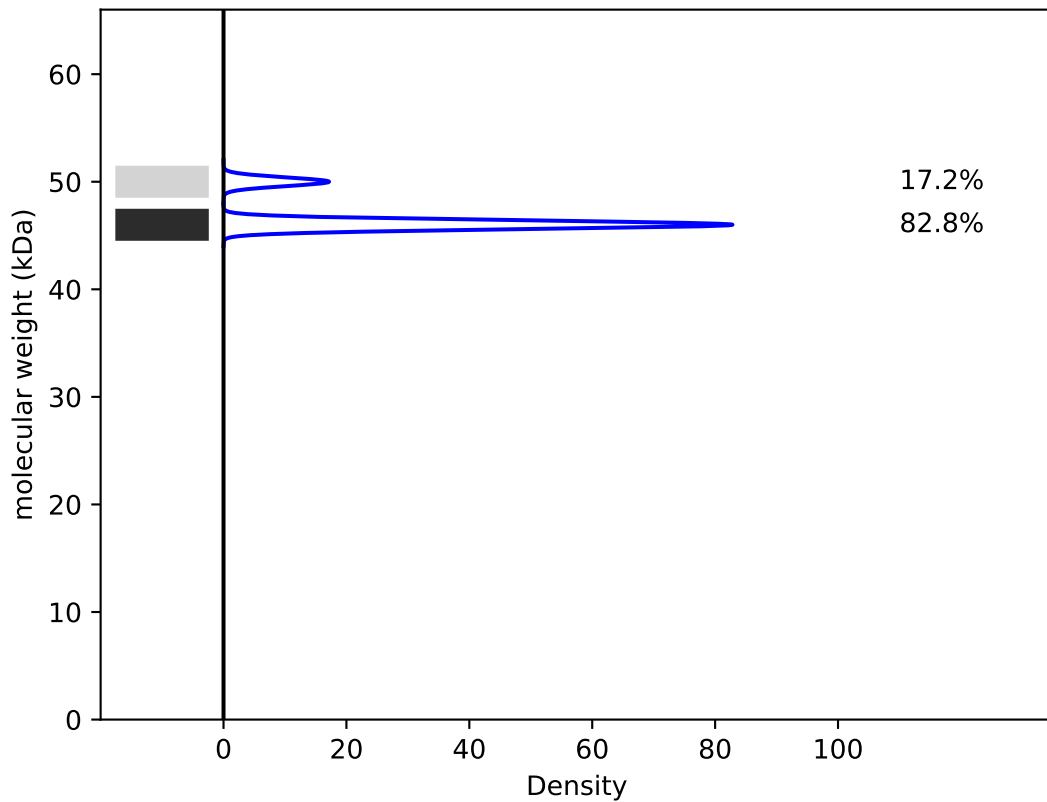

O43148



O43172

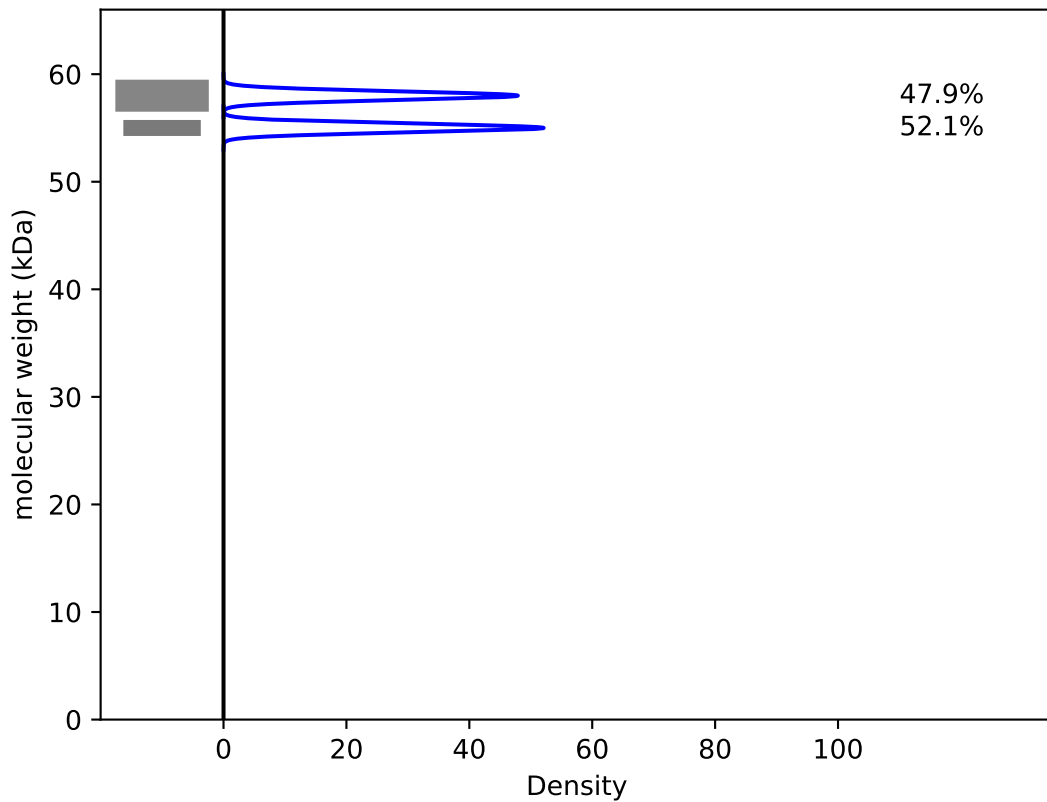

O43175



O43242

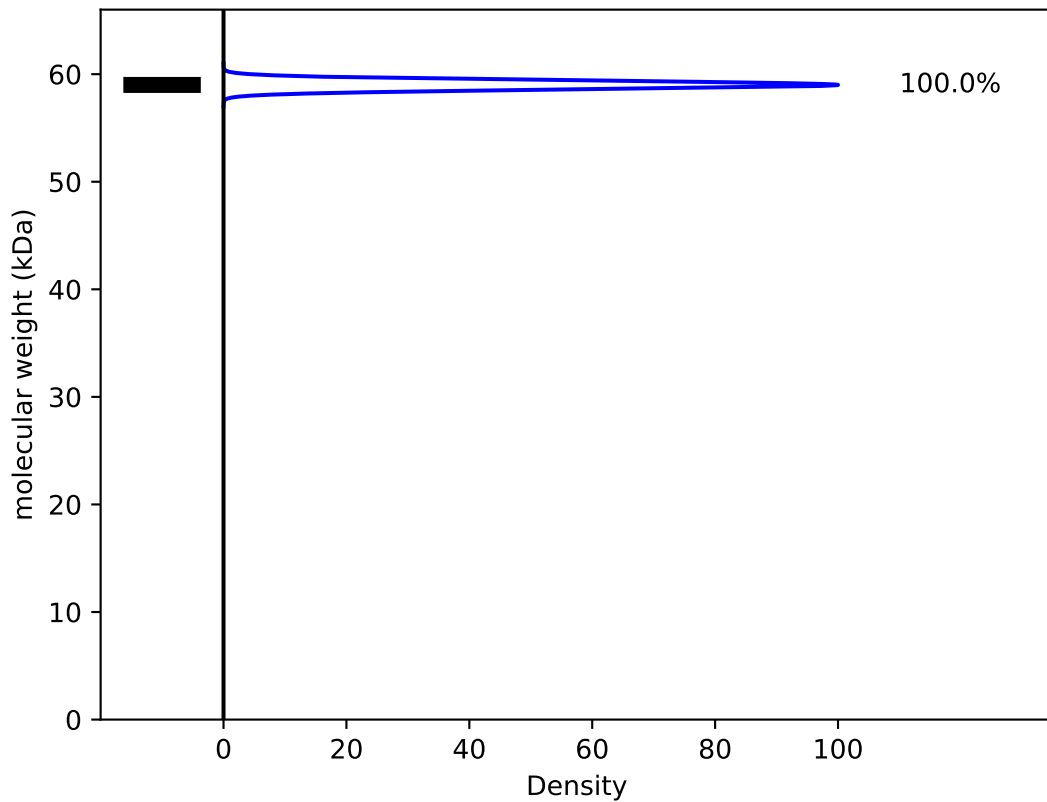



O43324

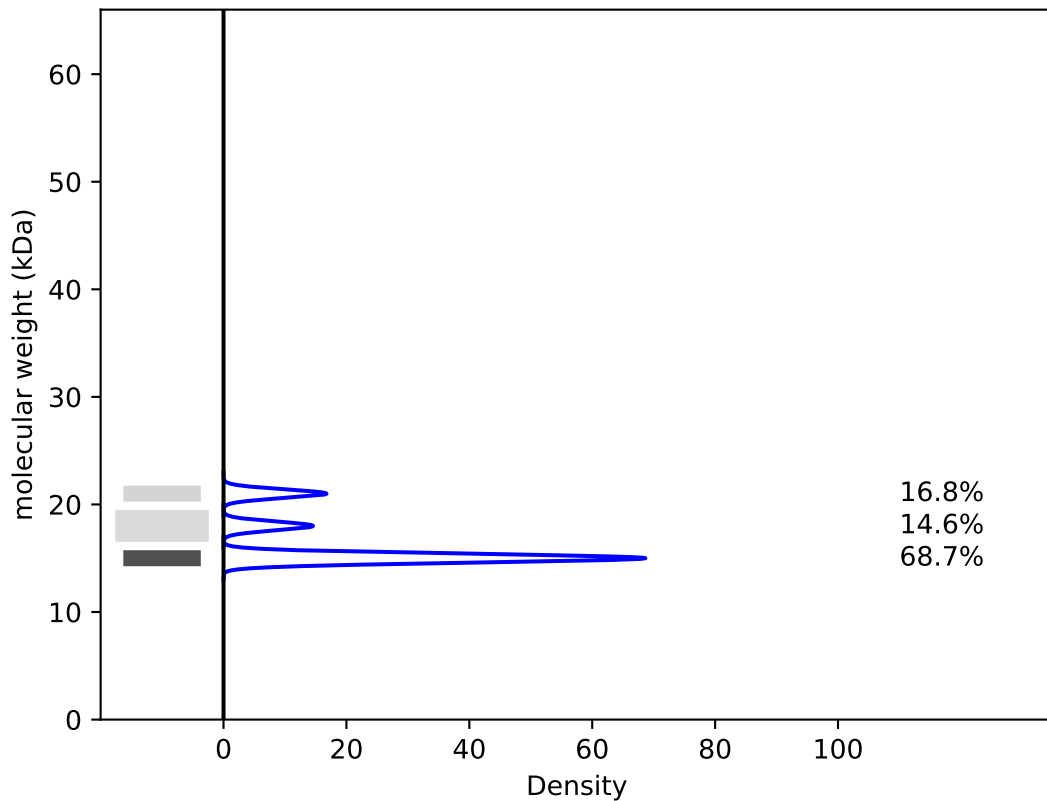

O43396

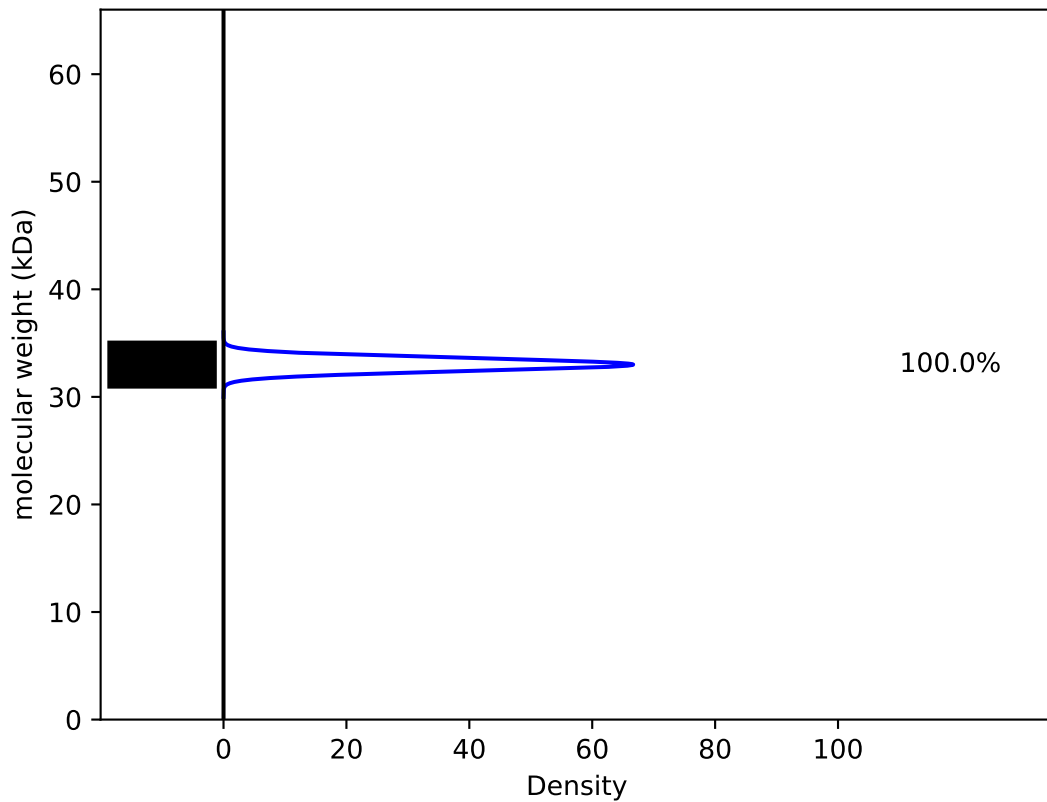

O43399



O43488

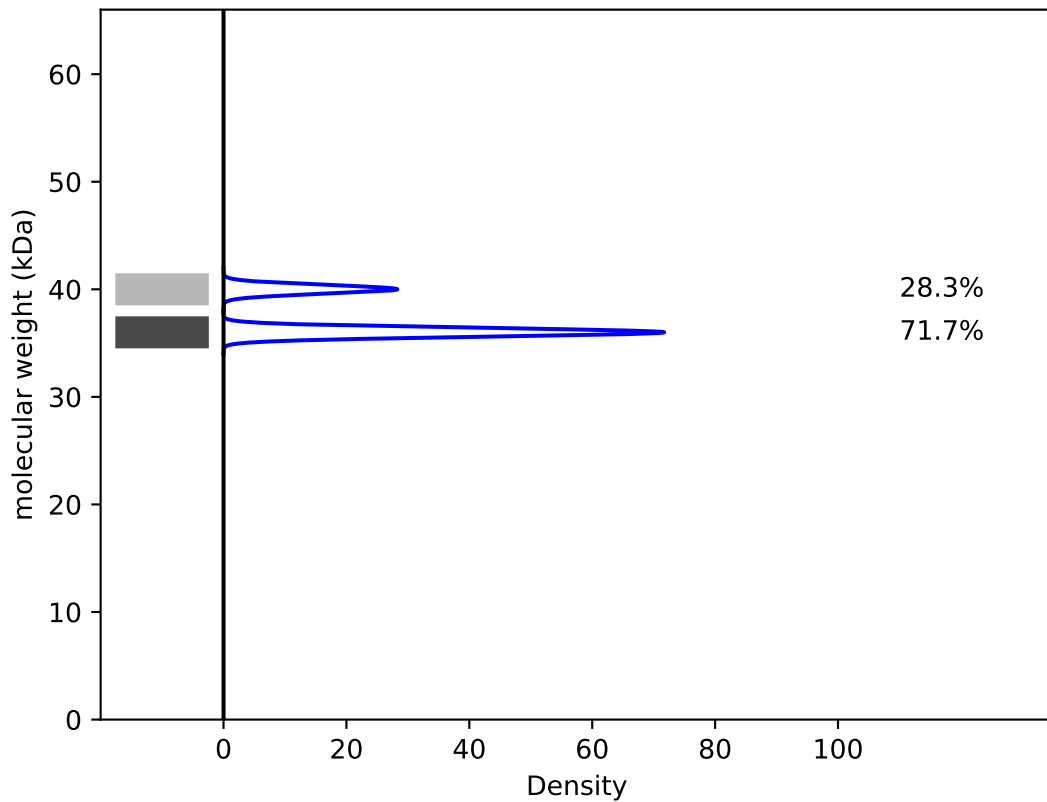

# Q8NHP1

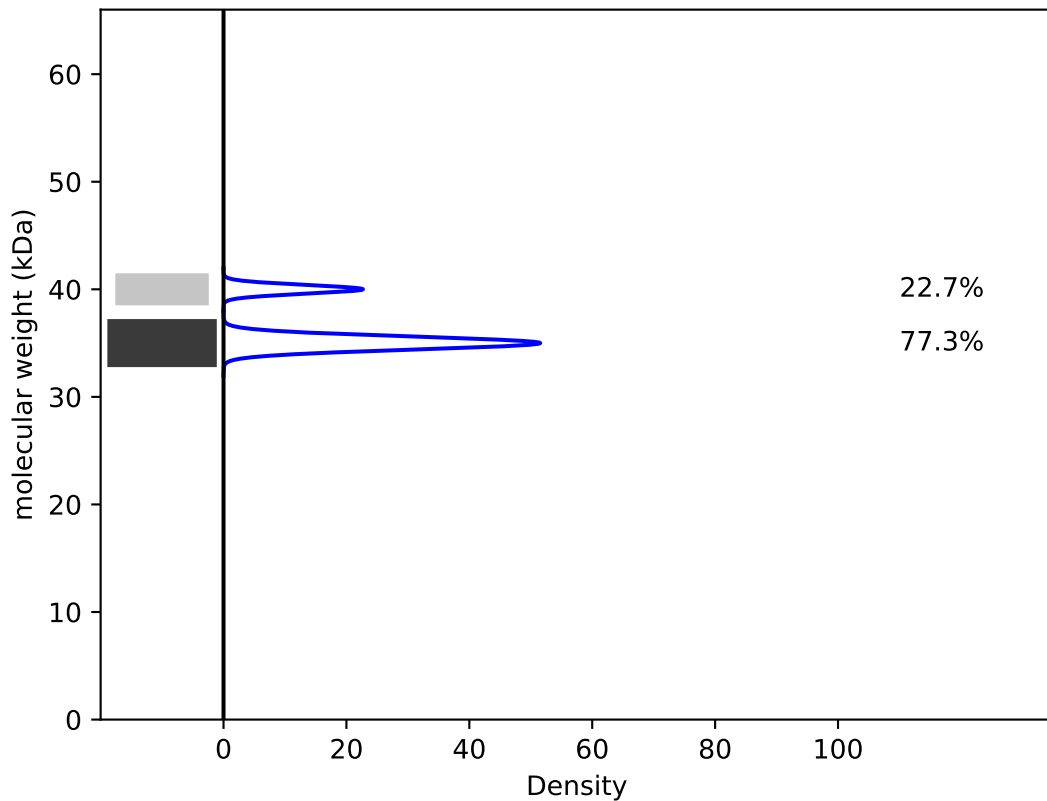

O43598

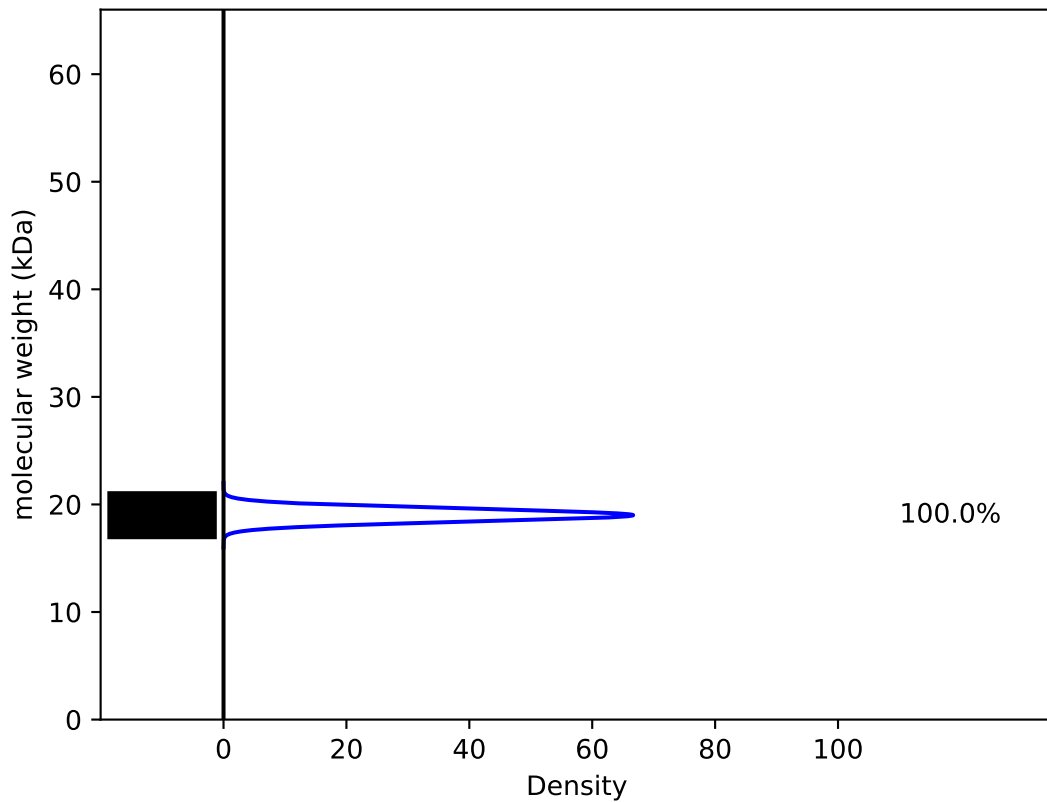

O43660



O43681

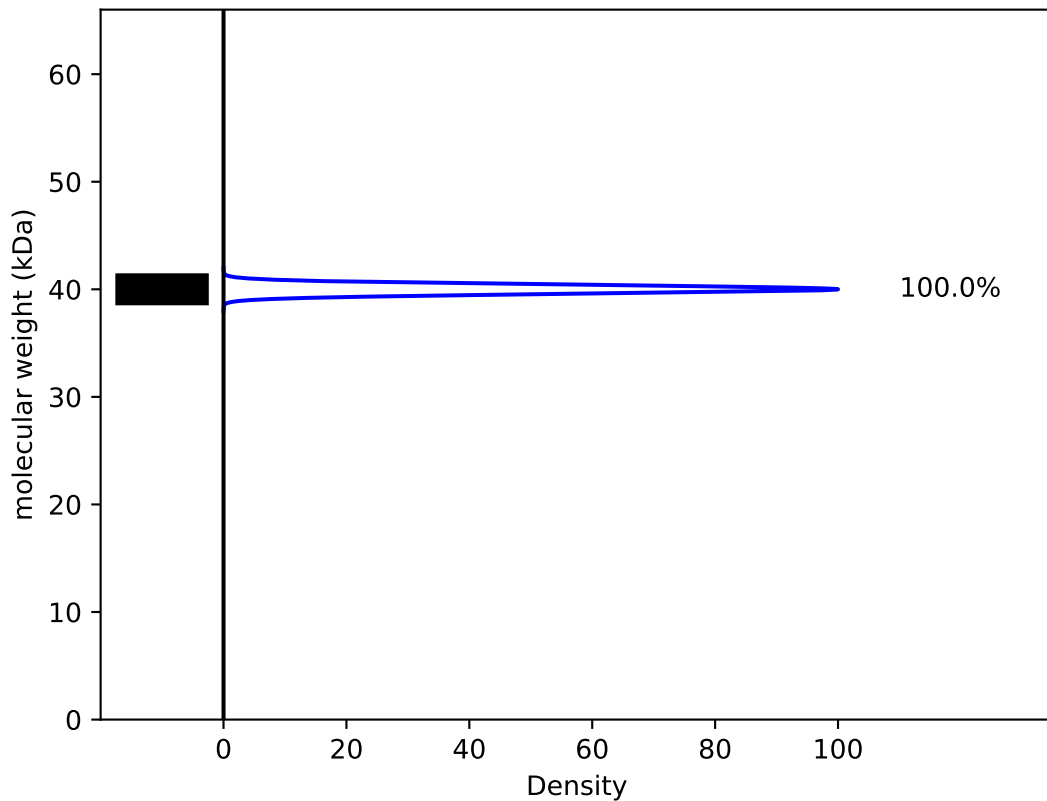



O43684

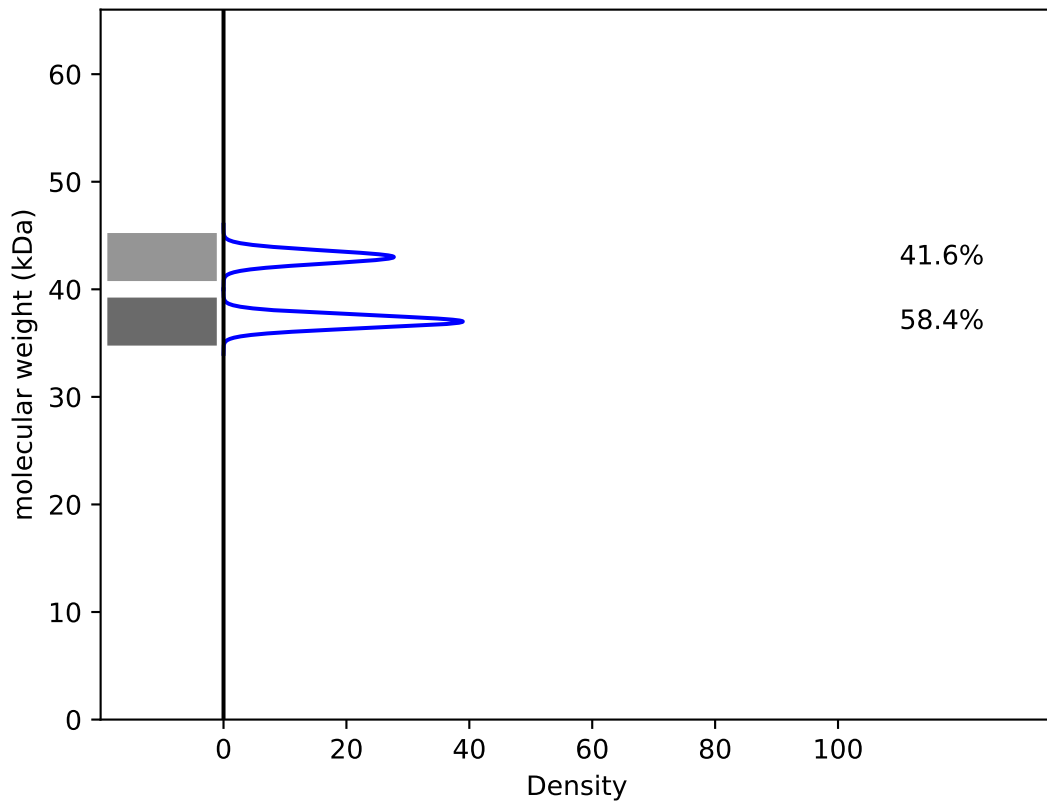

O43809

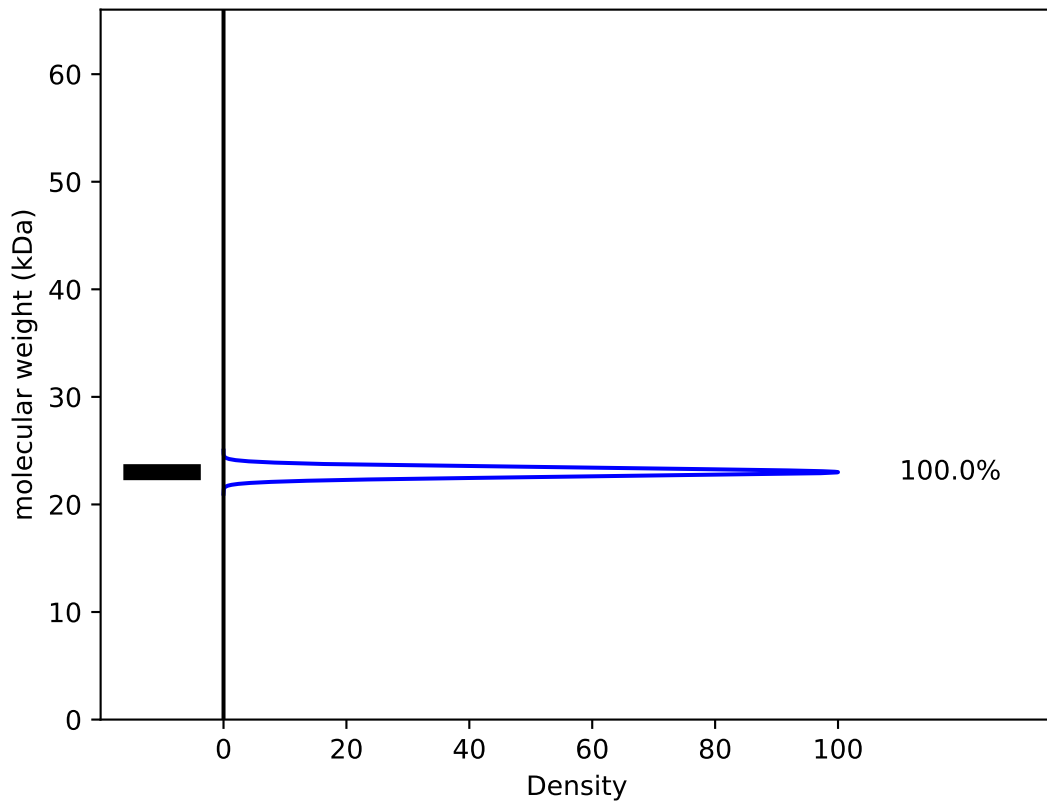

O43813

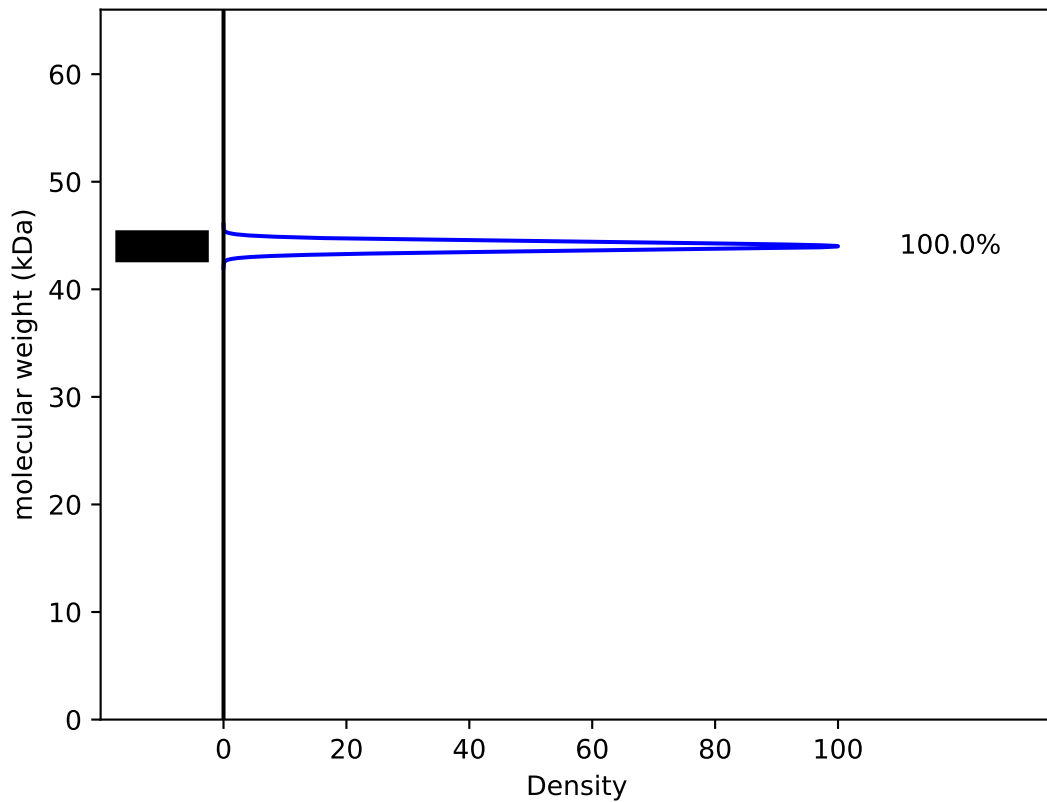

O43818

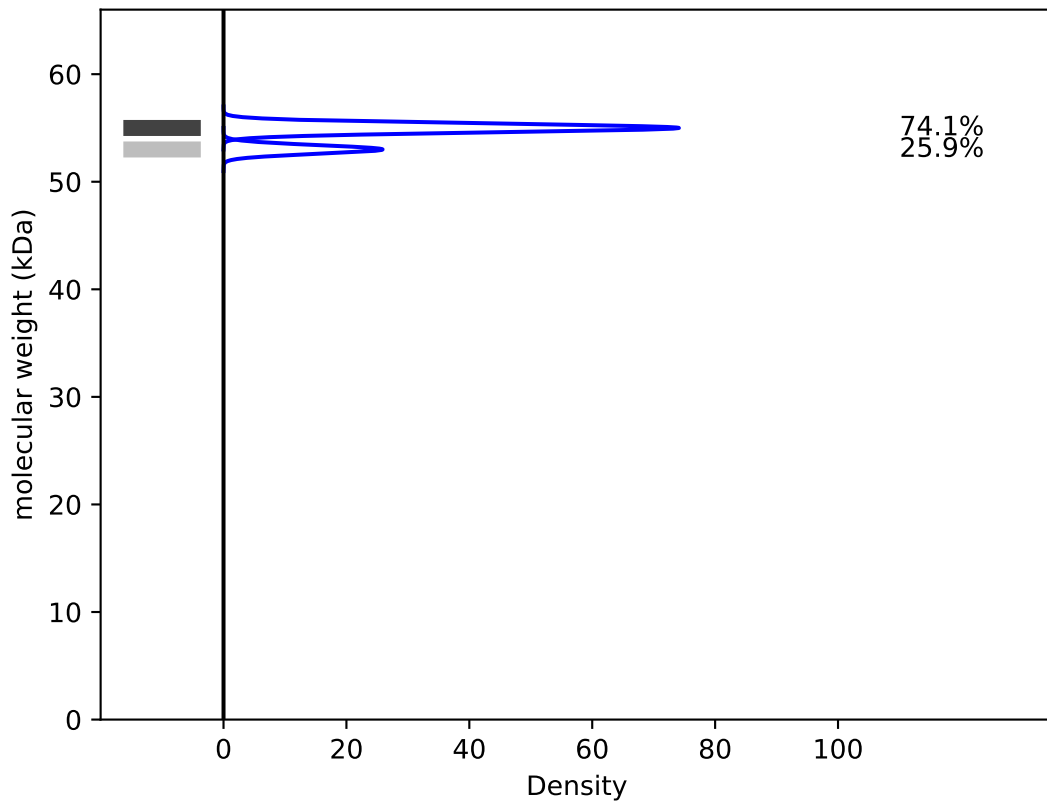

O43837

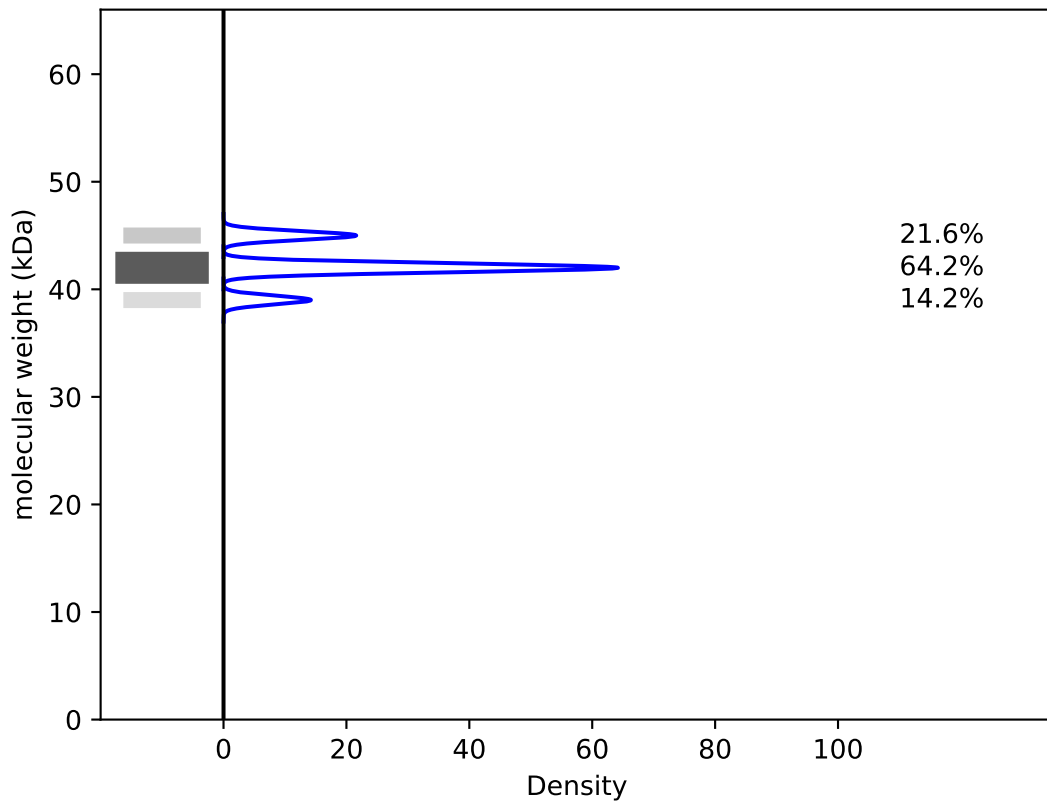

O43865

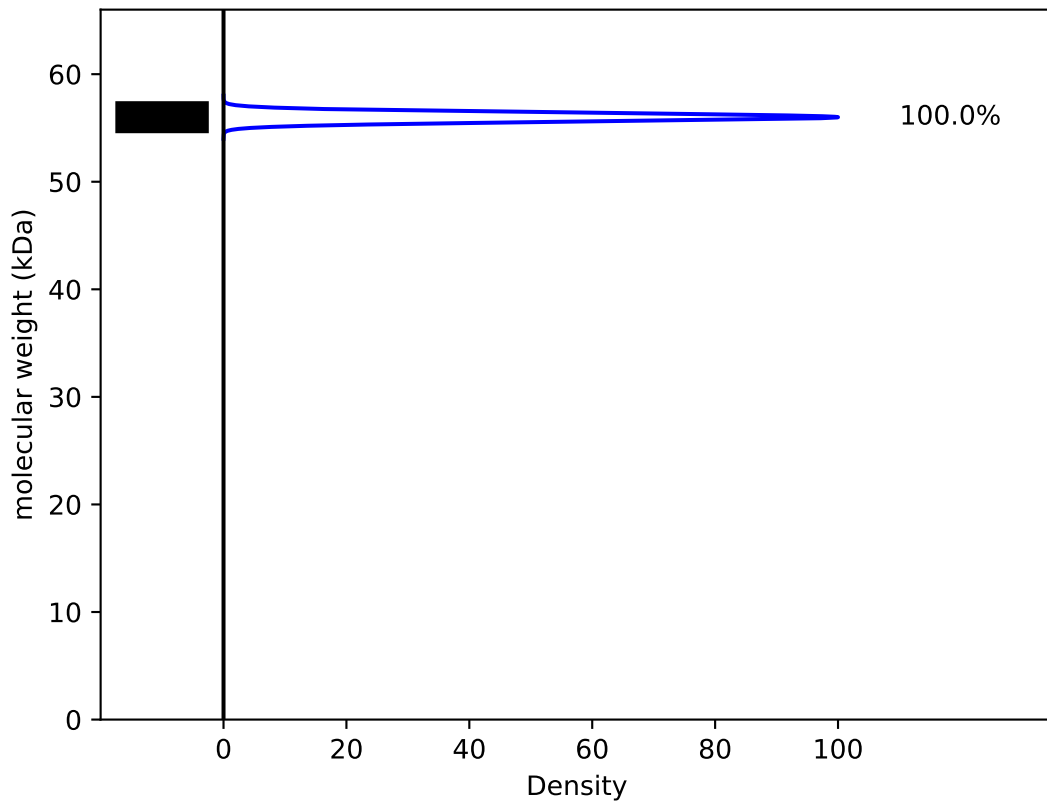

# O60256

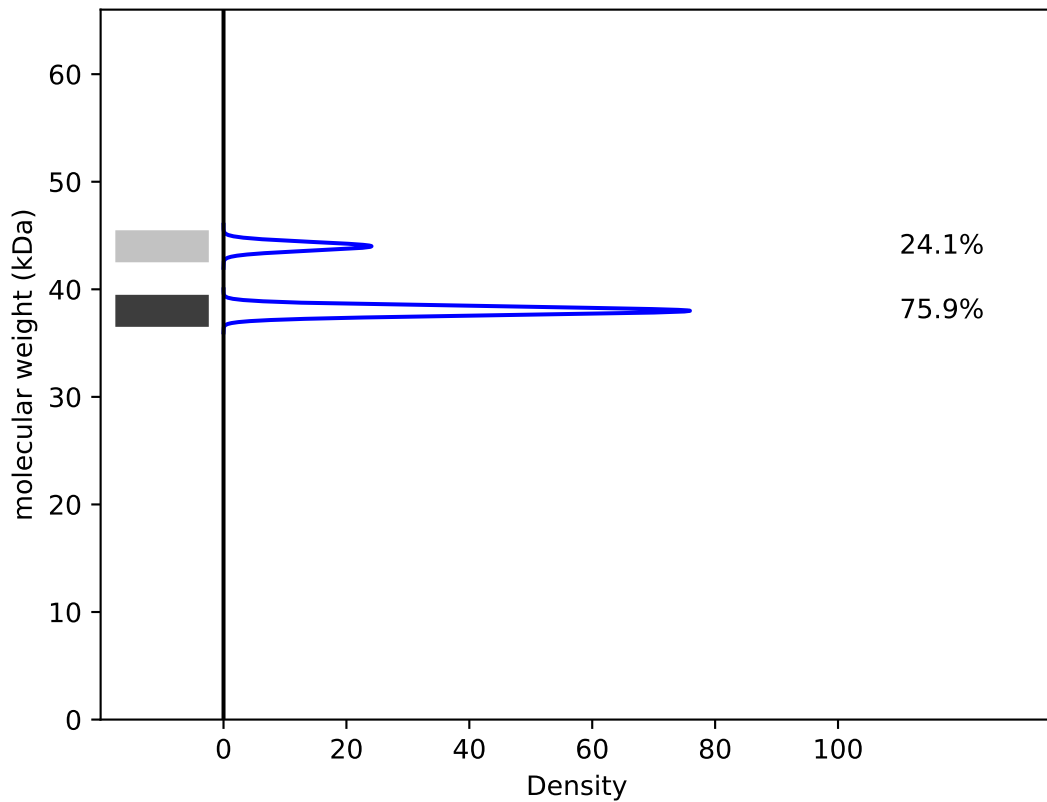

O60547

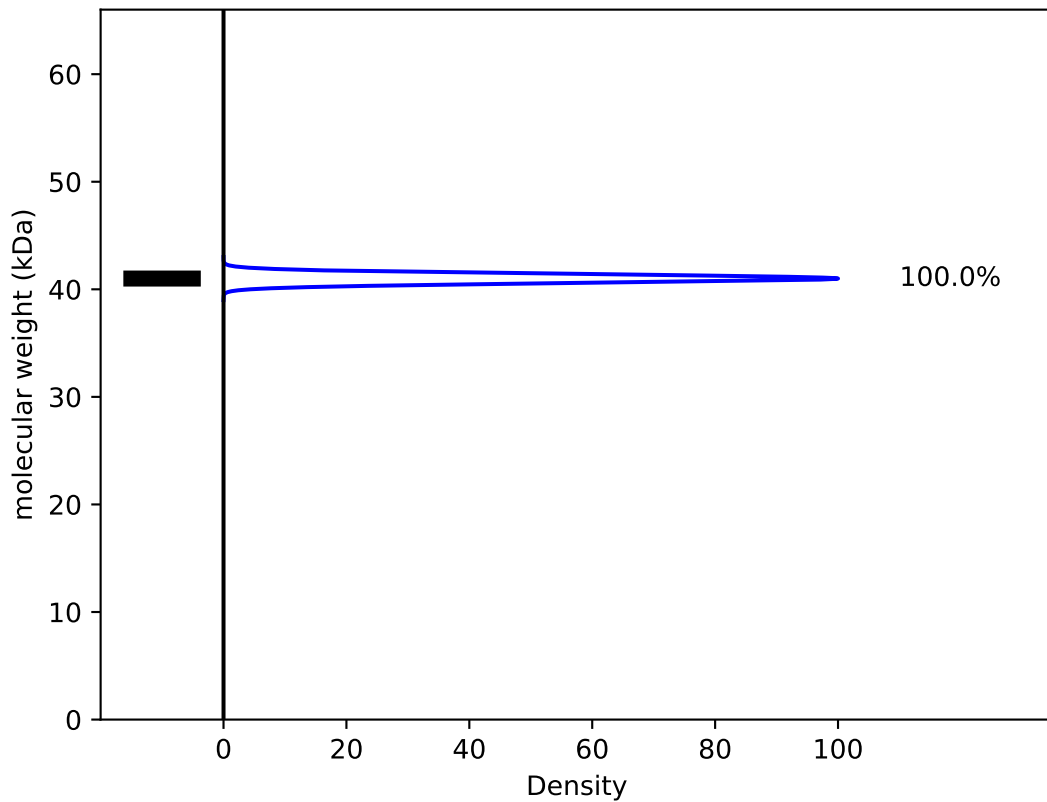



O60573

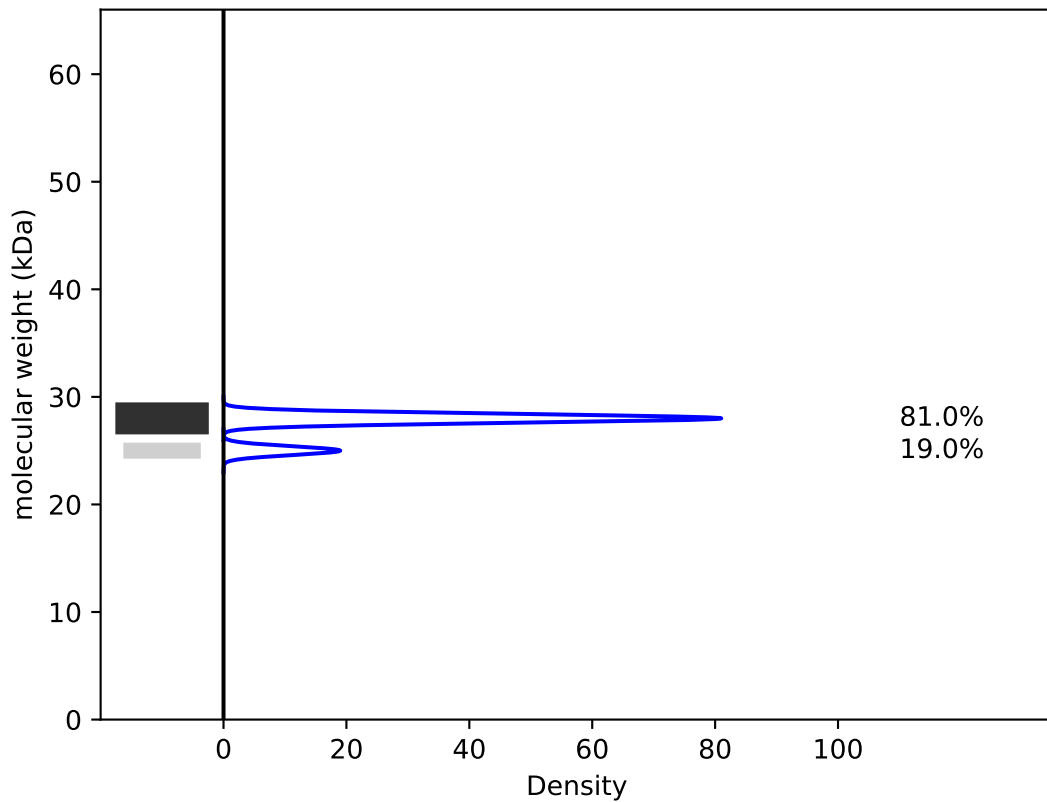

# O60664

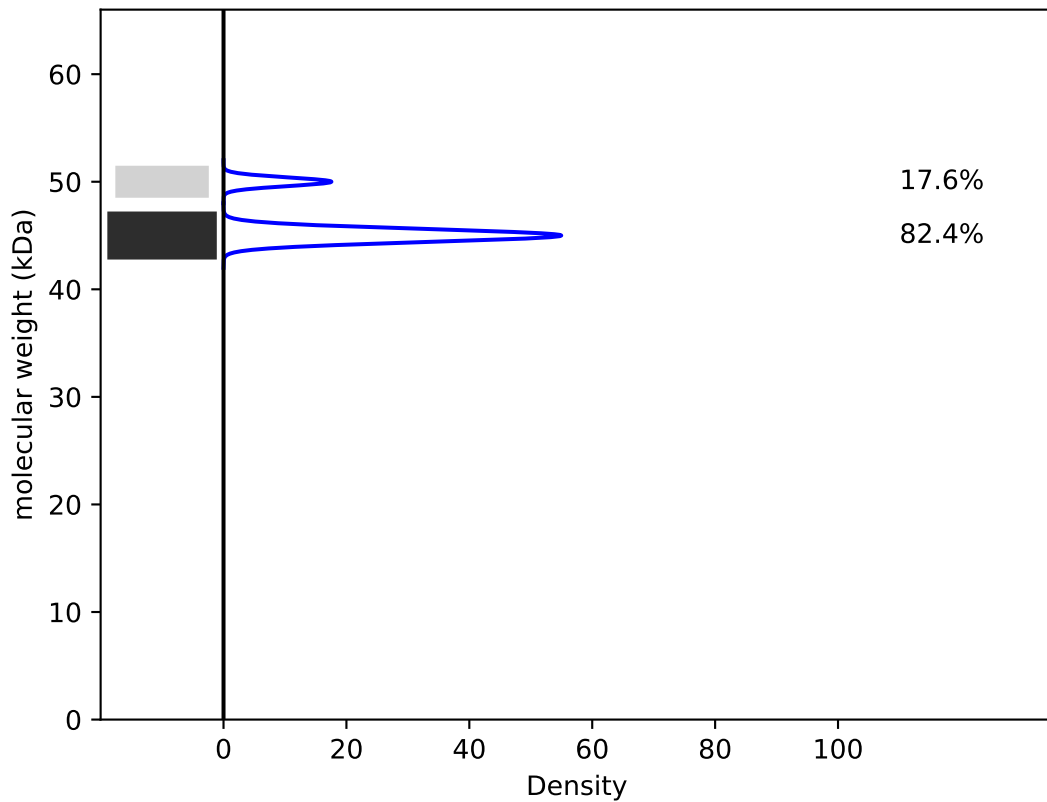

O60684

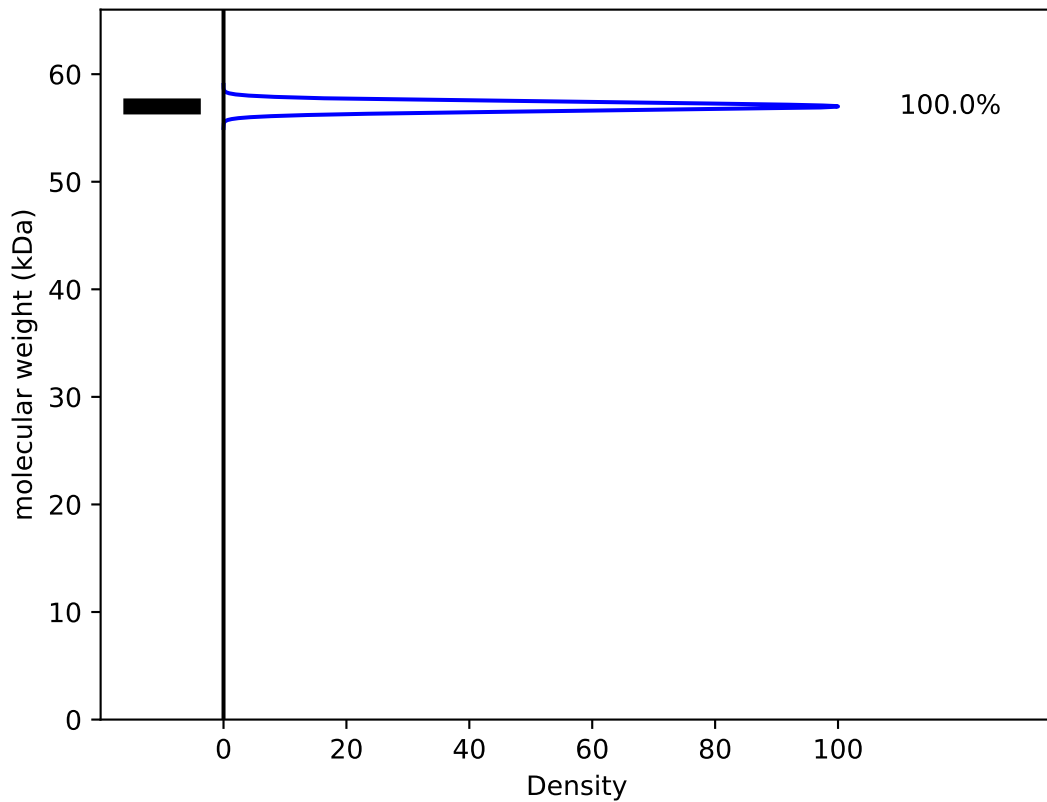

# O15131



O60701

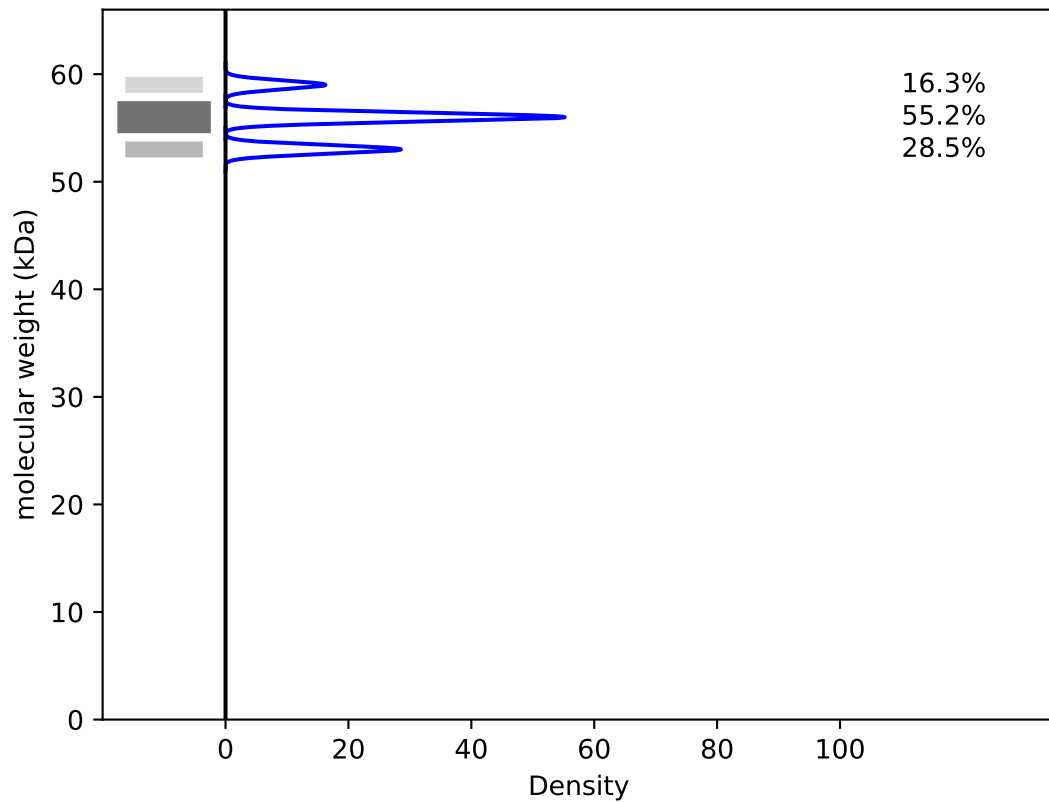

O60762

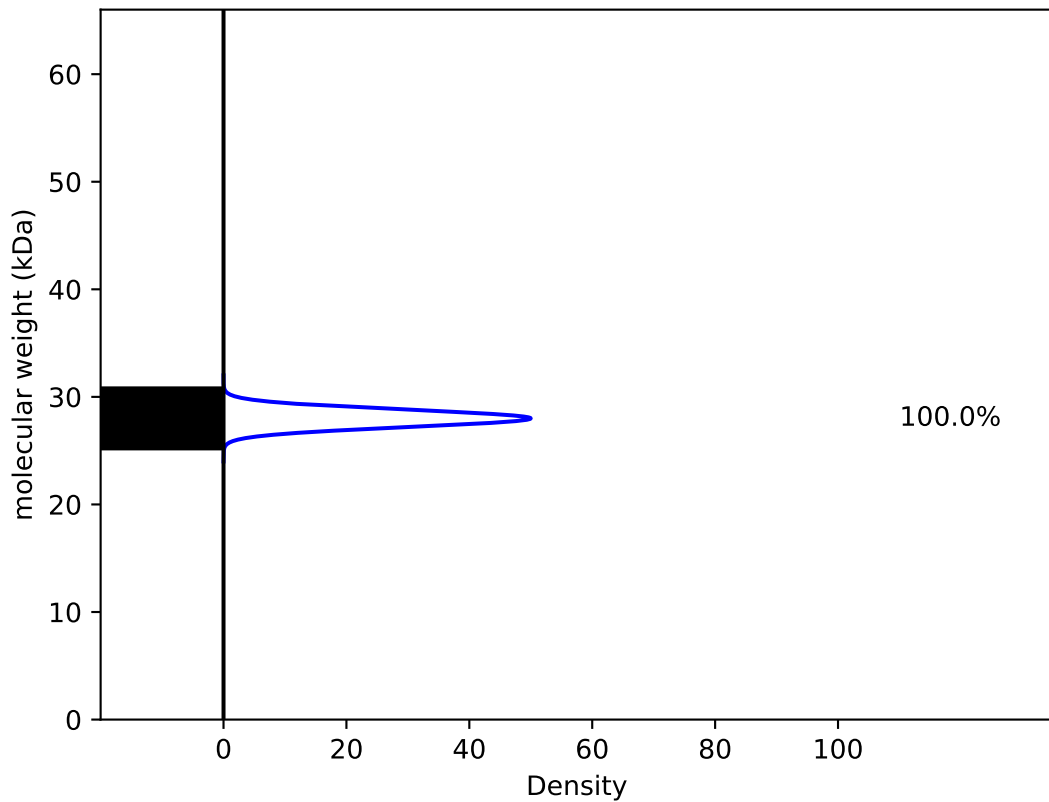

# Q99880

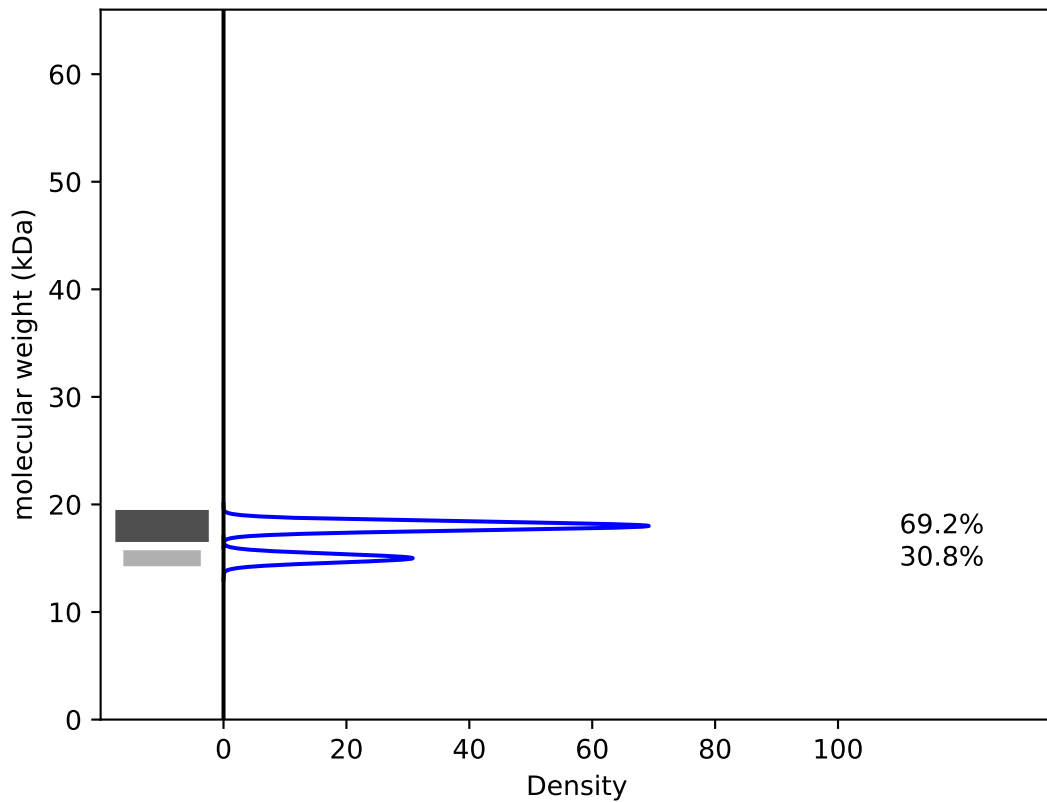

# Q99879

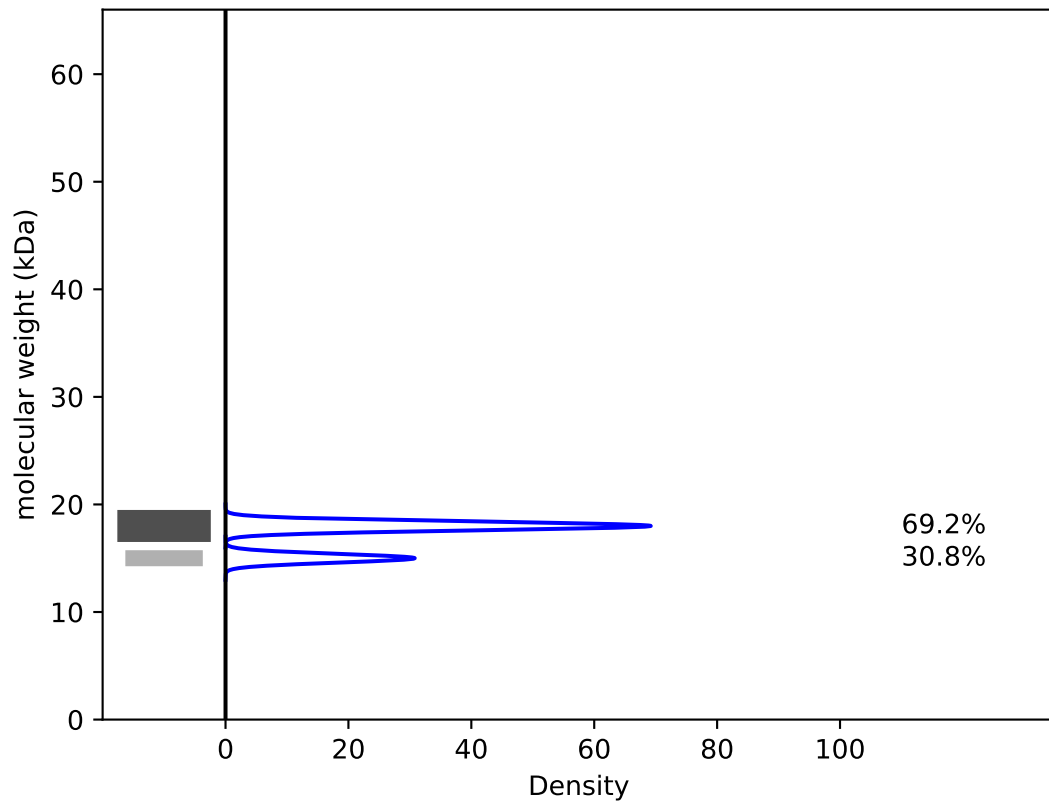



Q99877



# Q93079

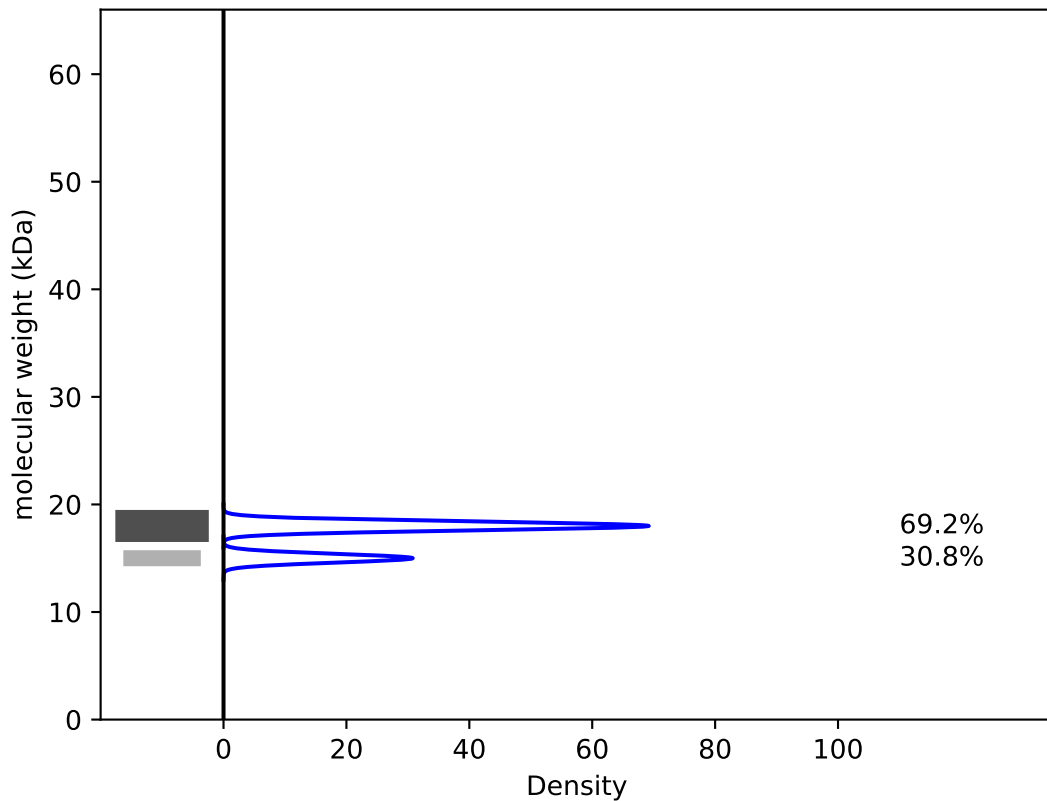

# Q5QNW6



# P62807

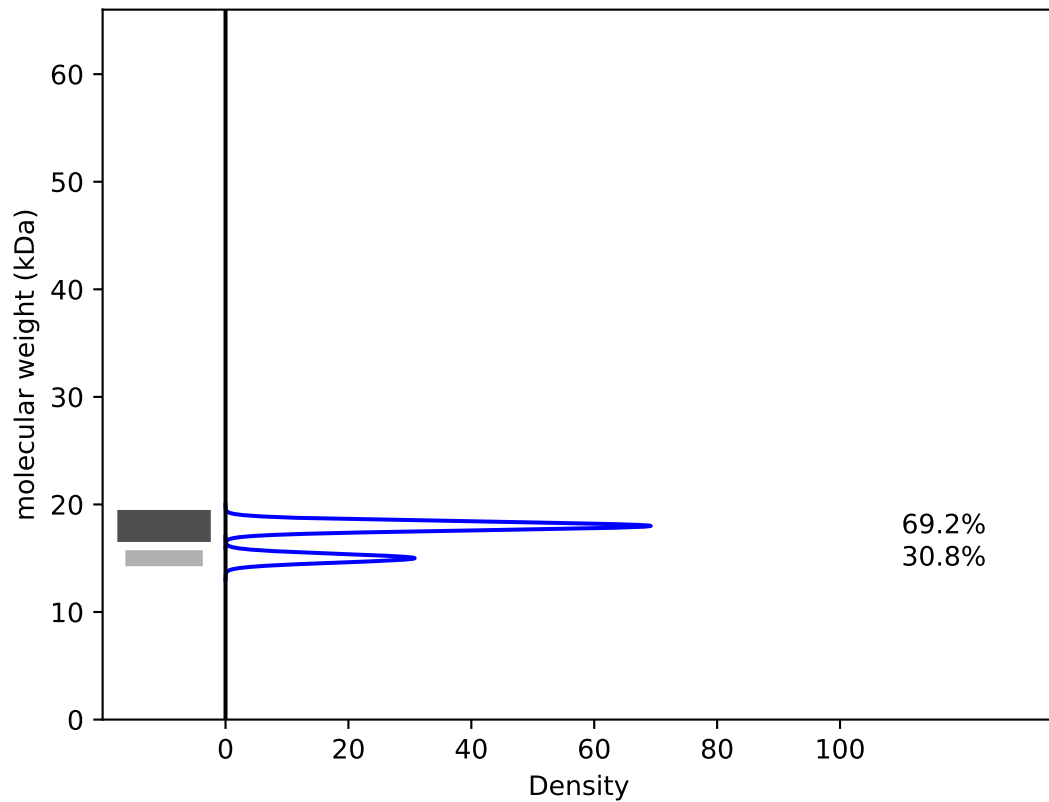

# P58876



# P57053



# O60814



# Q16778





P33778



P23527

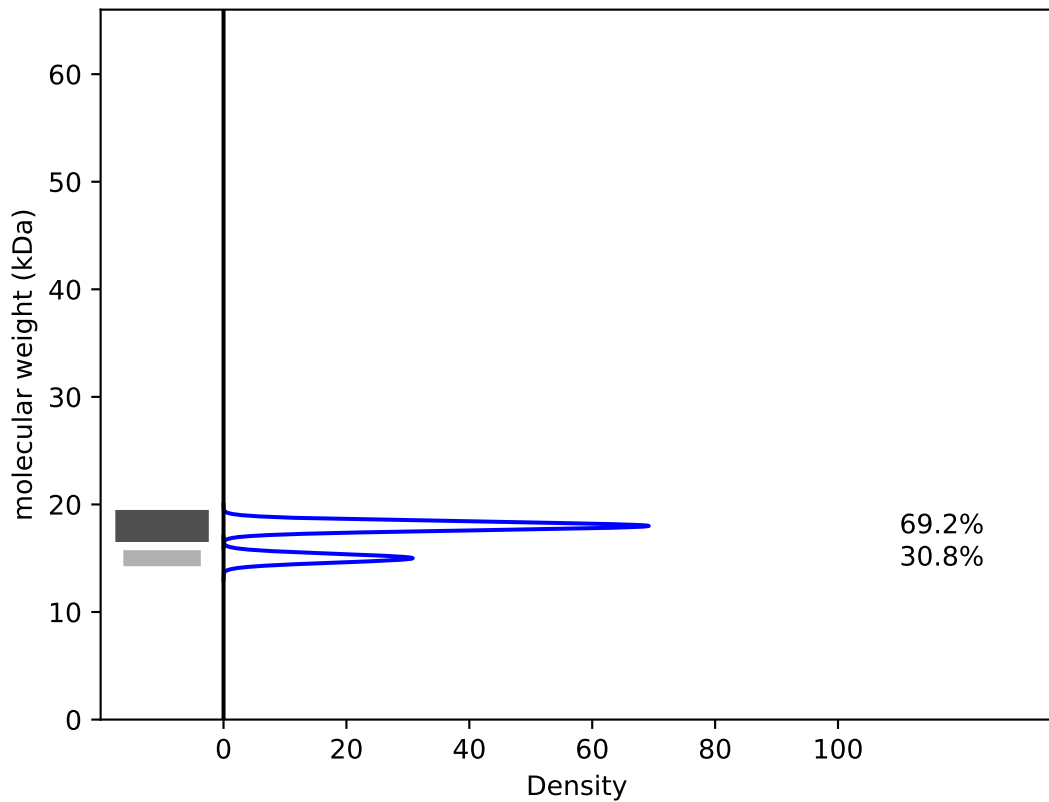

P06899

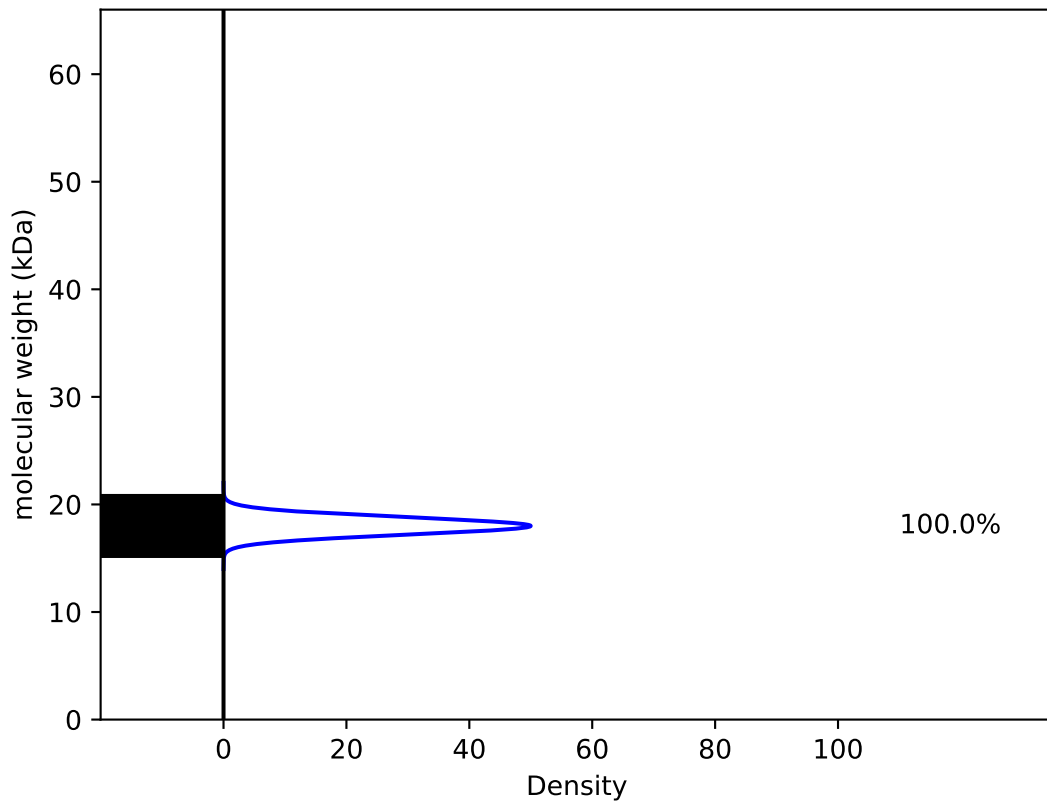

# Q8N257



# Q96A08



O60828

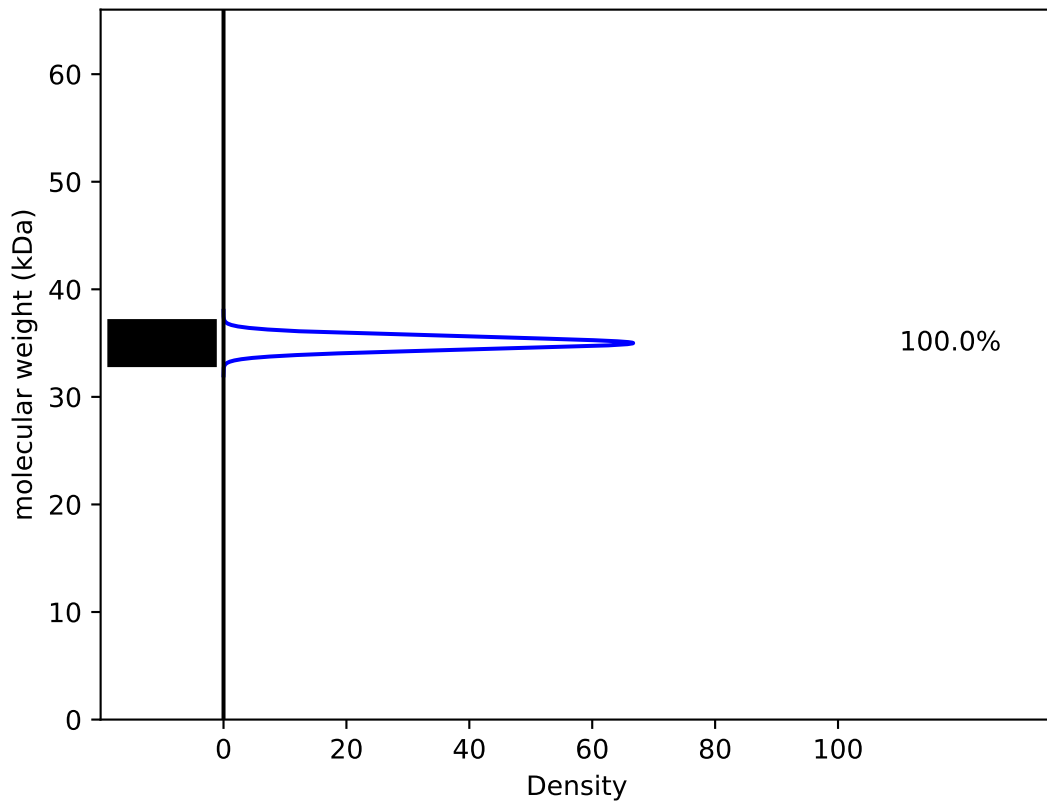

O60832

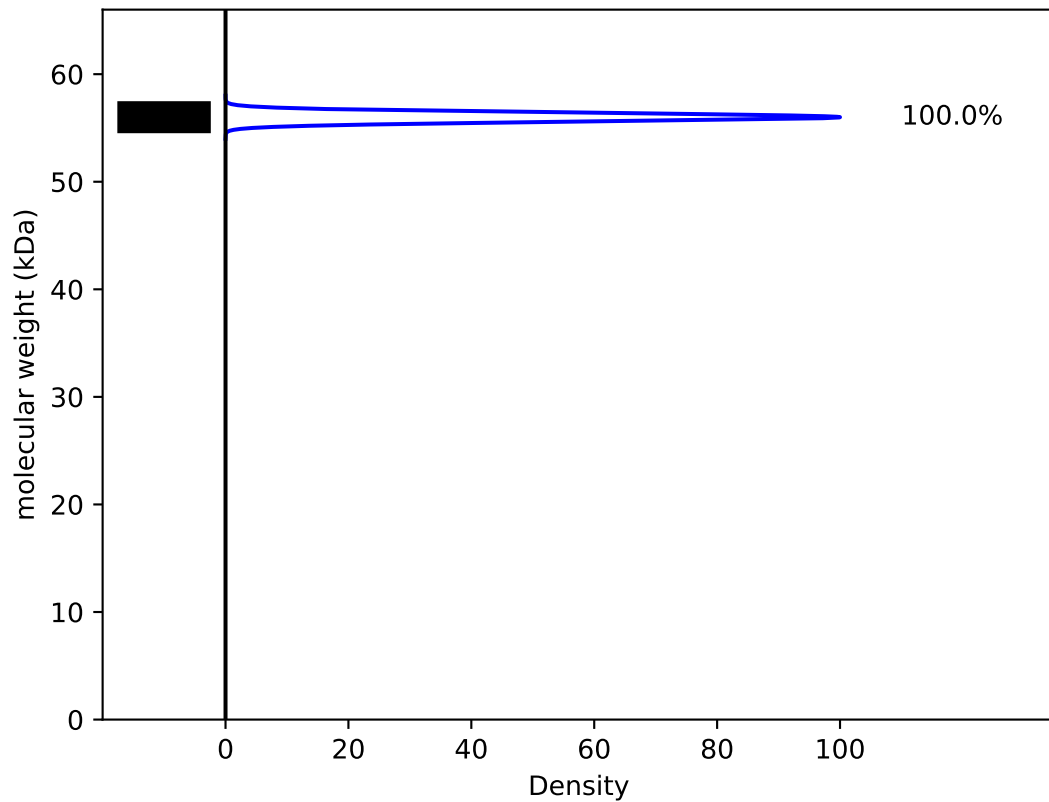

O60884

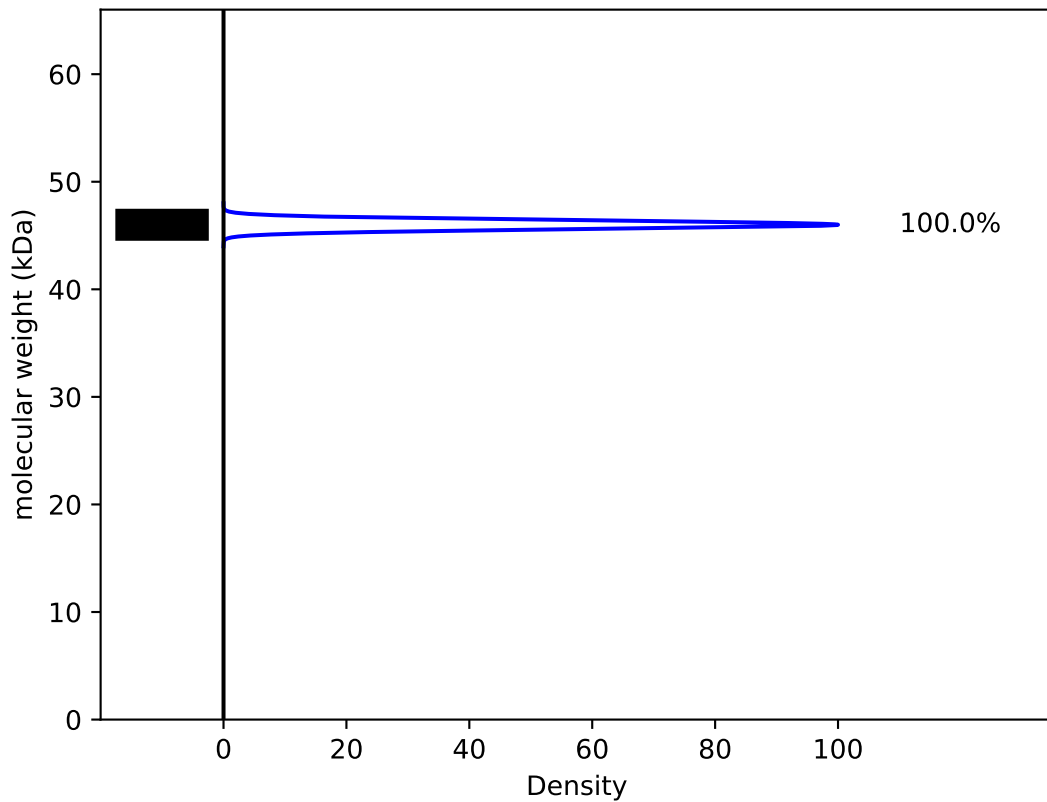



O75131

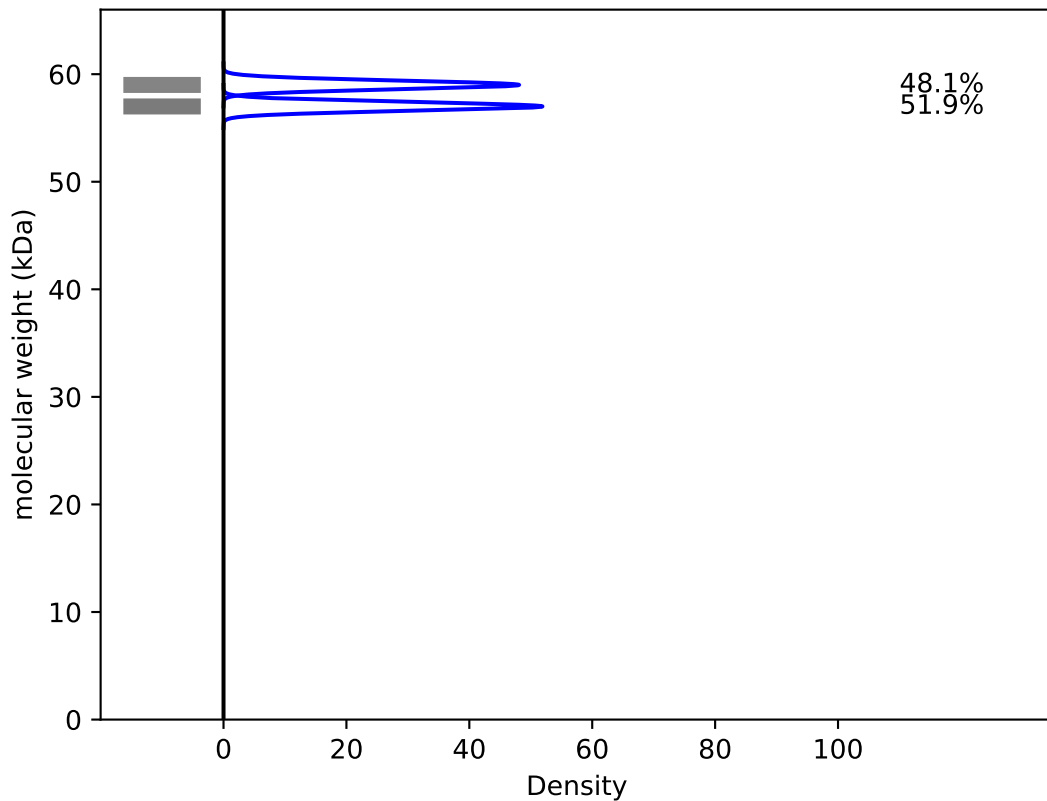

# Q96FN4



# Q8IYJ1

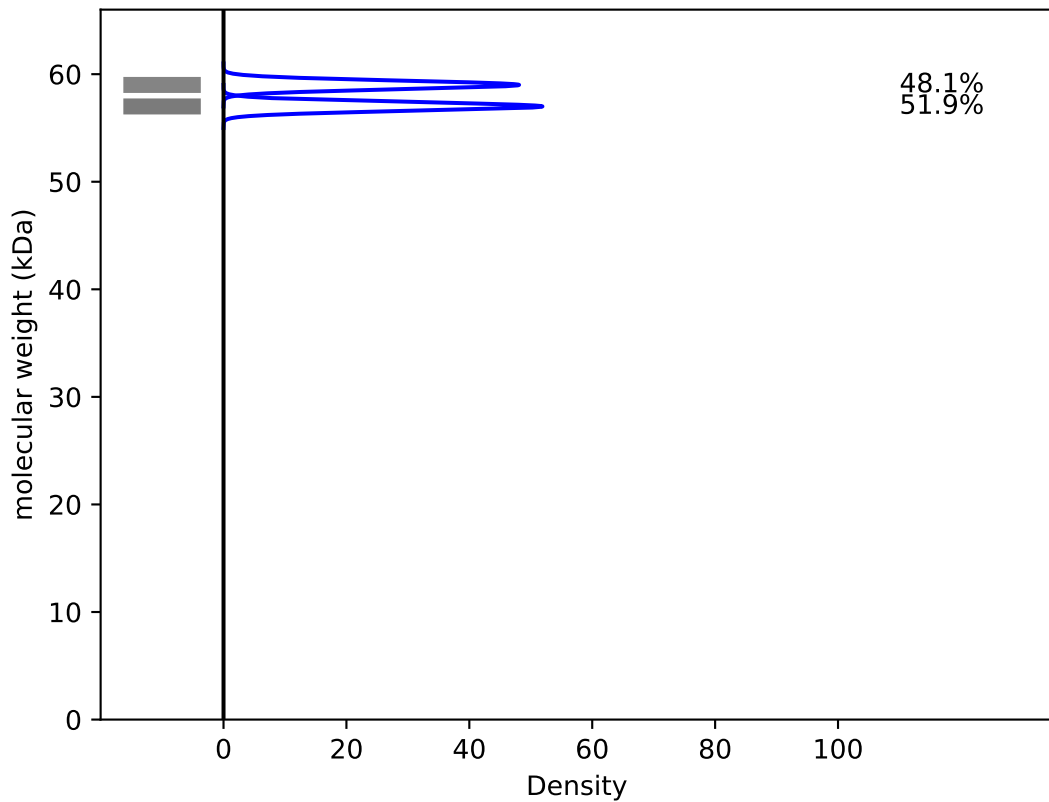

O95741

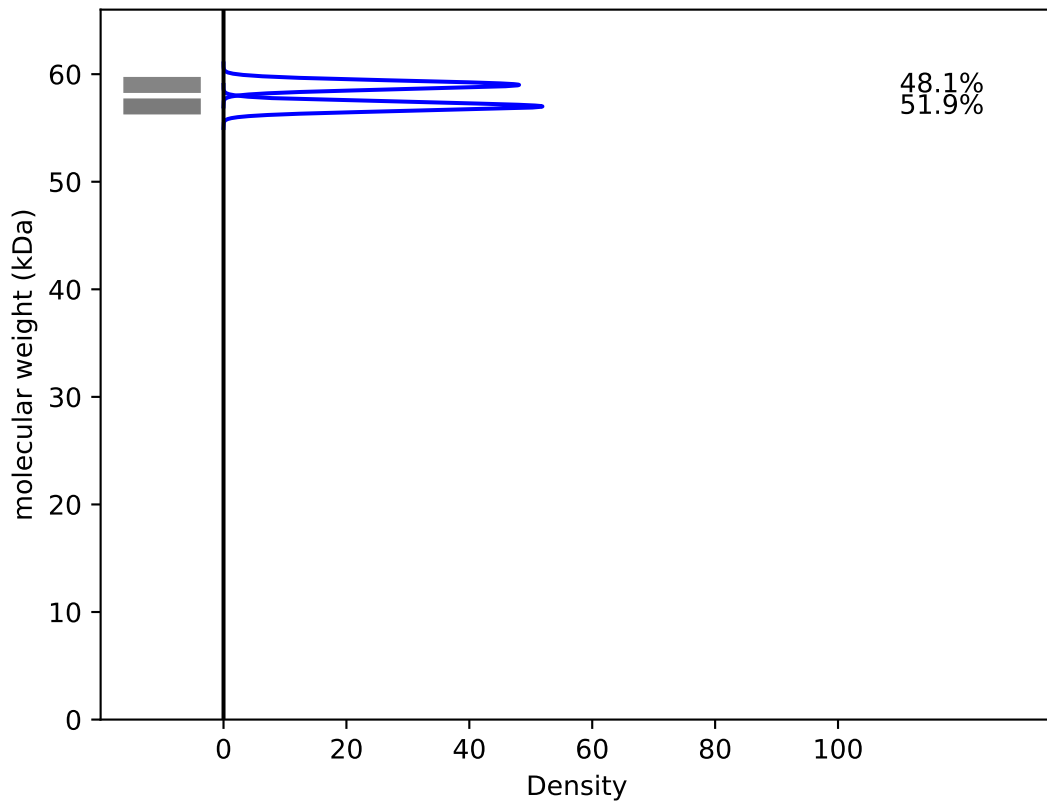

O75208



O75223

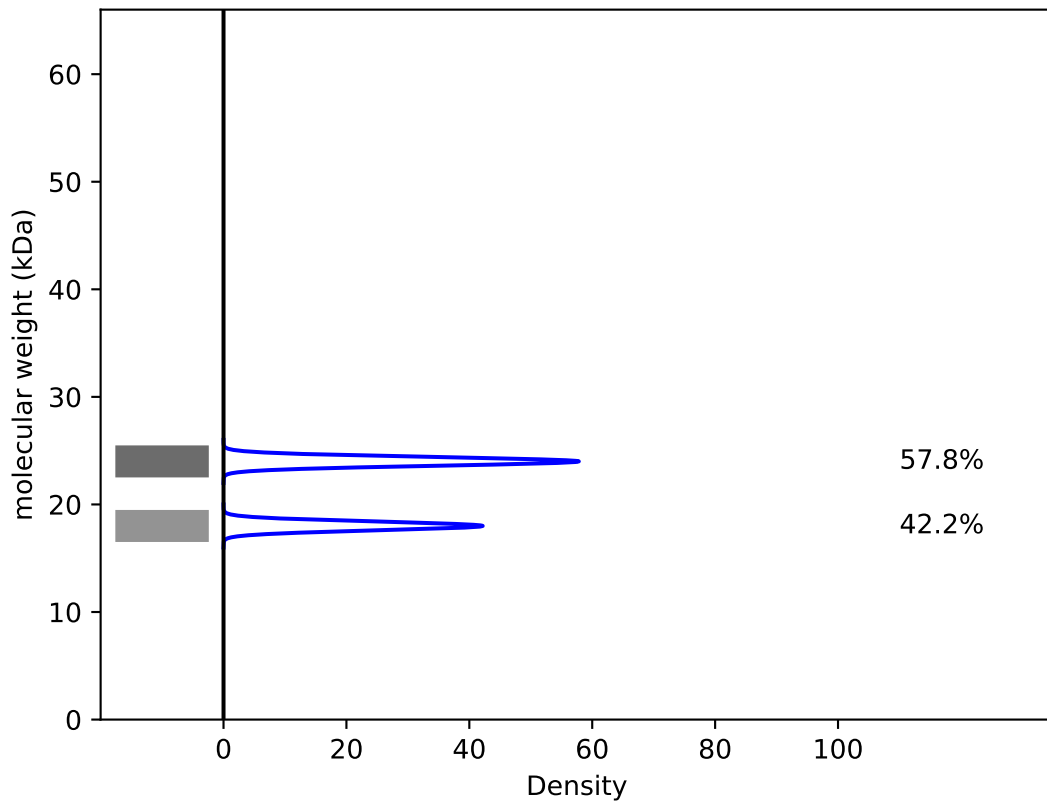

O75340

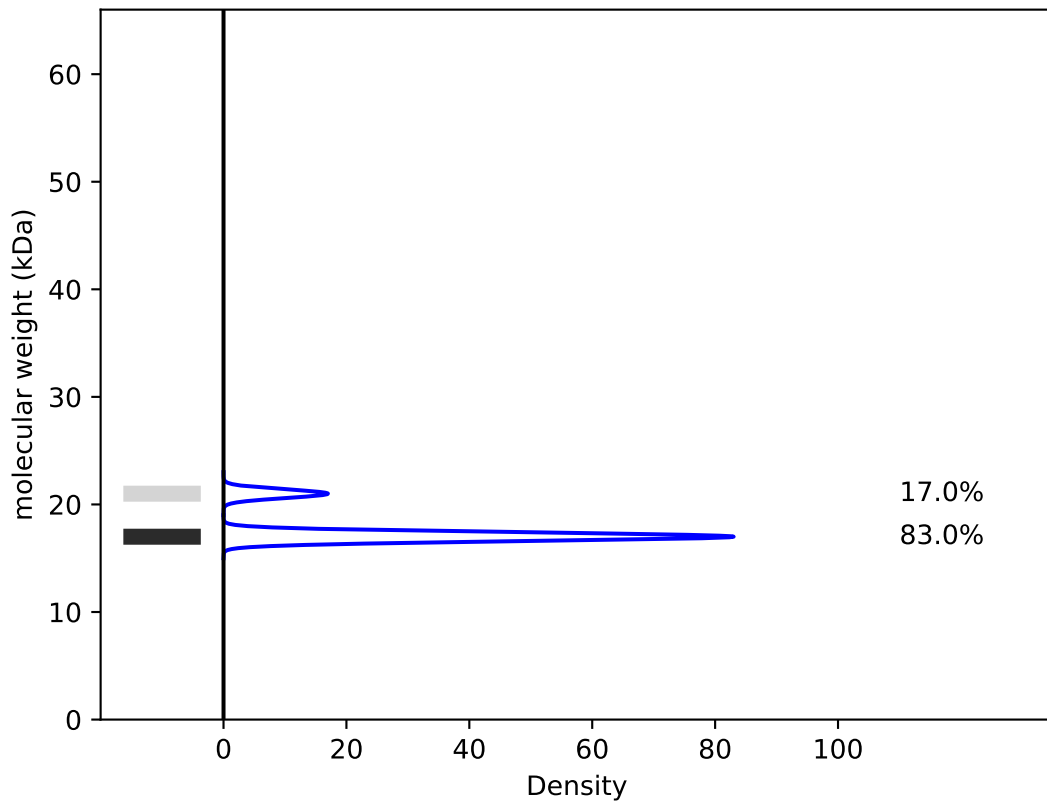

O75367

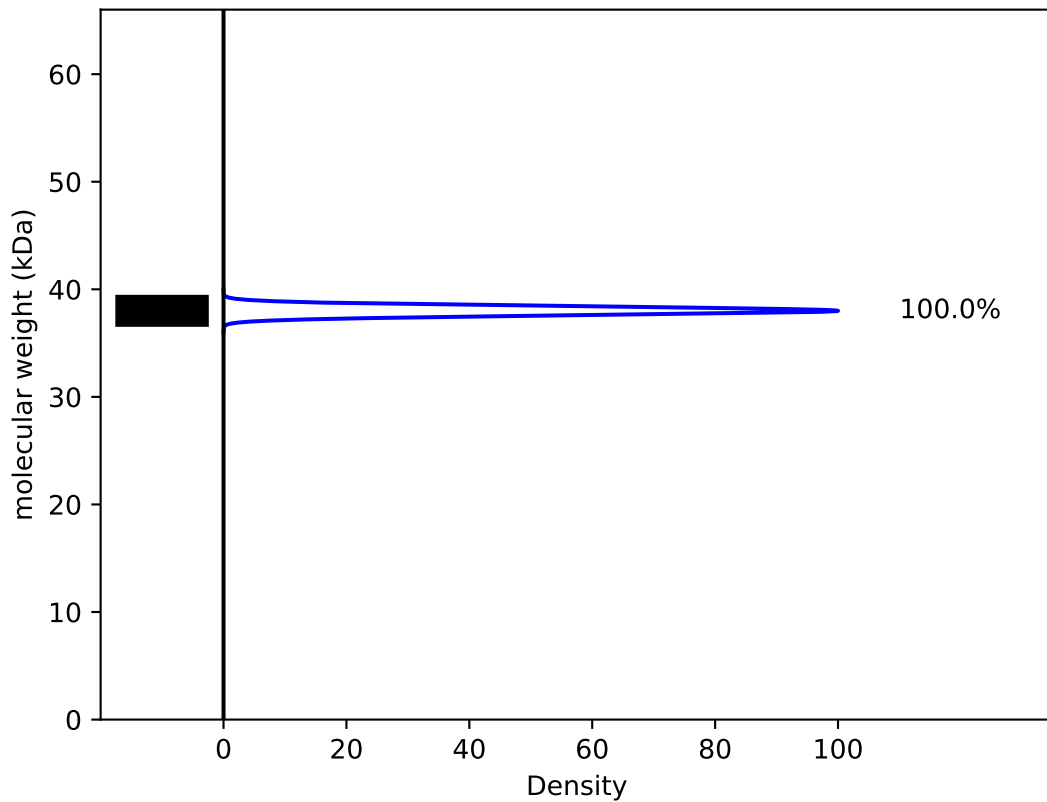



O75396

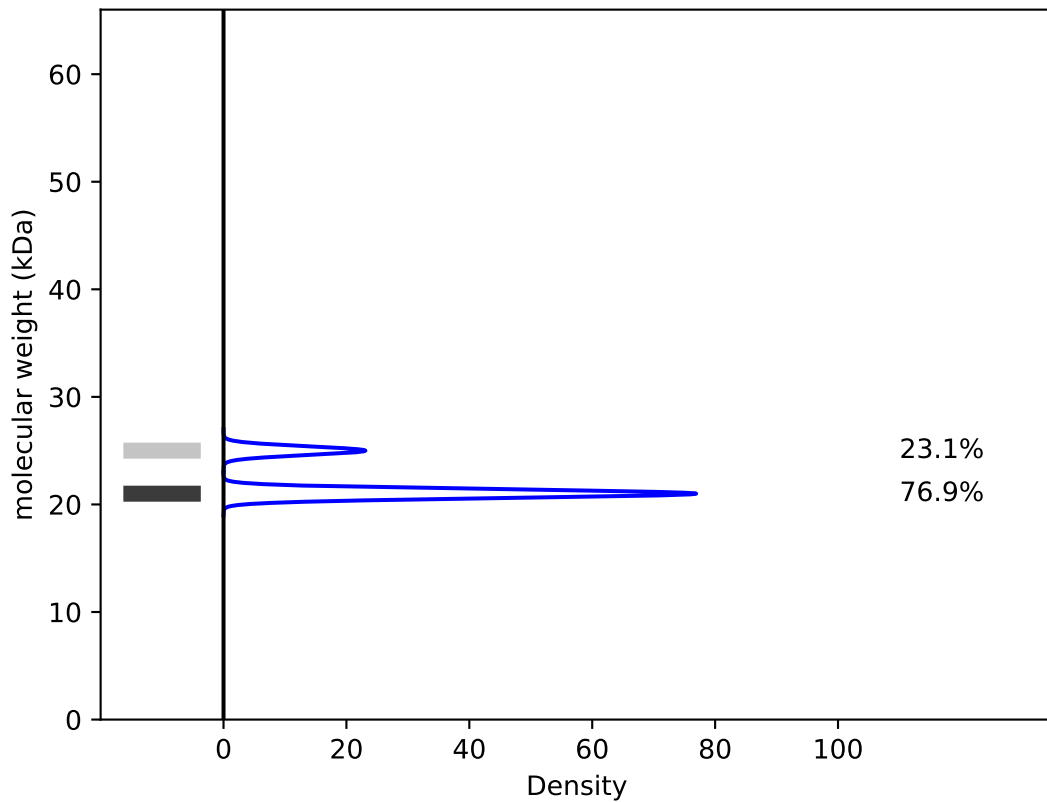

O75414

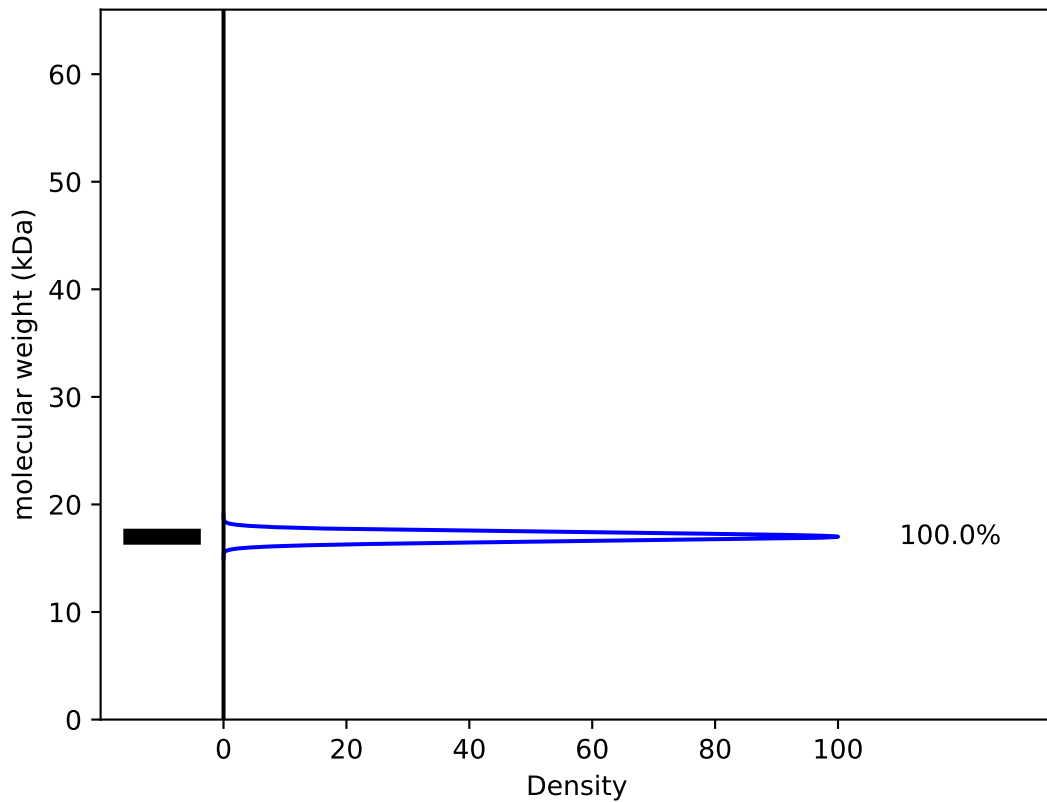

O75436

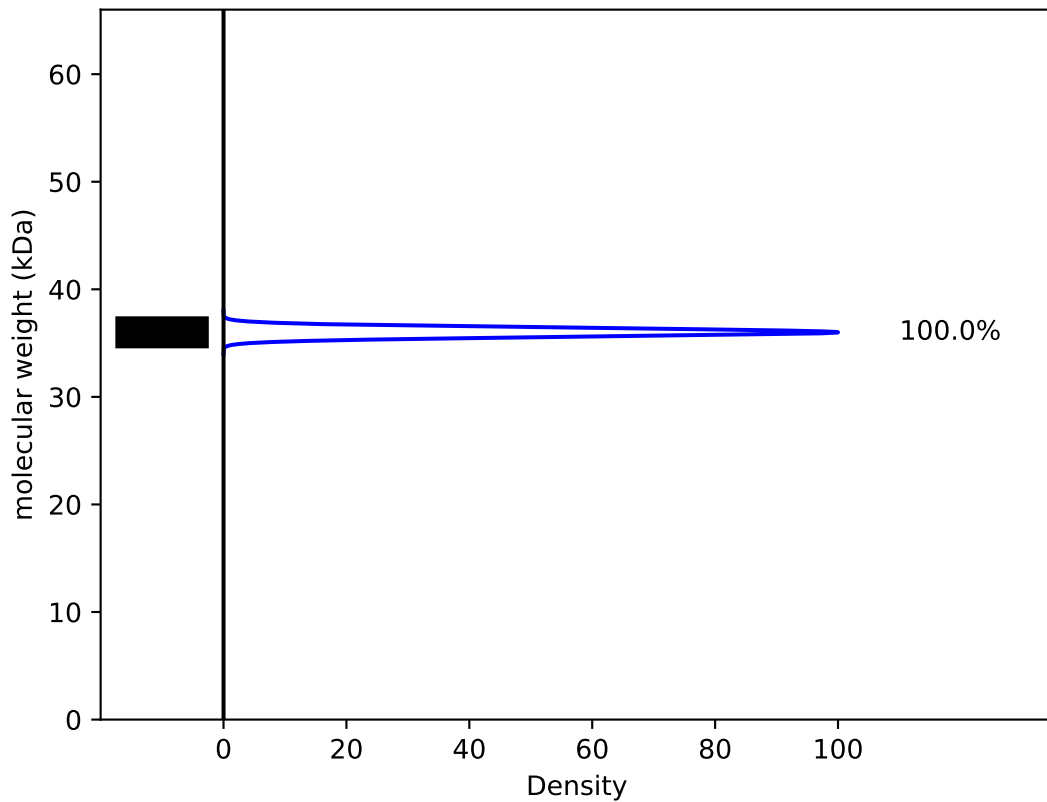

O75489

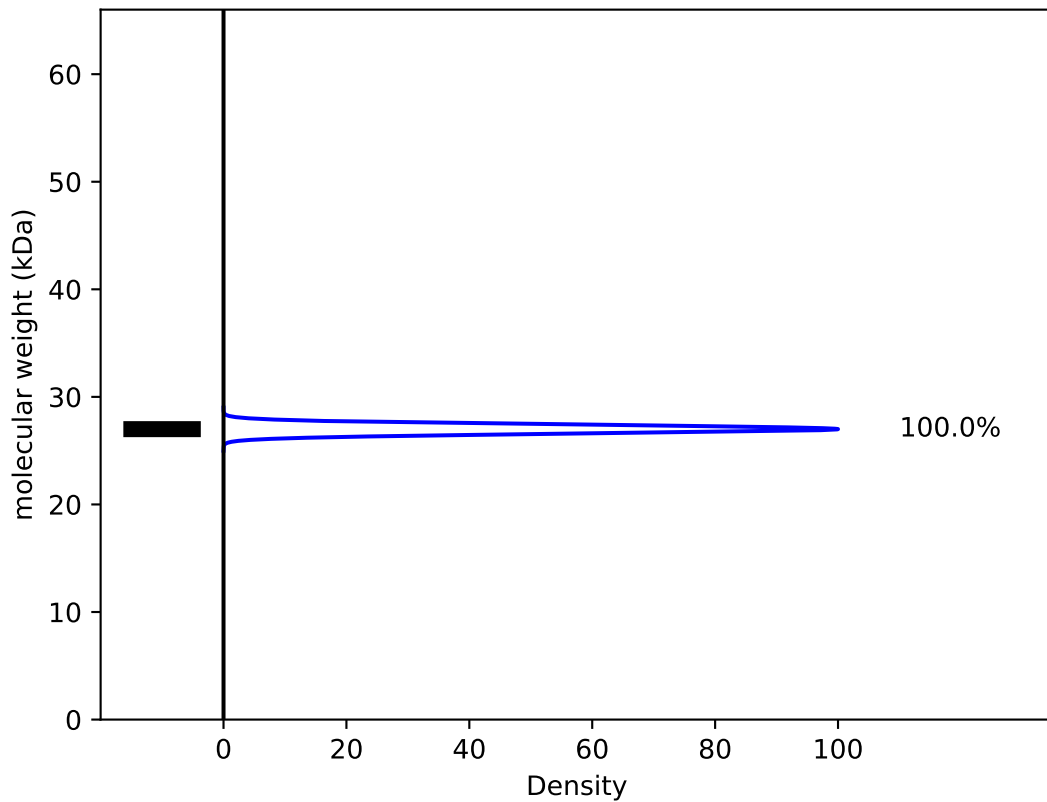

# O75494

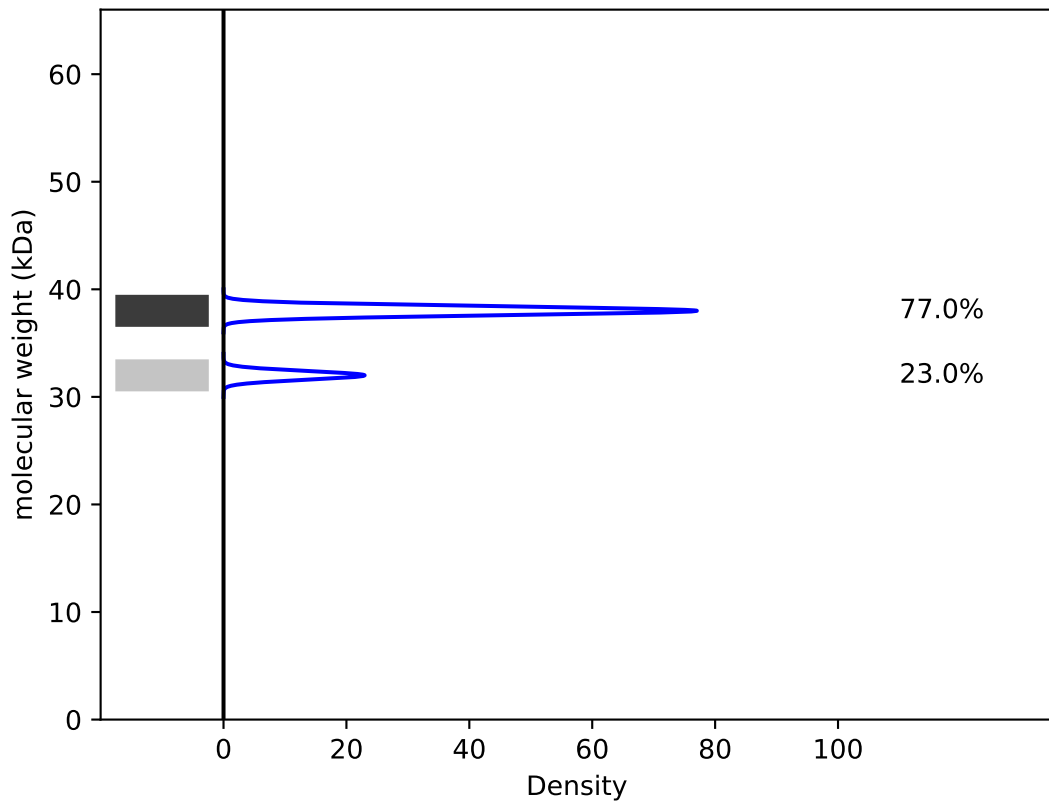

# Q8WXF0

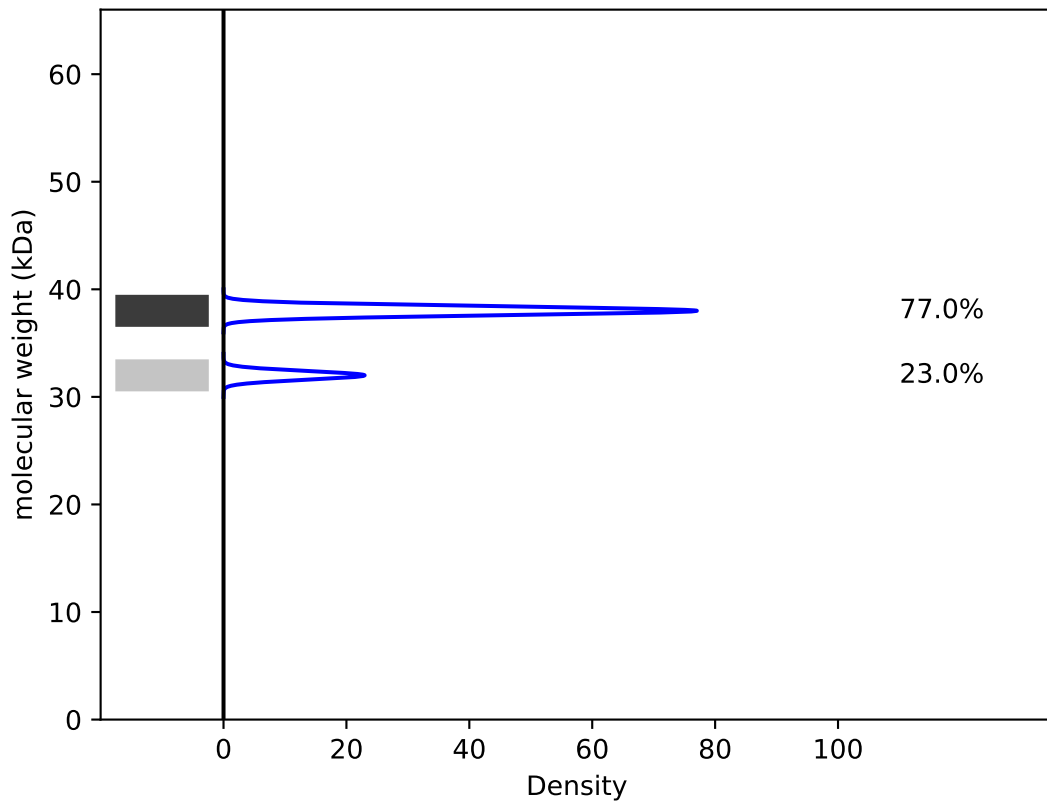

O75521

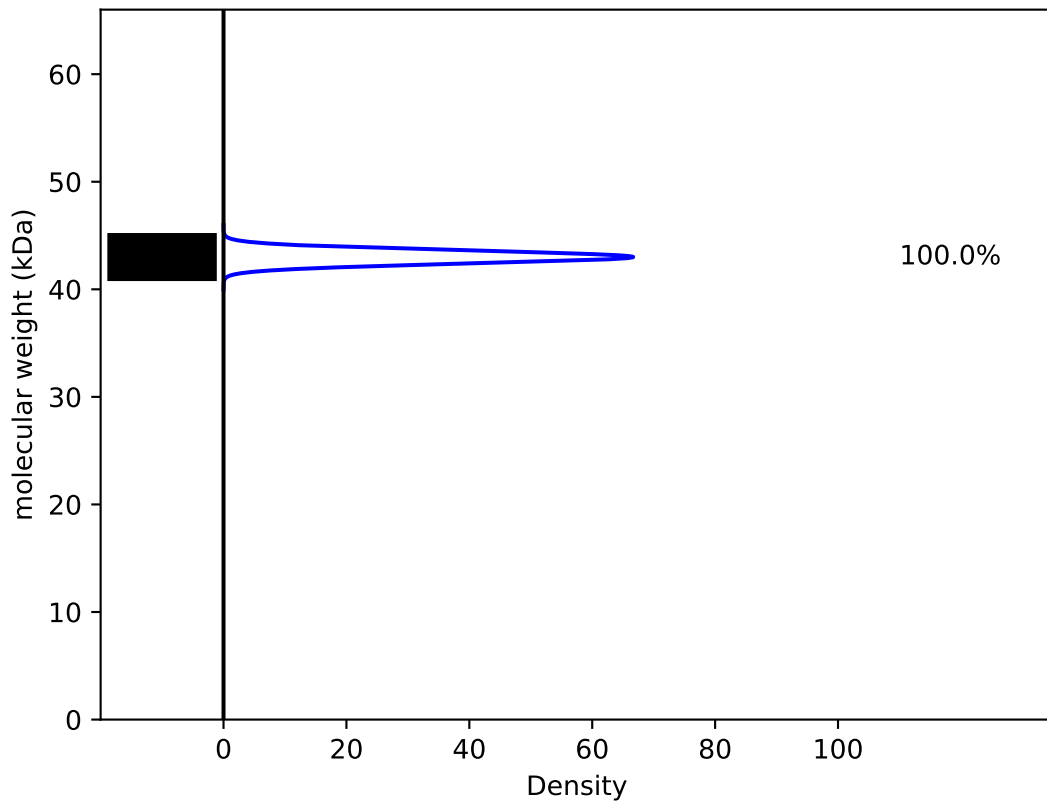

O75607

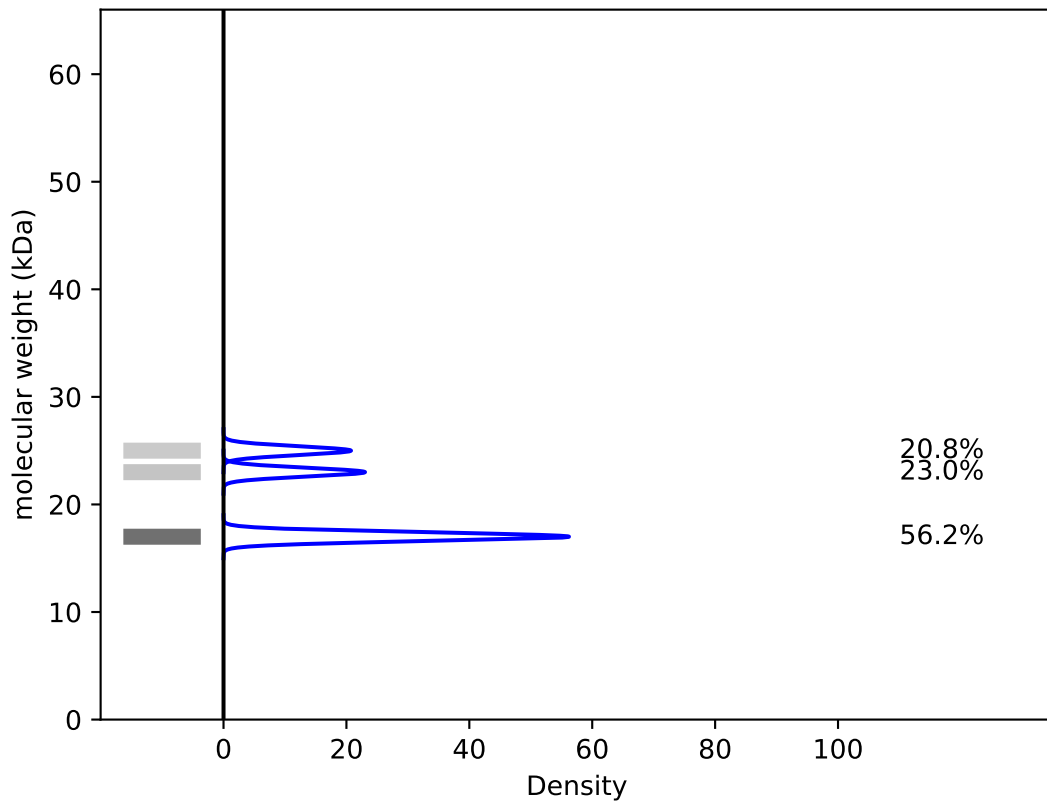



O75616

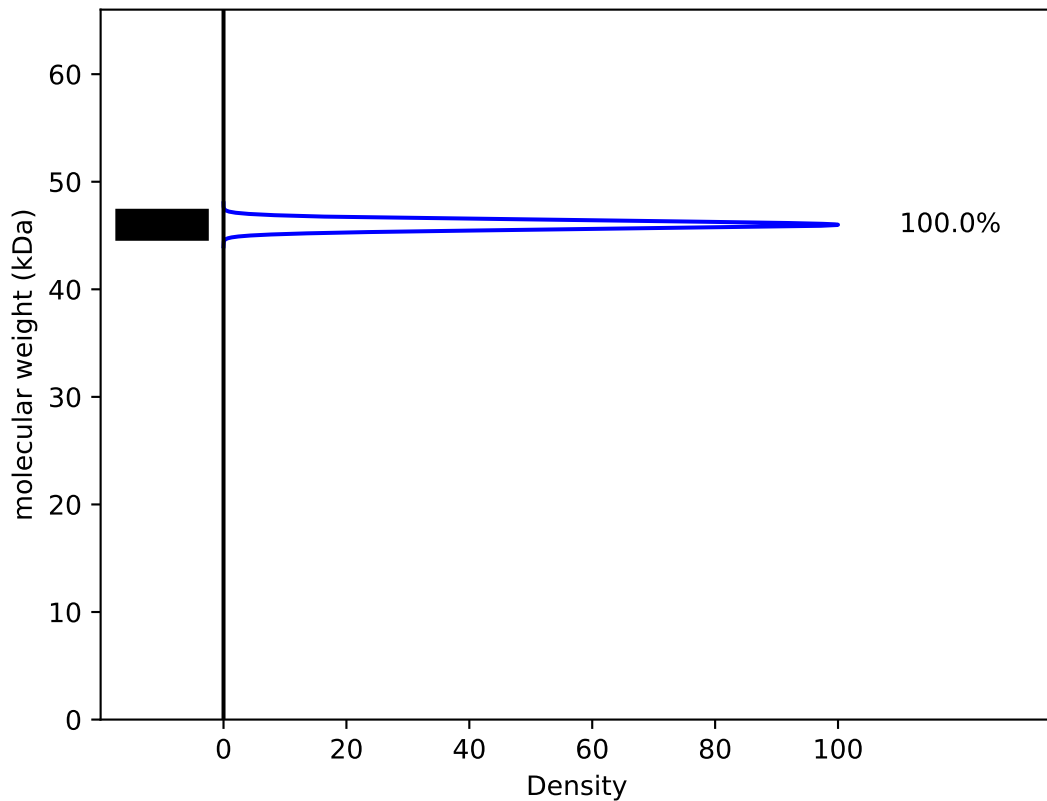

O75718

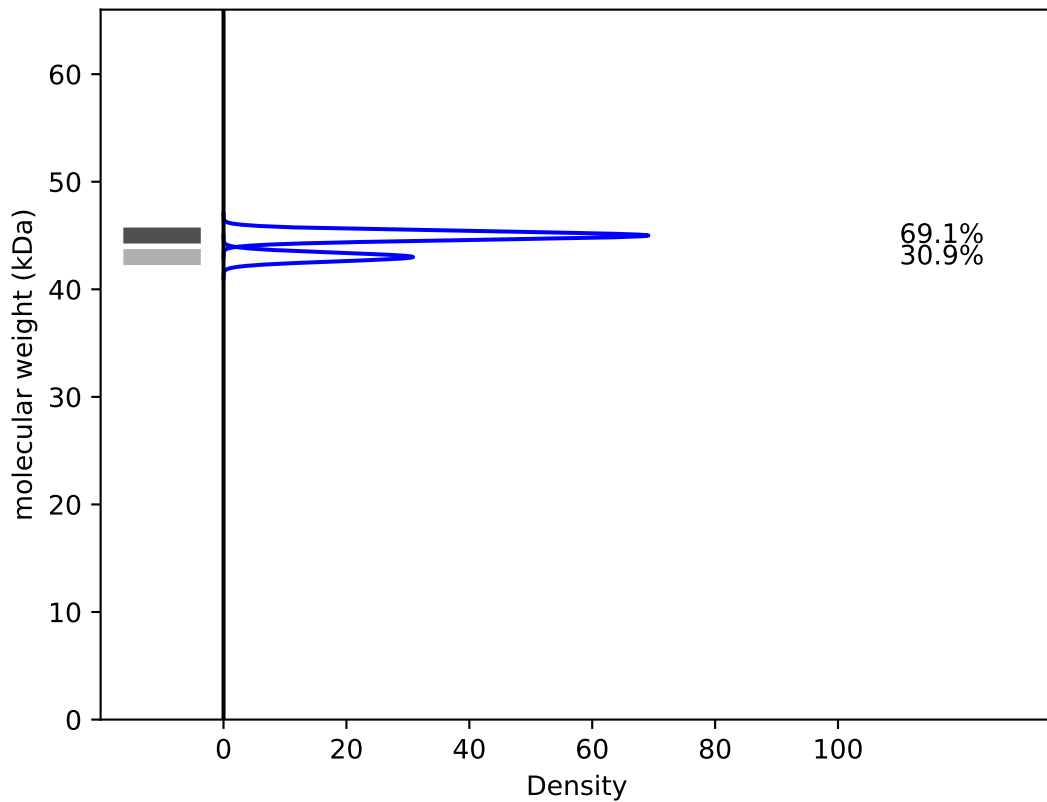

O75792



# O75794

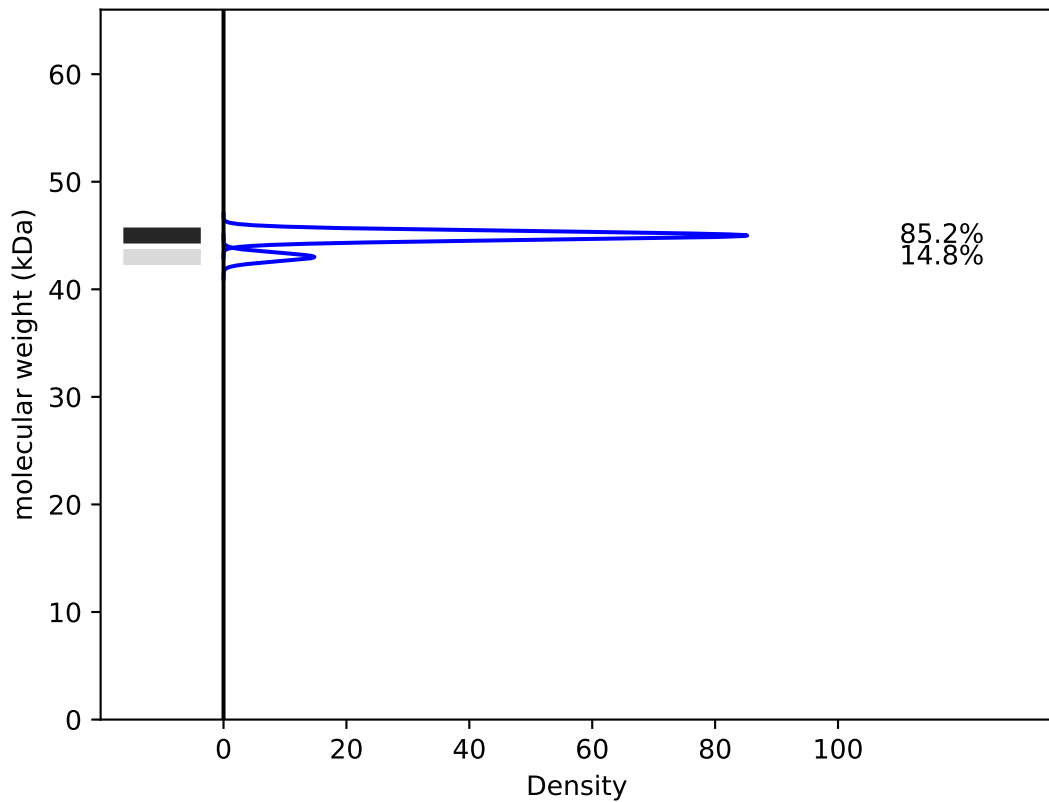

O75822

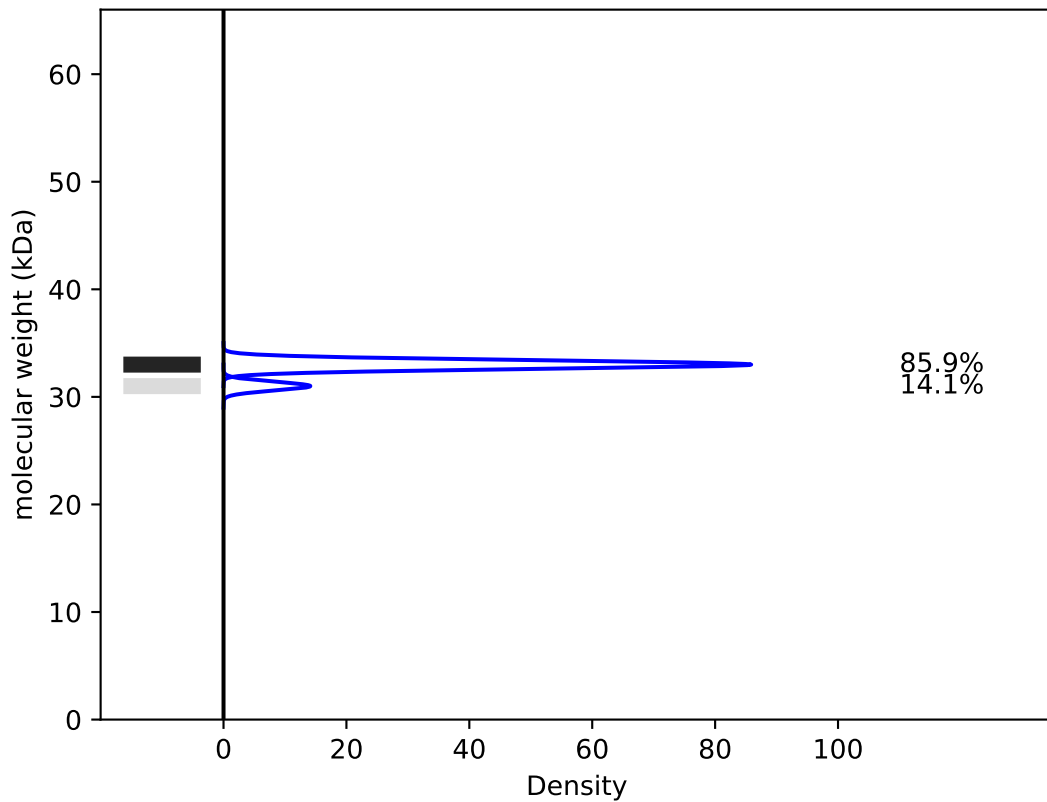

# O75874

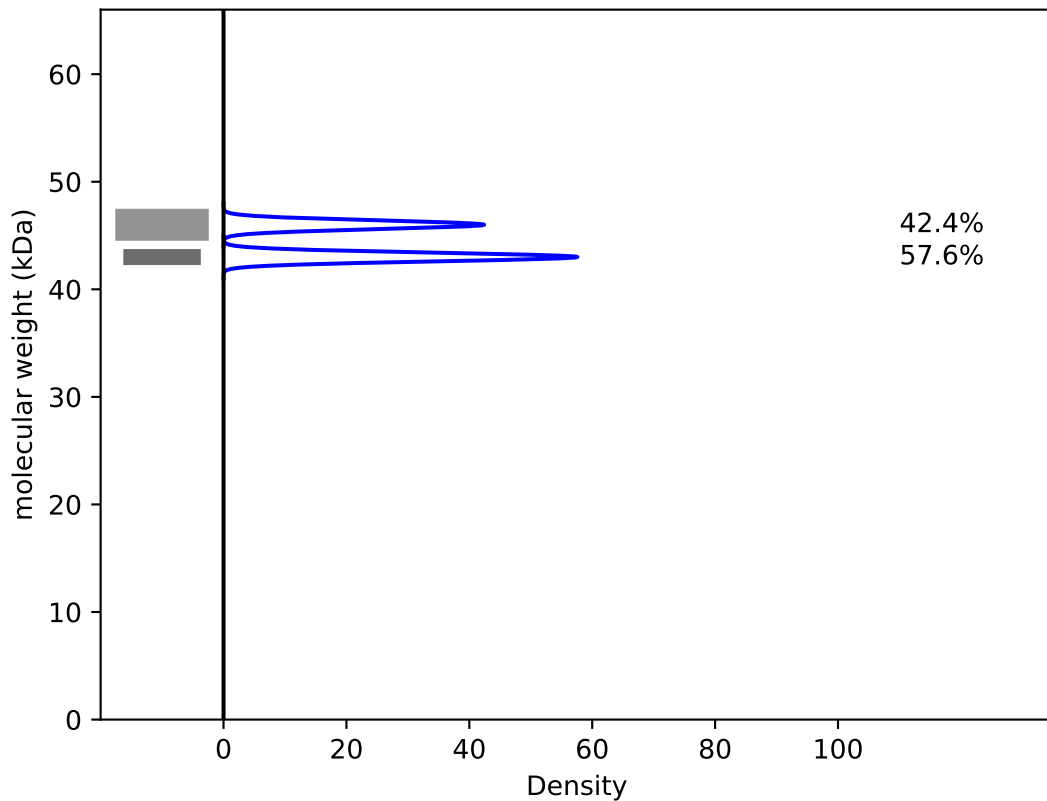

O75937

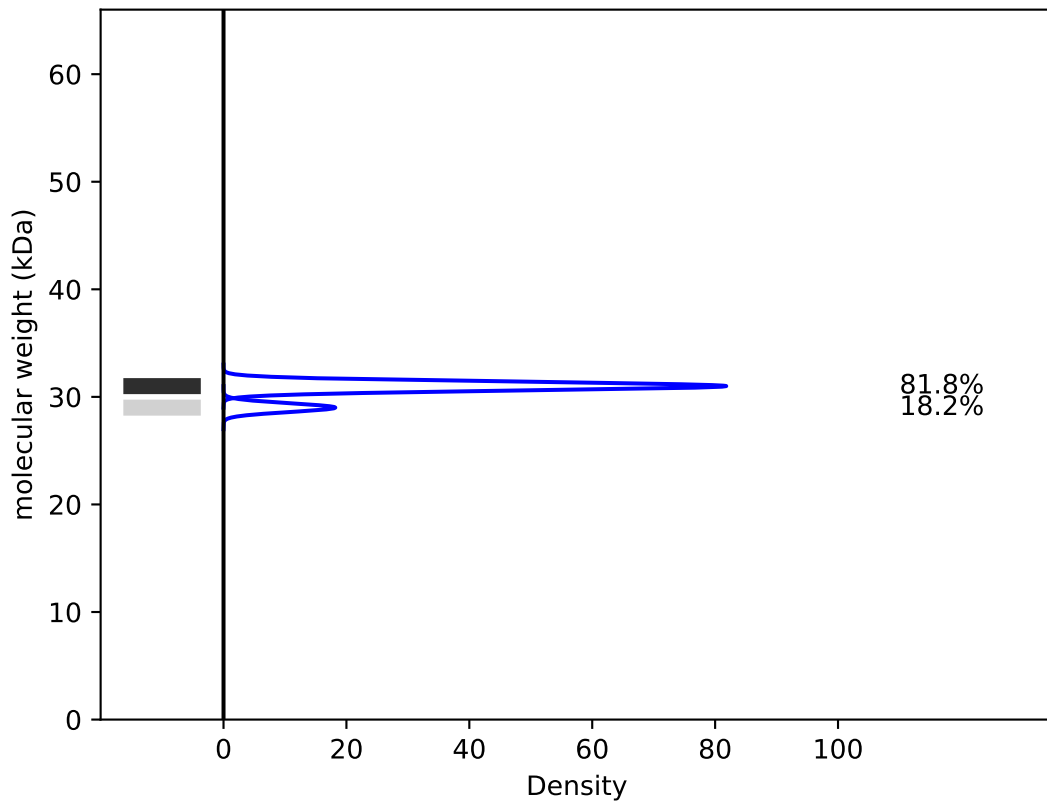

O75947

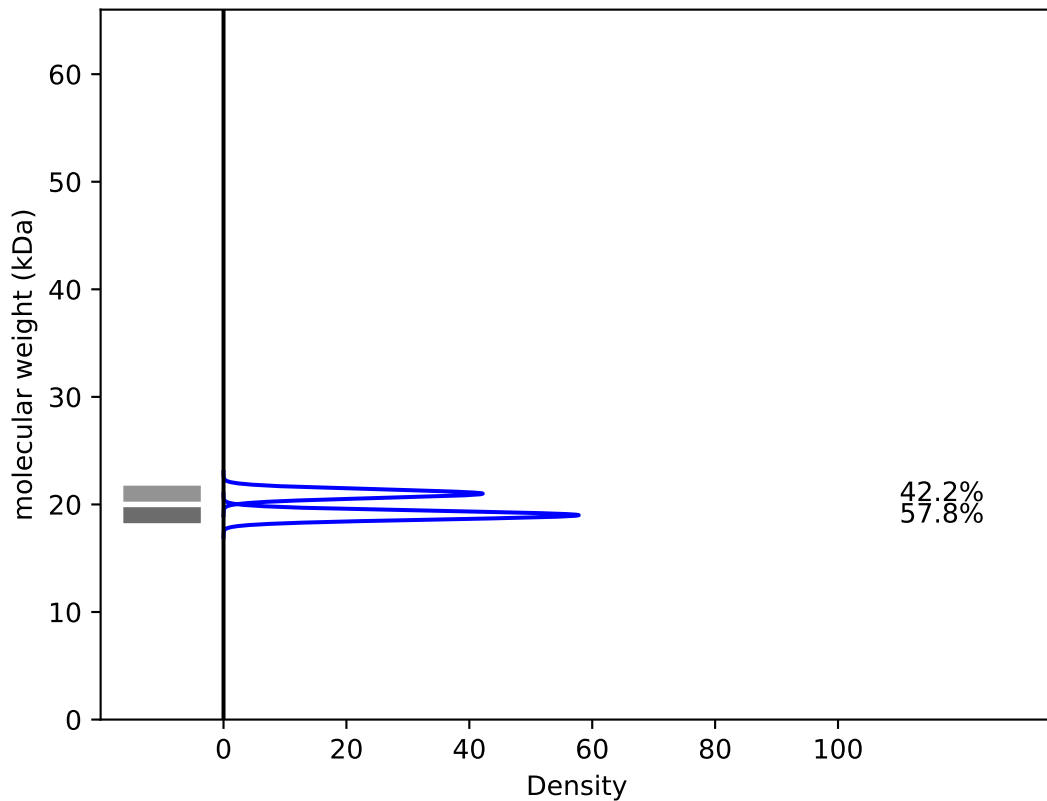



O75955

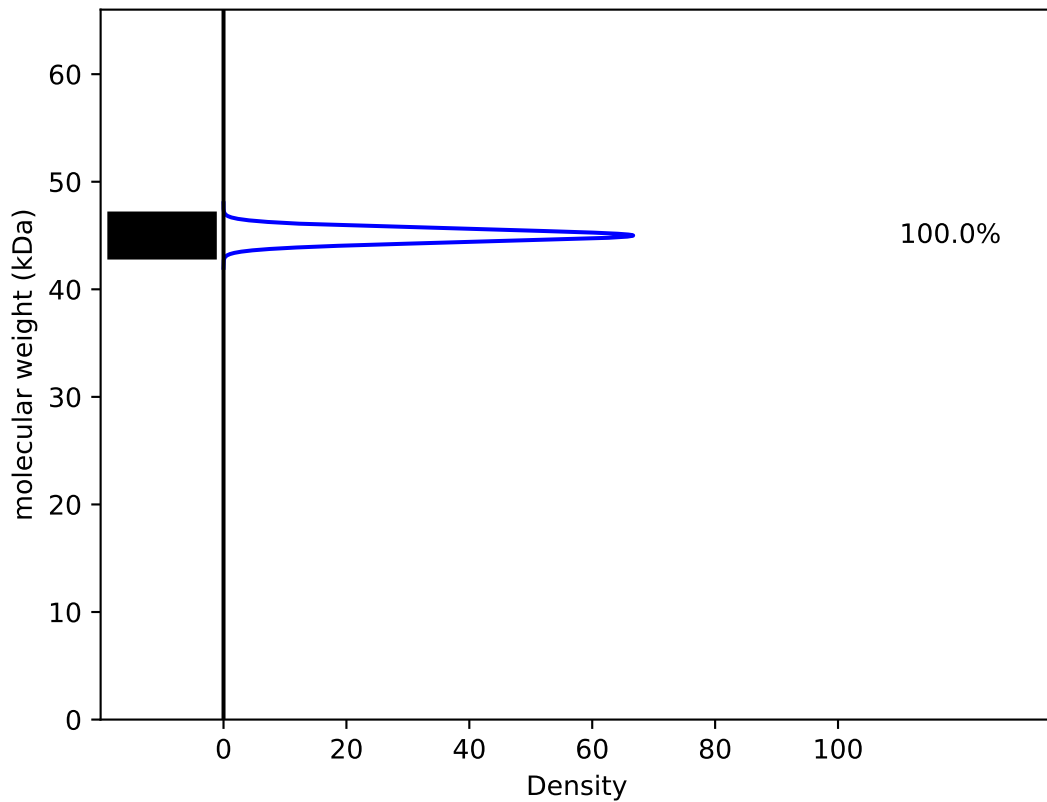

O76003

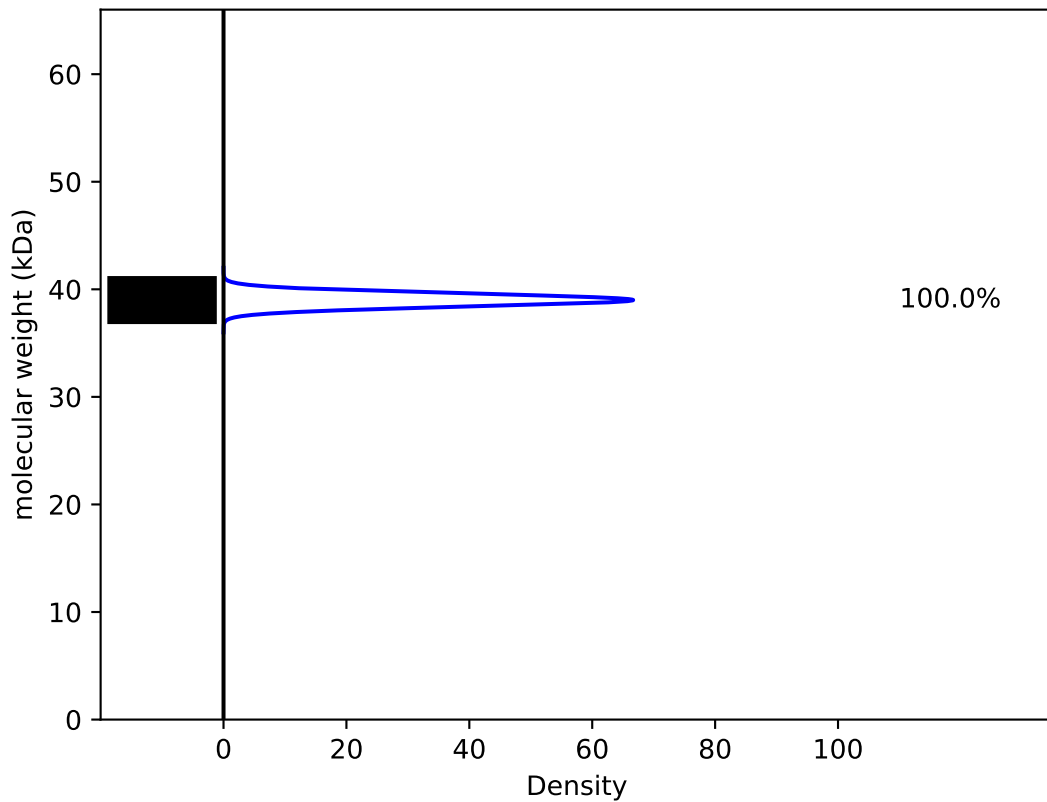

O76021

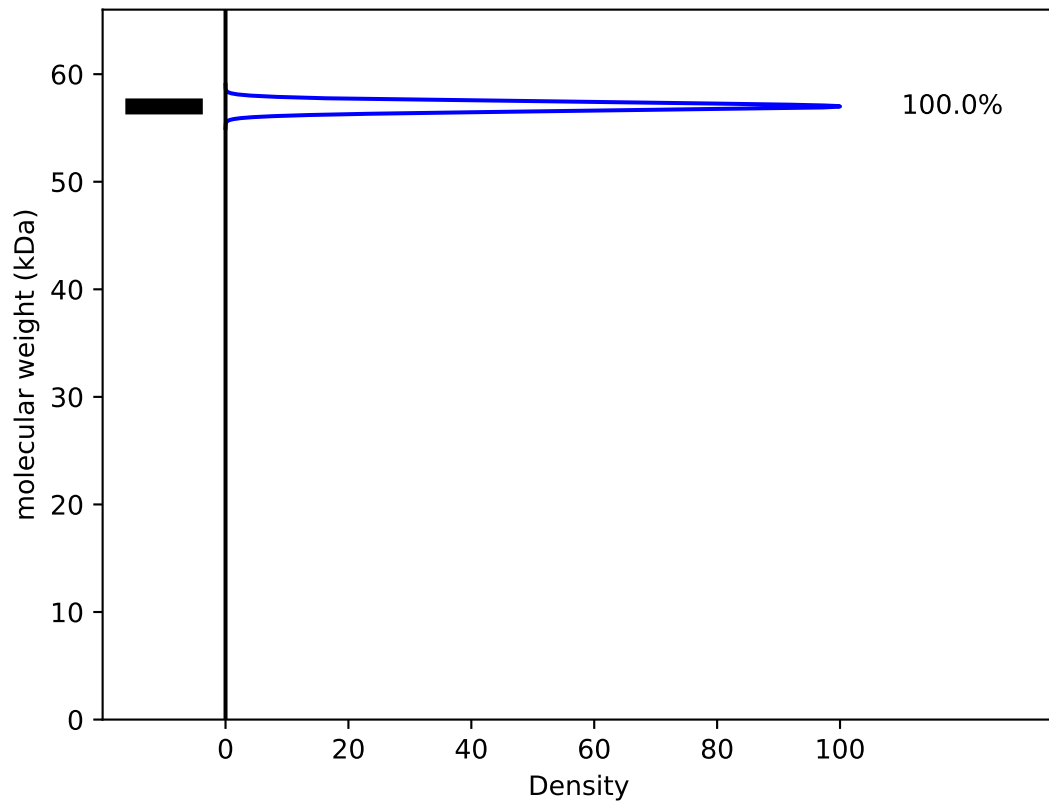

O76071

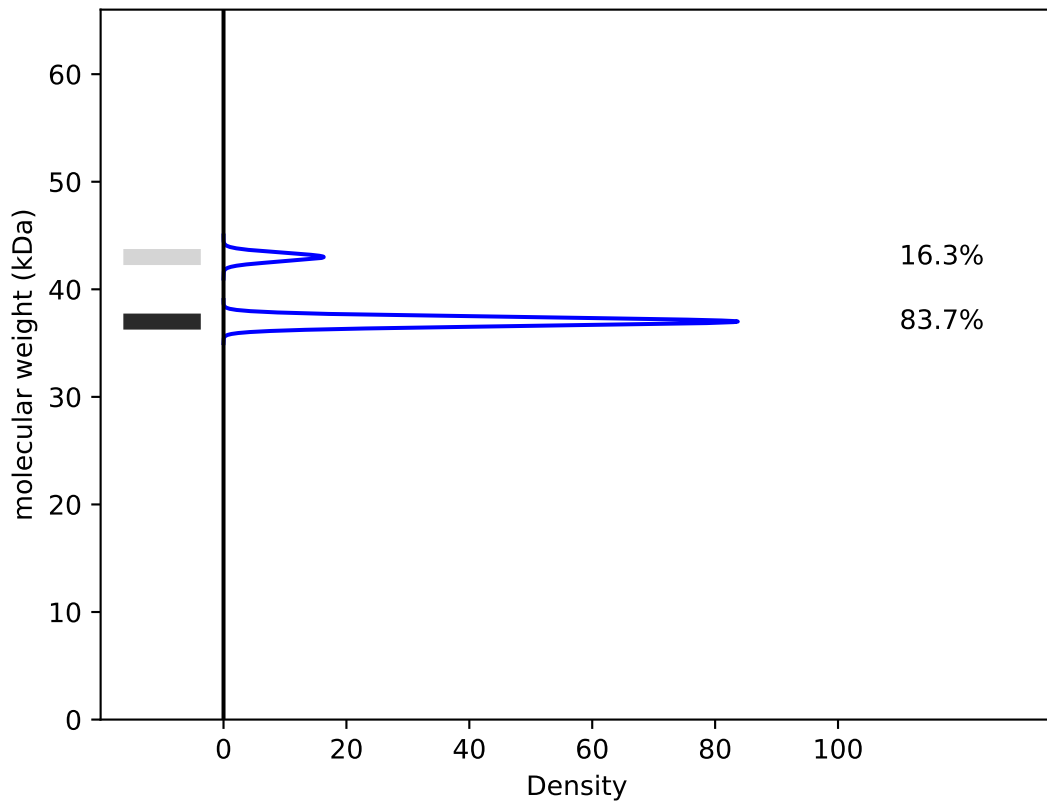

O94905

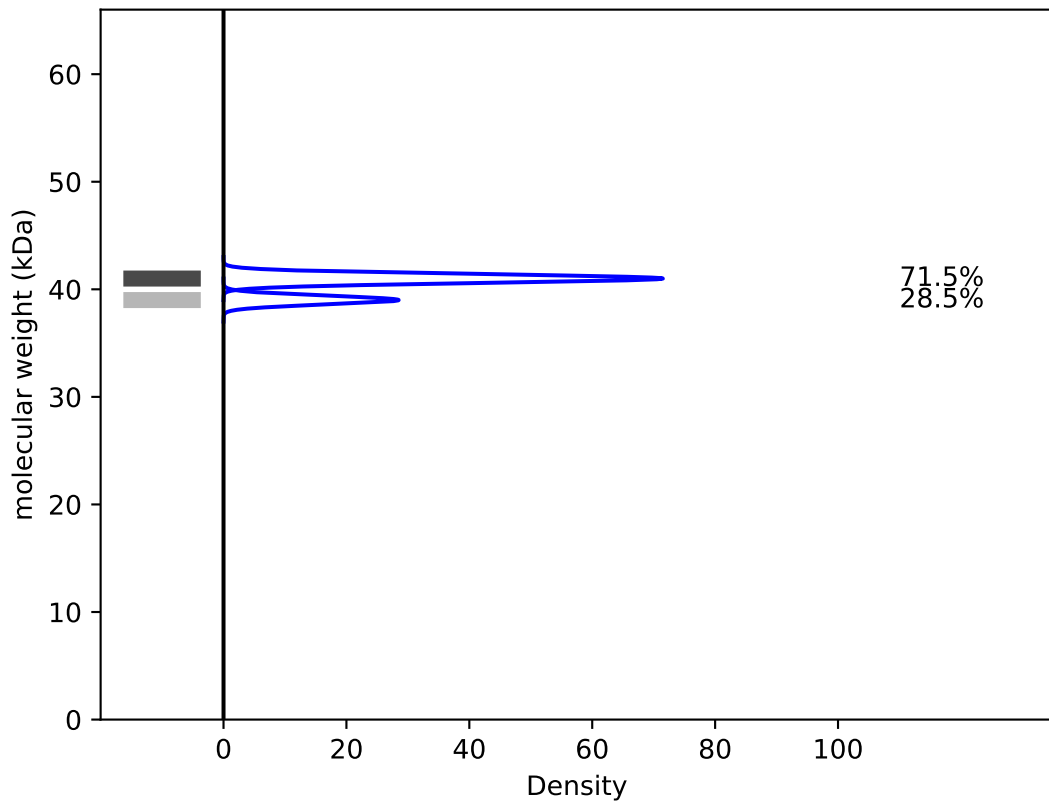

O95070

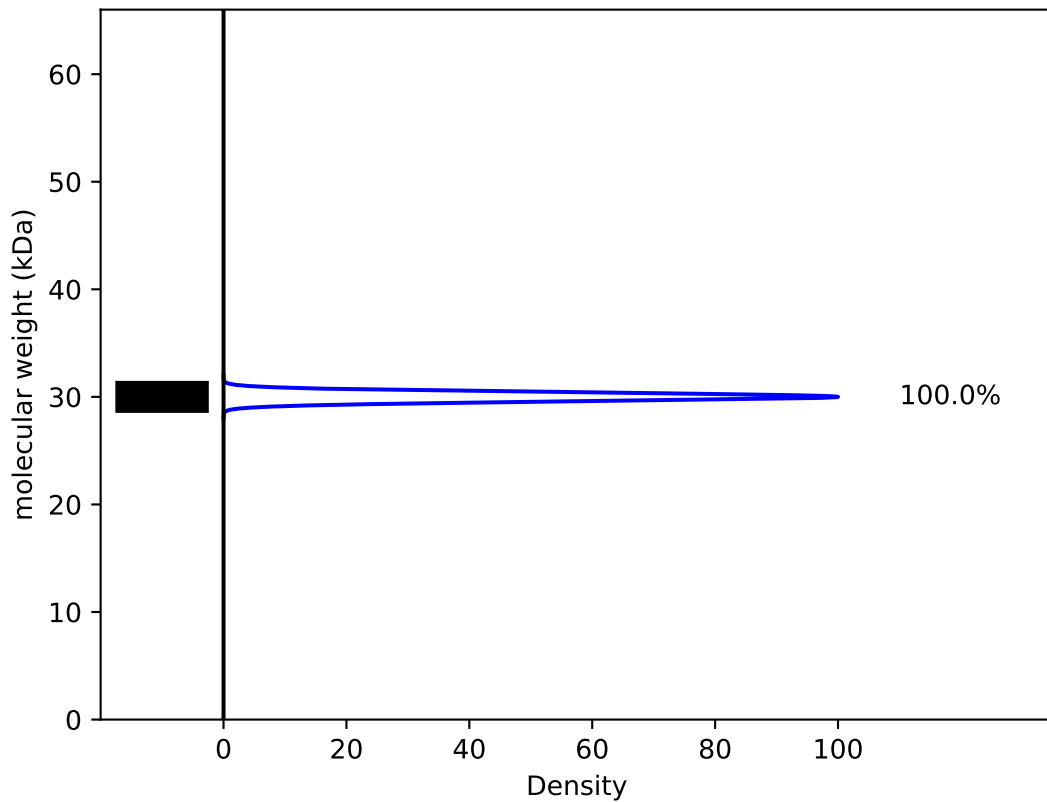

O95232



O95292





# O95299

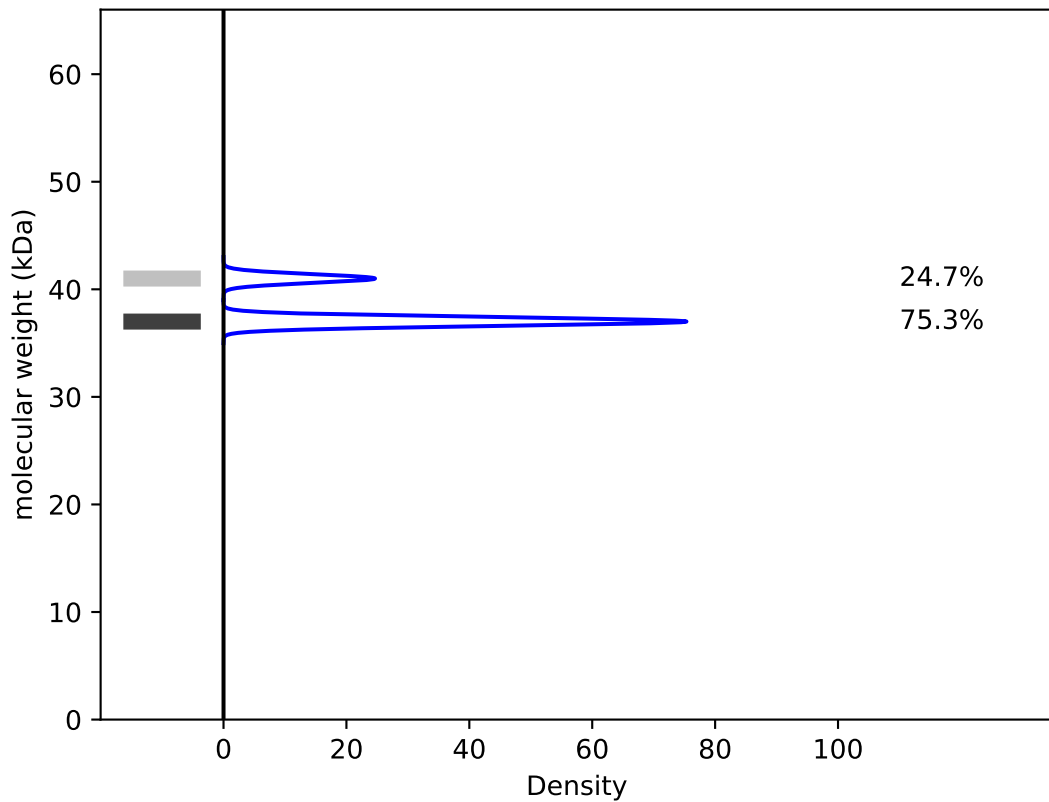

O95336



O95433

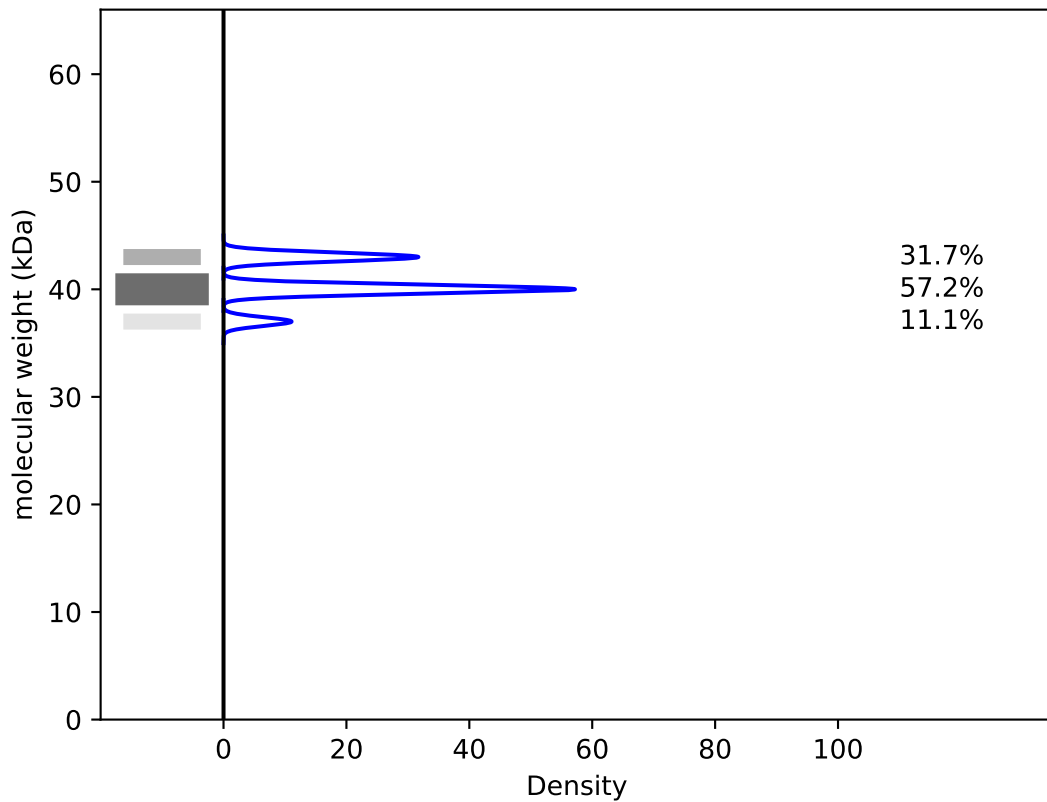

O95456



O95478



O95551



O95571

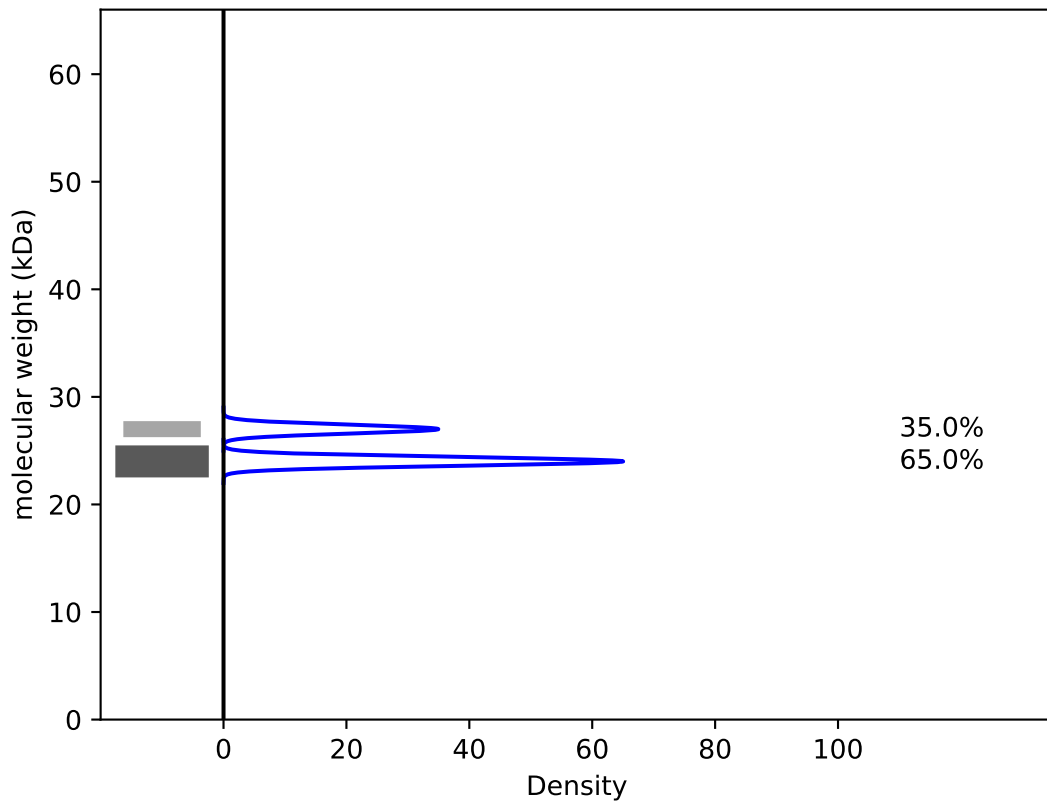

O95707

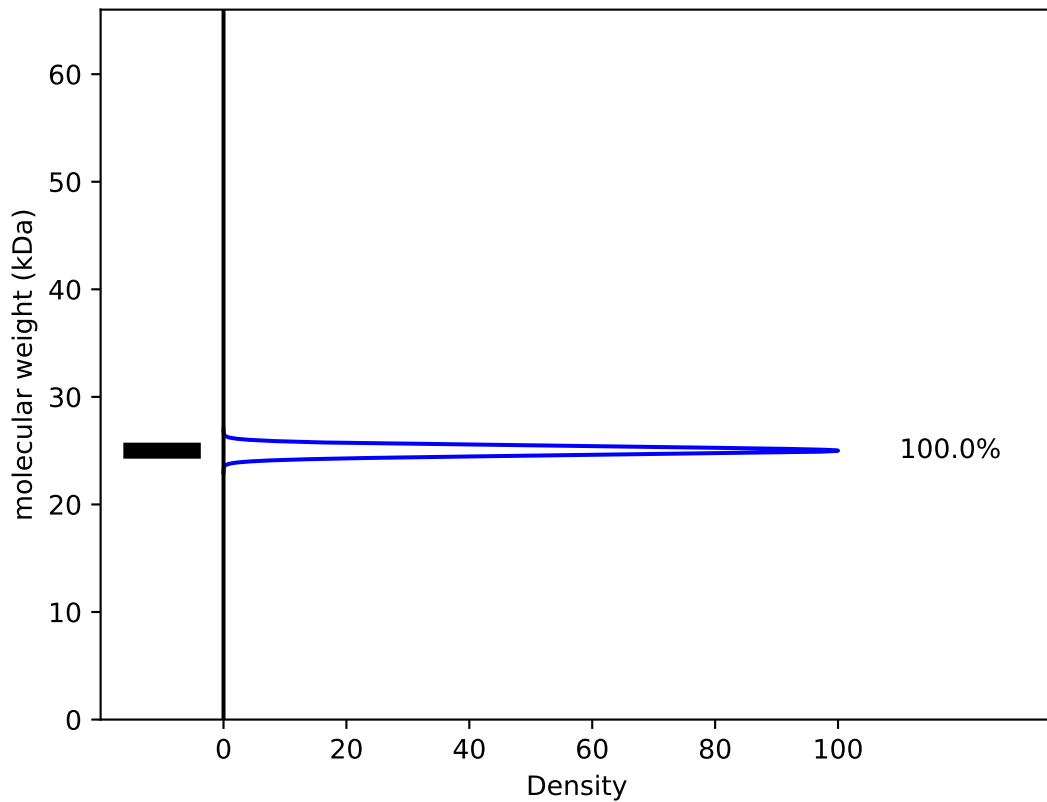



O95716

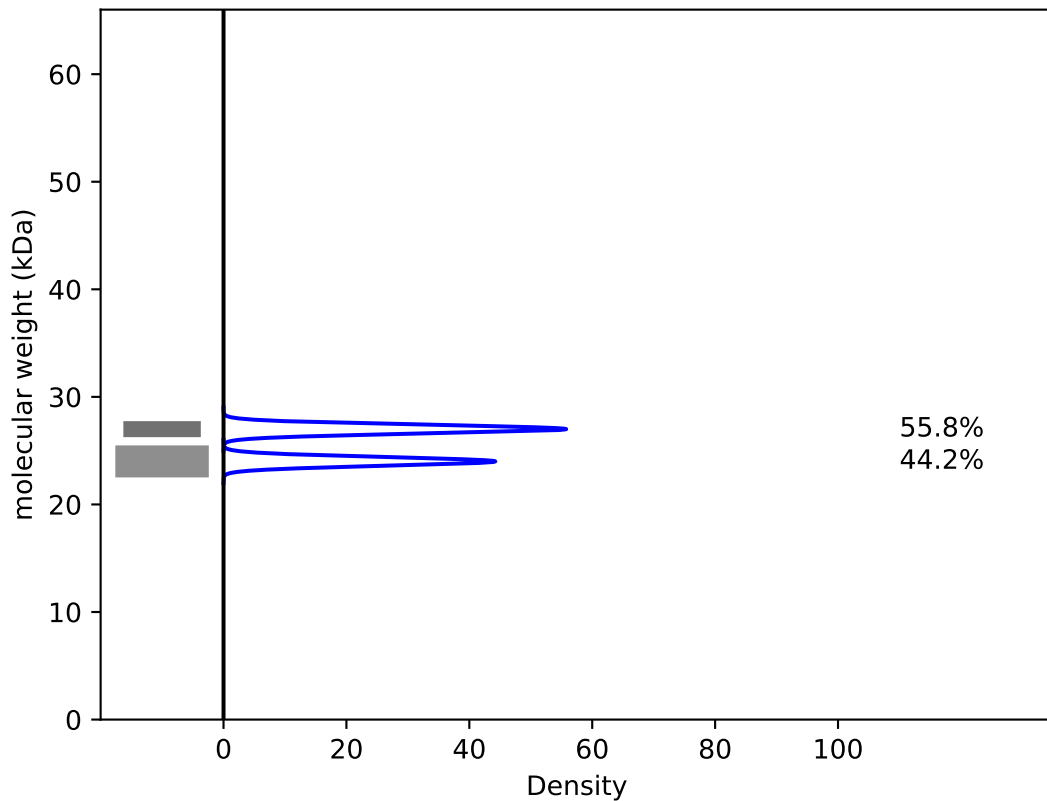

# P20337

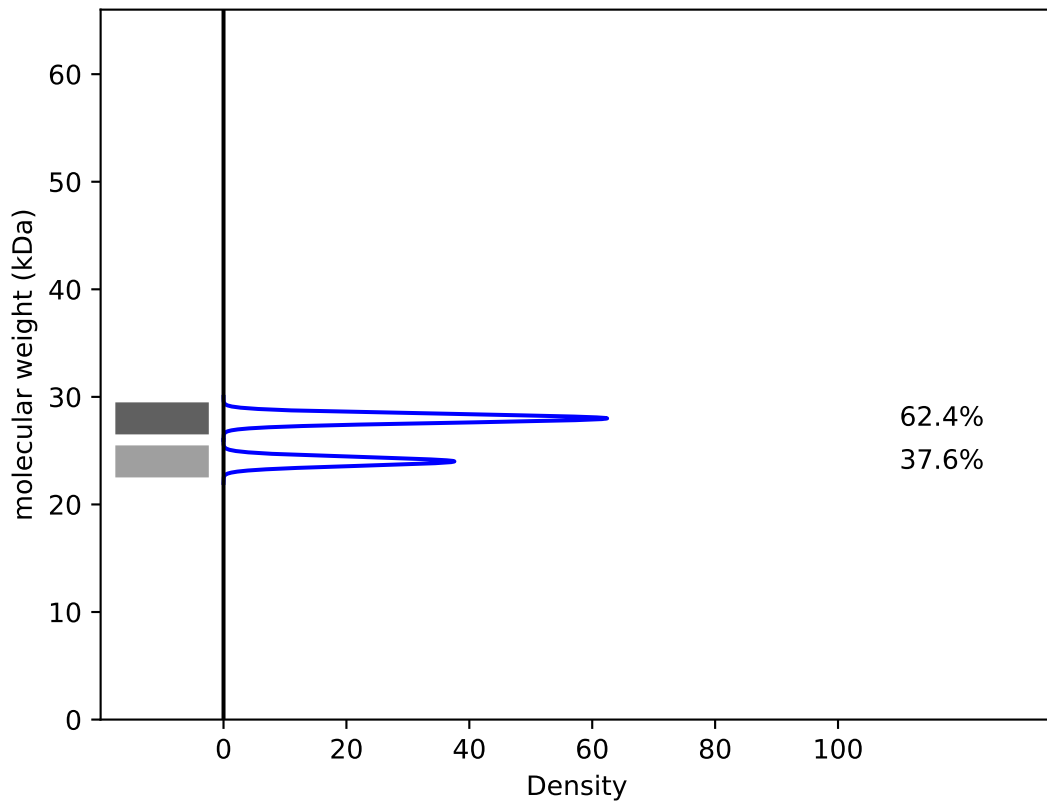

# P20336

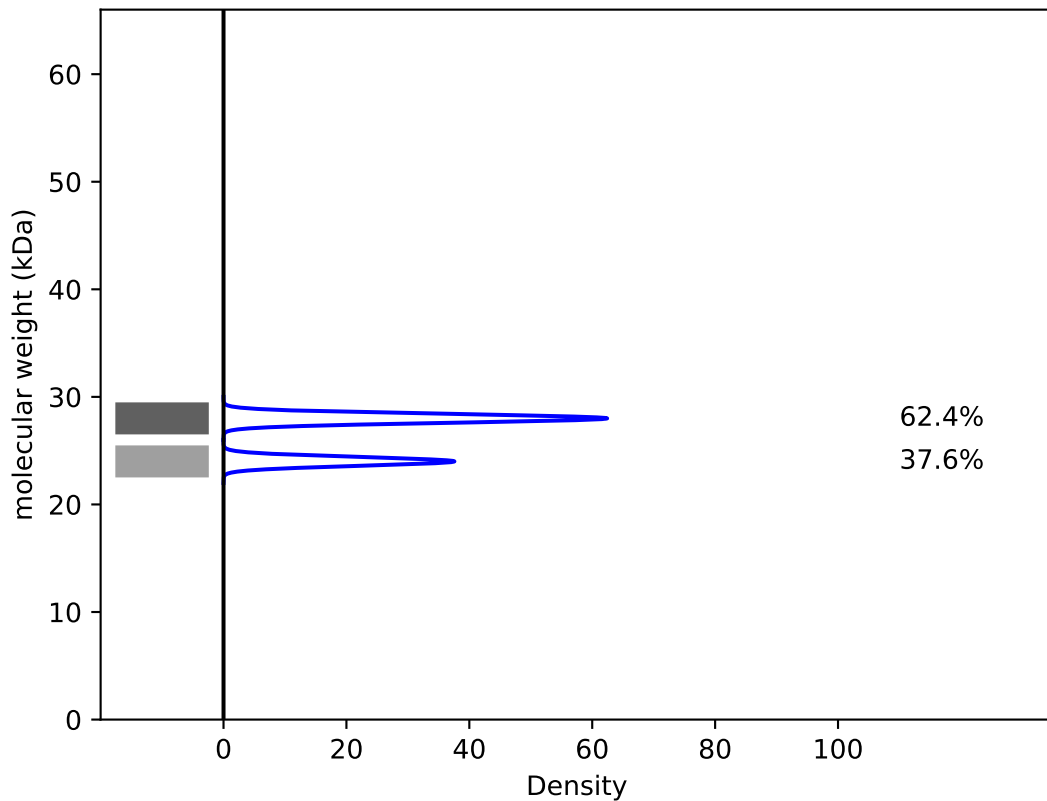

# Q96E17

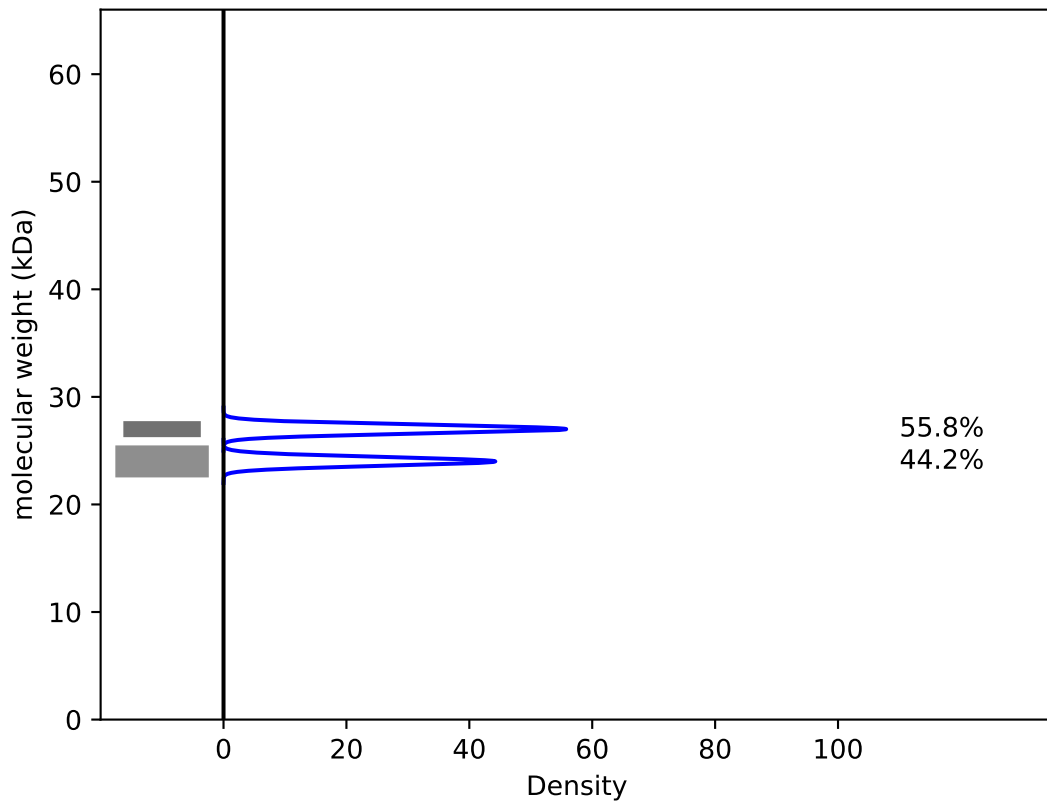

O95747

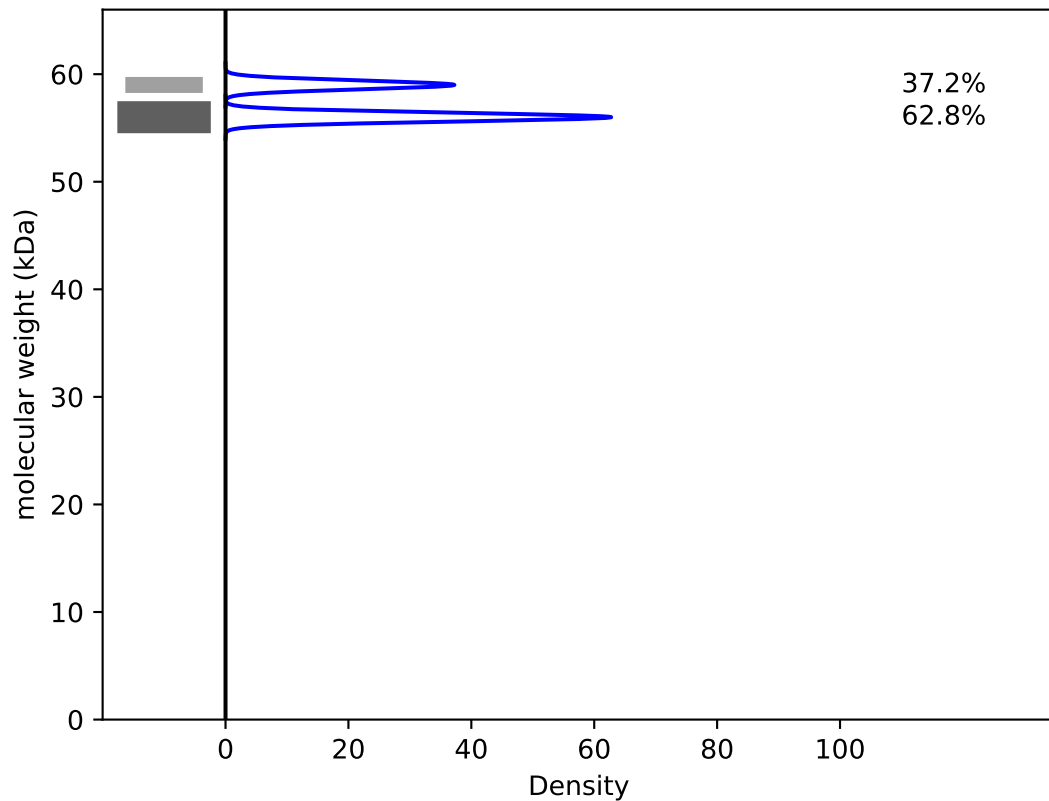

O95816



O95861

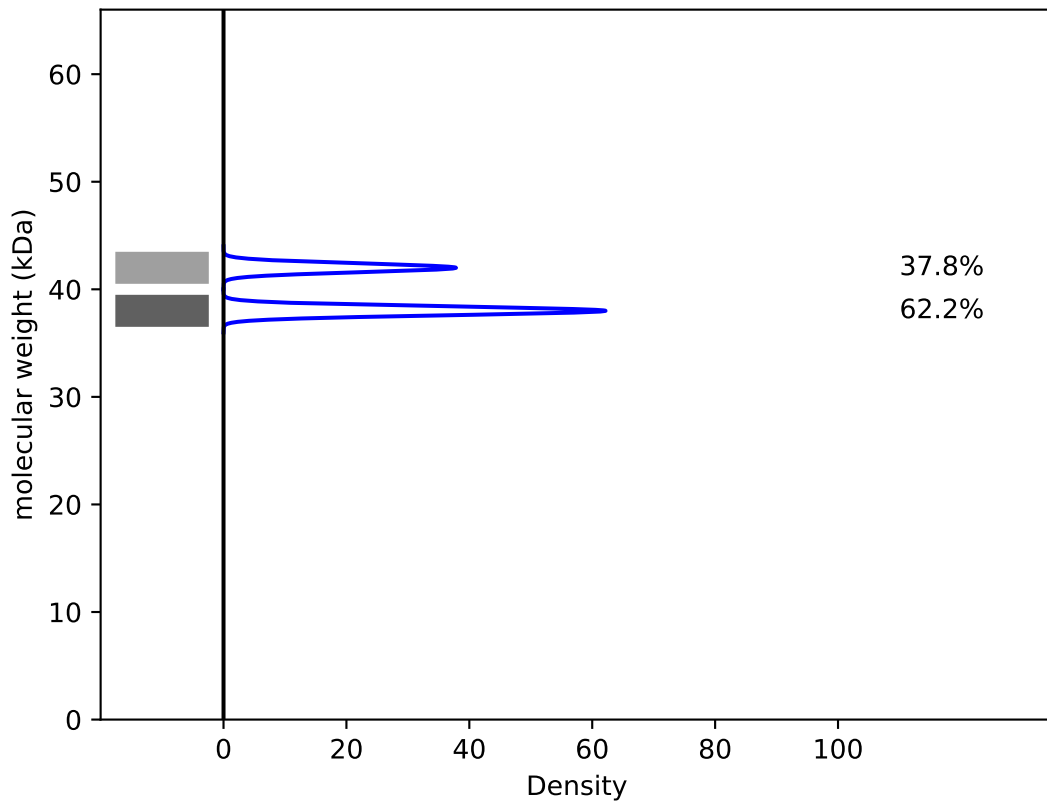

O95900

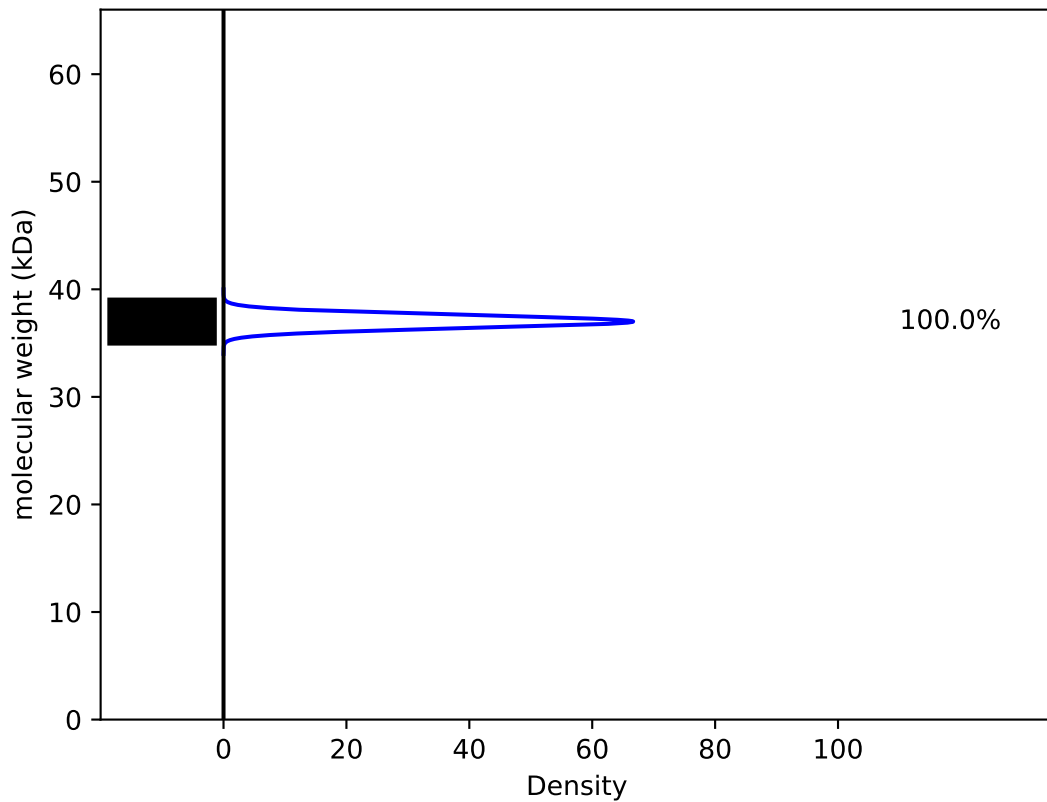



O95989

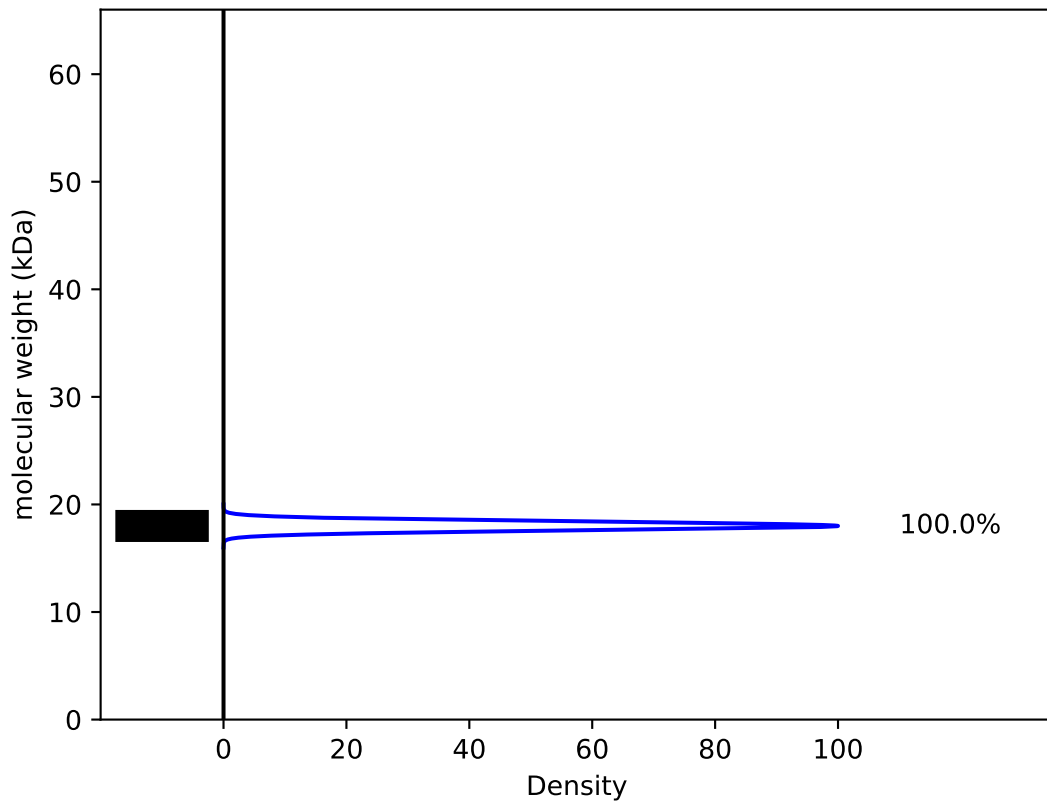

# O96000

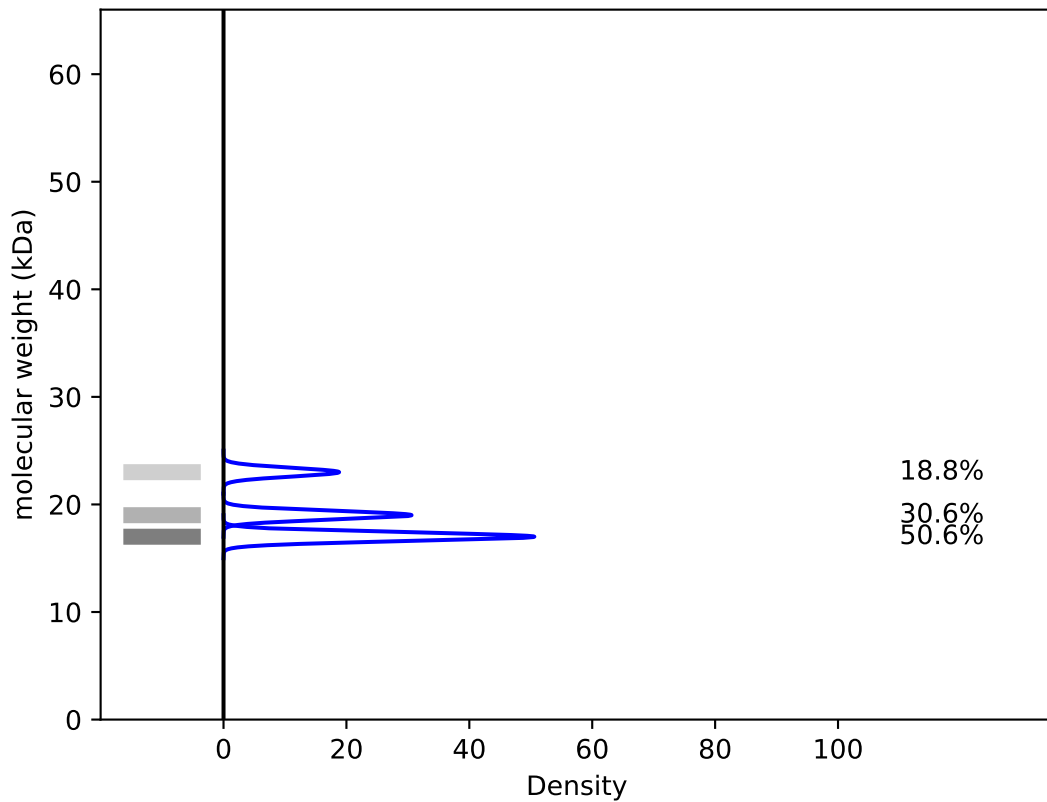

O96008

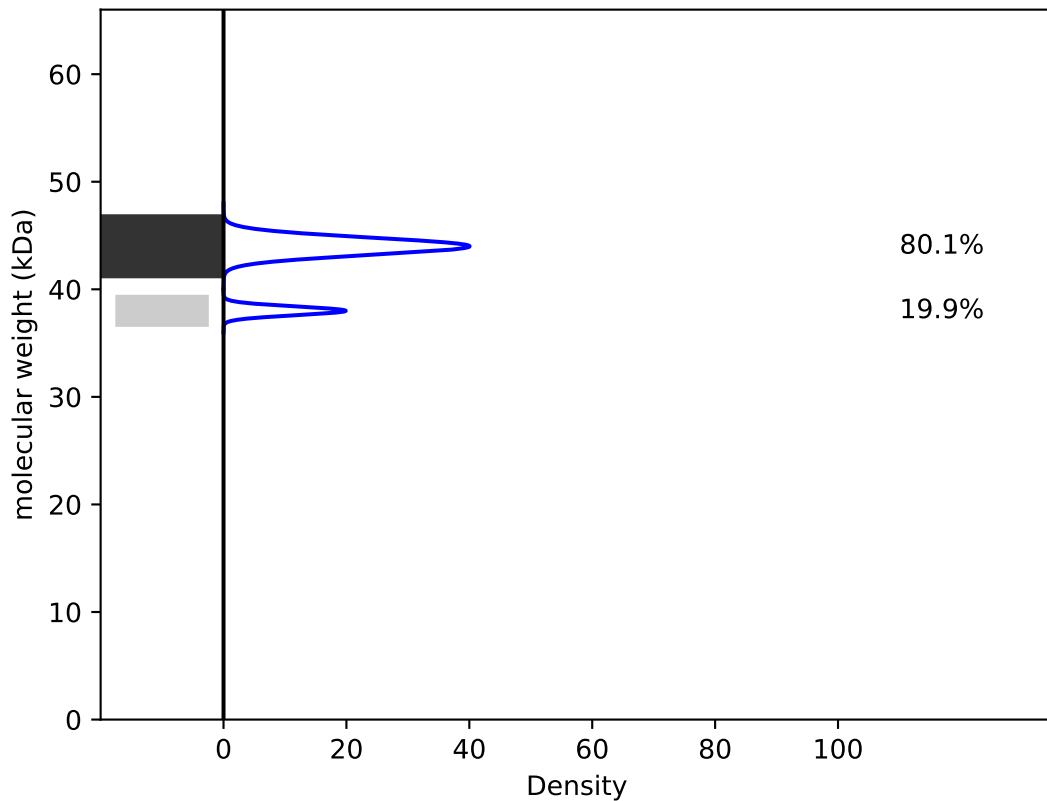

O96019



O94805



P00338

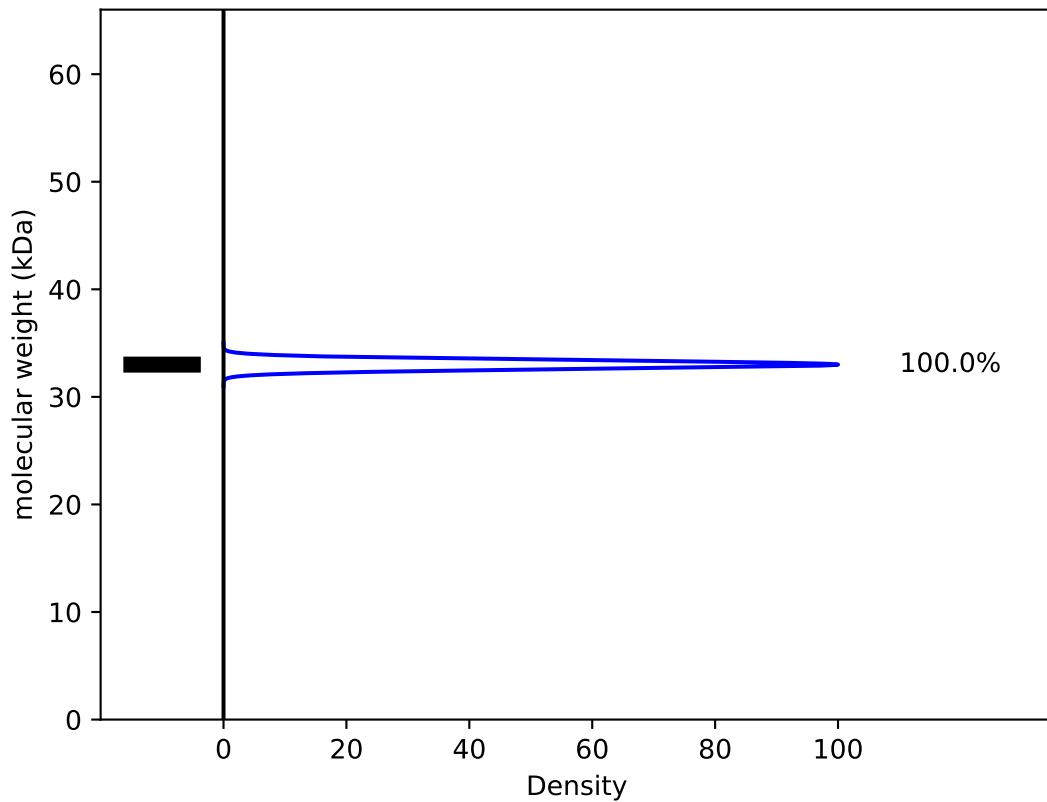

# Q6ZMR3

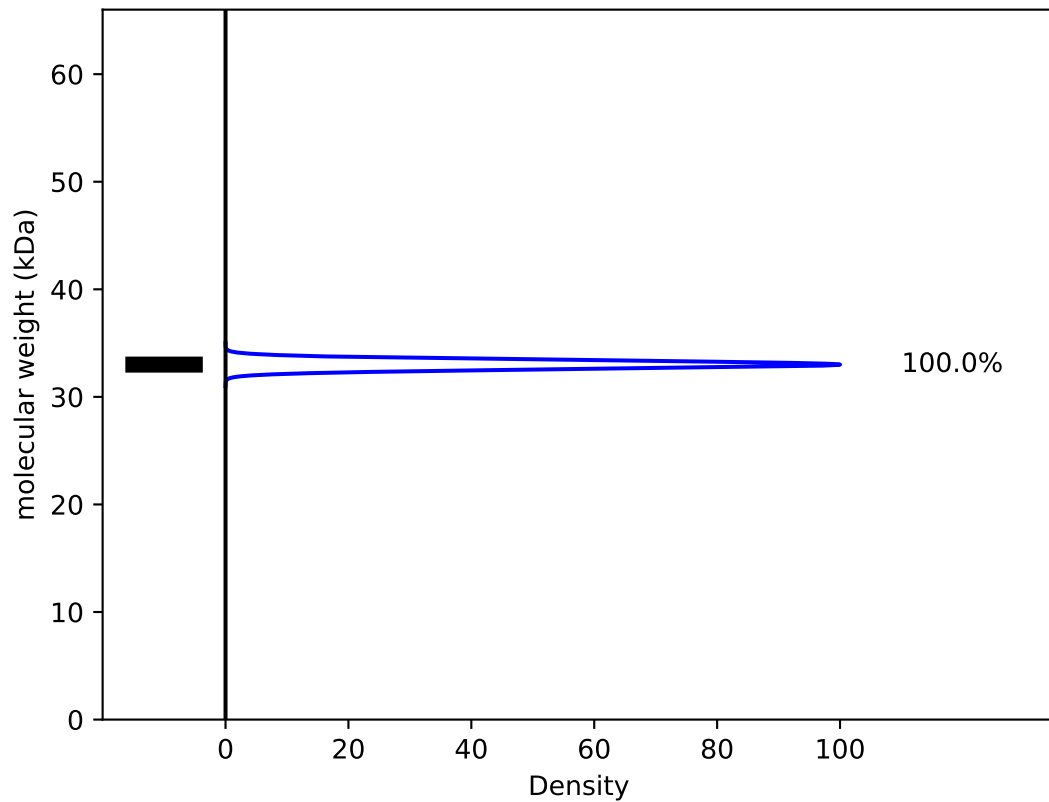

P07864





P00387

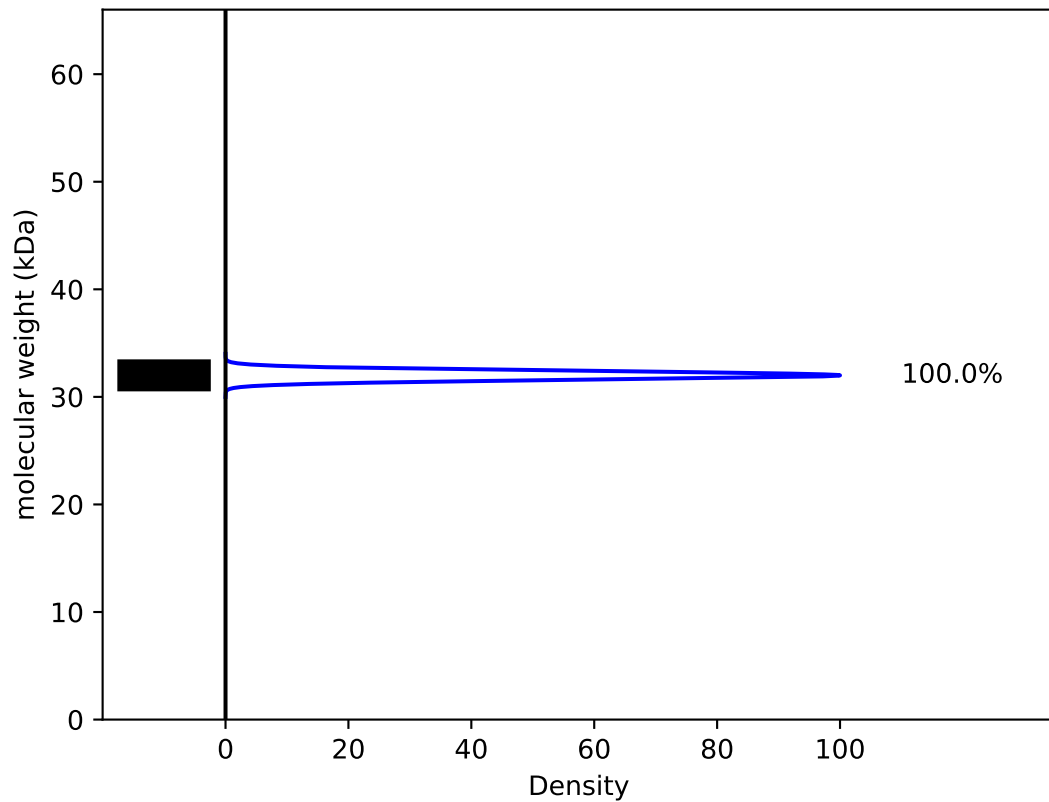

P00390

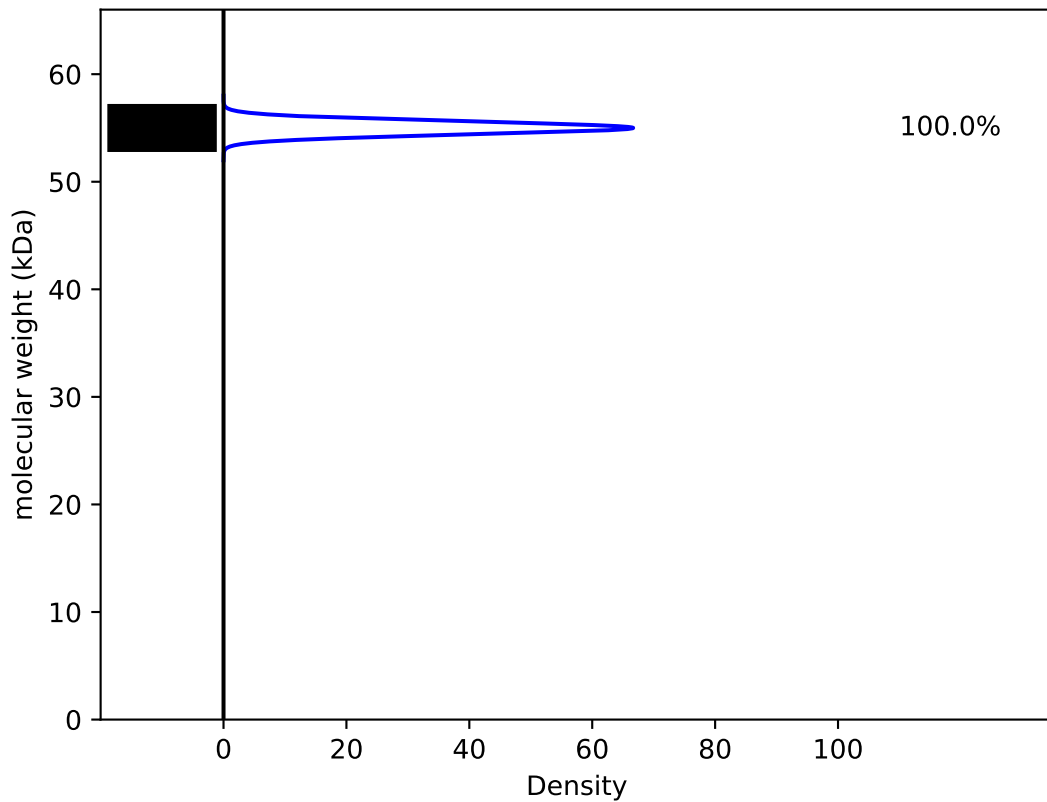

P00403



P00492

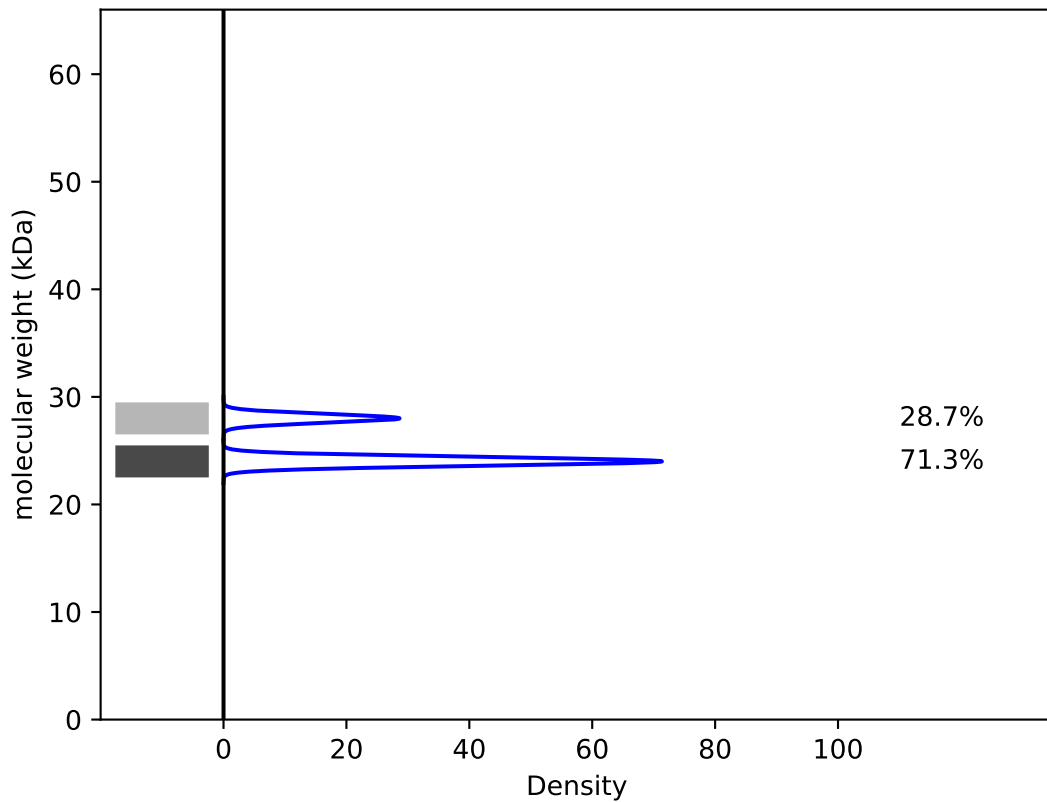

P00558



P00568

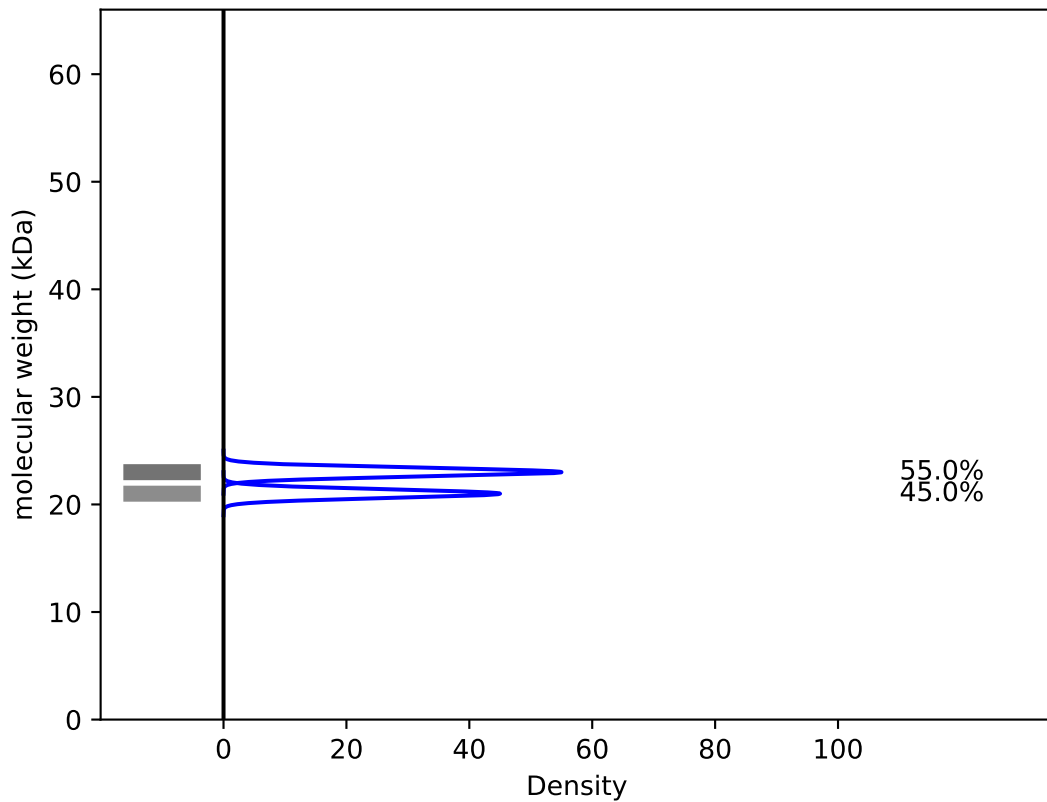

P00966



# P01111

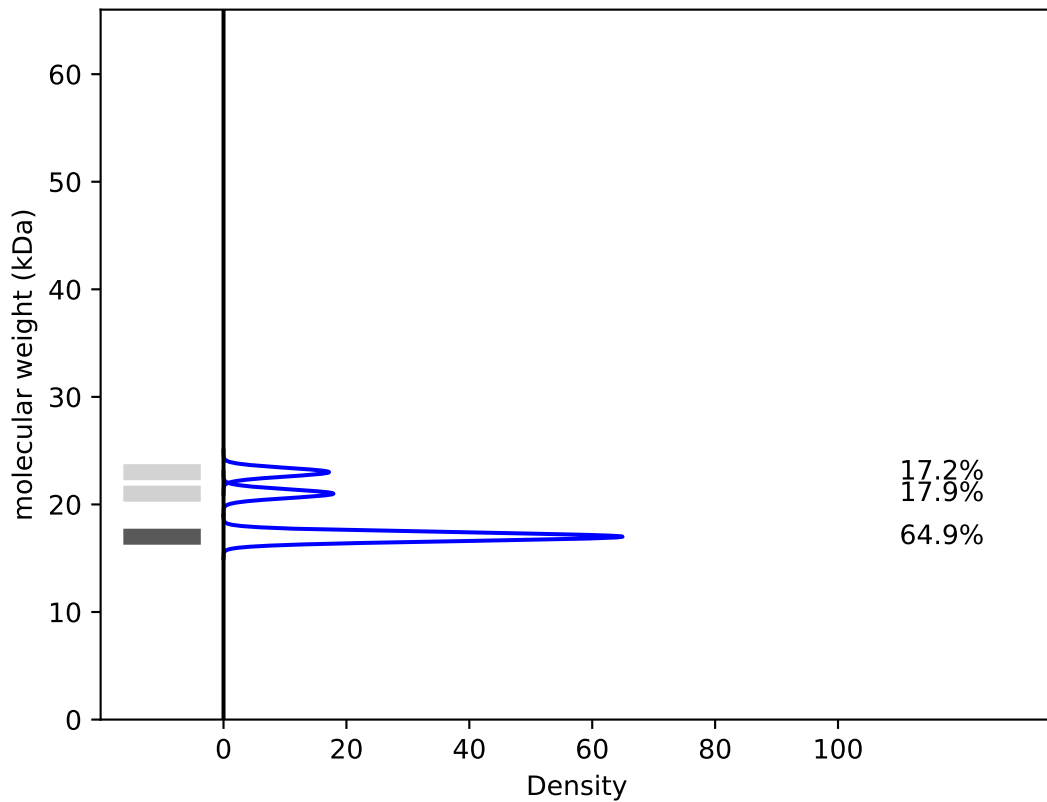



# P01116

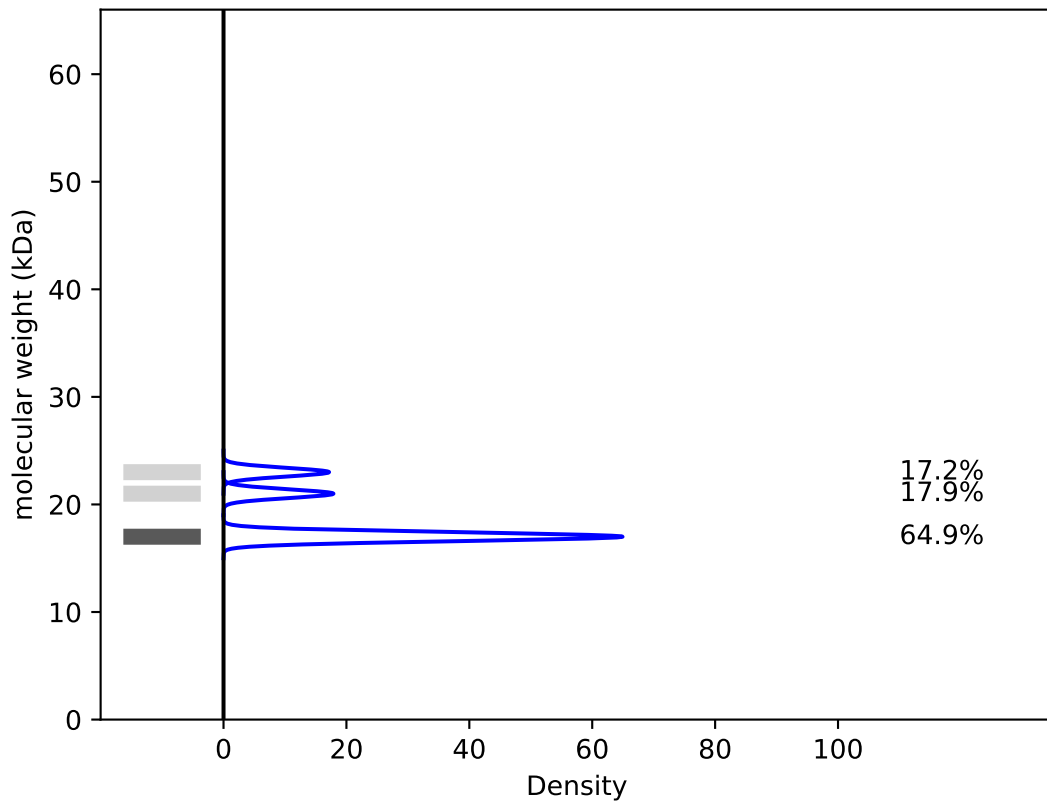

# P01112



# P01891

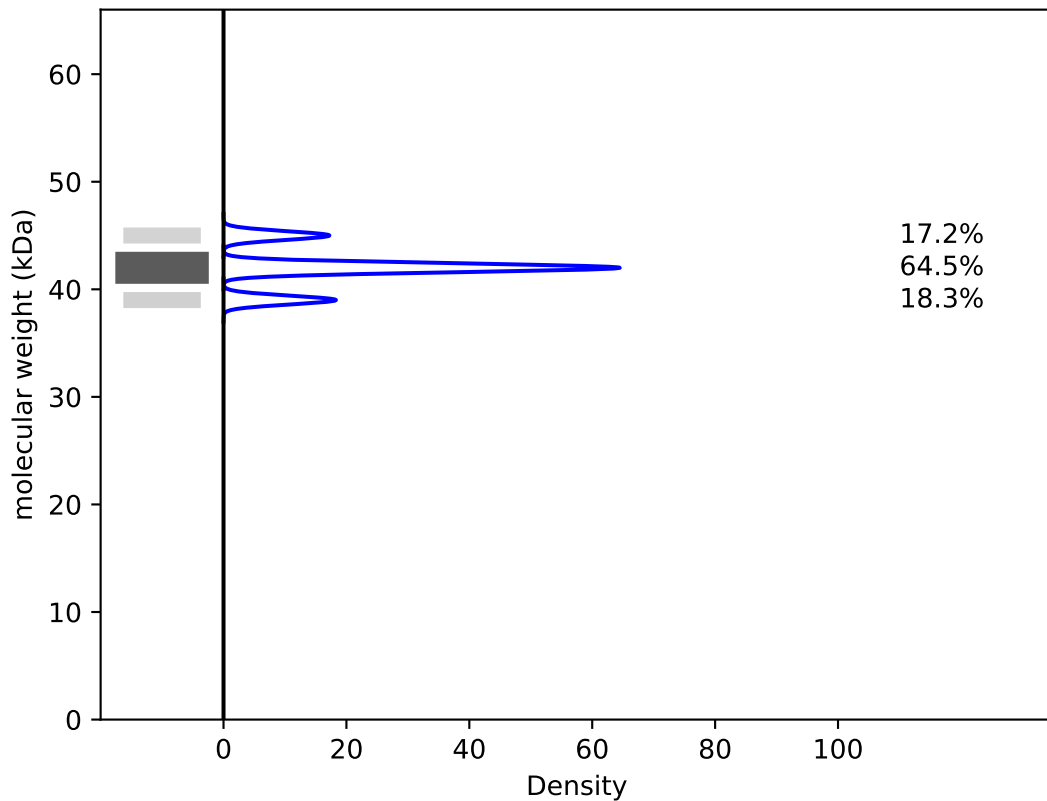

# P30459

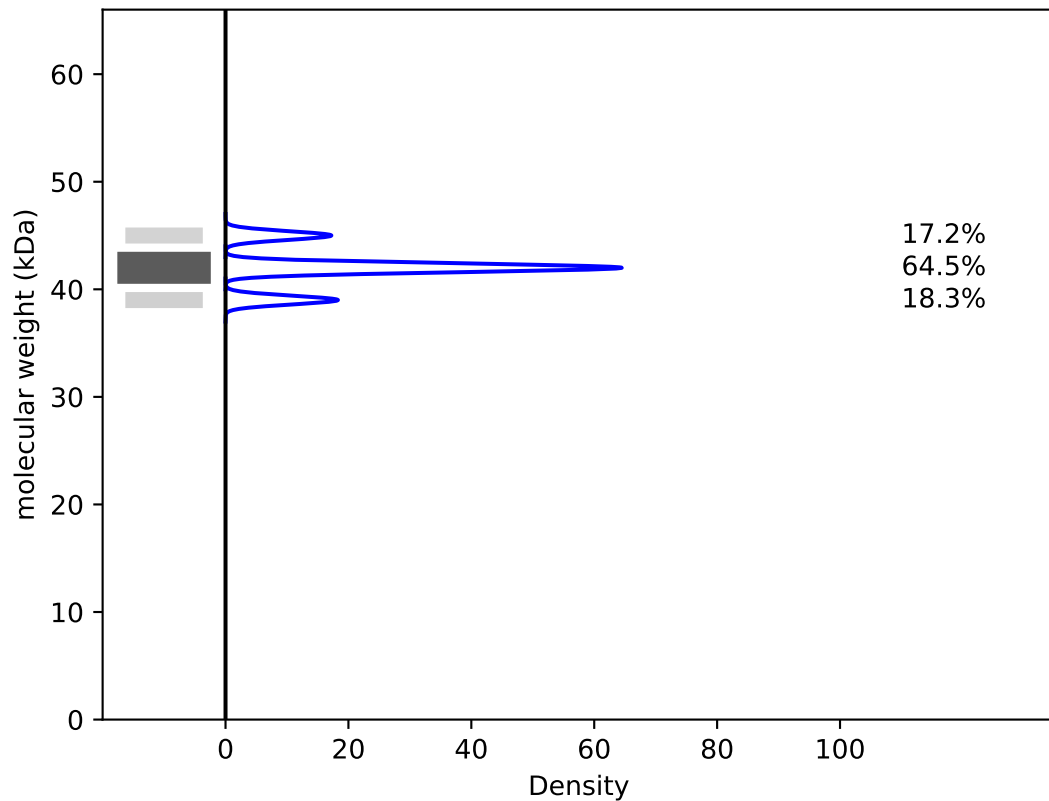

# P16189



# P16190



# P30512



# P10314





# P30511

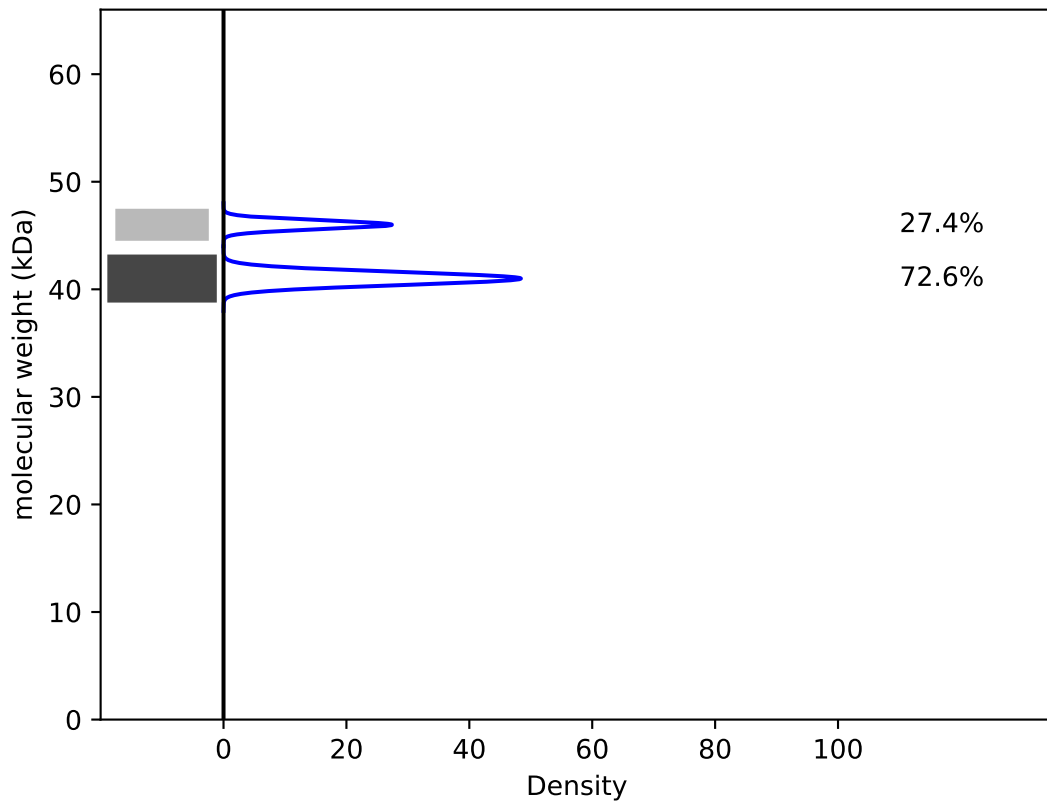

P02792



P02794



# P04040



P04062

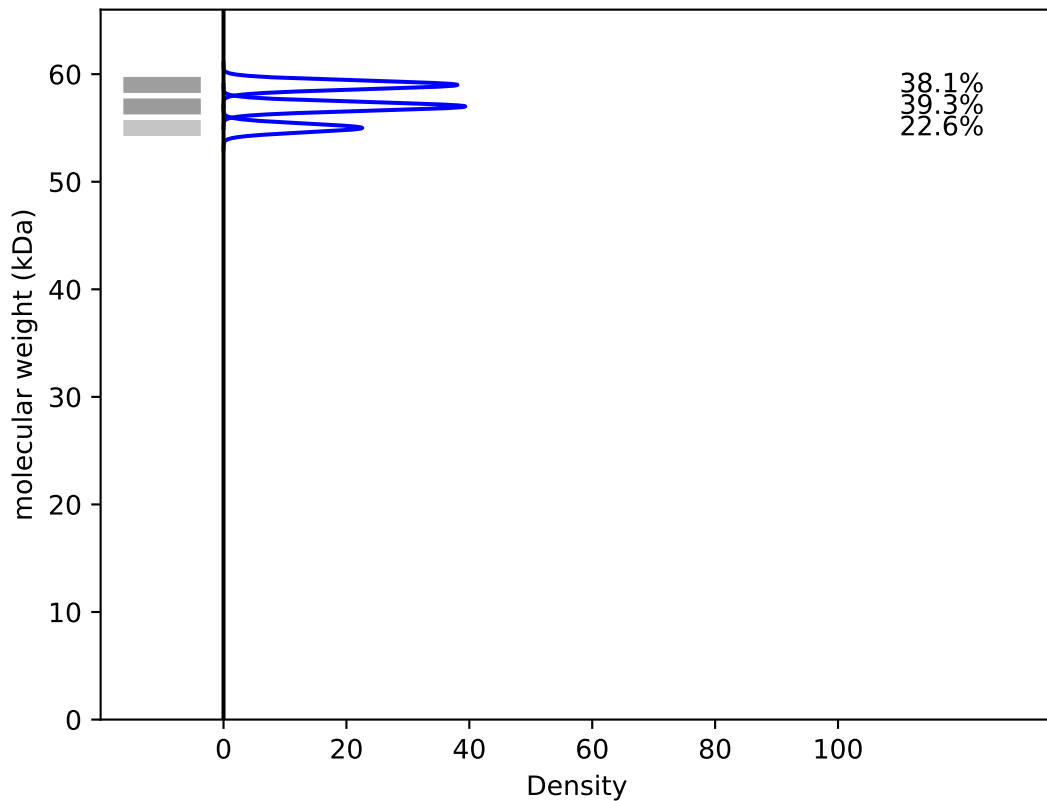

P04075

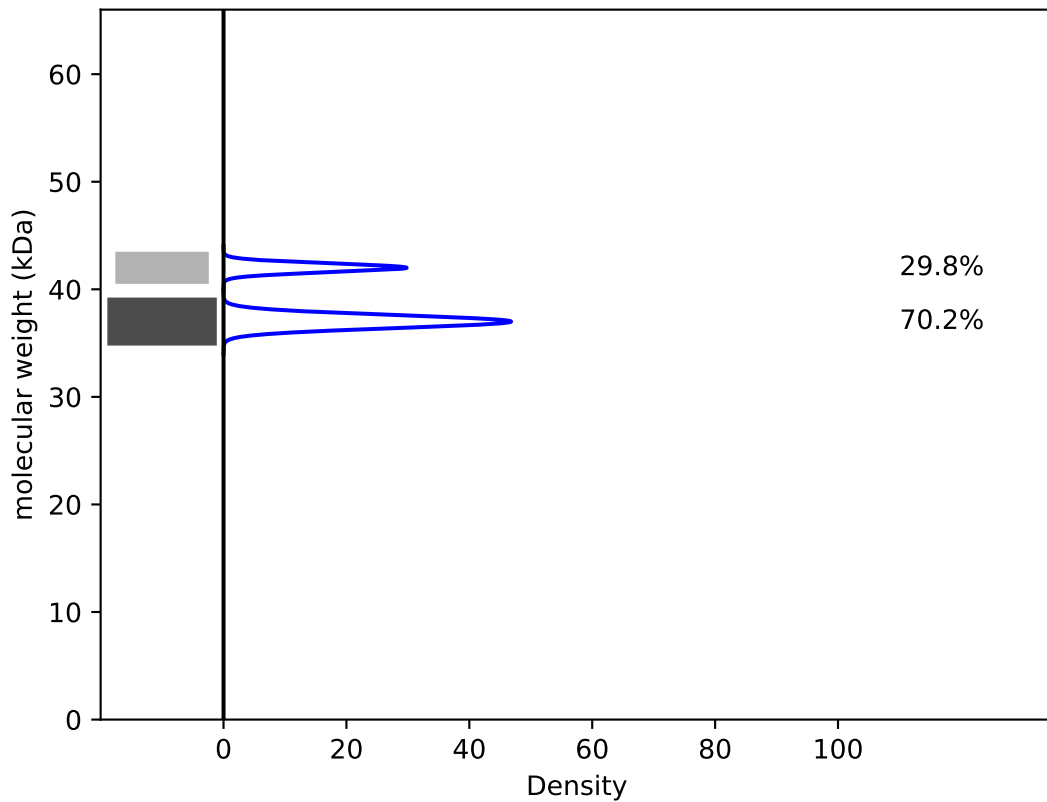

P05062



P04083

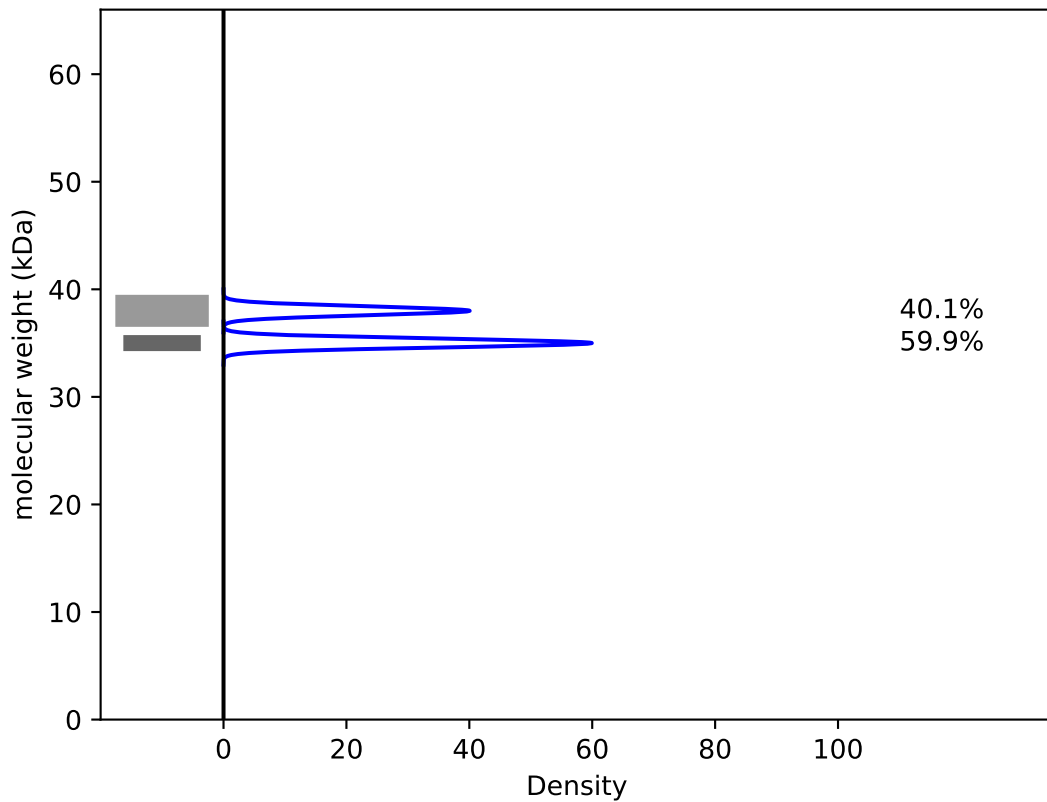



P04179

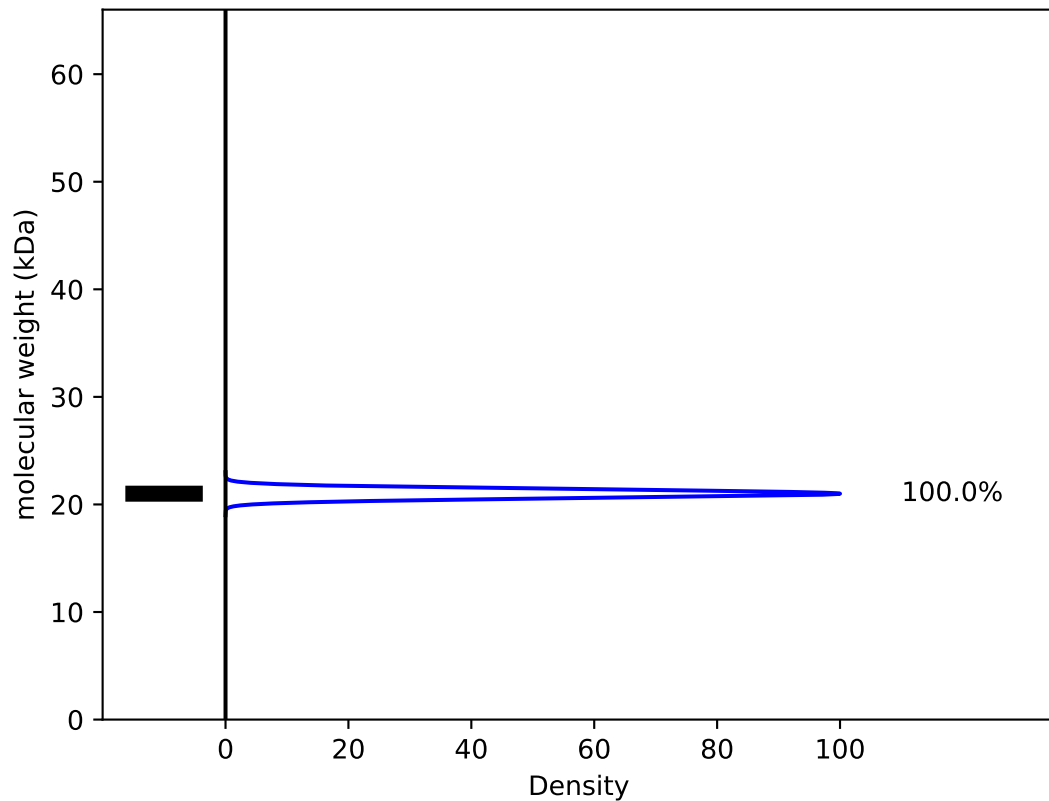

P04181

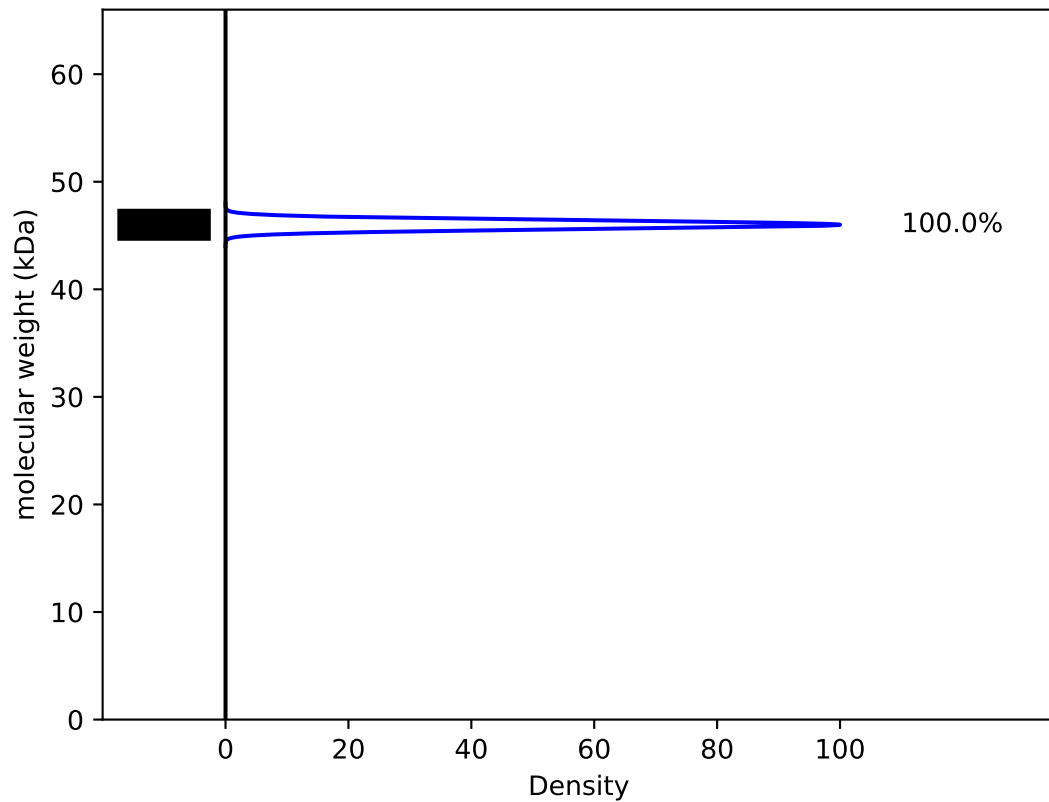

P04183

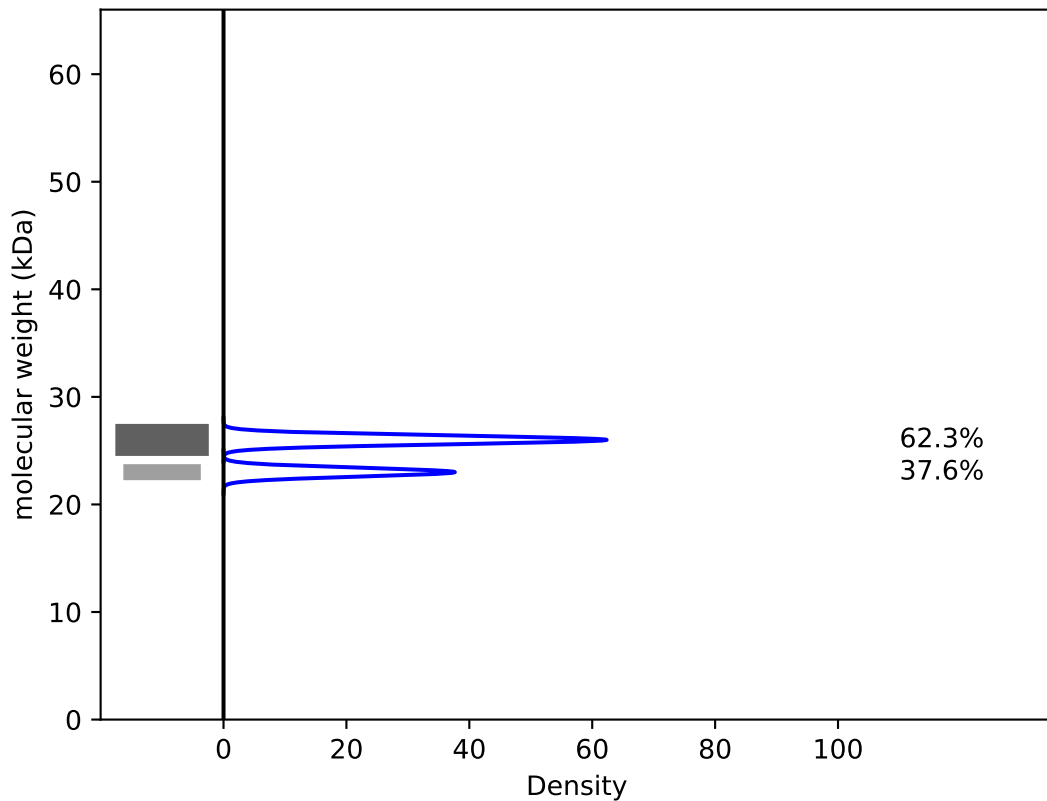

P04406

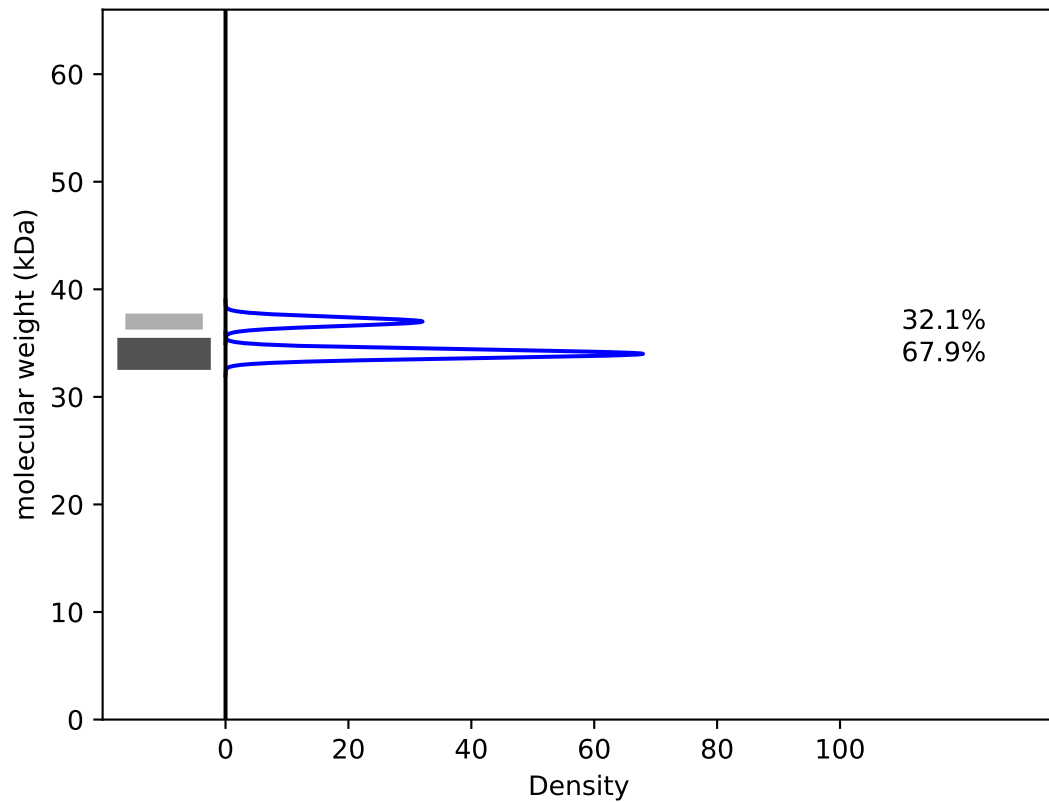

P04632



# Q96L46



P04792

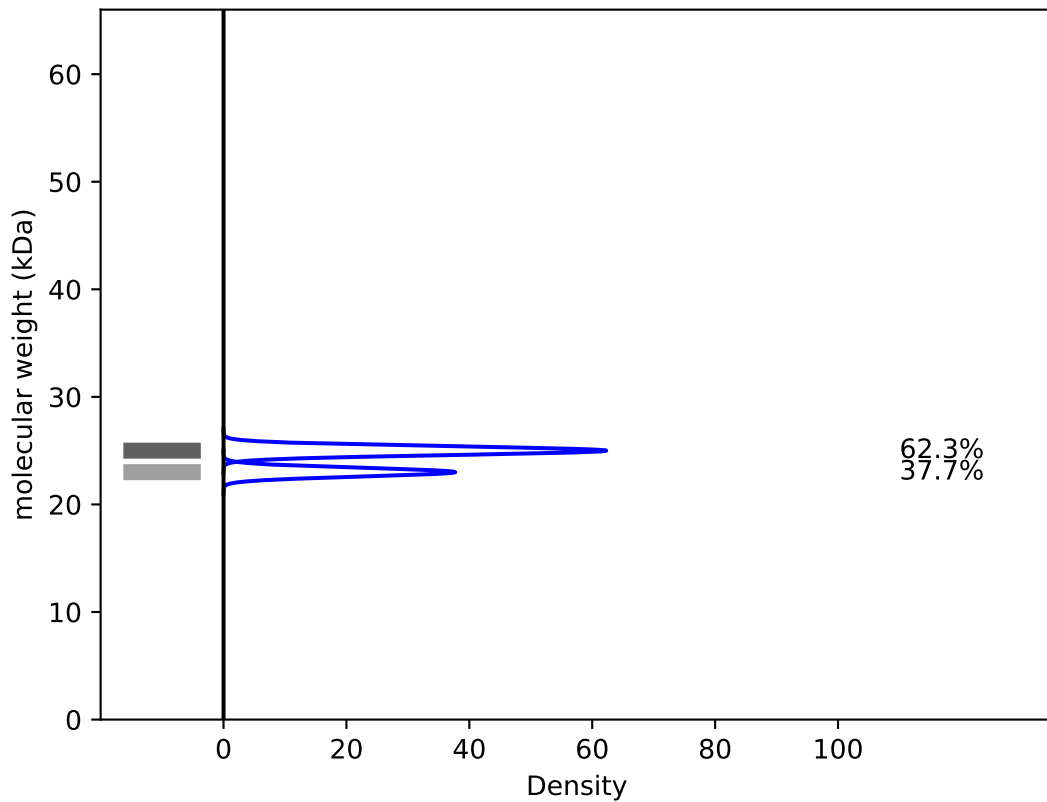

# P04818

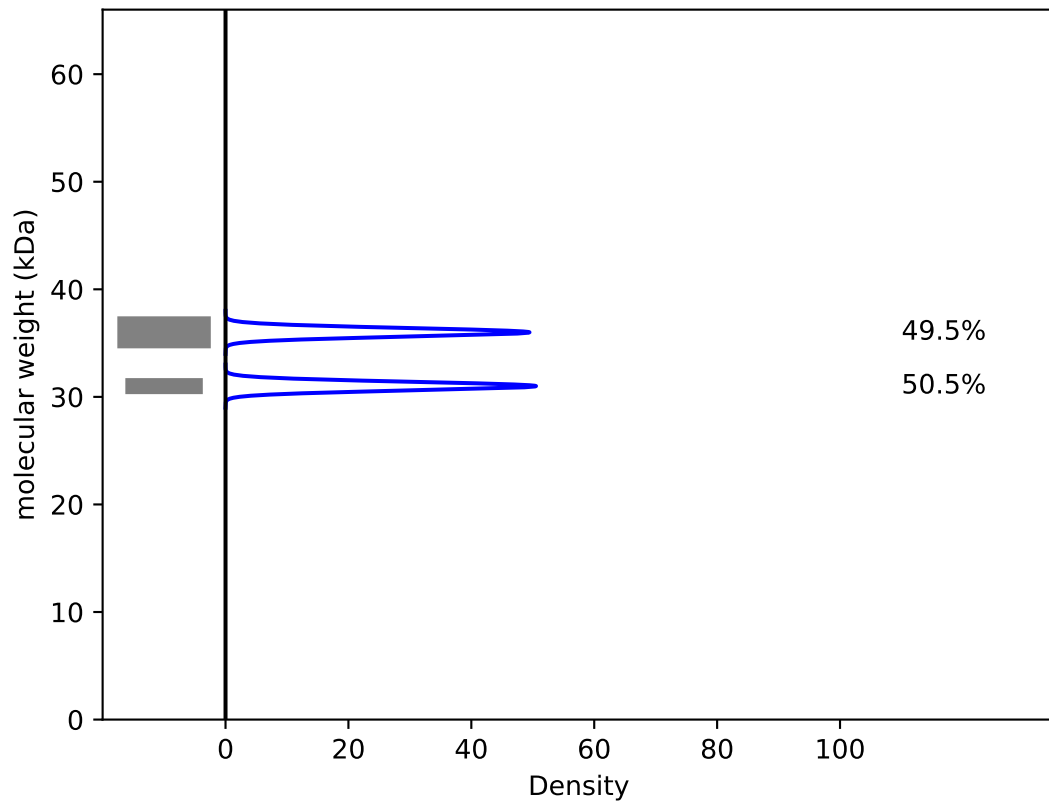



# P04899

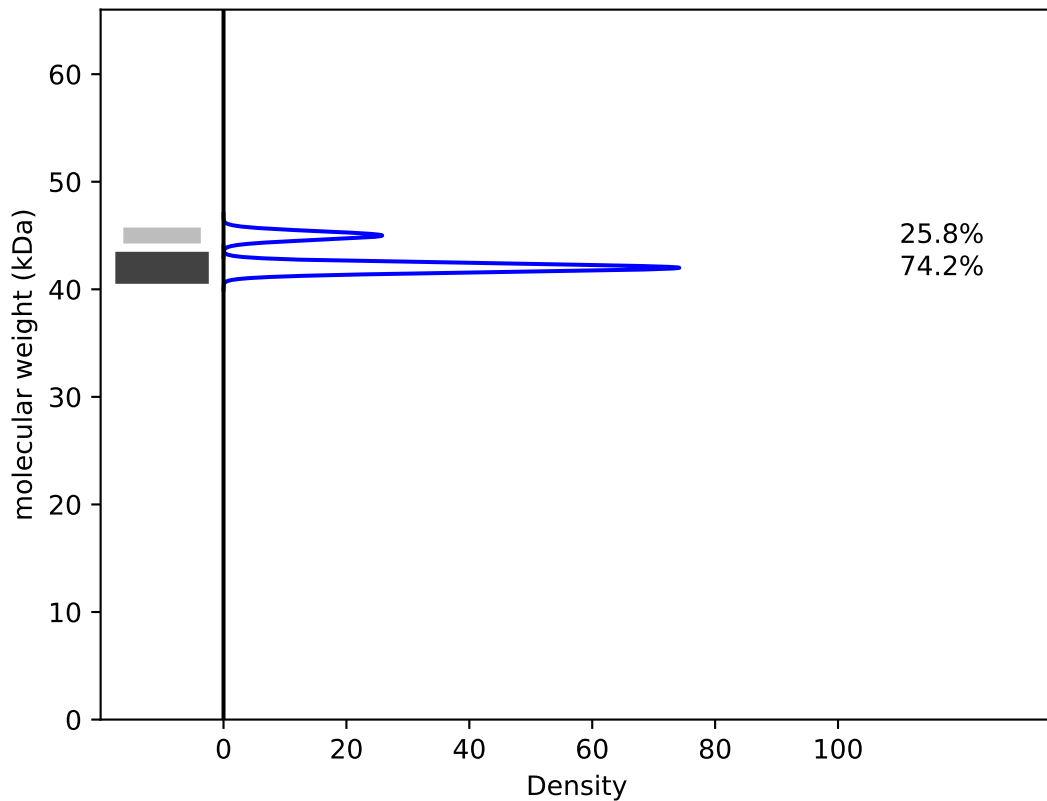

# P11488

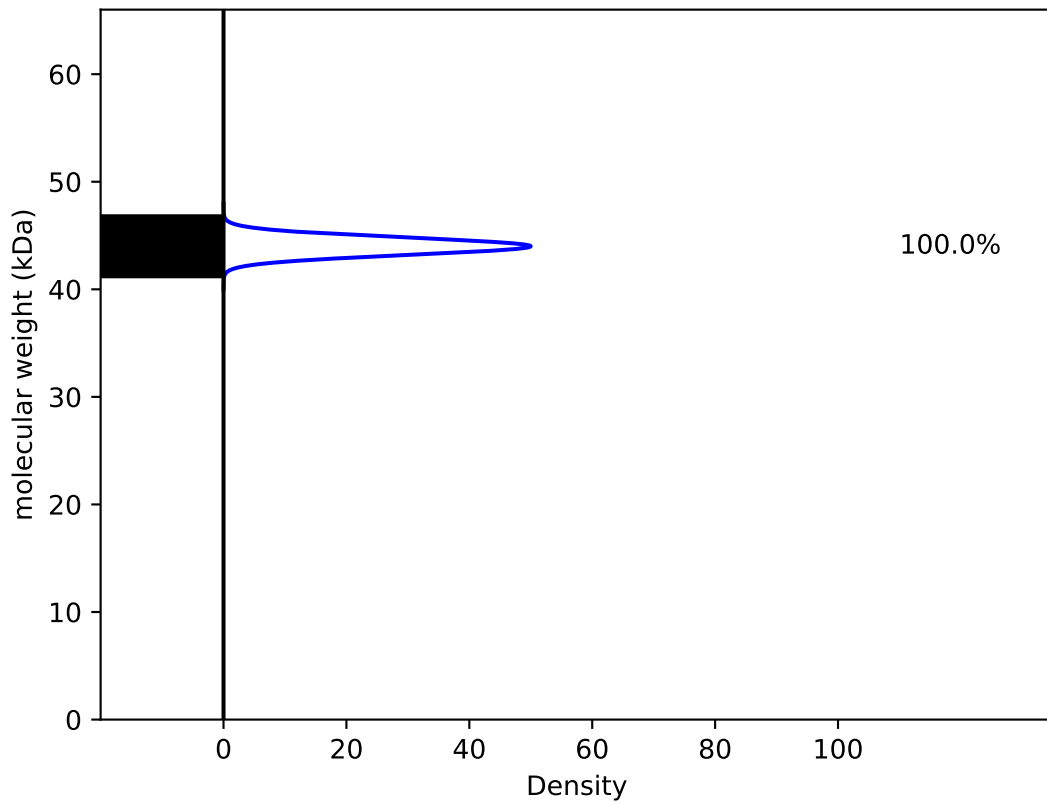

P09471



P19087



# A8MTJ3



P38405



# Q9BTM1

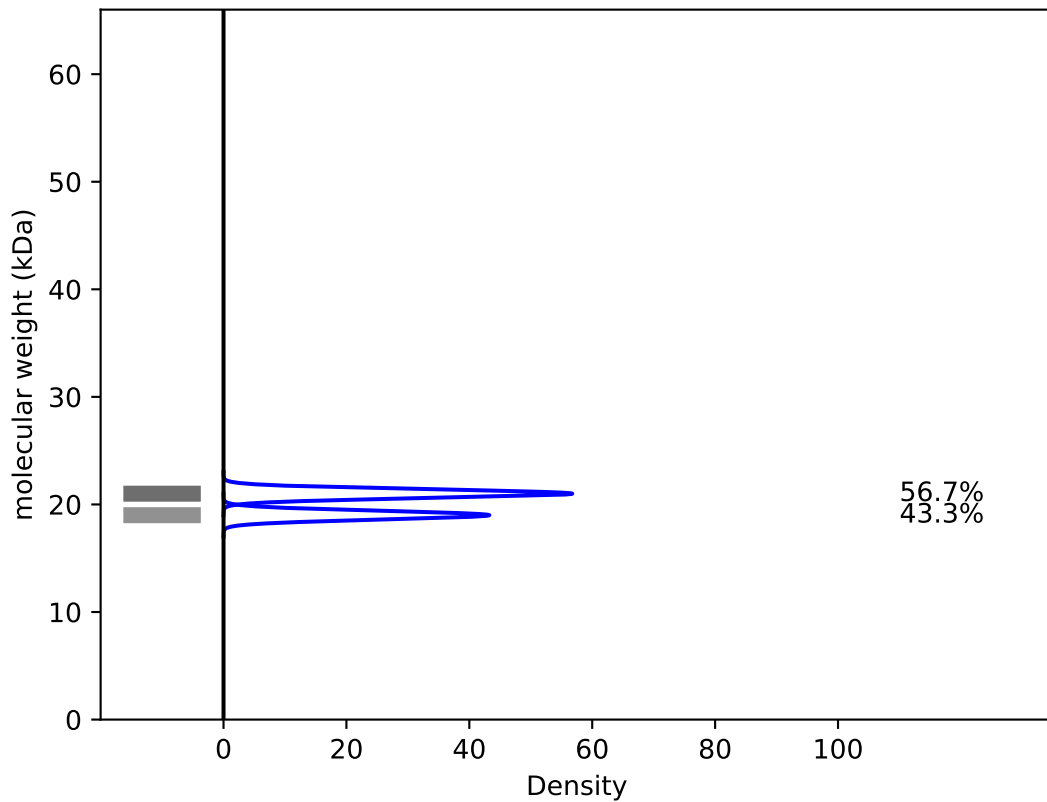

Q93077

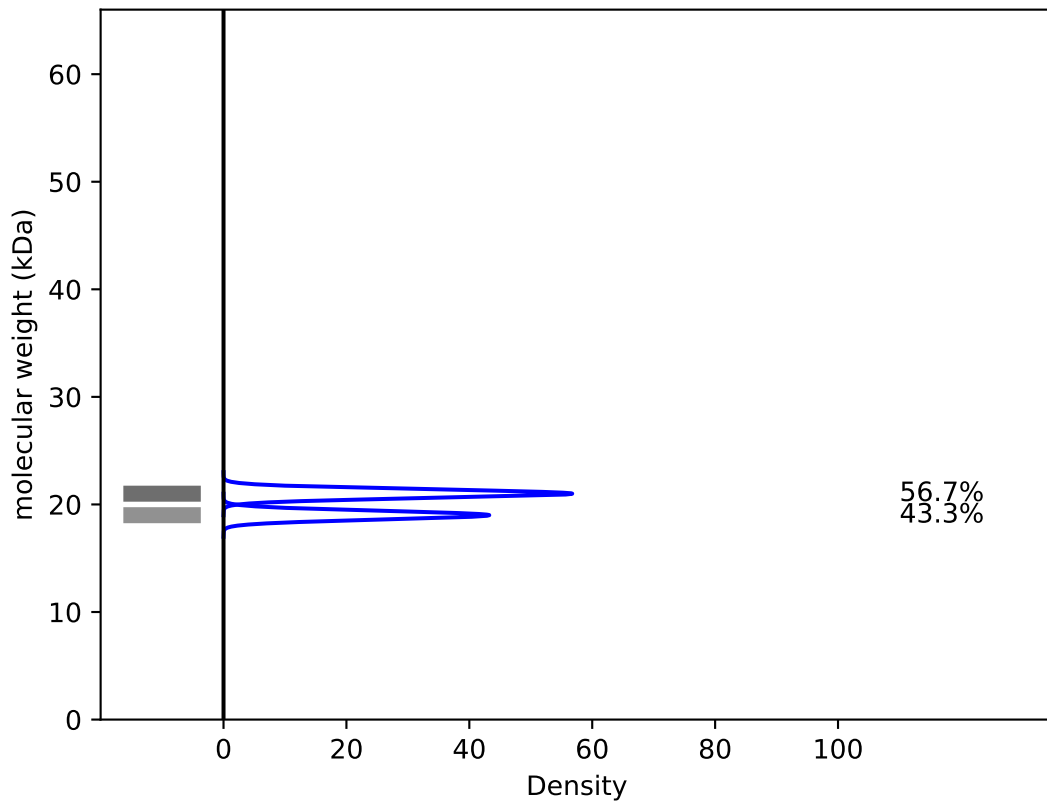



# Q7L7L0

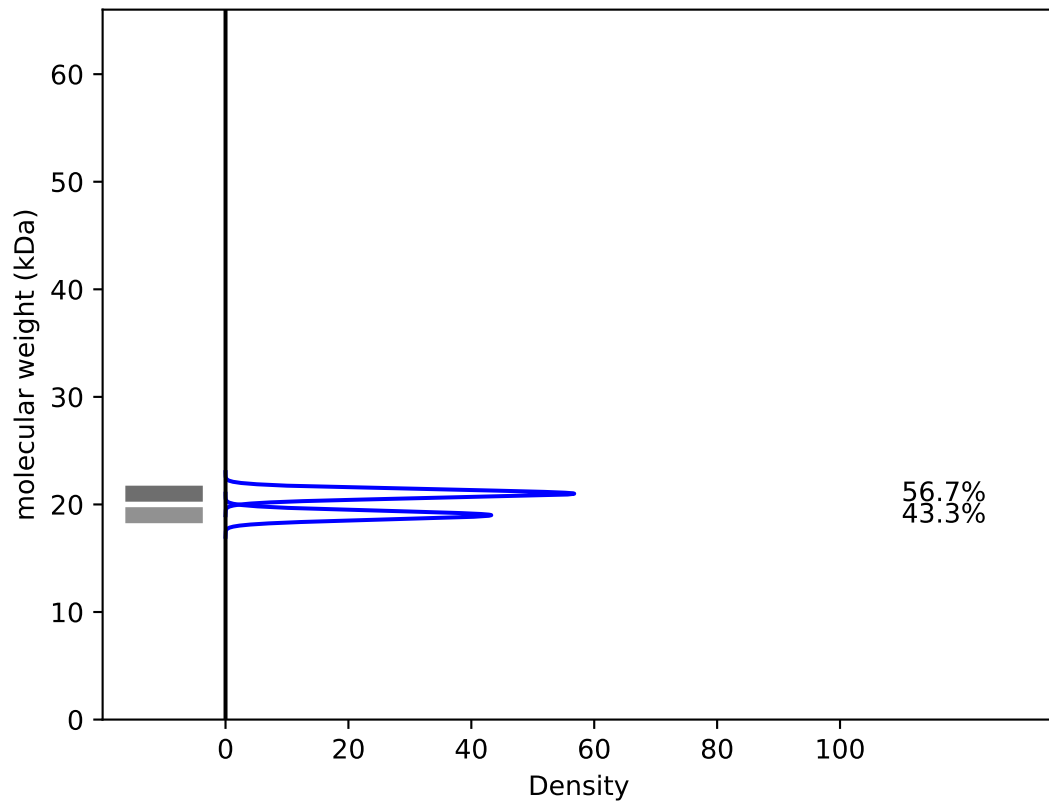

# Q6FI13



# P20671



# POC0S8



P04908

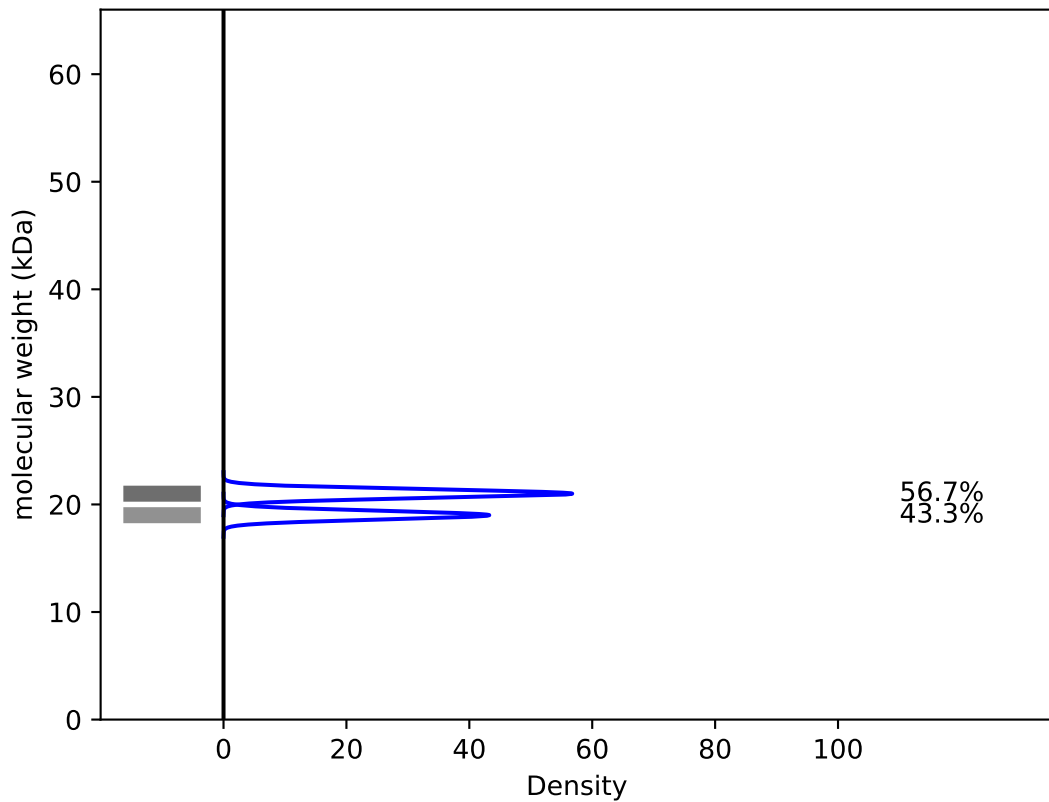

# Q96QV6



# P16104

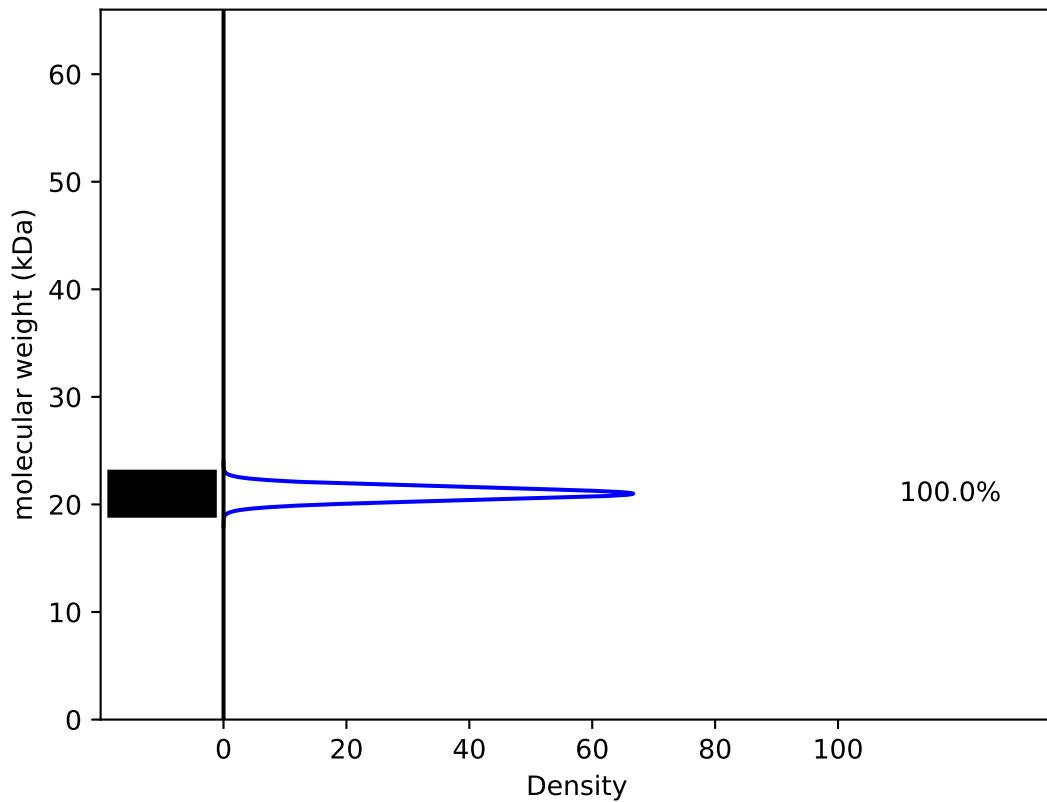

P05091





P00352

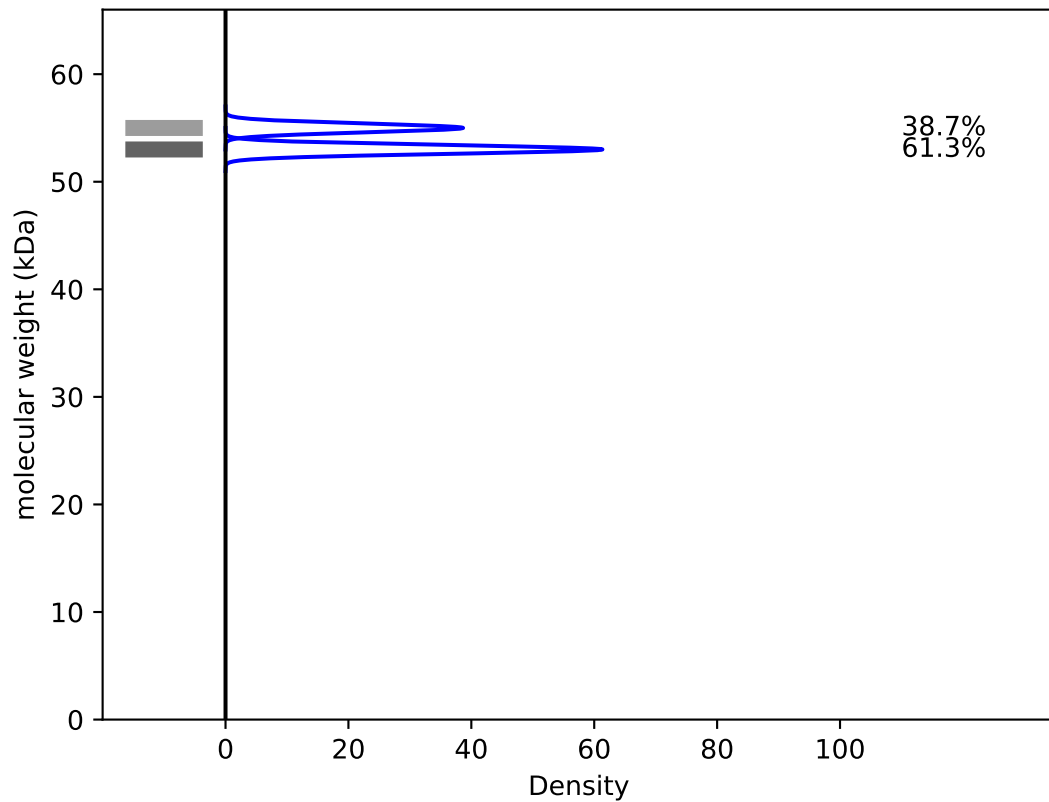

# P47895



O94788

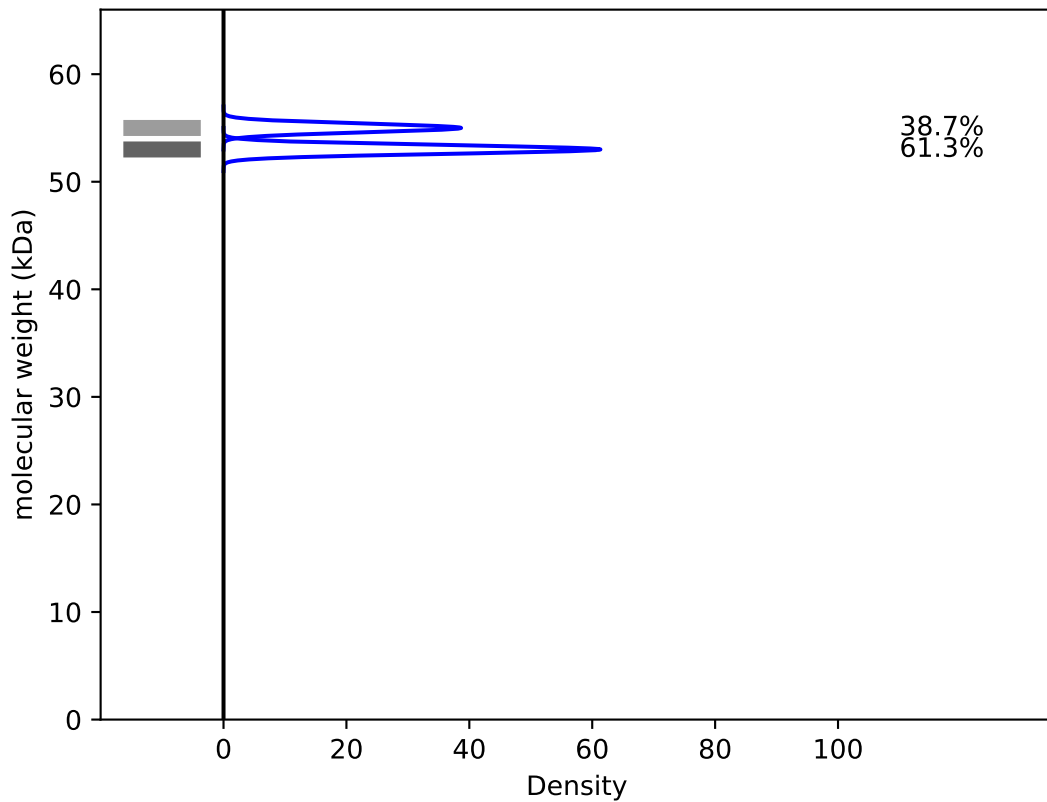

# P05141

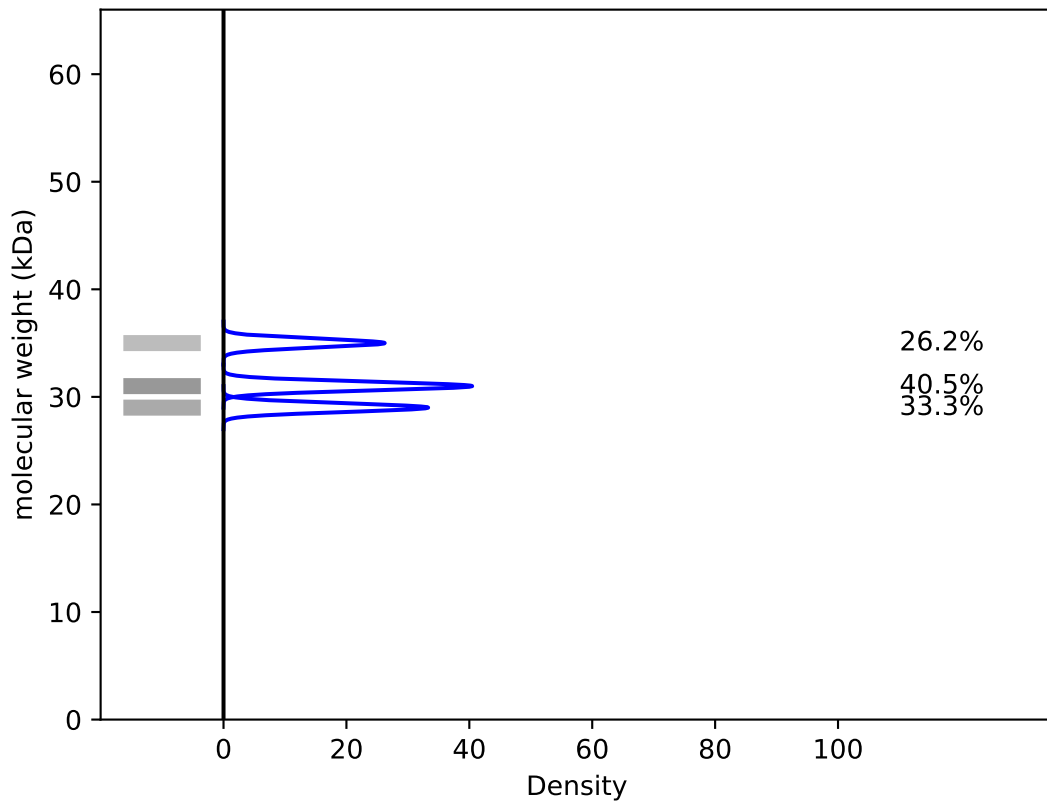

# Q9H0C2

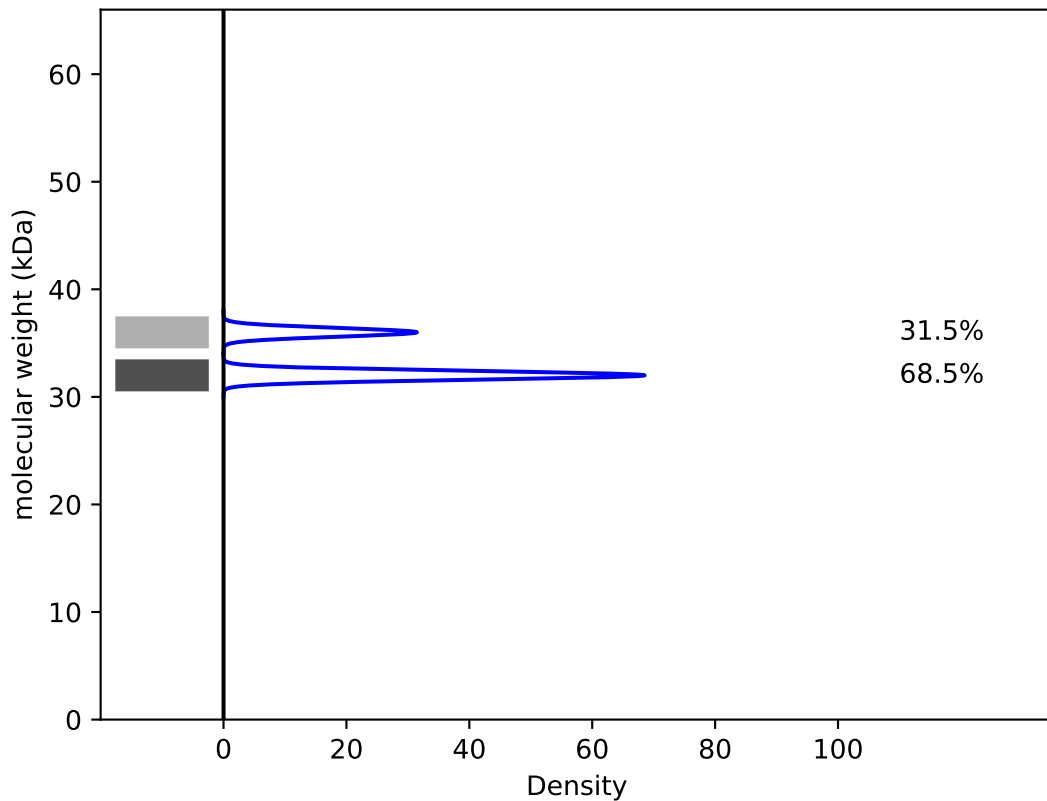

P05198



P05388

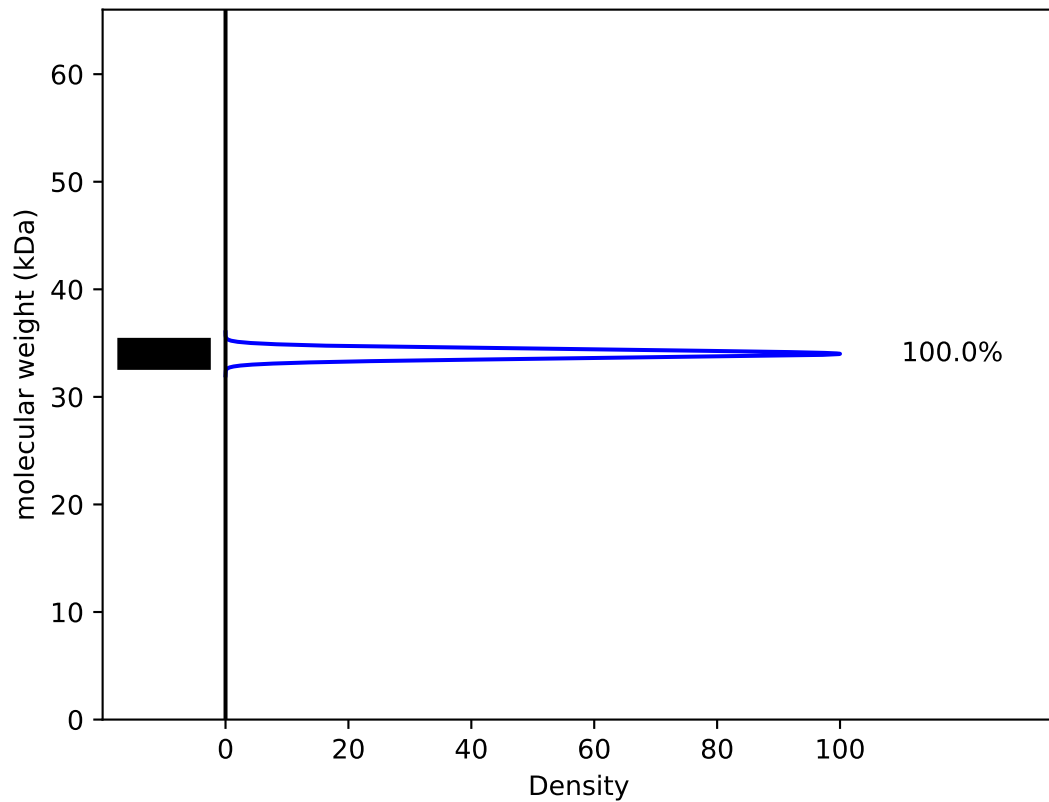

# Q8NHW5

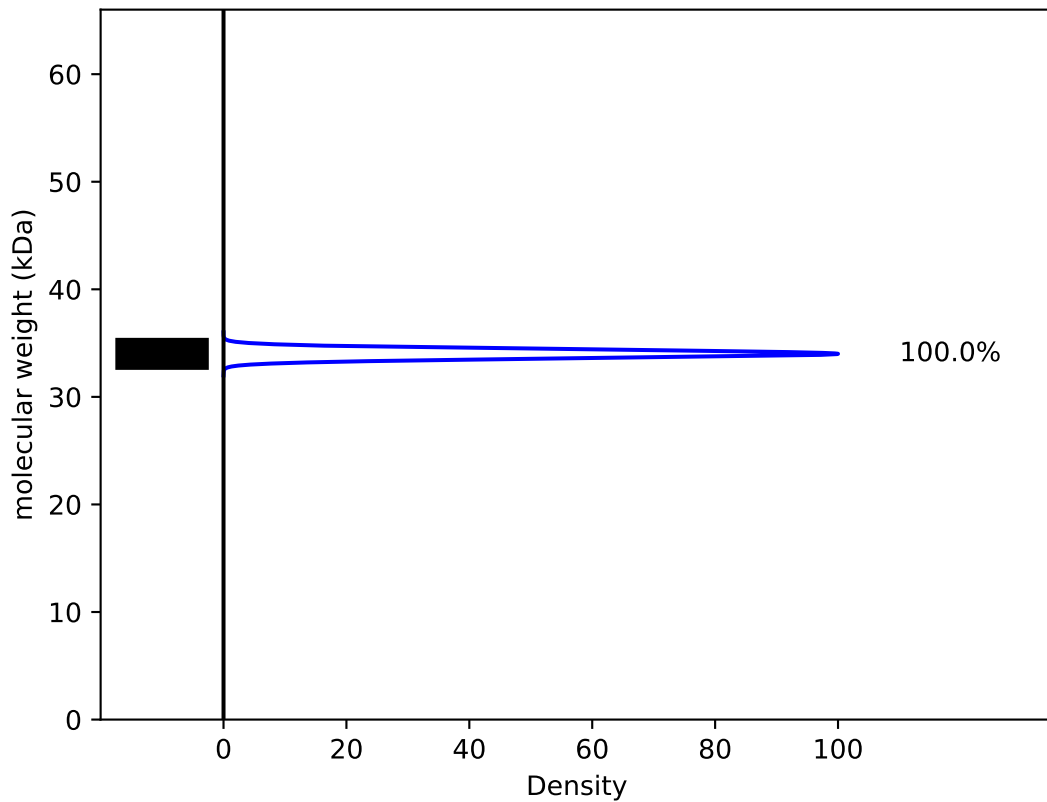



P05455



# P05534

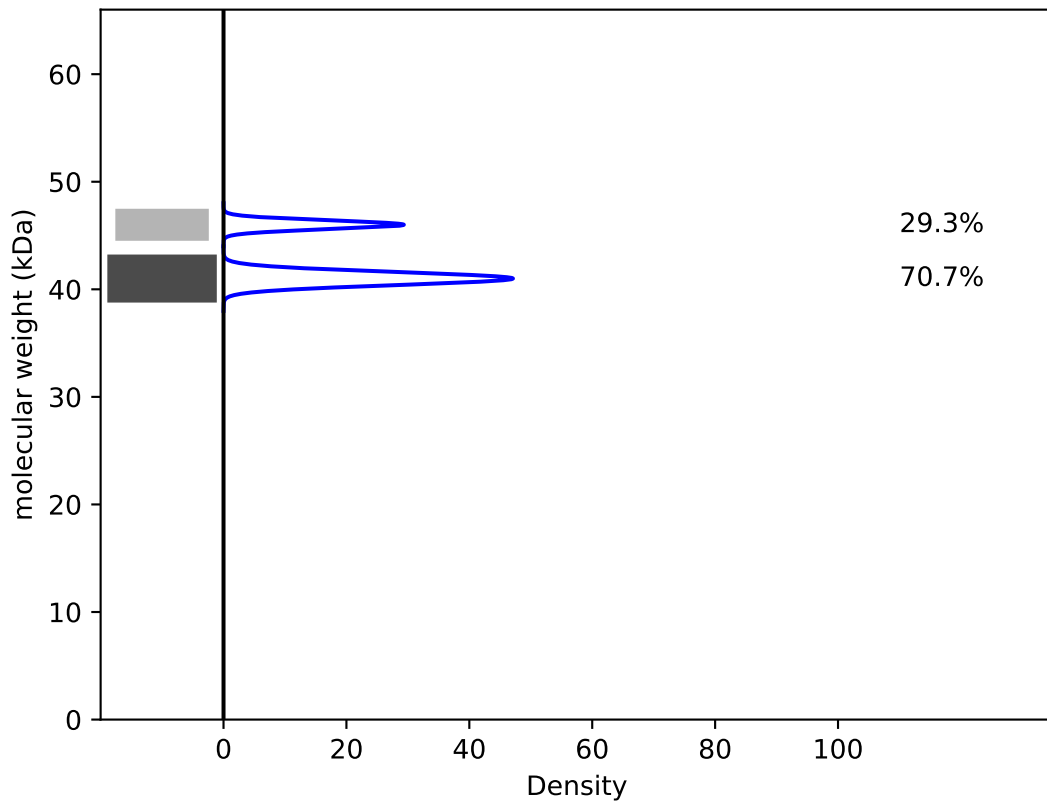

# P30447

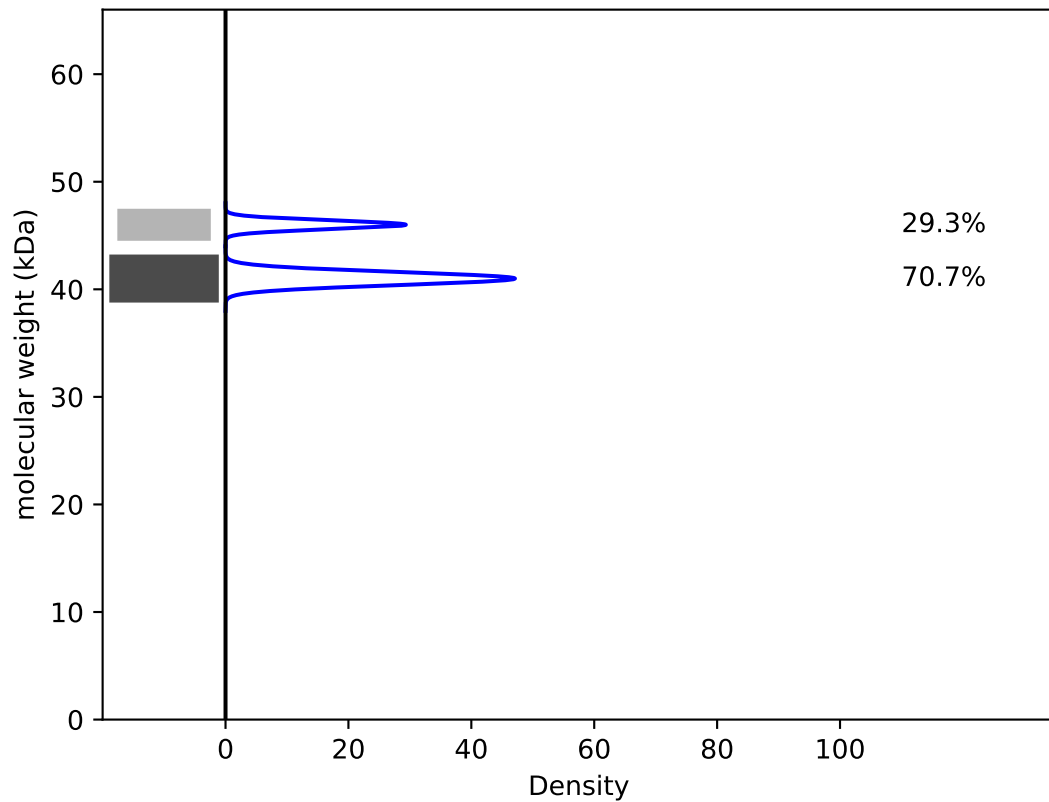

# Q14525



# Q15323



# P06132

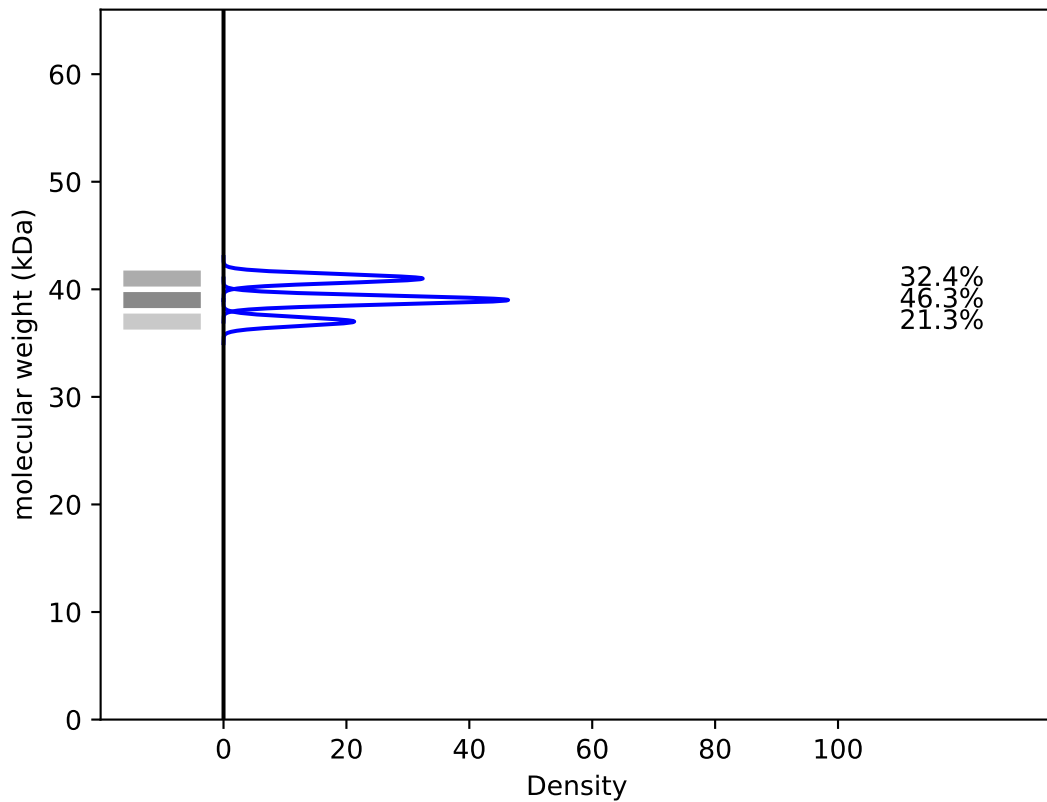

P06493

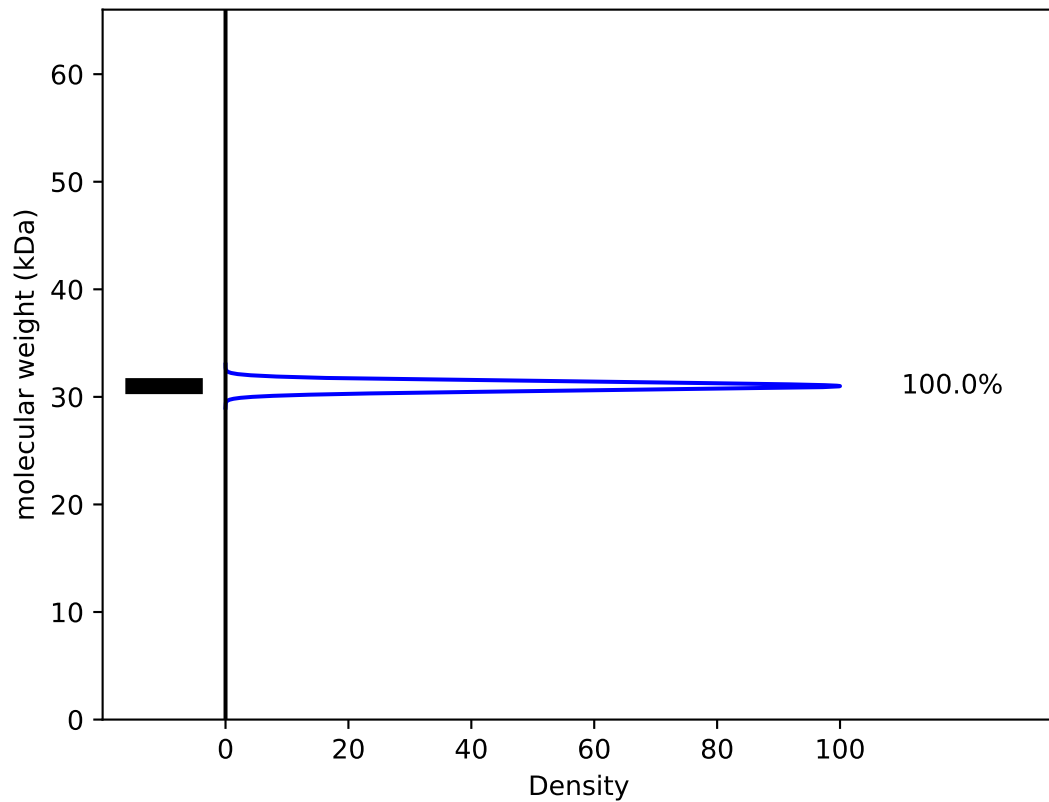

P06730

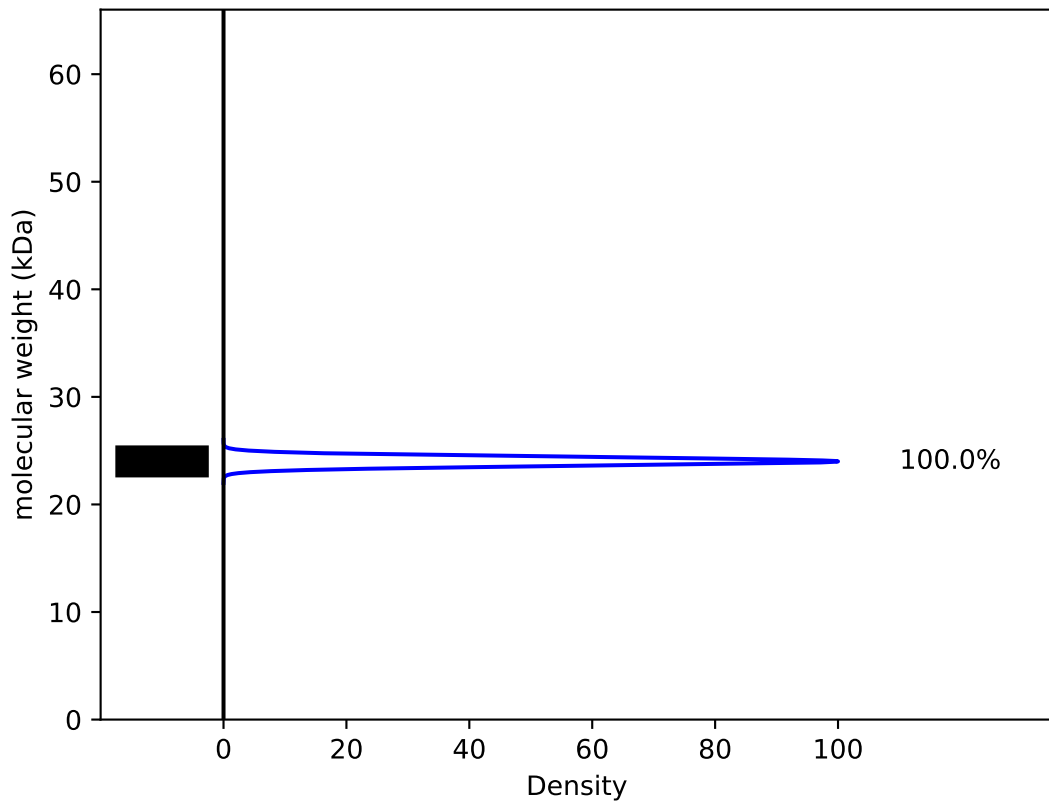



P06733



P06748

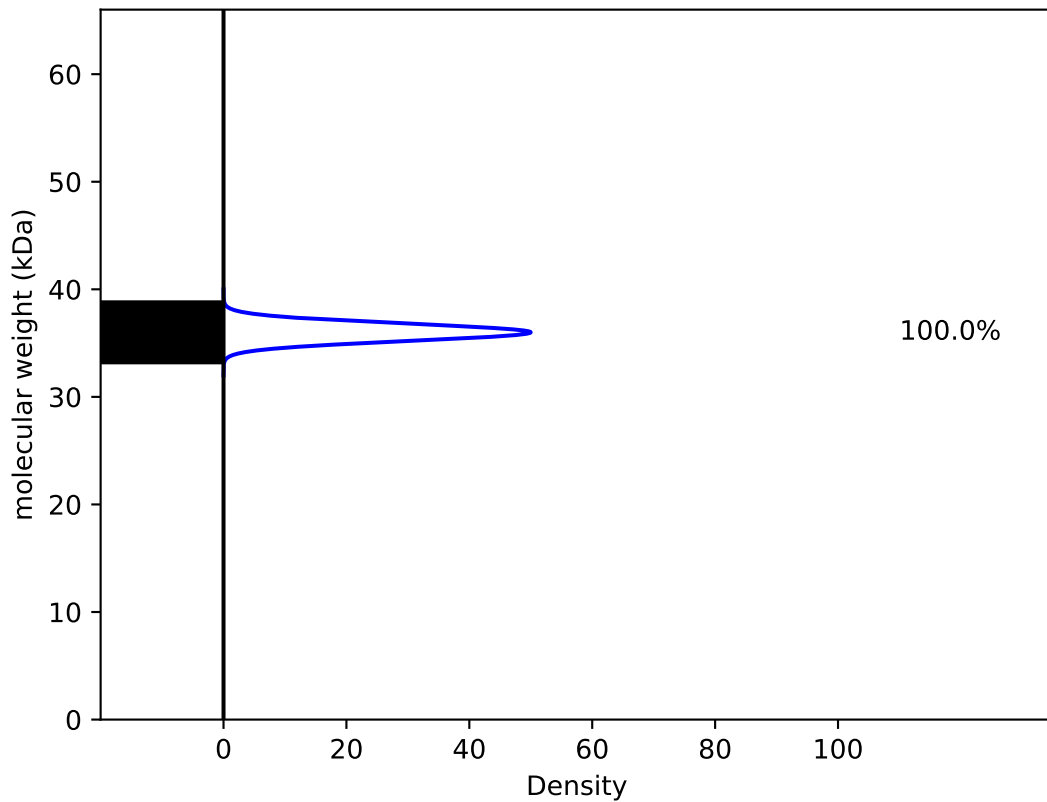

P06753

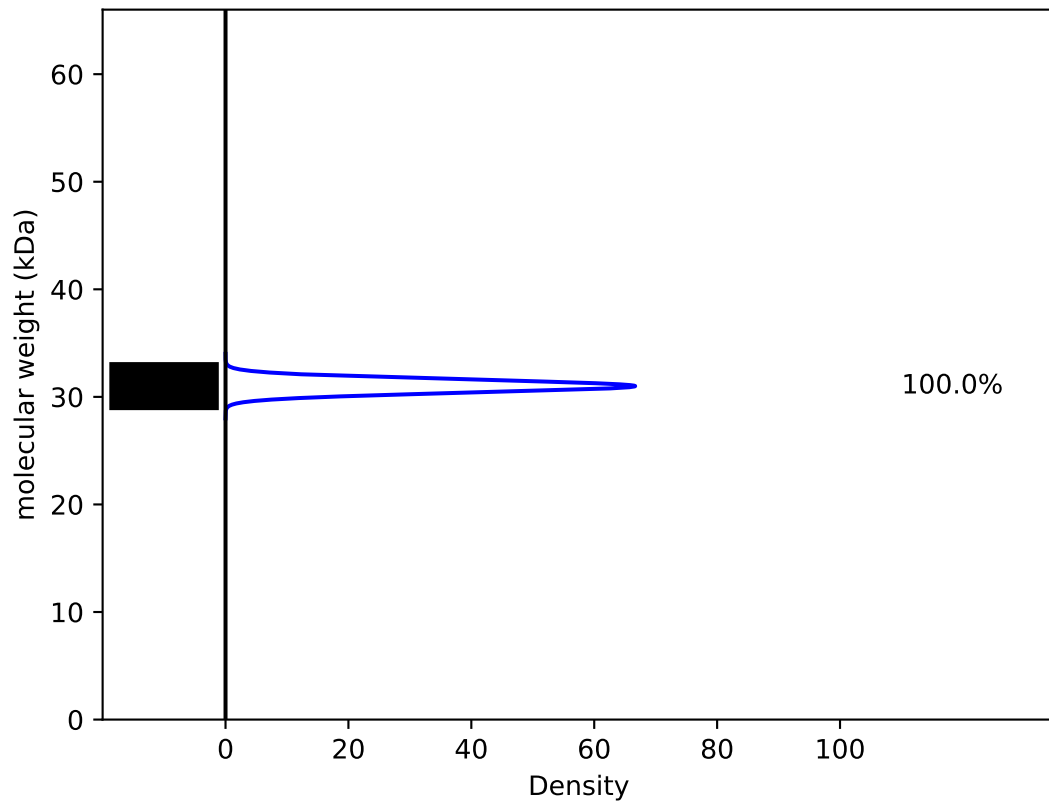

P07195



P07203

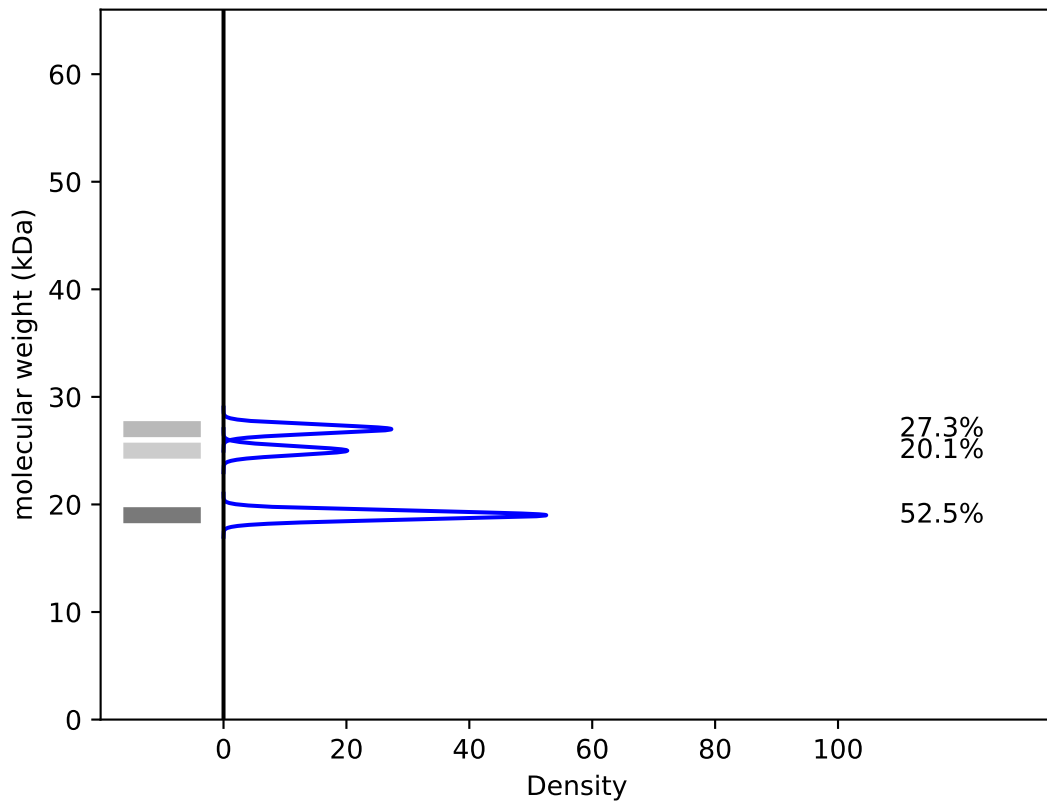

P07237



P07339

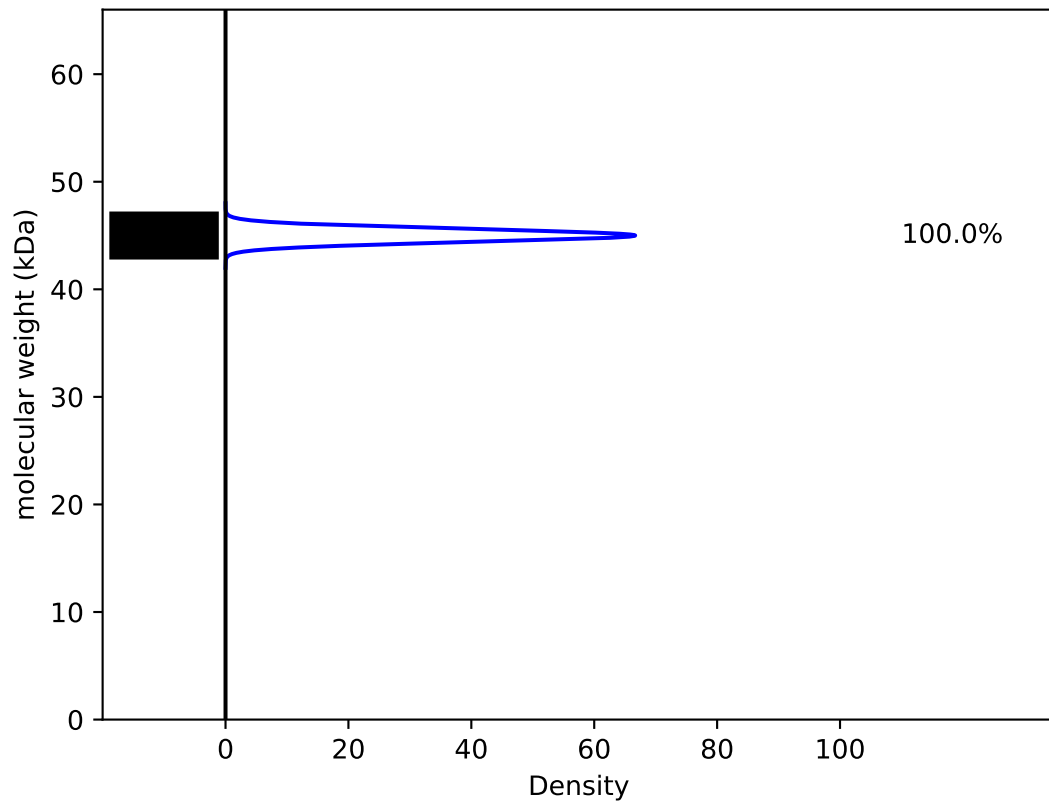

P07355

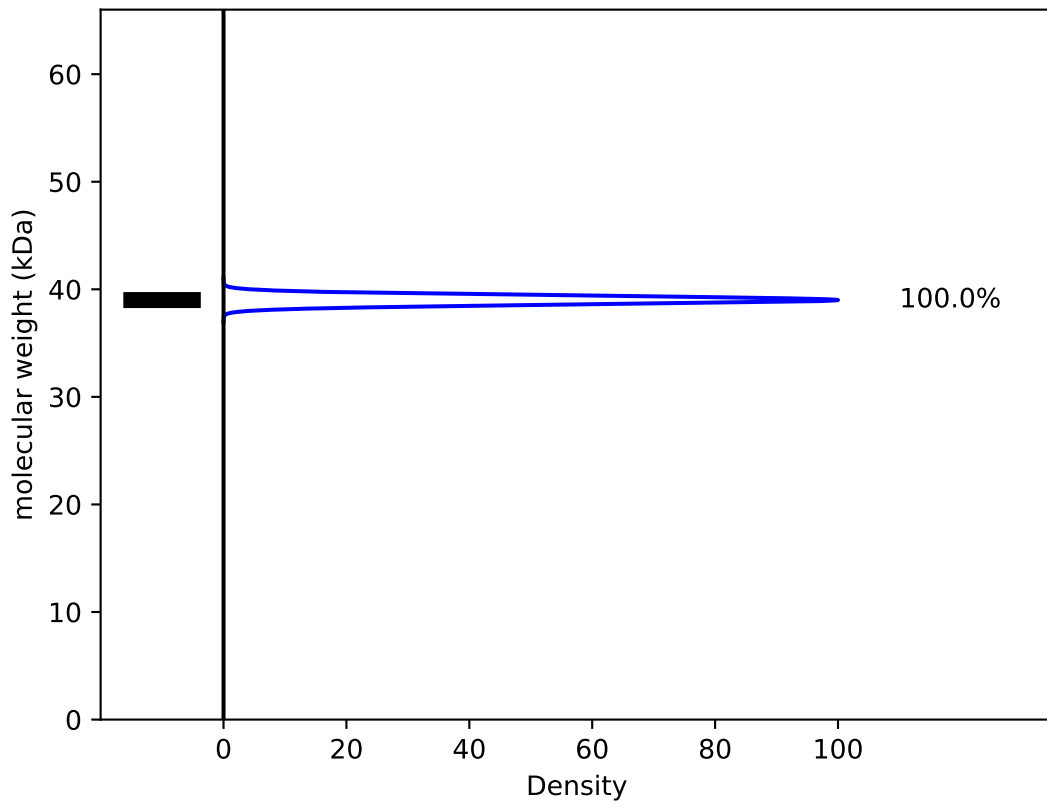



# A6NMY6



P07437

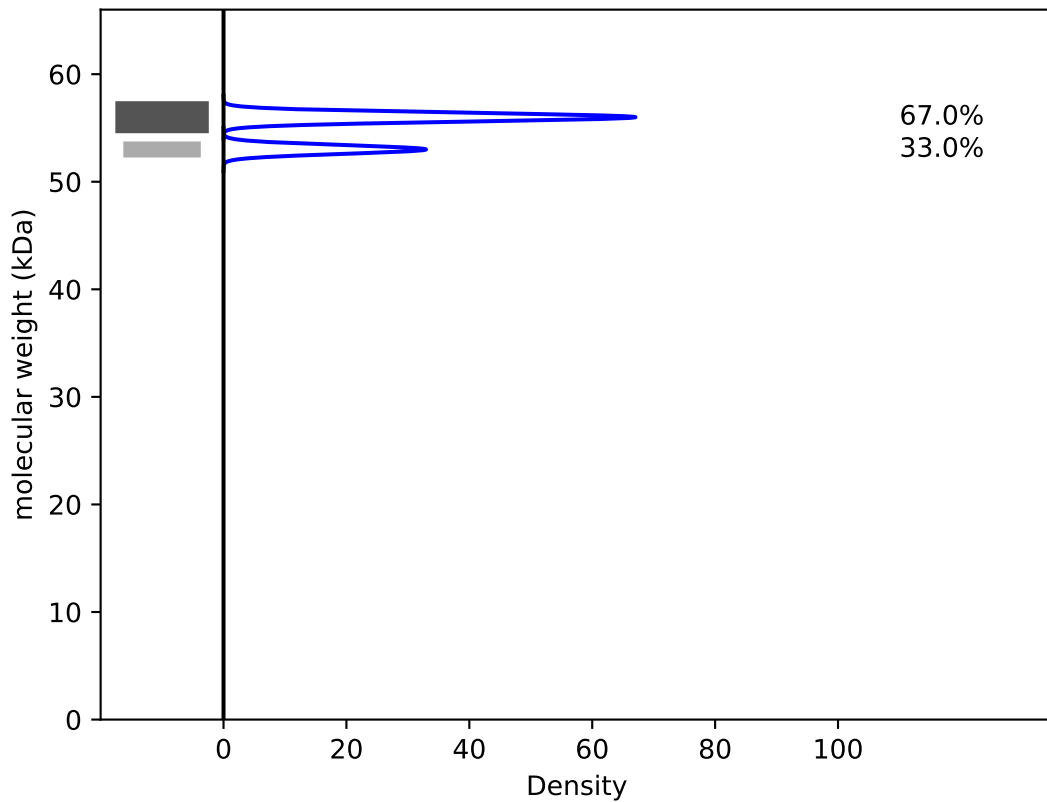

# A6NNZ2



Q9H4B7



# P07711

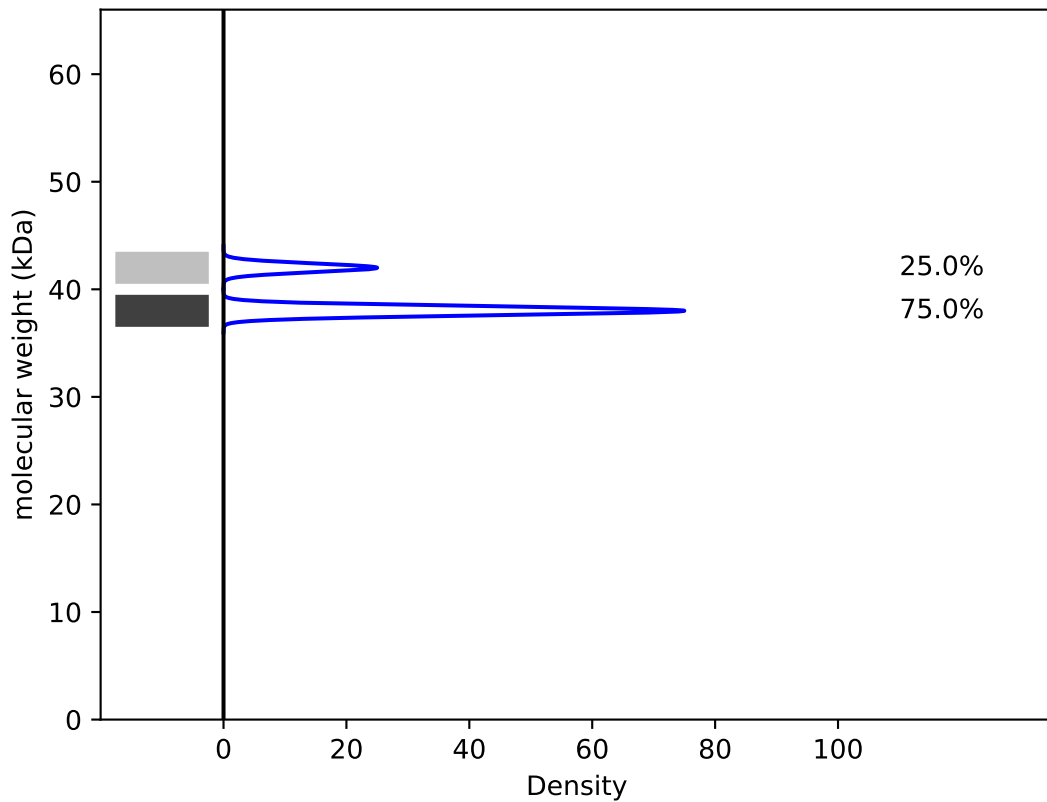

# P43235

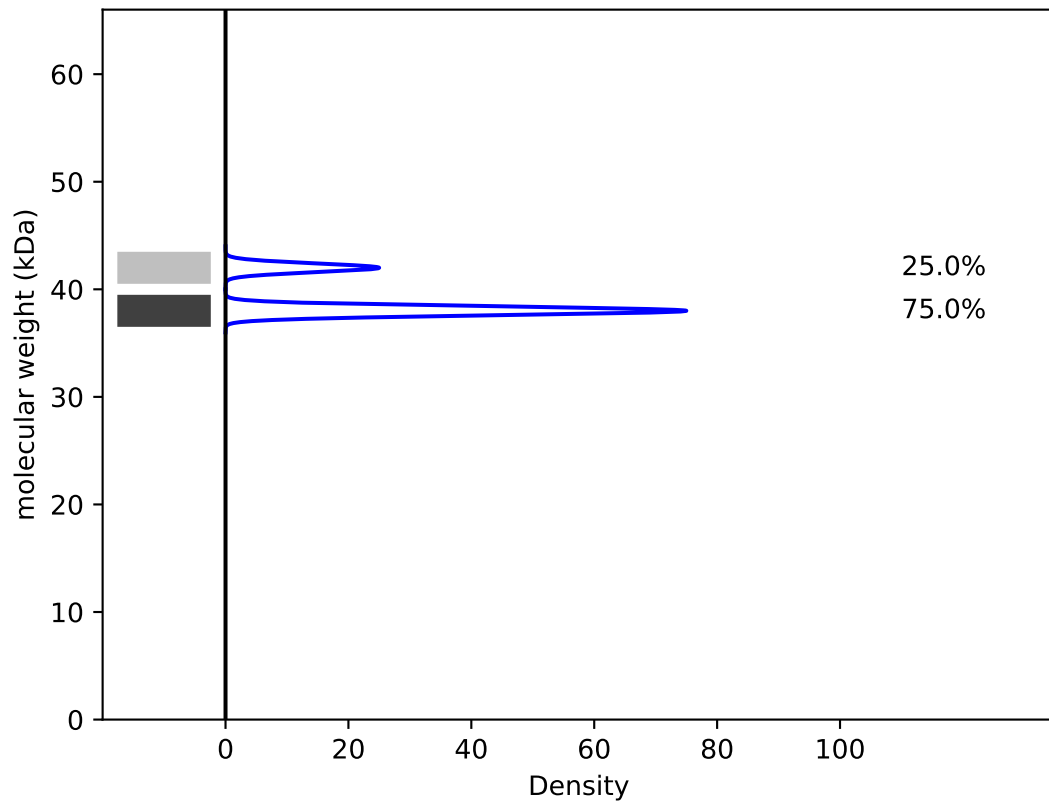

# O60911



P07737

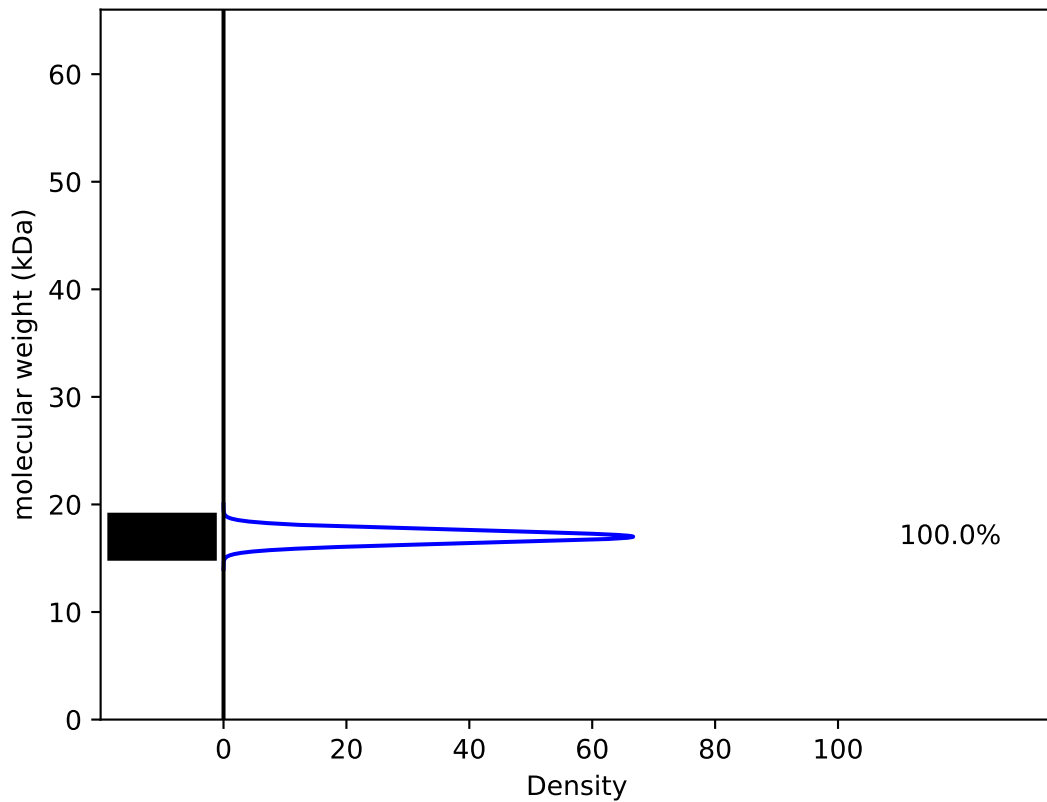



P07741

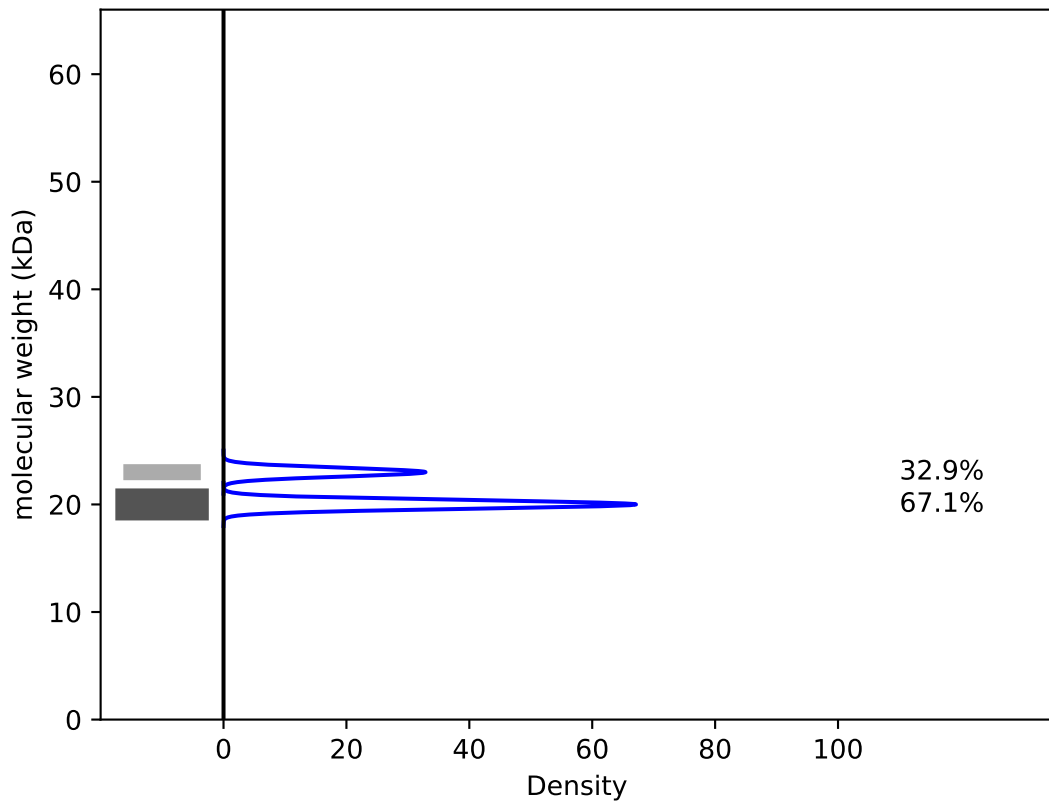

# Q58FG1

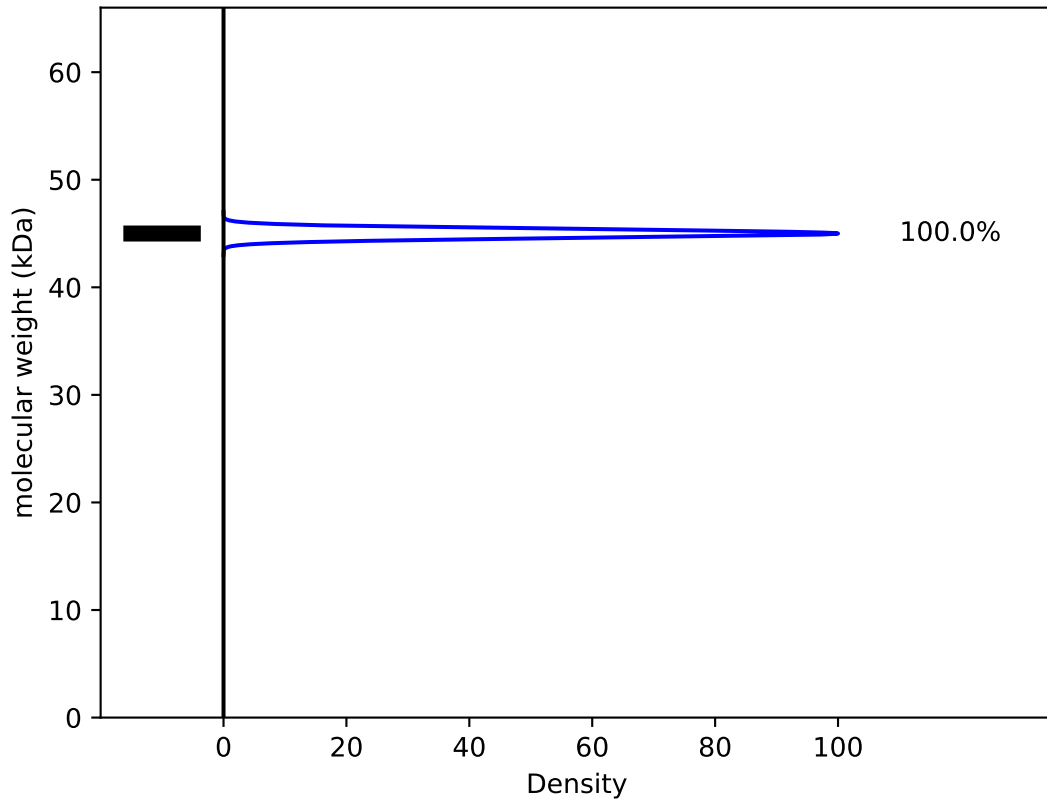

P07910



# PODMR1



O60812

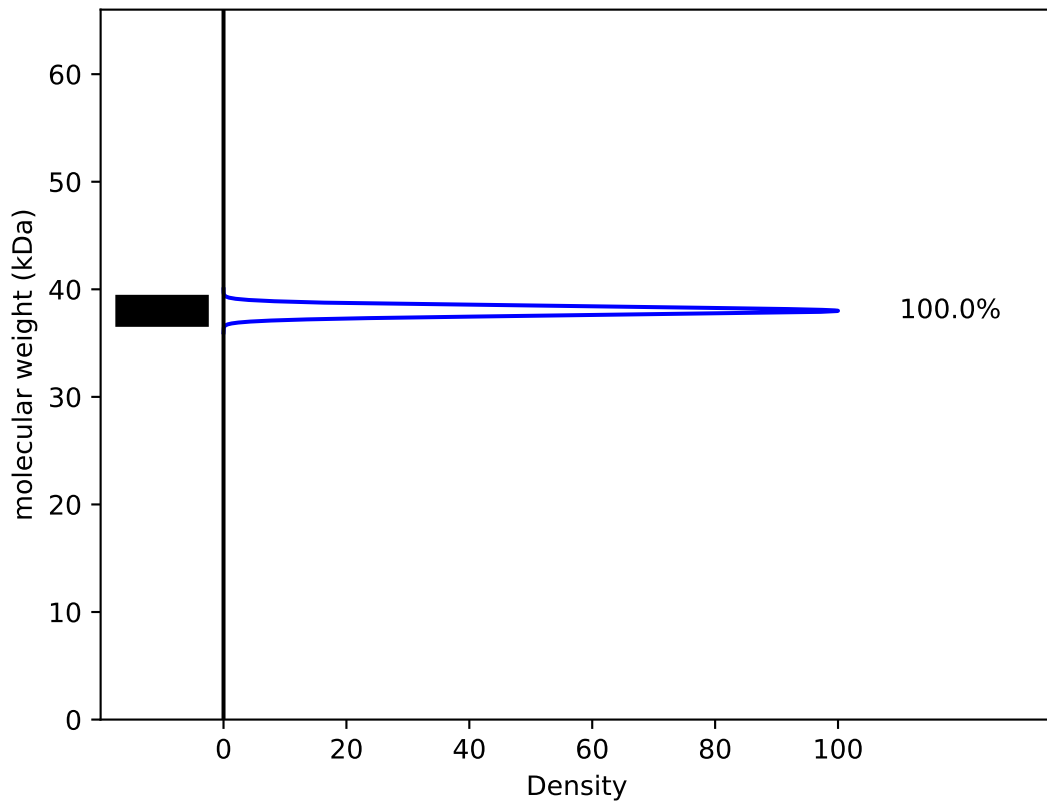

# B7ZW38



# B2RXH8



# Q86SE5





P08134

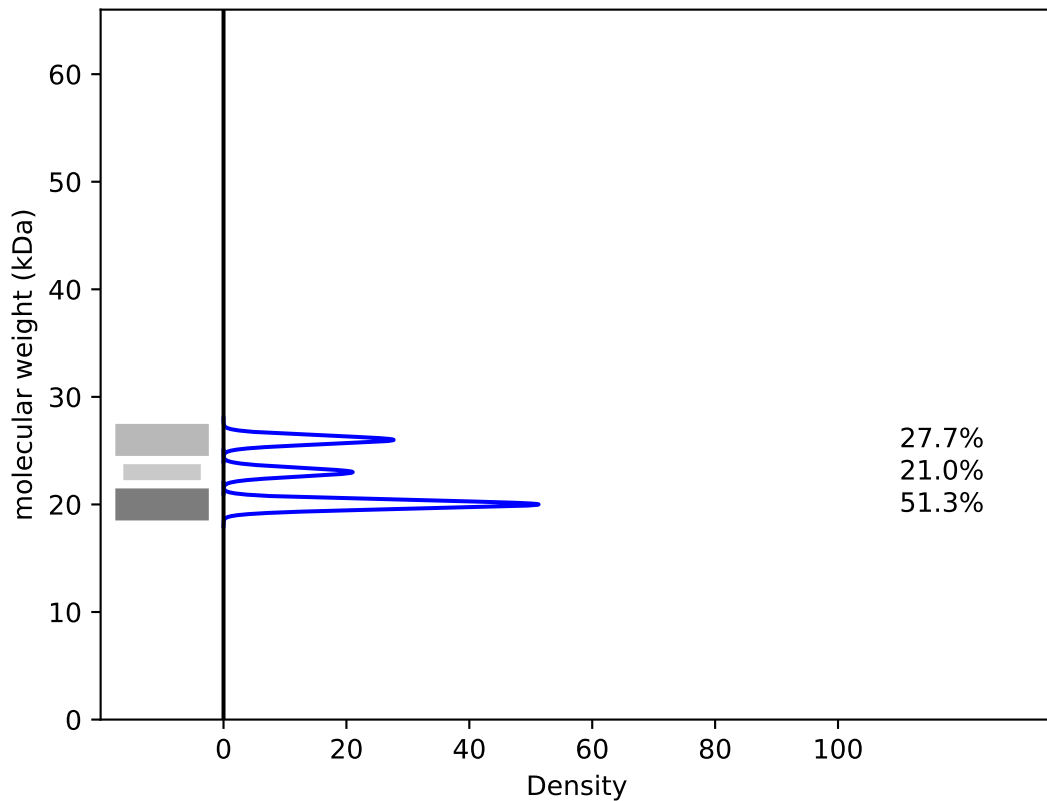

# P62745

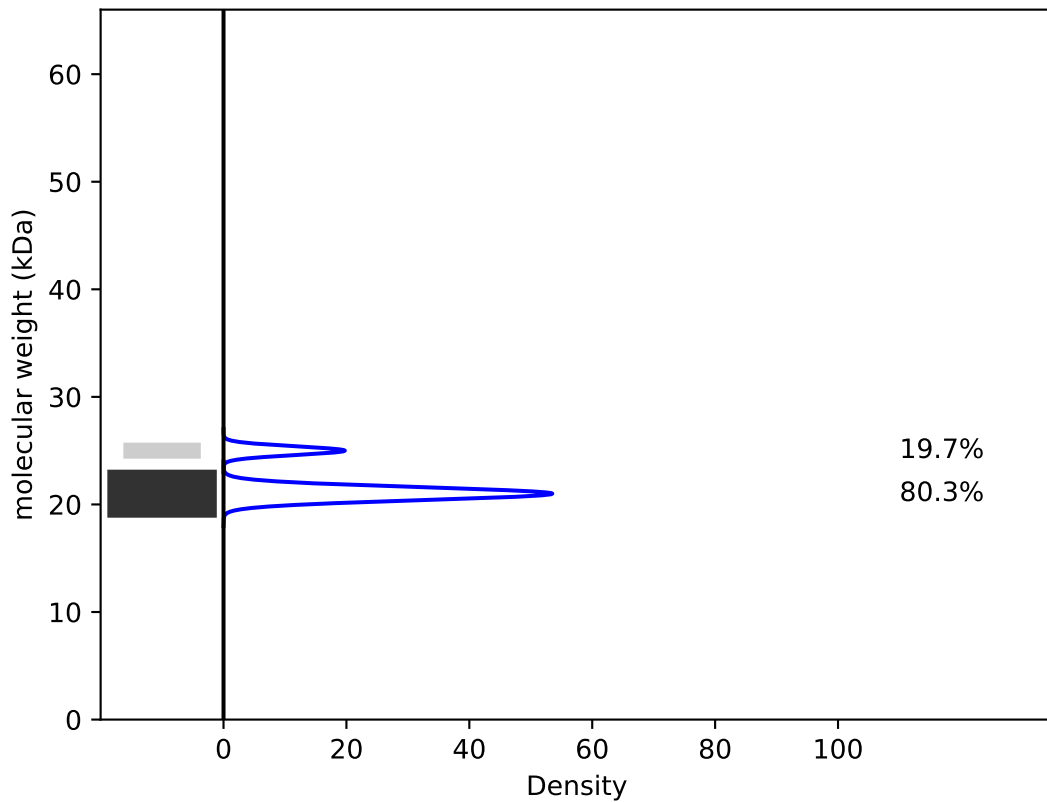

P08559

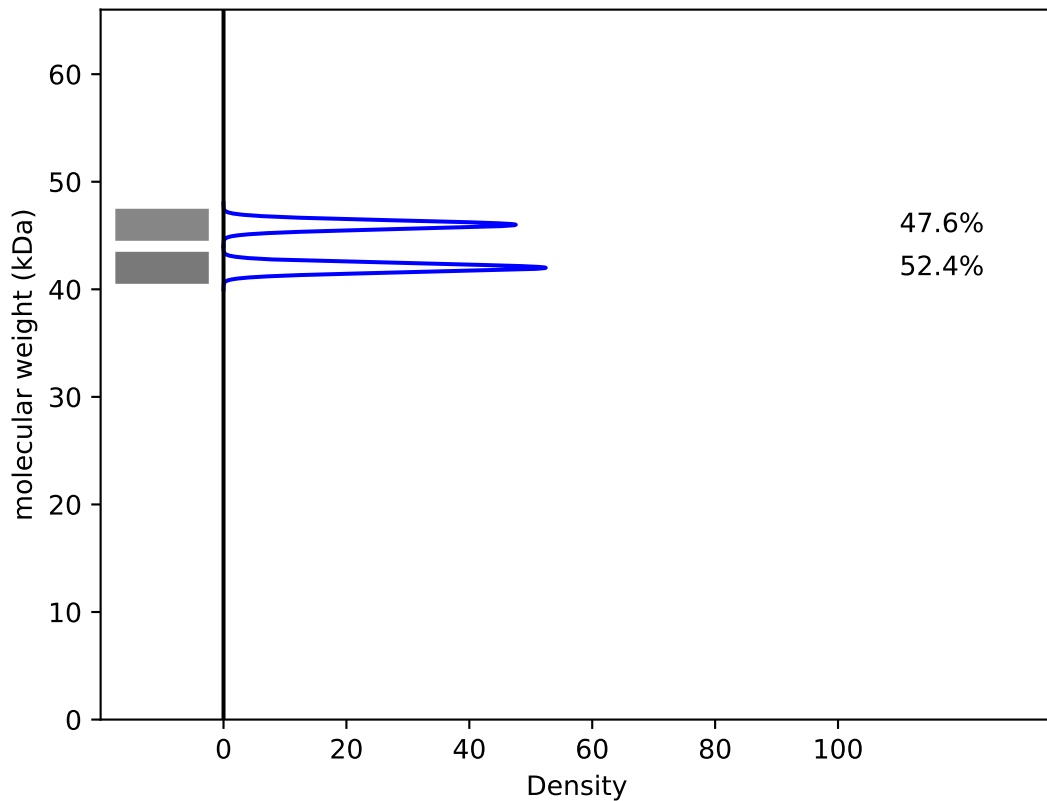

# P29803

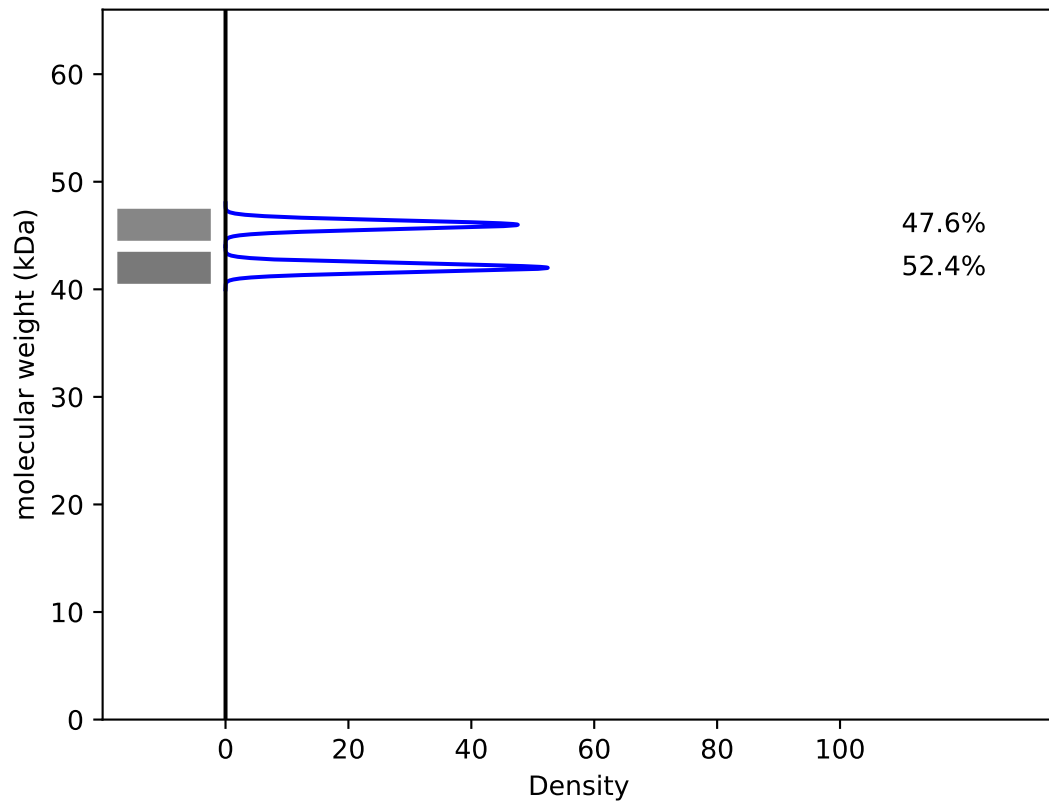

P08579

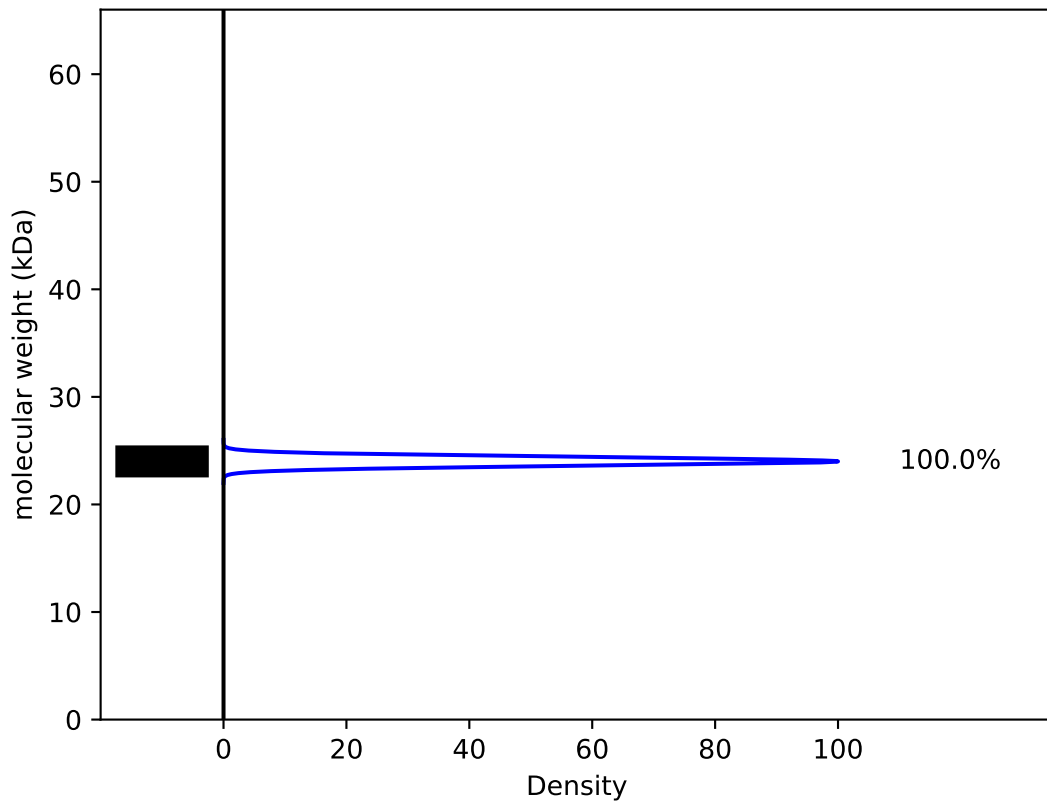

# P08670

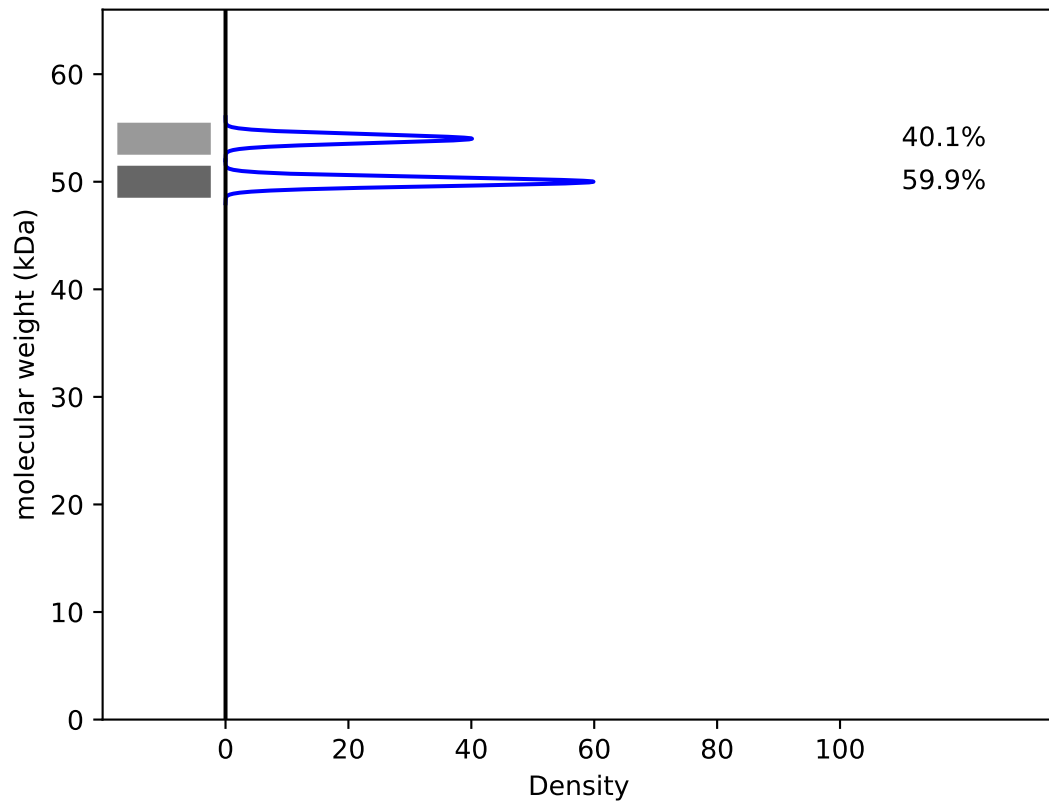

# P41219

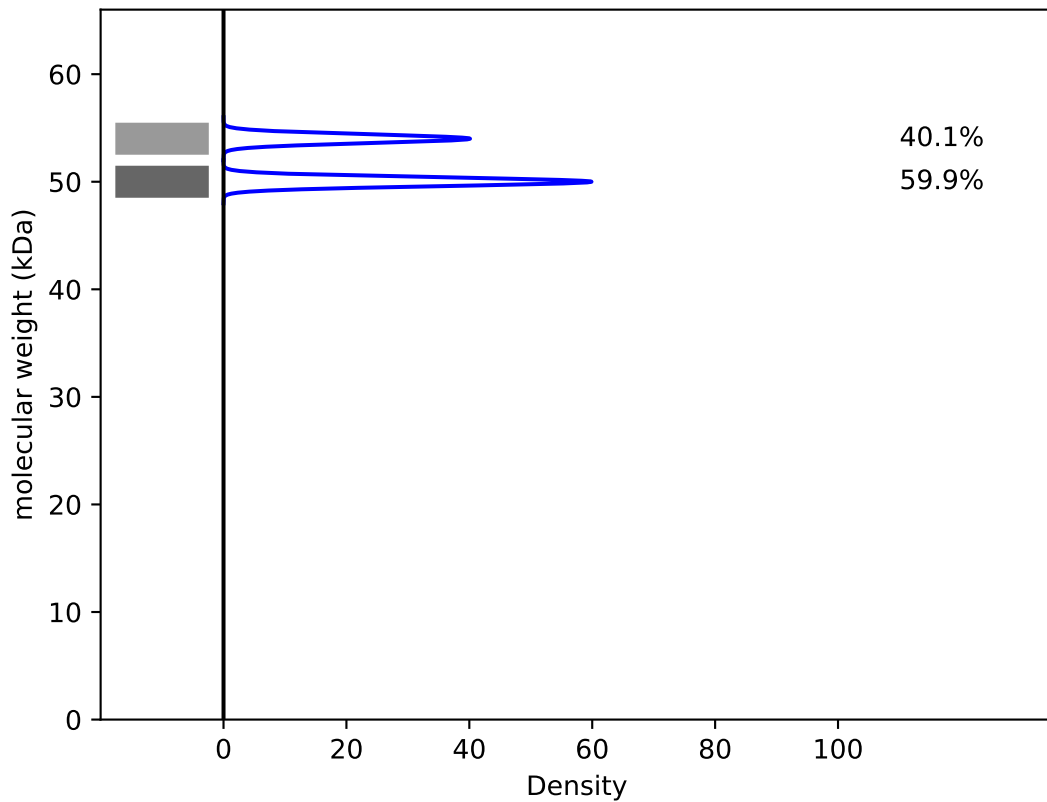

# P14136





P08708

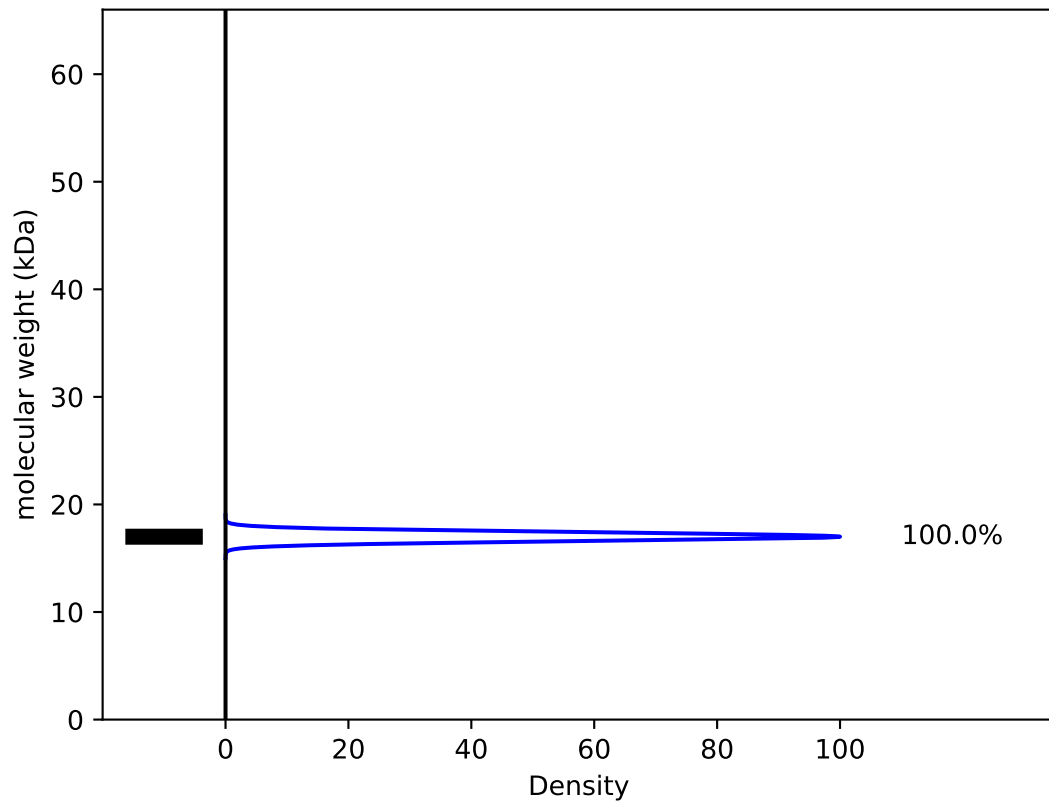

P08754

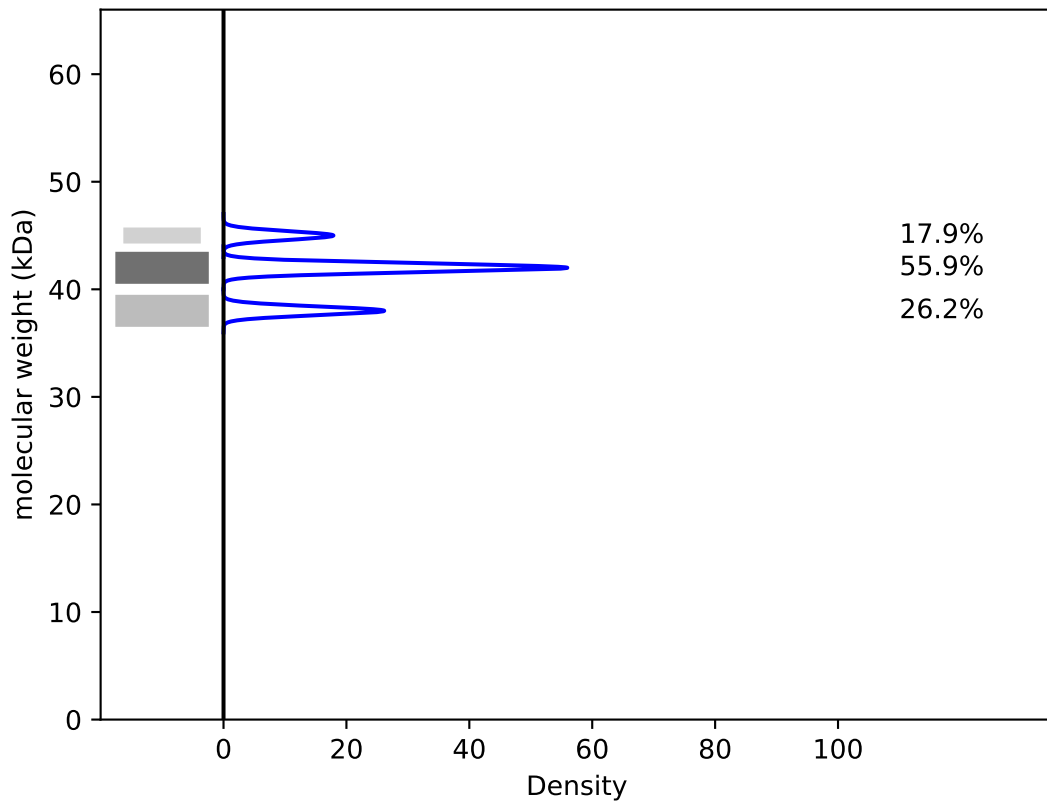

P08758



P09001



P09012



P09104

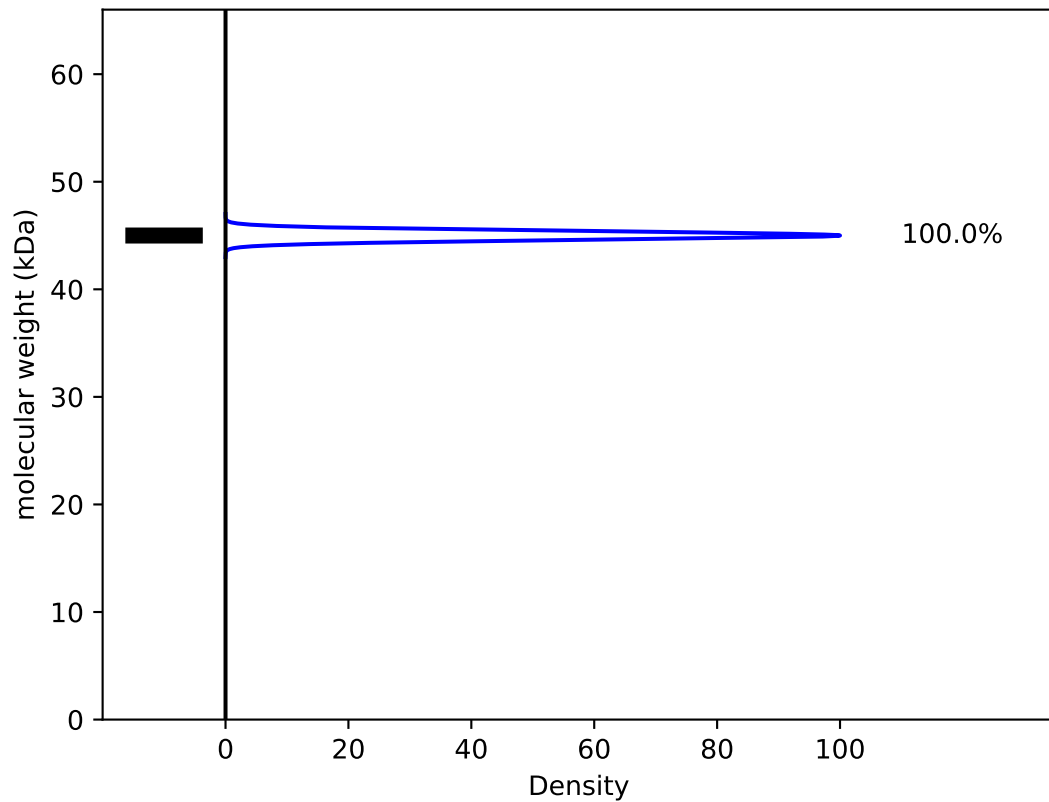

# P09110

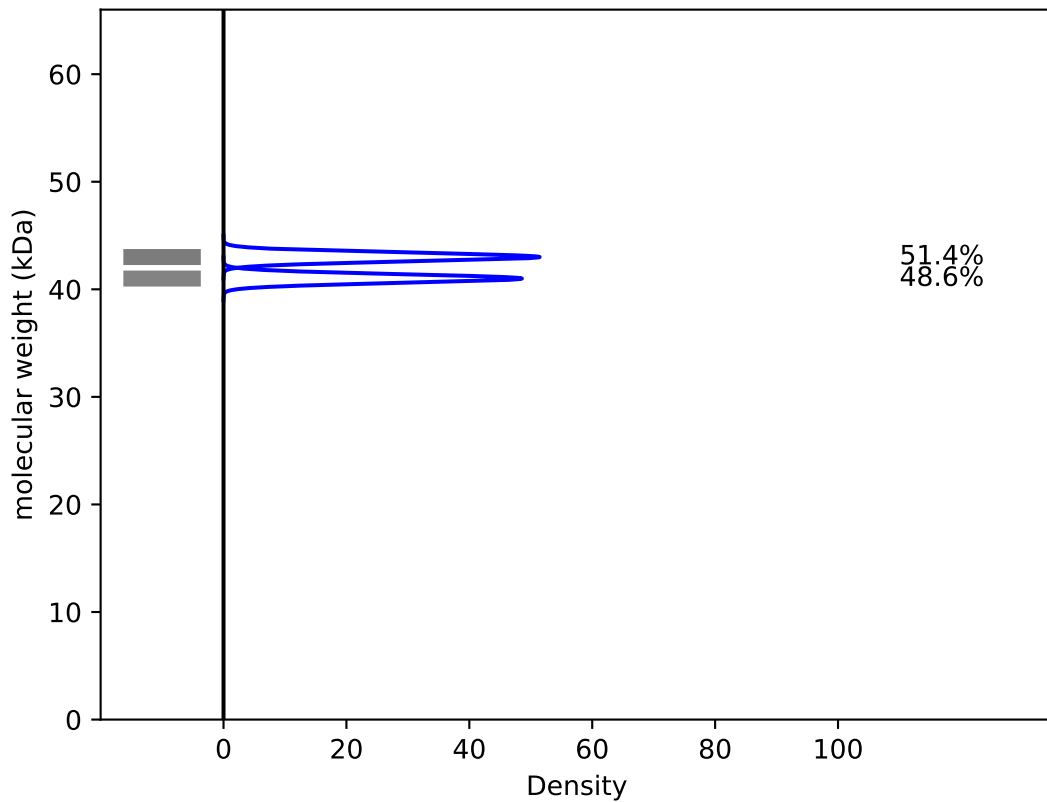

P09211

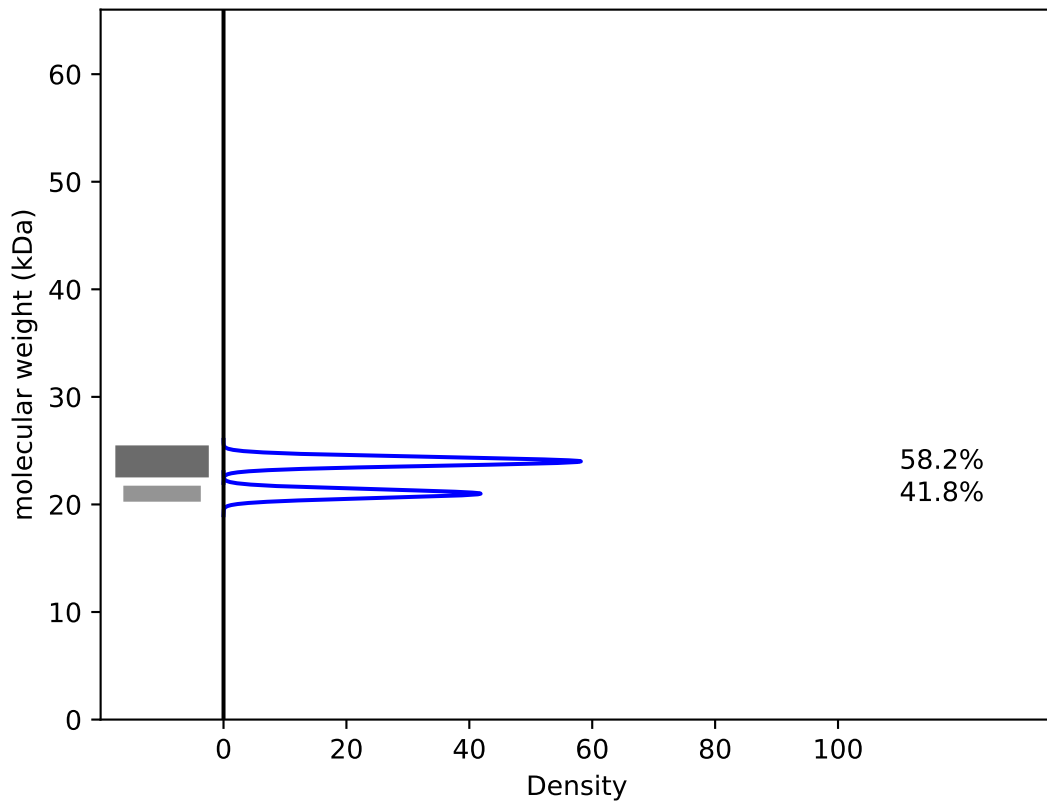



P09382

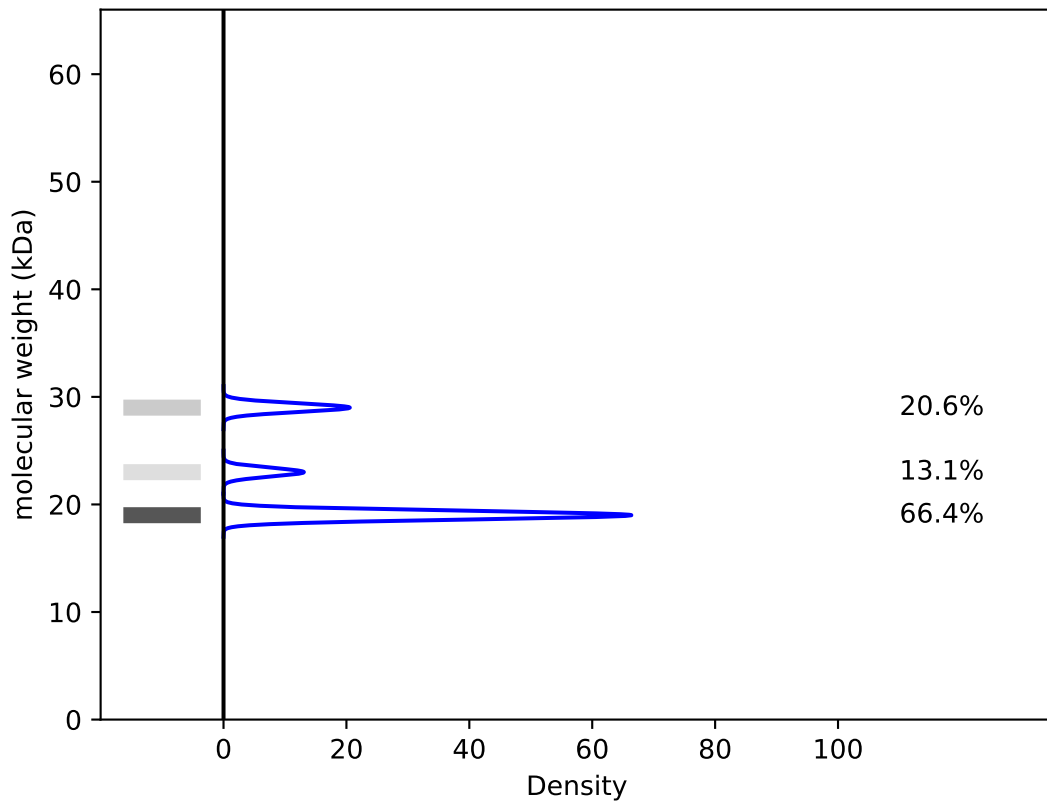

P09417



P09429

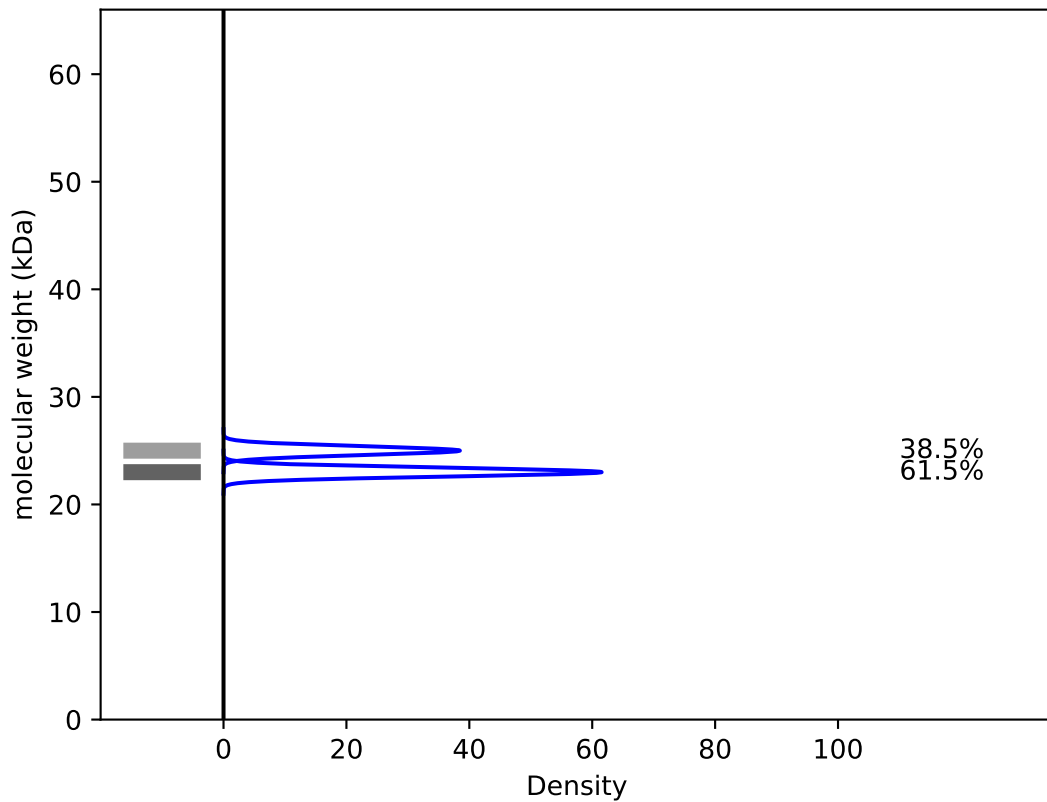

# B2RPK0



P09488

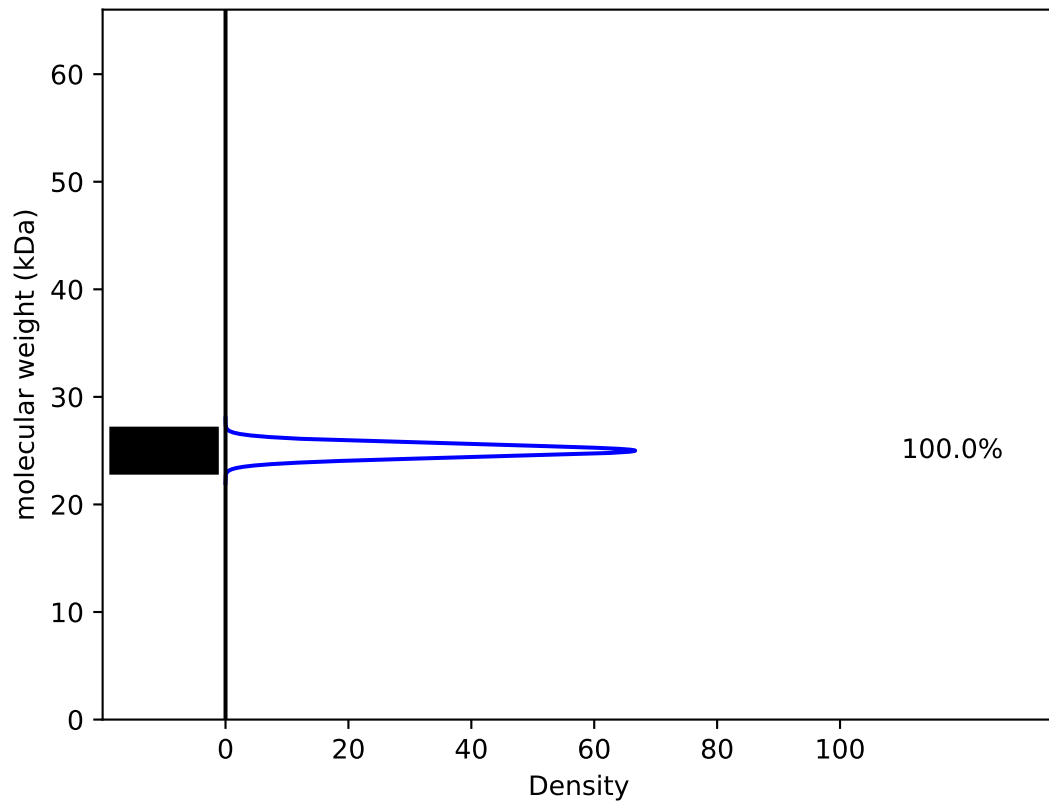

Q03013

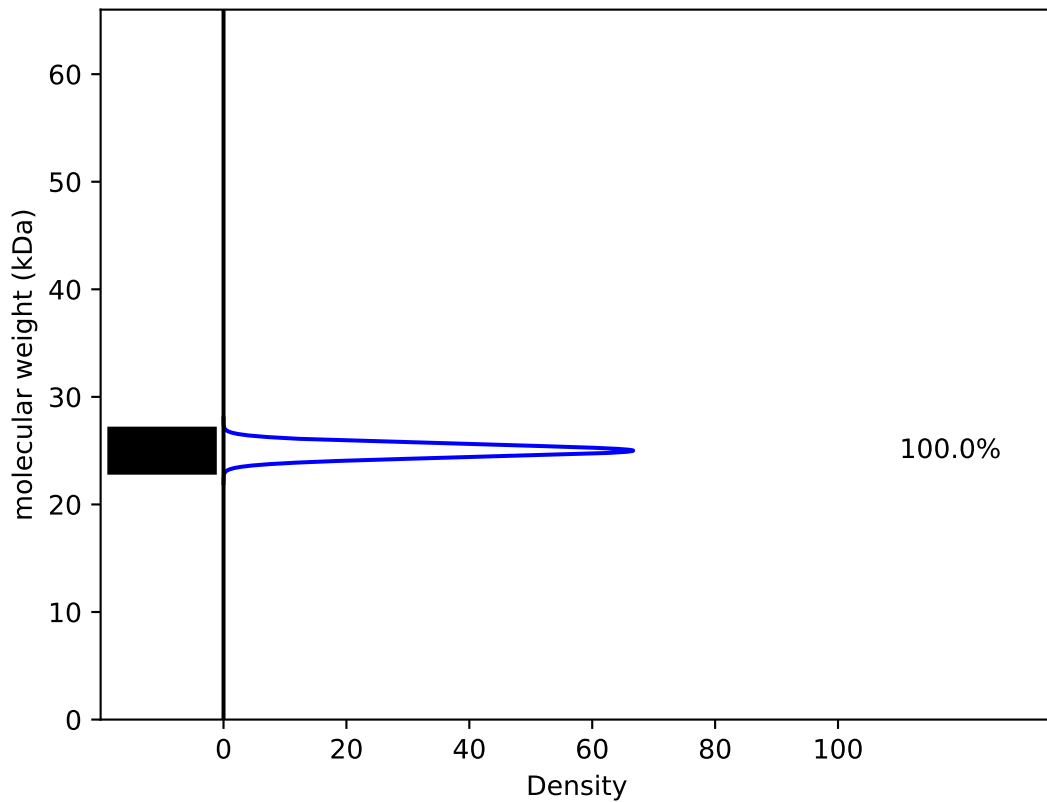

P09622



# Q32P51





P09661



P09972

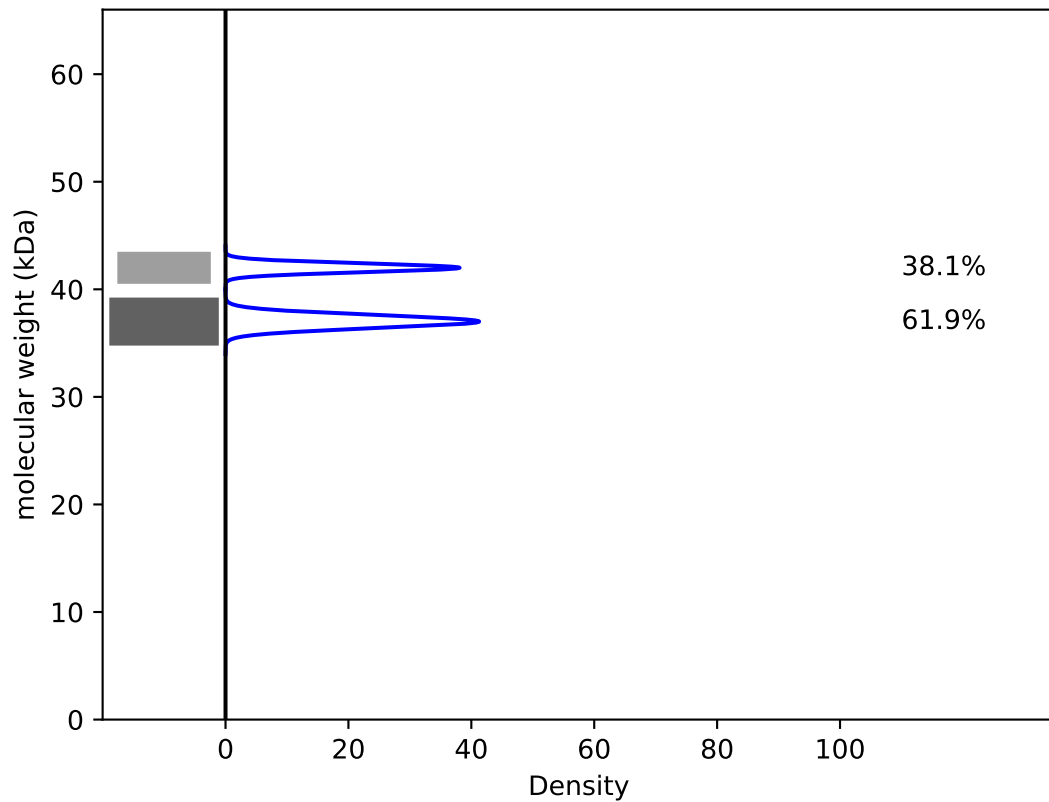

# P62979

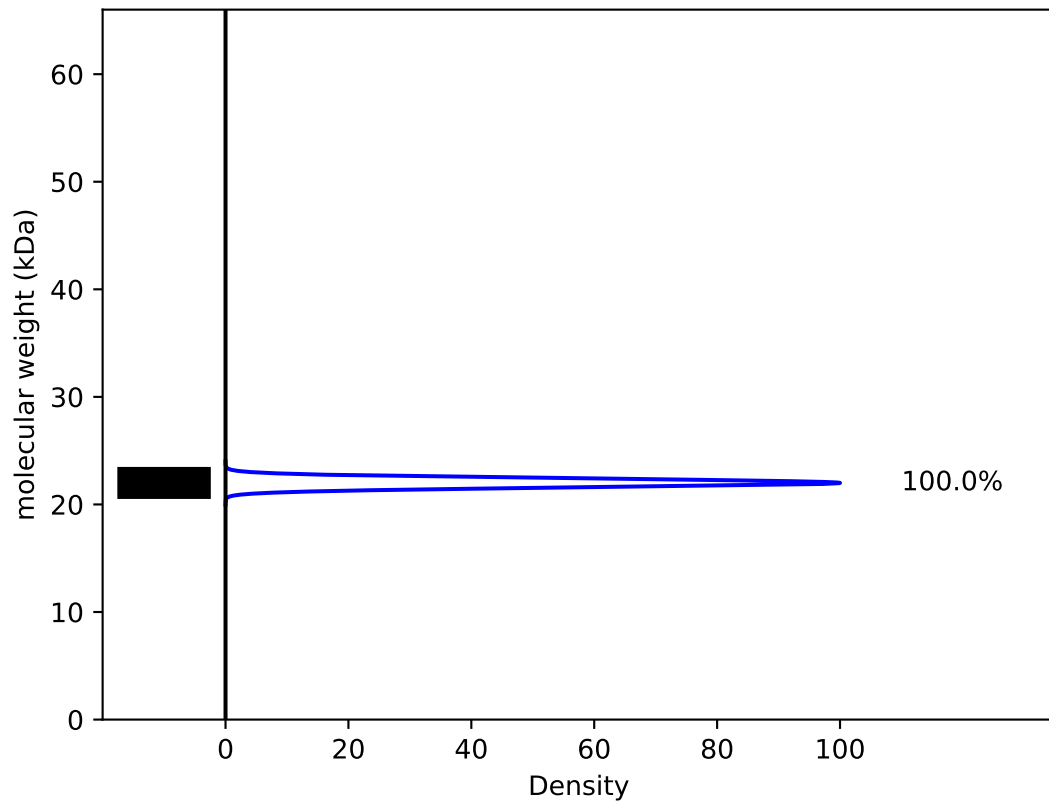

# POCG47



# Q01081

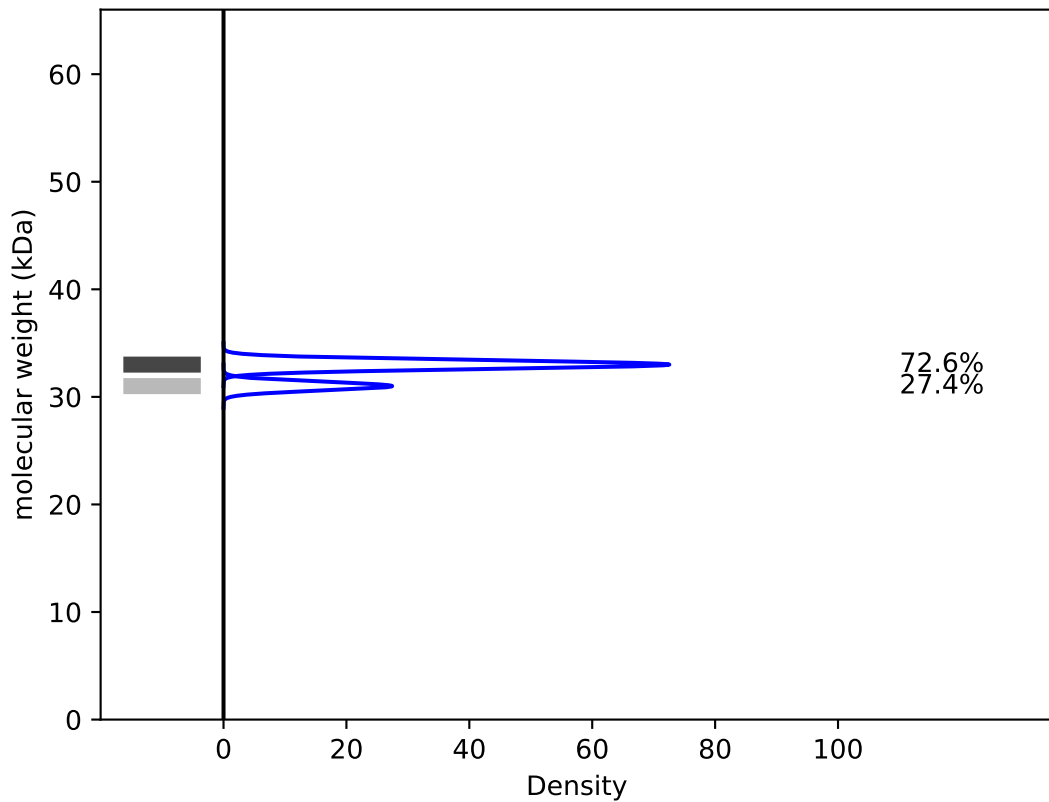

# PODN76



# P10301

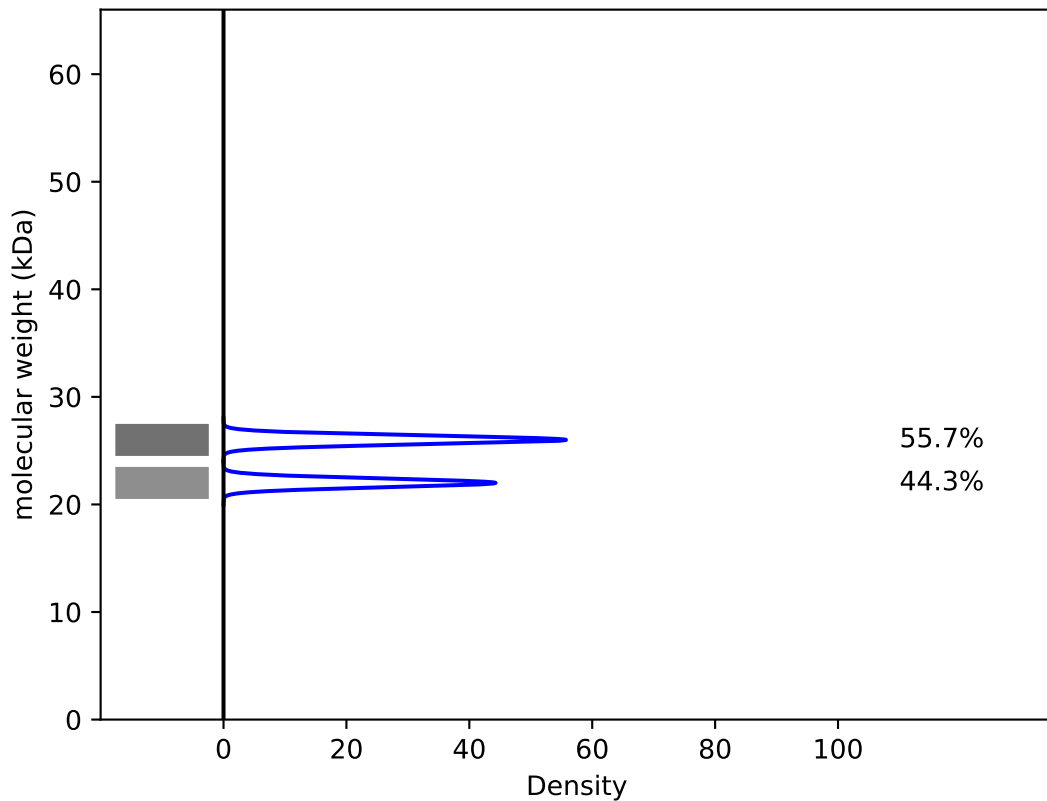

# P62070

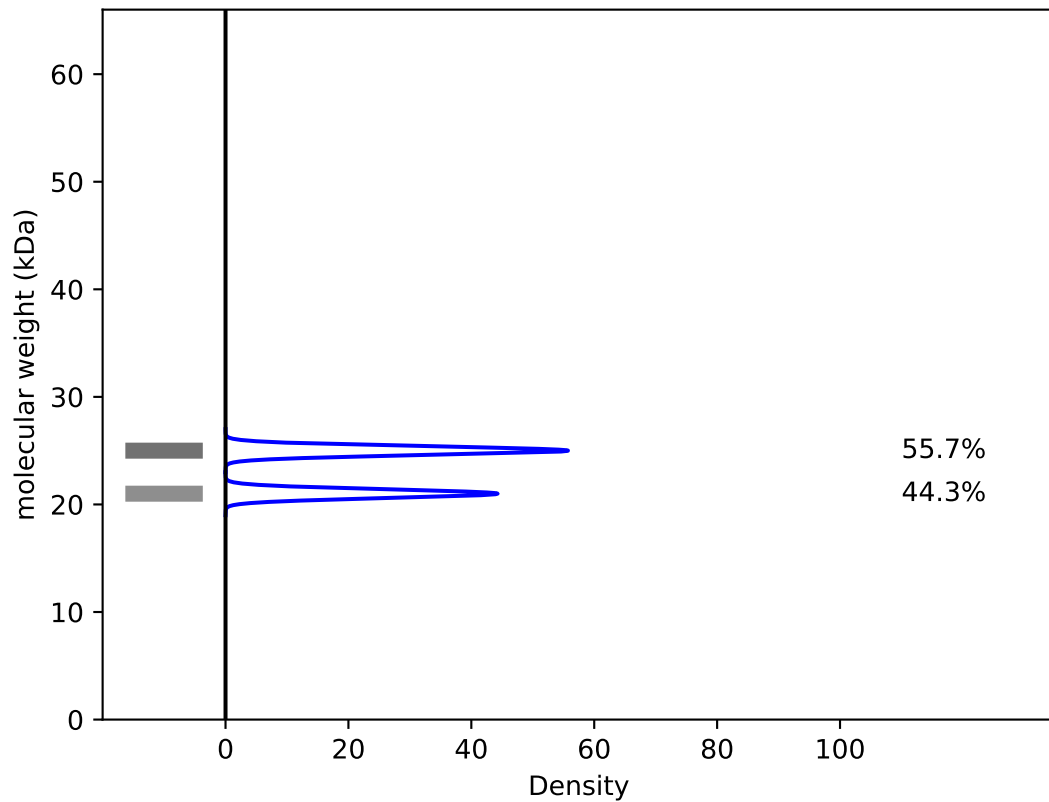



# P10316

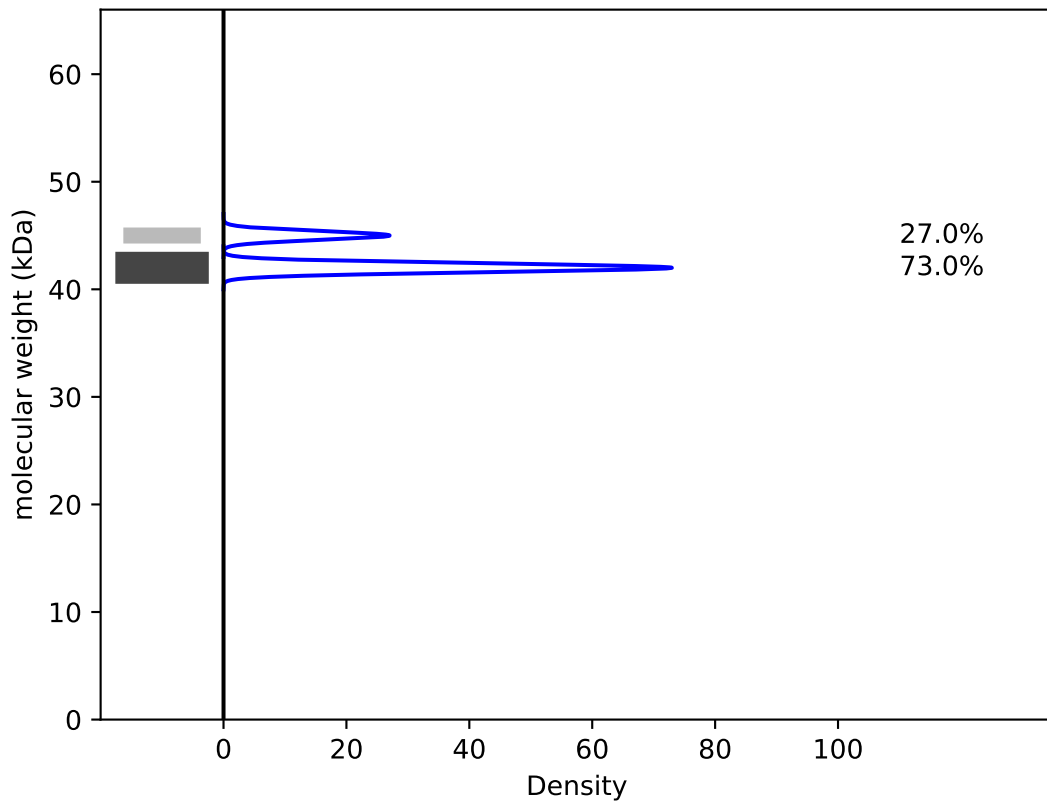

# P01892



# P10620

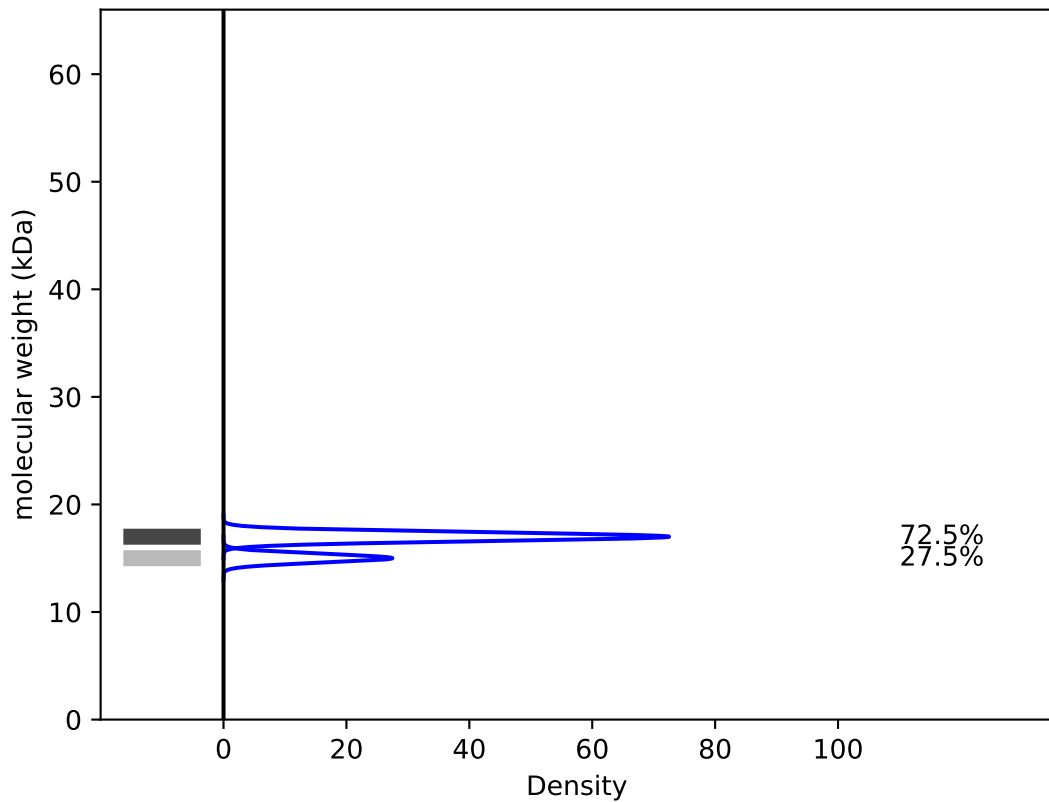

# P10644



# P10768

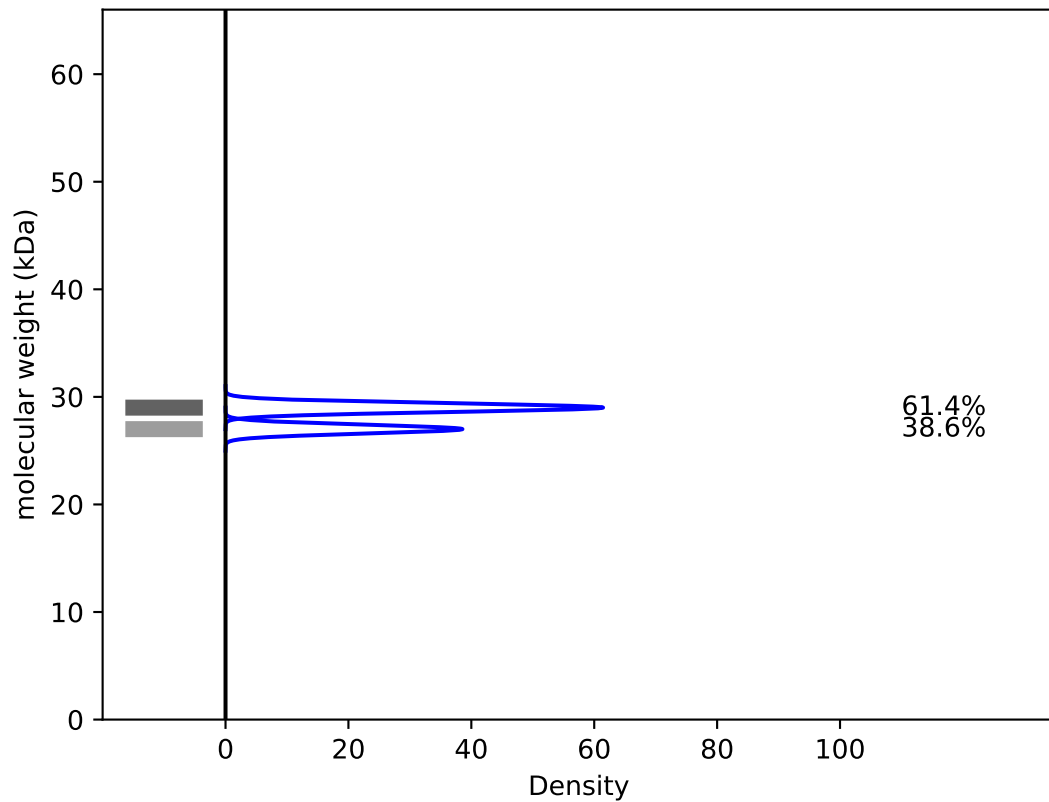

# P10809

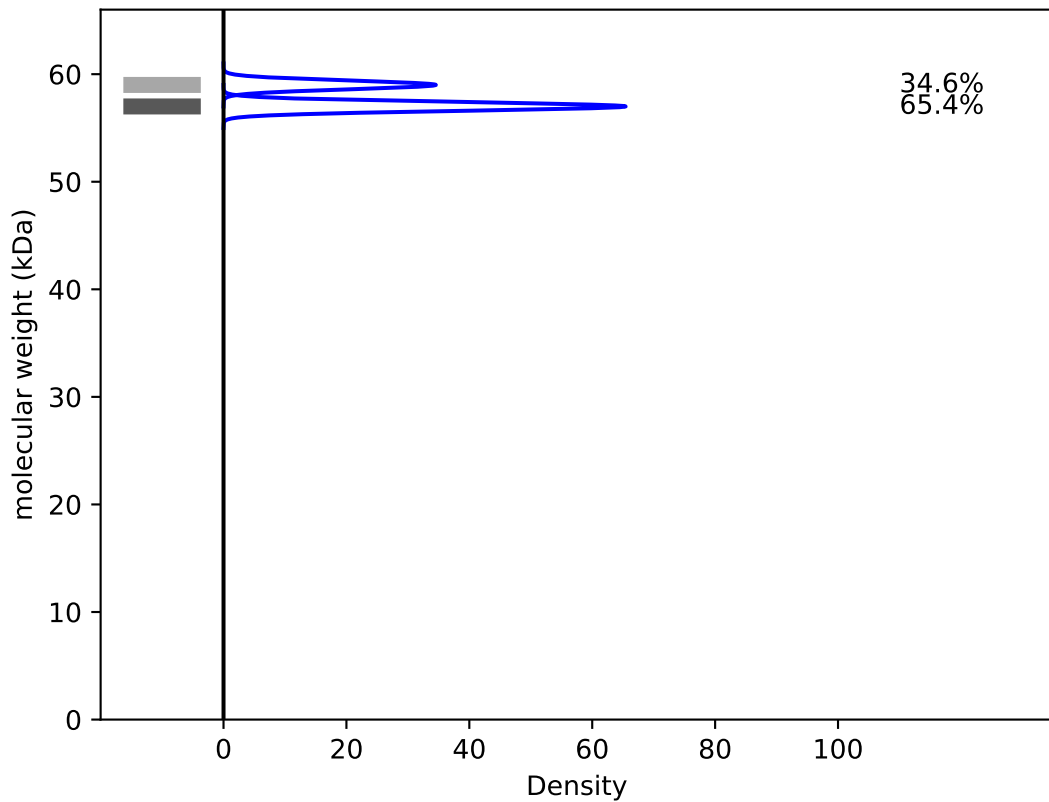

# P11117

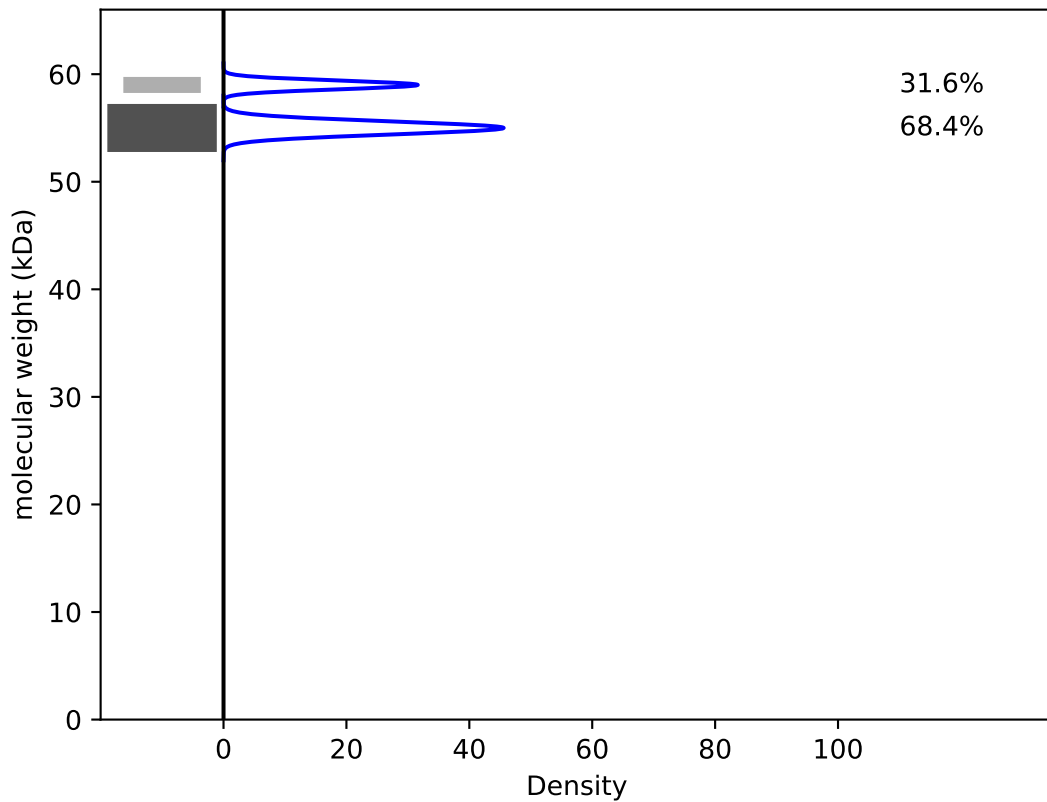

# P11172





# P11177



# P11233

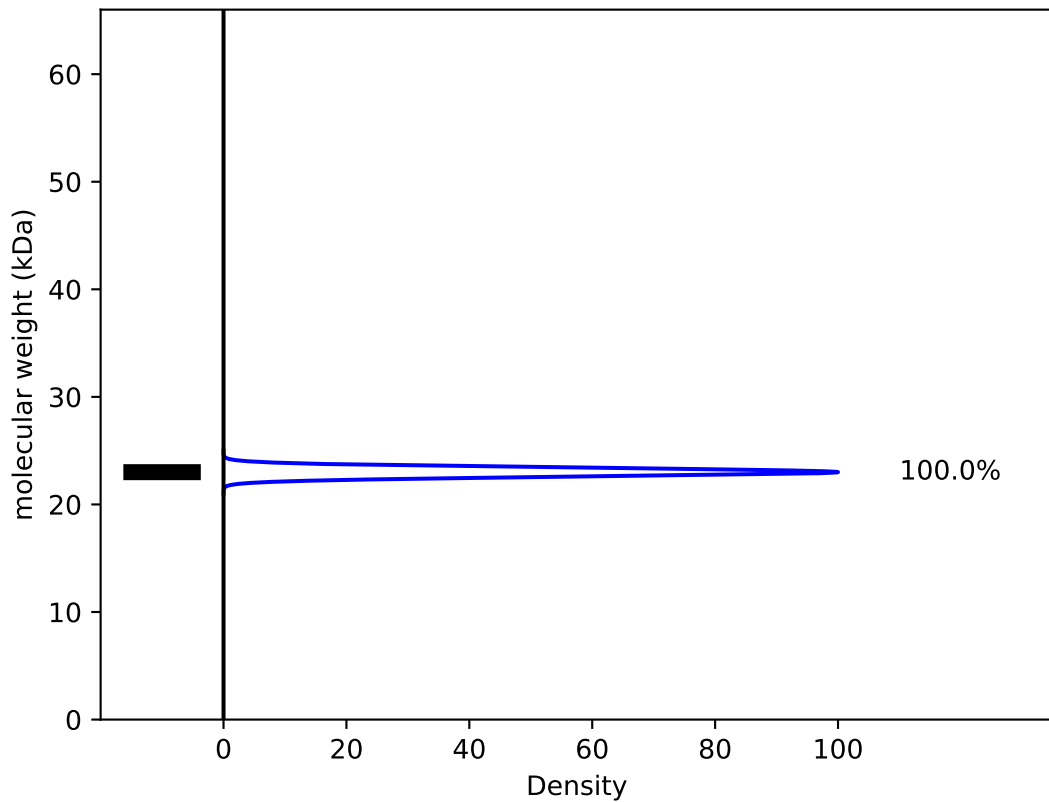

# P11279



# P11310

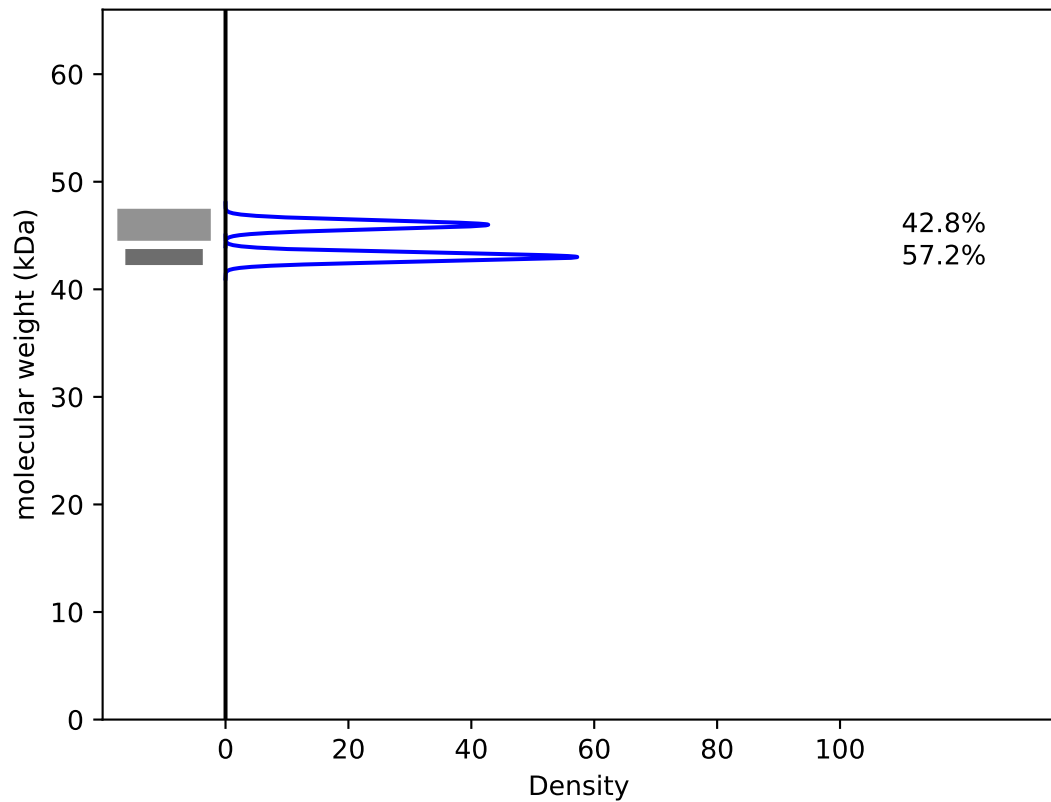

# P11413

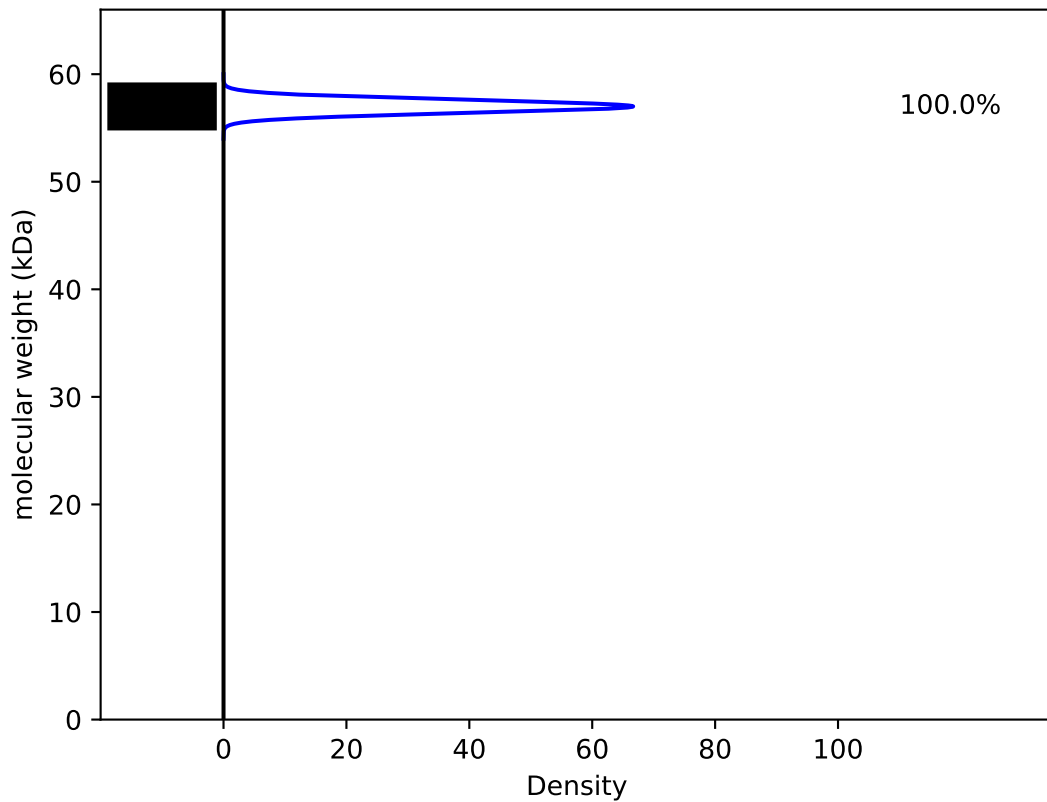

# P11766



# P11802

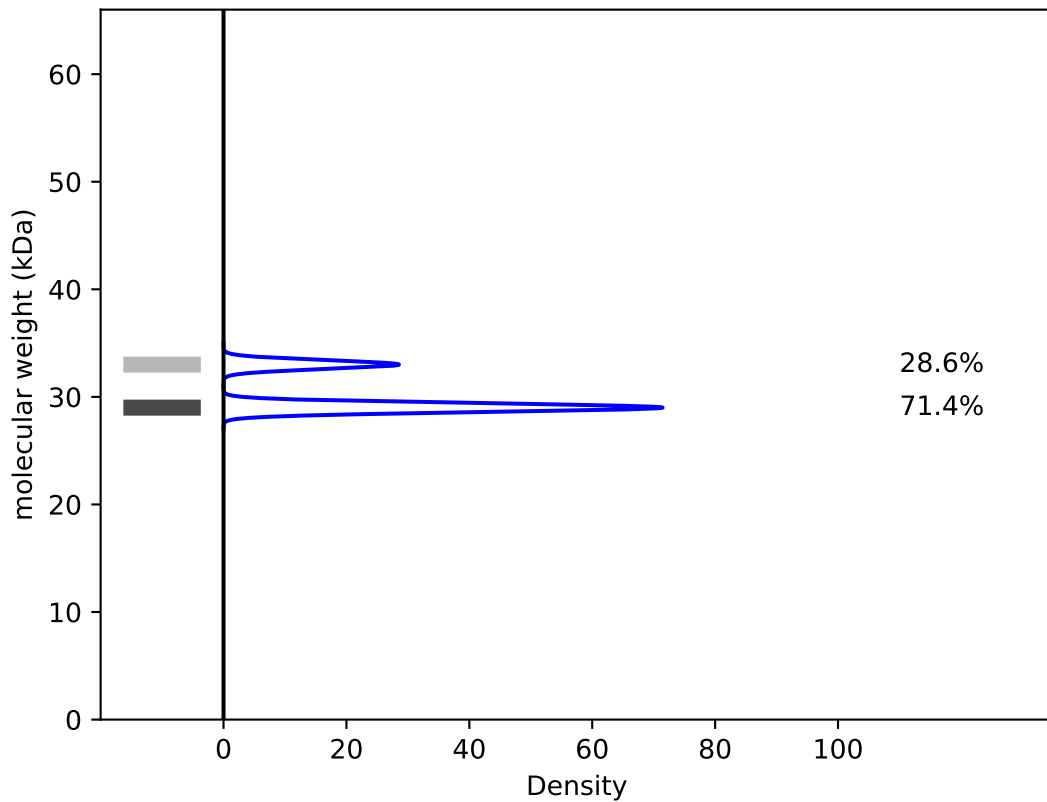

# P11908

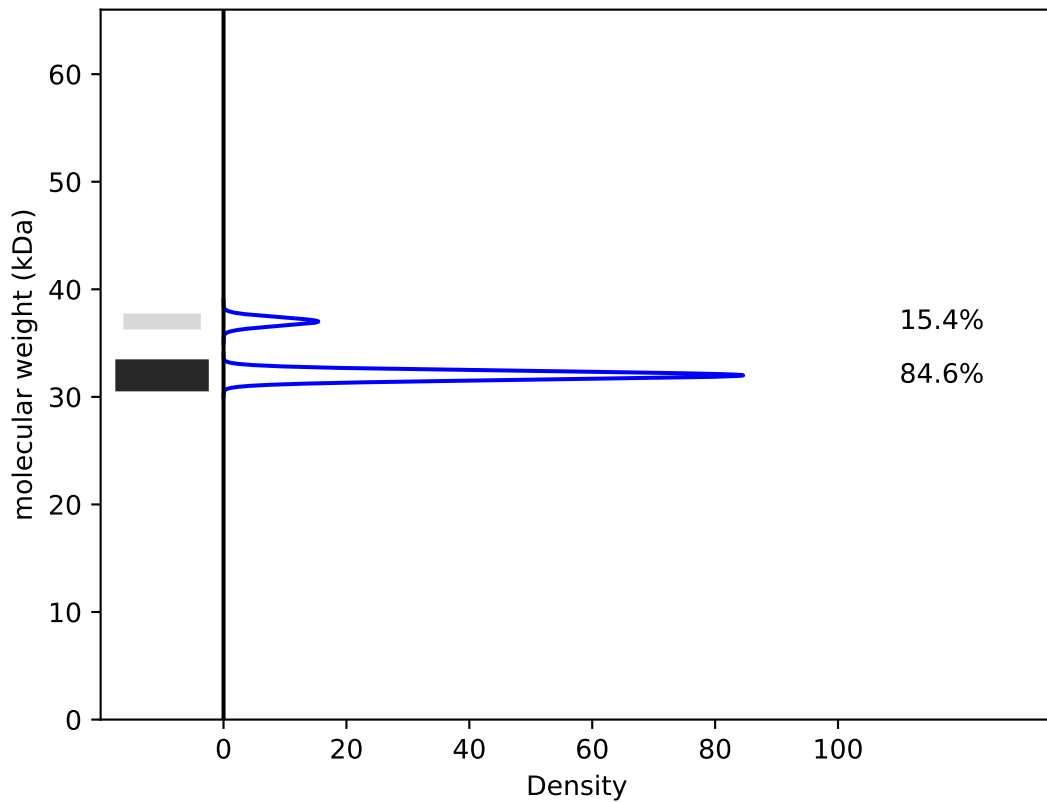



# P12004

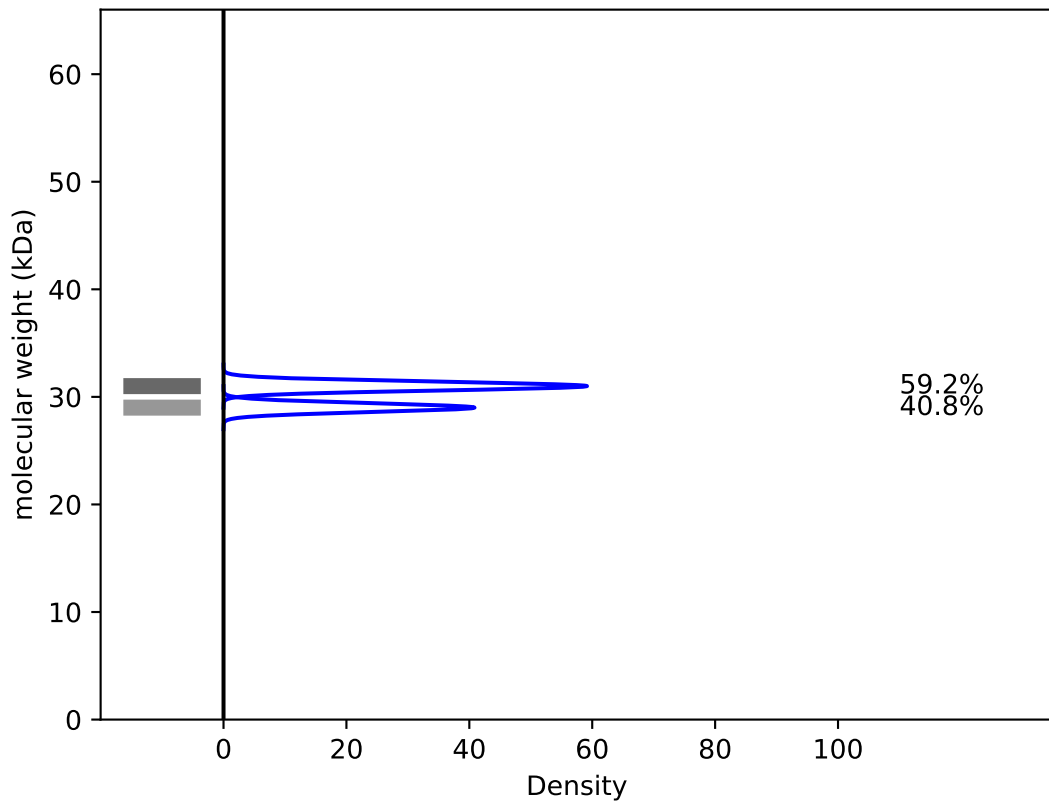

P12081

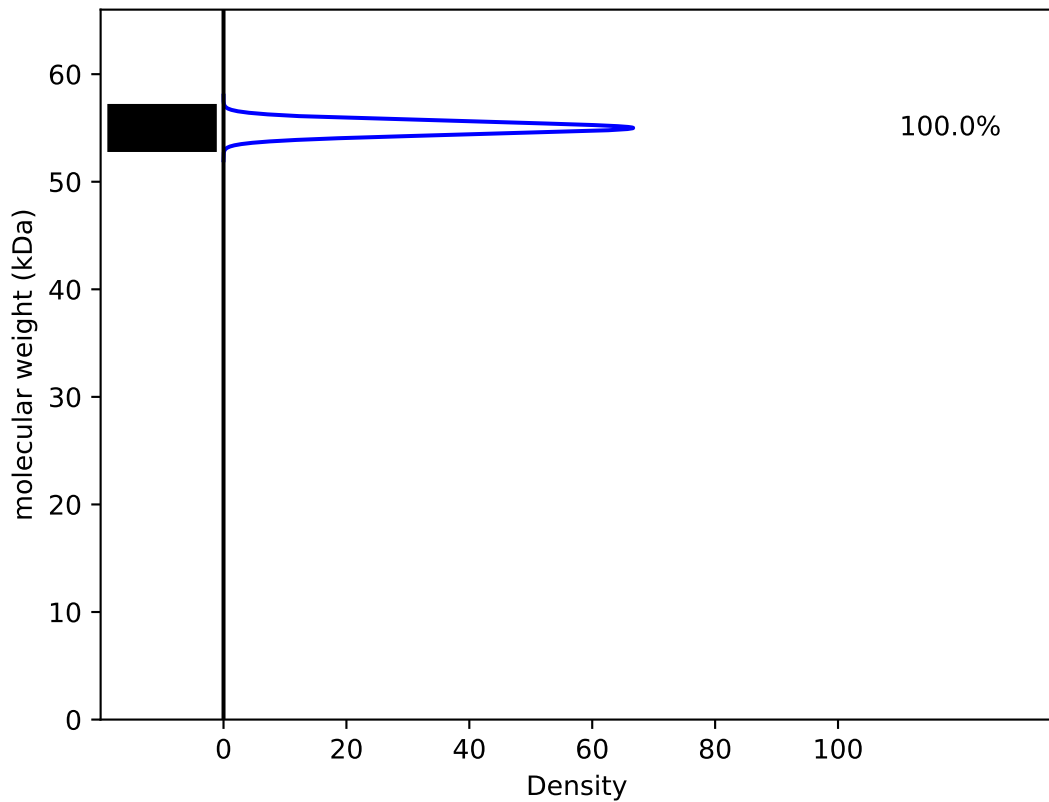

# P12236

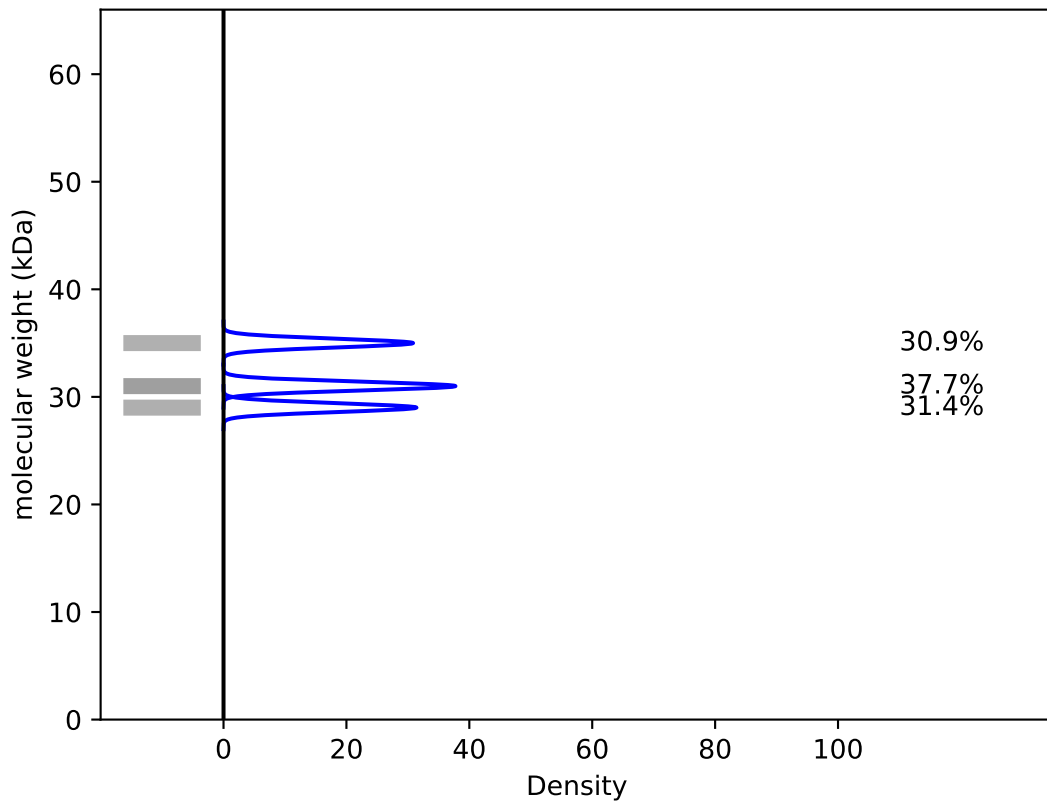

# P12235

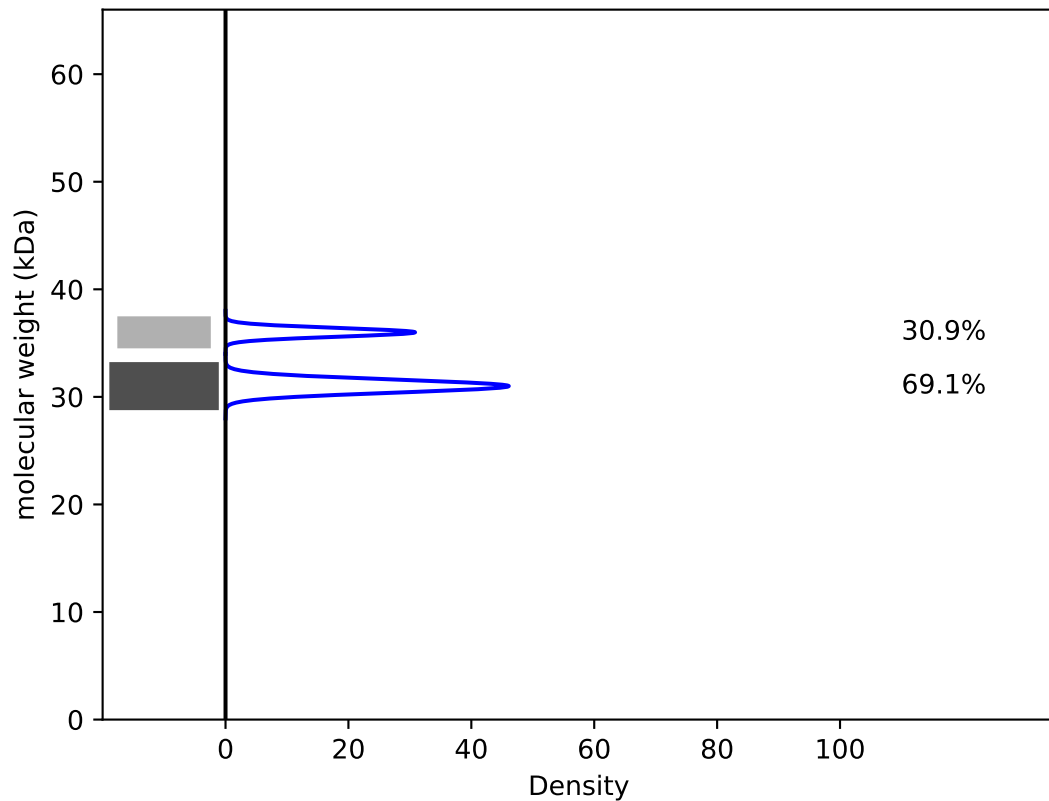

# P12268

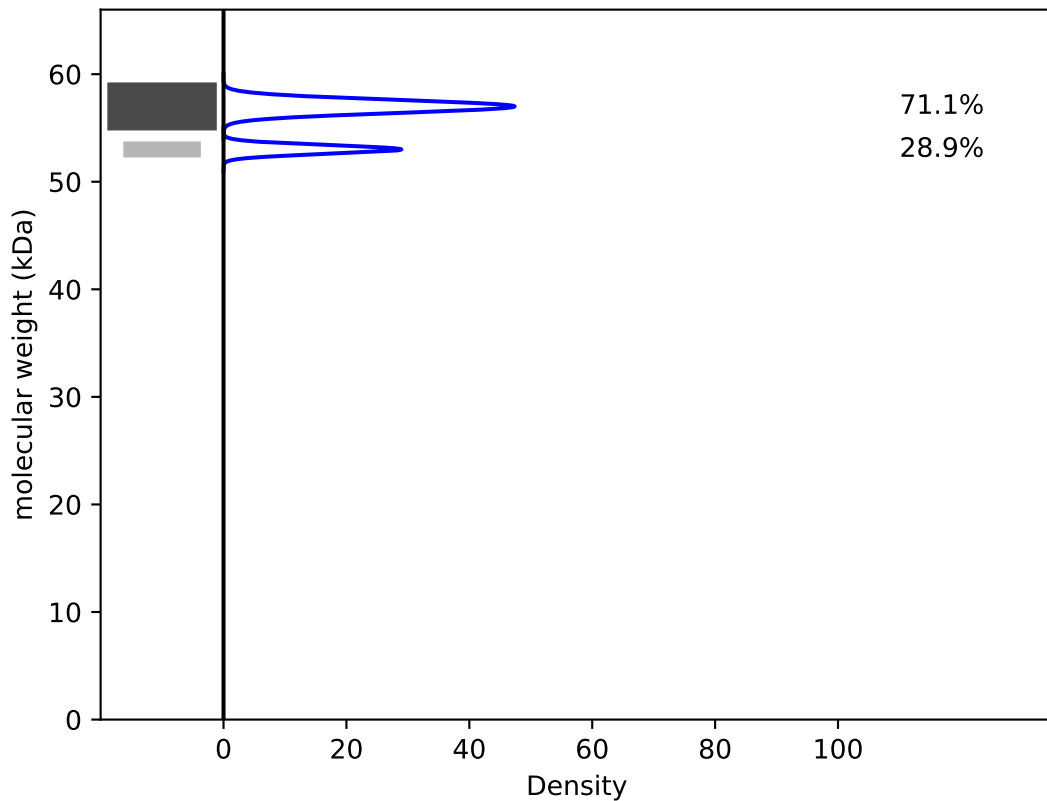

P12277



P06732



# P12532

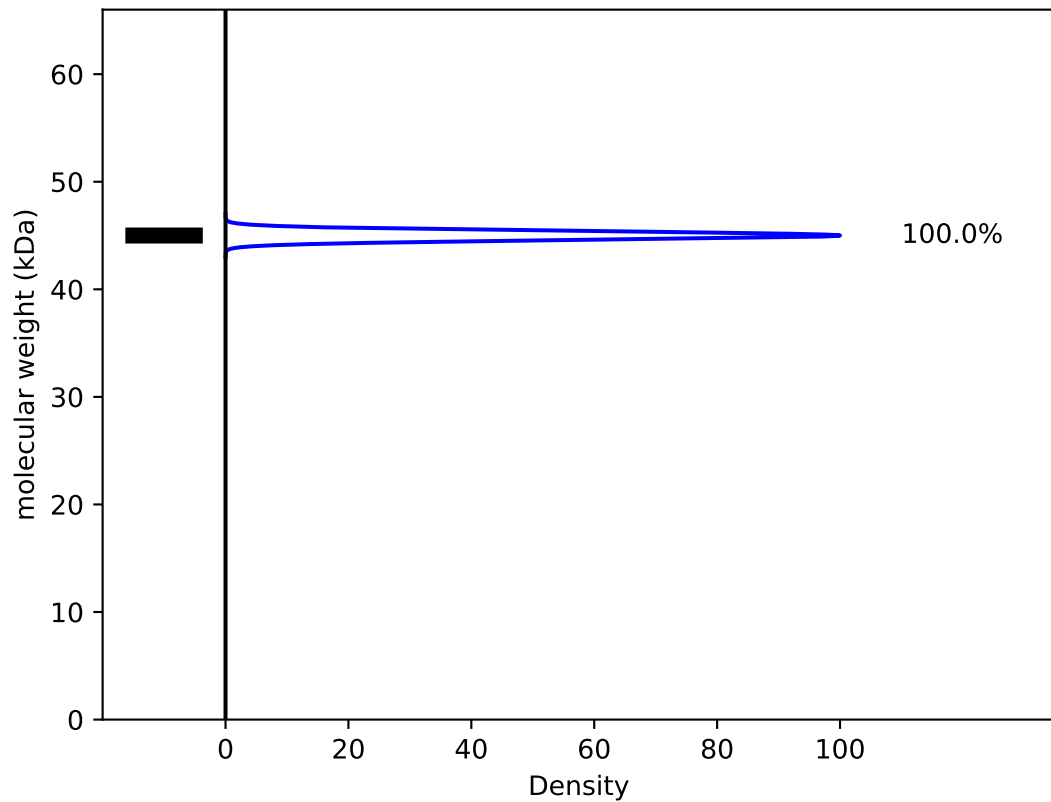



# P17540



P12955



# P13489



# P13674

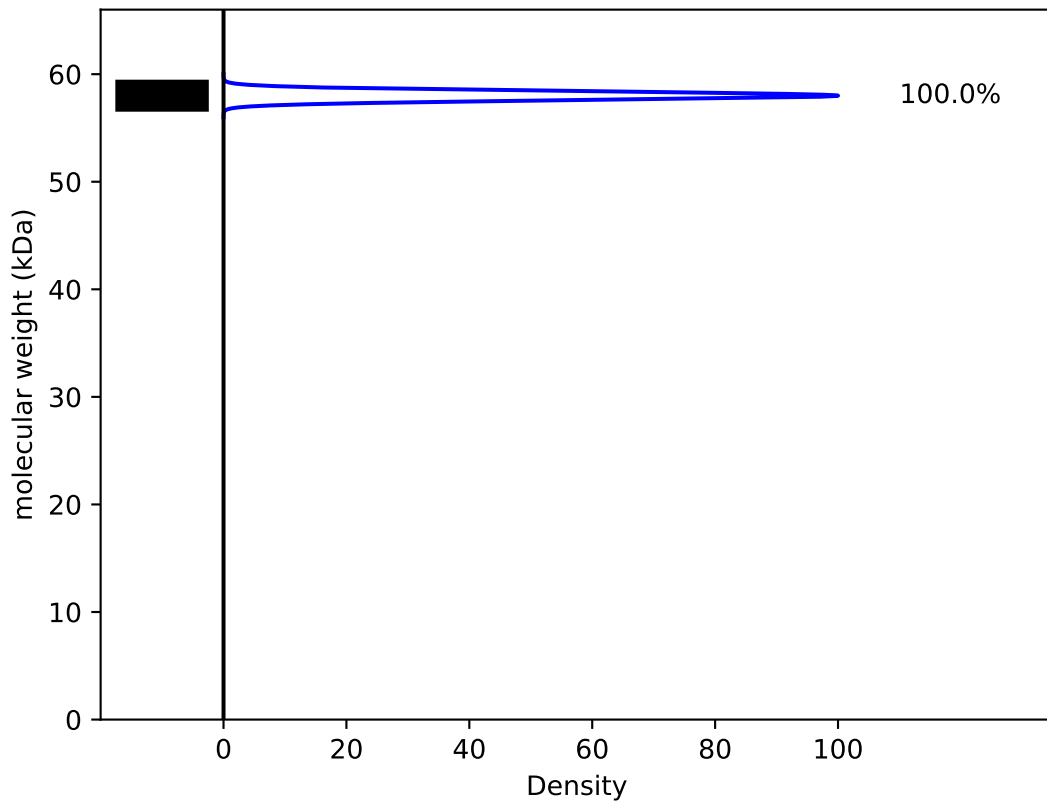

# P13693

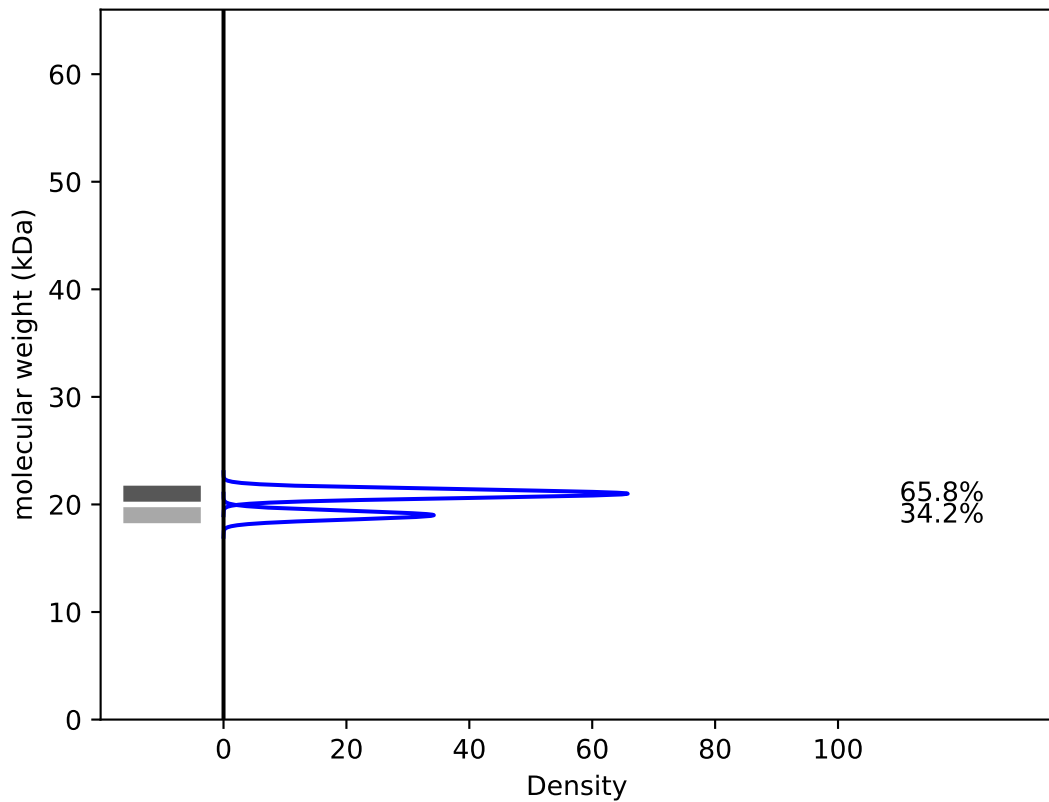

# Q56UQ5



# P13804



# P13861

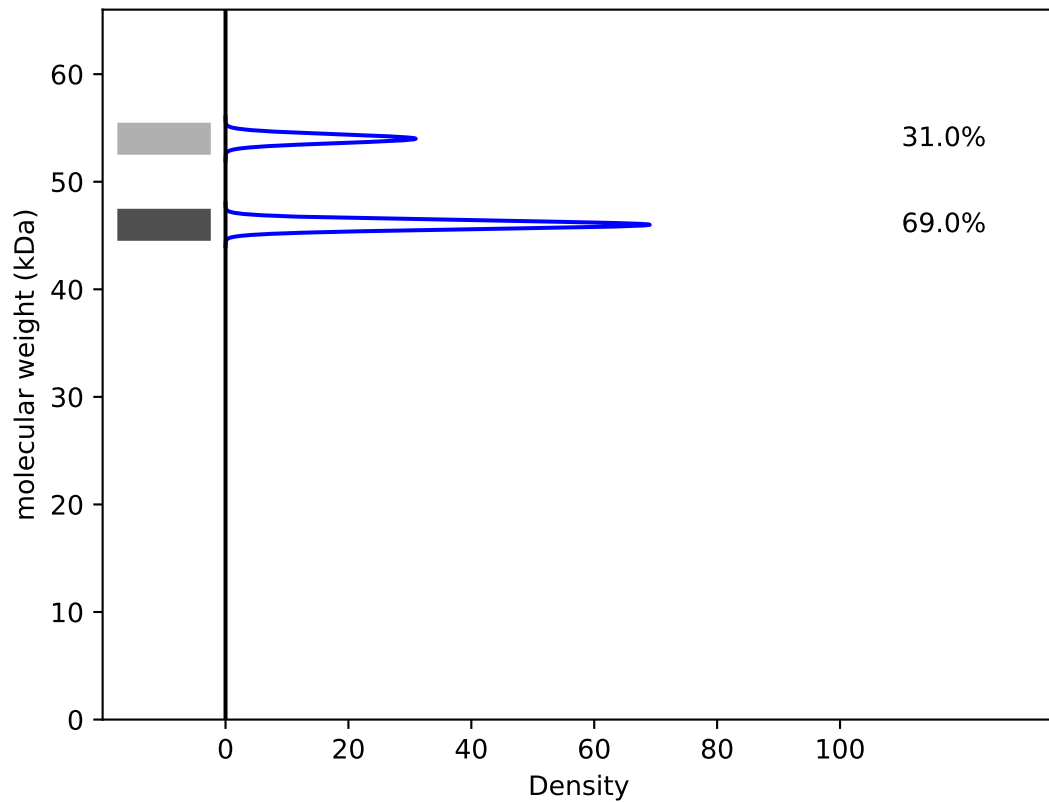



# P31323

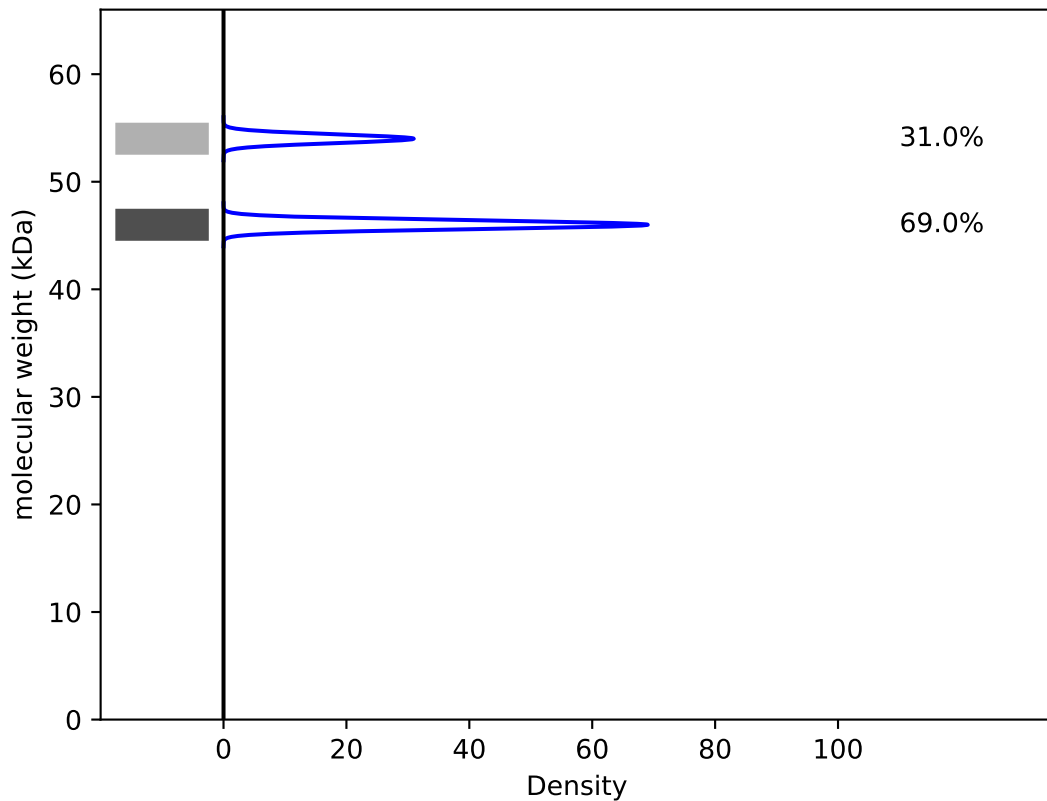

# P13984



# P13995

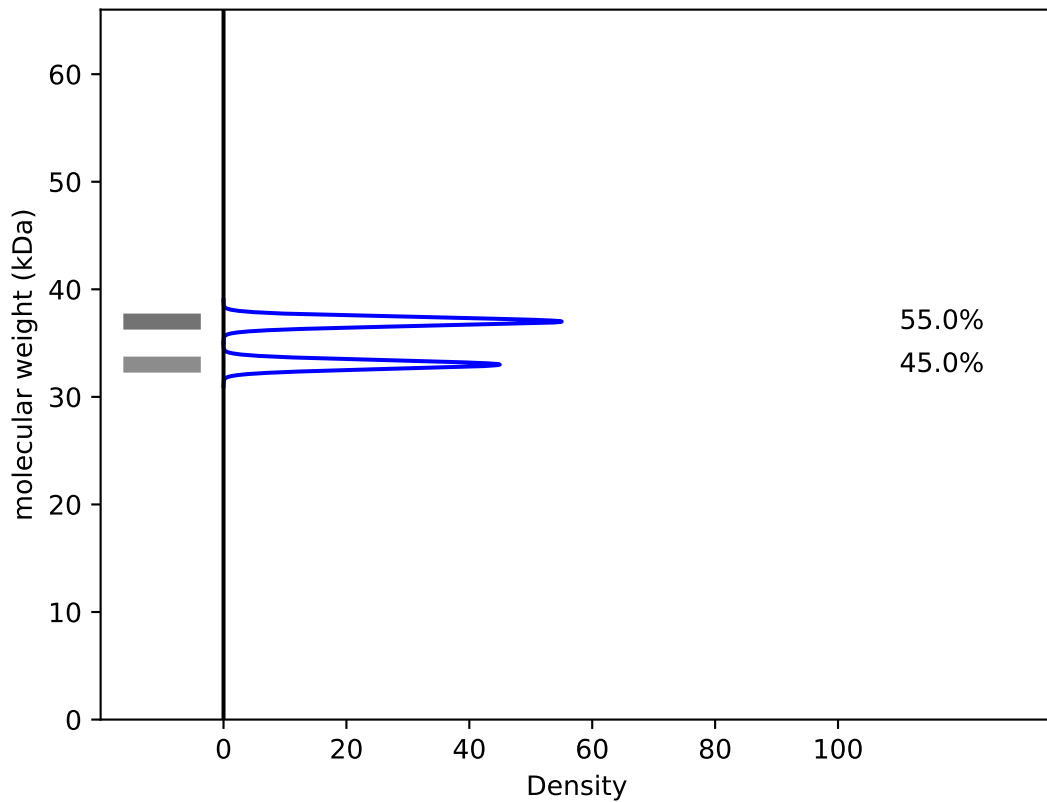

# P14550

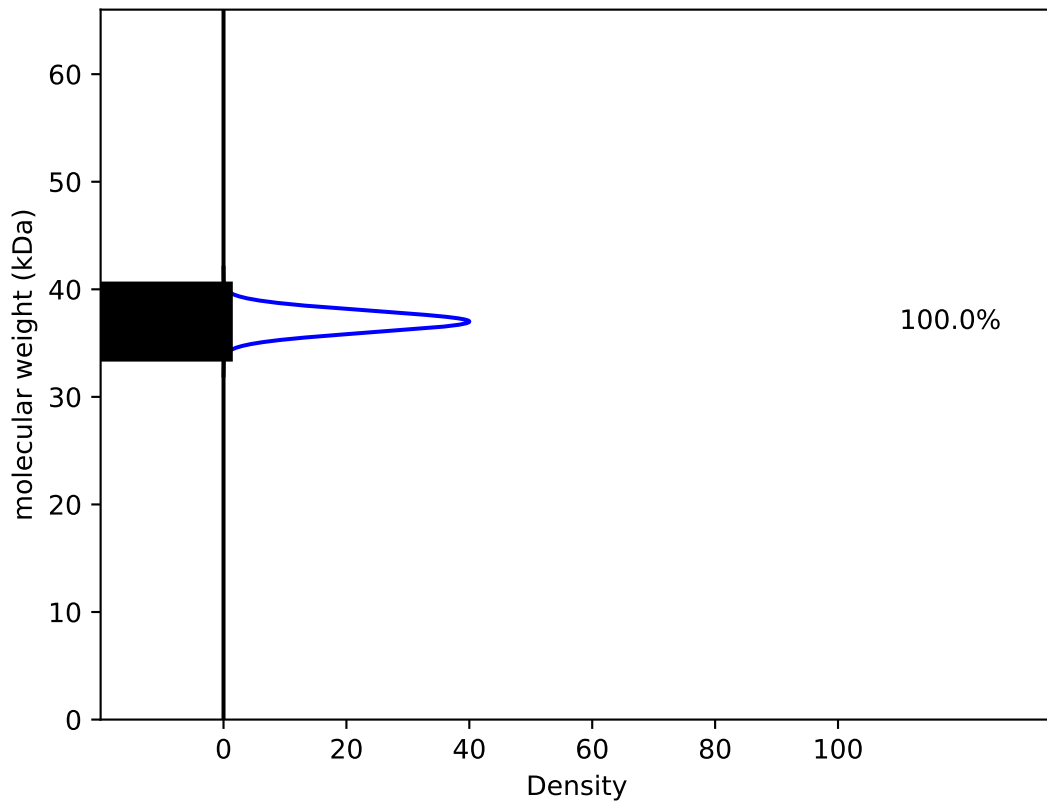

# P14618

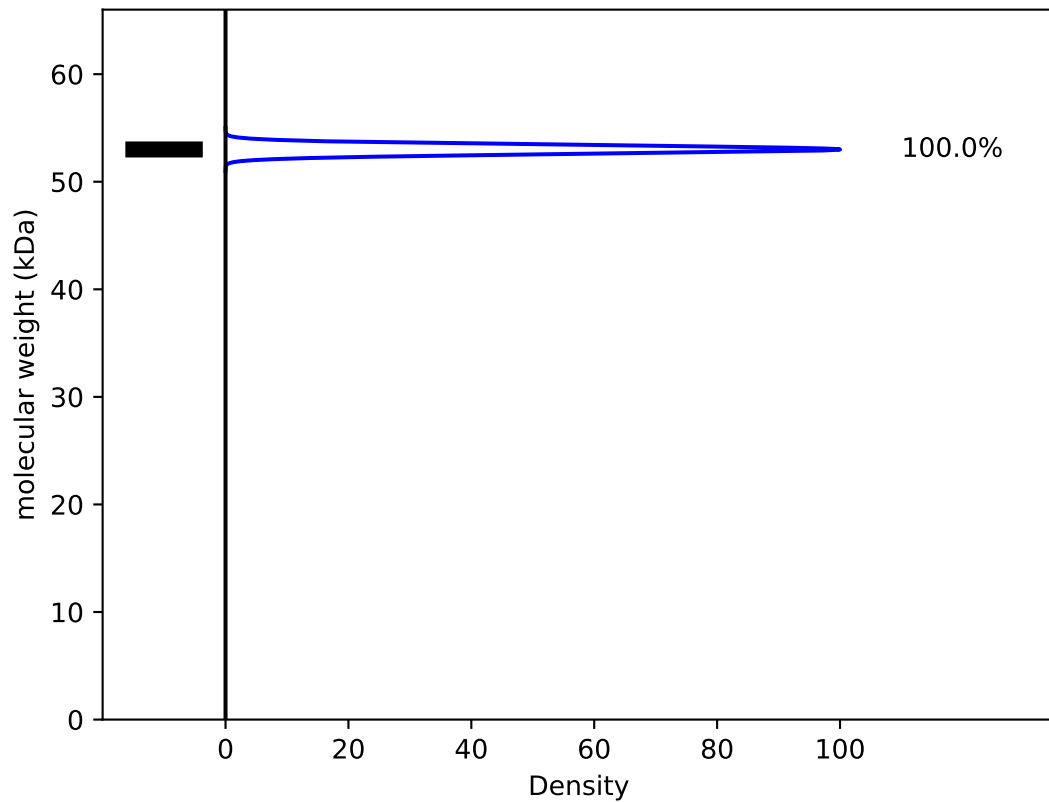

# P30613



# P63162

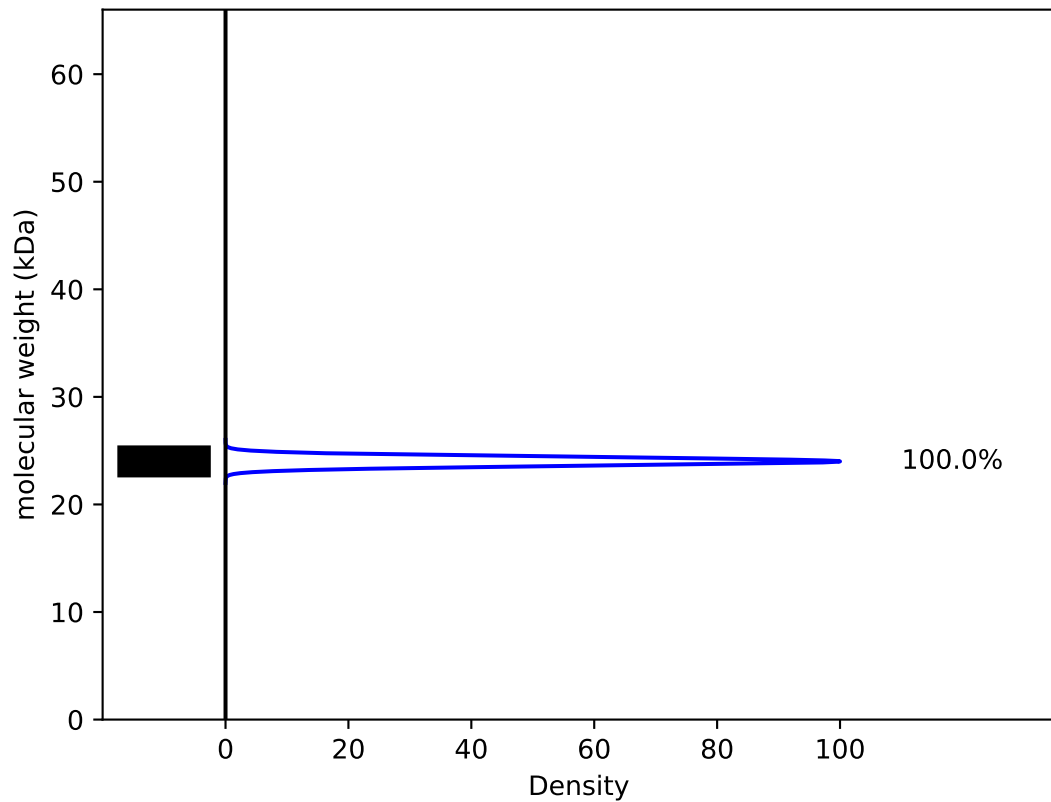

P14678





# Q8WVV9



# P14868

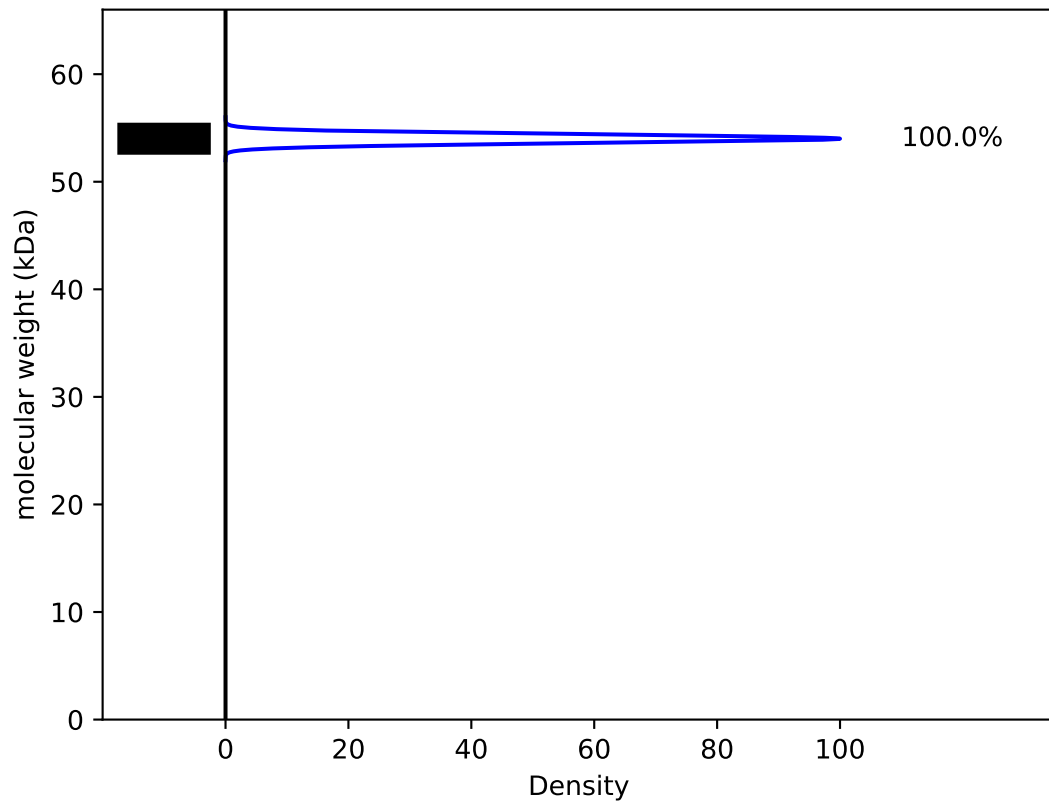

# P15121

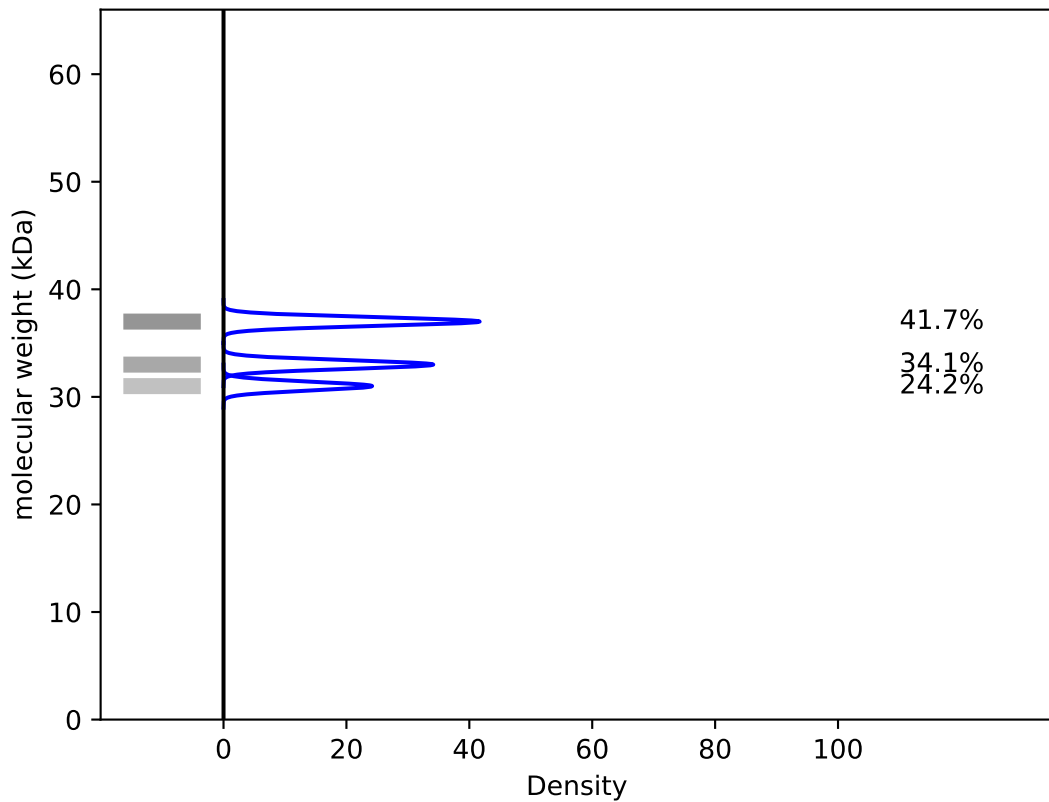

# C9JRZ8

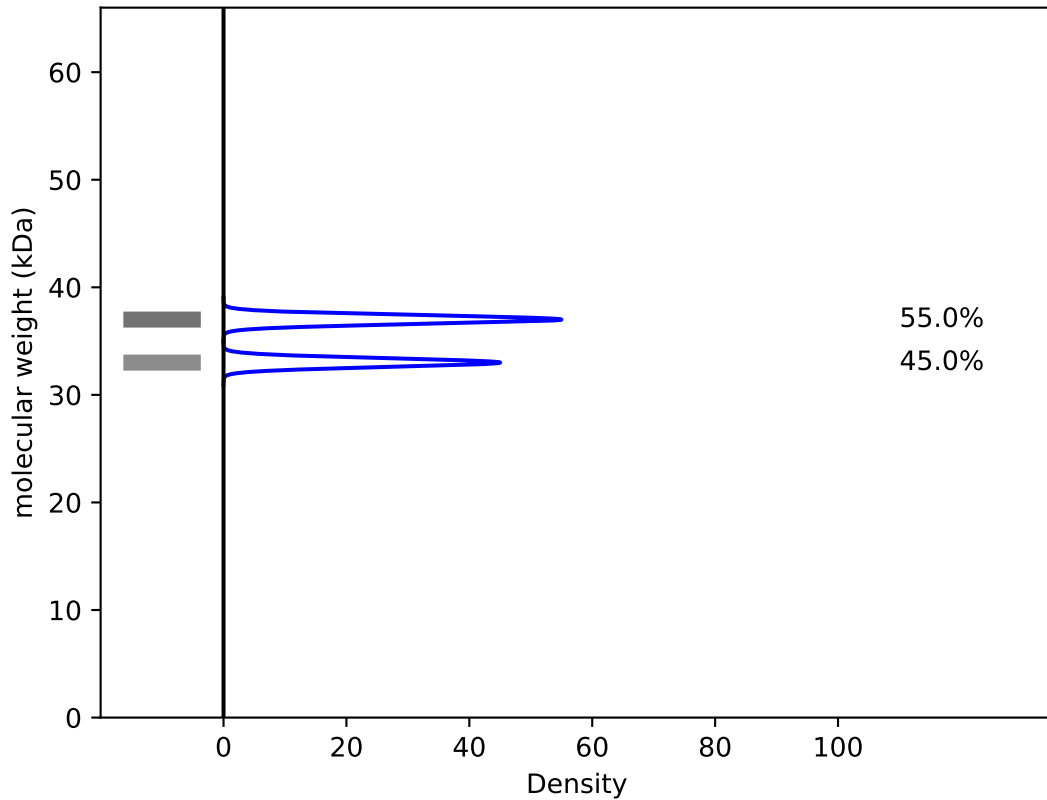

P15328

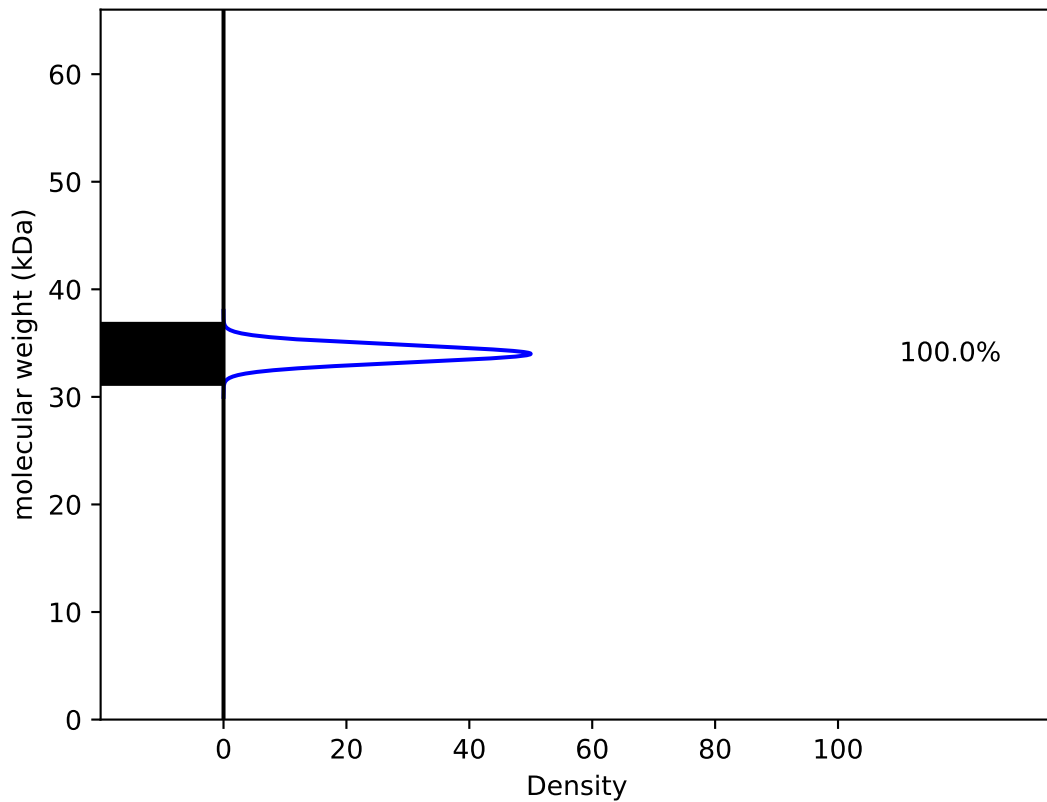

# P15531

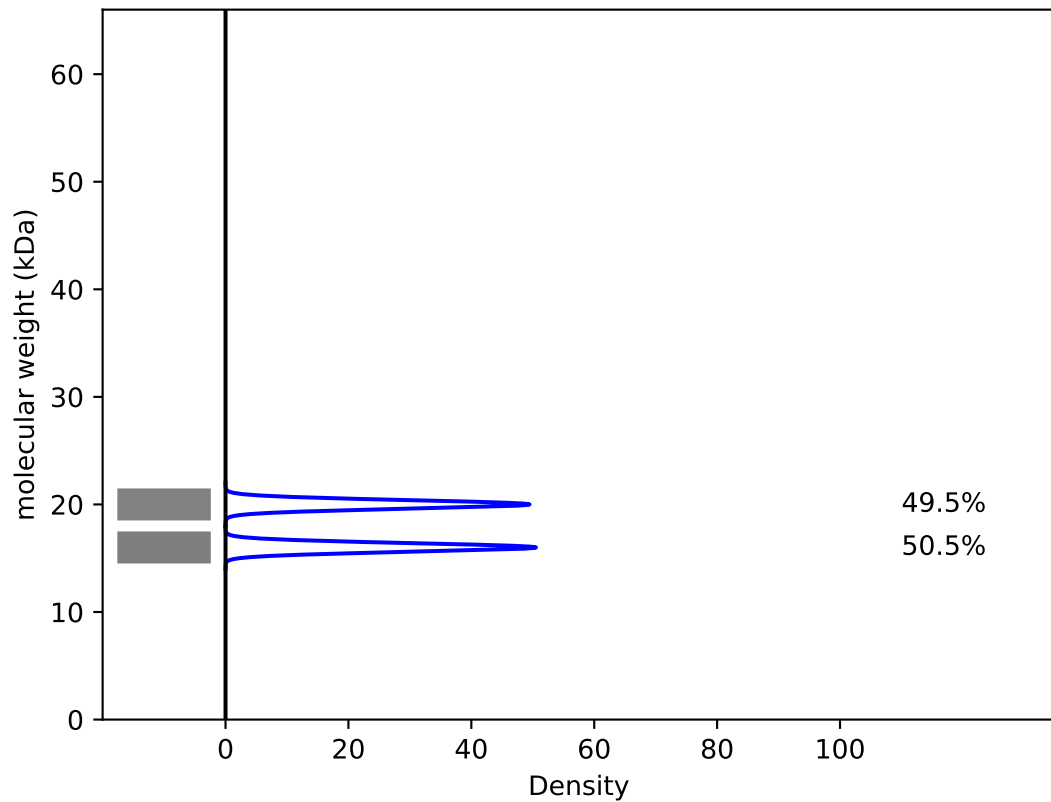

# P15559

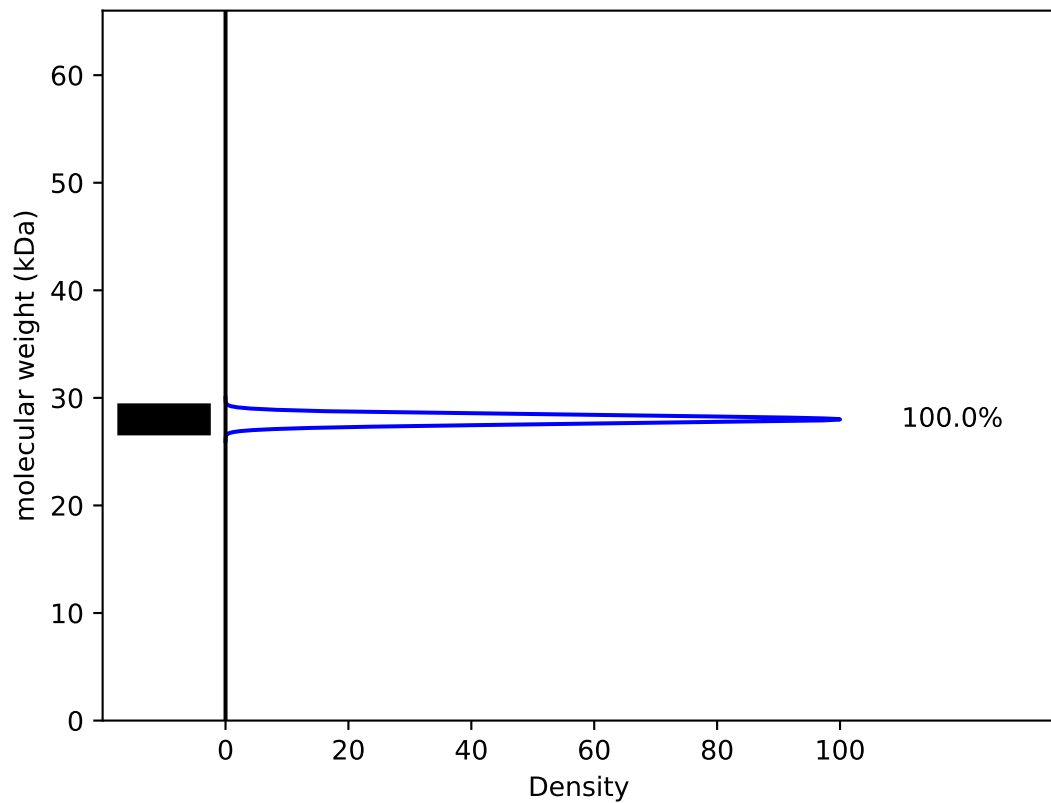

# P15880

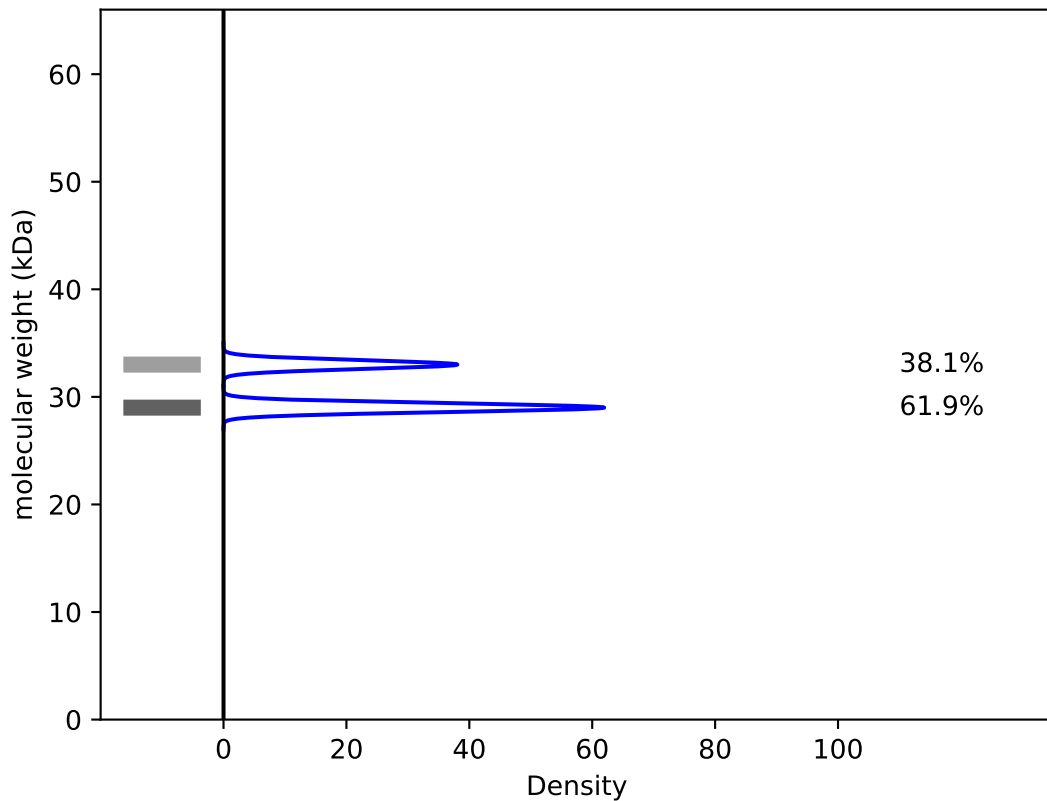



P15927

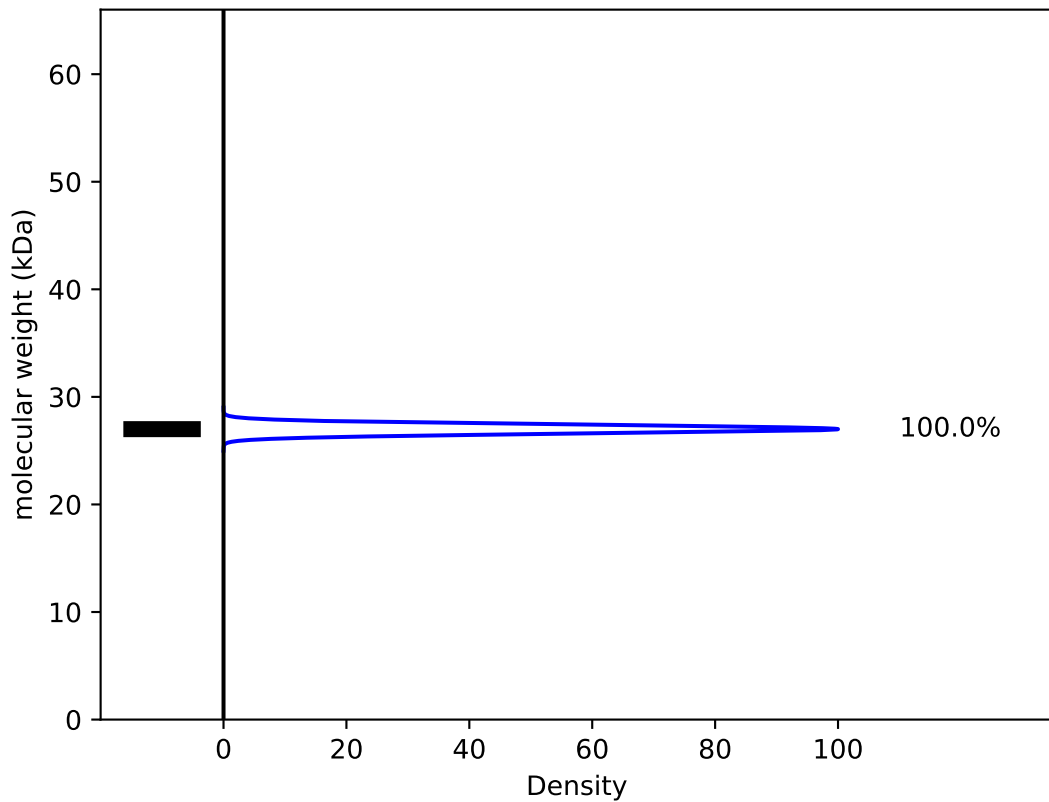

# P16083

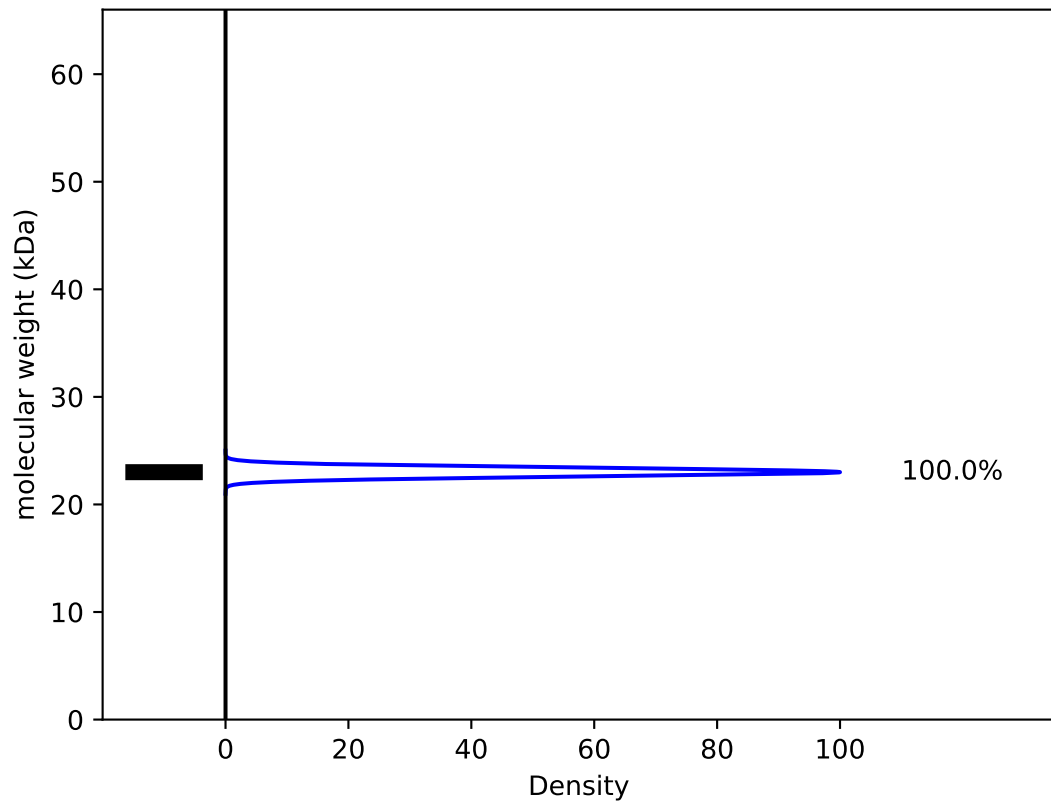

# P16152

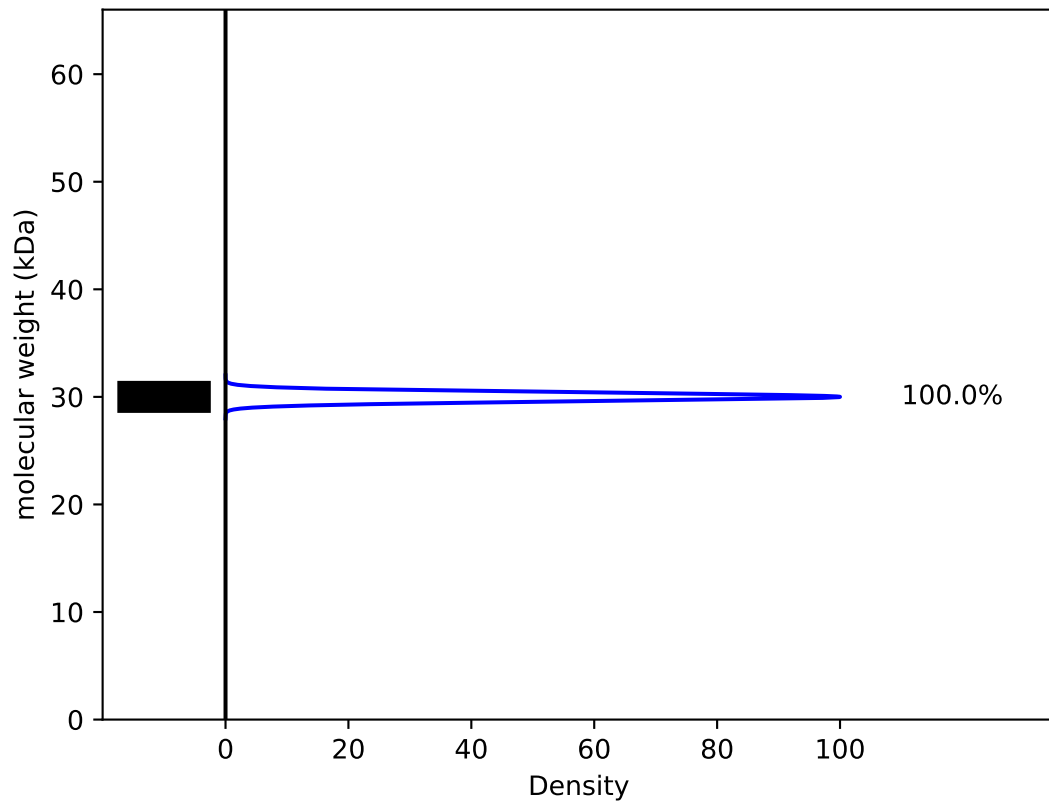

# P16219

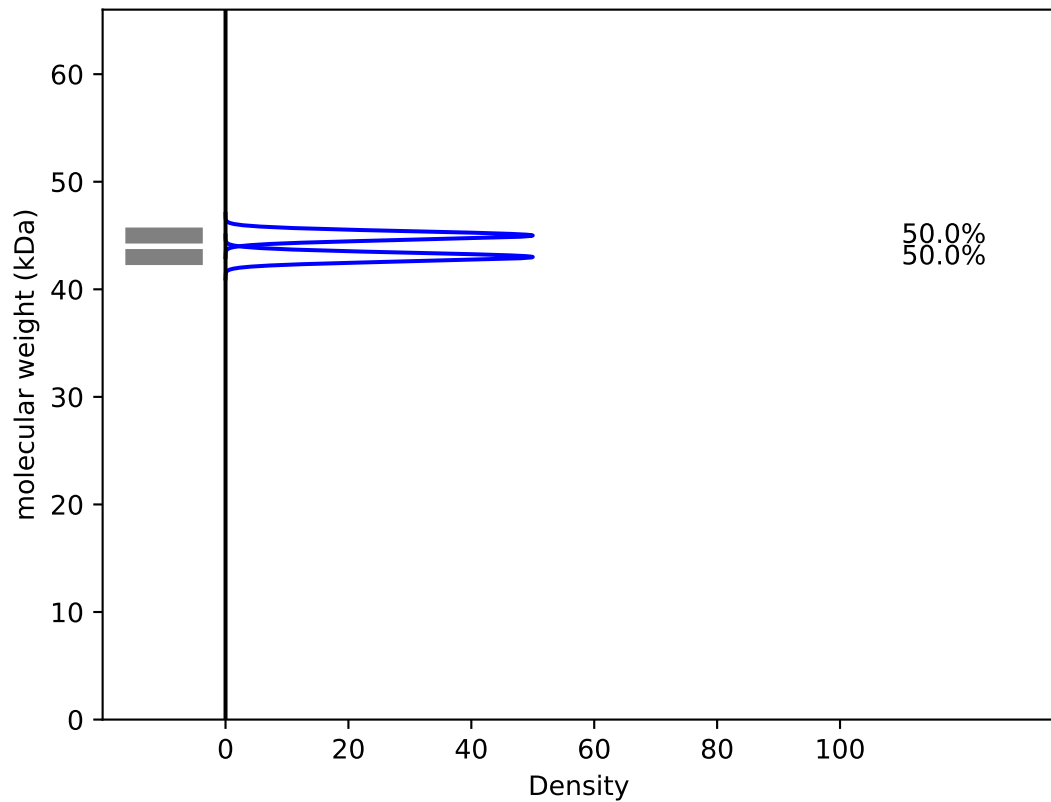

# P16402



# P16930

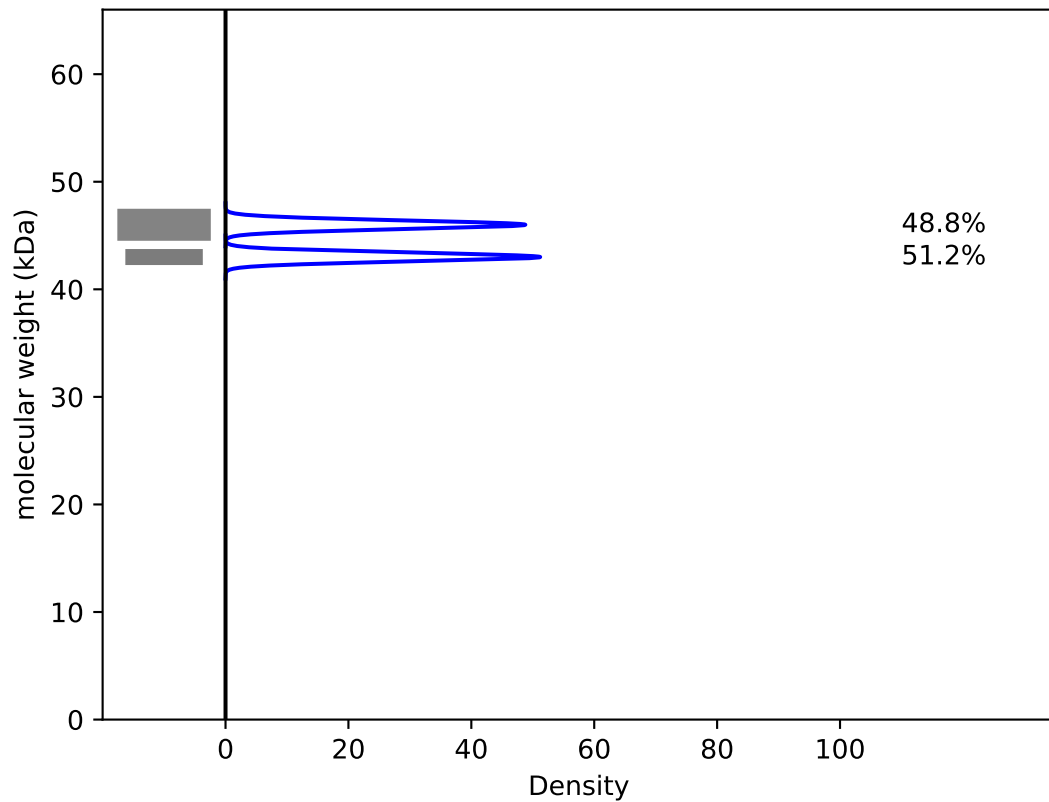

# P16989

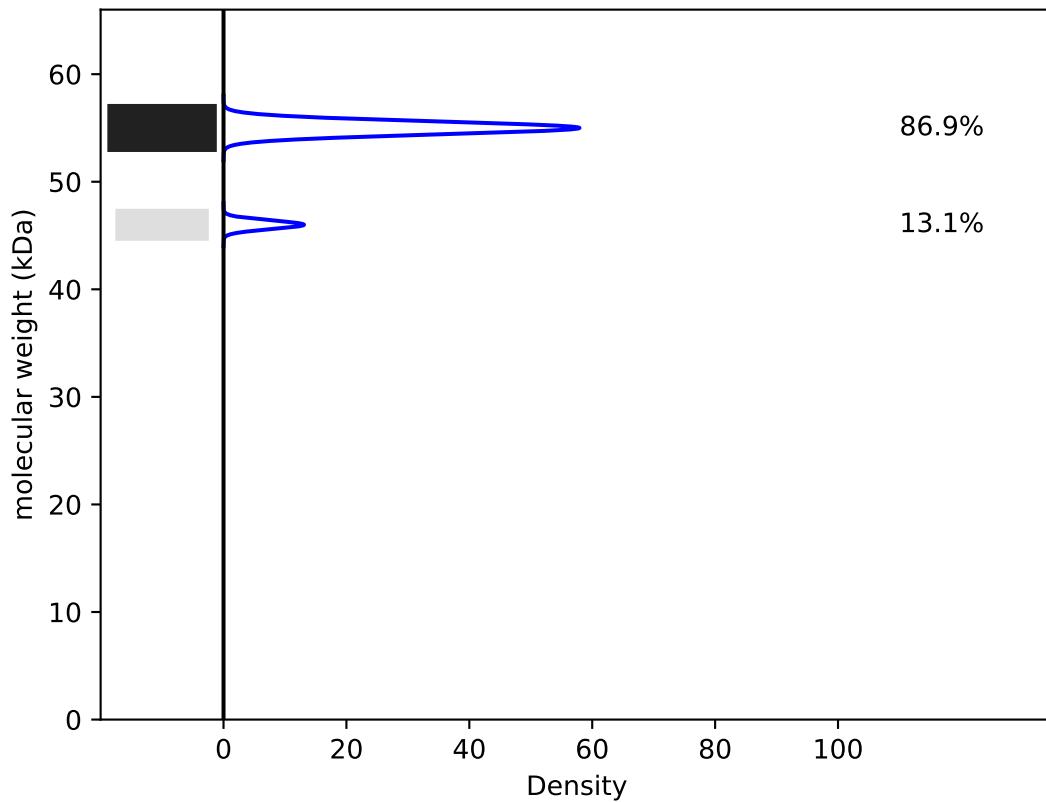

# P17612

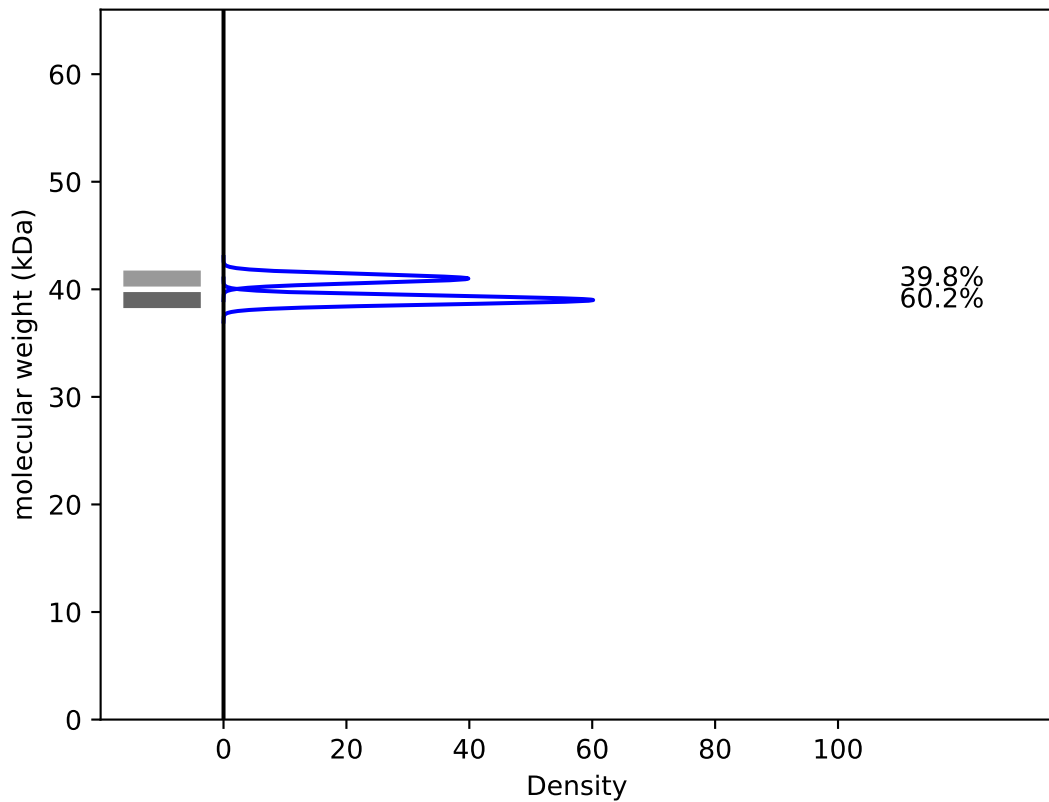



P22612

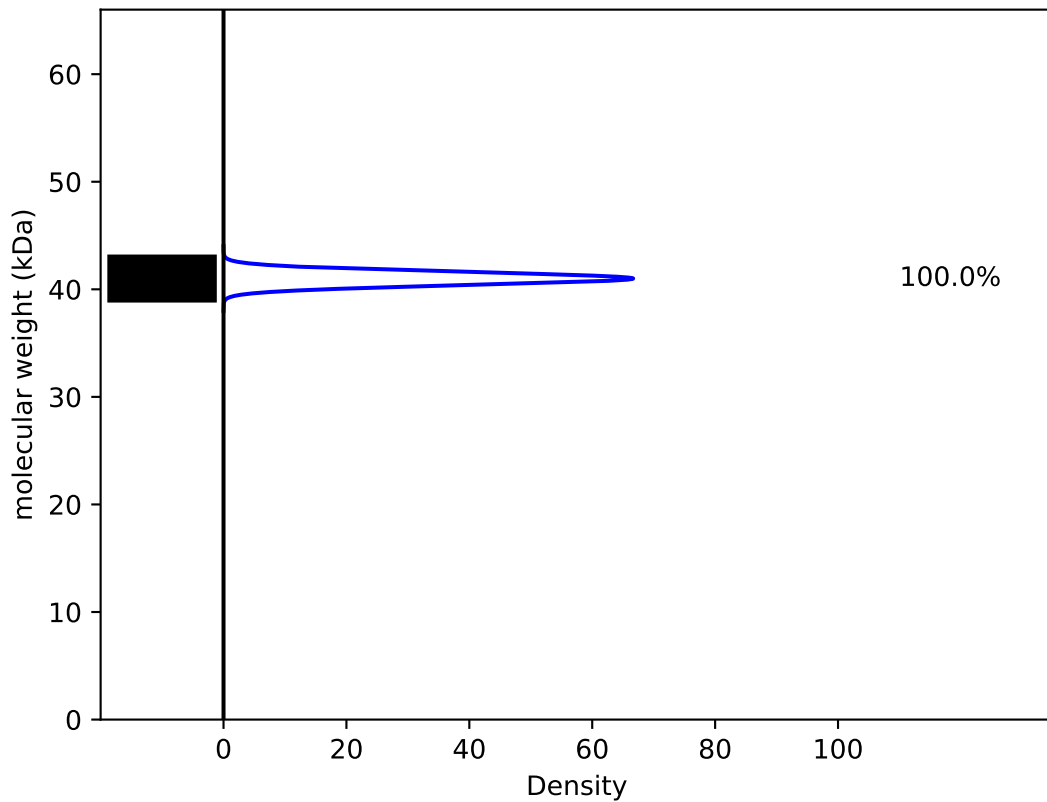

# P17931



# P17980

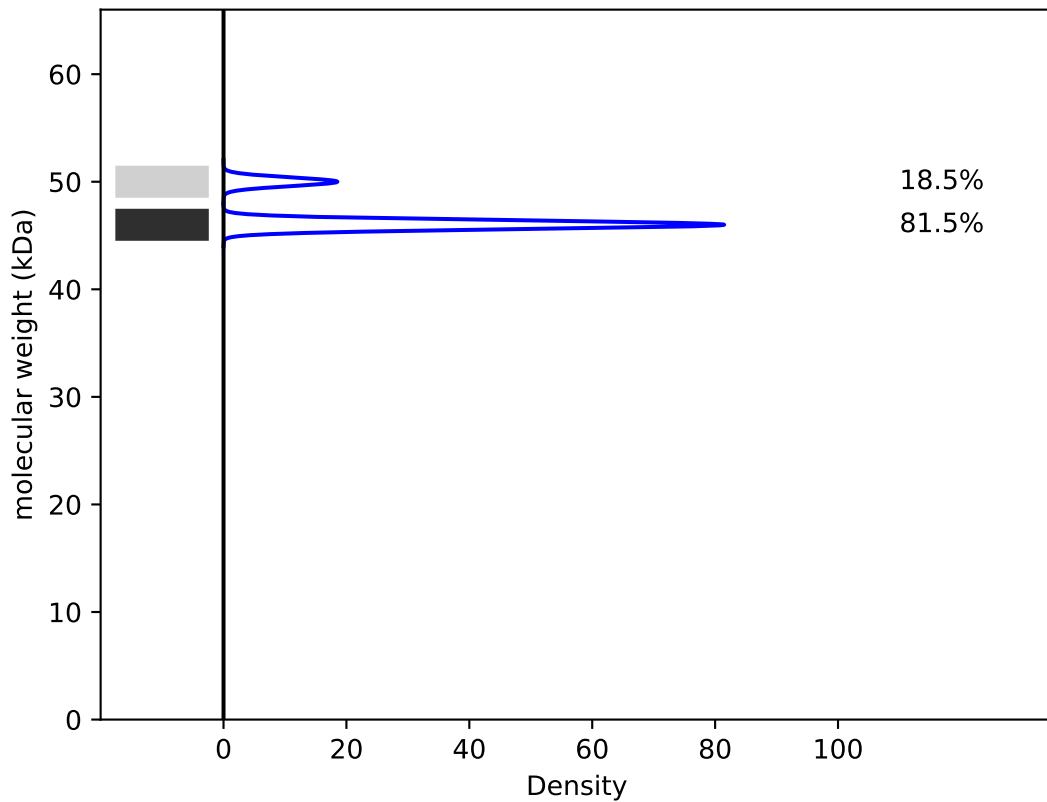

# P17987

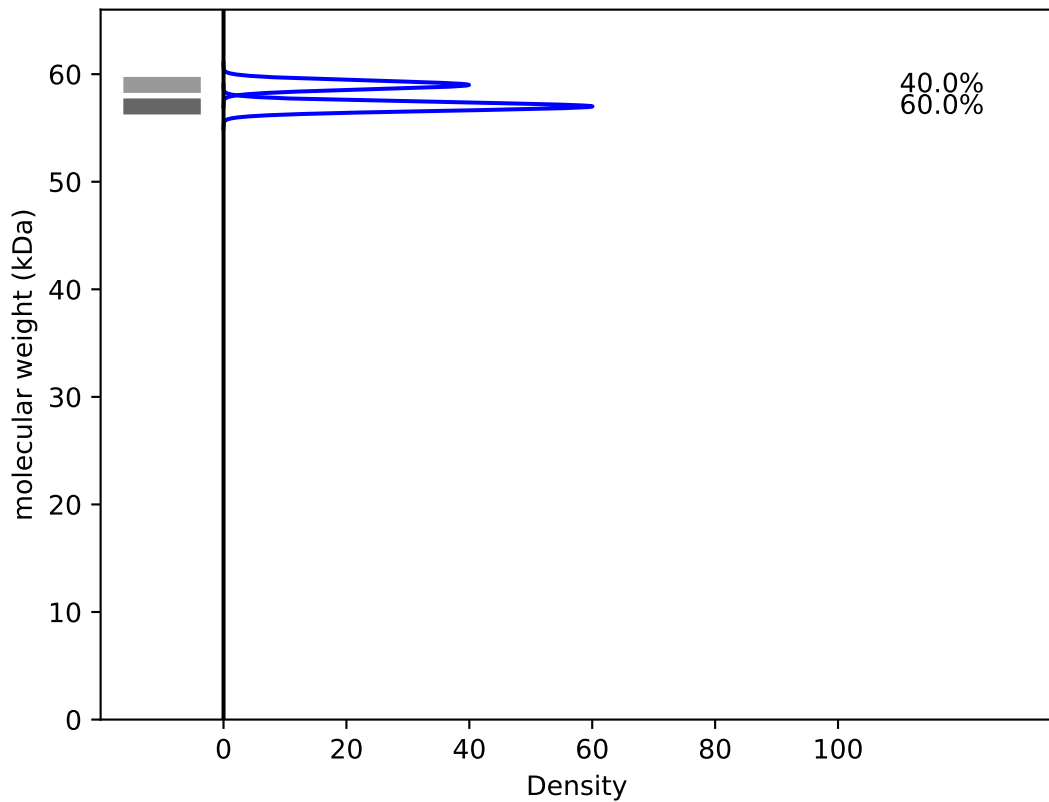

# P18031



# P18085

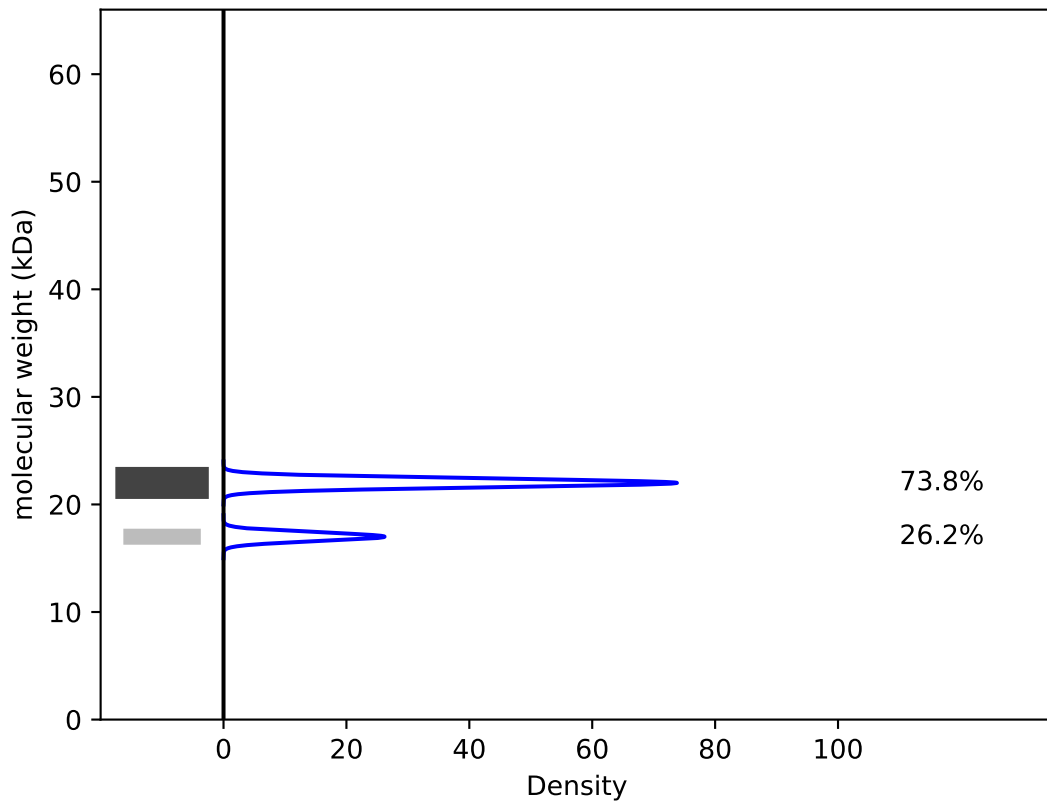

P18124

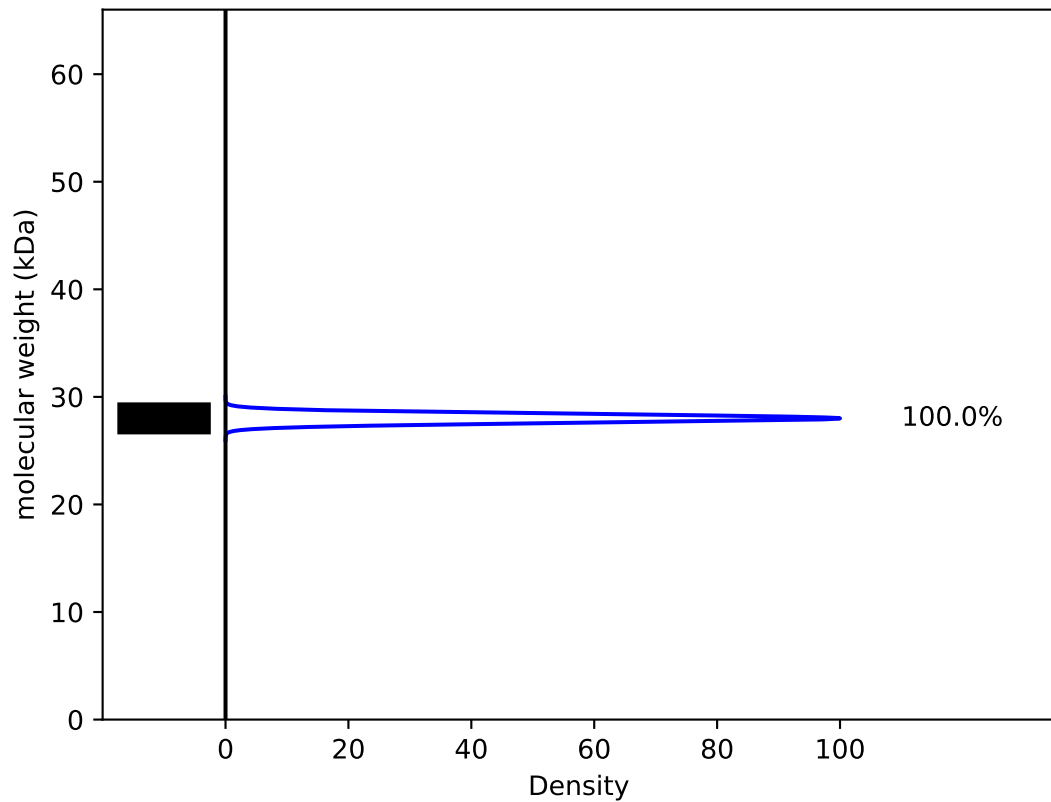

# P18621

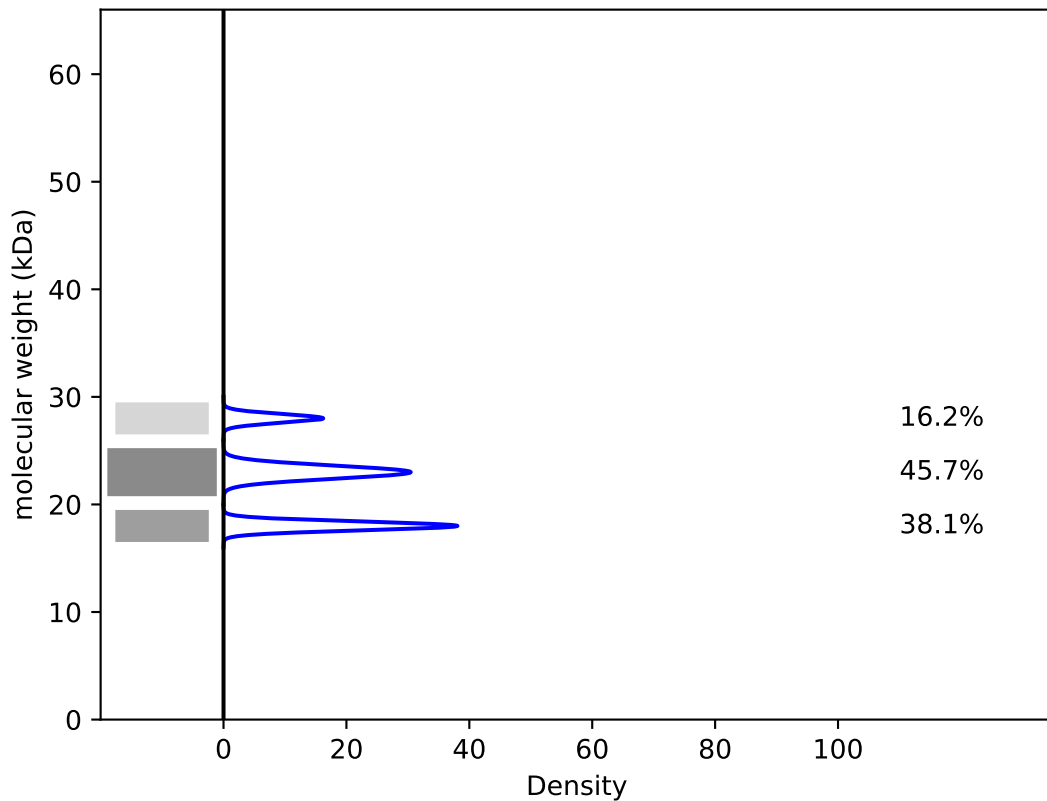



# P18669

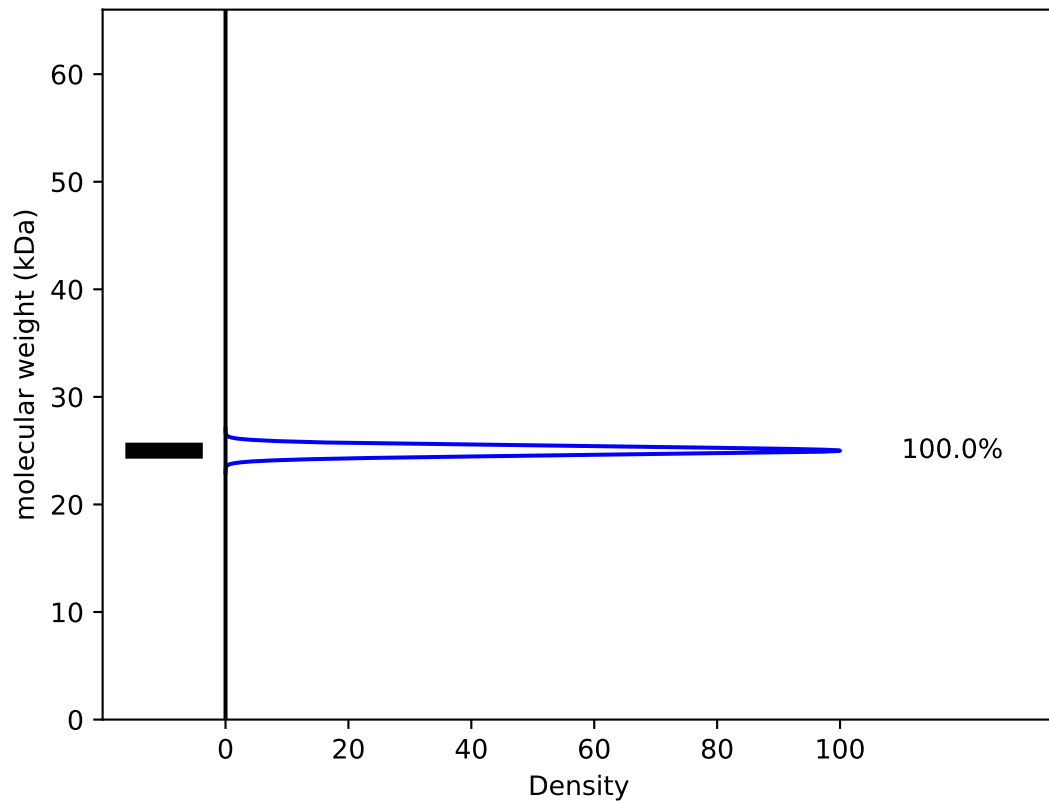

# P15259

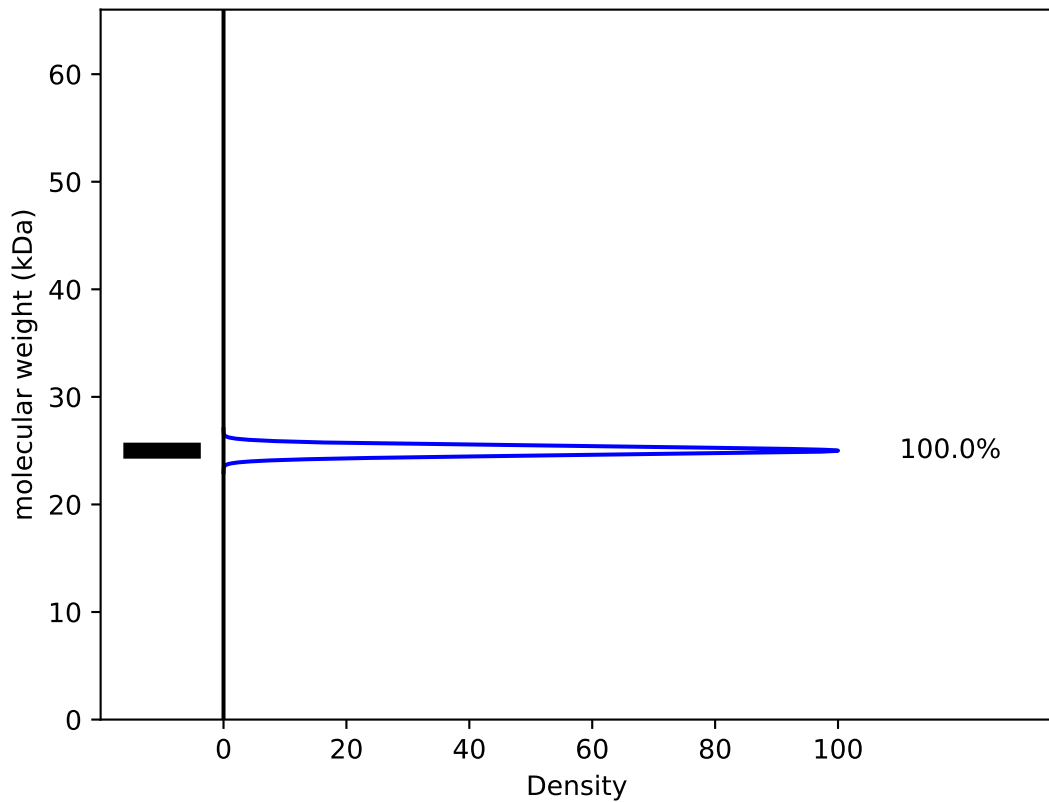

Q8N0Y7



# P18754

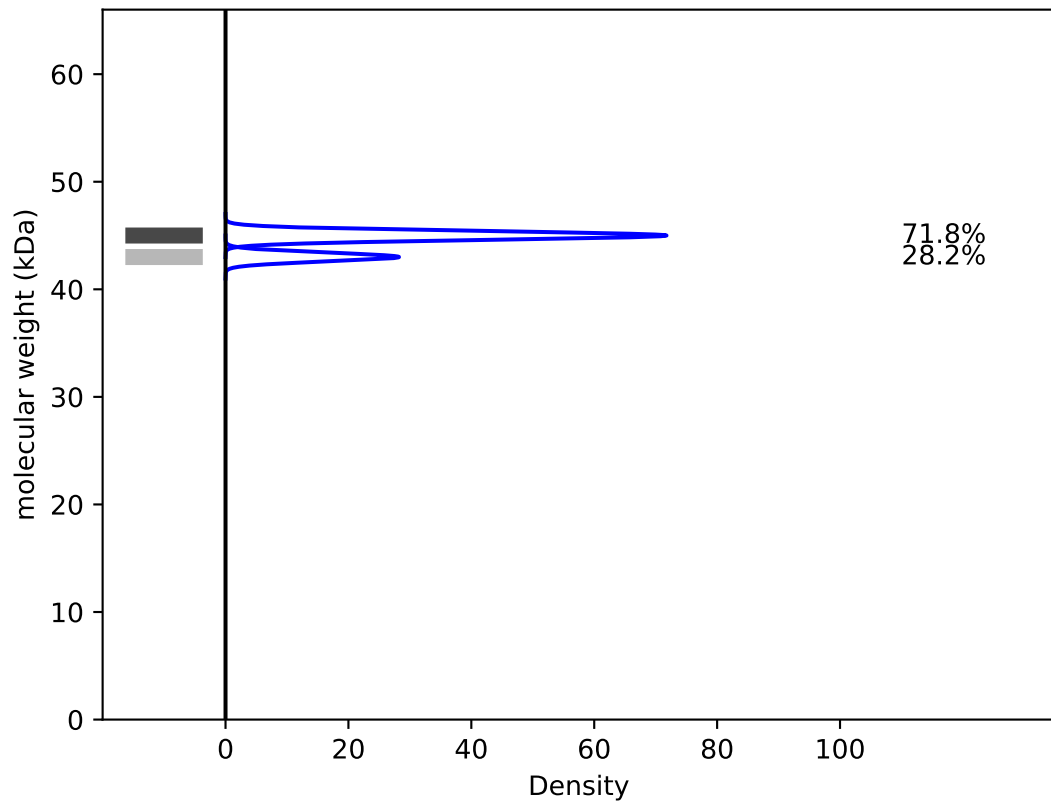

# P19387

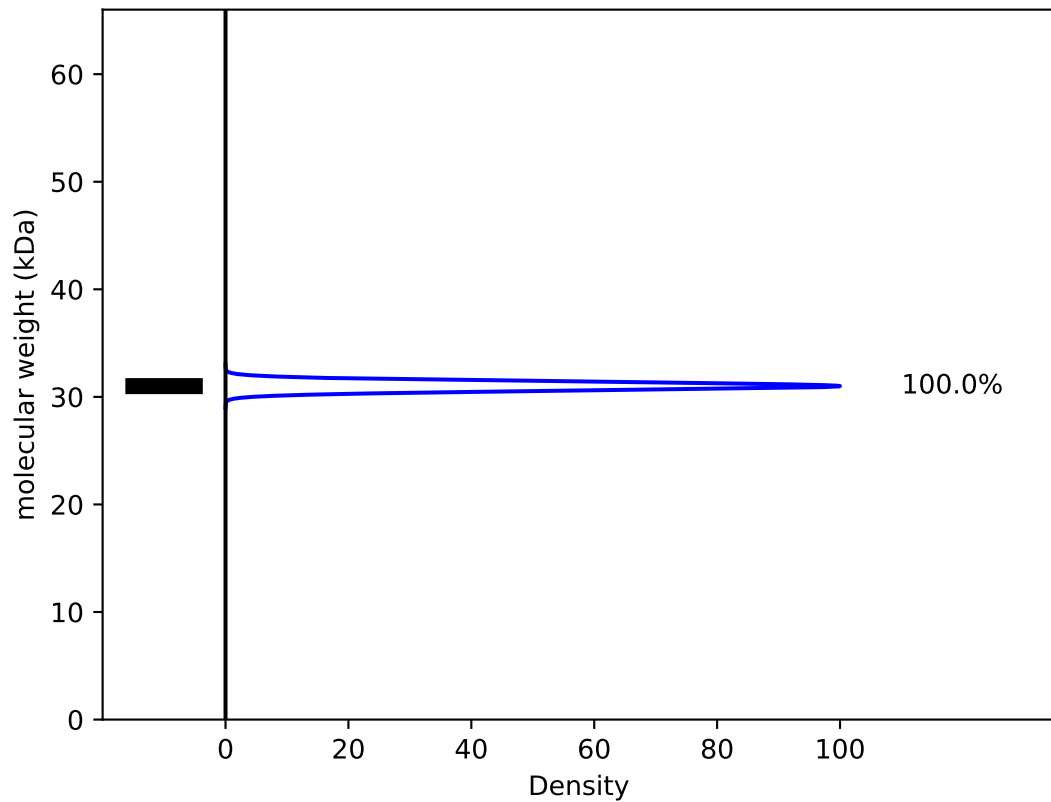

# P19388

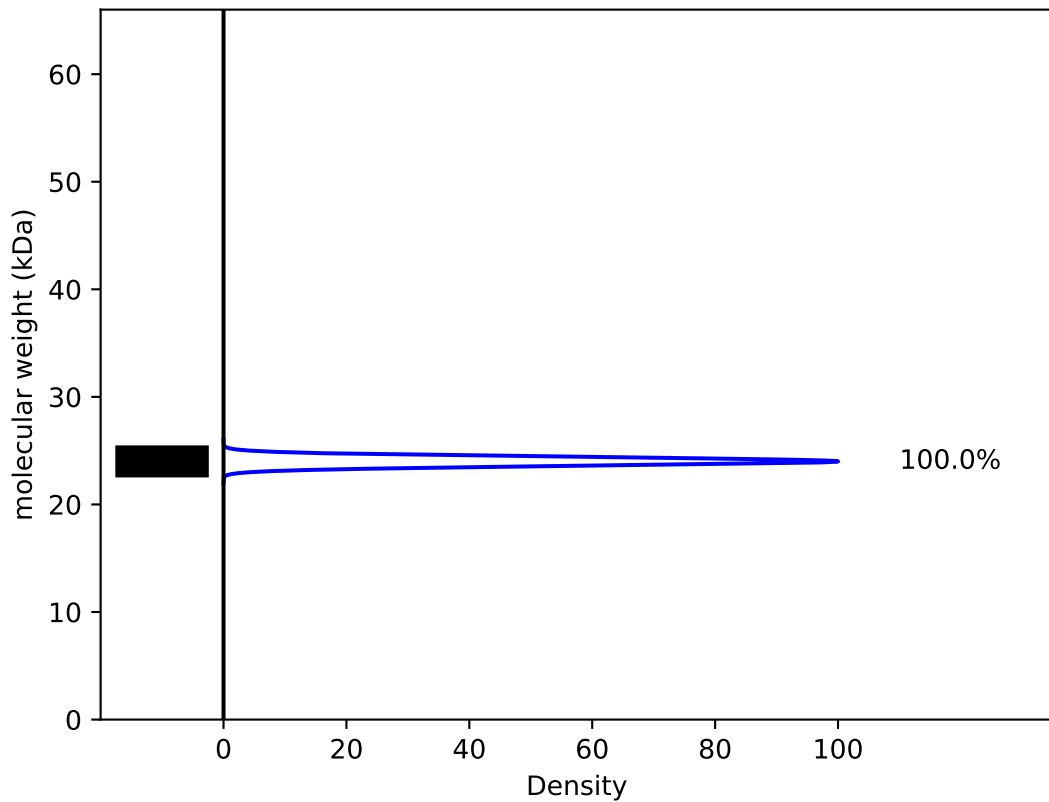

# P19404

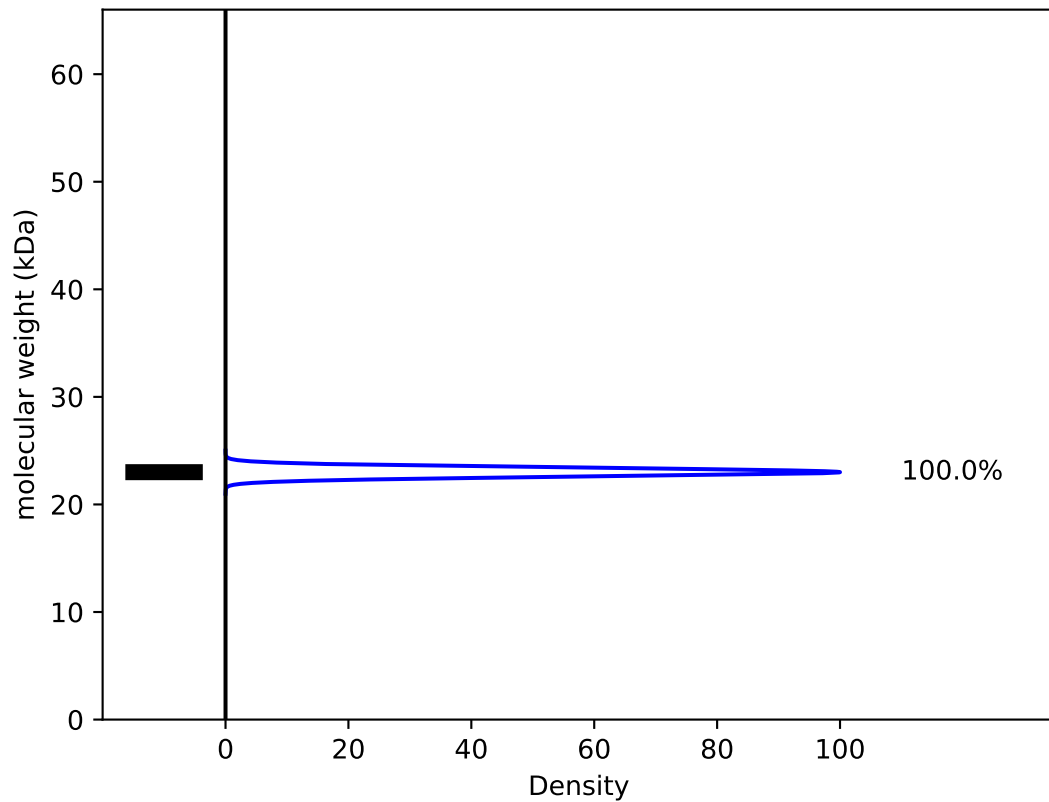

# P19623

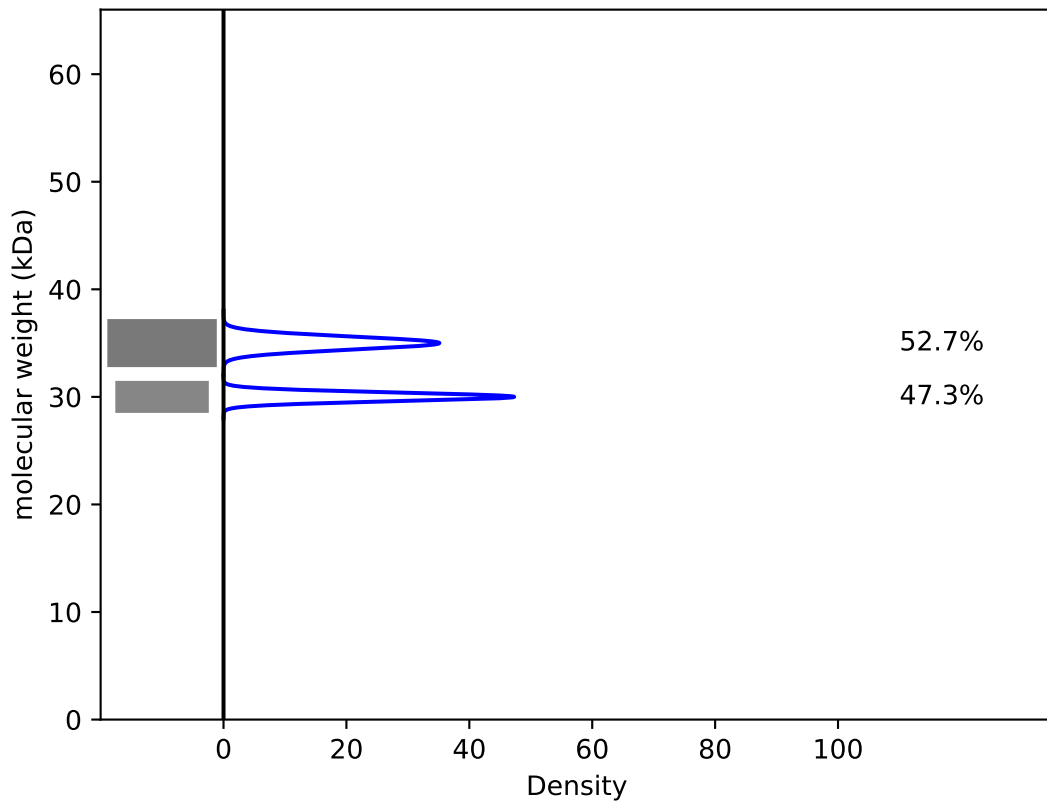



# P19784

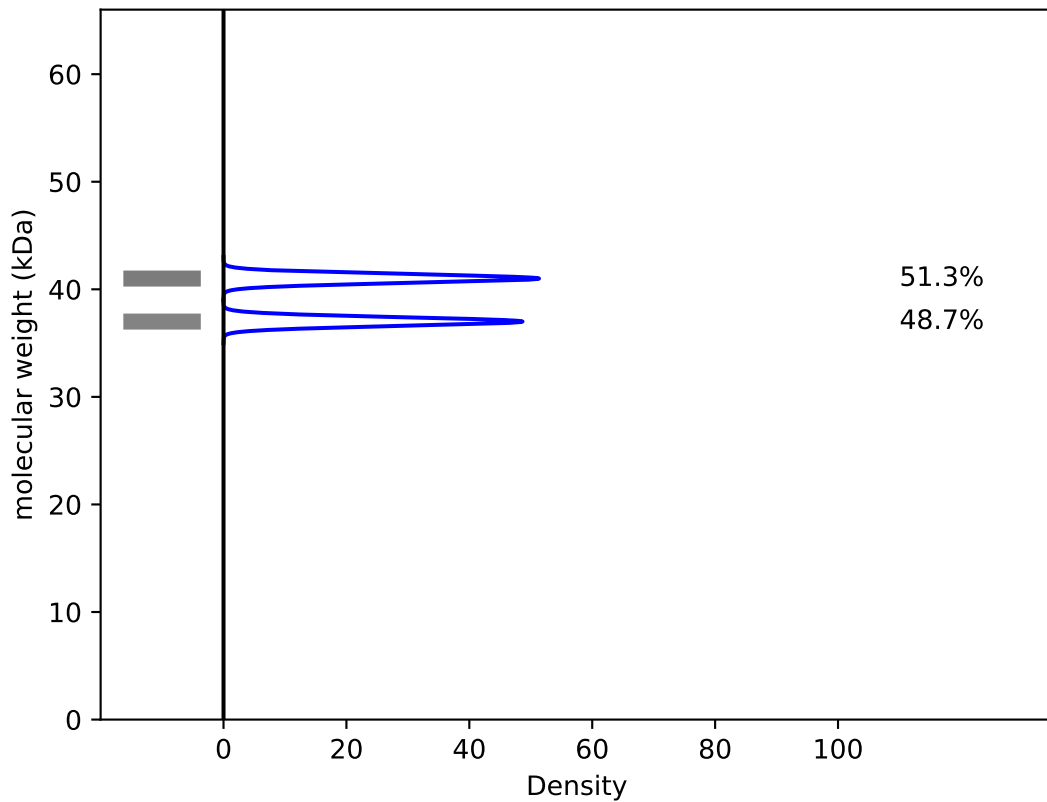

# P20338

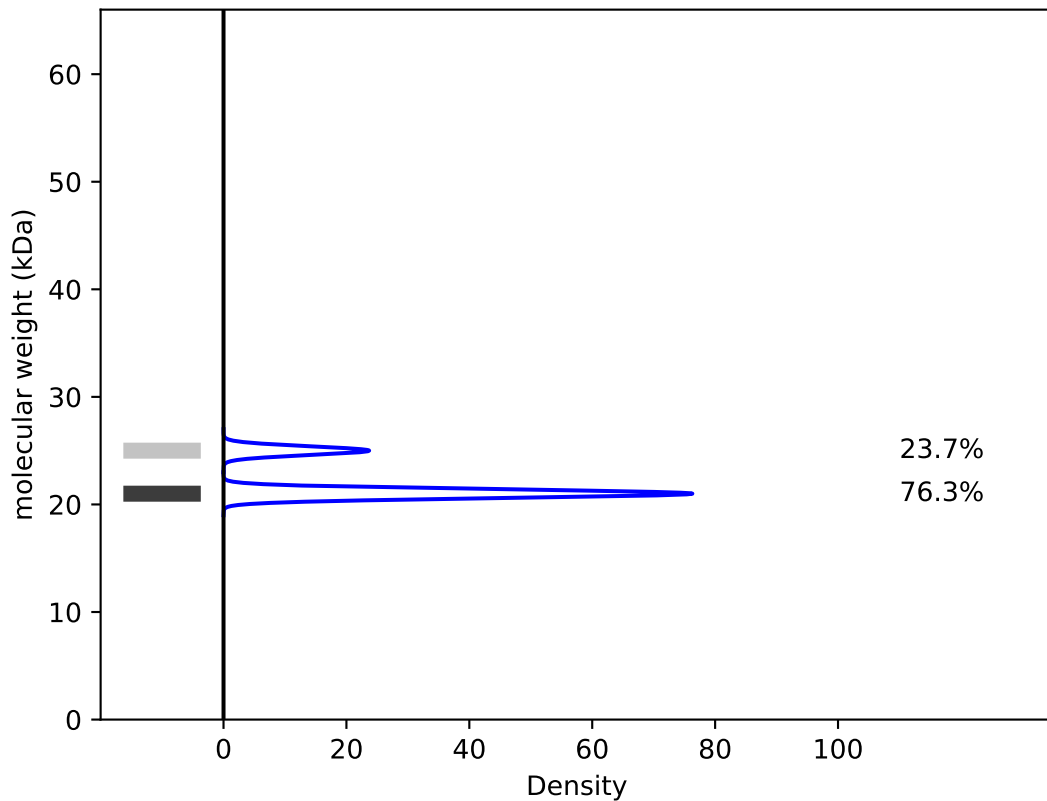

# P61018

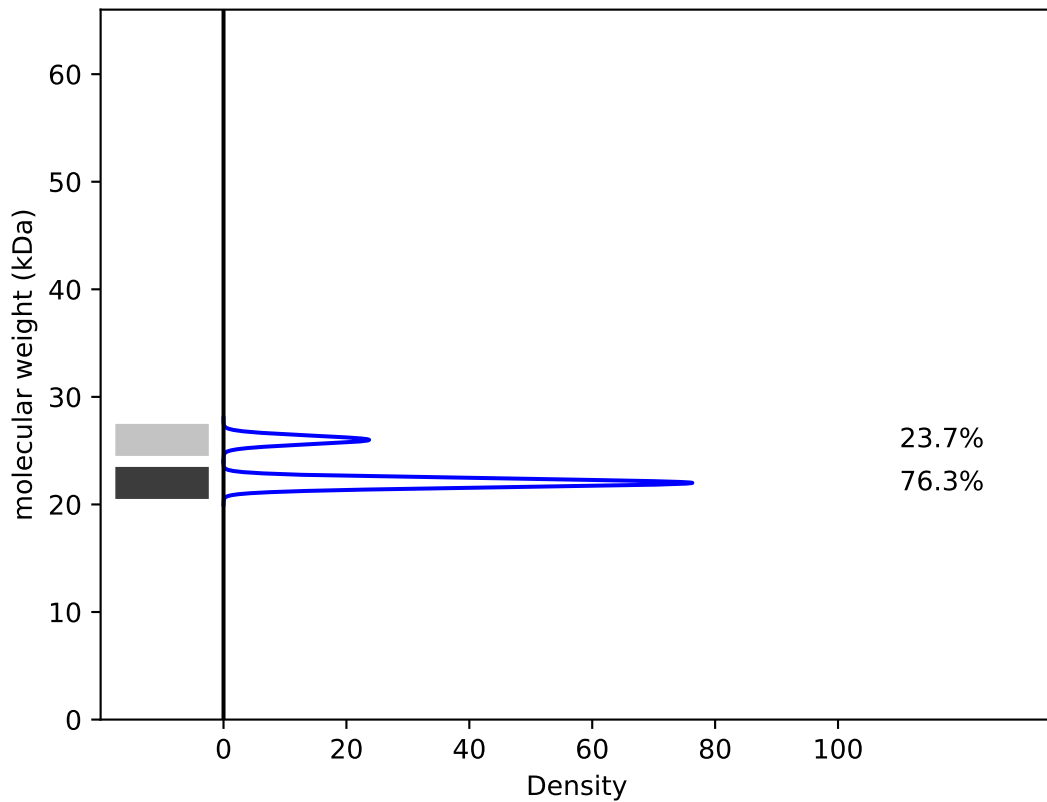

# P20339

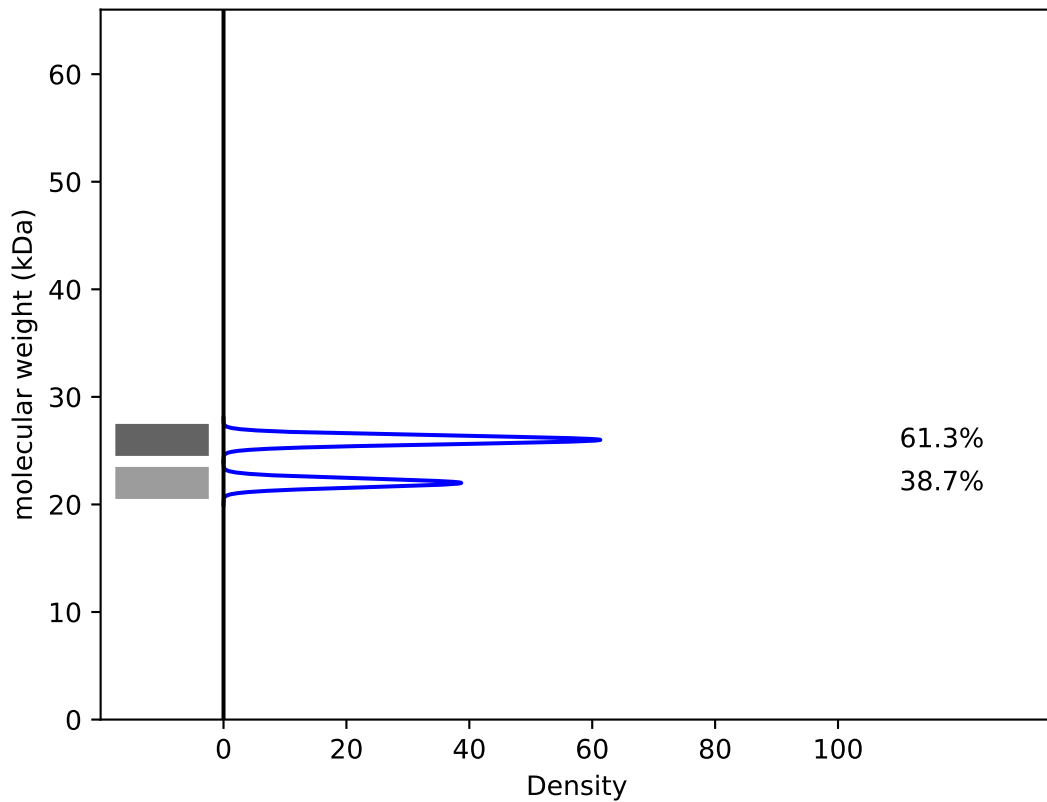

# P20340



# Q9NRW1



# P20645

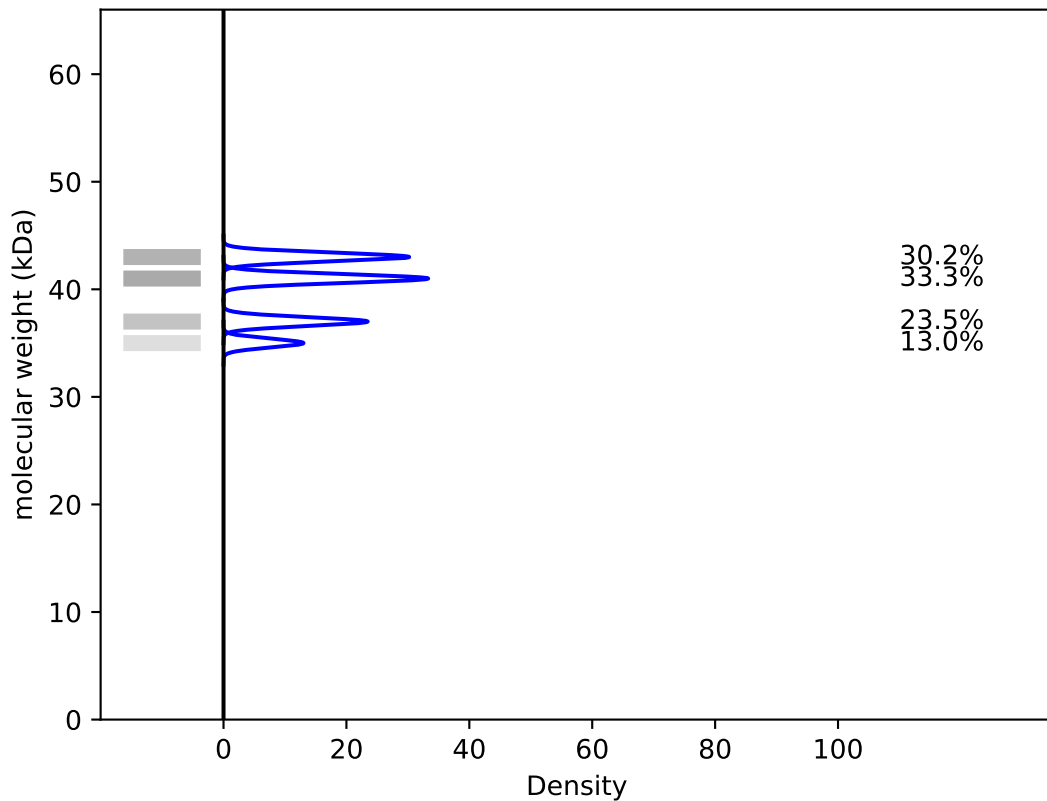

# P21266





P46439



# P21281



# P15313



P21283



# P21291



P21796



# P21964

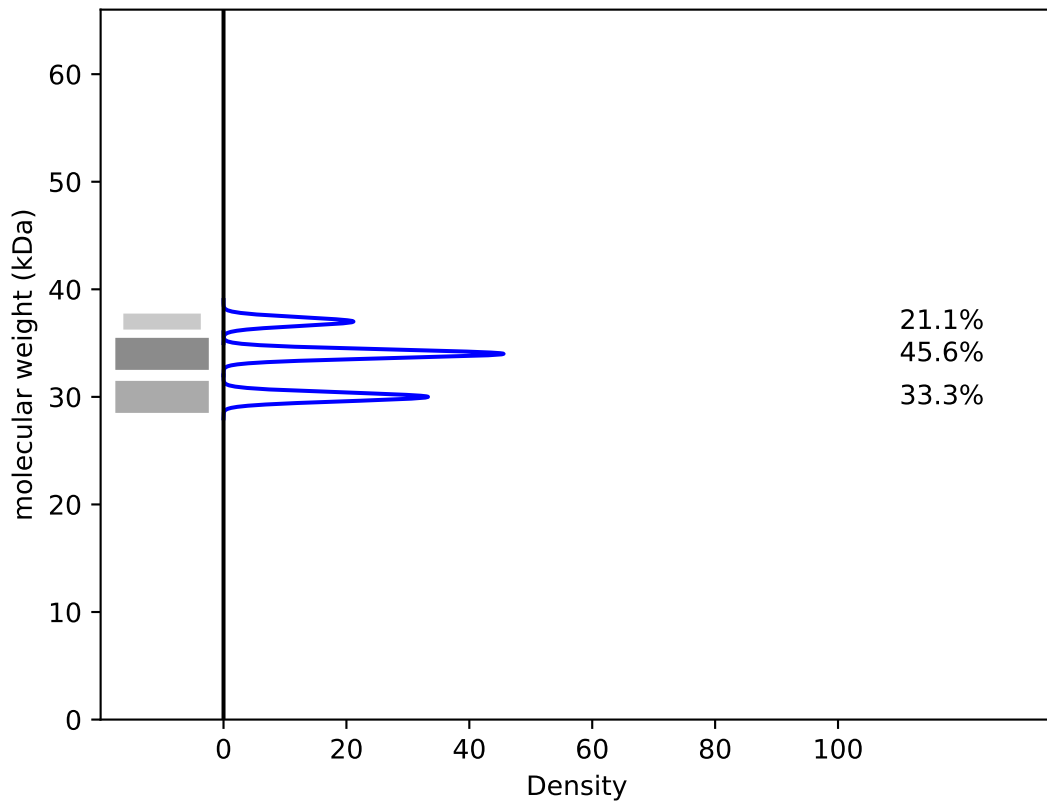

# P22061

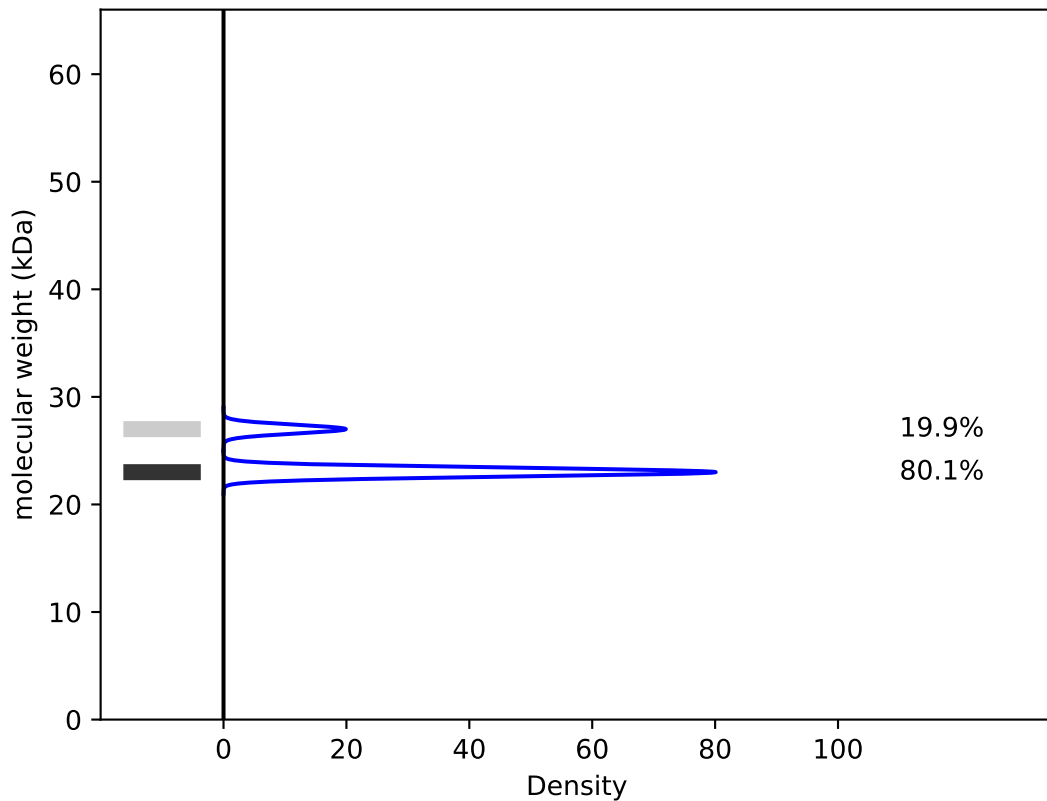



# P22087

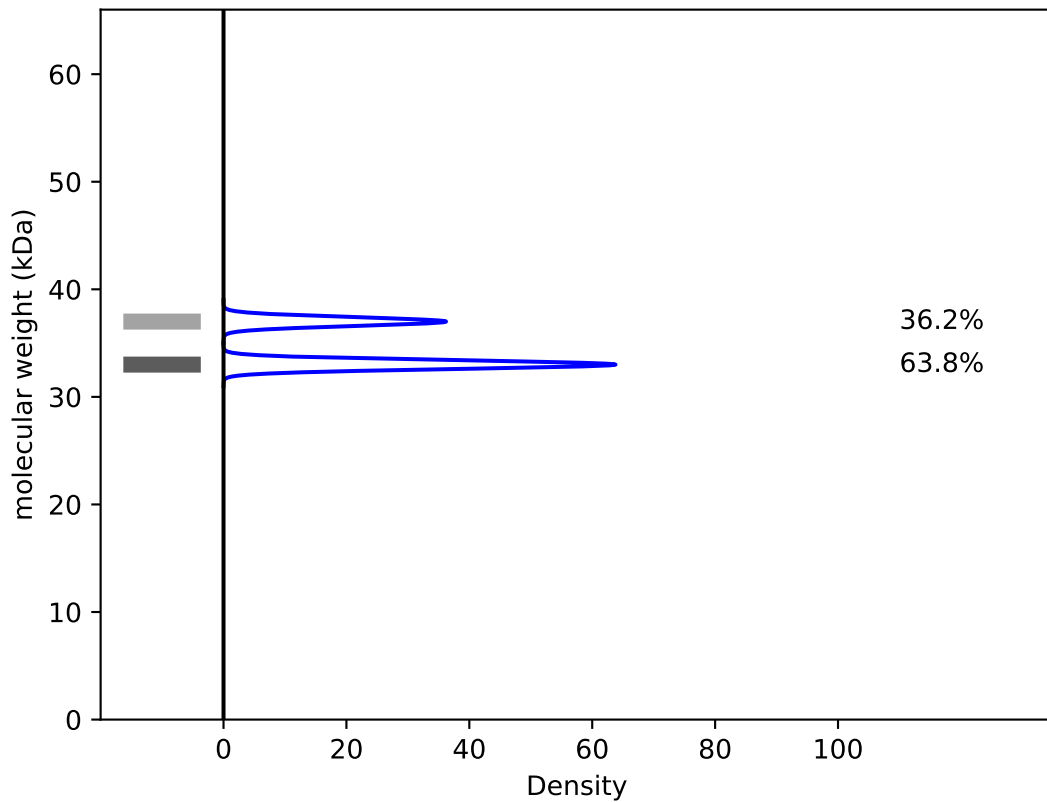

P22234

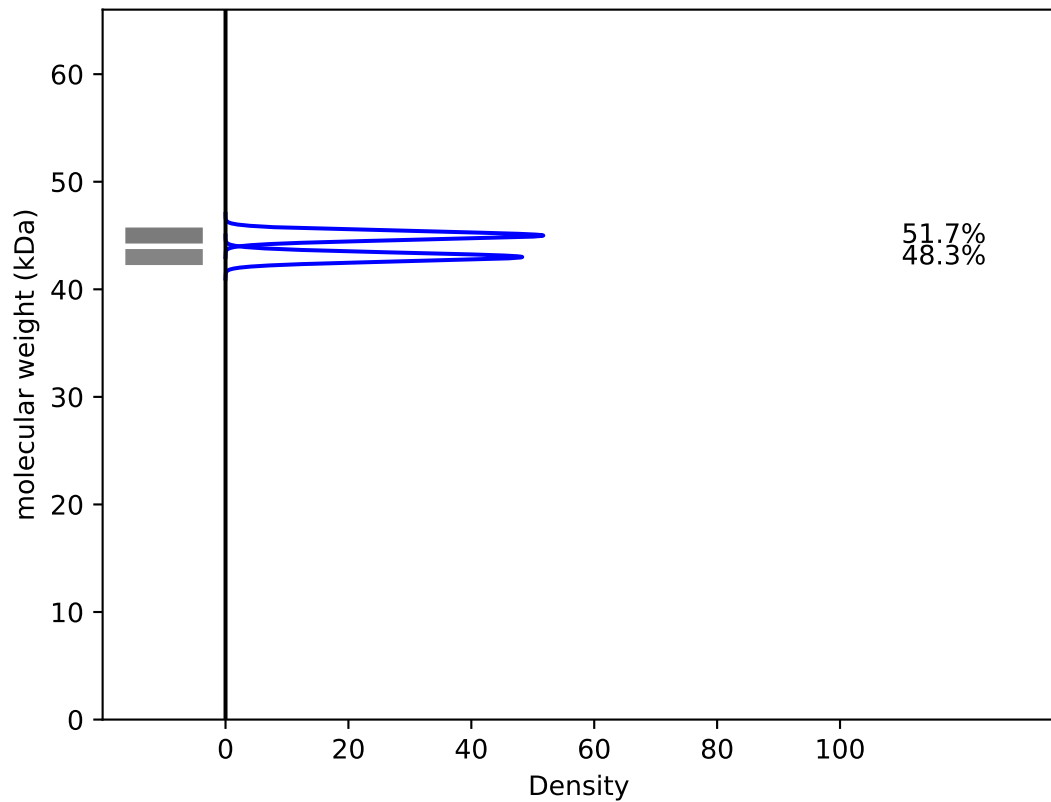

# P22392

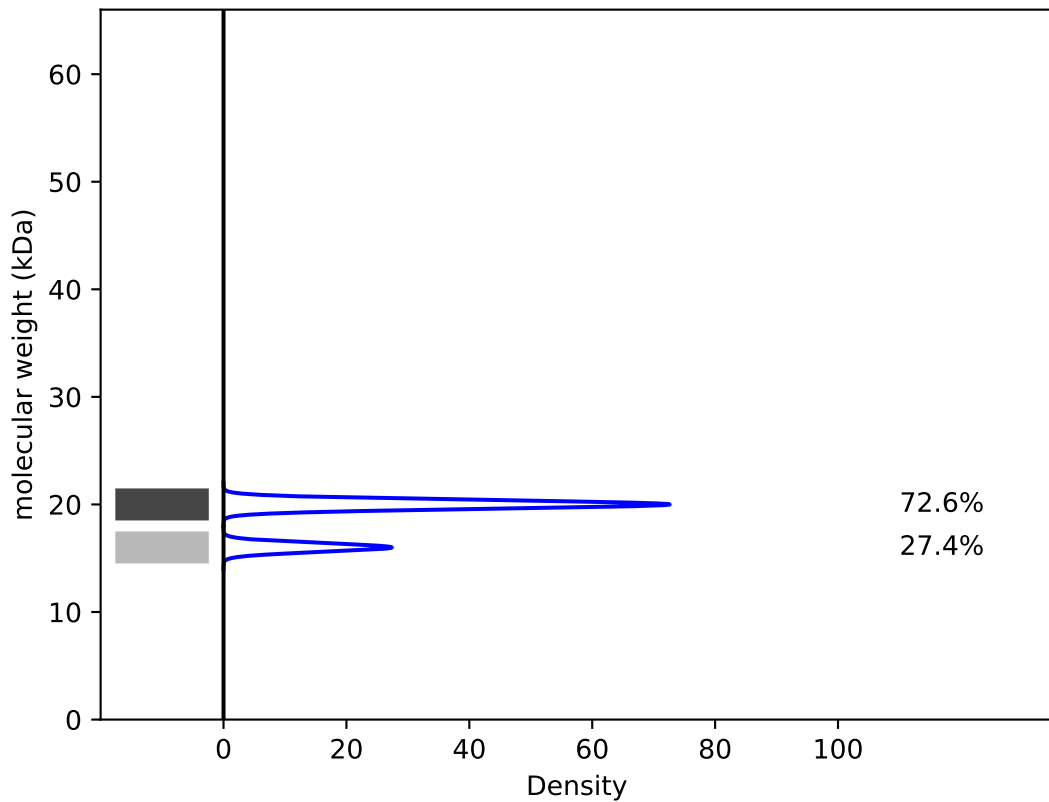

# O60361

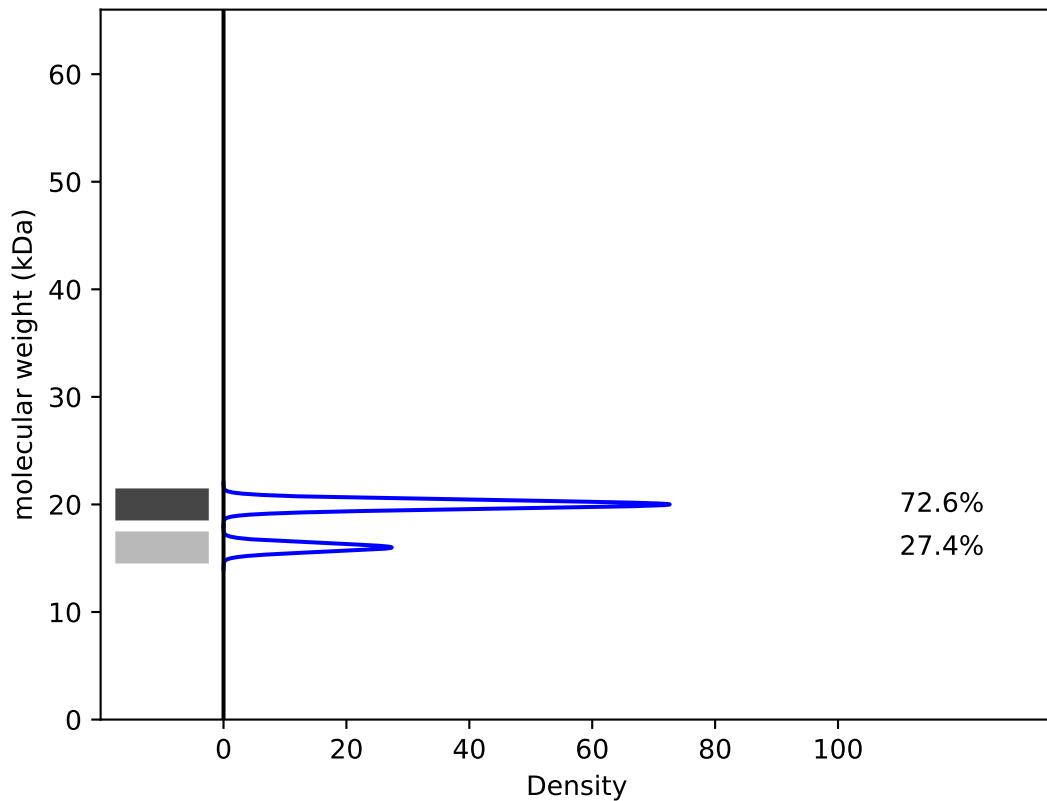

P22626

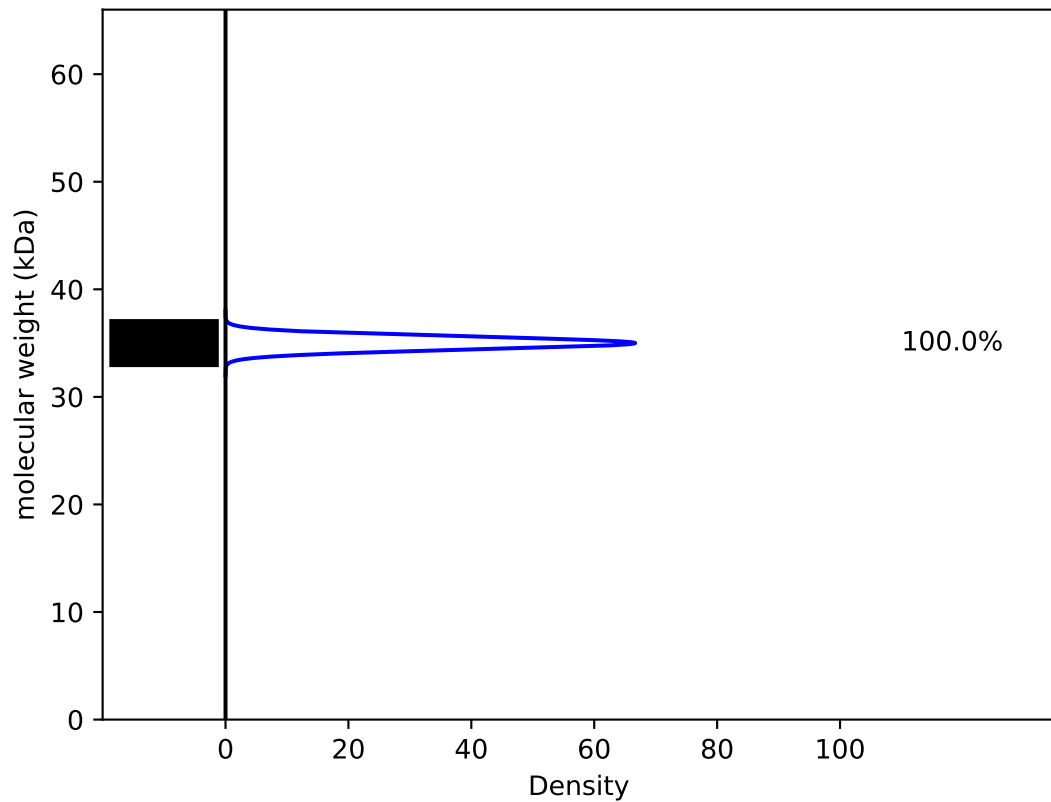

P22695

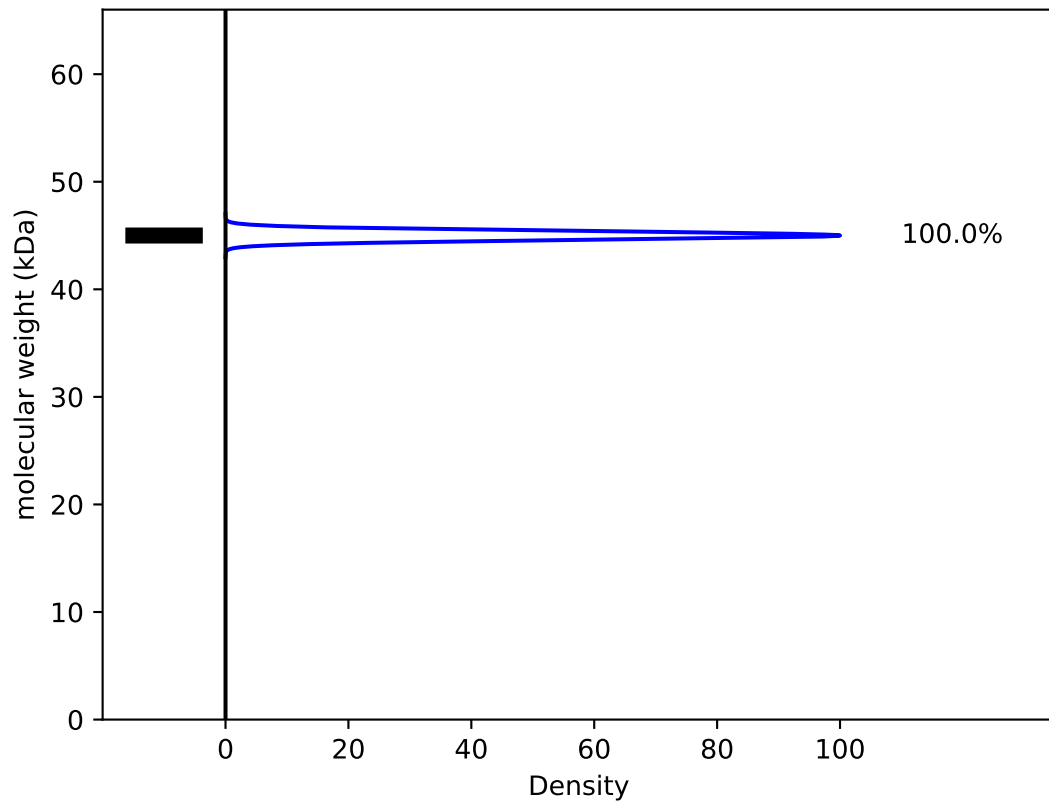

# P22830



# P23193

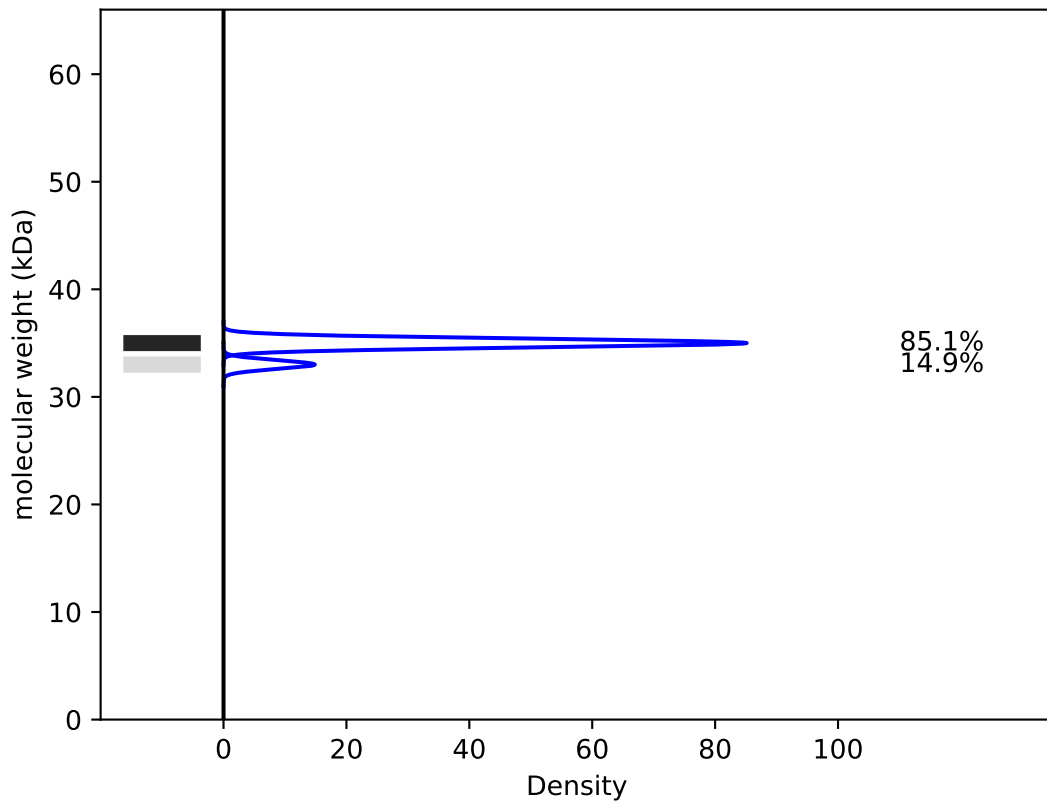



# Q15560

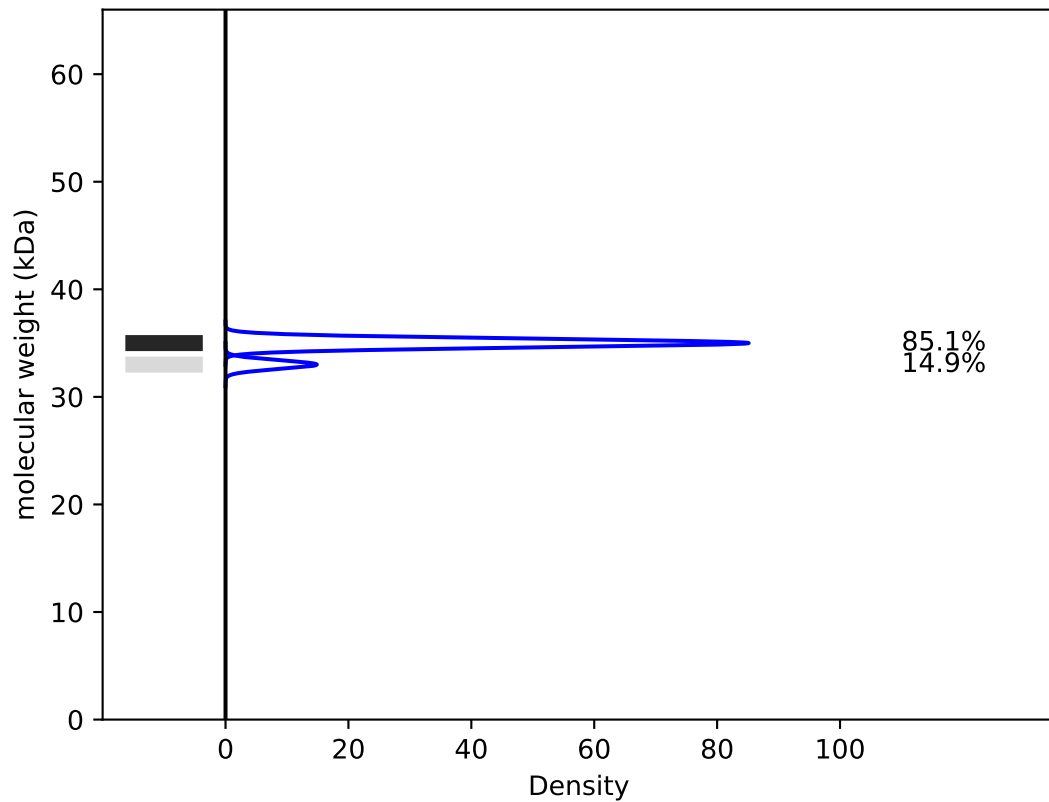

# P23381

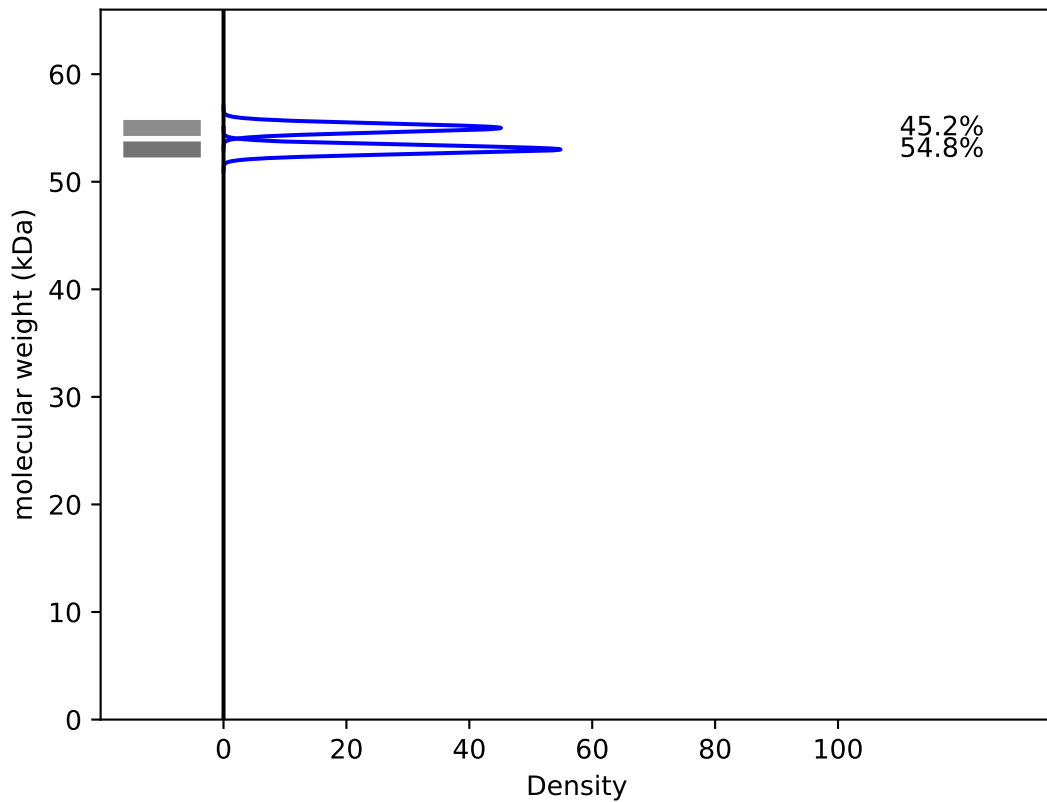

P23396

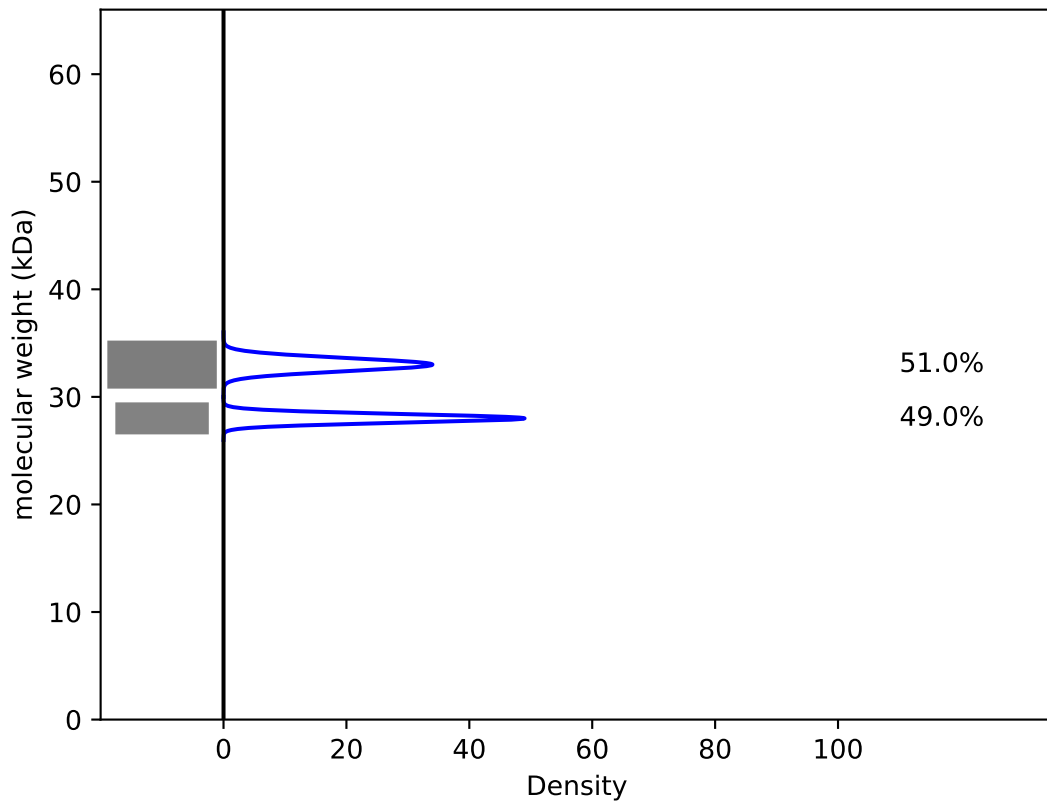

P23526

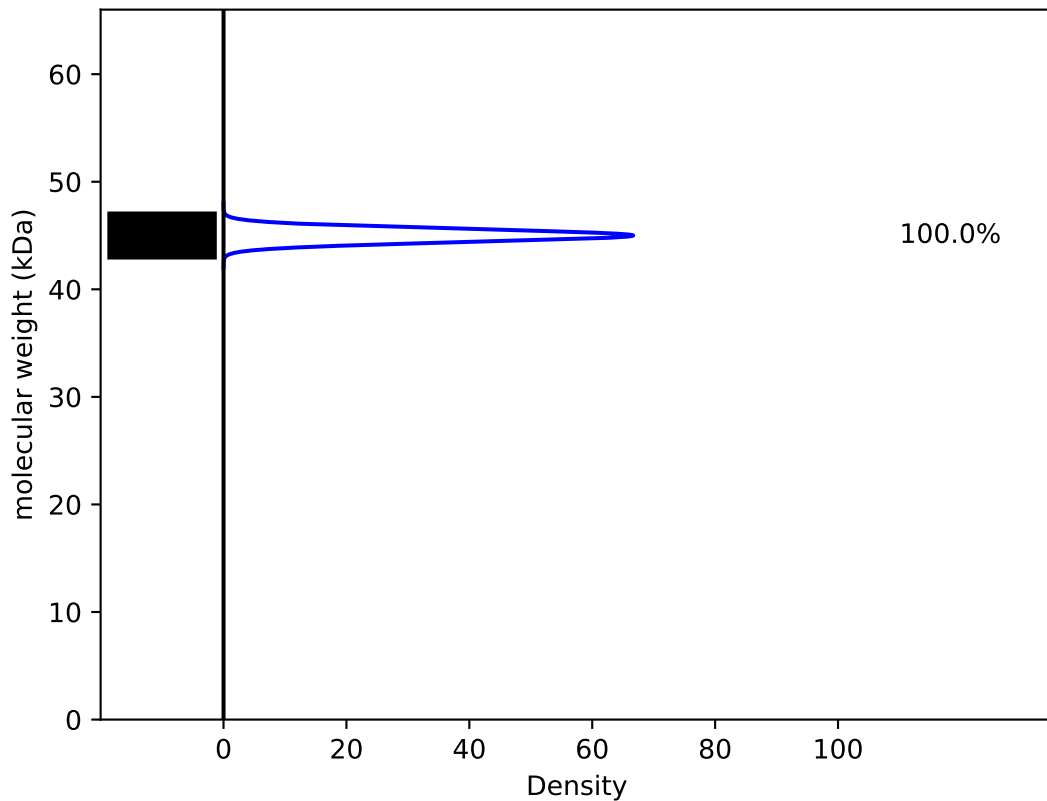

# P23528

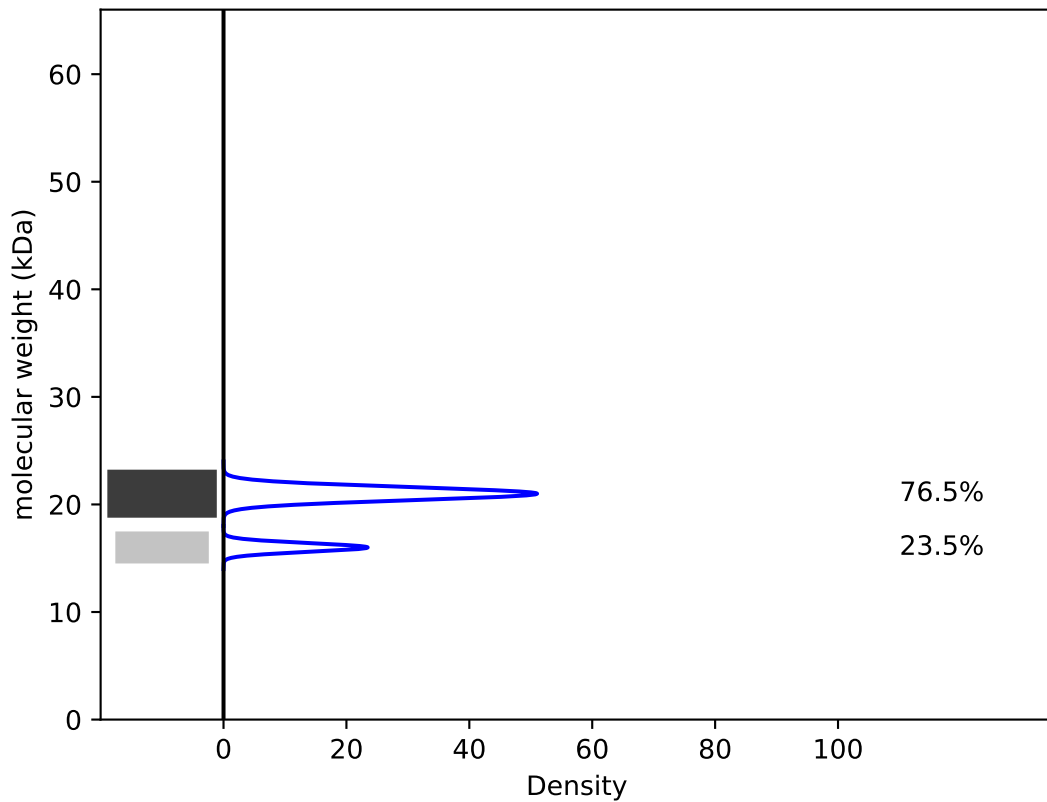

# P23919



P24534



P24752





P24863



P24941

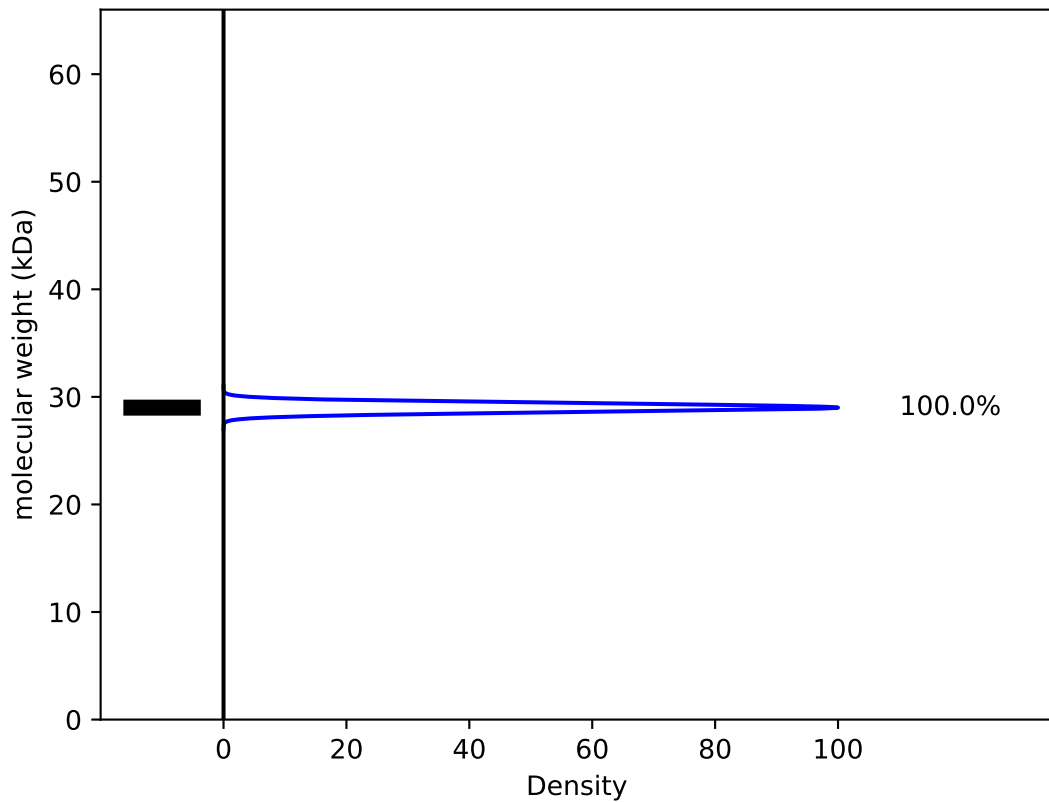

# P25398



# P25685

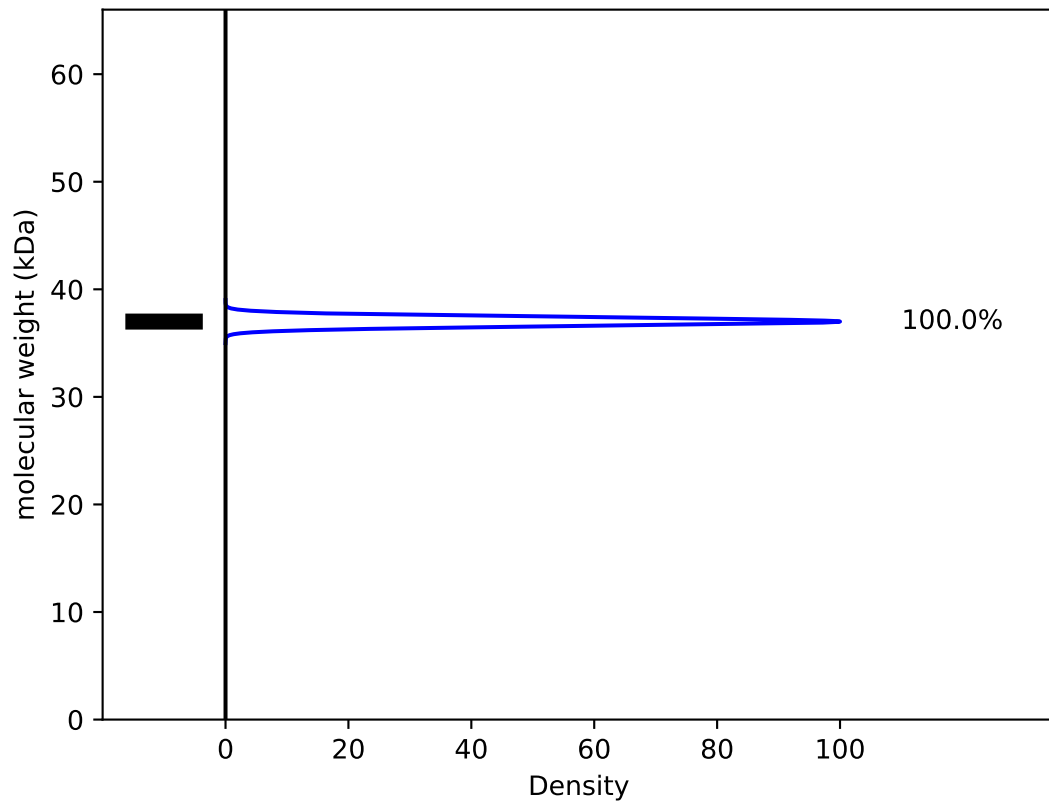

P25786



# P25787

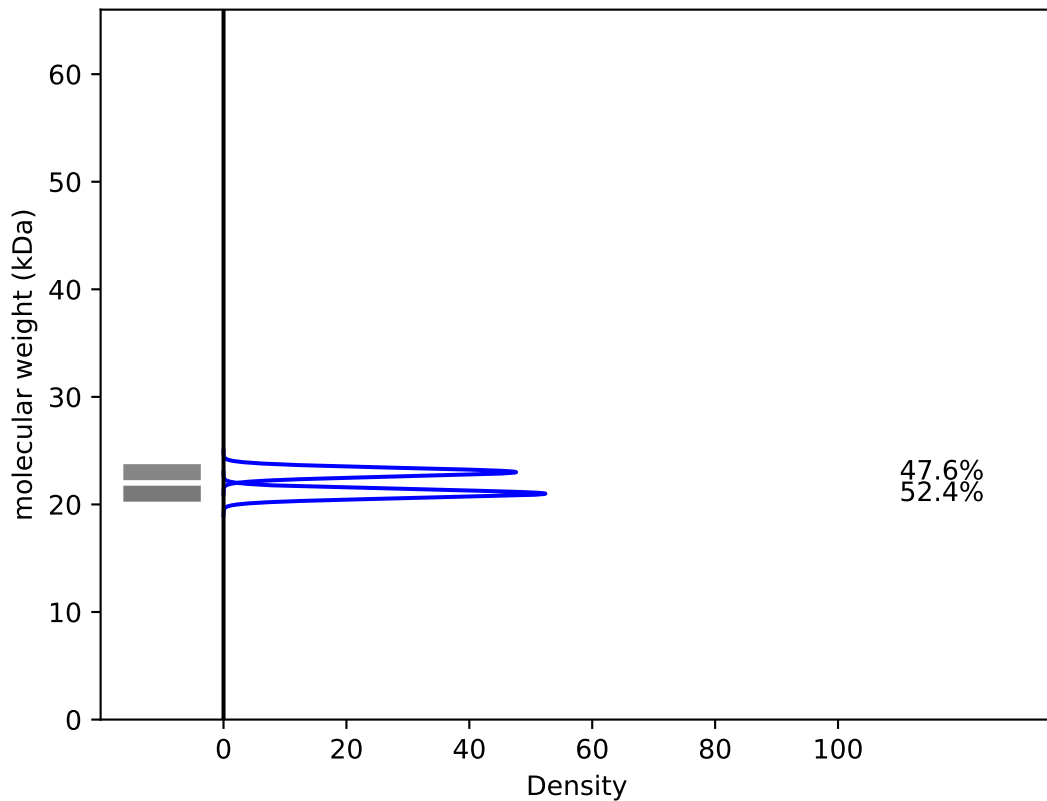

# P25788



# P25789

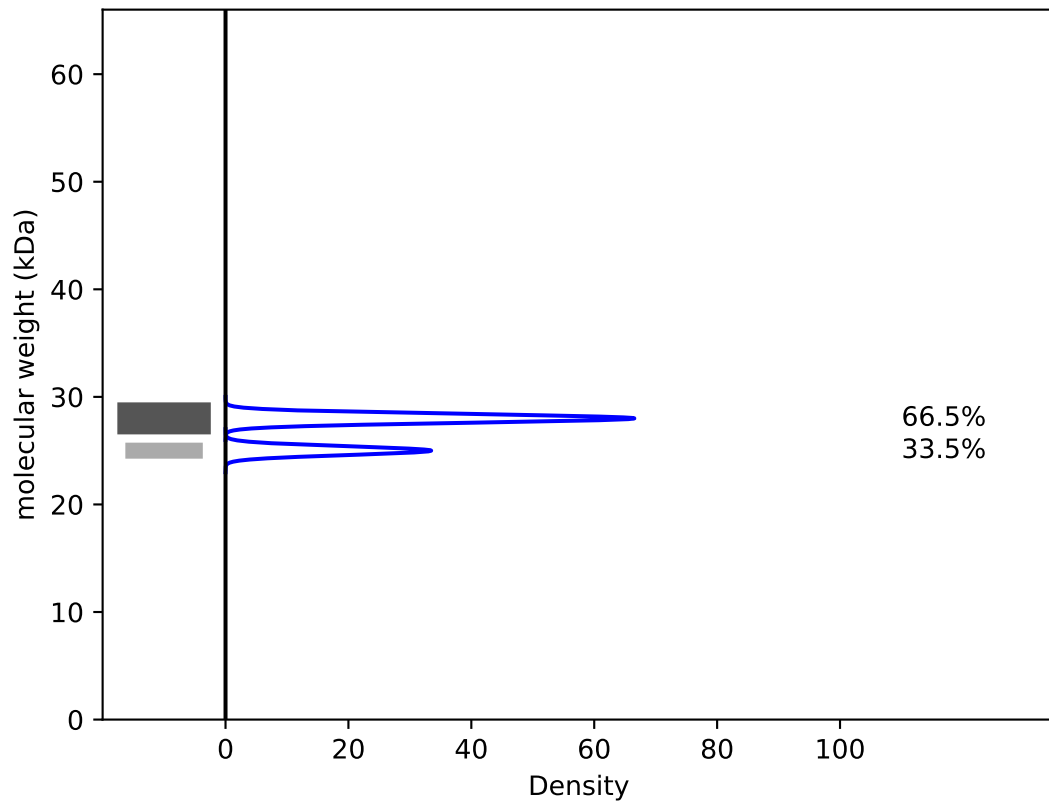



# P26196



P26368



P26373

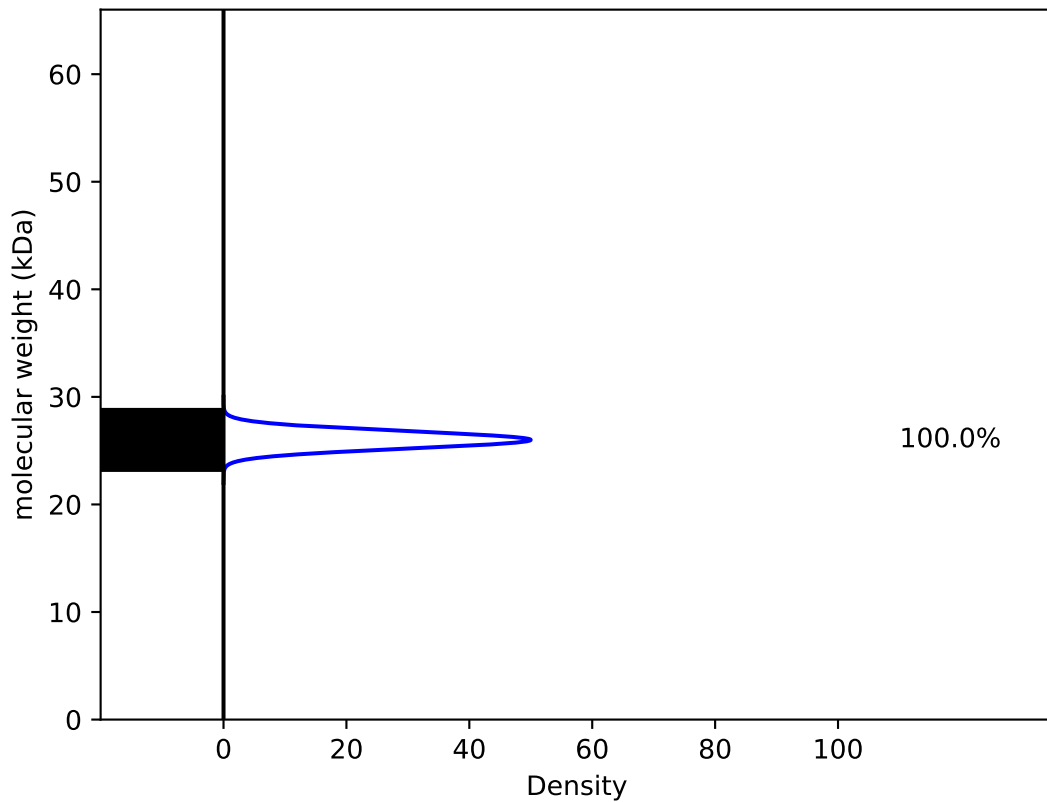

P26583



P26599



O95758



# P26641

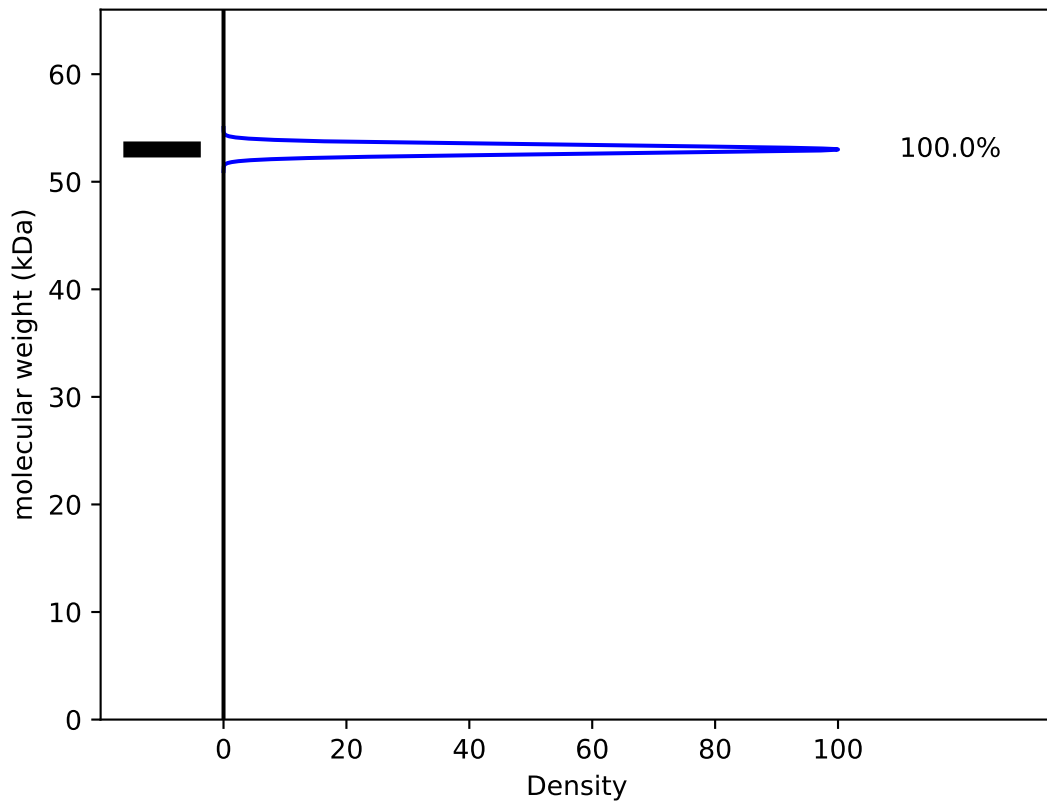

P27105

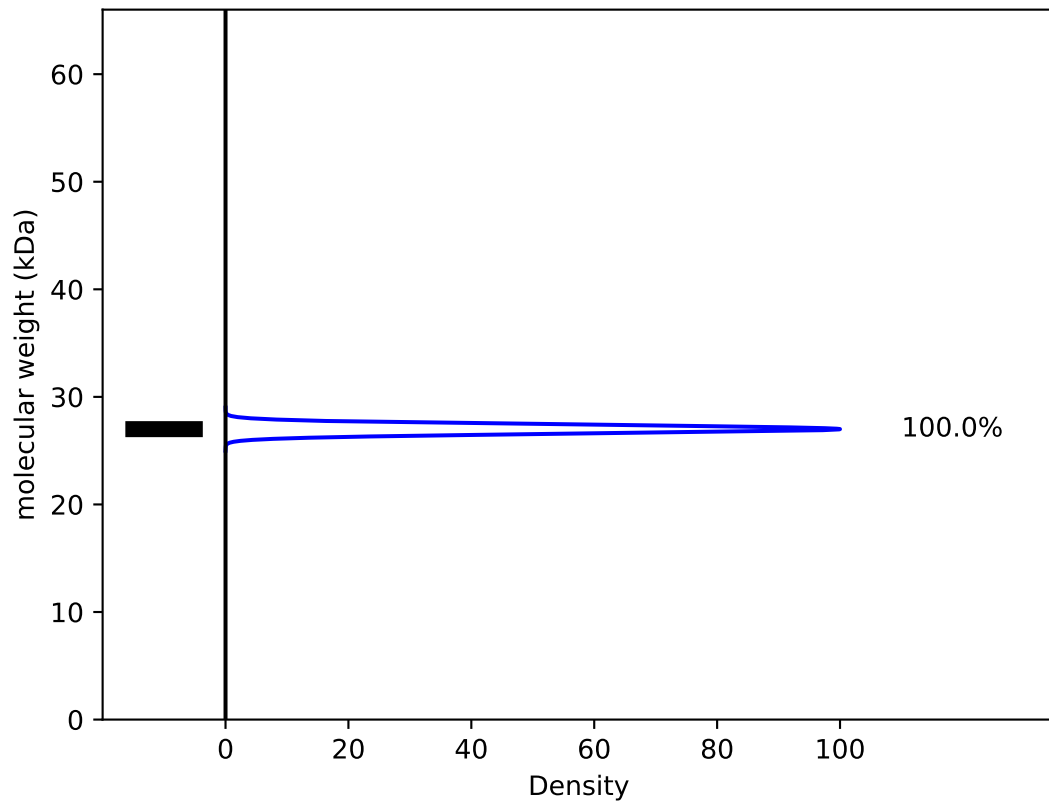



P27348



P27635

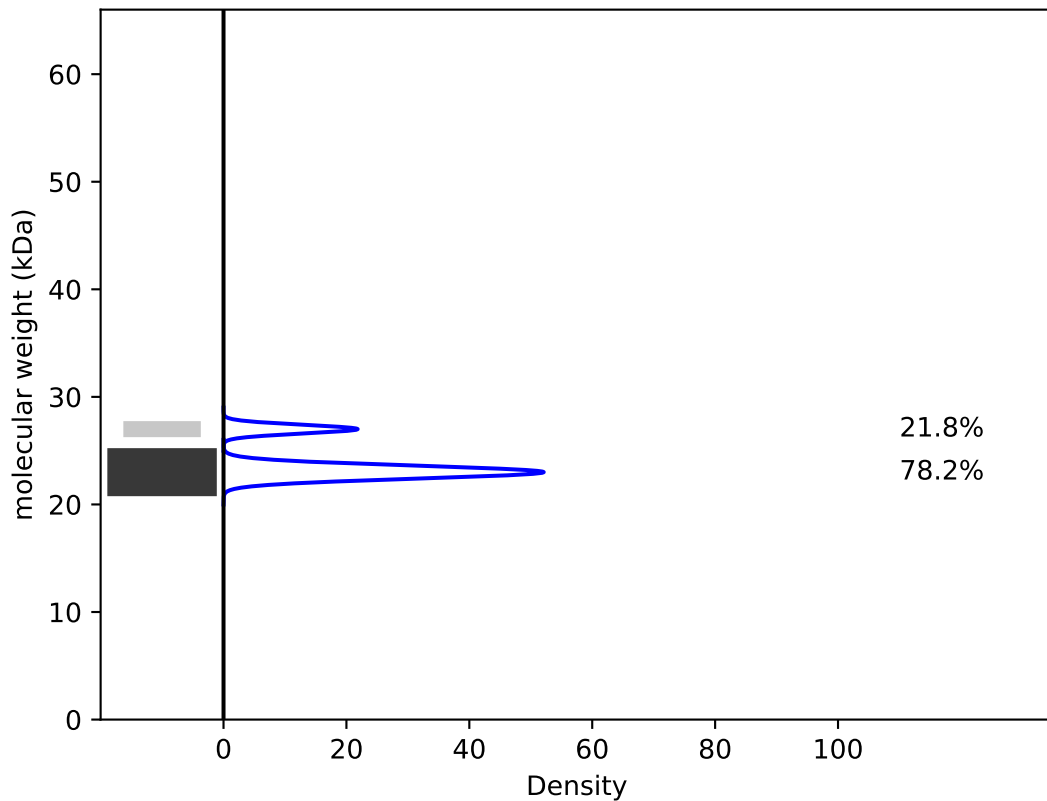

# Q96L21



# P27695

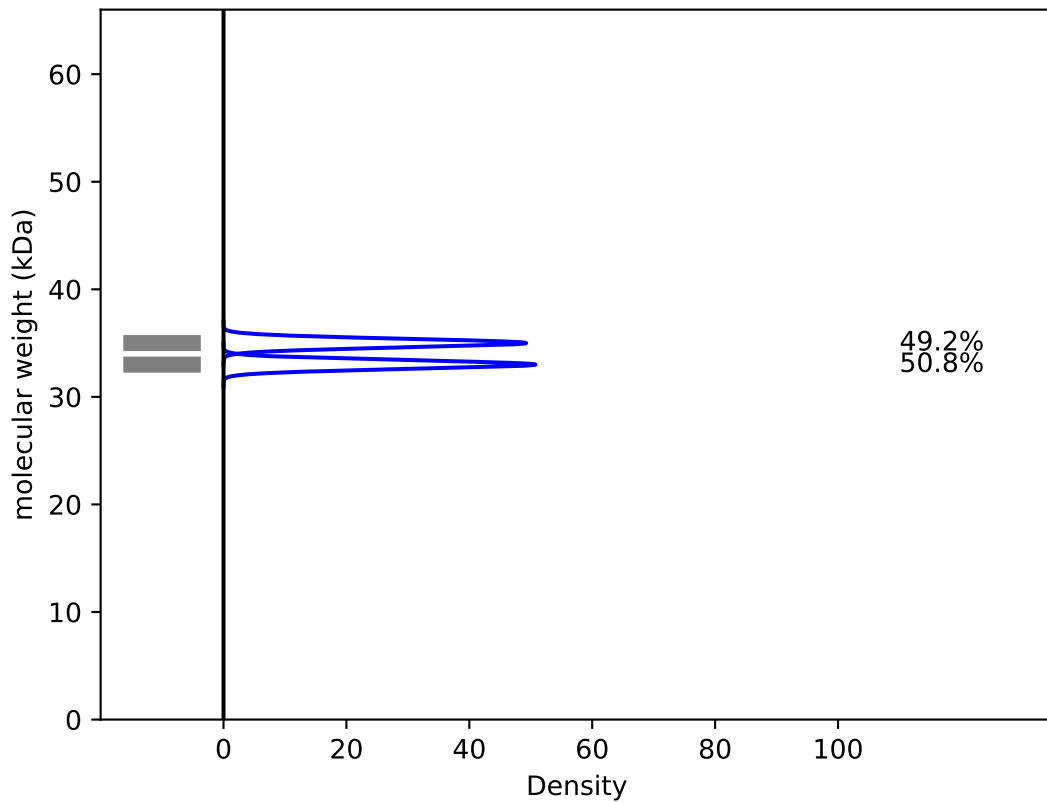

P27797



# P28065

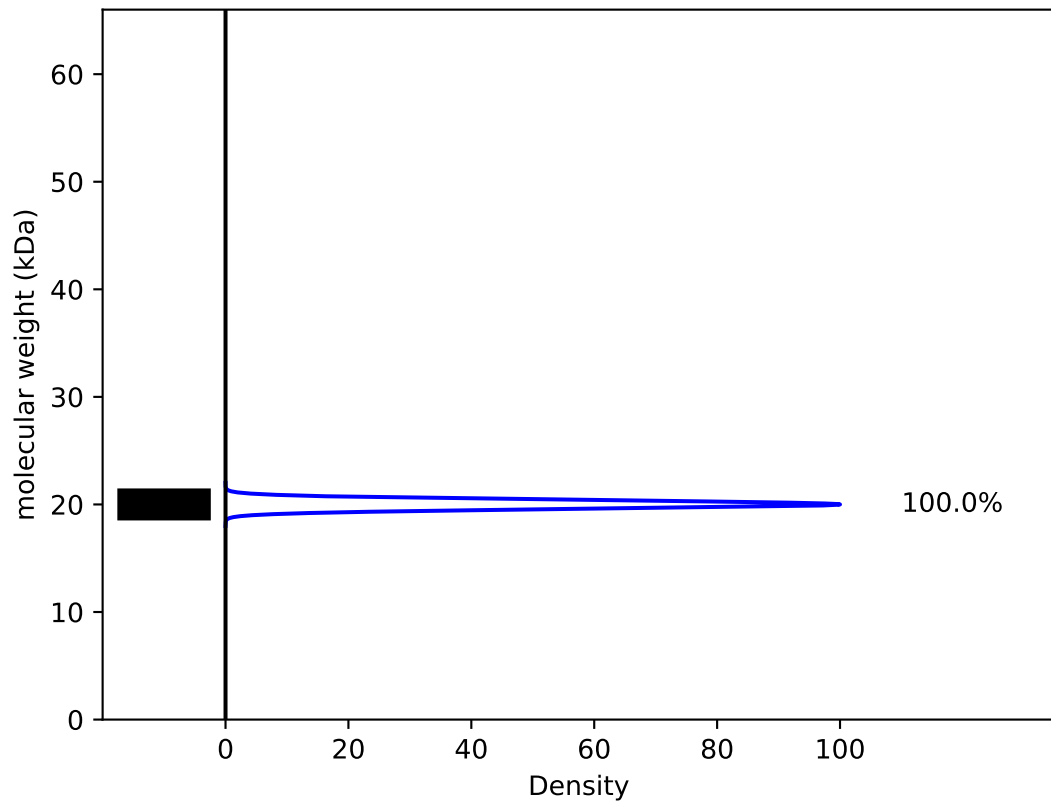

# P28066

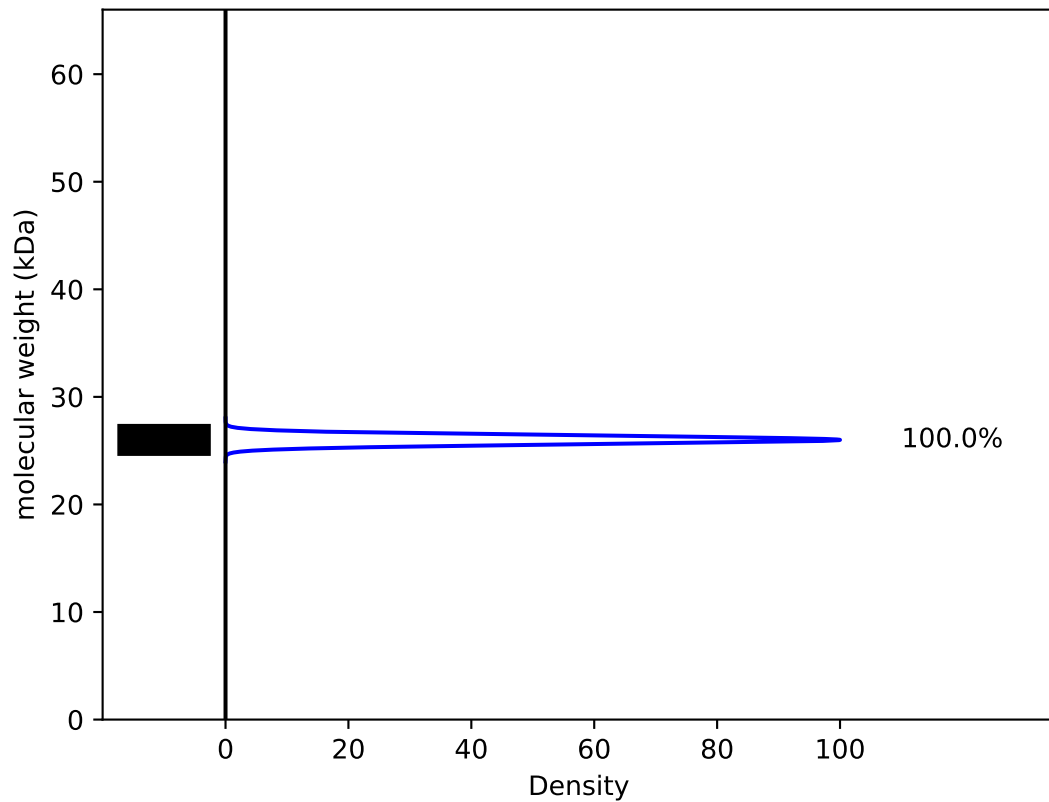

P28072





# P28482

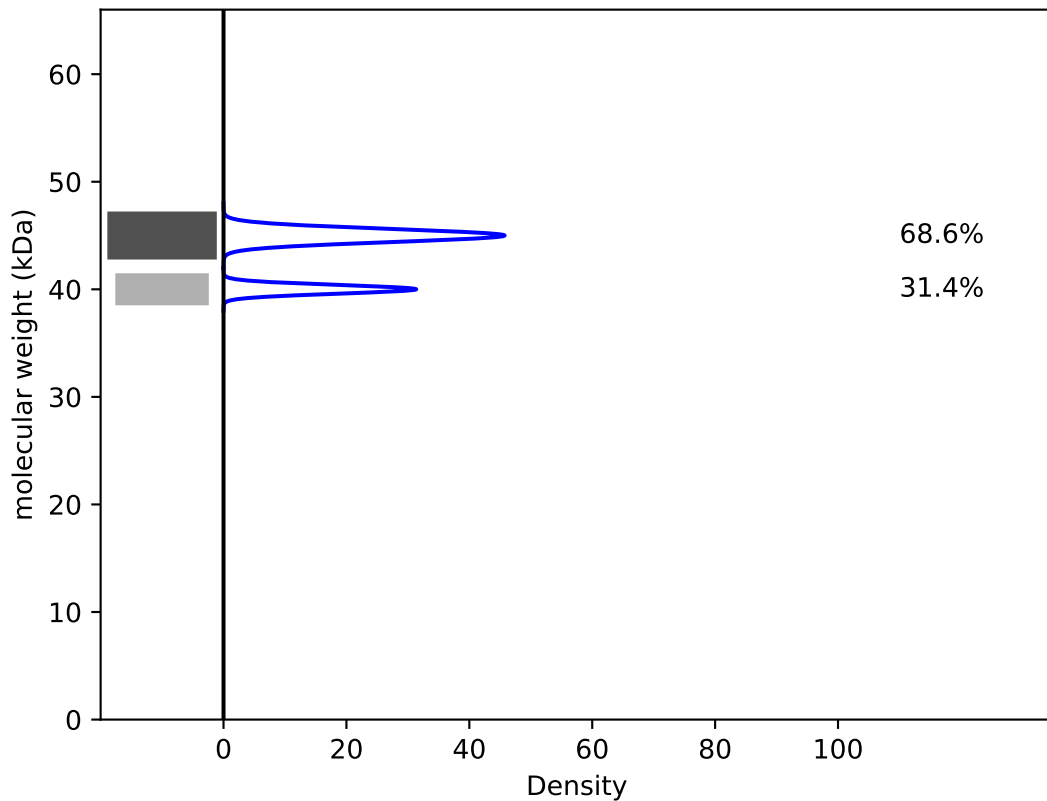

# P27361

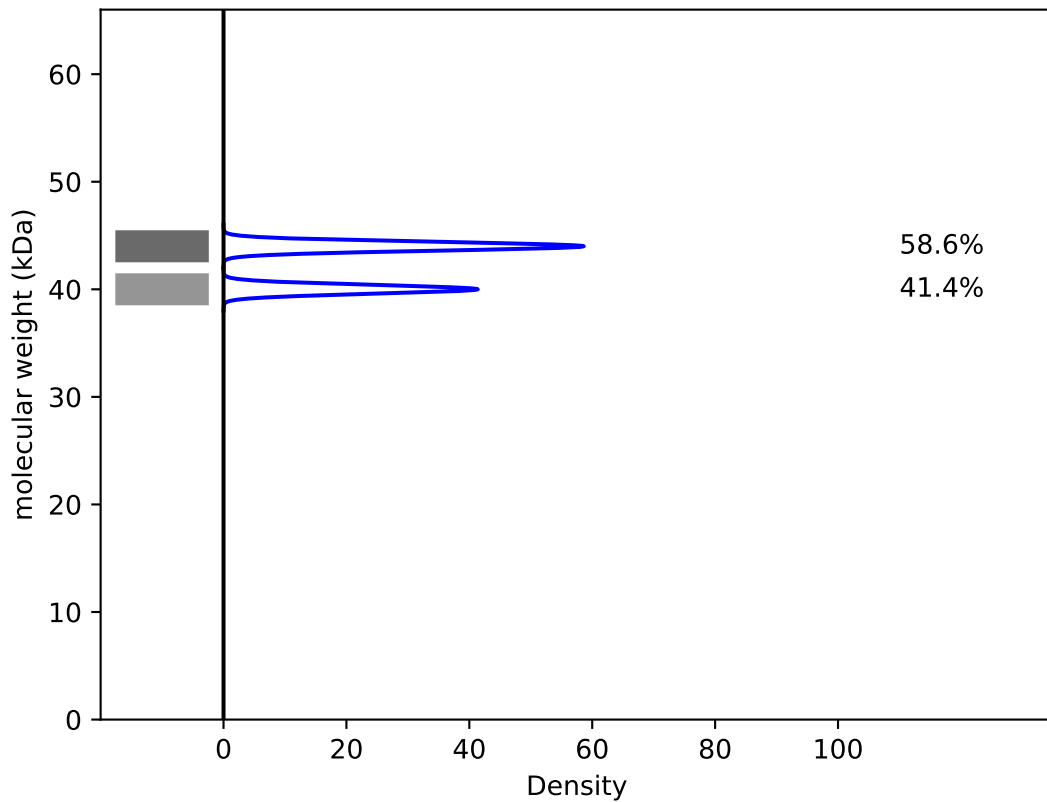

P28838

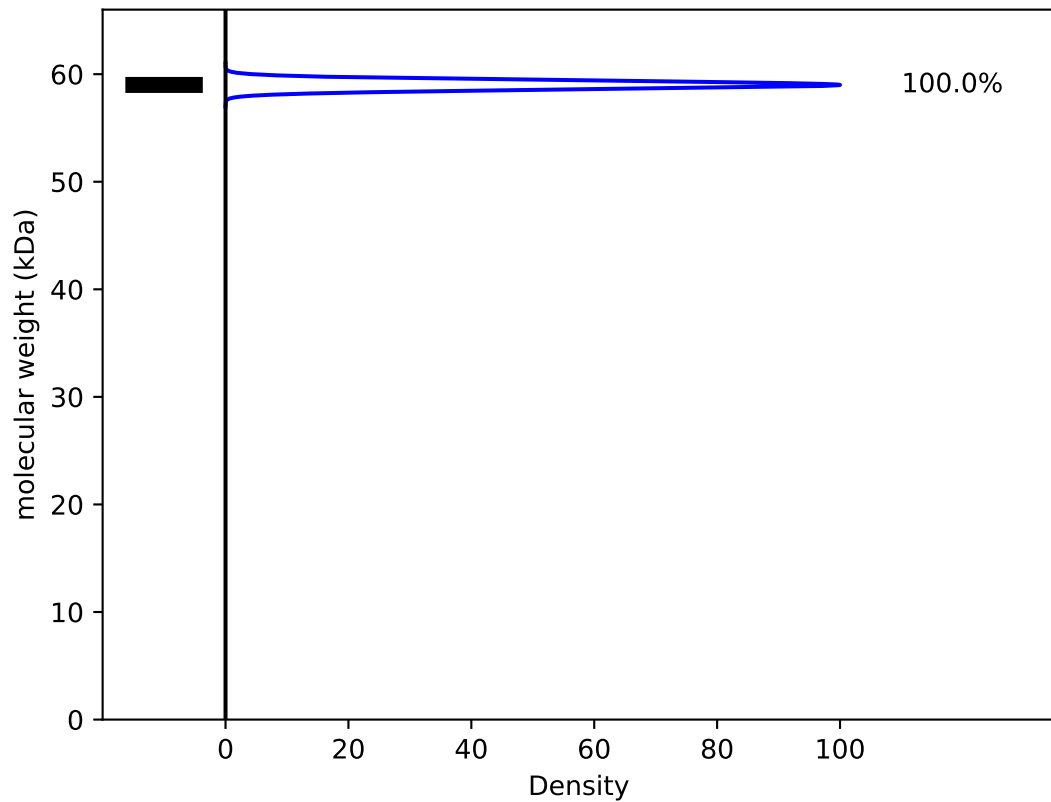

# P29218



P29692



# P29992

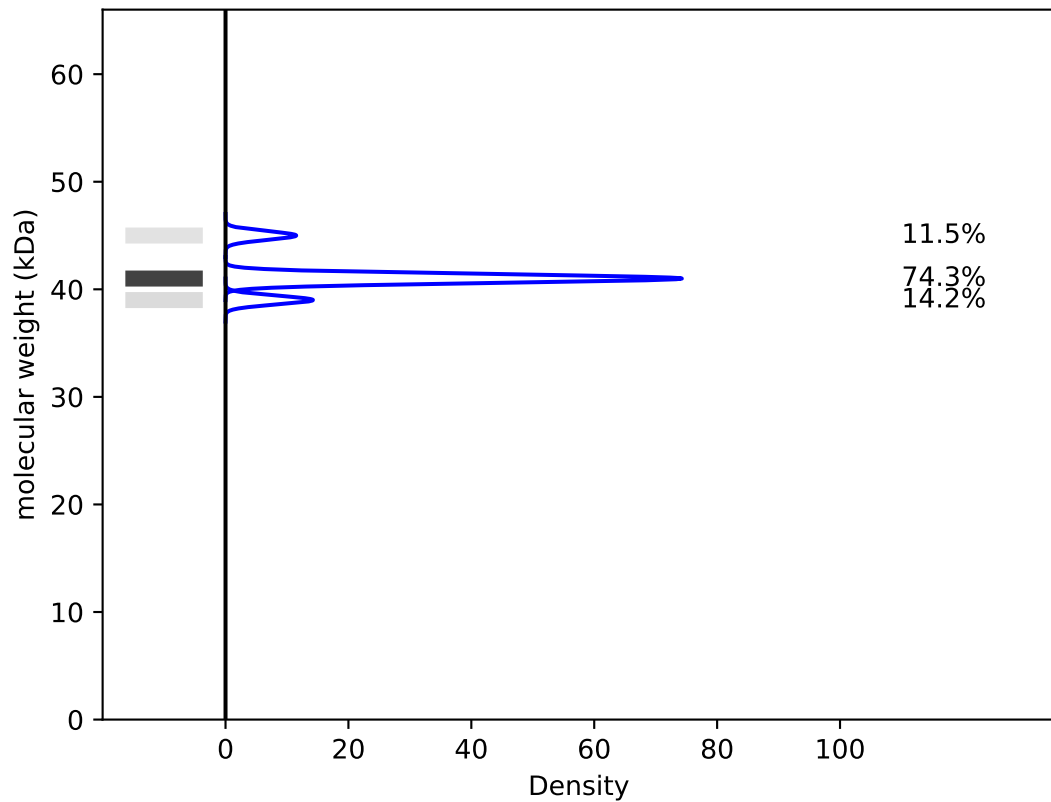

O95837



# P50148

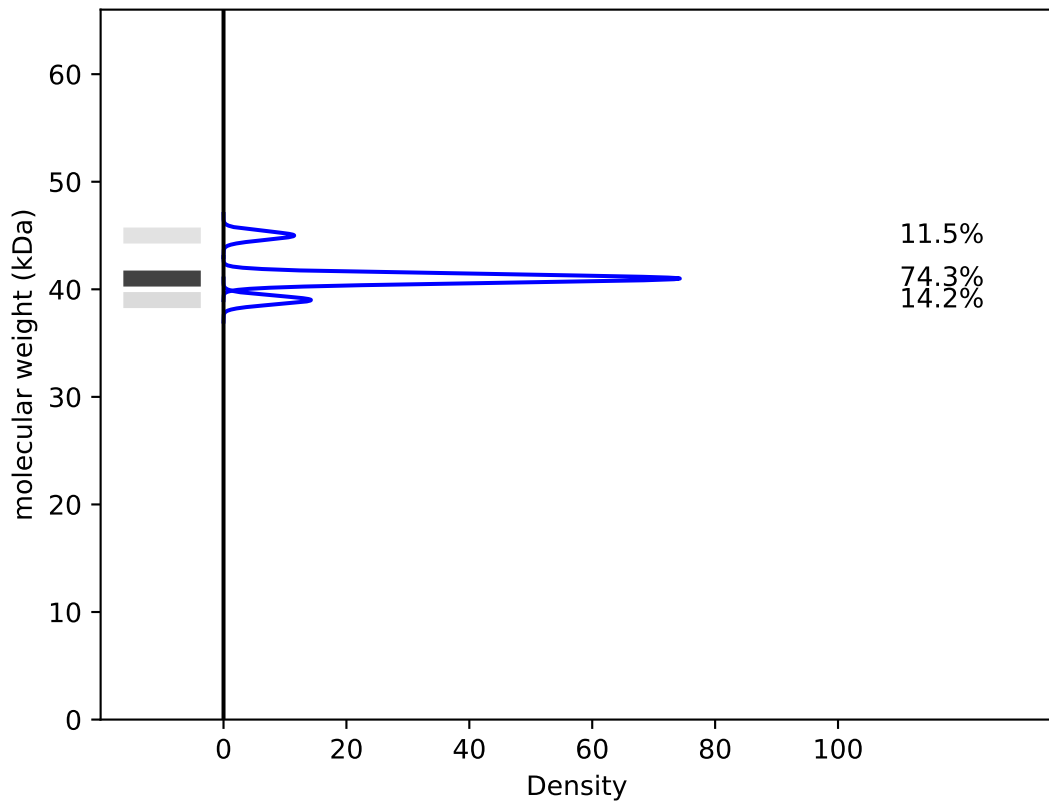



# P30040



P30041

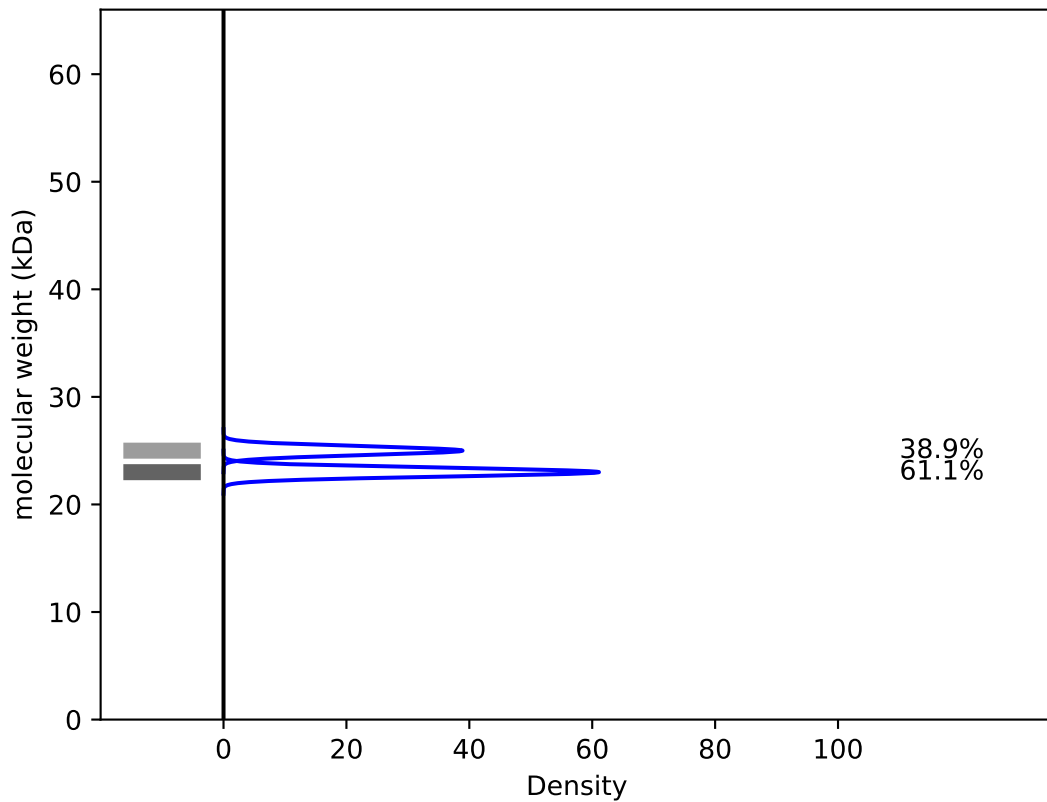

P30043

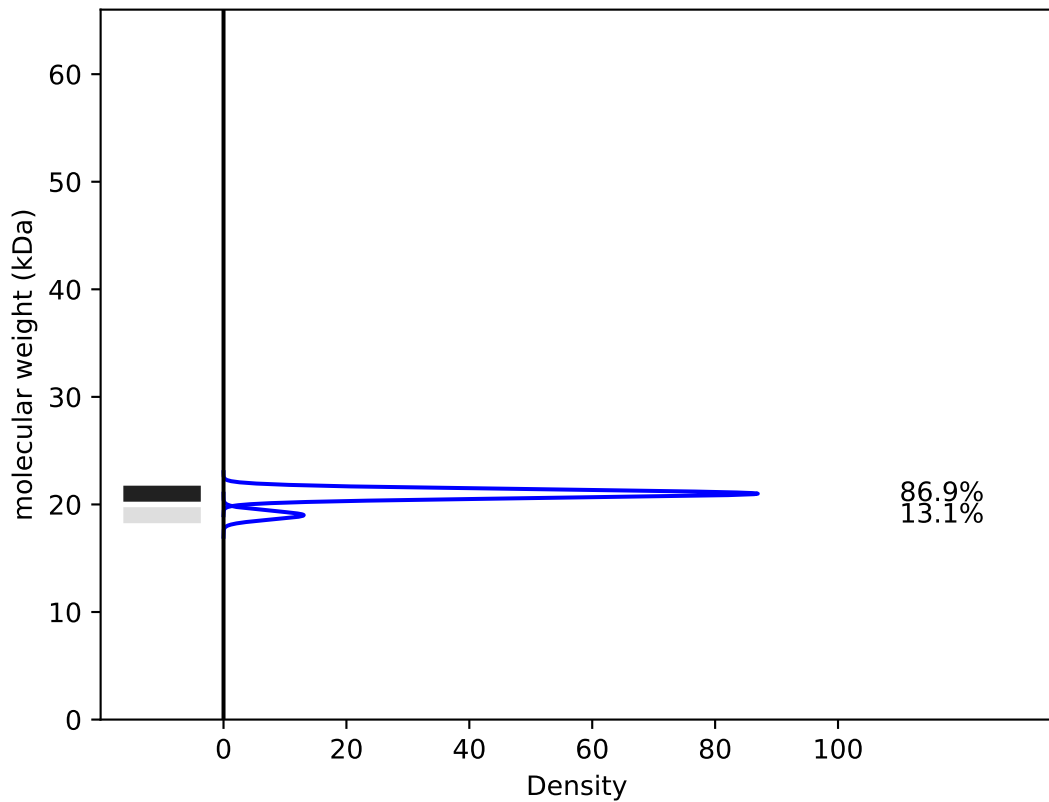

P30048



# P30050



P30084

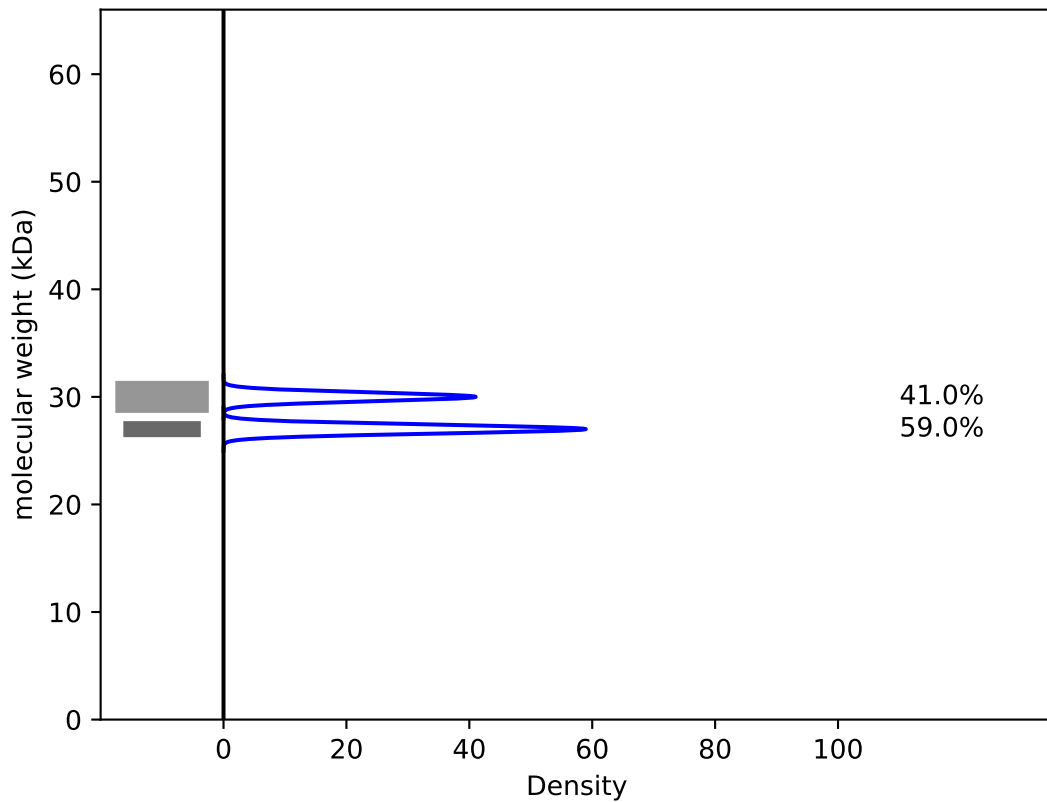

# P30085

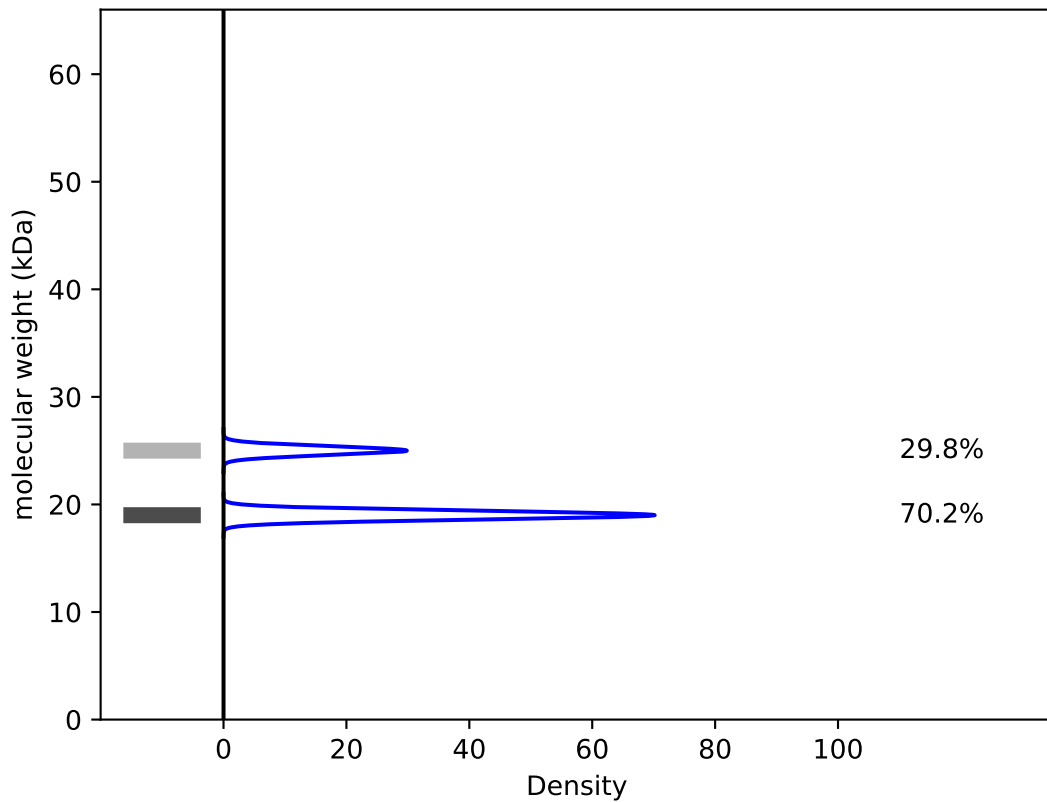

# P30086

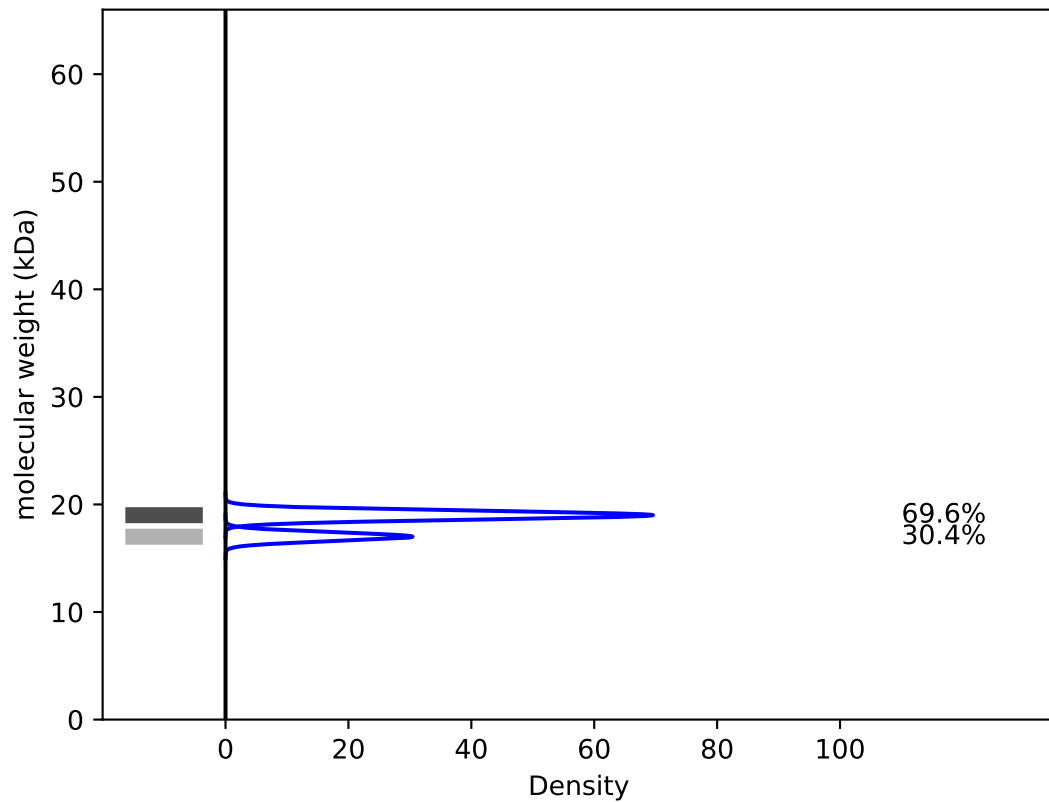



P30101



# P30419



# O60551



# P30453

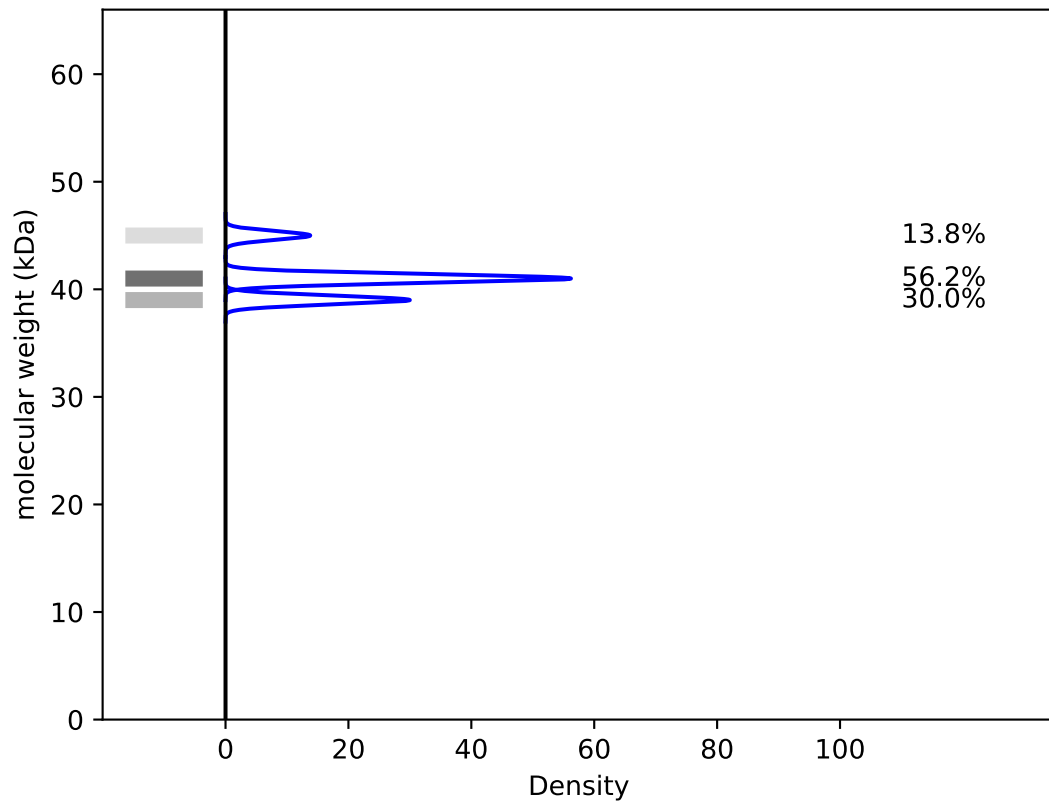

# P30457



# P30450

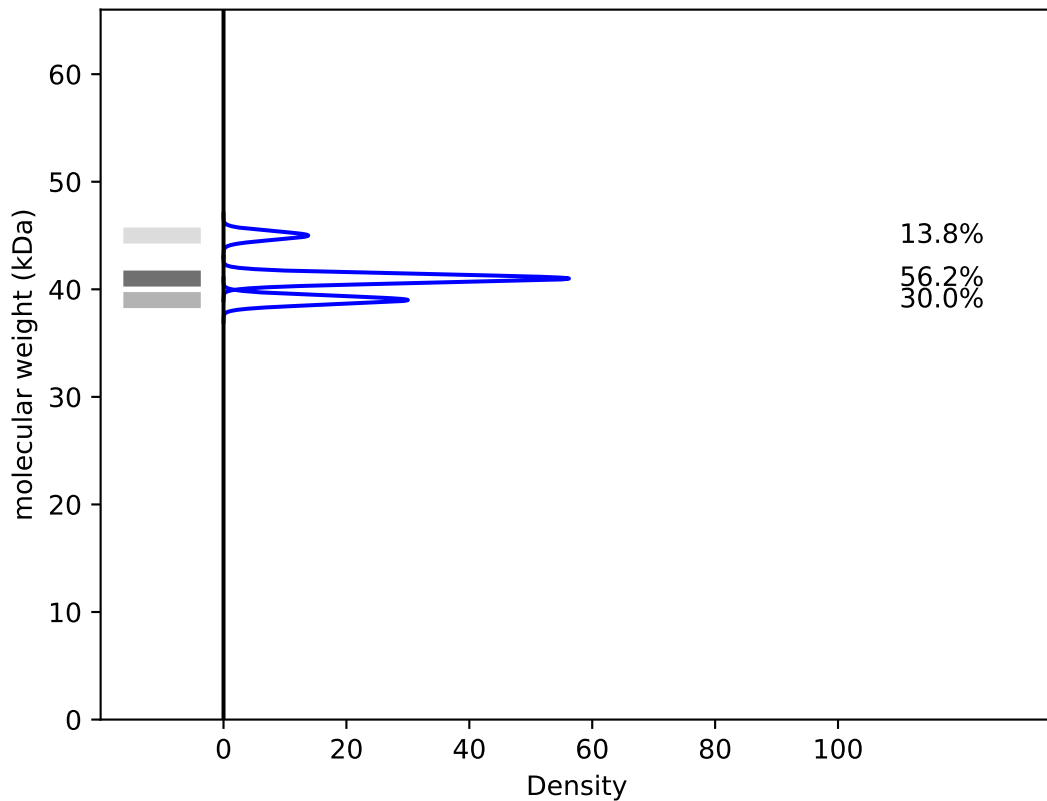

# P18462



# P30456





# Q29940

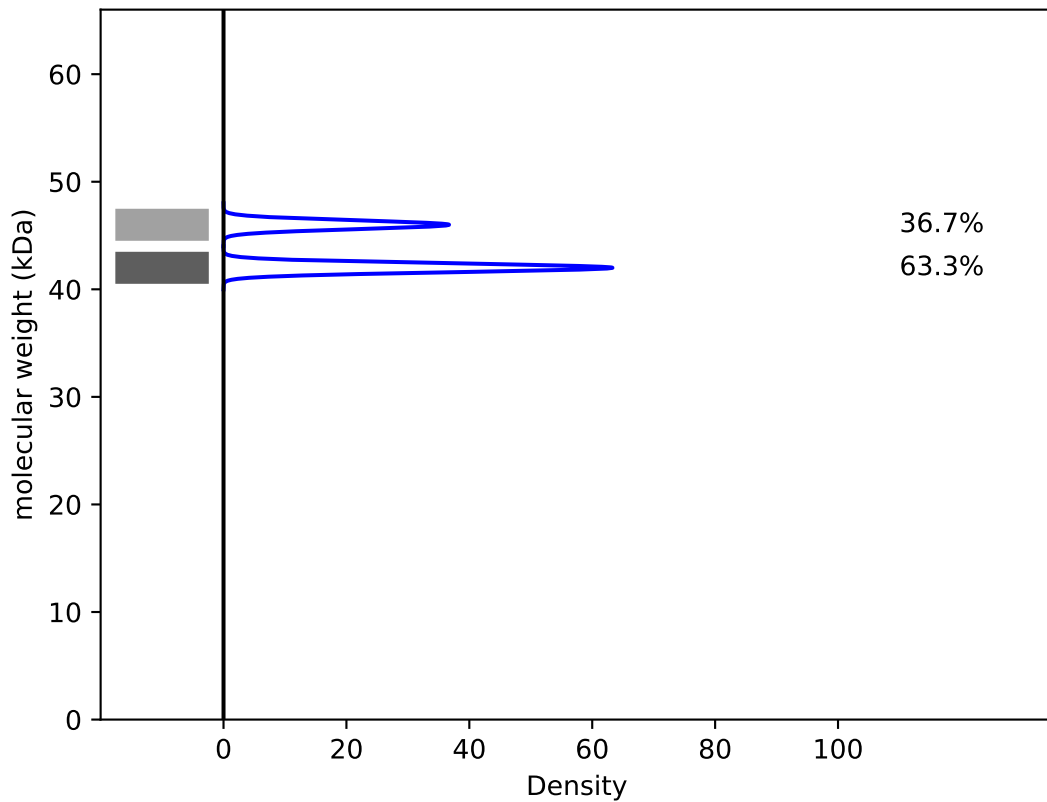

# P30493

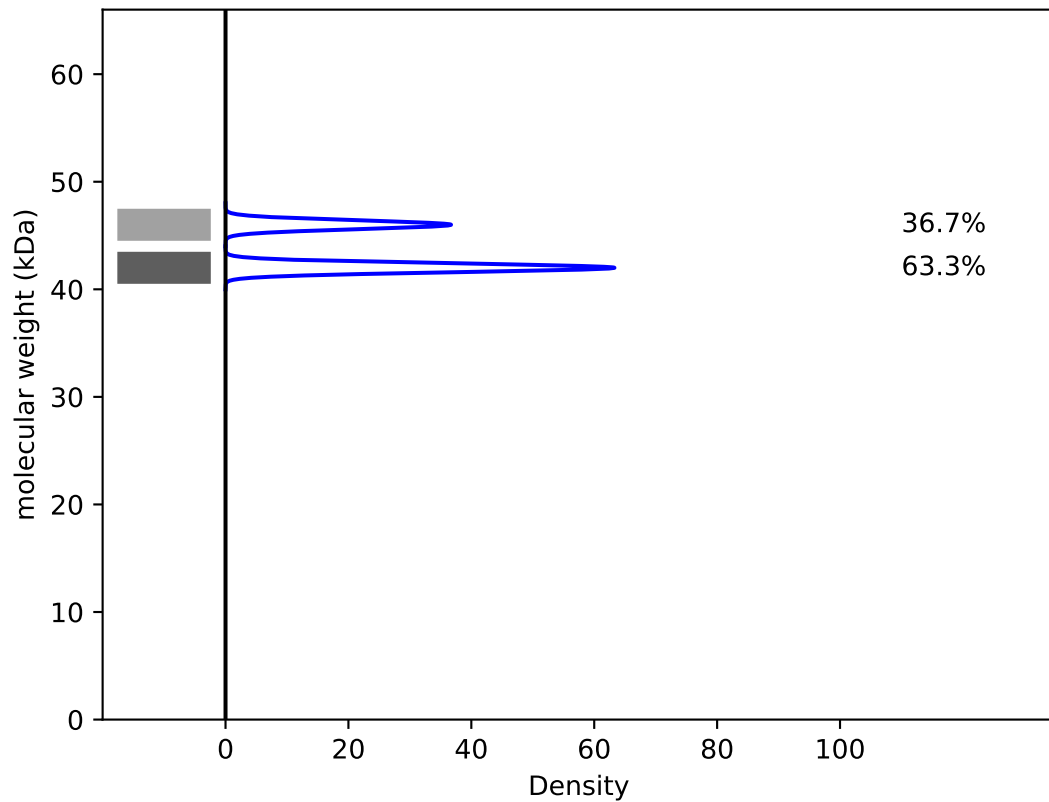

# P30492



# P30508

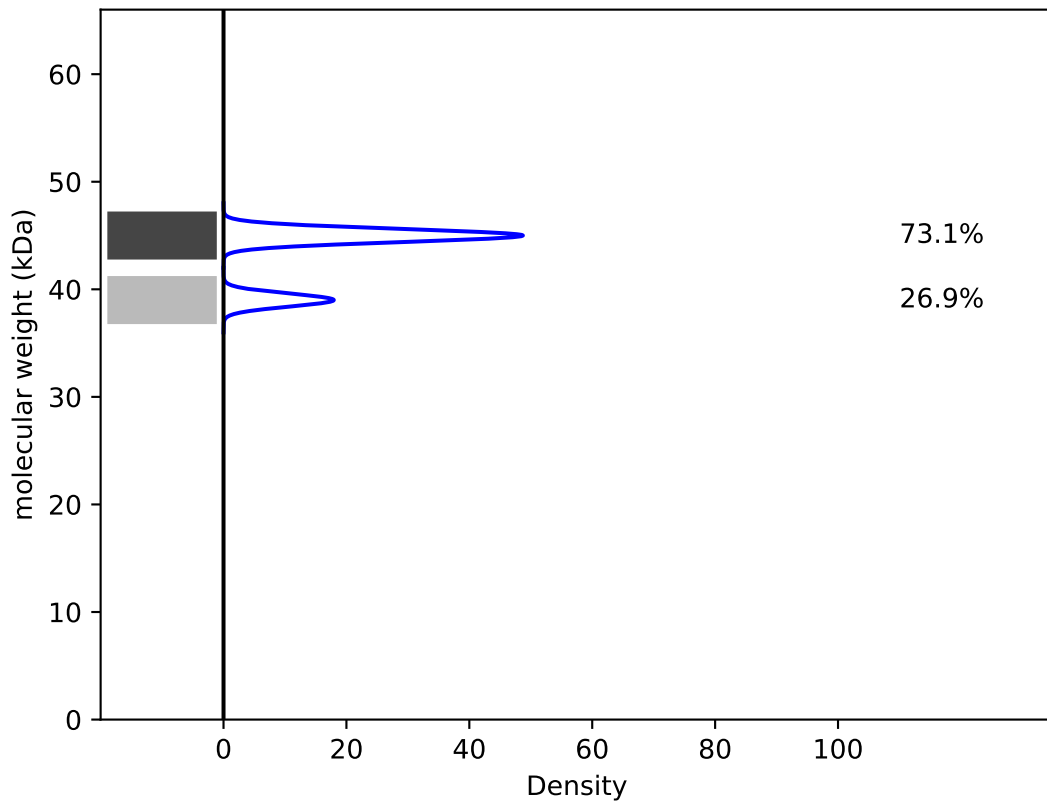

# Q07000



# P30504



# Q29960

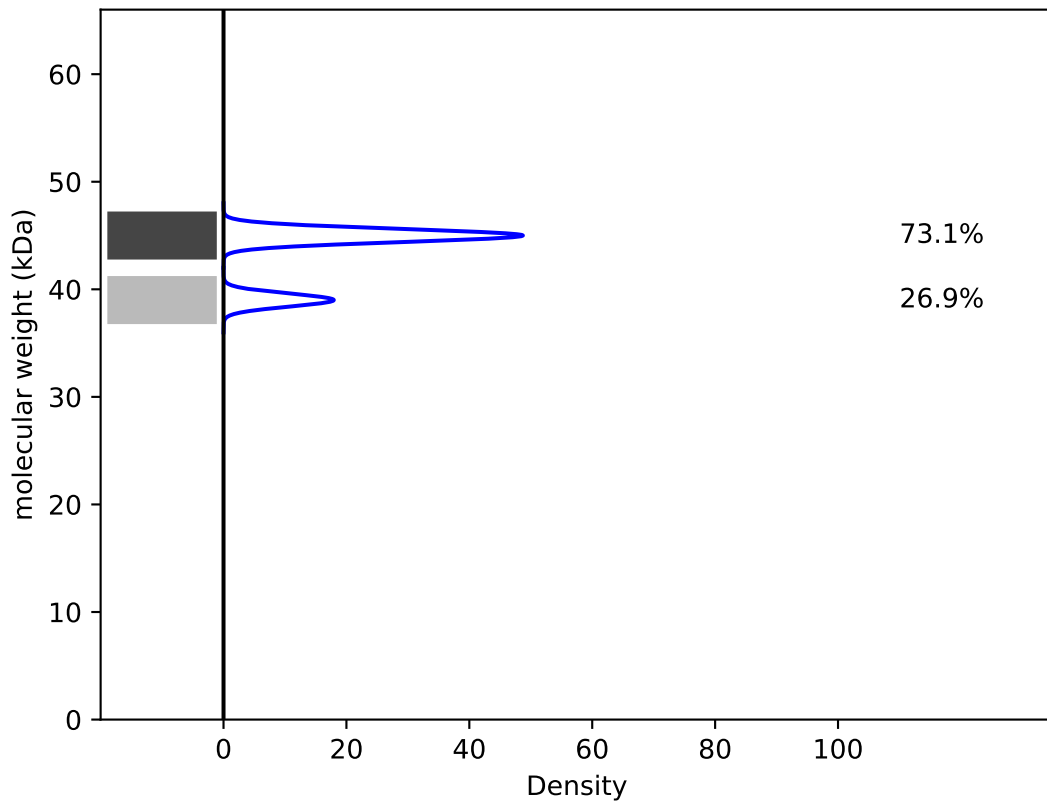

# P30505





# Q9TNN7



# Q95604



# P30519

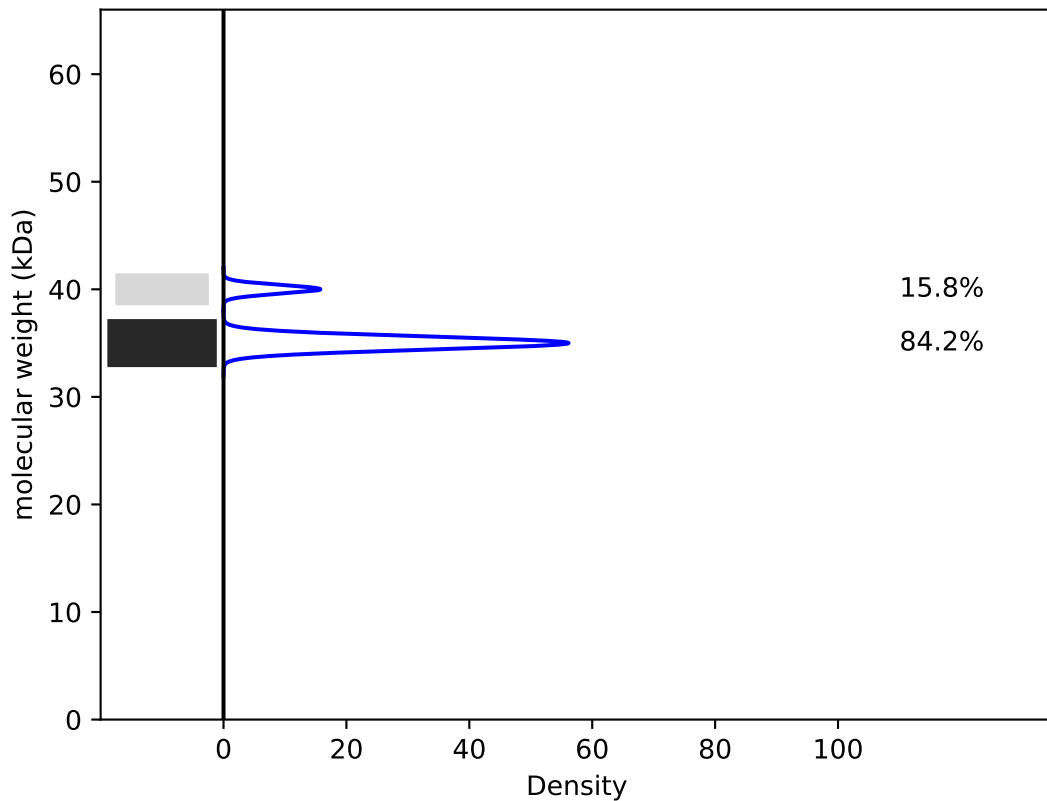

P30533

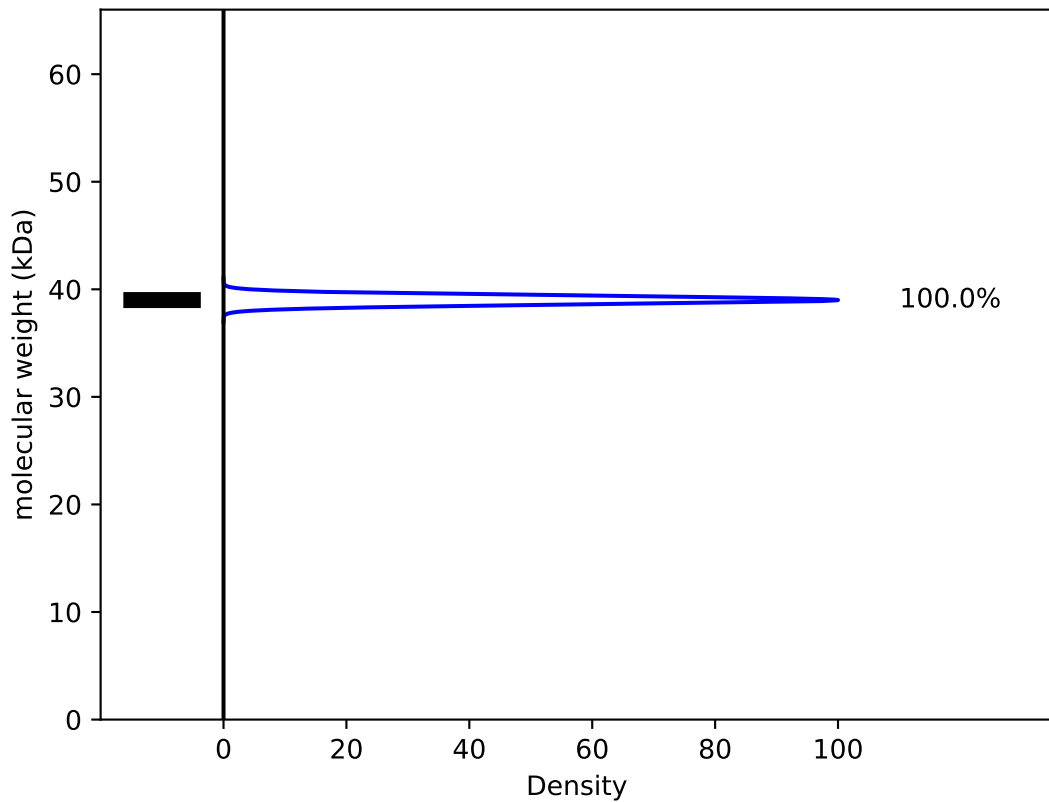

# P30566



P30626



# P30740

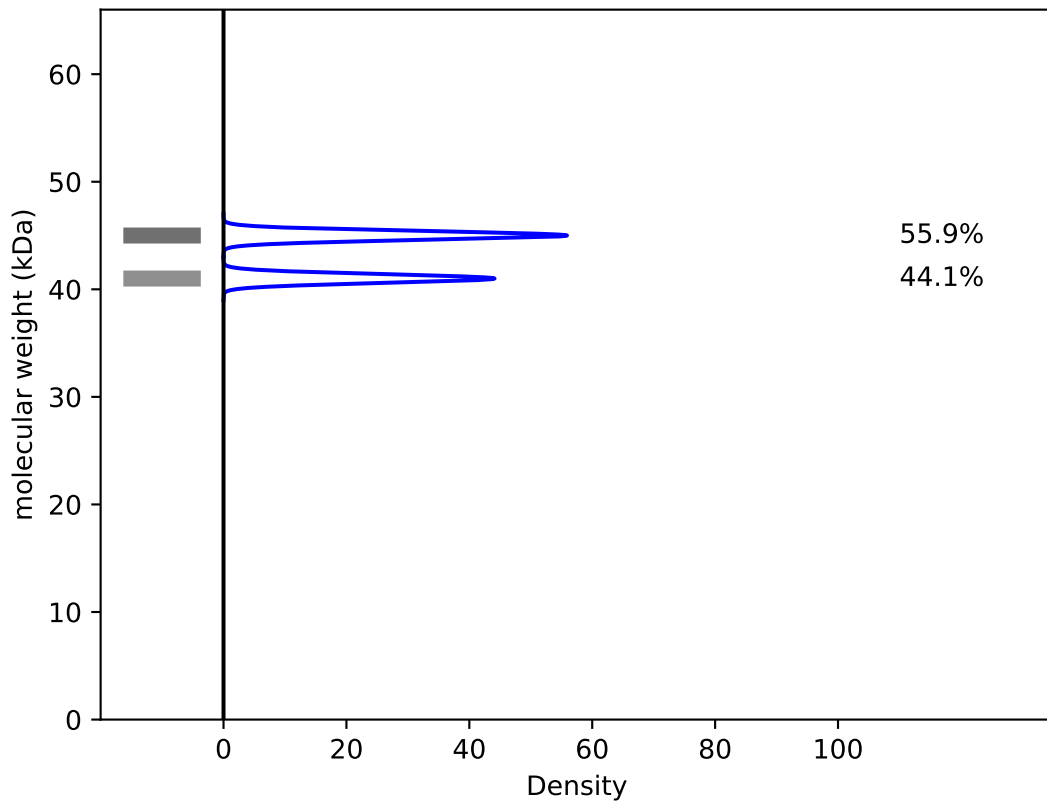

# P50453





P30837



# P31153



Q00266



# P31350

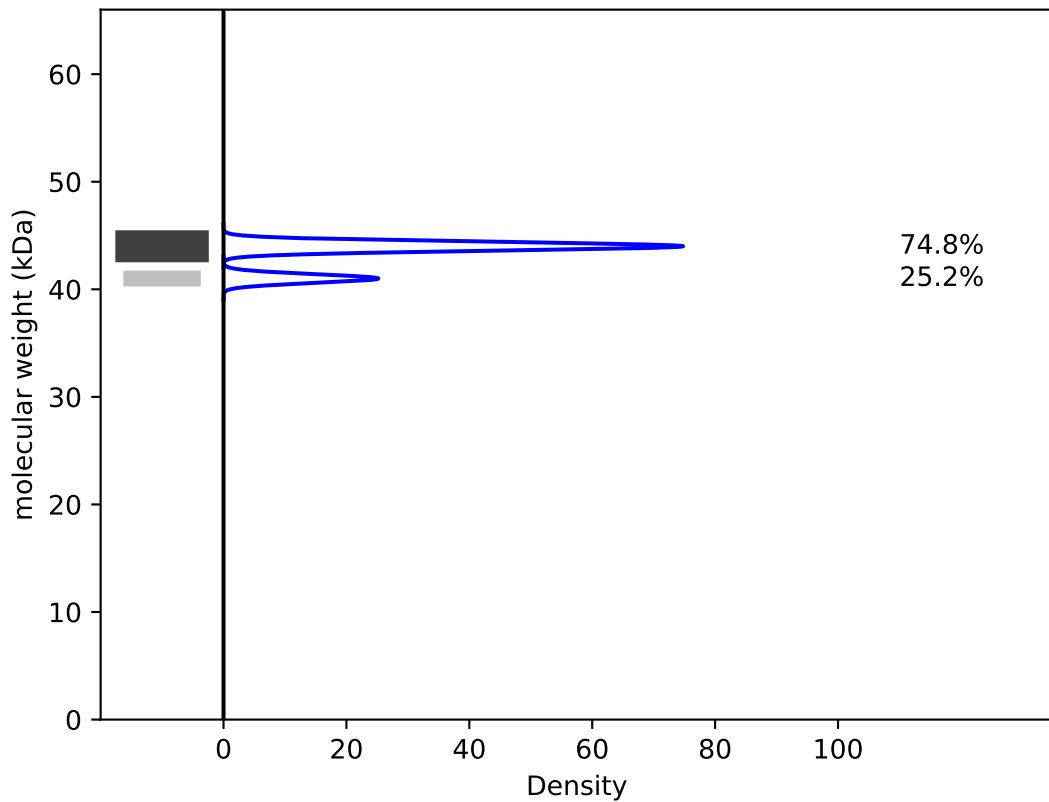

# Q7LG56



# P31689



# P31937

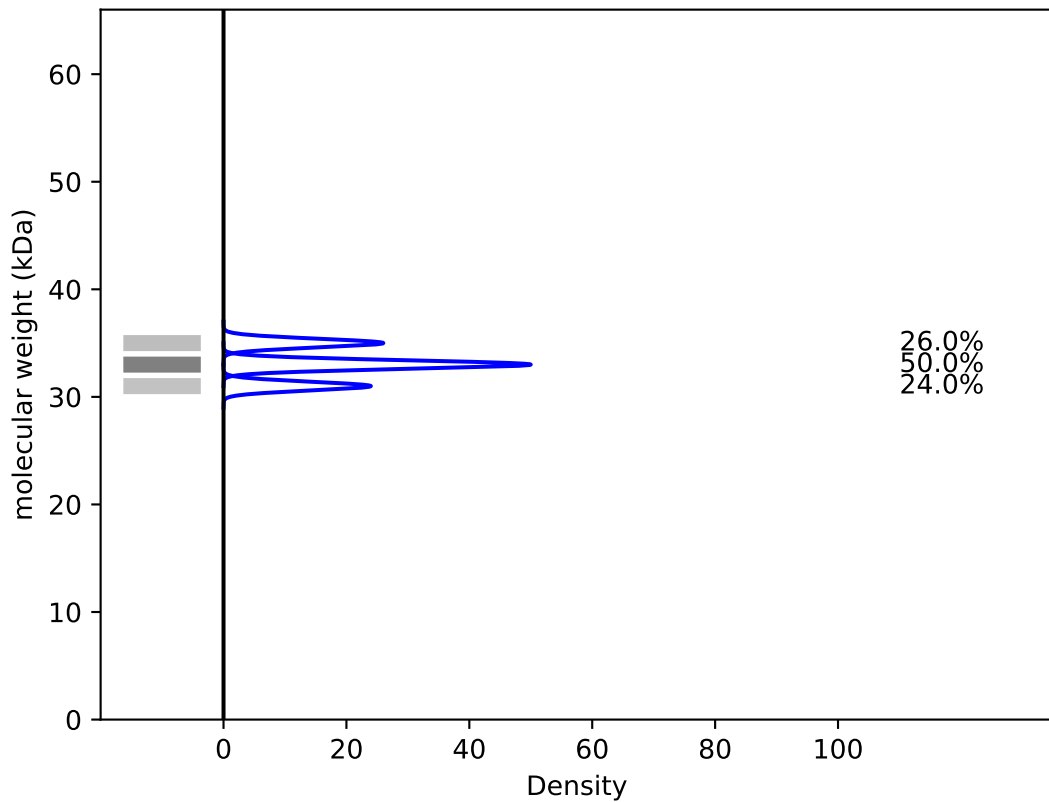

# P31942





# P31943



# P55795



P31946

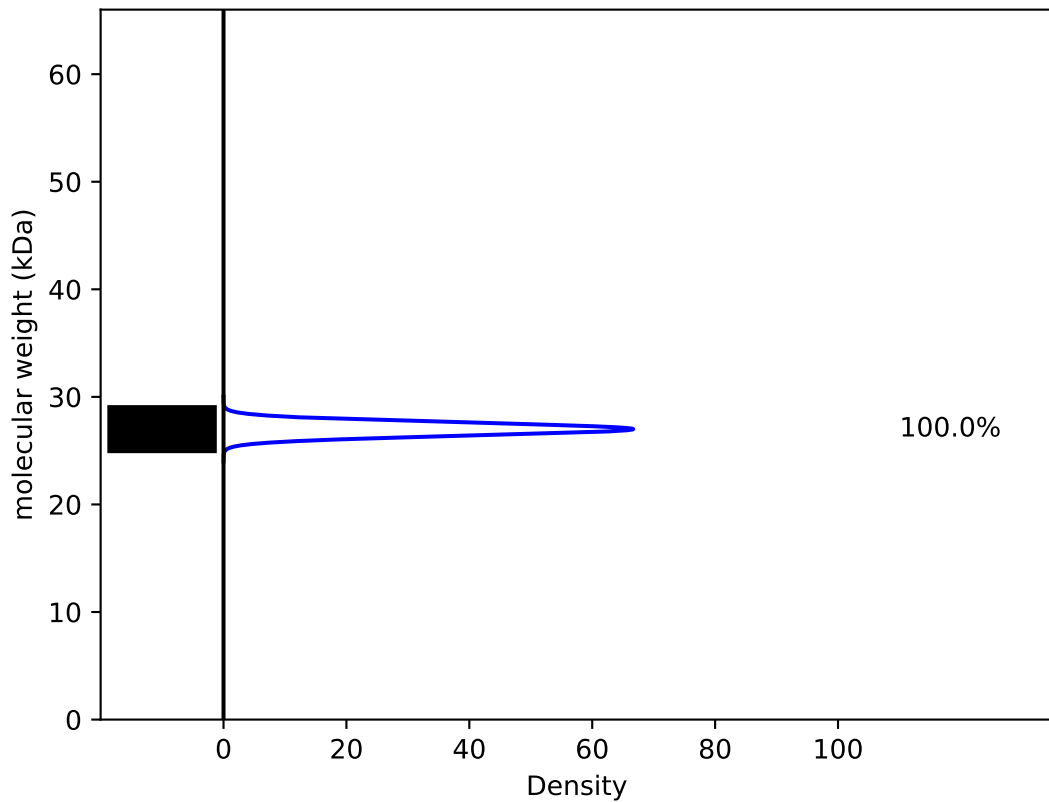

# P31947

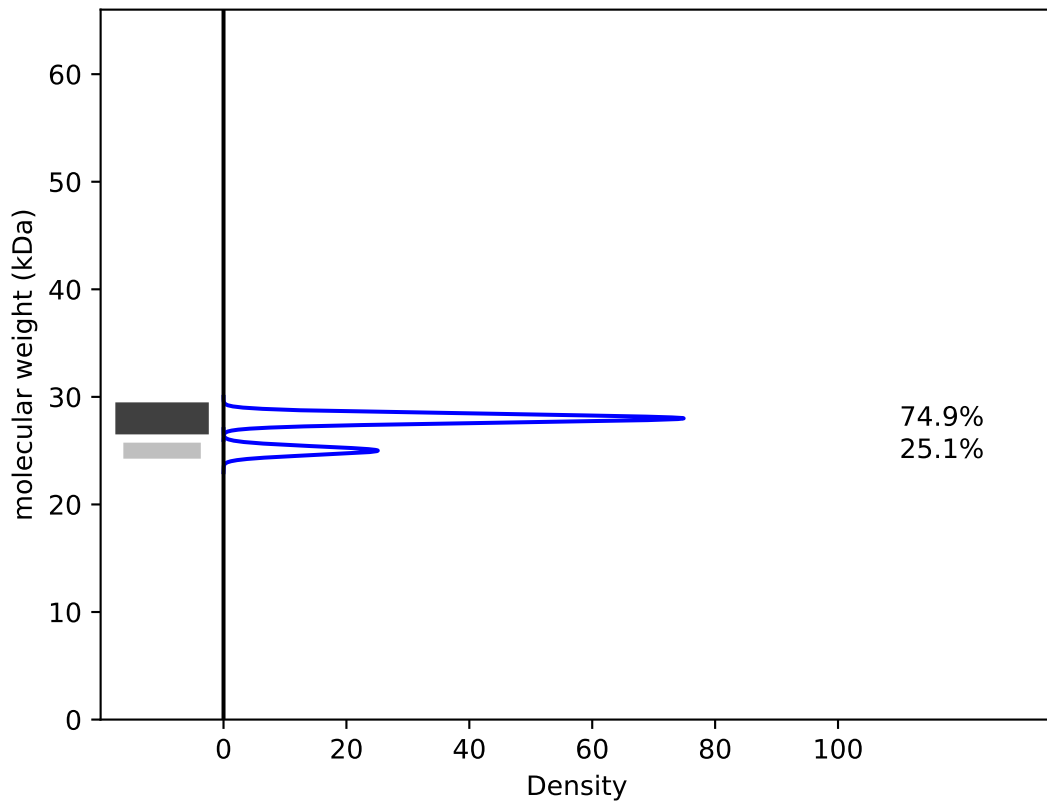

# P32119

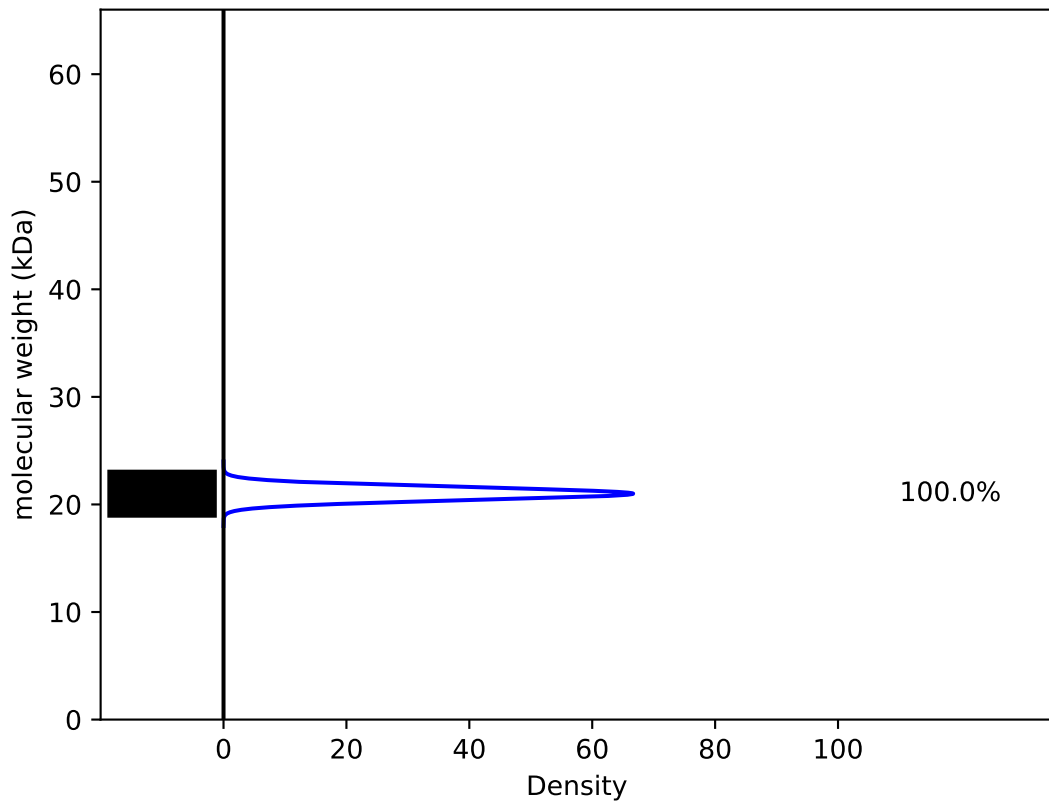

P32322

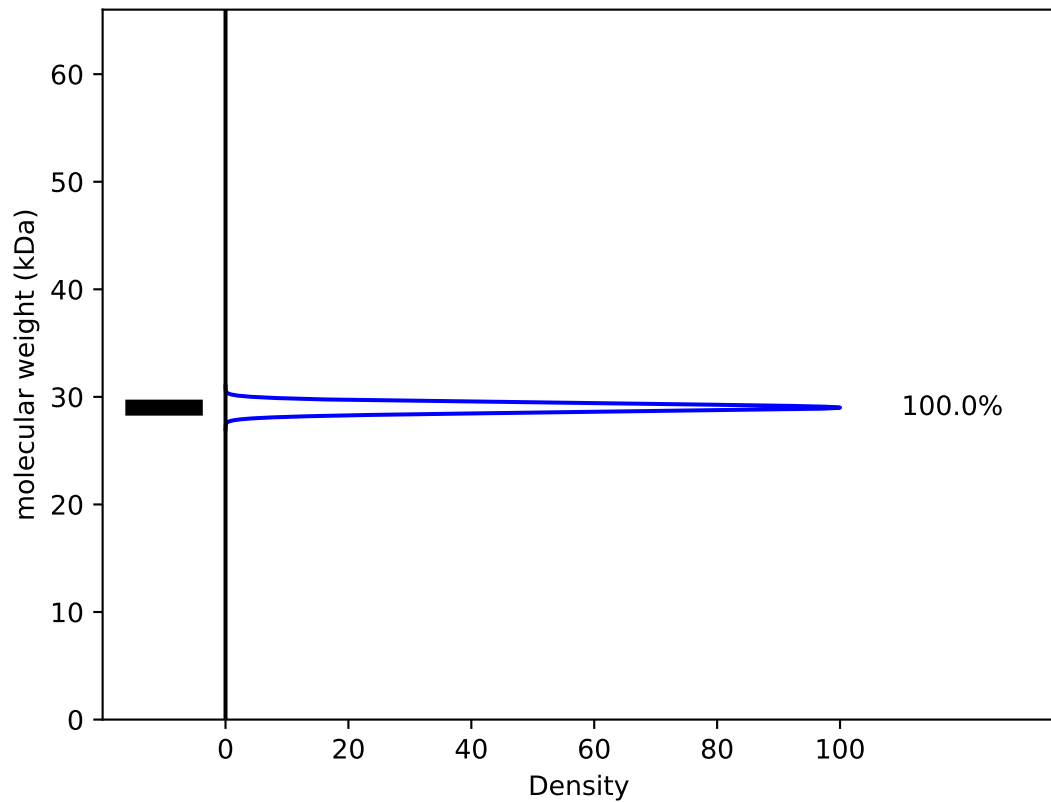

# P32929

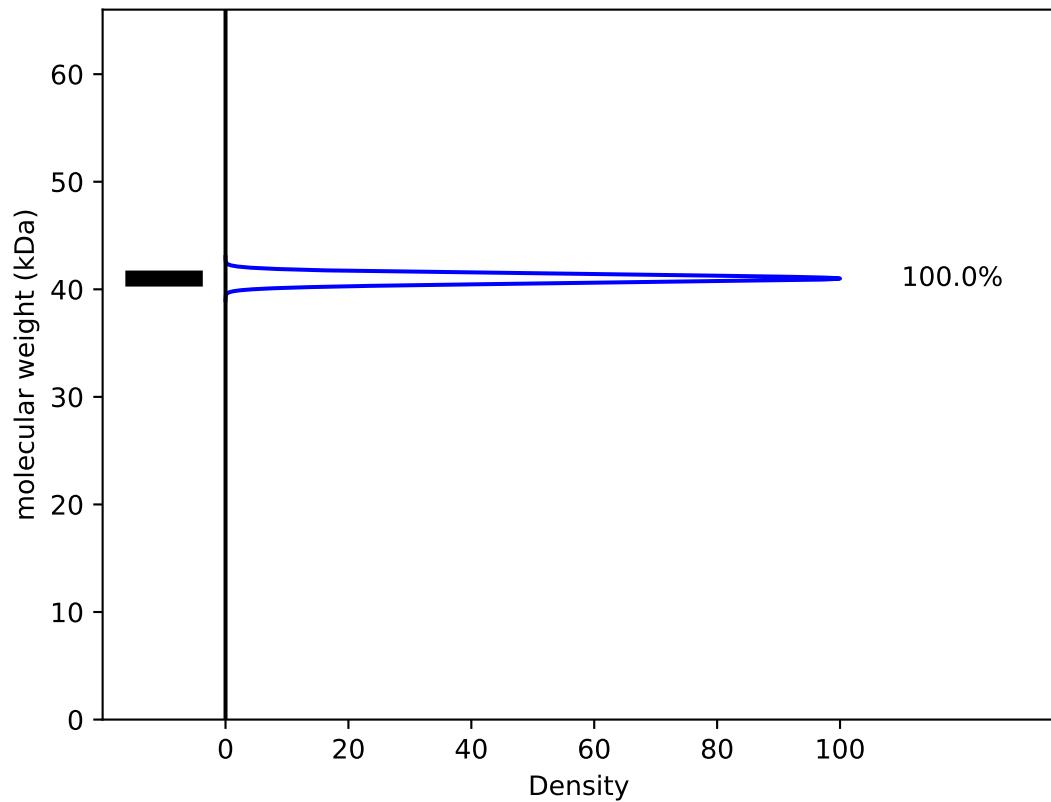

# P32969

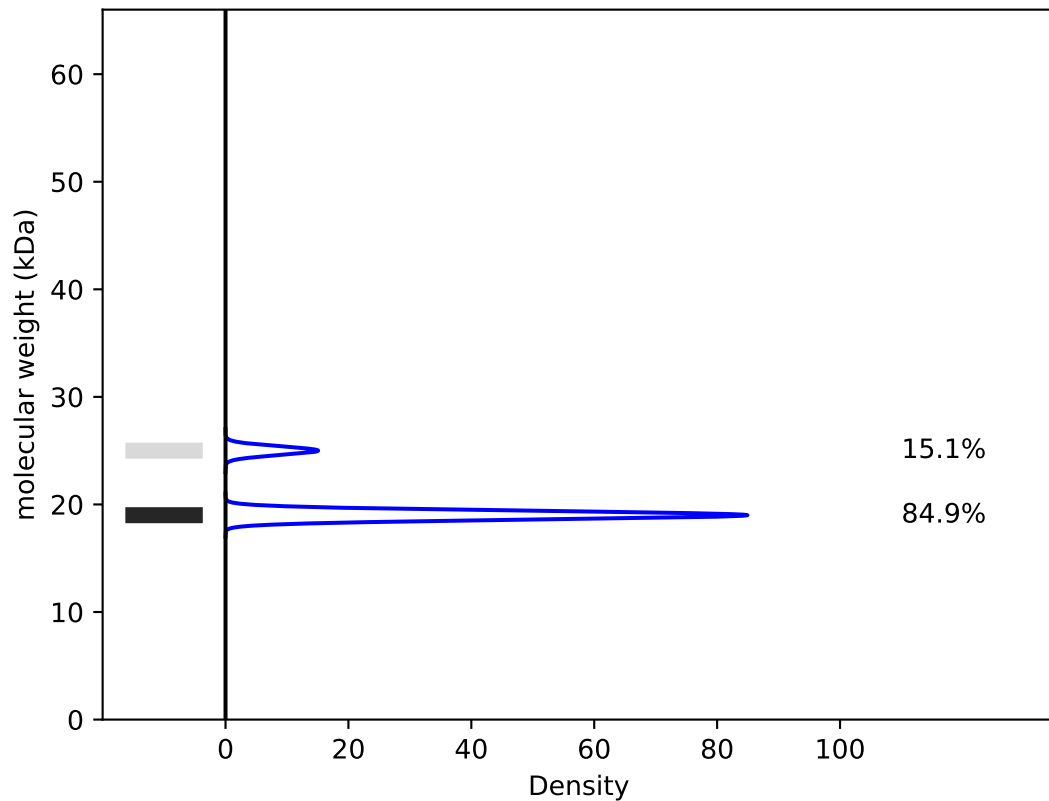



# P34896

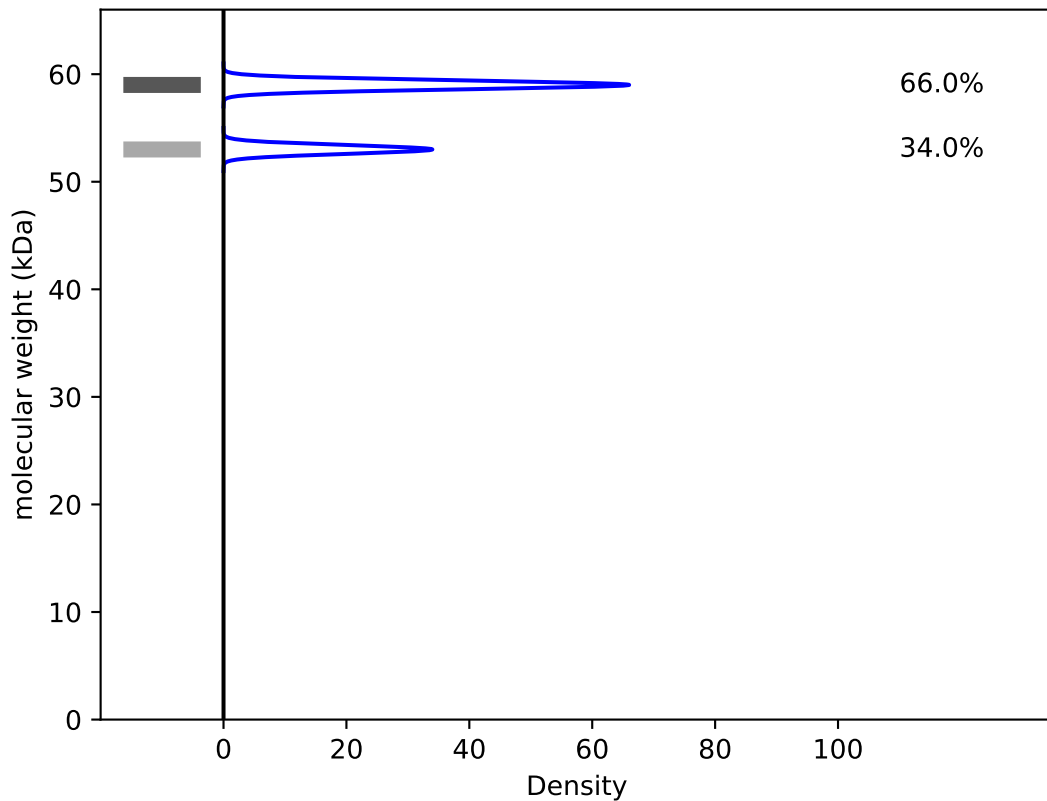

P34897



P35232

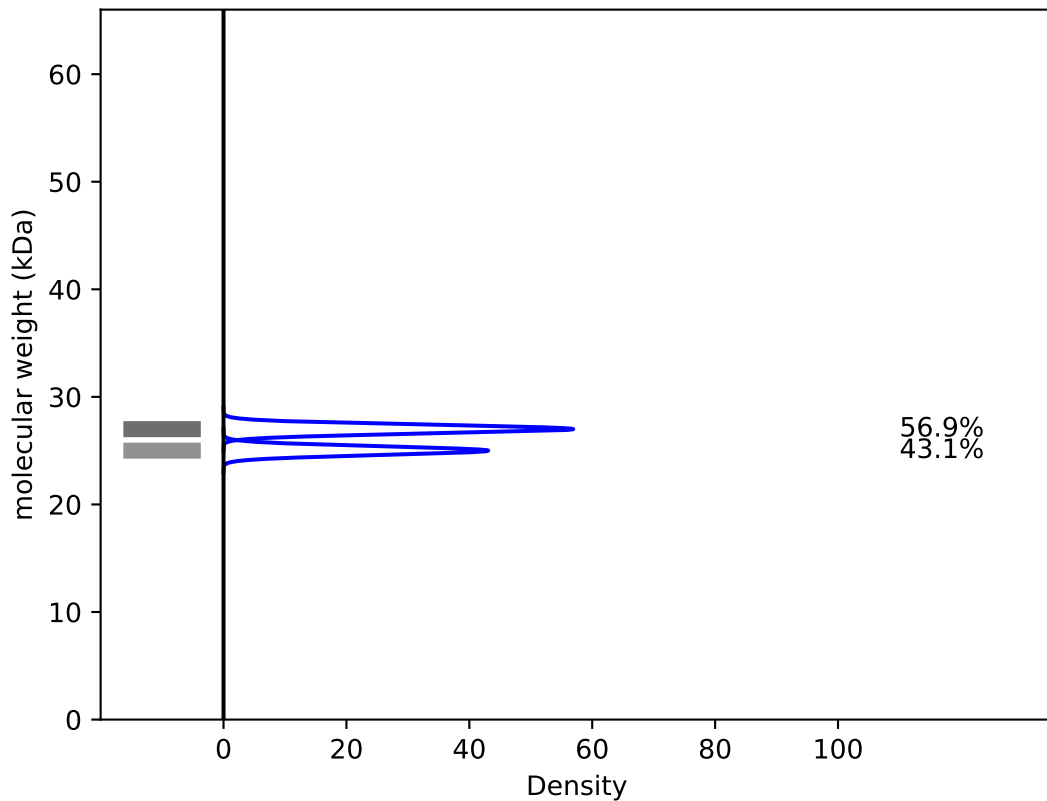

P35237

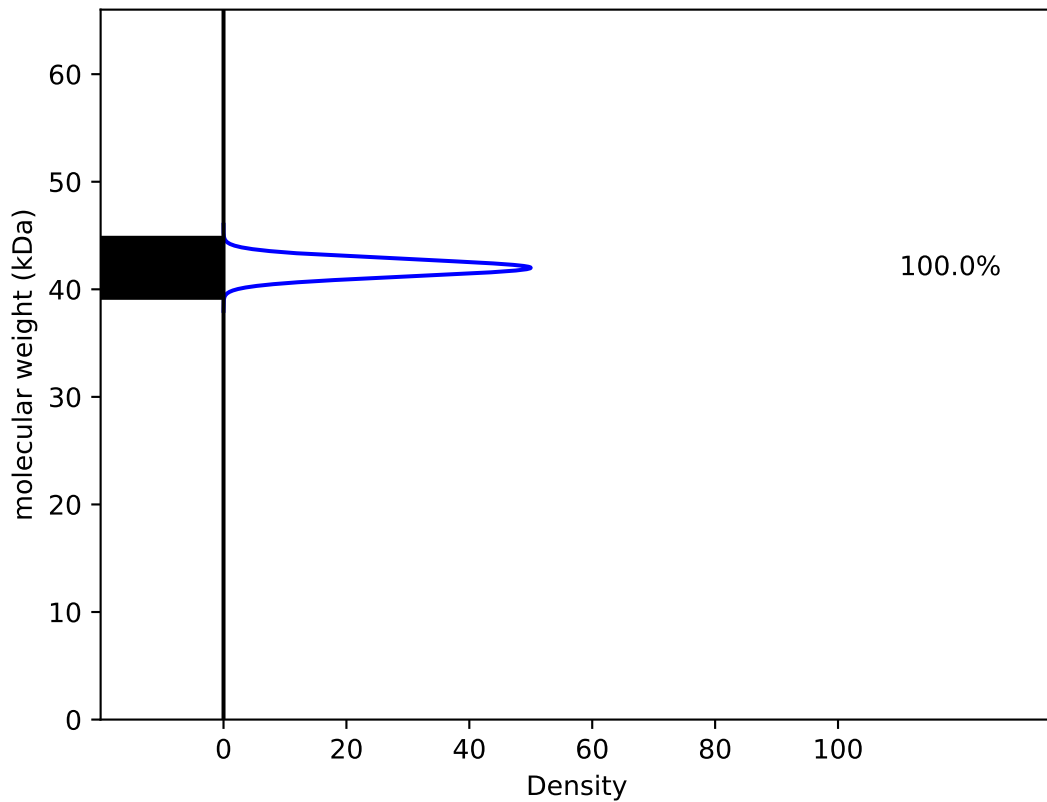

P35249



# P35250

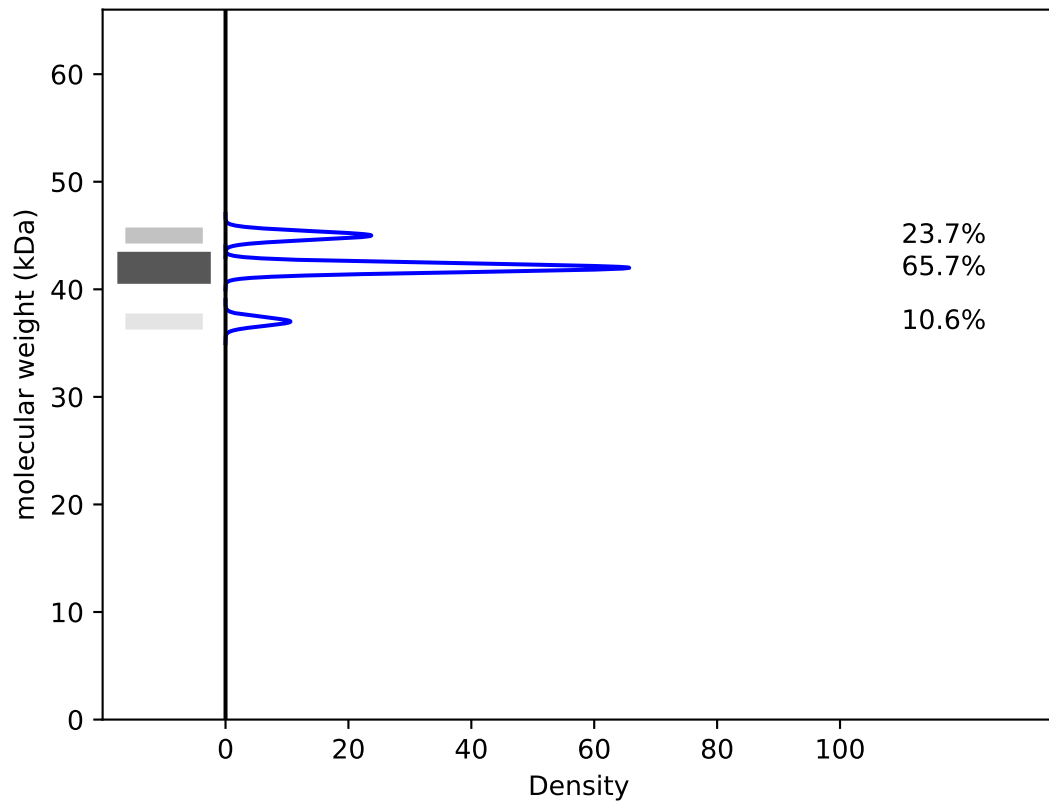

# P35270

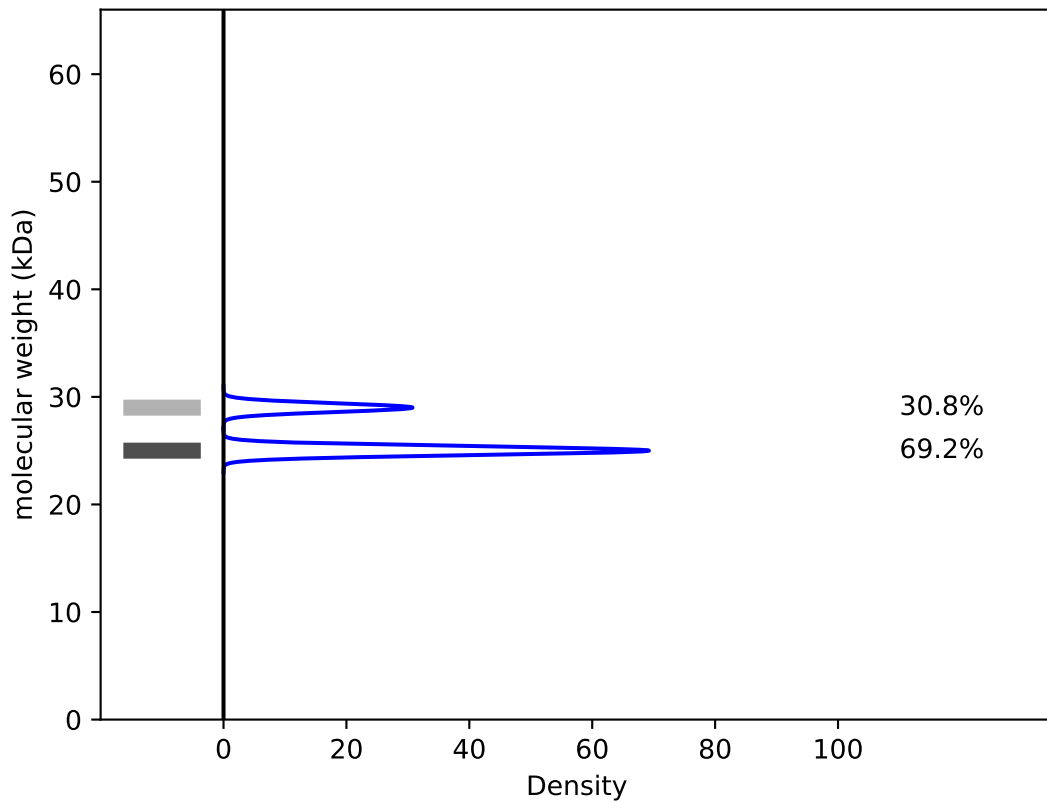

P35613

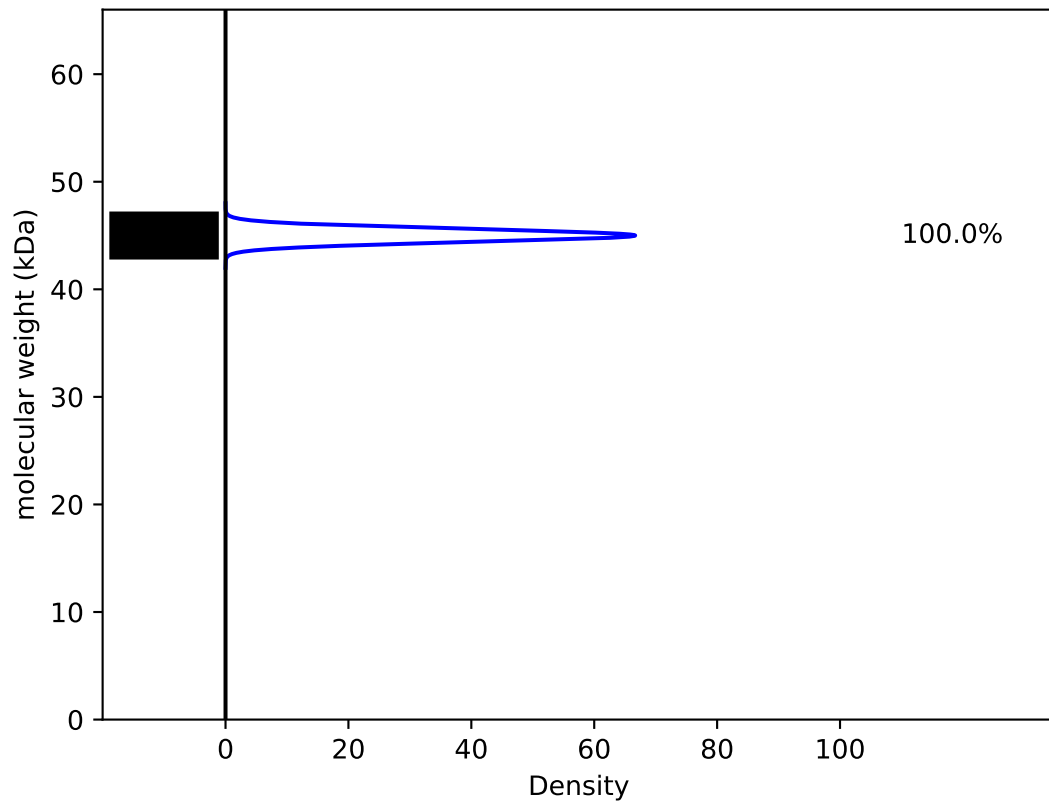



# P35637

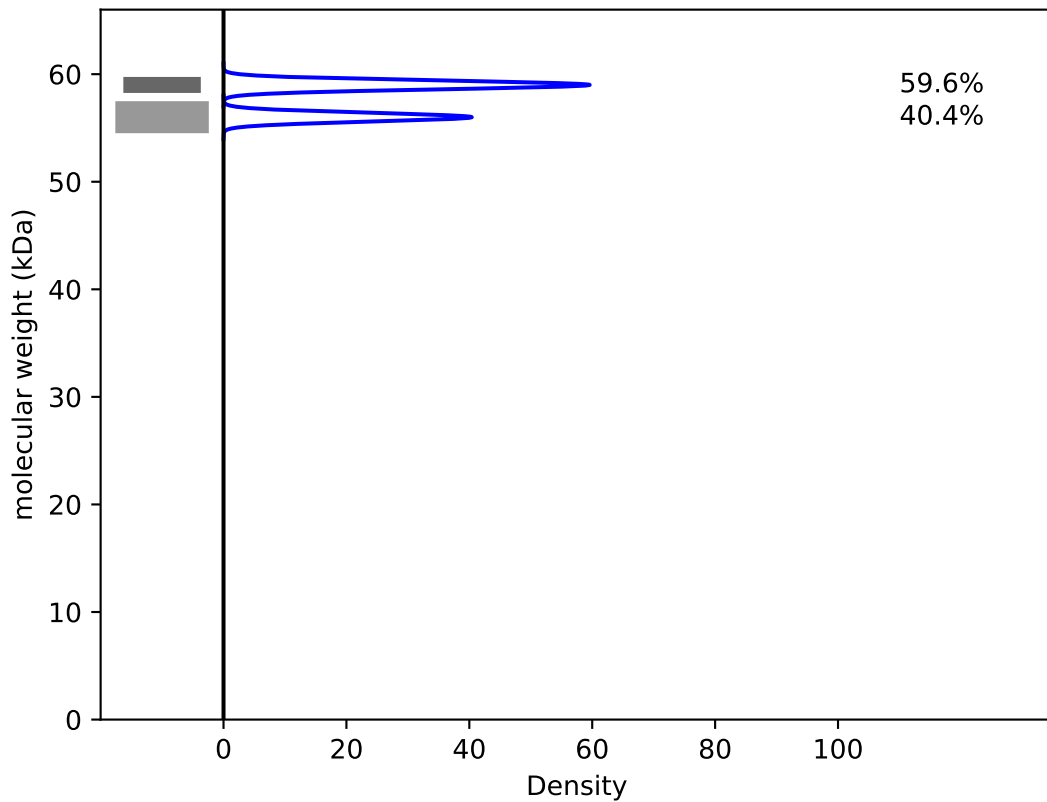

# Q92804

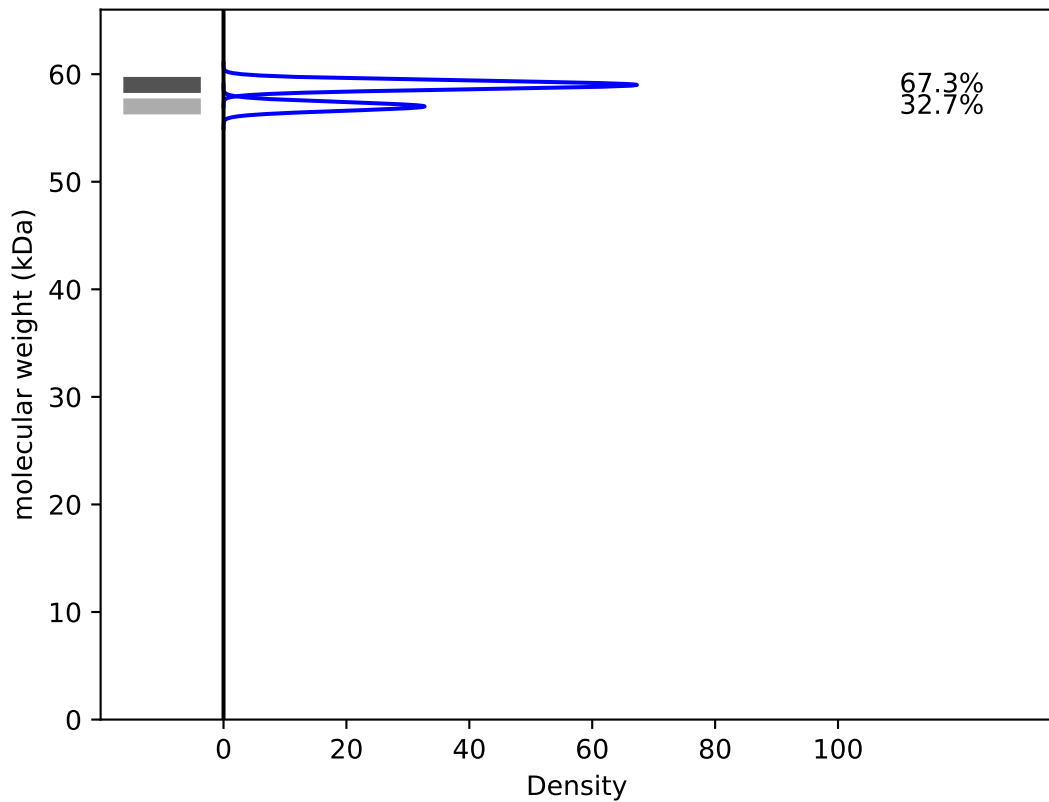

P35659



P35914



# P35998

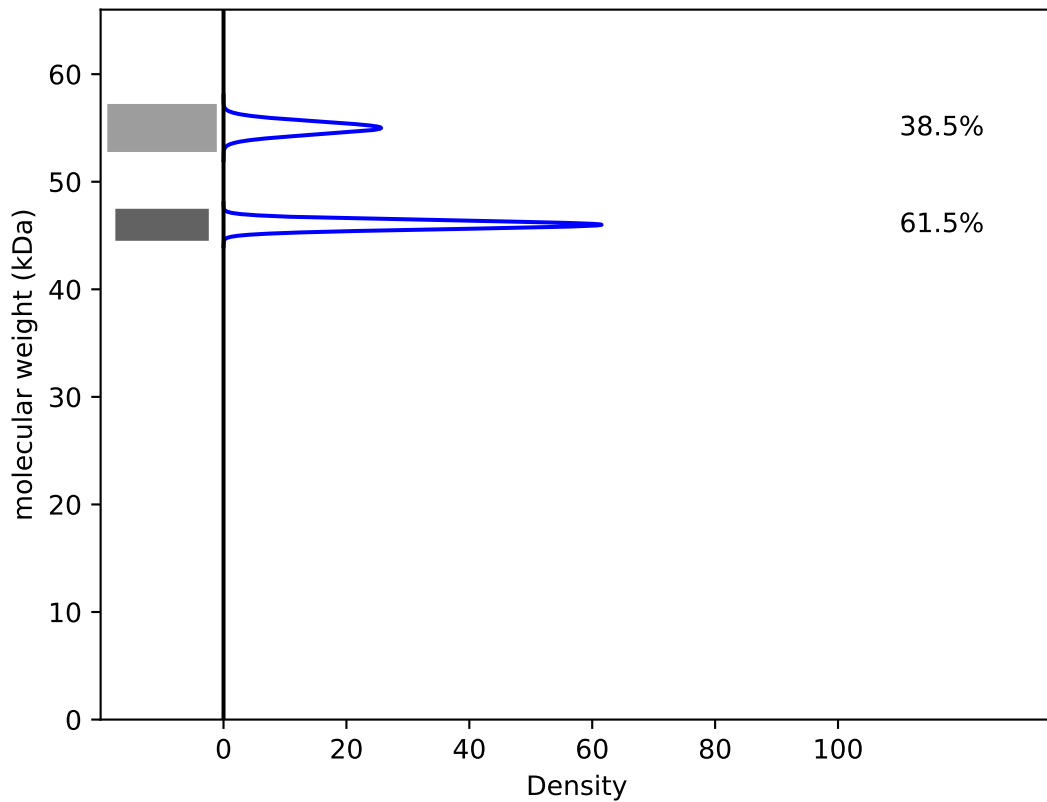

# P36404

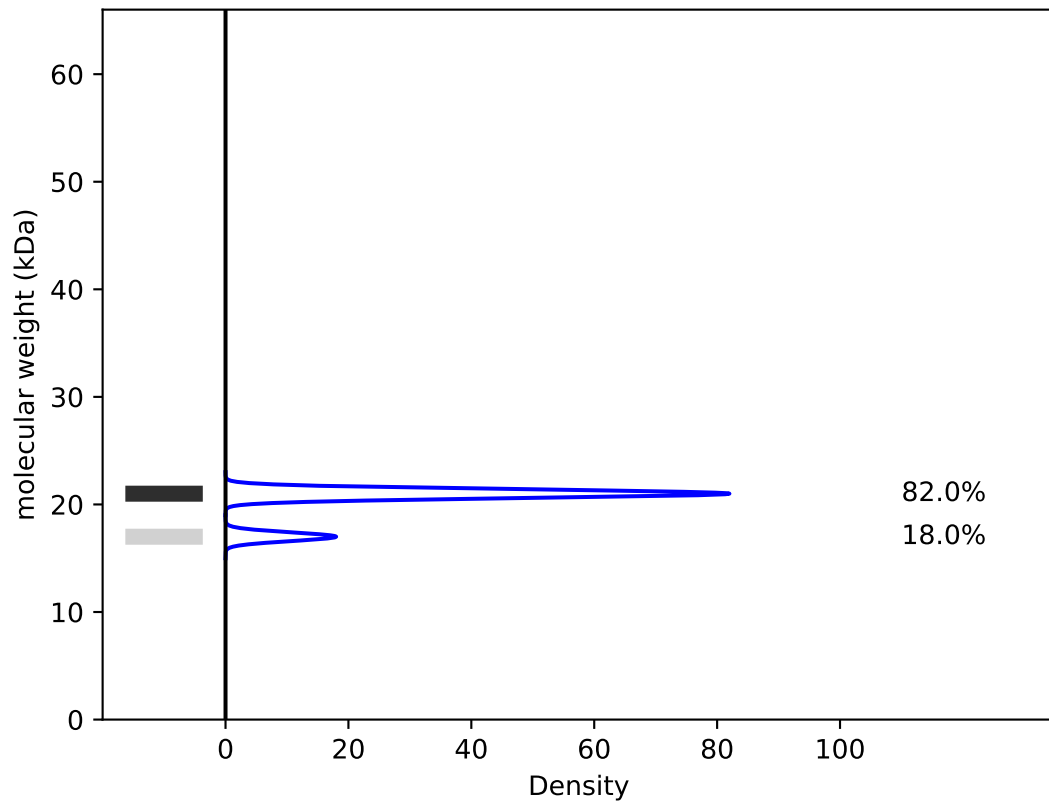

P36507



# P36542

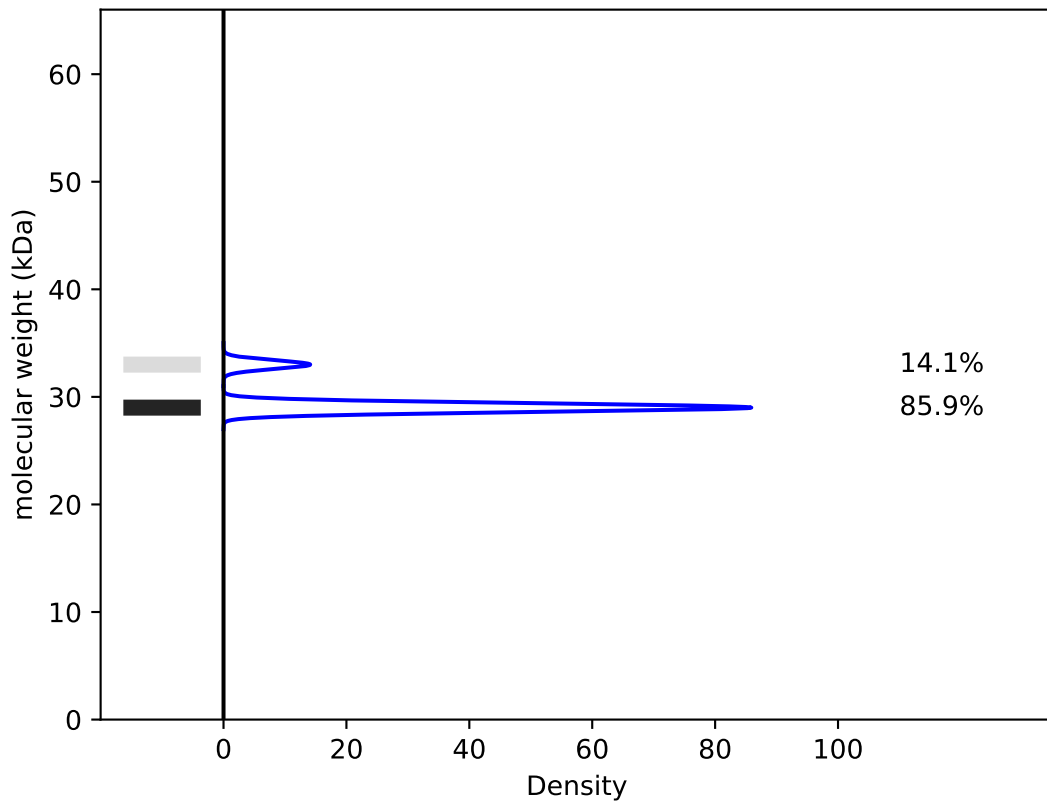



P36543

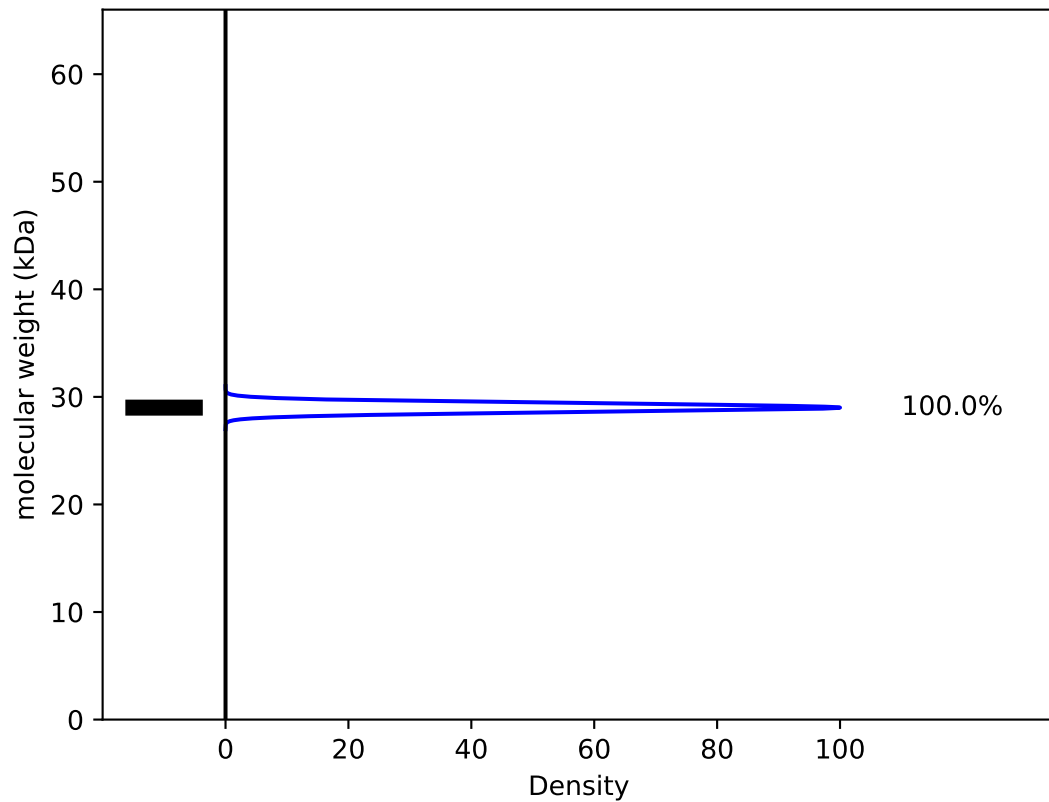

# Q96A05

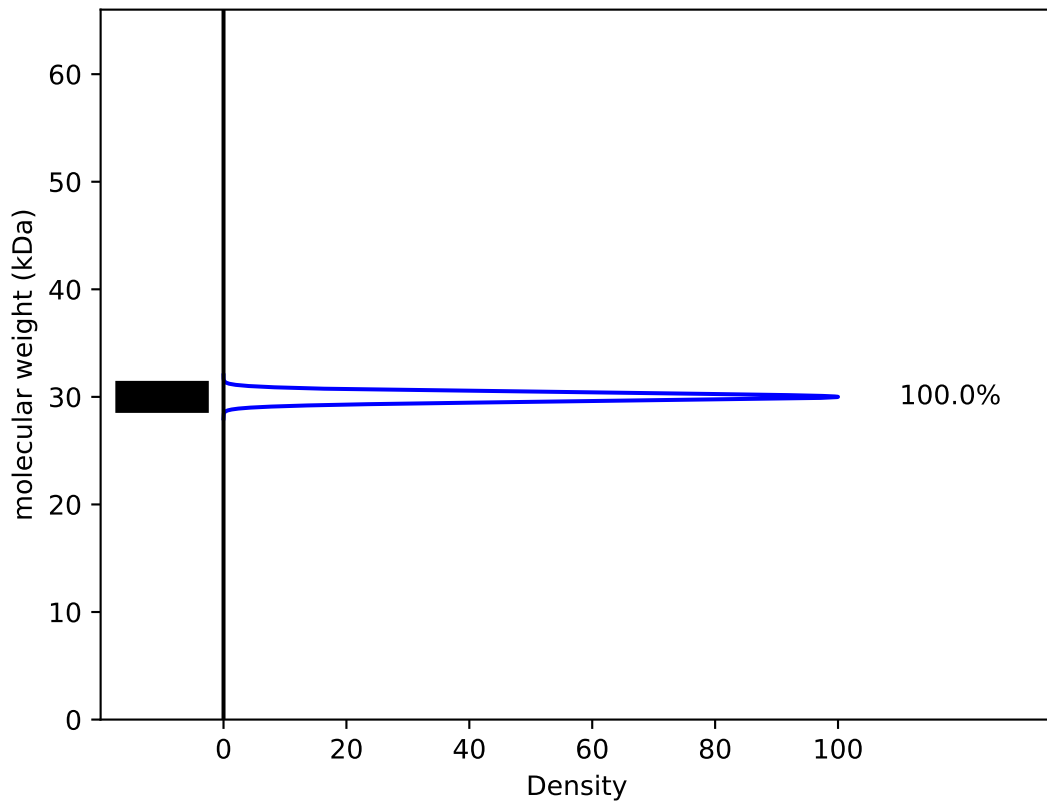

P36871

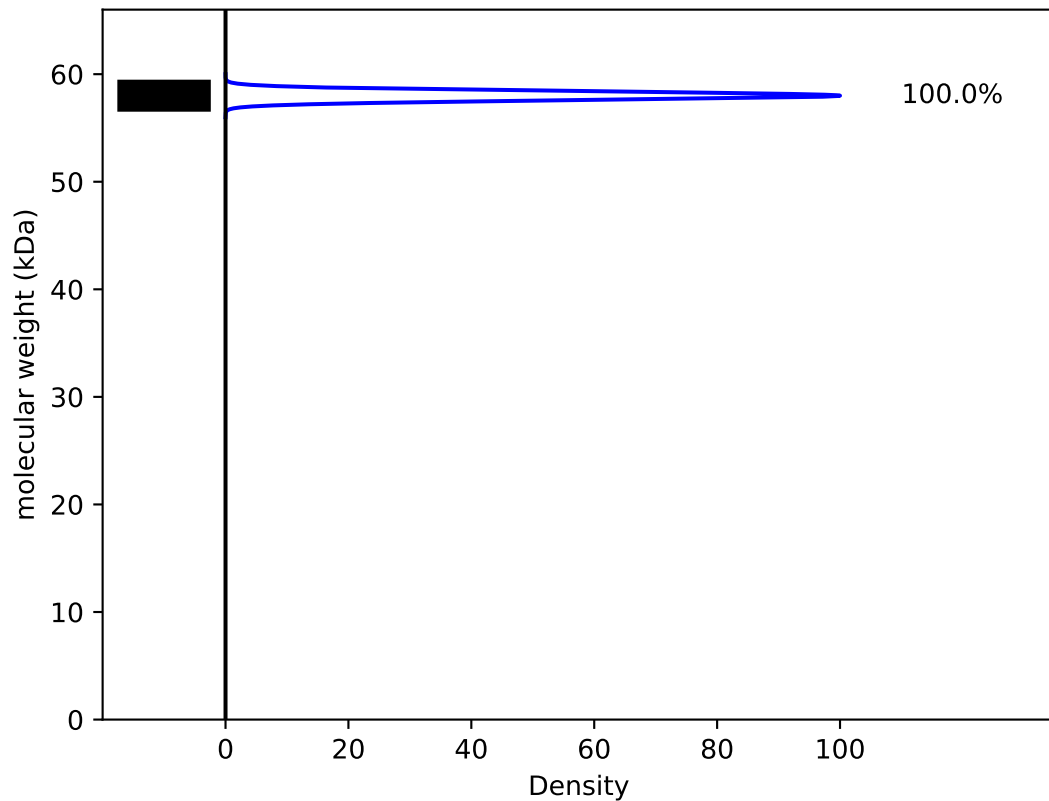

# P36873

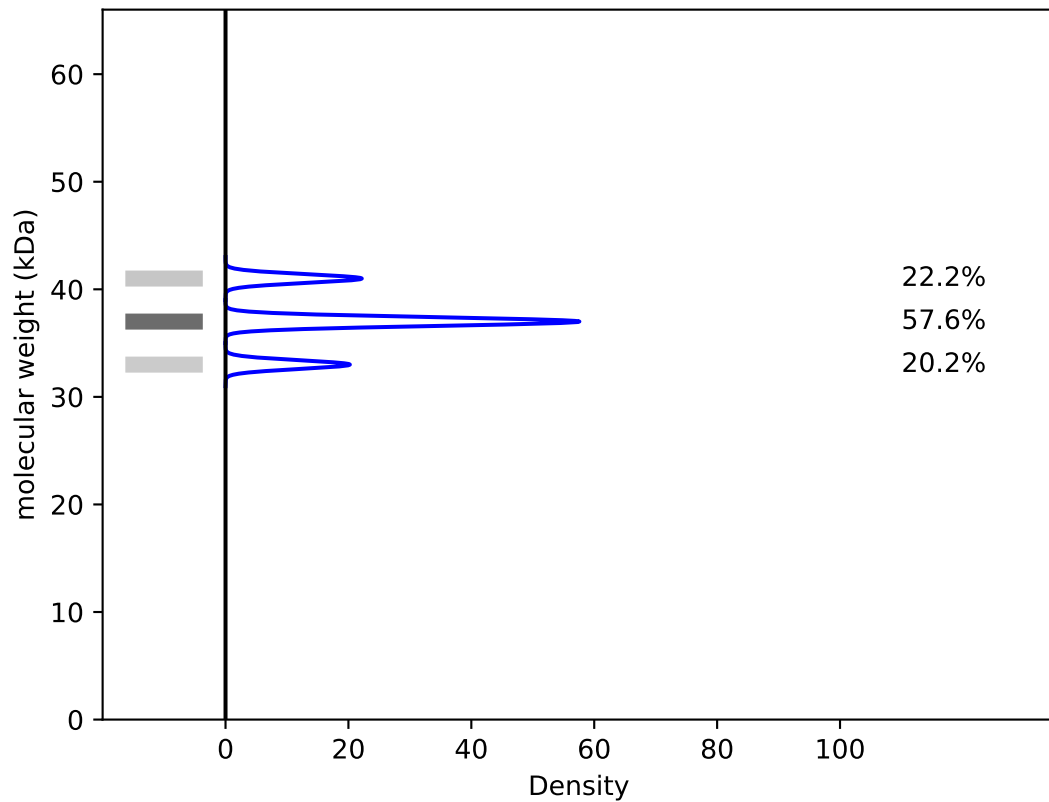

# P36952

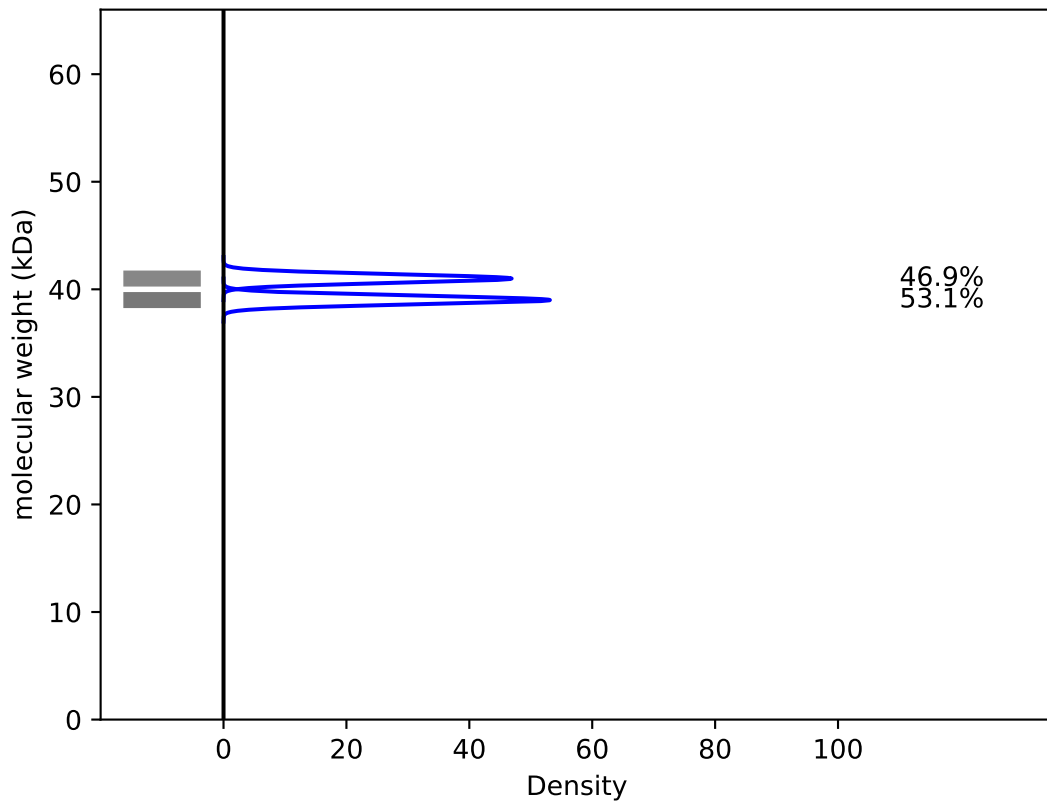

P36957



P37235



P84074





# P61601



P37268

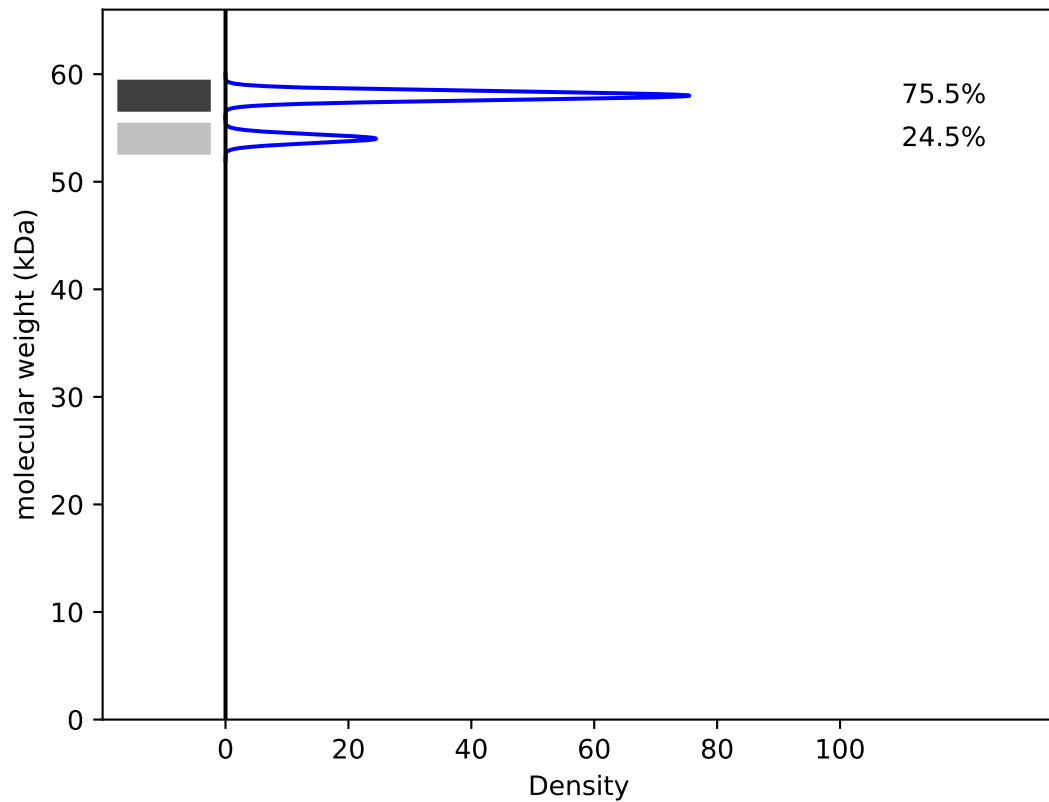

P37802



# Q9UI15



P37837



P38117

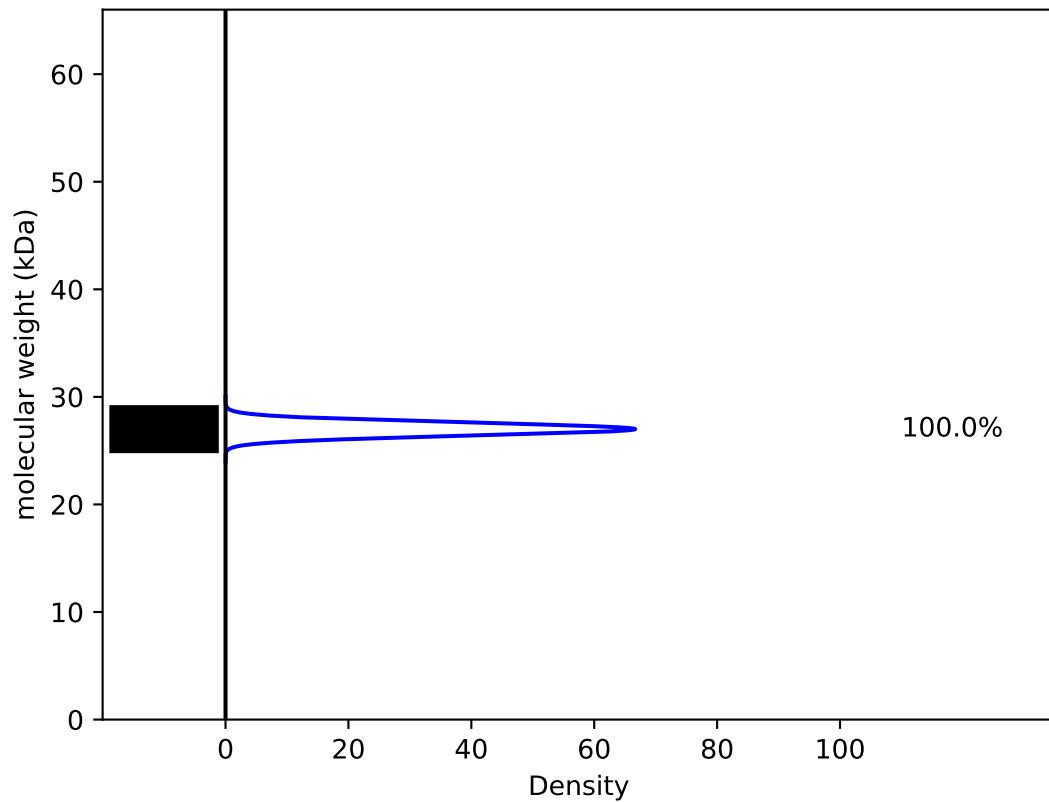

# P38159

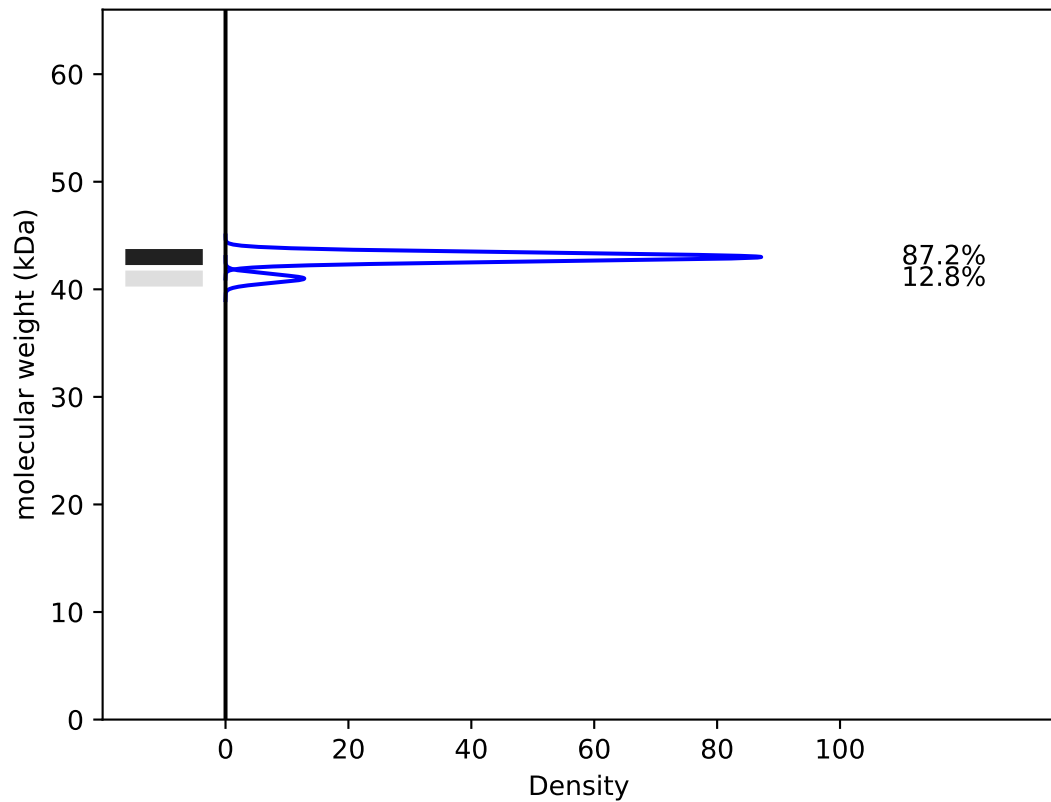

# Q96E39

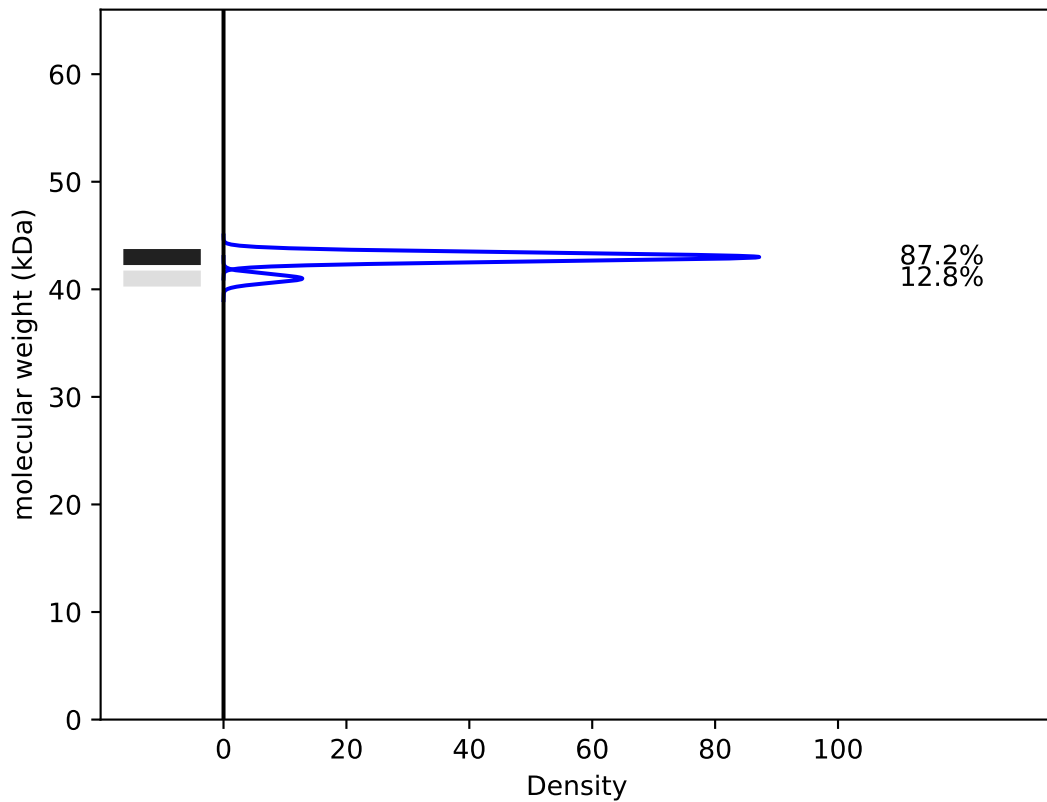



# P38919



# P39023

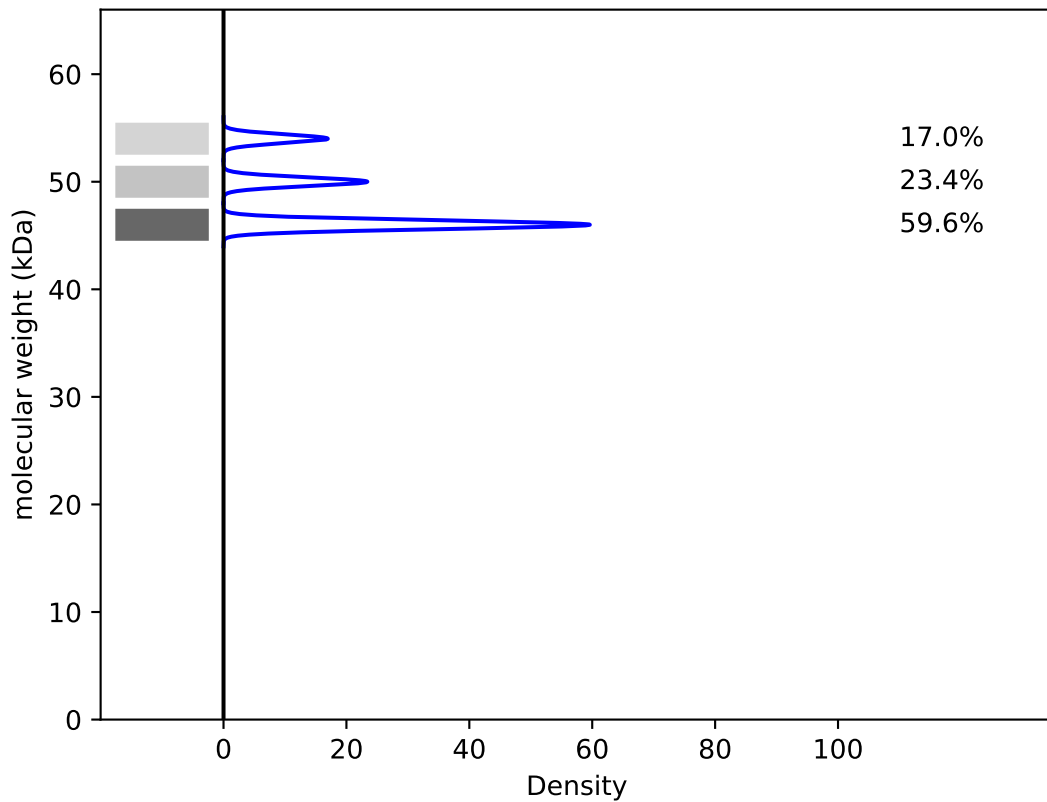

# Q92901



P39687

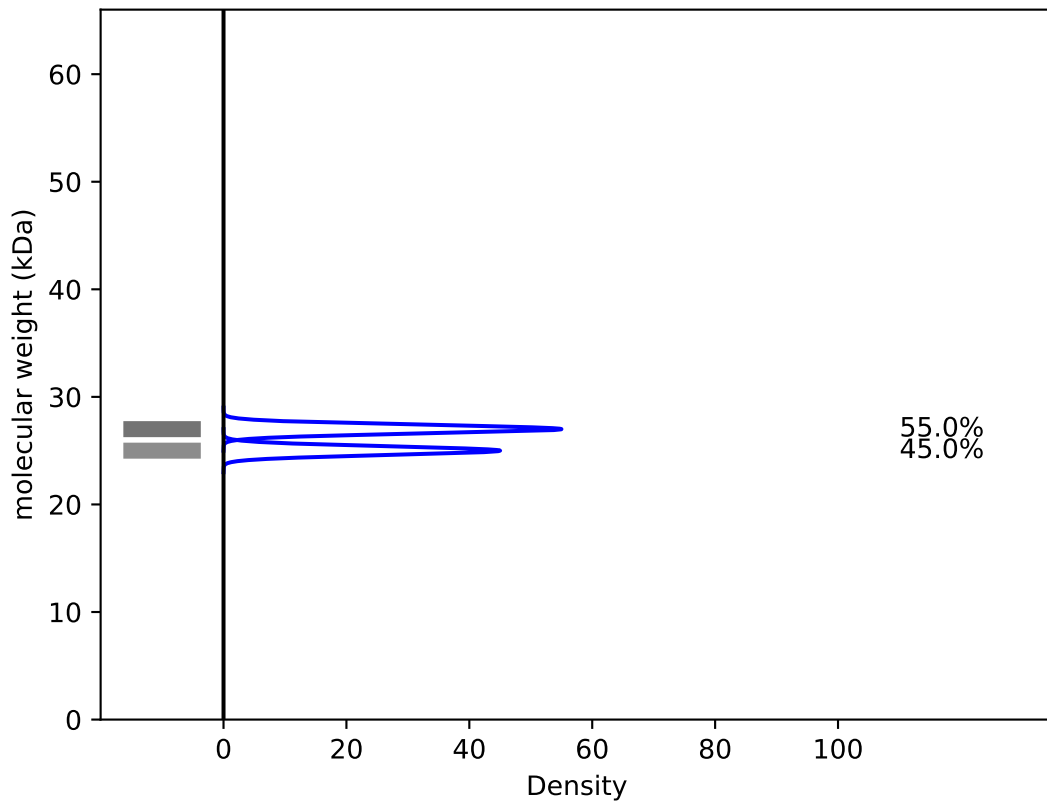

O43423



P39748

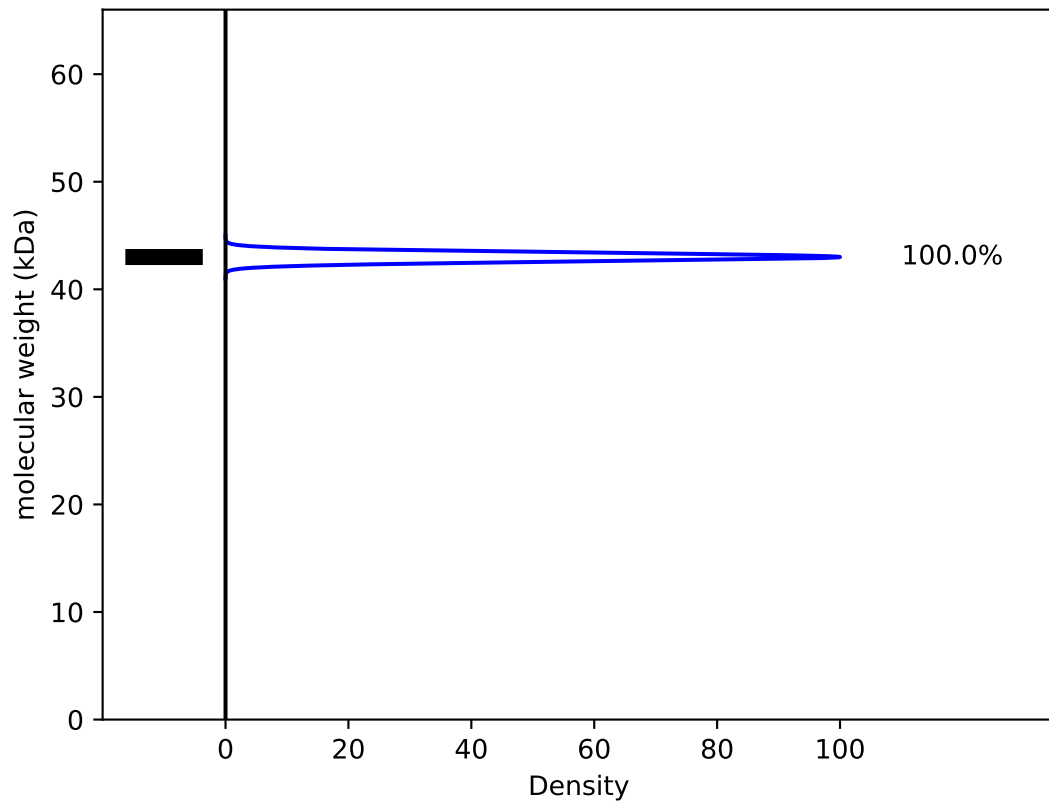

# P40121

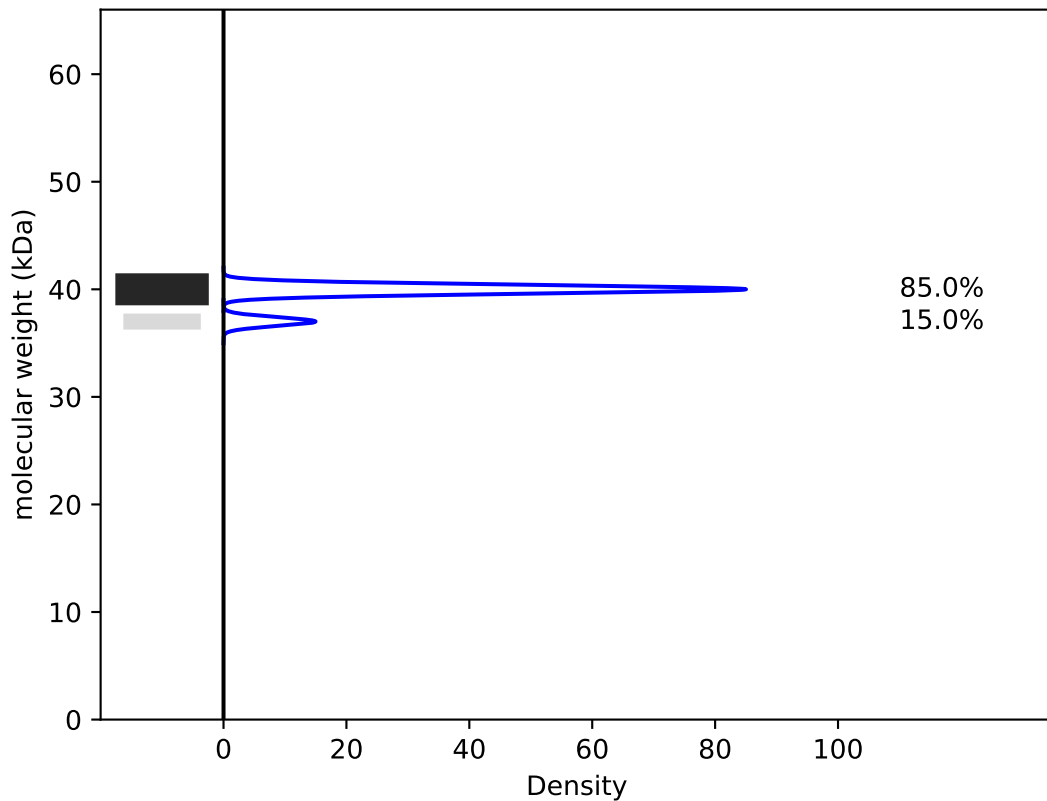

# P40227

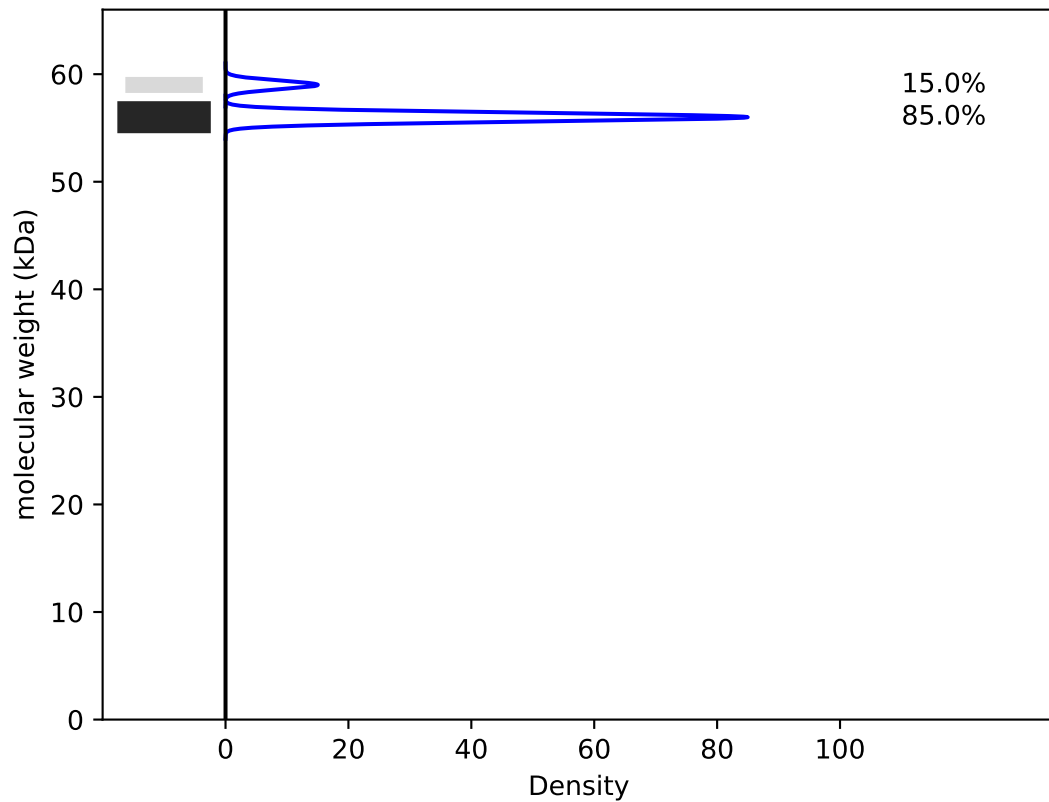



P40261



P40429



# P40616

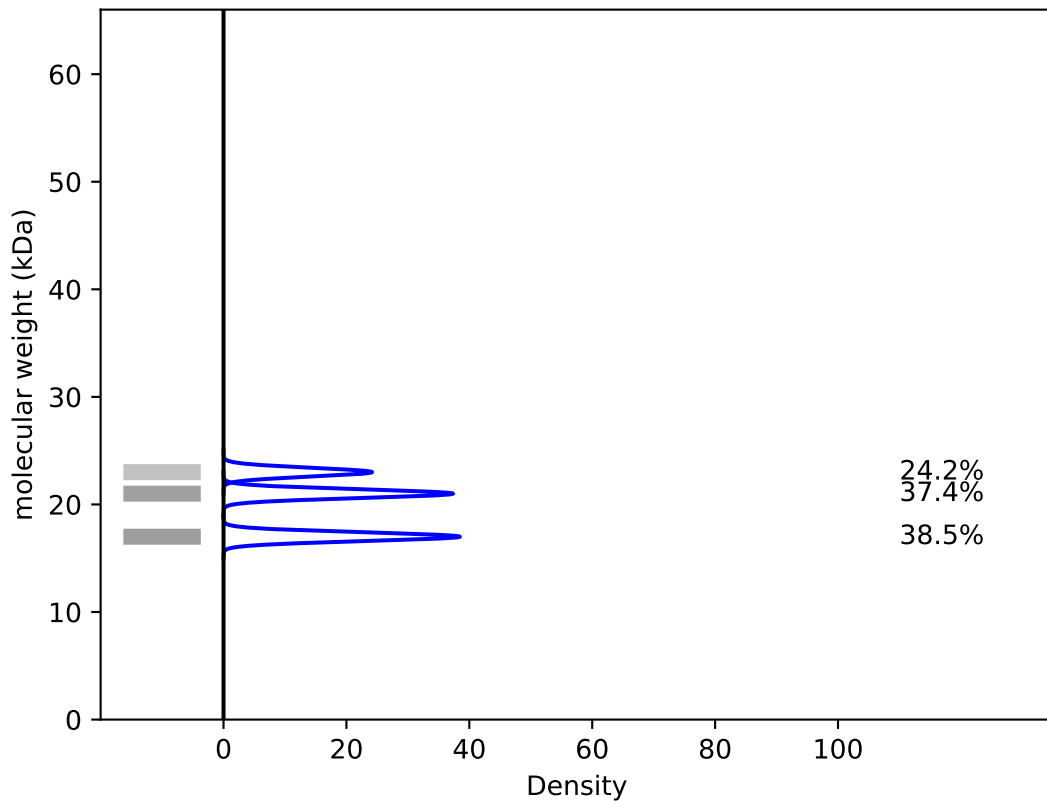

# P40925



P40926

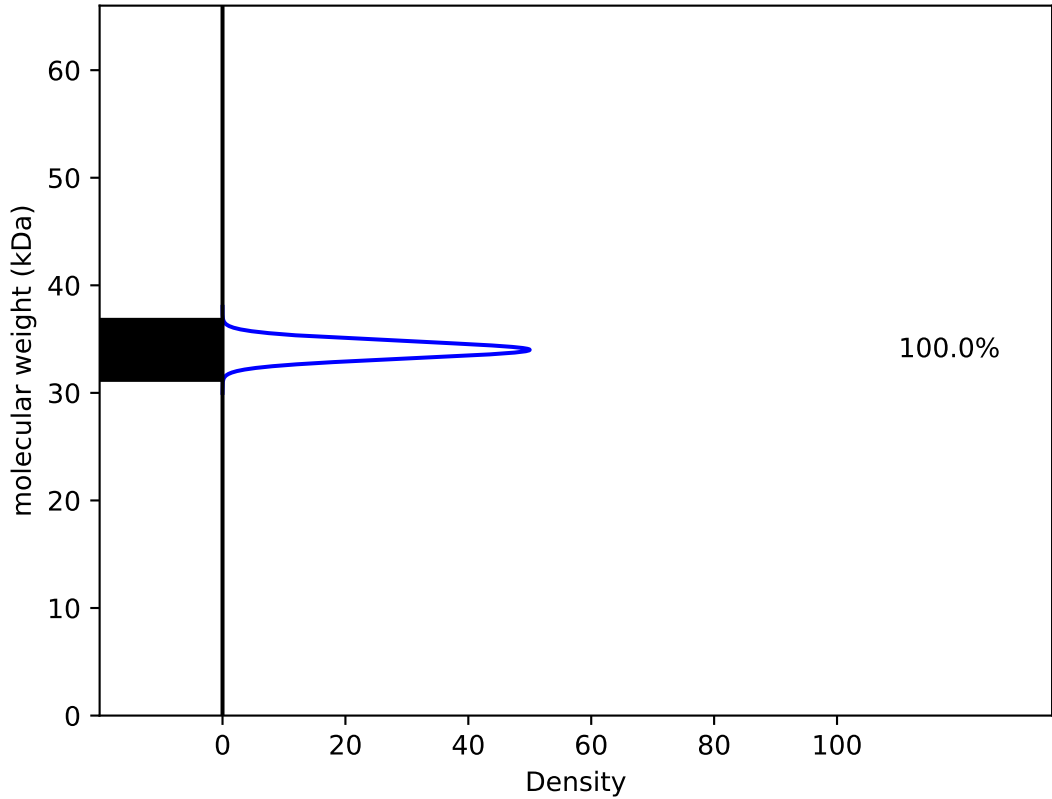

# P40937

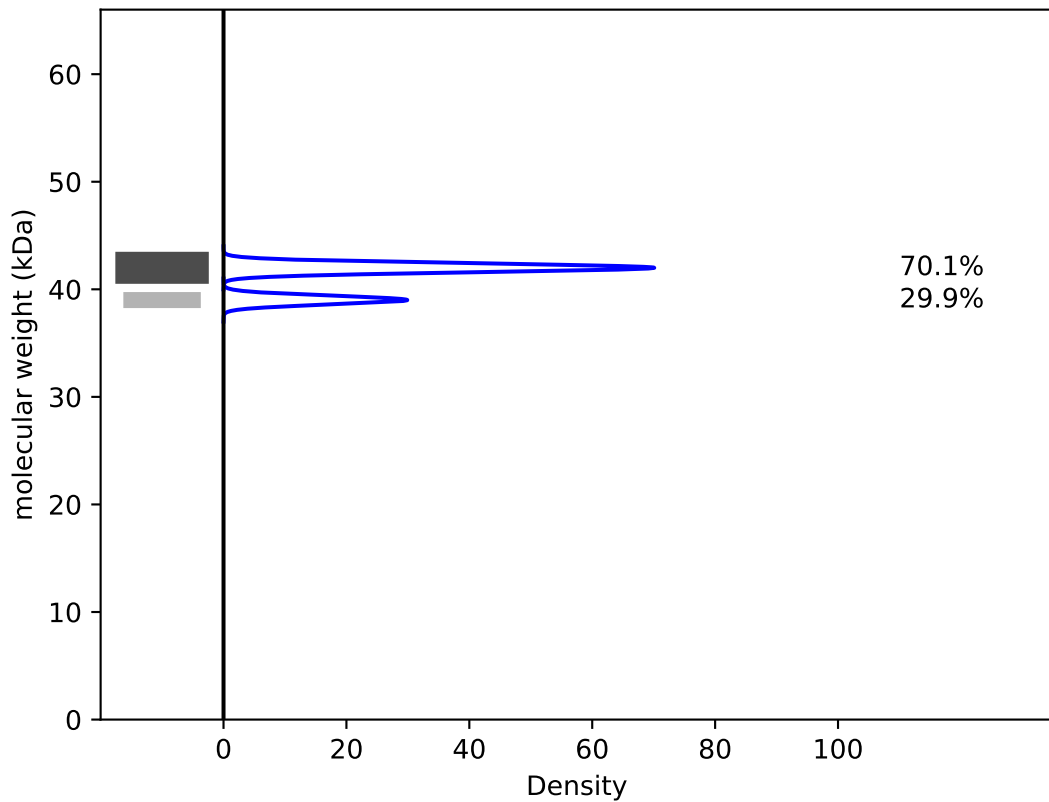

# P40938

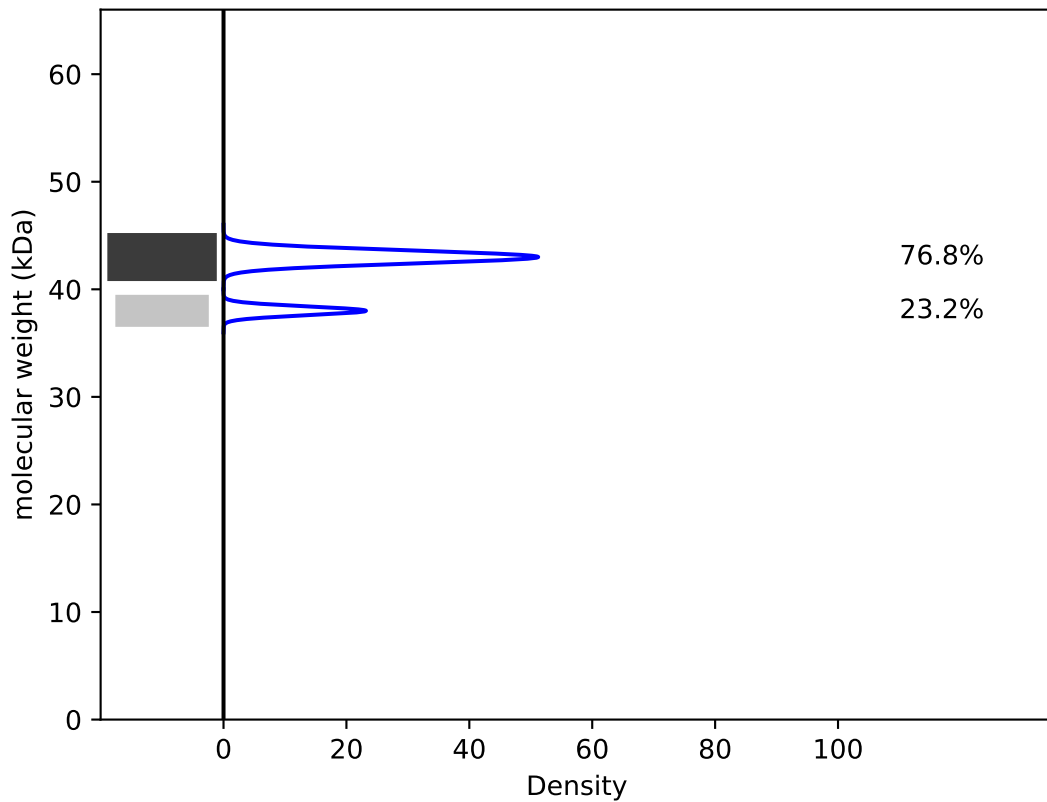

P41091





# Q2VIR3



P41227

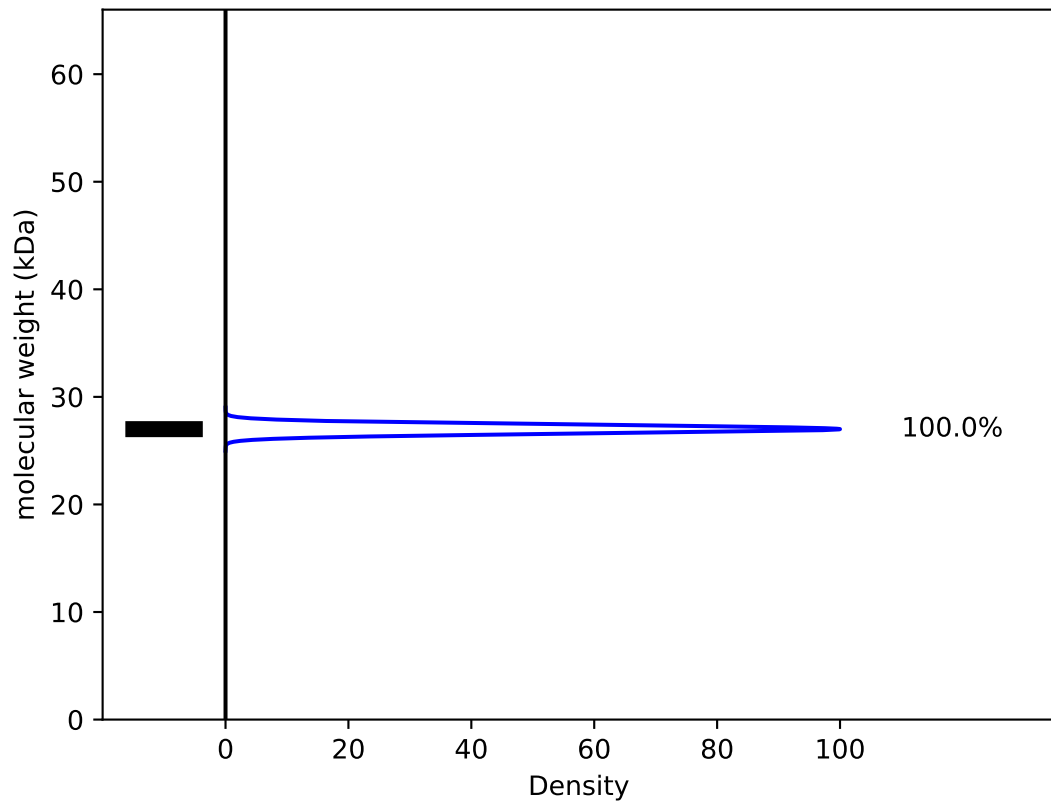

# Q9BSU3



# P42025

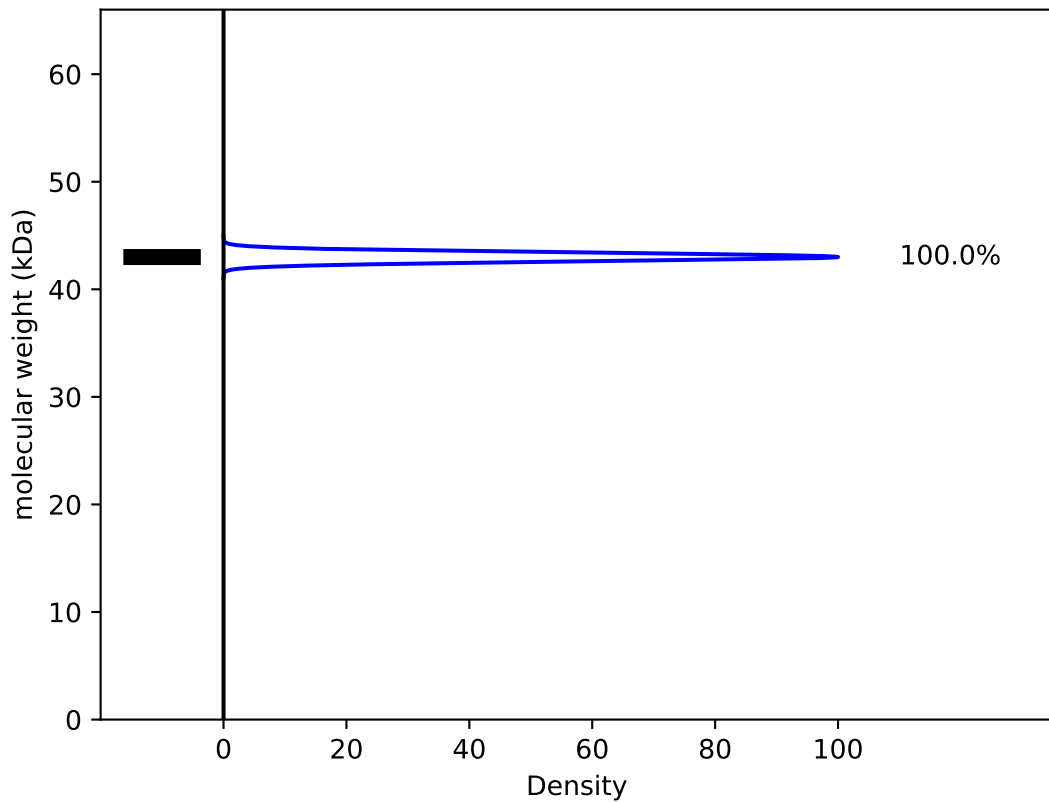

P42167



# P42330

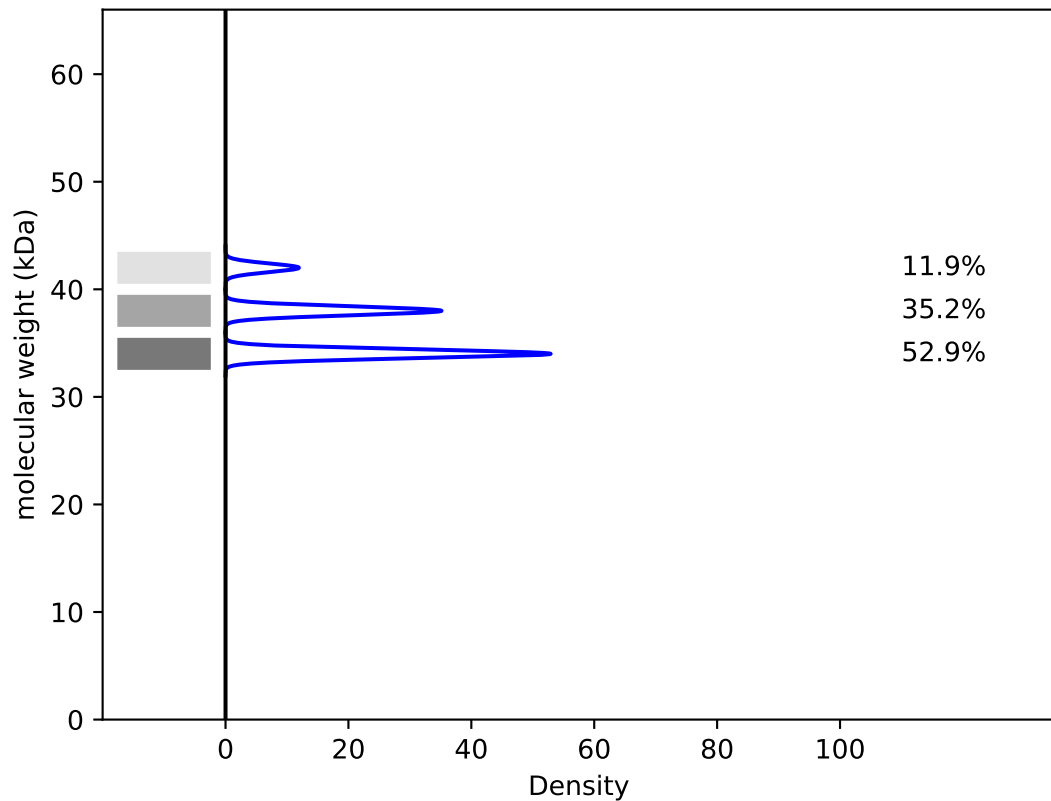

# Q04828

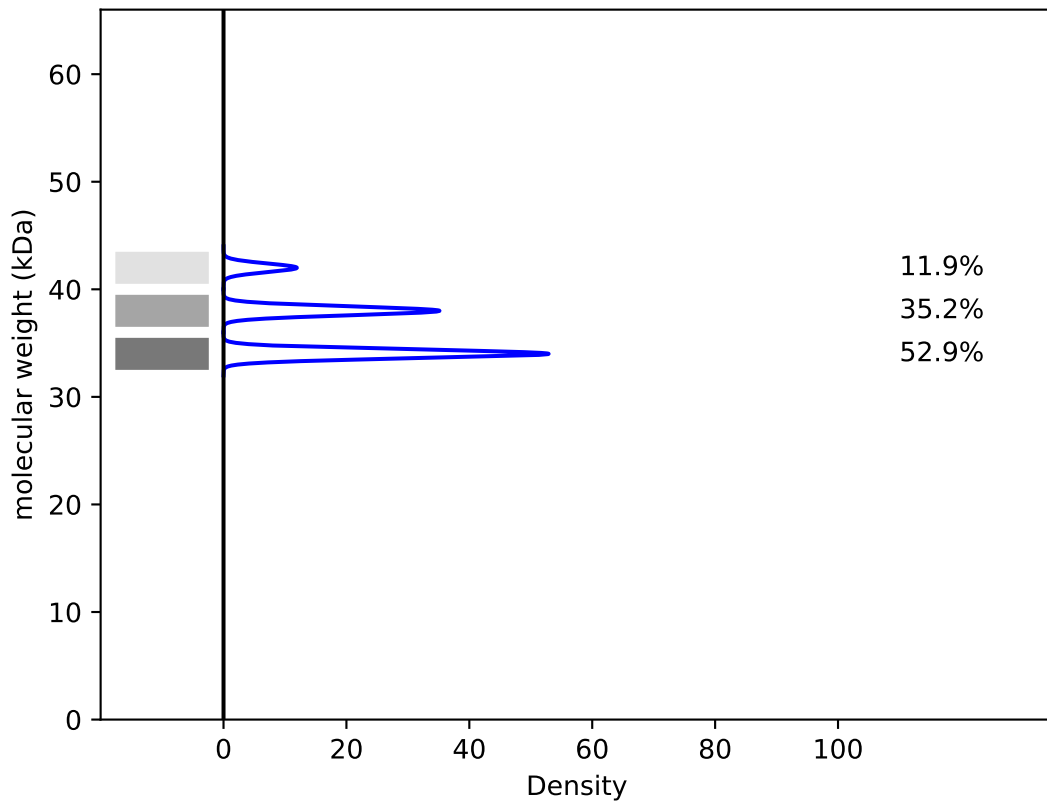

# P17516





# P52895



P42765

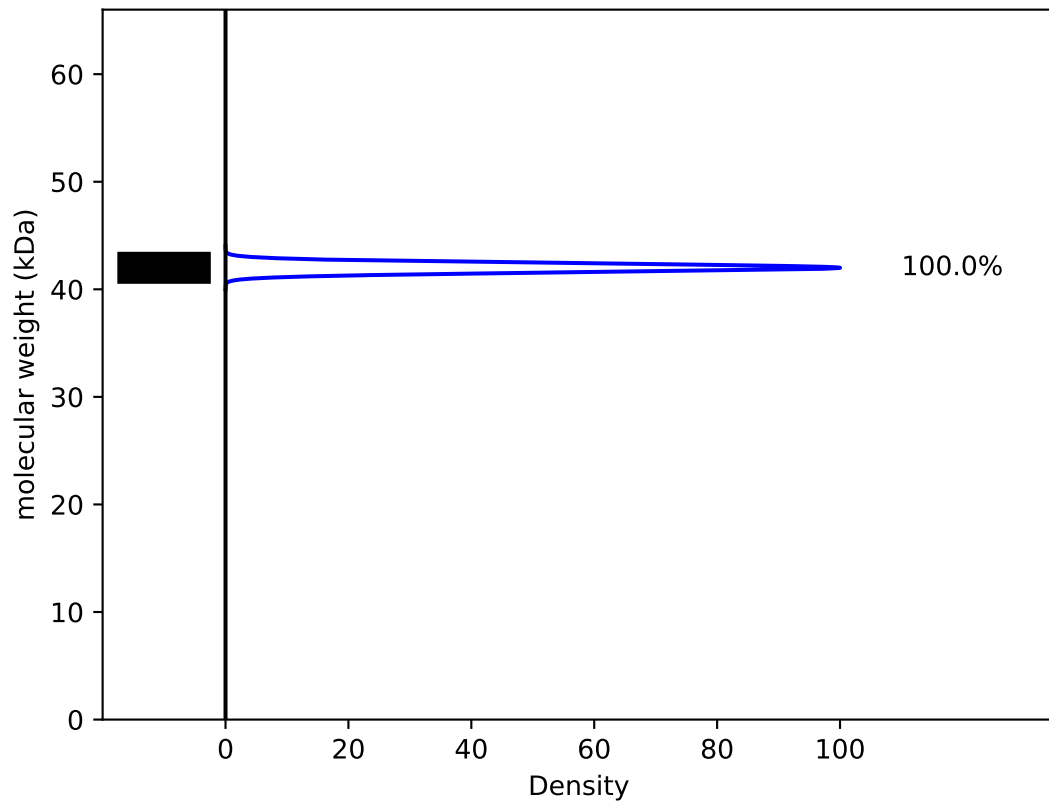

P43034



P43307



# P43490



# P43686

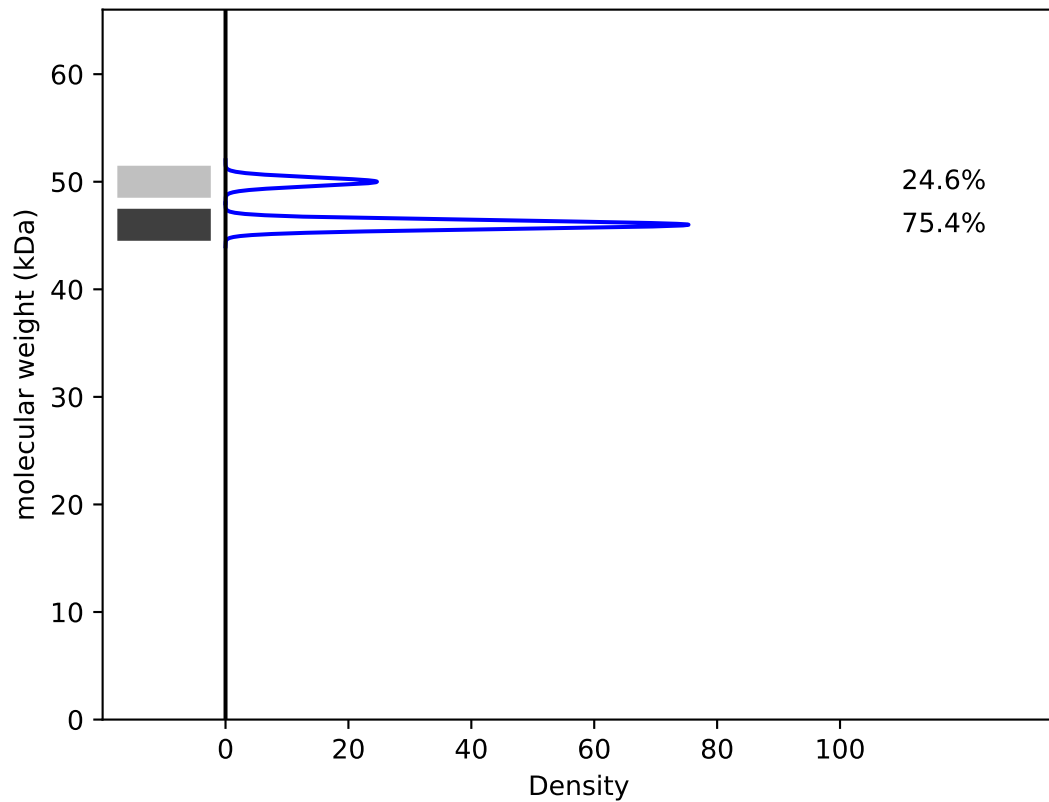

# P45877



# P45880

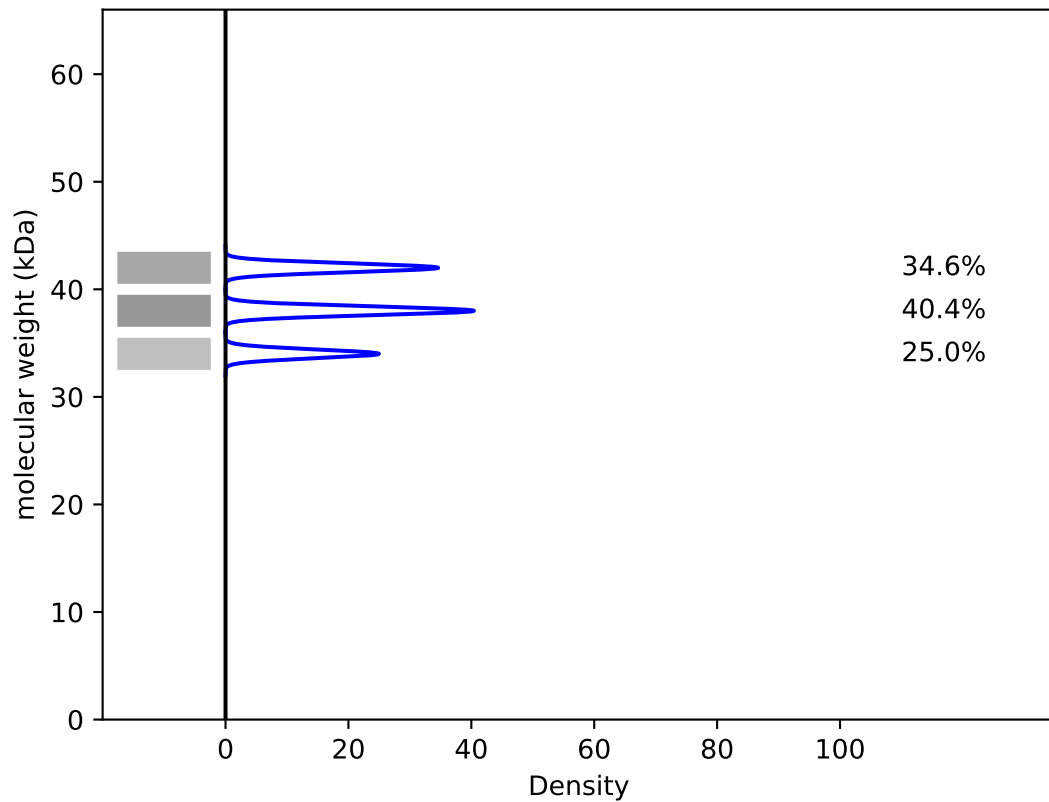



# P46108

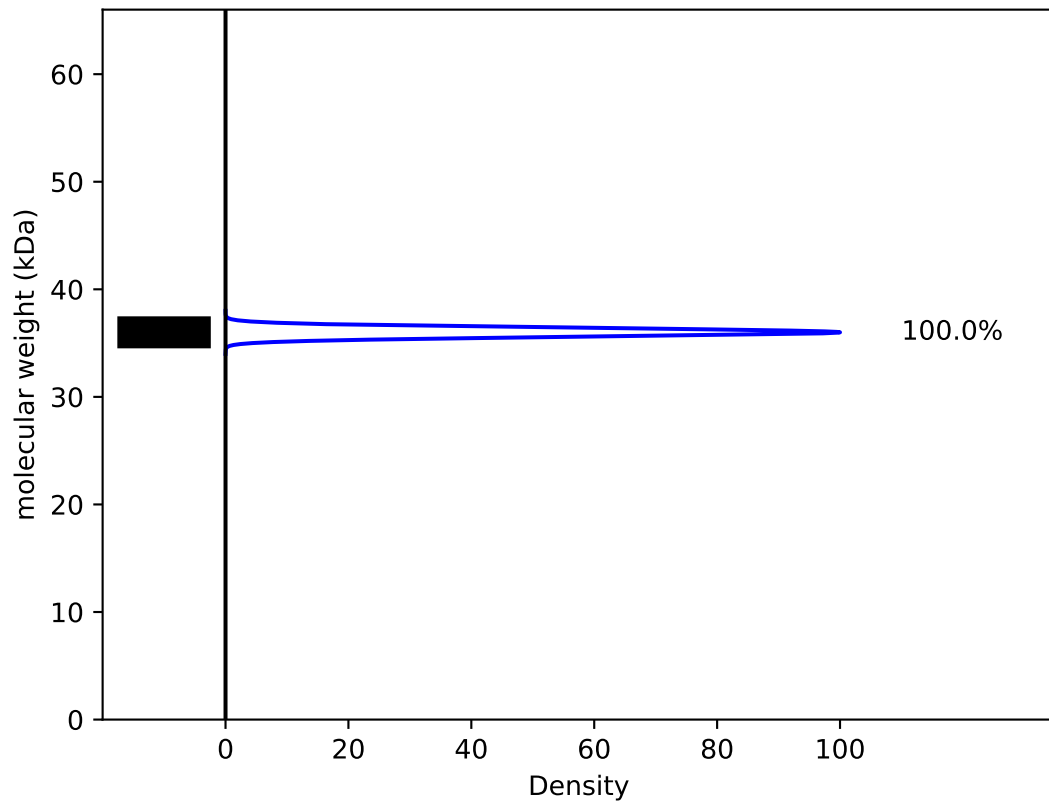

# P46109



# P46736

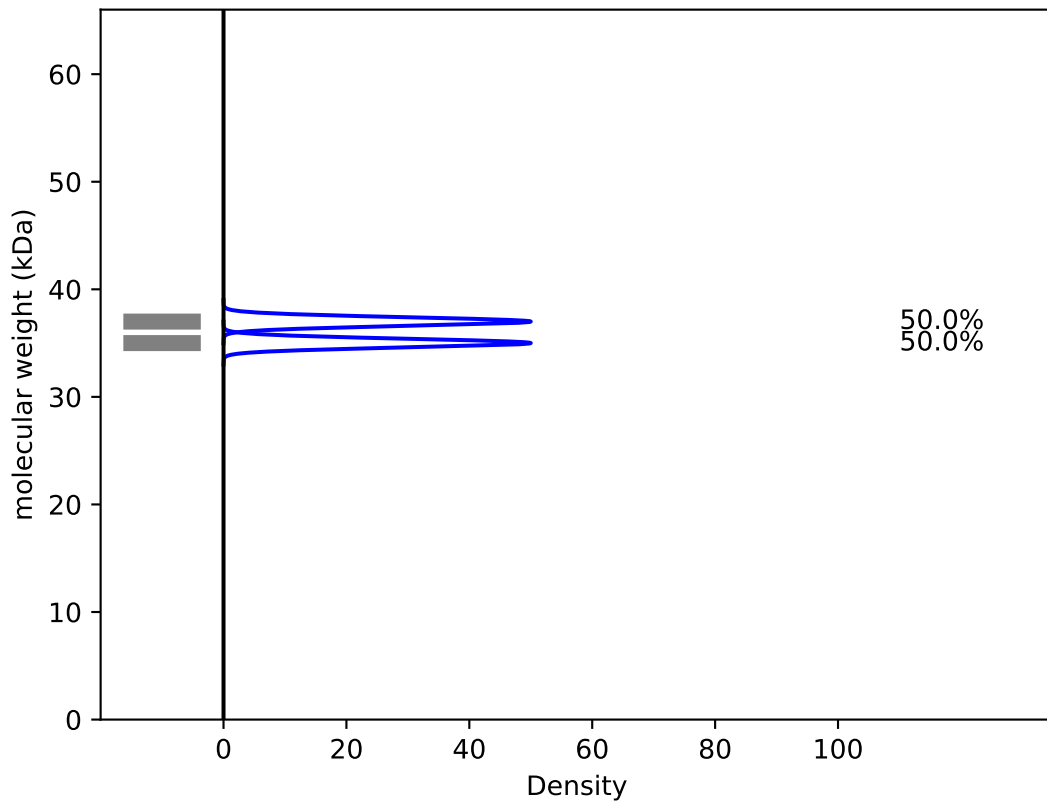

# P46776

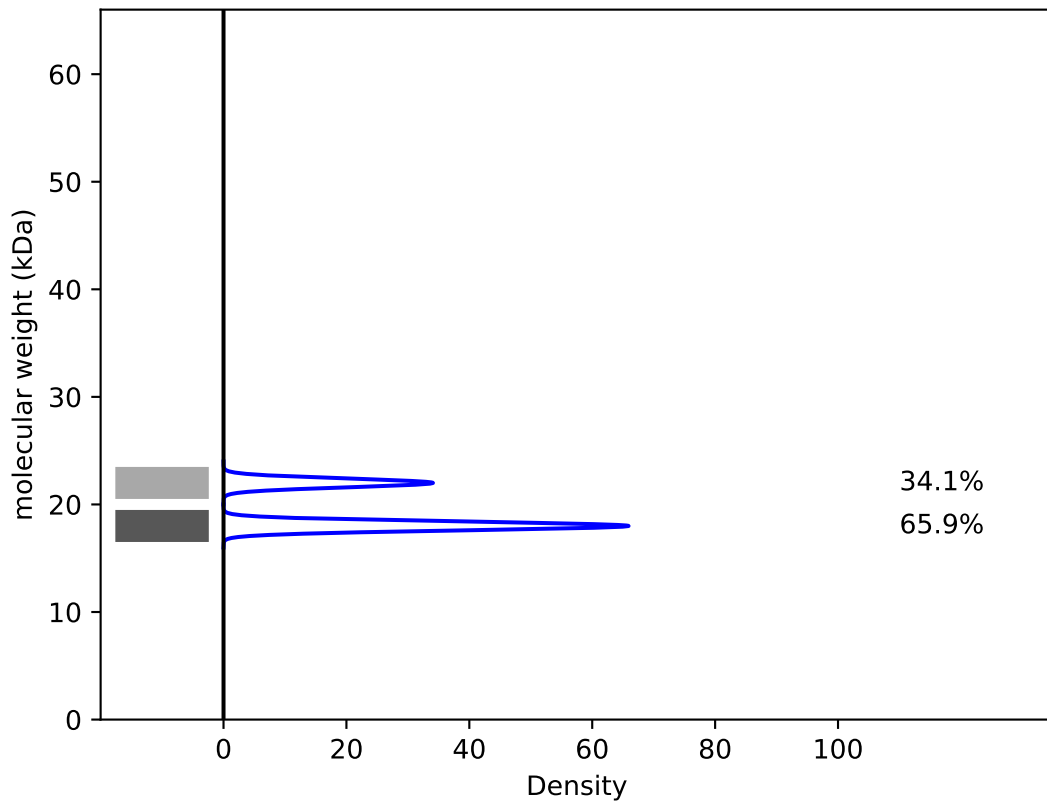

P46777



# P46778

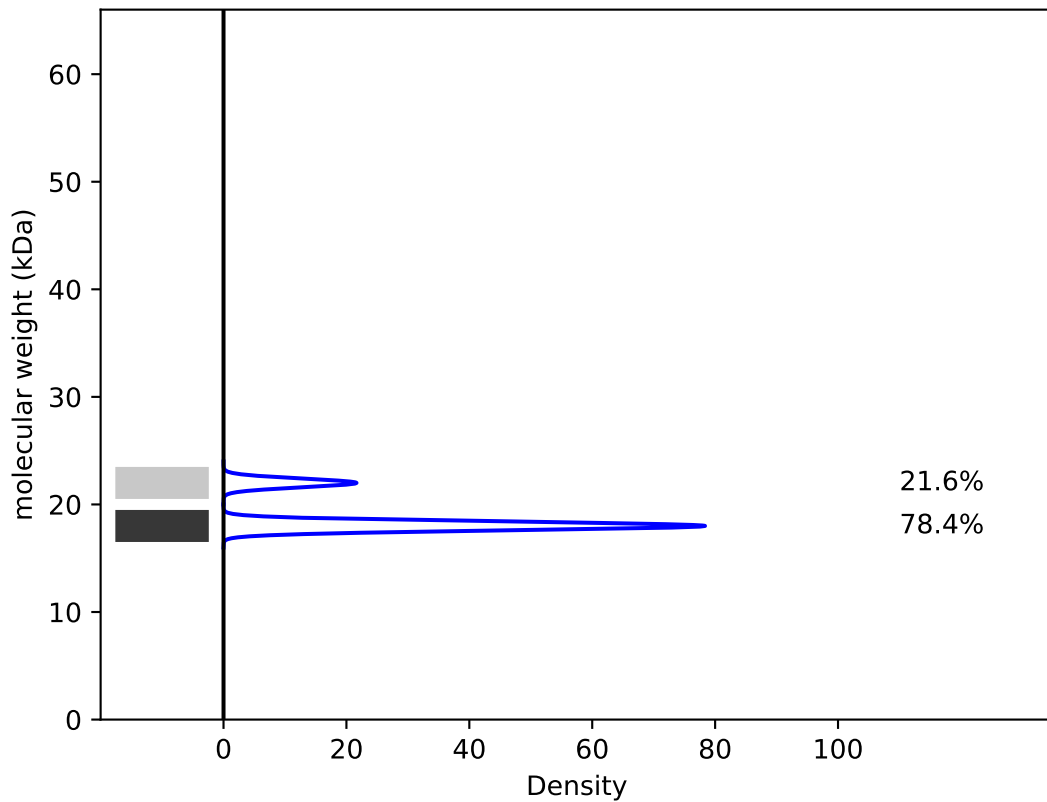

# P46779

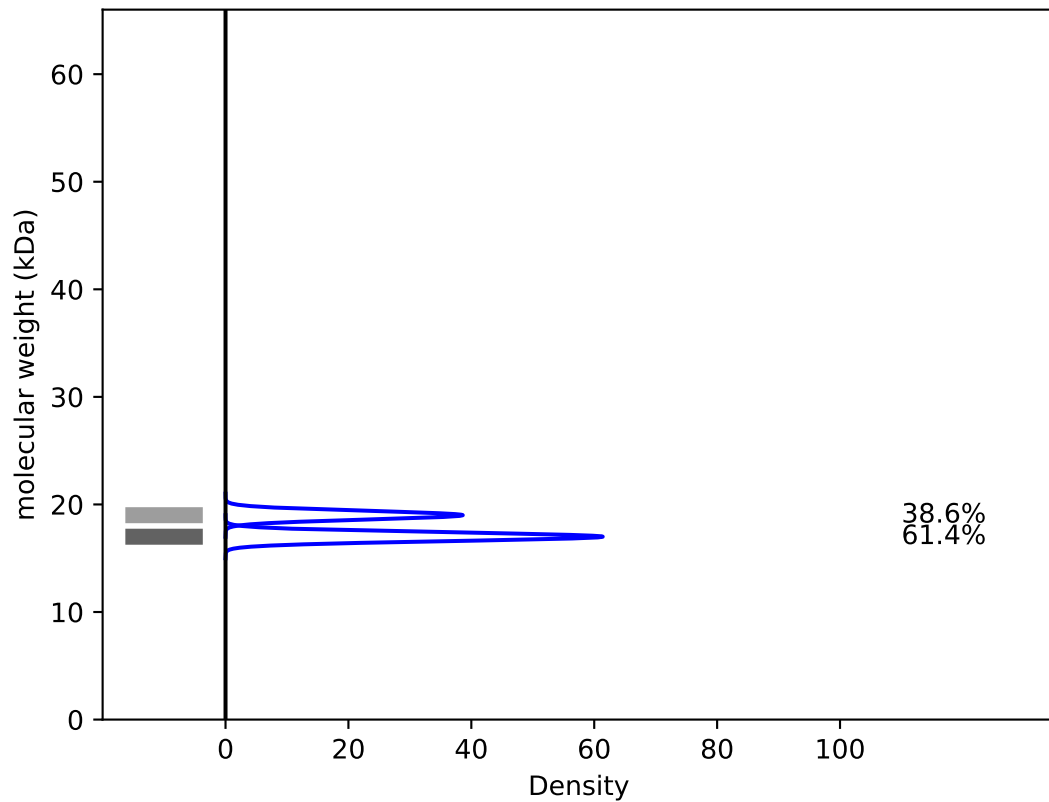

# P46781

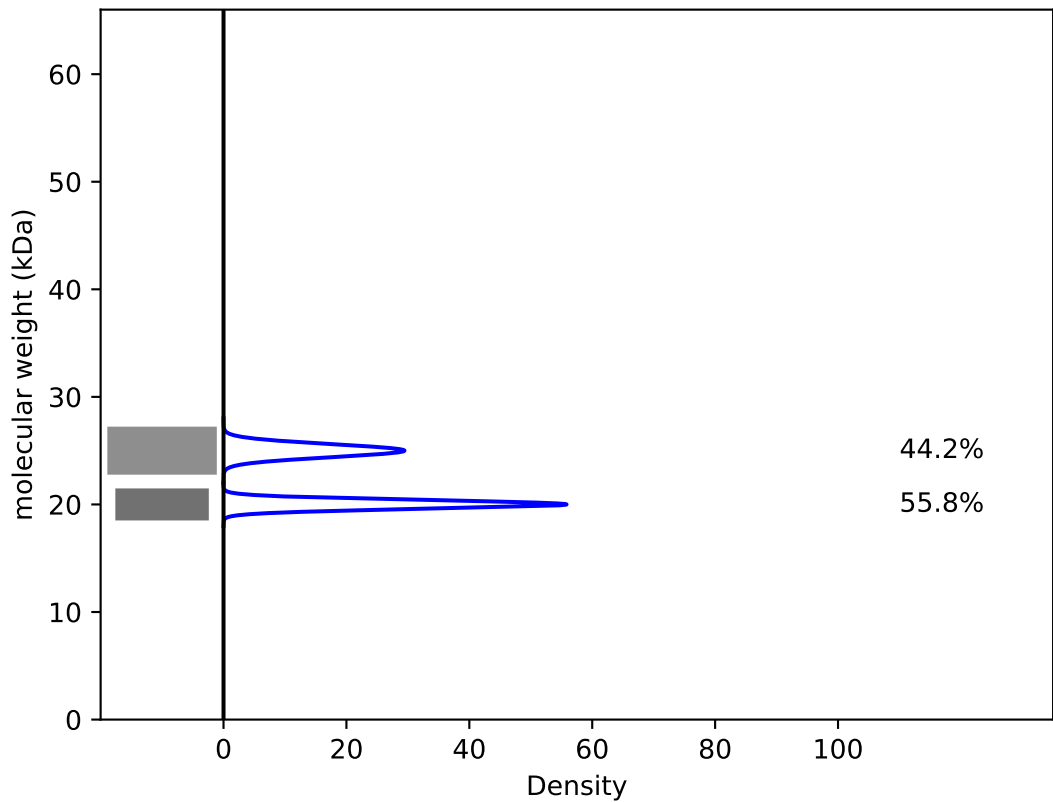



# P46782

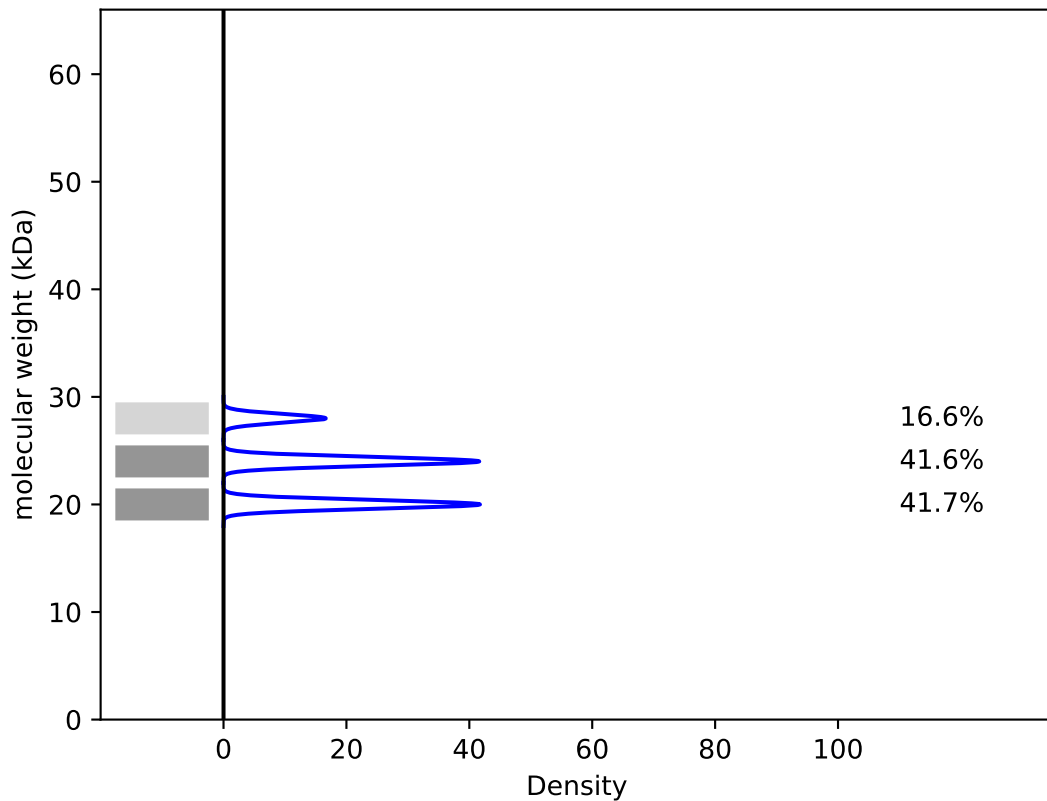

P46783



P46926



# P47755

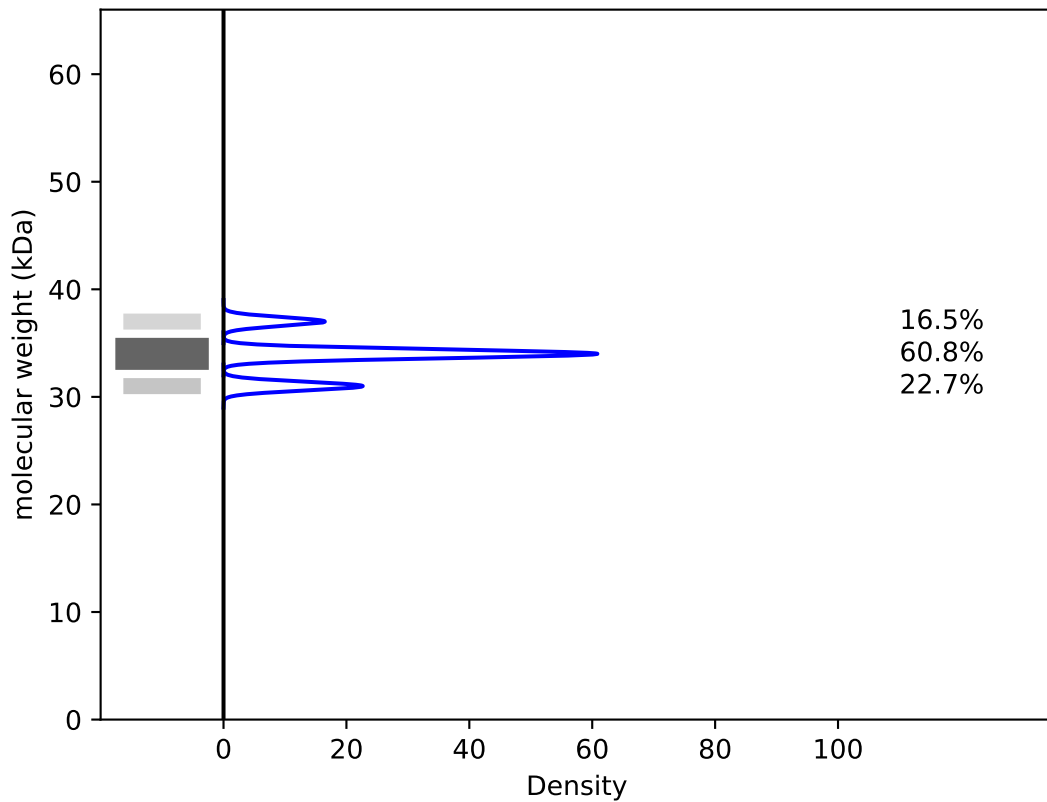

# P47756

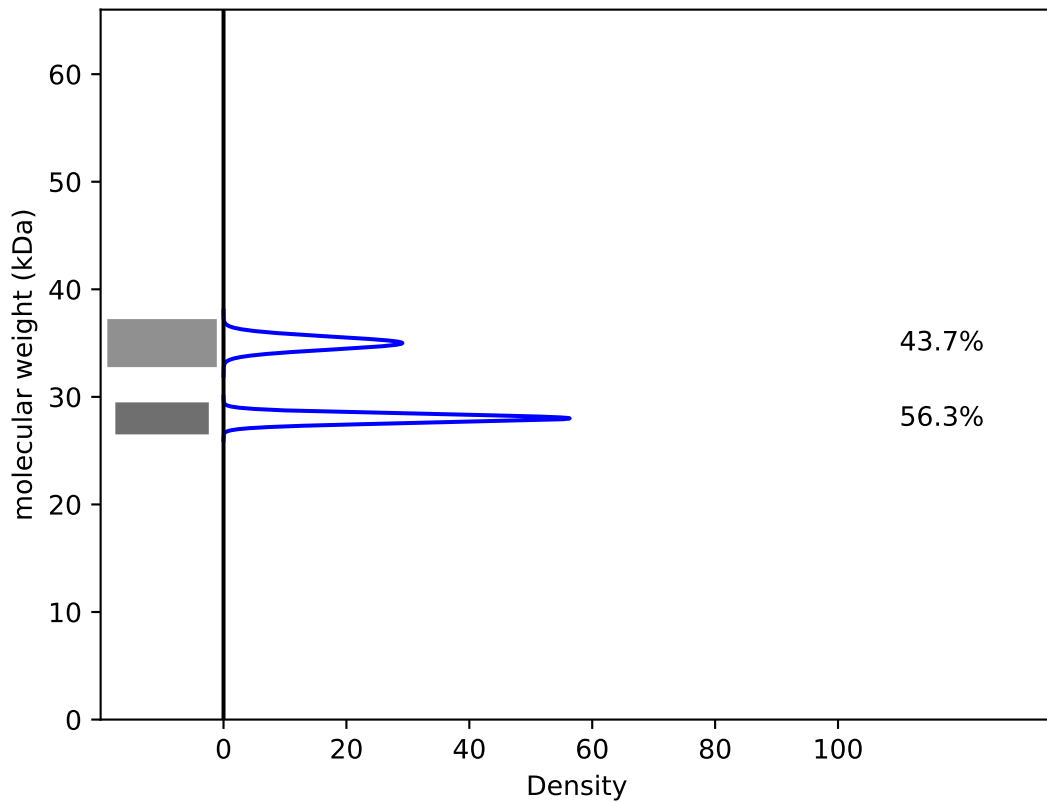

# P47813

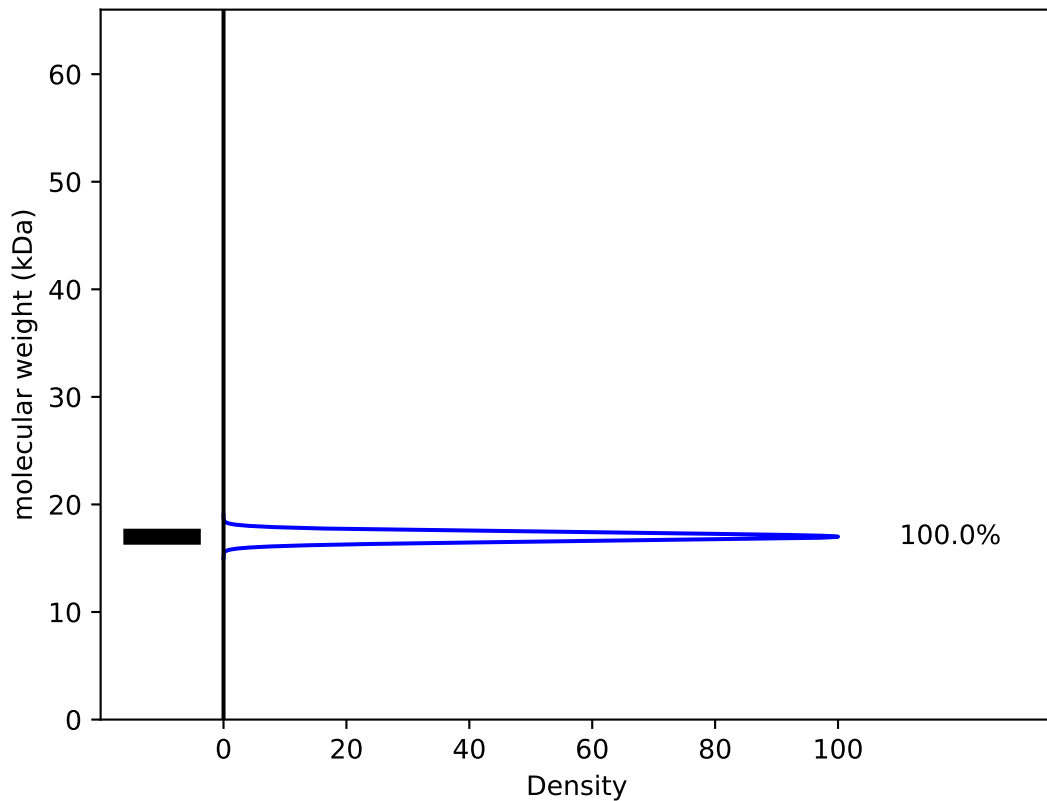

O14602



P47914

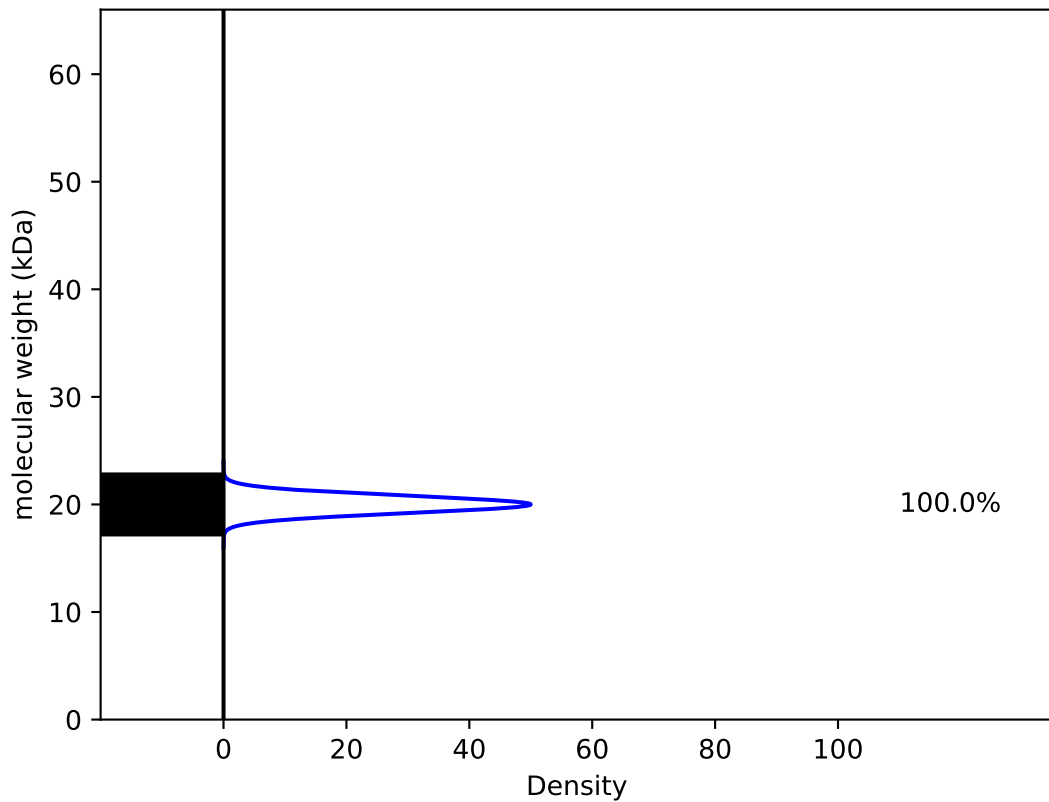



P48047

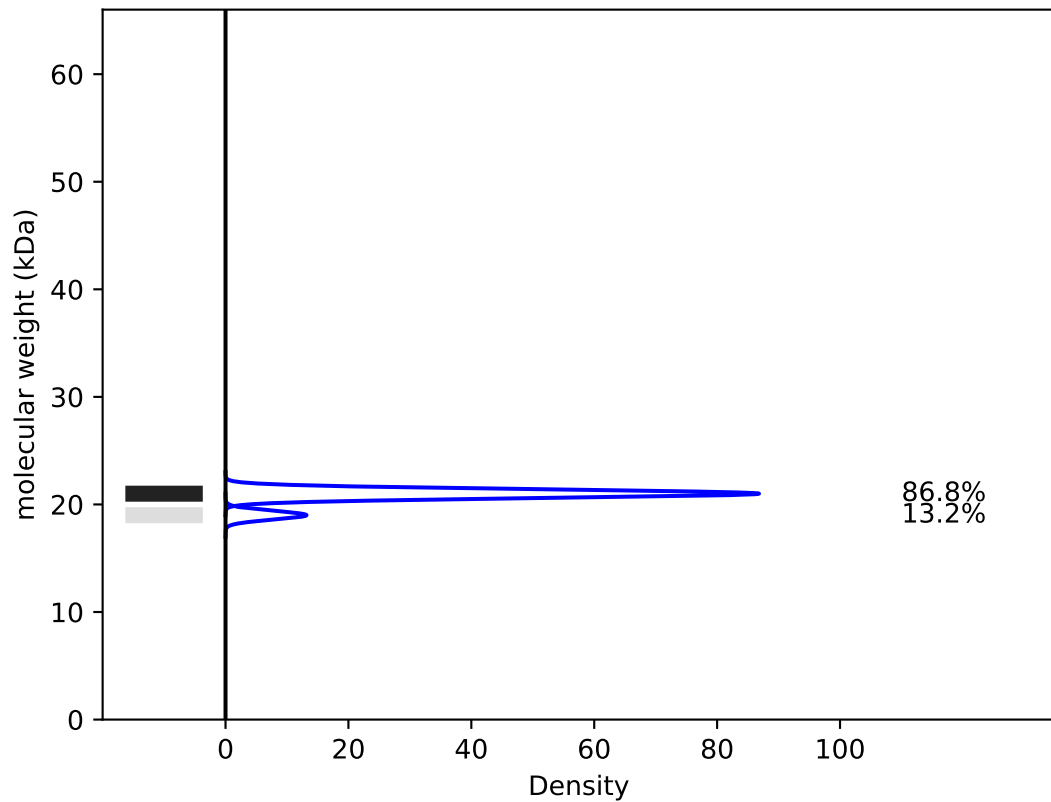

# P48444

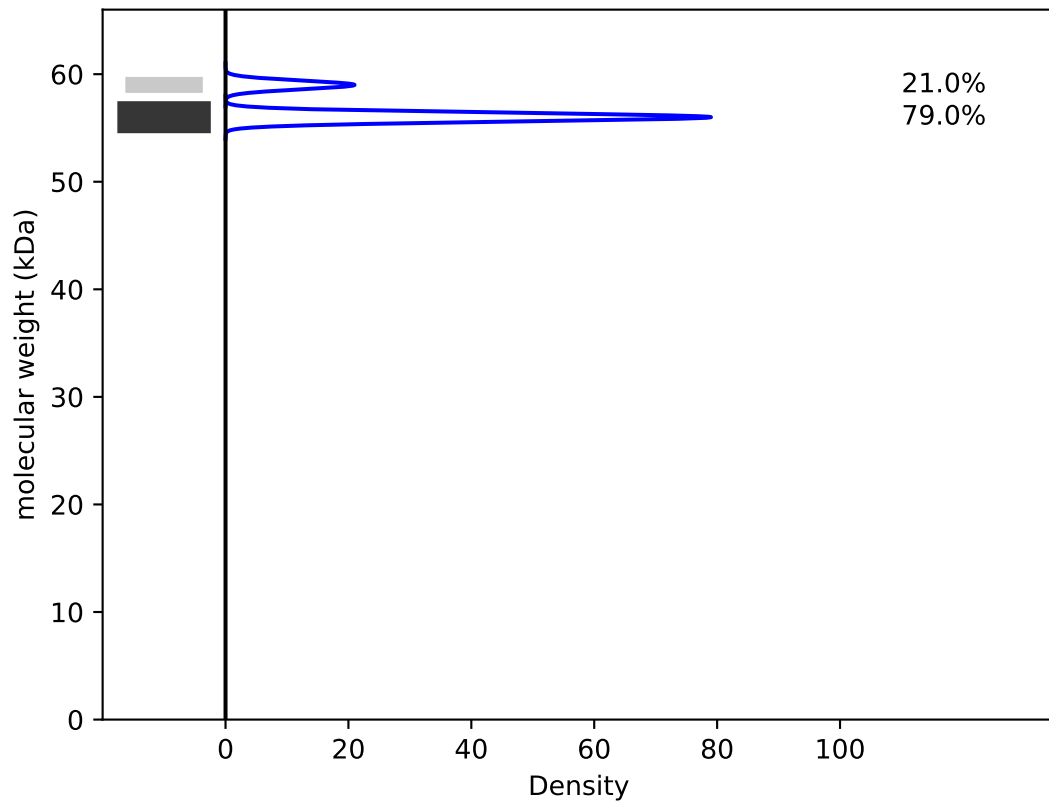

# P48637

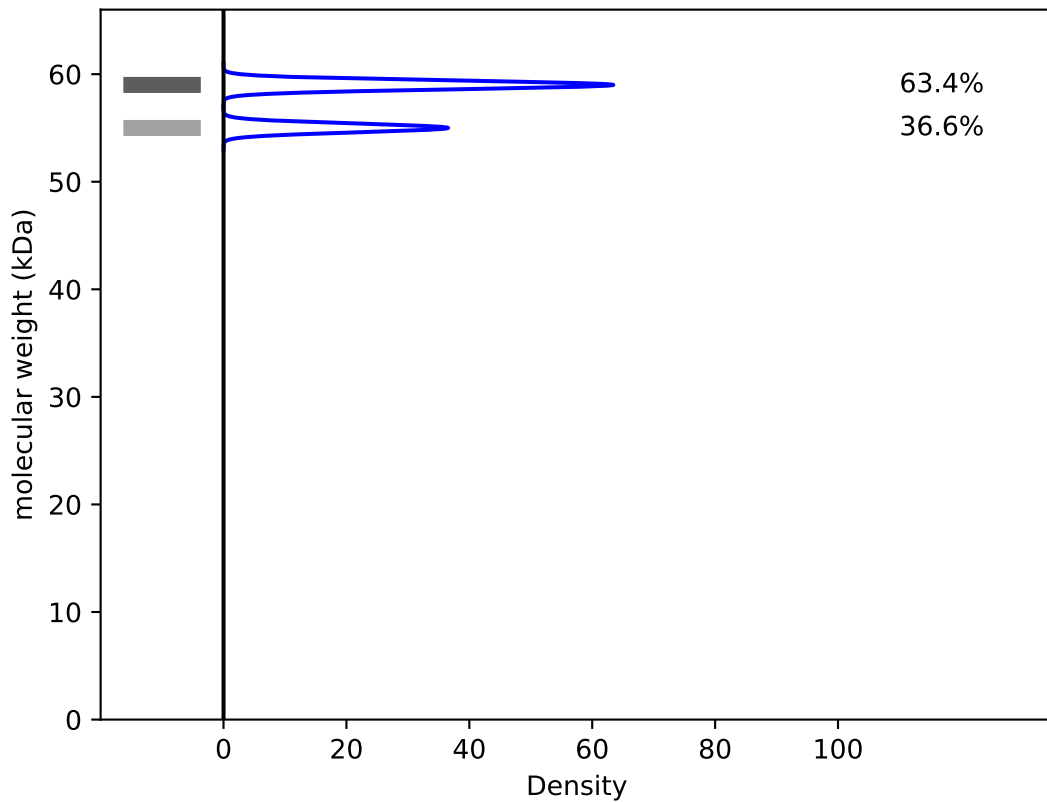

P48643

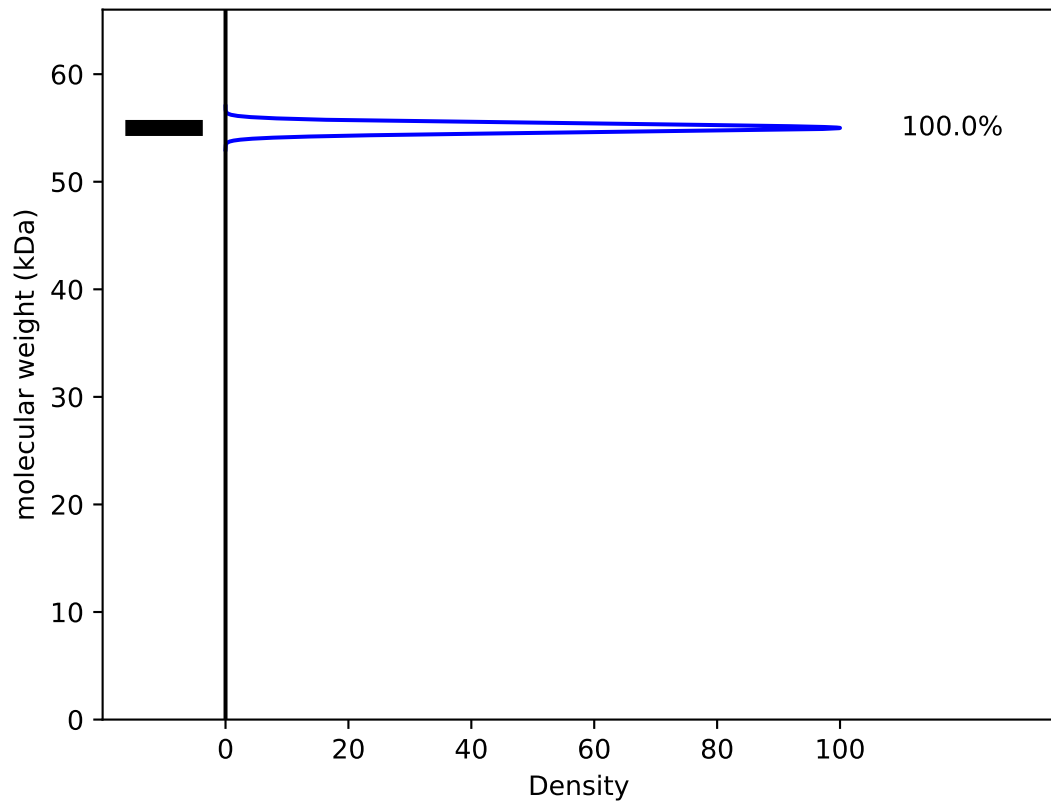

P48729



# Q8N752



P48739

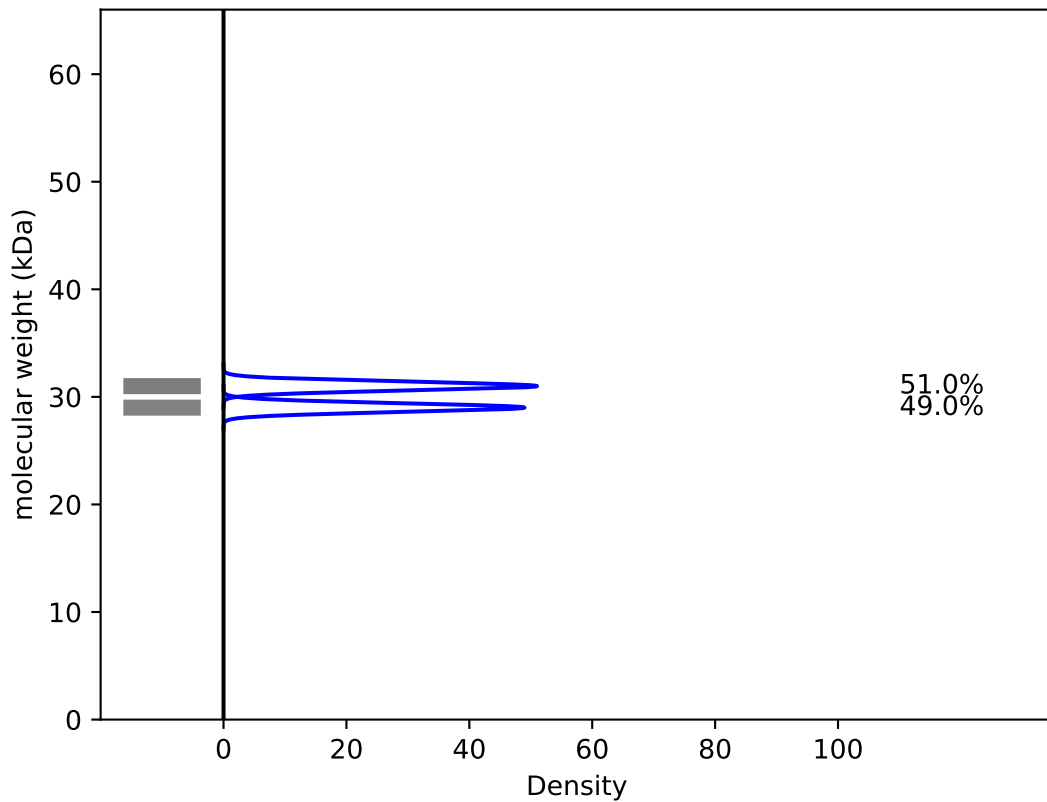

P49005

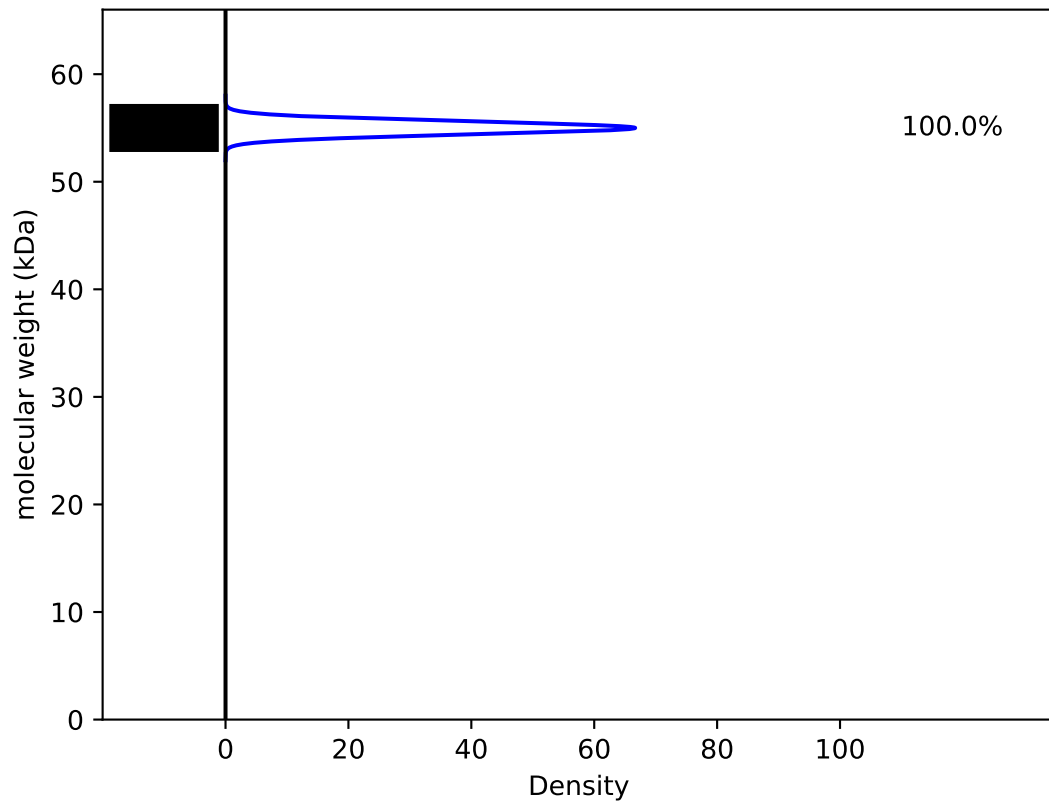



# P49189



P49207

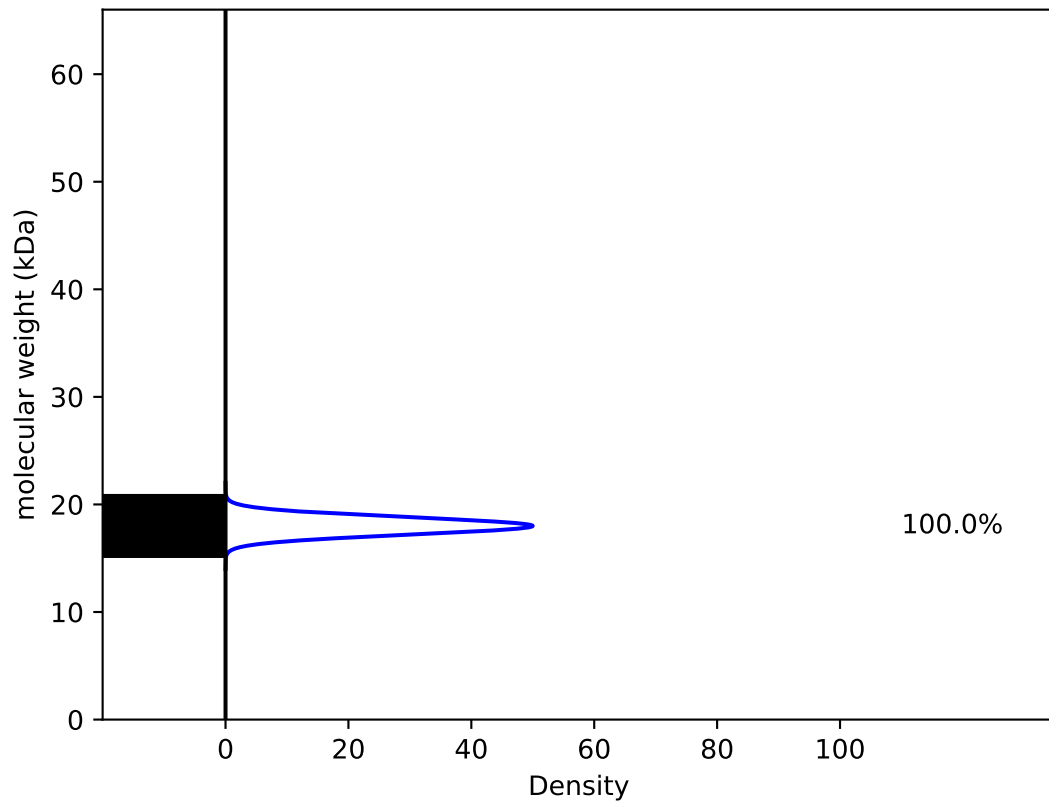

P49257



P49354



# P49368



P49406

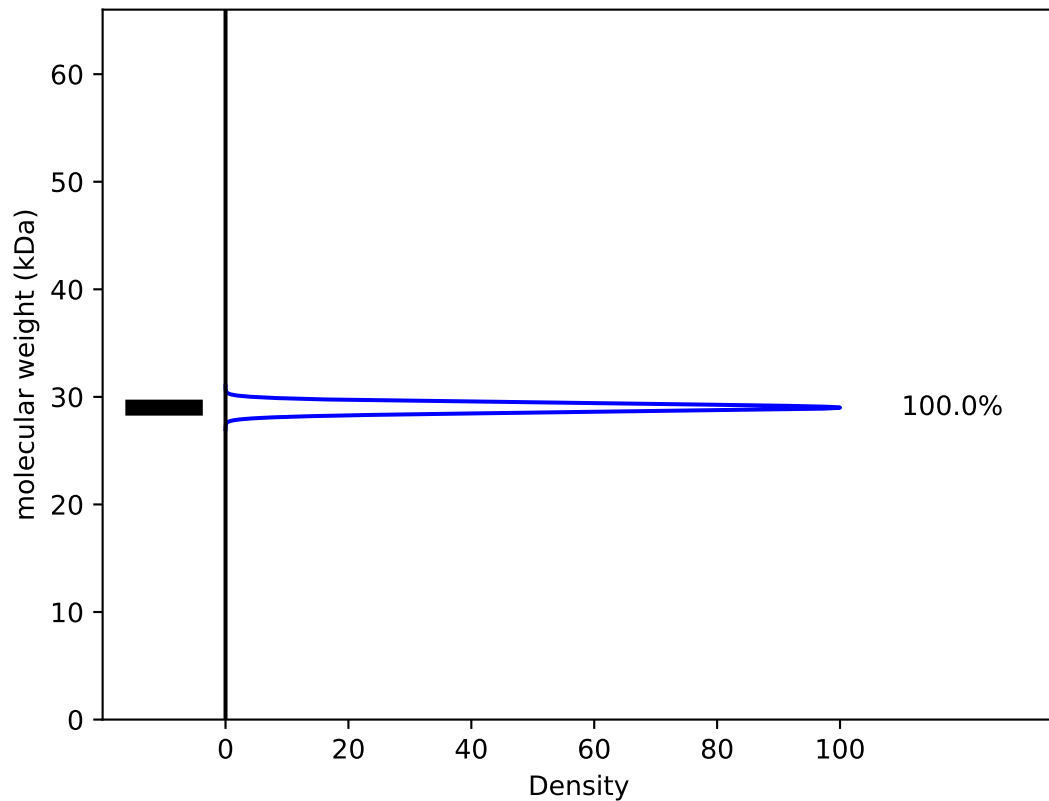

# P49411

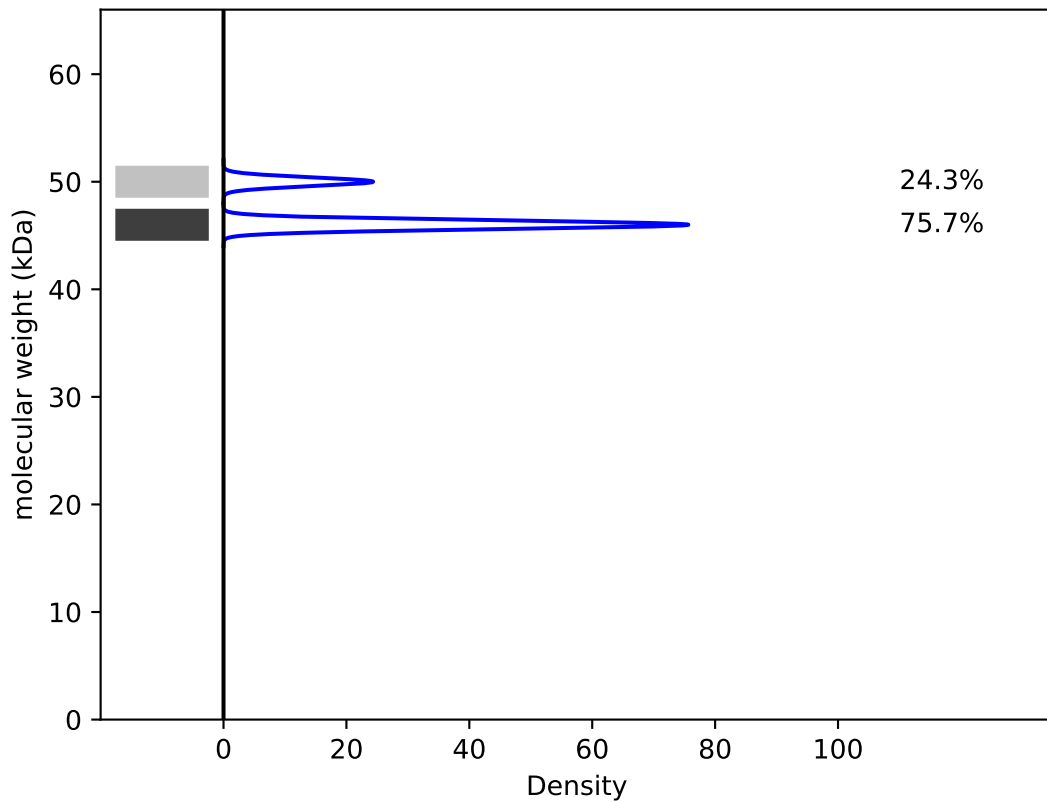

# P49419





# P49590

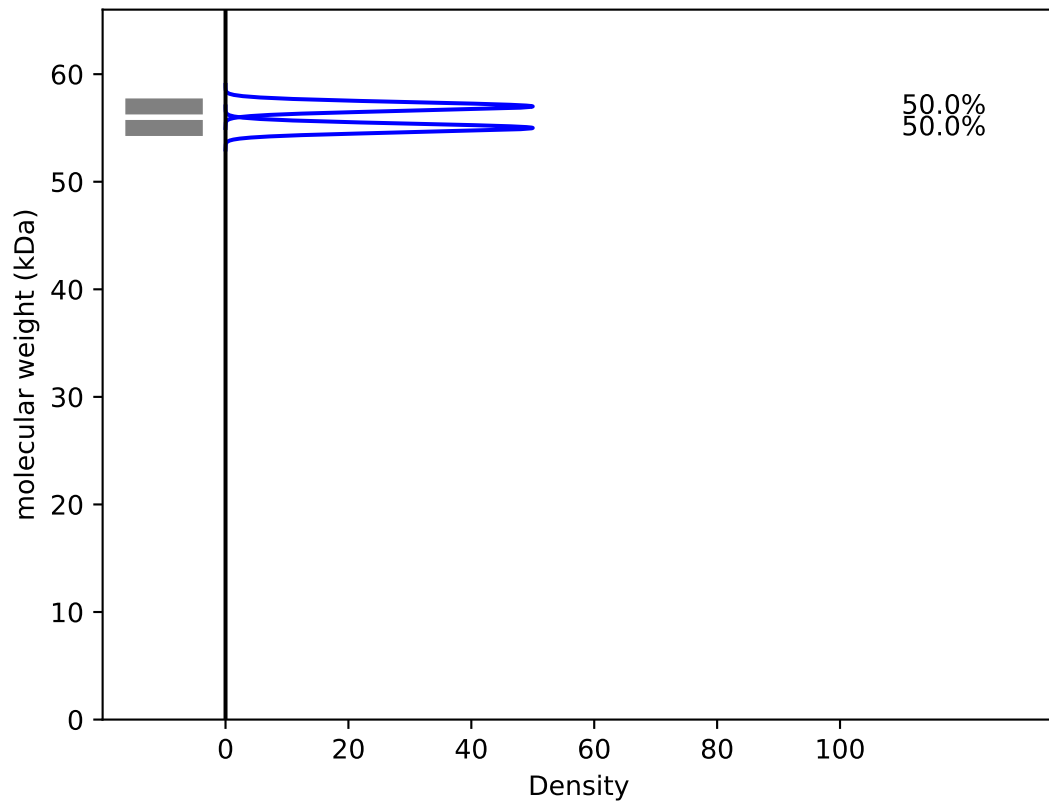

P49591



P49643



# P49720



P49721



# P49770

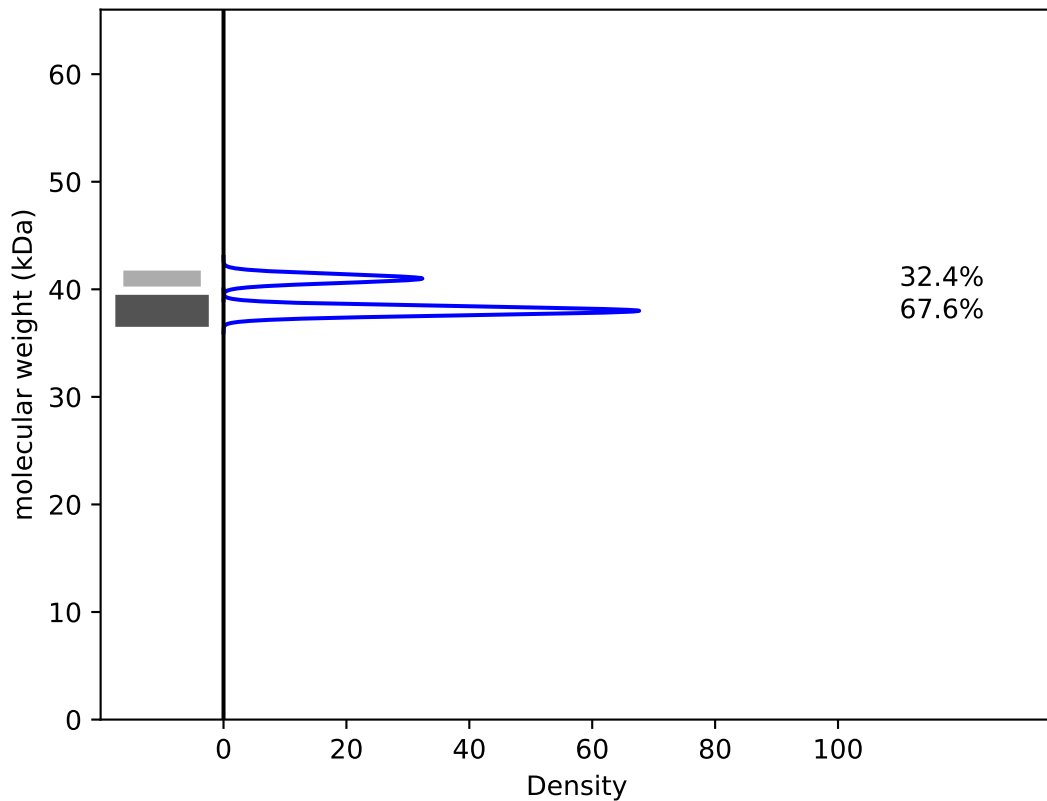

# P49841



# P49903

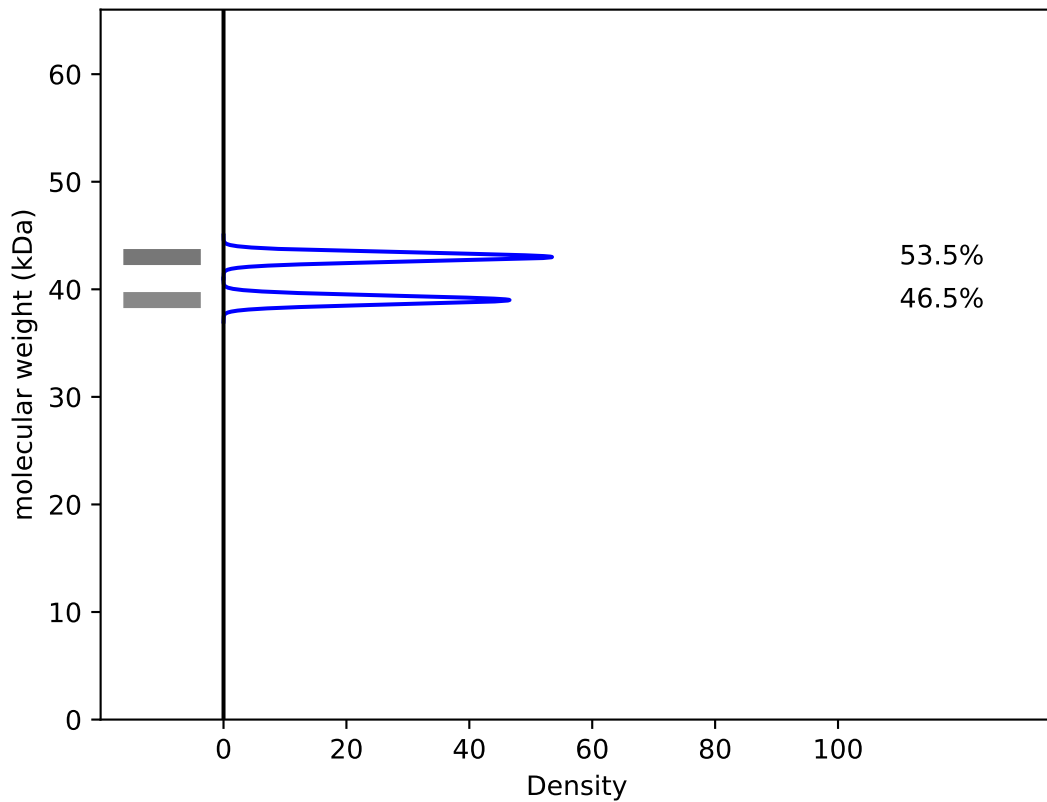



P49914



# P50213

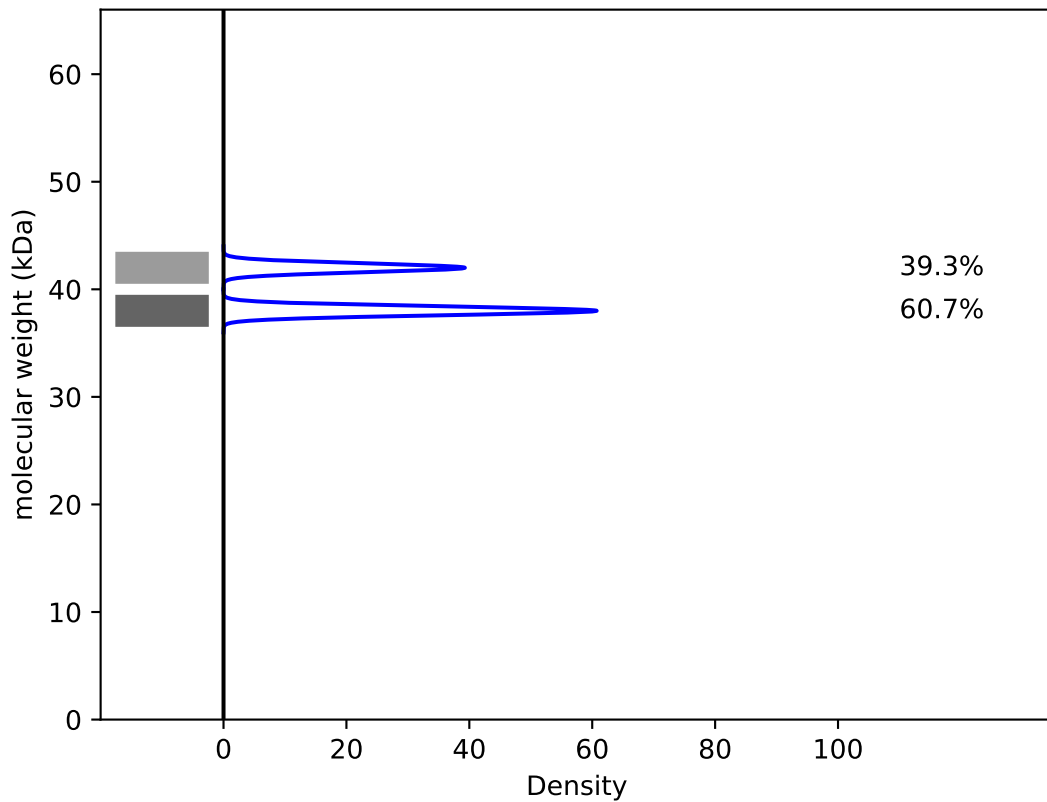

P50402



P50454



# P50502



# Q8NFI4



# P50552

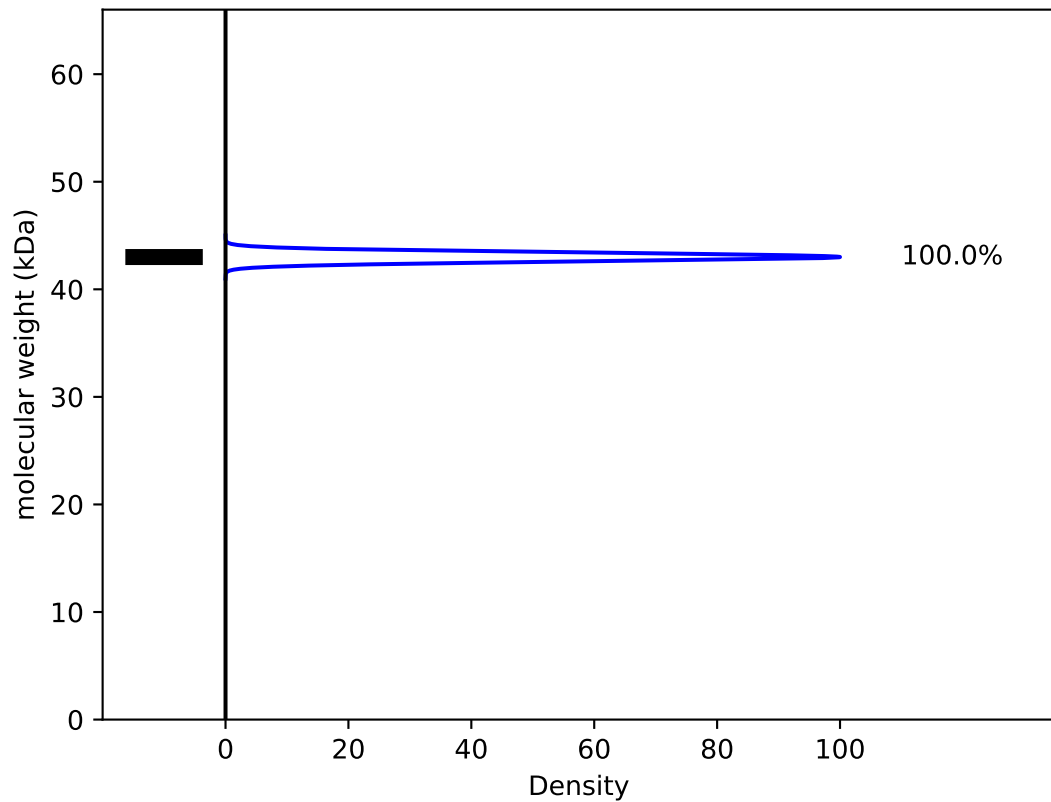

# P50613

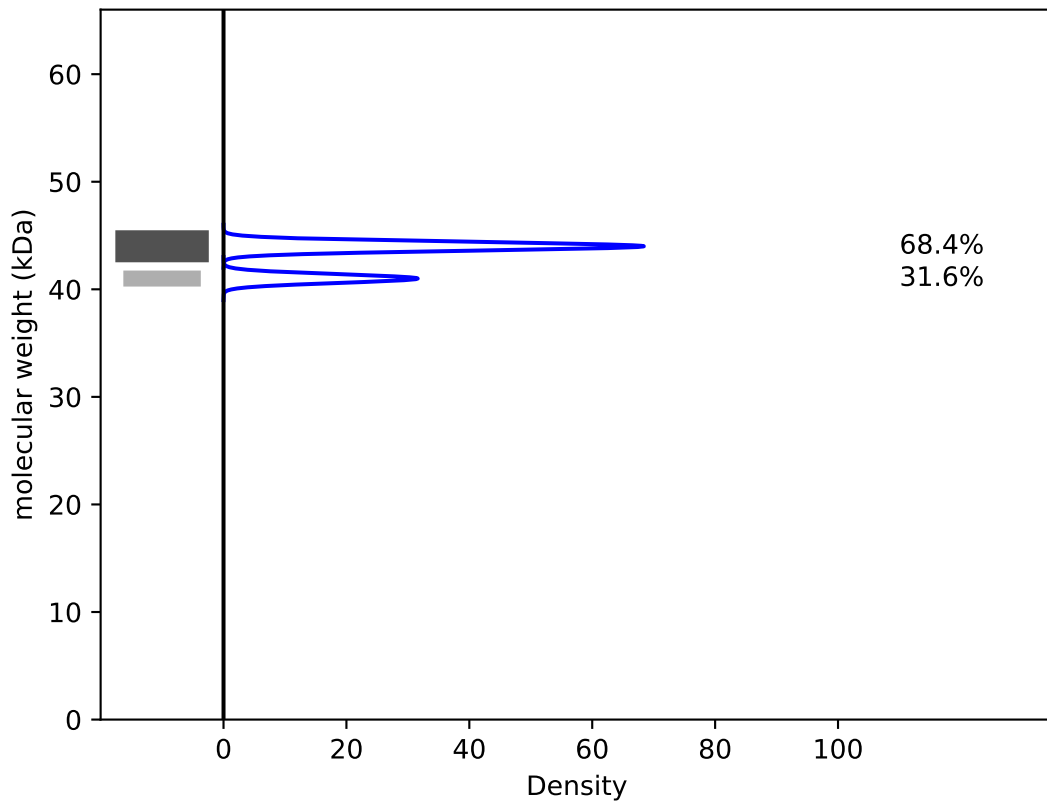



# P50750



P50897



P50914



# P50990



# P50991

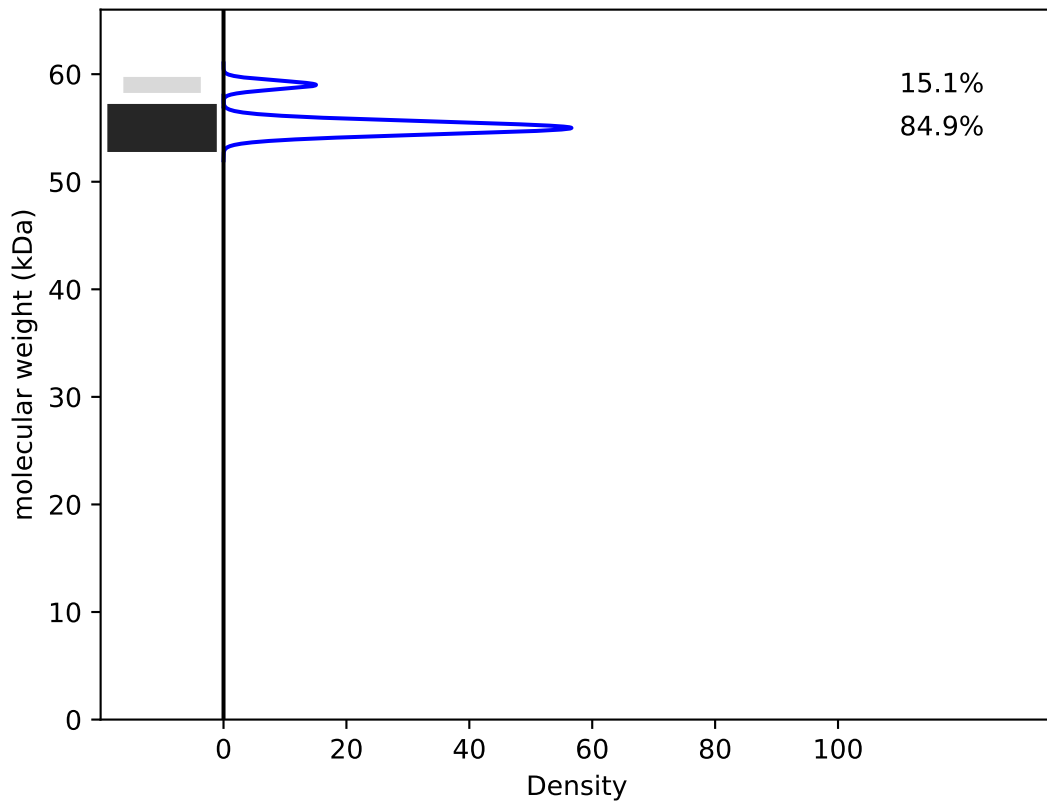

# P50995



# P51148

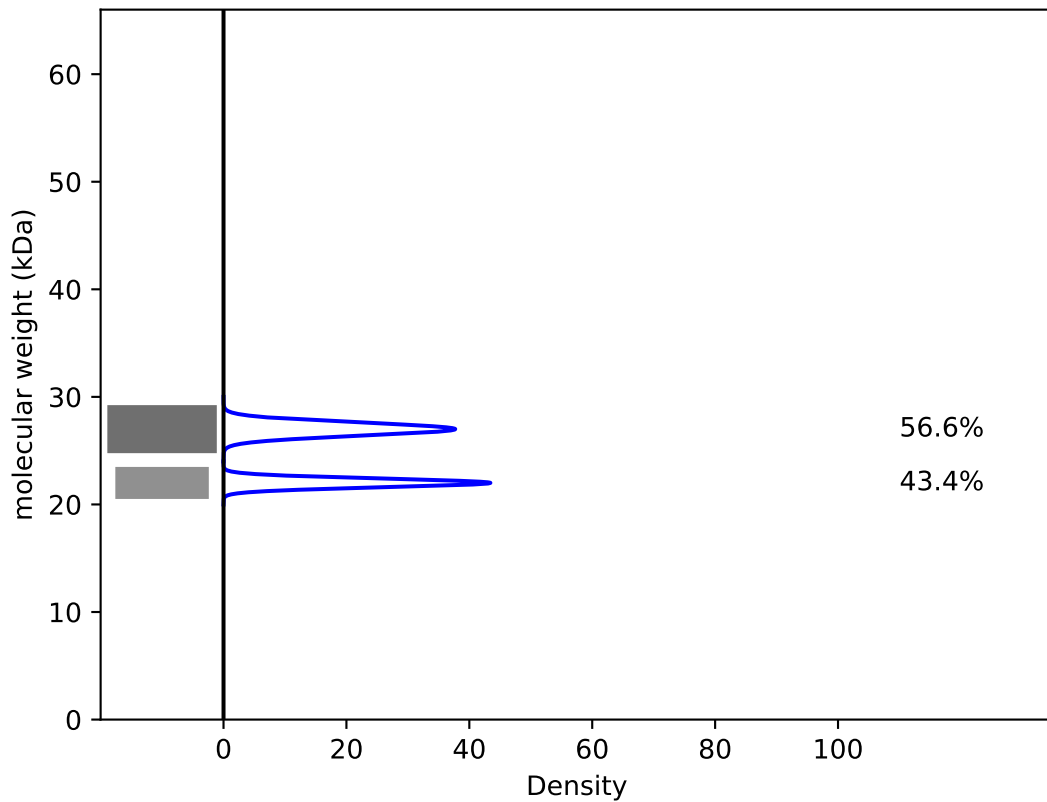

# P51149

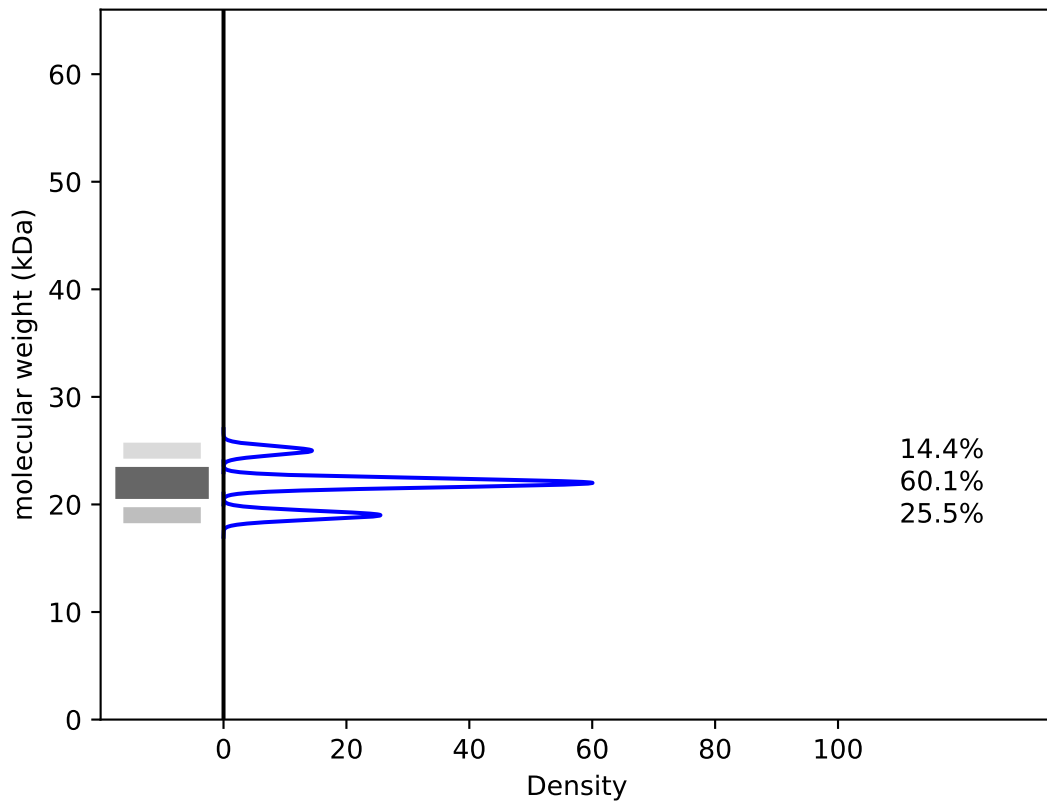



# P51151

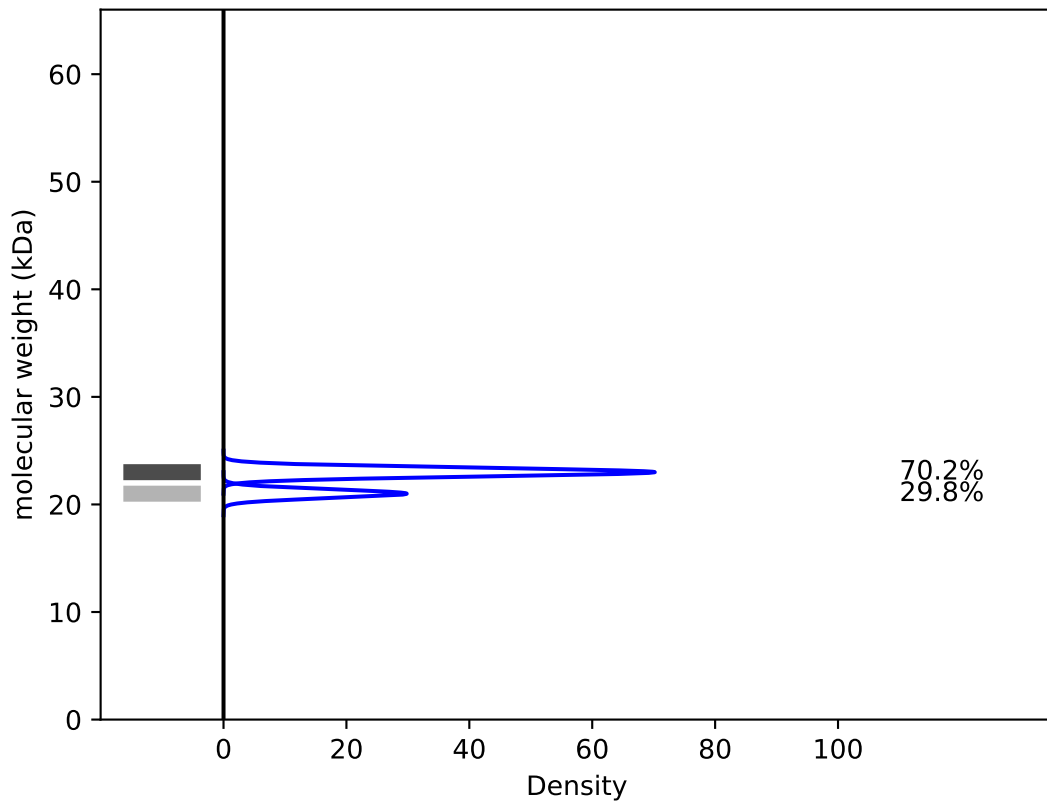

# Q9NP90



# P51398

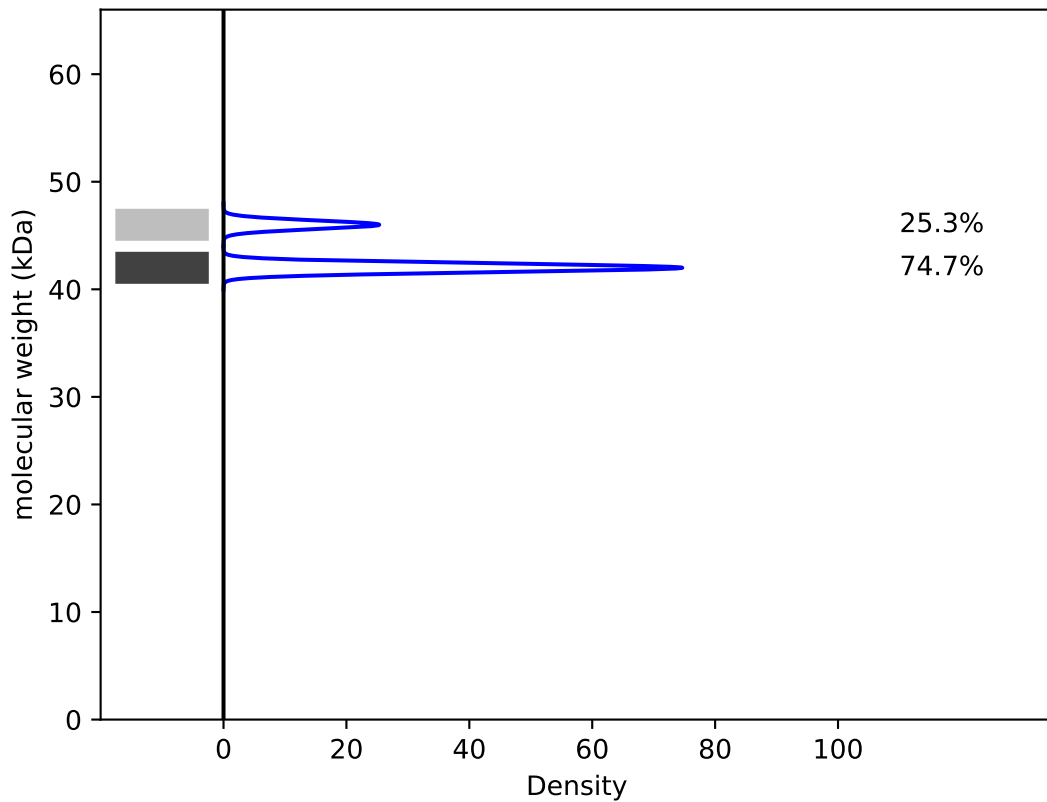

# P51452

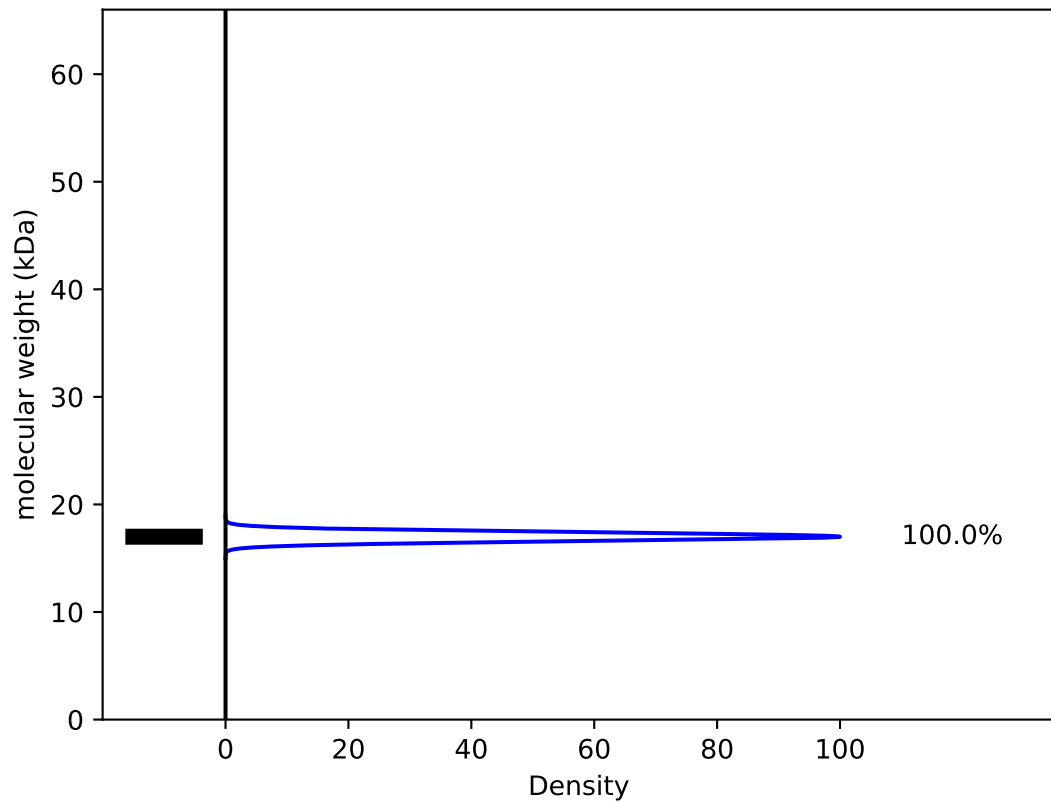

# P51553

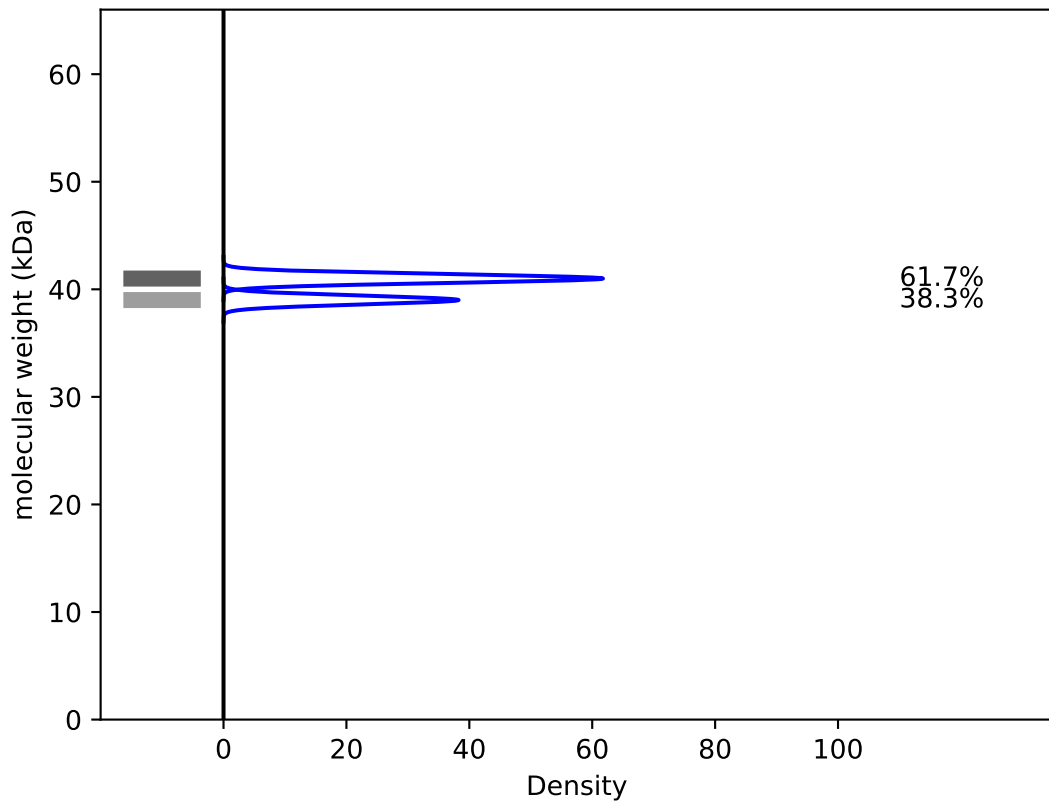

# P51570



# P51571



# P51572





# P51648



# P51649



# P51665



# P51991

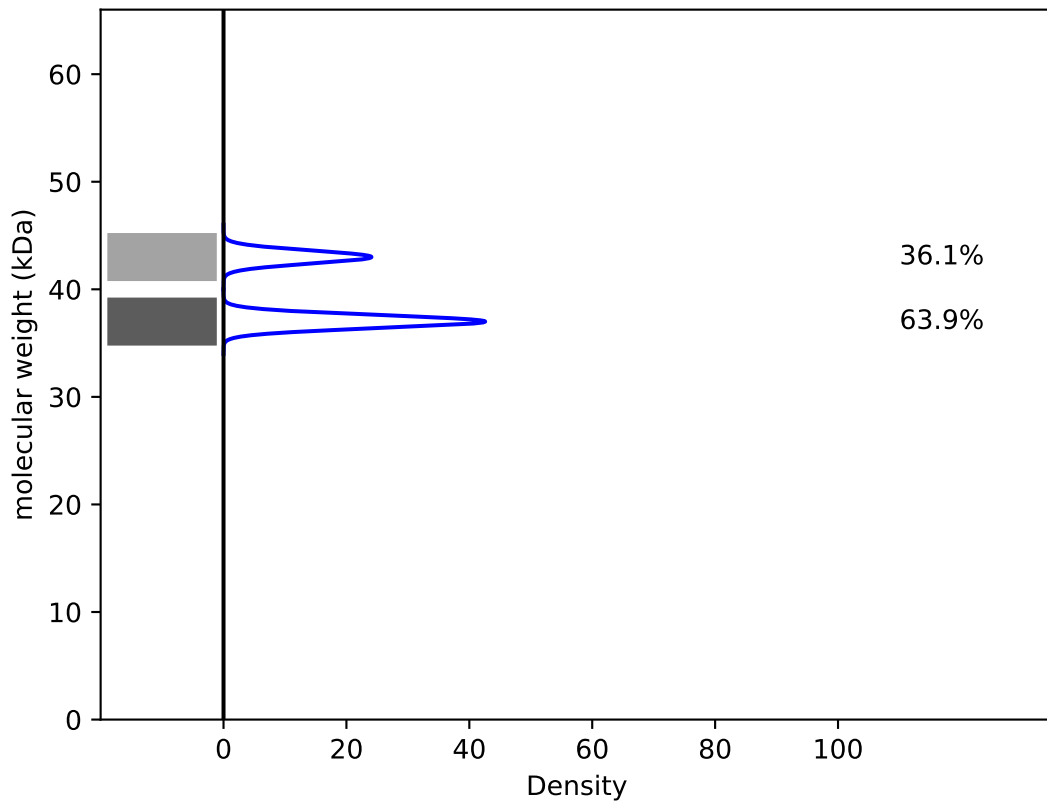

P52292



# P52565



# P52597

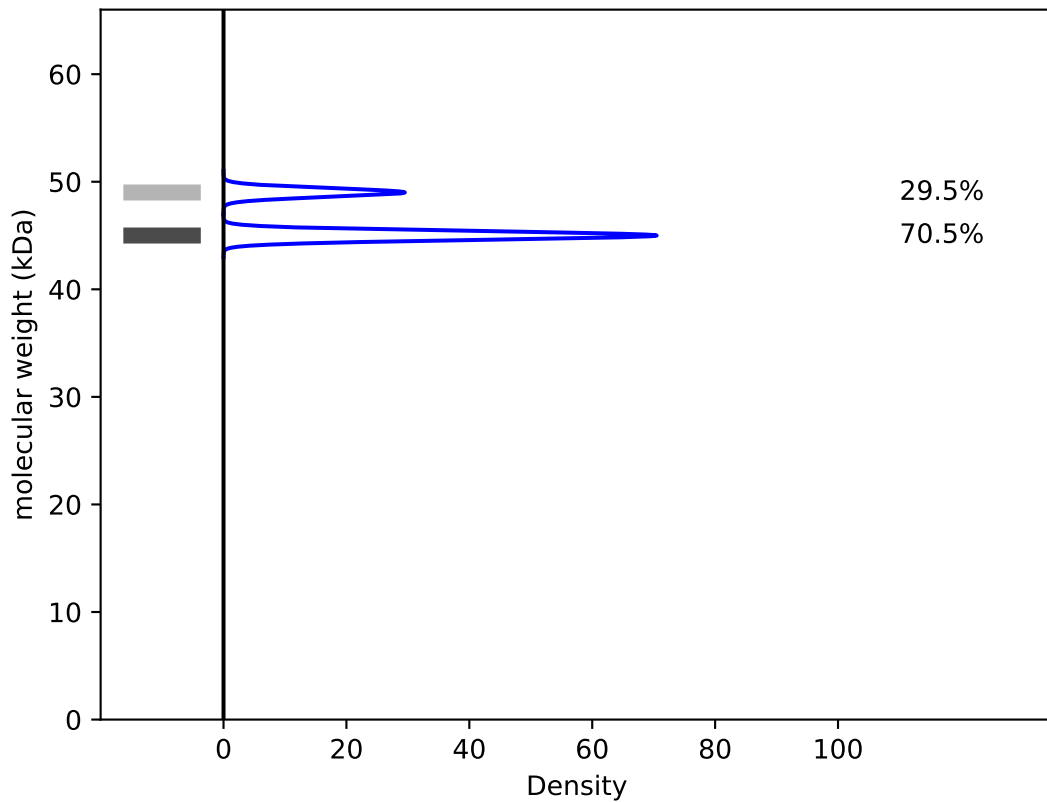

# P52788





# P52815

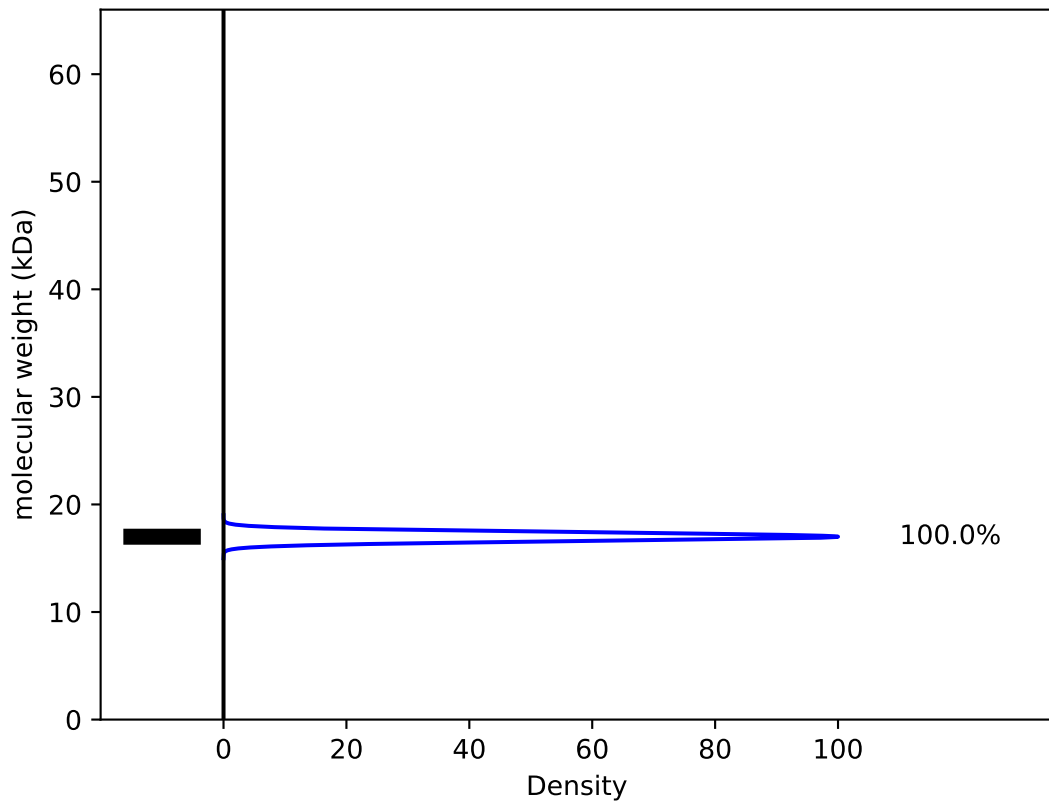

# P52907

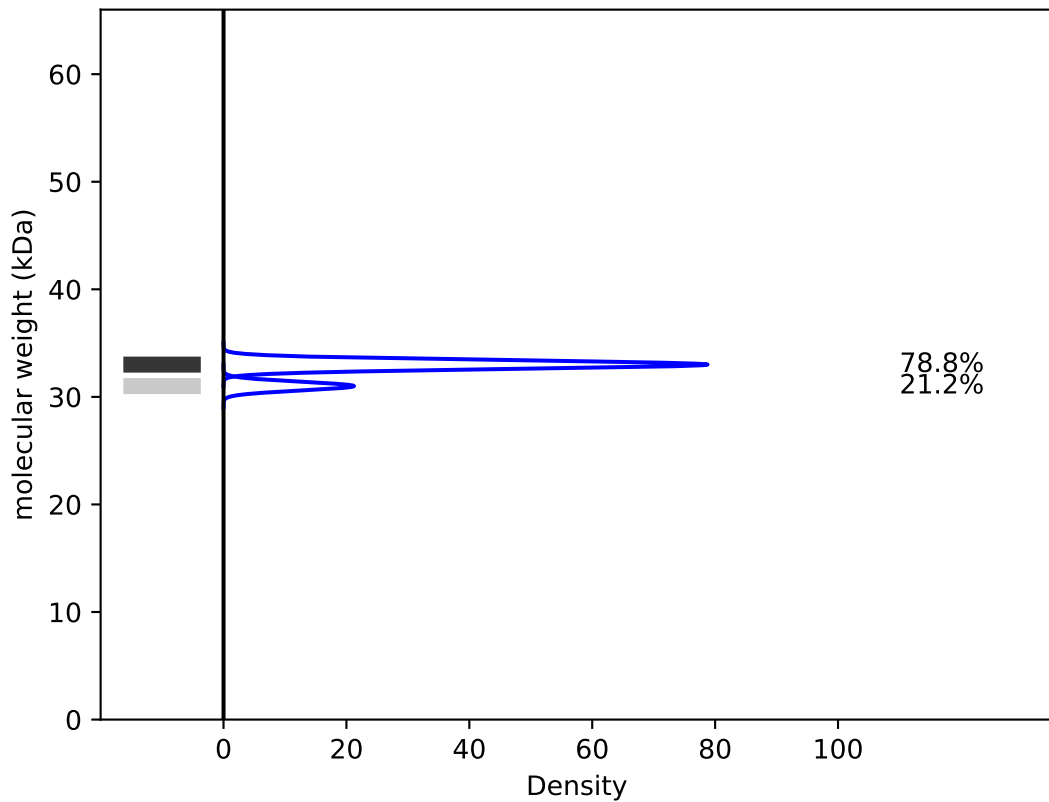

P53004

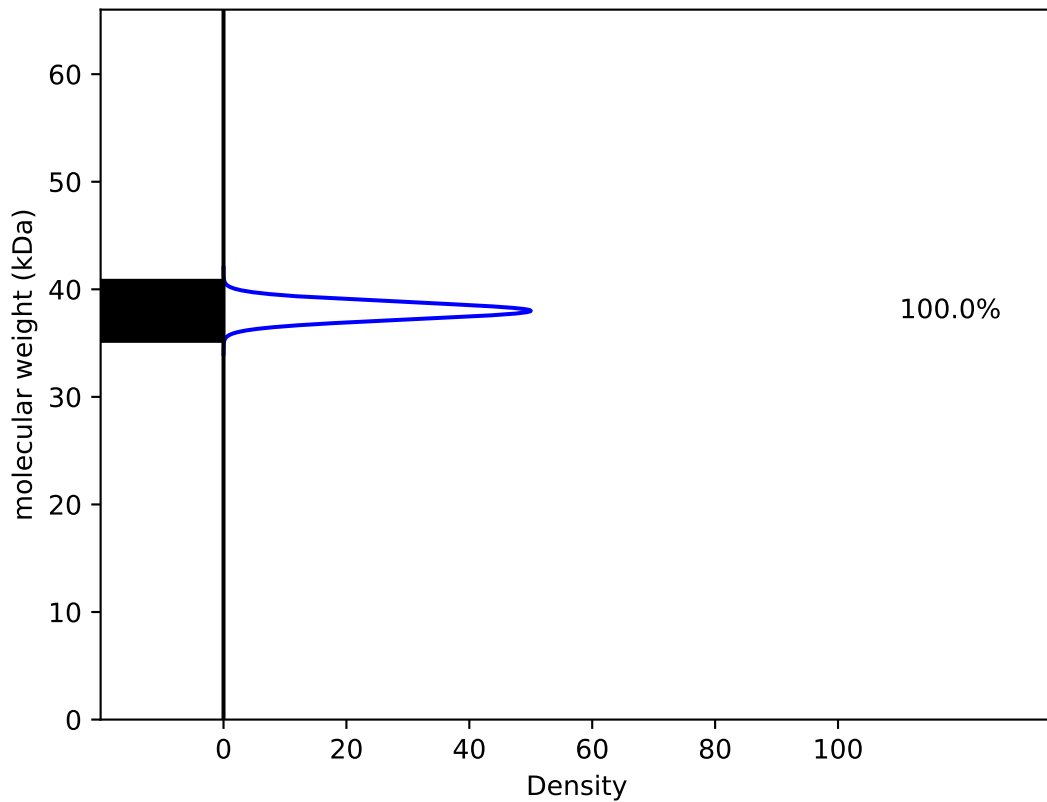

P53007

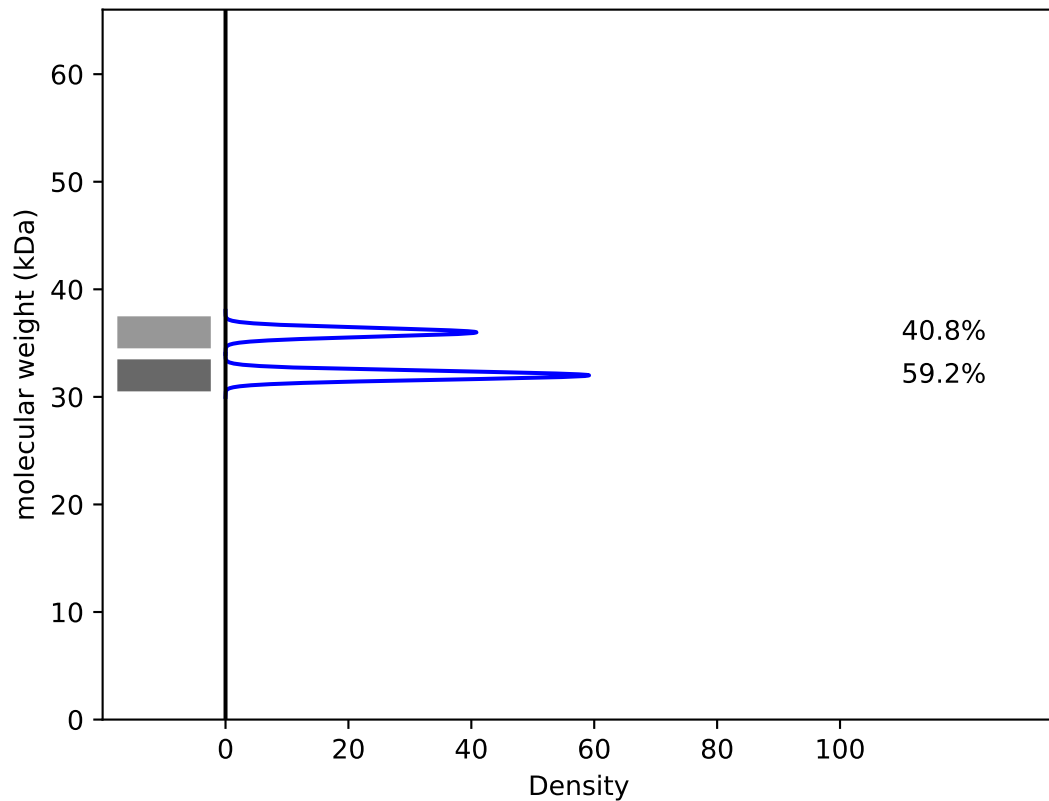

P53041



# P53582

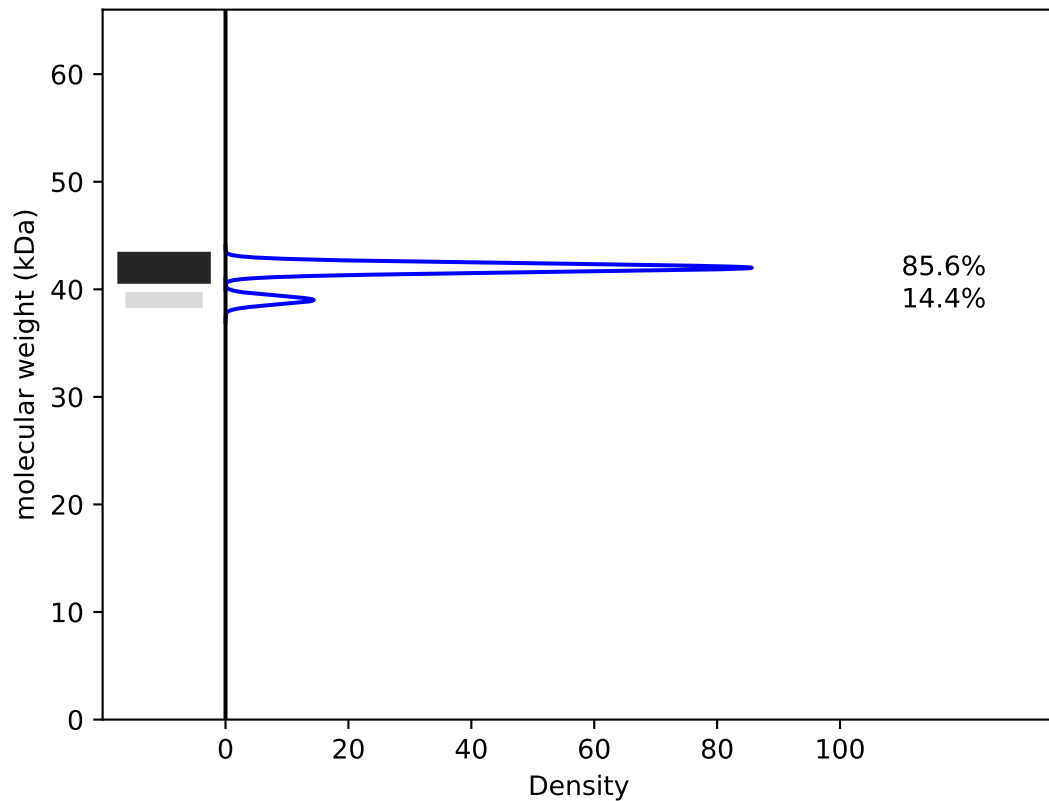

P53701



# P53990





P54577



# P54578

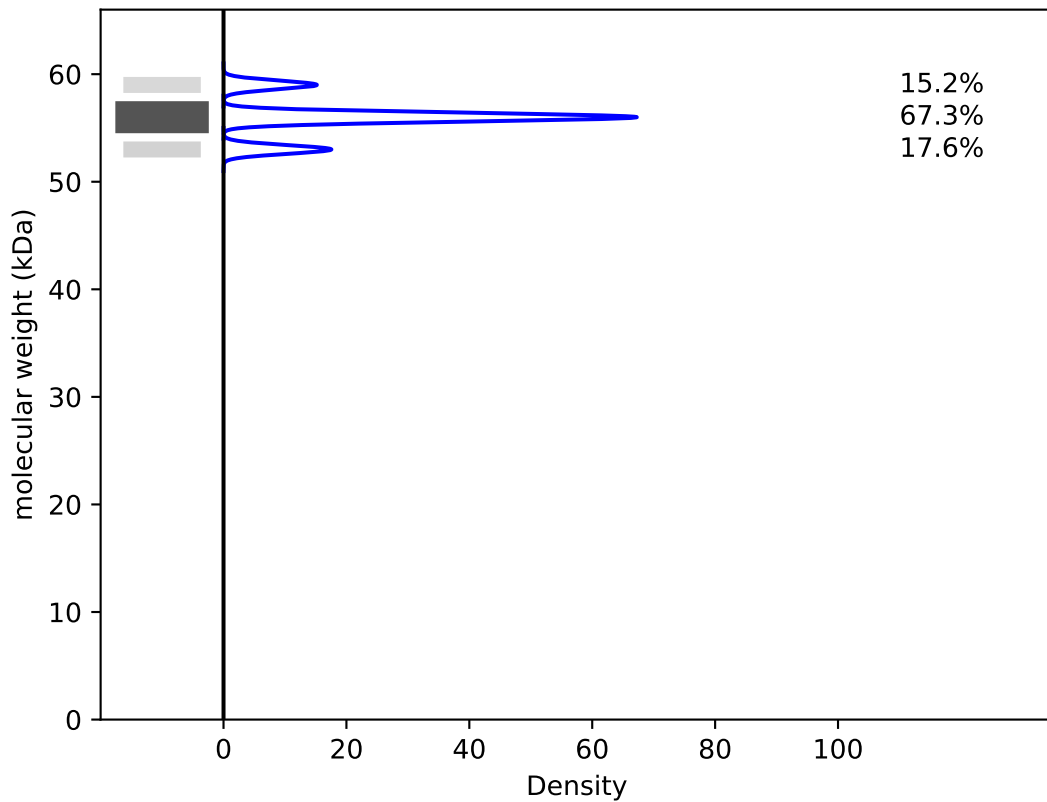

# P54619

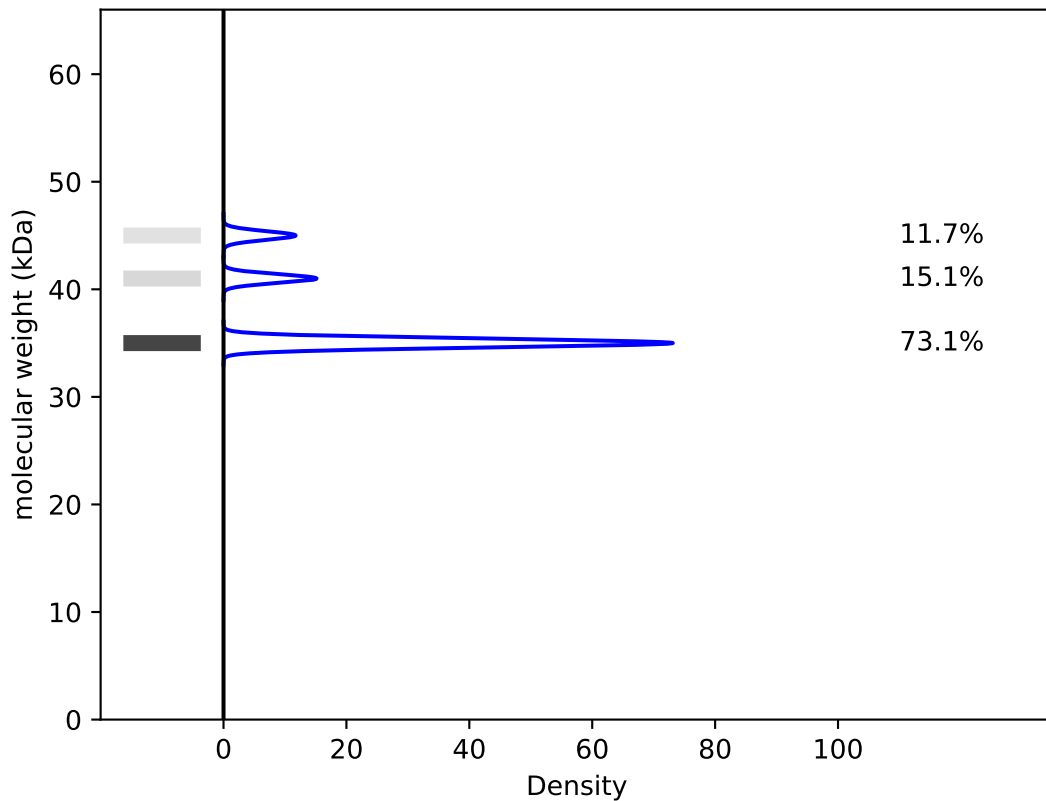

P54709

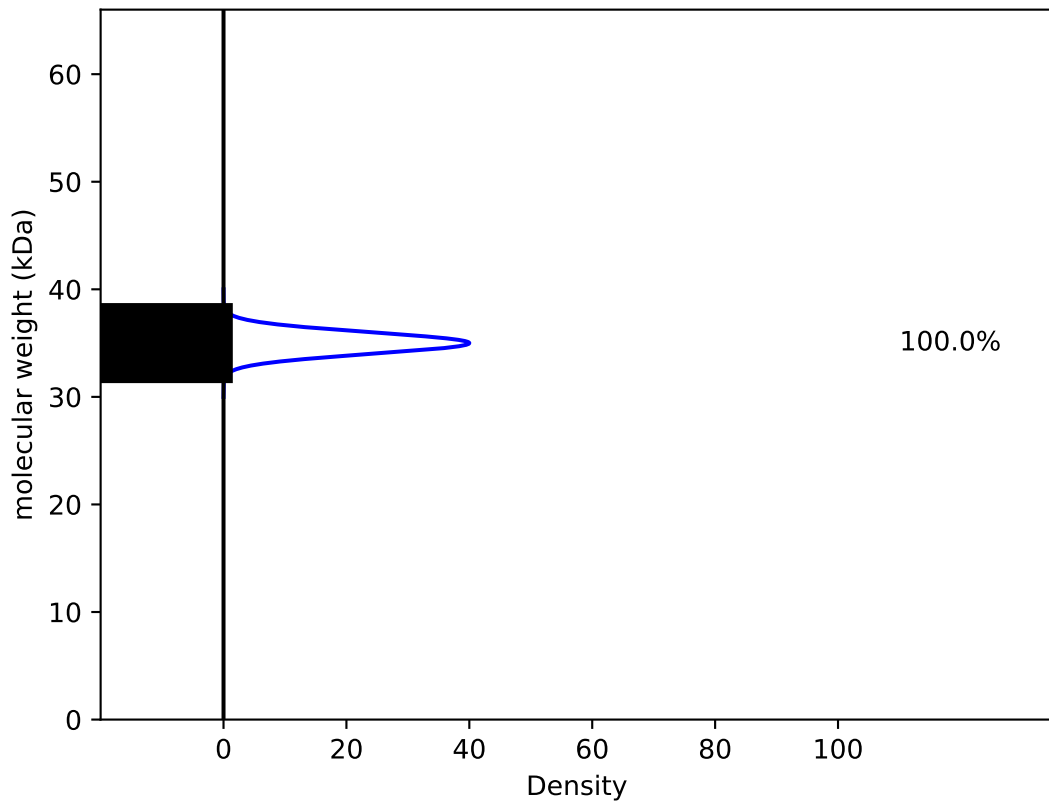

# P54819



# P54920

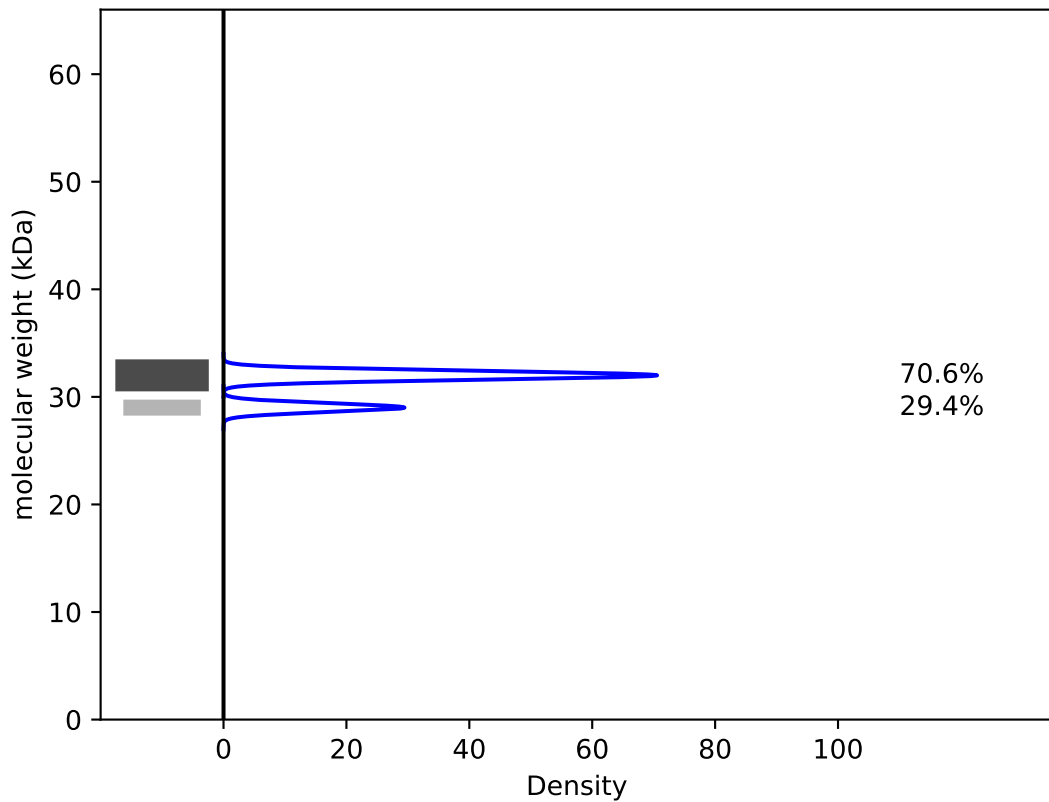

# Q9H115

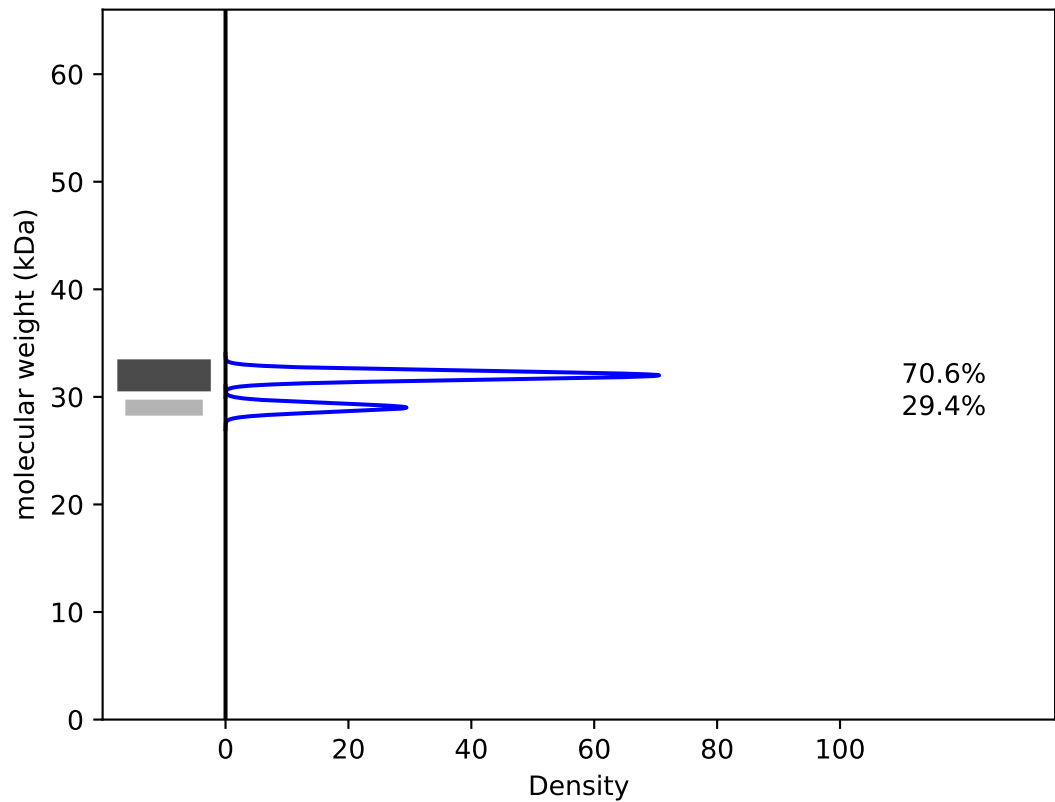

# P55039

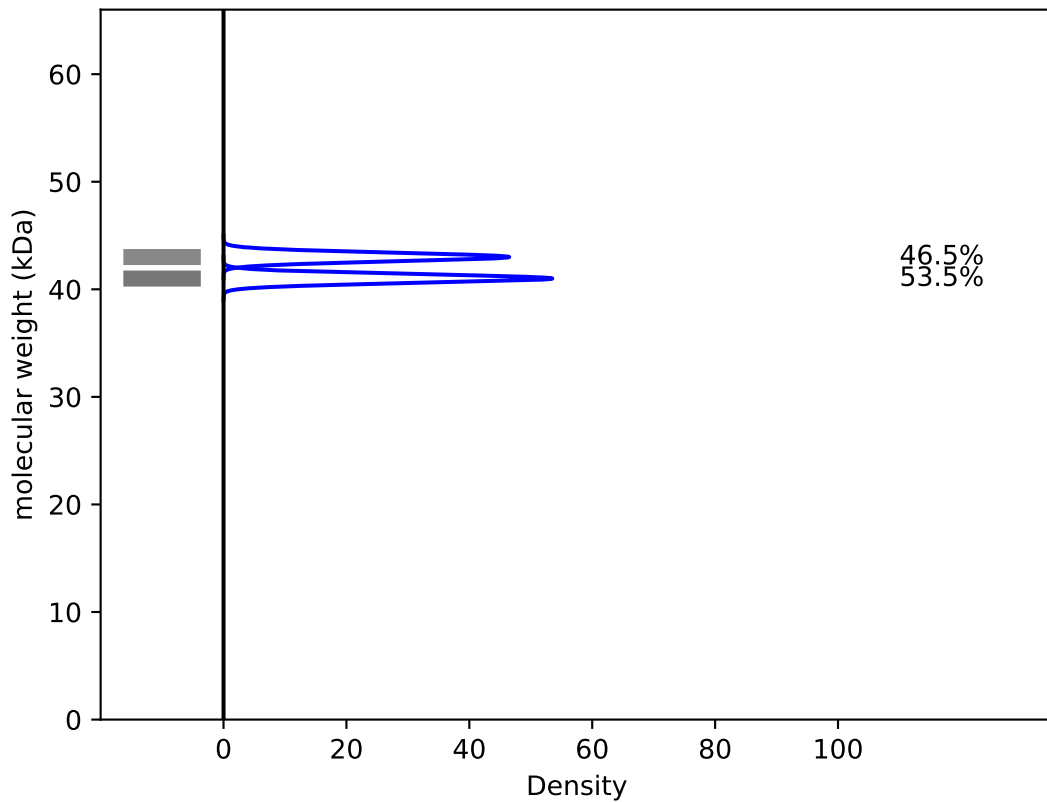



# P55209

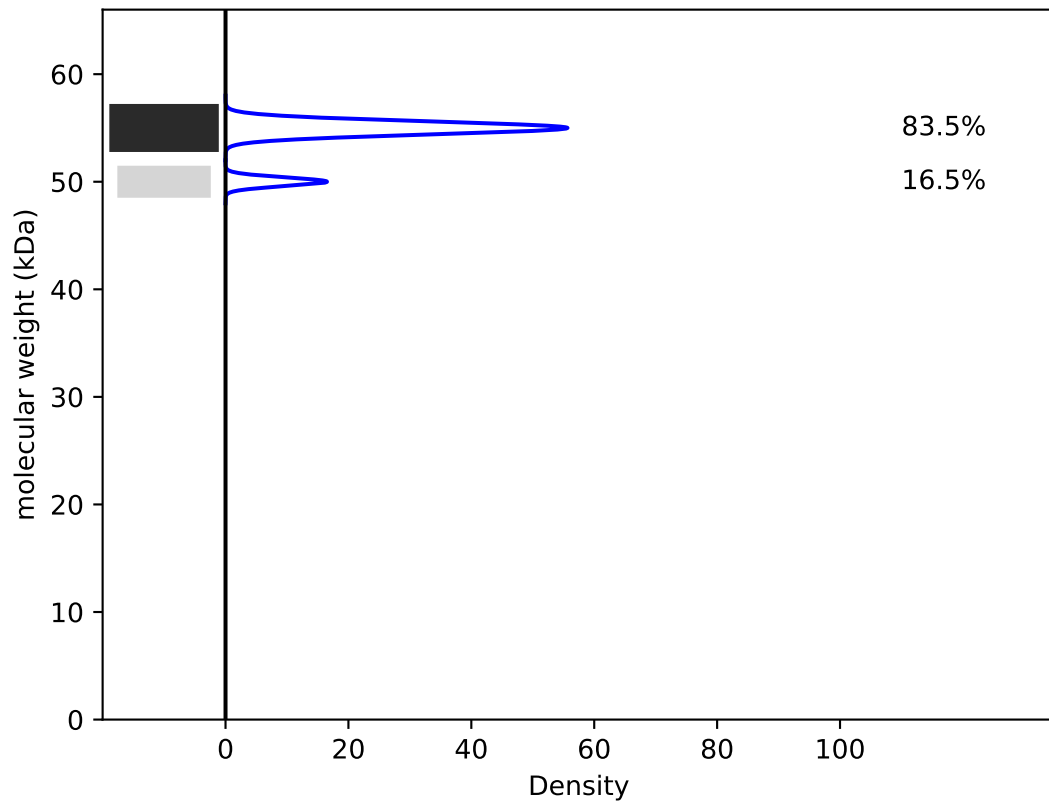

P55263



P55735



# P55809



# Q9BYC2



# P56182



# P56537



# P57088

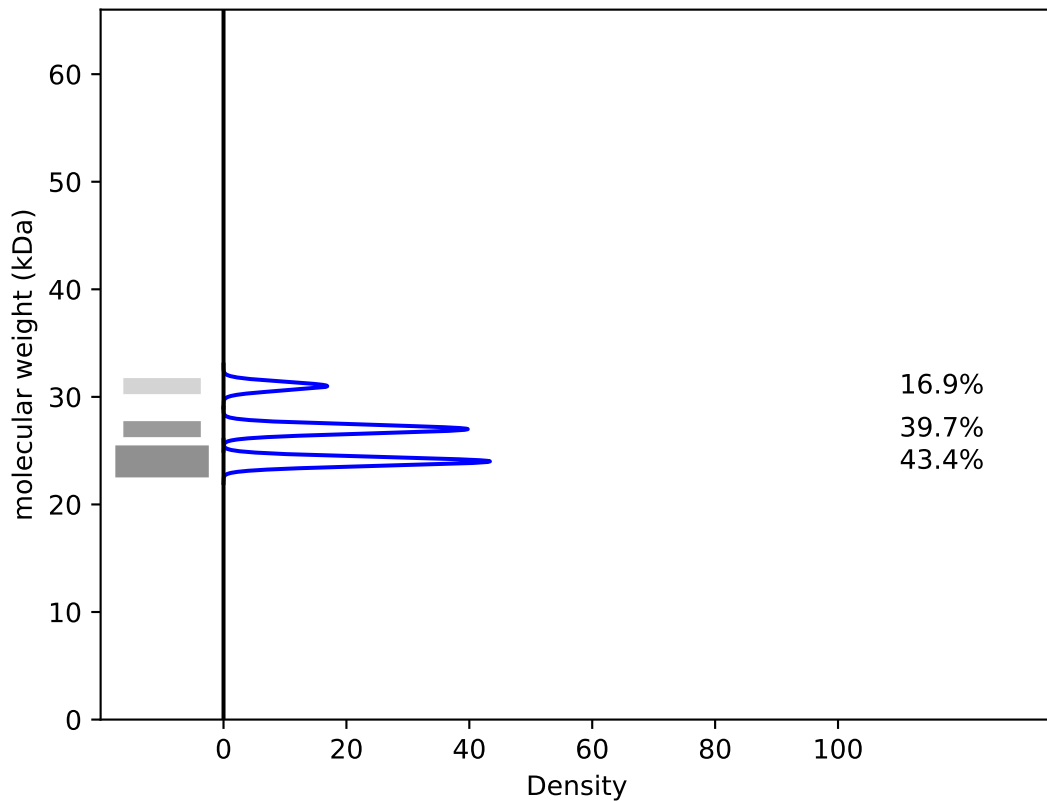



P57721



# P59998

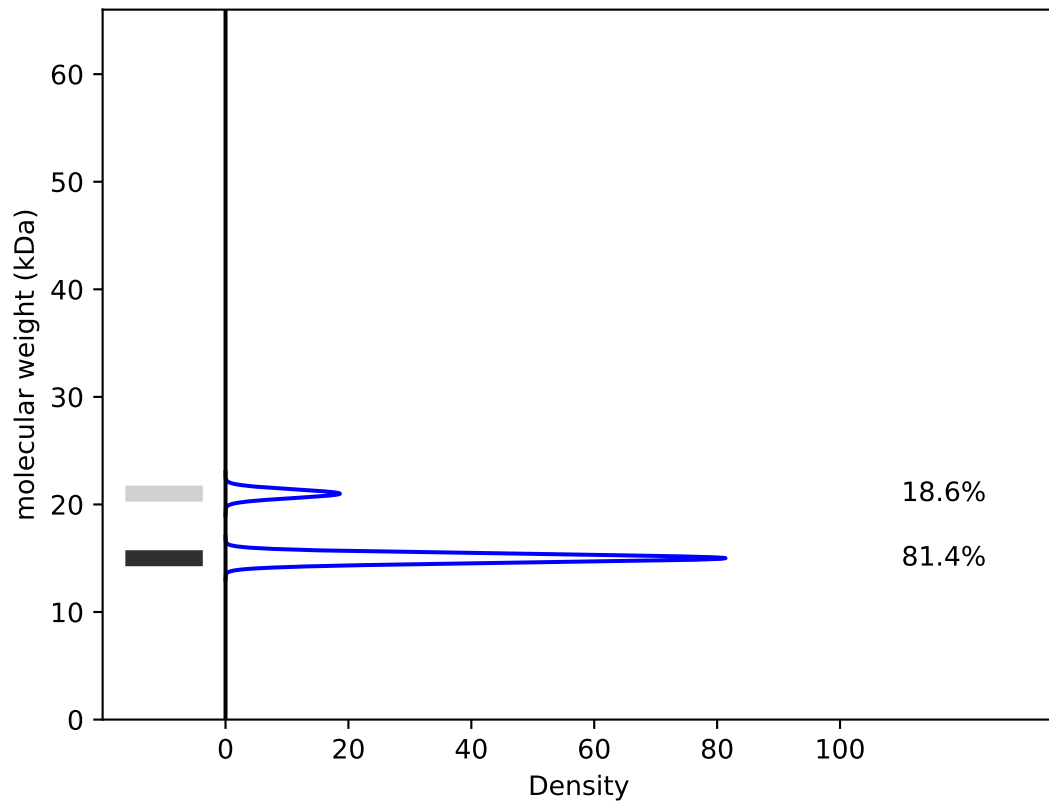

# P60228

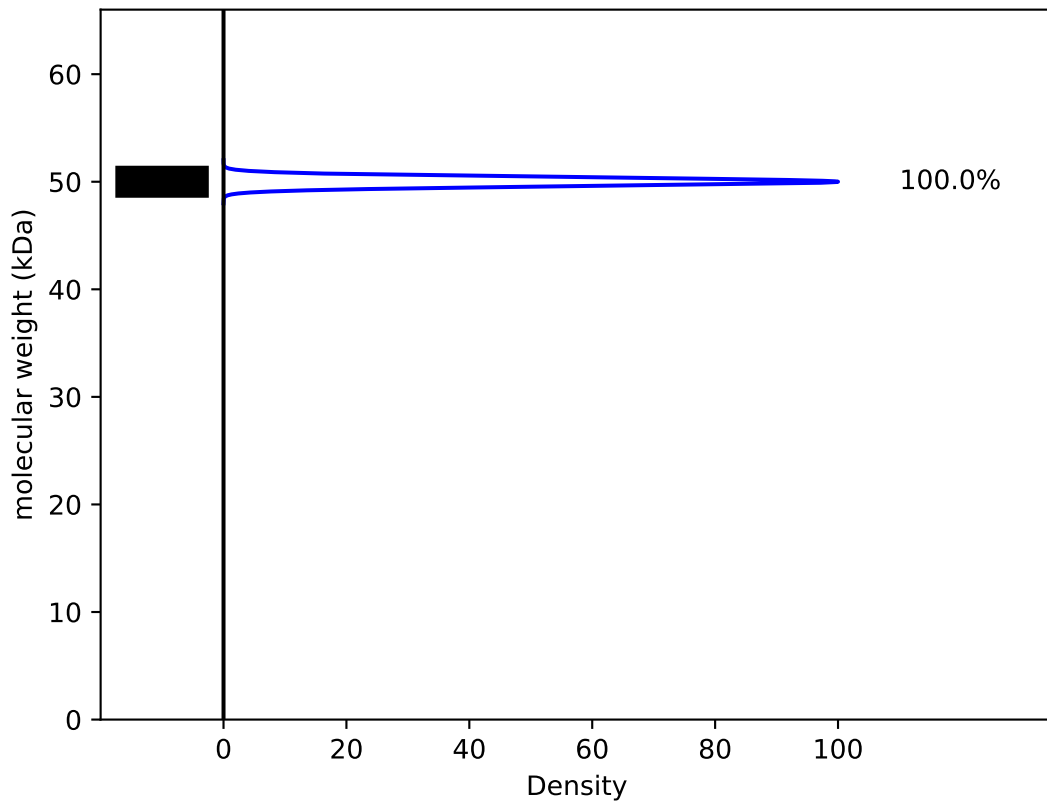

# P60510



# P60709



P60842



# P60866



# P60891

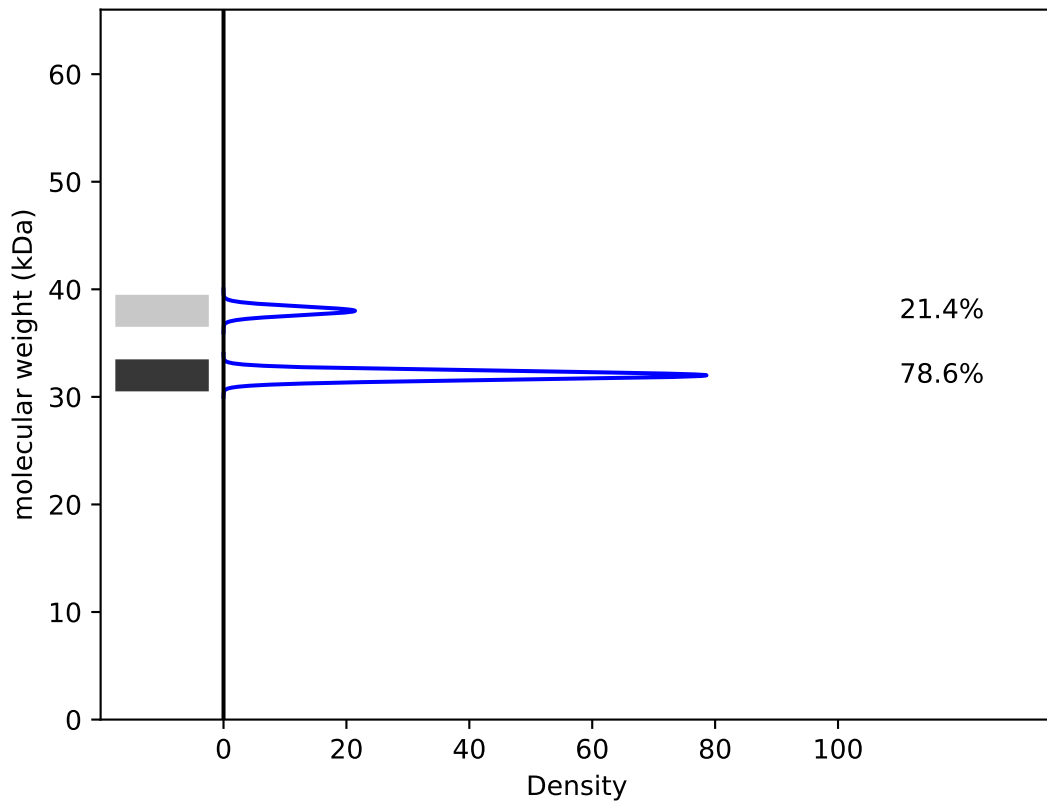



# P60900



# P60953

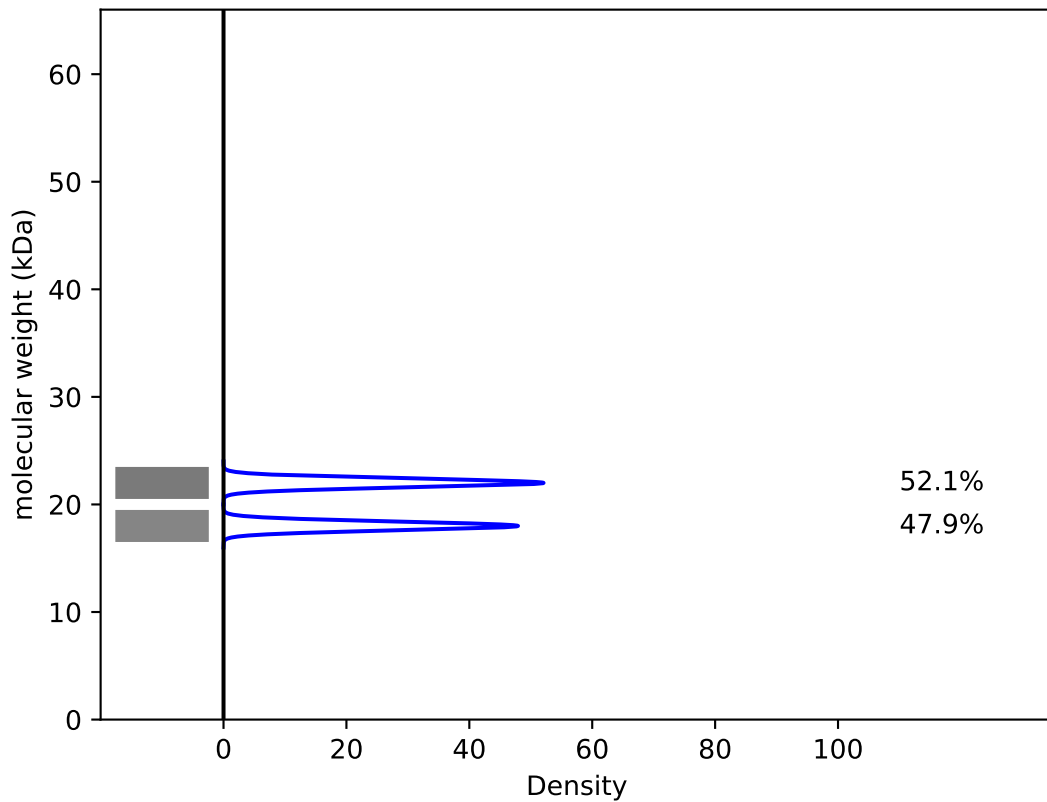

# P60981

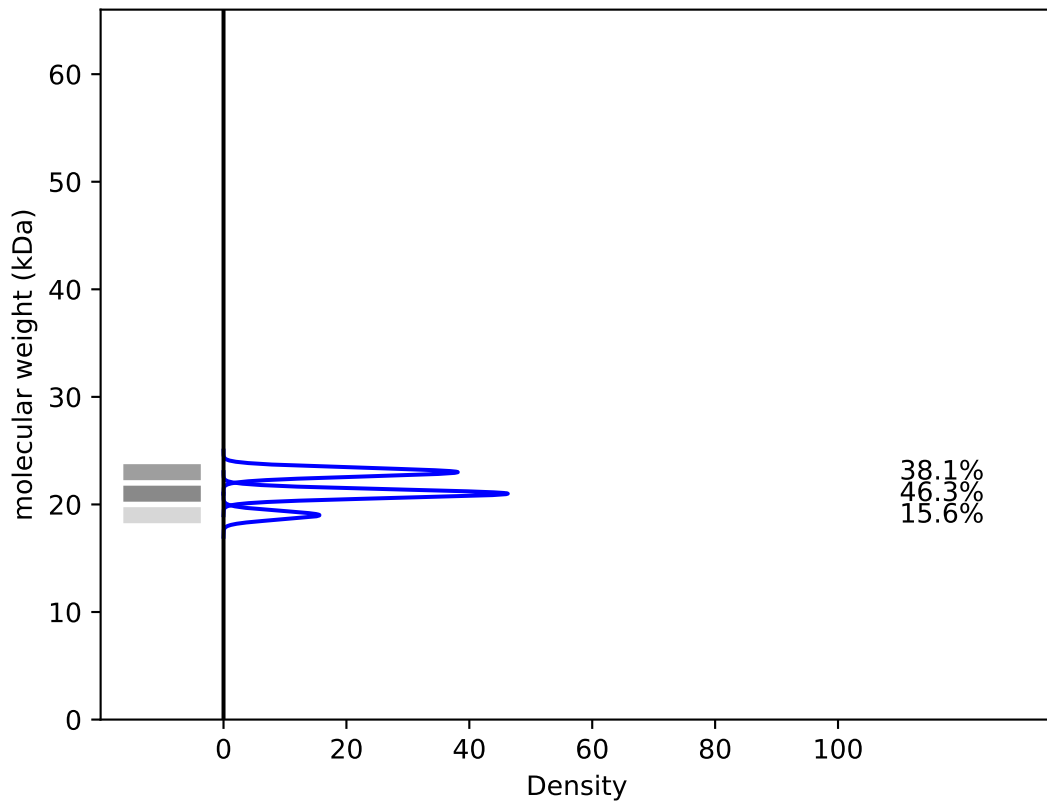

# P61006

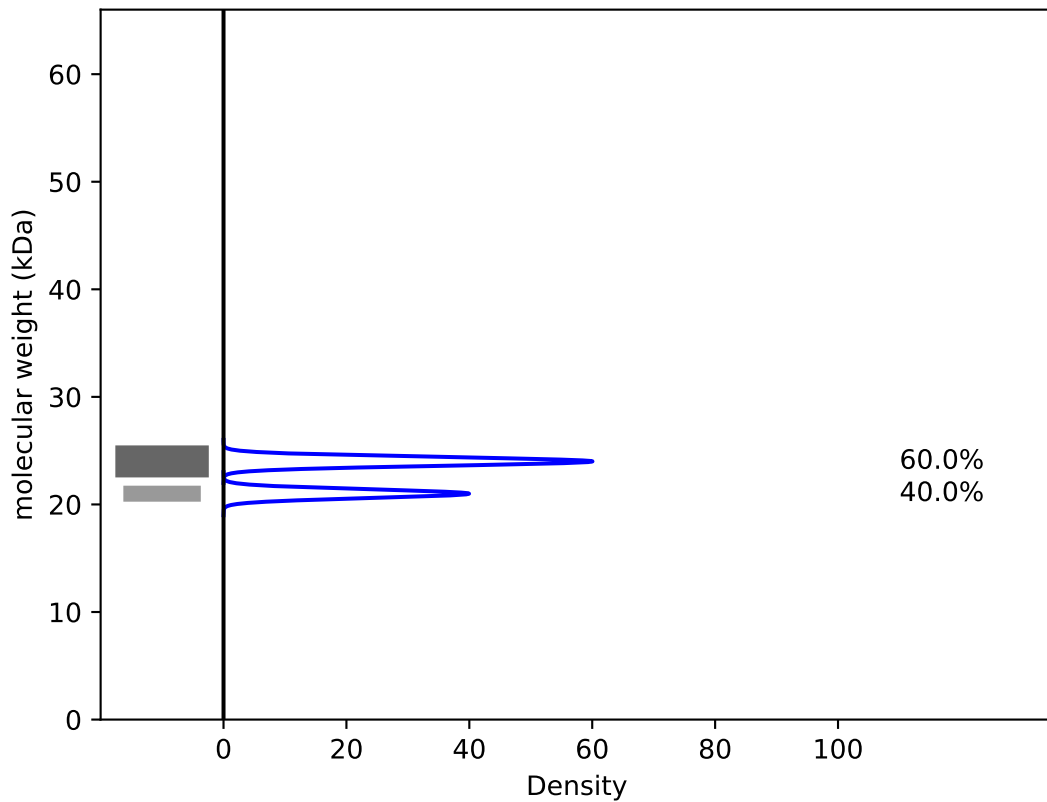

# Q92930



# P61009

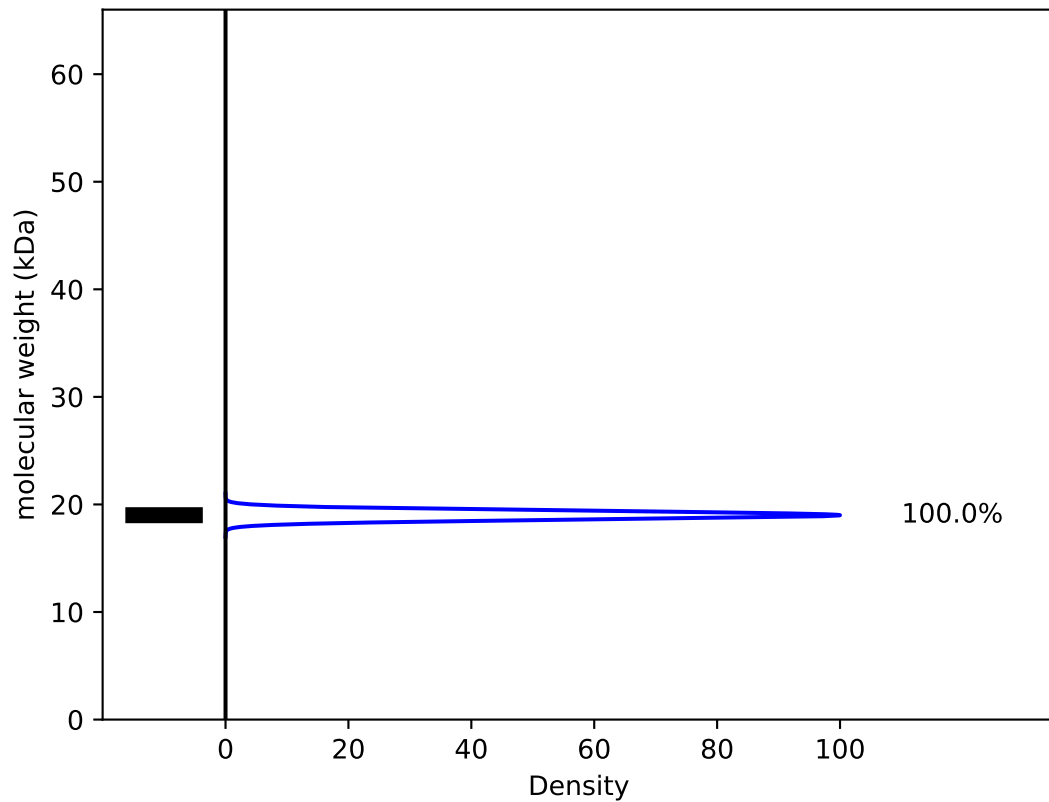

# P61011

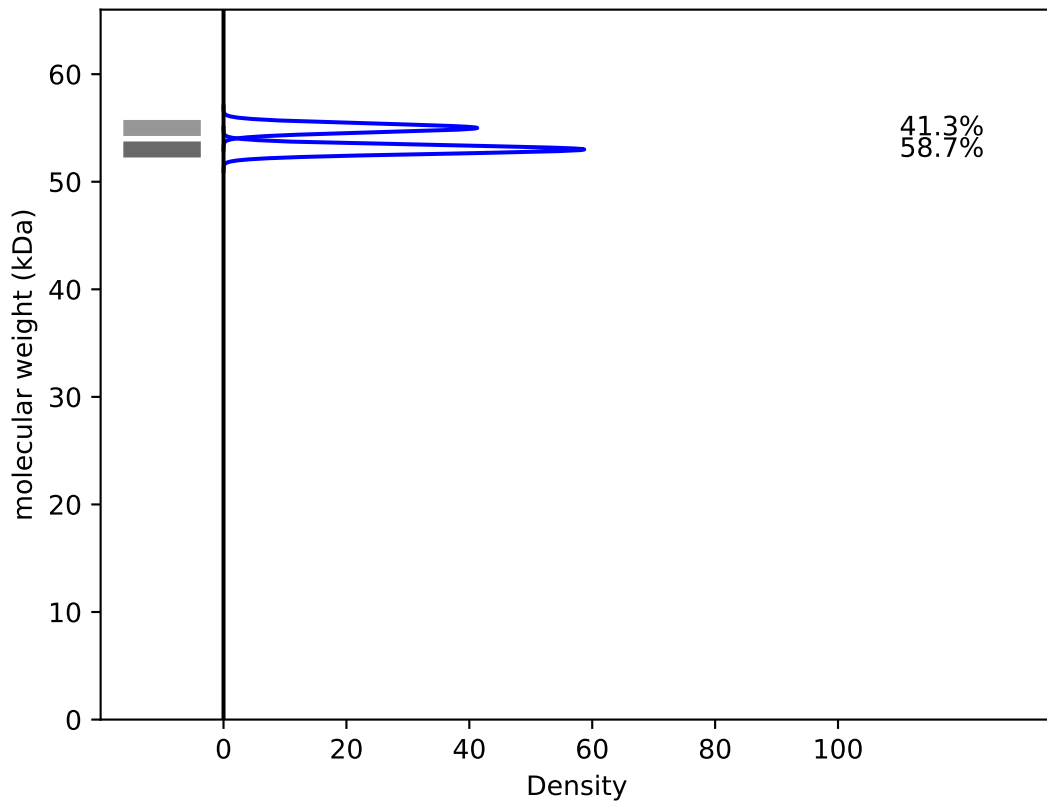

# P61019

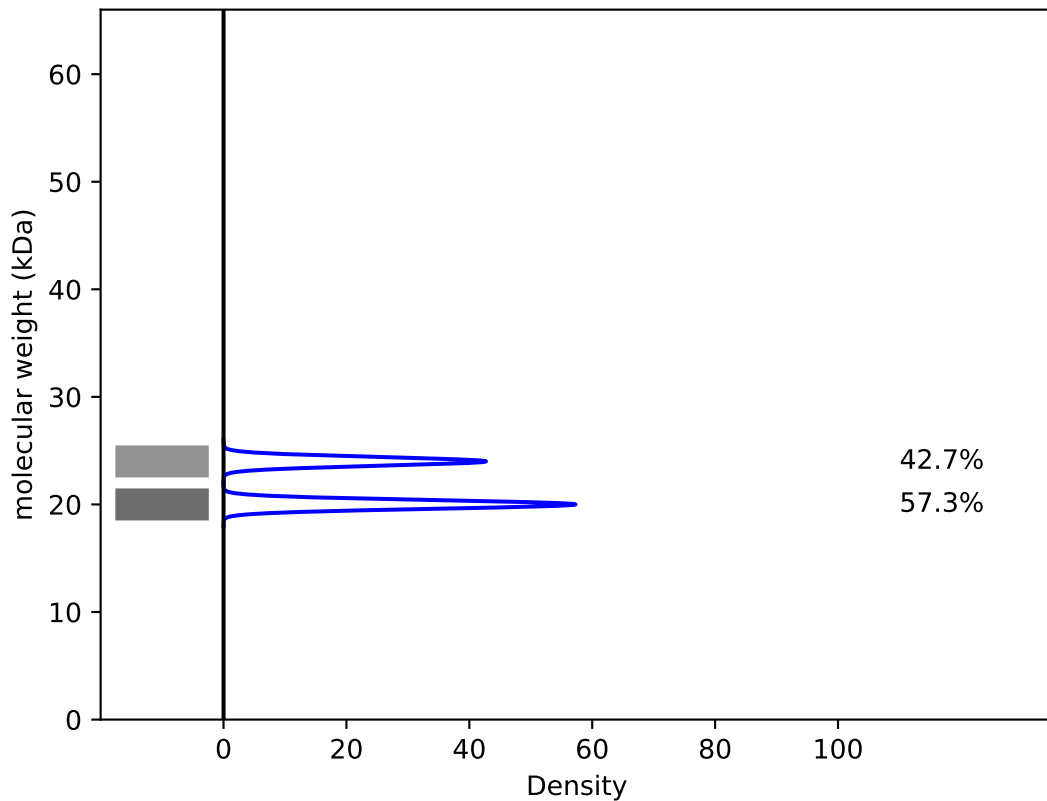



# Q8WUD1

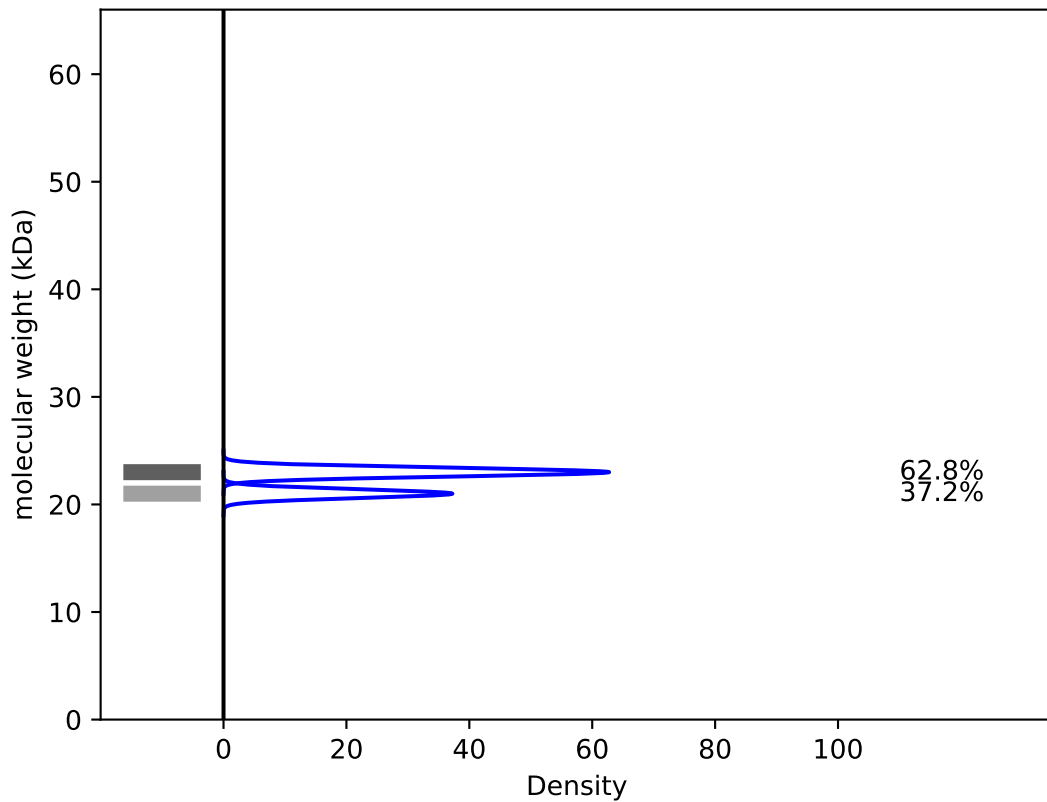

# P61020

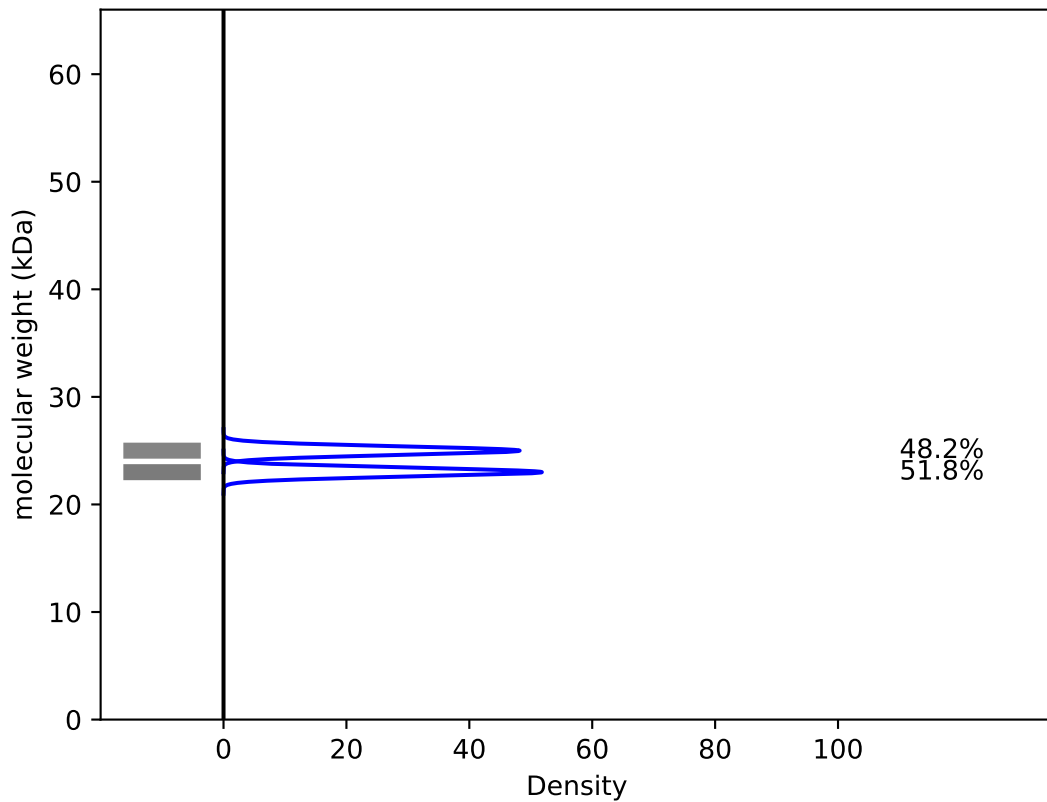

# P61026

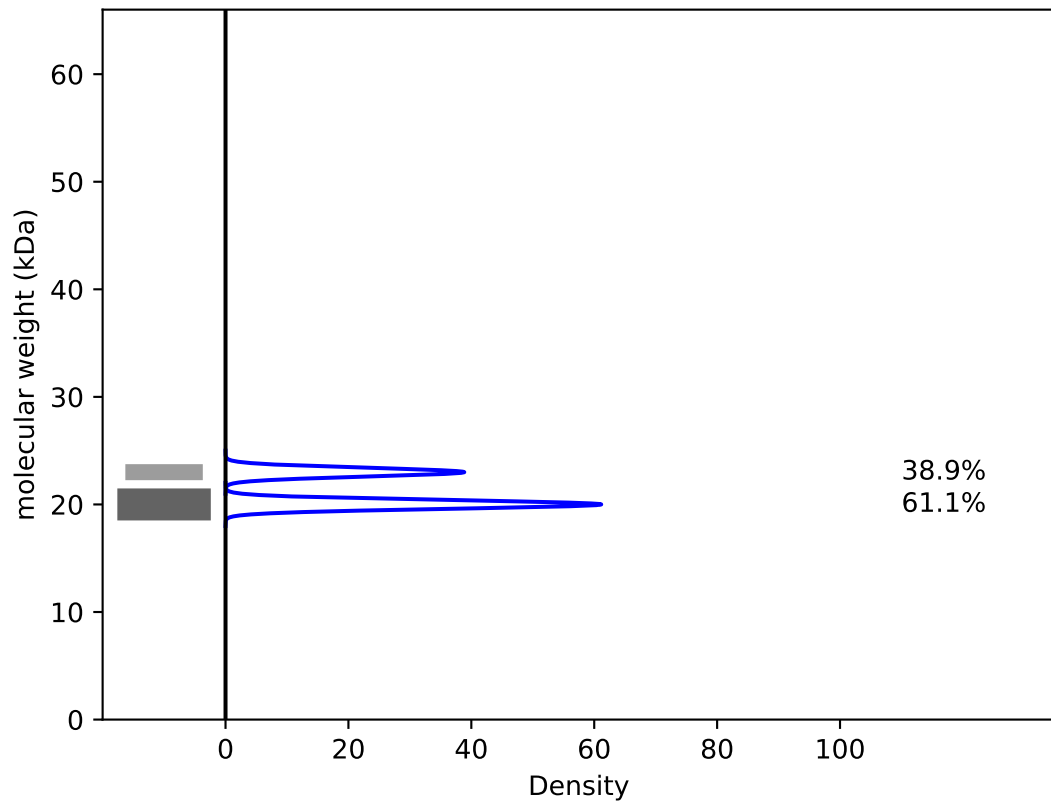

# P61081

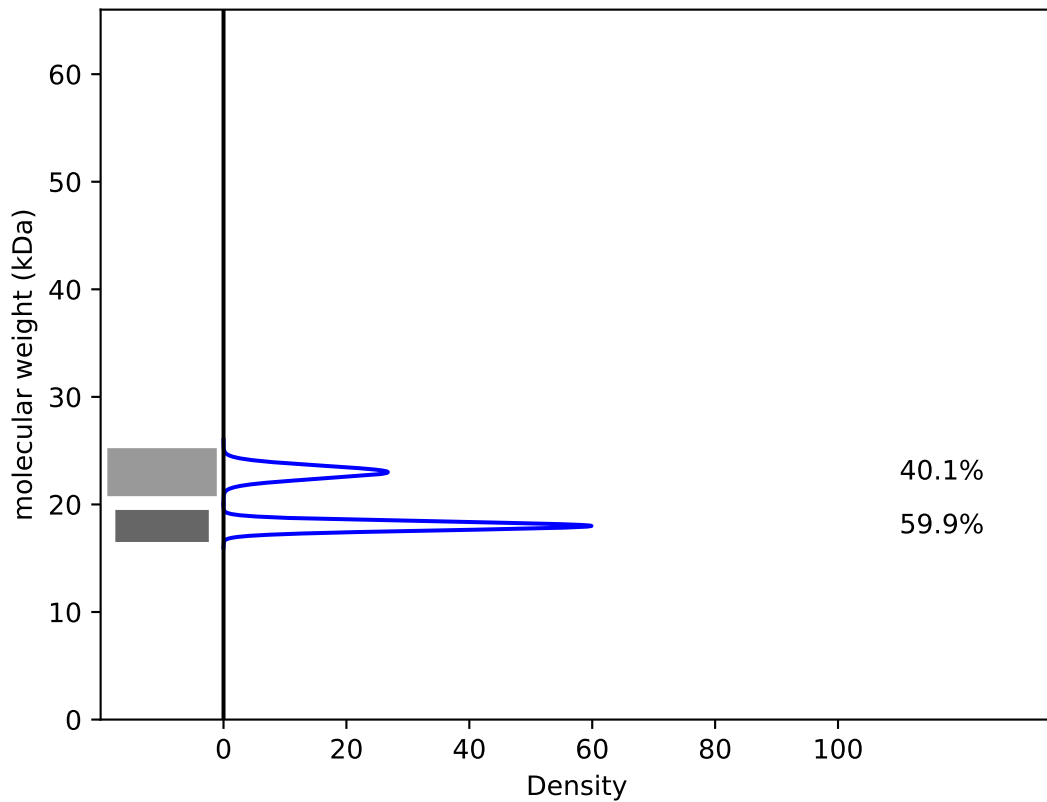

# P61086

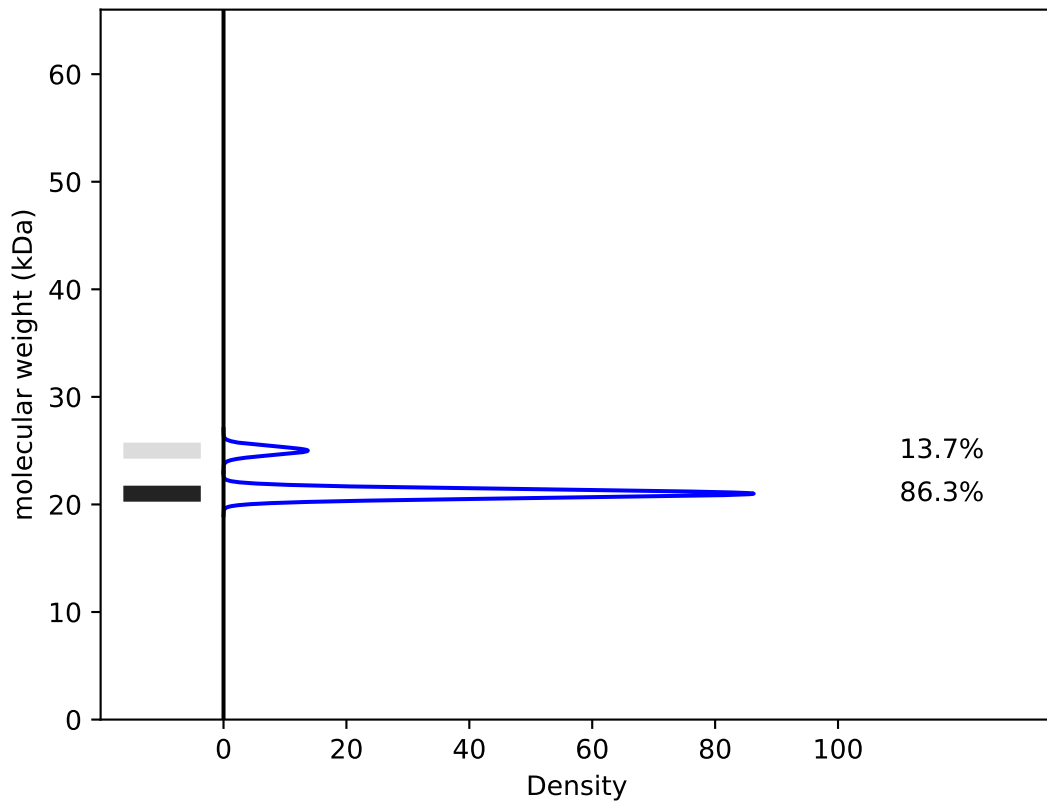

# P61088

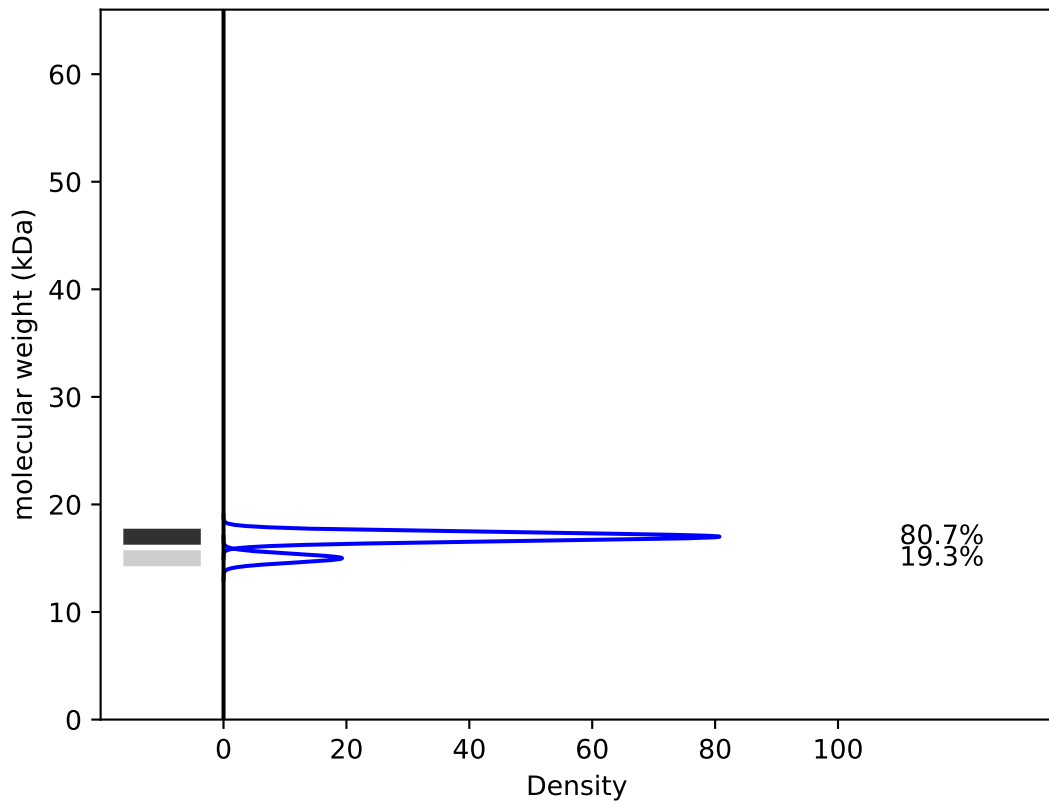

# Q5JXB2



# P61106

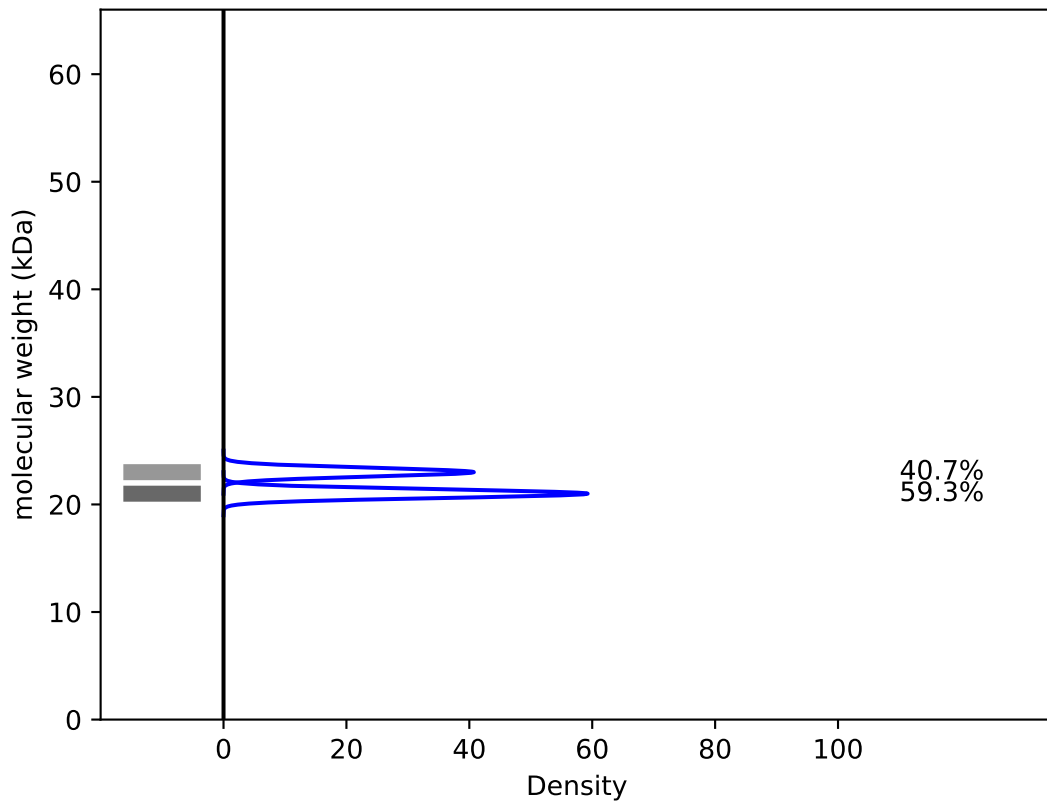



# P61158



# Q9P1U1



# P61160



# P61163

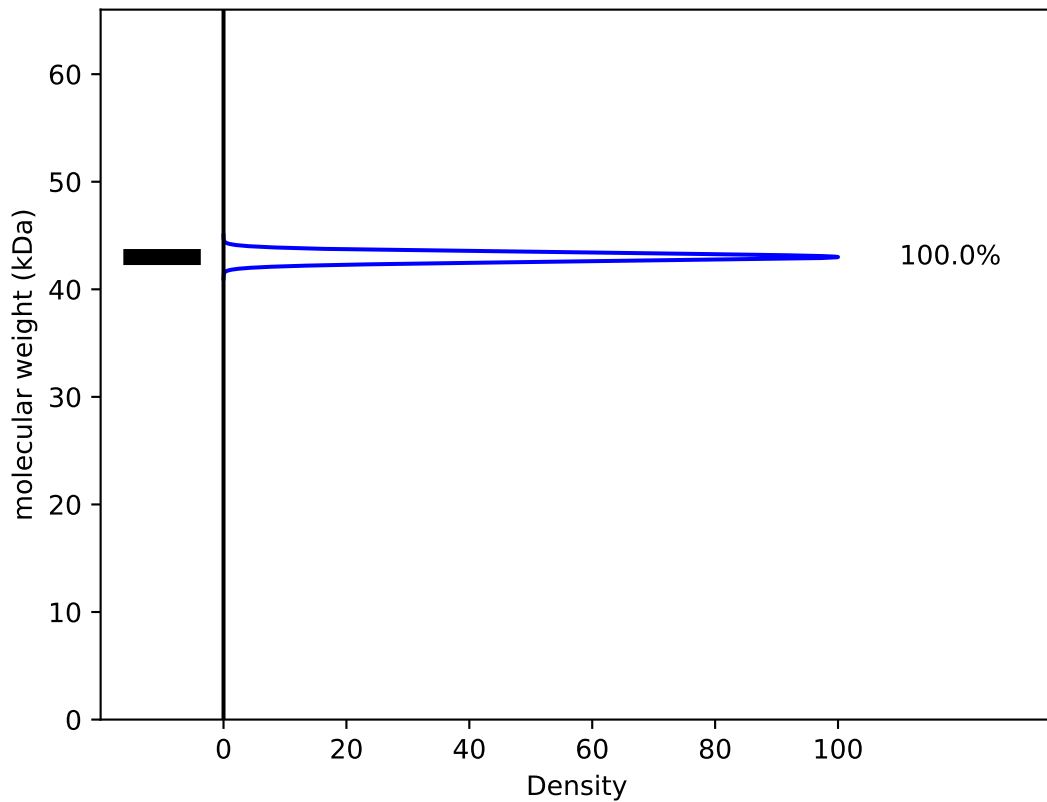

# P84077

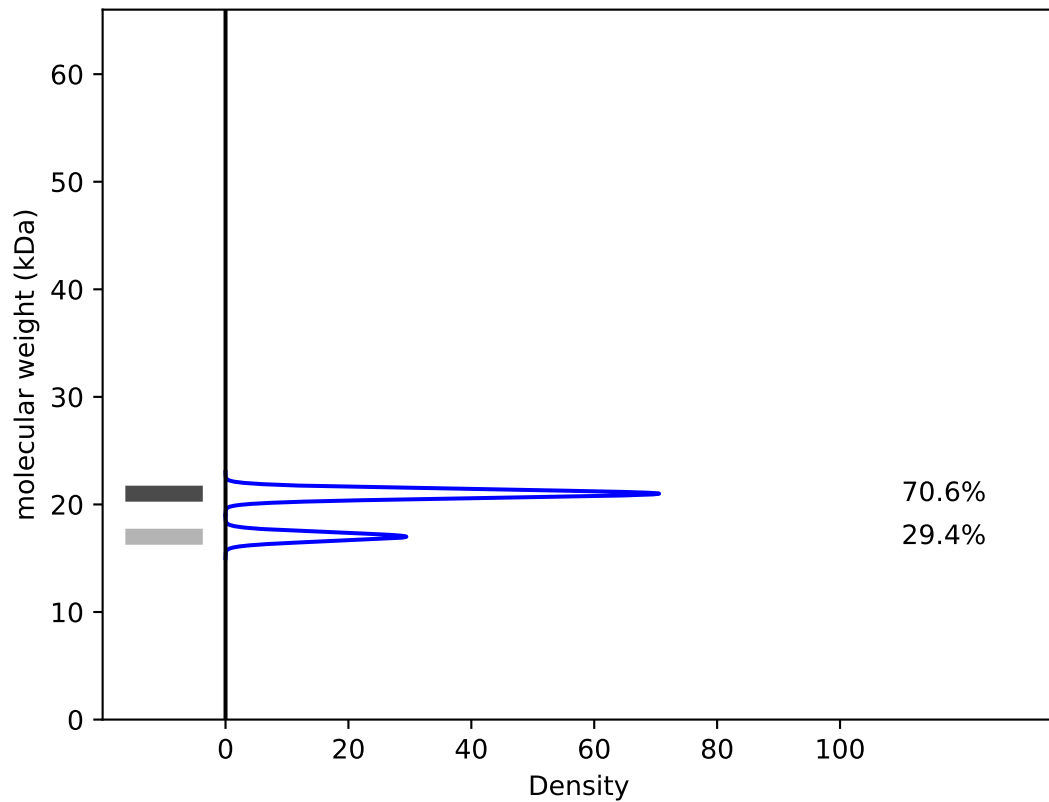

# P61204

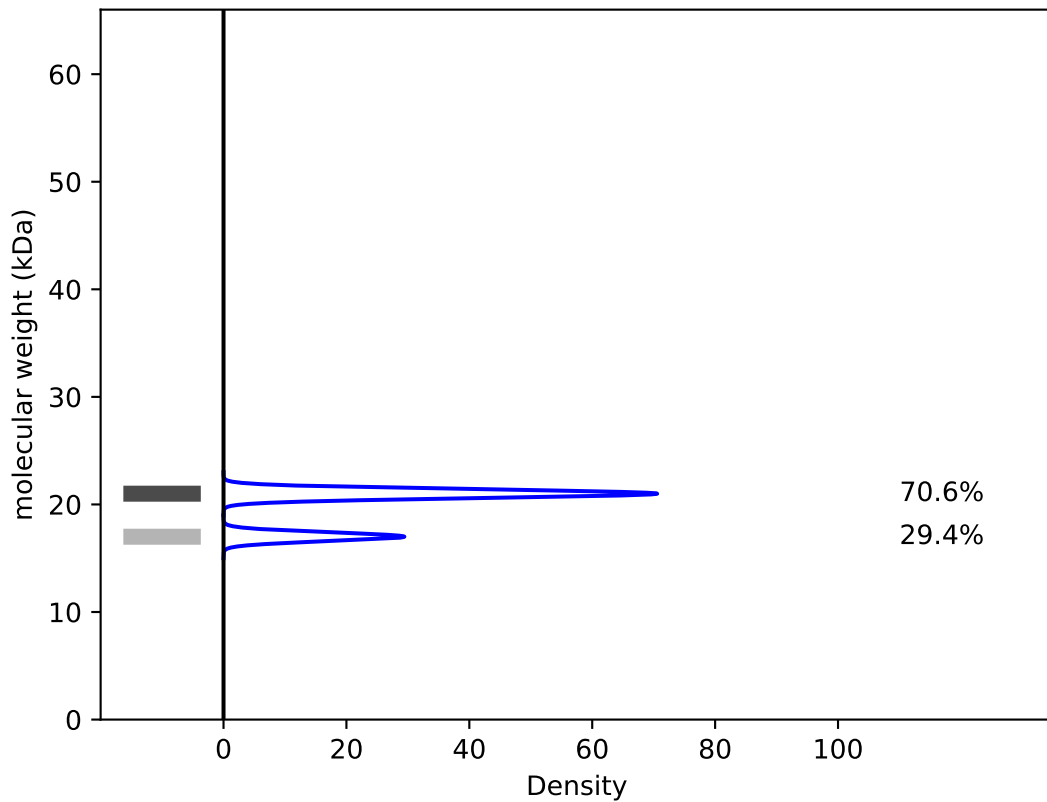

# P62834

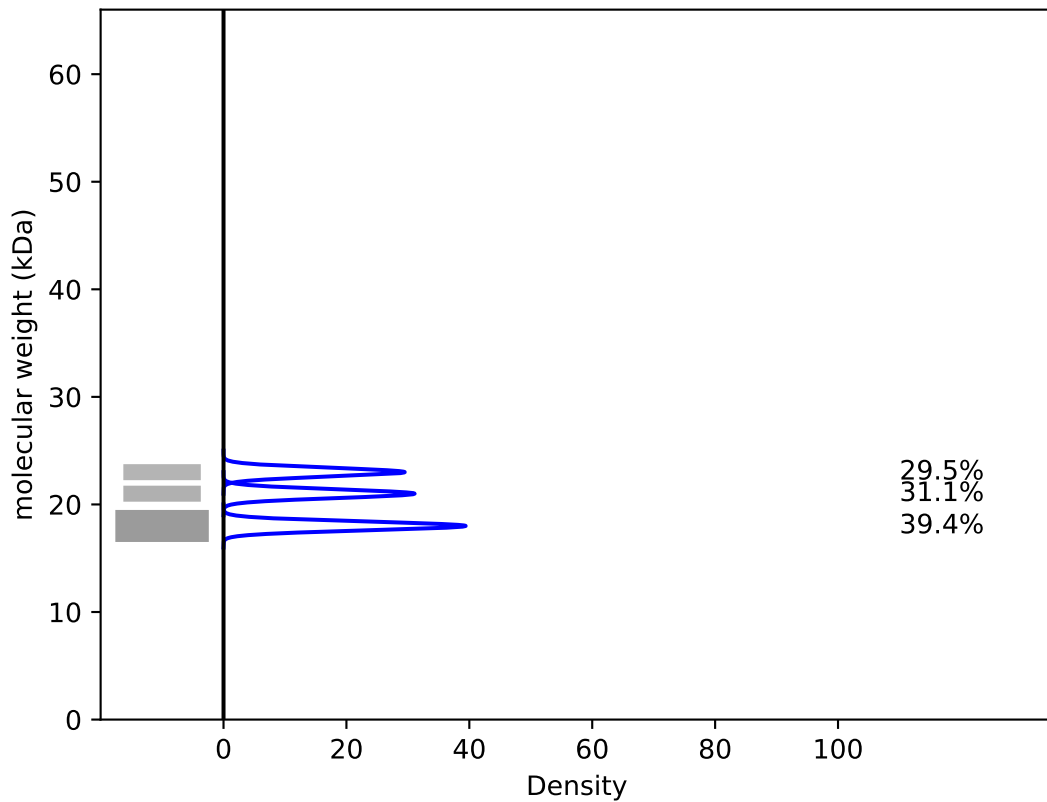

# P61224





# A6NIZ1



# P61247

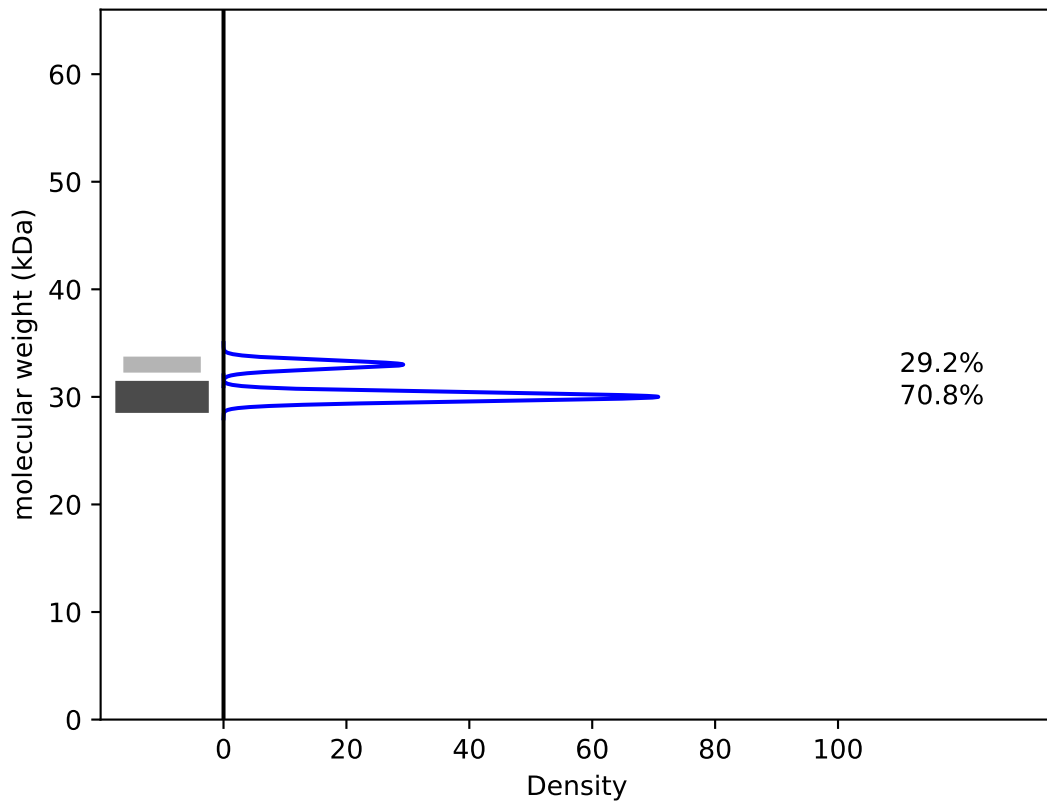

P61254



# Q9UNX3

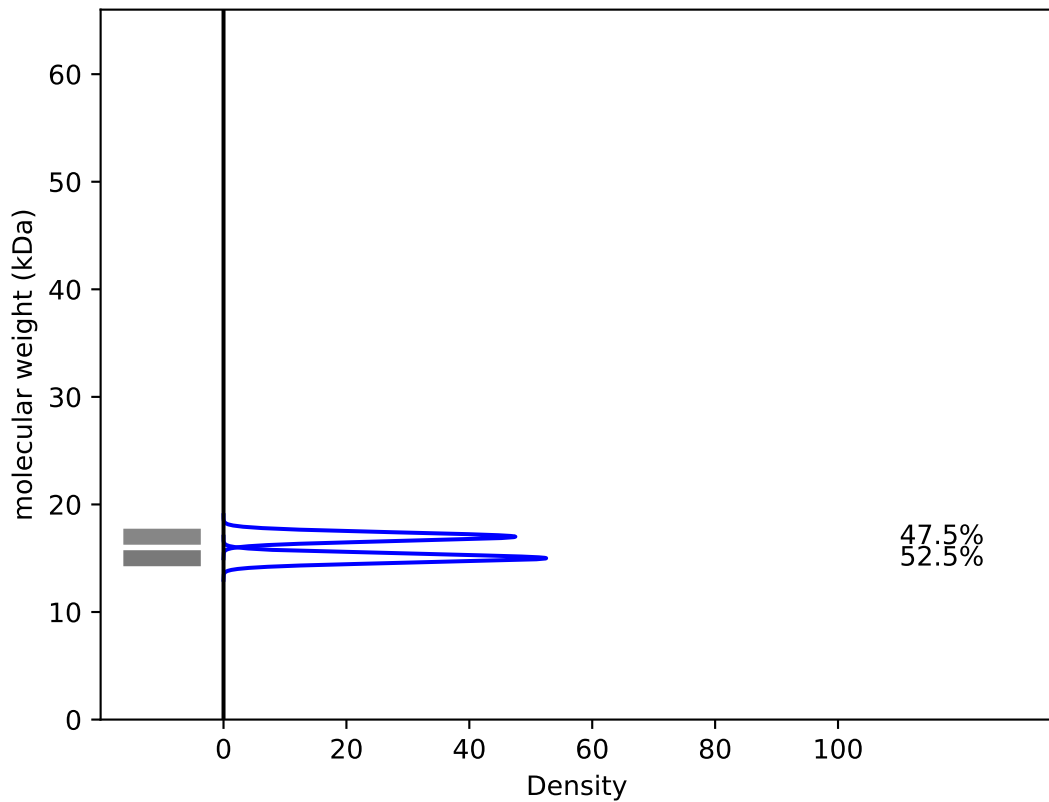

# P61289

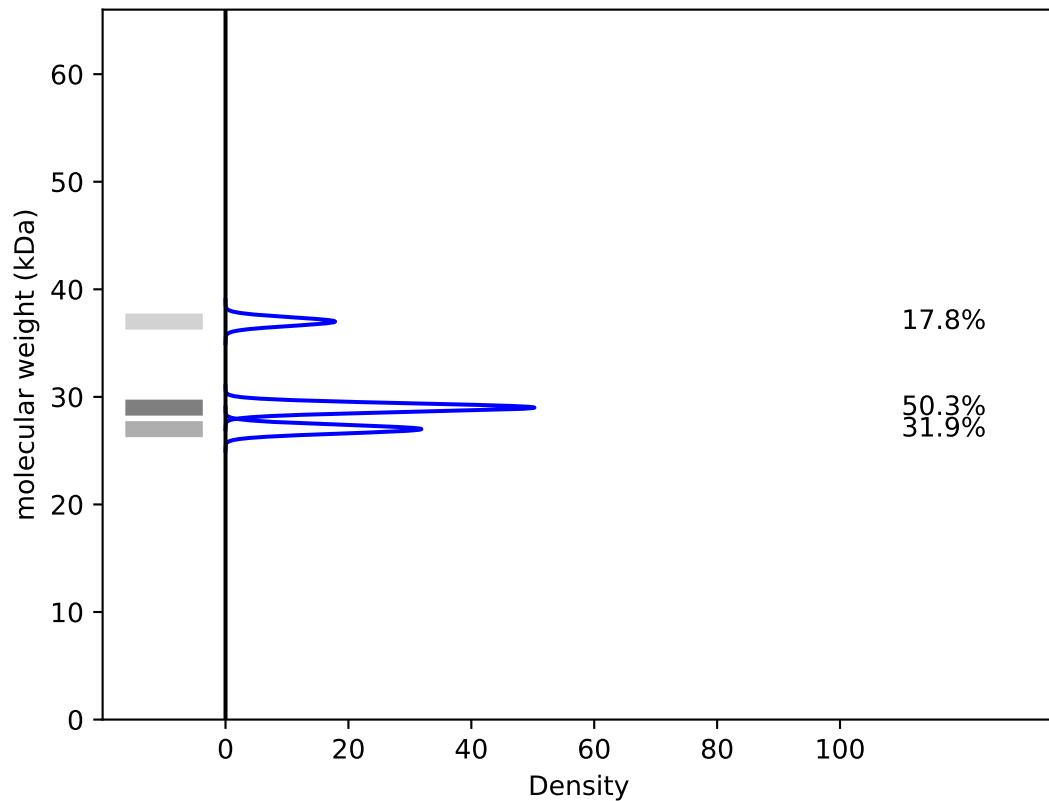

# P61313

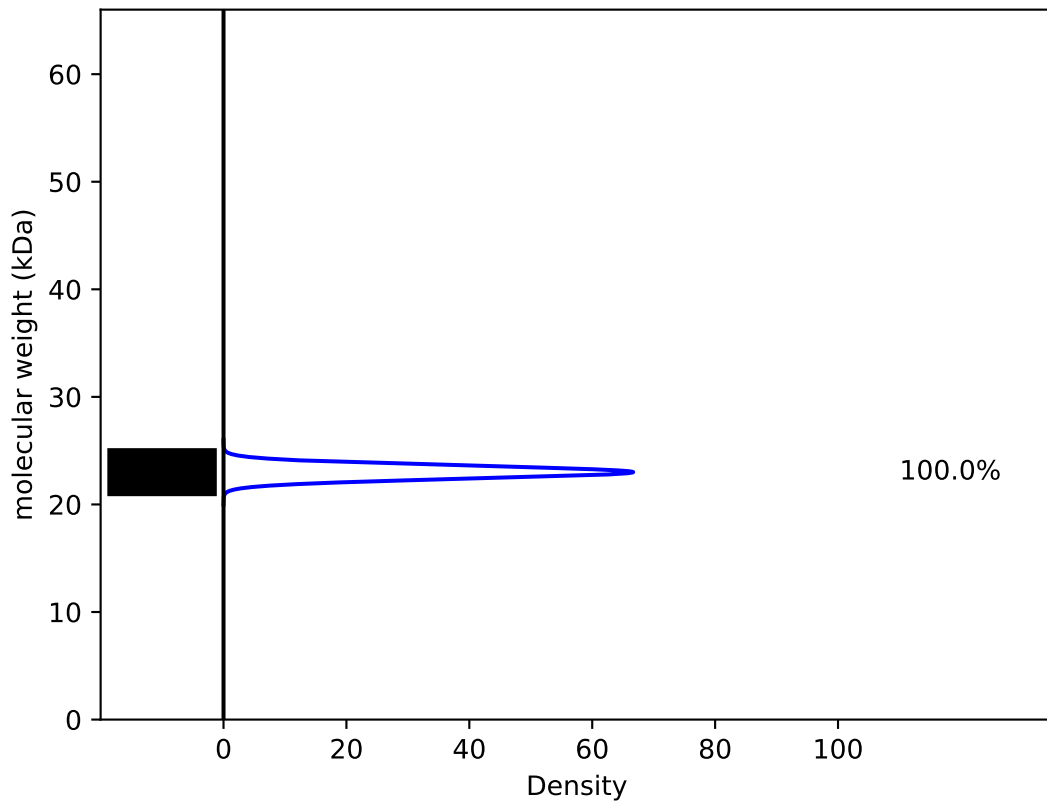

# P61353

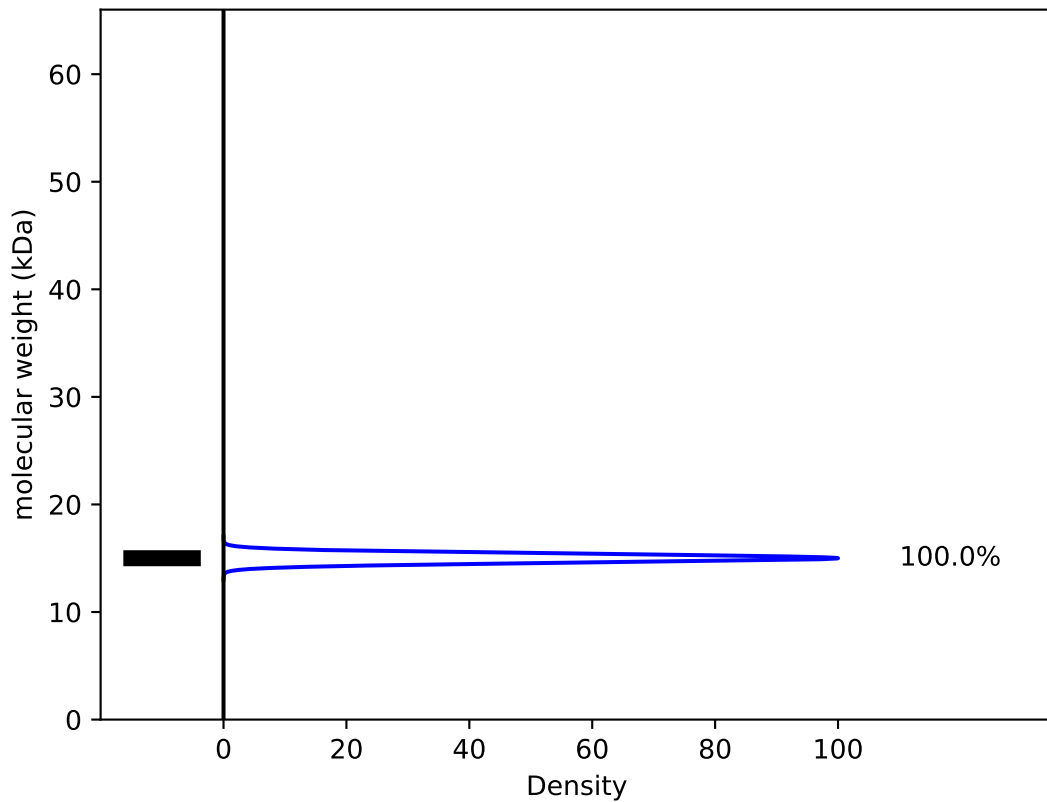

# P61421





# P61586

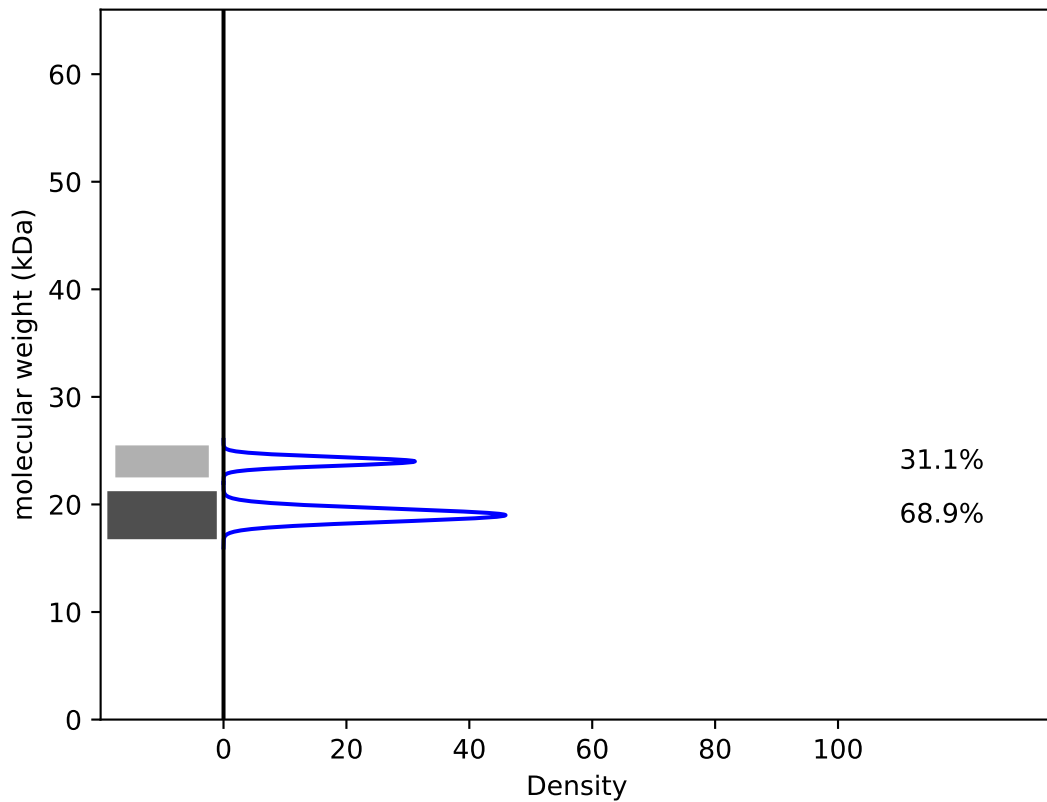

# P61619



# Q9H9S3



# P61626

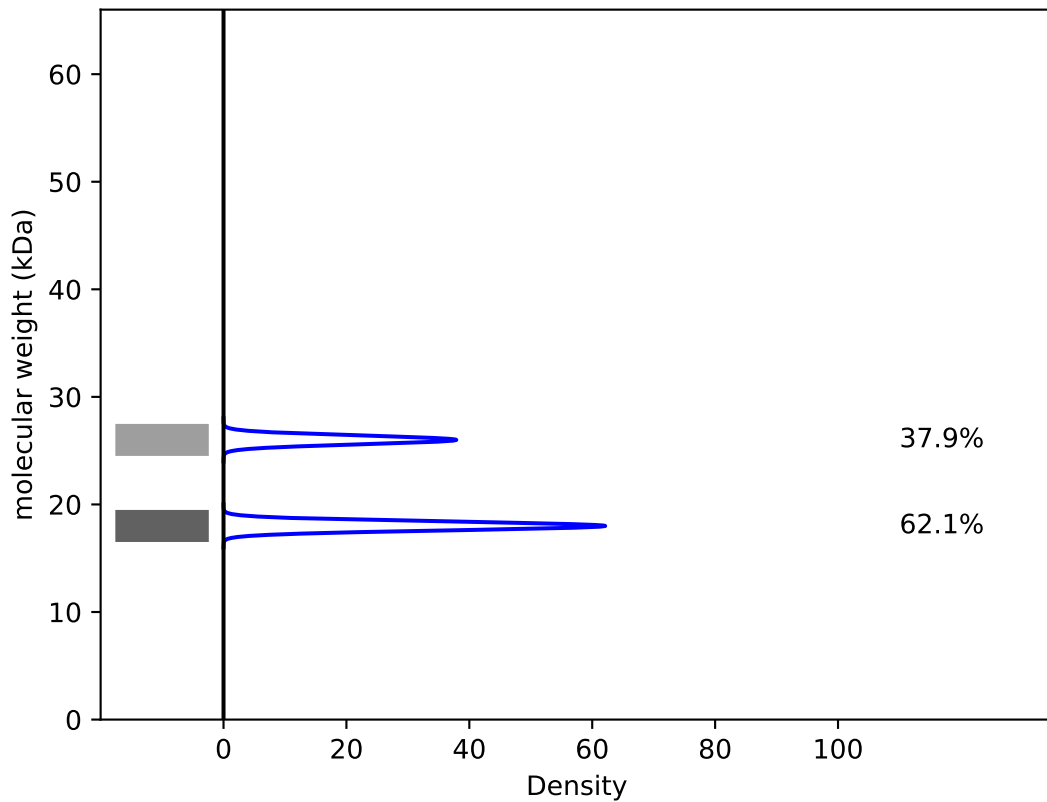

# P61916

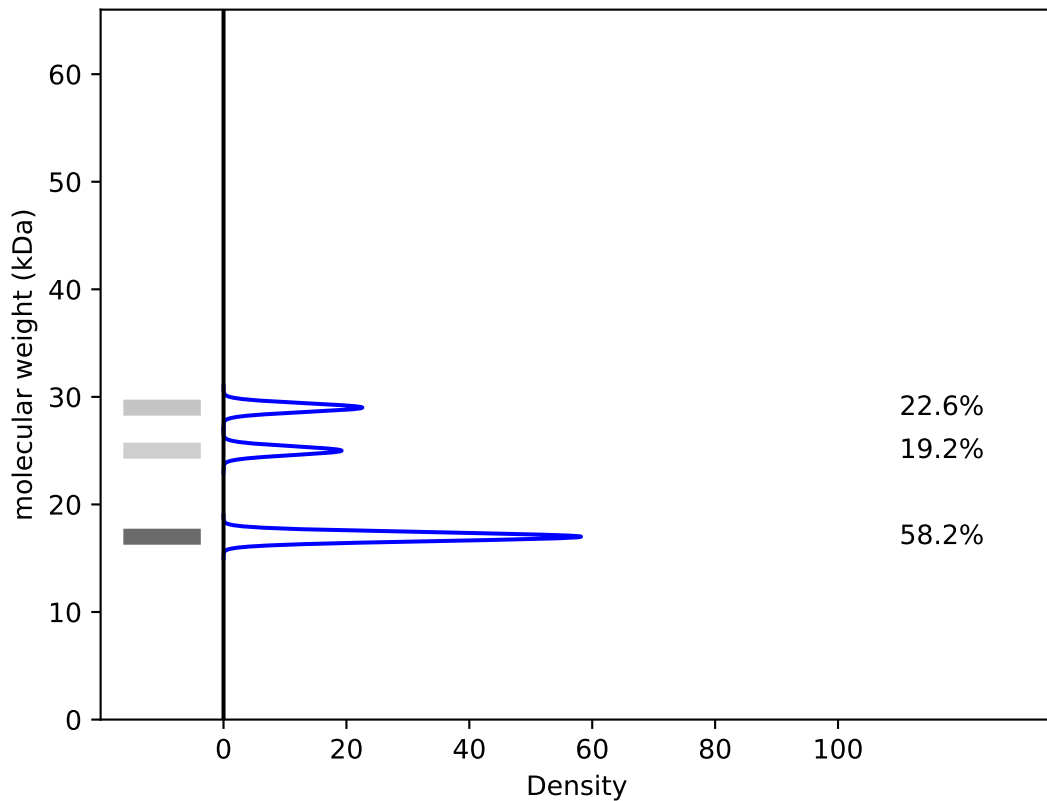

# P61923



# P61964



# P61978





# P61981



# P62081

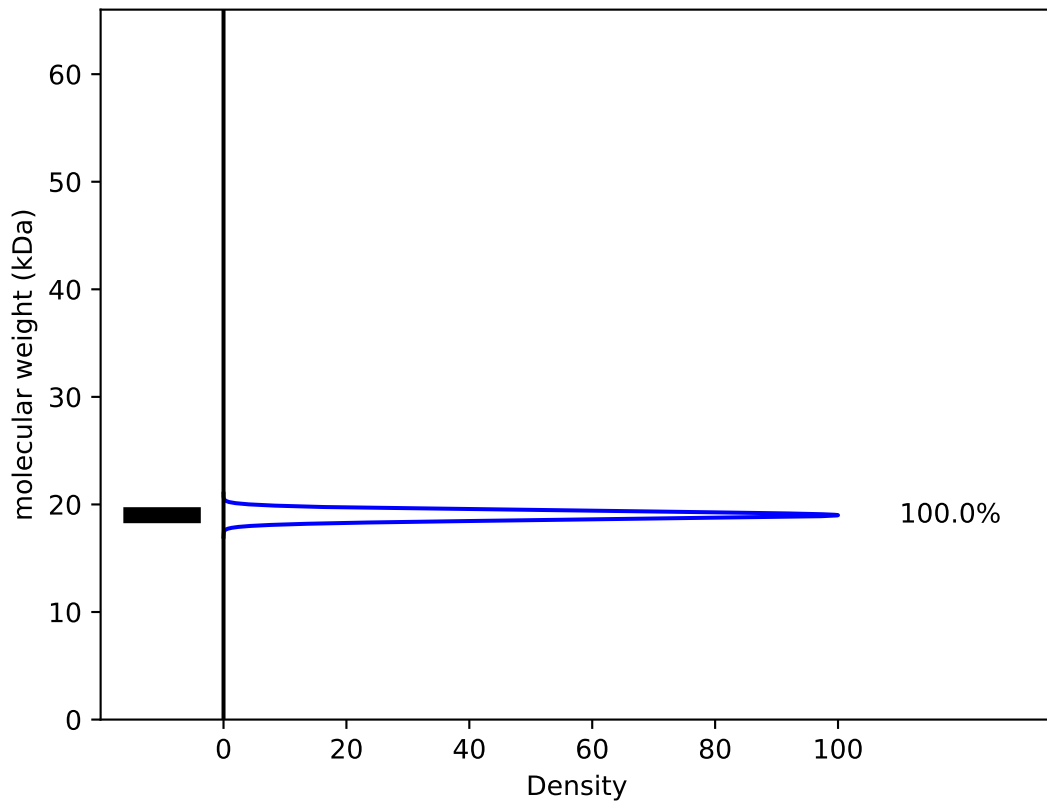

# P62136

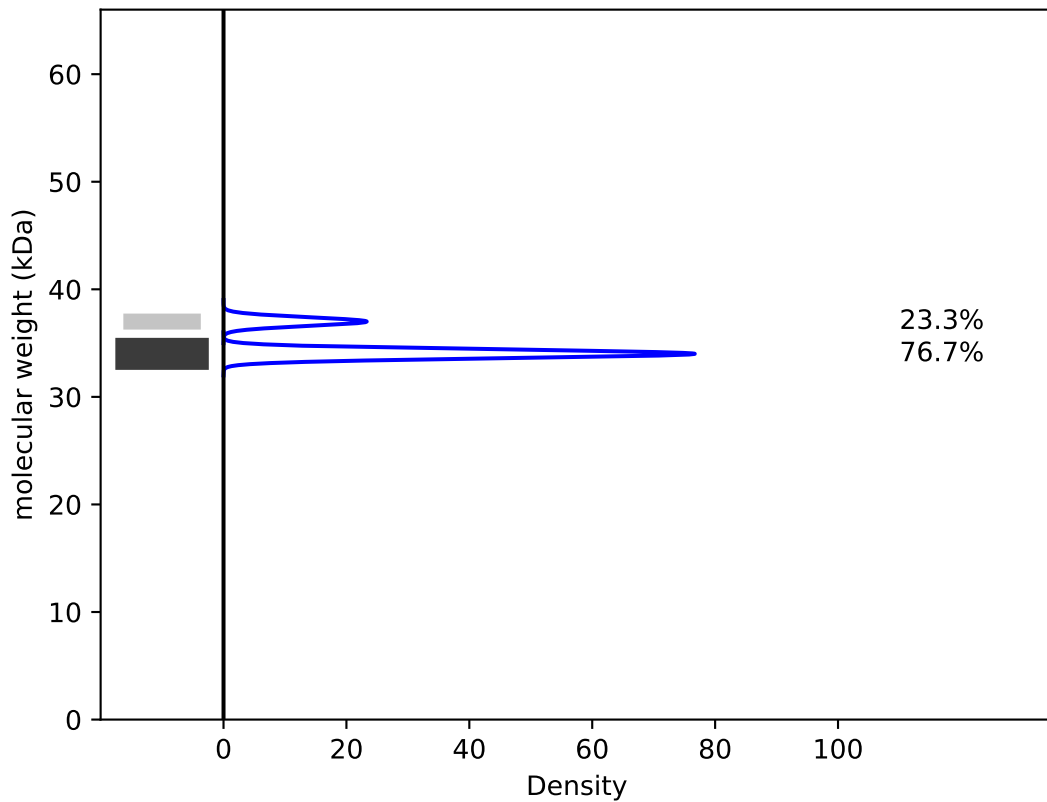

# P62140

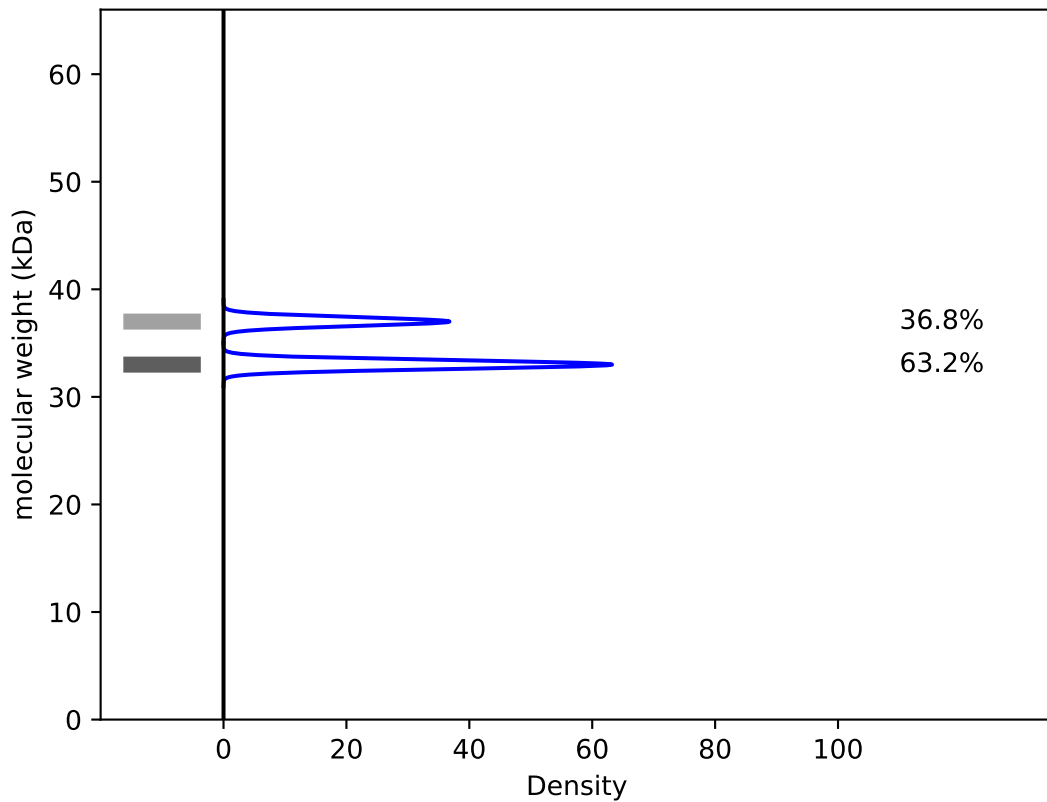

# P62191

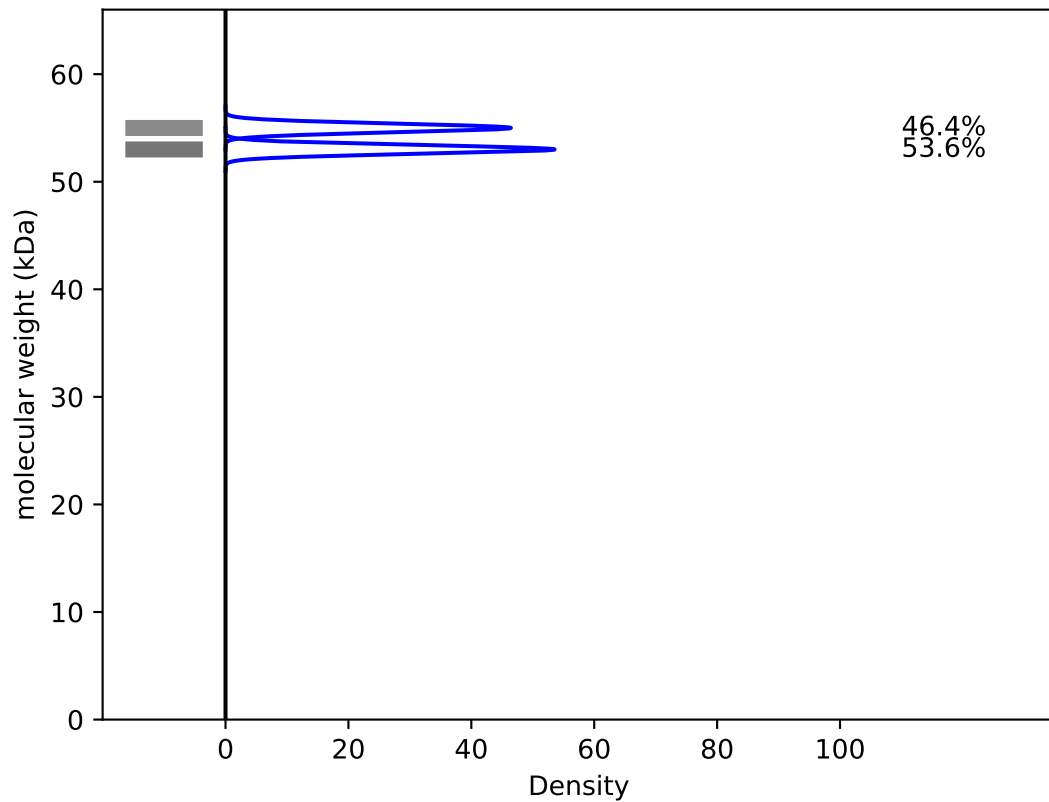

# P62195



P62241



# P62244

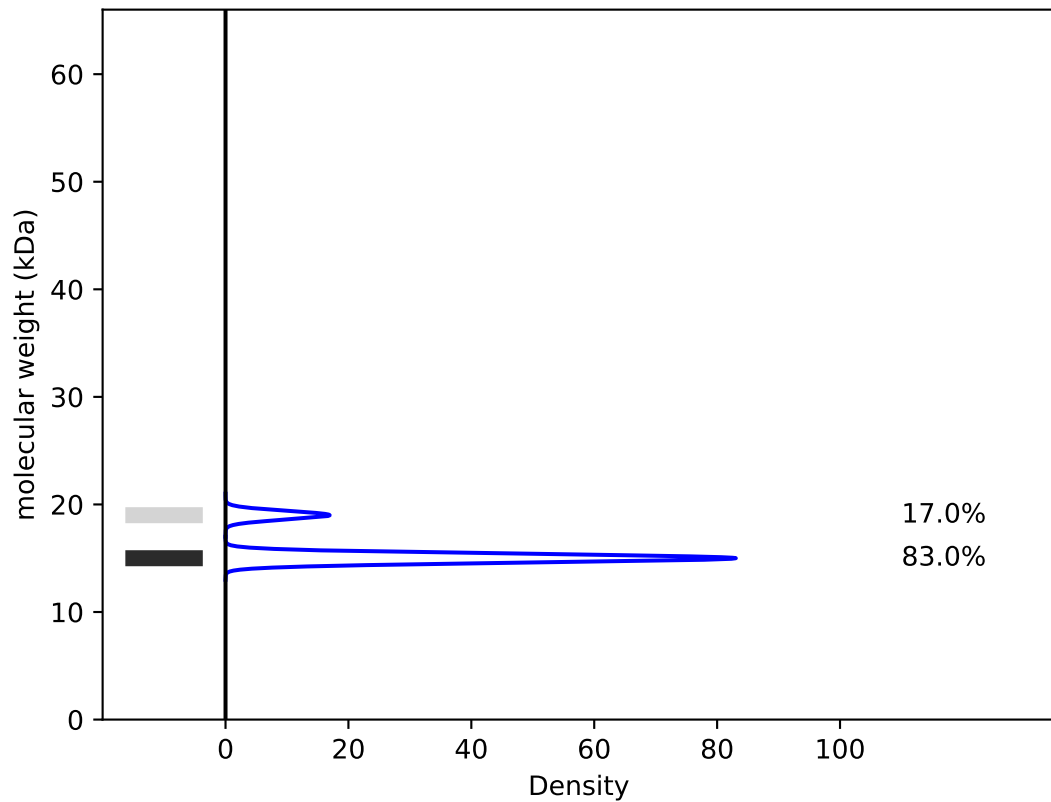



# P62249

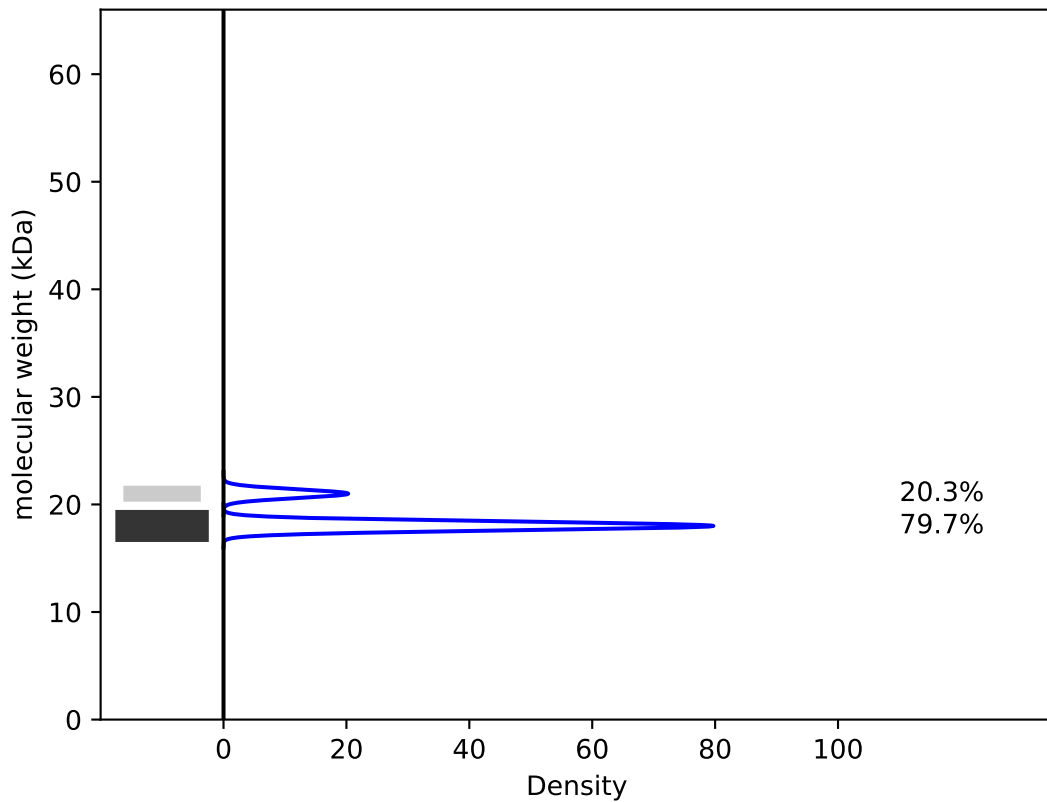

P62258

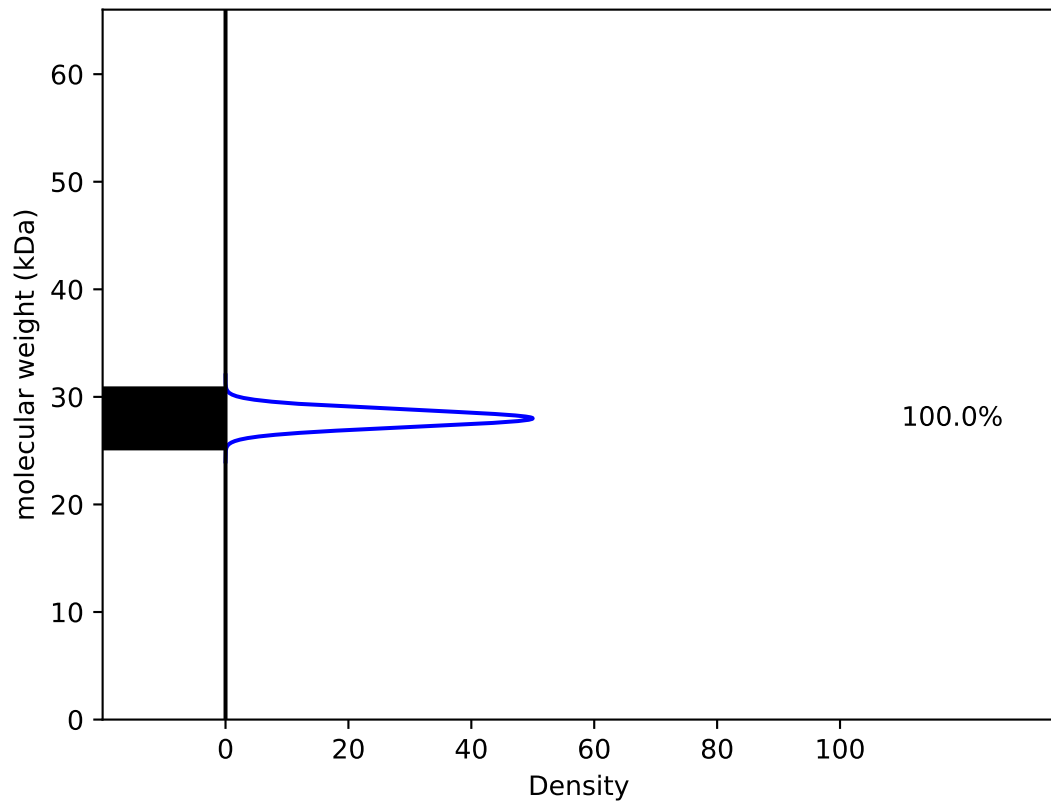

P62263



P62266



P62269

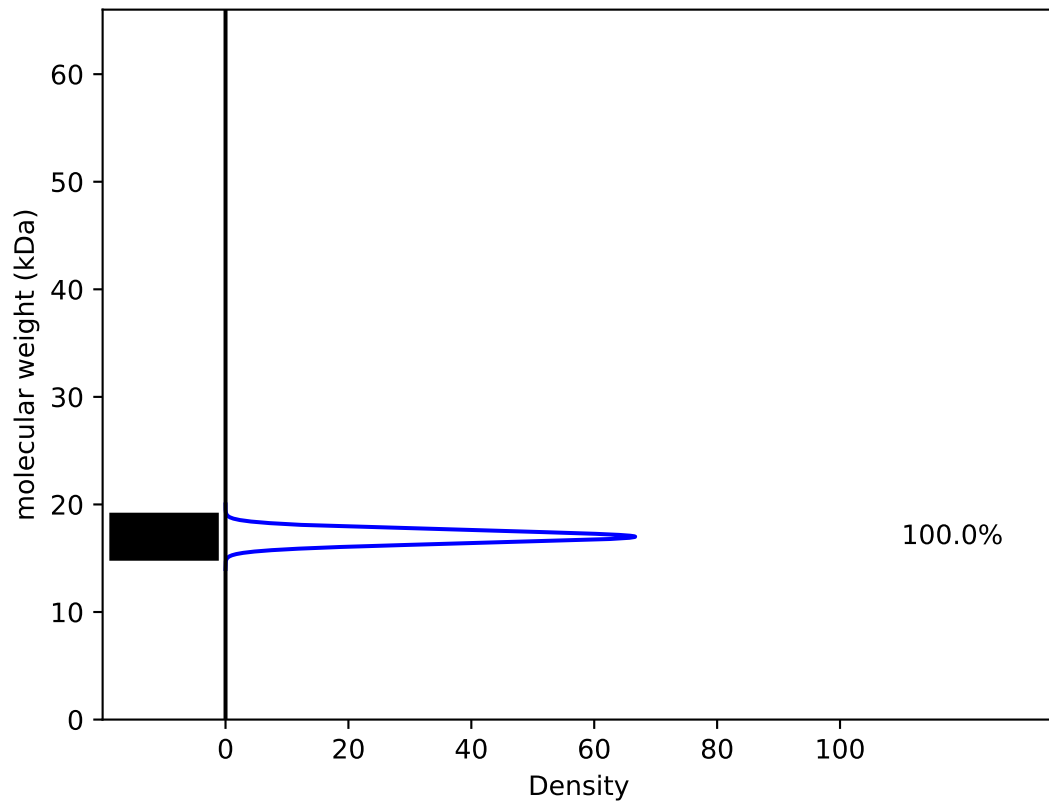

P62277



# P62280

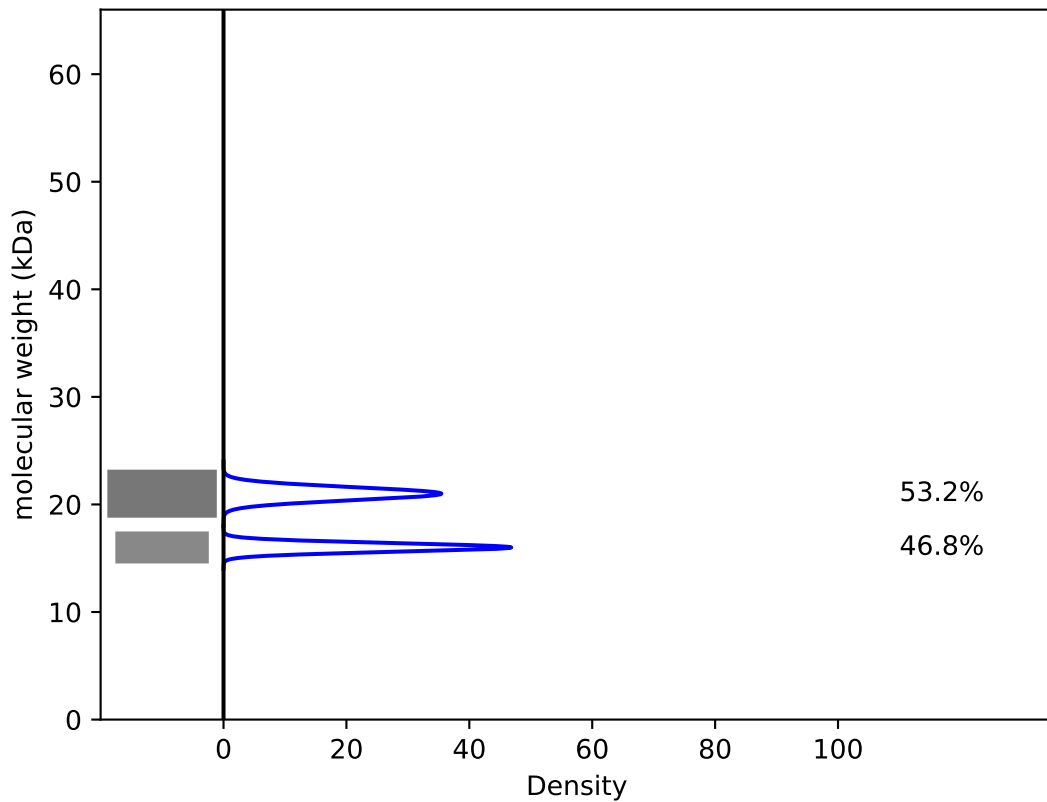

# P62330

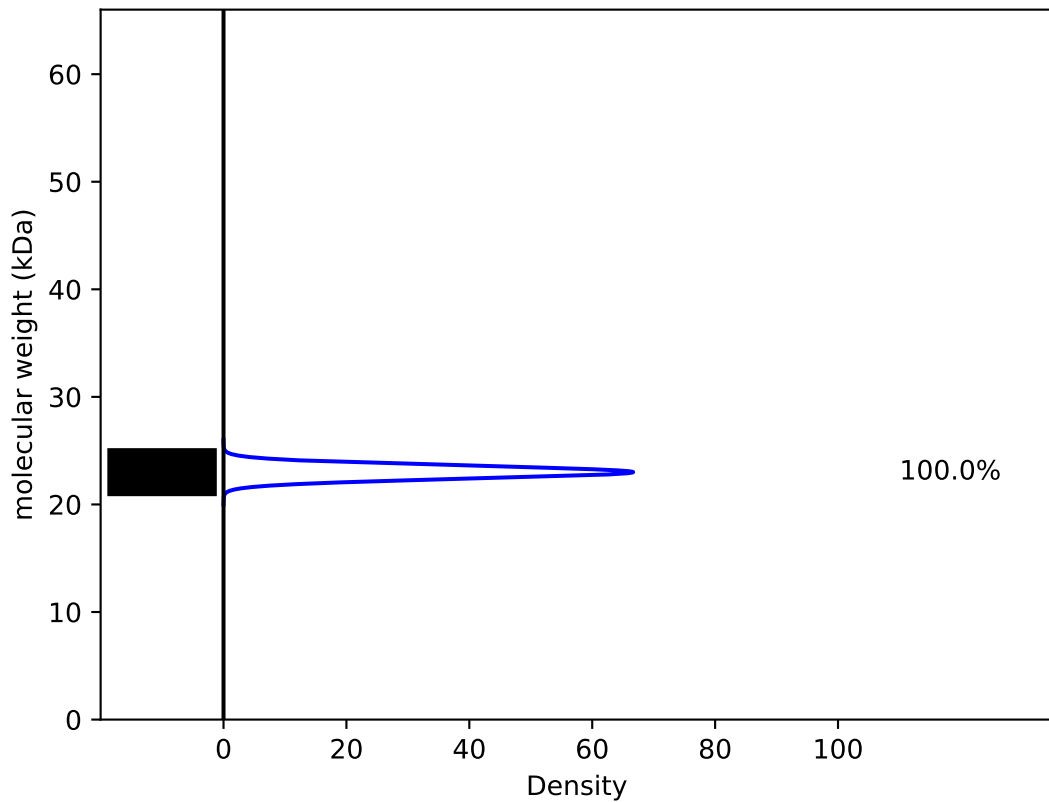



# P62333

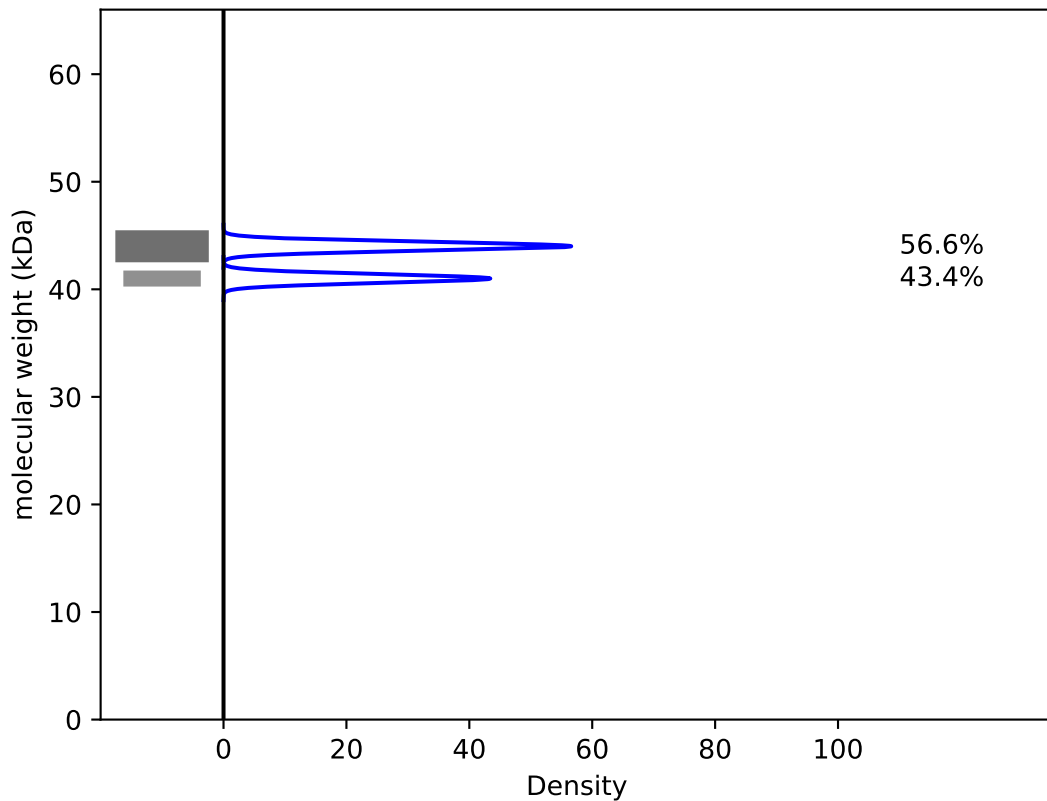

P62424



P62487



# P62495

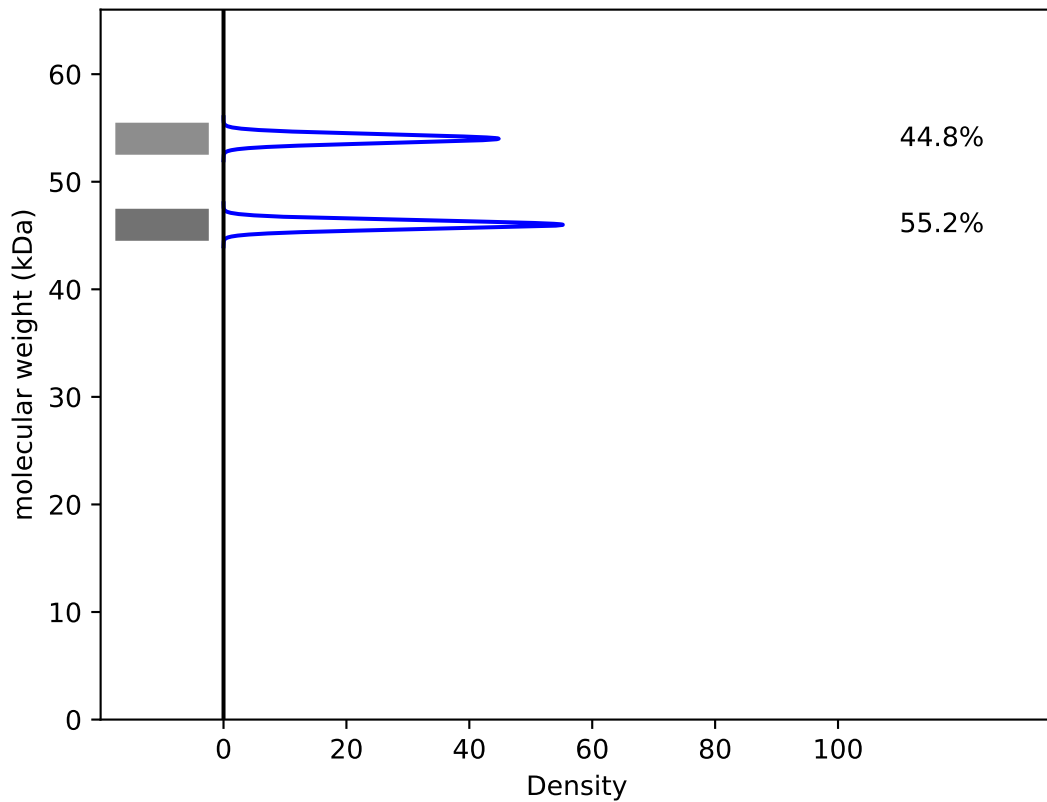

# P62633

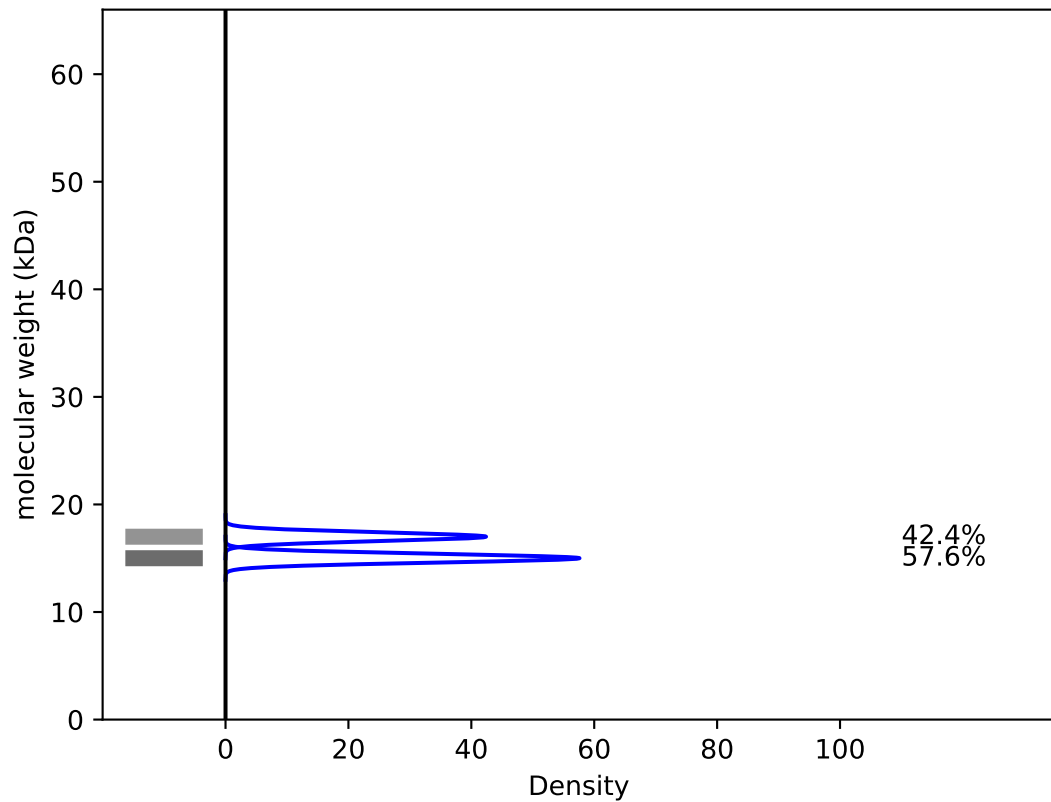

P62701



# Q8TD47



P22090

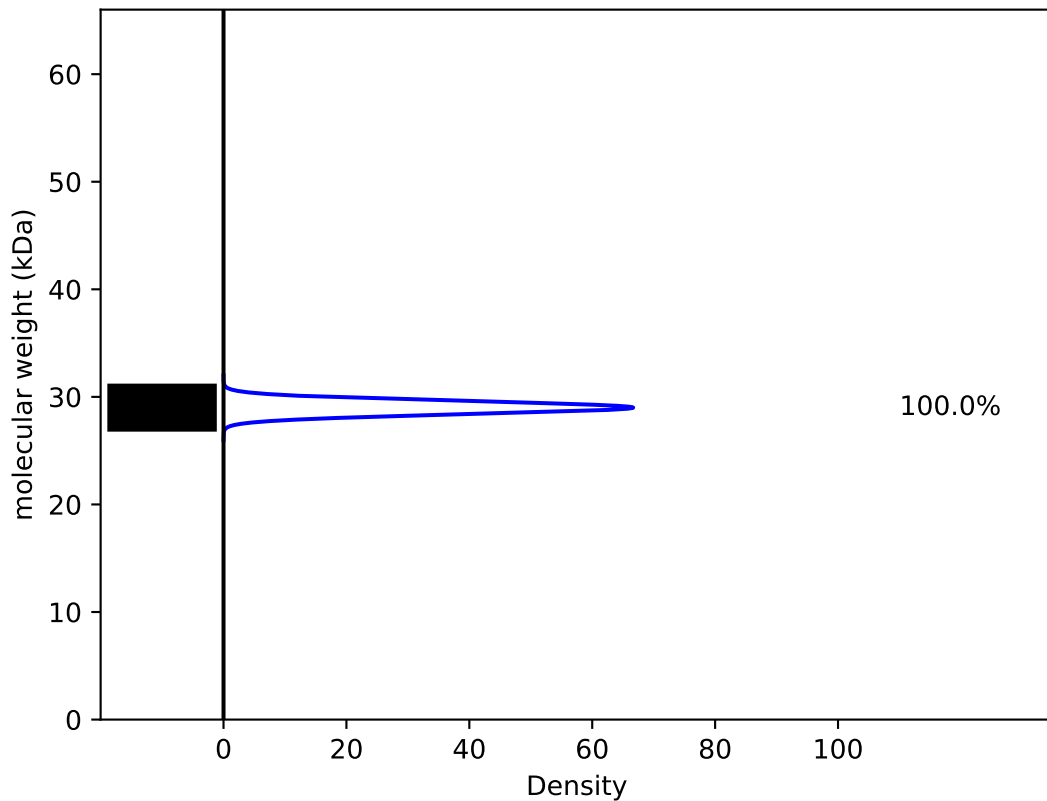



# P67775

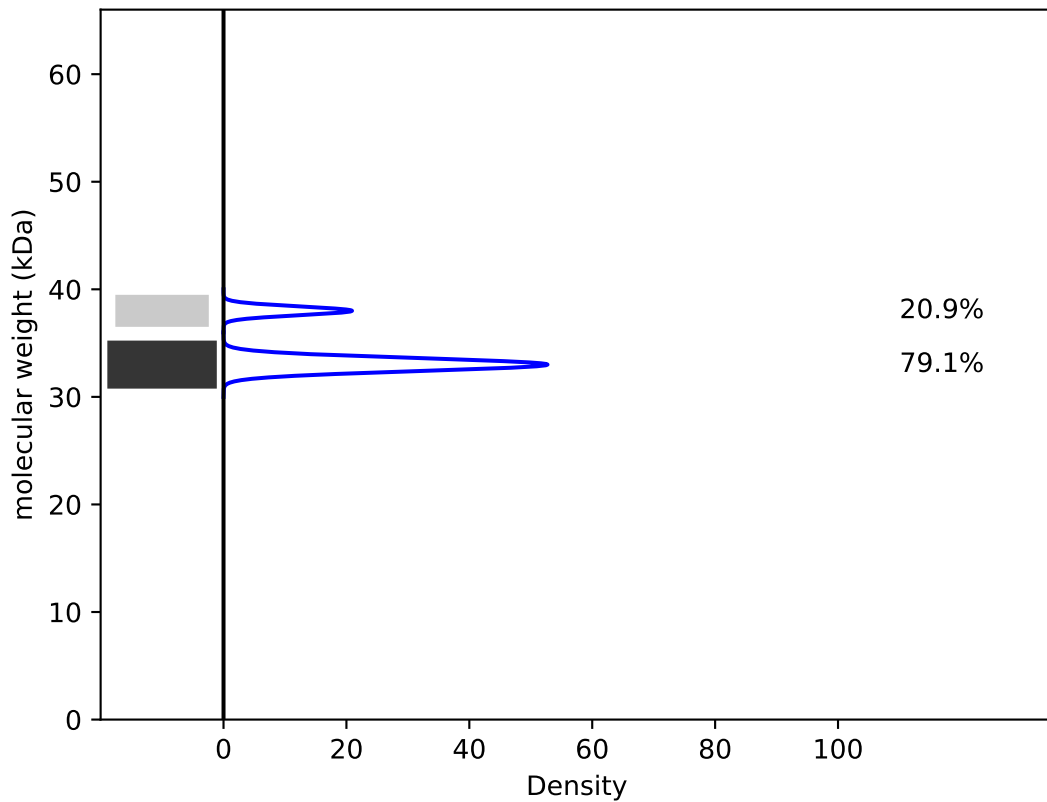

# P62714

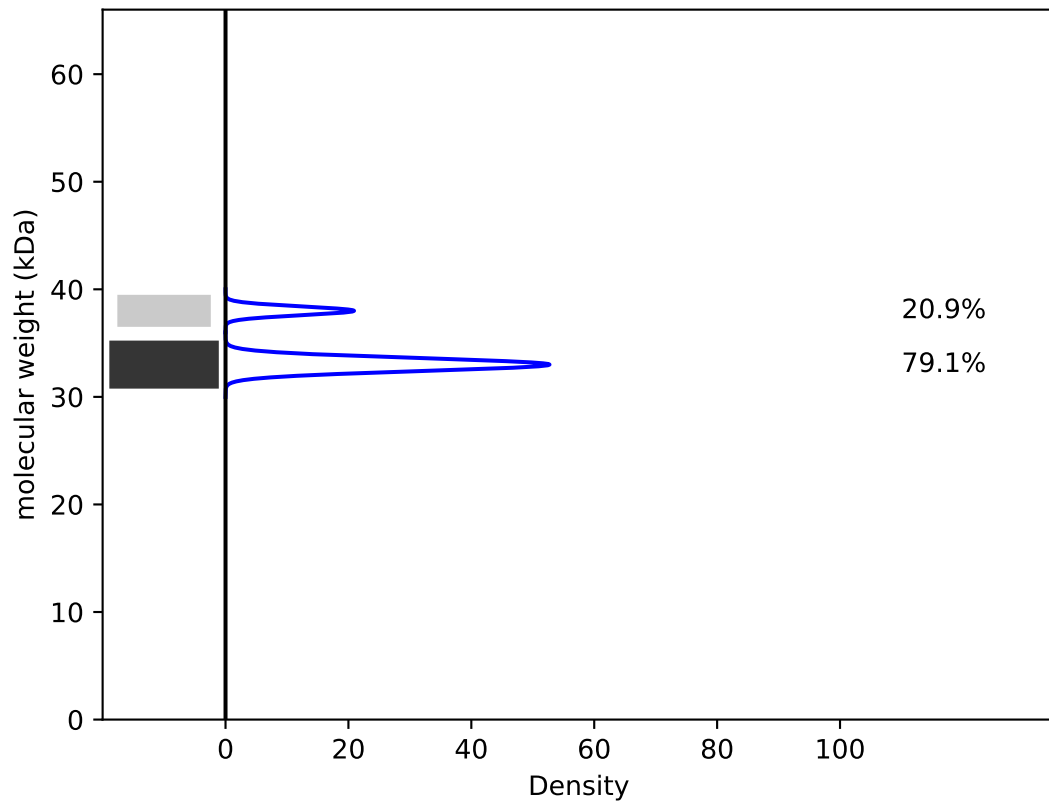

# P62750



# P62753

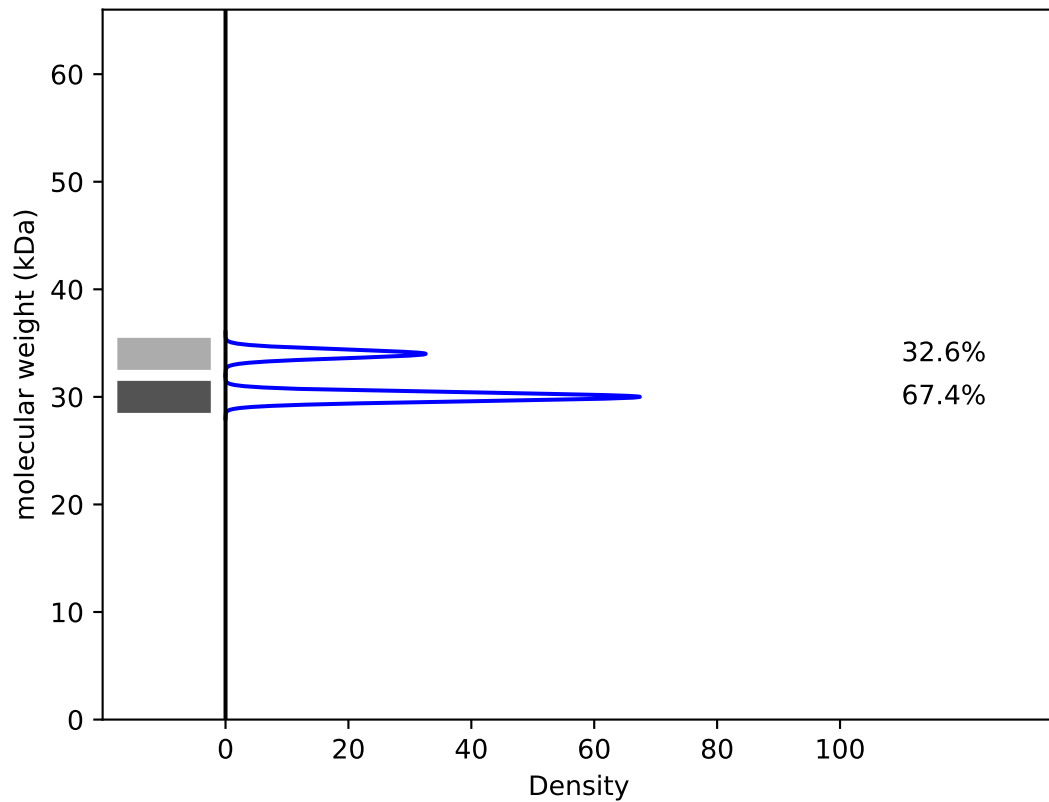

# P62820



# P62826

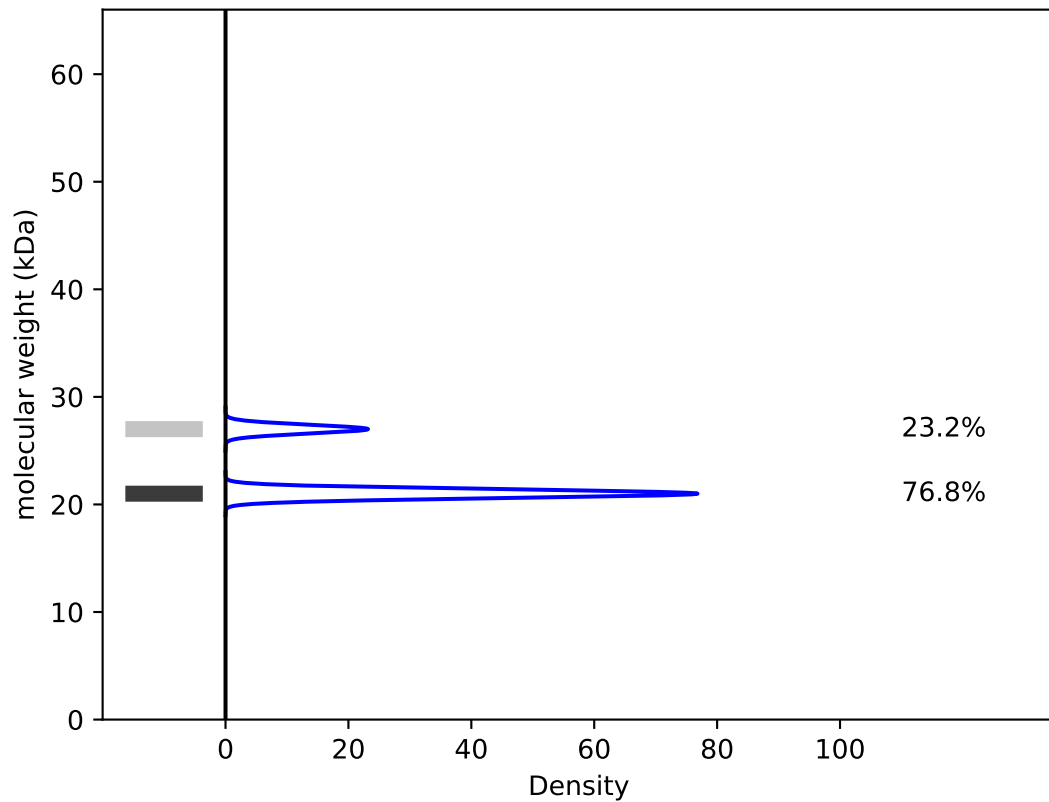

# P62829

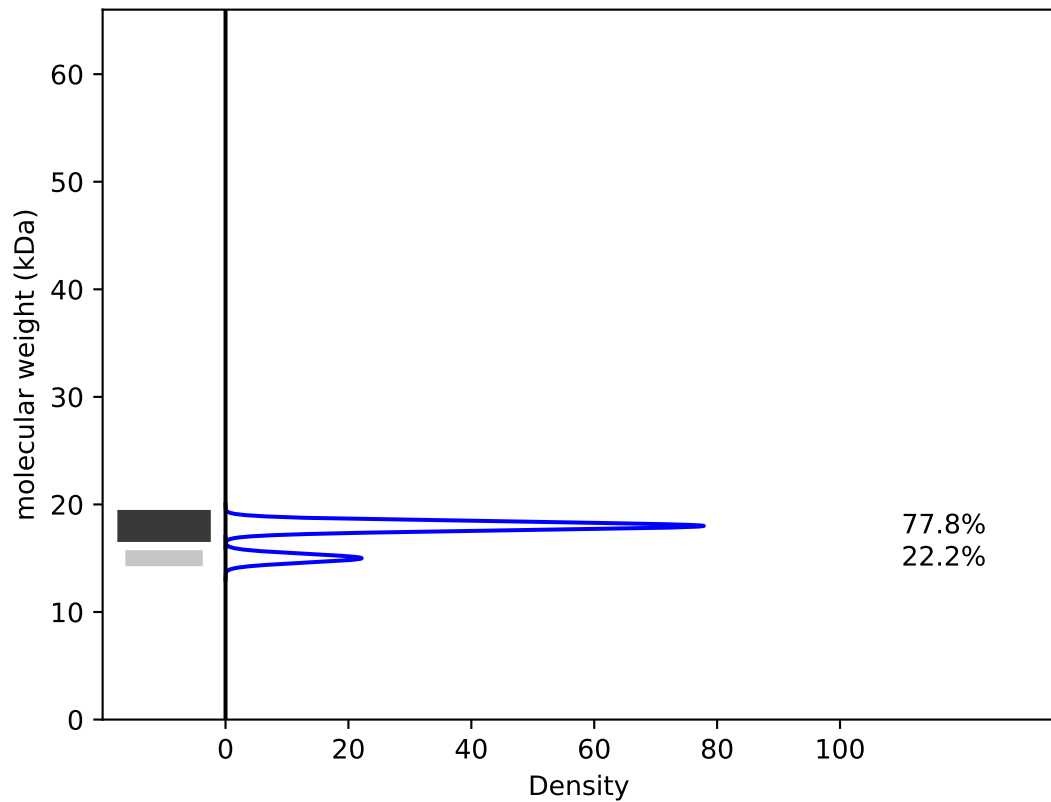

# P62851





P62854



# Q5JNZ5



P62873



# P16520



# P62879



# P62906



# P62910



# P62913

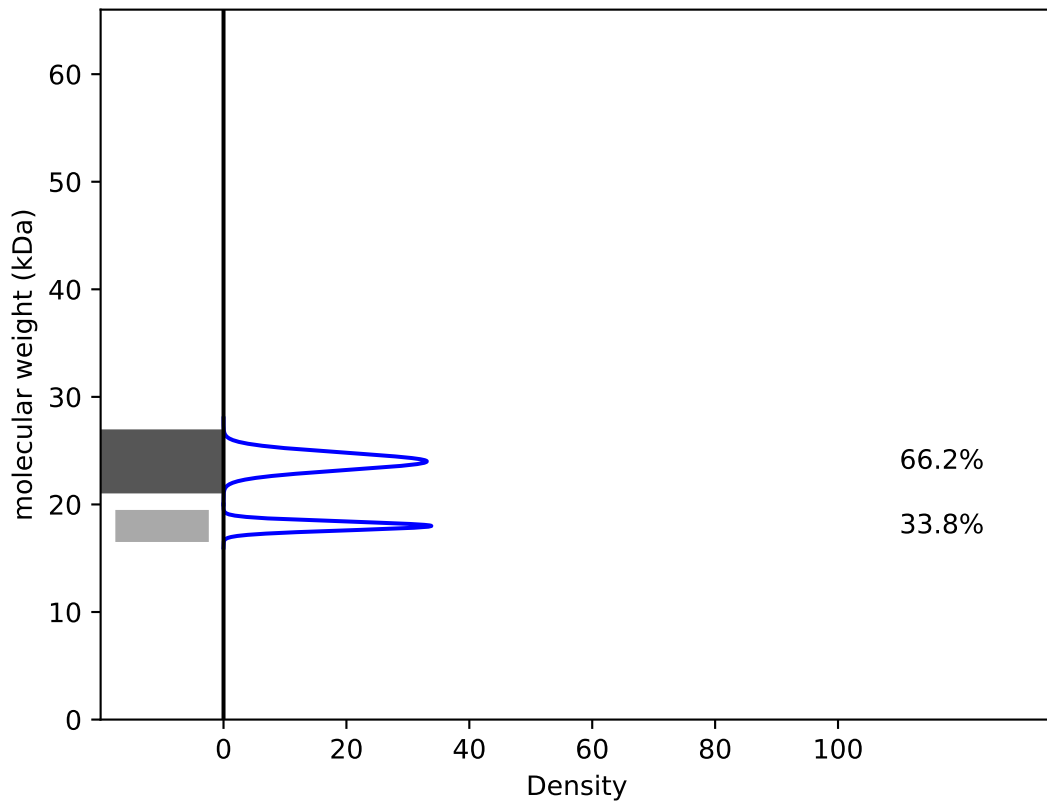



# P62917

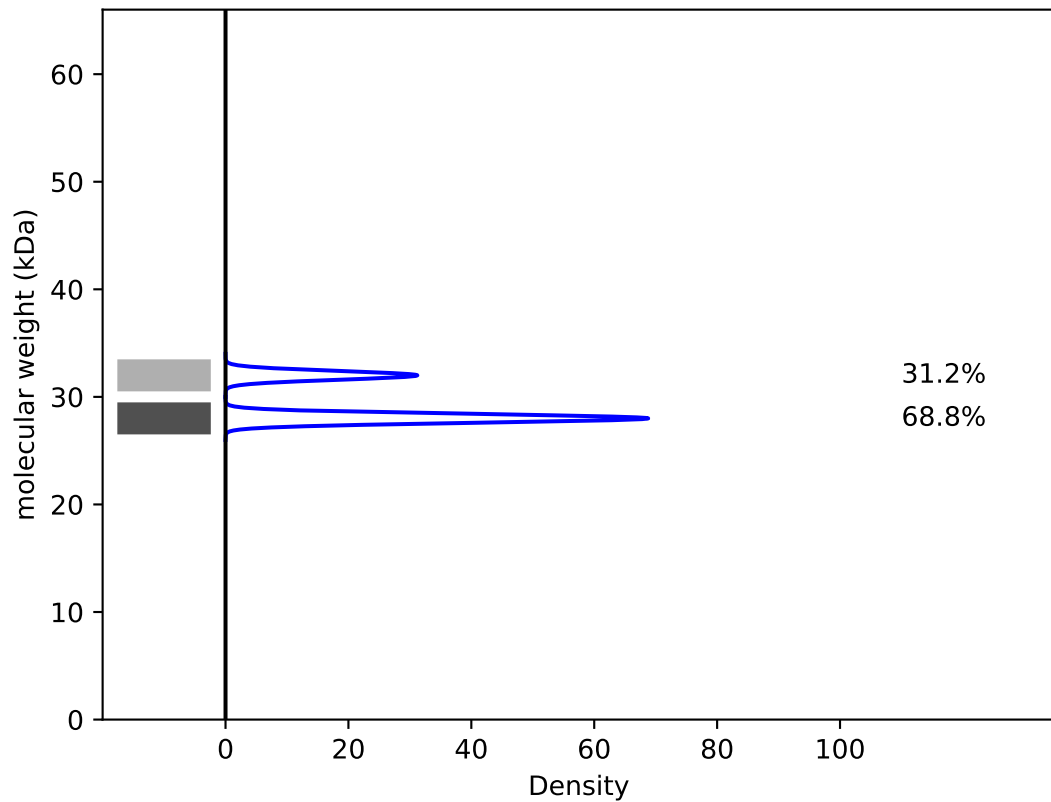

# P62937

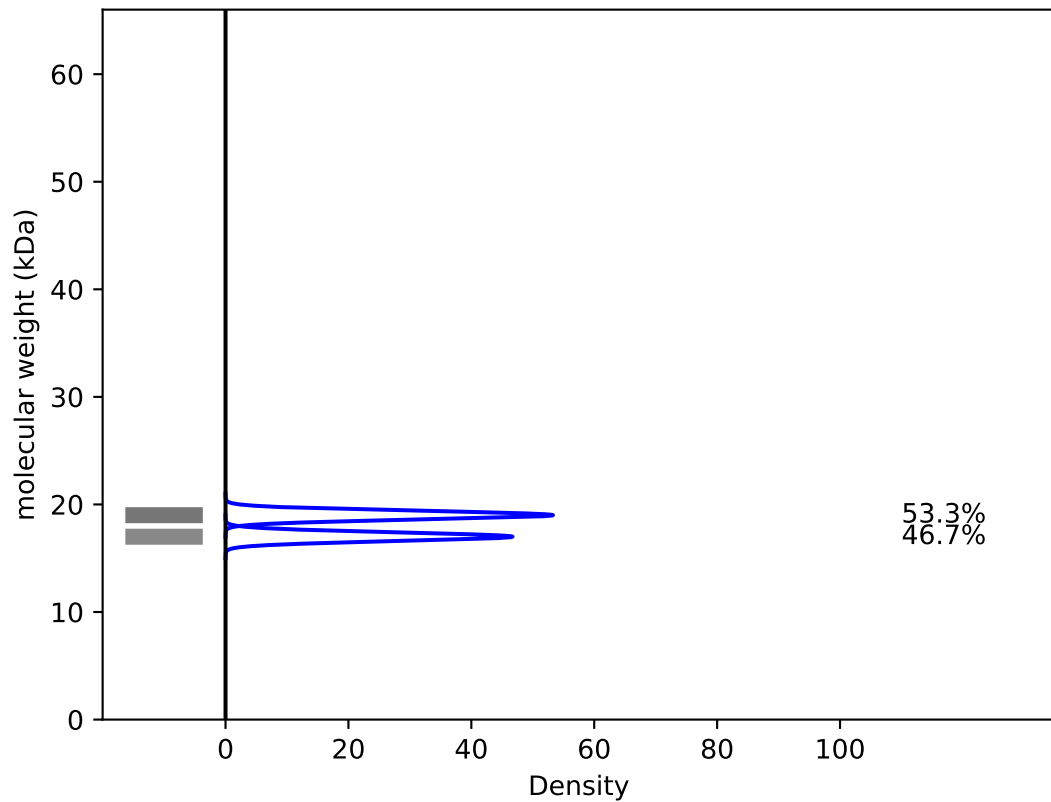

# Q9Y536

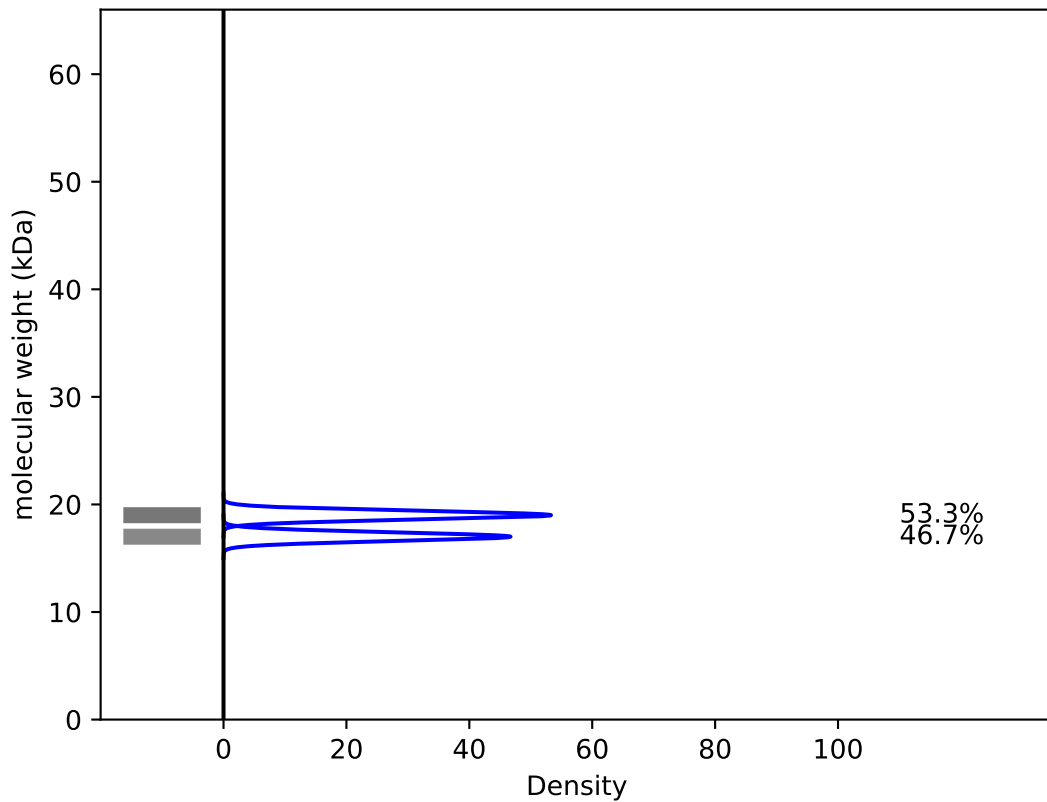

# PODN26



# F5H284



# A0A0B4J2A2

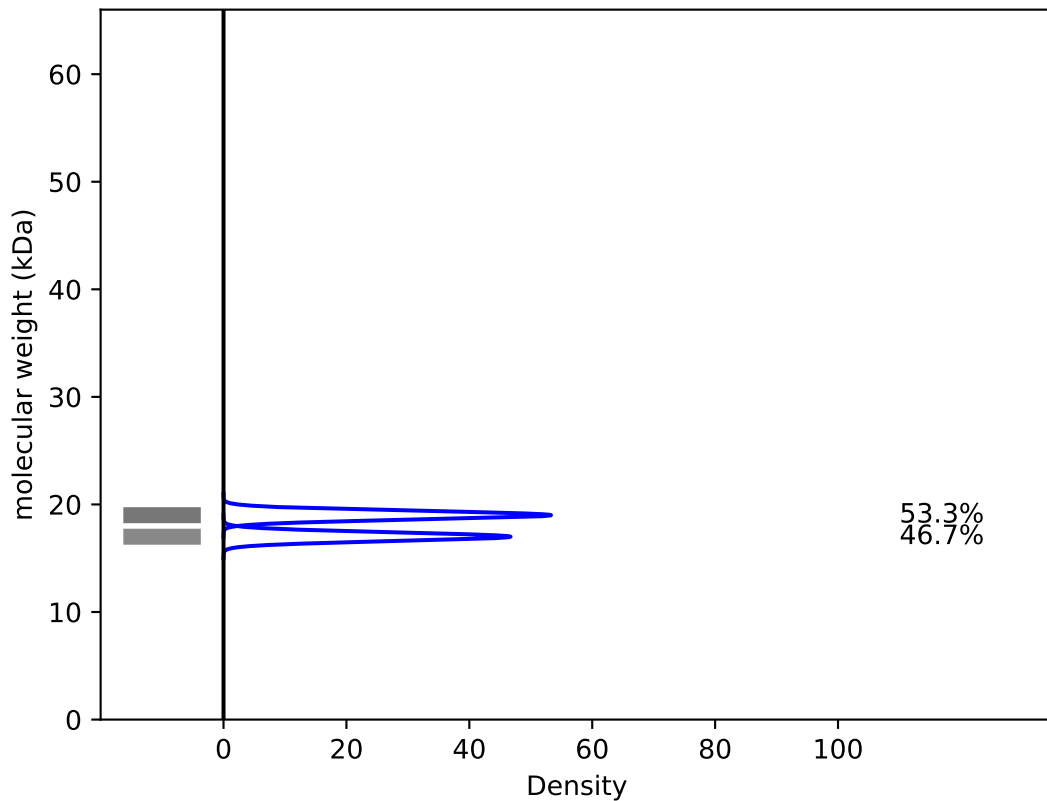

# A0A075B759

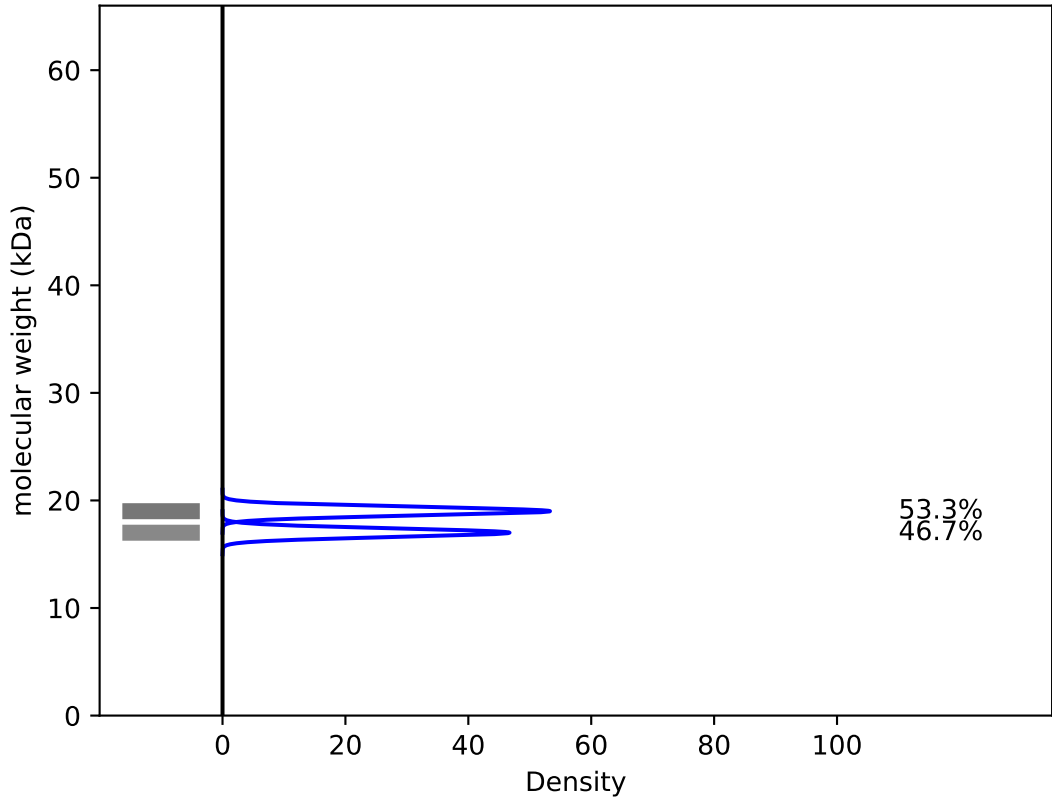

# P0DN37





# P62993



# P62995



# P63000

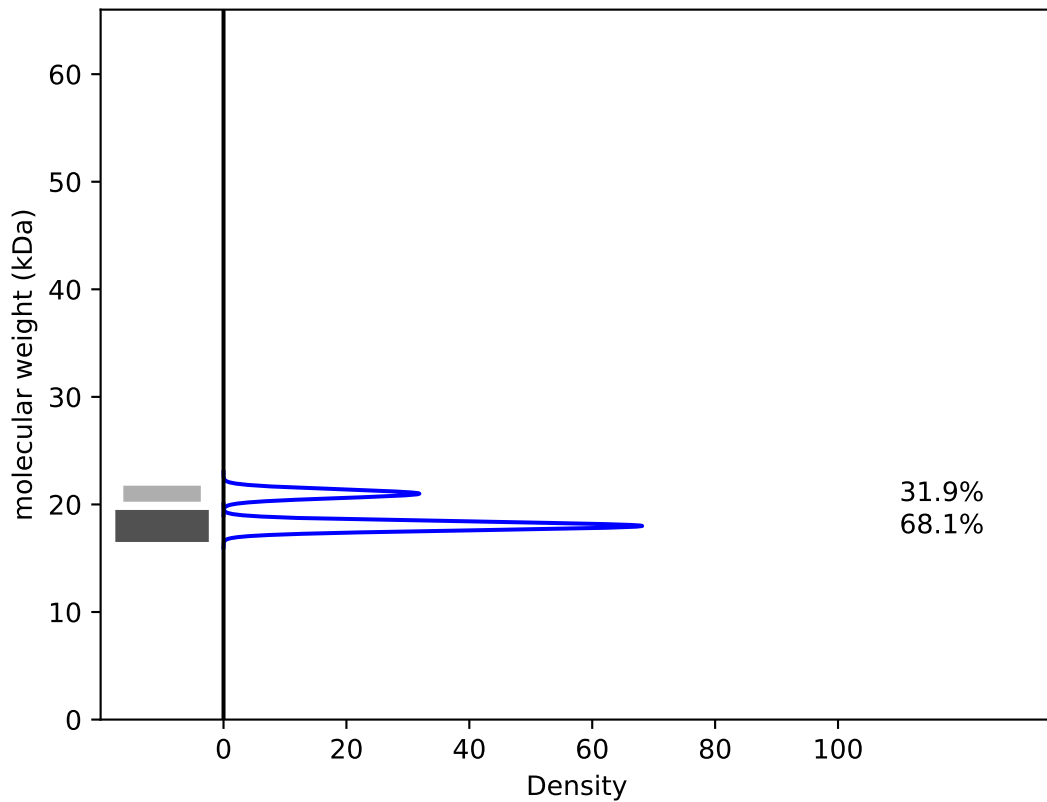

# P60763

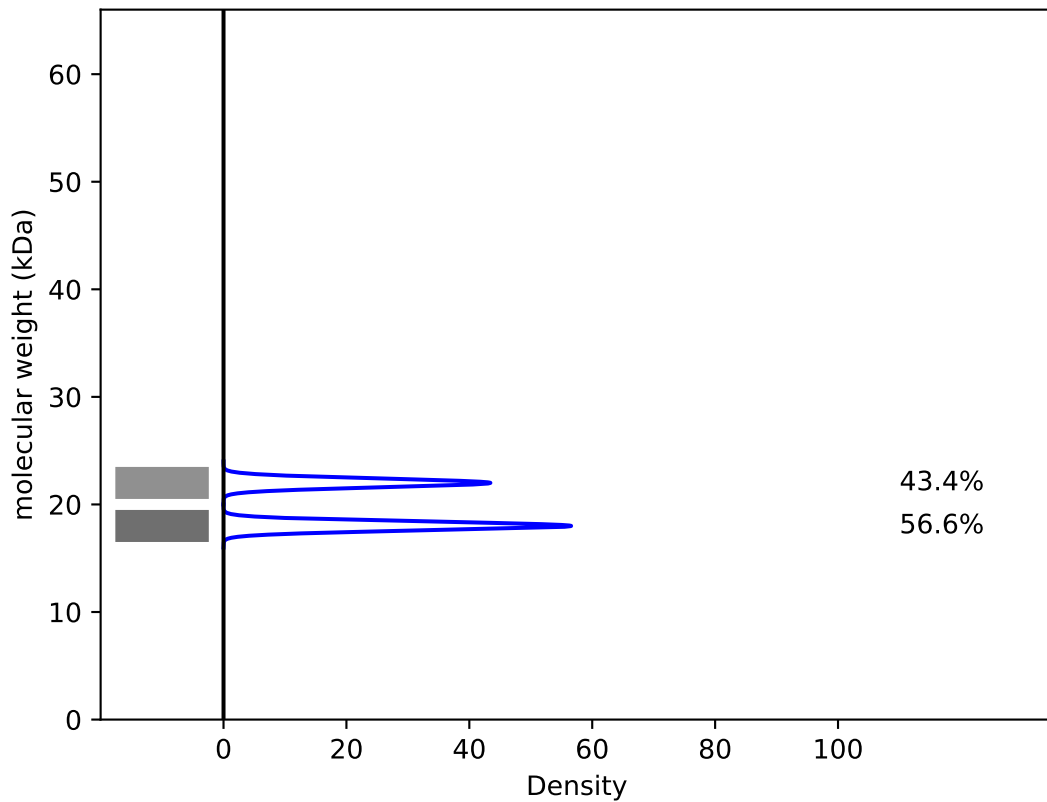

# P15153



P63092



P63104



# P63151

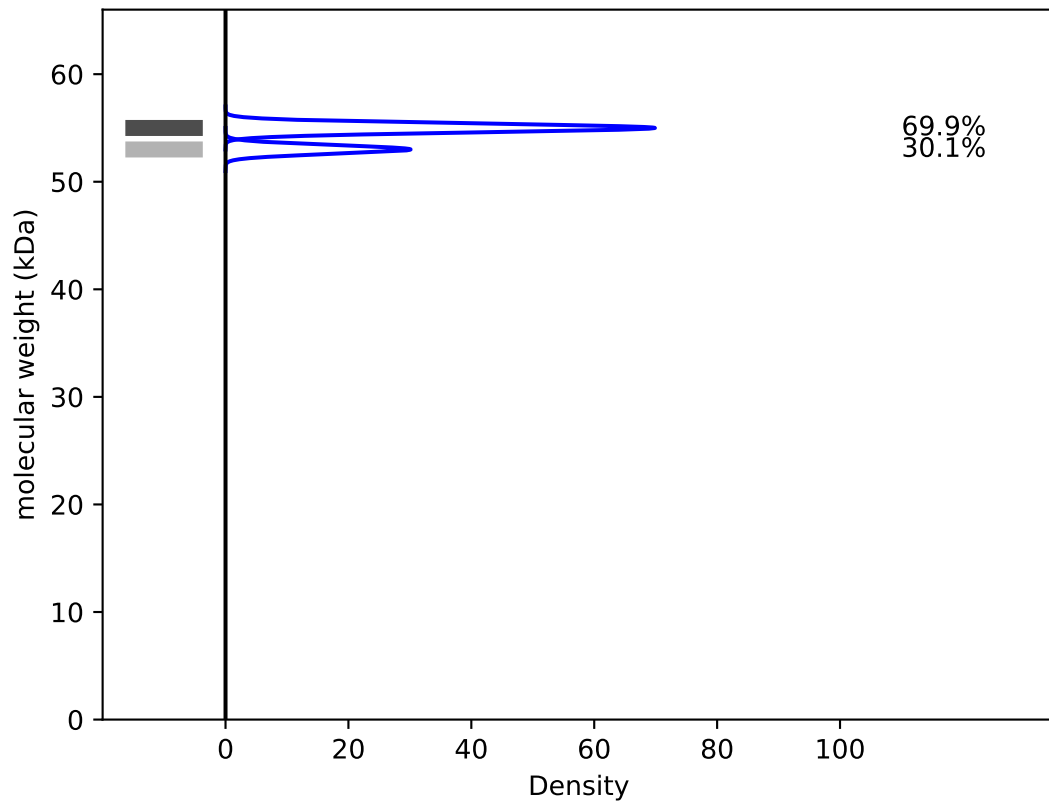



# Q9GZV4

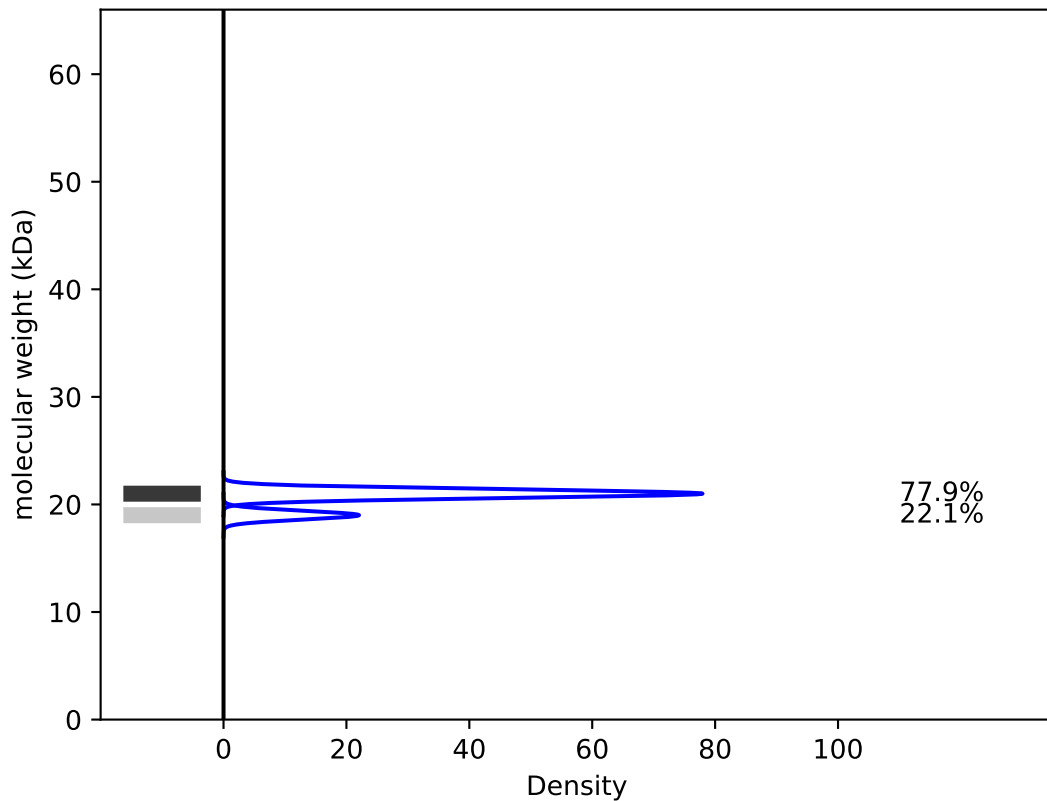

# P63241

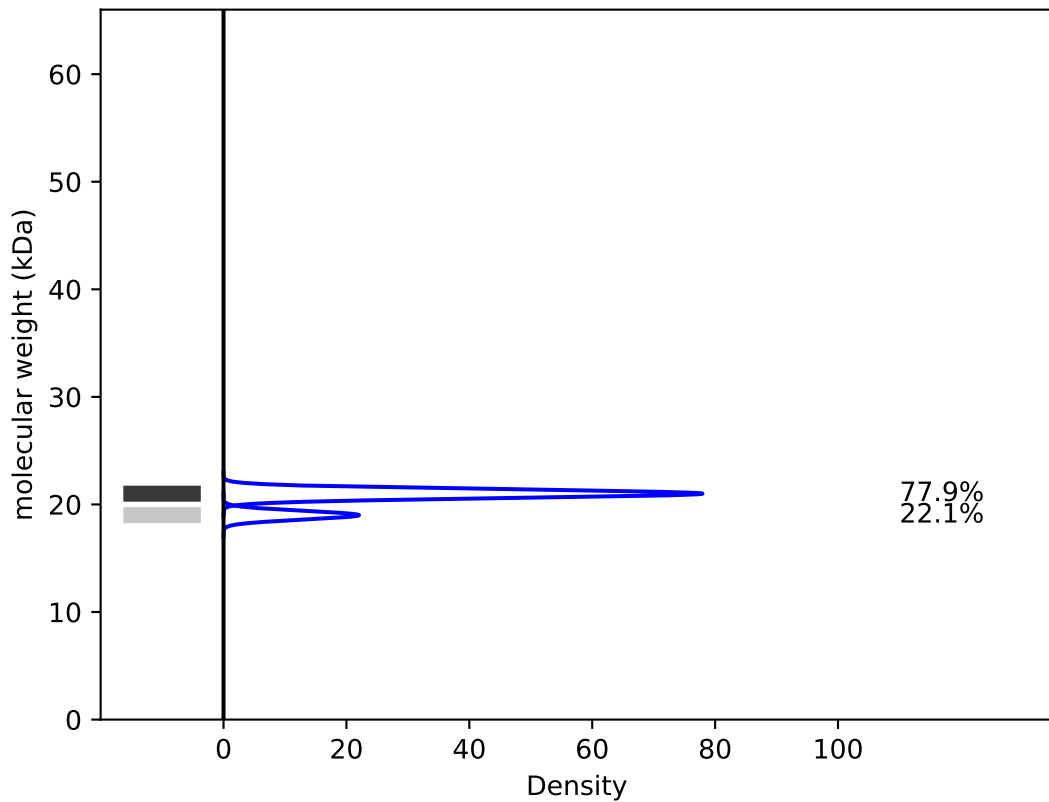

# Q6IS14

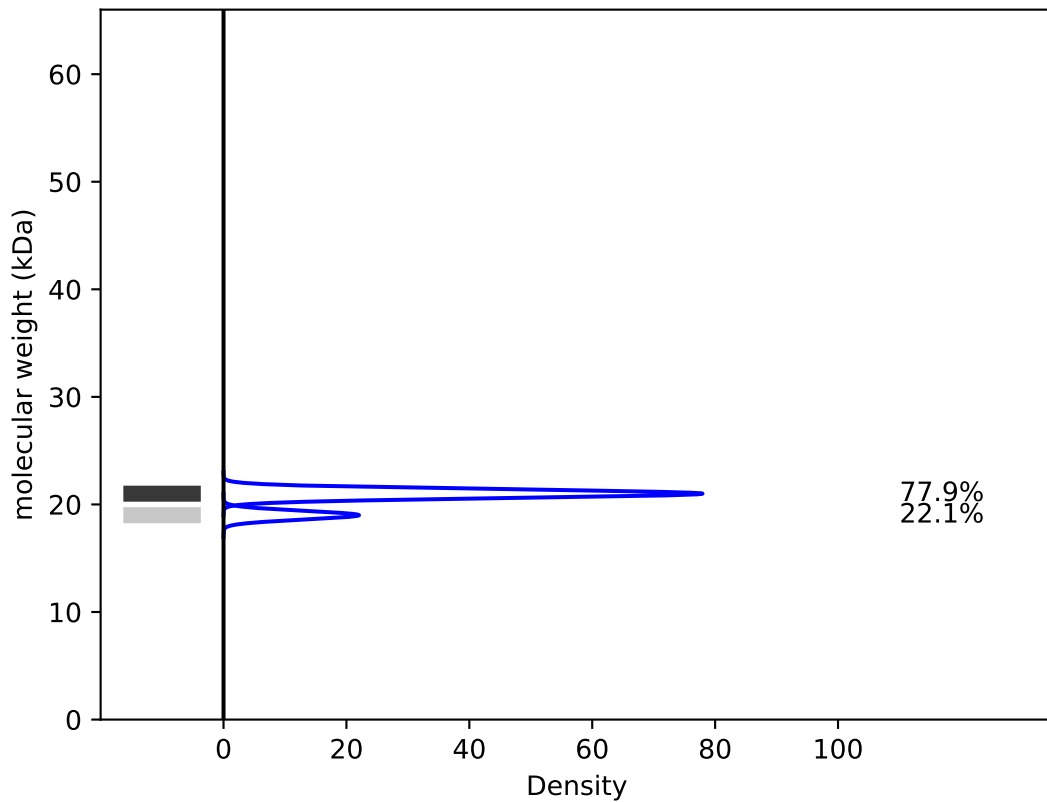

# P63244

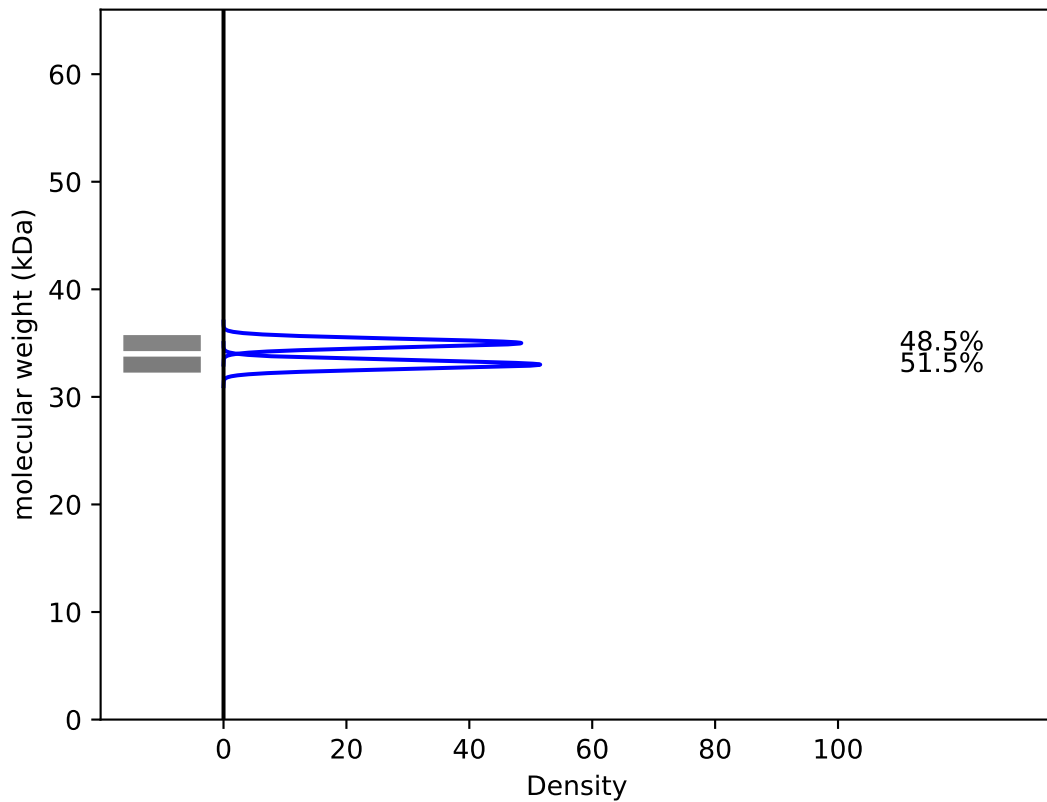

P63261



# P67809

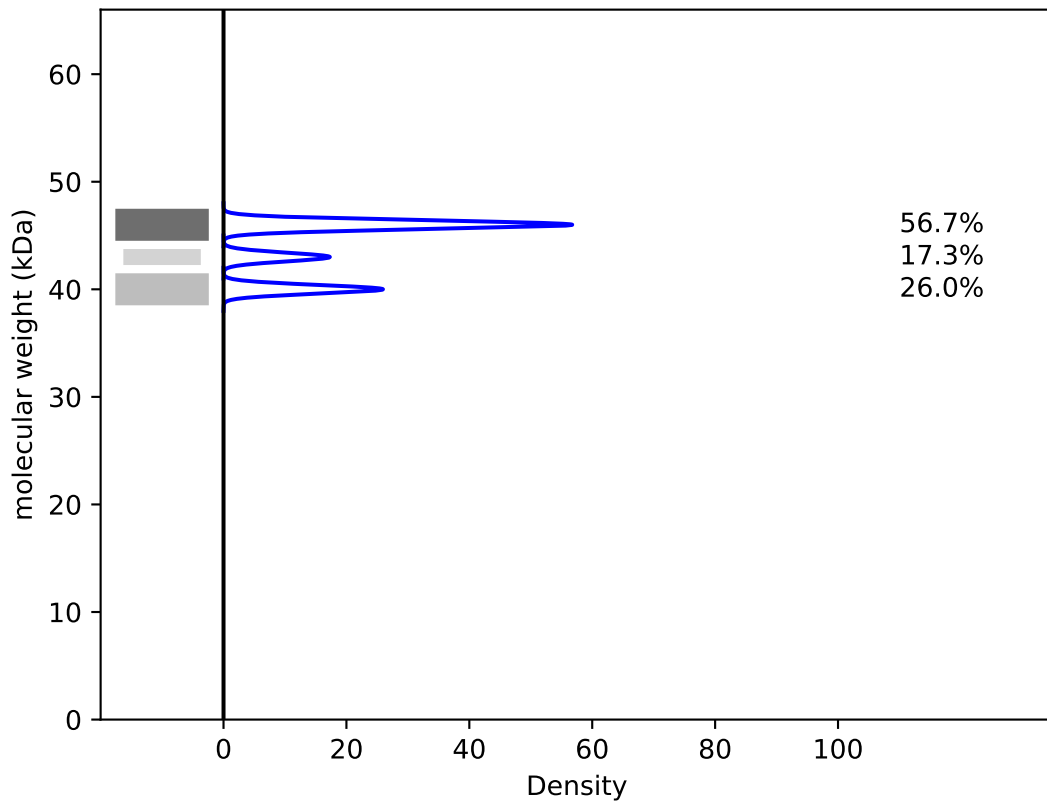

# P67870

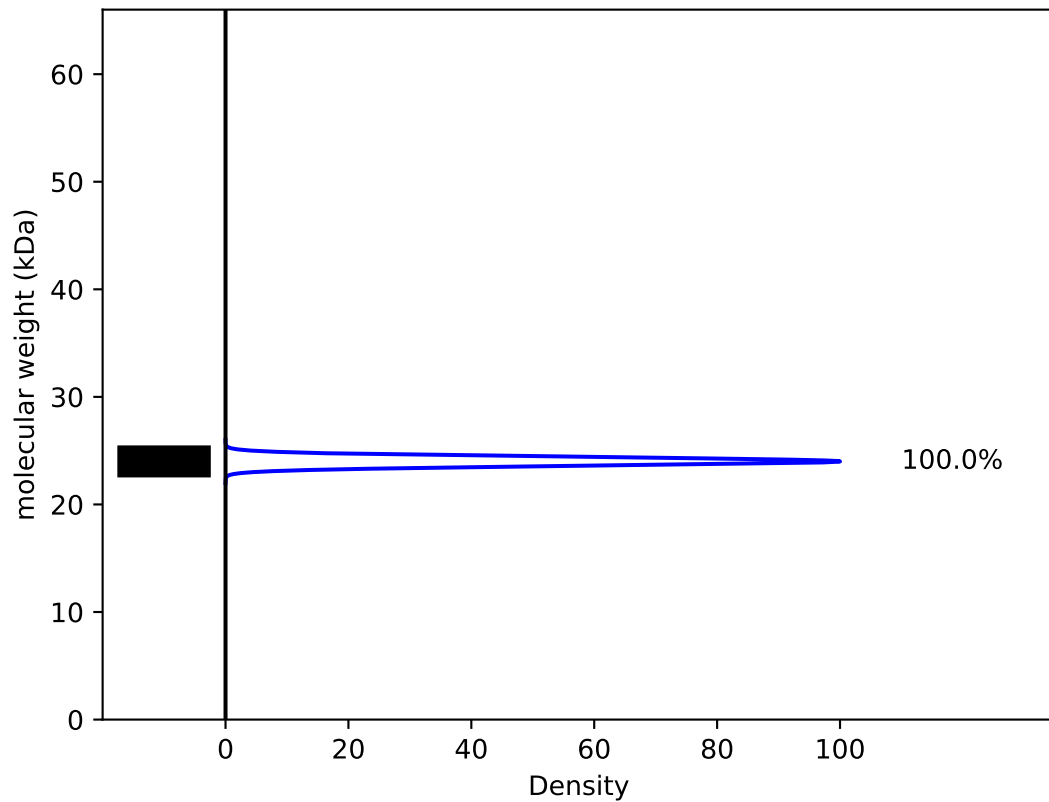

# P67936

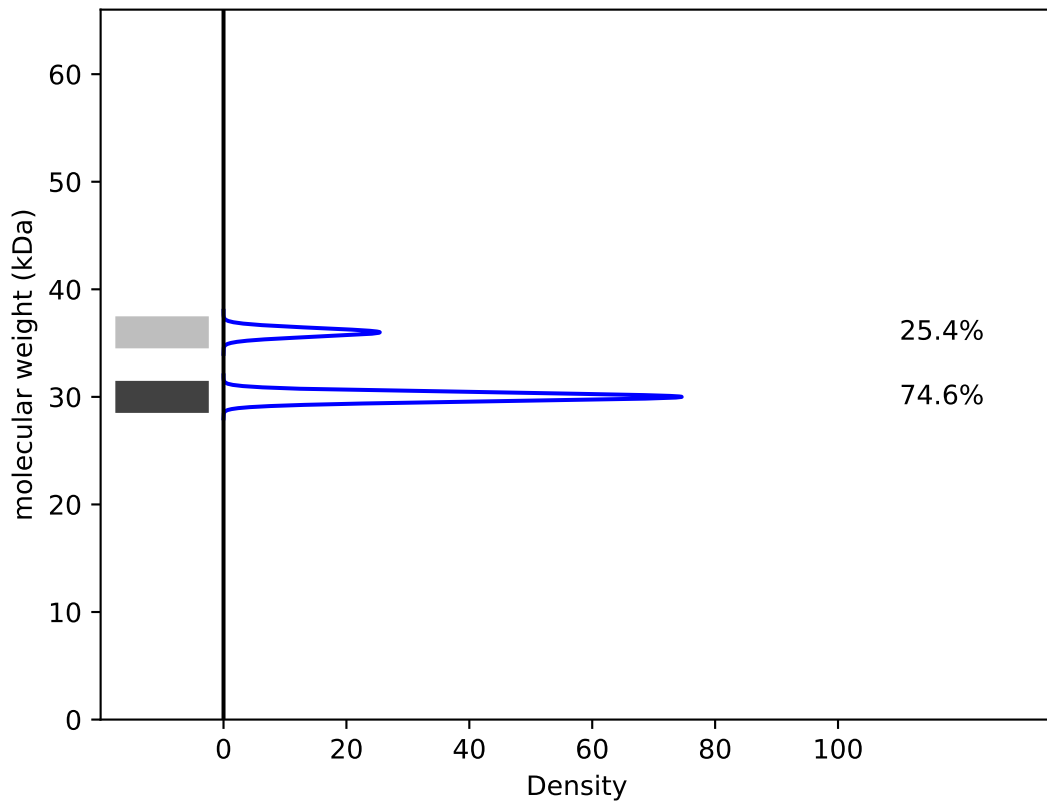



P68032



P68133



P63267



P62736



# P68104

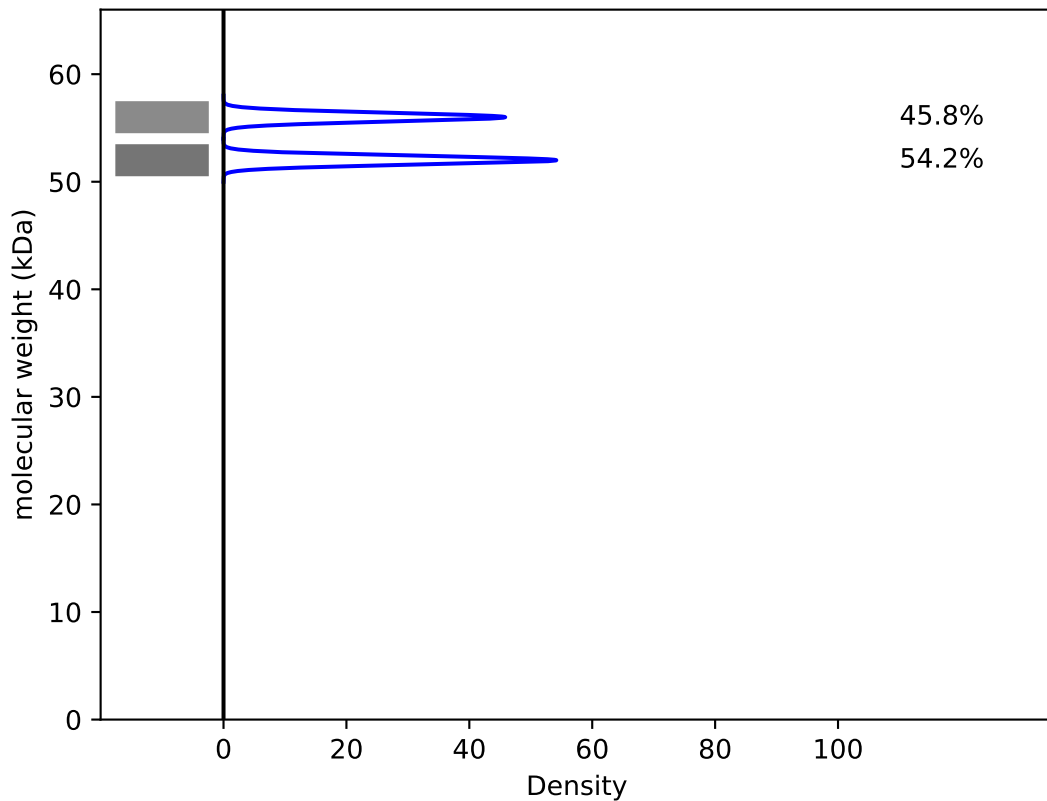

# Q5VTE0

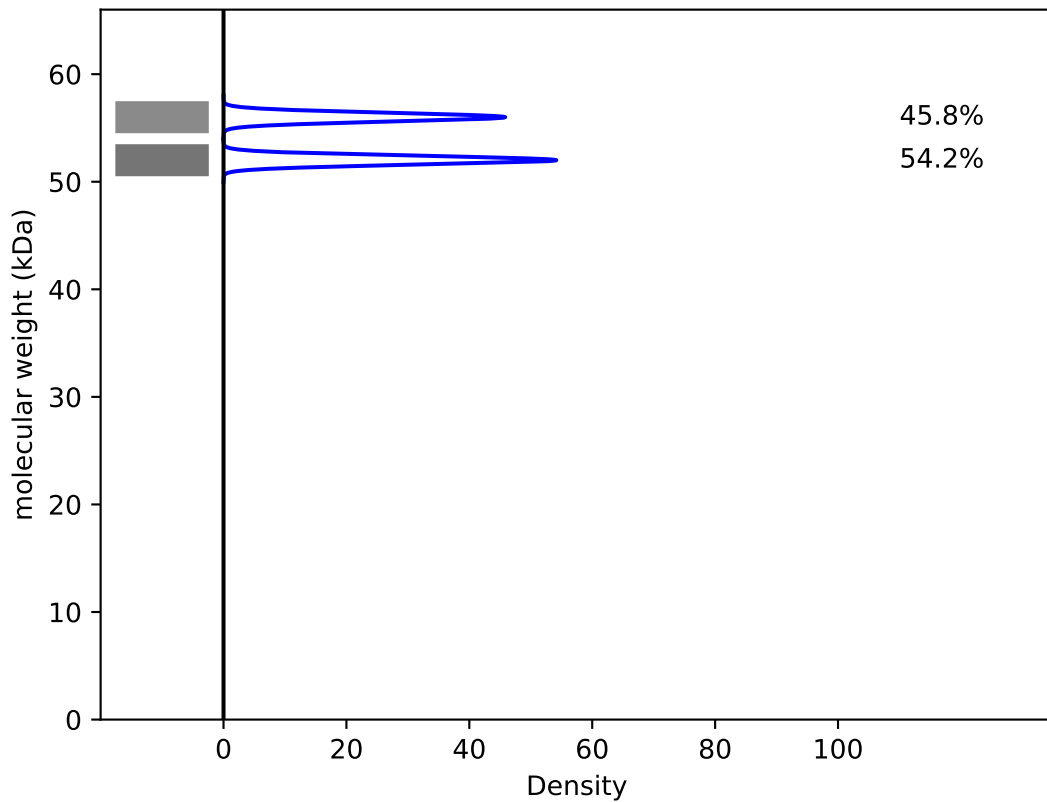

# P68363

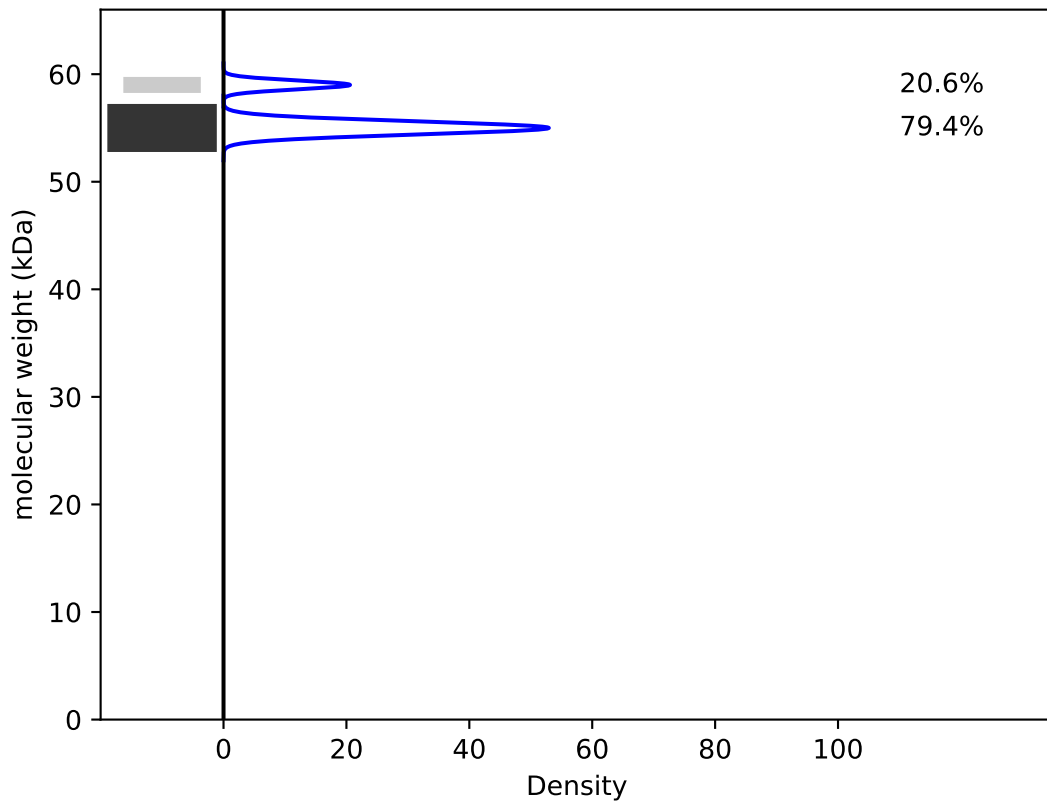

# P68366

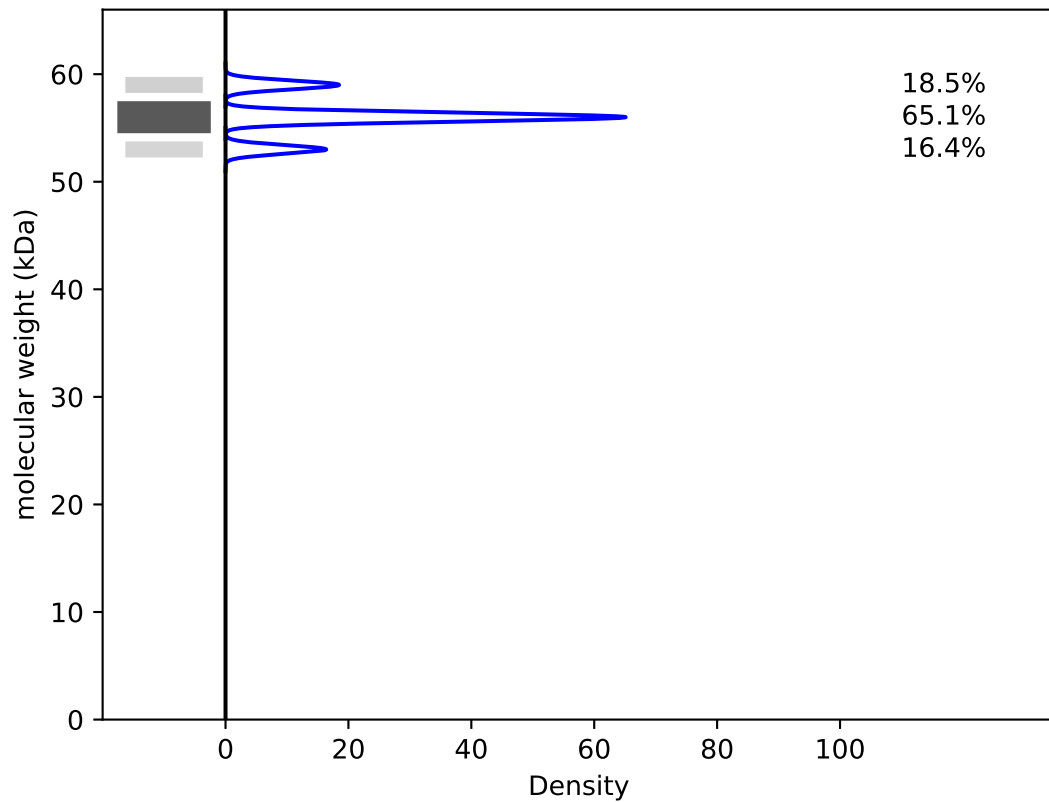



# P68371

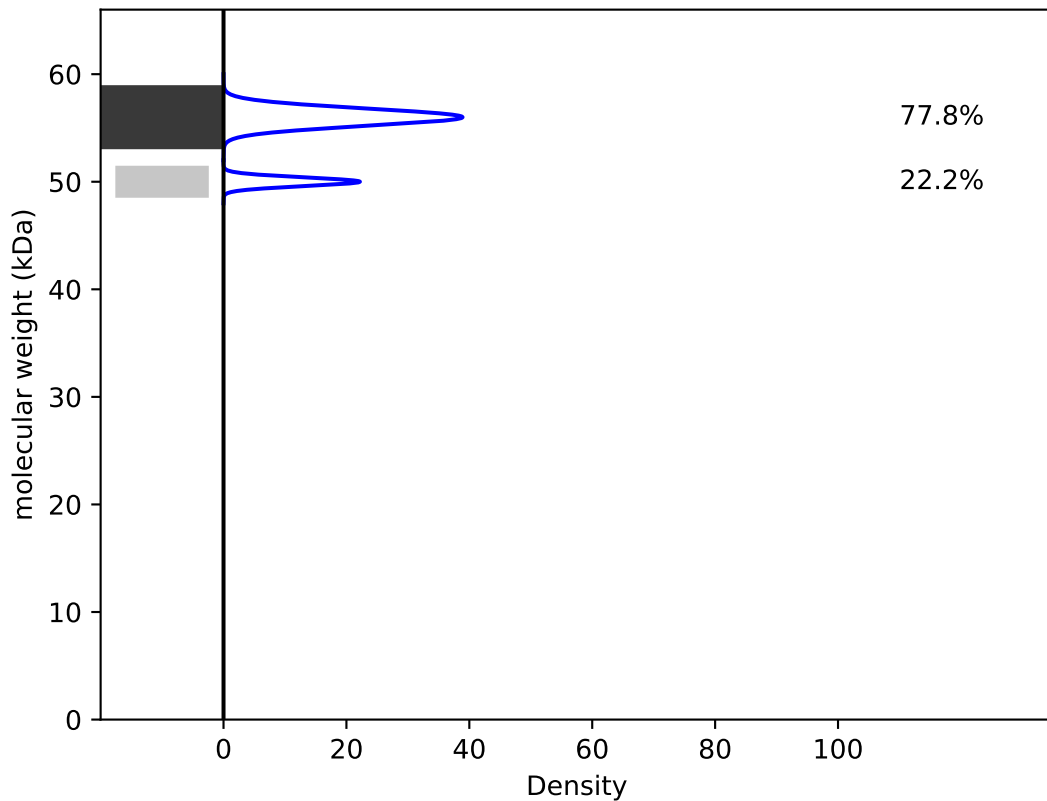

# P68400



# Q8NEV1



P68402



# Q71DI3

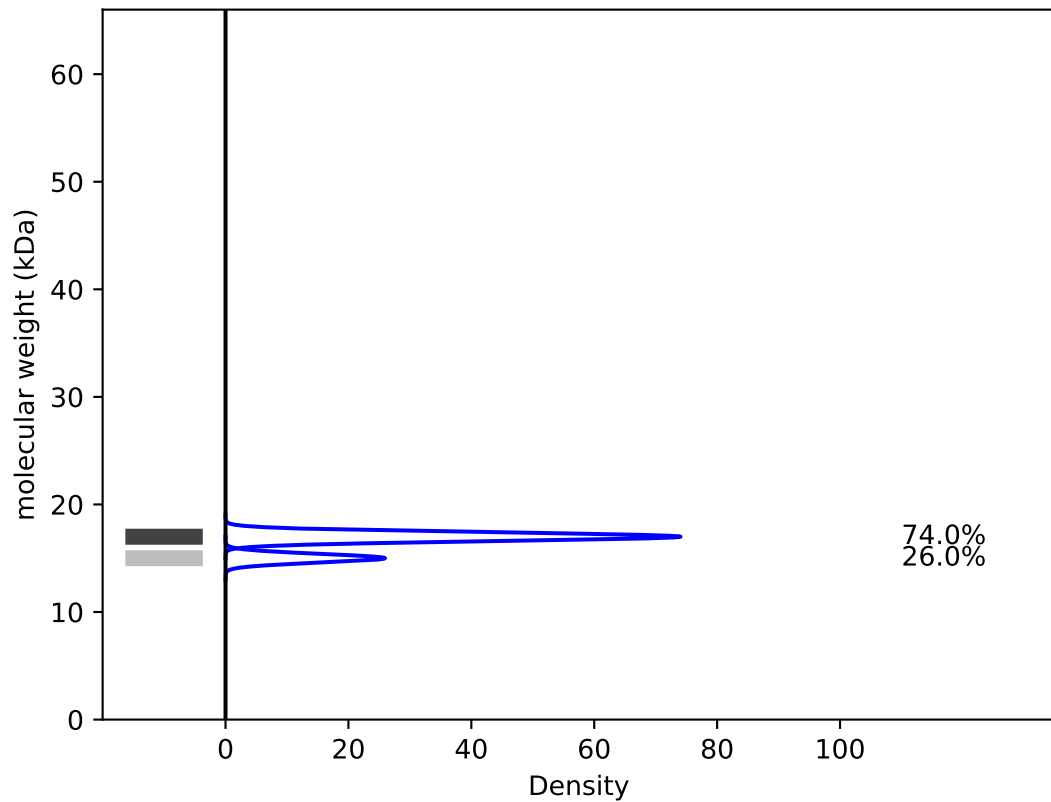

# Q16695



P84243

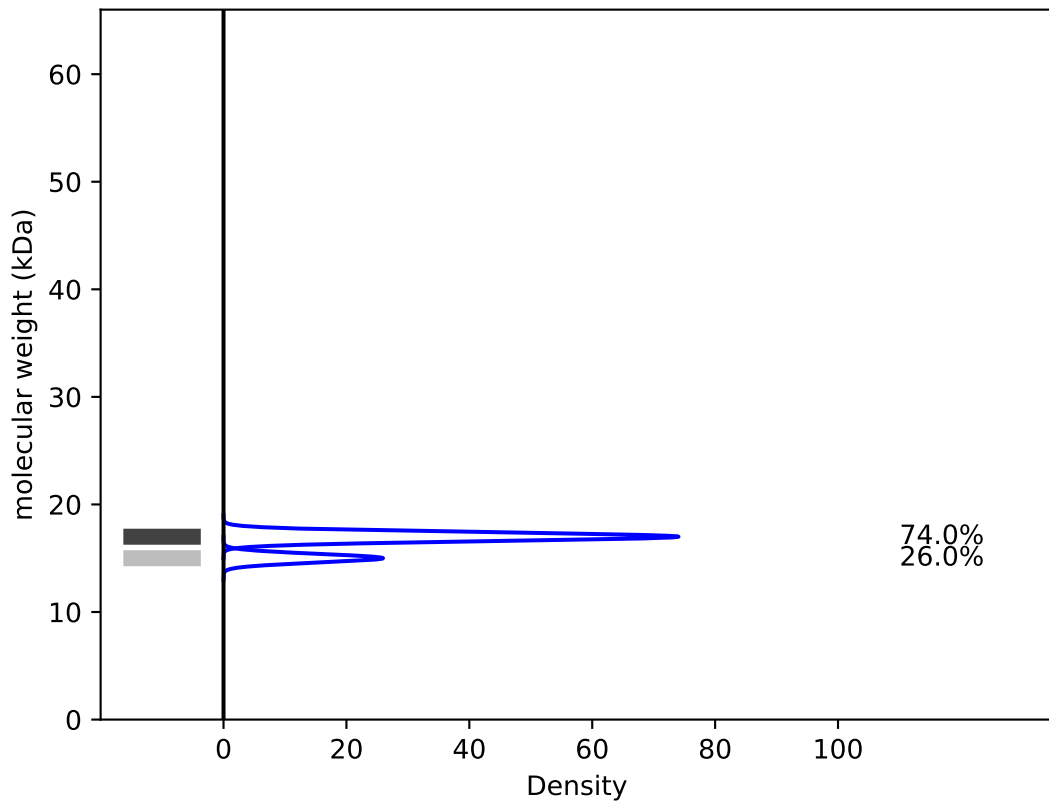

P68431





# Q6NXT2



# P78318



# P78330

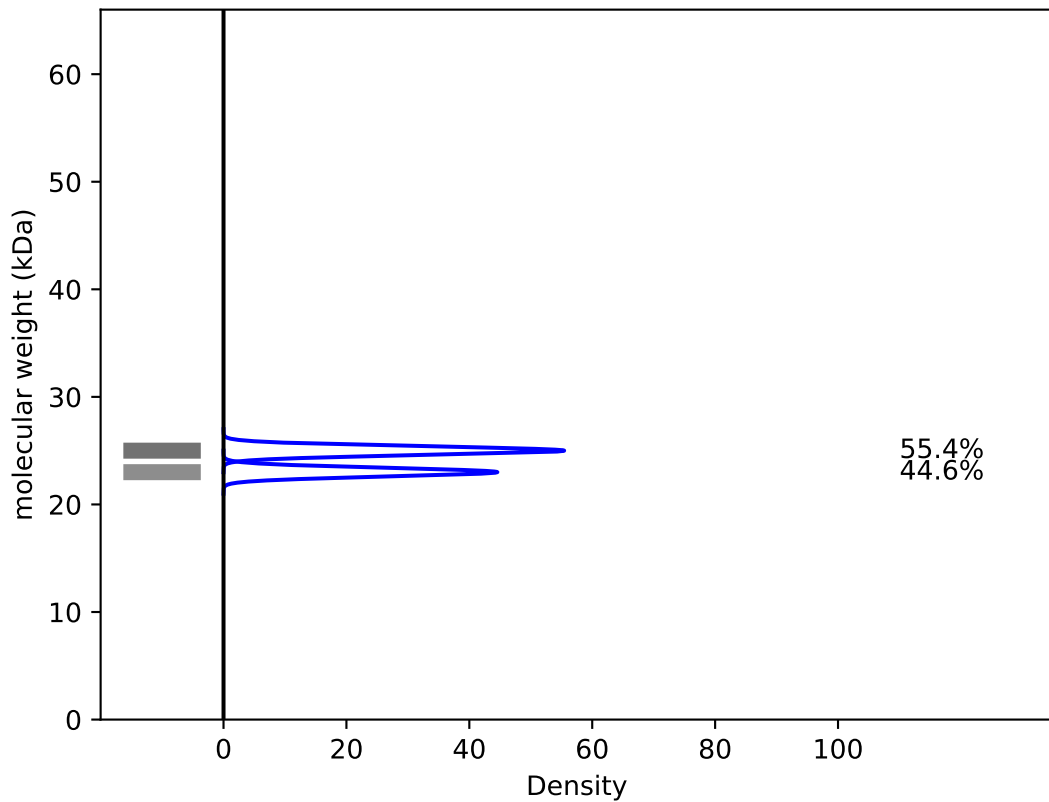

# P78346

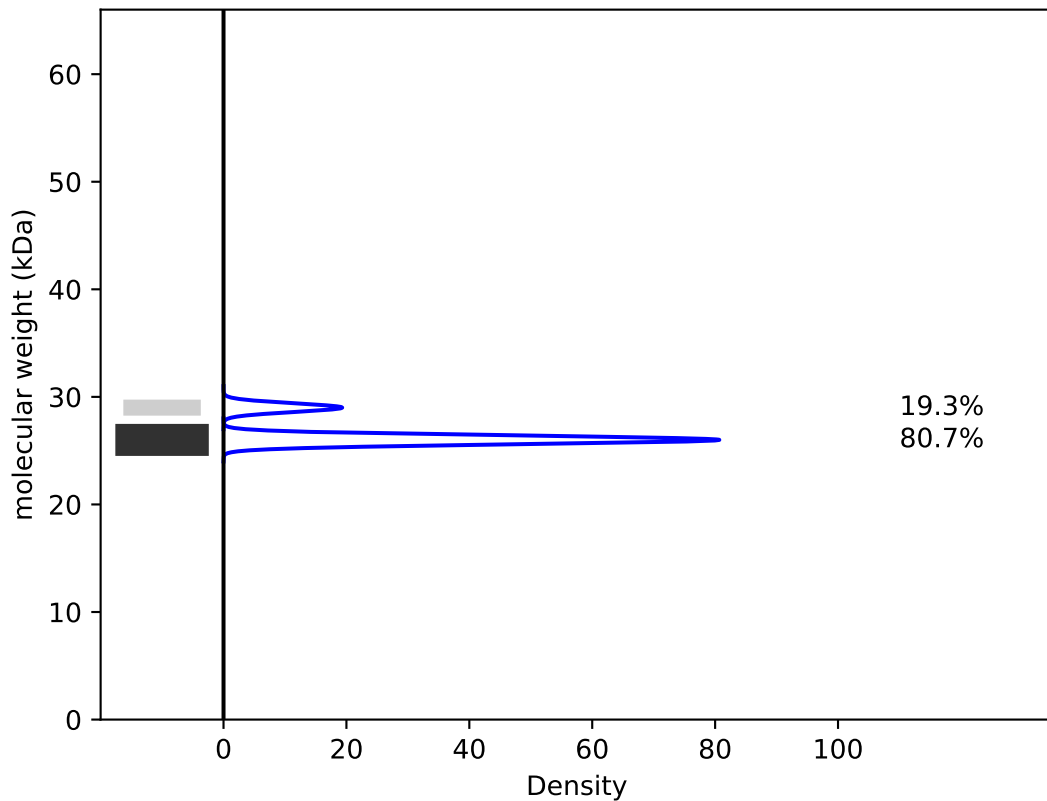

P78371



# P78406

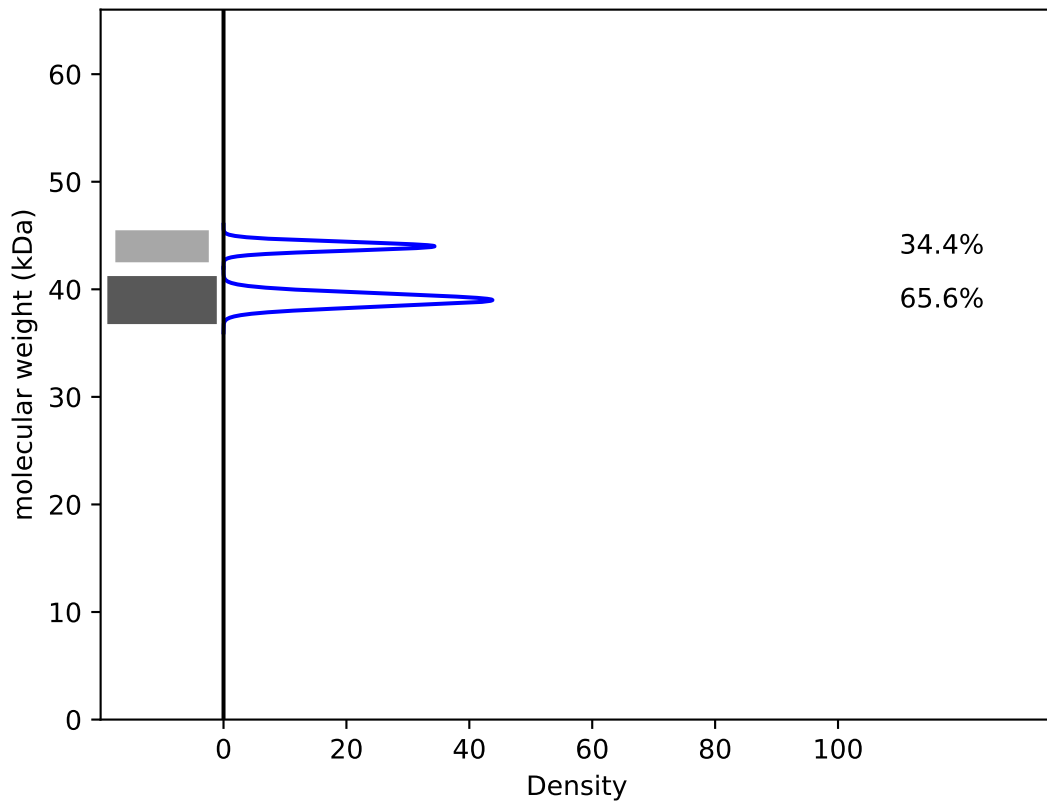

P78417



# P82650





P82663

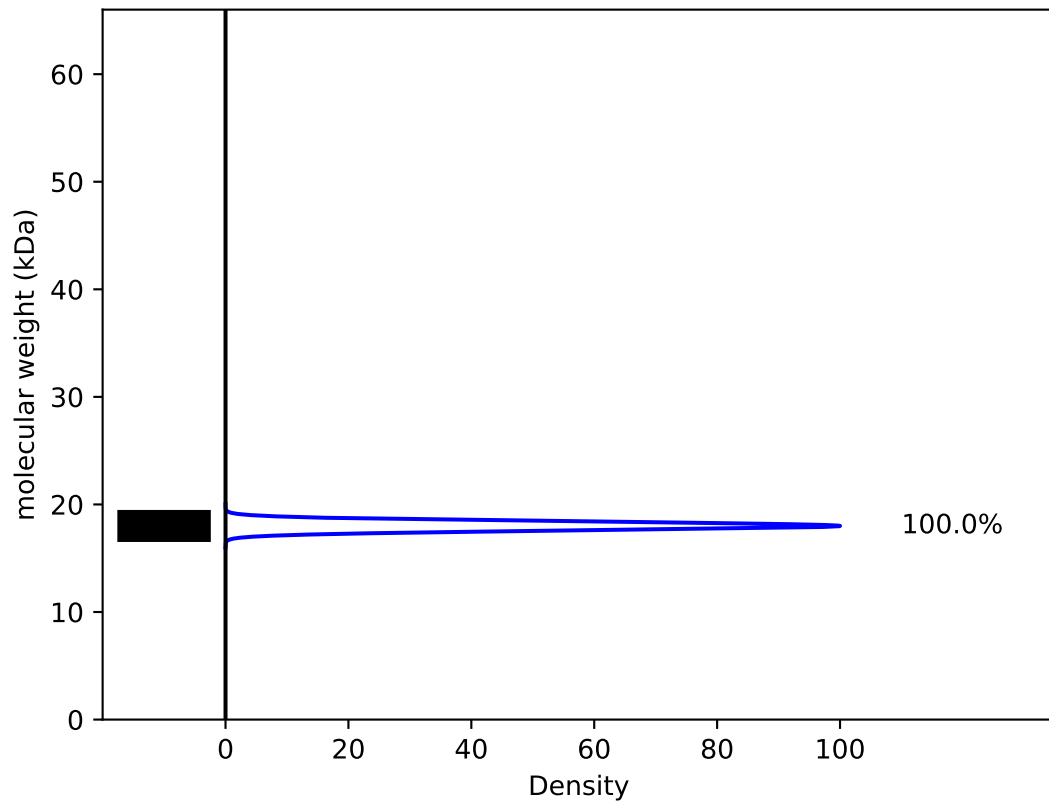

# P82673

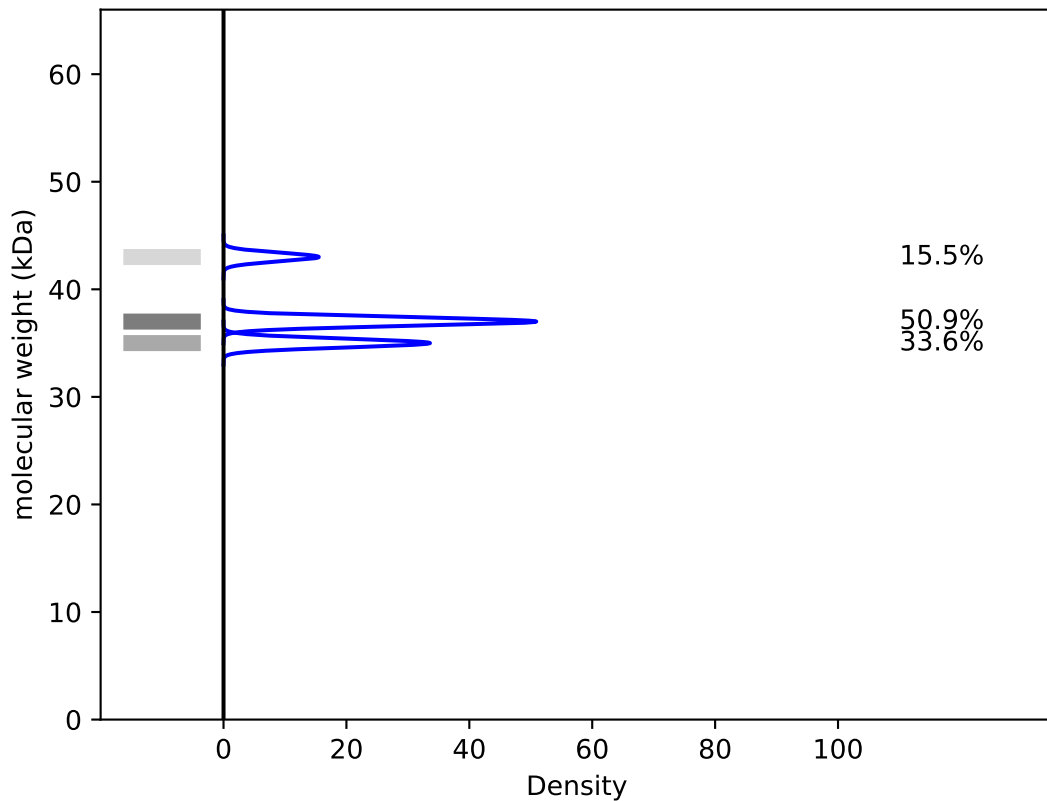

P82930



P82933



P82979



# P83731

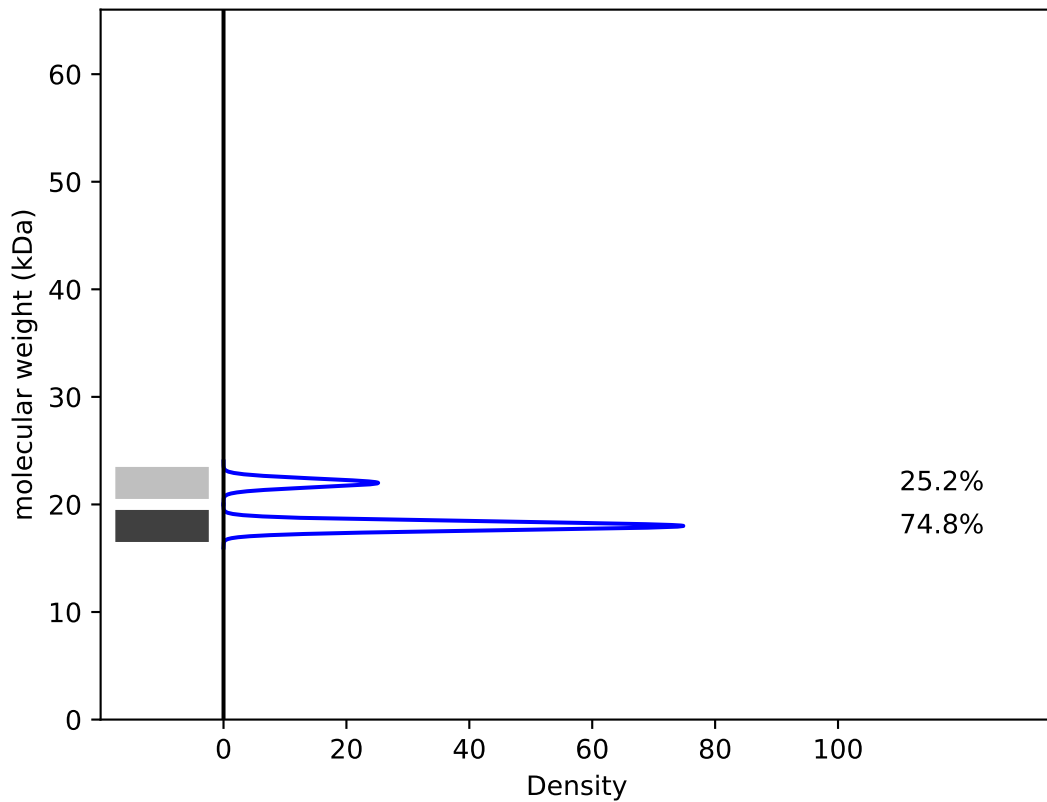

# P84085



# P84095

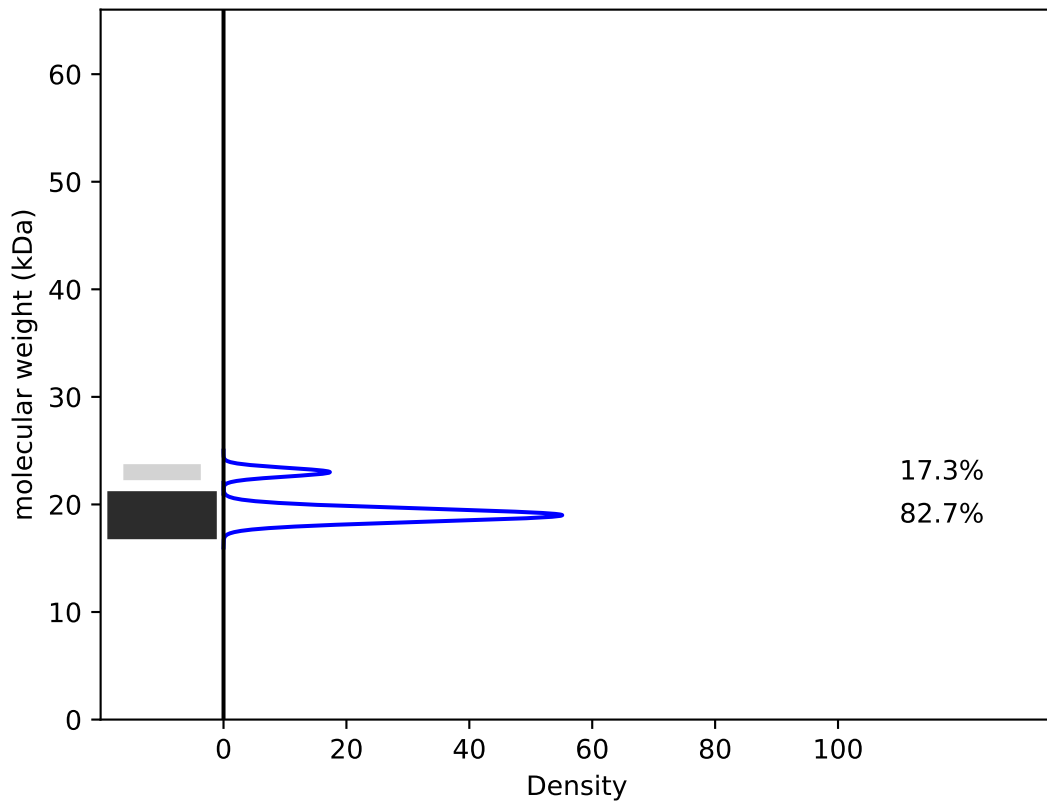



P84098



P84103



Q00325

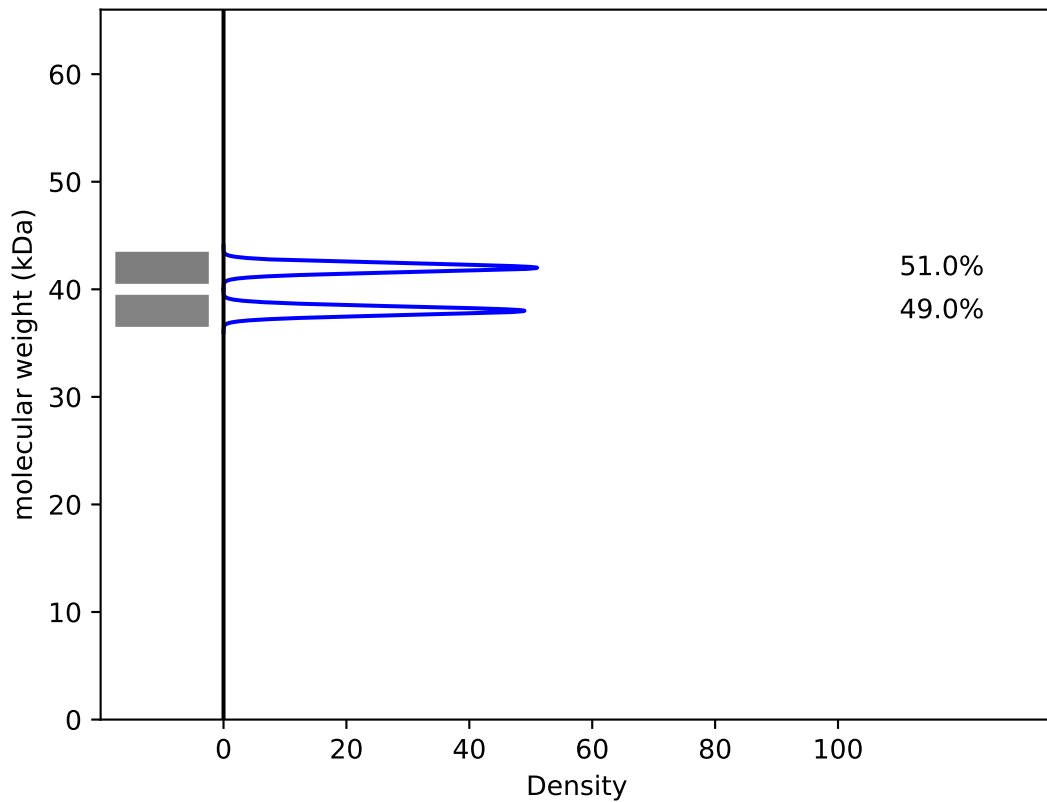

Q00577

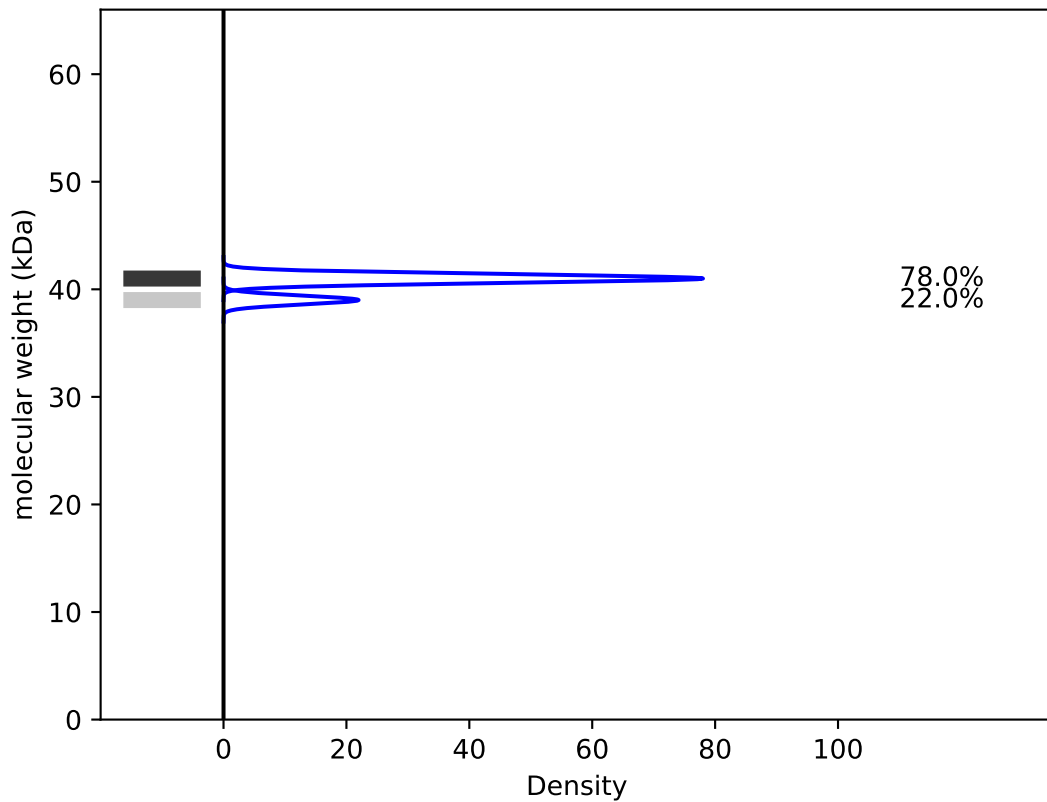

Q00688



Q00765



Q00796

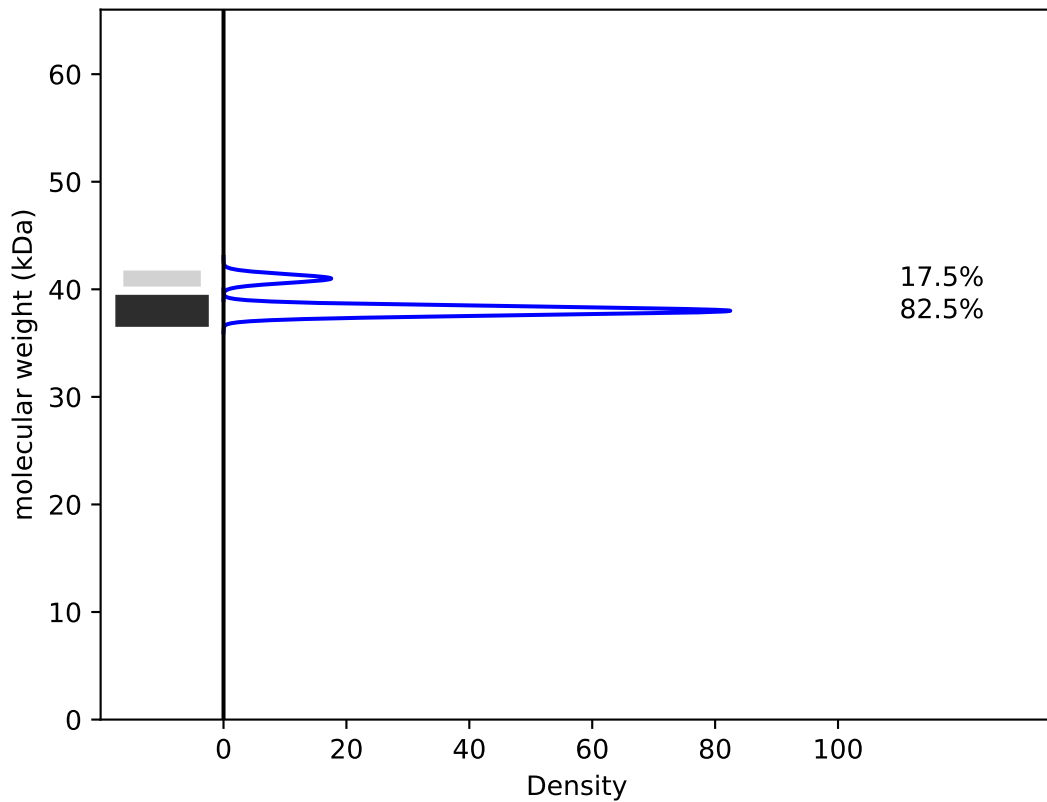

Q01085





# Q01105

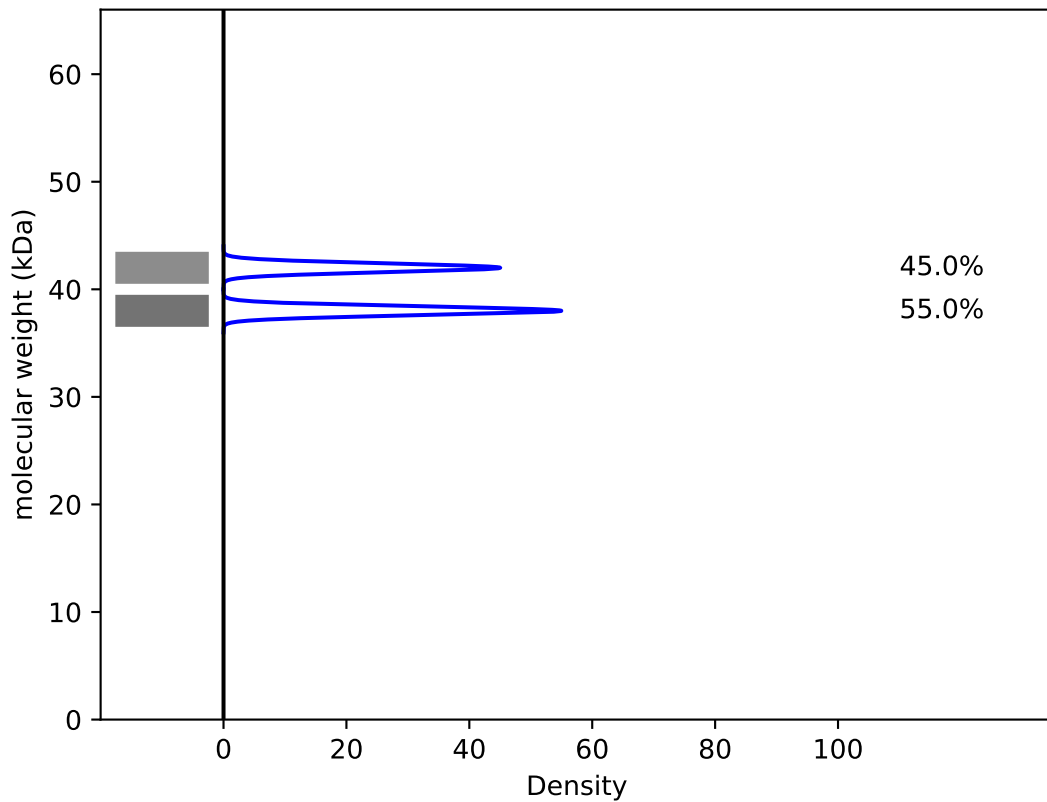

# PODME0

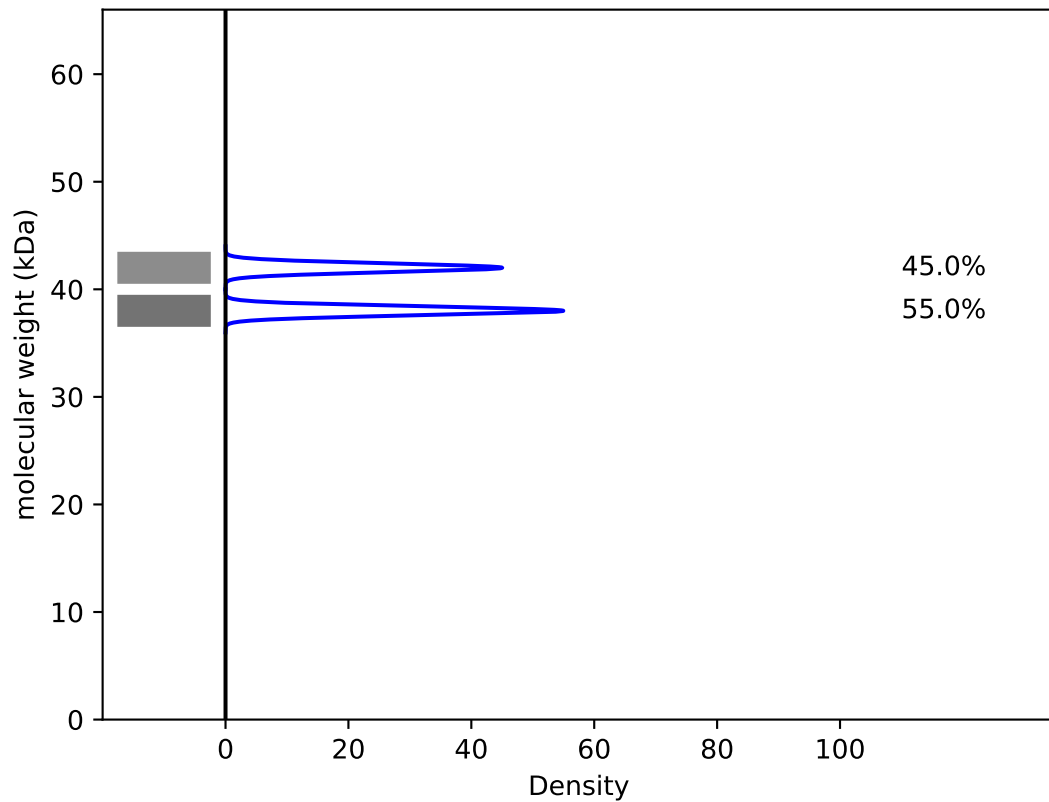

Q01130



# Q9BRL6



# Q01518



P40123



# Q01581

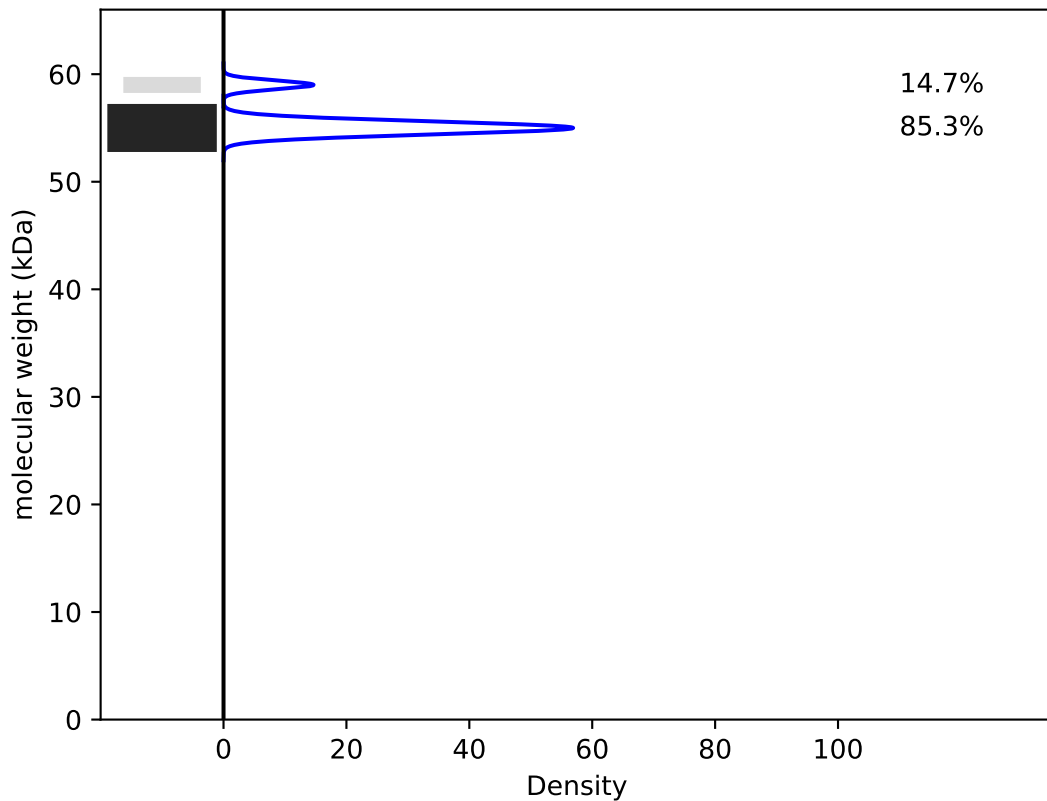

# P54868

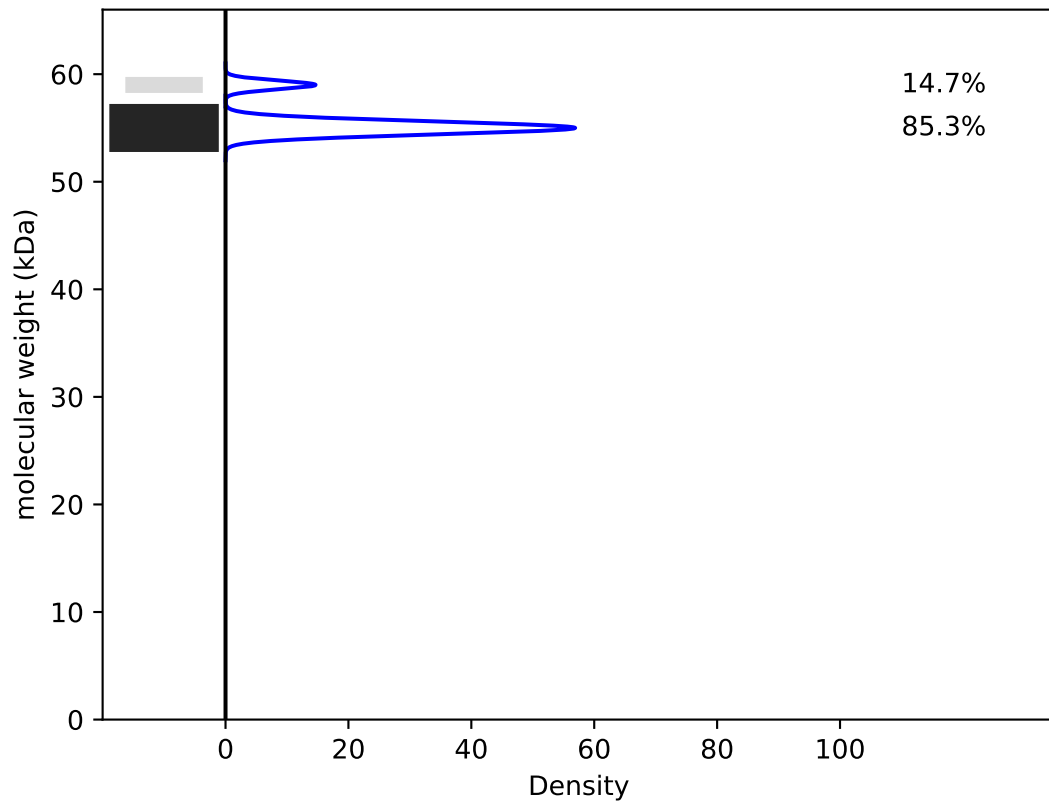



Q02127



Q02543

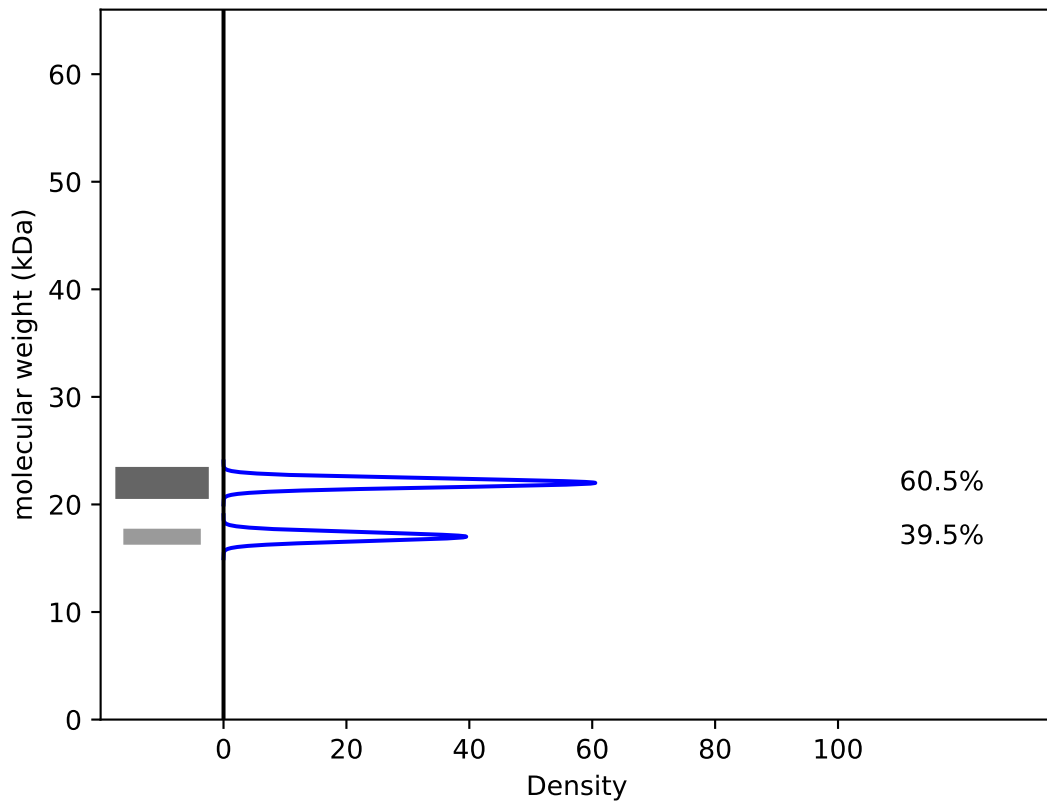

Q02750



Q02790



# Q02878

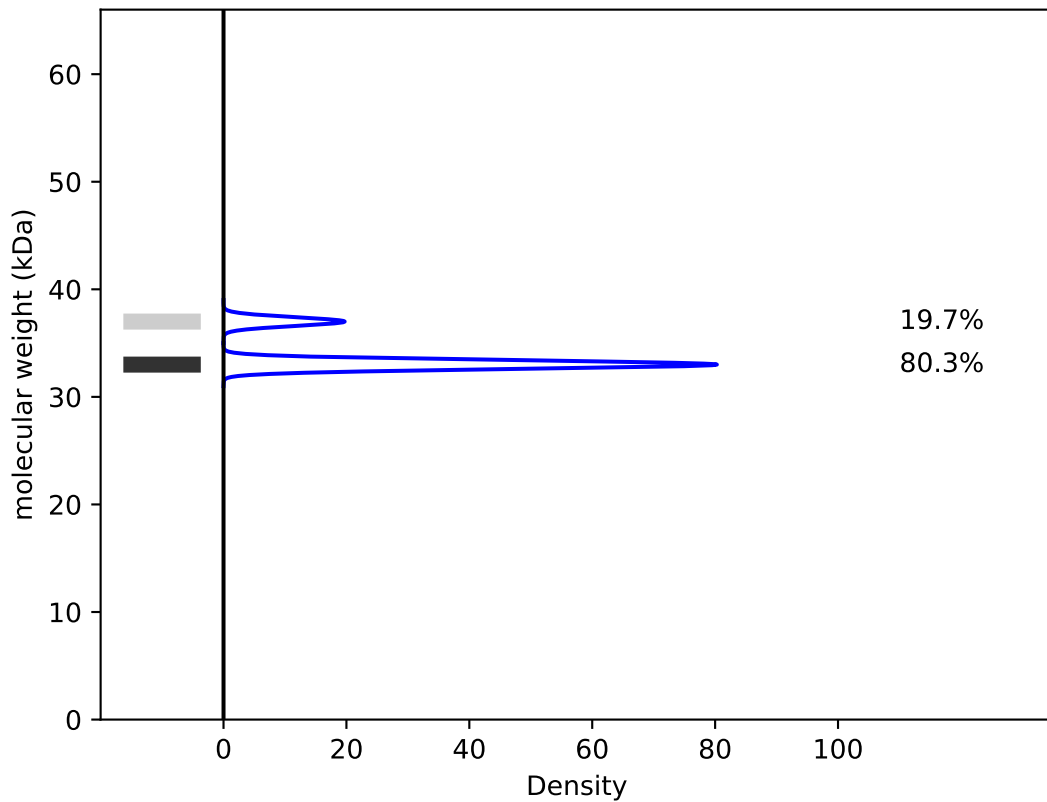

Q02978



Q03154



Q04917

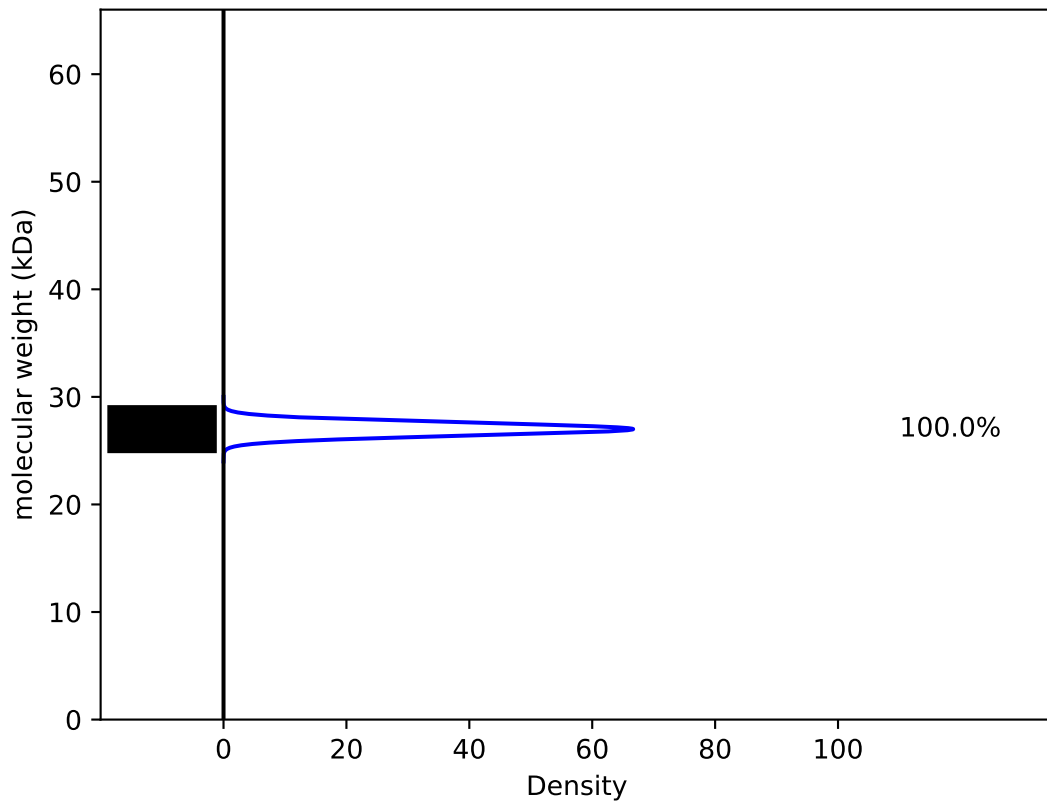



Q05048



Q05639



Q06203



# Q06323

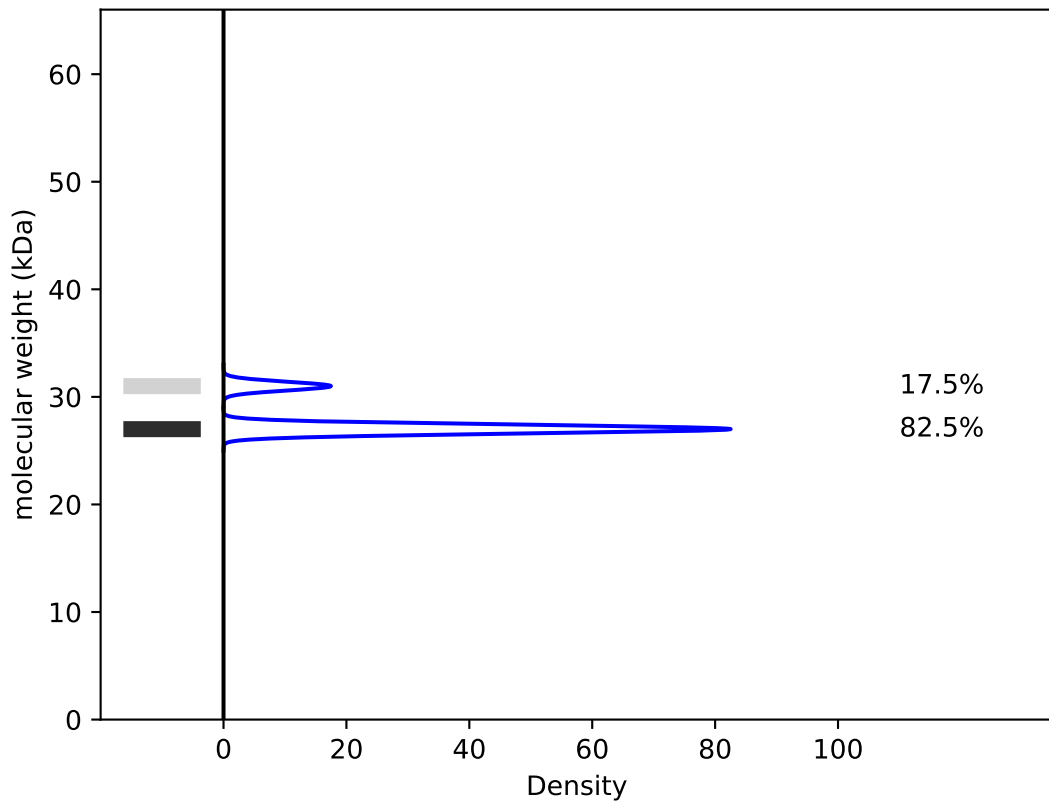

Q06830



# Q07020

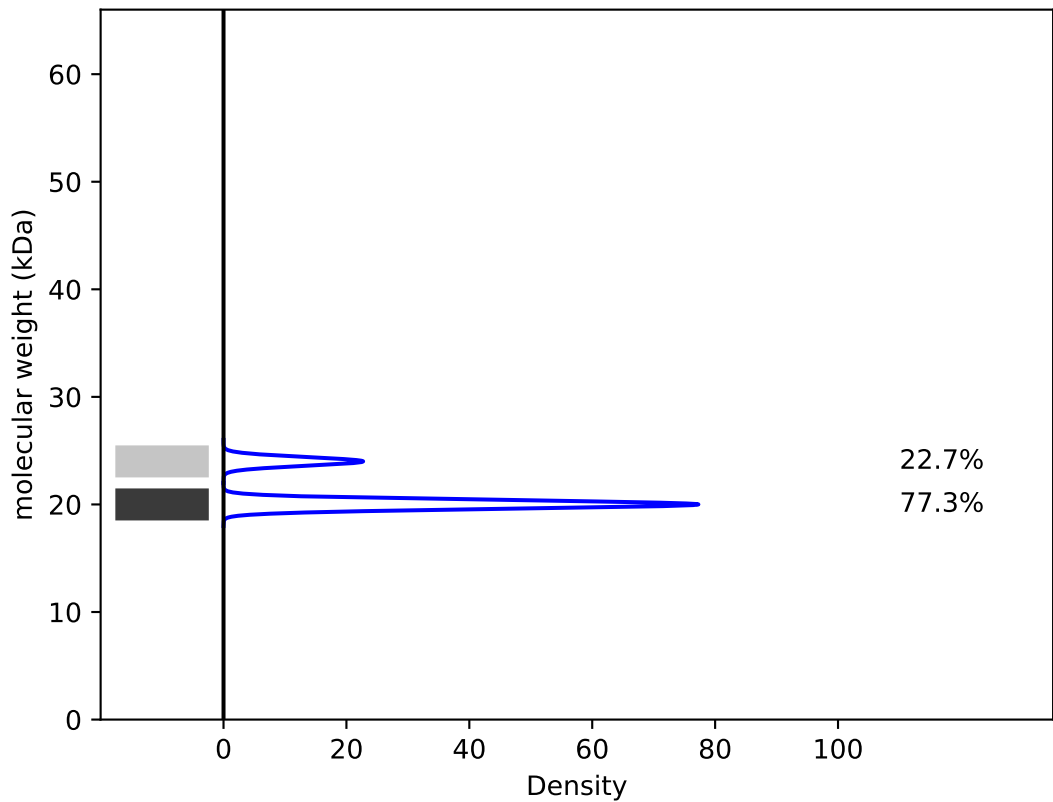

Q07021



# Q07666

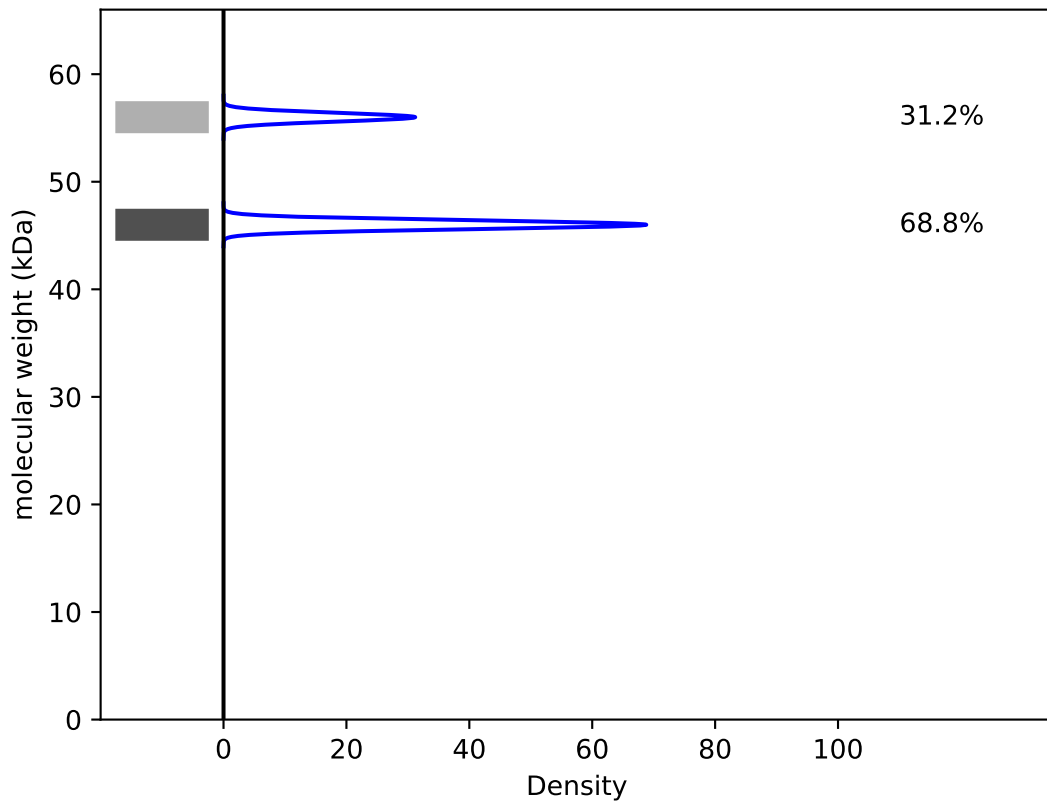



Q07812

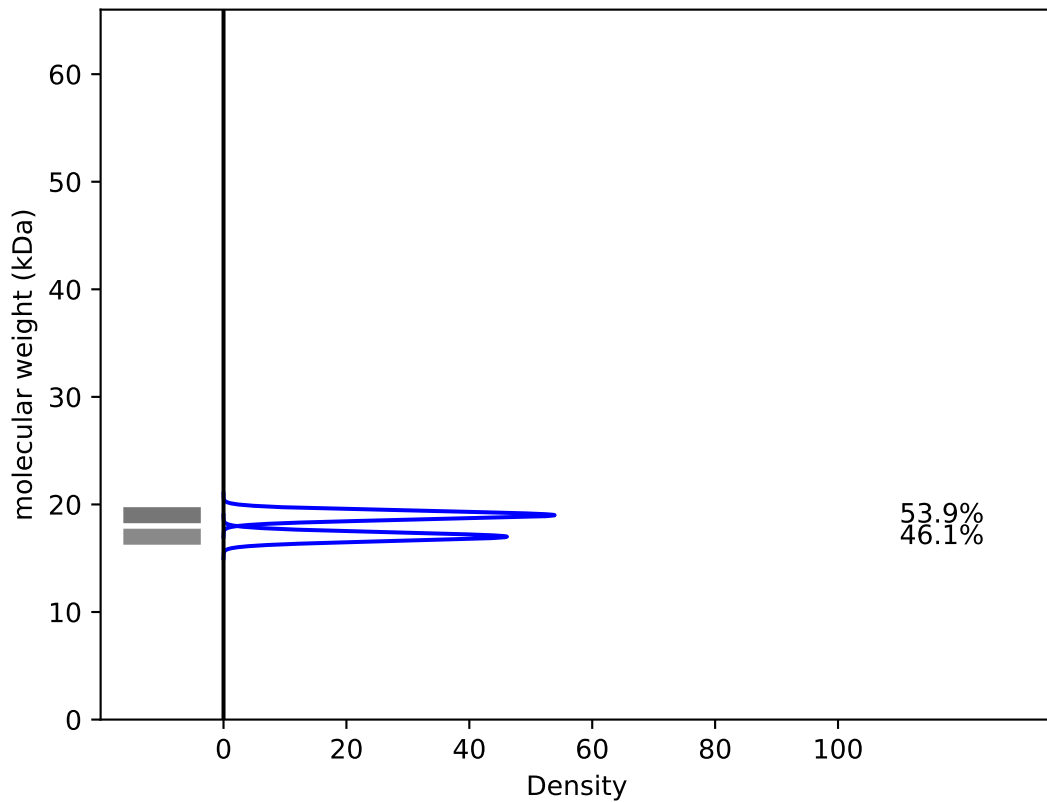

Q07955



Q08209



# P16298



P48454



Q08257

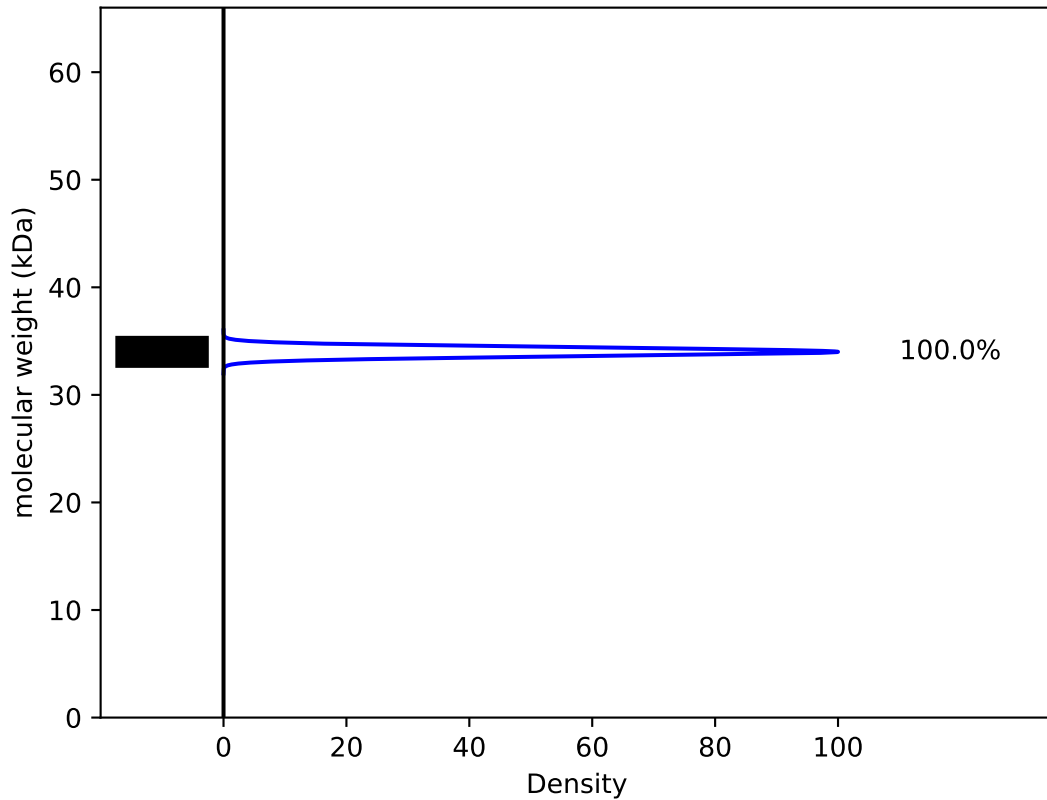

# Q08752

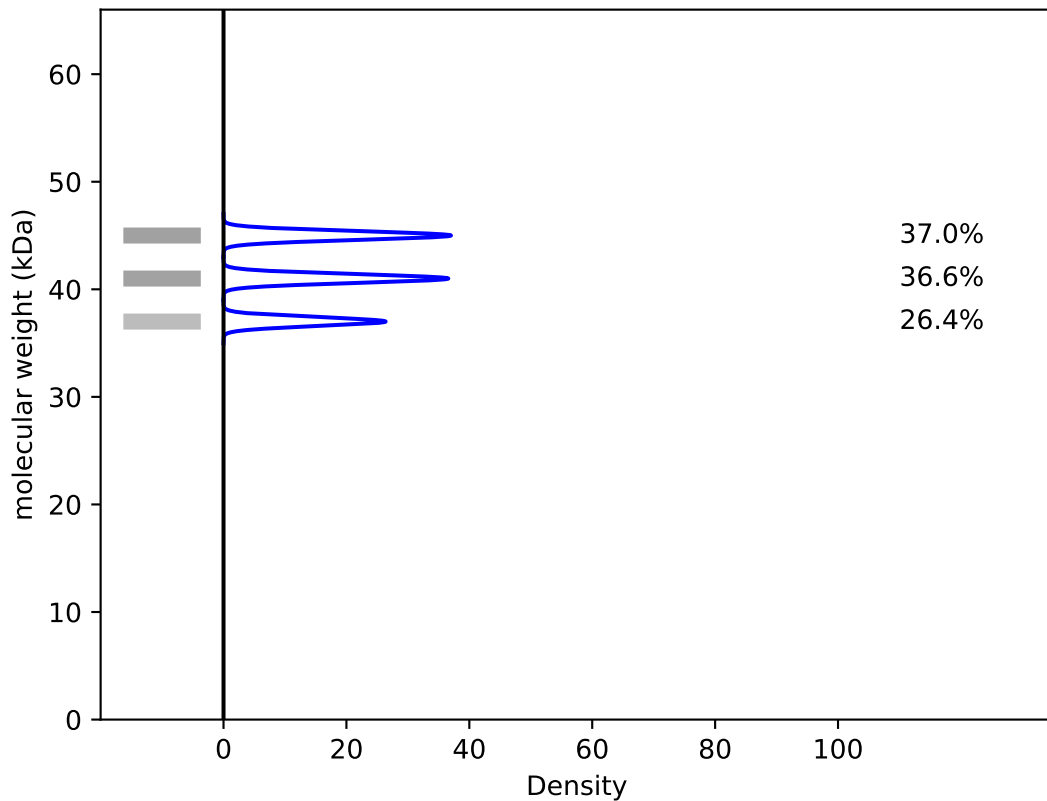

# Q0VDF9

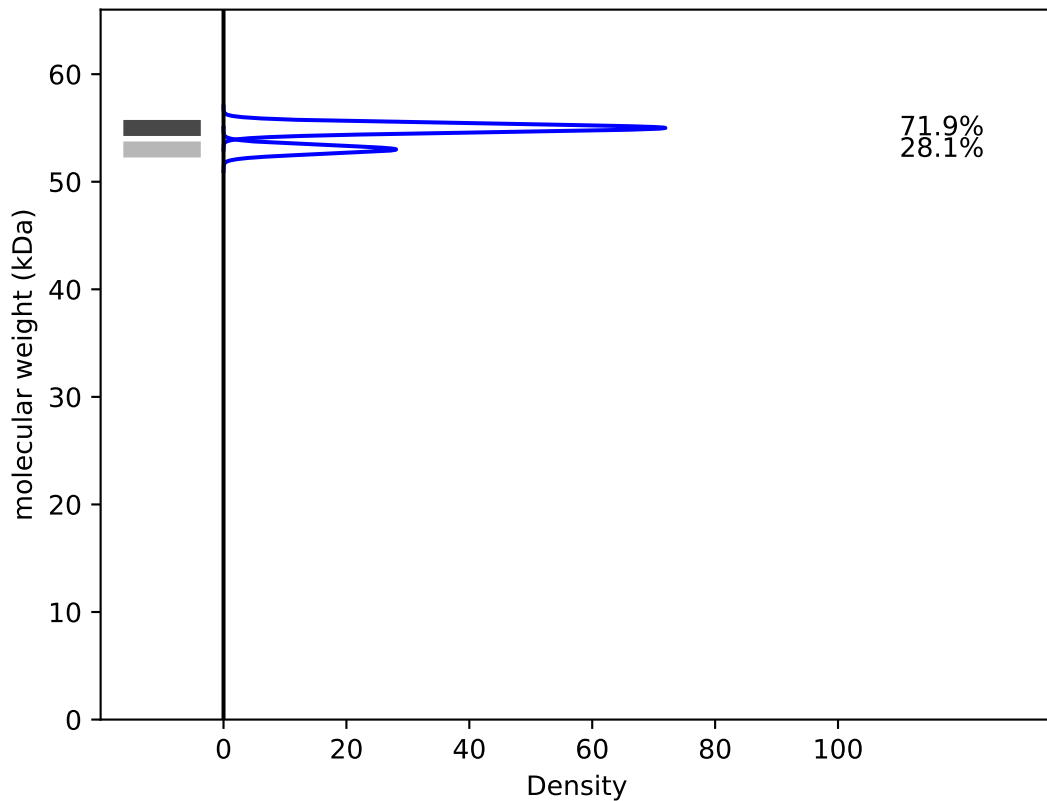



# Q10713



# Q12792

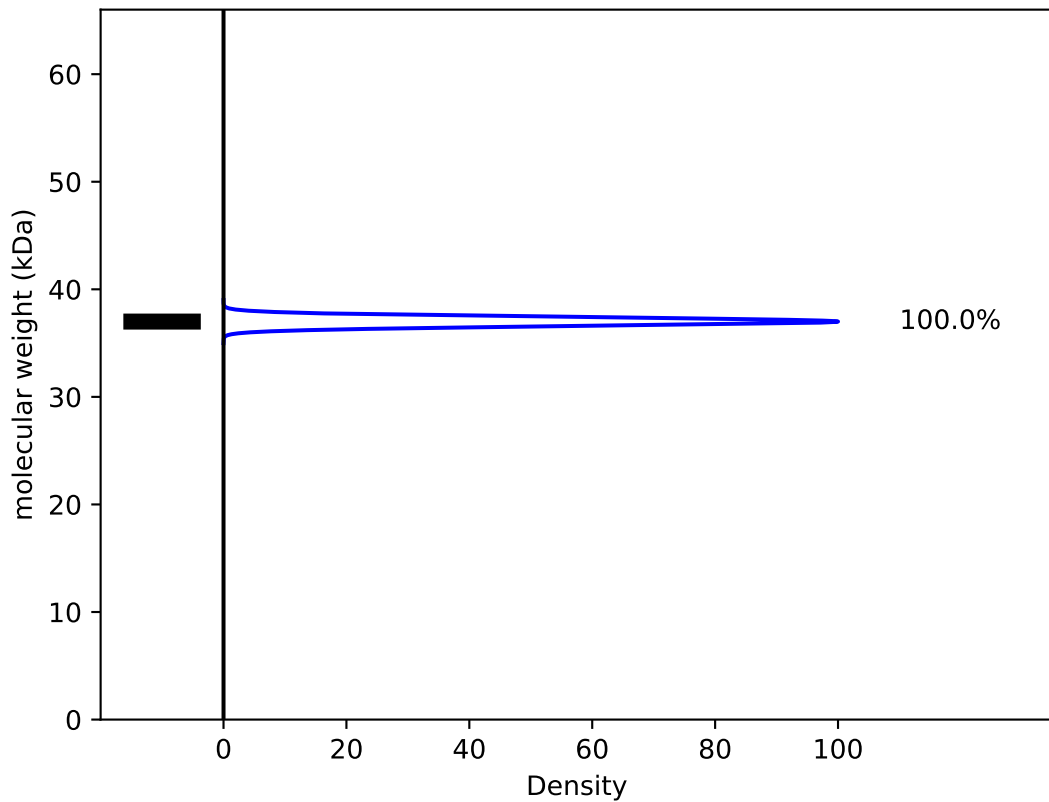

# Q12824



# Q12846



# Q12874



# Q12904



# Q12905



# Q12972

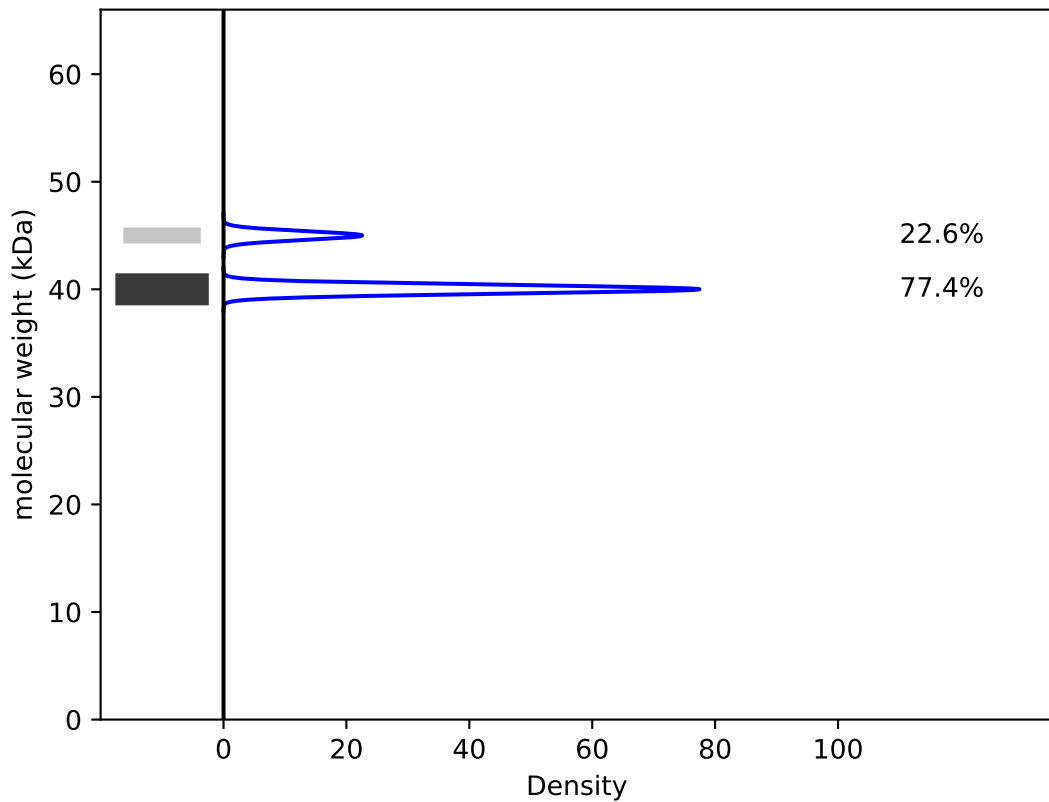



# Q13084



# Q13098



# Q13126



# Q13148

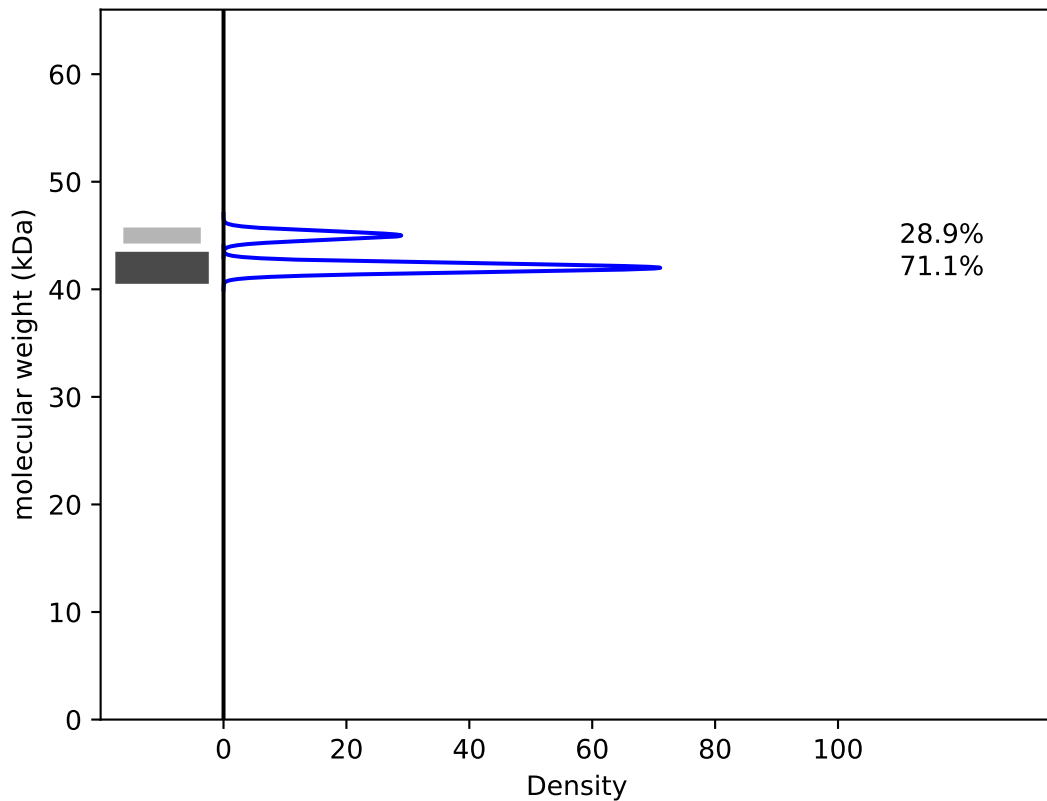

# Q13151

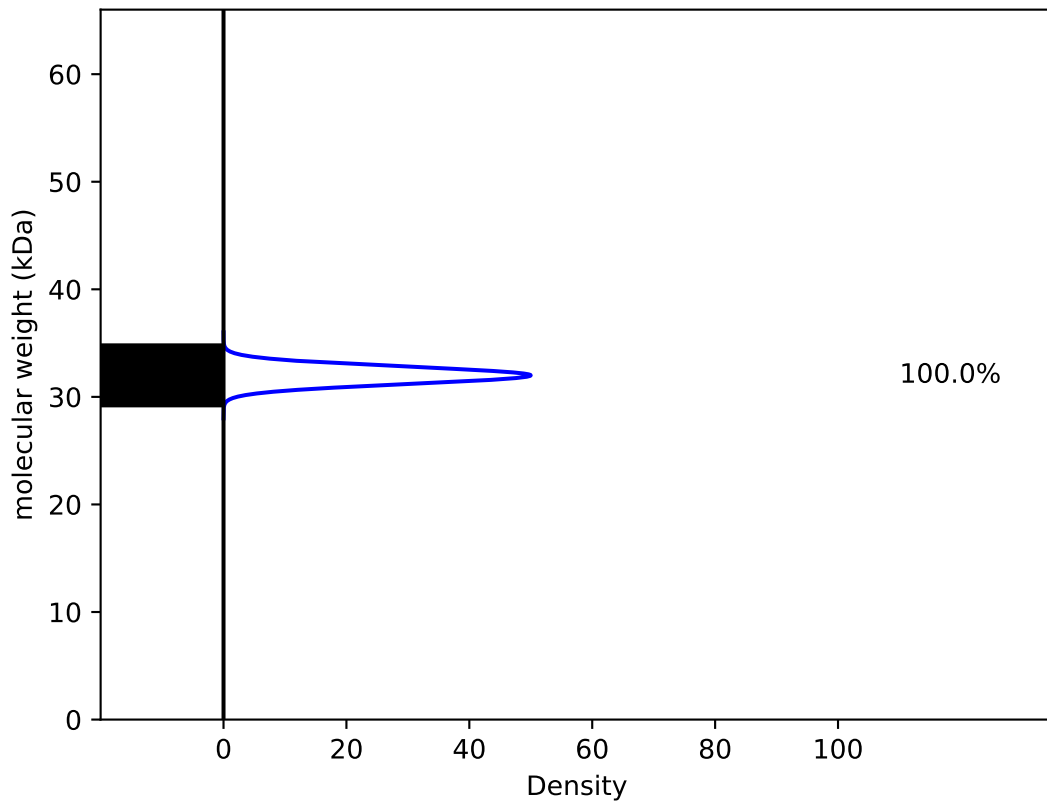

# Q13155

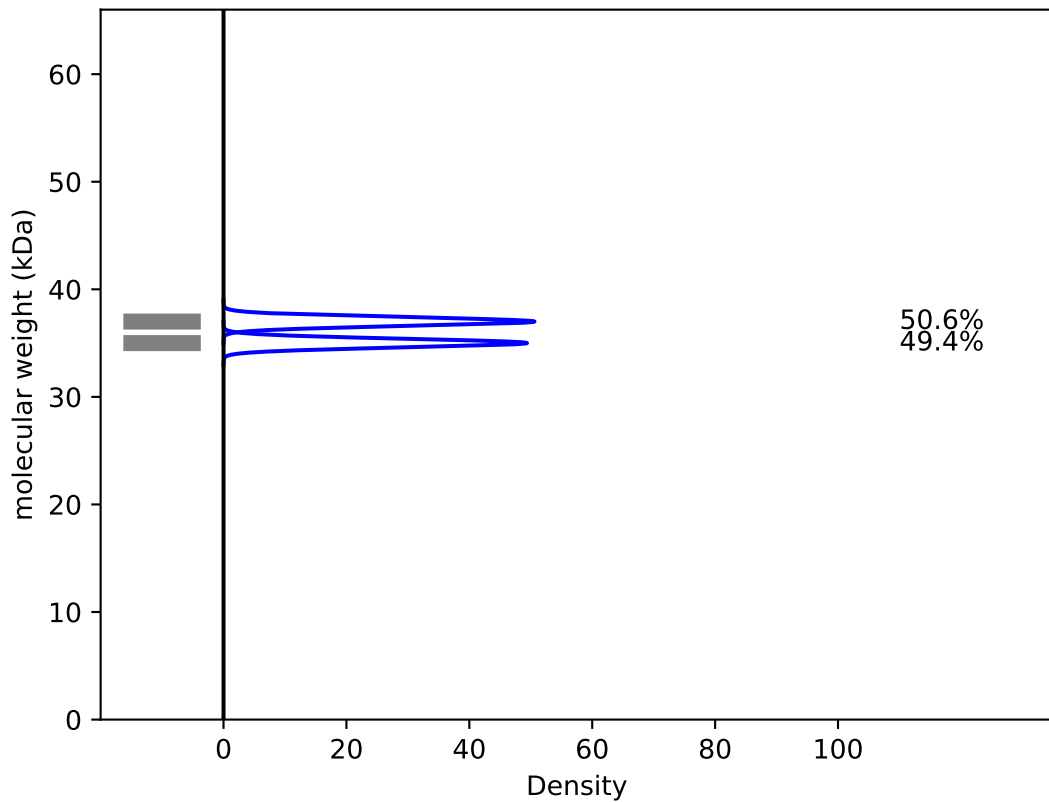

# Q13162



# Q13177





# Q13185

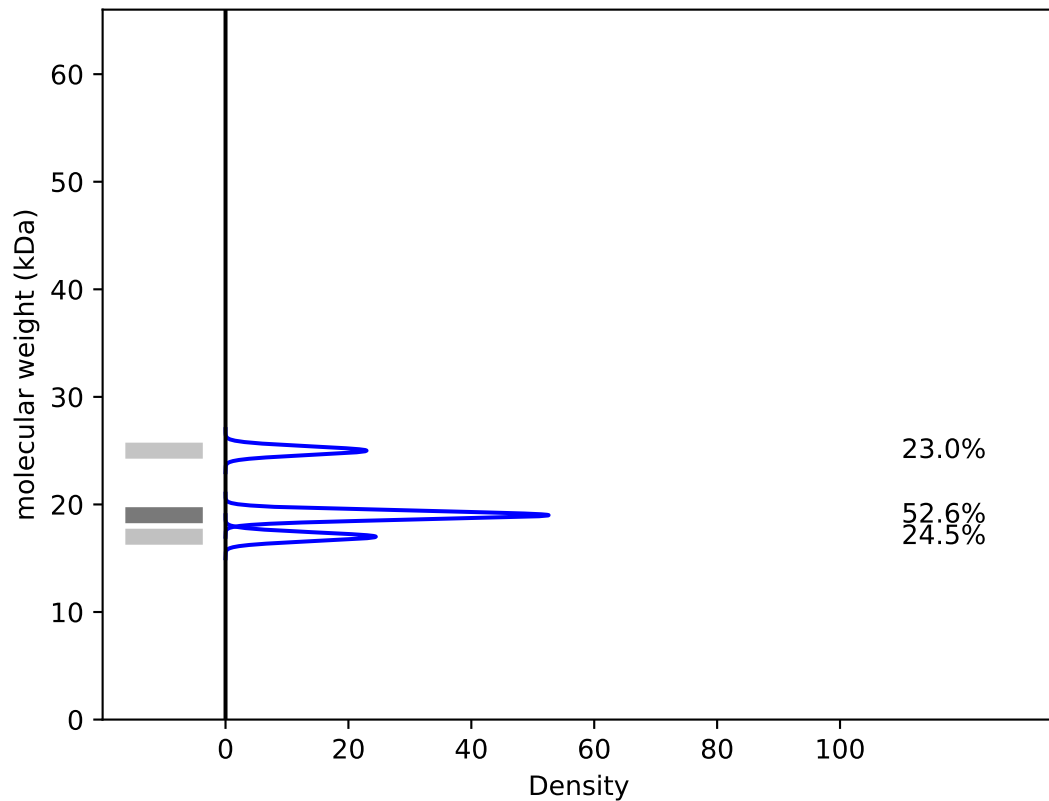

# P83916



# Q13242

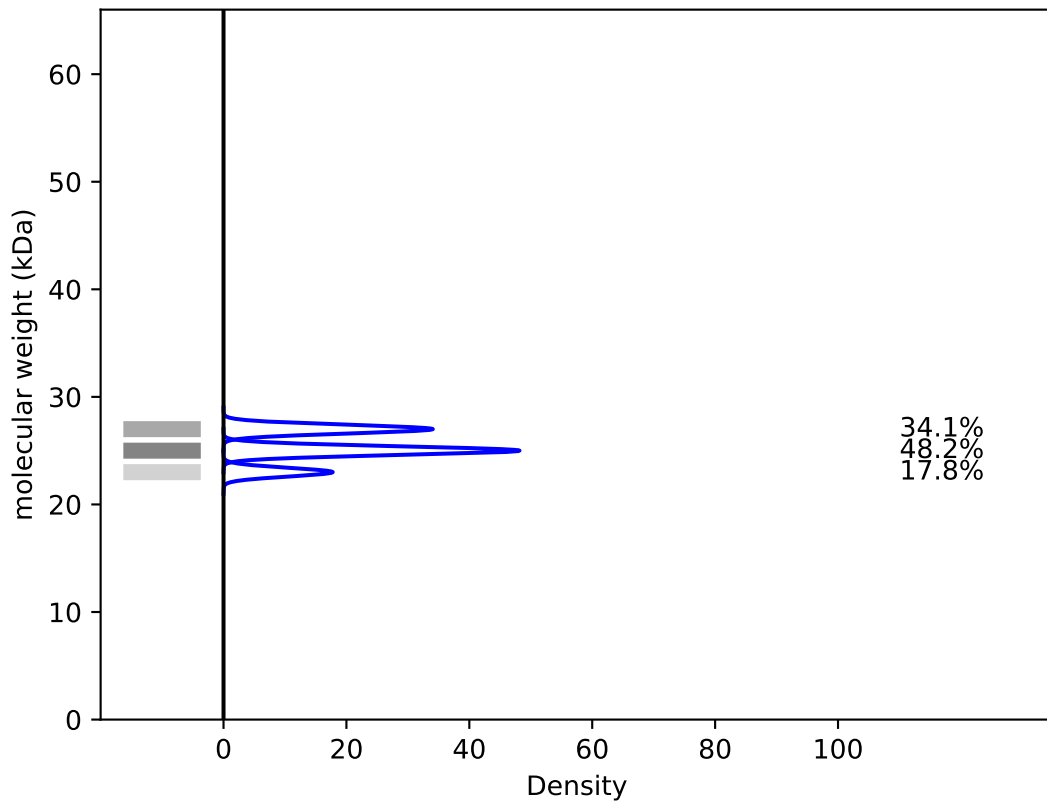

# Q13247

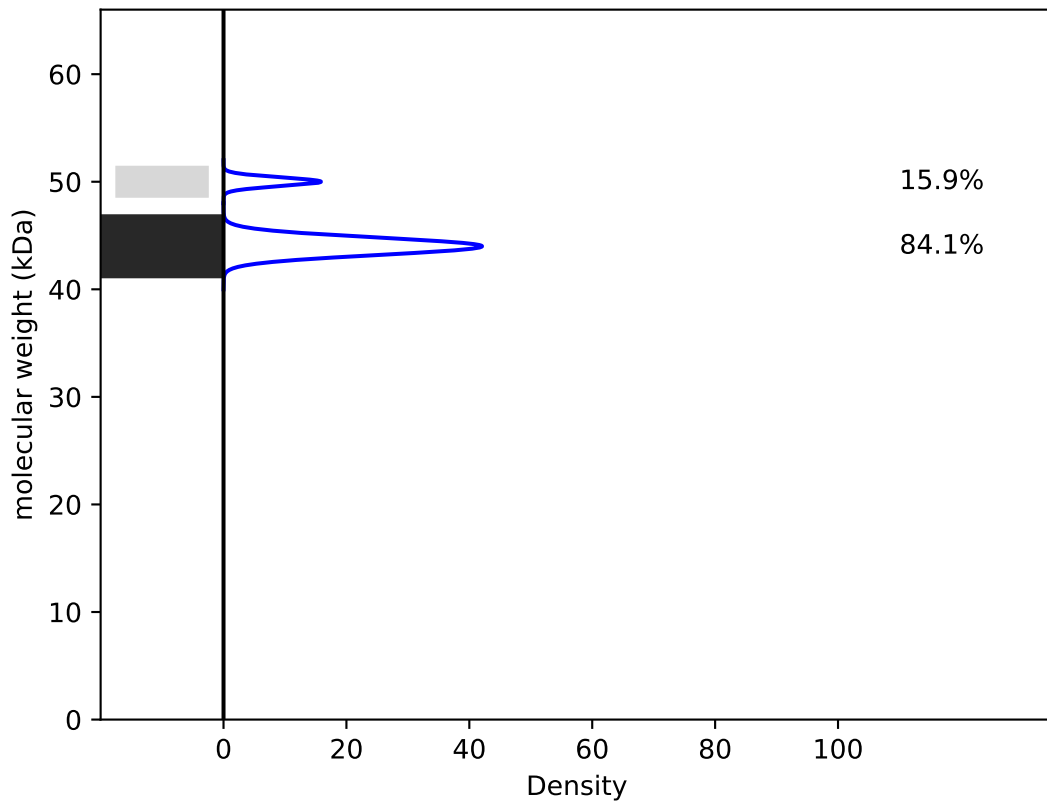

# Q13283

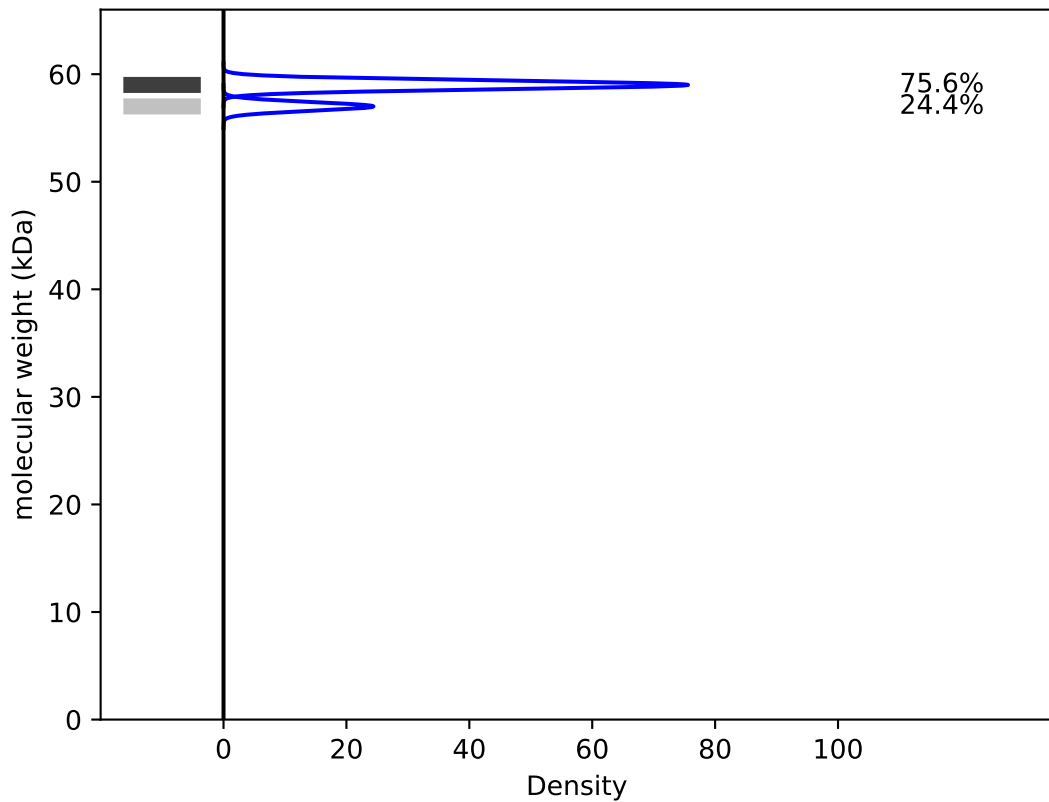

Q13347



# Q13363



# P56545





# Q13442



# Q13509

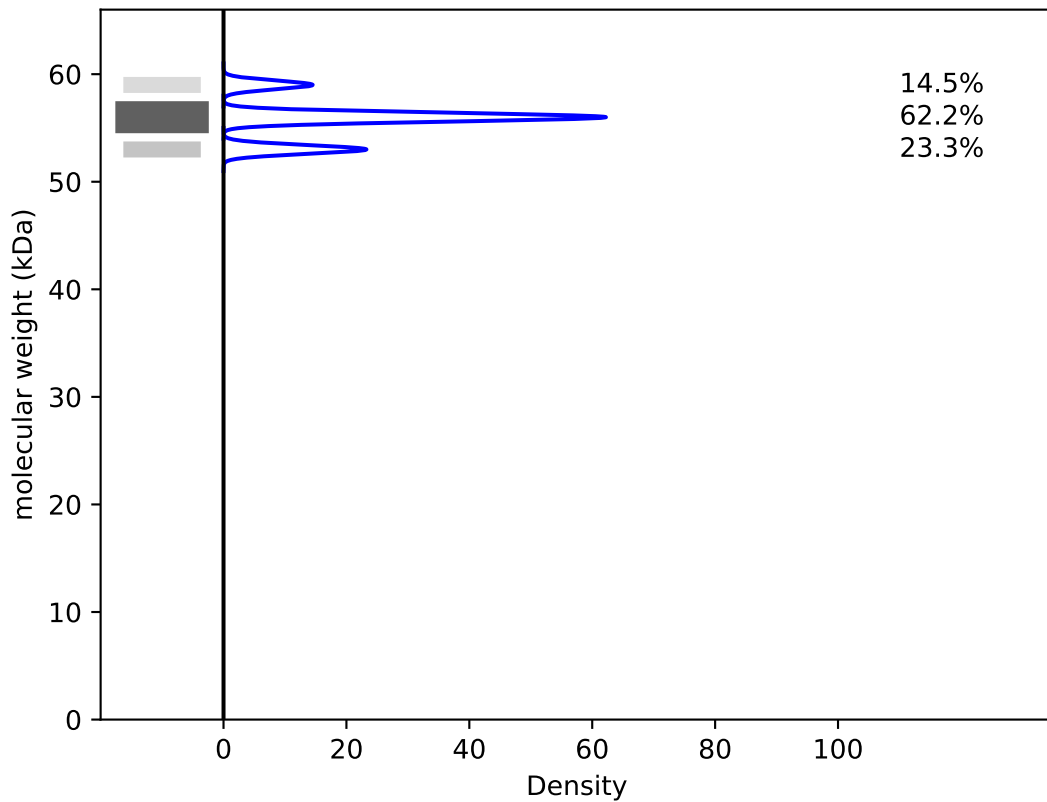

# Q13547



# Q13564



# Q13572

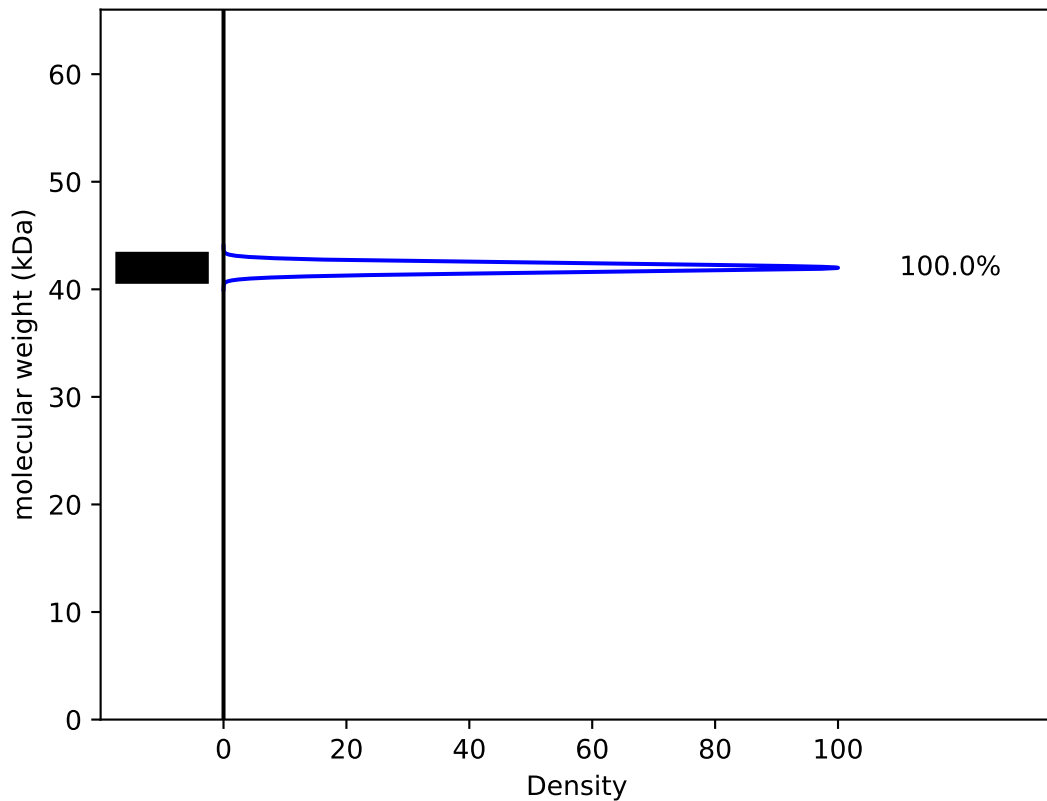

# Q13595

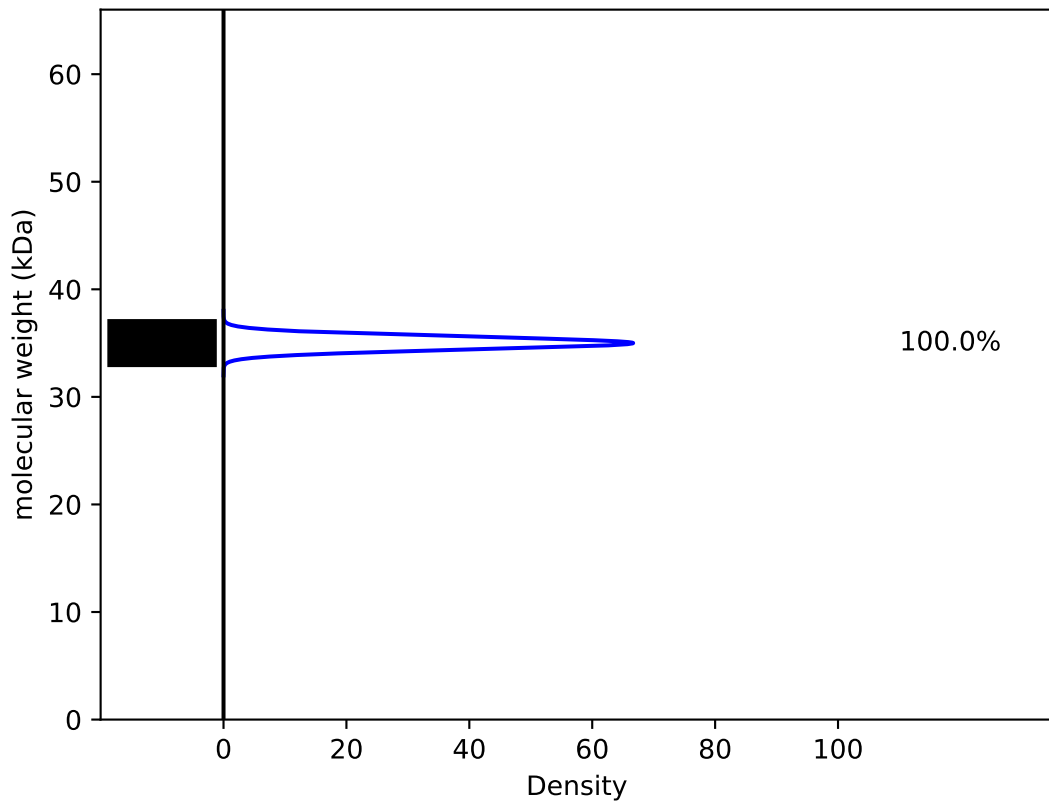

# Q13630

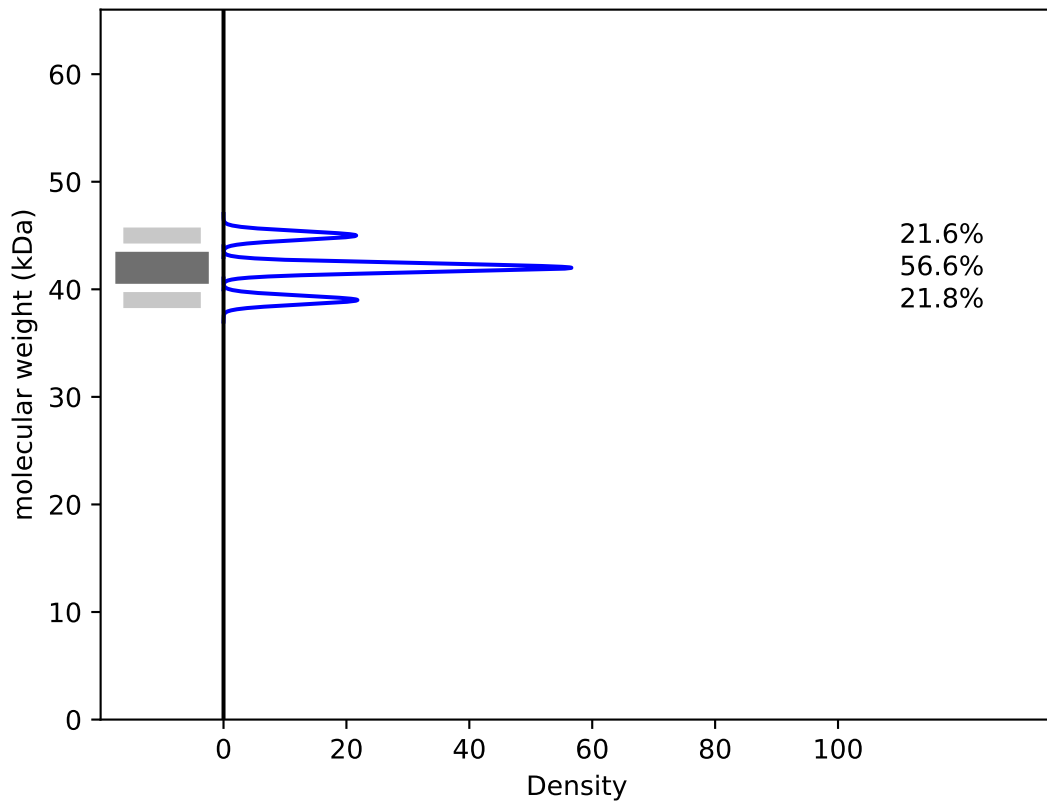

# Q13636

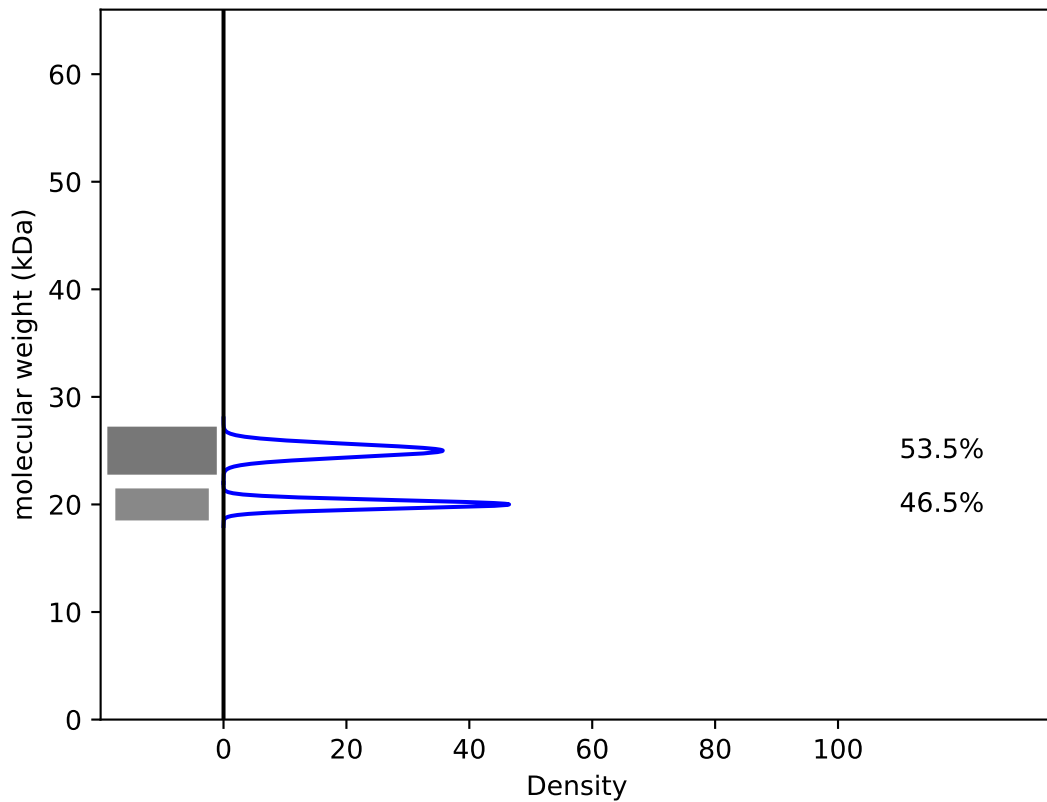



# Q9UL26

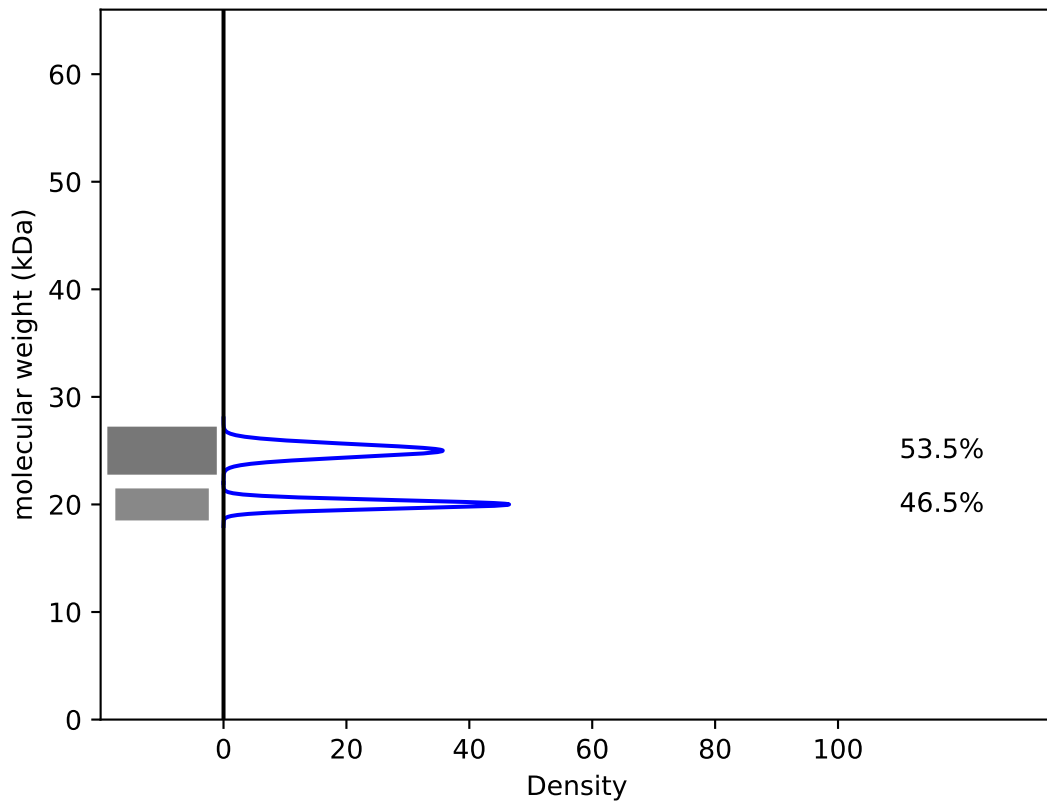

# Q13637

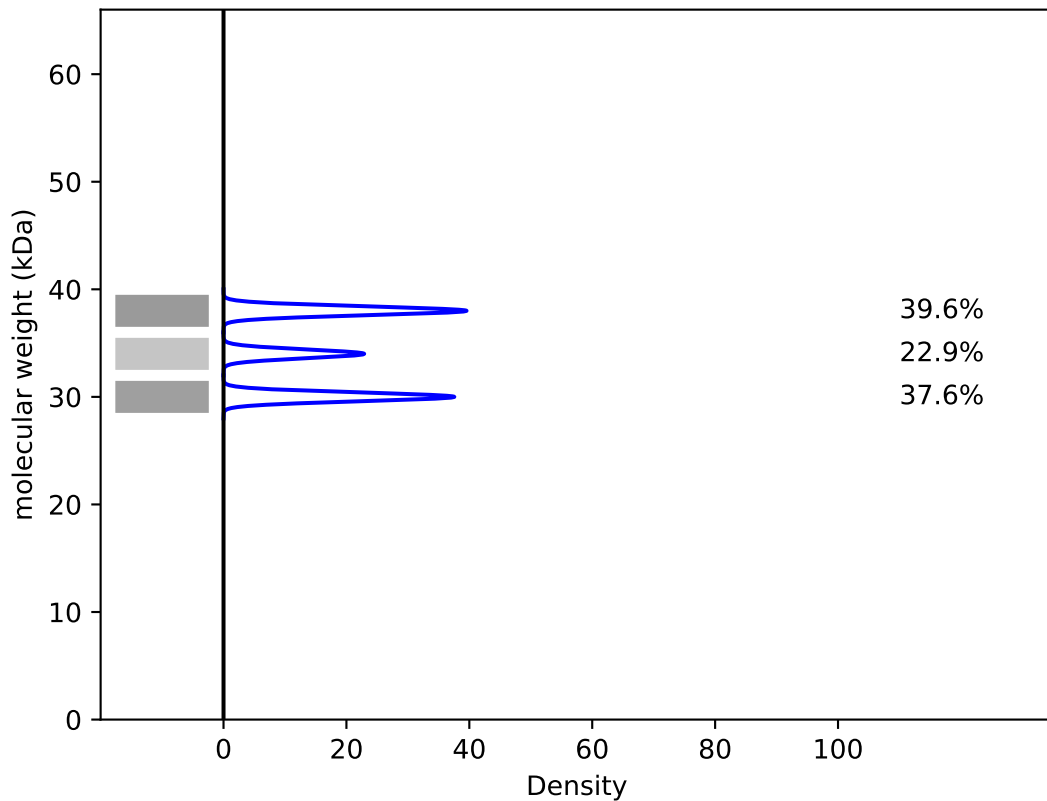

Q13838



# Q13867



# Q13868

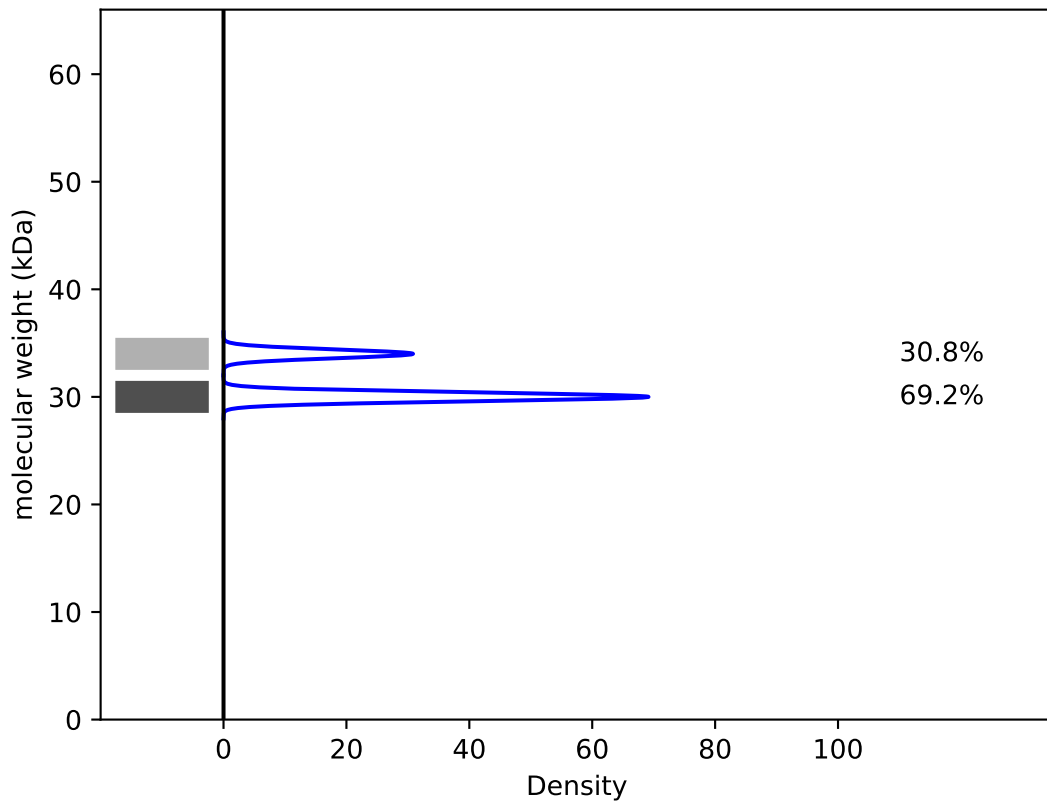

# Q13885



# Q9BVA1



# Q13895





Q13907



# Q14011



# Q14103

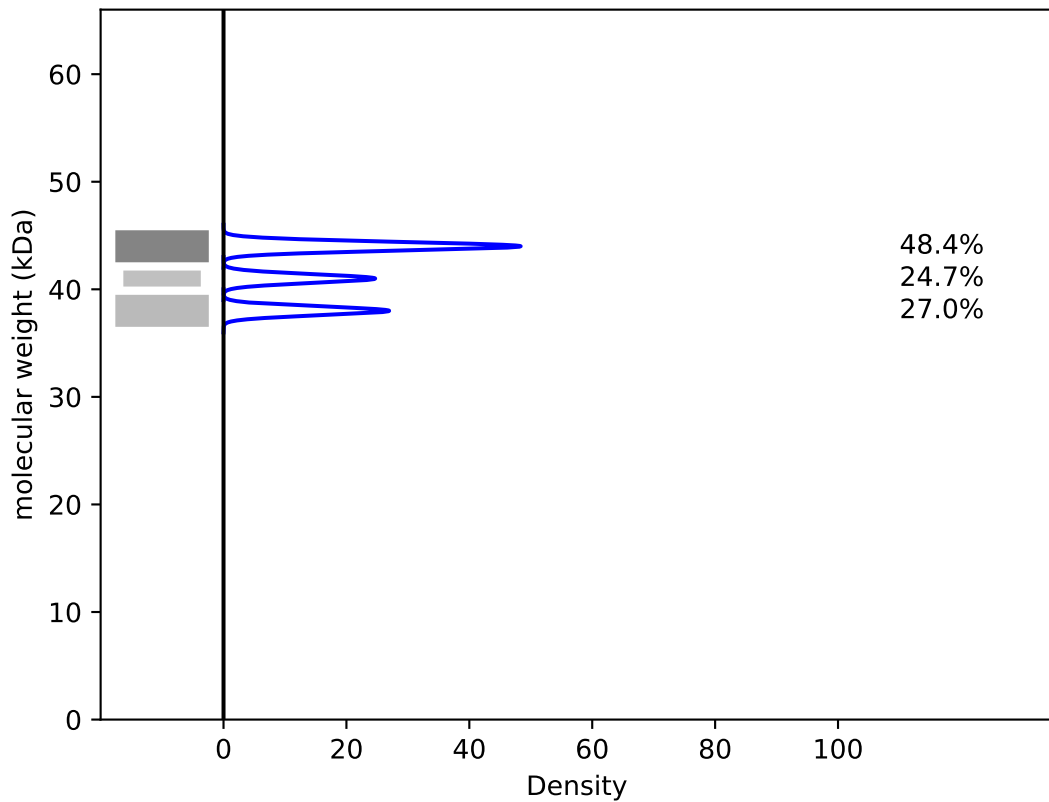

# Q14116

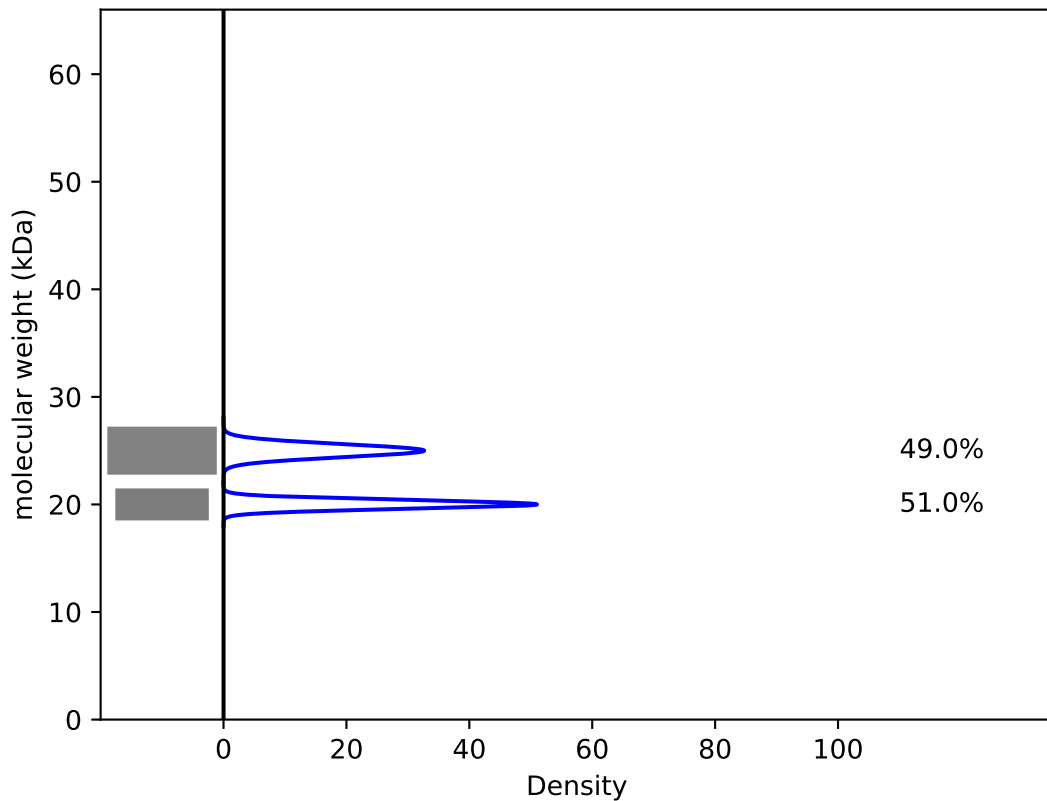

# Q14165

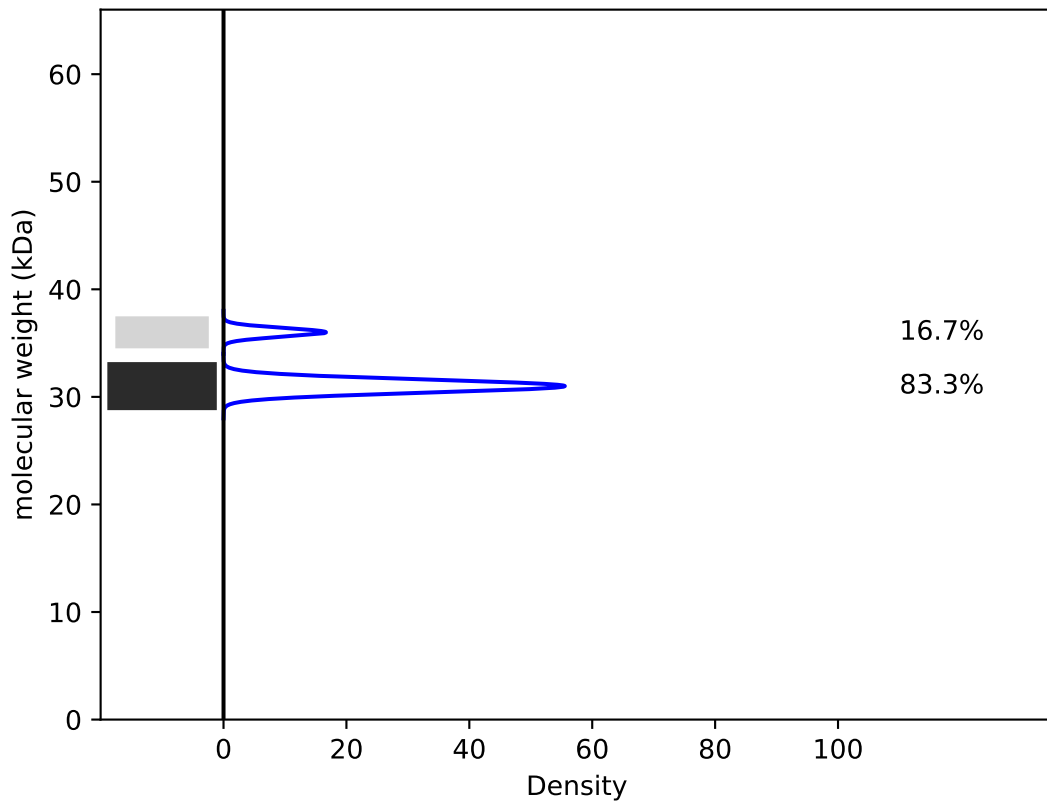

# Q14197



# Q14232



# Q14320





Q9Y247



# Q14331



# Q14344



# Q14376

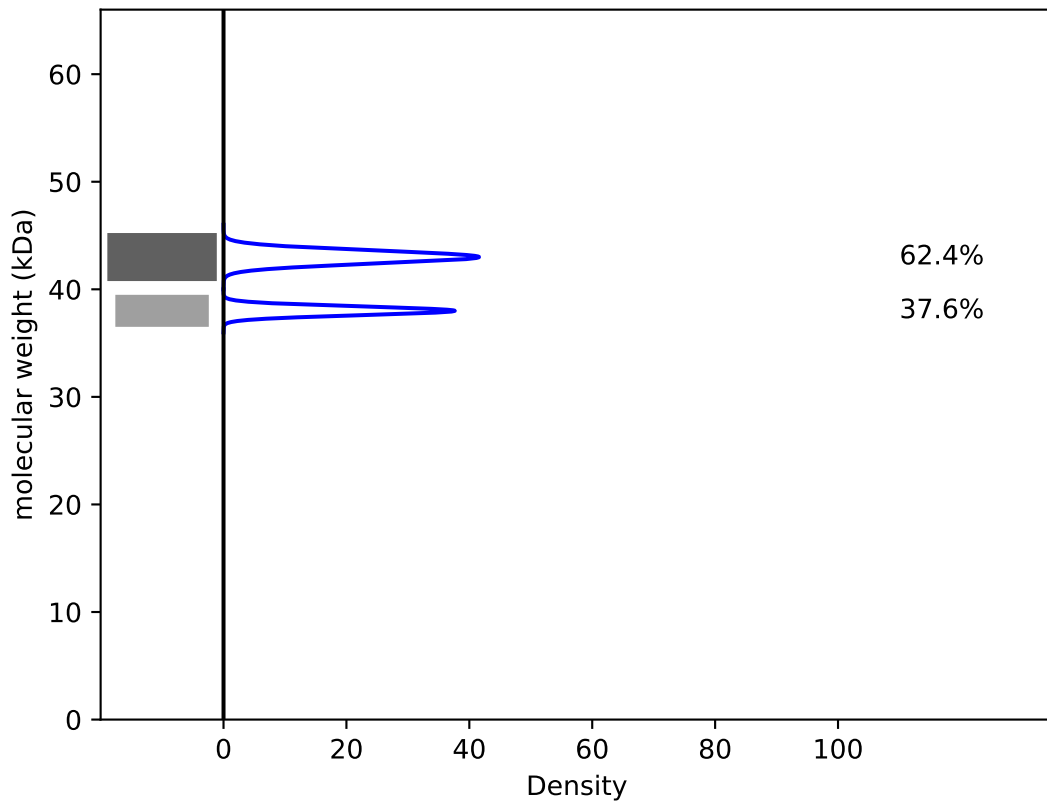

# Q14498



# Q14558

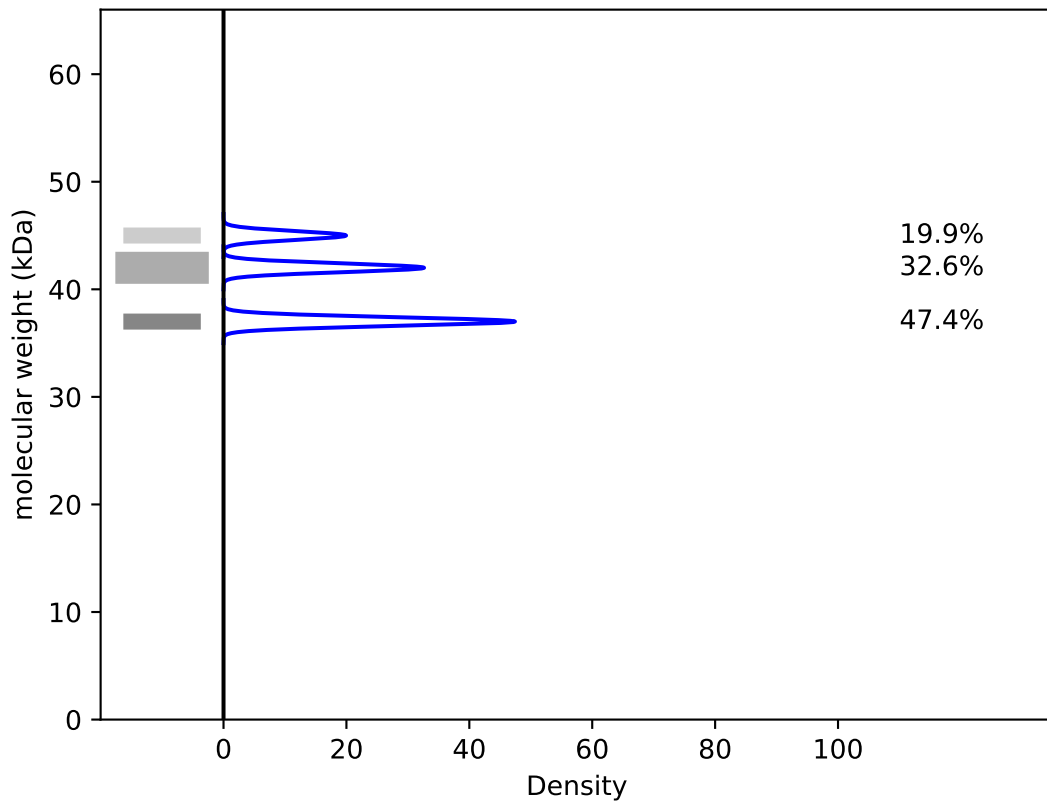

# Q14696



Q14847





# Q14914



# Q14964

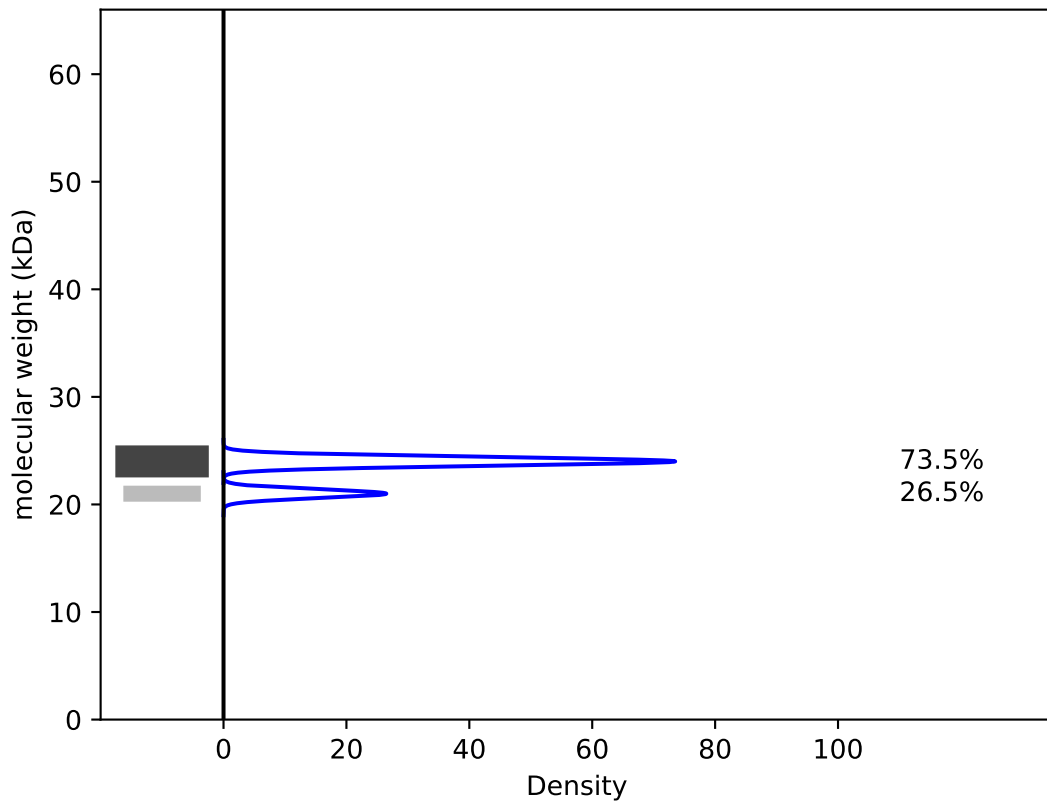

# Q15005

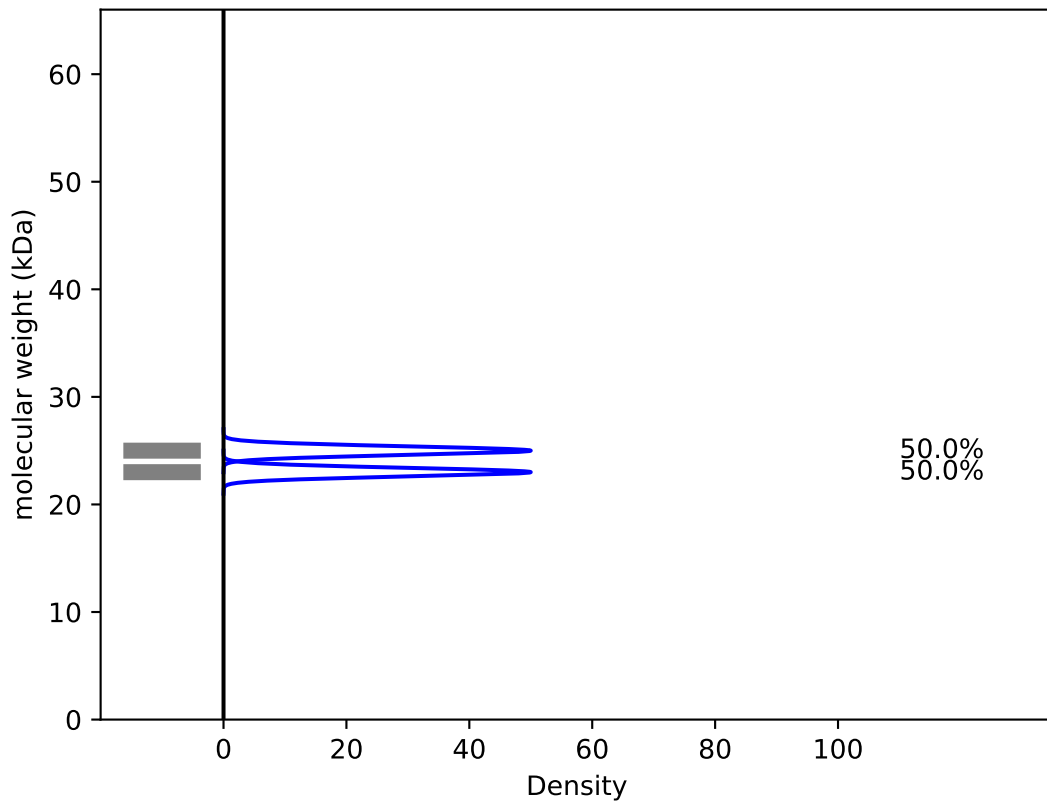

# Q15006



# Q15008



# Q15019



# Q15024

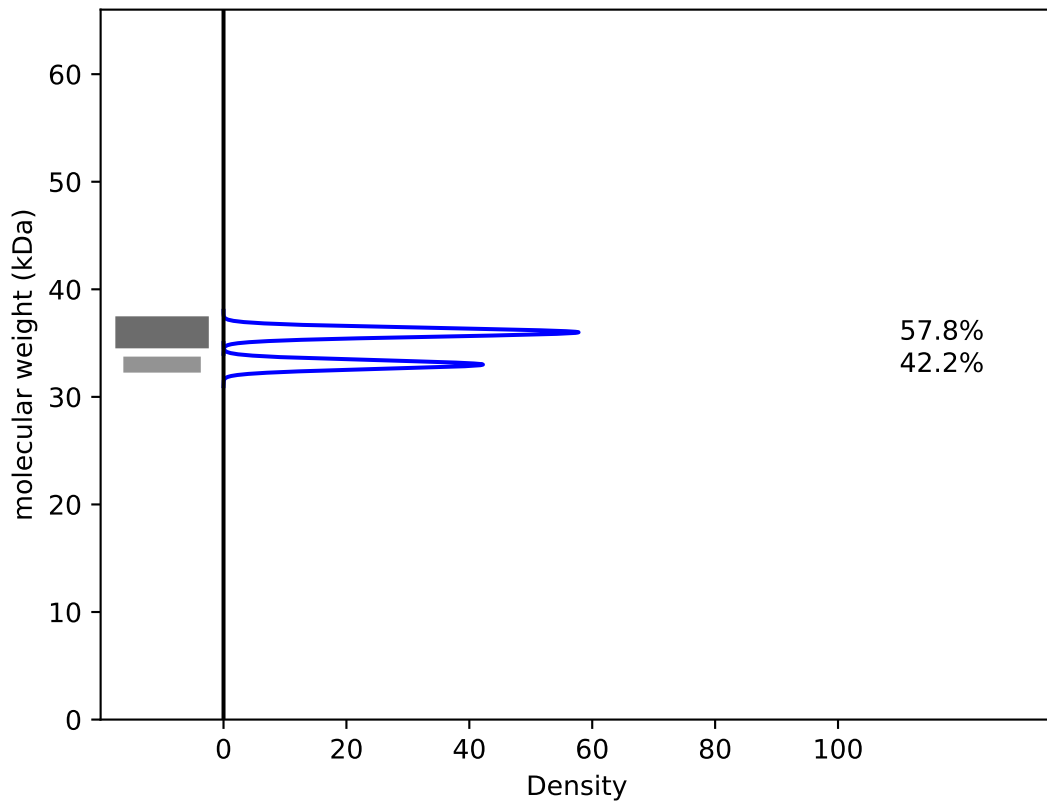

# Q15056





# Q15070



# Q15084

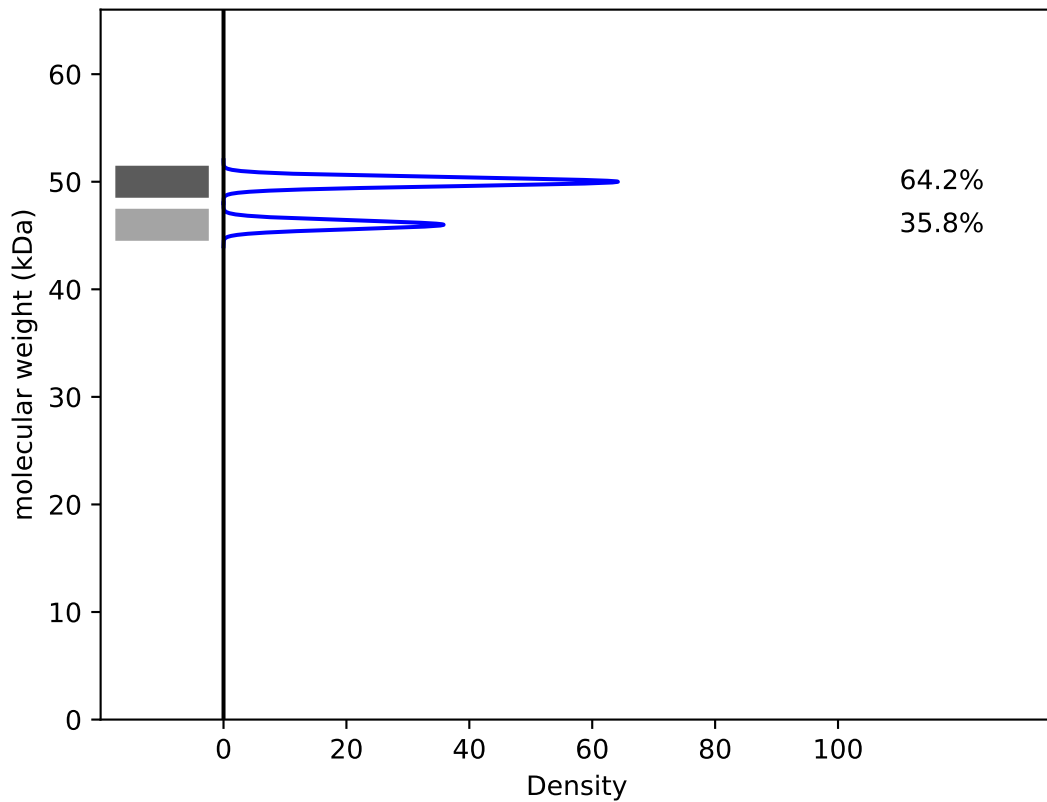

# Q15102



# Q15125



# Q15126

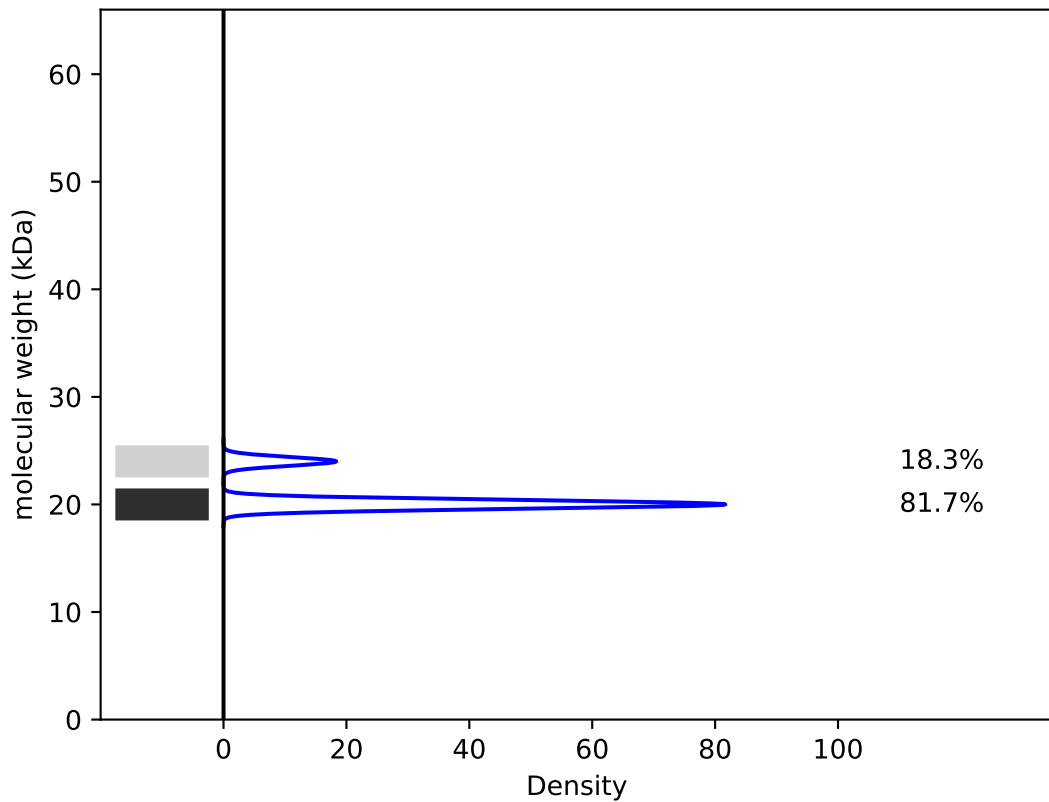

# Q15165

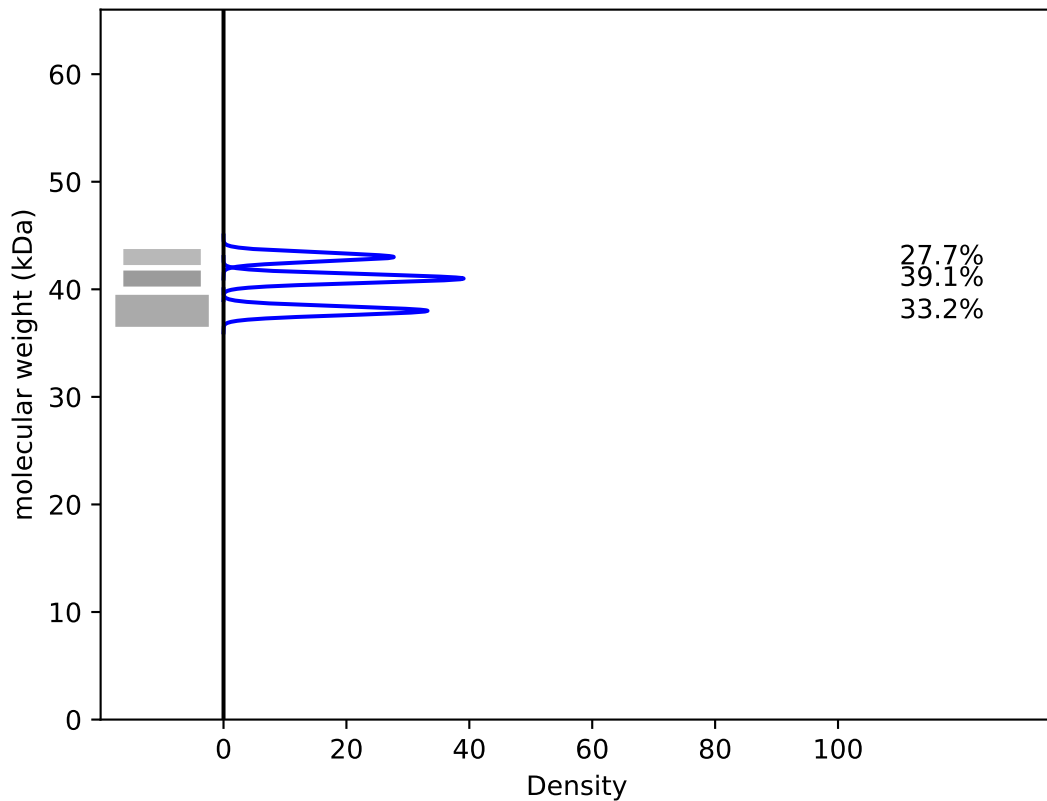

# Q15181

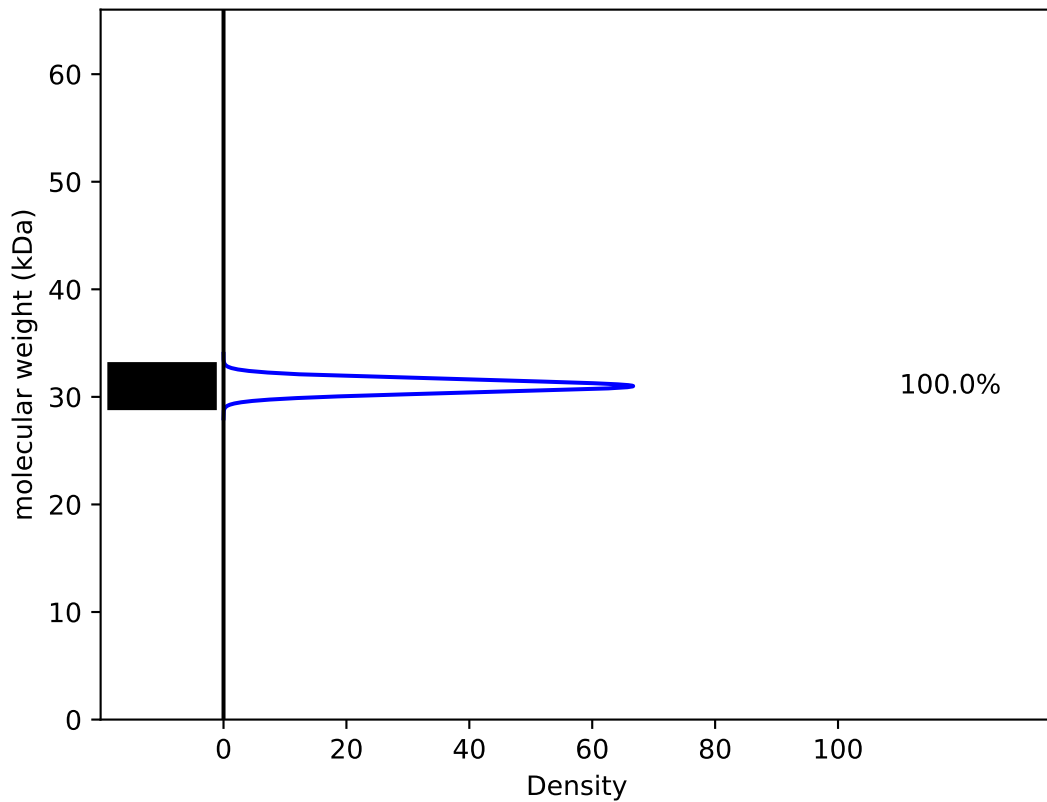

# Q15185

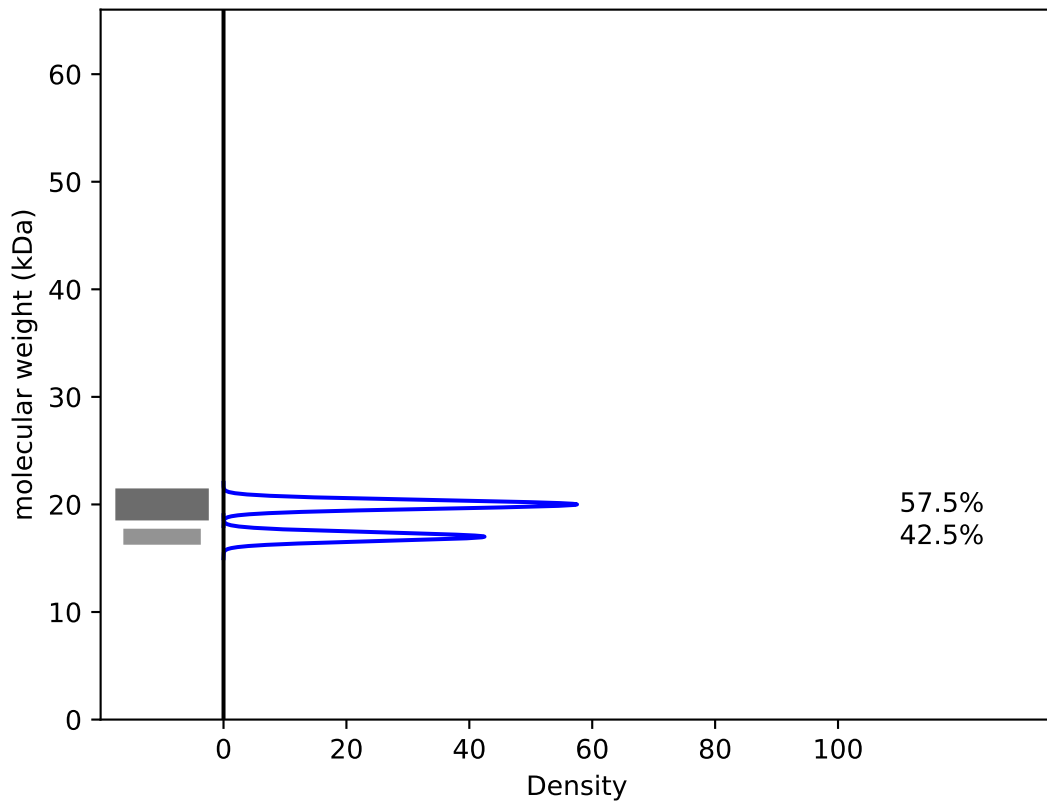



# Q15233

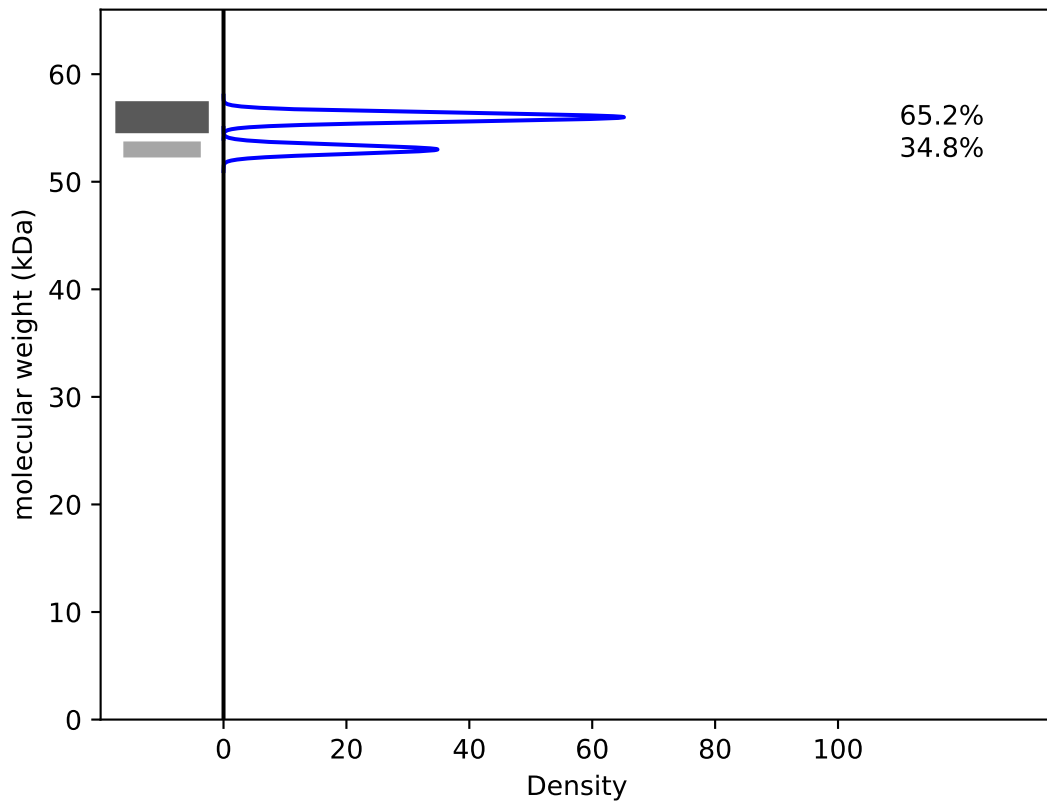

# Q15257

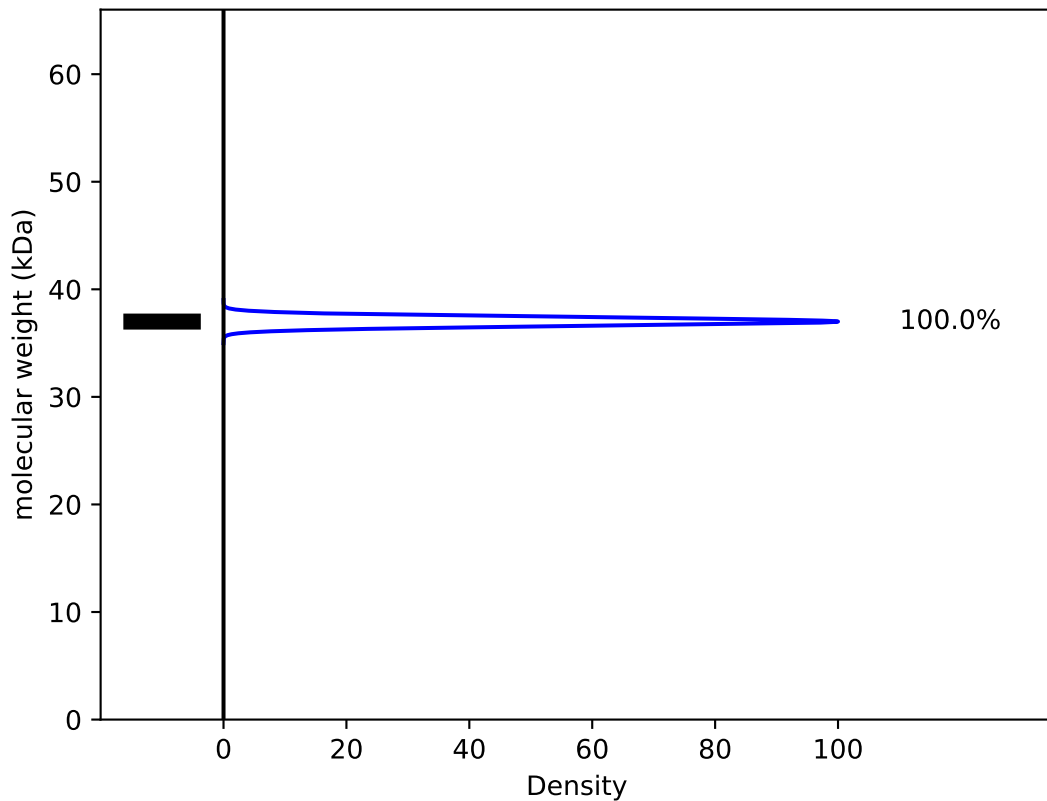

# Q15286

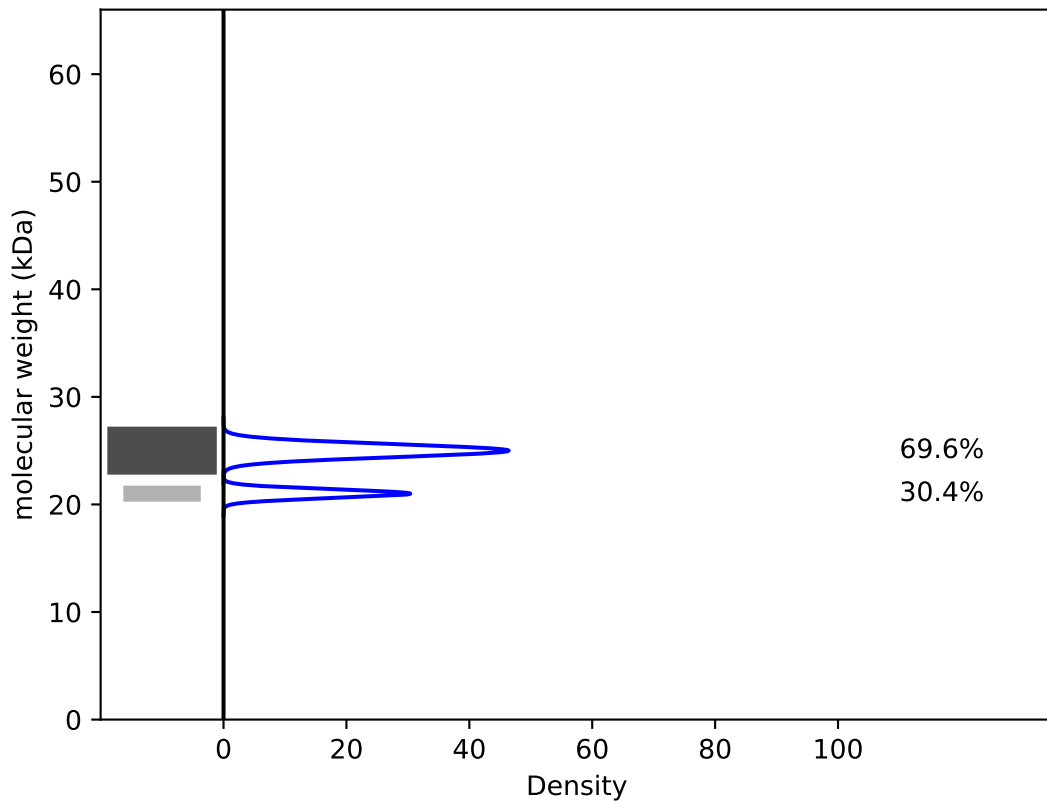

# Q15293



# Q15363



# Q15365

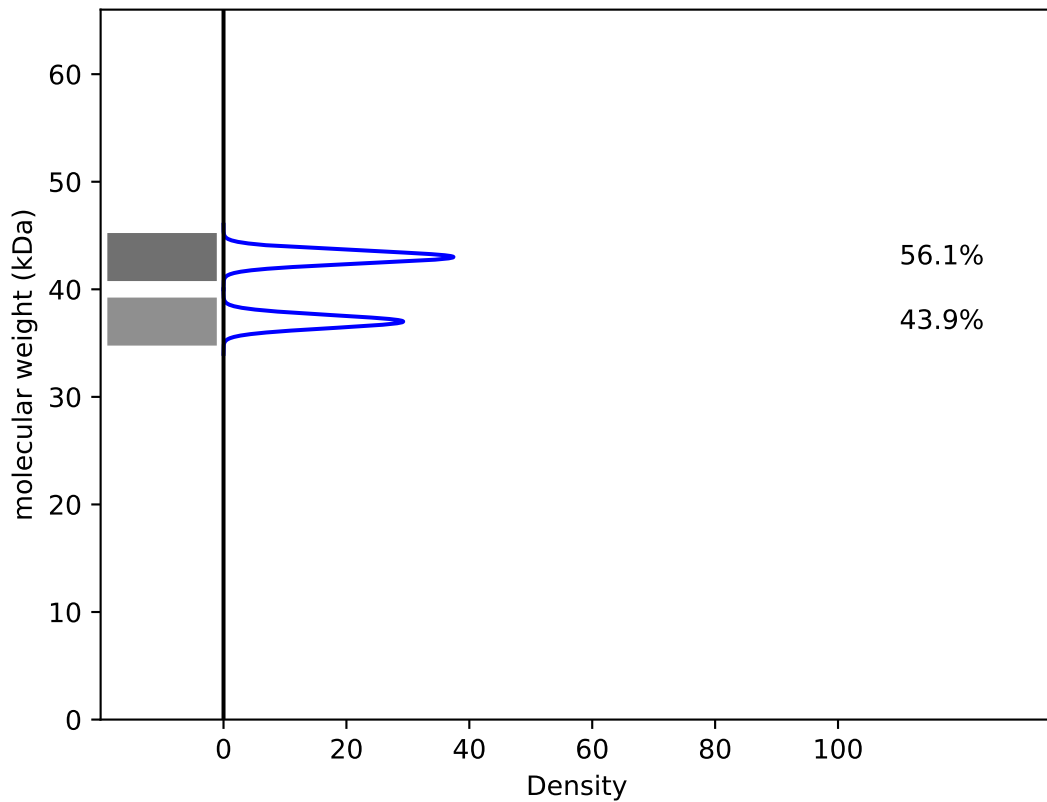

# P57723

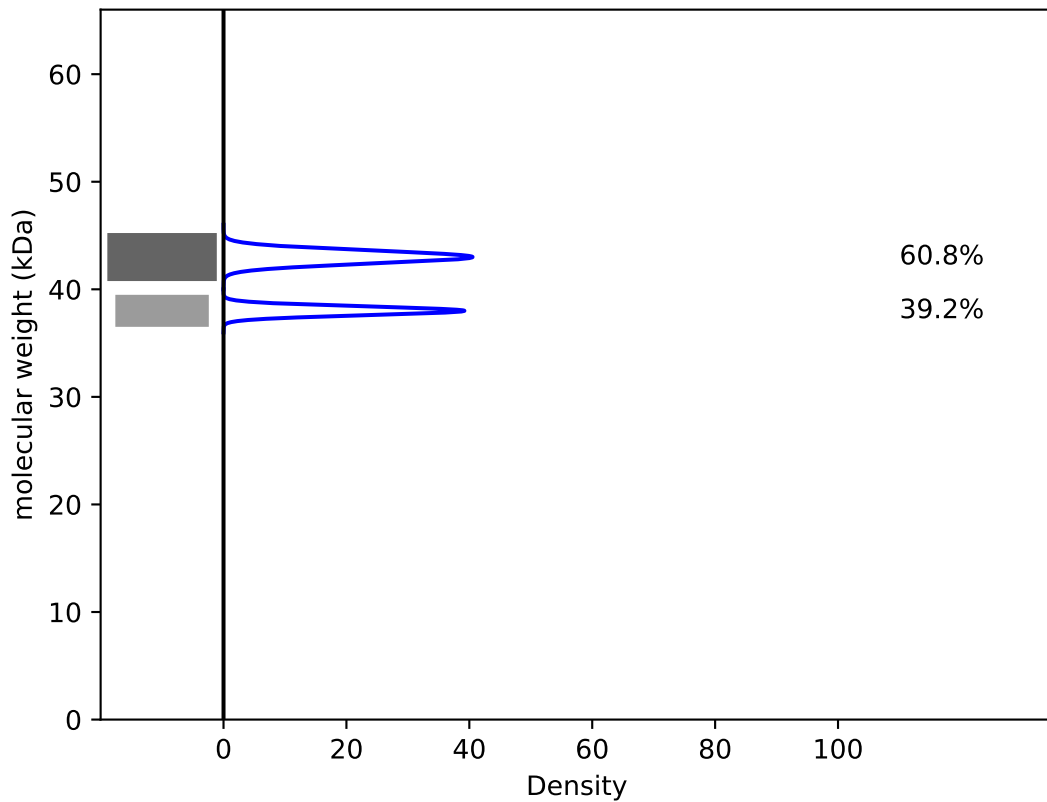

# Q15366

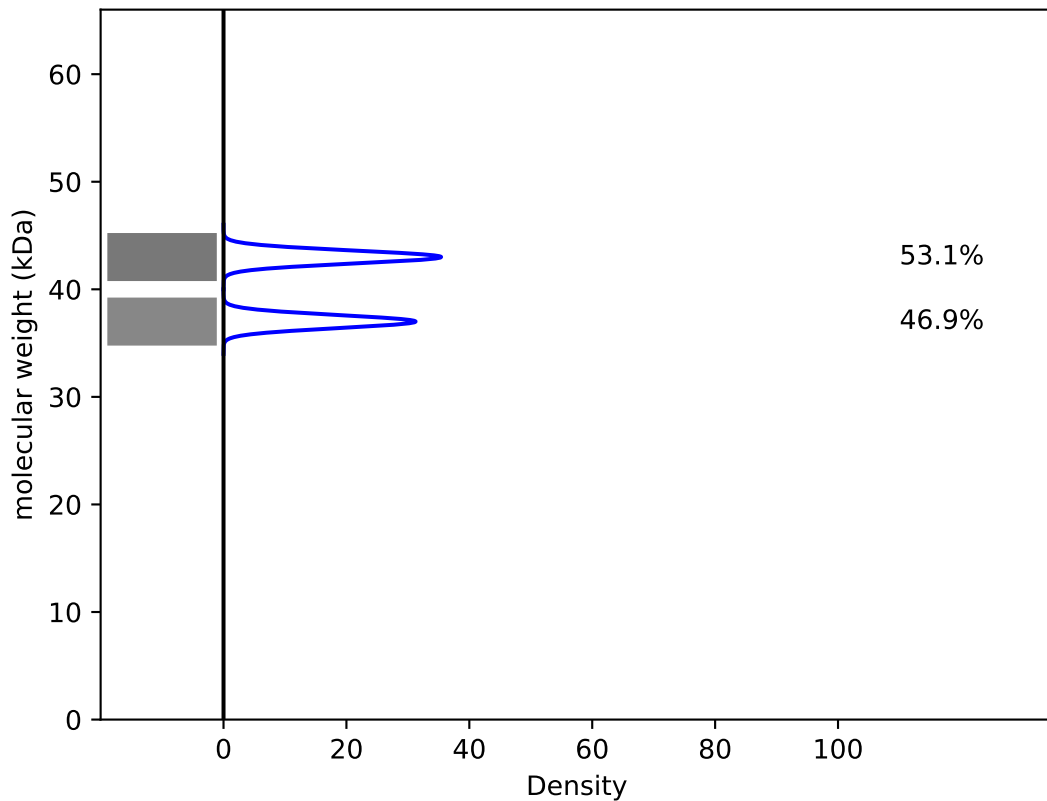



# Q15392

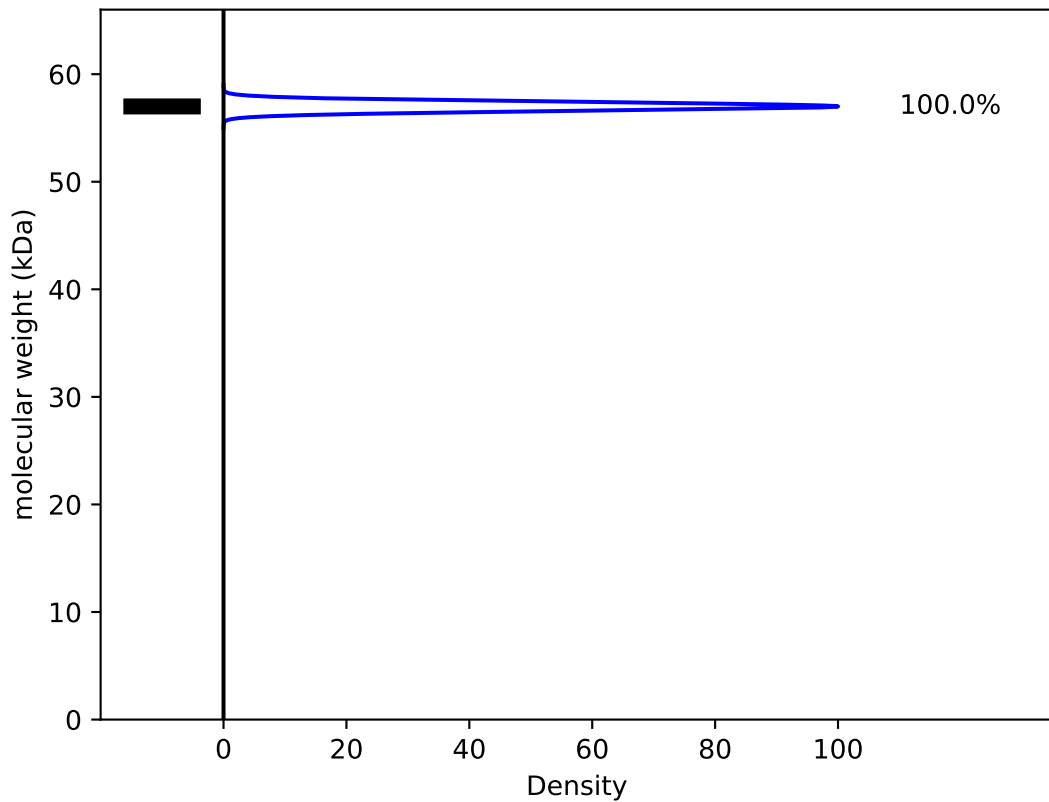

# Q15404



# Q15427



# Q15435



# Q15631



# Q15645

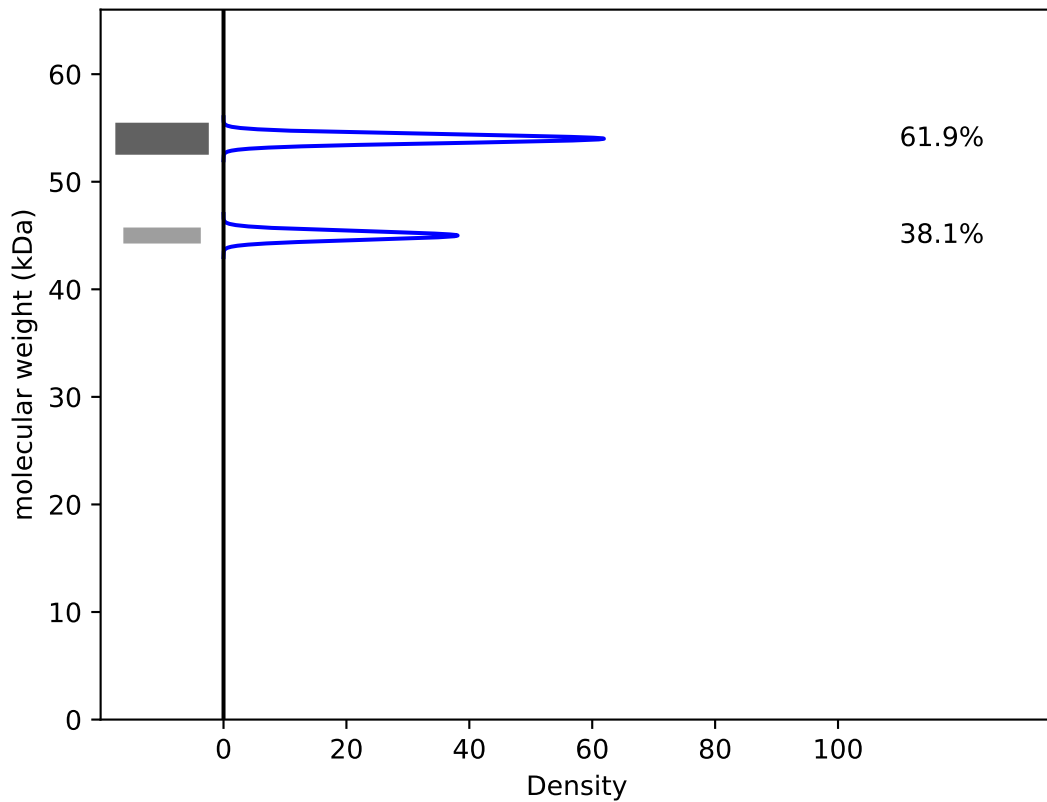

# Q15691

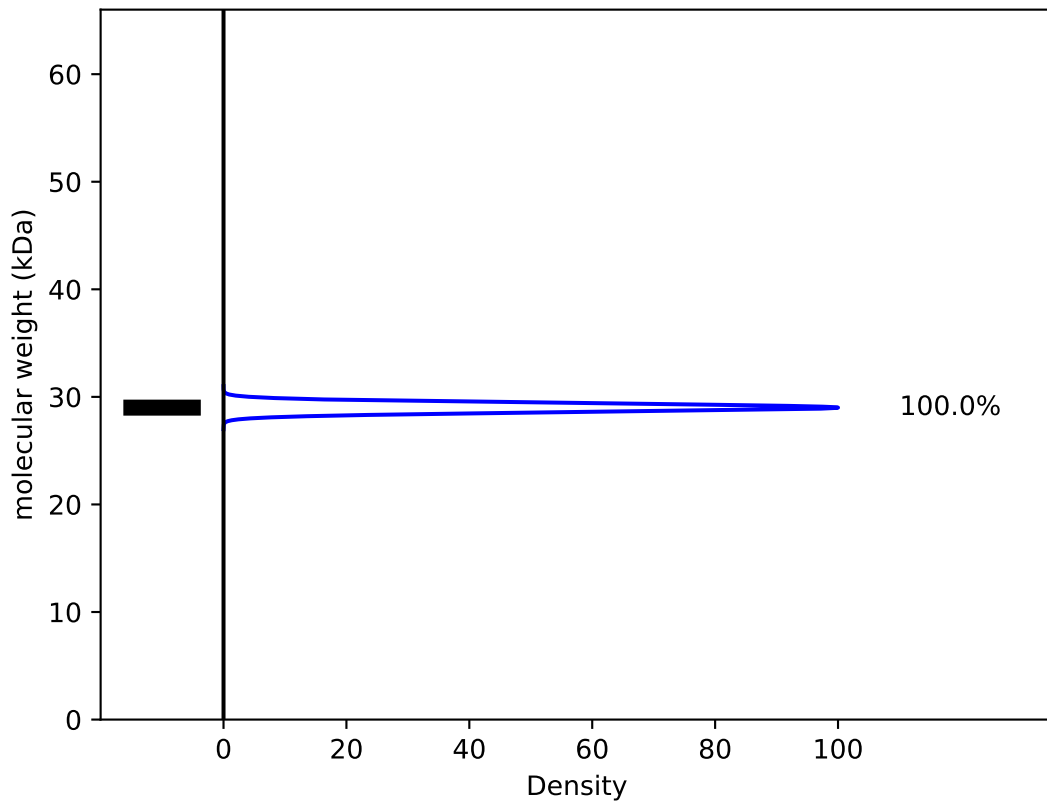

# Q15717





# Q12926



# Q15738



# Q15785

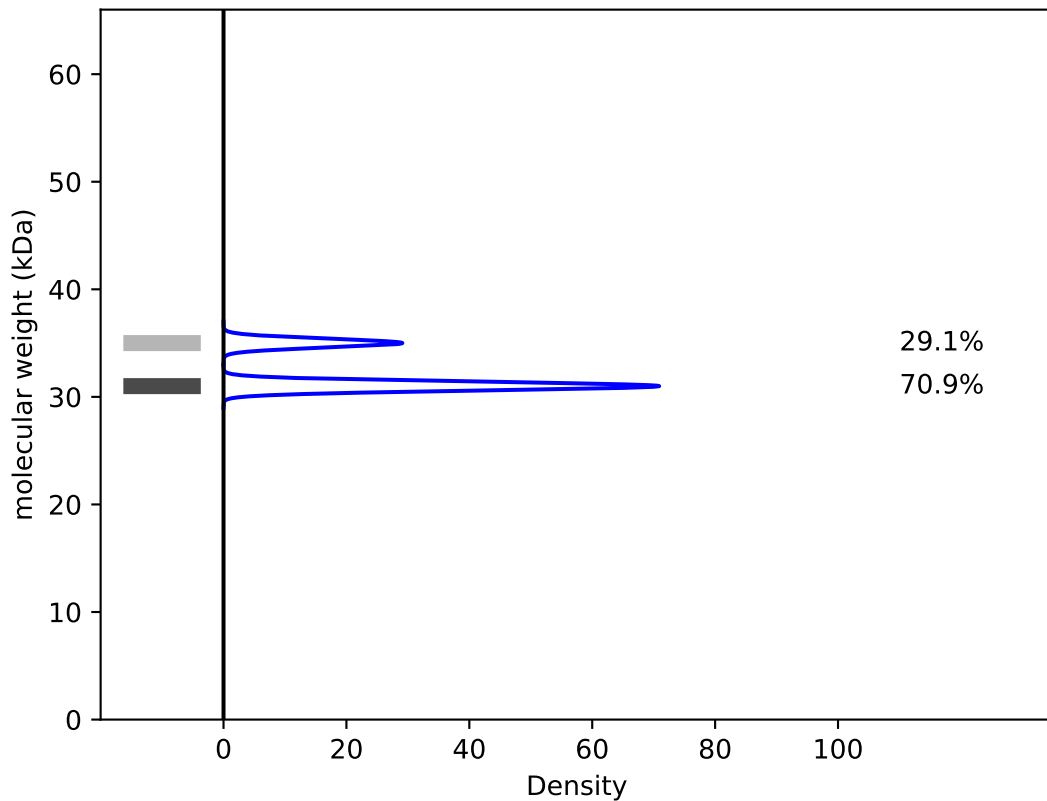

# Q15904

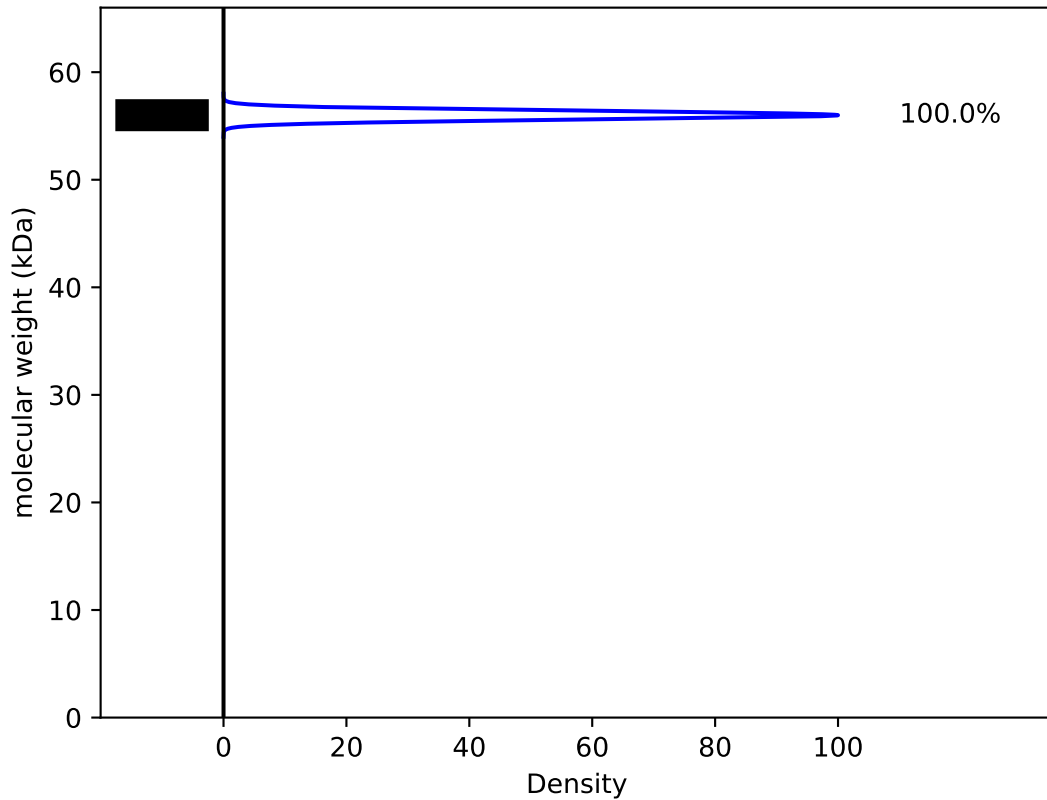

# Q15907

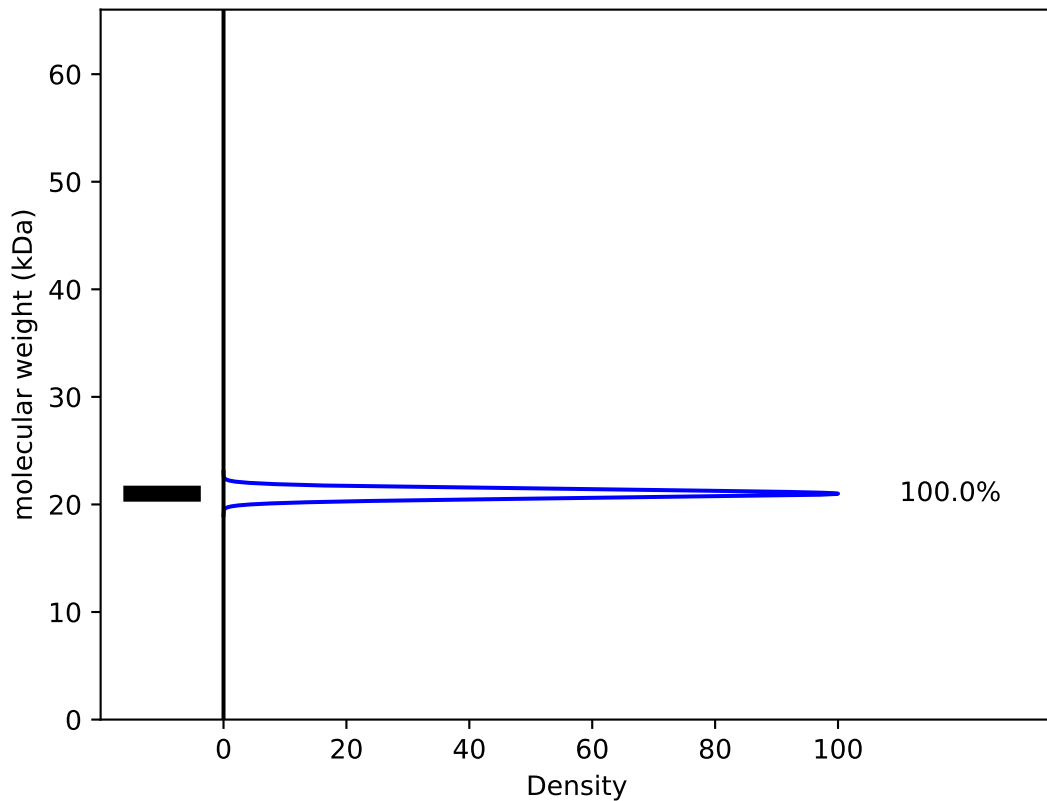

P62491



P57735



# Q16186

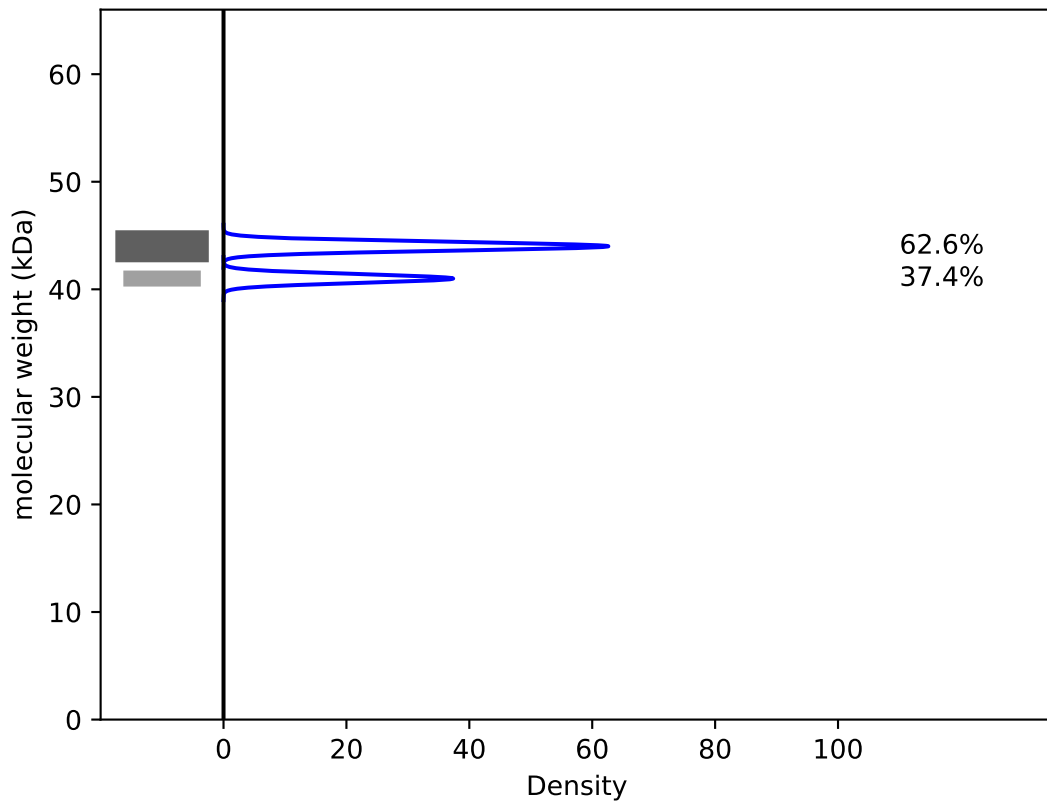



# Q16222

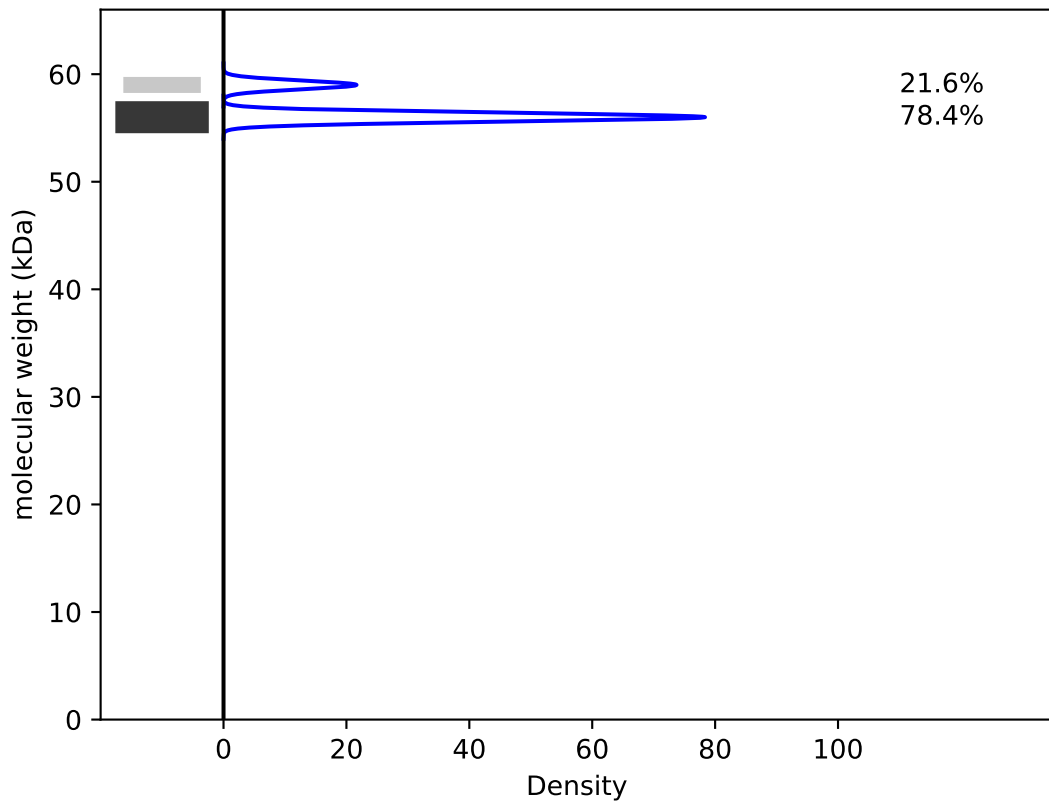

# Q3KQV9

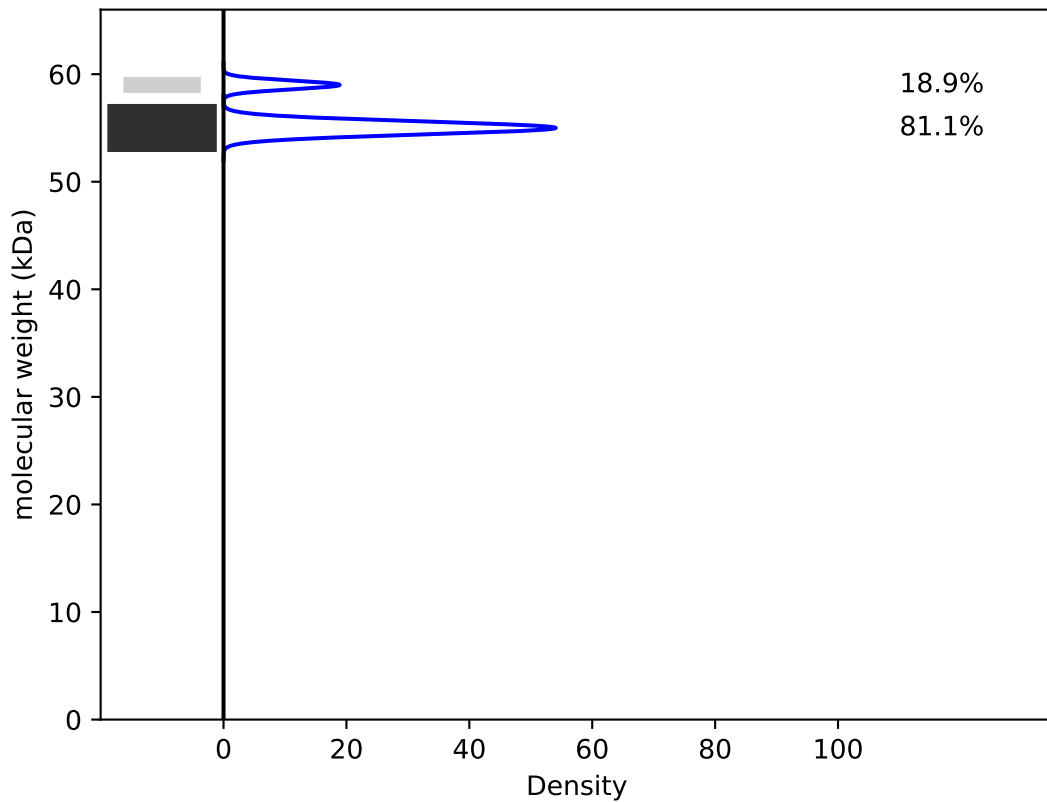

# Q16401



# Q16539

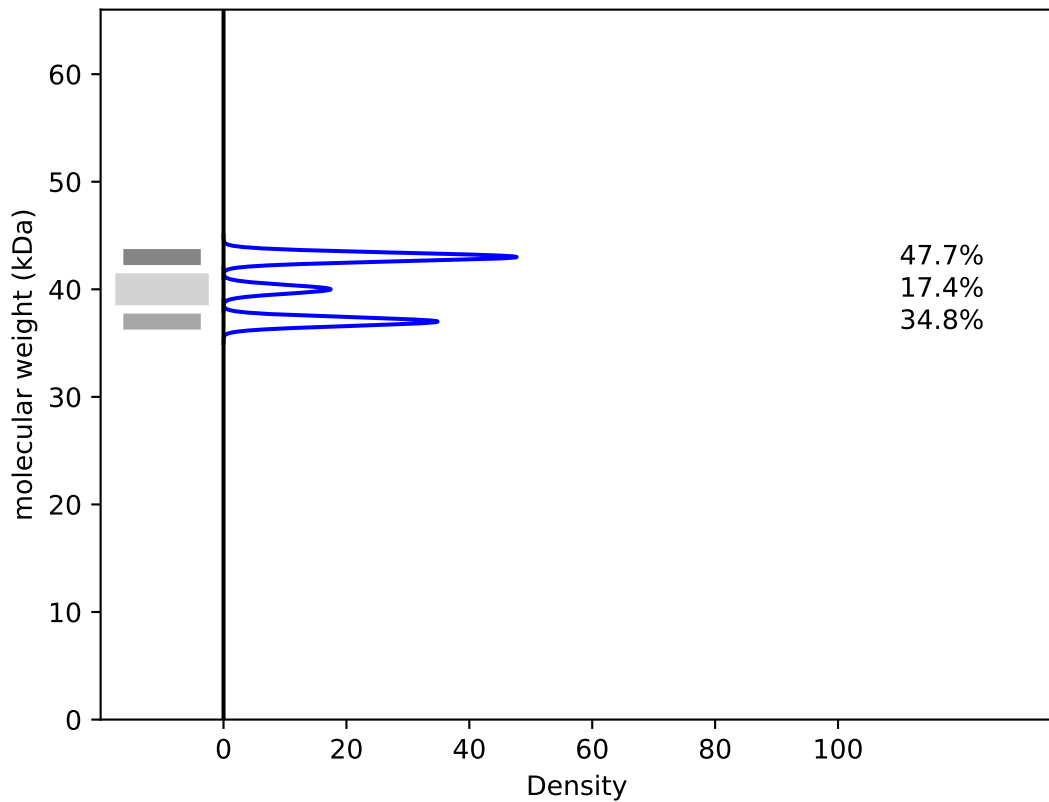

# Q16543



# Q14195



# Q16629



# Q16658





# Q16698



# Q16719



# Q16740

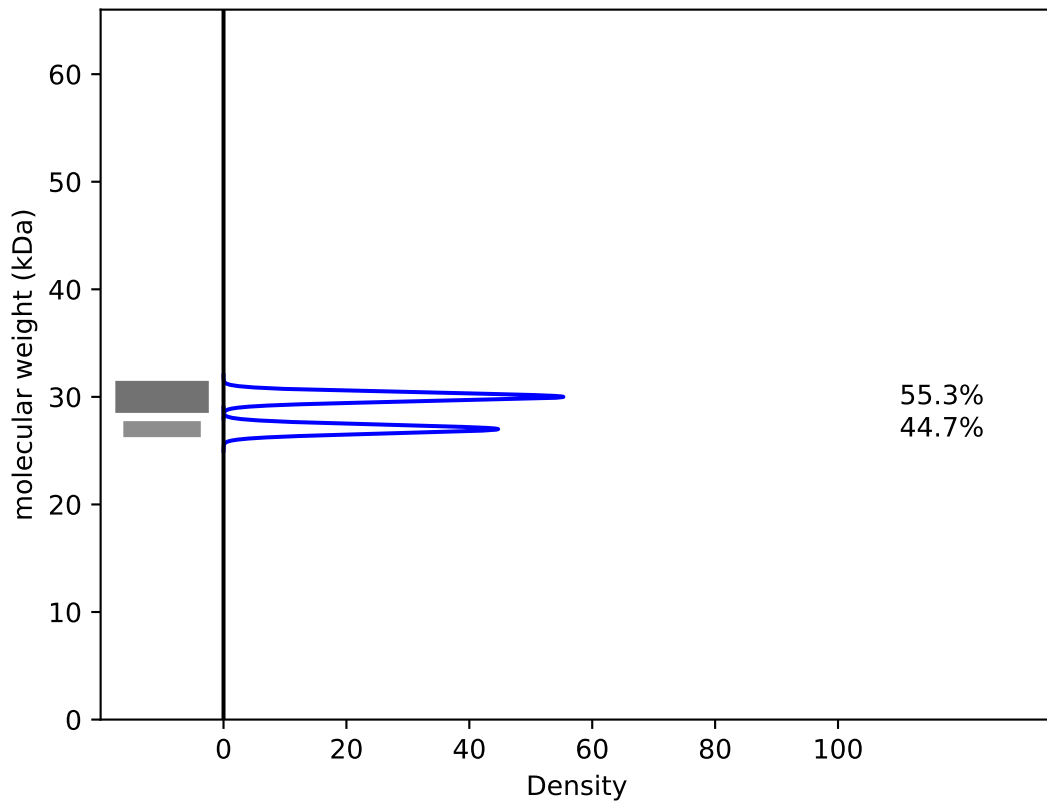

# Q16762



# Q16774

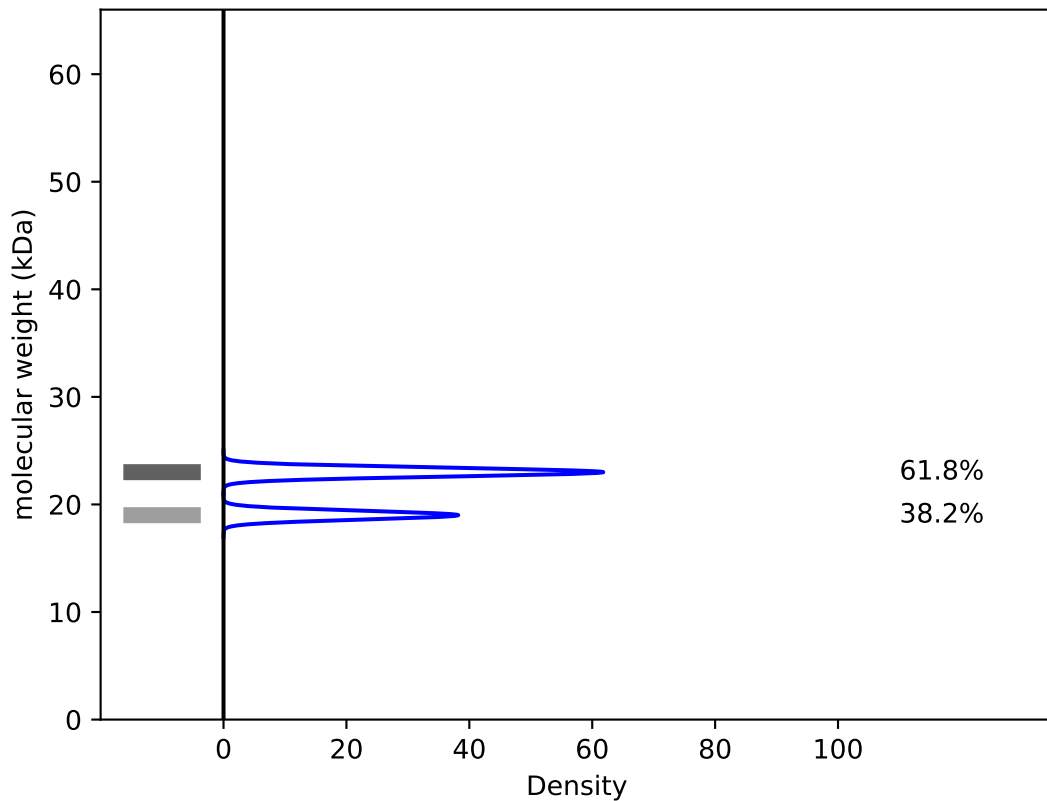

# Q16850



# Q16851



# Q2TAY7





# Q30201



# Q3LXA3



# Q3MHD2

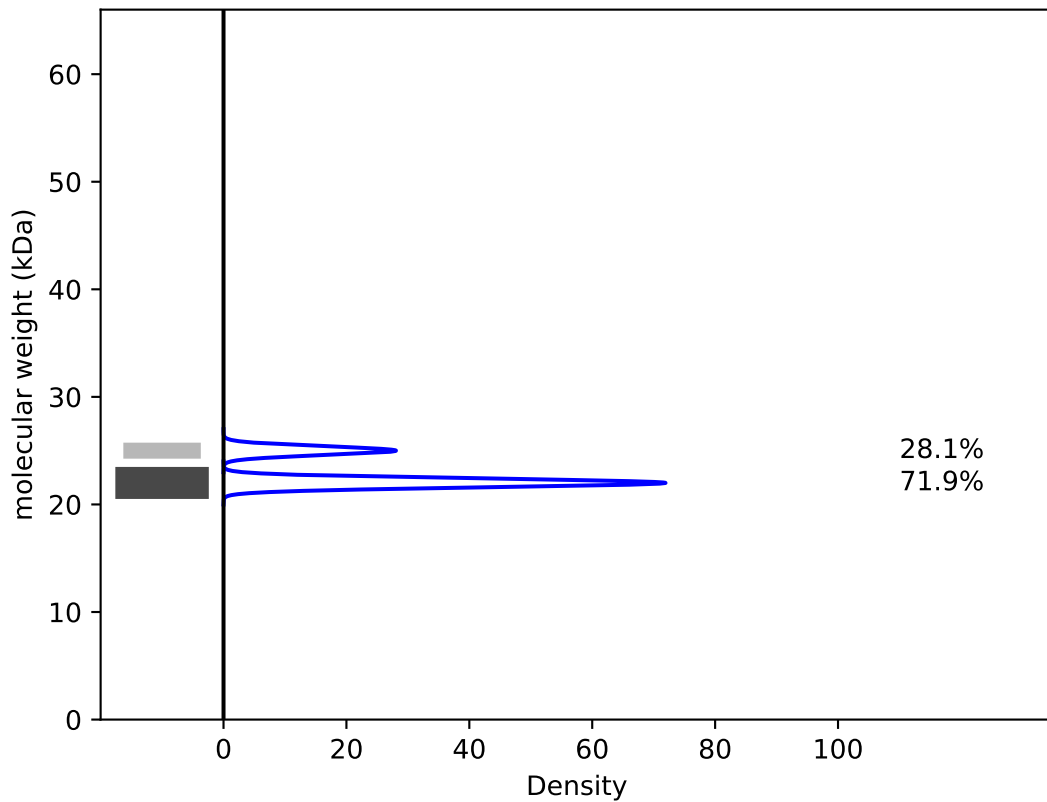

# Q3ZCQ8

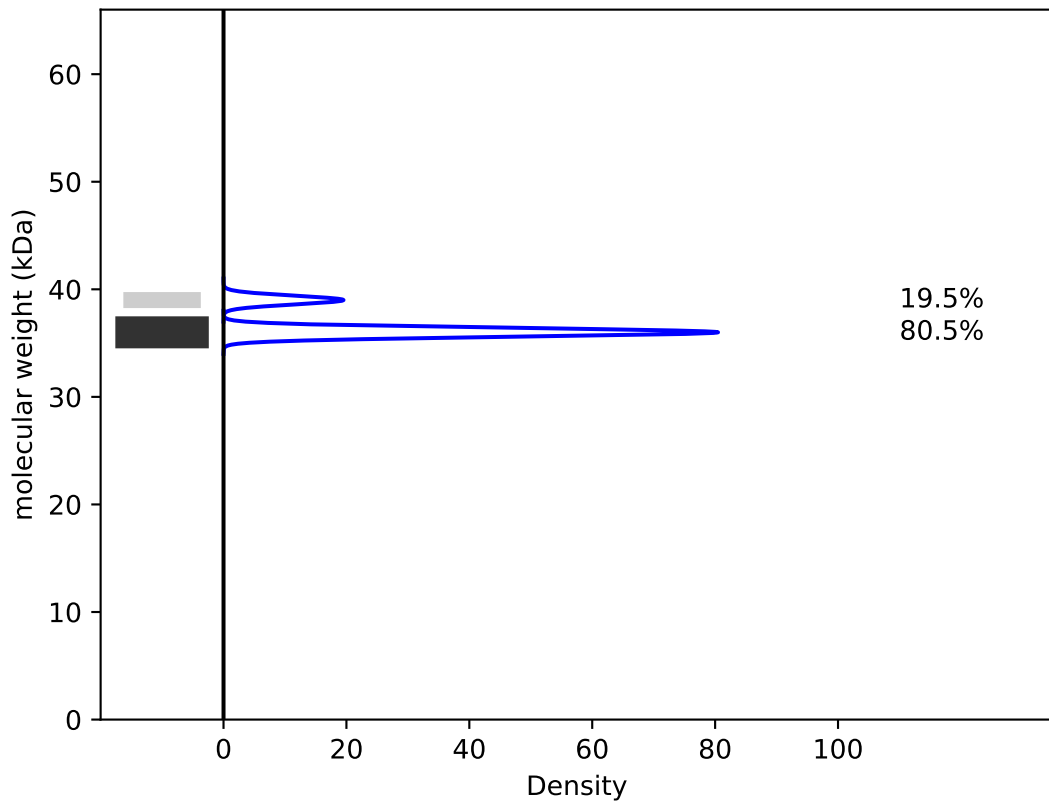

# Q4G0N4



# Q53EL6



# Q53GQ0

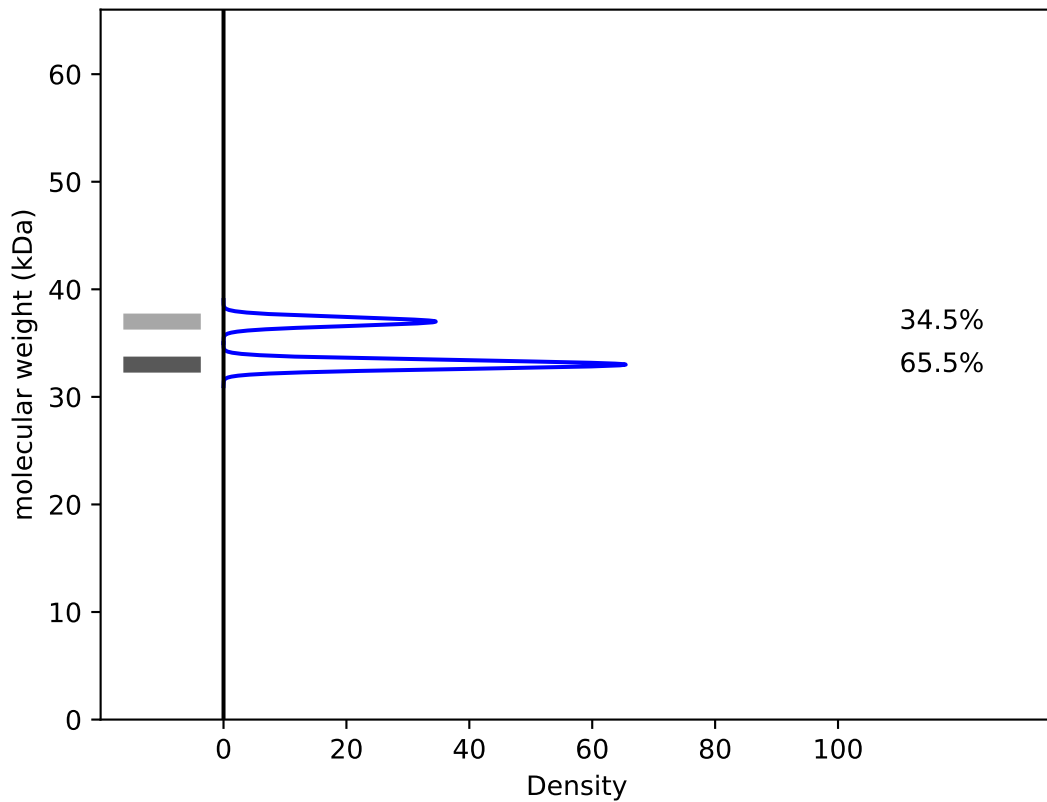

# Q53H82





# Q53H96



# Q562R1

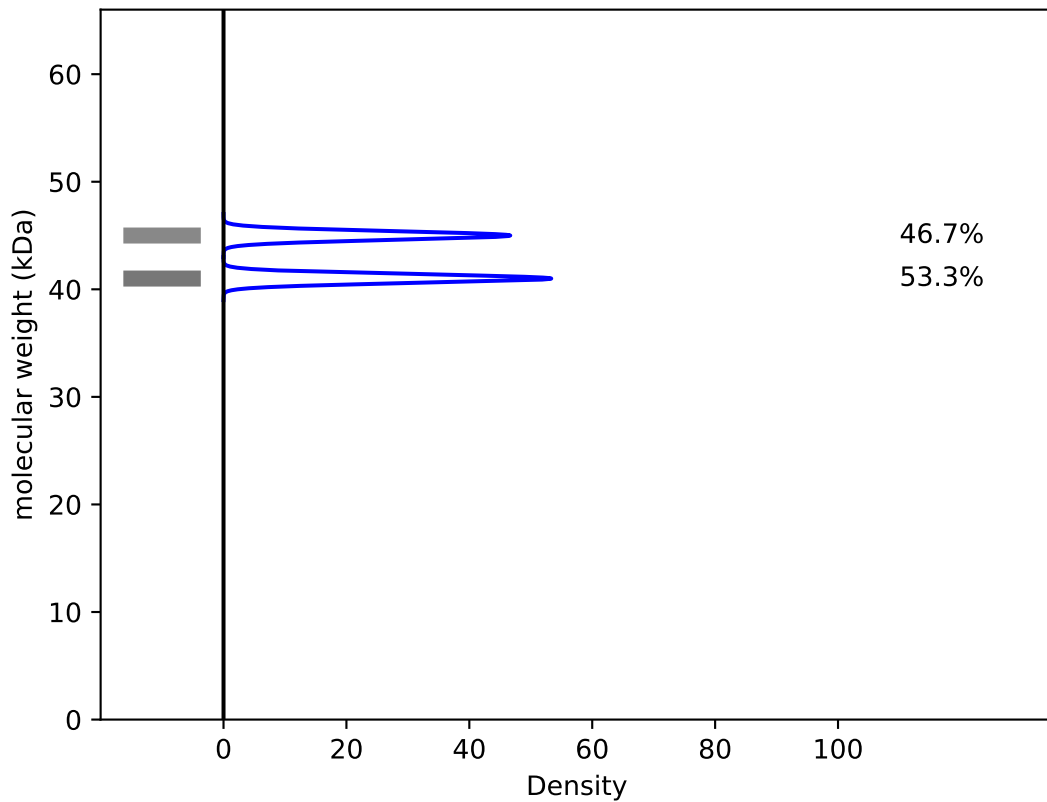

# Q58FF8



# Q5RKV6



# Q5T6V5



# Q5VT66

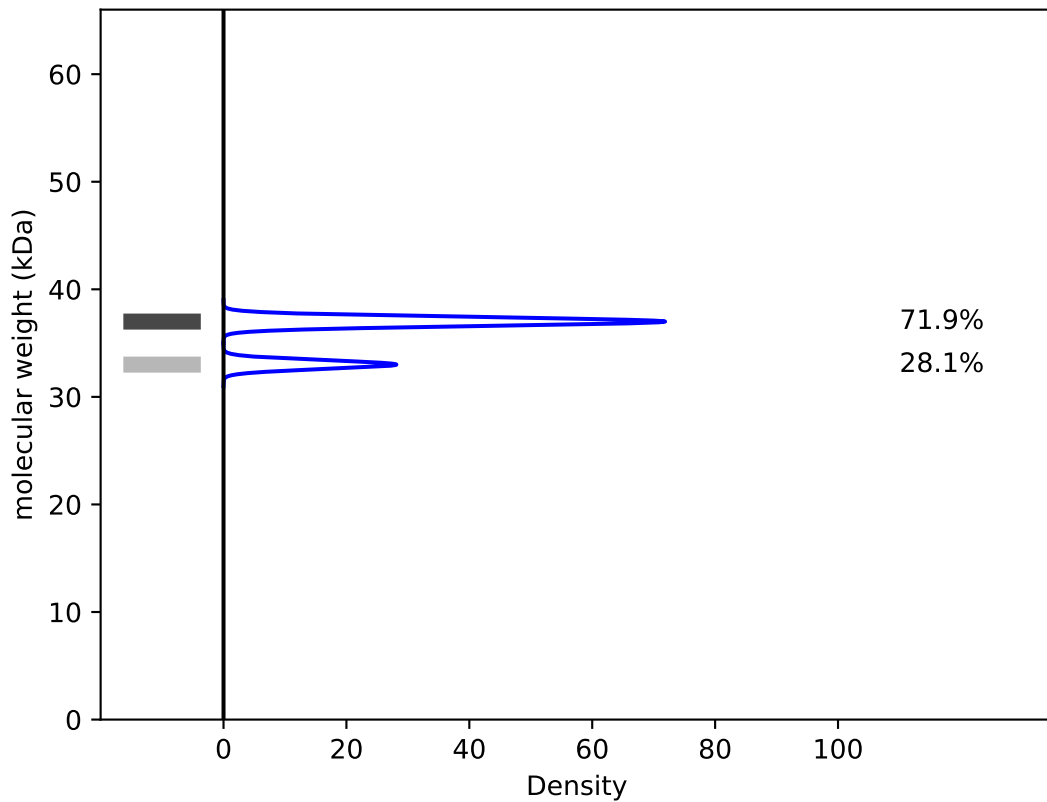

# Q969Z3



# Q5VT79

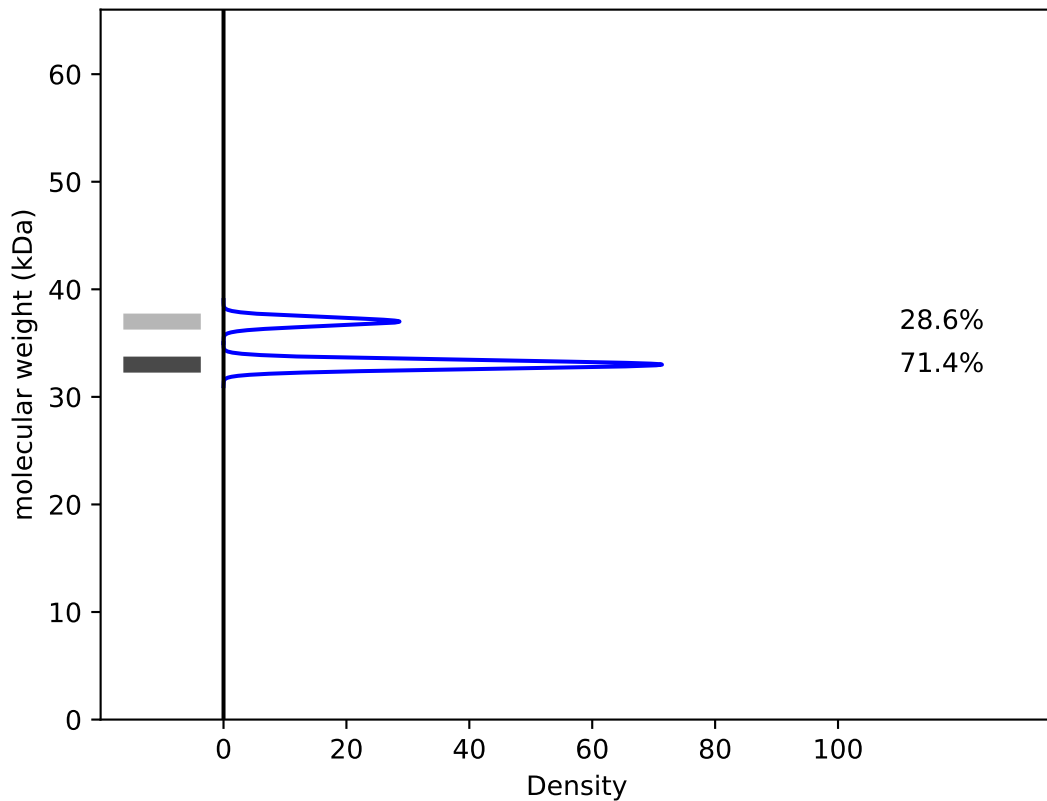



# P13928

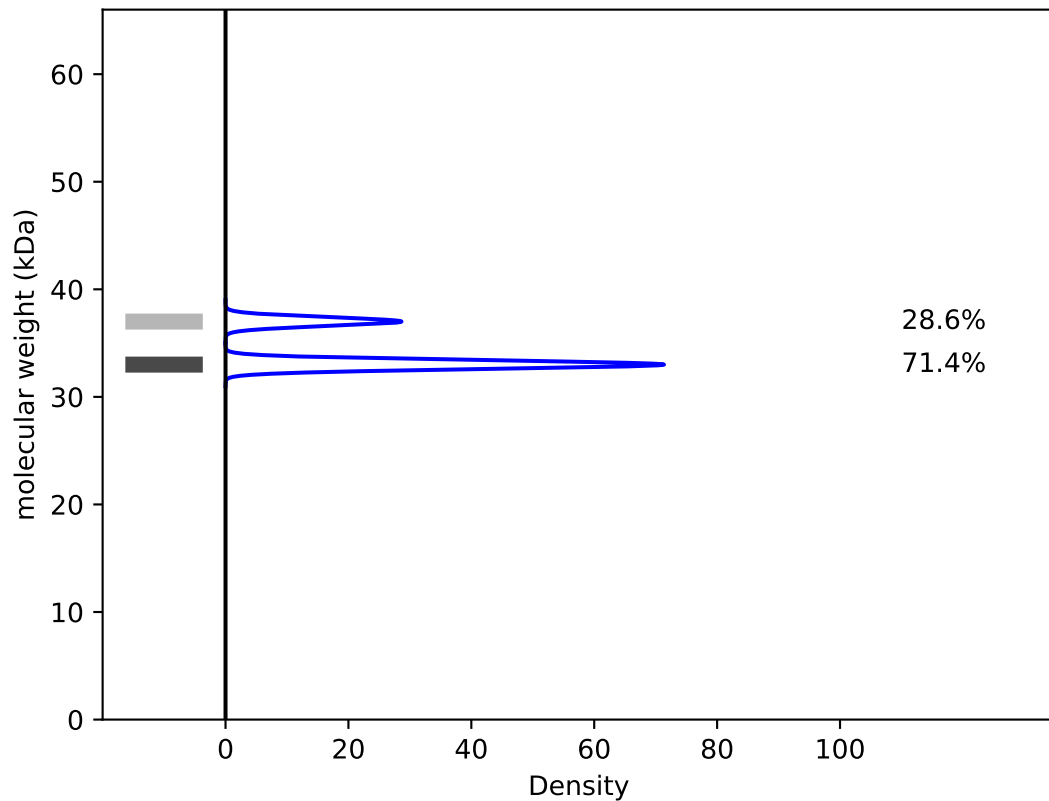

# Q5VW32

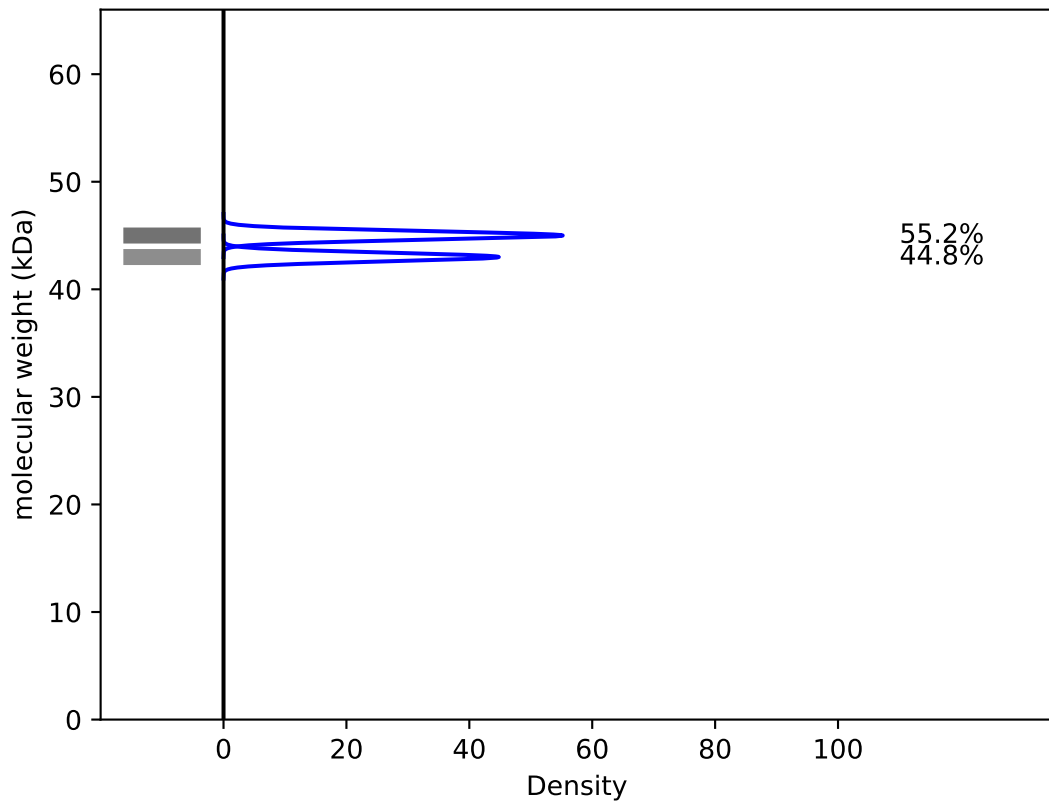

# Q5VWZ2

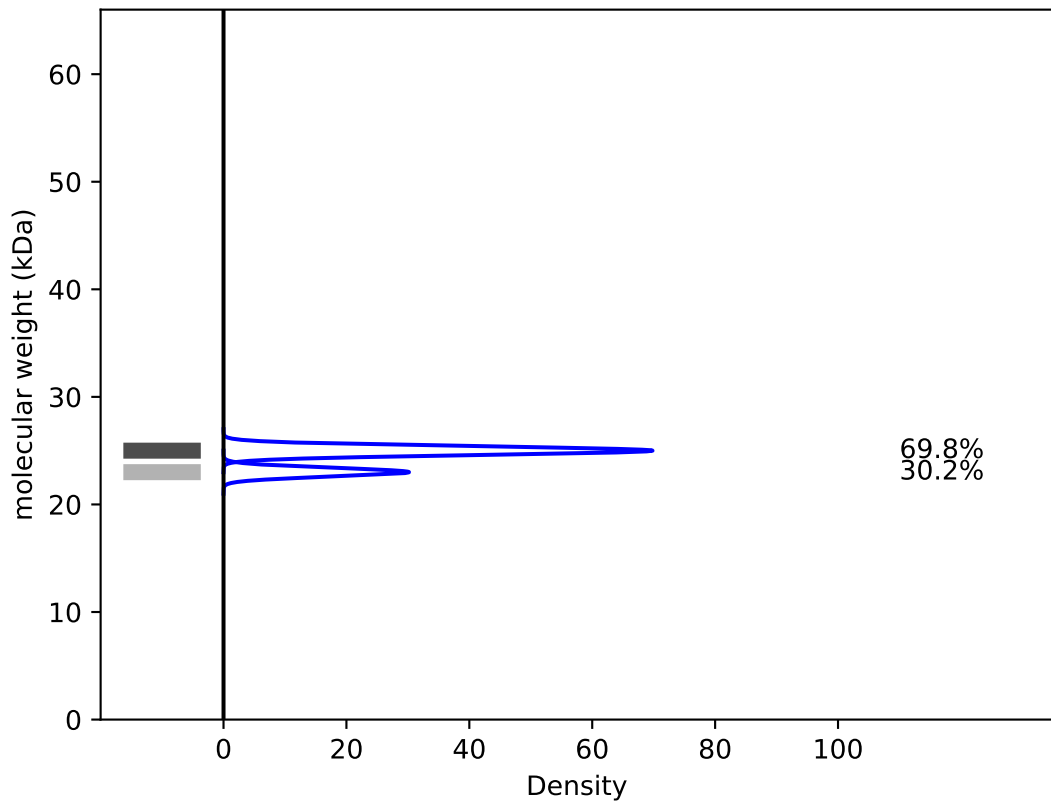

# Q68CQ7



# Q6DD88



# Q6DKI1

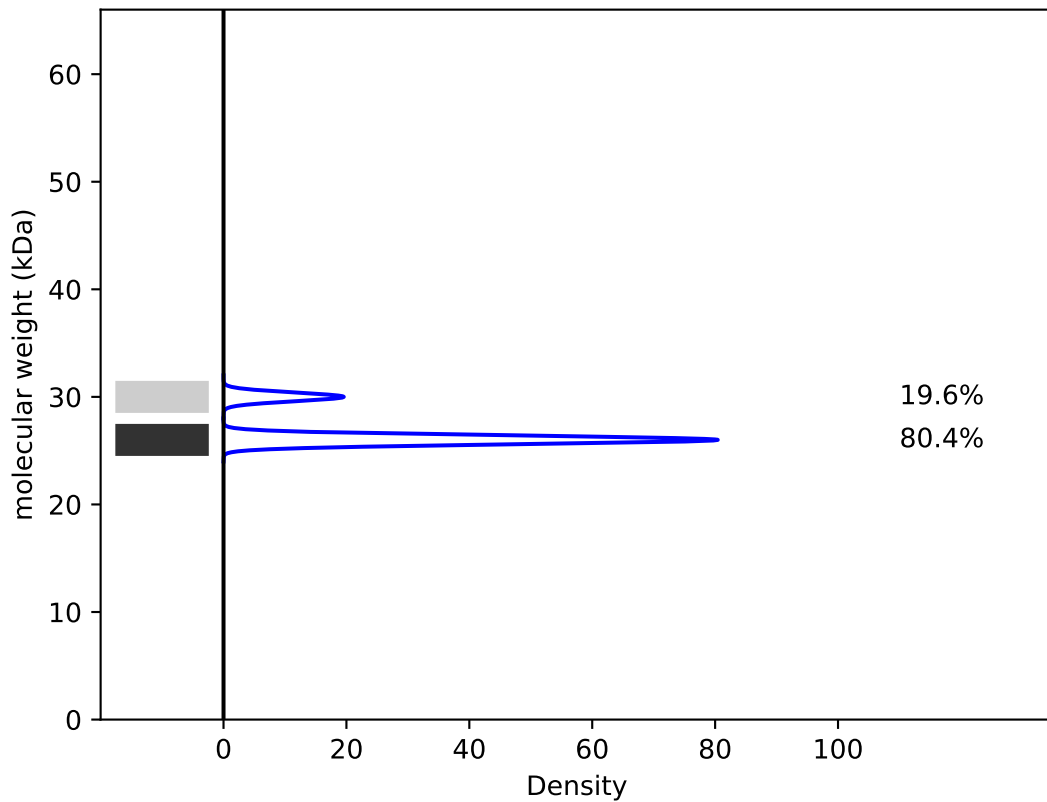

# Q6FI81



# Q6IBS0

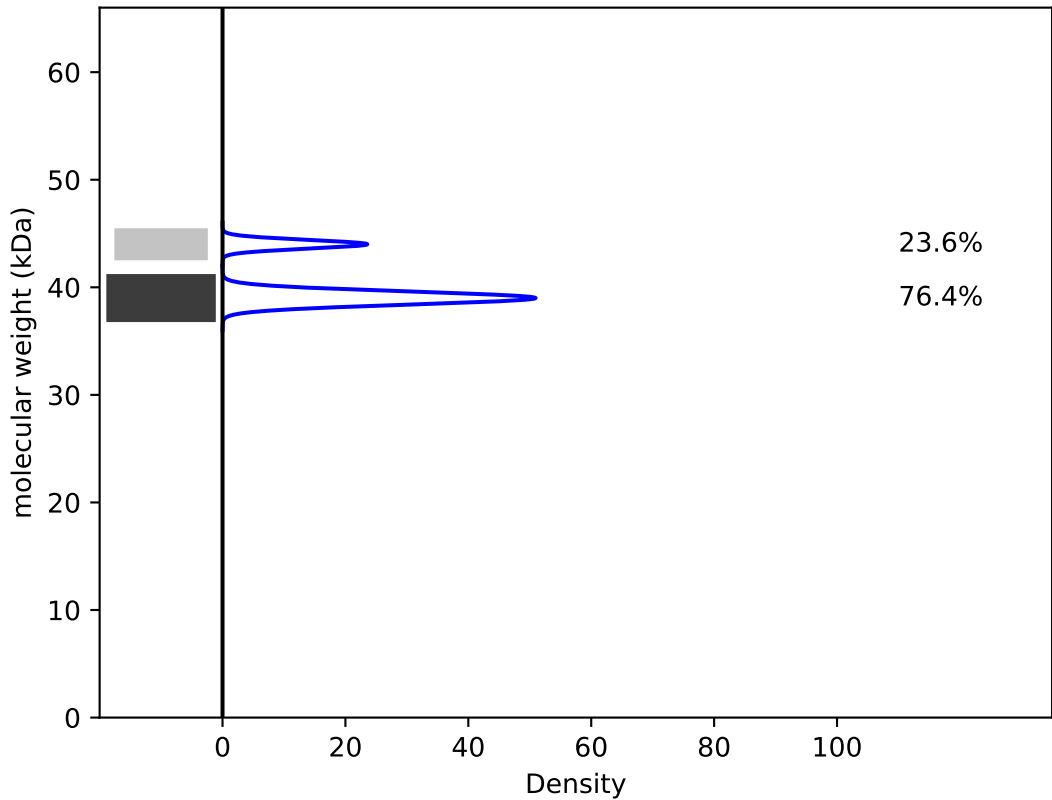



# Q6IQ22



# Q6NZI2



# Q6P587



# Q6PIU2

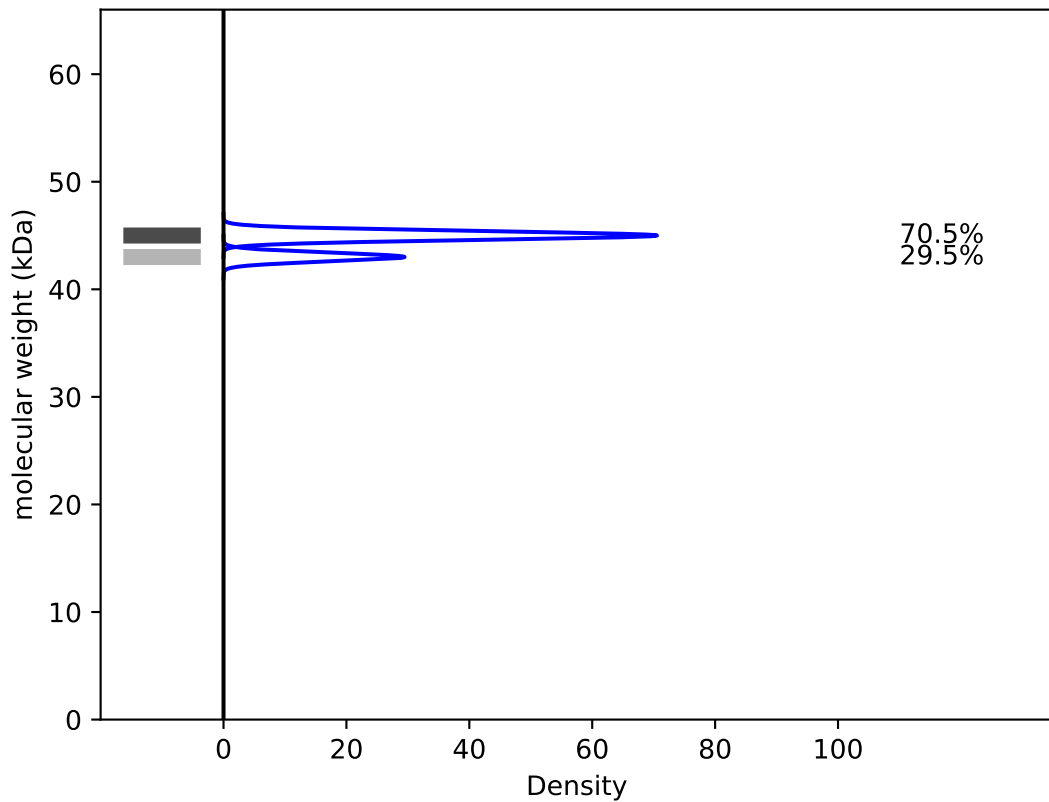

# Q9BYX7

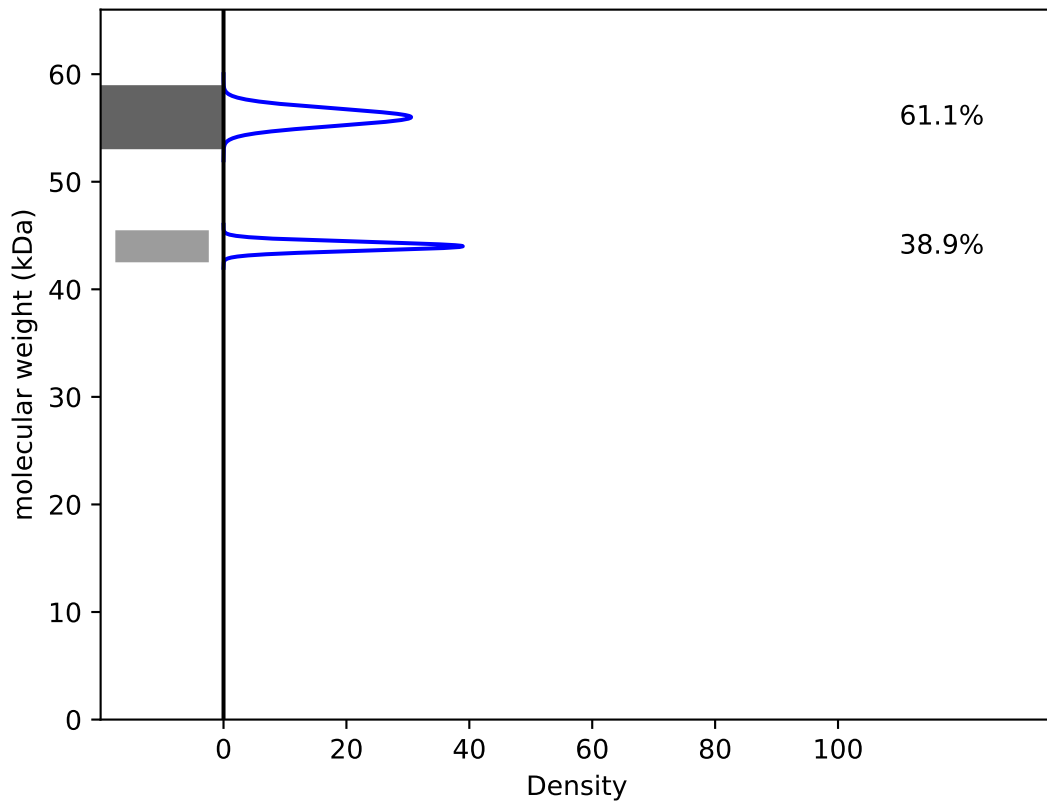

# Q6UXN9



# Q6XQN6



# Q6YN16

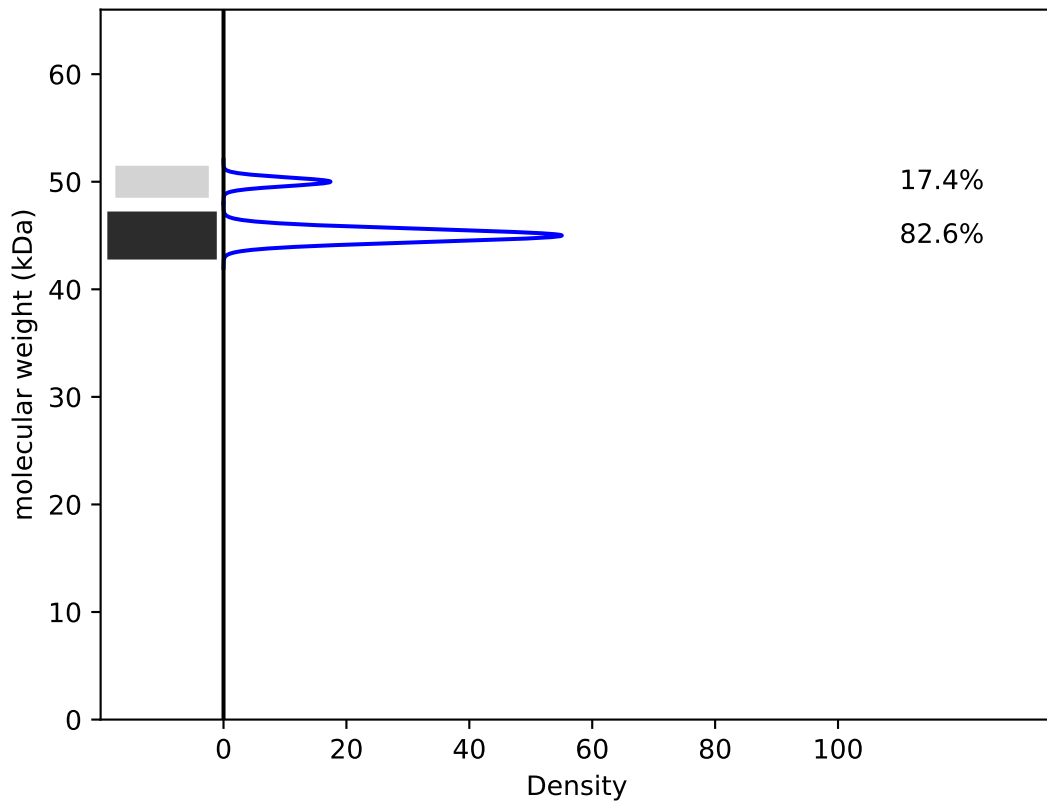



# Q70UQ0



# Q70Z53



# Q7L0Y3



# Q7L1Q6



# Q7L2H7

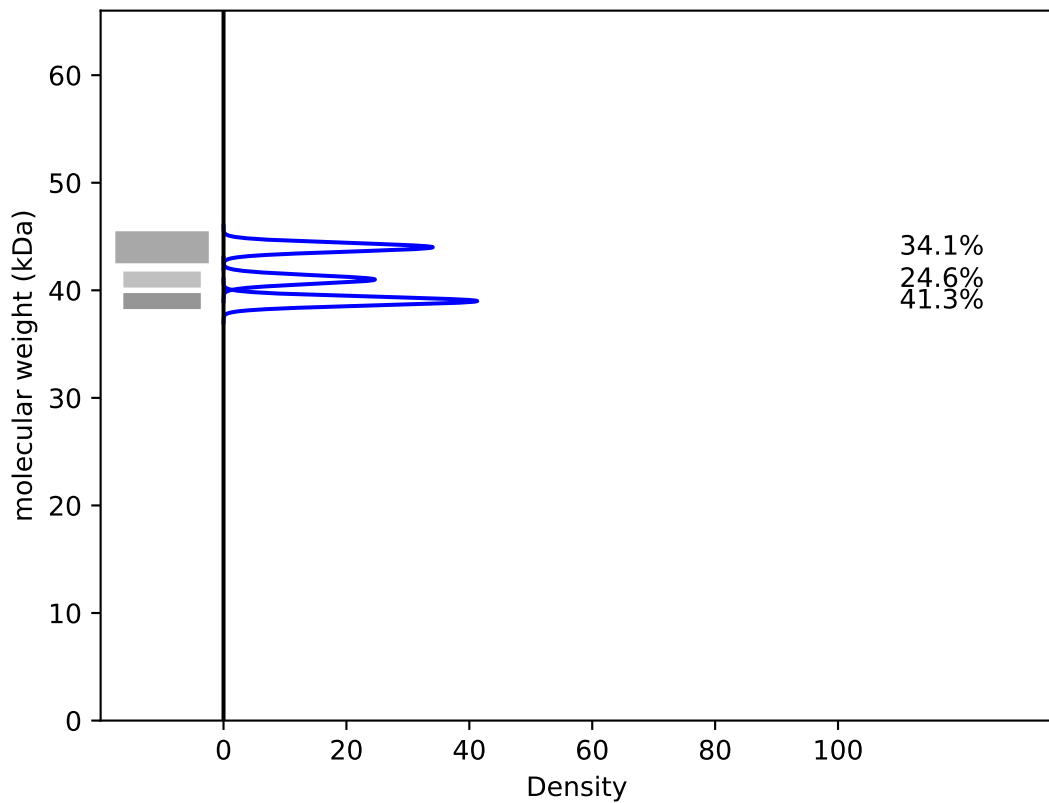

# Q7L523

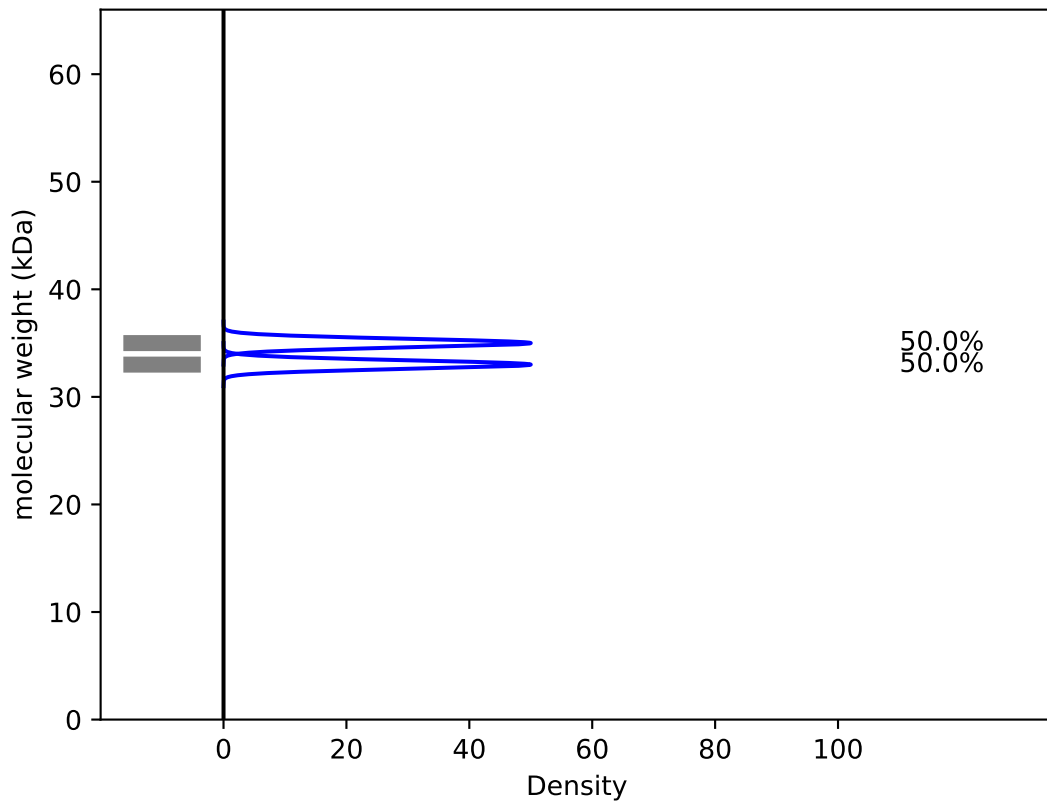

# Q7L5N1

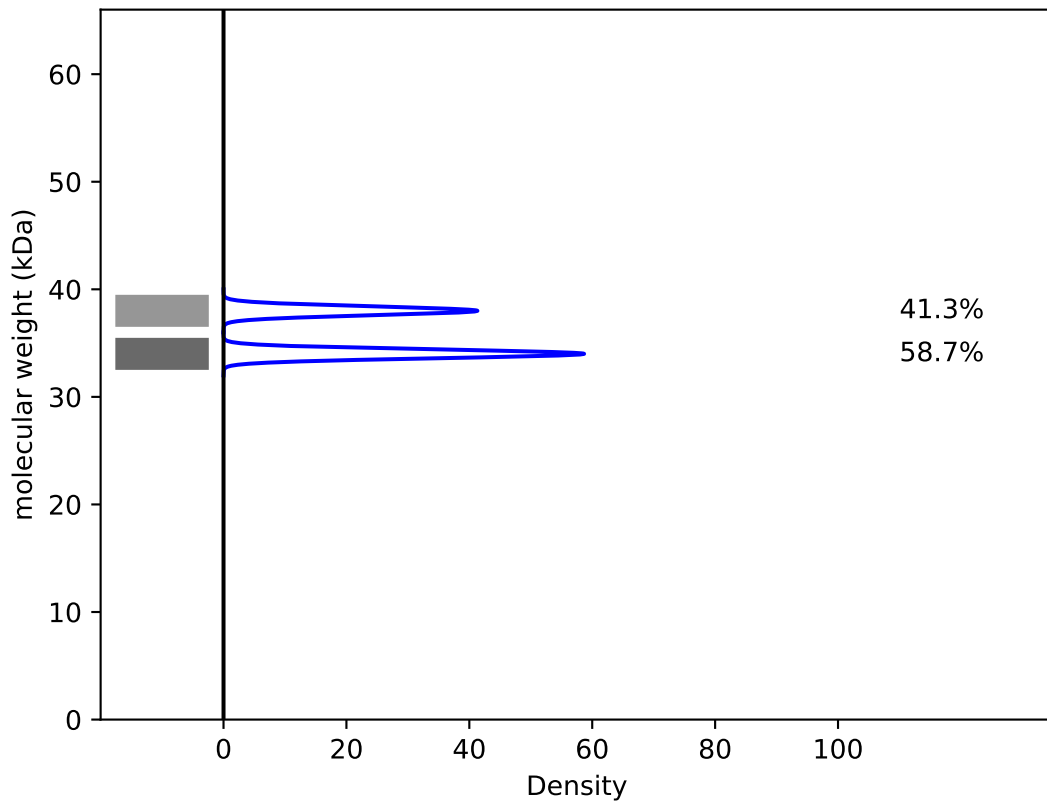

# Q9H8S9





# Q7L9L4



# Q7Z3B4

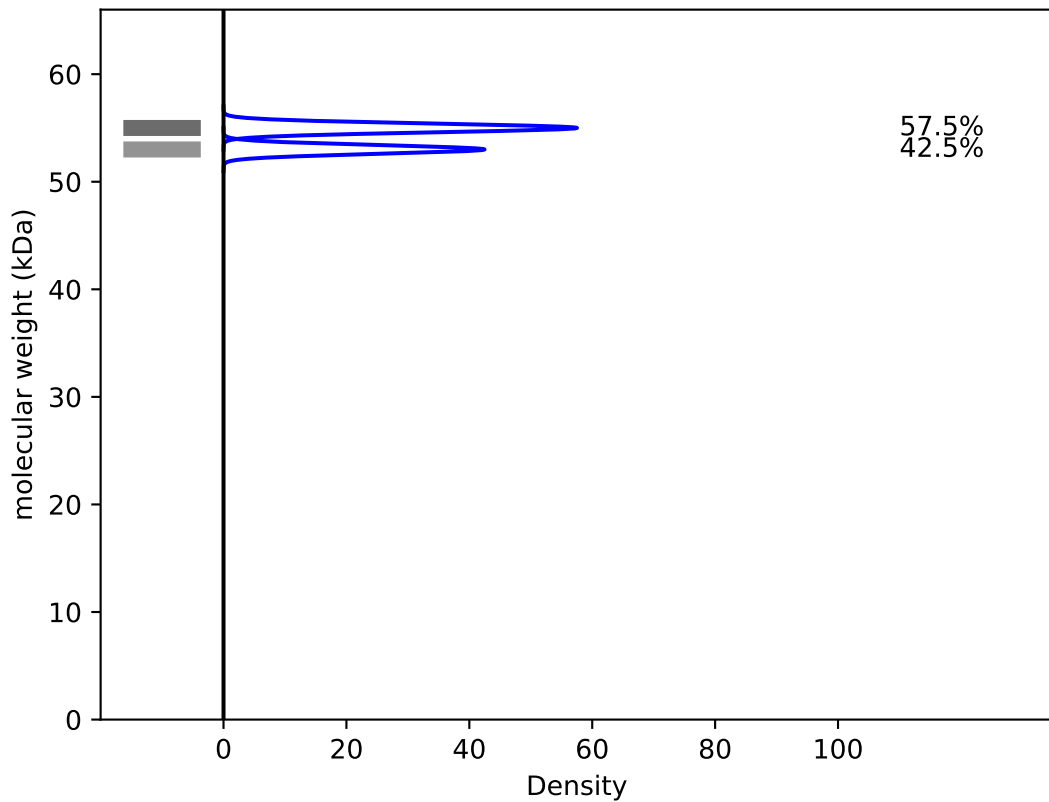

# Q7Z4H8

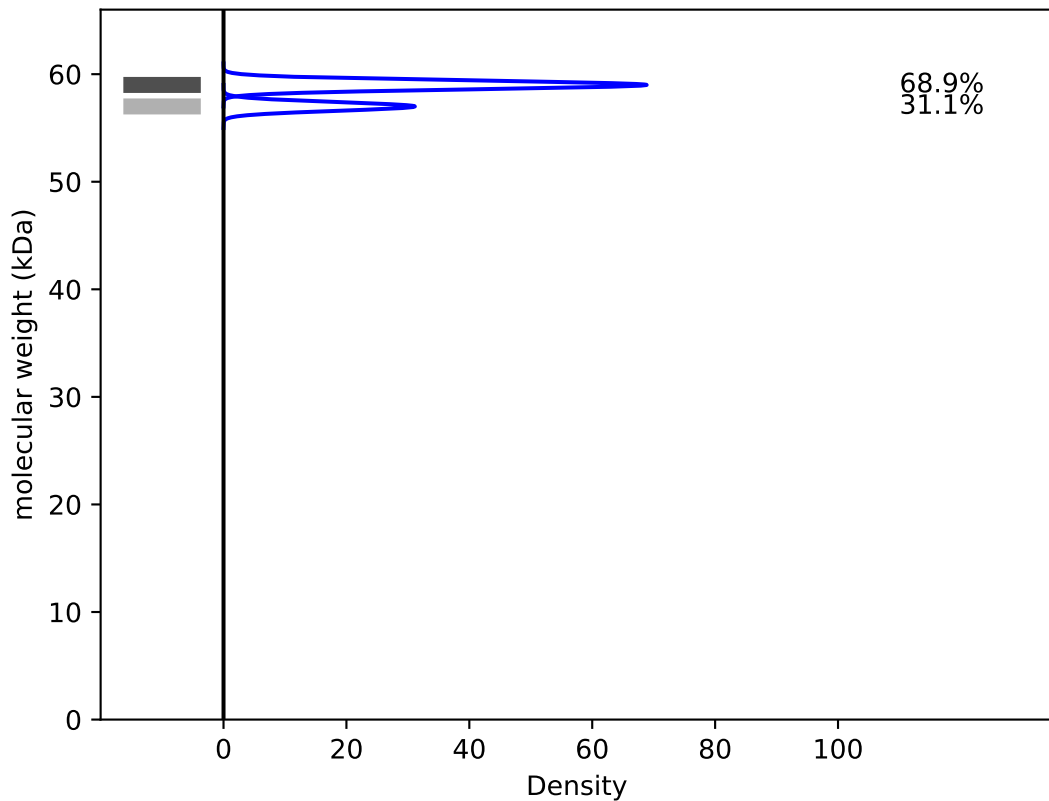

Q7Z4W1



Q7Z7H8



# Q86TX2



# Q86U90



# Q86V81

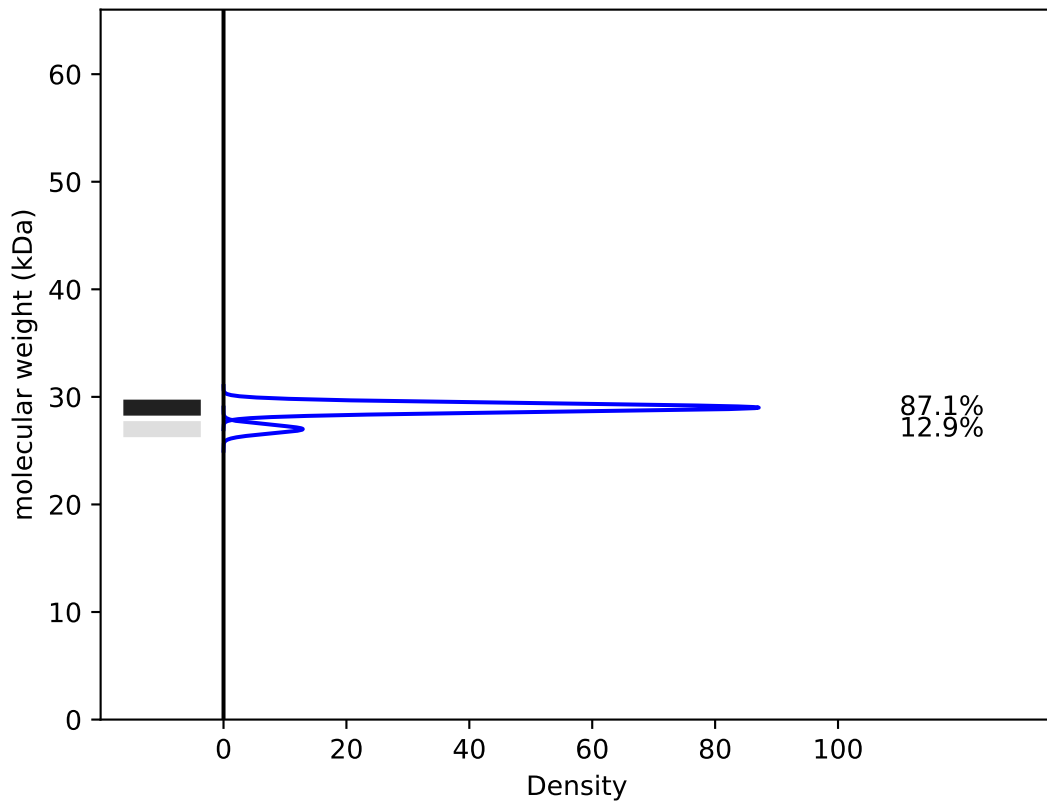



# Q86W42



# Q8IURO

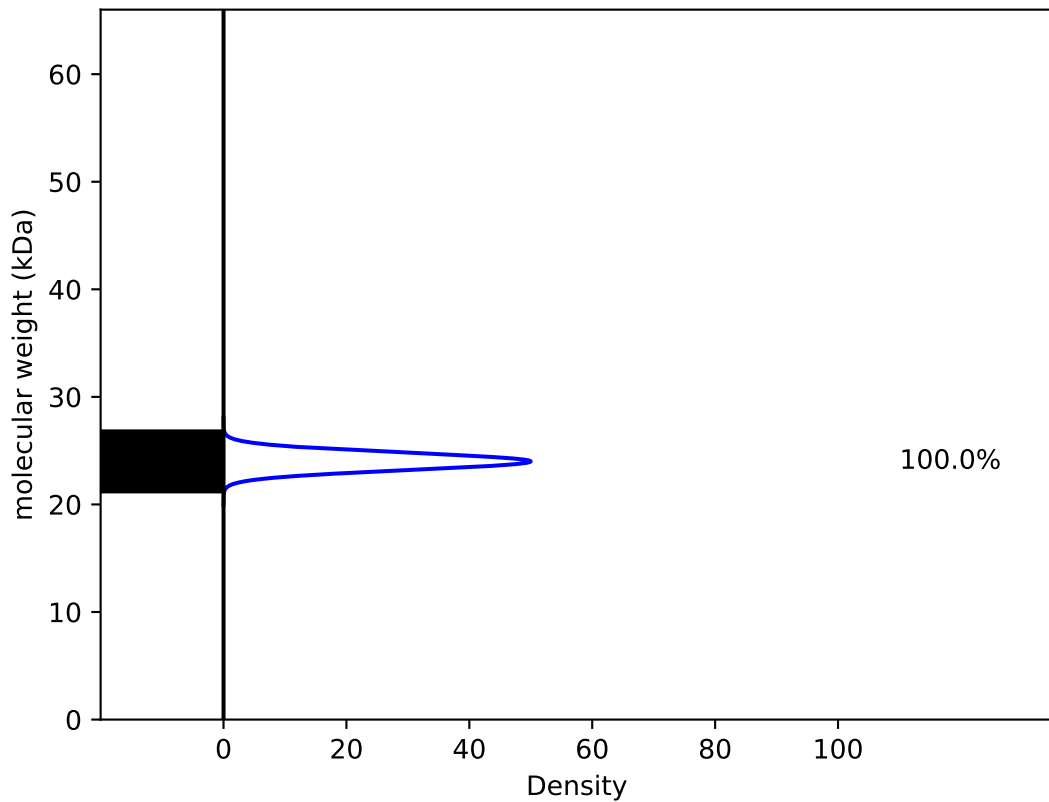

# Q8IV08

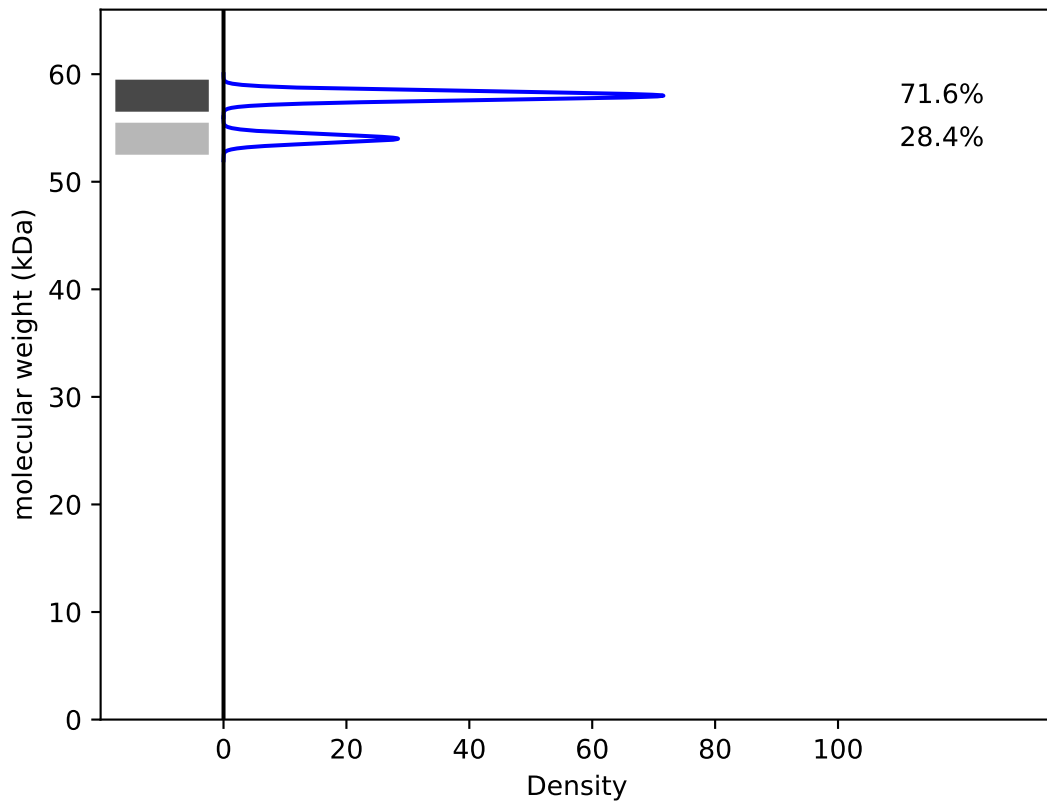

# Q8IWS0

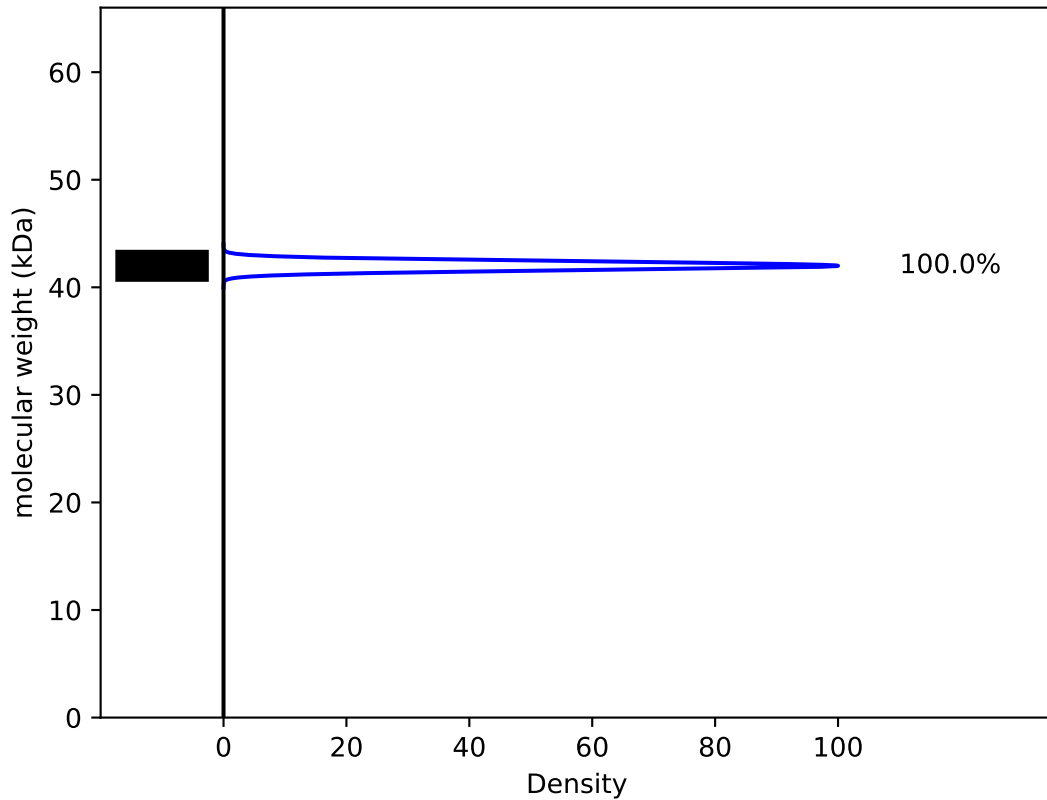

# Q8N183



# Q8N684

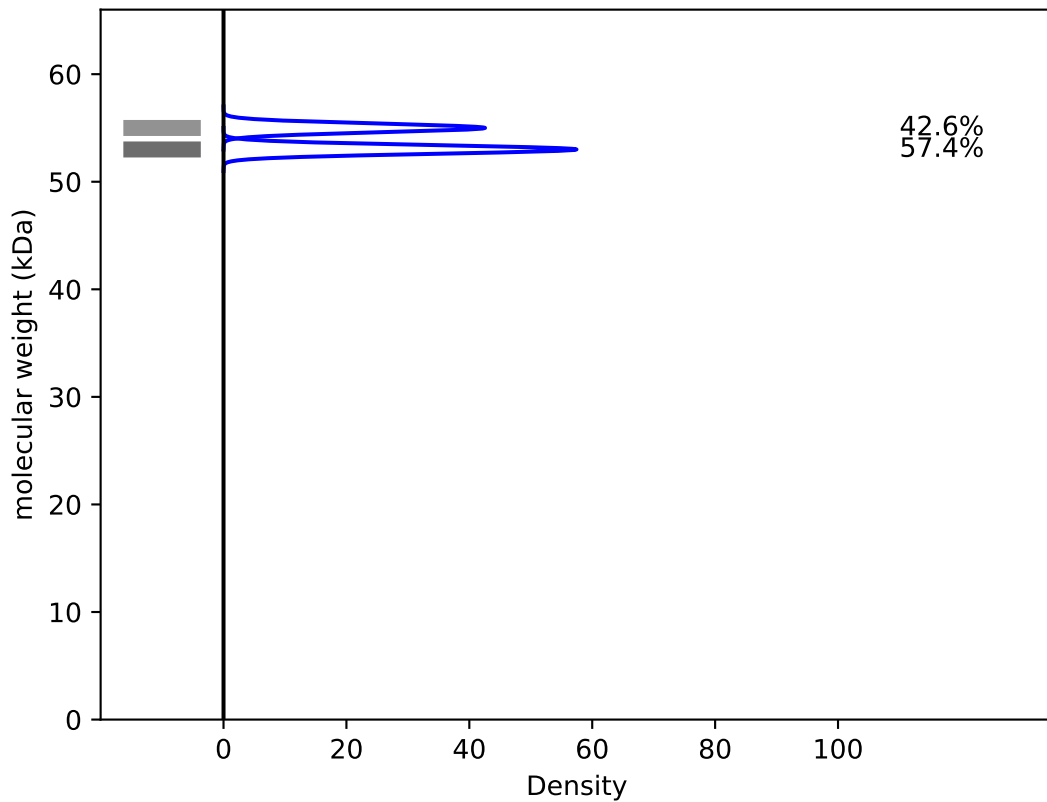

Q8N9N2



# Q8NB16





# Q8NBJ7

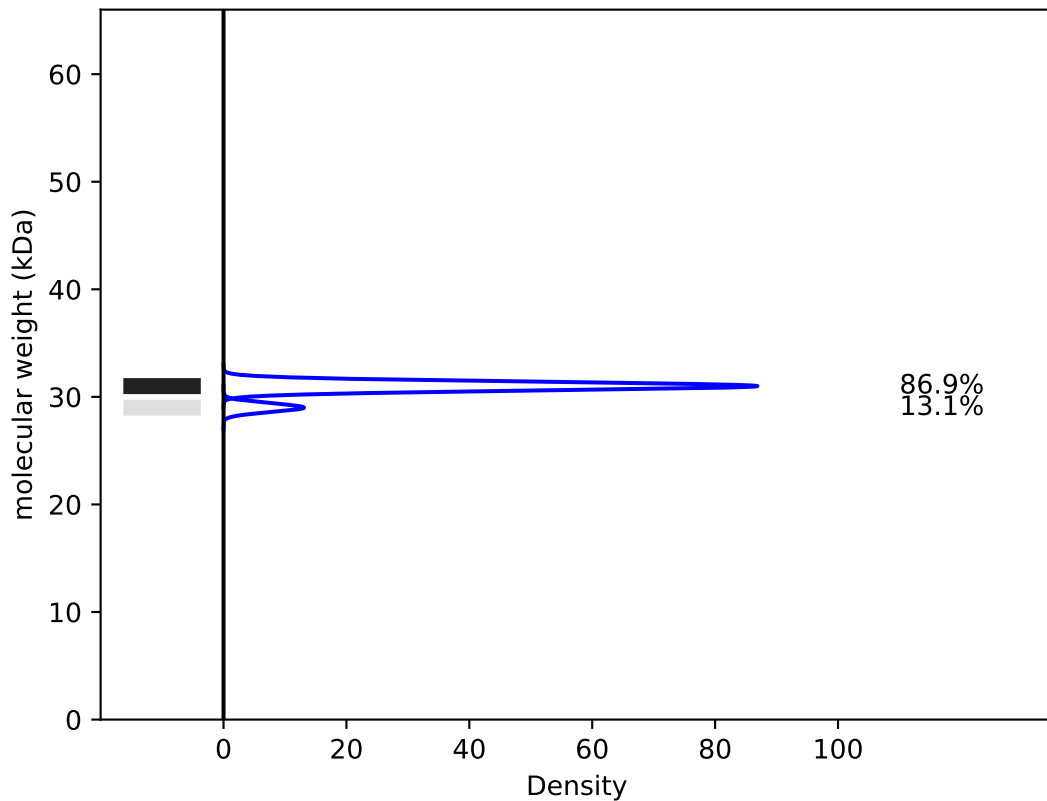

# Q8NBN7

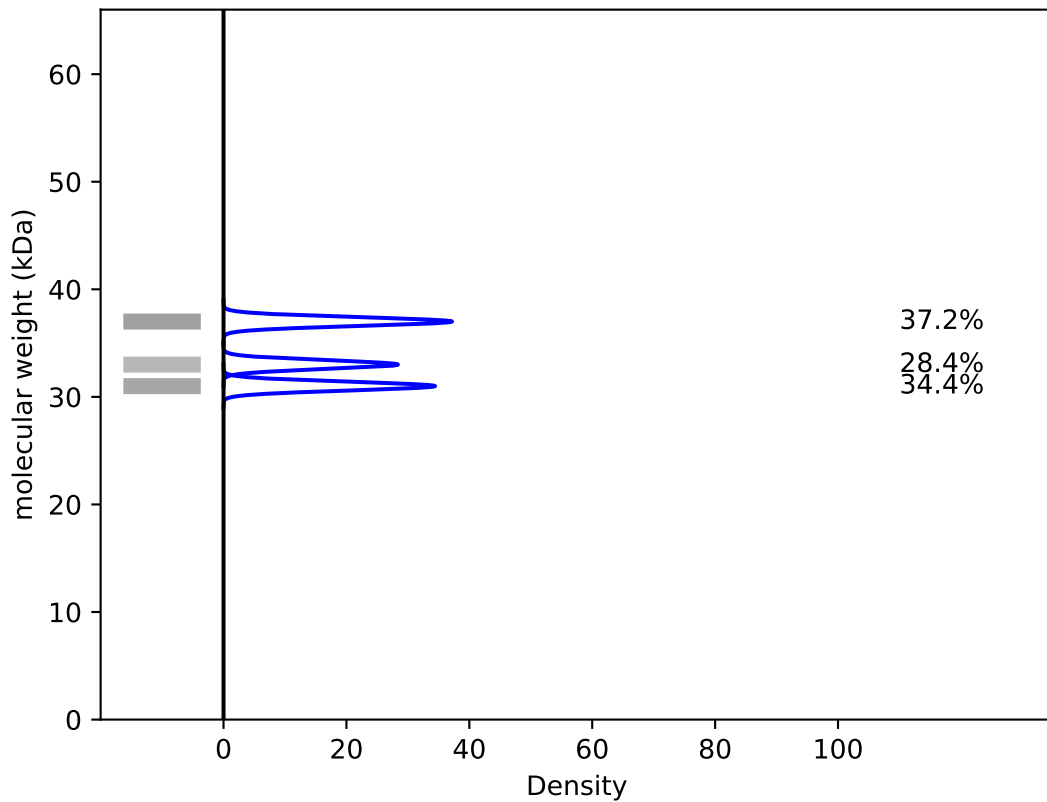

# Q8NBQ5

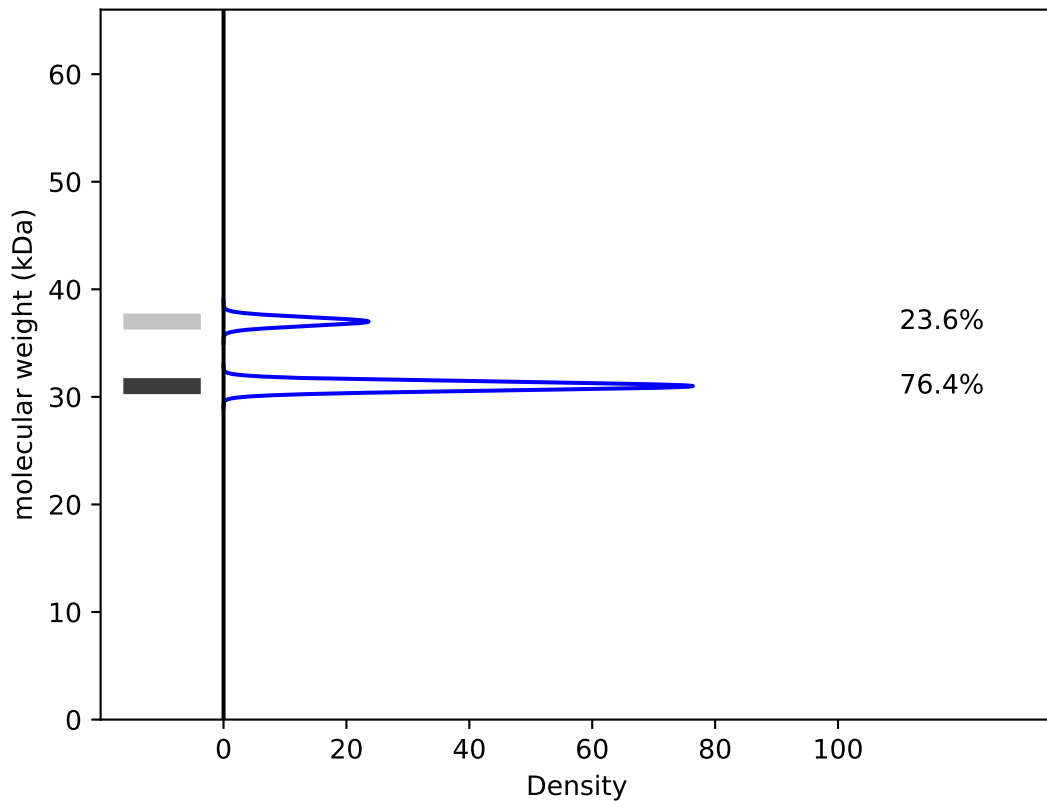

# Q8NBS9

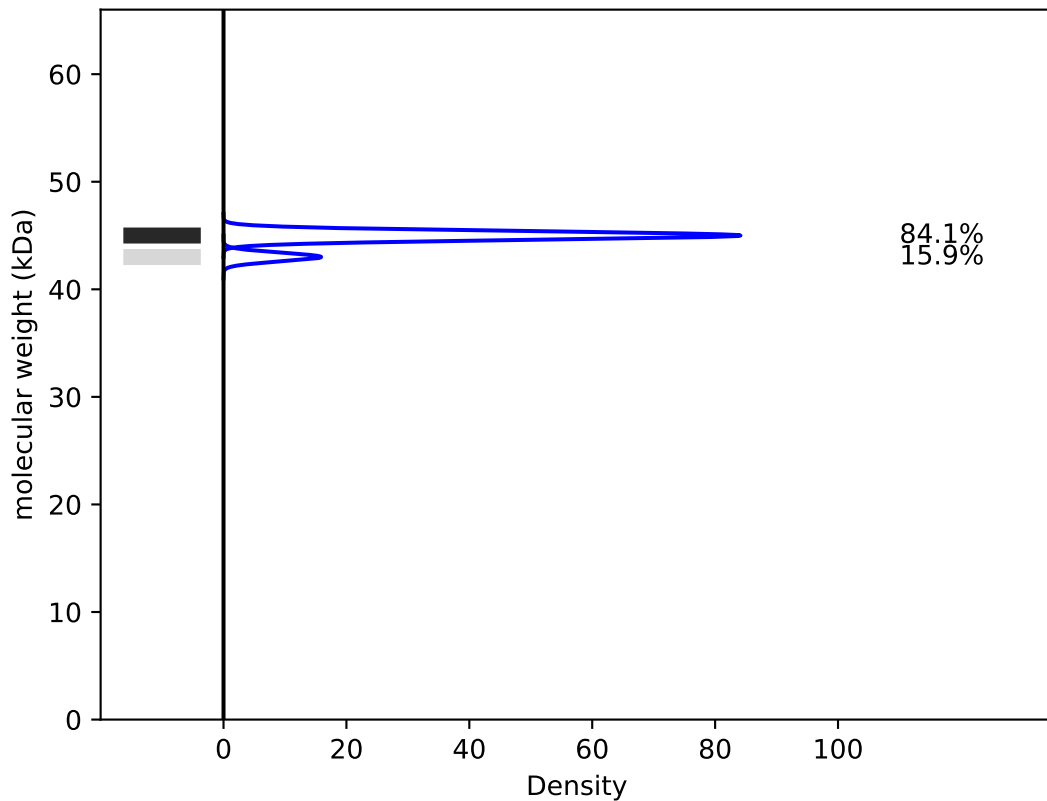

# Q8NBU5



# Q8NBX0

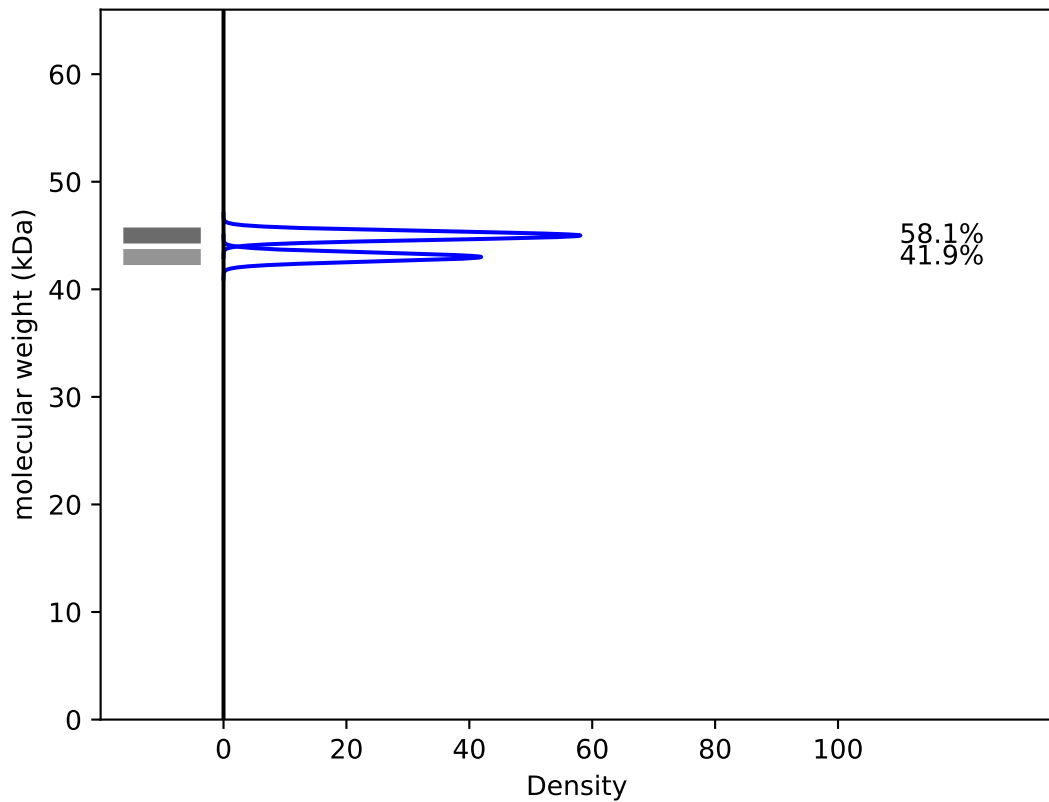

# Q8NC51

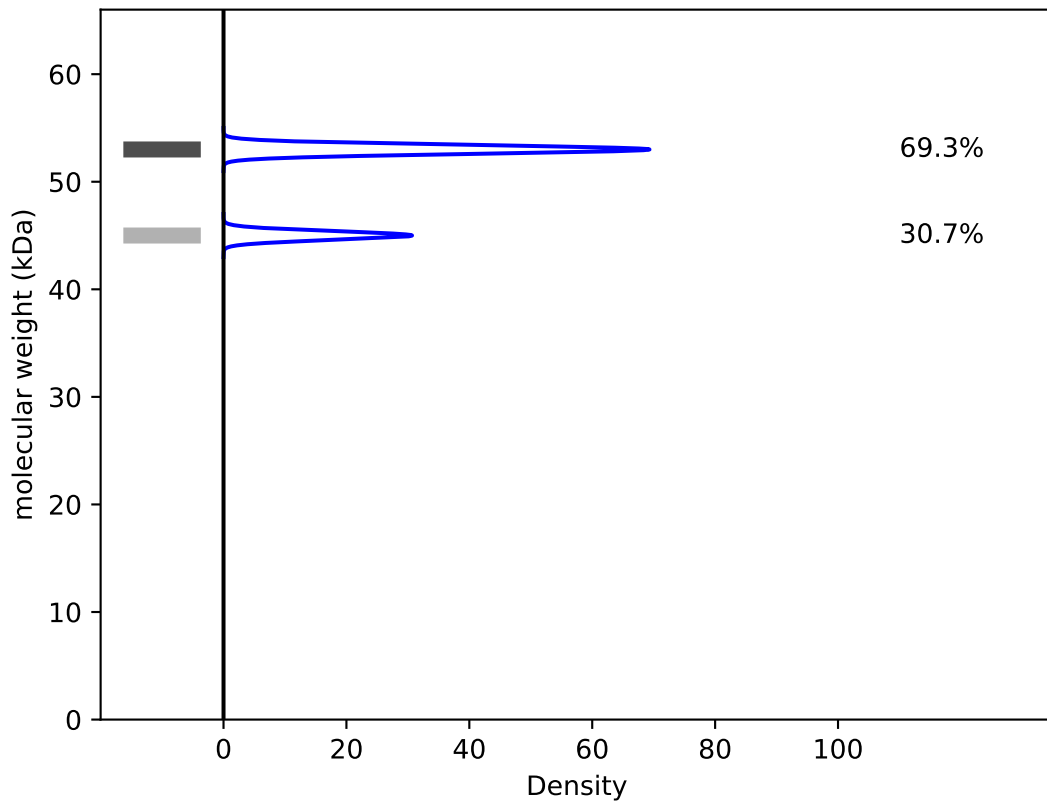

# Q8NCA5

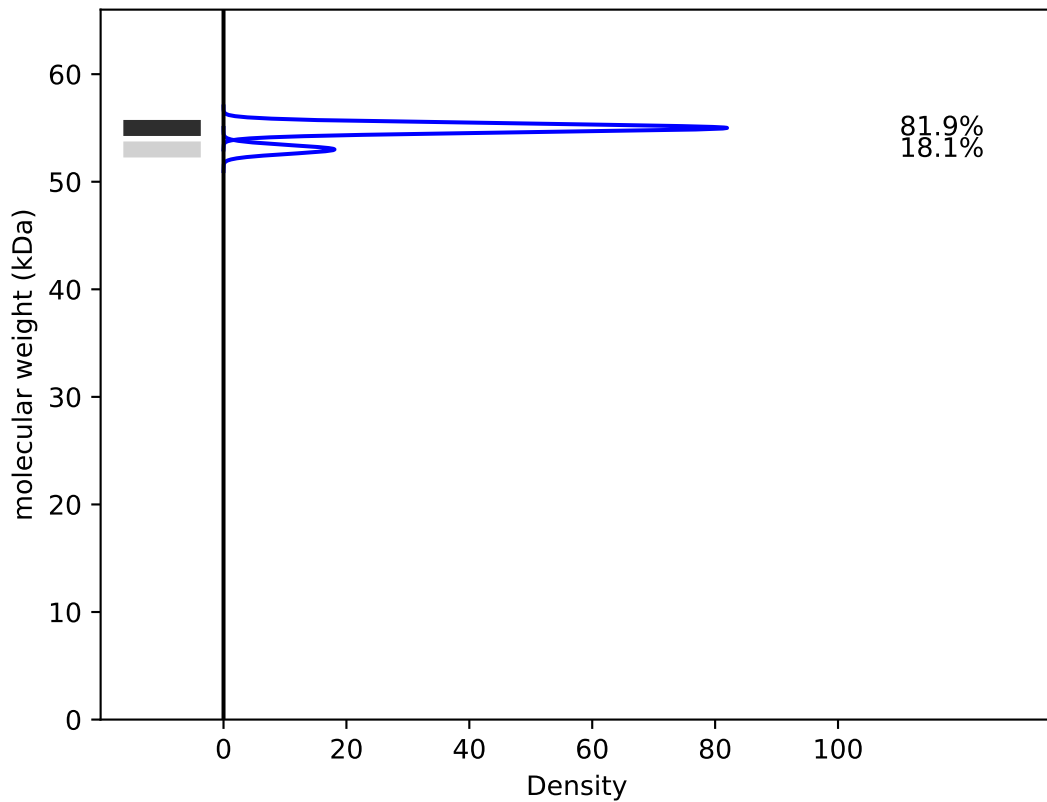



# Q8NE86

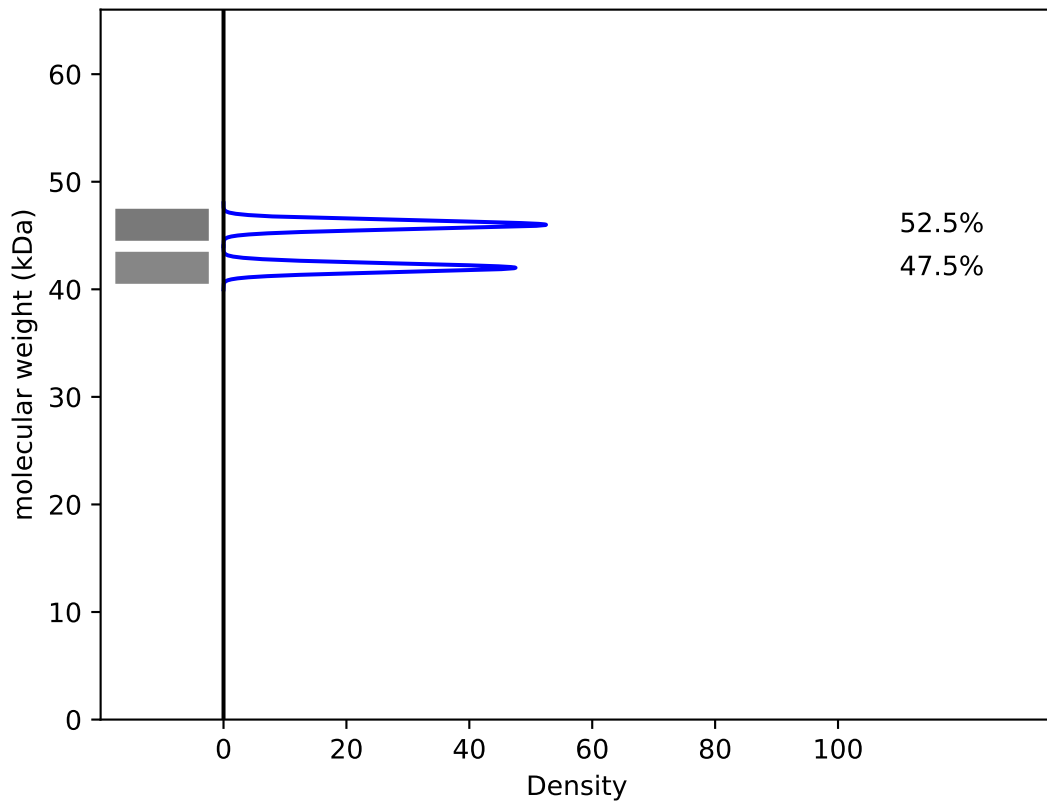

# Q8NEJ9



# Q8NEZ5

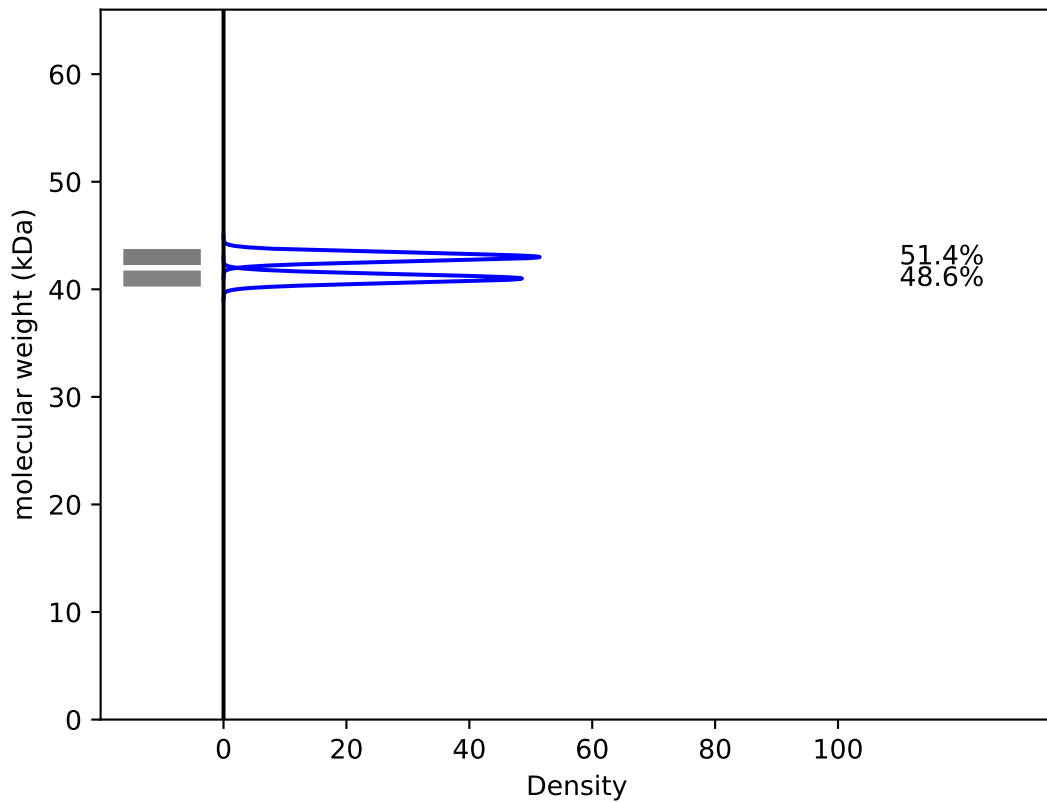

# Q8NF37

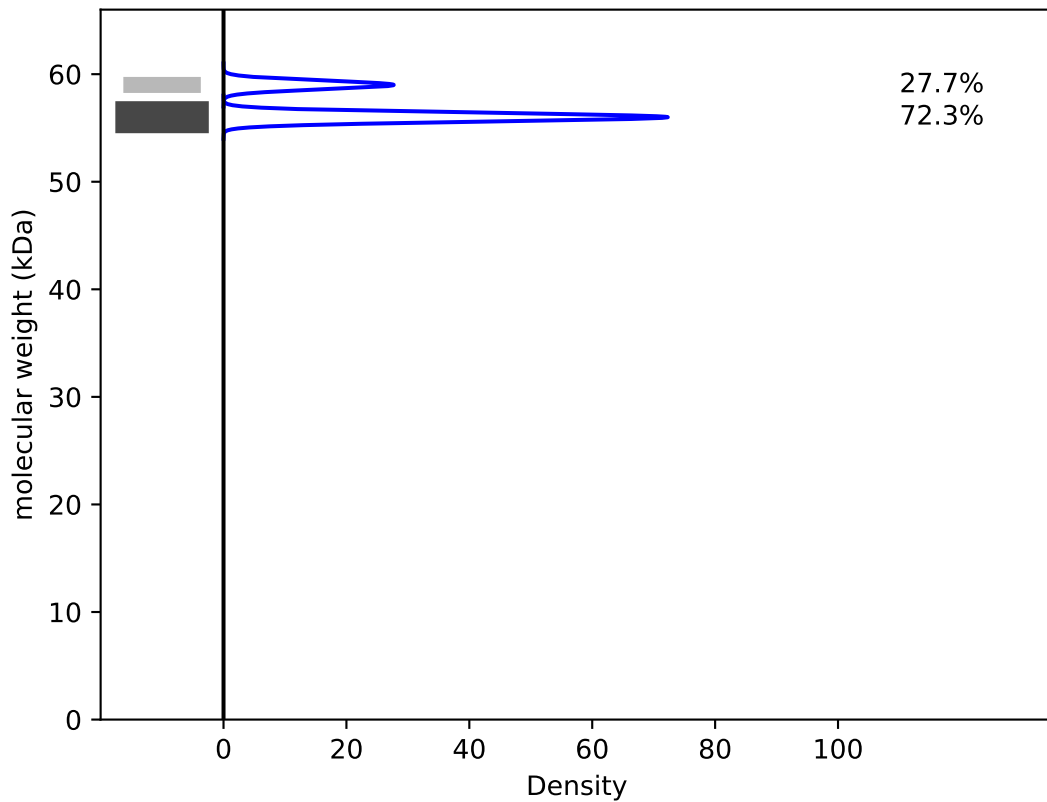

# Q8NFH3

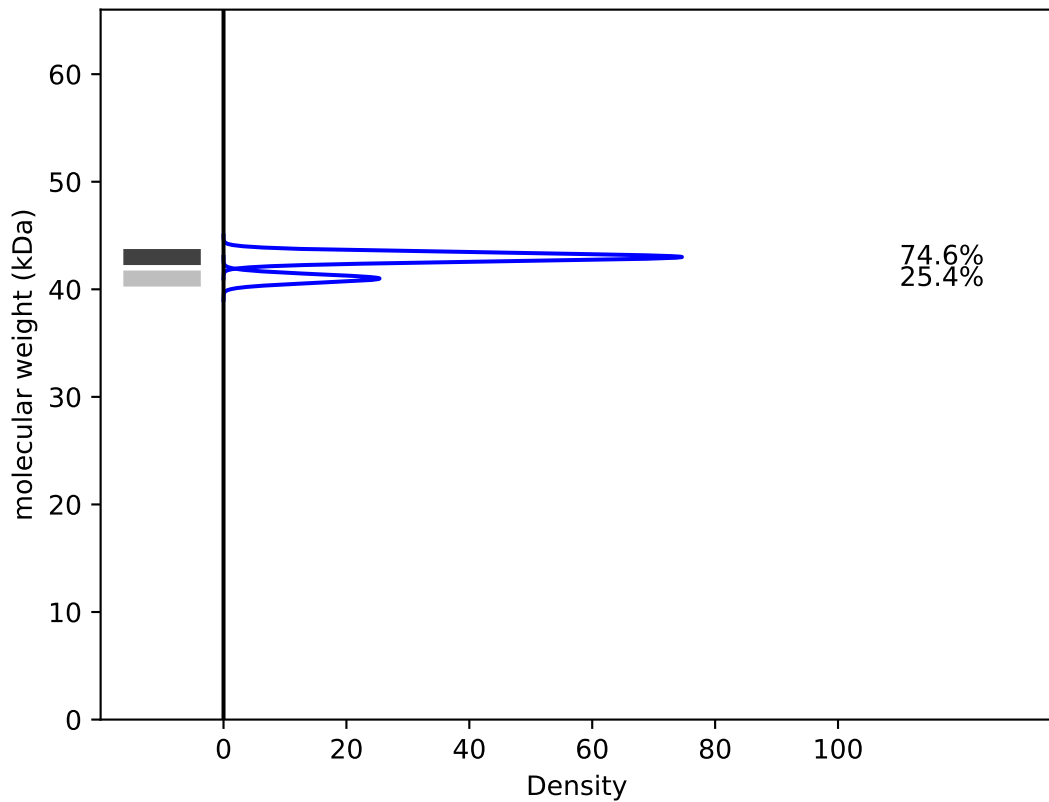

# Q8NFH4

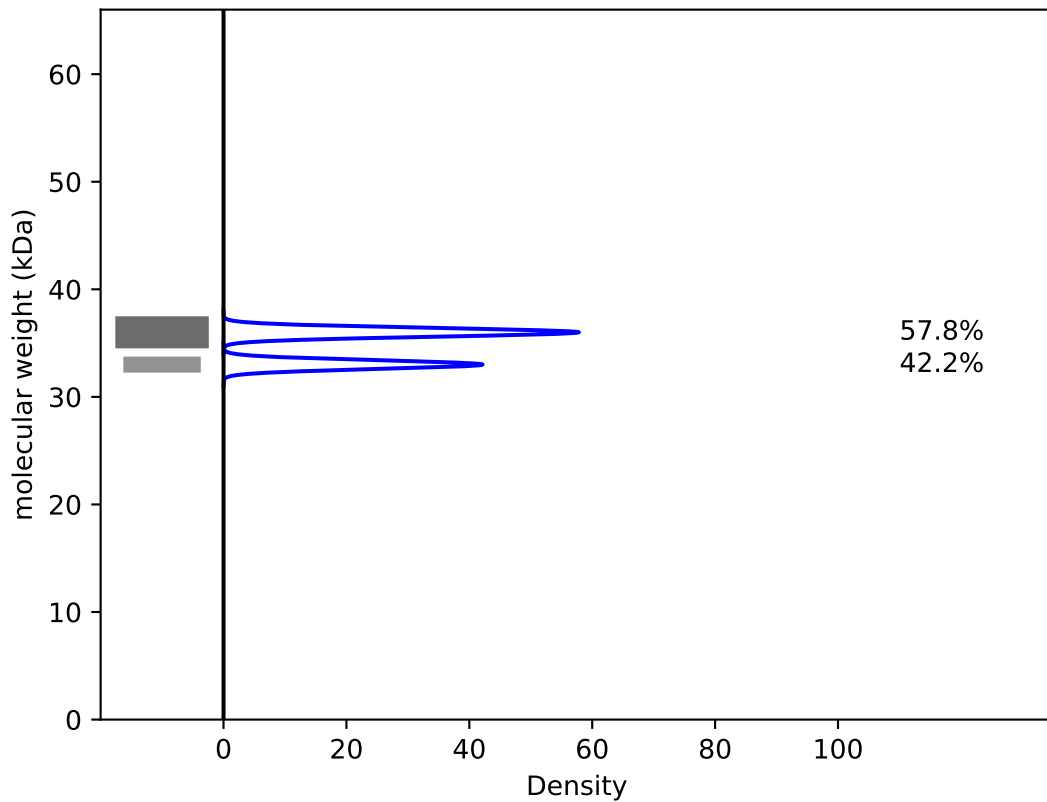

# Q8NFH5



# Q8TBC4





# Q8TC12

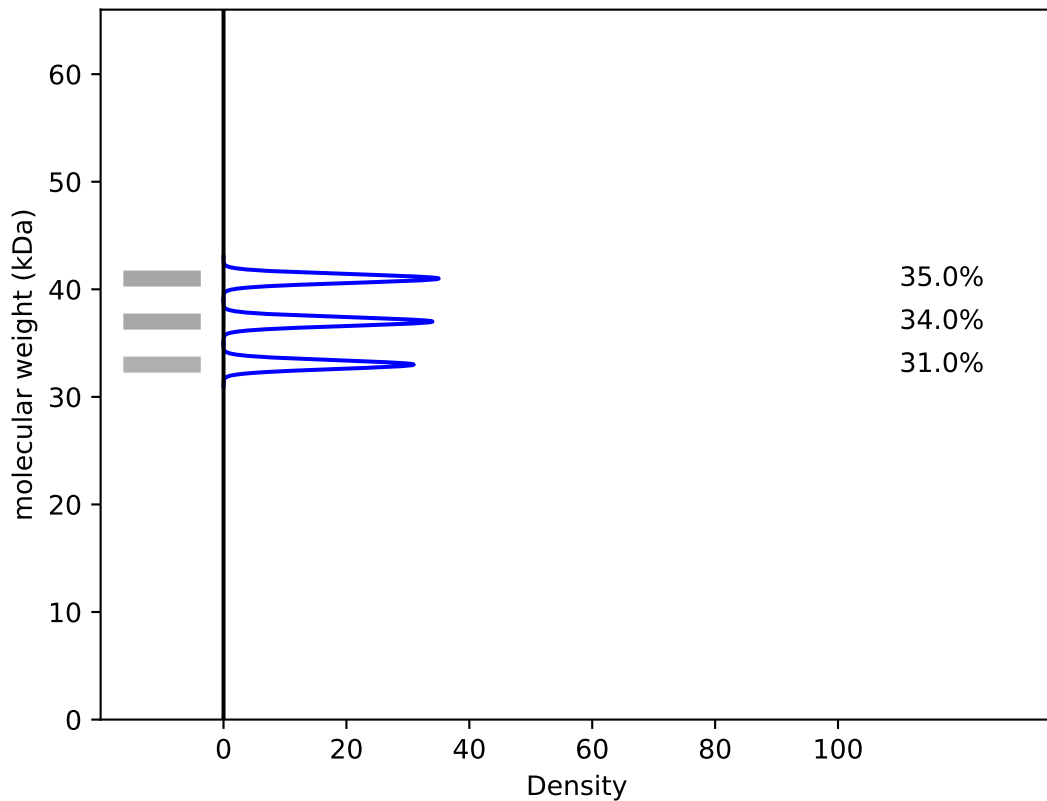

# Q8TDN6

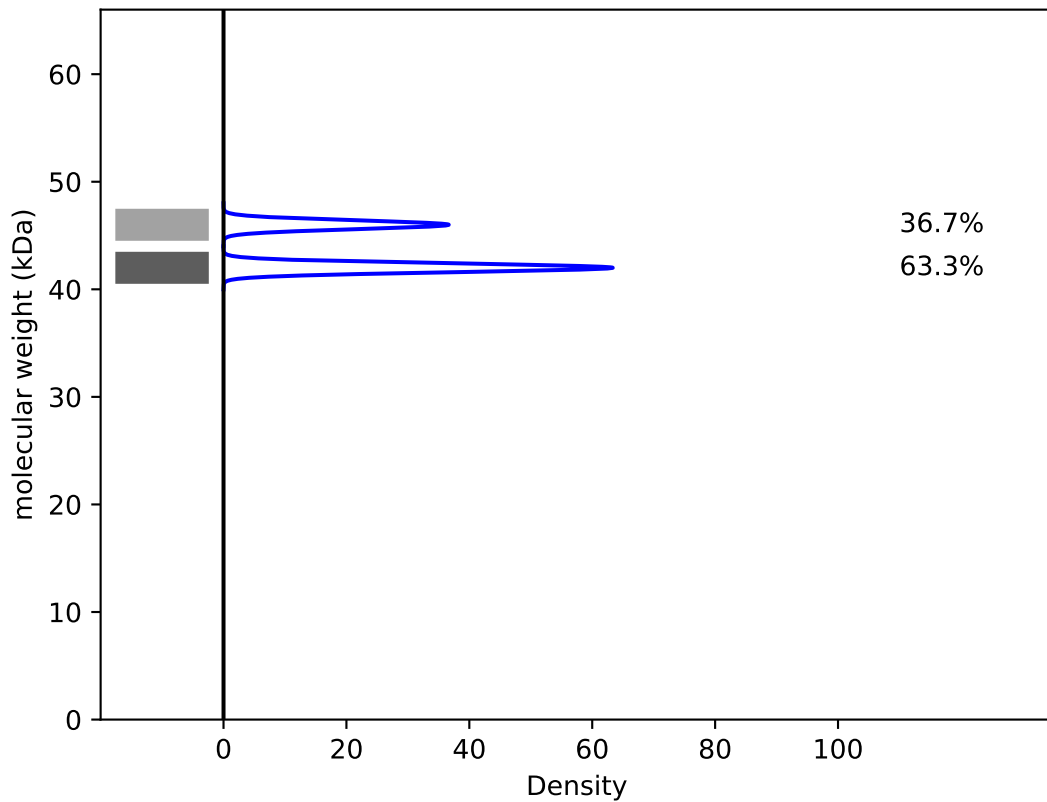

# Q8TDP1



# Q8TED1

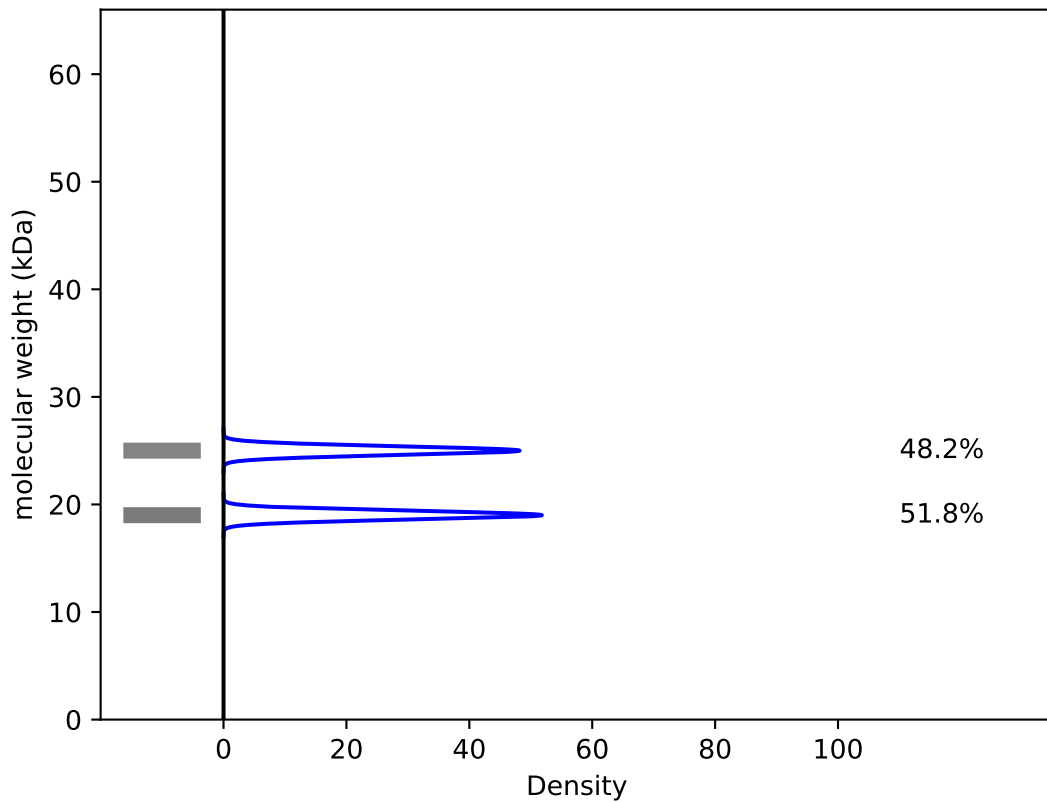

# Q8WUK0

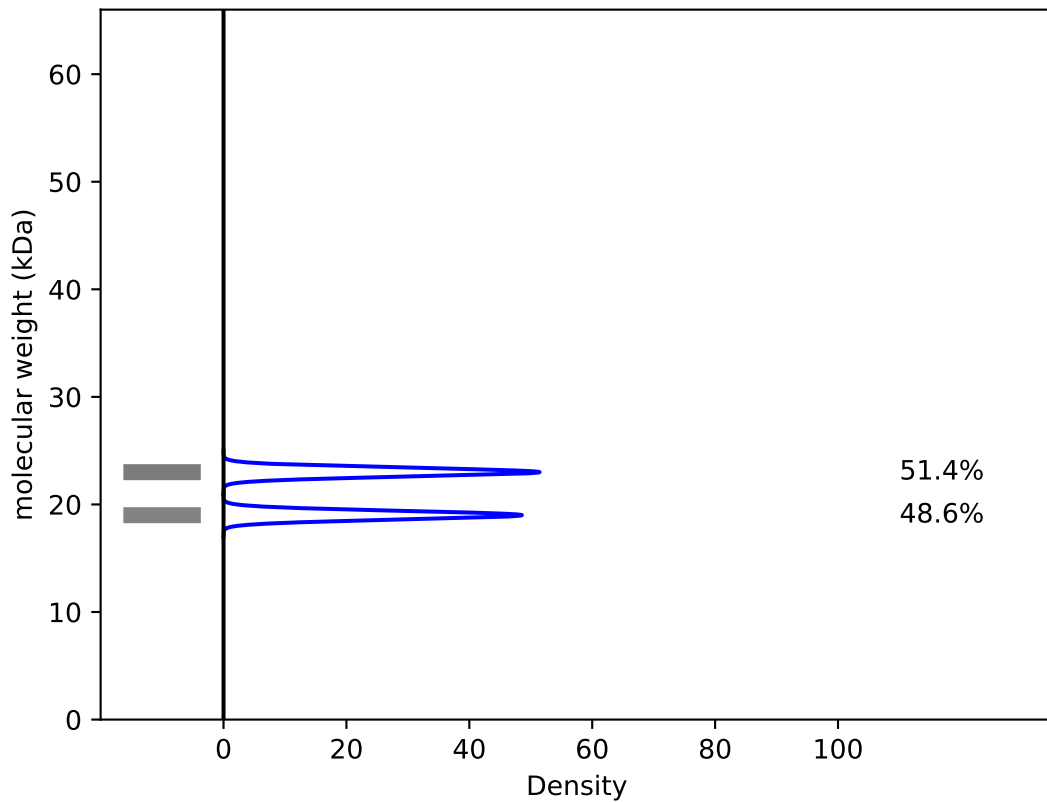

# Q8WUY1

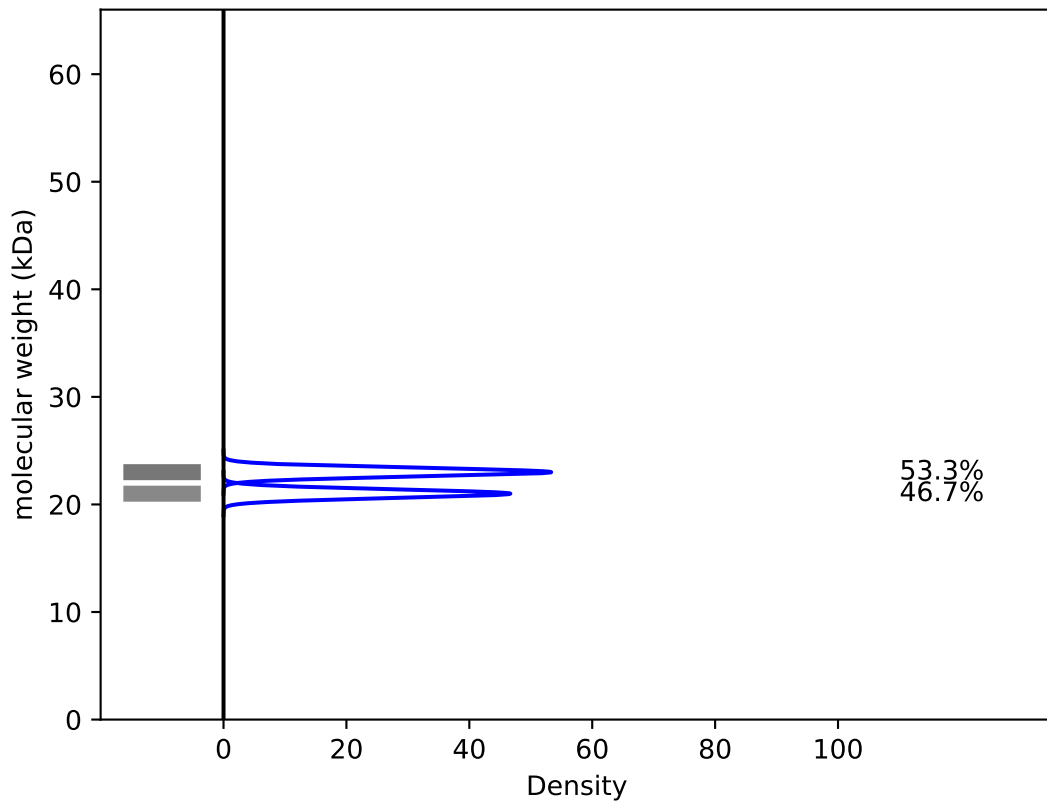

# Q8WVM0

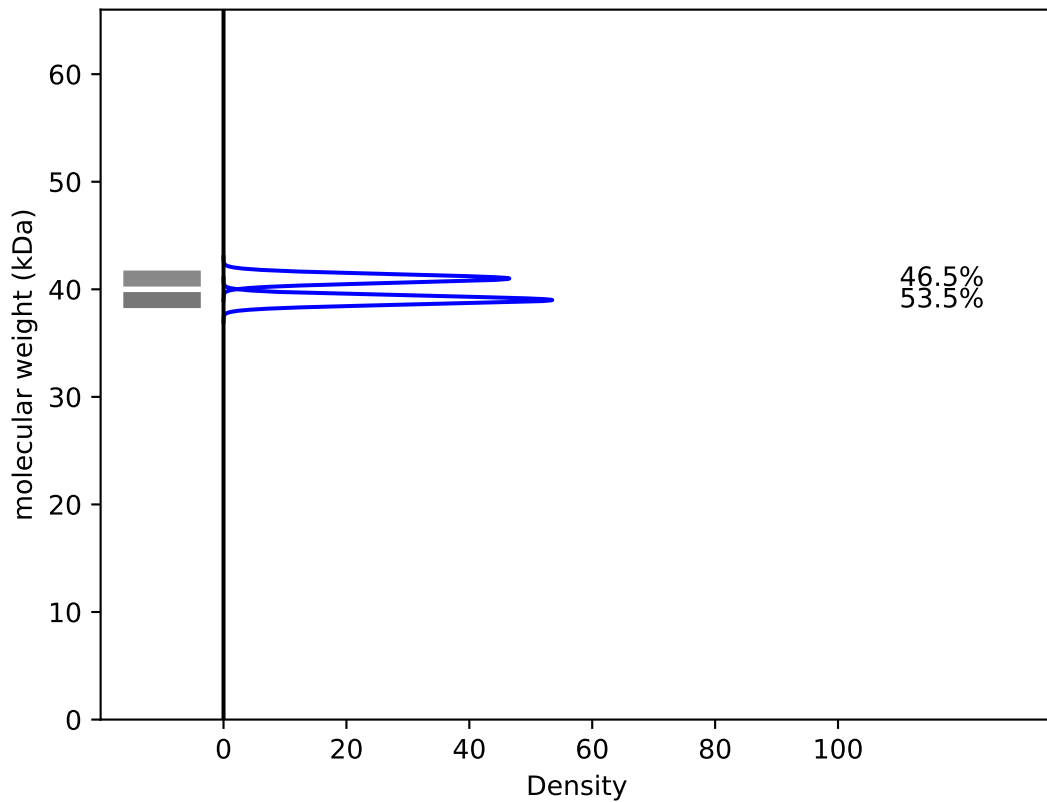

# Q8WVX9

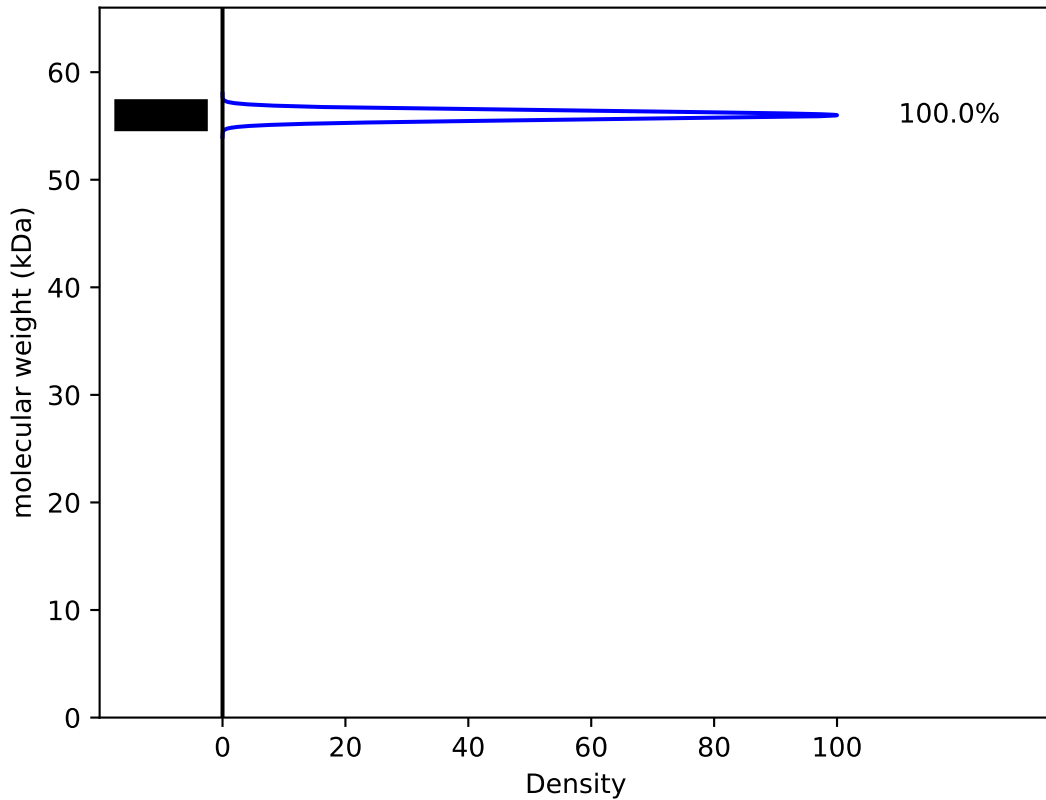



# Q8WW12



# Q8WW59



# Q8WWH5

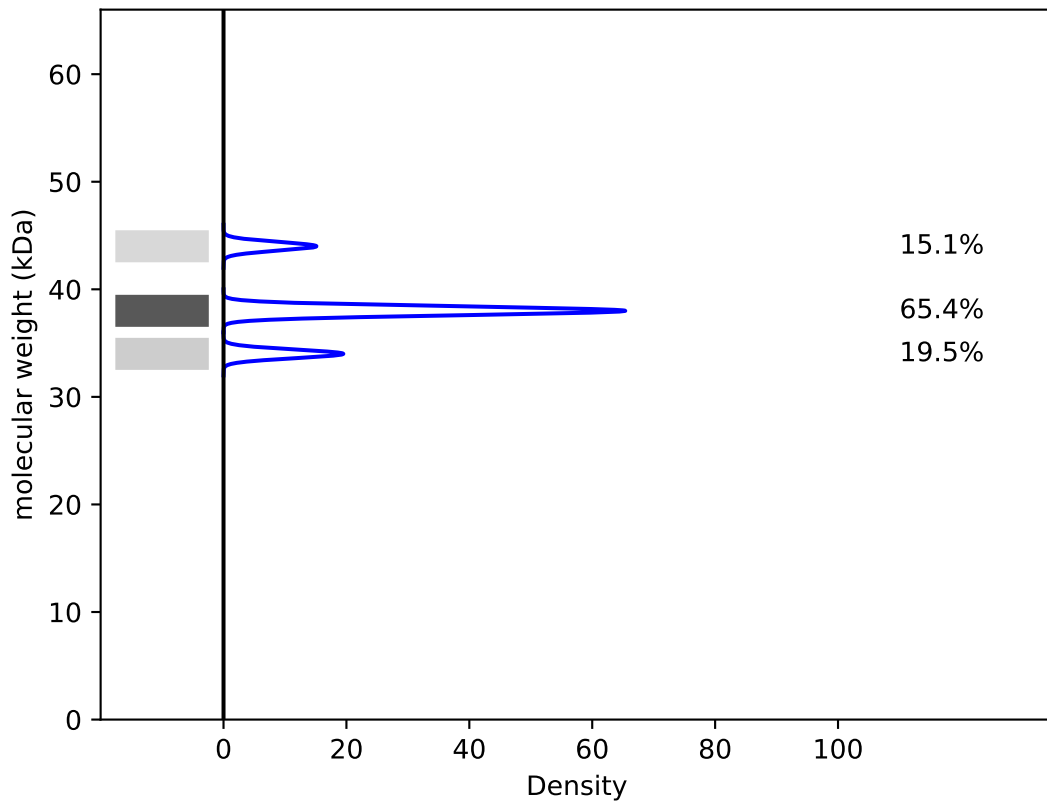

# Q8WWY3

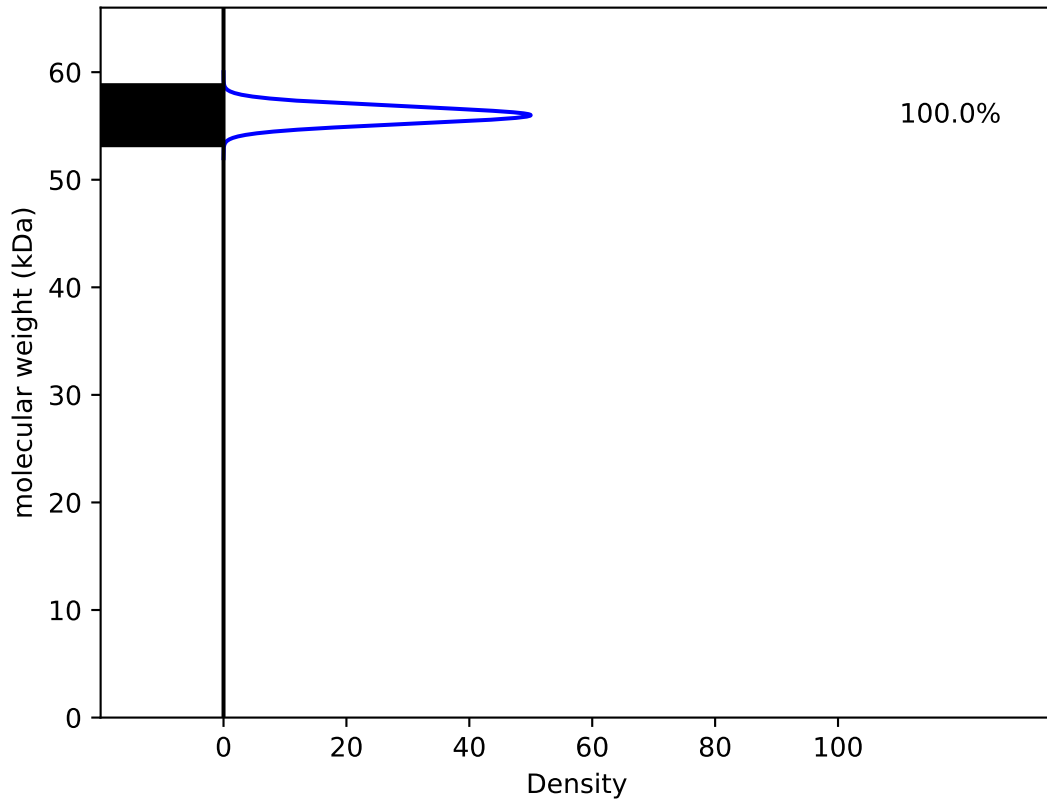

# Q8WXF1



Q92522

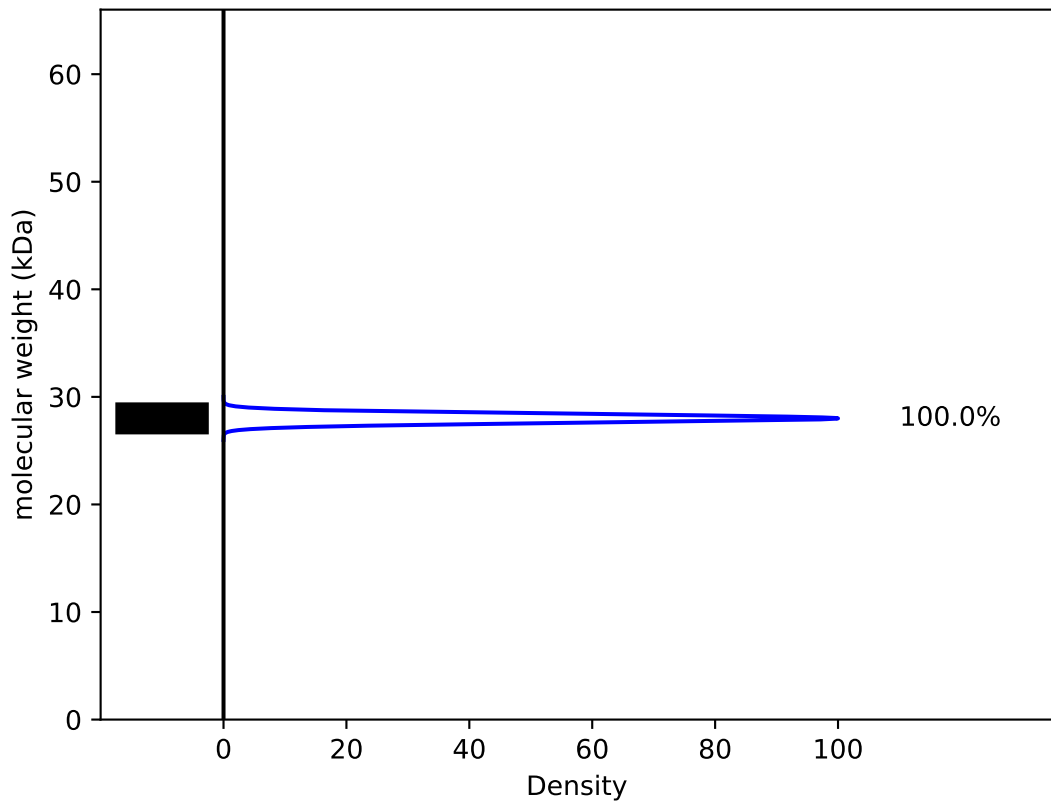

# Q92552

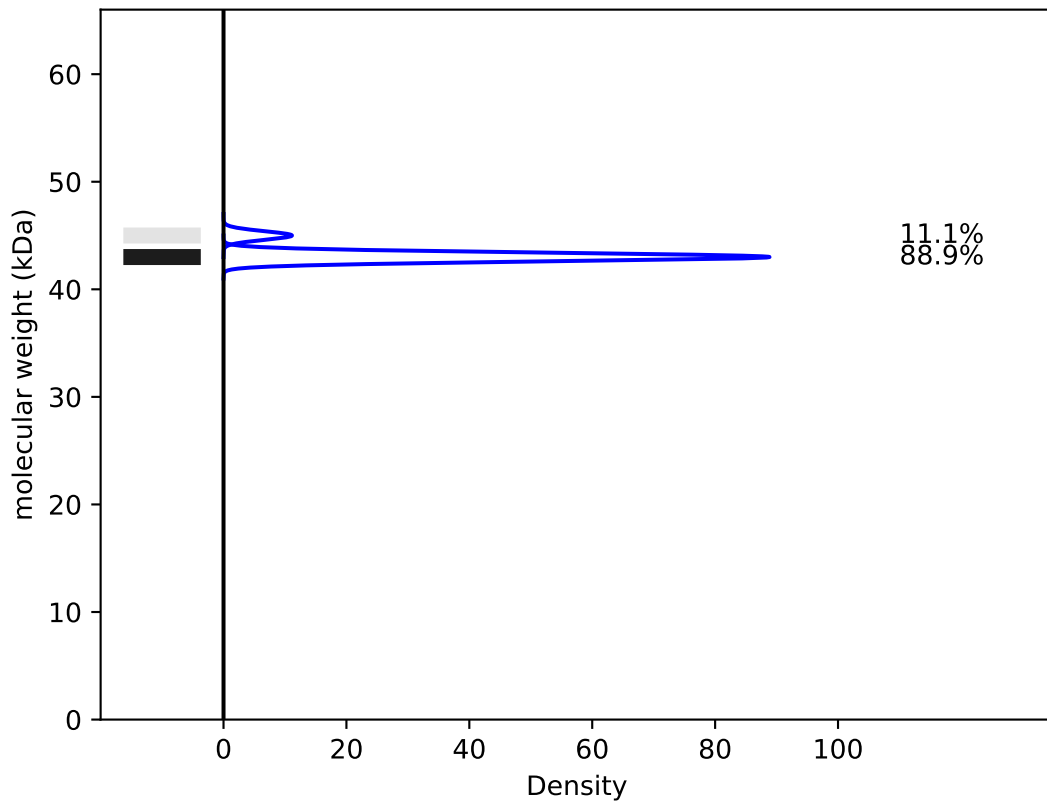

# Q92597

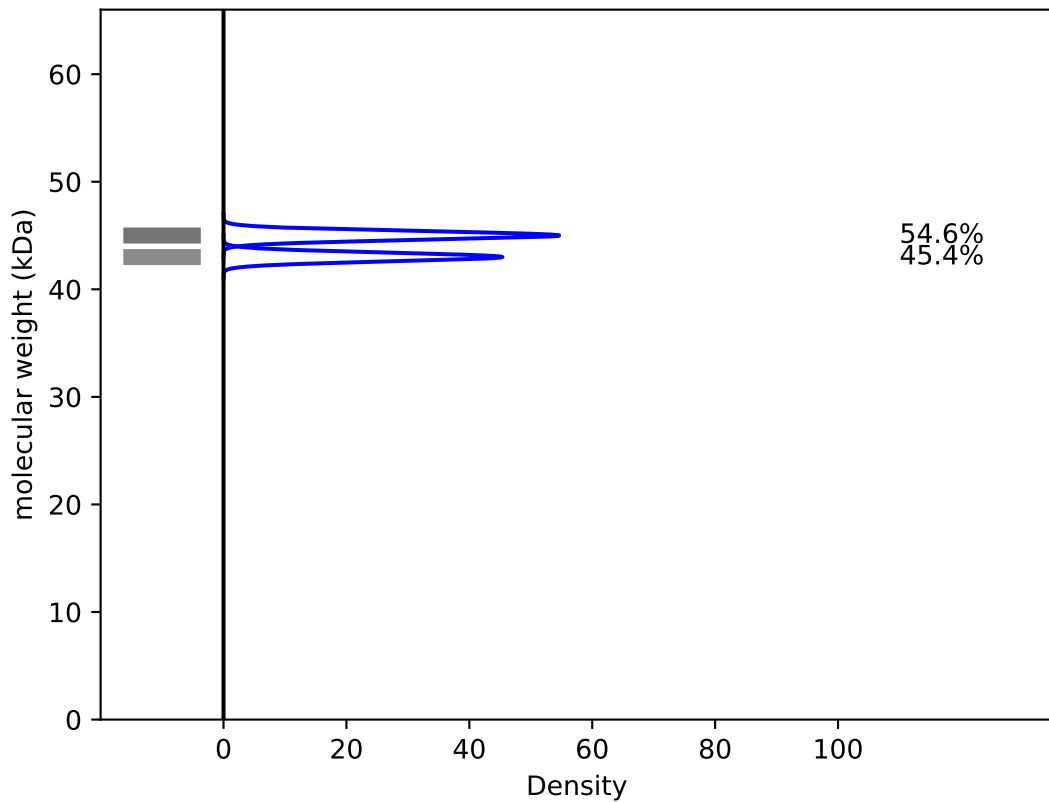



Q92688



Q92747



# Q92769

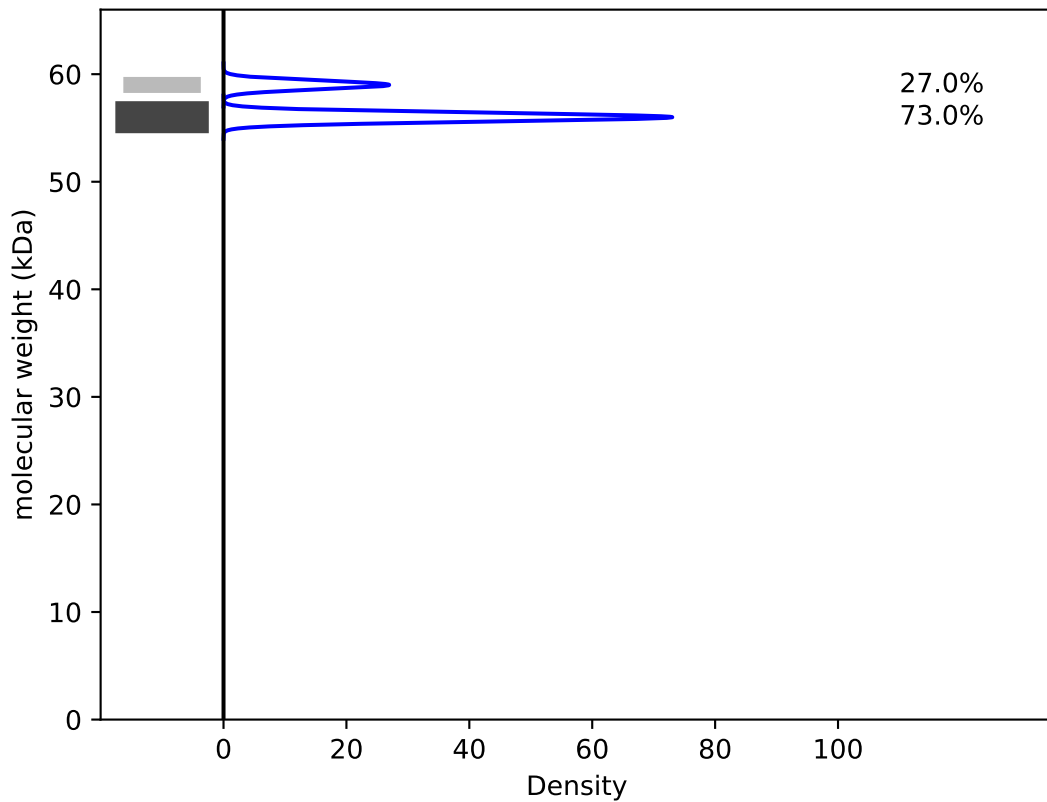

# Q92820

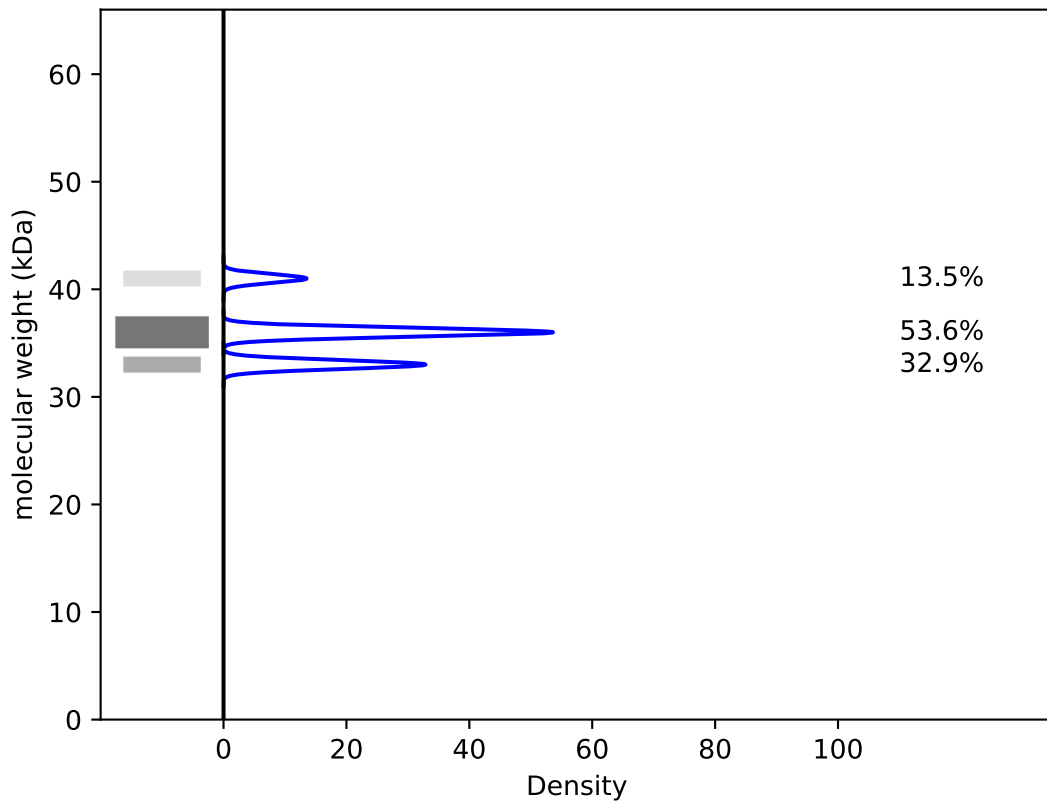

Q92879



O95319



Q92882

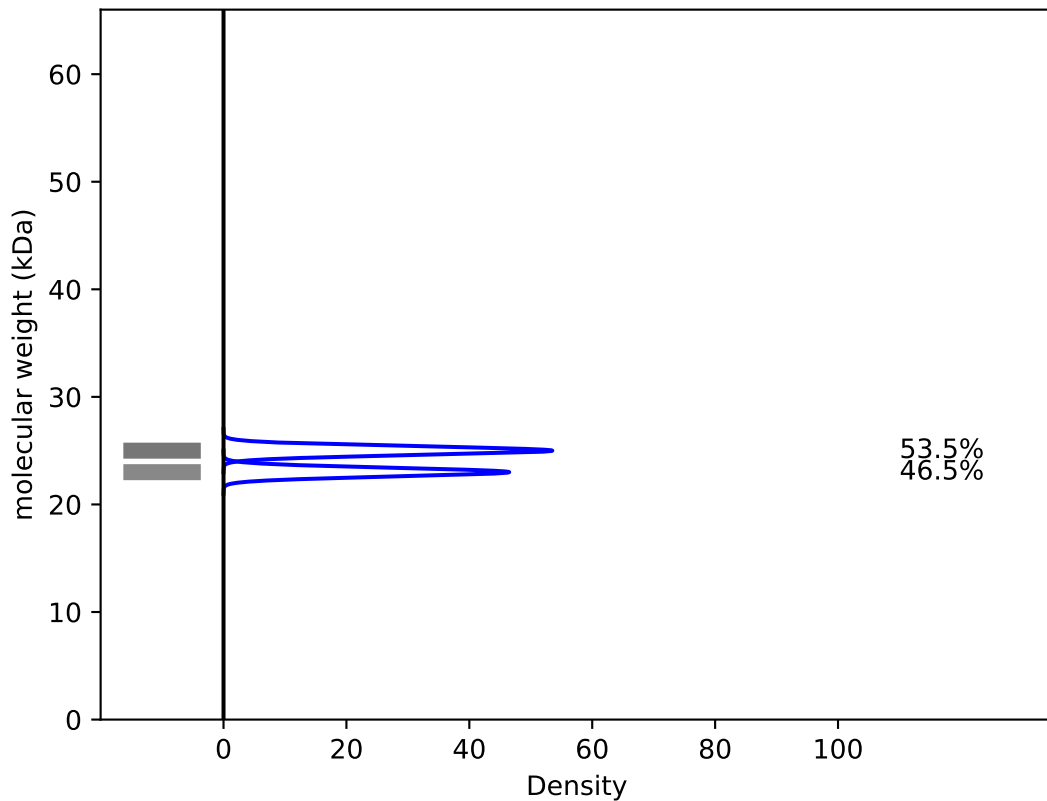

# Q92890

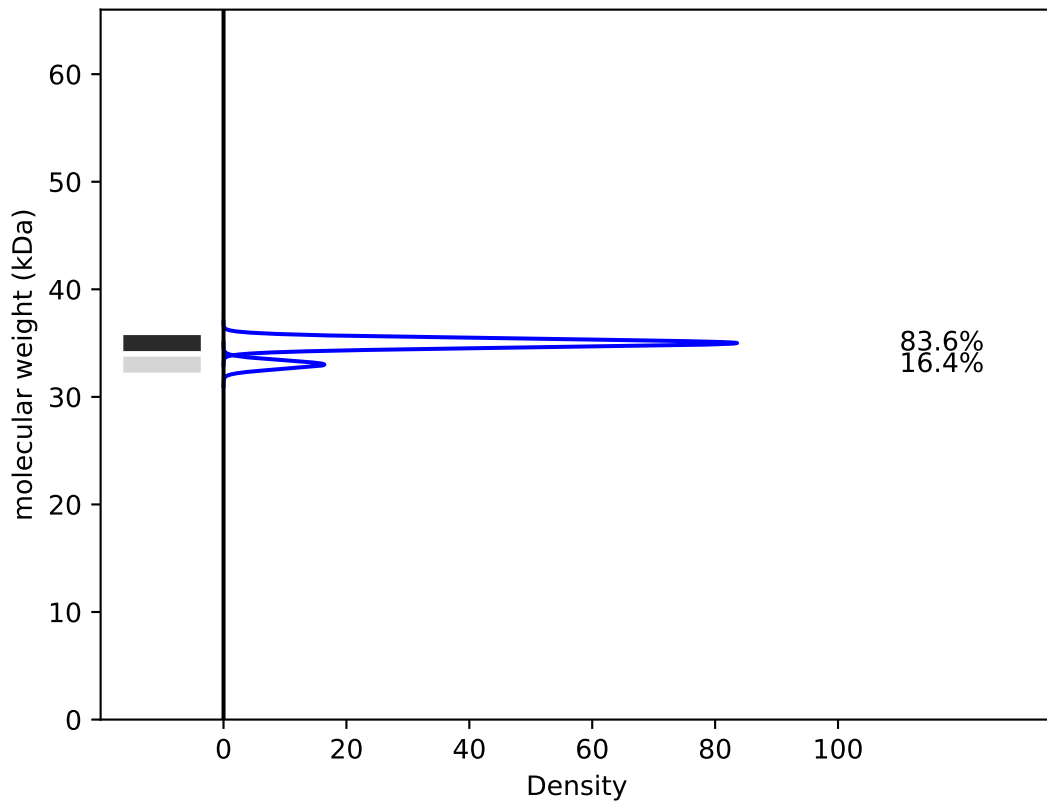



# Q92905

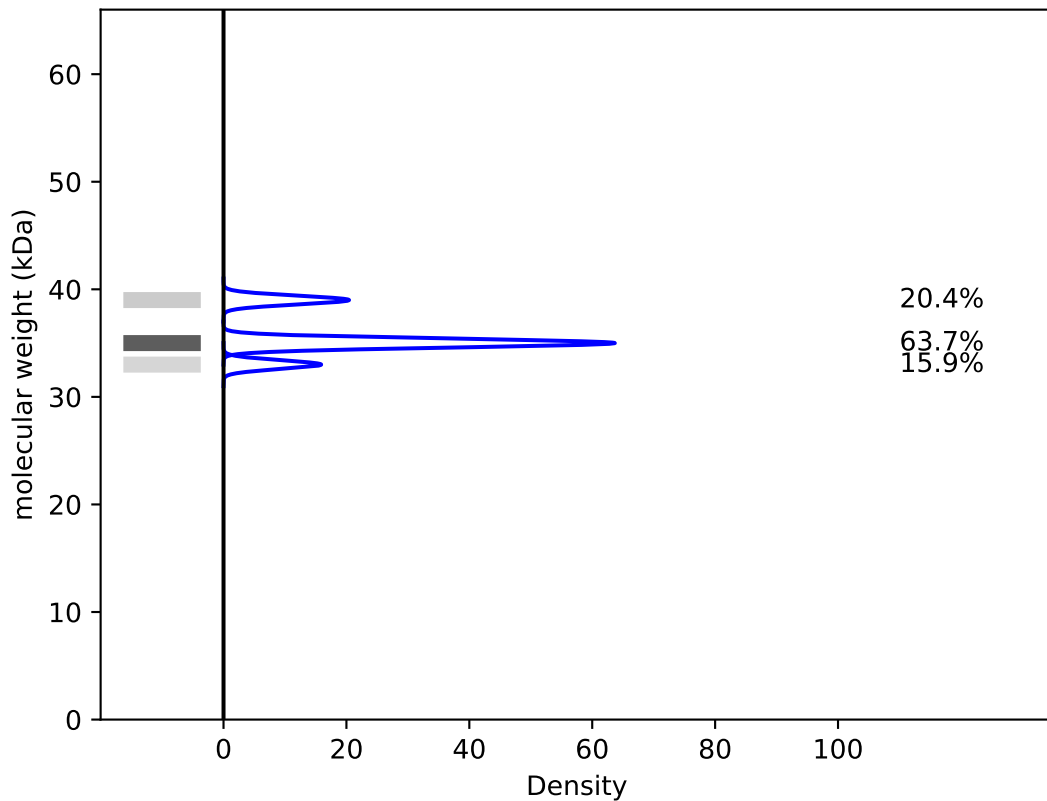

Q92917



Q92947



# Q92979



# Q93096

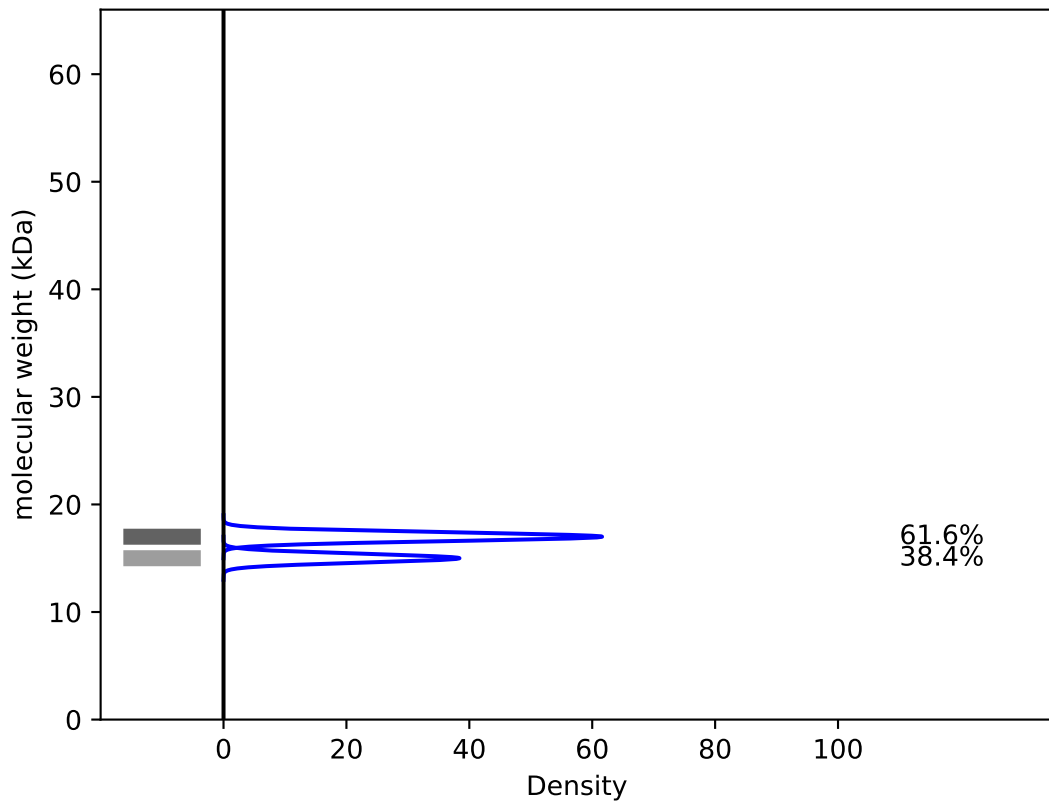

# Q969U7

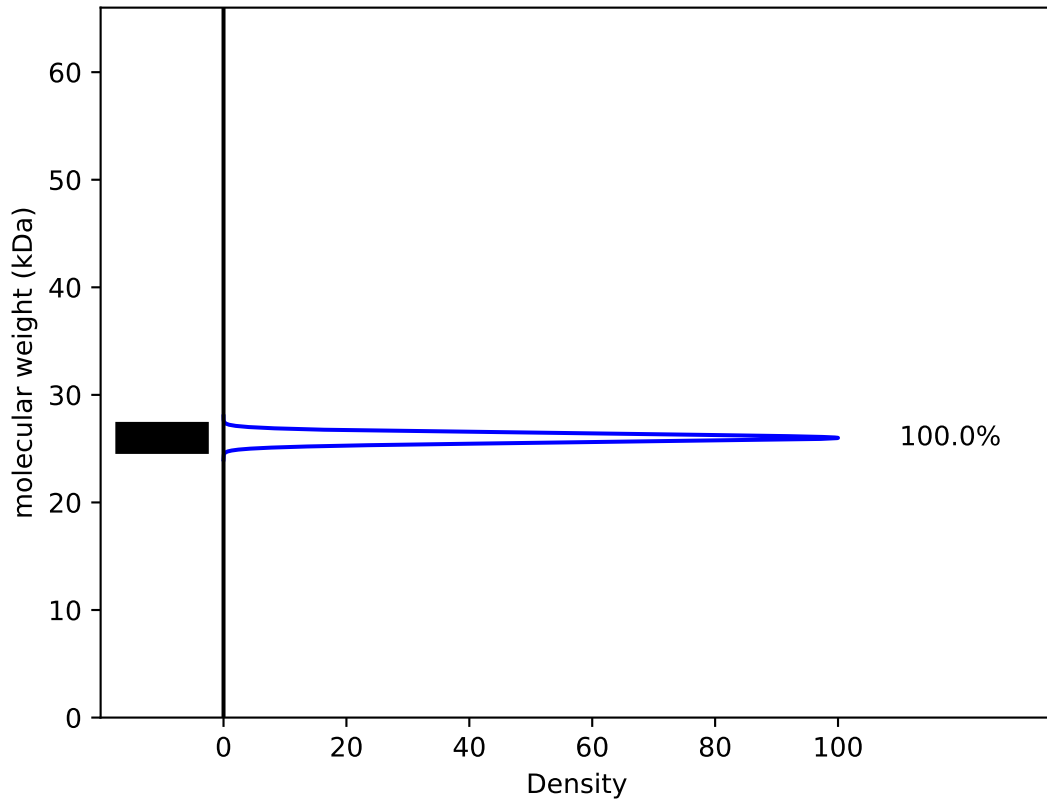

# Q969X5

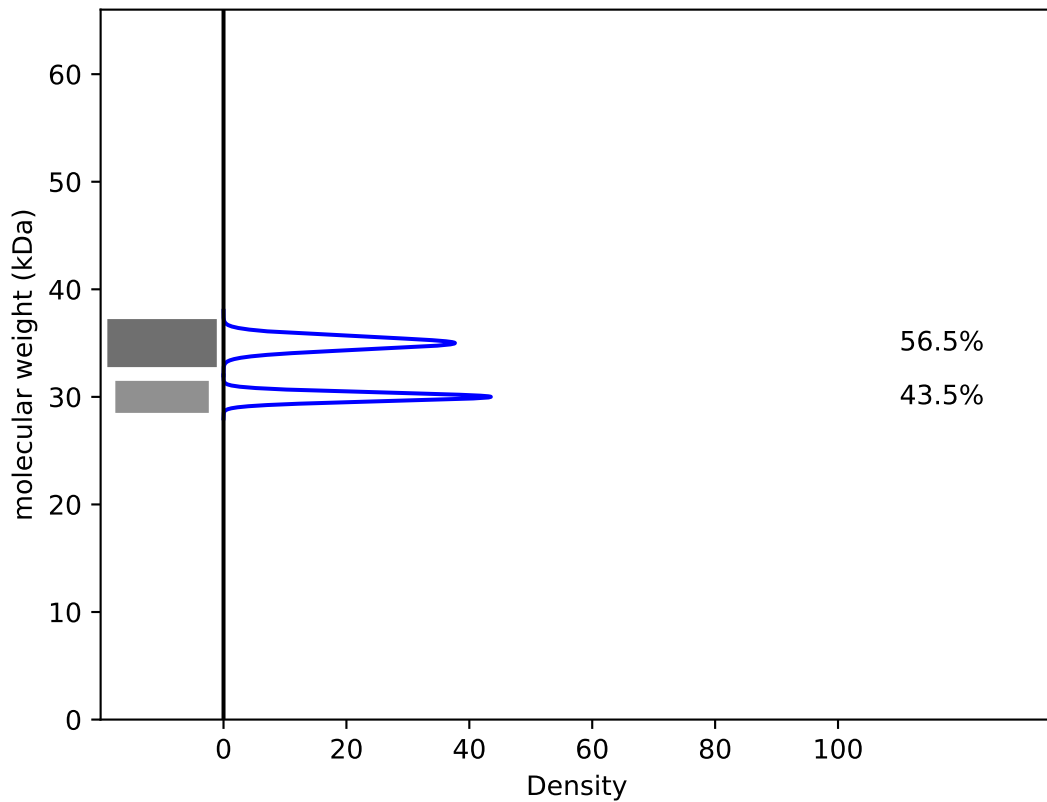

# Q96A33

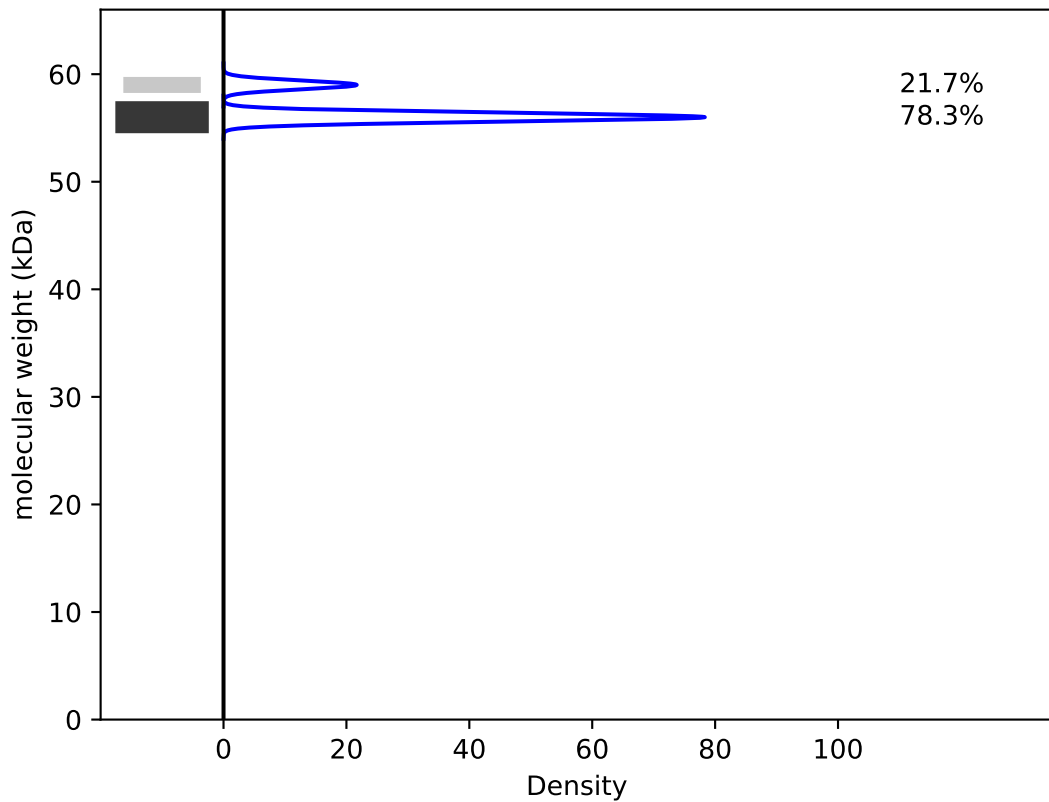



# Q96A35



# Q96AG4



# Q96C19



# Q9BUP0



# Q96C23

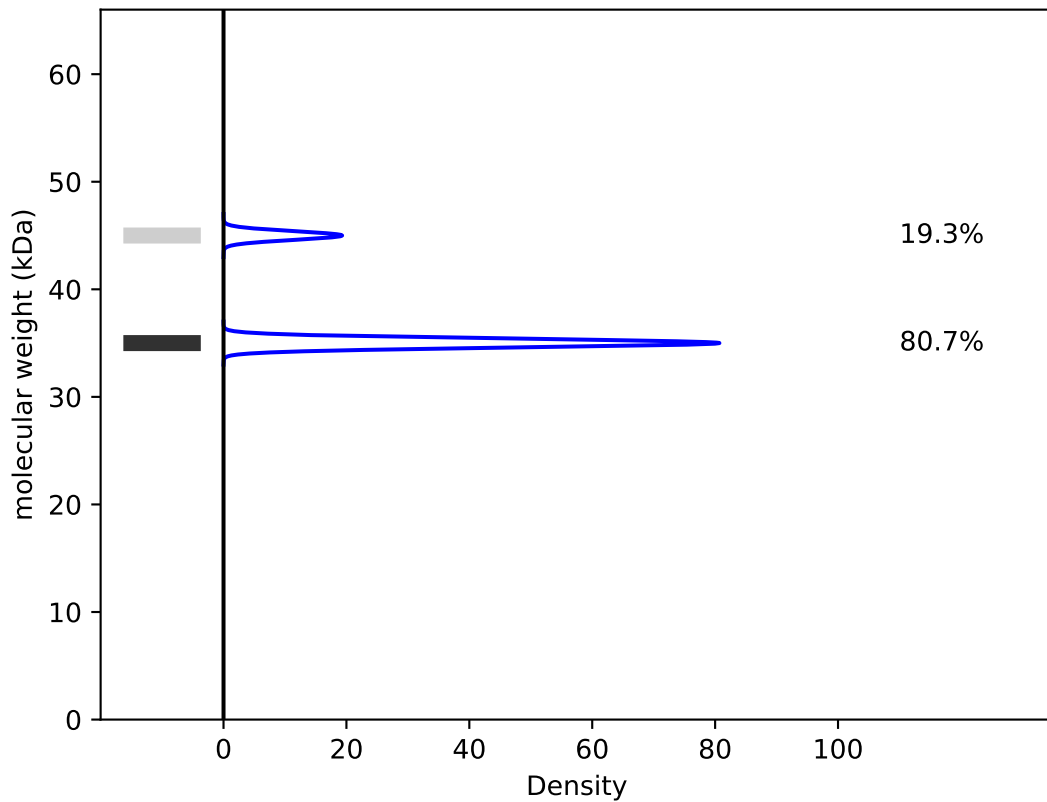

# Q96C36



# Q96C86



# Q96CS3





# Q96CW1



# Q96D46



# Q96DG6

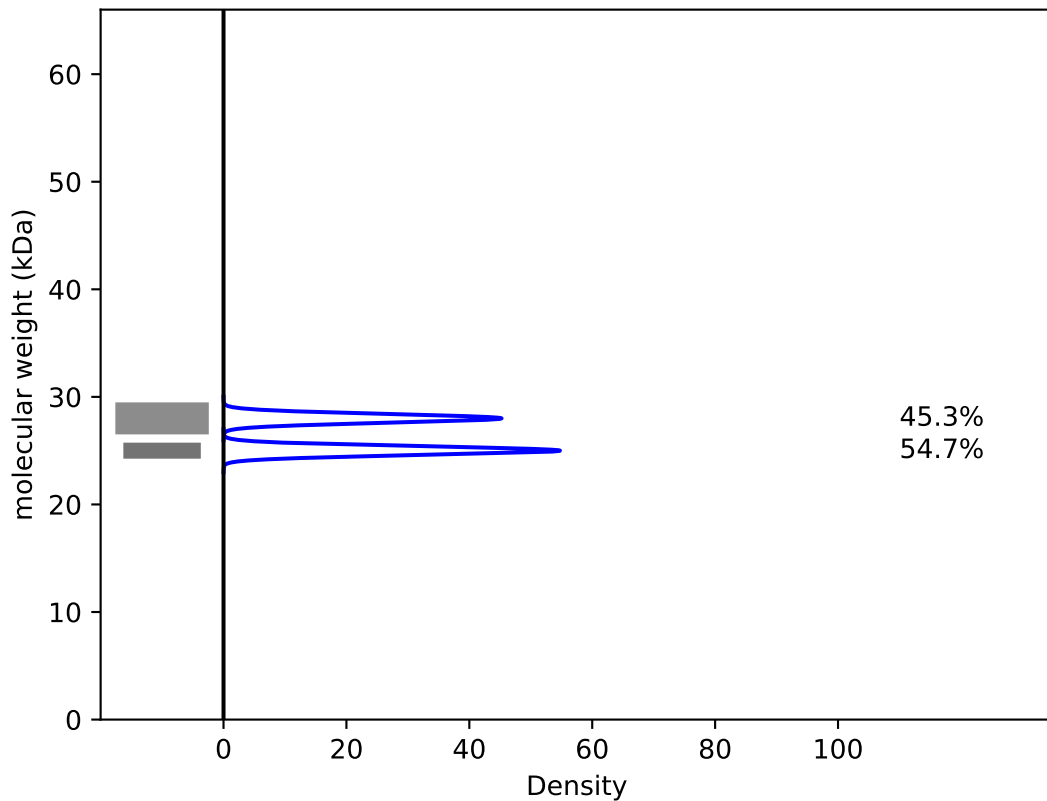

# Q96DI7



# Q96EE3

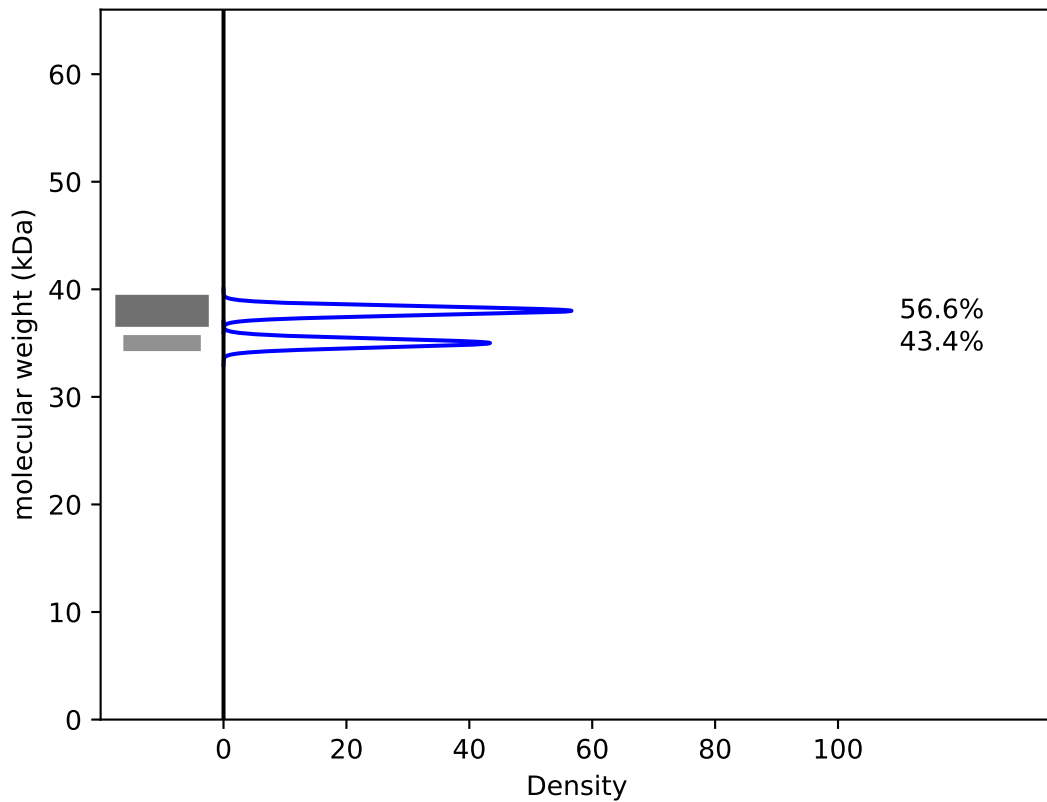

# Q96EK6



# Q96EP5



# Q96ER9





# Q96EY8

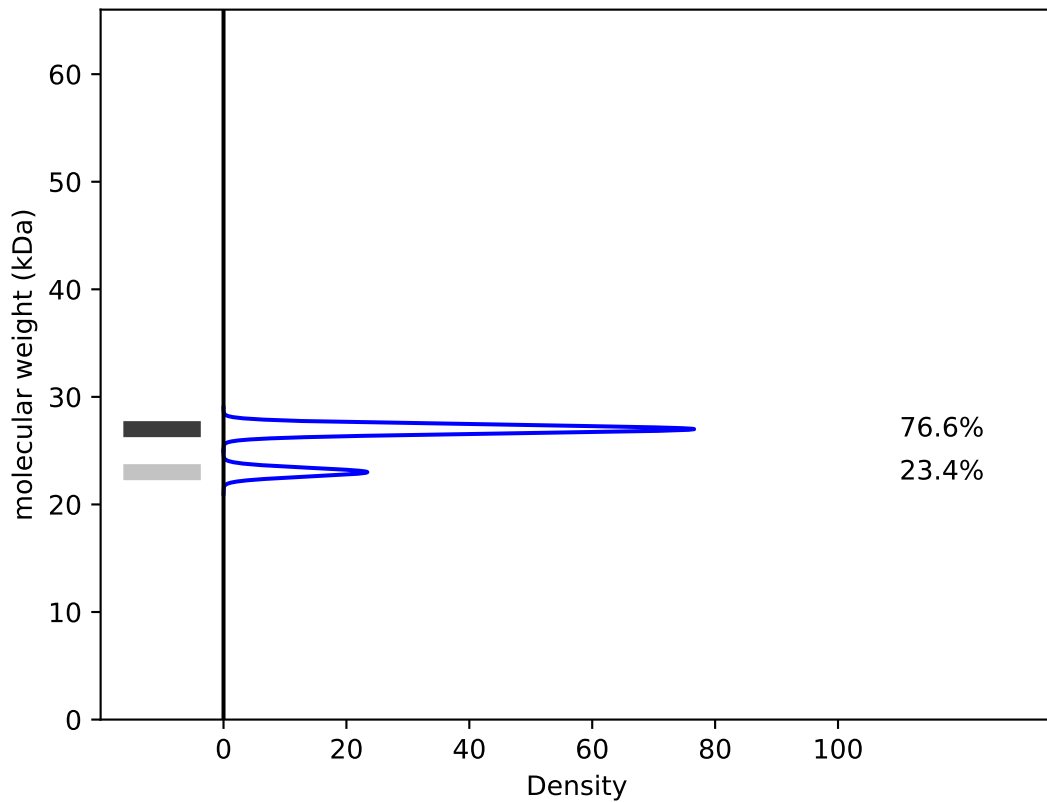

# Q96FW1



# Q96G21

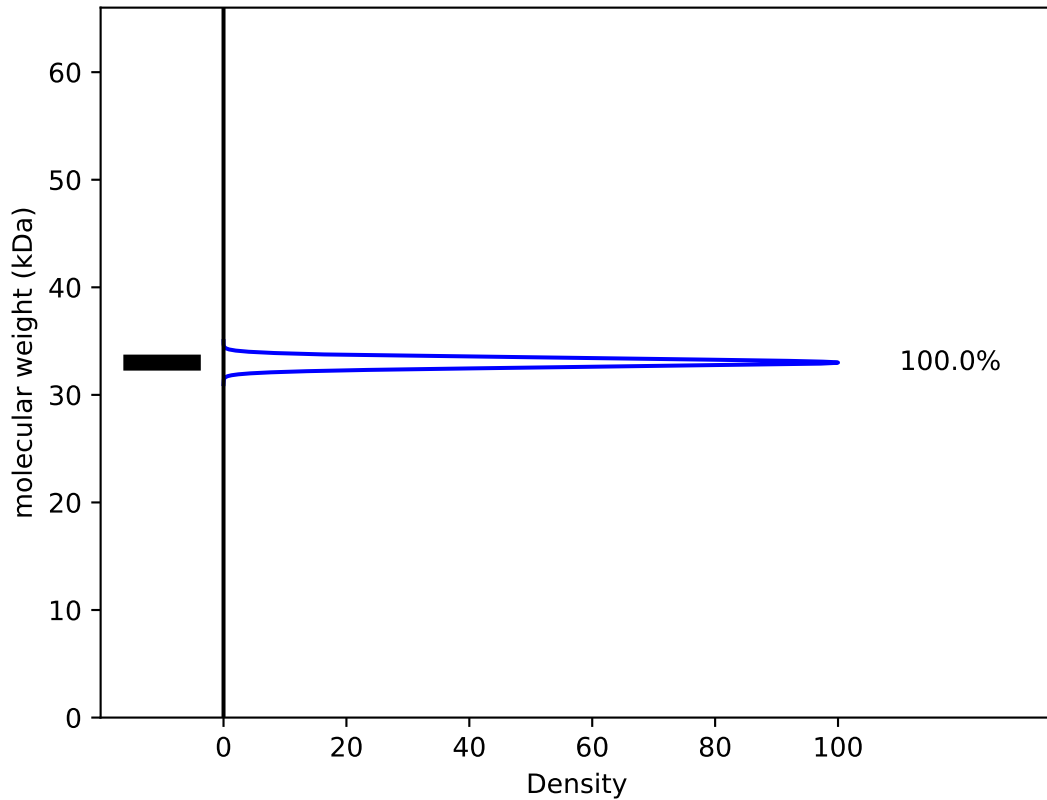

# Q96GK7

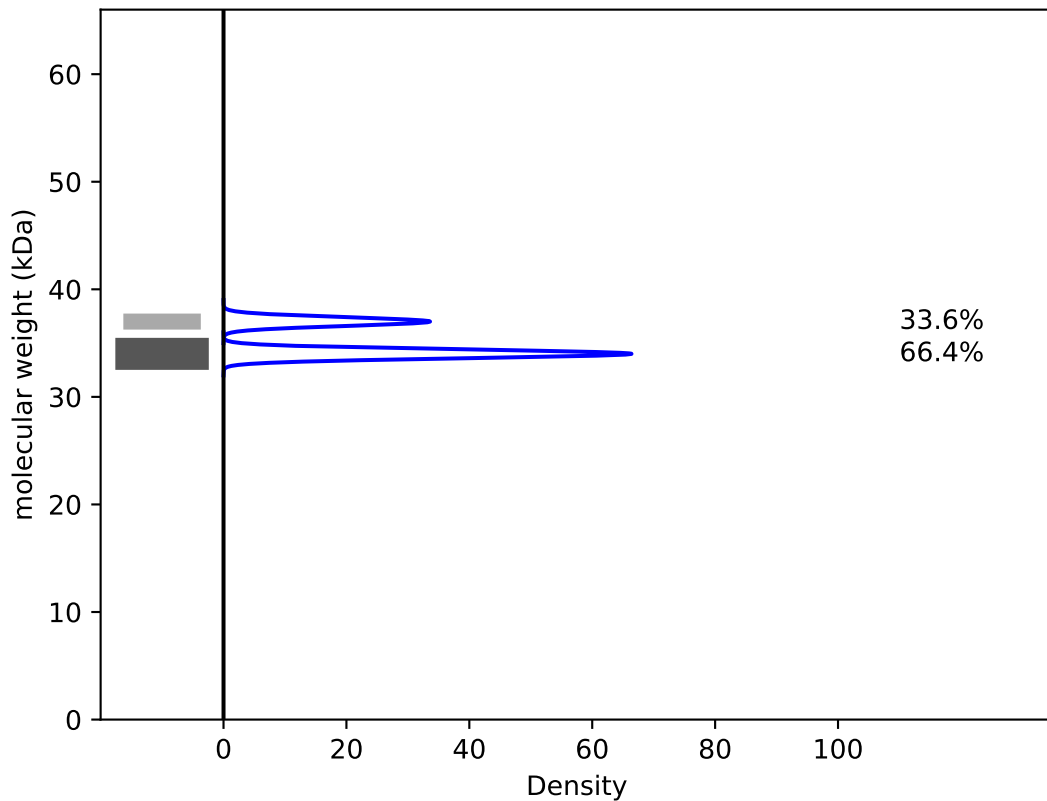

# Q6P2I3



# Q96GM5



# Q96HE7

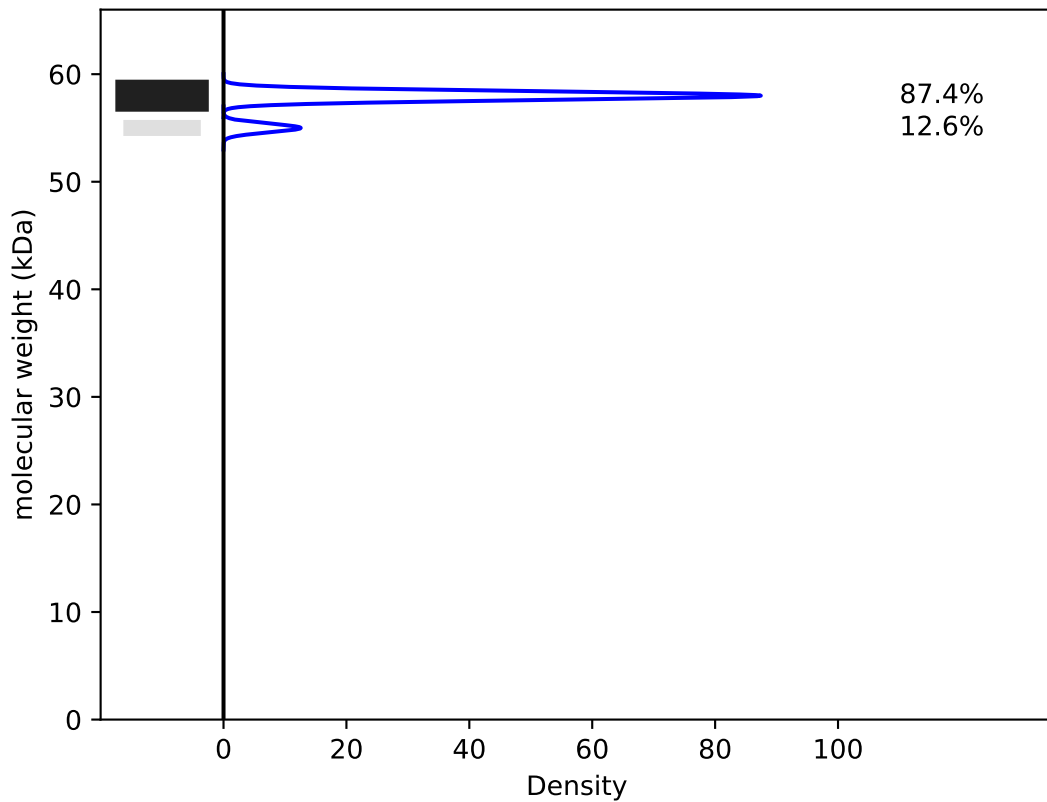

# Q86YB8

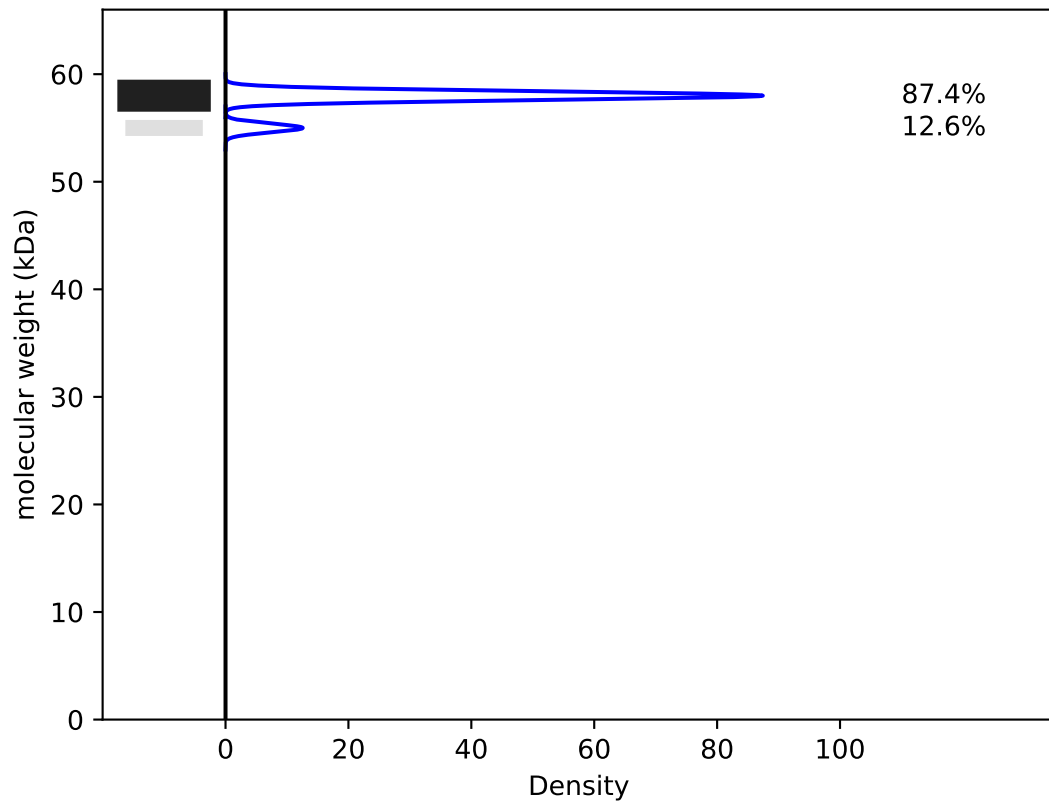



# Q96HS1

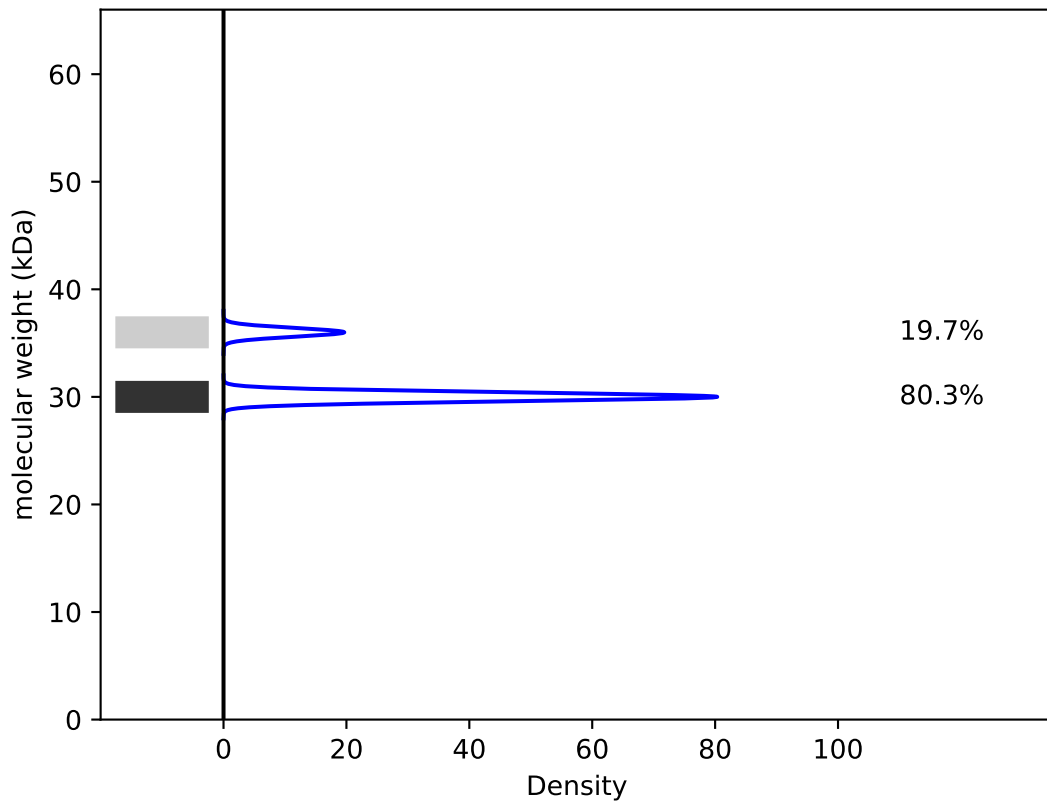

# Q96HY6



# Q96I24

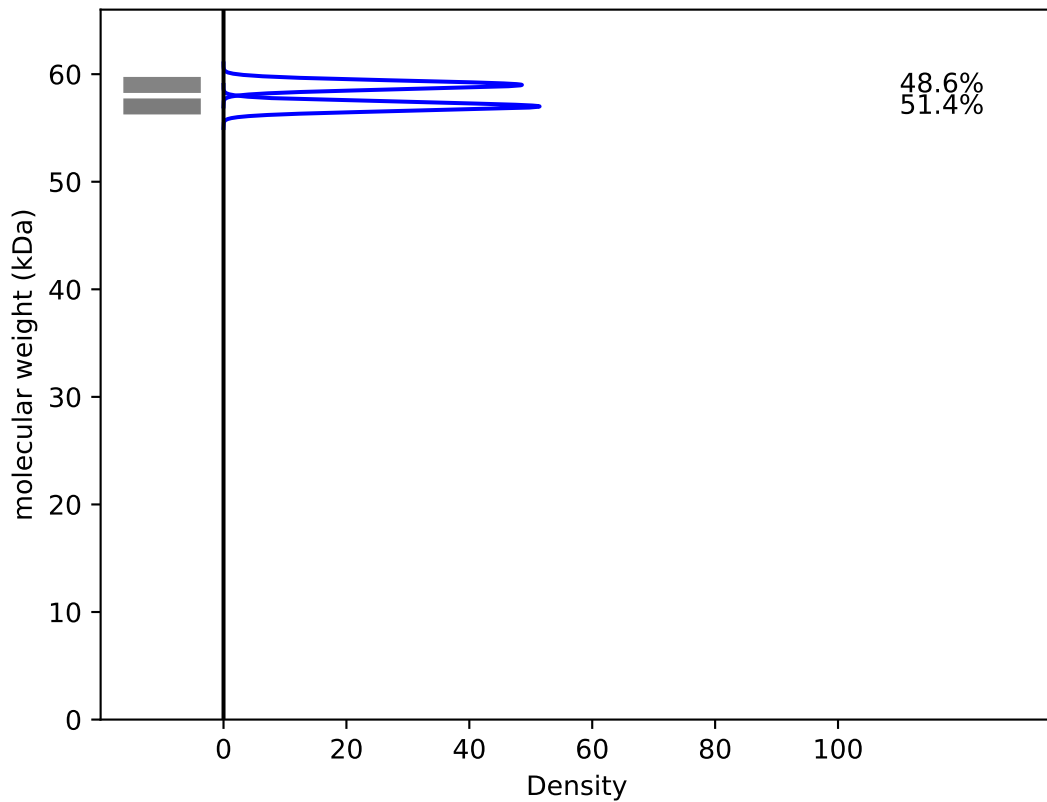

# Q96I99

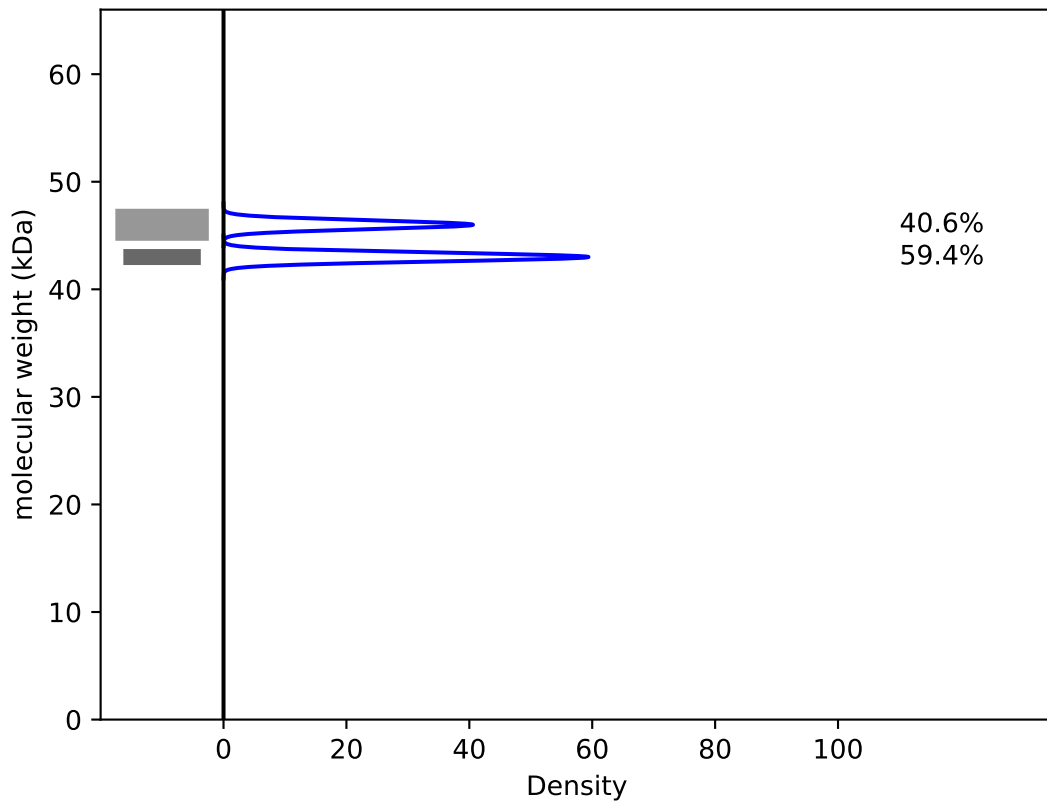

# Q96IJ6



# Q96IR7

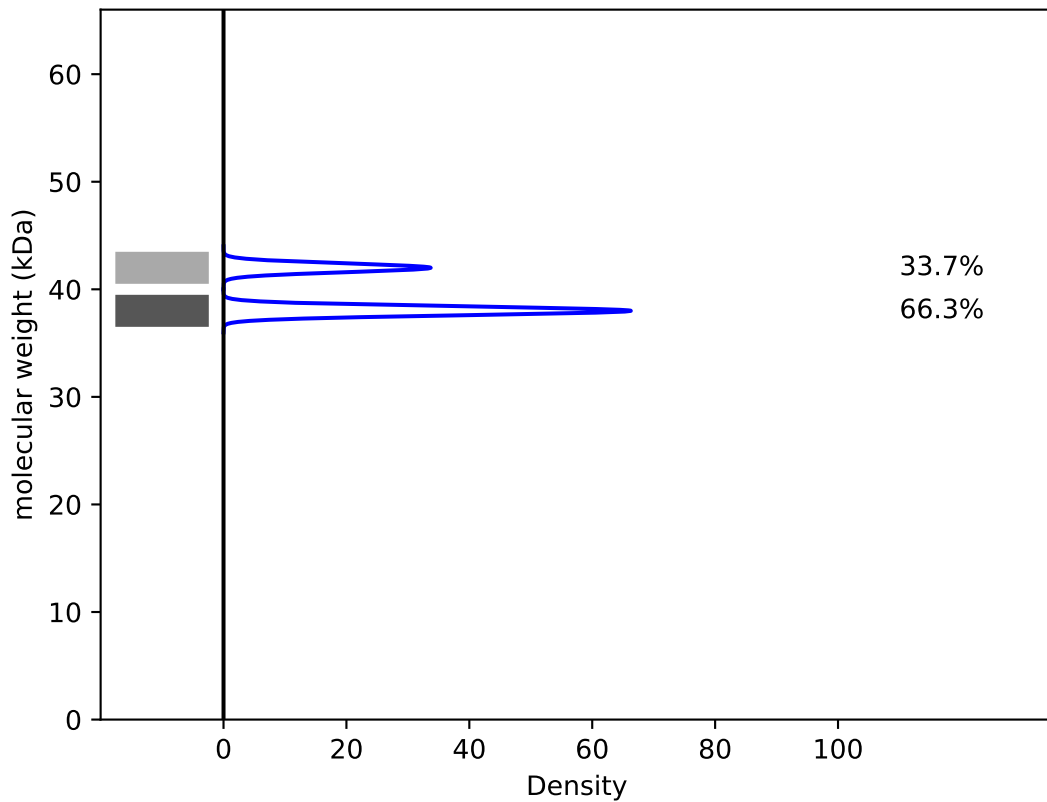

# Q96IU4



# Q96J01

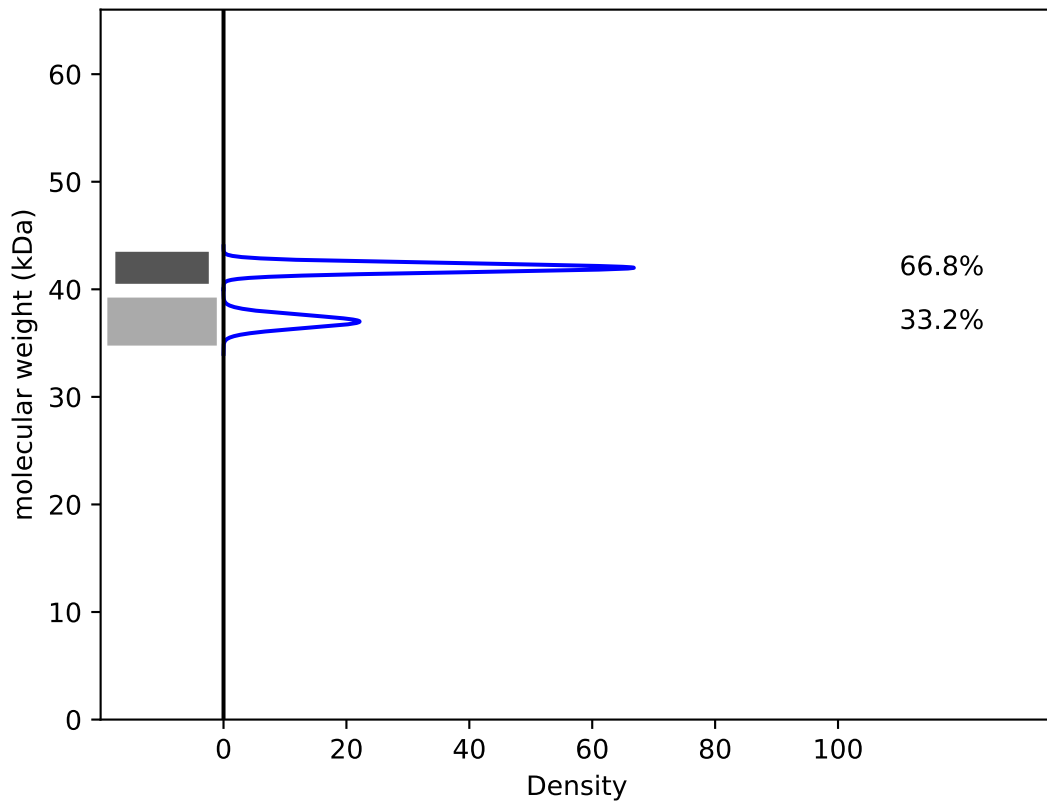



Q96JJ7

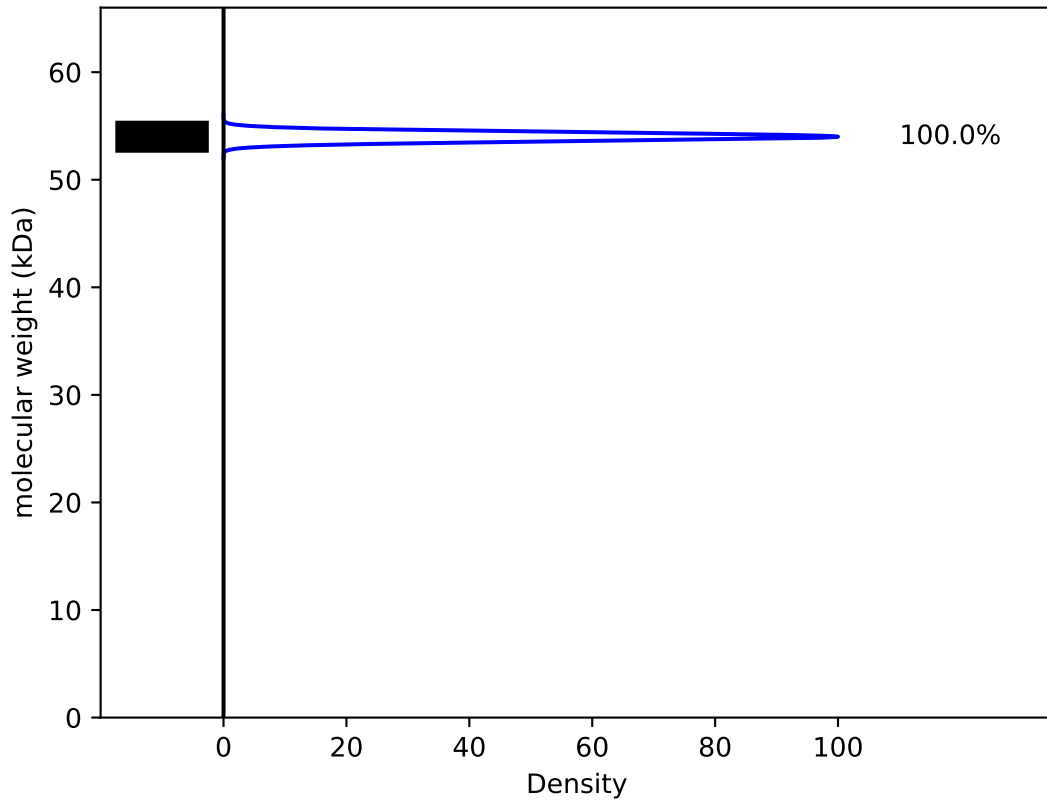

# Q96K17



# Q96PU8



Q99426



Q99436



# Q99439

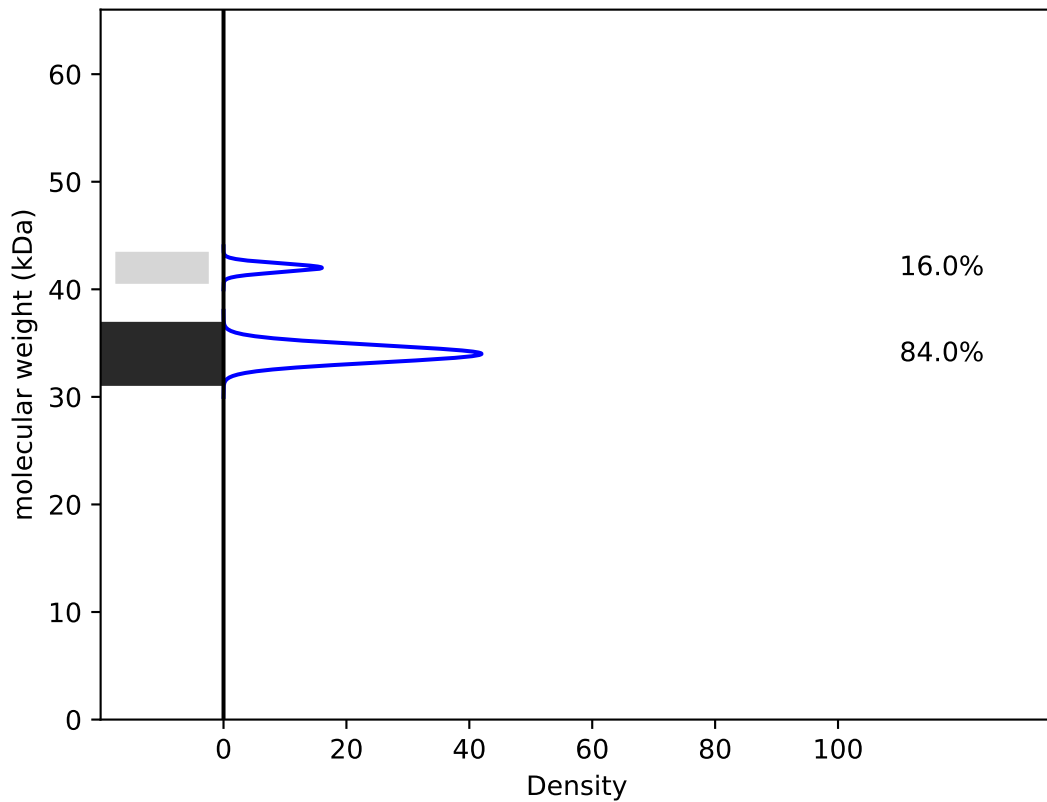

# Q99497

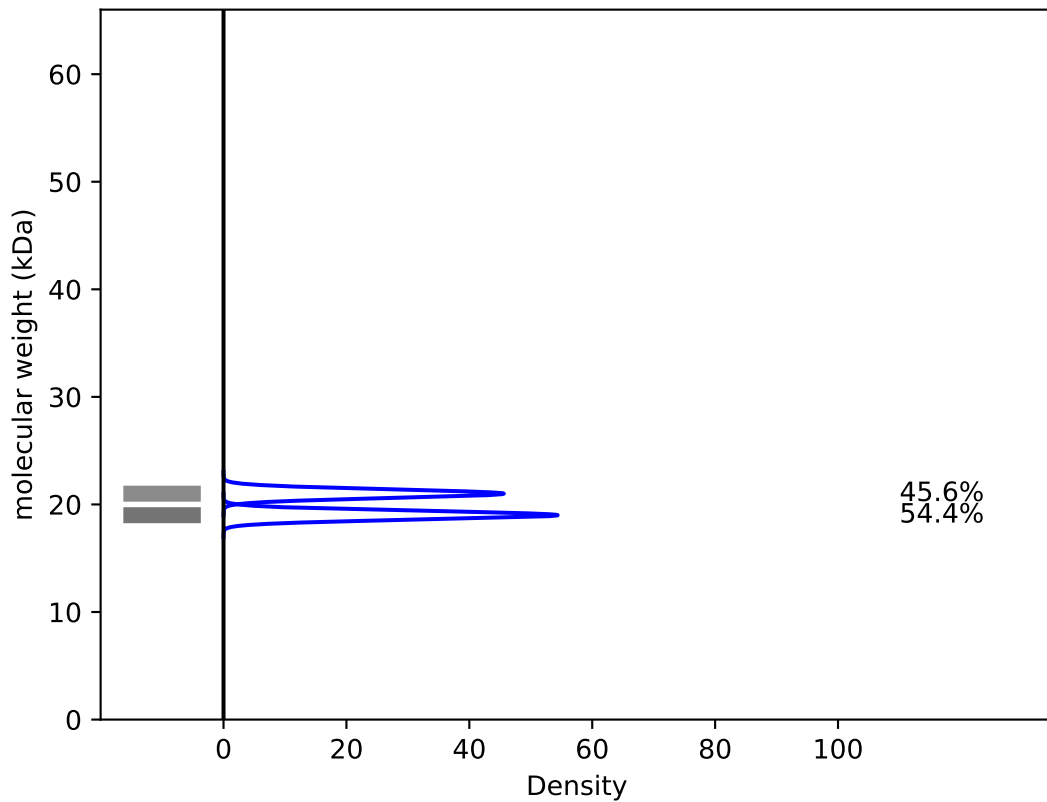

Q99536

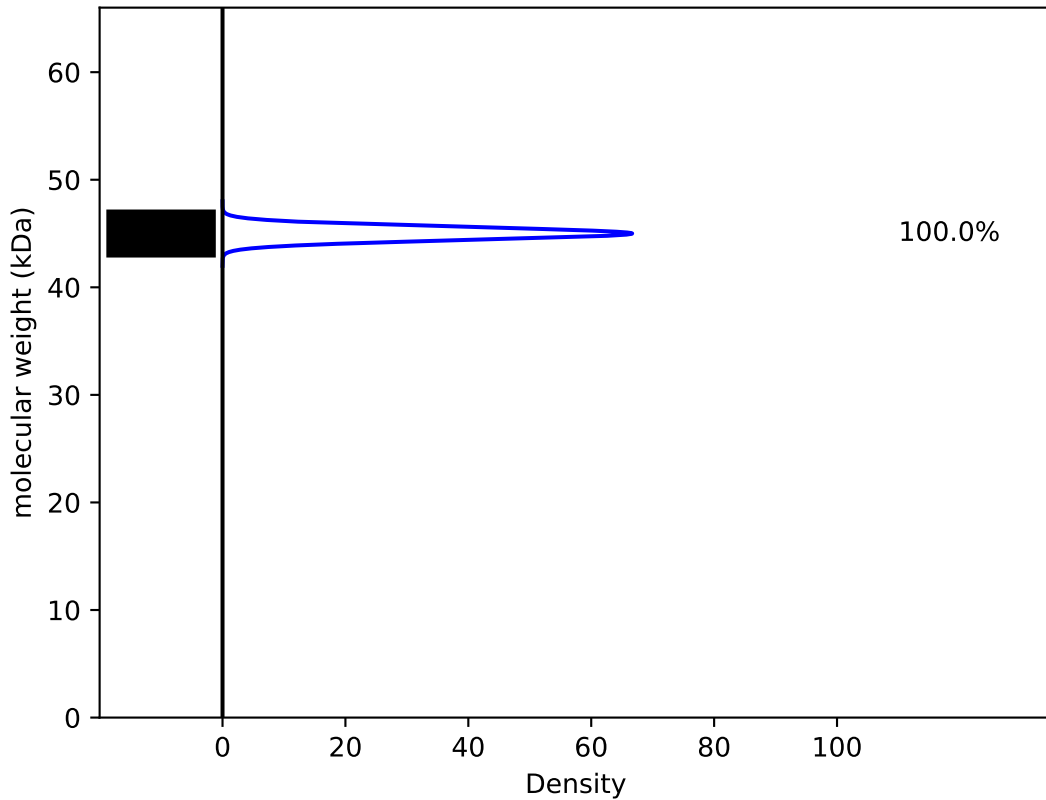



Q99598



# Q99615

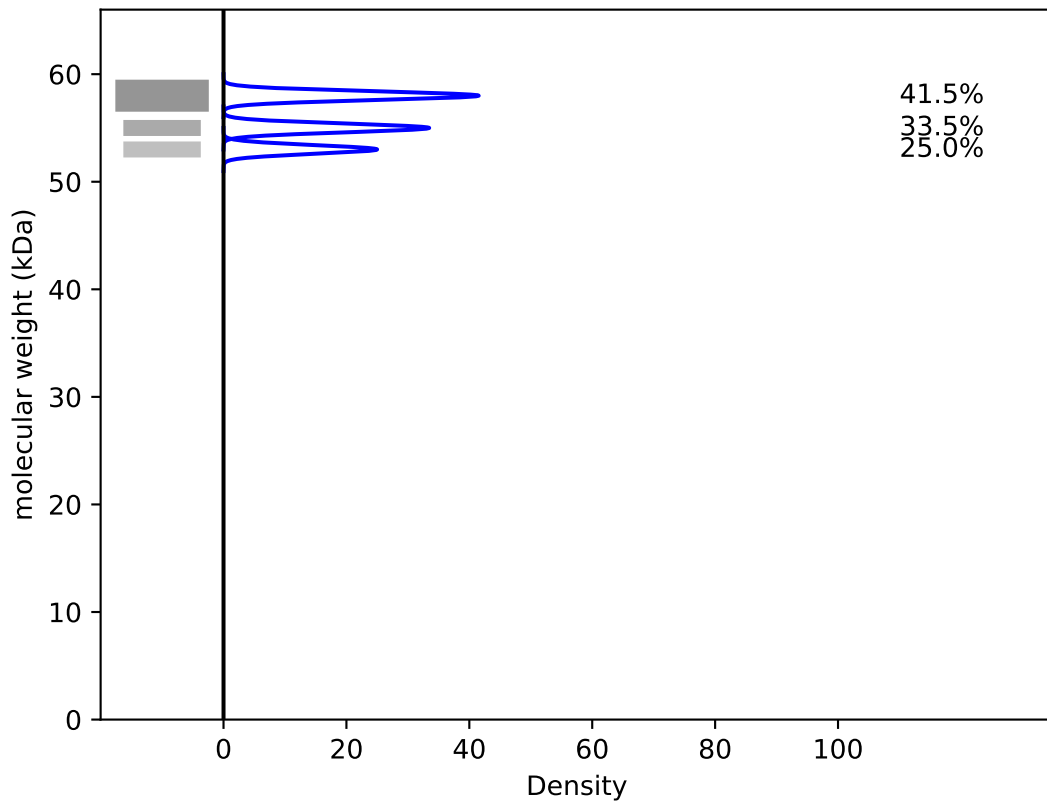

# Q99623

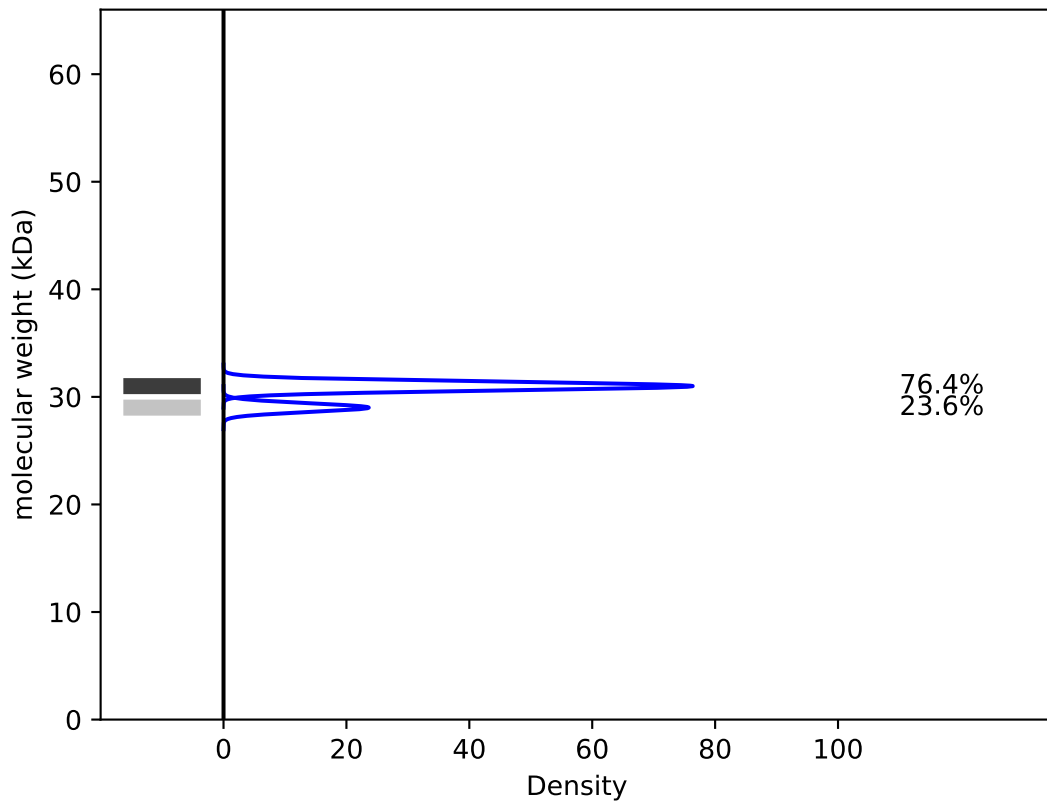

Q99627



Q99653



# Q99714

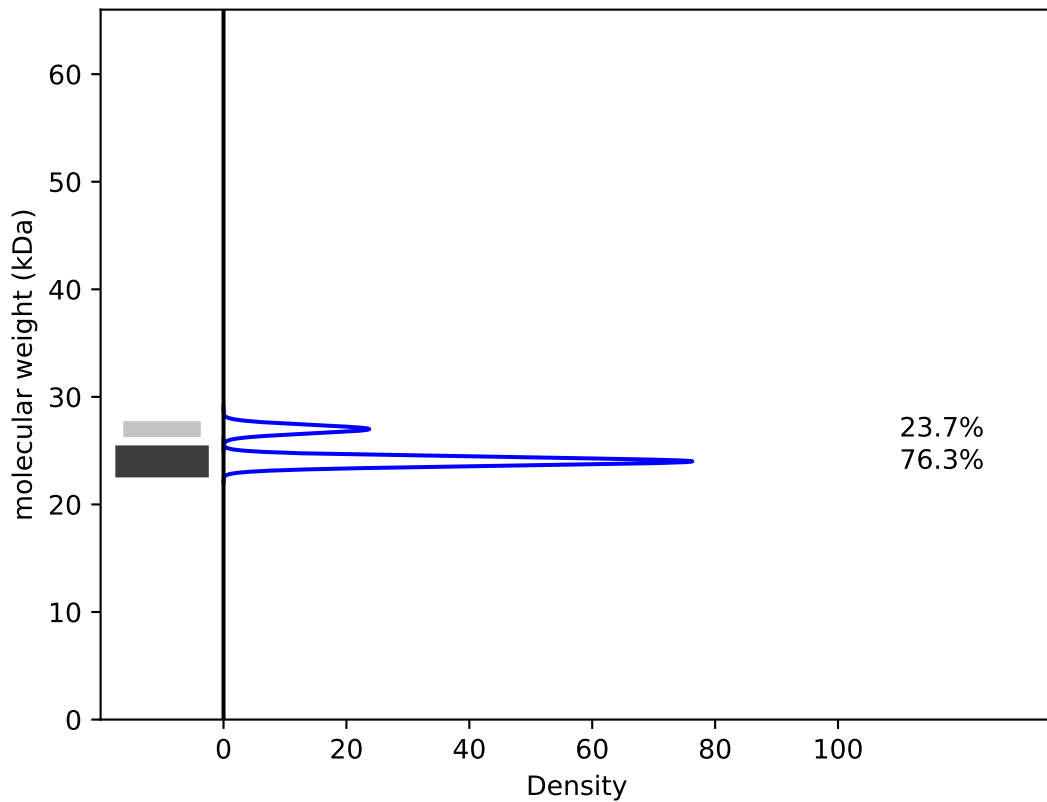

Q99720



# Q99729

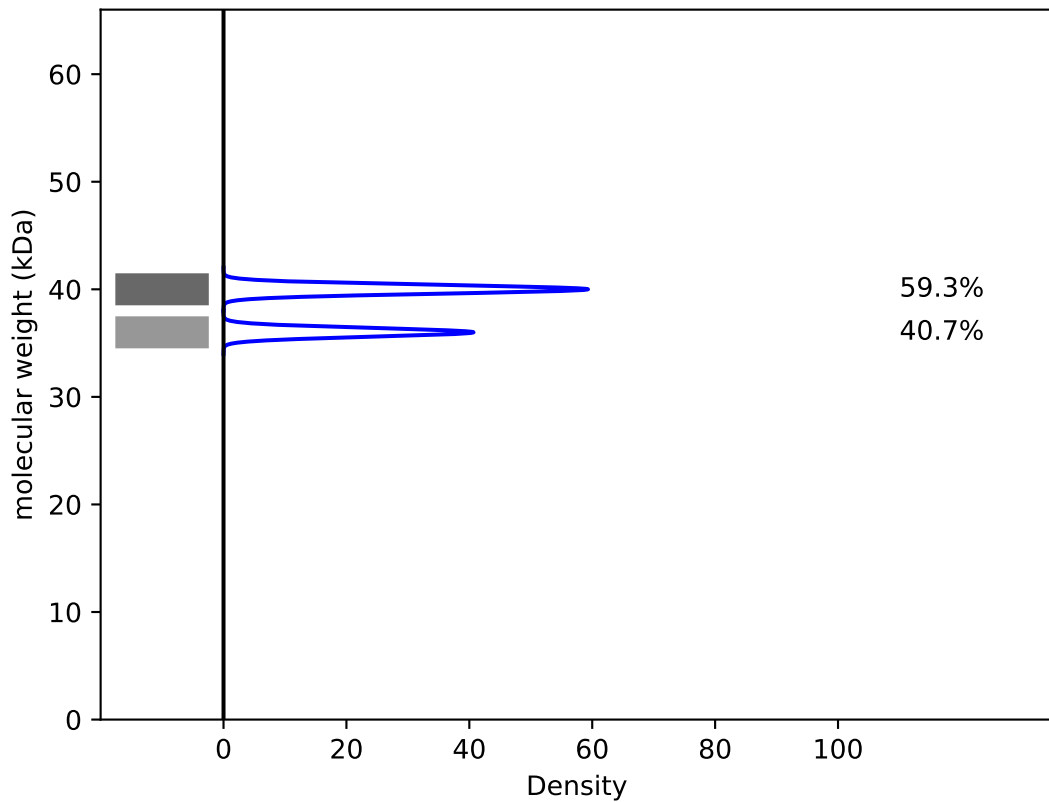



# Q99816



# Q99829

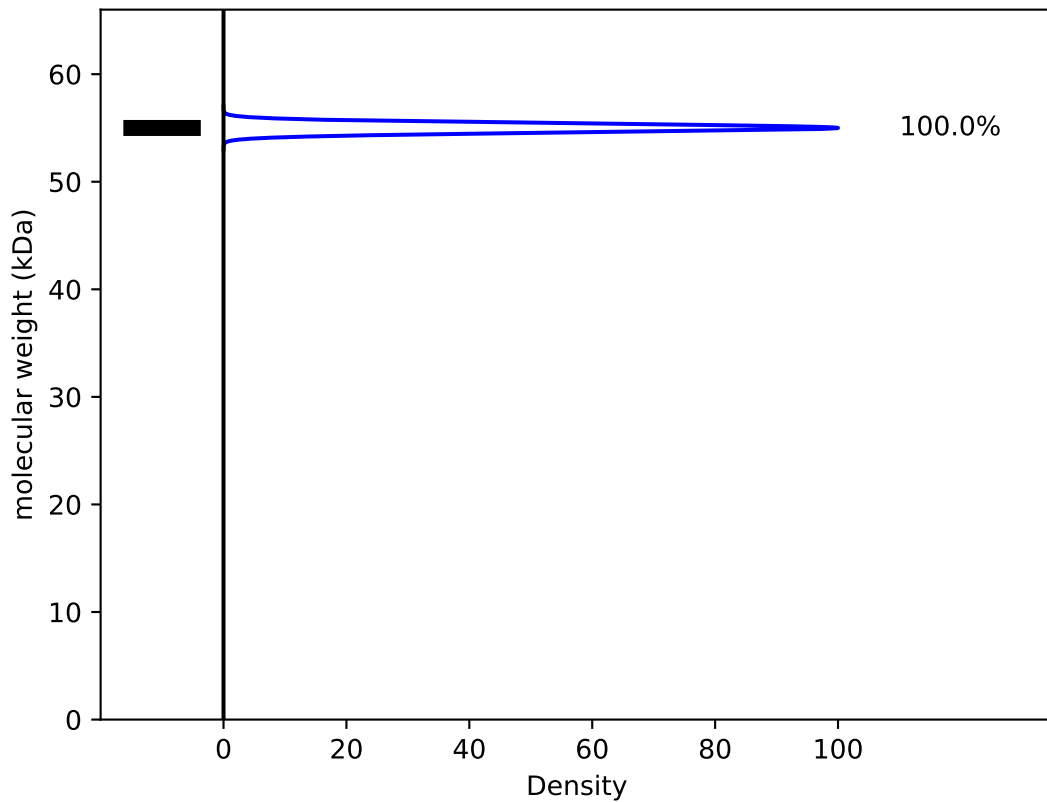

Q99832



Q99848



# Q99873

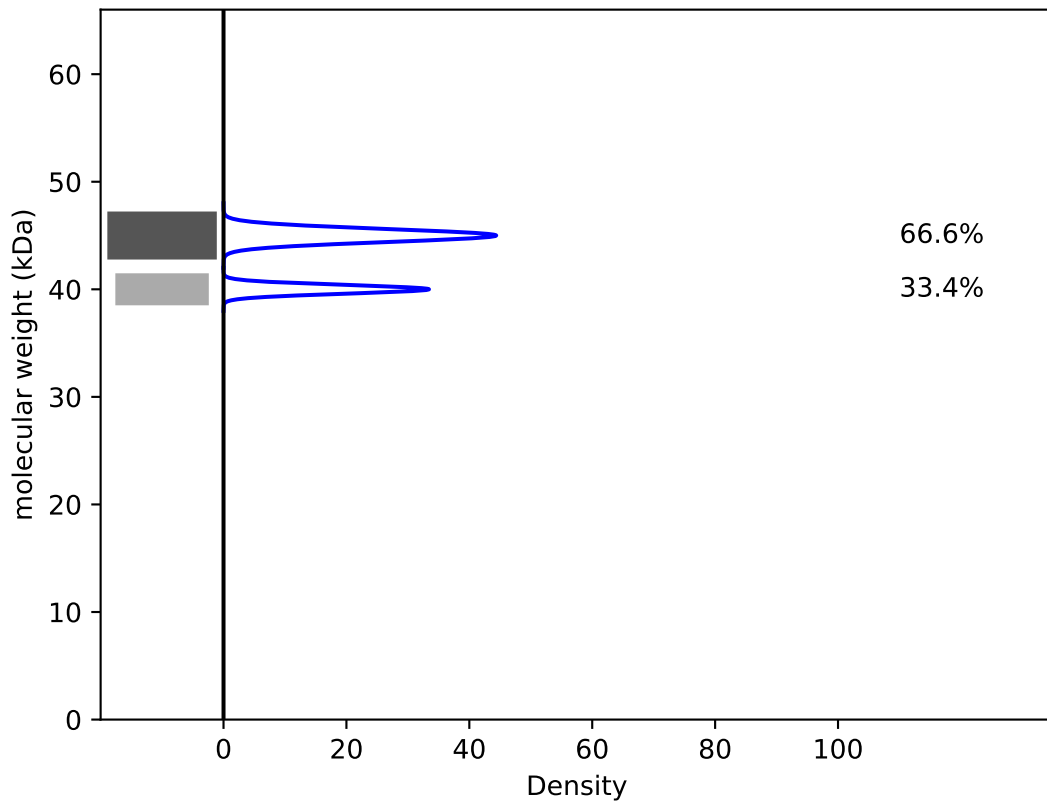

# Q9NR22

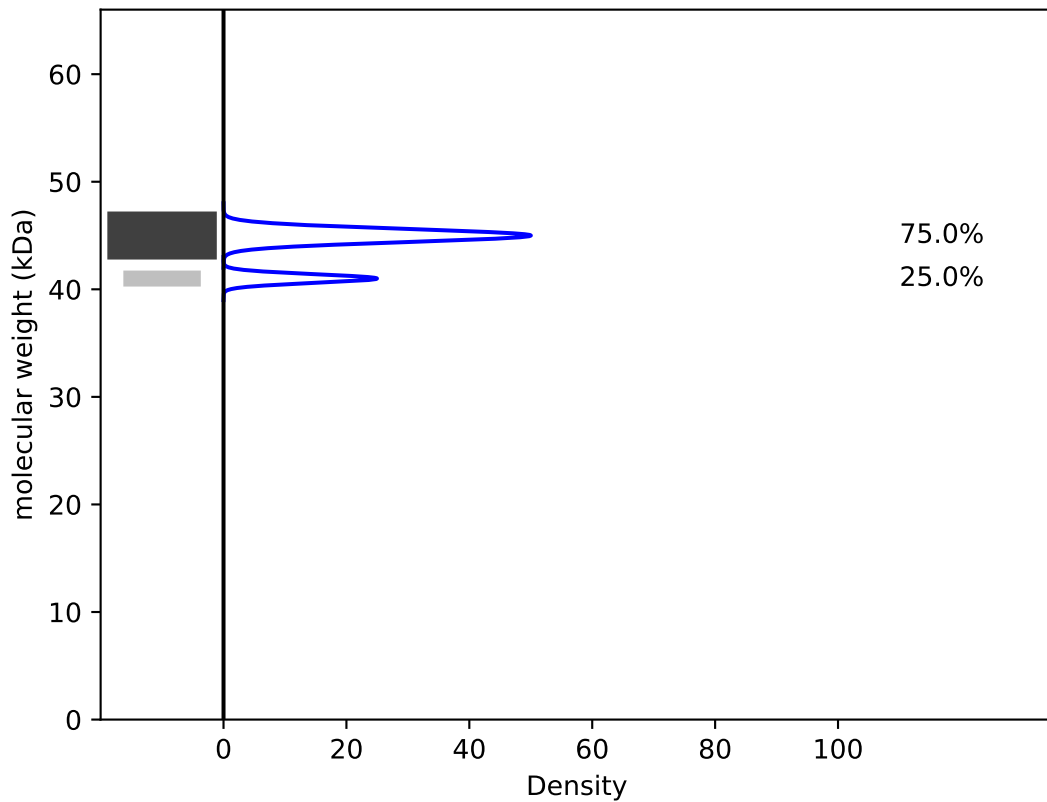

# Q99961

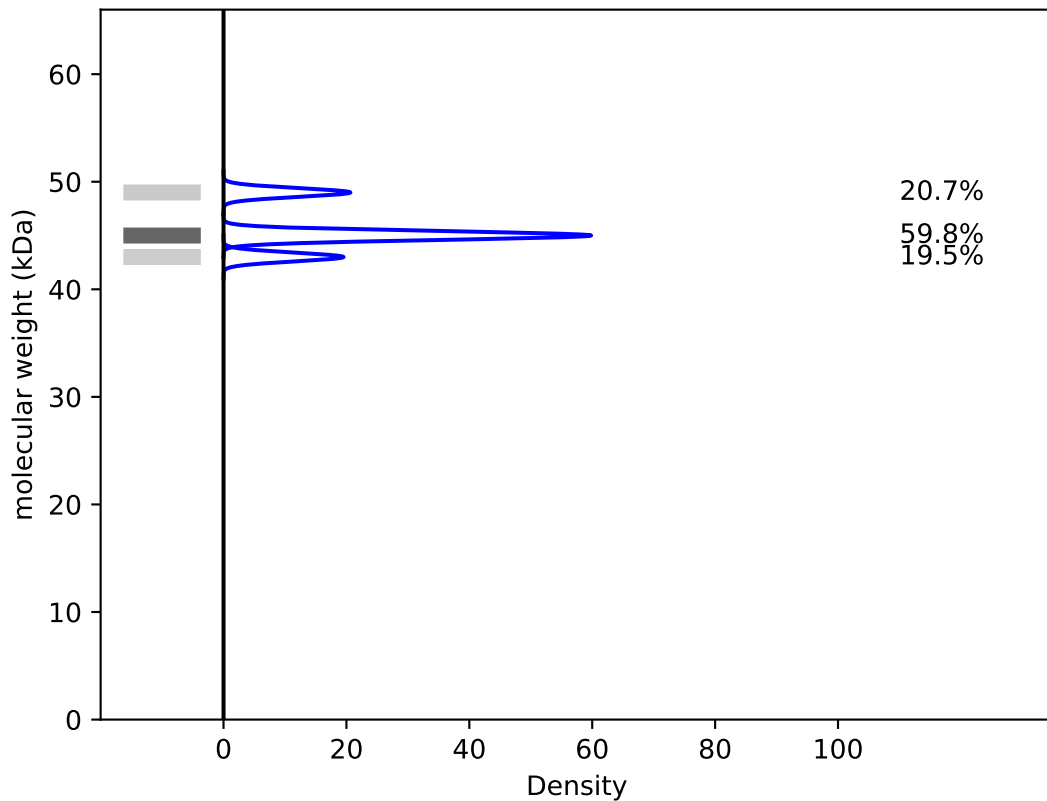

# Q99962

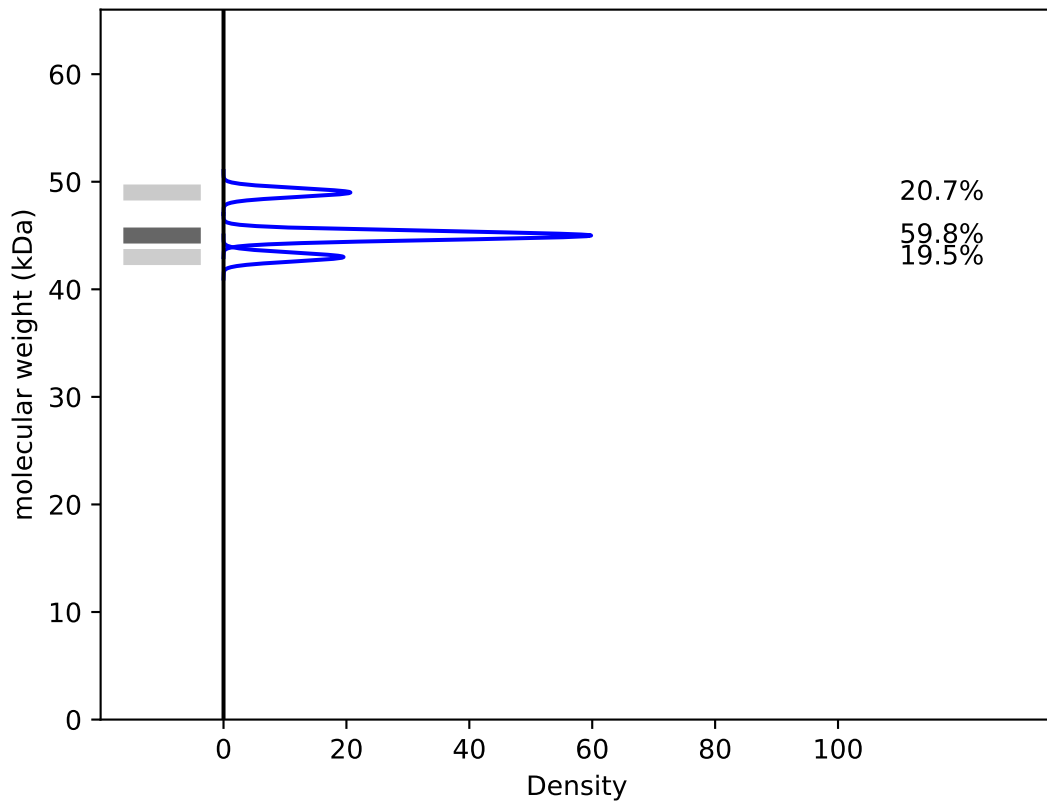



# Q9BPX5

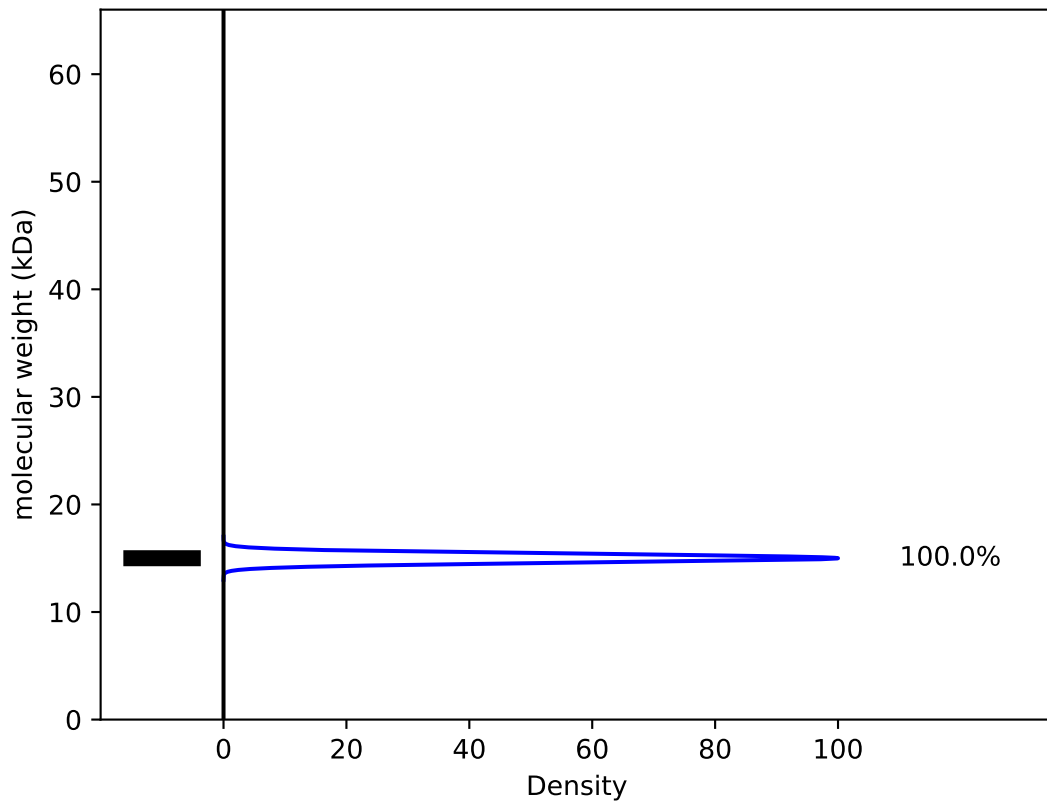

# Q9BQ15



# Q96AH0



# Q9BQ75

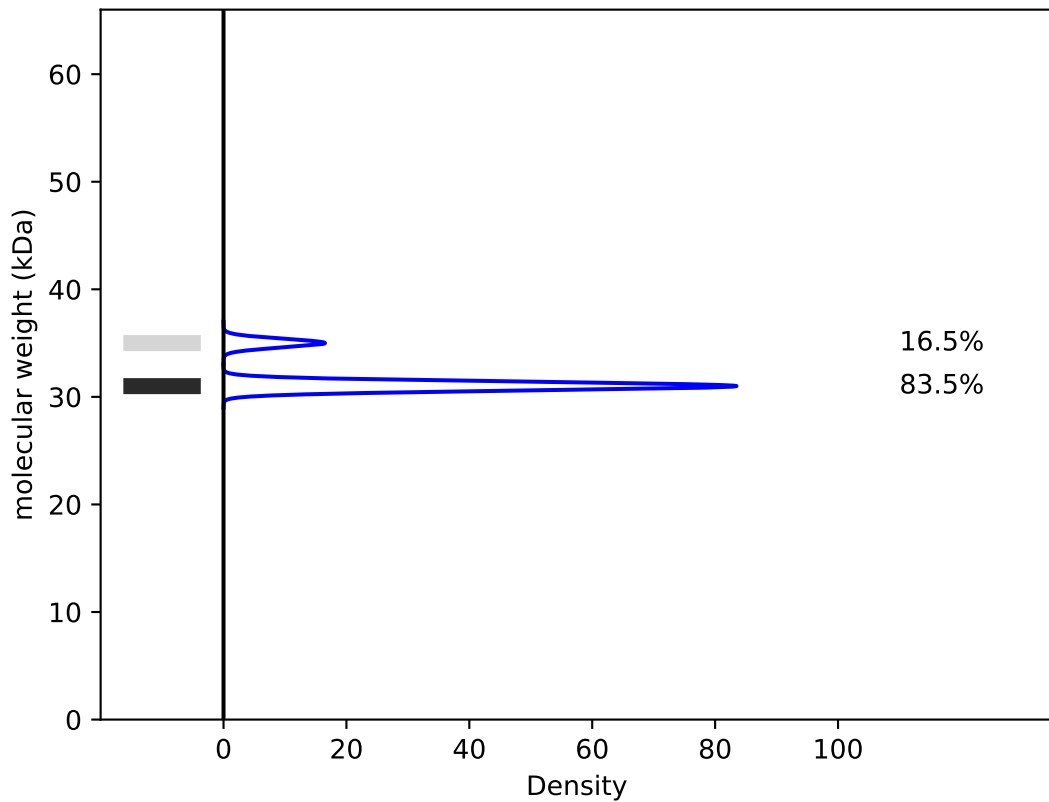

# Q9BQA1



# Q9BQE3

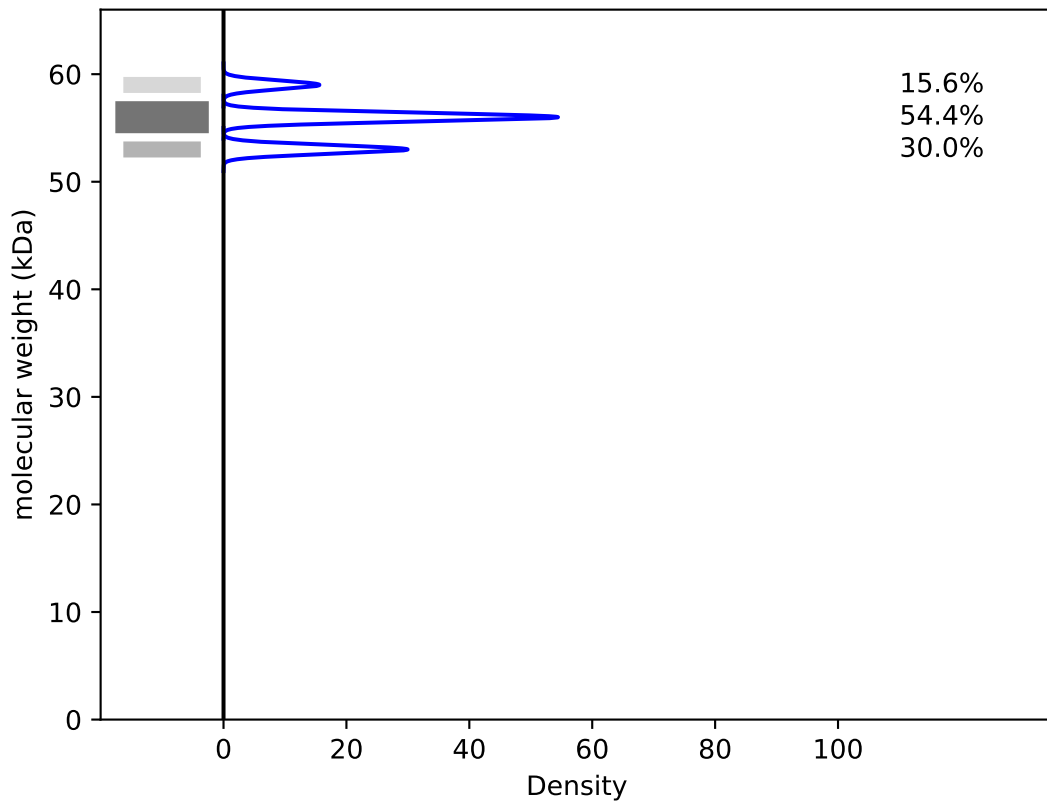

# Q9BRQ8

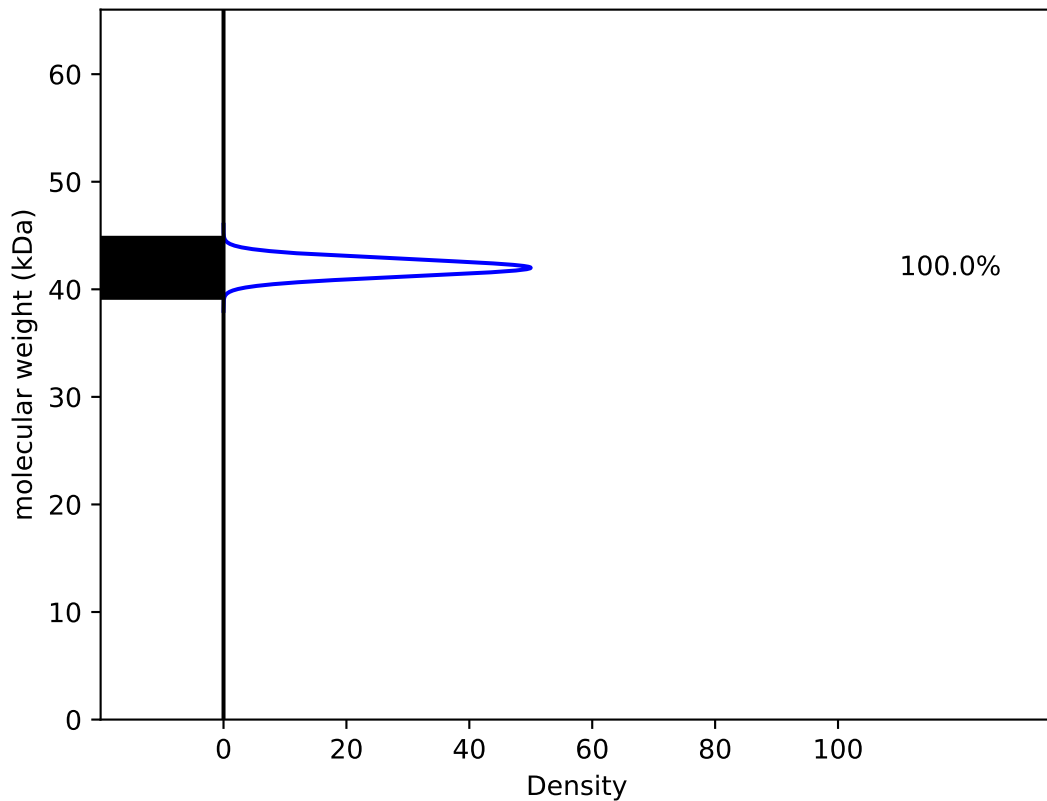

# Q9BRX2

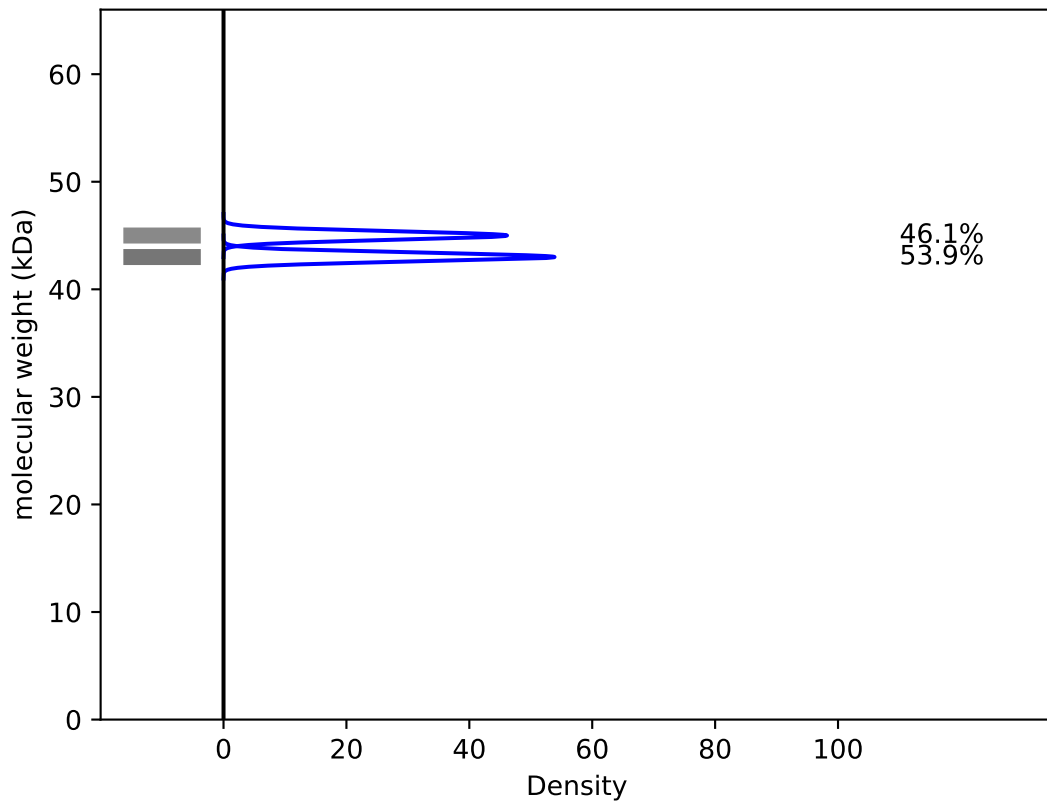



# Q9BRX8



# Q9BS26



# Q9BSD7



# Q9BSH4



# Q9BSV6



# Q9BTT0



# Q9BTV4



# Q9BTZ2

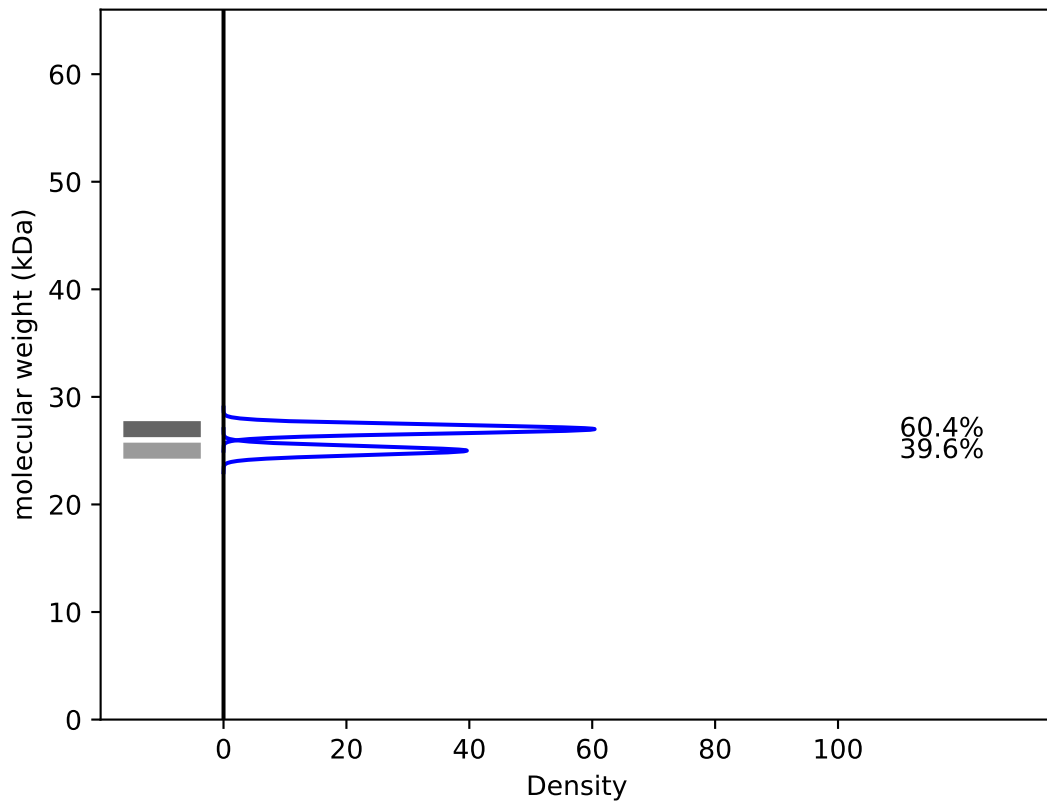



# Q6PKH6



# POCG22



# Q9BUF5

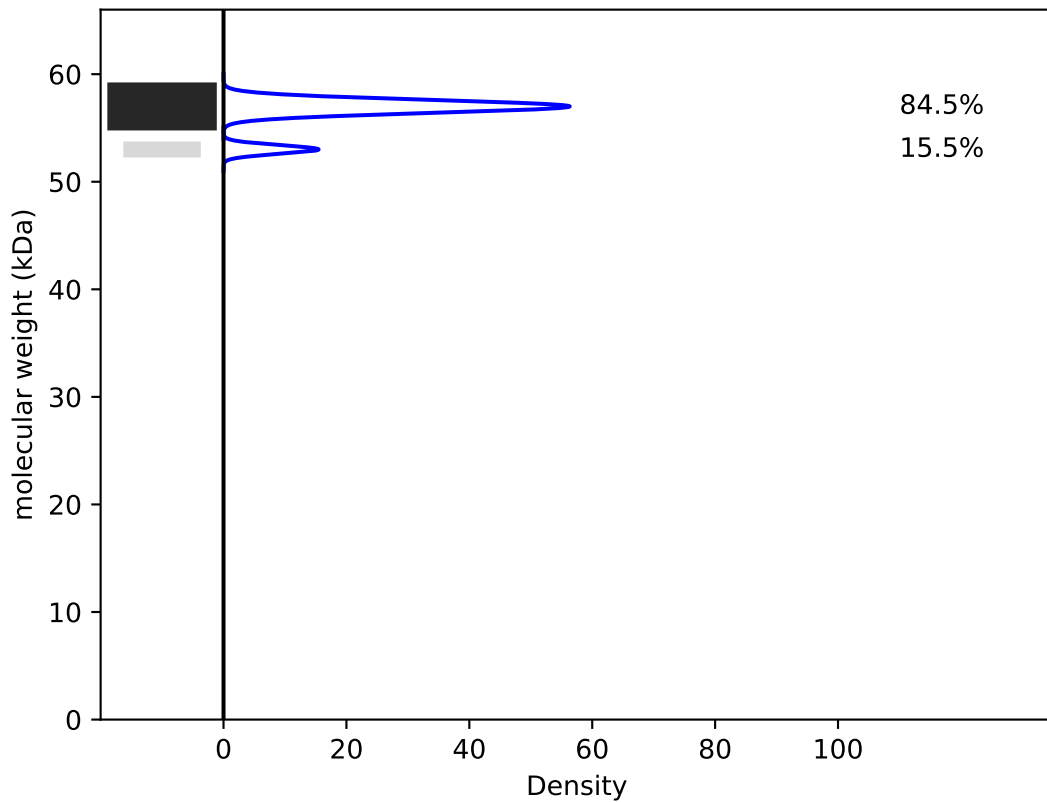

# Q9BUL8

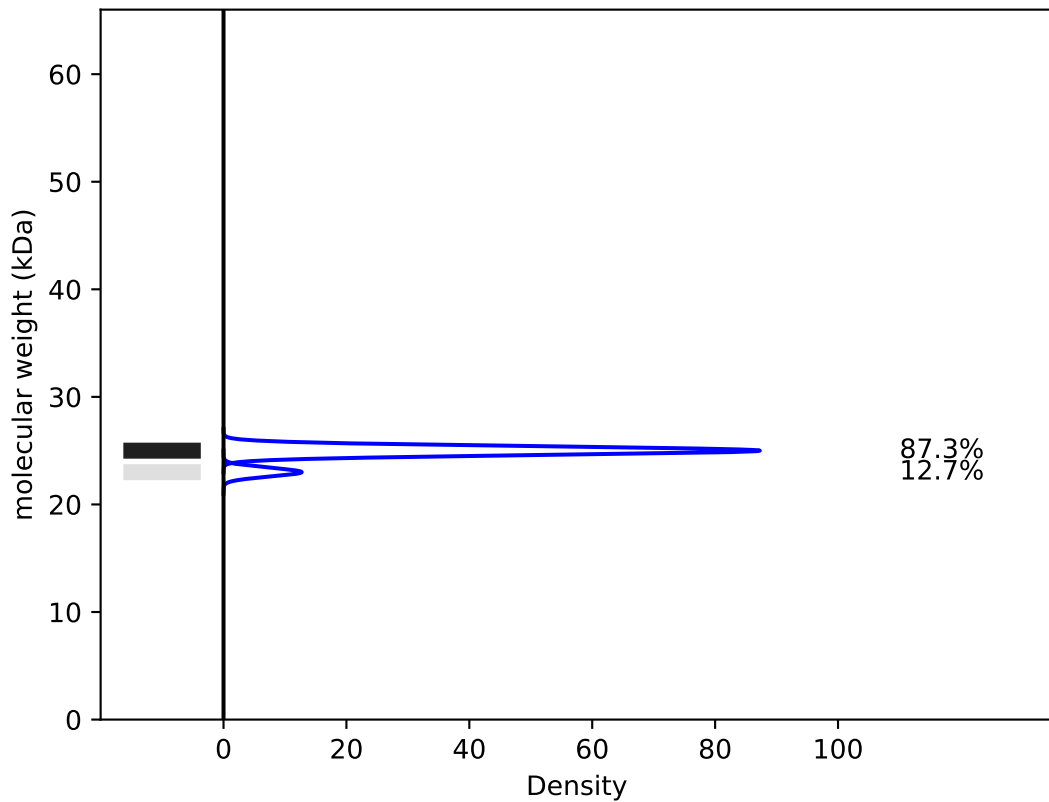

# Q9BUP3



# Q9BV20

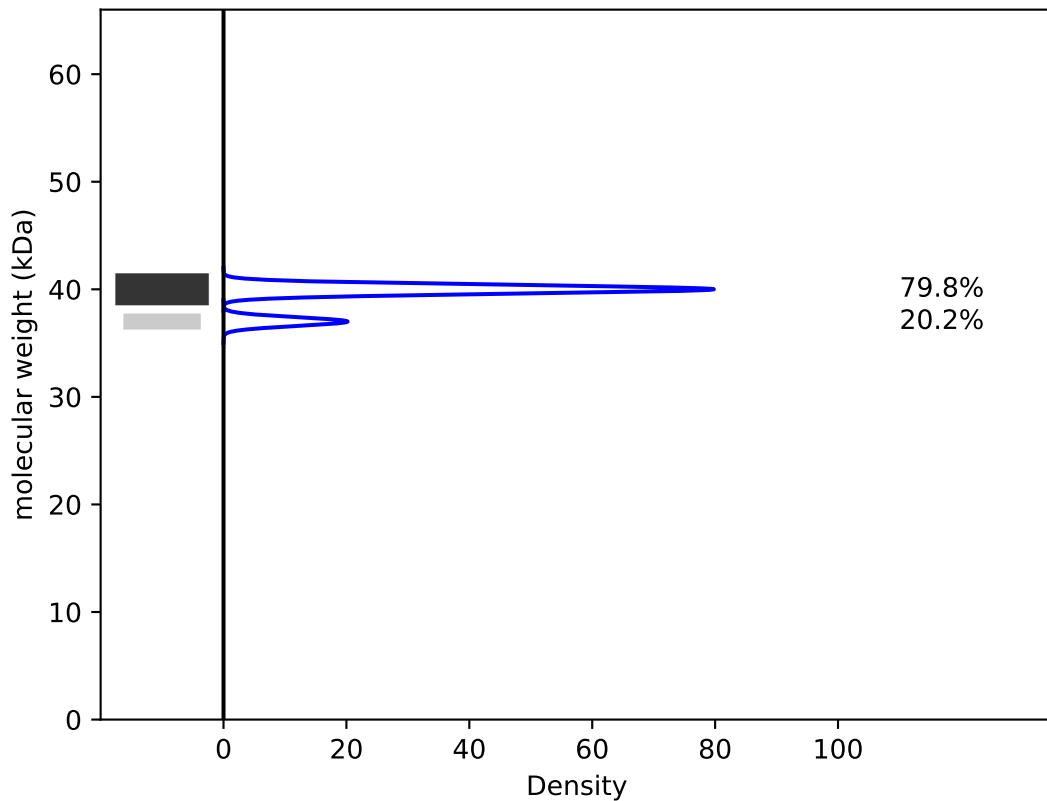

# Q9BV38



# Q9BV86





# Q9BVK6



# Q9BVL2

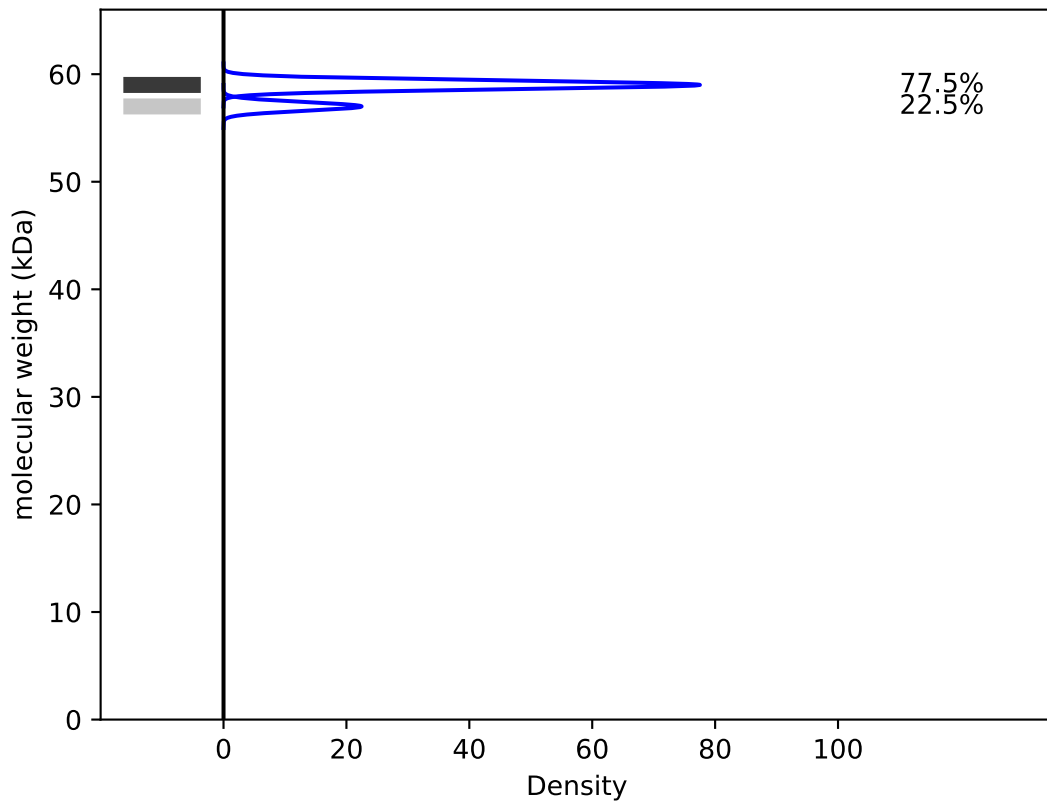

# Q9BWD1

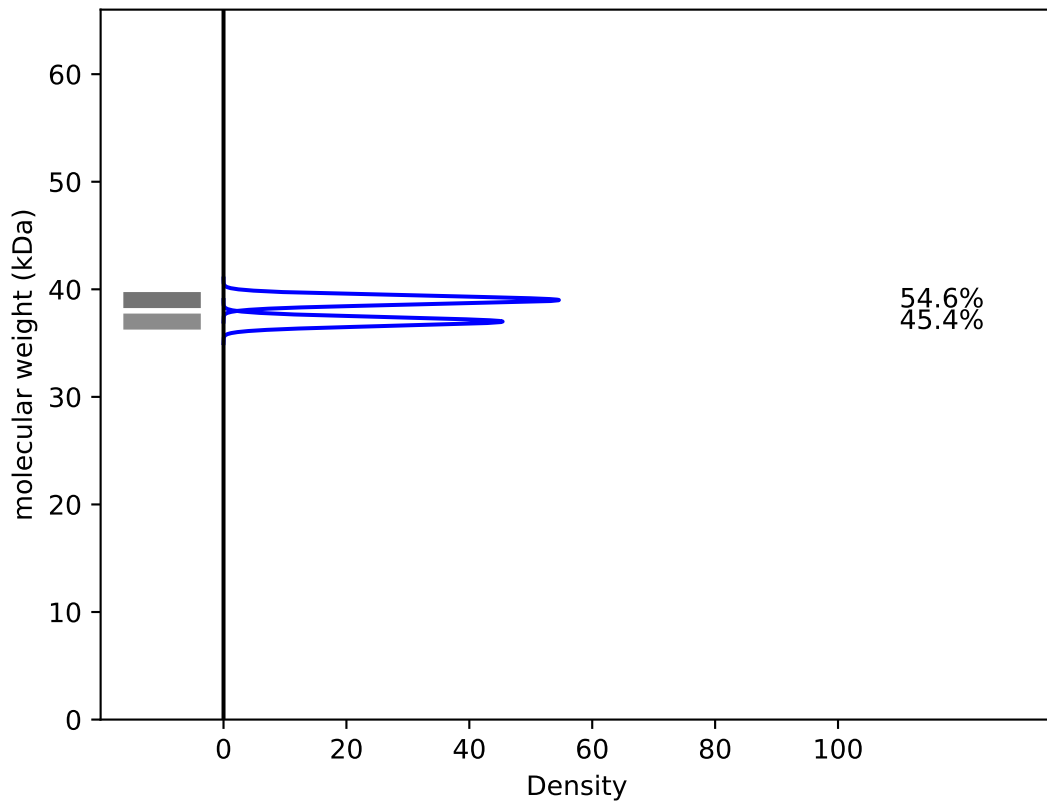

# Q9BWF3

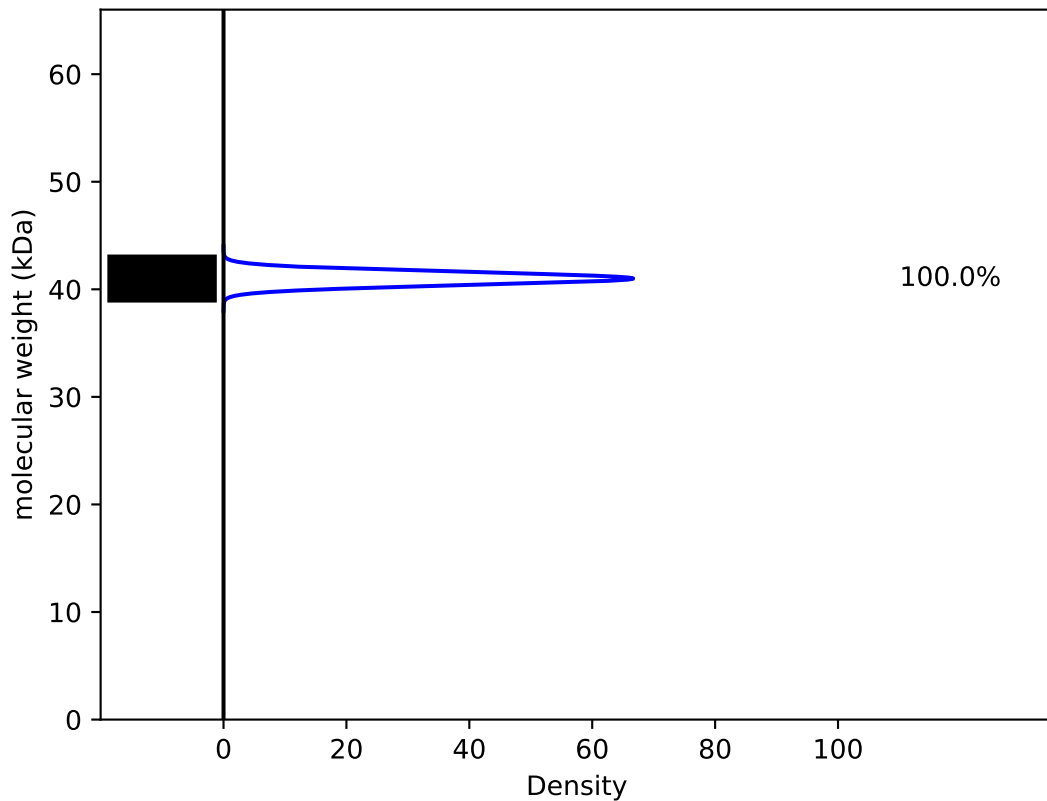

Q9BQ04



# Q9BWM7

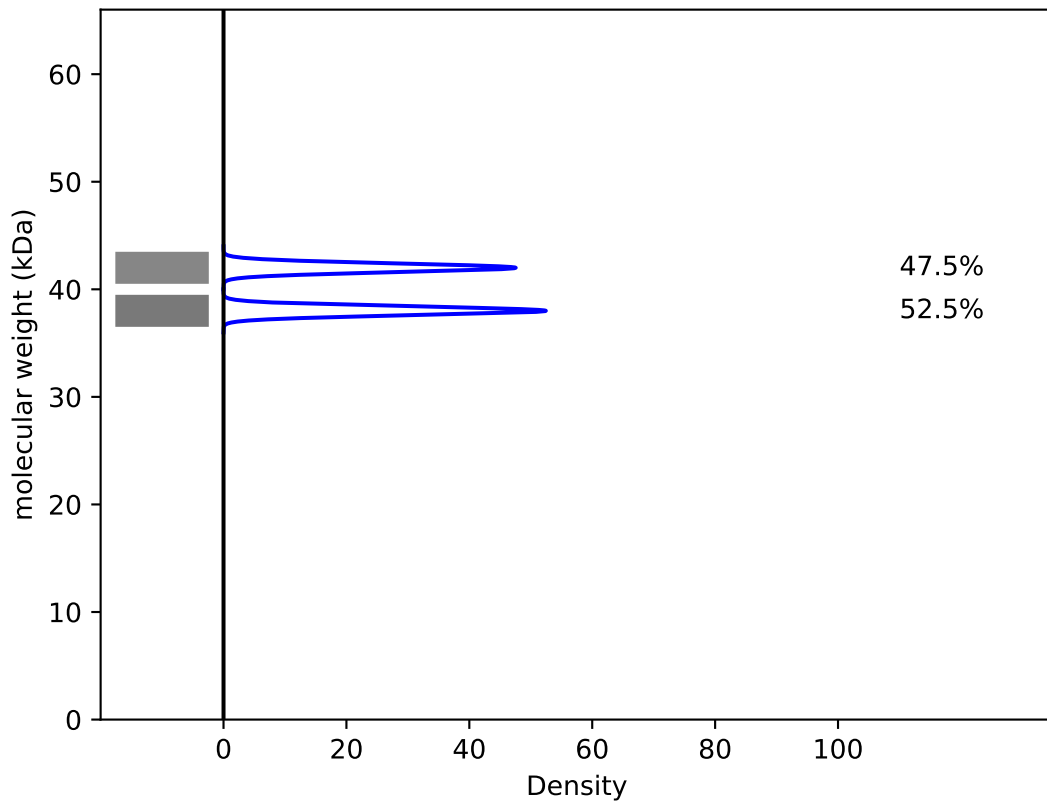

# Q9BXS5



Q9Y6Q5





# Q9BY32



# Q9BY43



# Q9BYD1

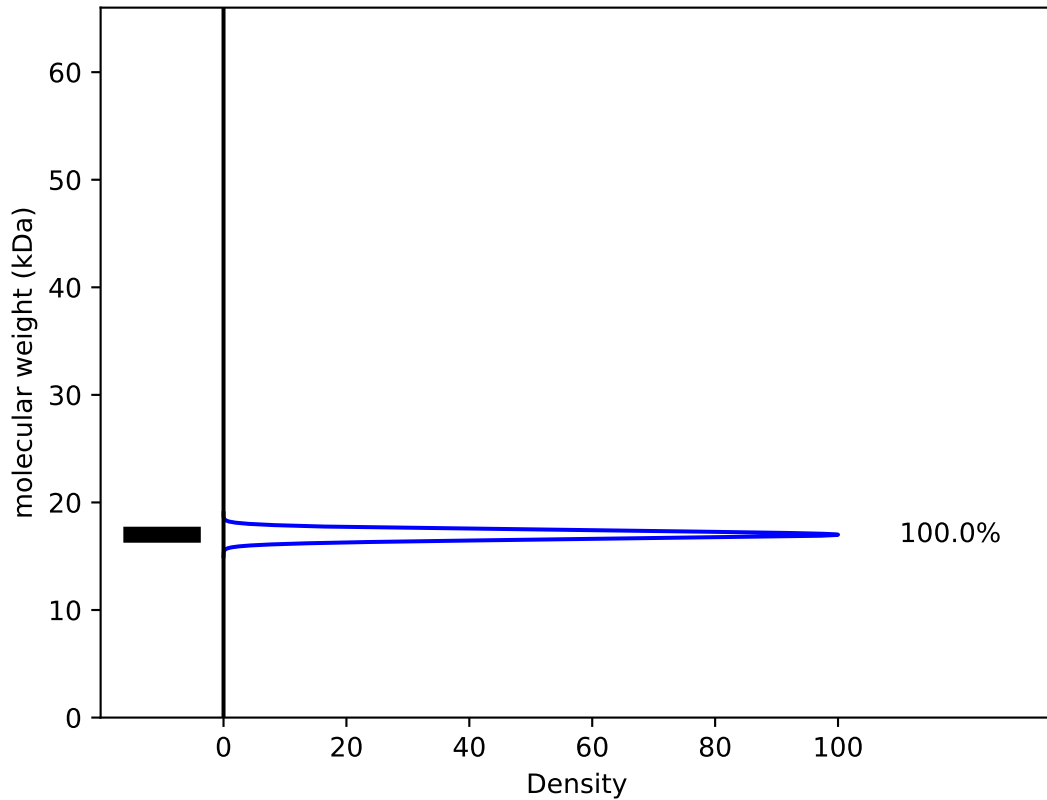

# Q9BYD3



# Q9BYG3

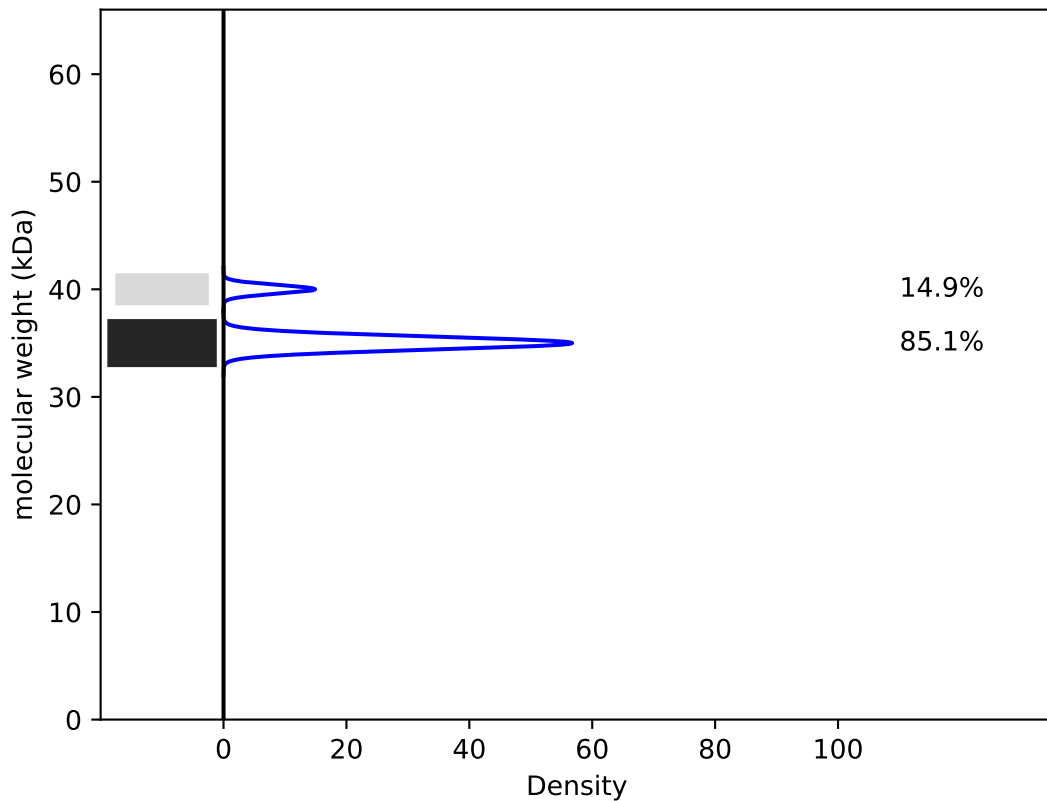

# Q9BYN8



# Q9BZG1



# Q9BZK7





Q9BQ87



# Q9BZX2

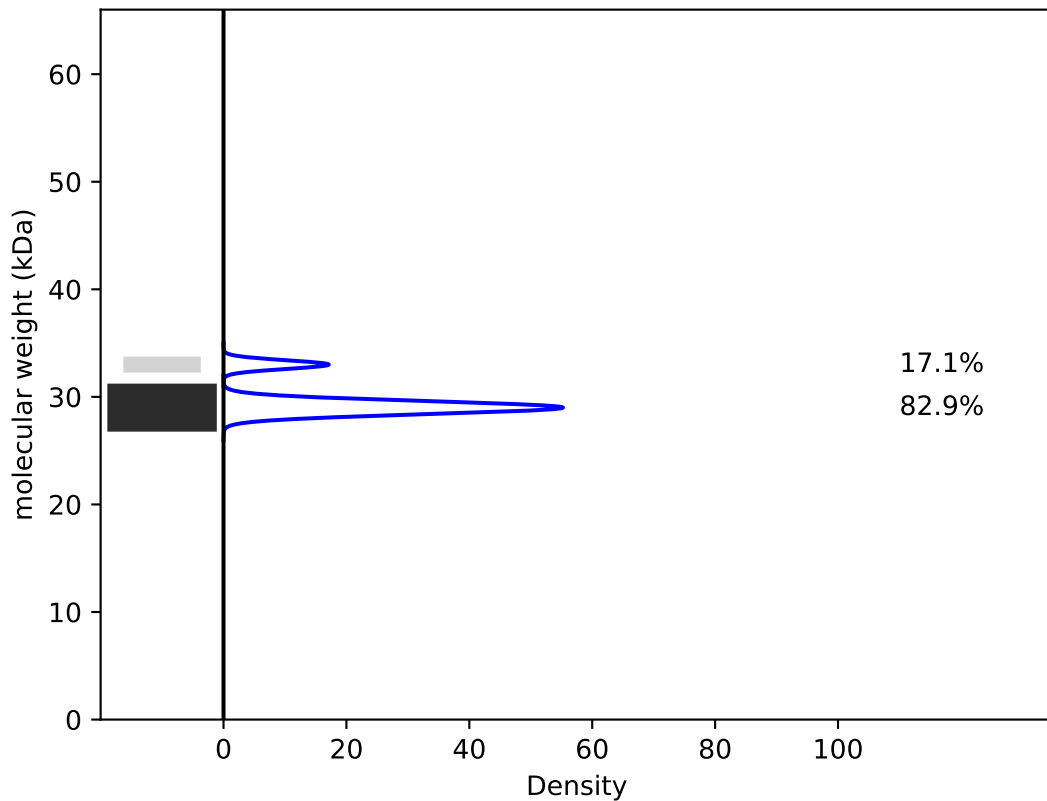

# Q9HA47

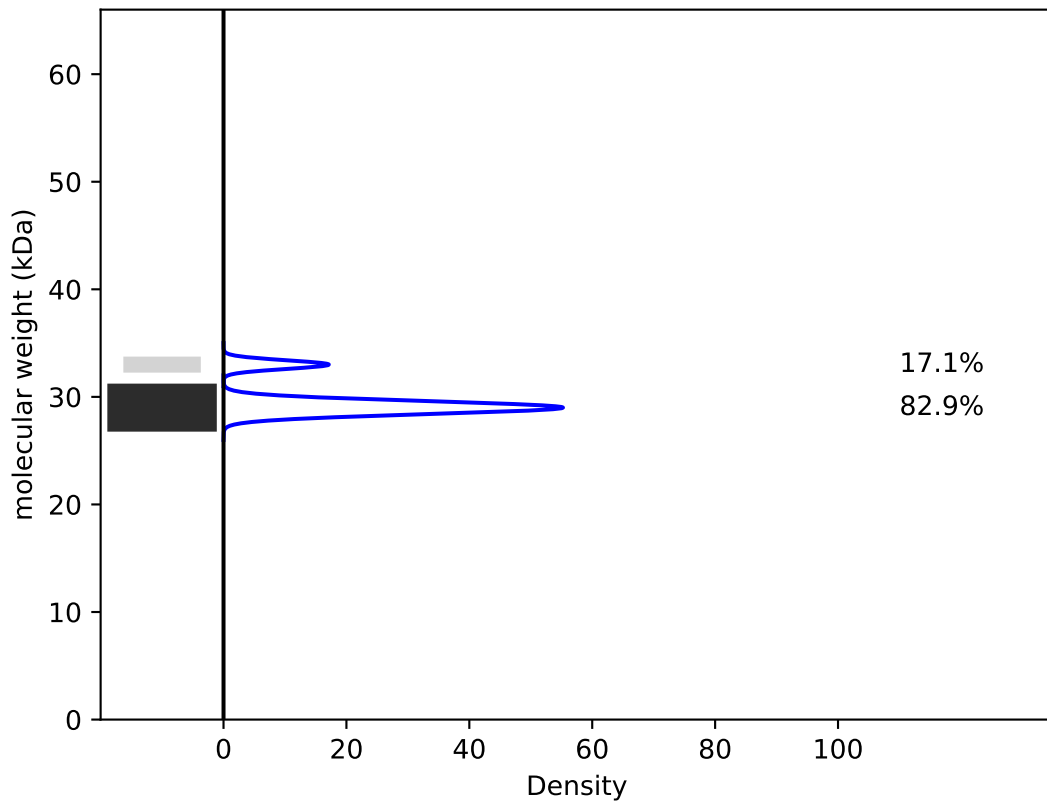

# Q9BZZ5

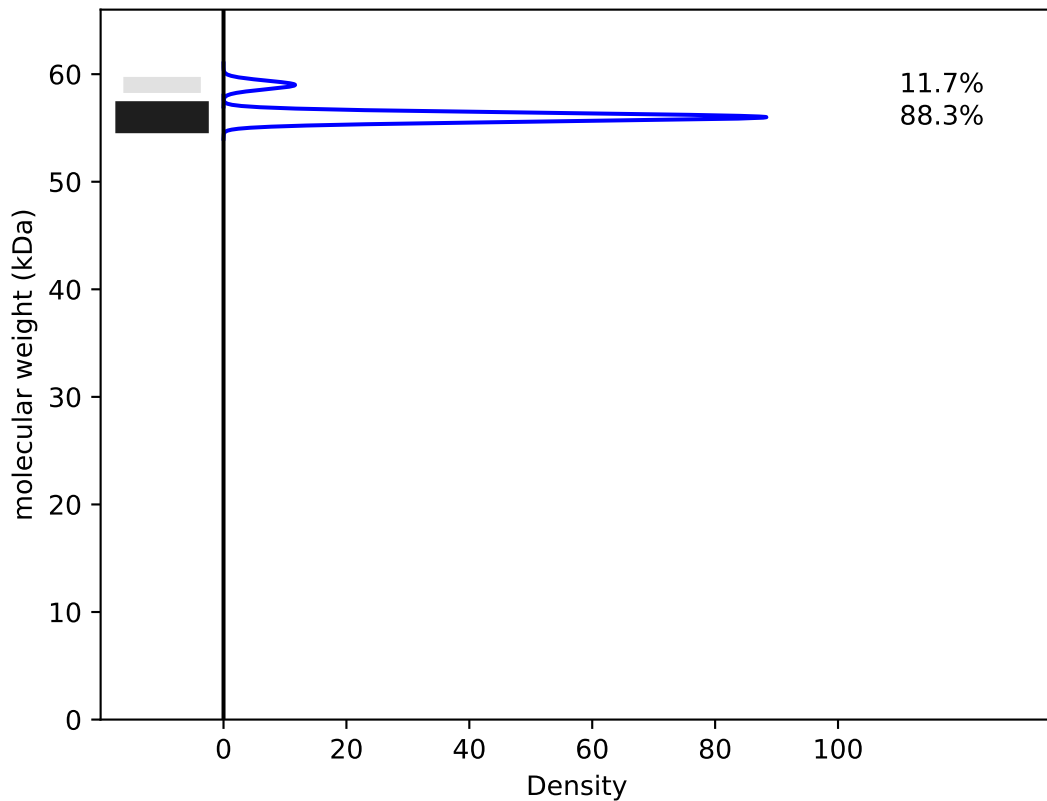

# Q9GZS3



# Q9GZT8

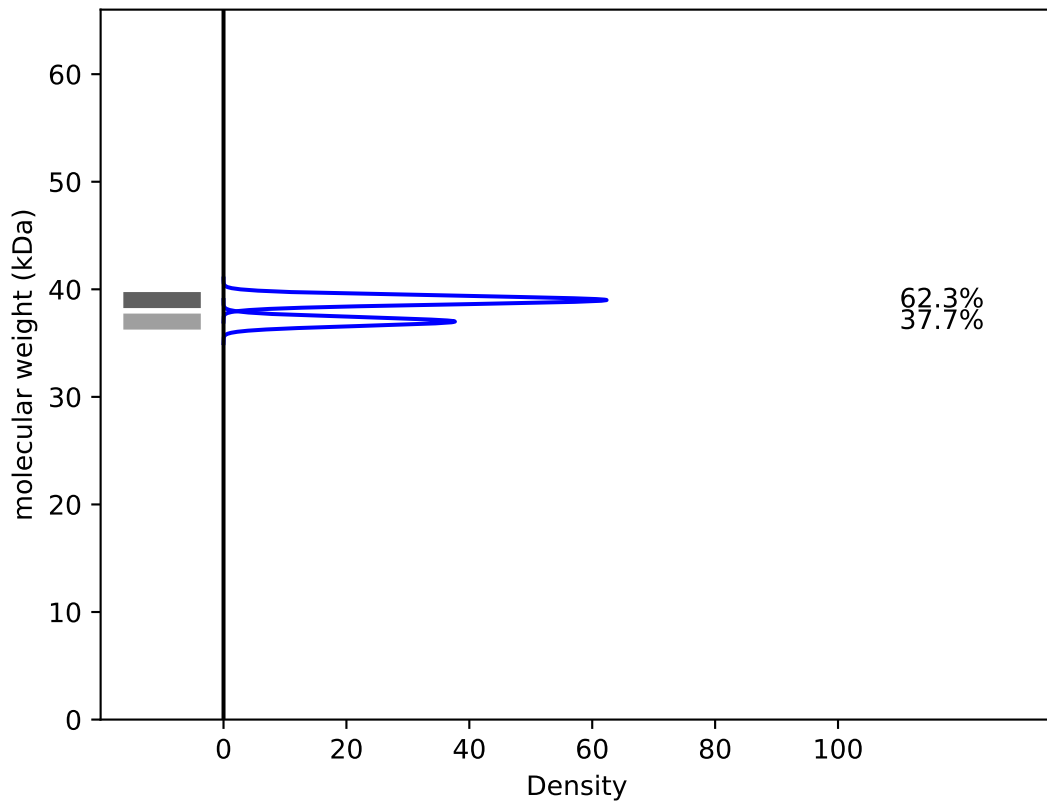

# Q9GZZ1

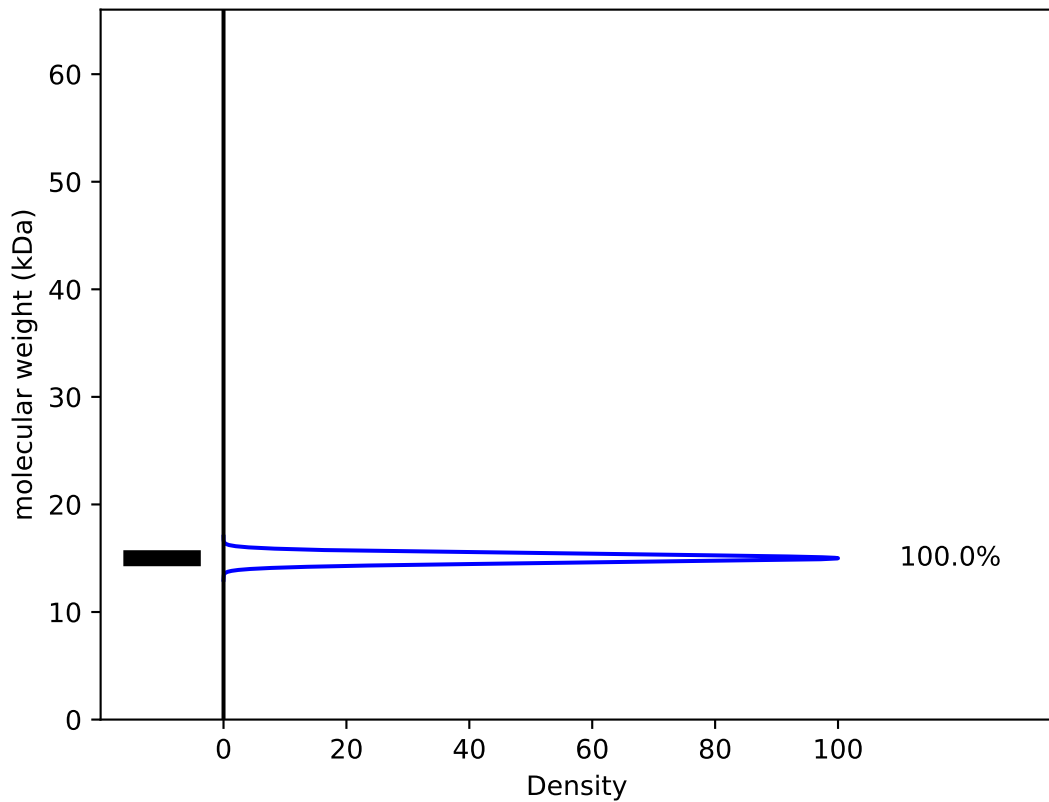

# Q9H074

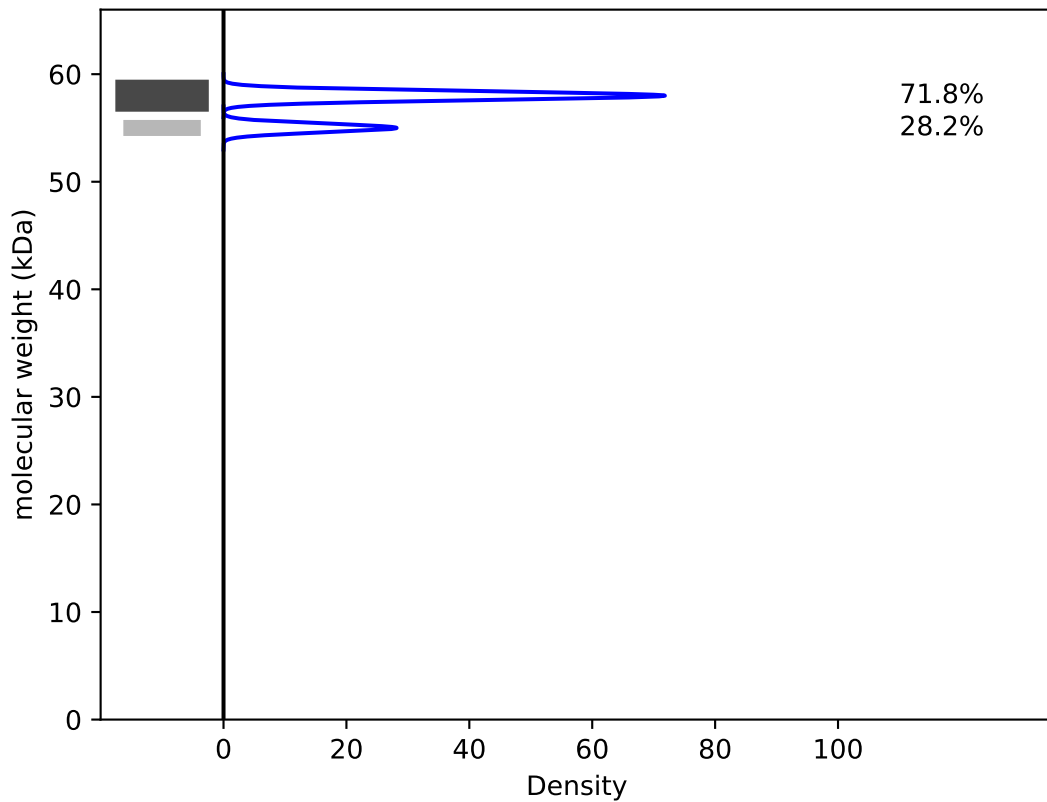



Q9H0C8



Q9H0S4



# Q9H0U4



# Q92928



# P59190



# Q9H0U6



# Q9H0V9



# Q9H2J4





# Q9H2P9



# Q9H2W6



# Q9H3N1

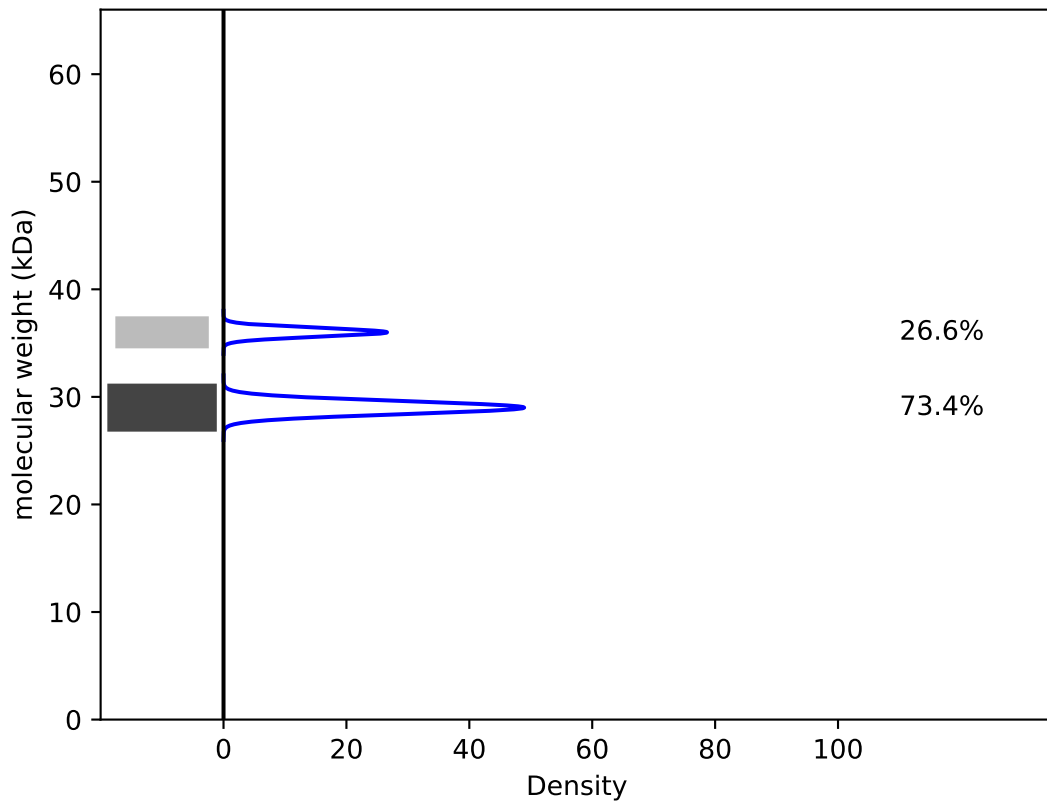

# Q9H488



# Q9H4I3

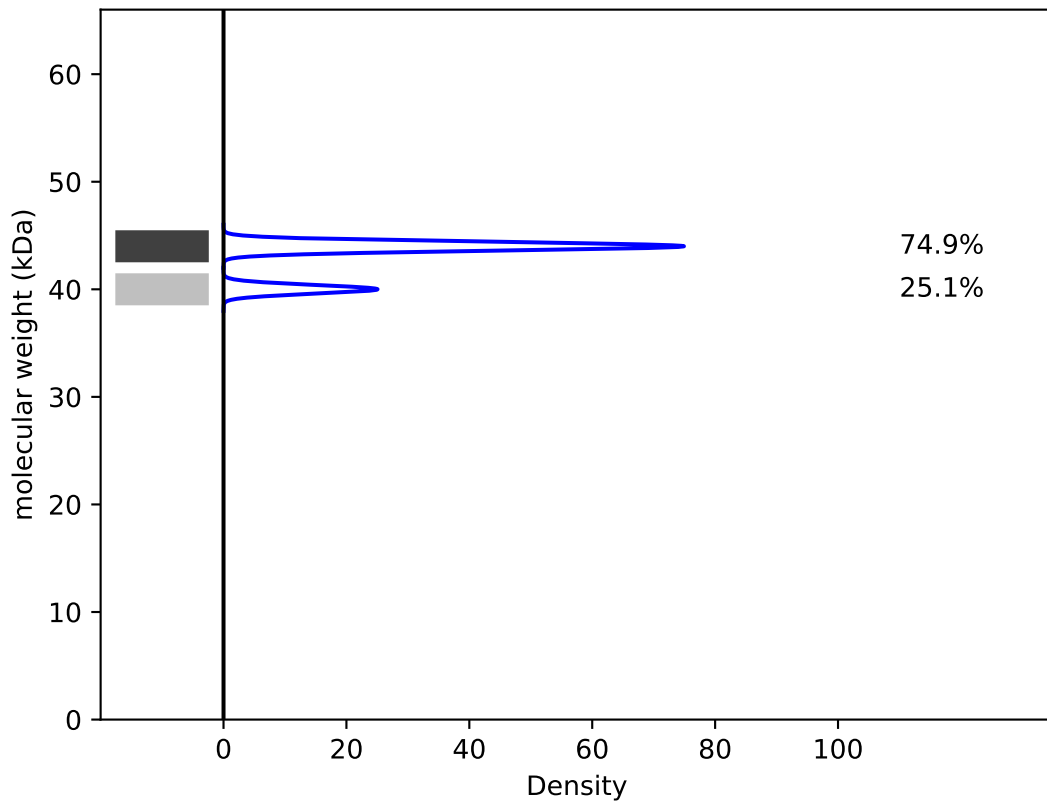

# Q9H4M9

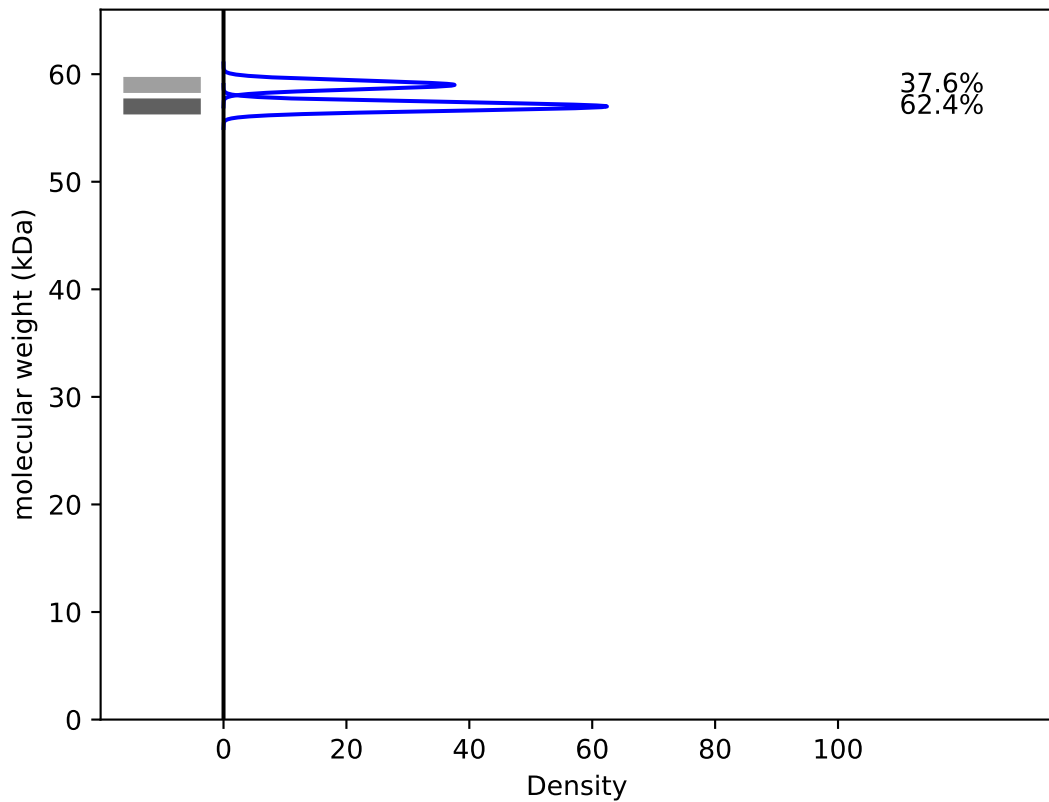

# Q9NZN3



# Q9H223





# Q9NZN4



# Q9H5Q4



# Q9H7B2



# Q9H7L9



# Q9H832

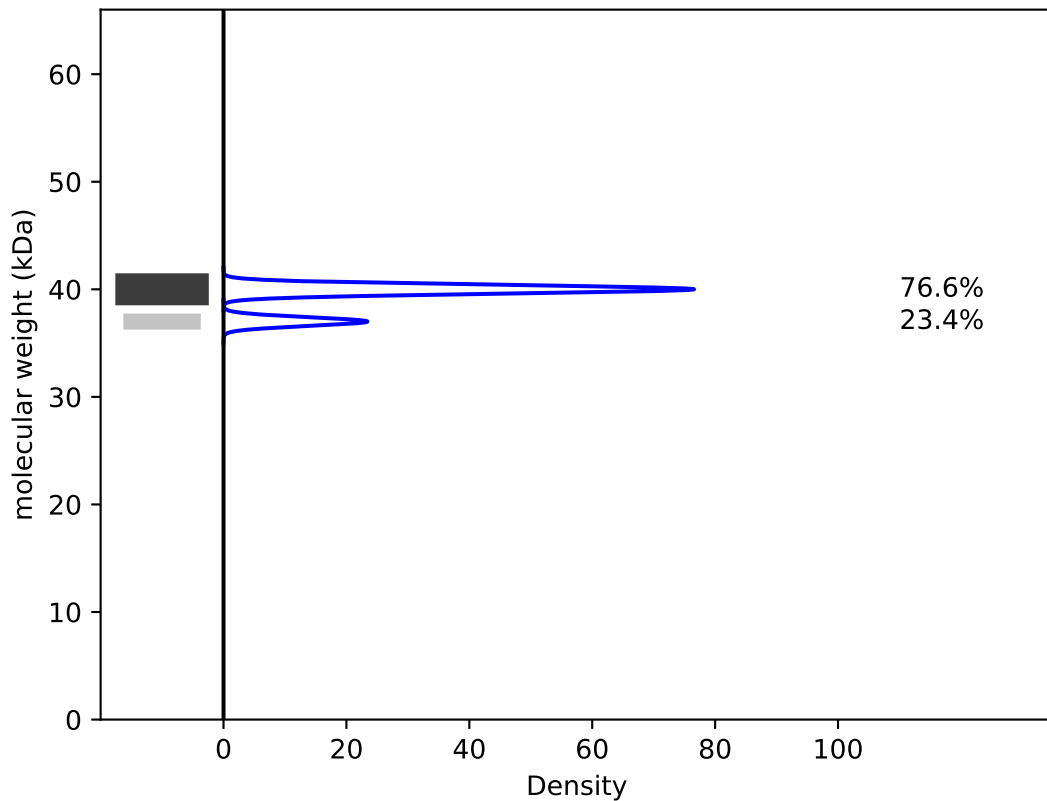

# Q9H871



# Q96G75

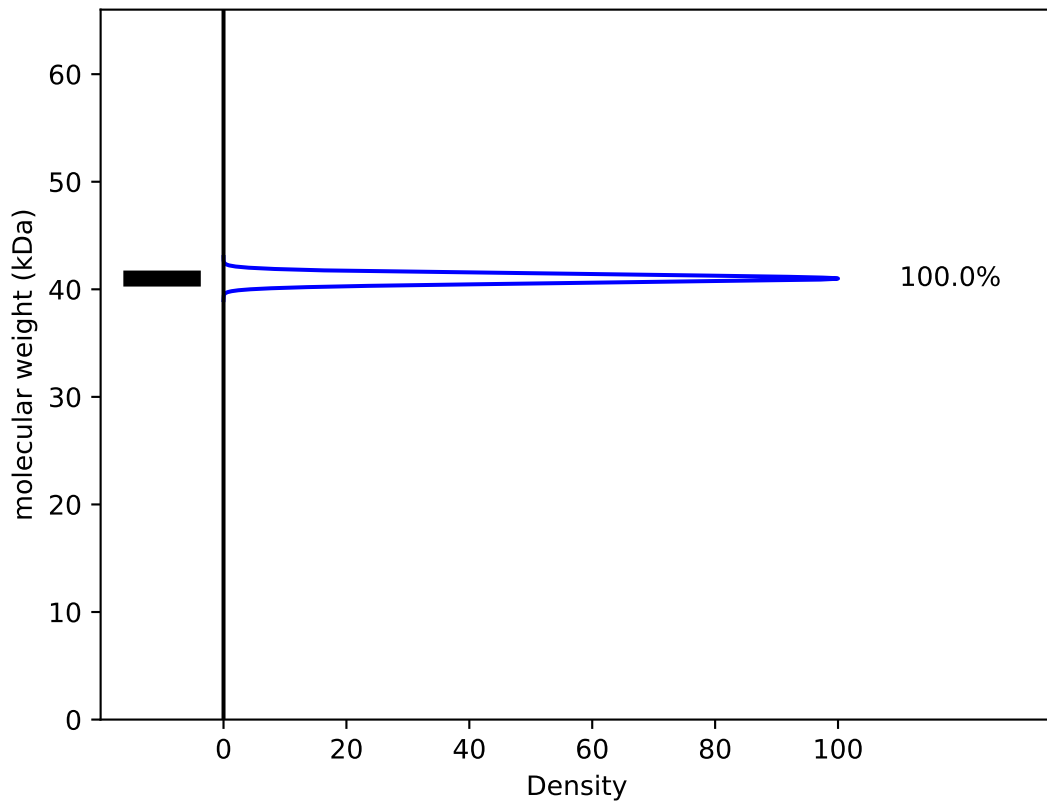

# Q9H936

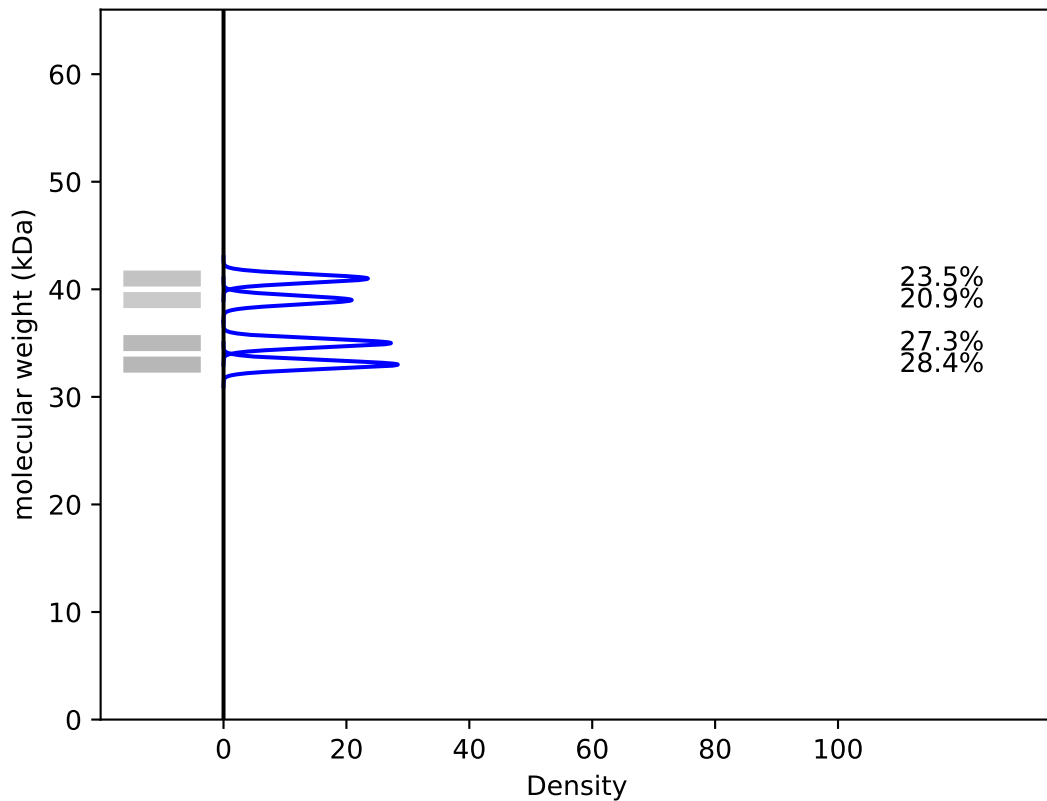



# Q9H1K4



# Q9H944



# Q9H9B4

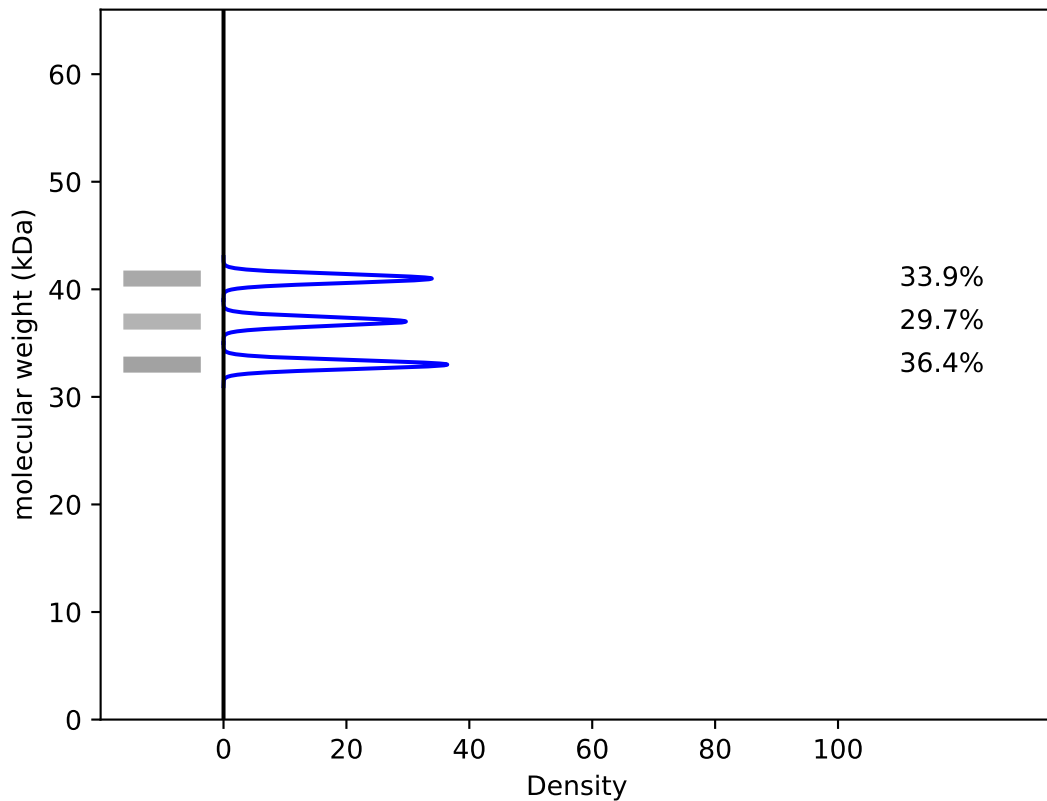

# Q9H9J2

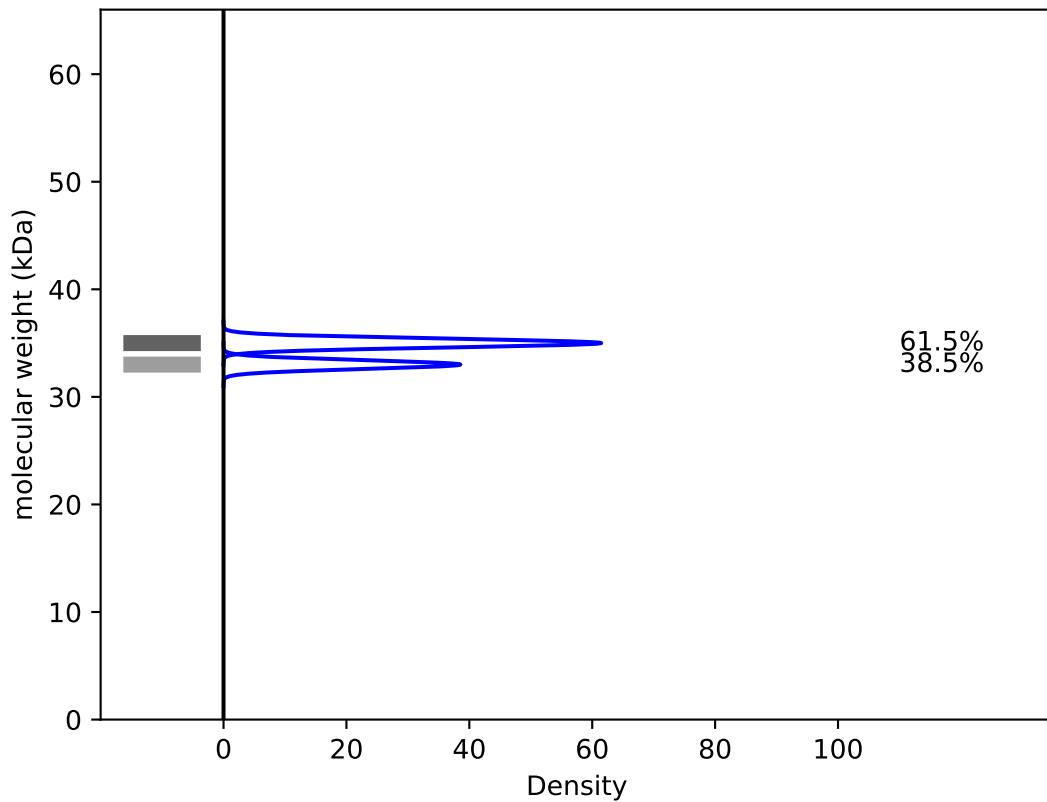

# Q9H9P8

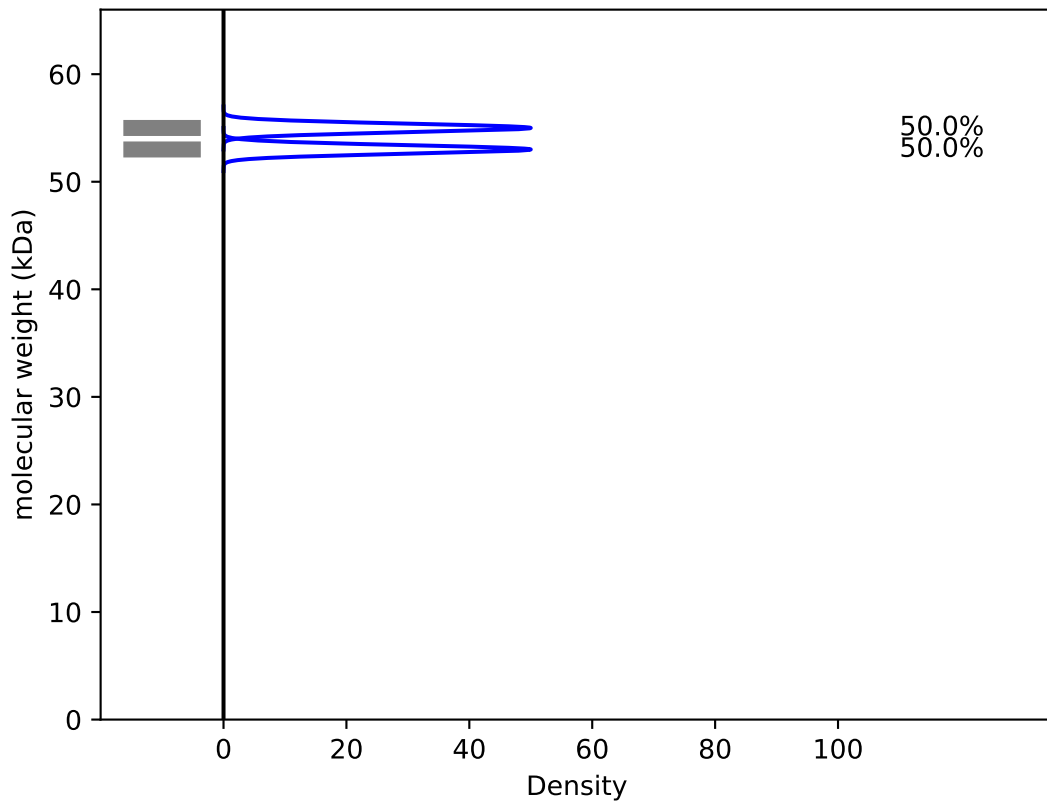

# Q9HAV7



# Q9HB07

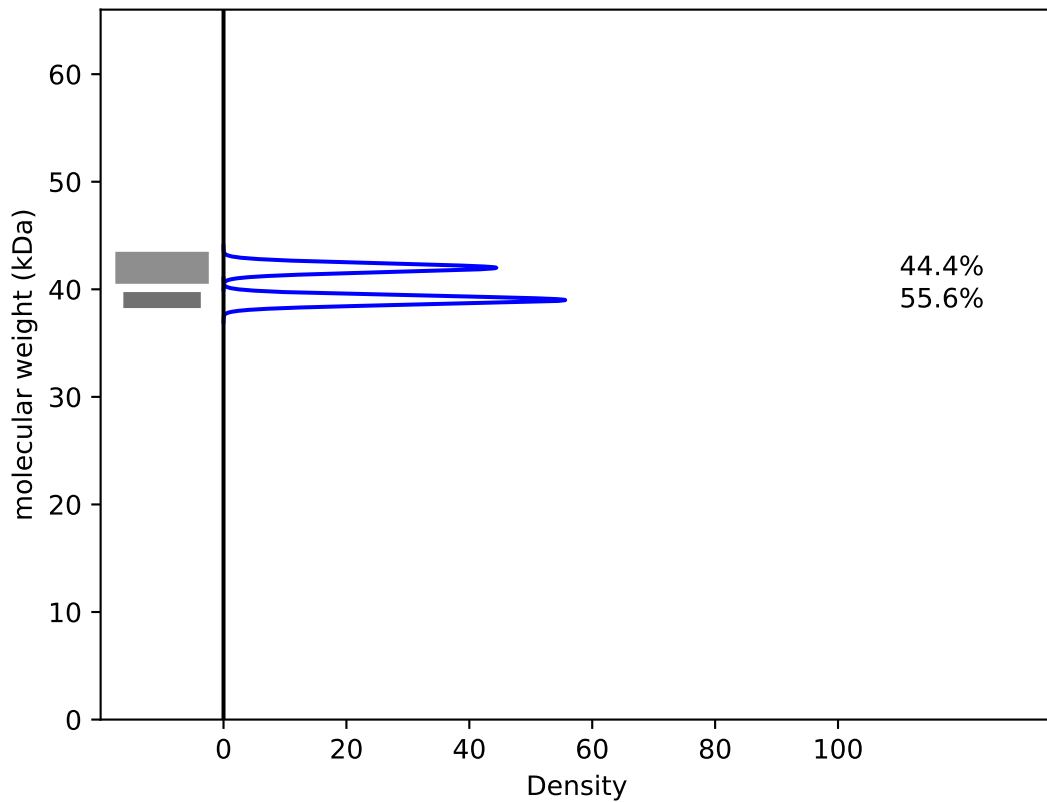

# Q9HB71

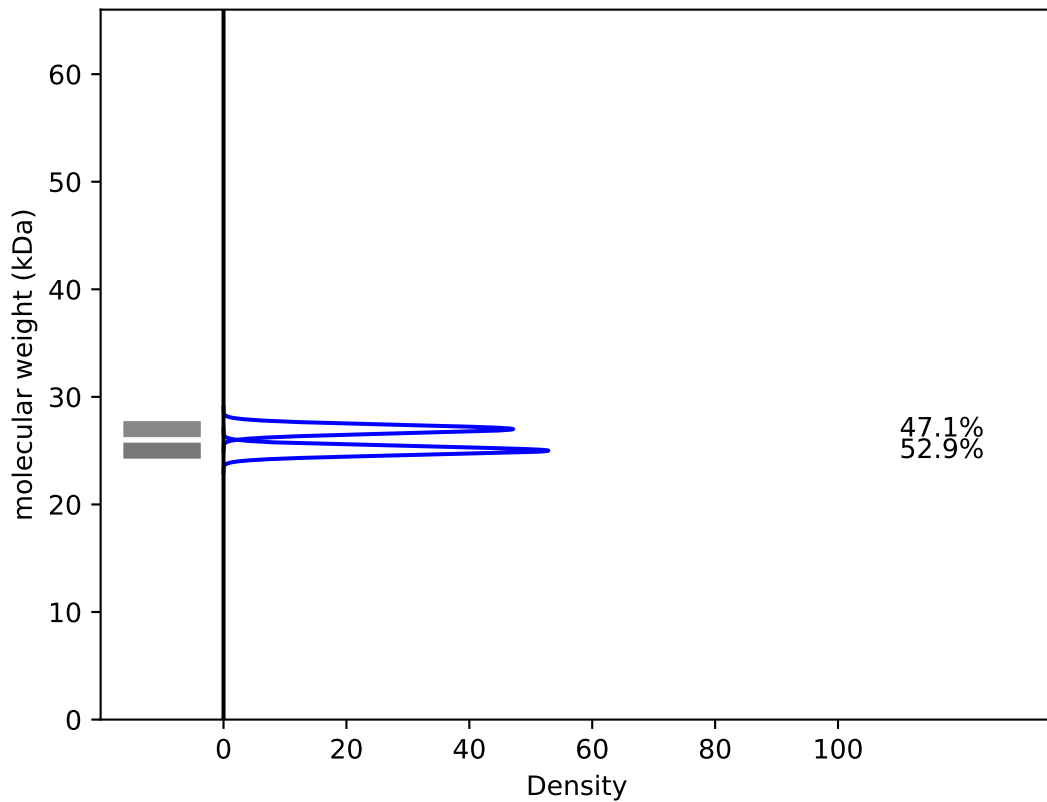



# Q9HBH0

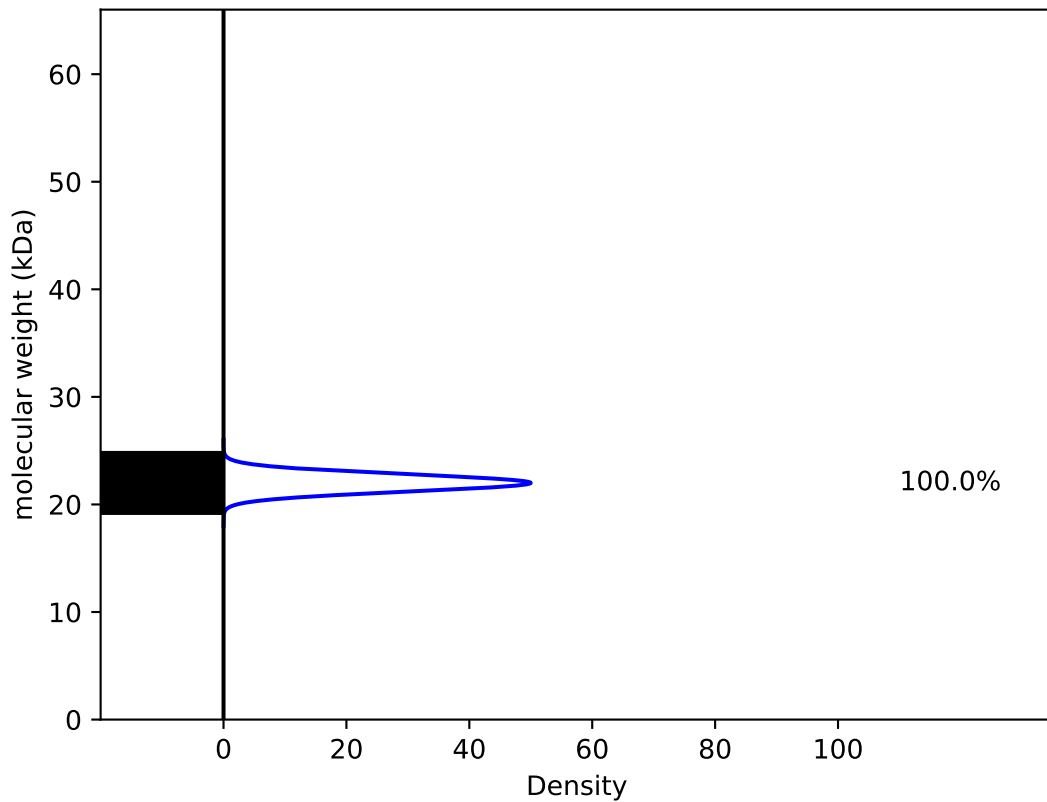

# Q9HBL8

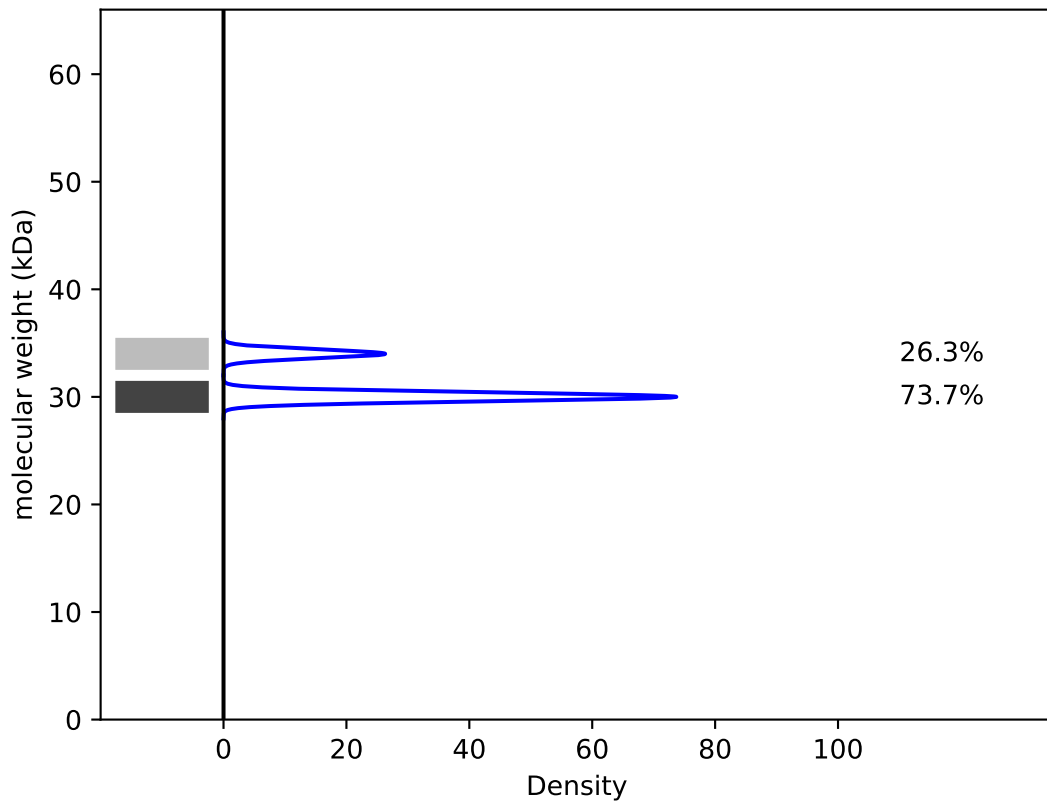

# Q9HC16



# Q9HC38



# Q9HCC0

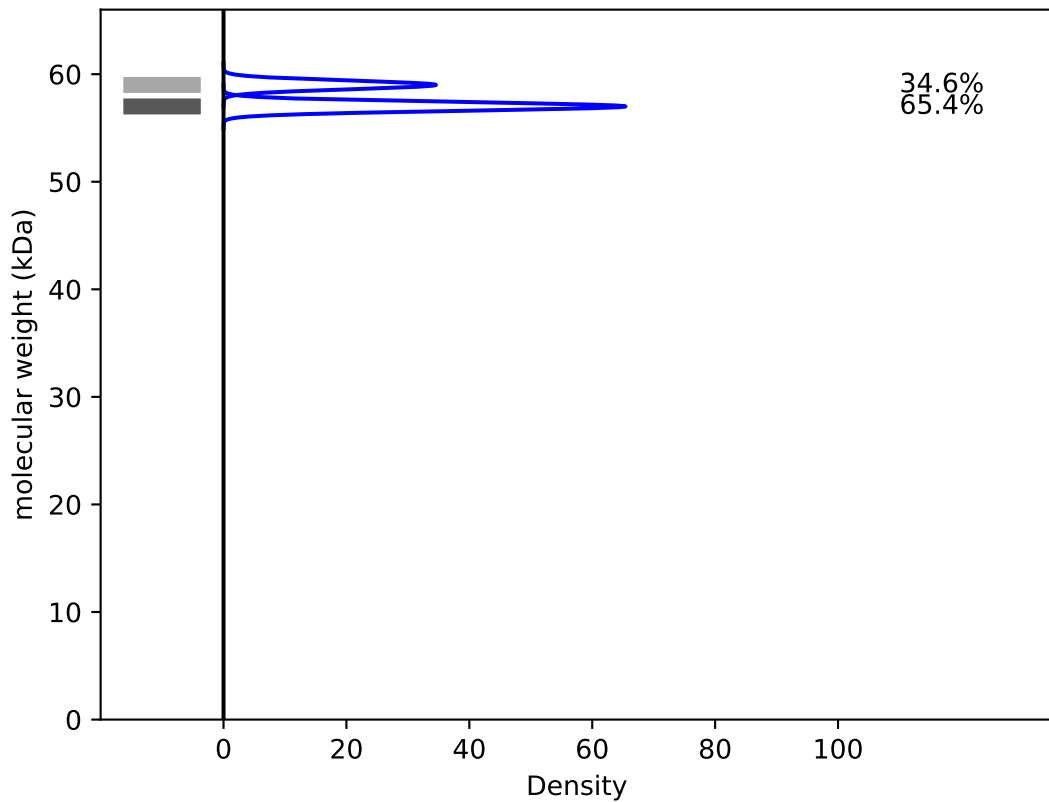

# Q9HCN4

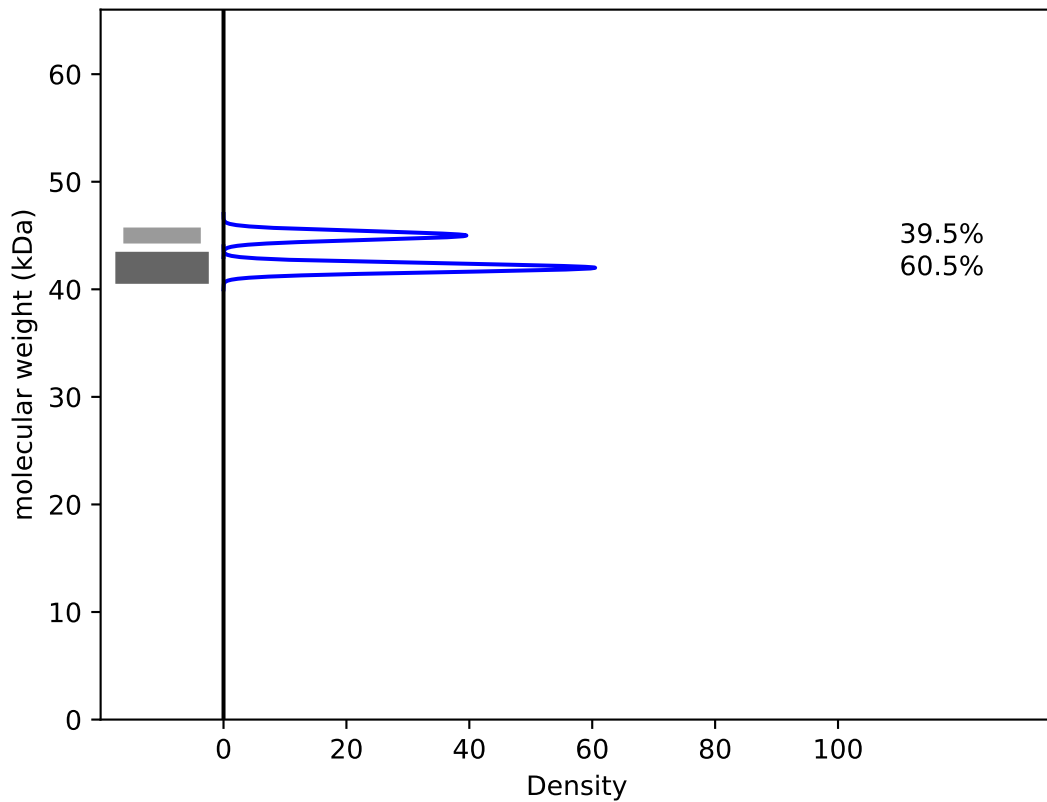

# Q9HDC9



# Q9NP72

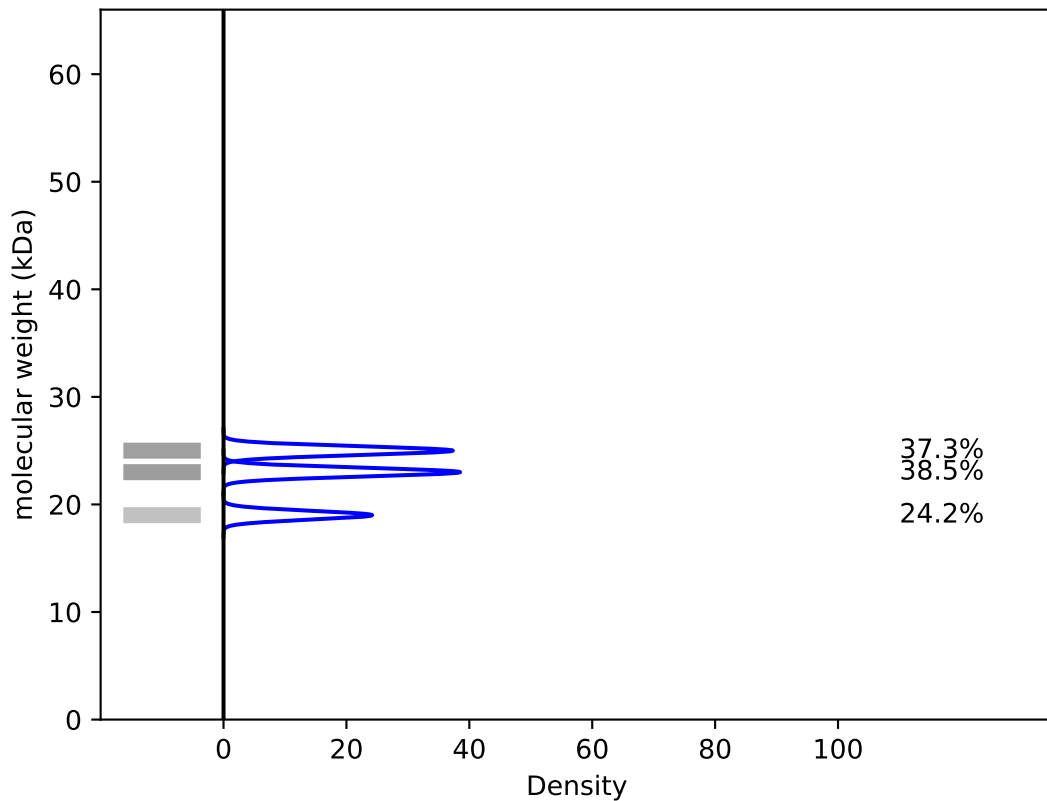



# Q9NP81



# Q9NPD3

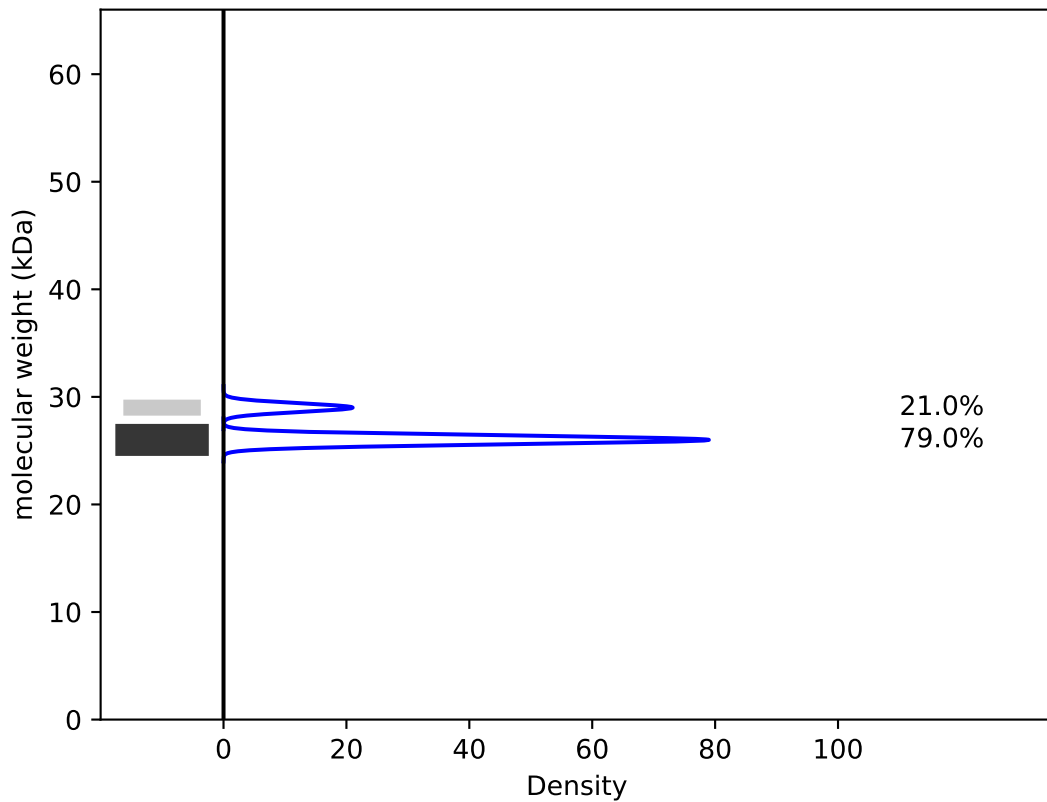

# Q9NPD8



# Q9NPF4



# Q9NVN3



# Q9NPQ8

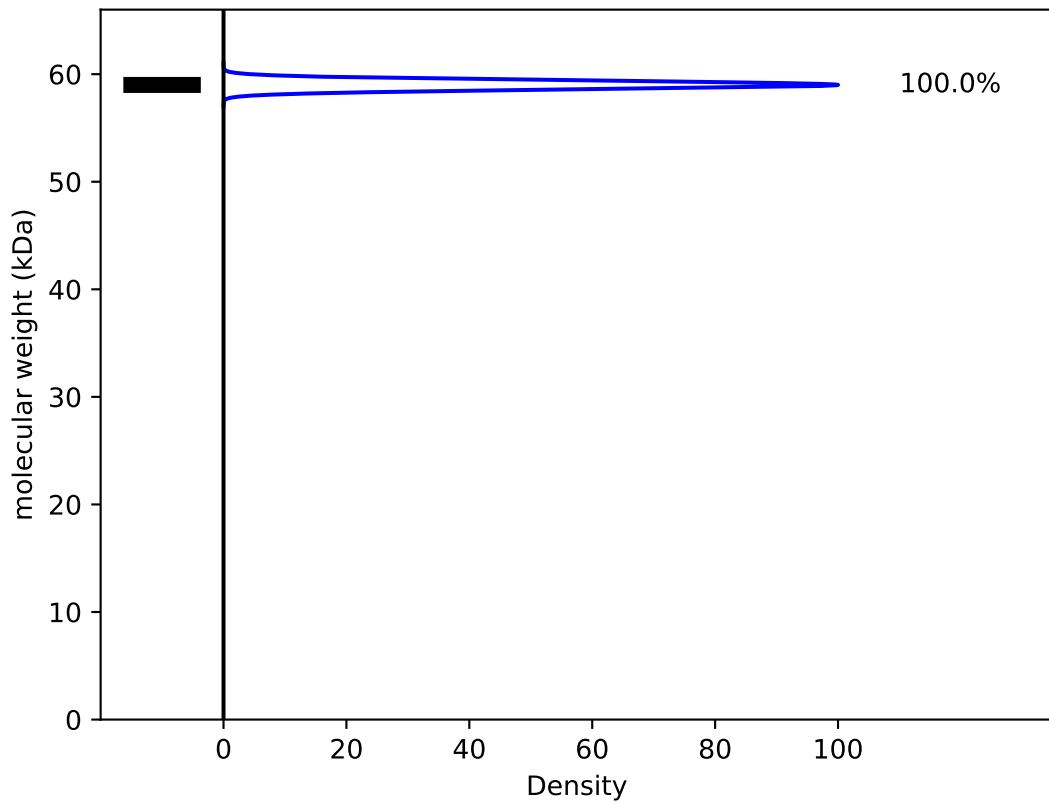

# Q9NQ50



# Q9NQ88





# Q9NQG5



# Q9NQH7



# Q9NQR4

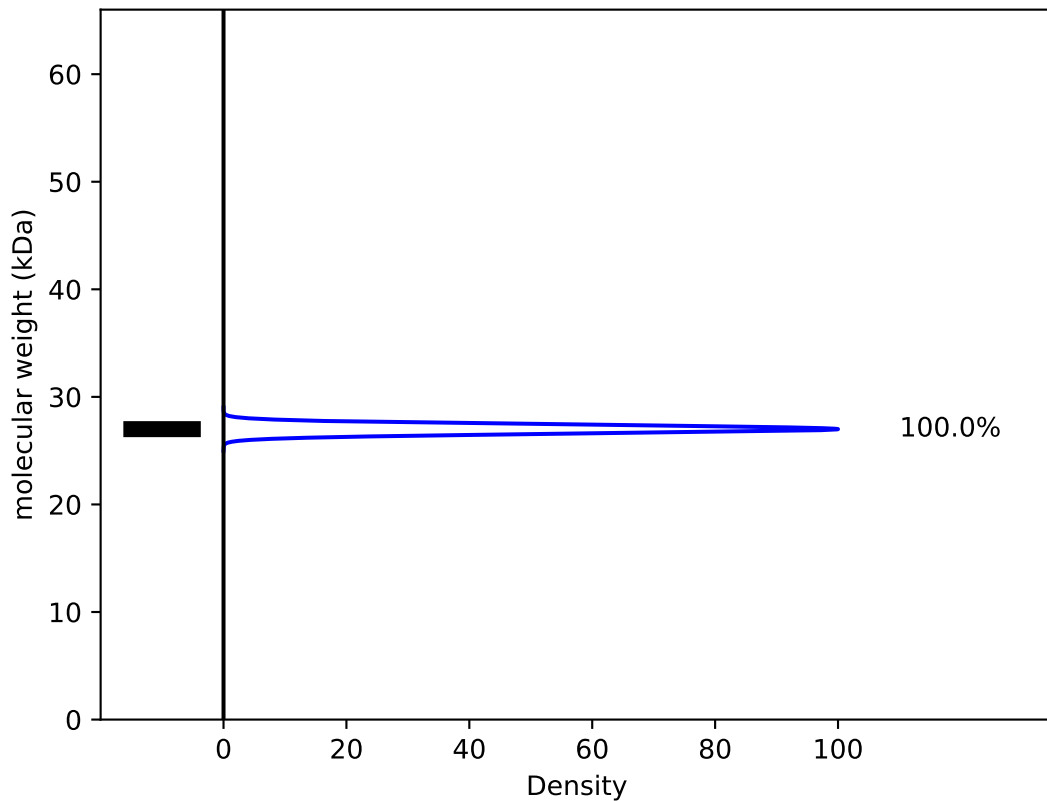

# Q9NQT5

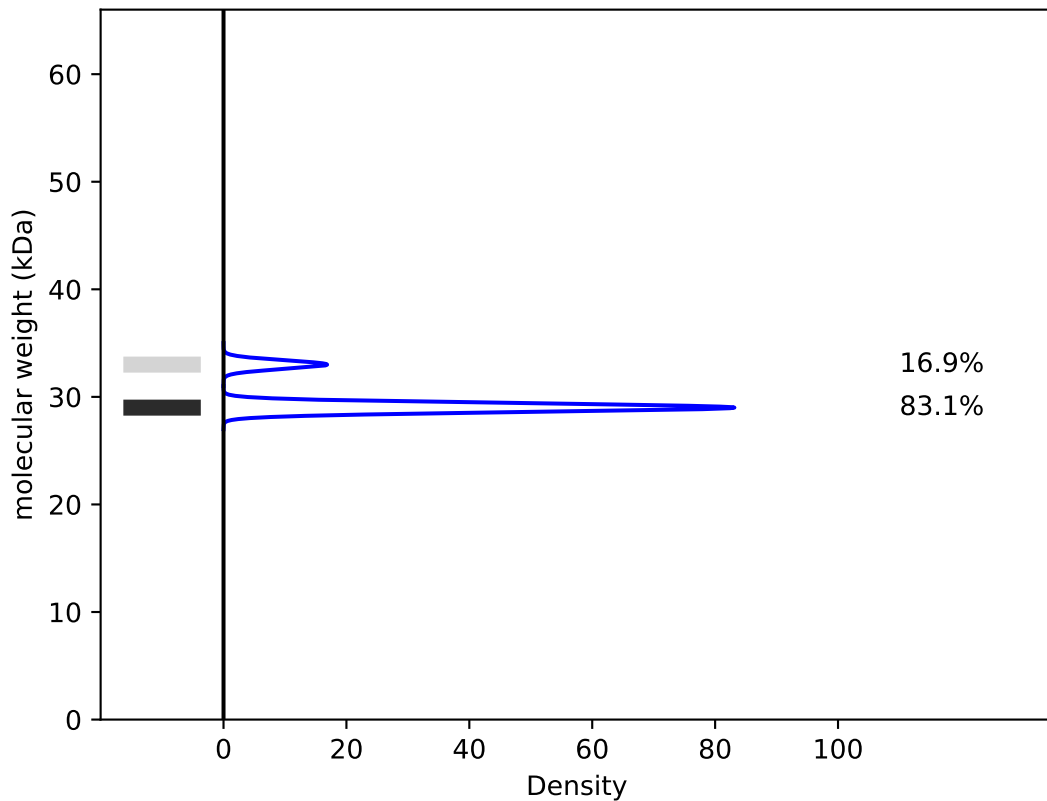

# Q9NR28



# Q9NR31

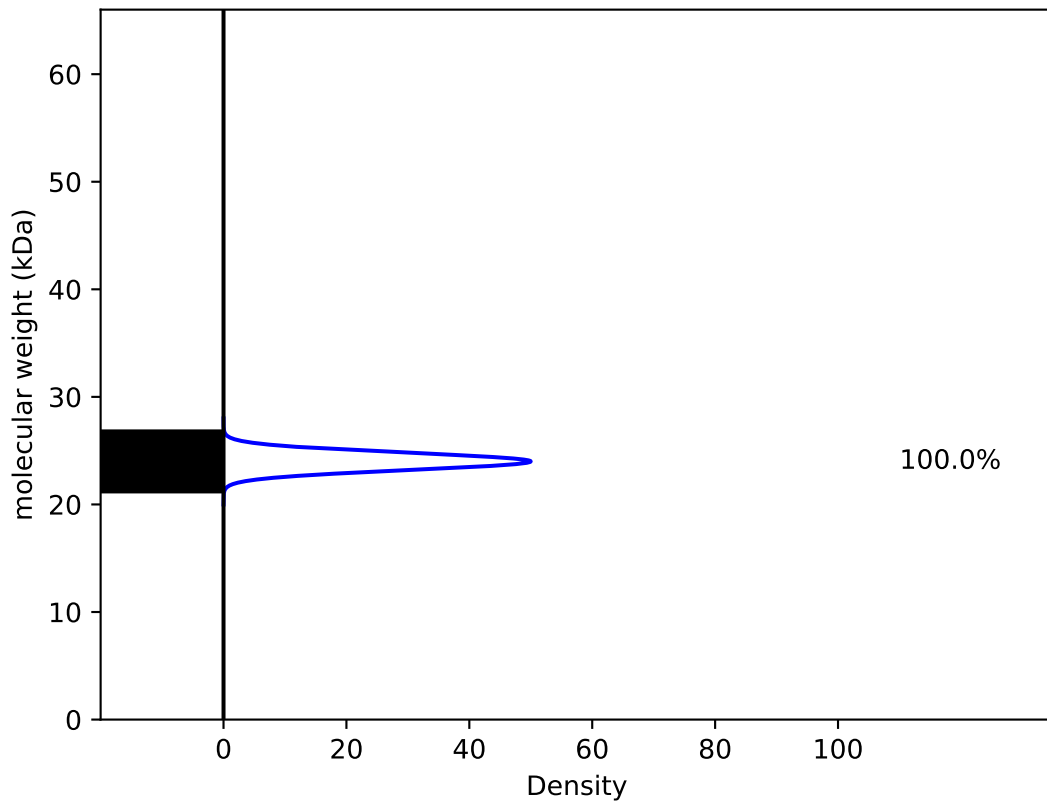

# Q9NR45

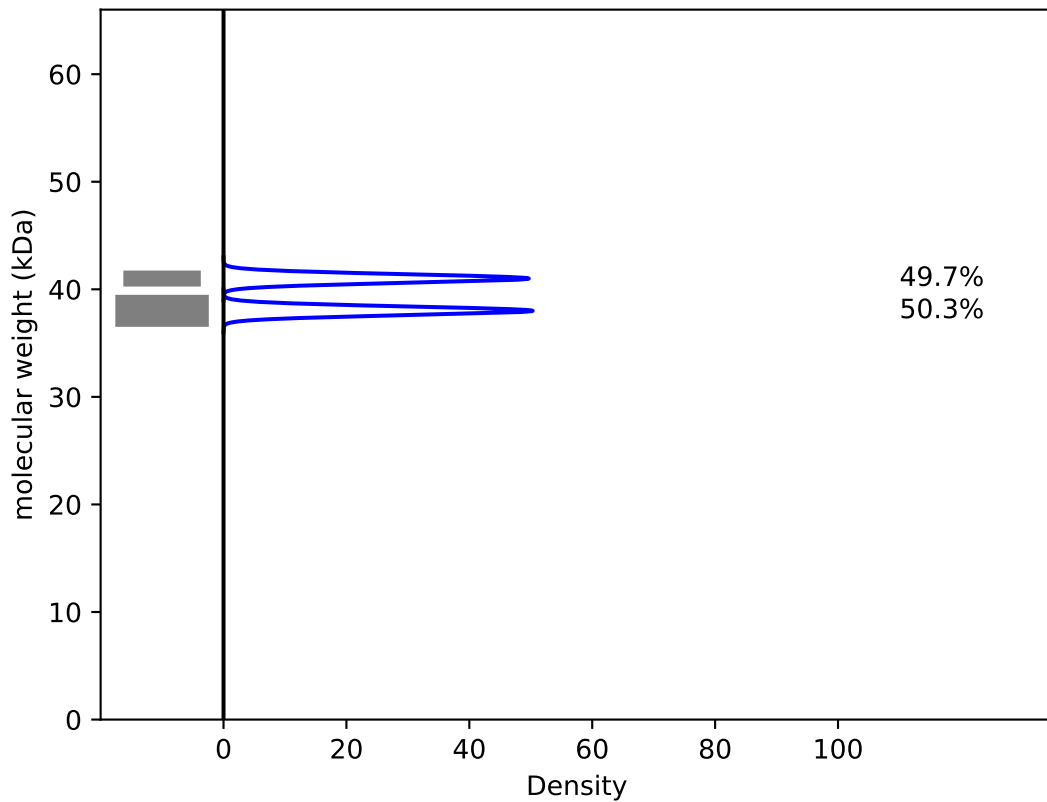

# Q9NR56





# Q9NRG7



# Q9NRN7

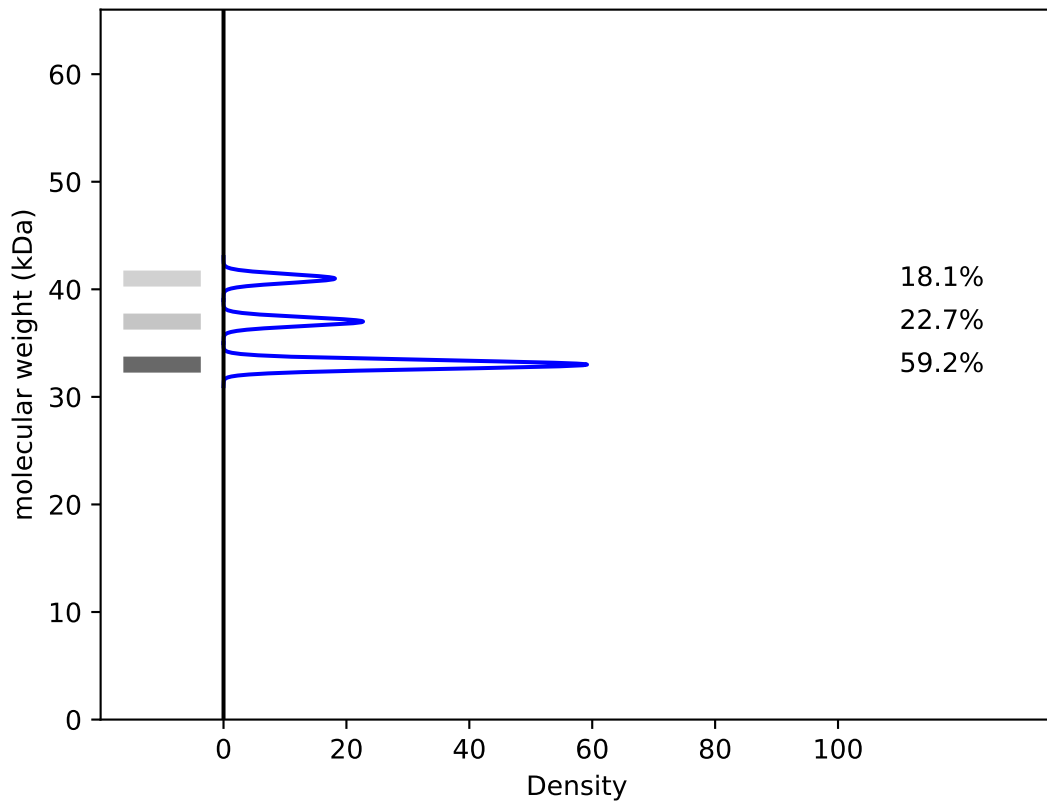

# Q9NRV9

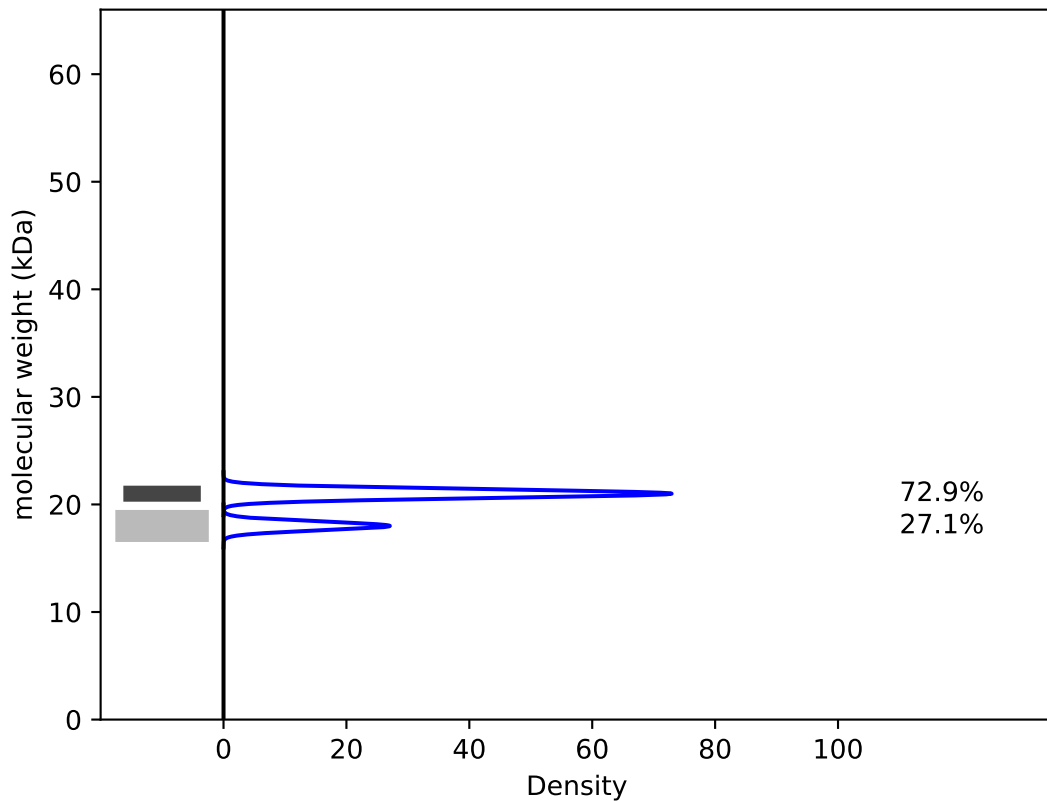

# Q9NS69

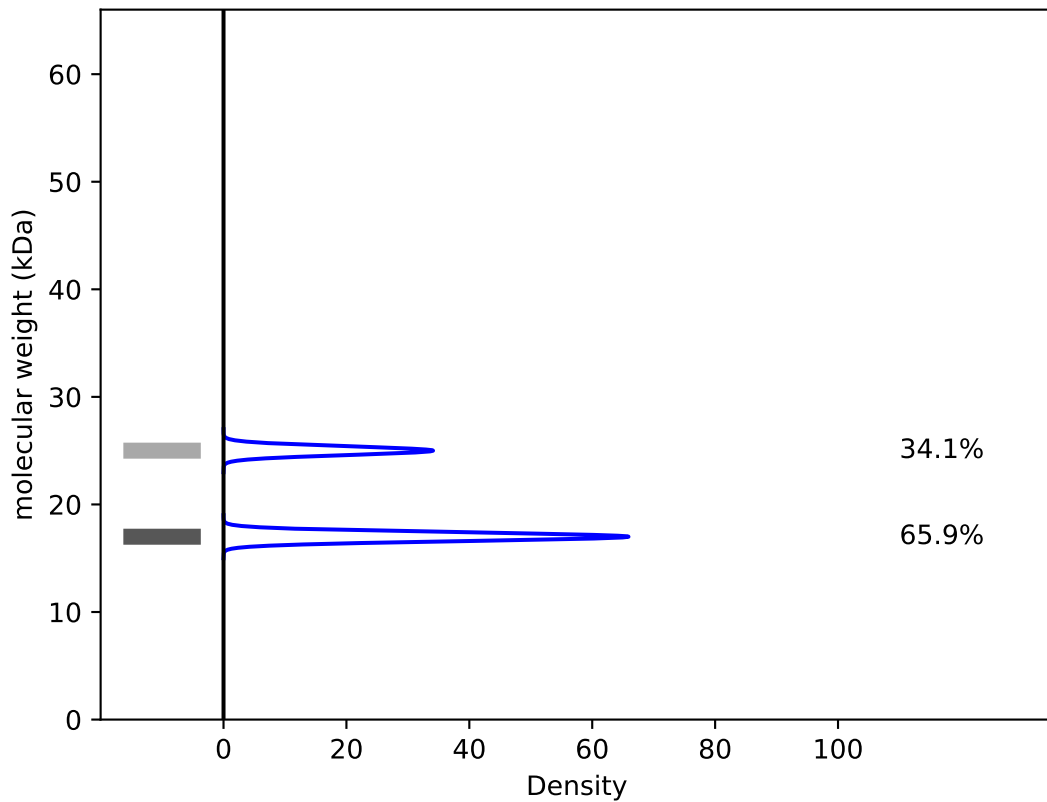

# Q9NSC5



# Q9NT62



# Q9NTK5

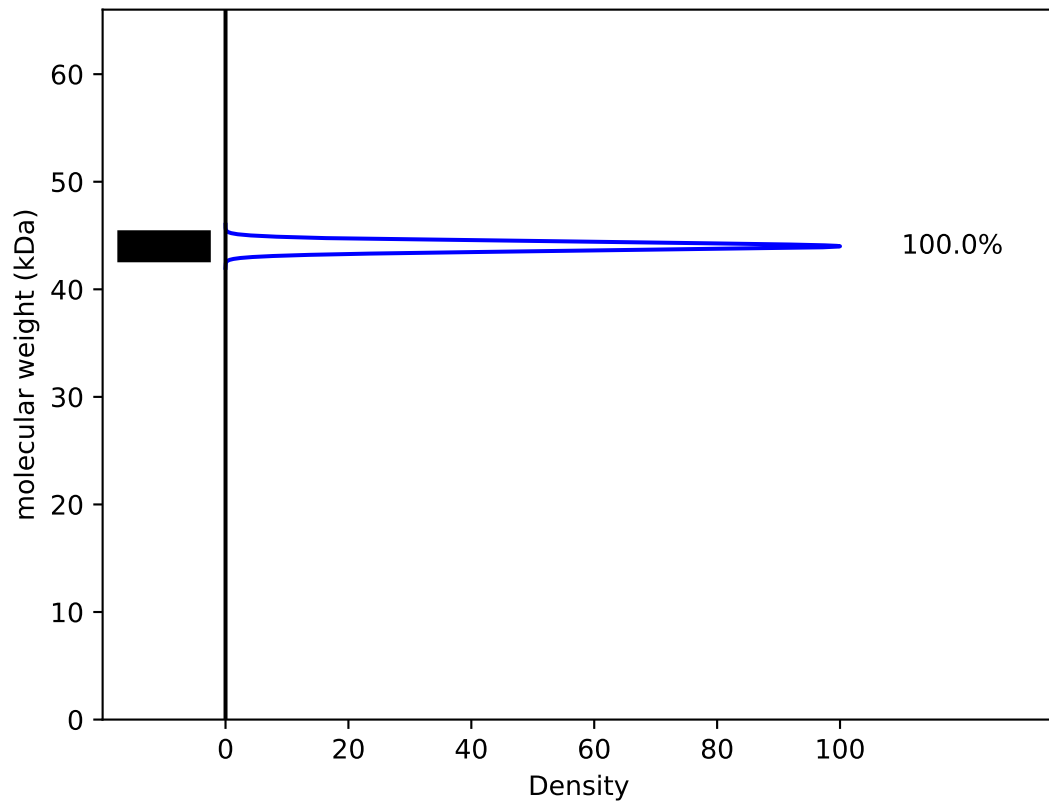

# Q9NTX5





# Q9NUI1

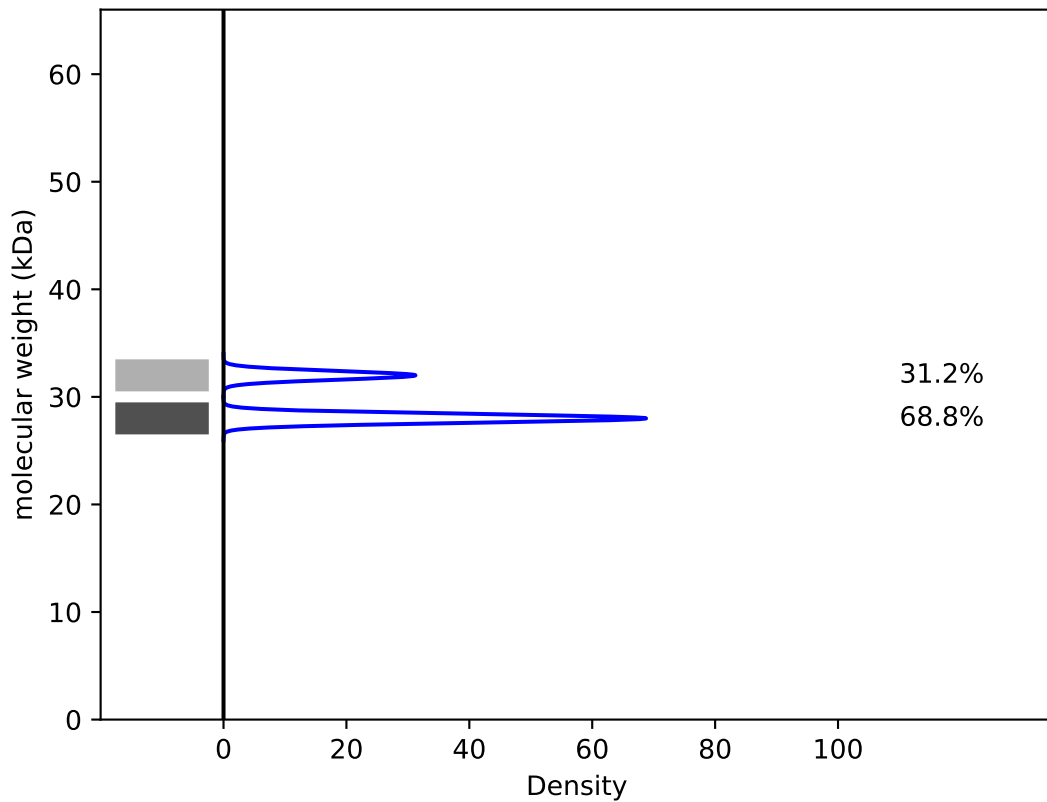

# Q9NUL7

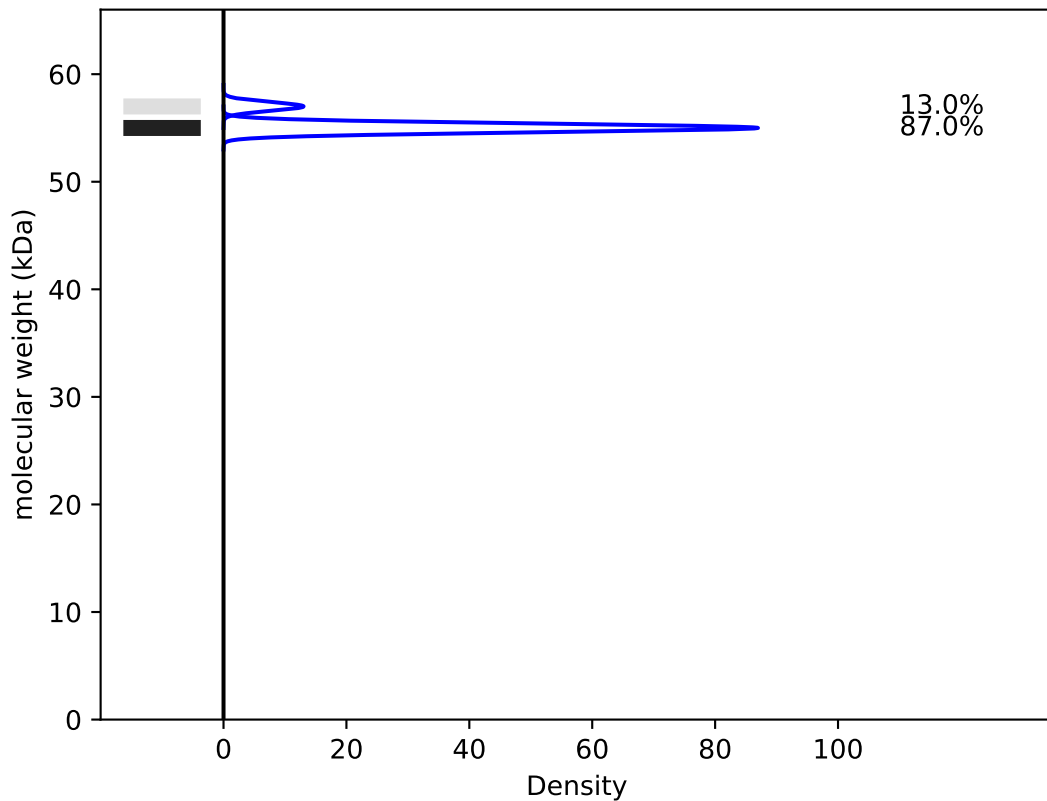

# Q9NUQ9

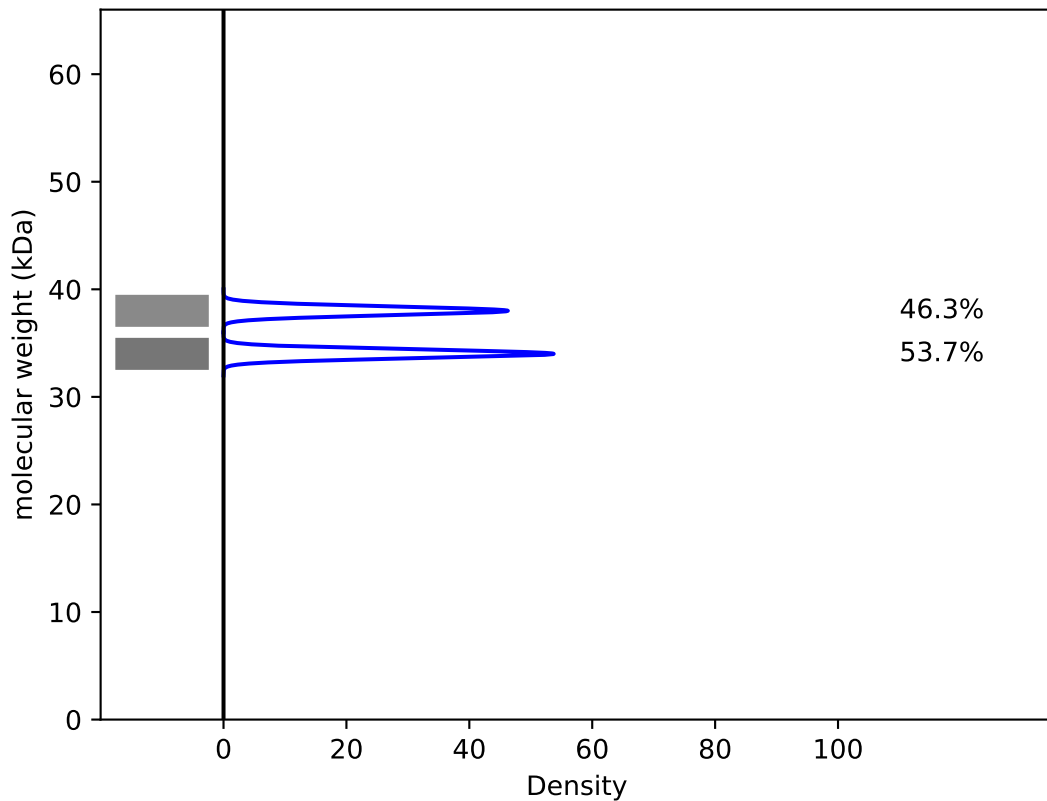

# Q9H0Q0



# Q9NUU7

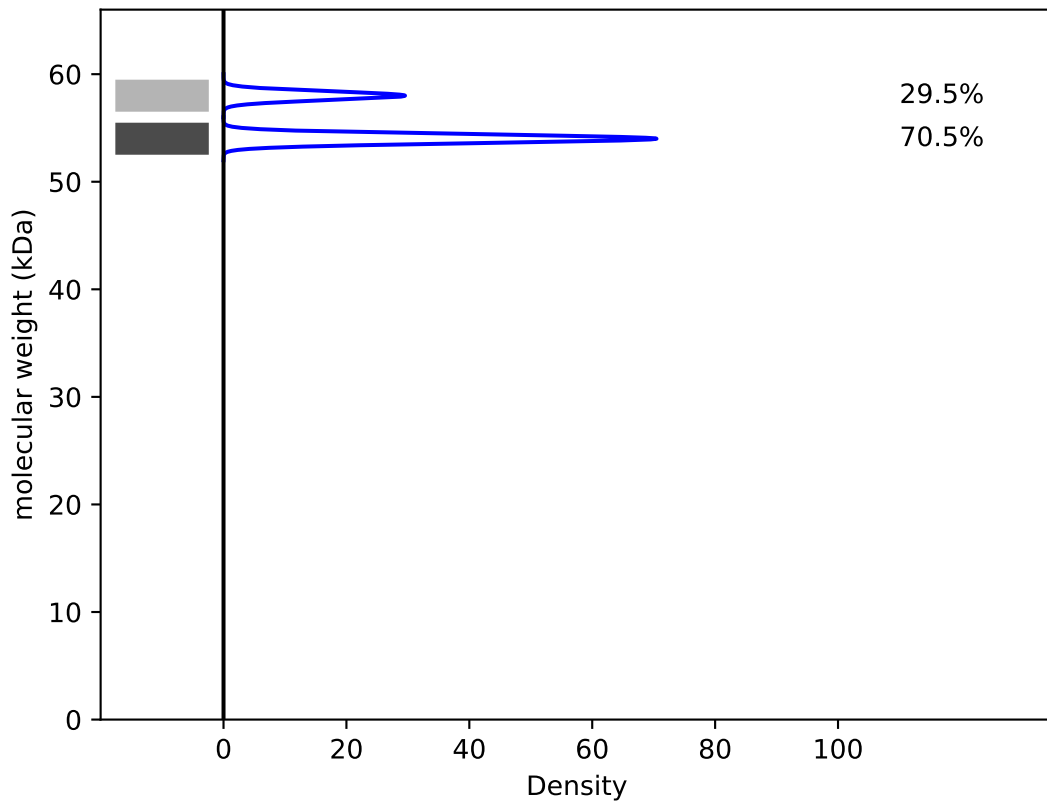

# Q9UMR2

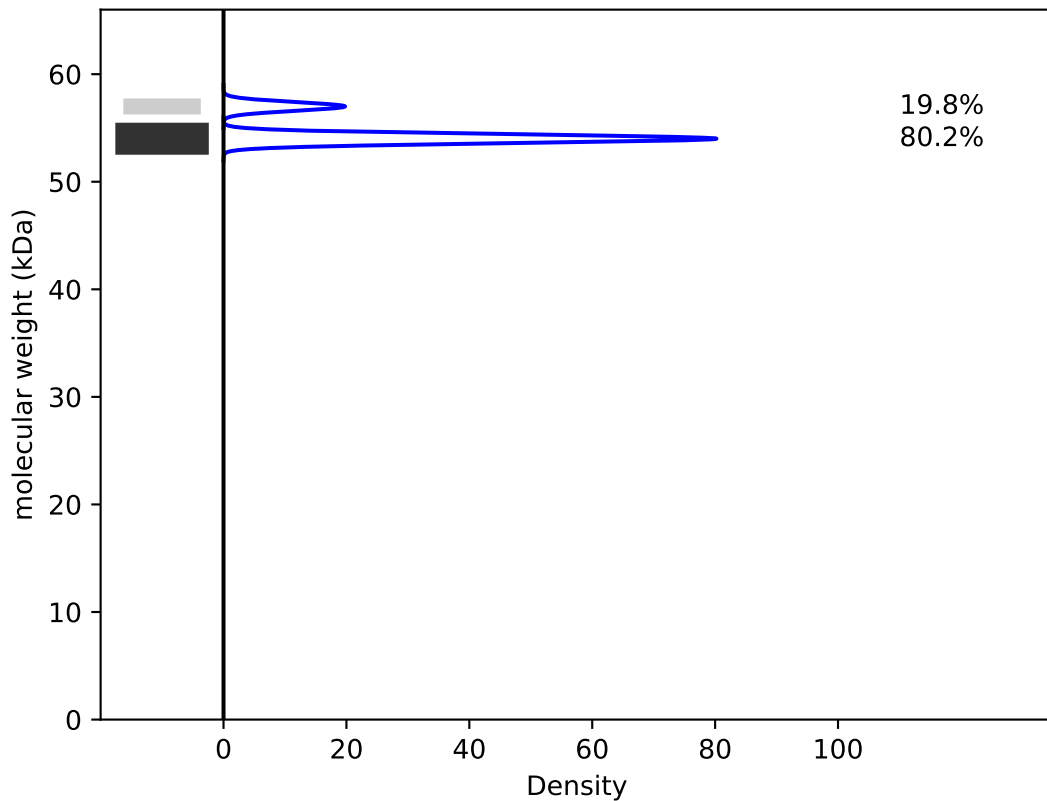

# Q9UHL0



# Q9NV31

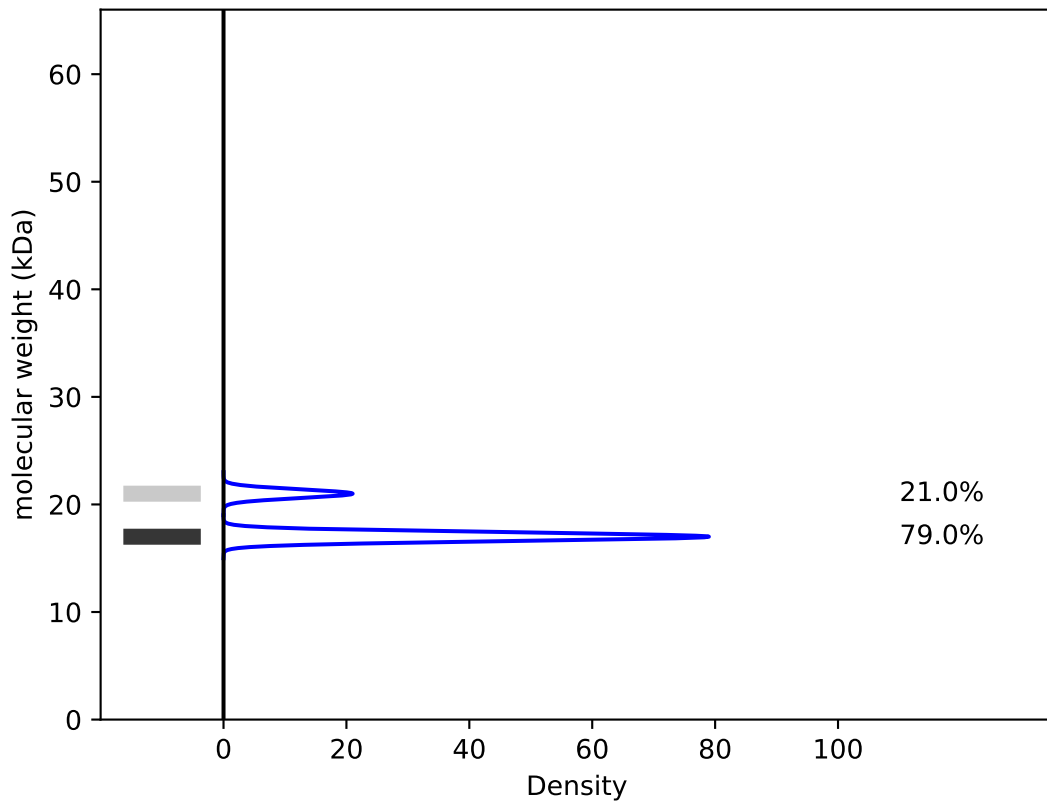



# Q9NVD7



# Q9HBI1



# Q9NVJ2

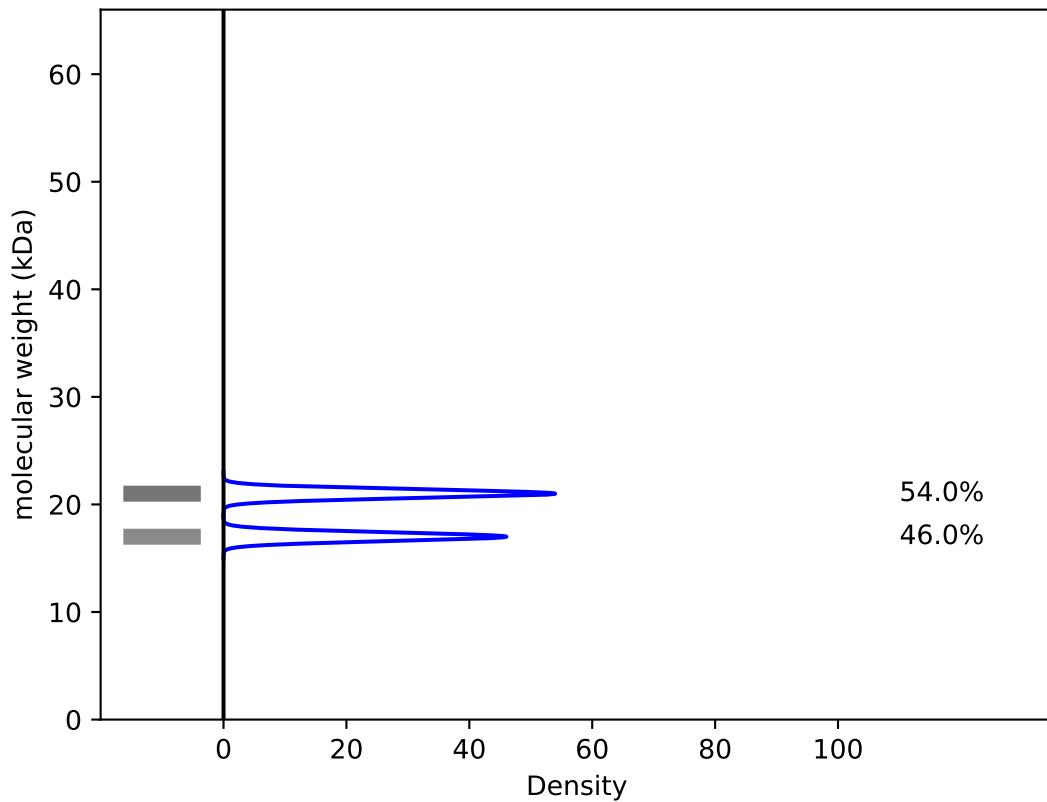

# Q9NVZ3



# Q9NWS0

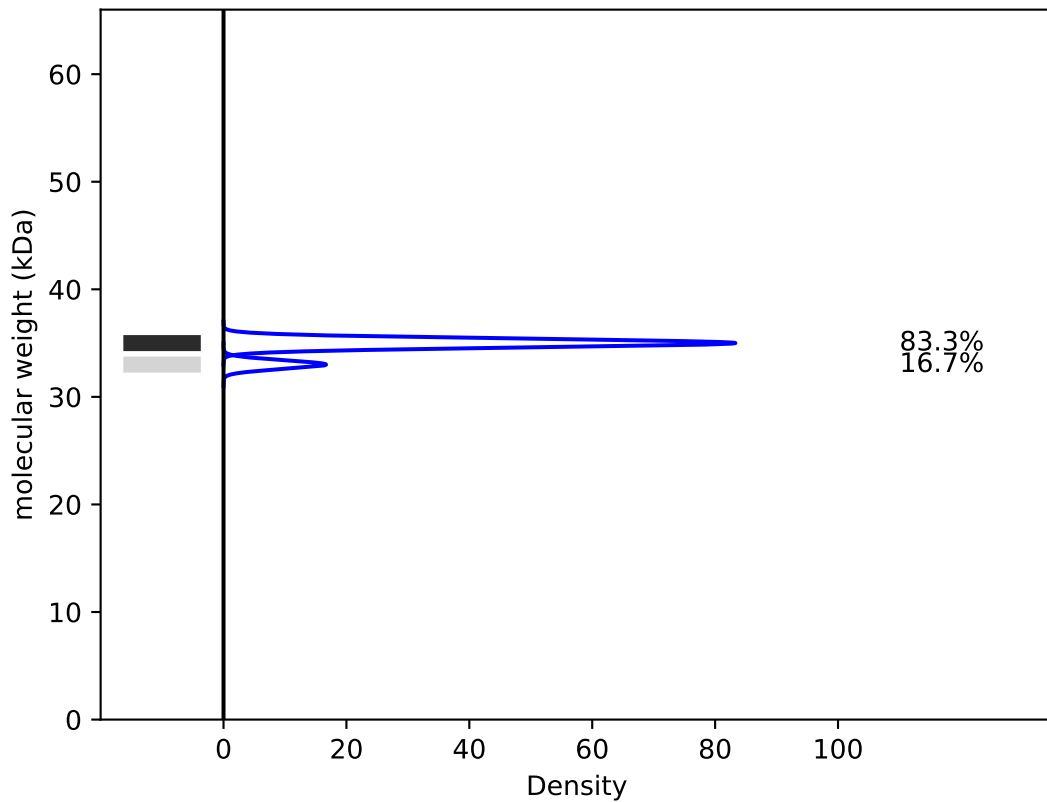

# Q9NWT1

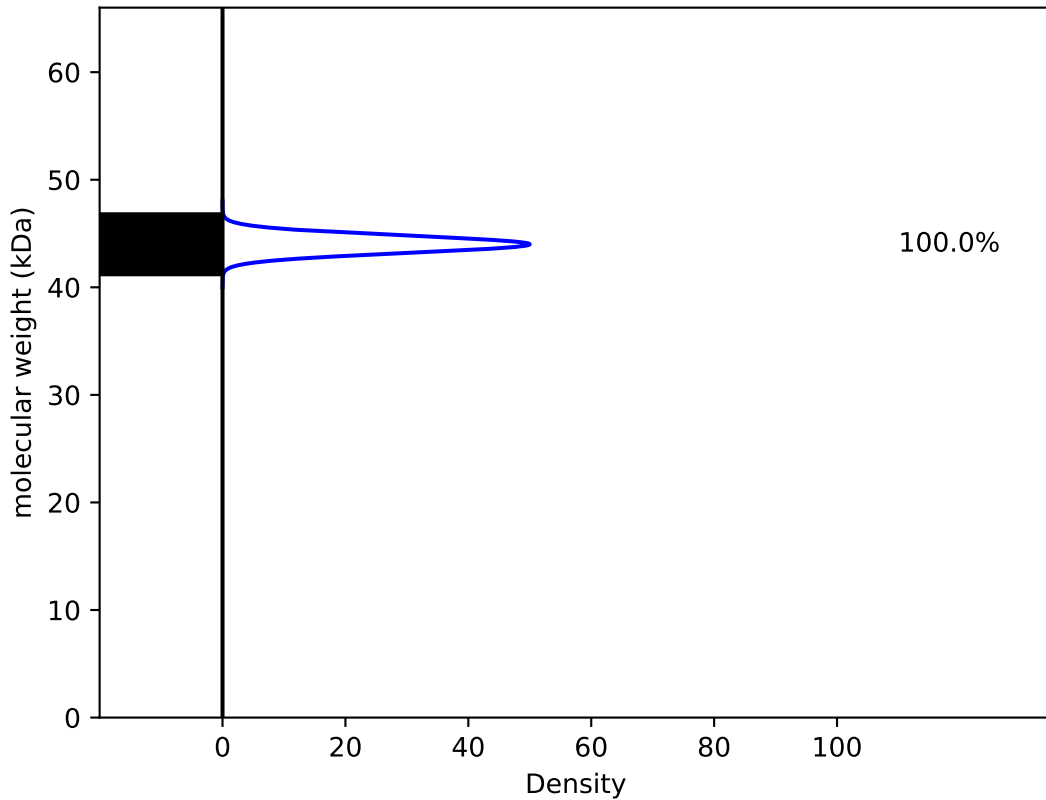

# Q9NWU5



# Q9NX20





# Q9NX24



# Q9NX46

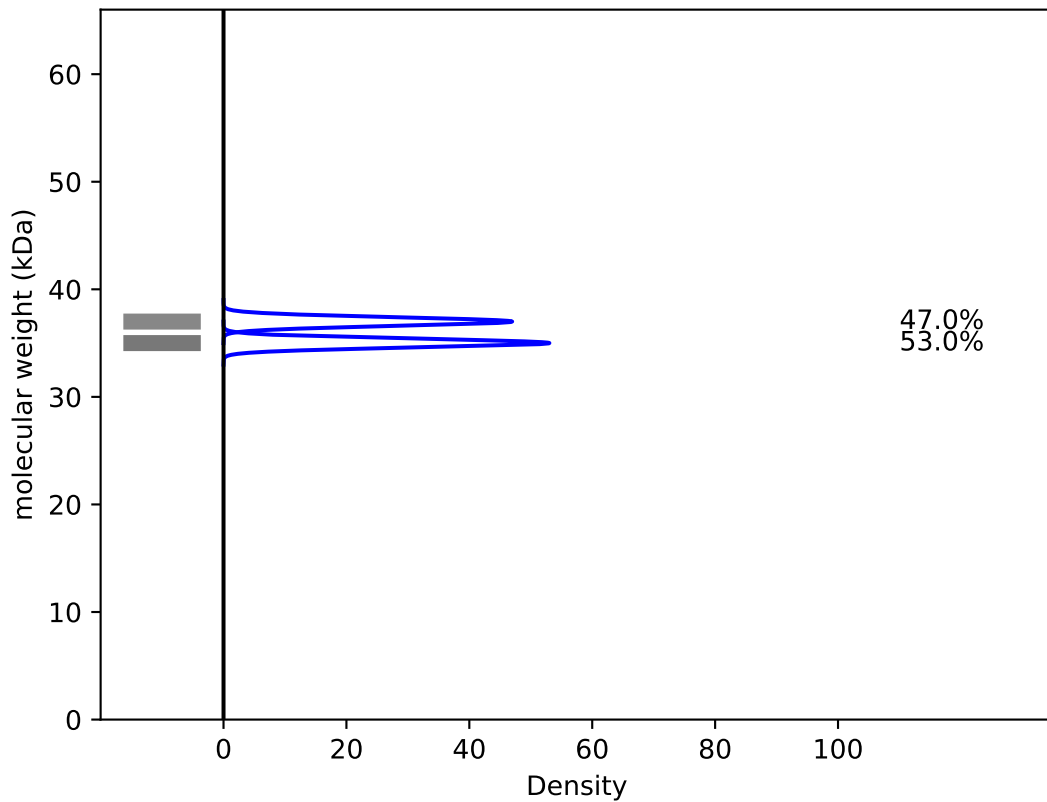

# Q9NX58



# Q9NX62



# Q9NX63

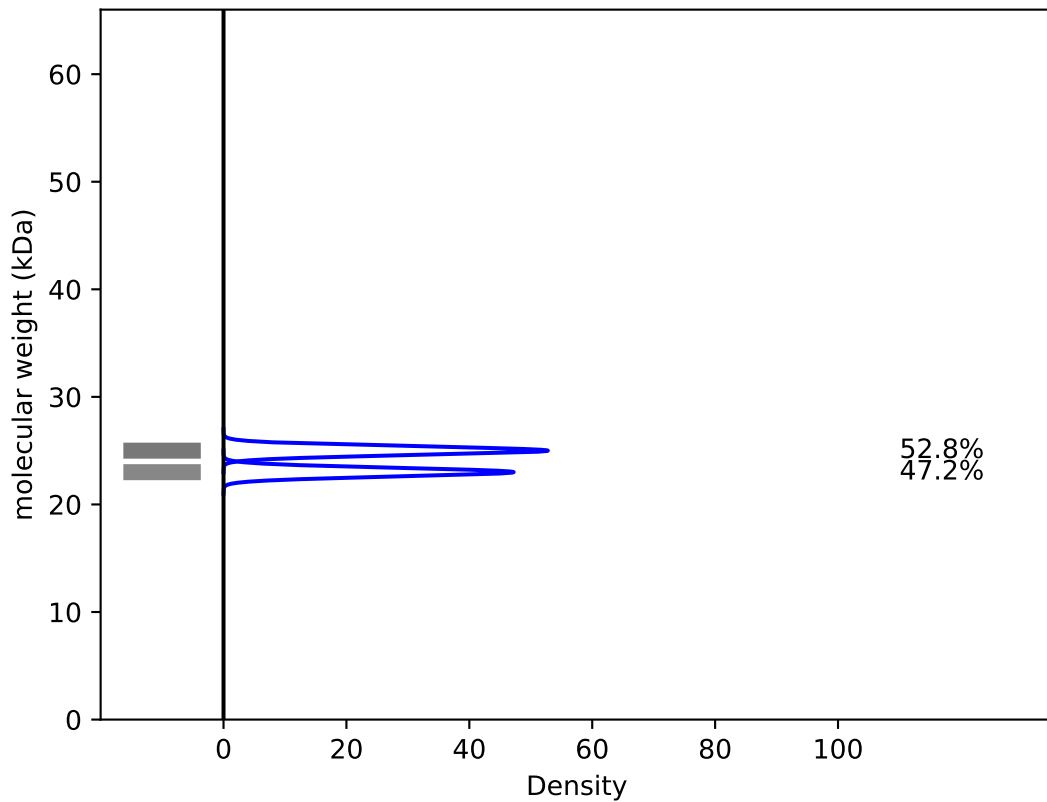

# Q9NXR7



# Q9NXW2



# Q9NY93

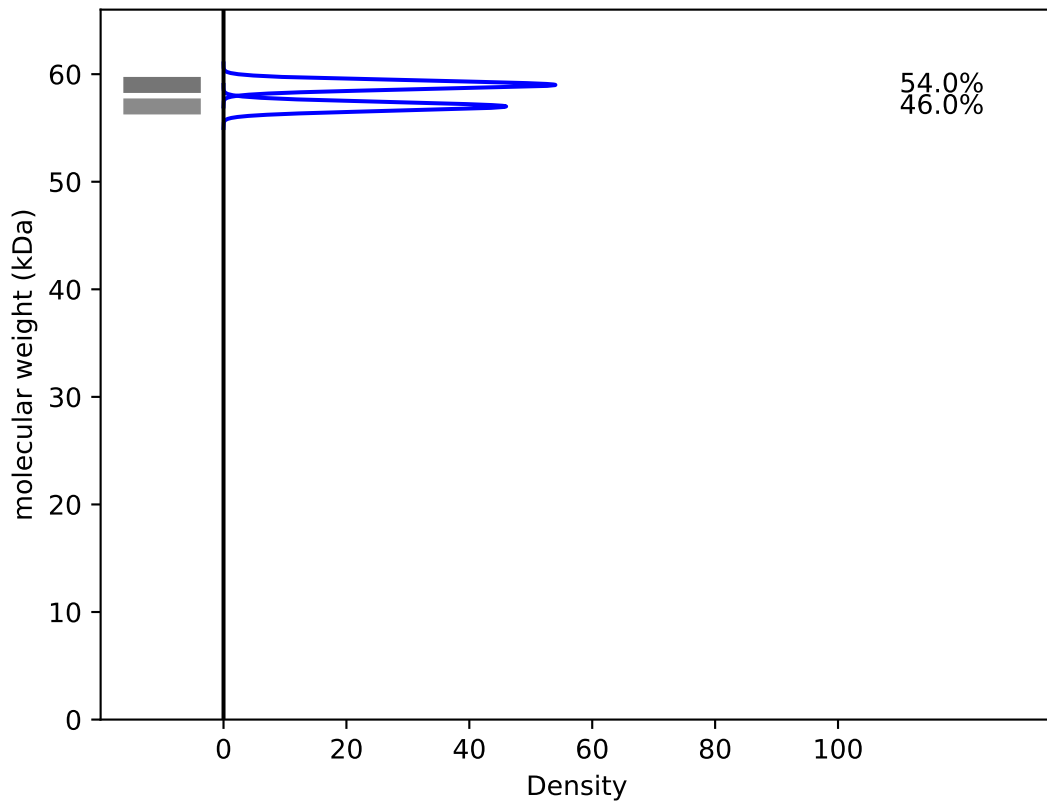



# Q9NYK5



# Q9NYL9

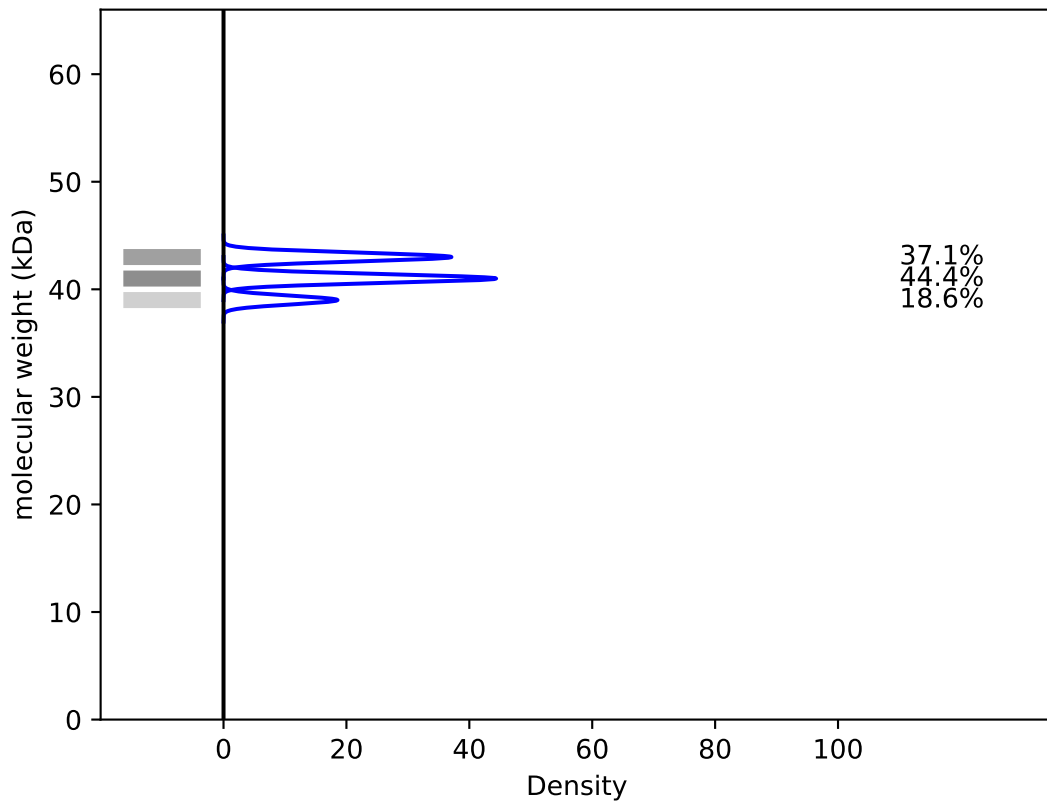

# Q9NZ01

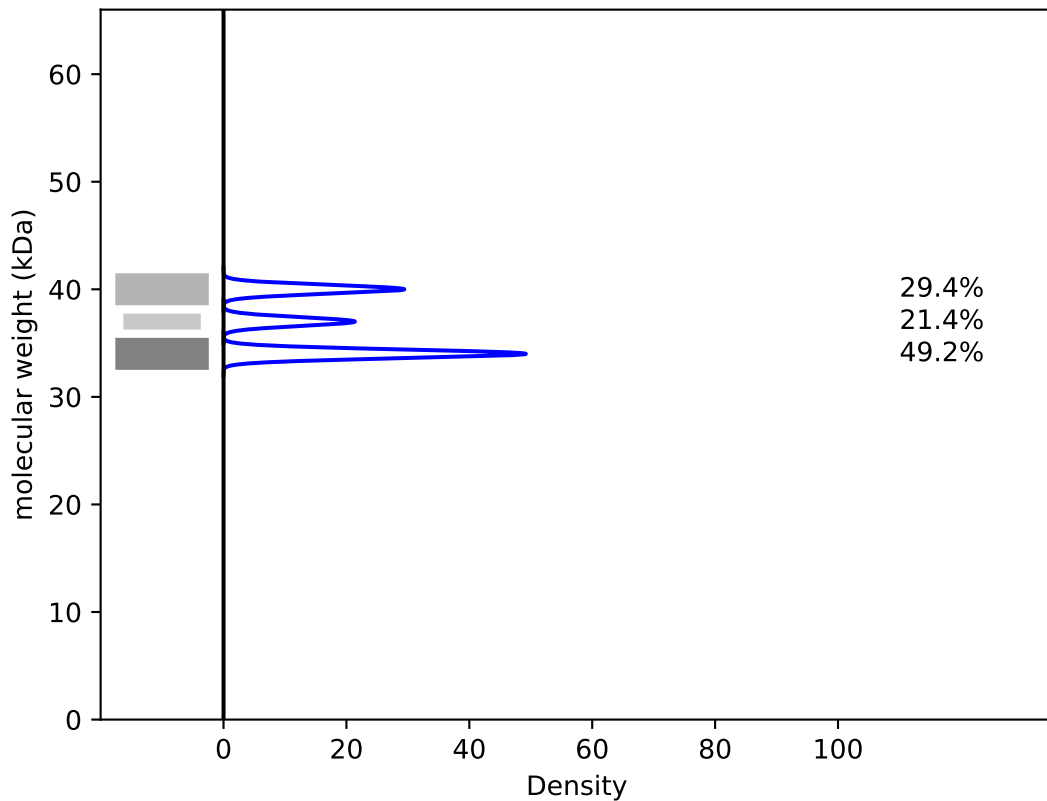

# Q9NZJ7



# Q9NZL4

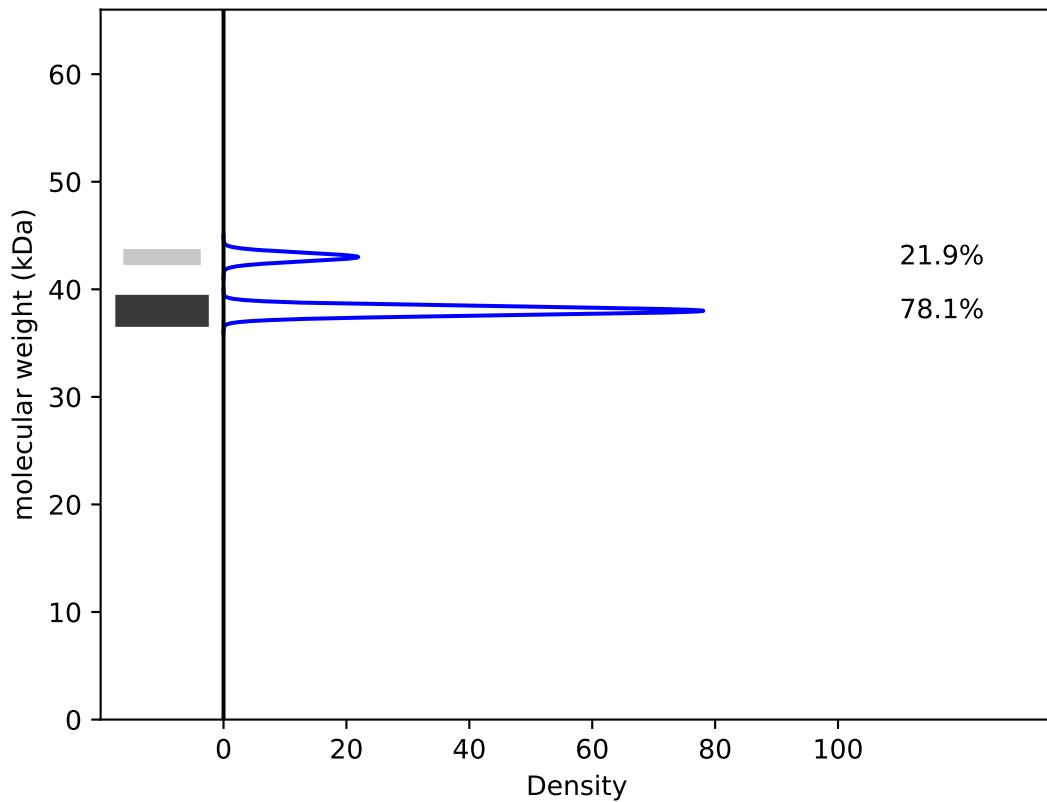

# Q9NZL9



# Q9NZM5



# Q9P000





# Q9P013



# Q9P015

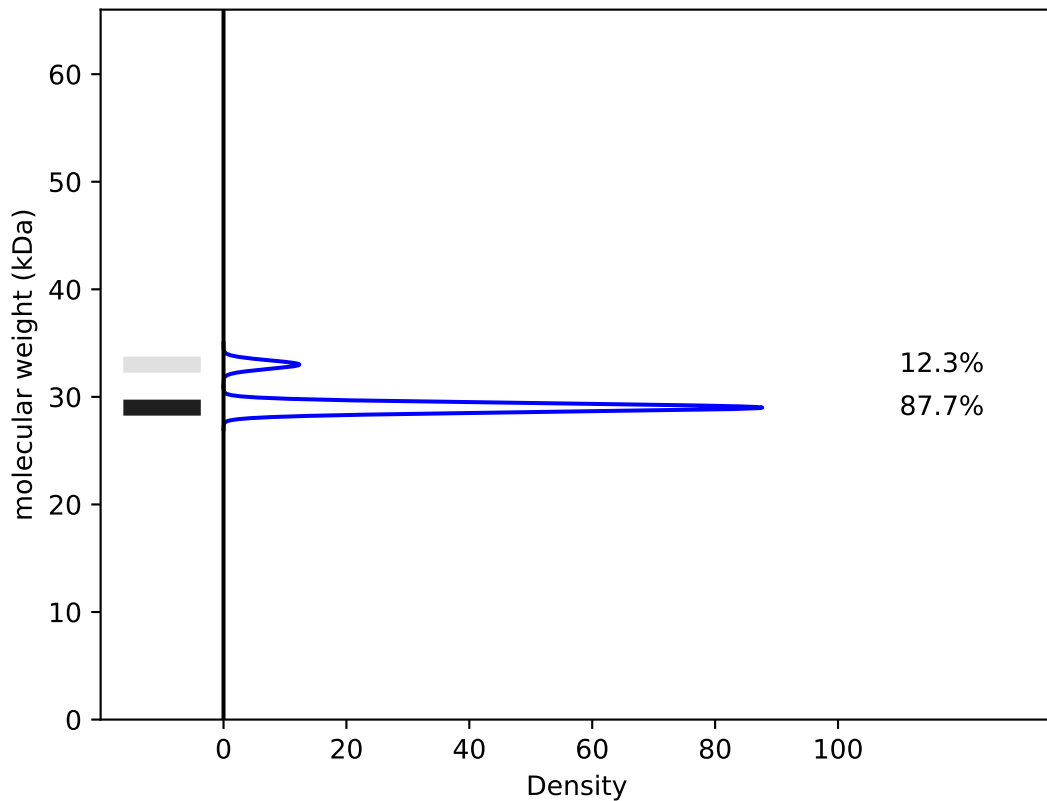

# Q9P0I2



# Q9P0L0

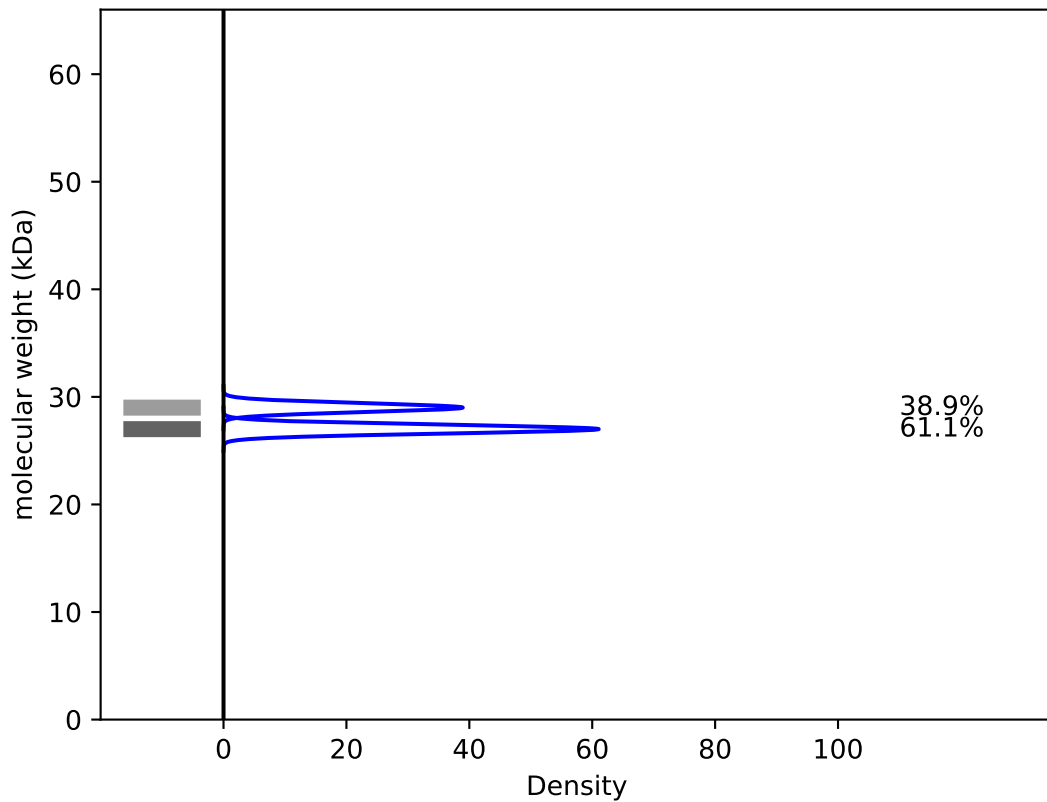

# Q9P0V9



# Q9P0W2



# Q9P258

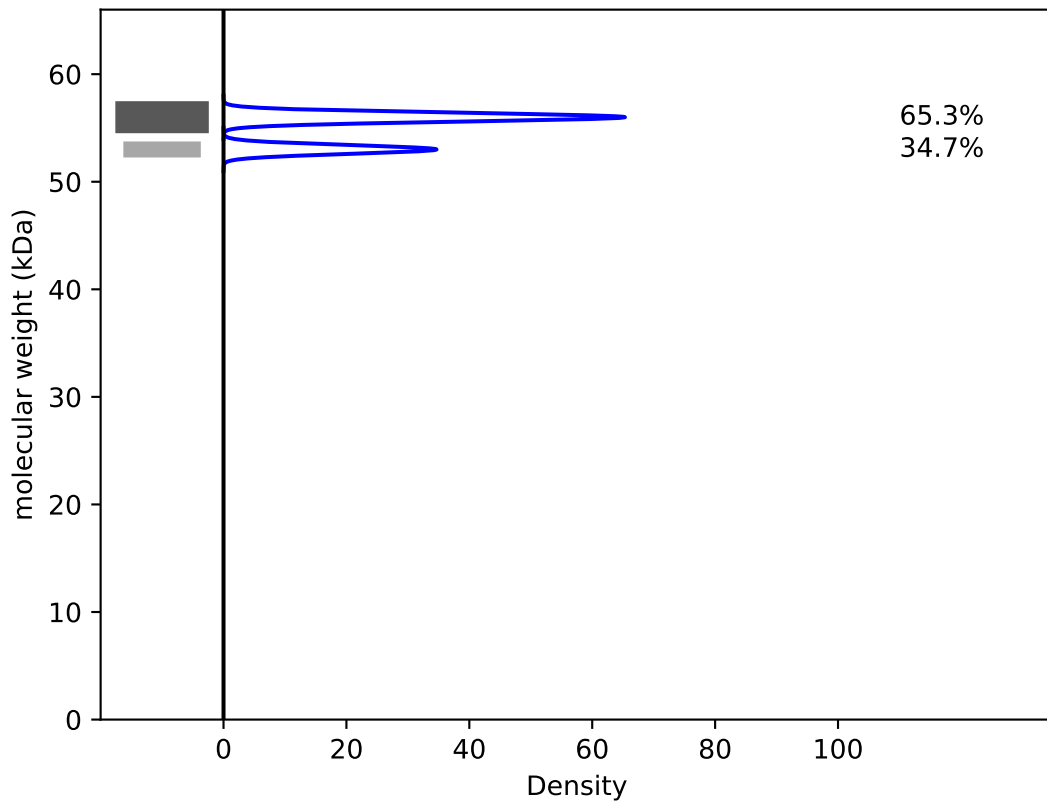

# Q9UBE0

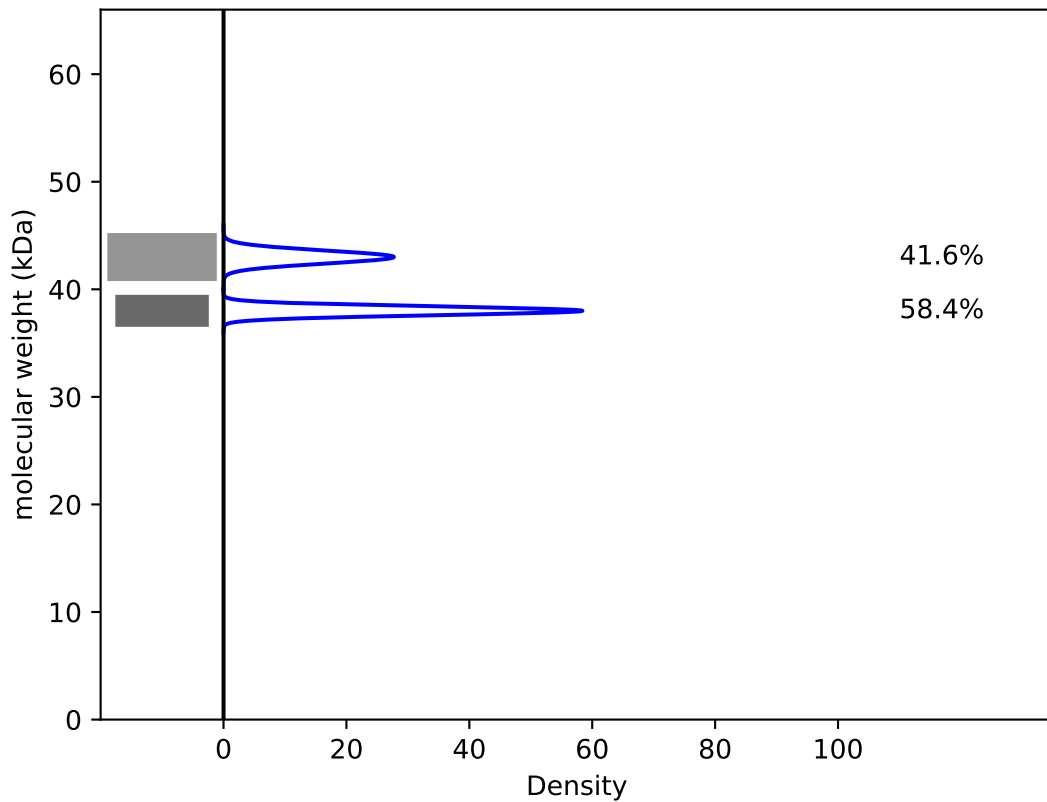



# Q9UBM7



# Q9UBP6



# Q9UBQ0



# Q9UBQ5



# Q9UBQ7



# Q9UBR2



# Q9UBS4



# Q9UBU8





# Q9UBW8

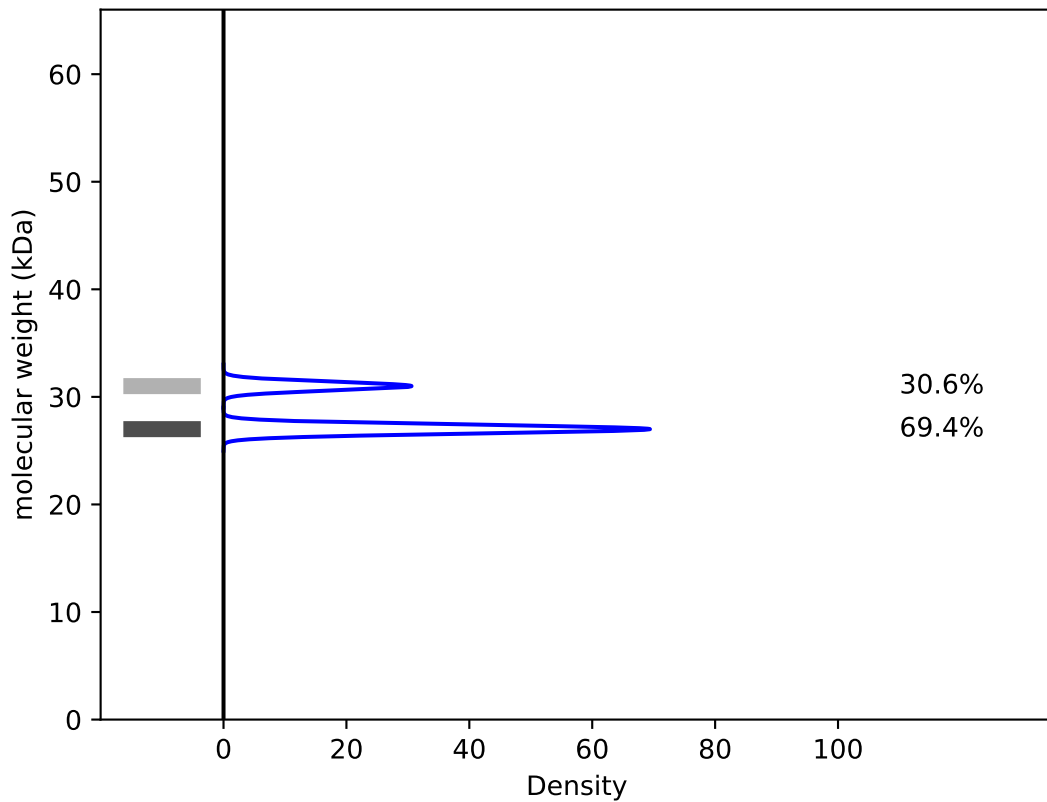

# Q9UBX3

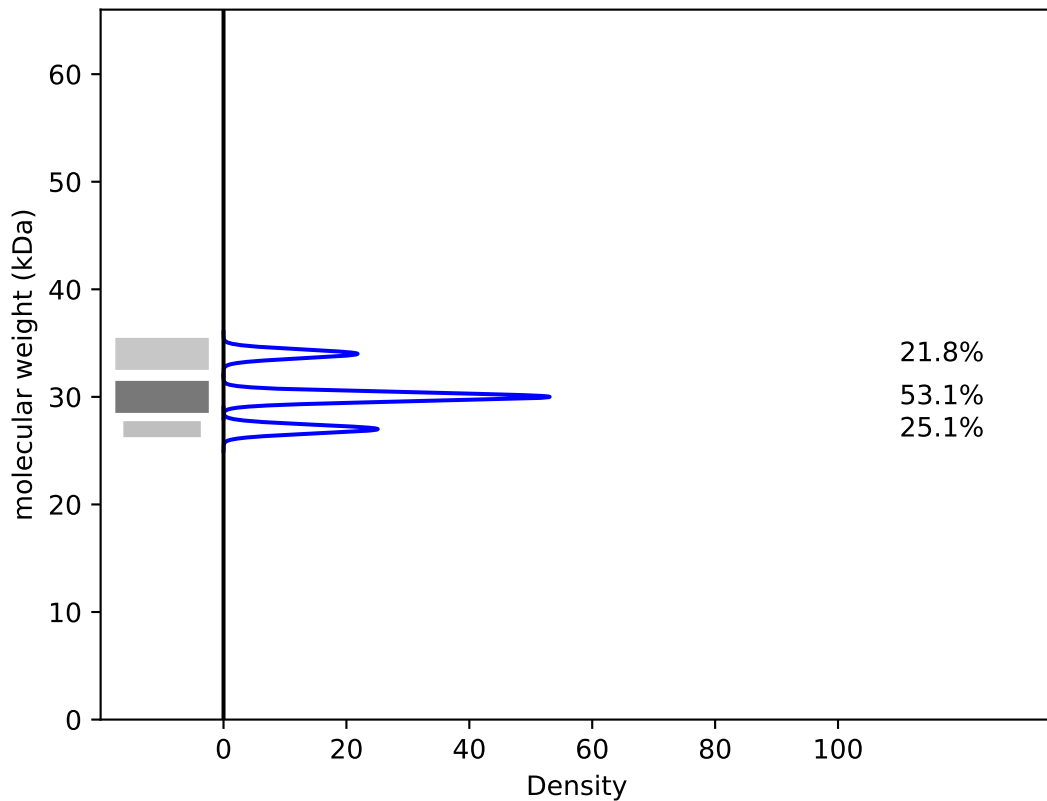

# Q9UDY4



# Q9UGI8



# Q9UGV2

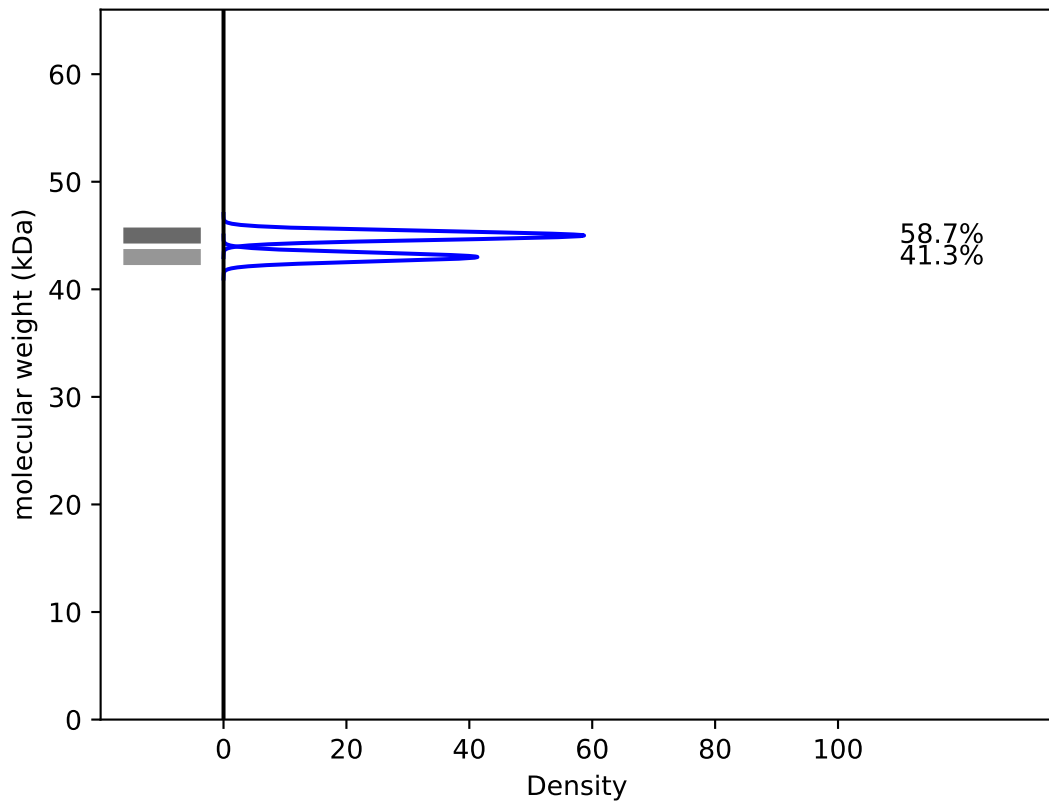

# Q9UHD1



# Q9UHG3

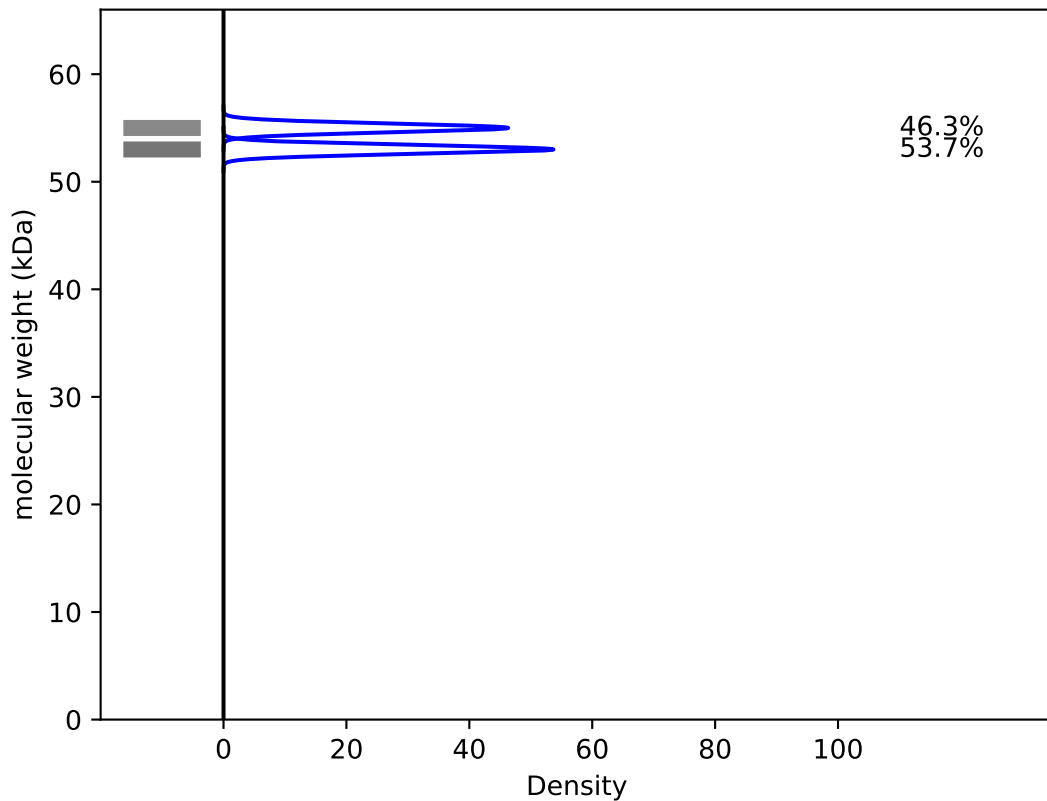

# Q9UHK6





# Q9UHX1



# Q9UI10

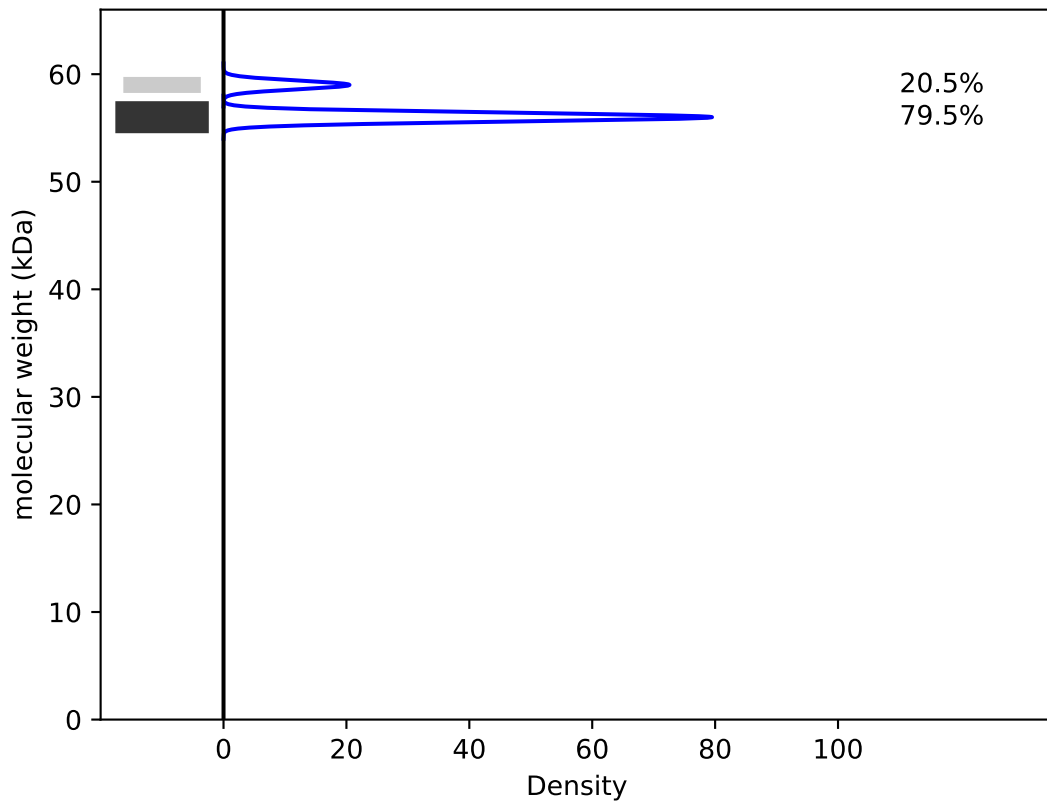

# Q9UI42



# Q9UIJ7

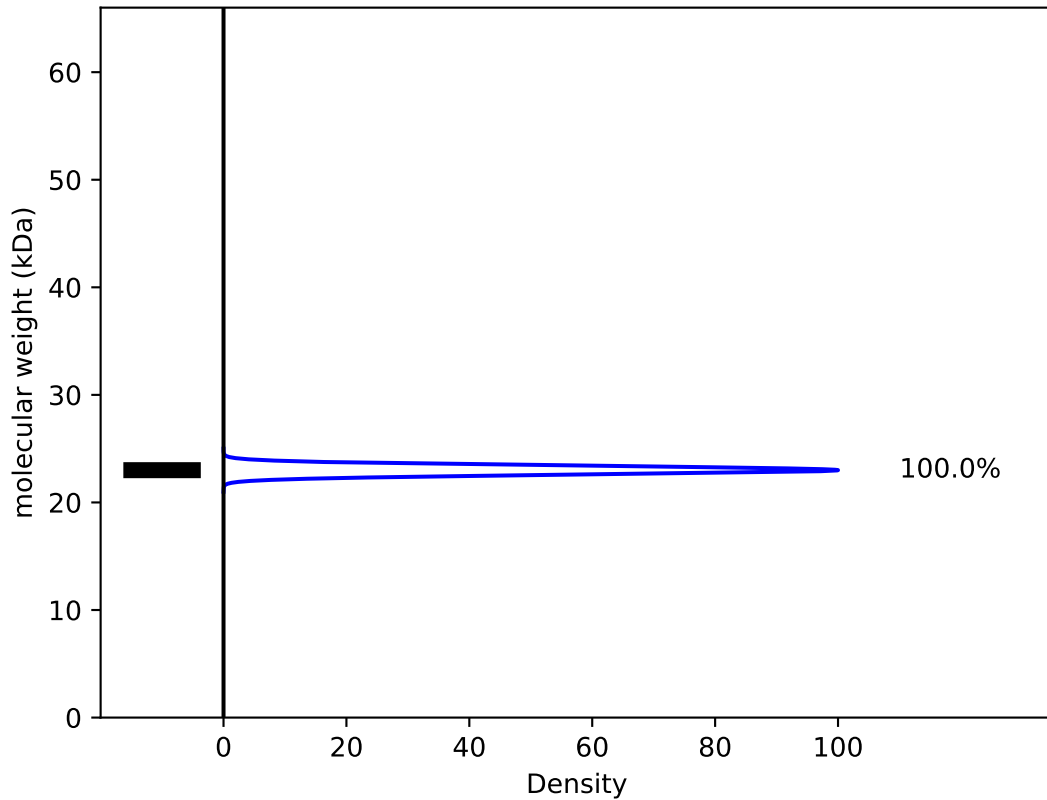

# Q9UJA5



# Q9UJW0

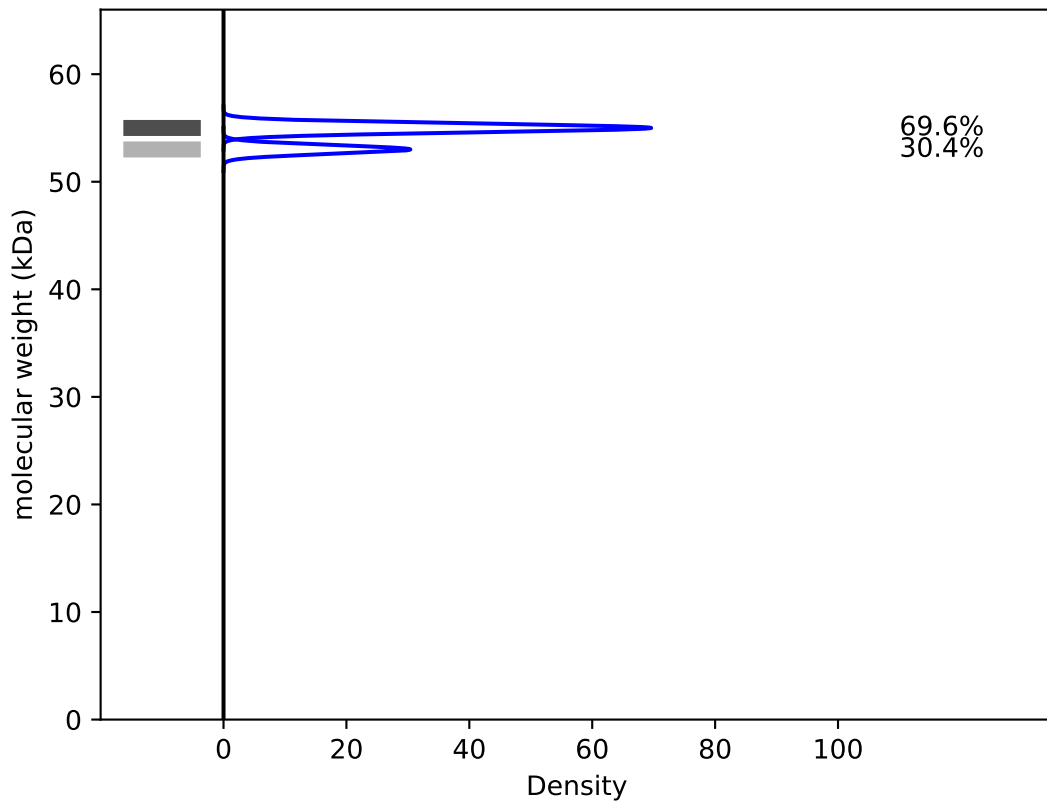

# Q9UJZ1

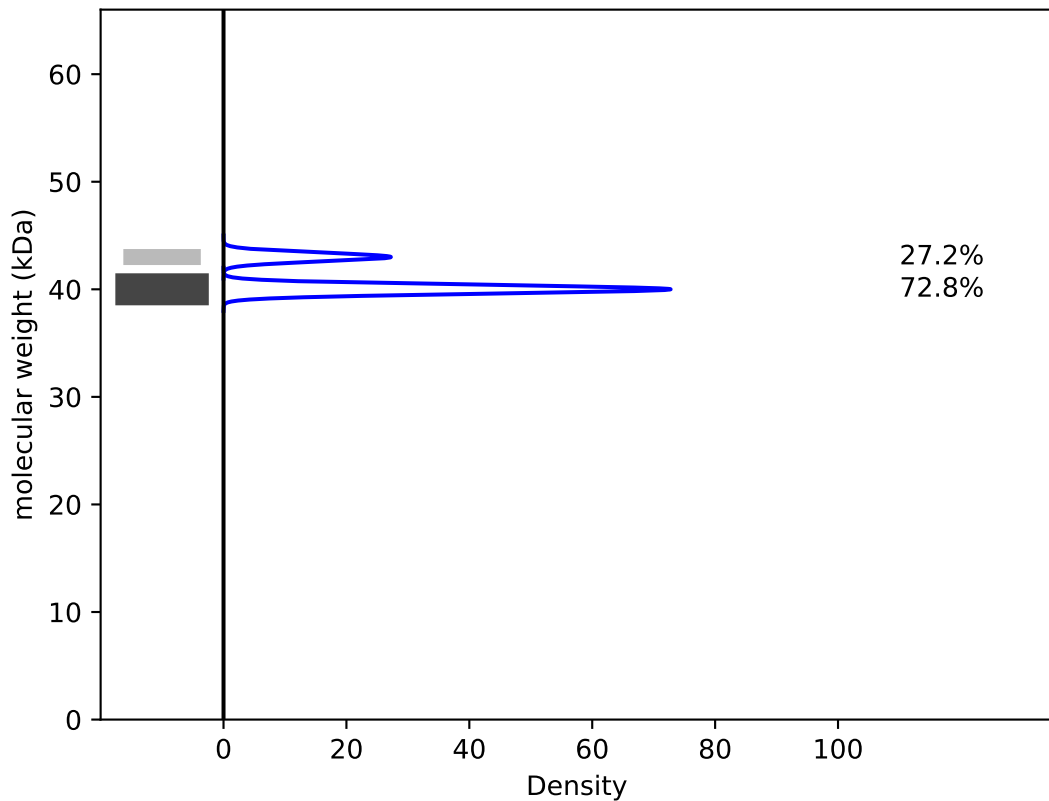

# Q9UKD2

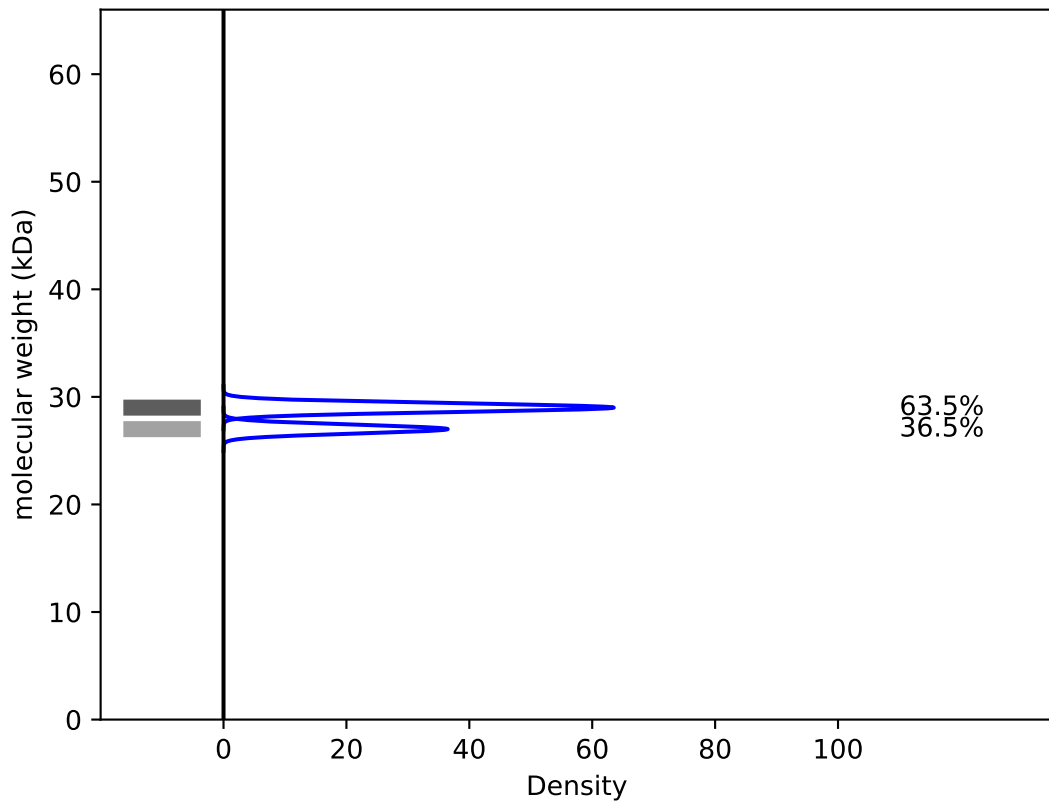



Q9UKK9



# Q9UKL0



# Q9P2K3



# Q9UKM9

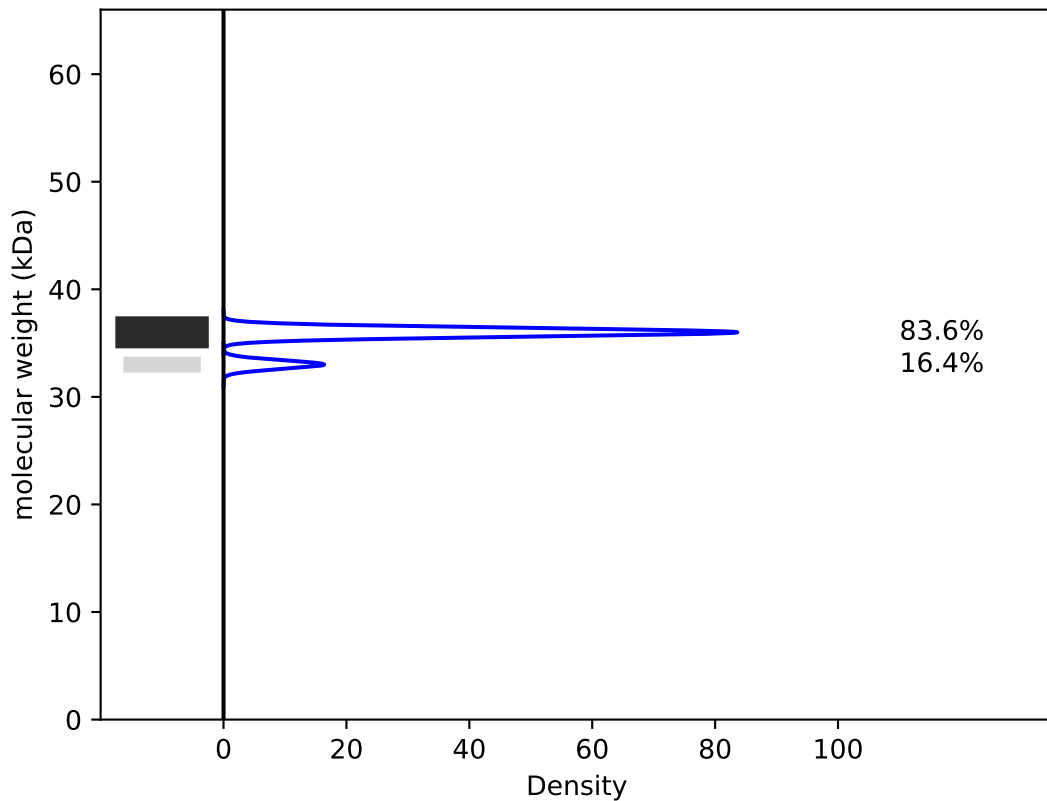

# Q9UKX7

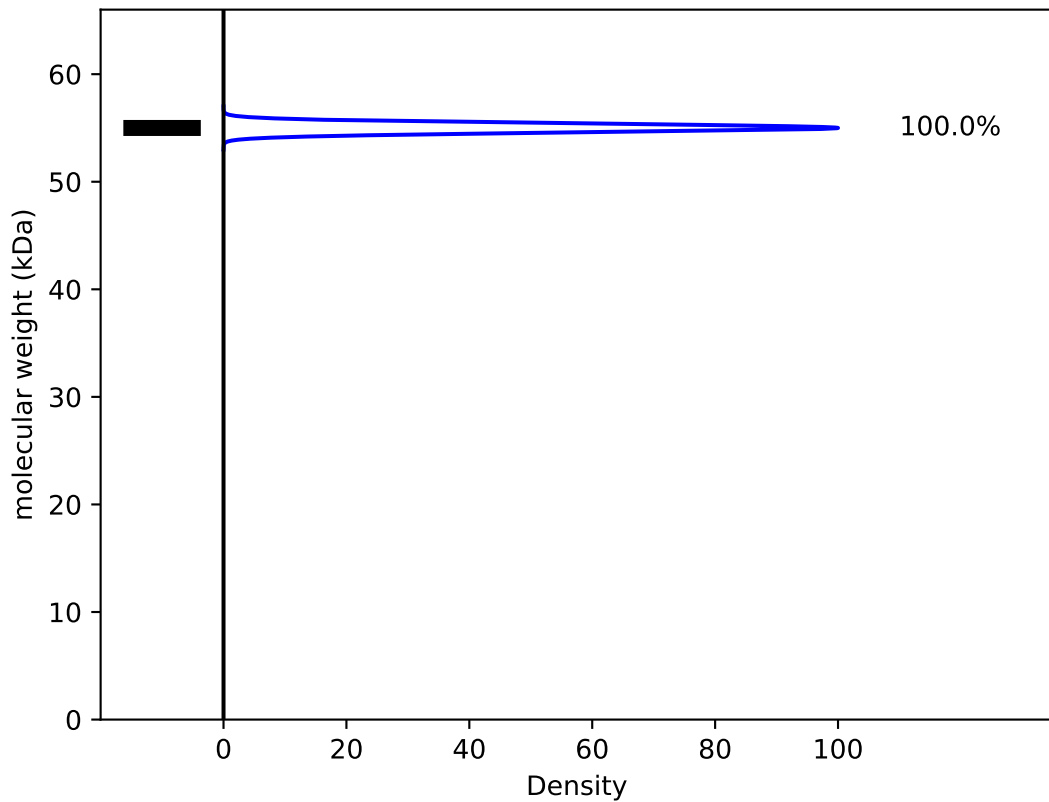

# Q9UKY7

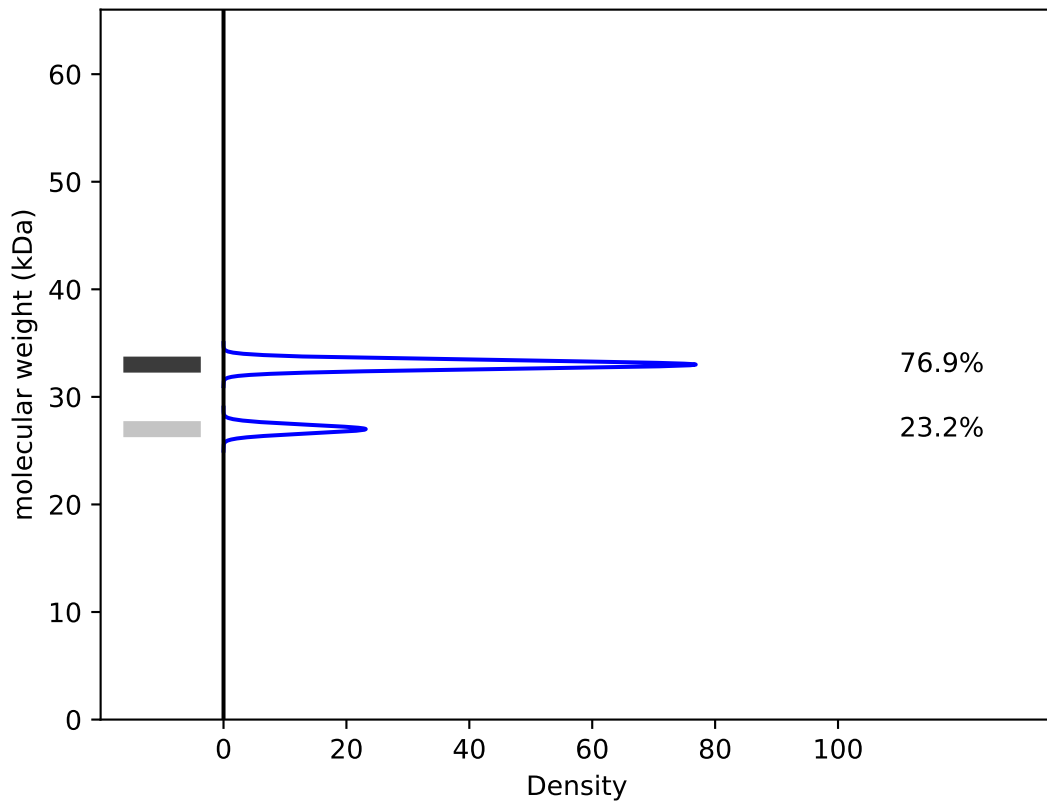

# Q9UL25

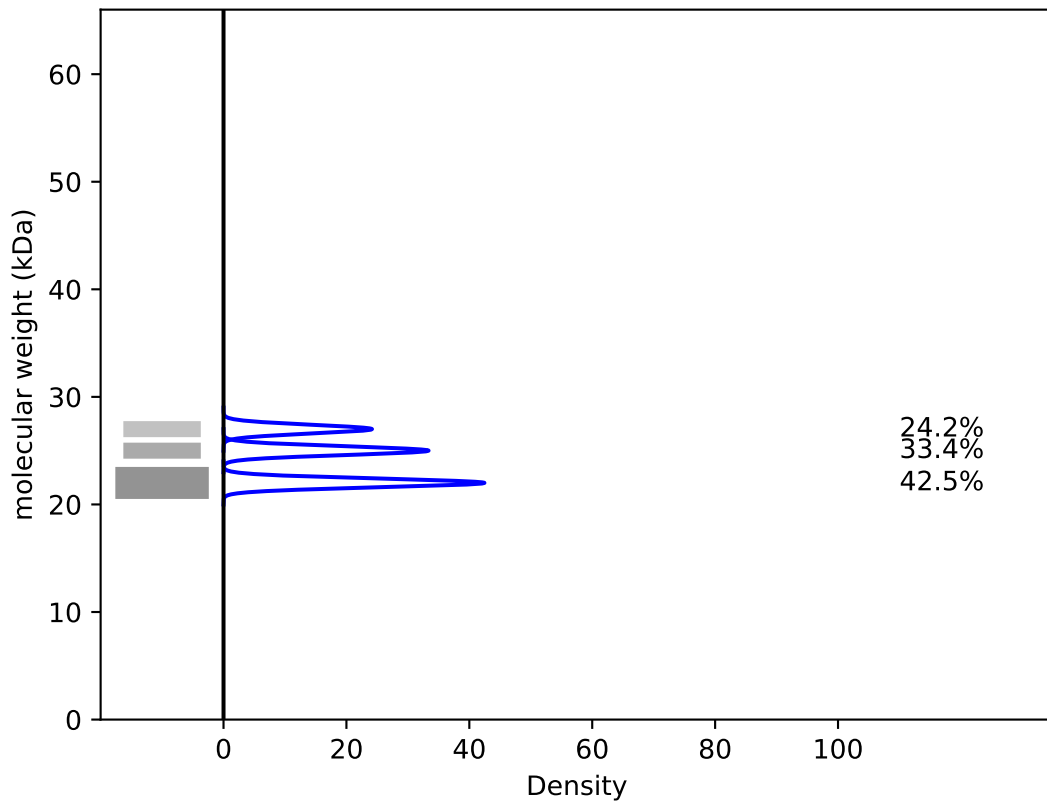

# Q9UL46

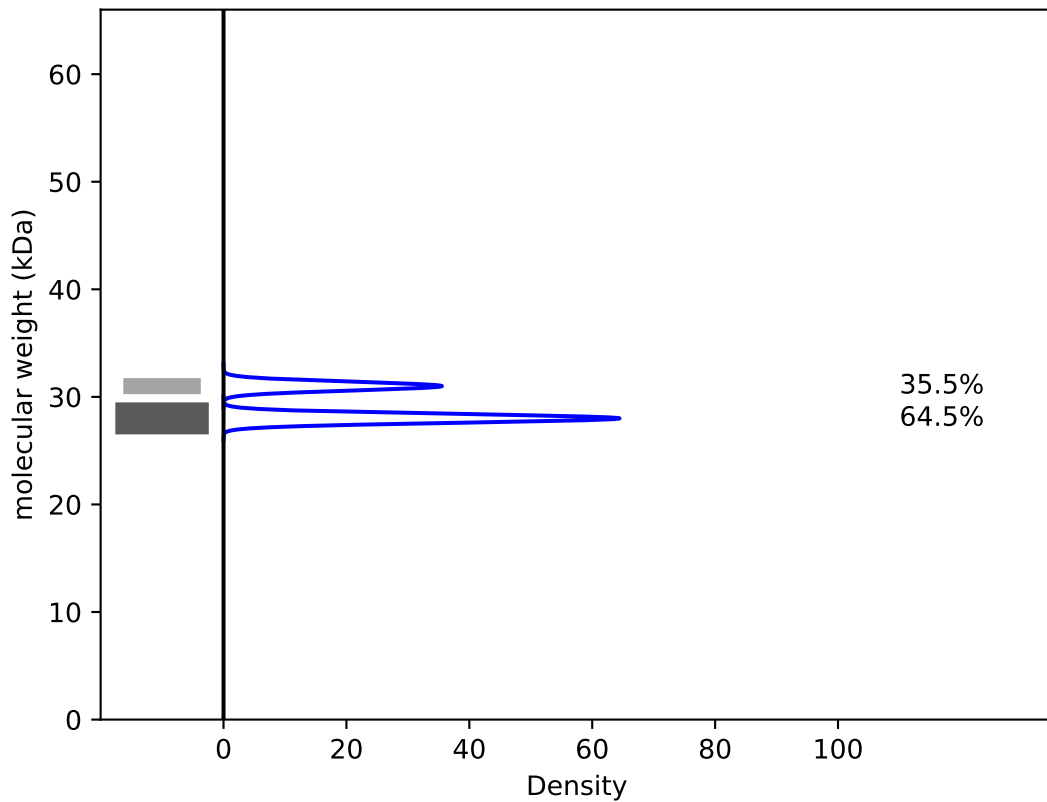



# Q9ULC4

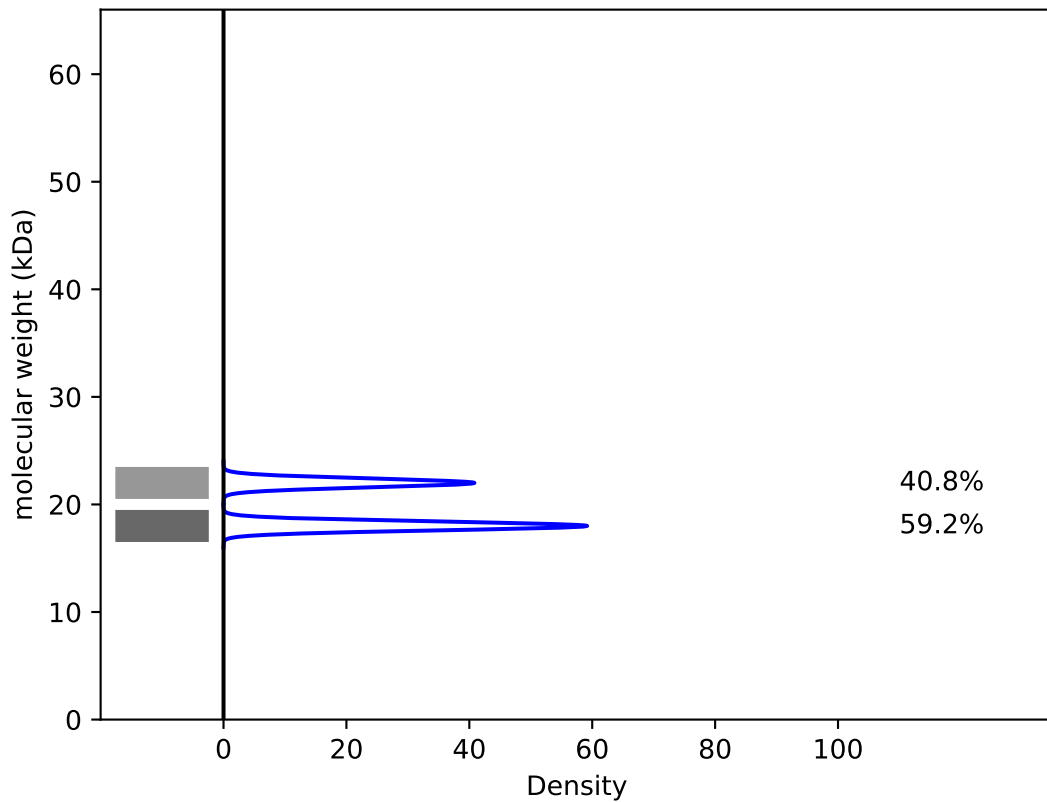

# Q9ULR0



# Q9ULV4

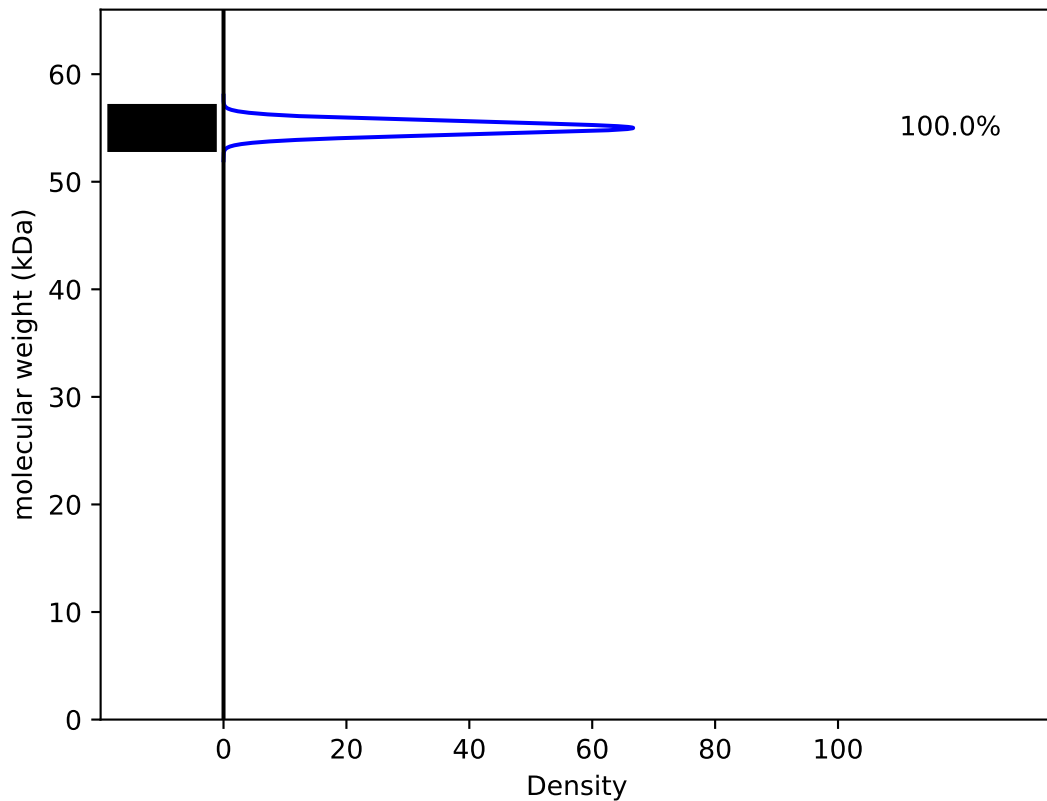

# Q9UM00

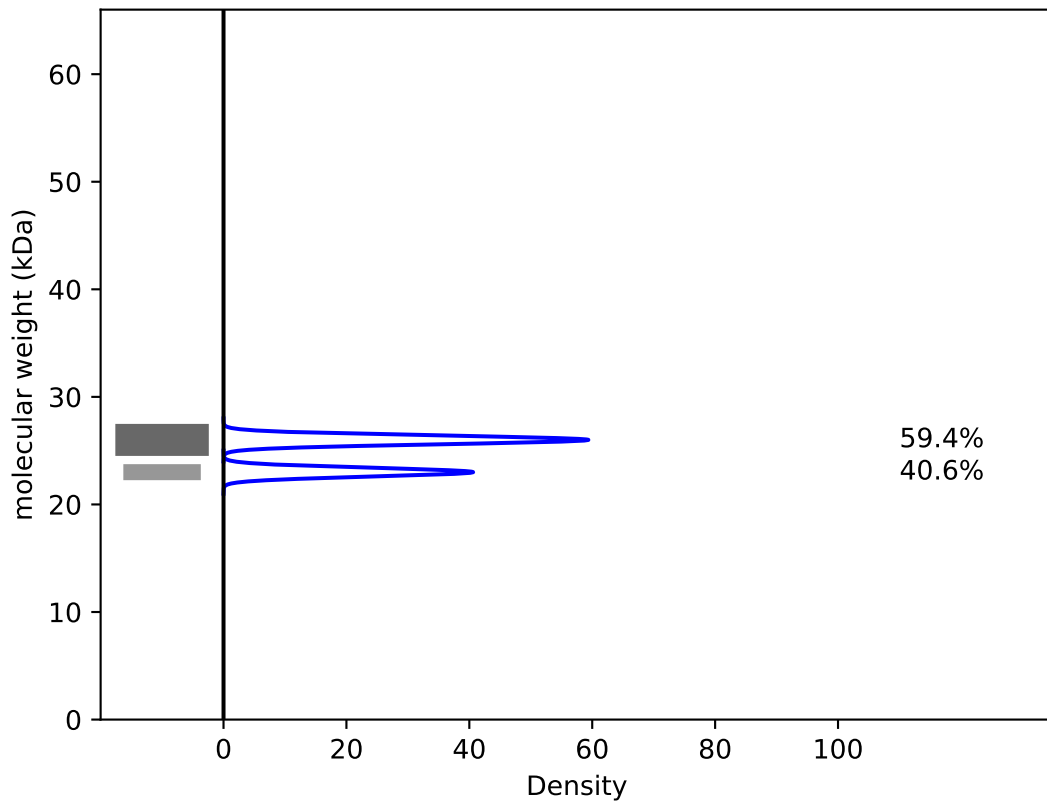

# Q9UMR5

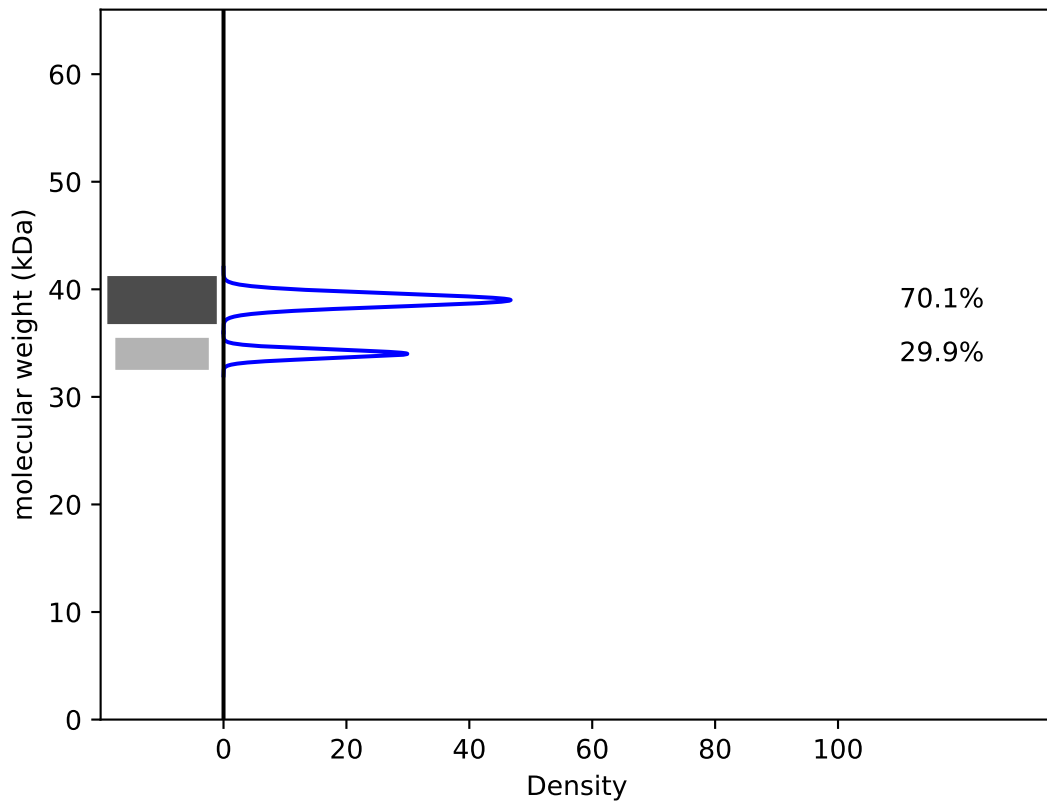

# Q9UMS4

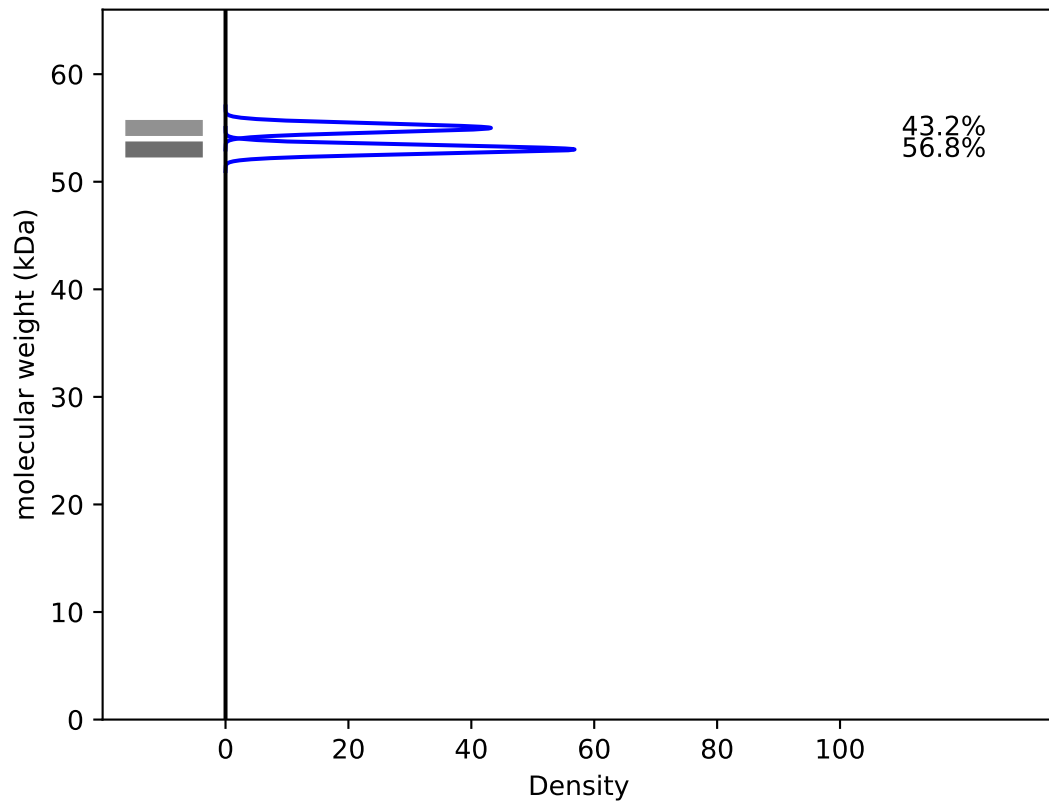

# Q9UN86



# Q9UNE7





# Q9UNF0



# Q9UNH7



# Q9UNM6

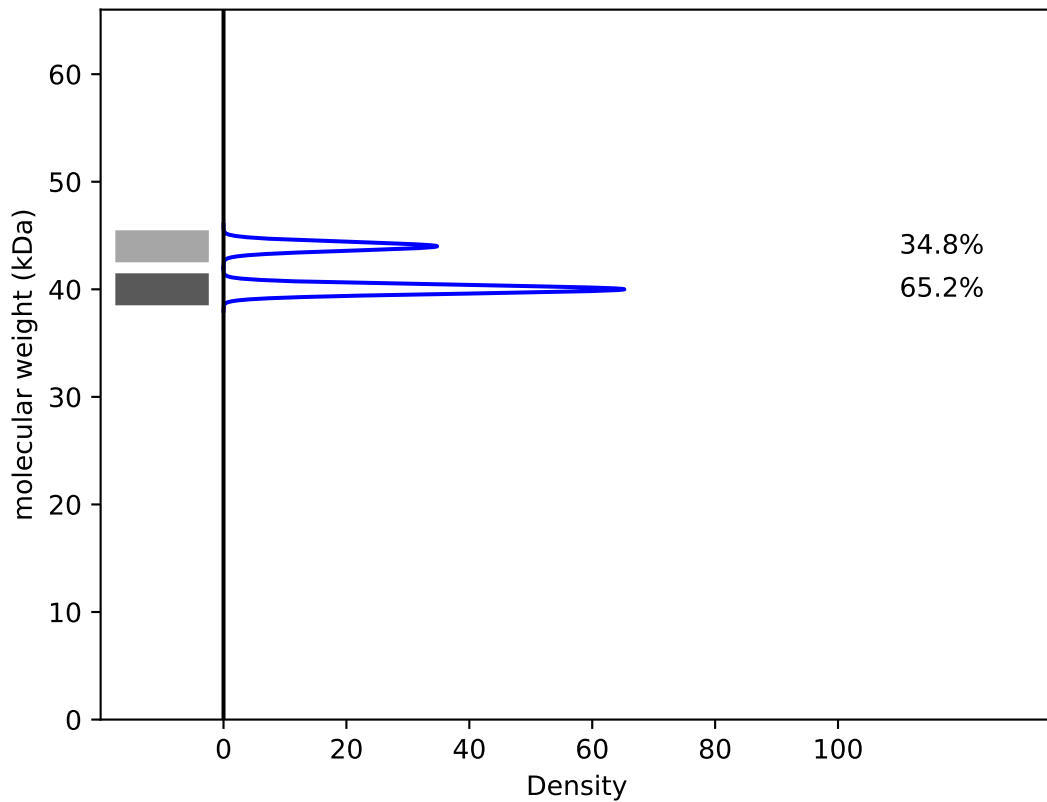

# Q9UNQ2

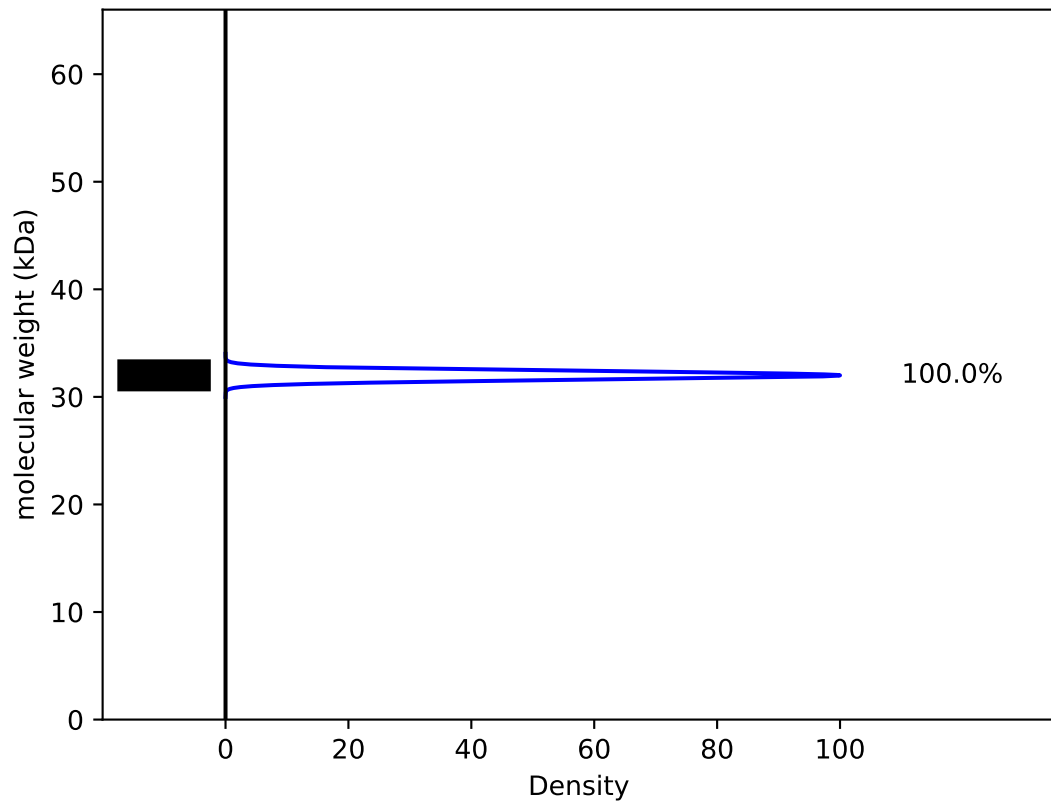

# Q9UNS2



# Q9UNZ2



# Q9UQ80



# Q9Y221

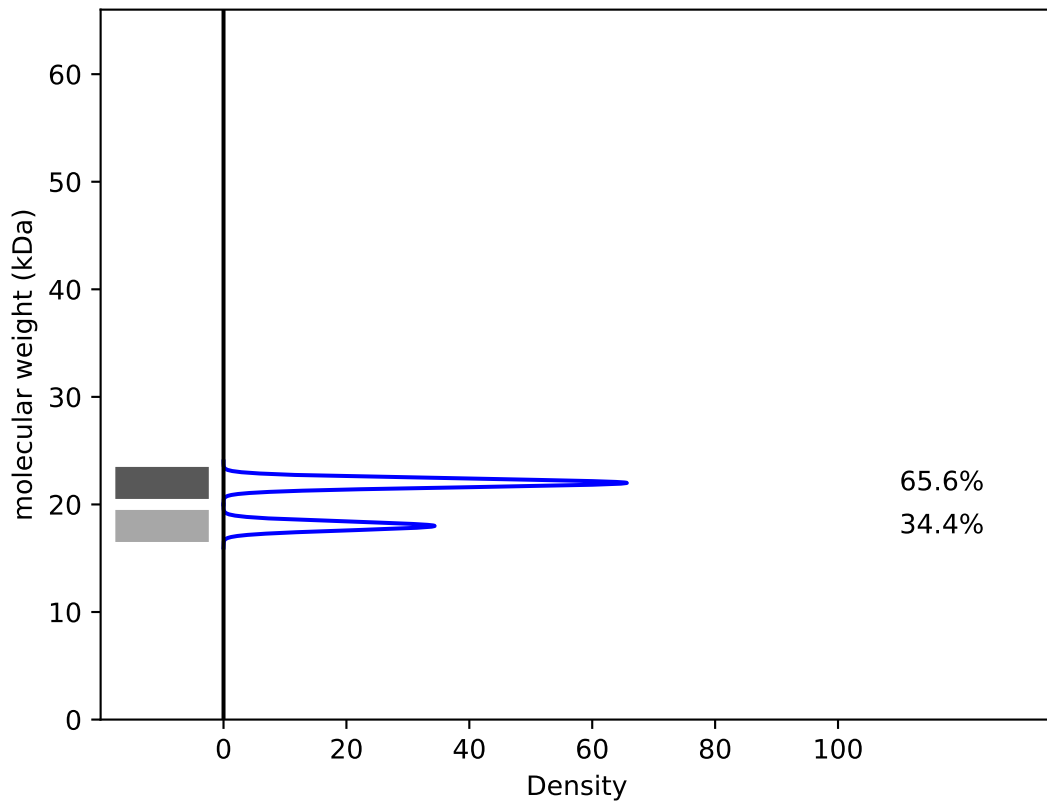



# Q9Y230

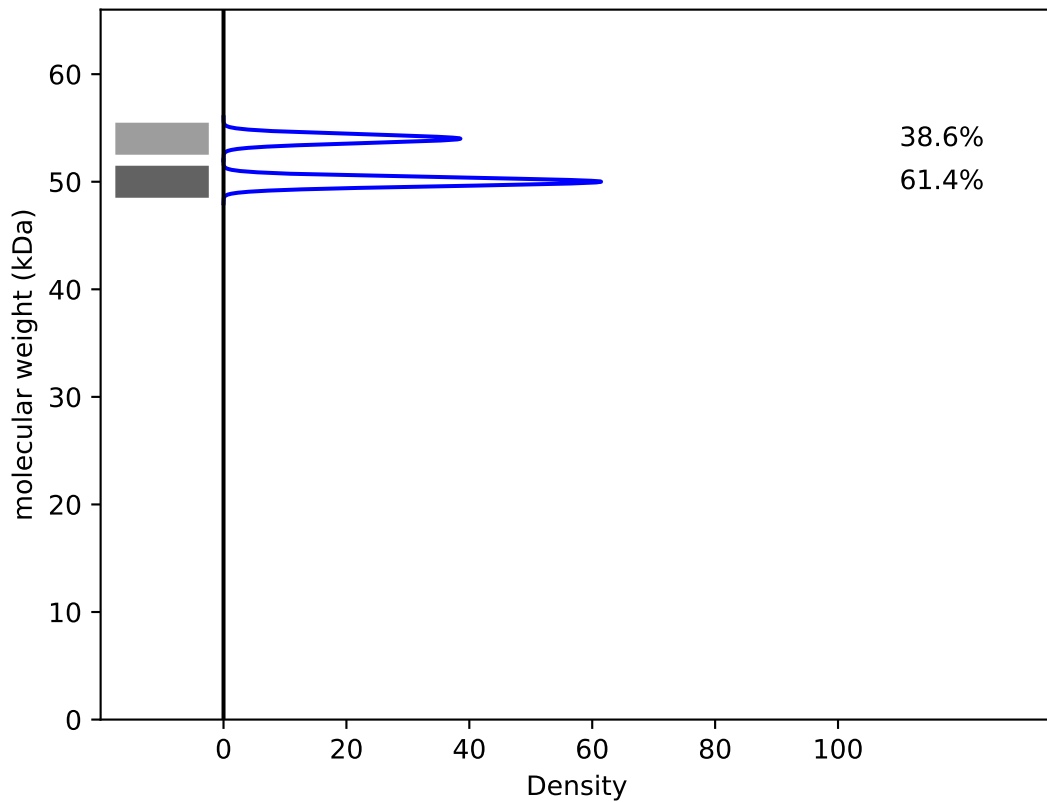

# Q9Y265

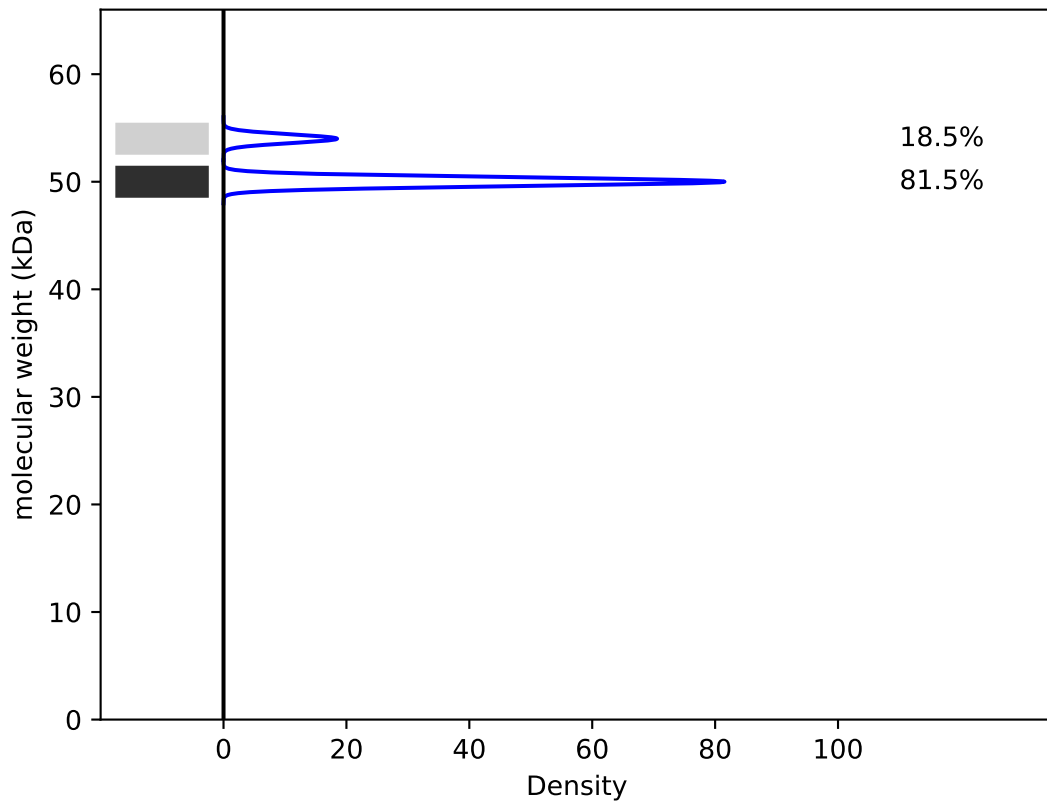

# Q9Y266

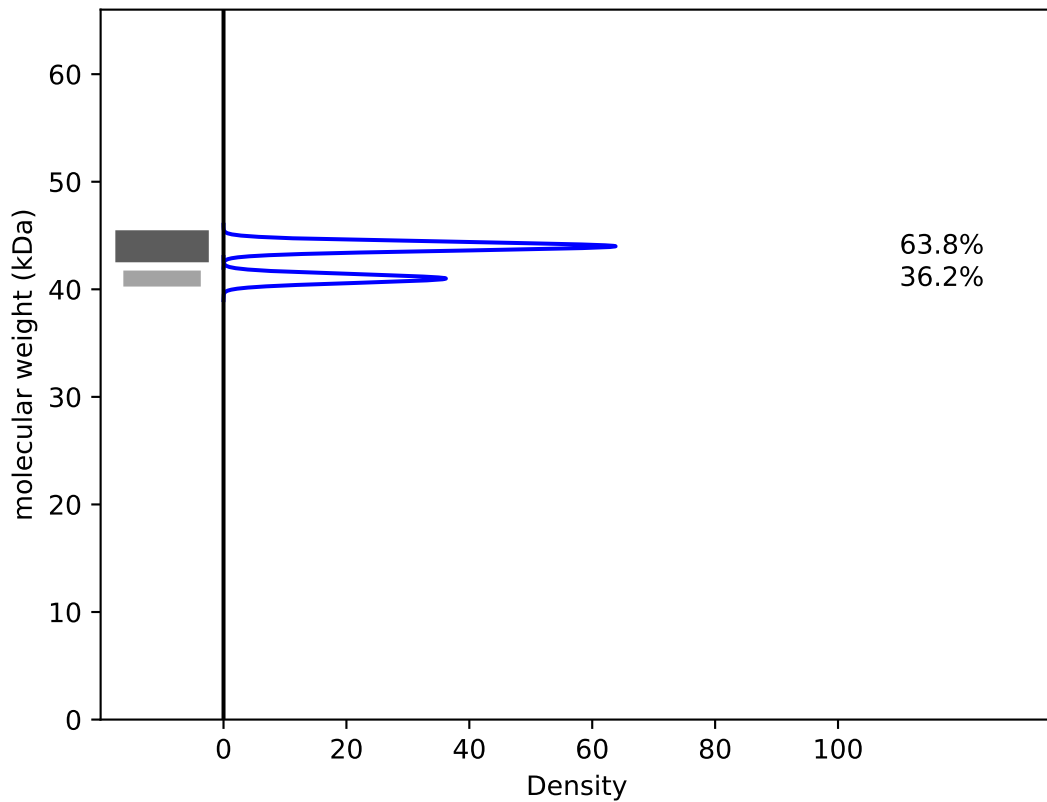

# Q9Y276

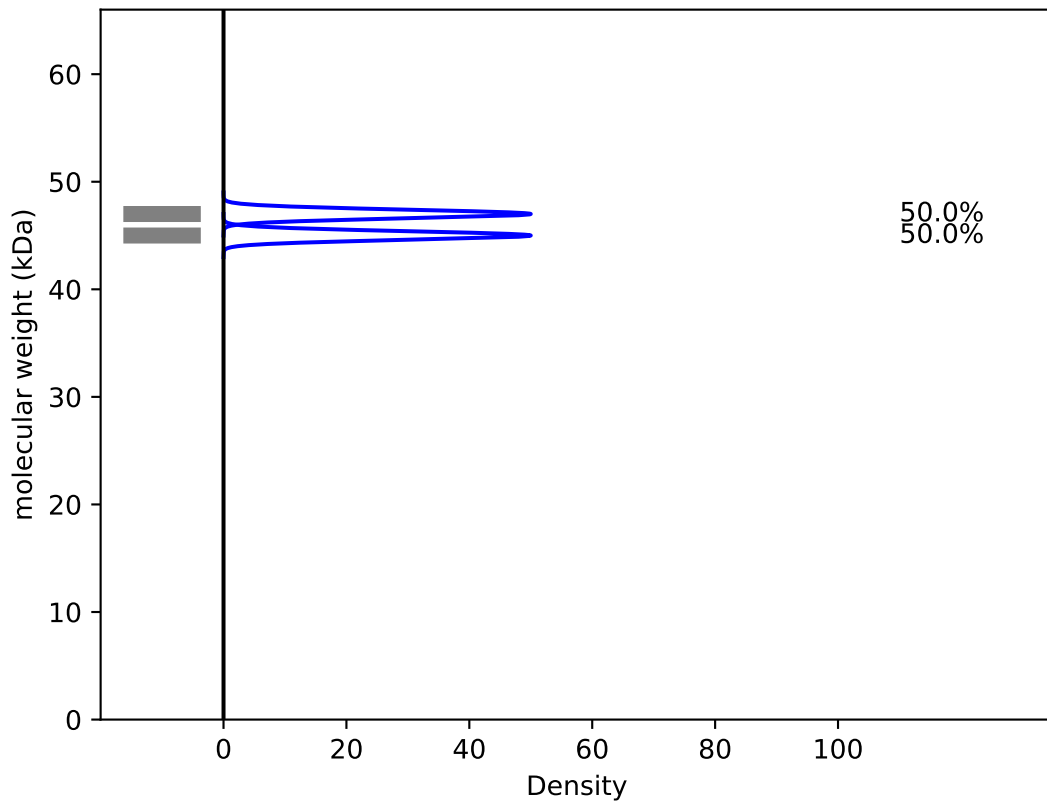

# Q9Y277

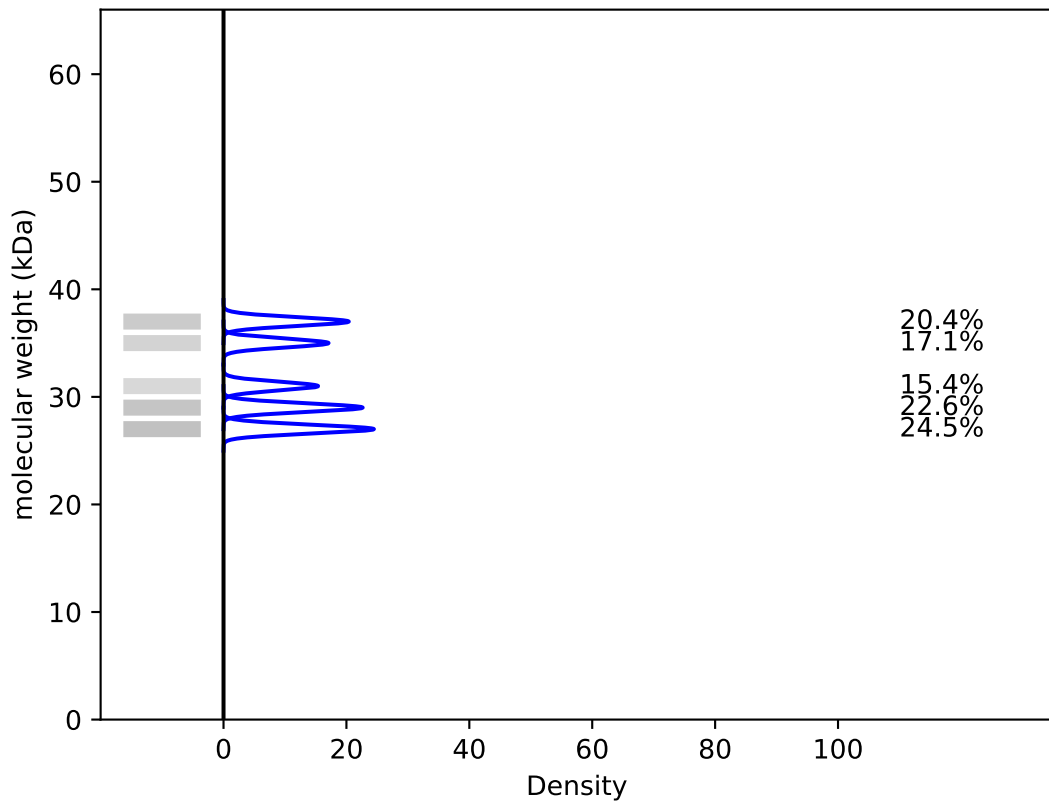

# Q9Y281



# Q9Y282



# Q9Y285

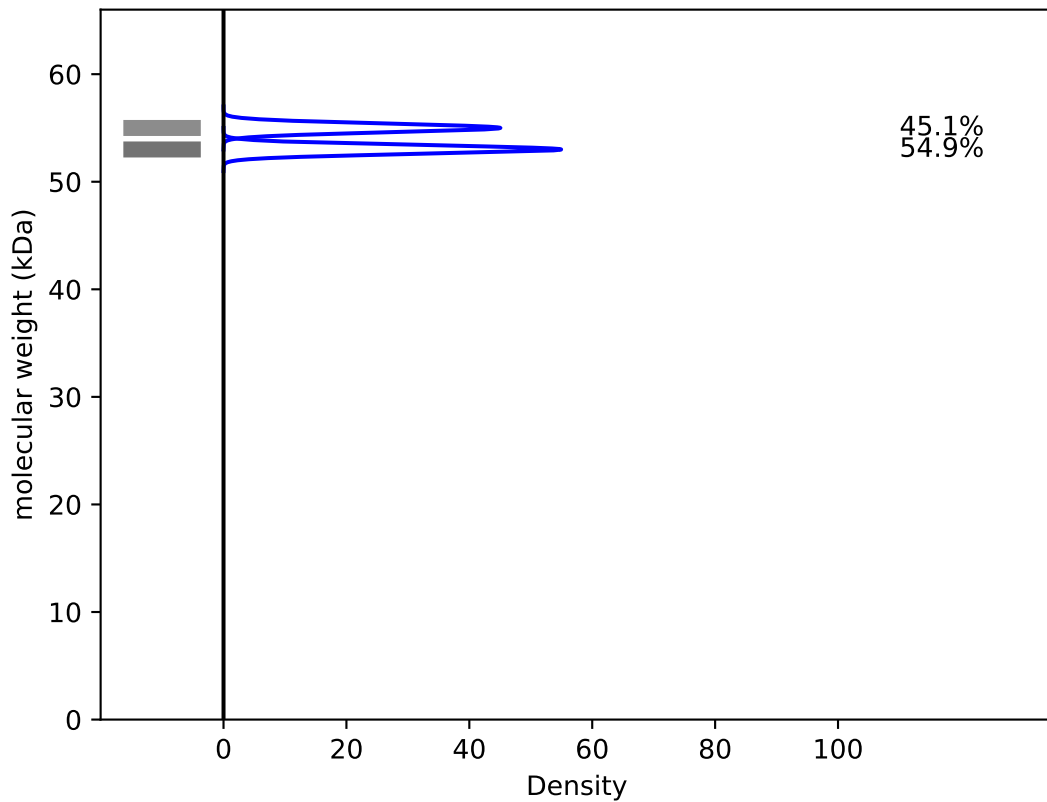



# Q9Y295



# Q9Y296



# Q9Y2C4



Q9Y2P8



# Q9Y2Q3

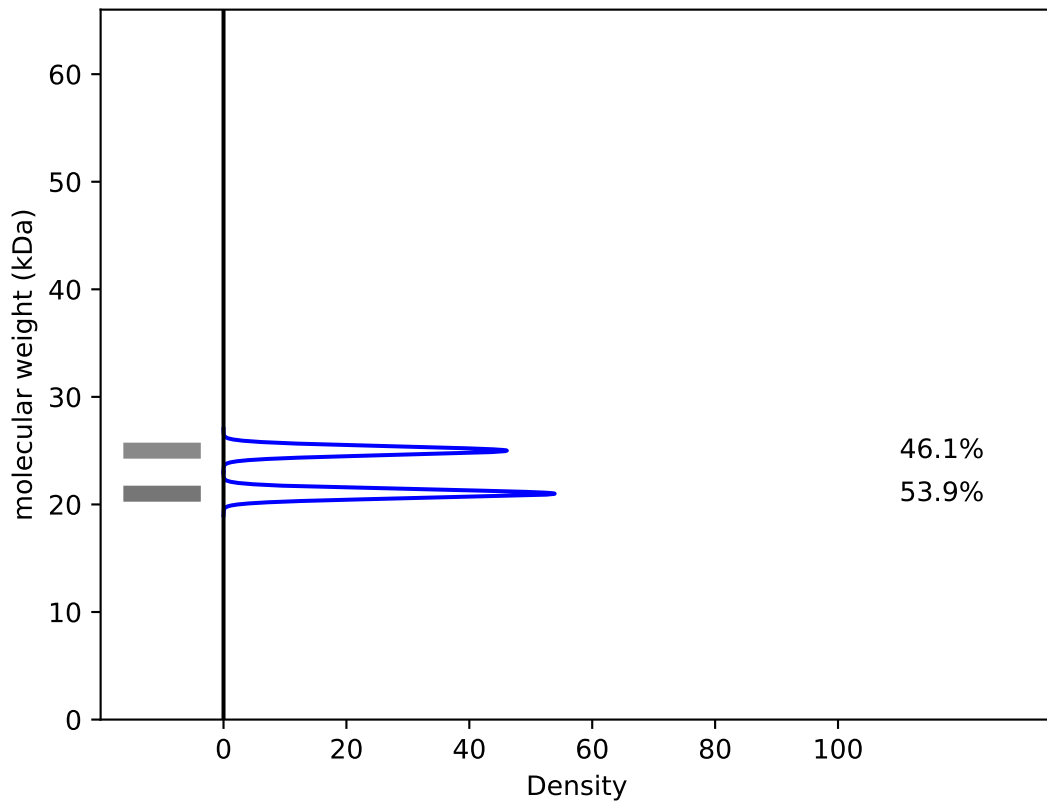

# Q9Y2S7

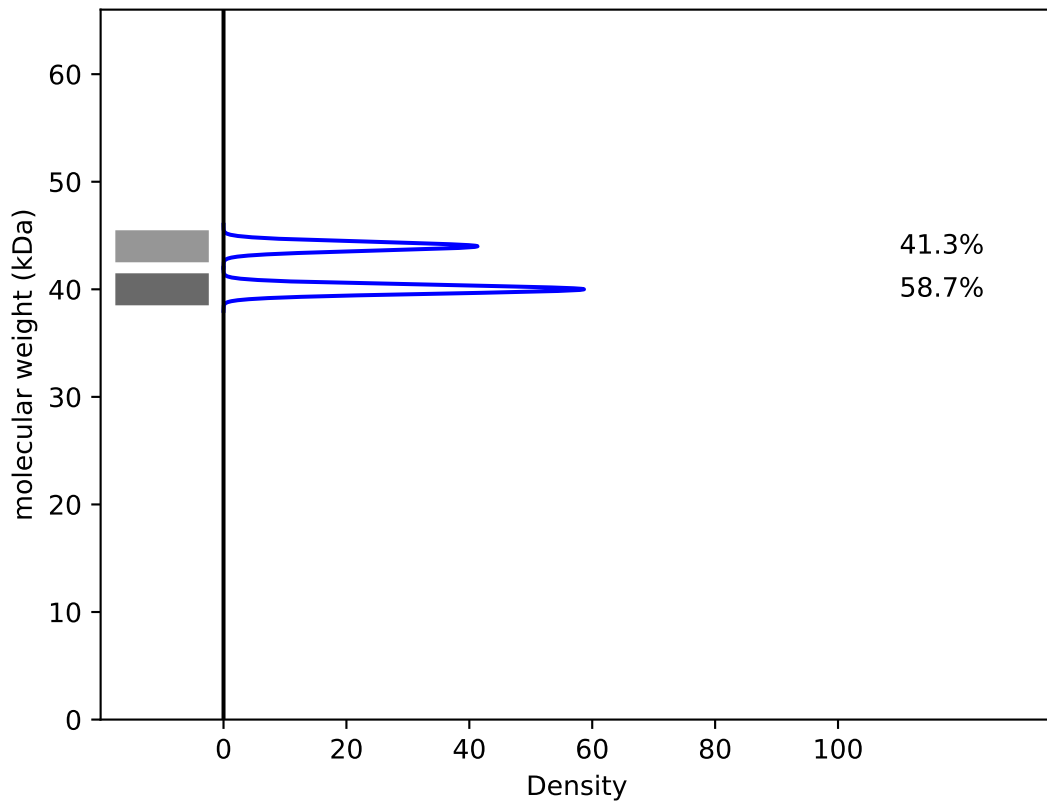

# Q9Y2T2

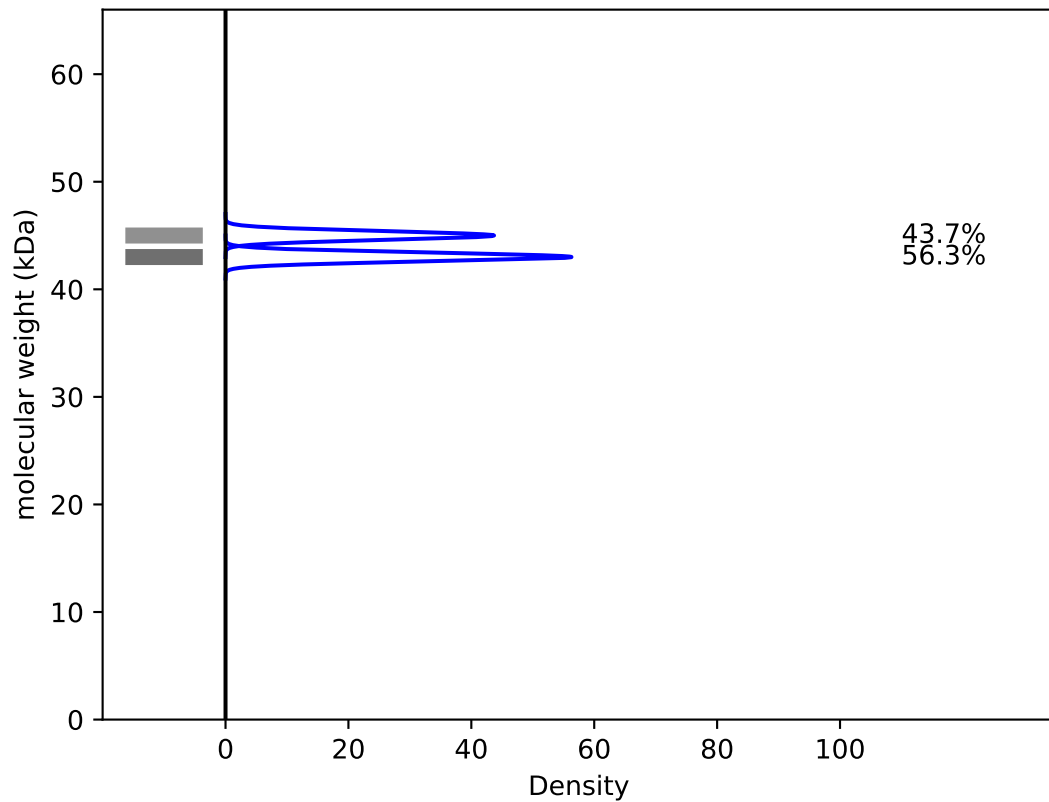

P53677

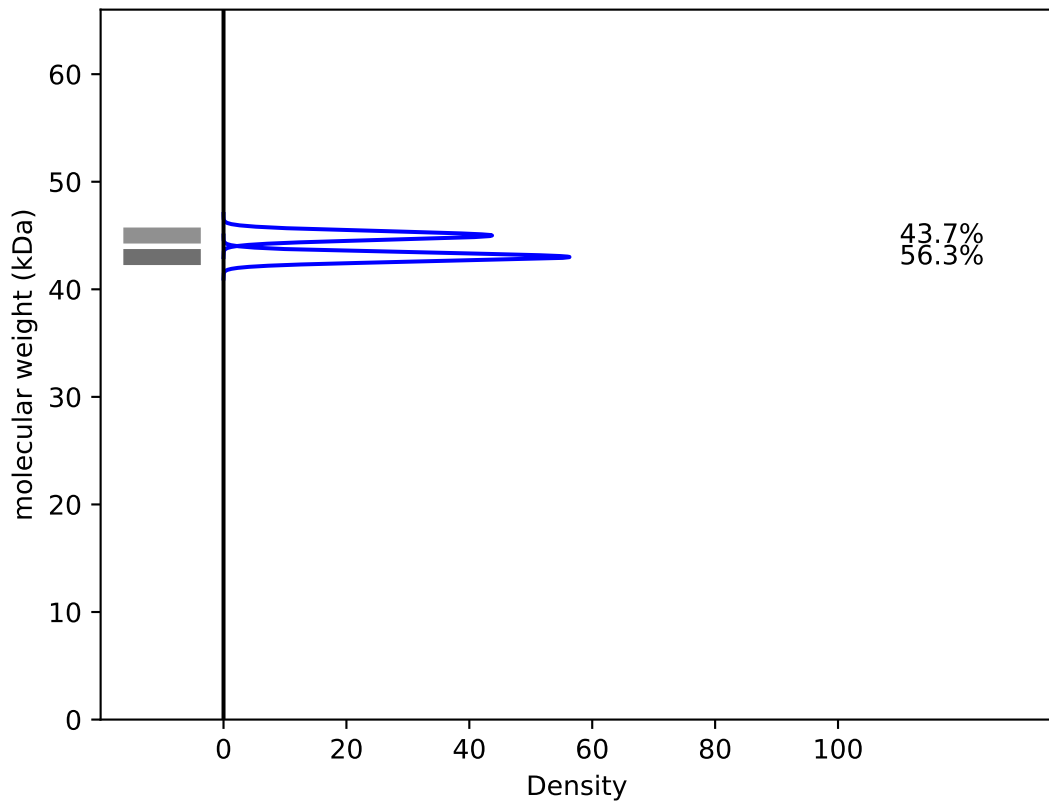



# Q9Y2Z0

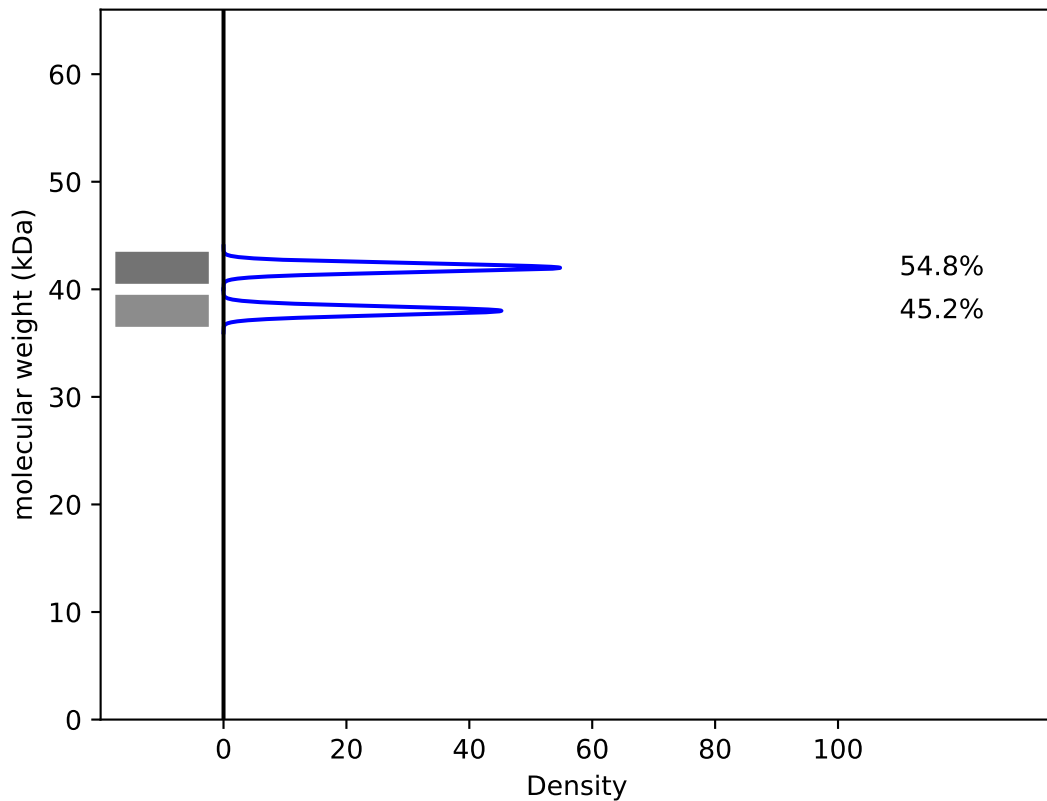

# Q9Y305

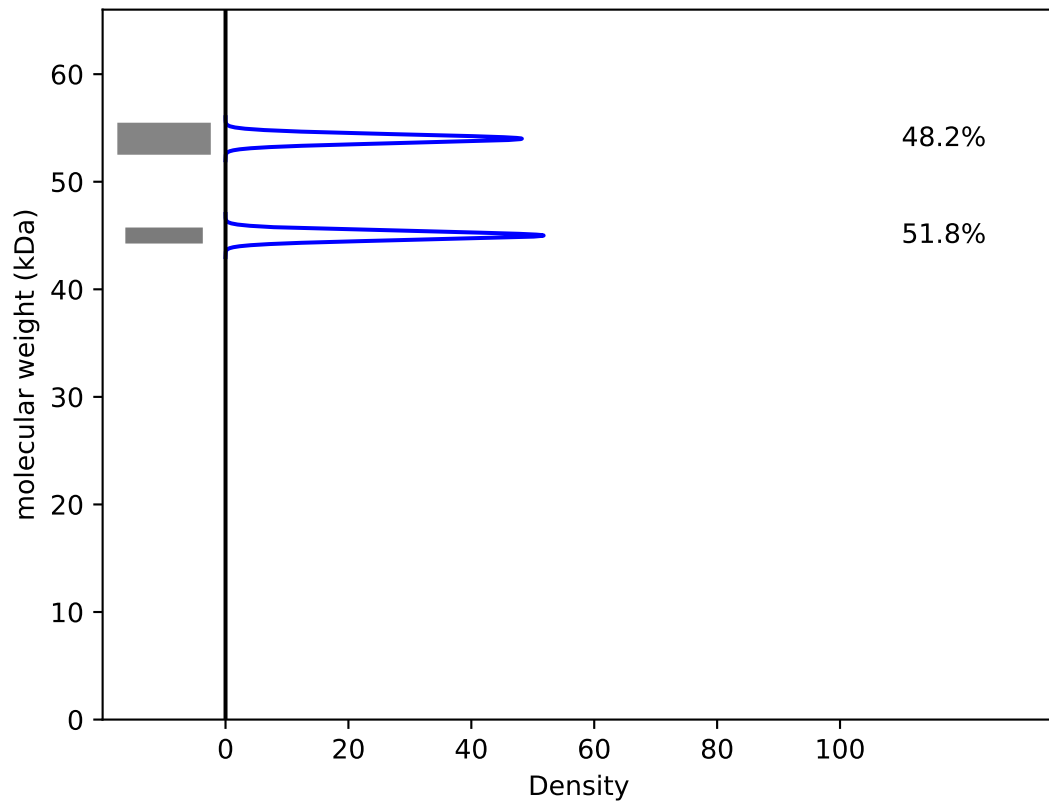

# Q9Y312



# Q9Y315

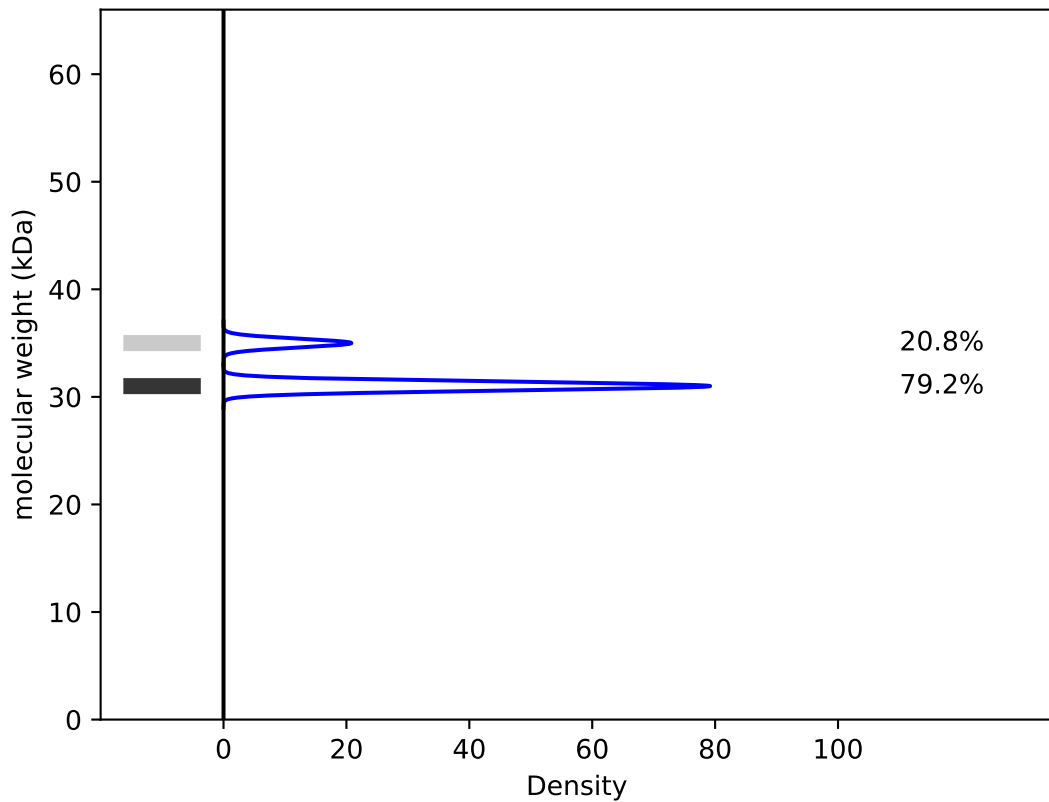

# Q9Y376

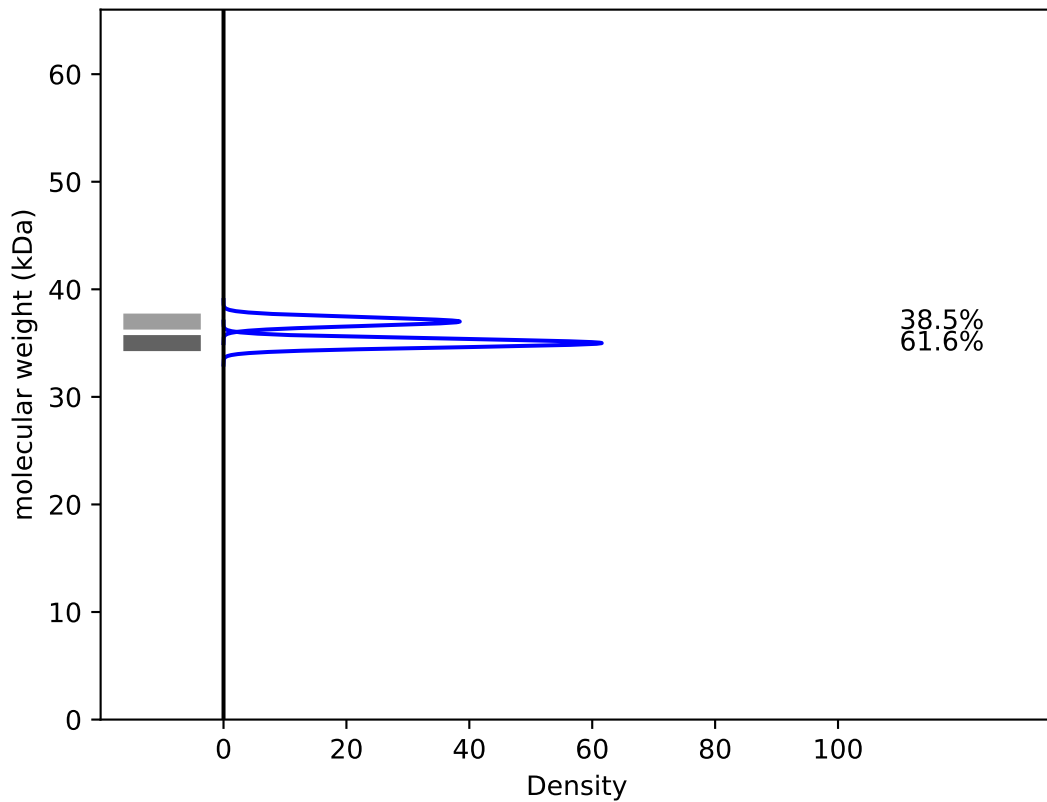

# Q9Y399



Q9Y3A5



# Q9Y3B3





Q9Y3B7



Q9Y3D9



# Q9Y3F4

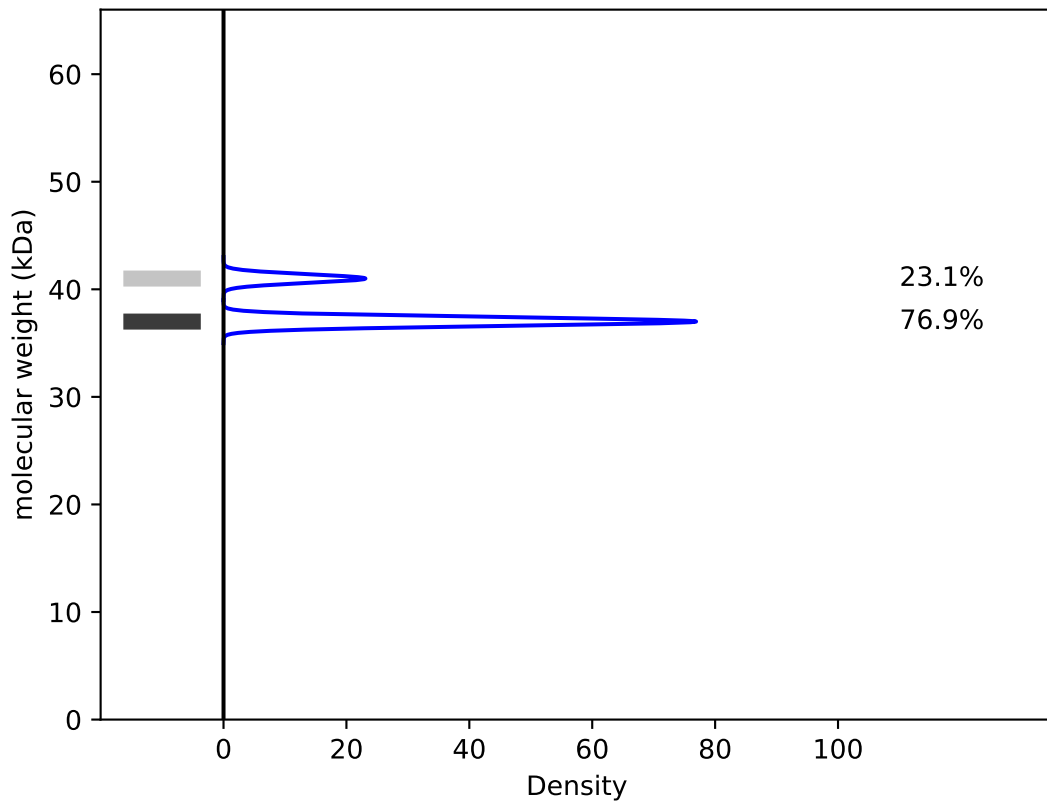

# Q9Y3I0



Q9Y3Y2



Q9Y4P3



Q9Y547



# Q9Y570

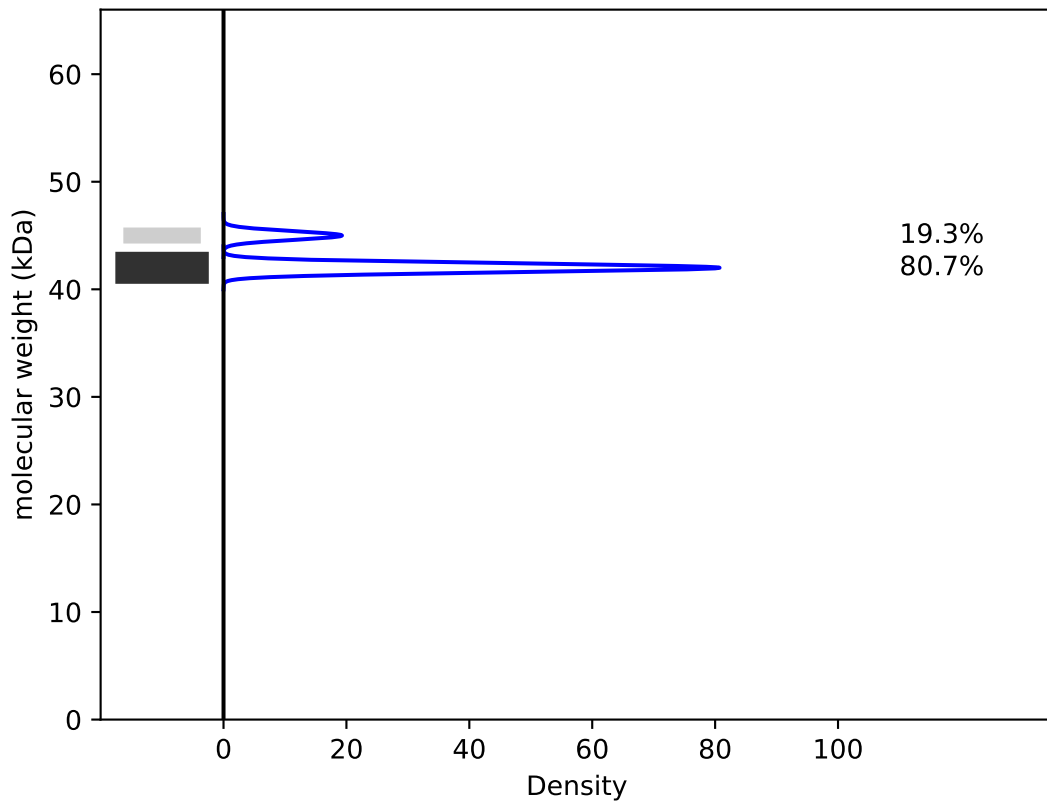



# Q9Y580



# Q9Y5B8



# Q9Y5K5

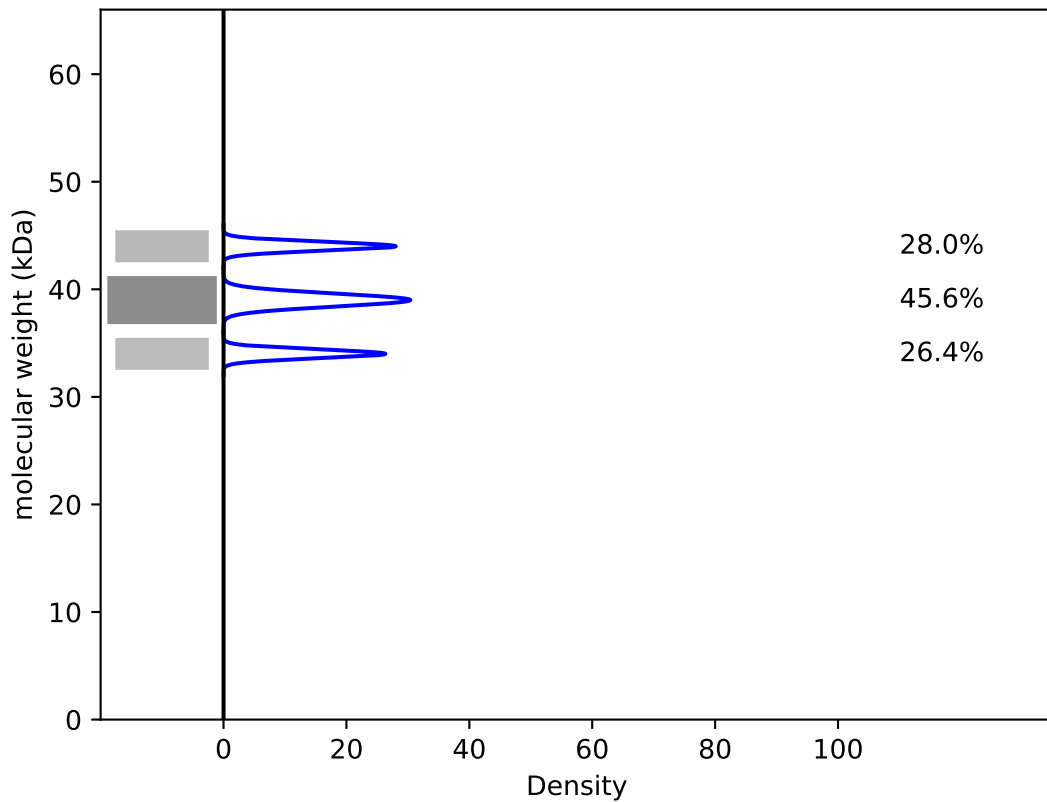

Q9Y5K8



# Q9Y5M8

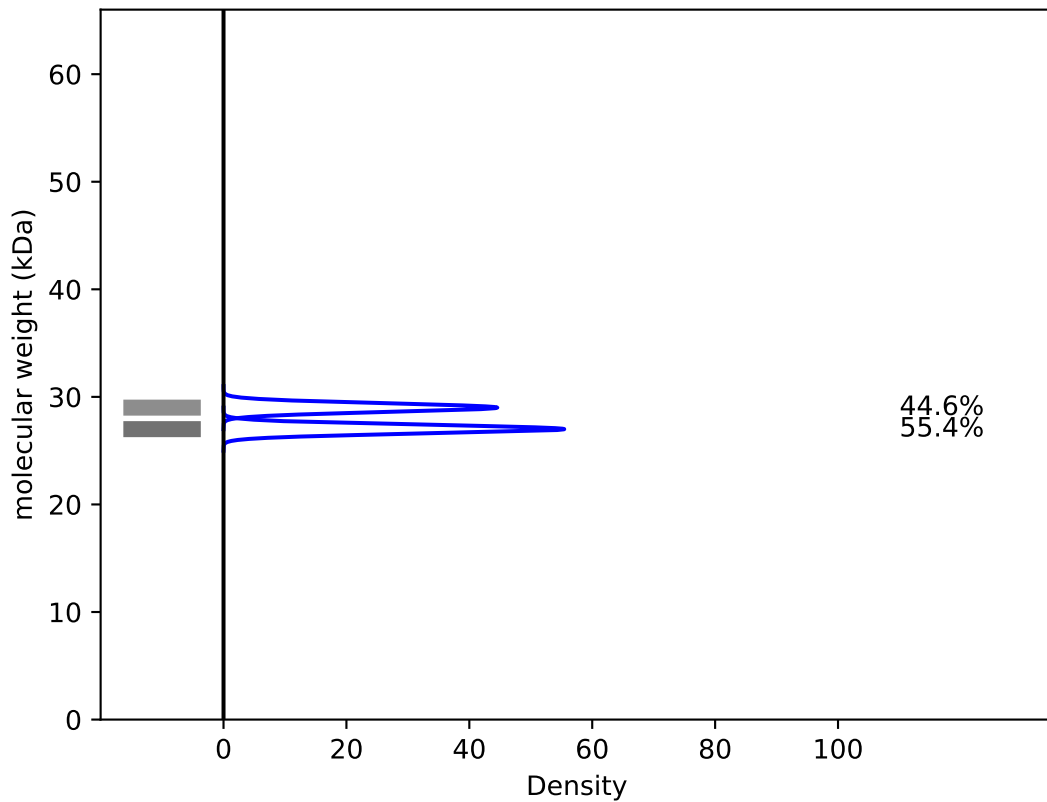

Q9Y5Q8



# Q9Y5S9



Q9Y5X3





# Q9Y5Y2

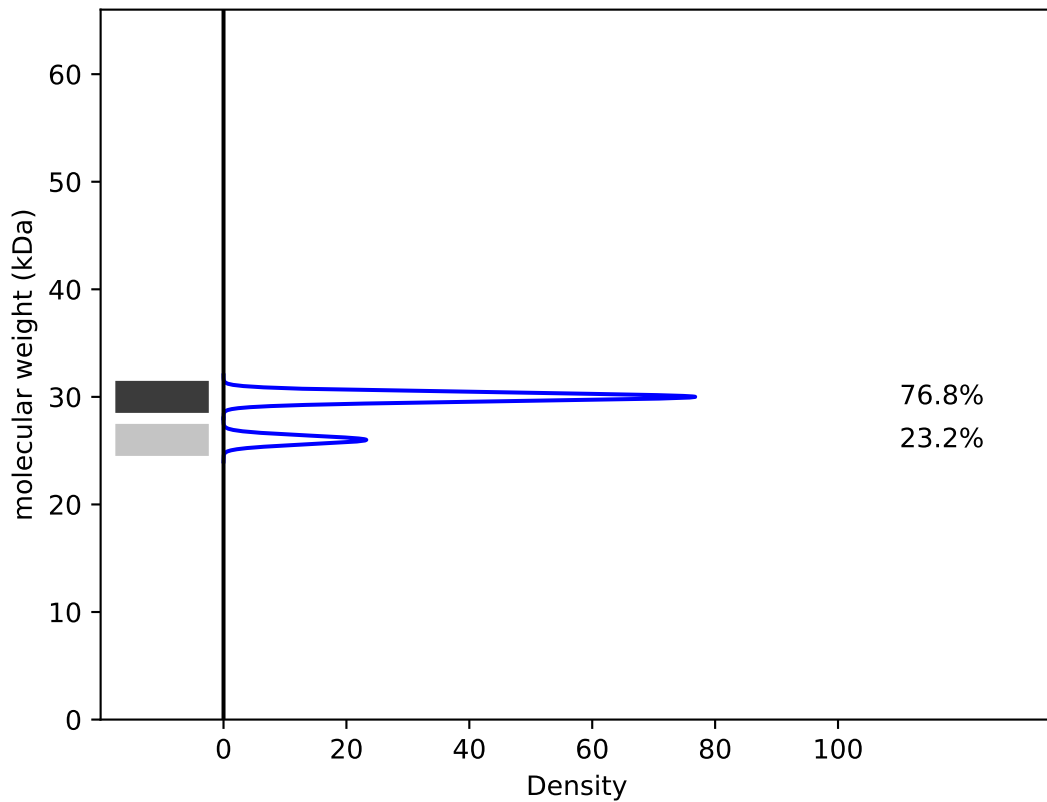

Q9Y5Y5



# Q9Y606



# Q9Y617



# Q9Y676

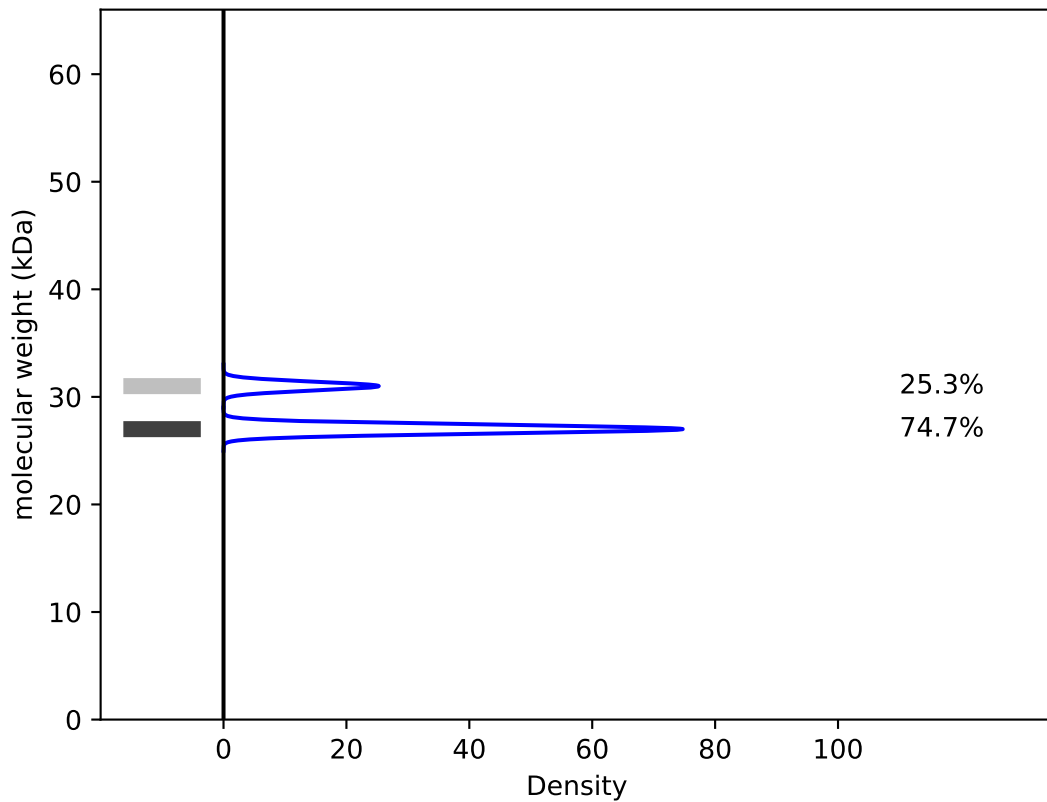

# Q9Y696



# Q9Y6A4



# Q9Y6C9

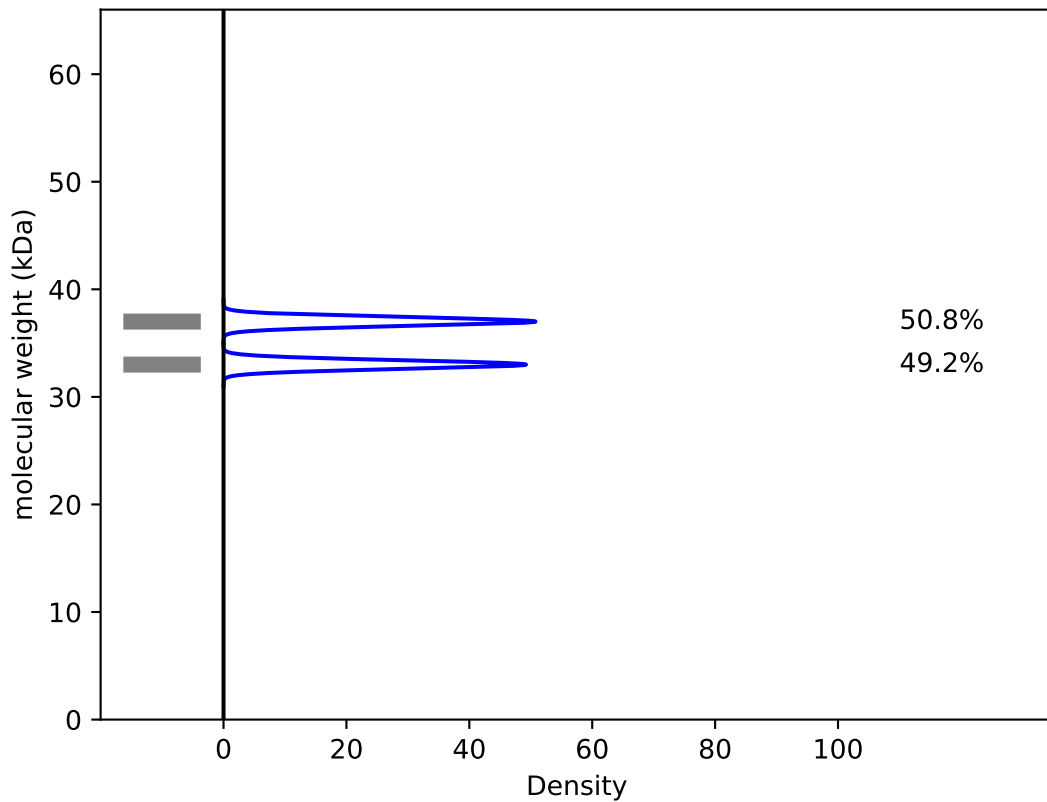



Q9Y6E2



# Q9Y6I9

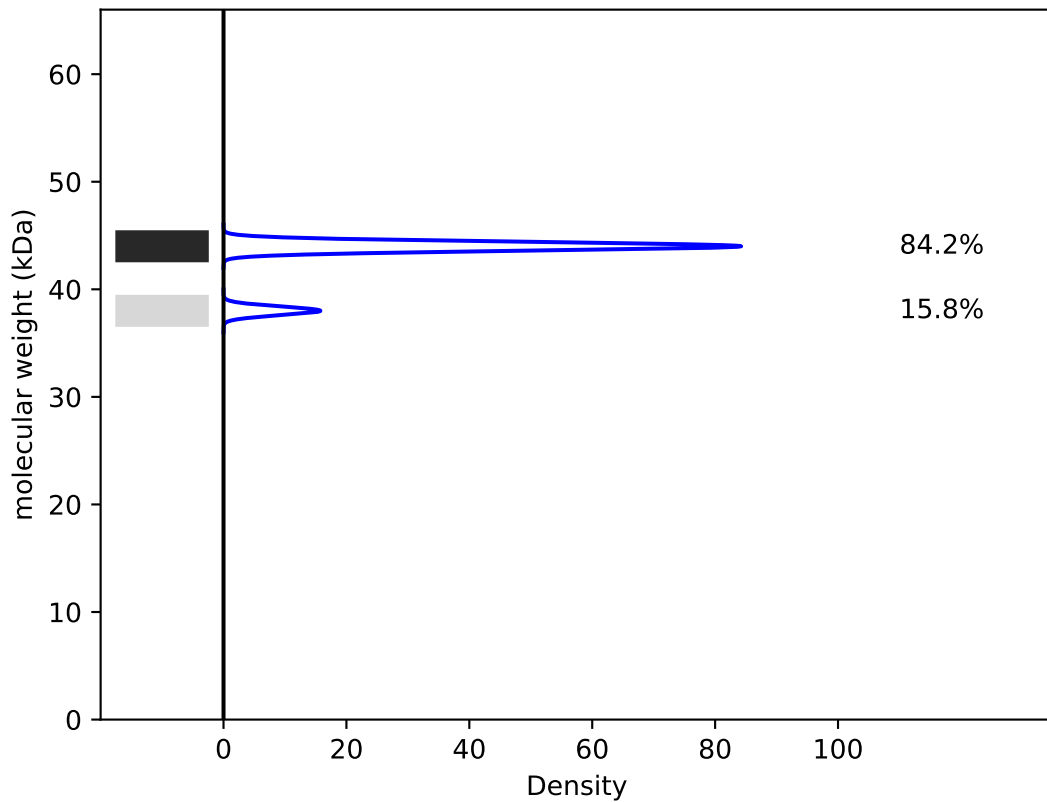

Q9Y6M9



Q9Y6N5



# Q8NHM4

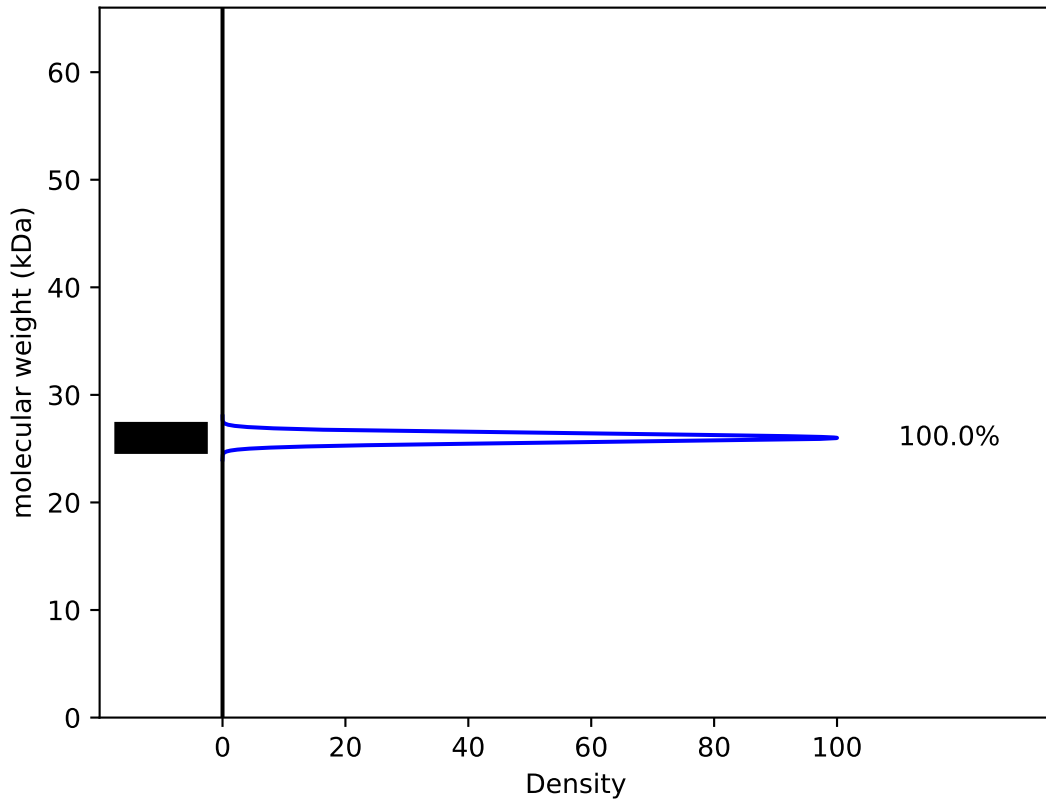

P07478



P07477



P02649

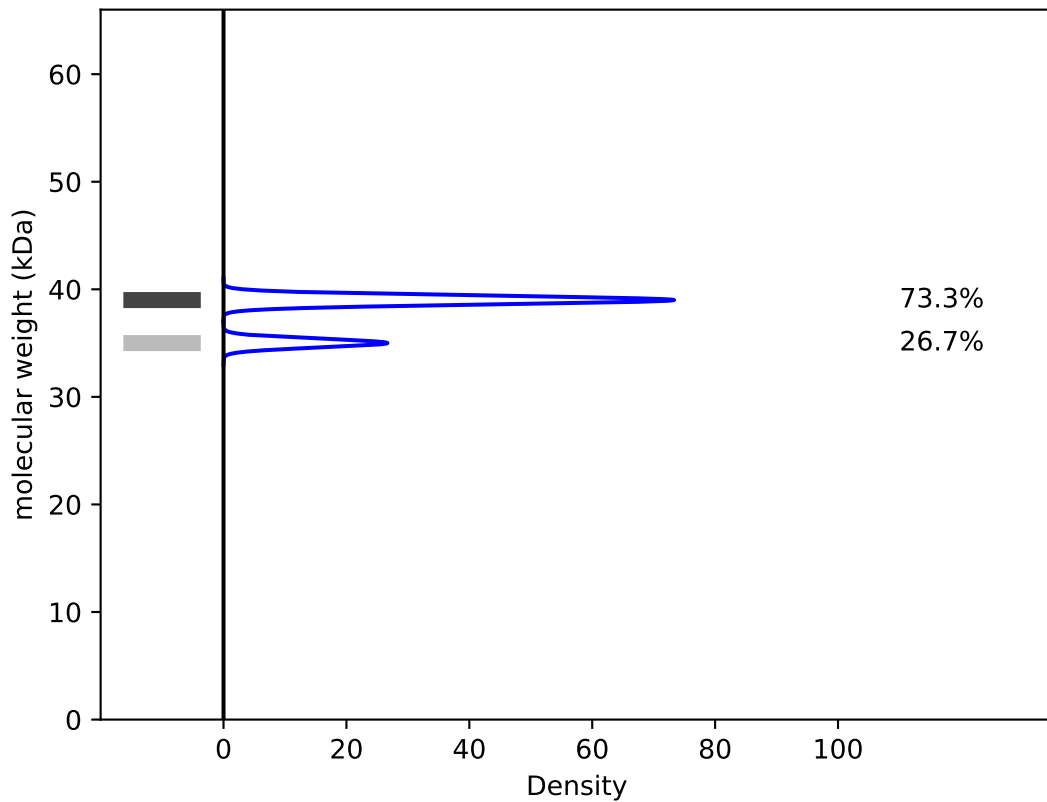



P08729

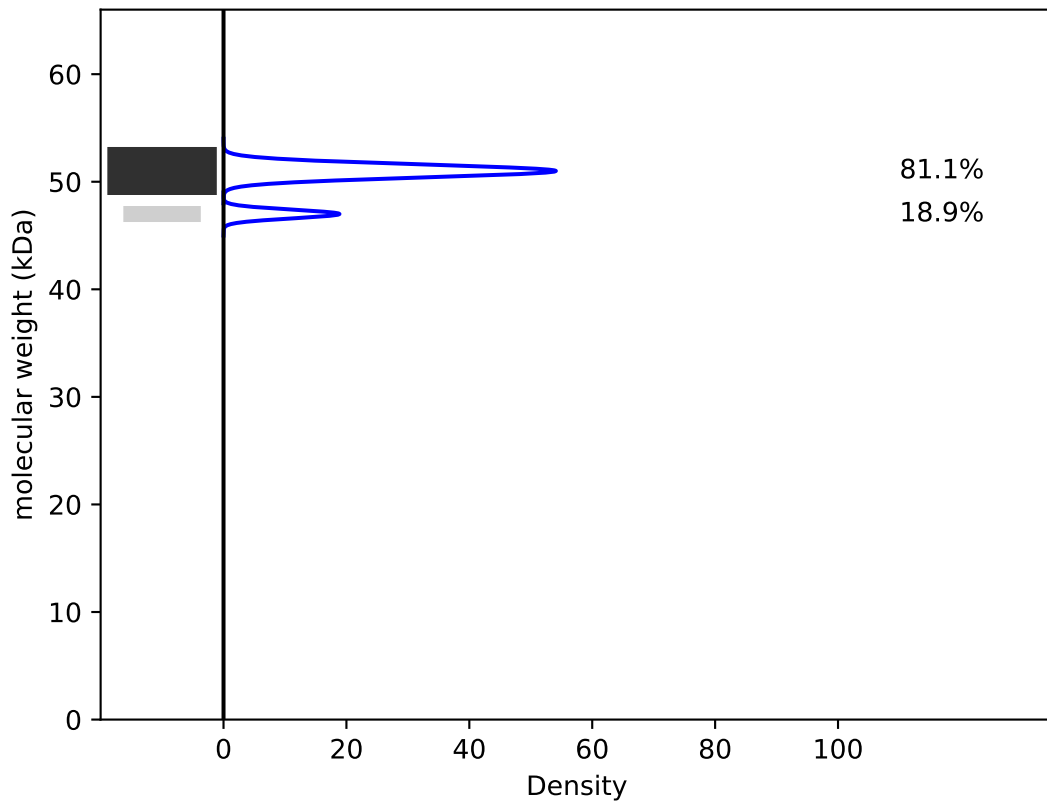

A4D1E9



# A6NDG6



O00148



O00151



O00154

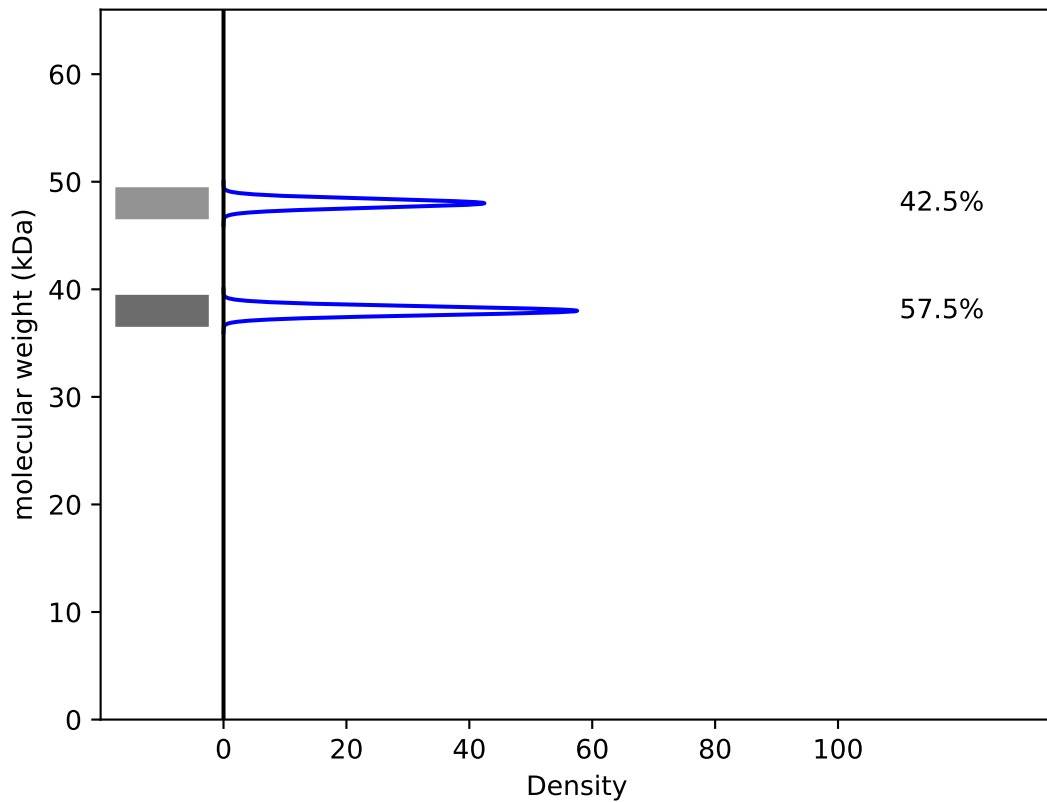

O00165



O00217





O00231

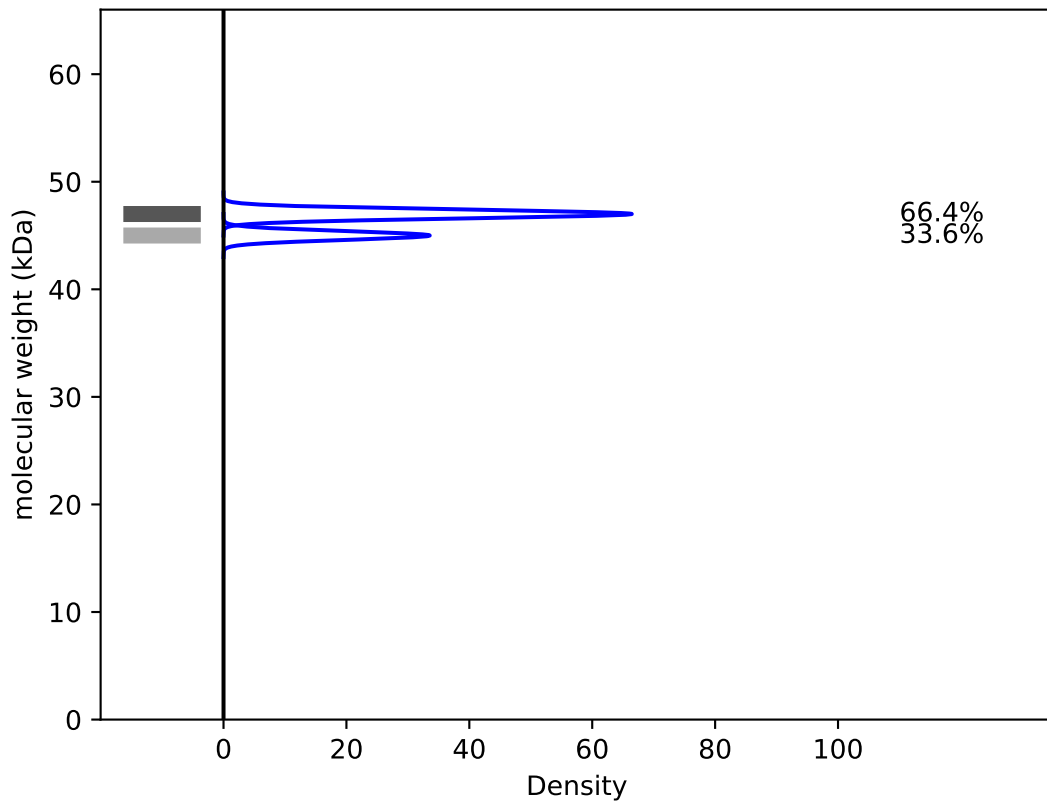

000232

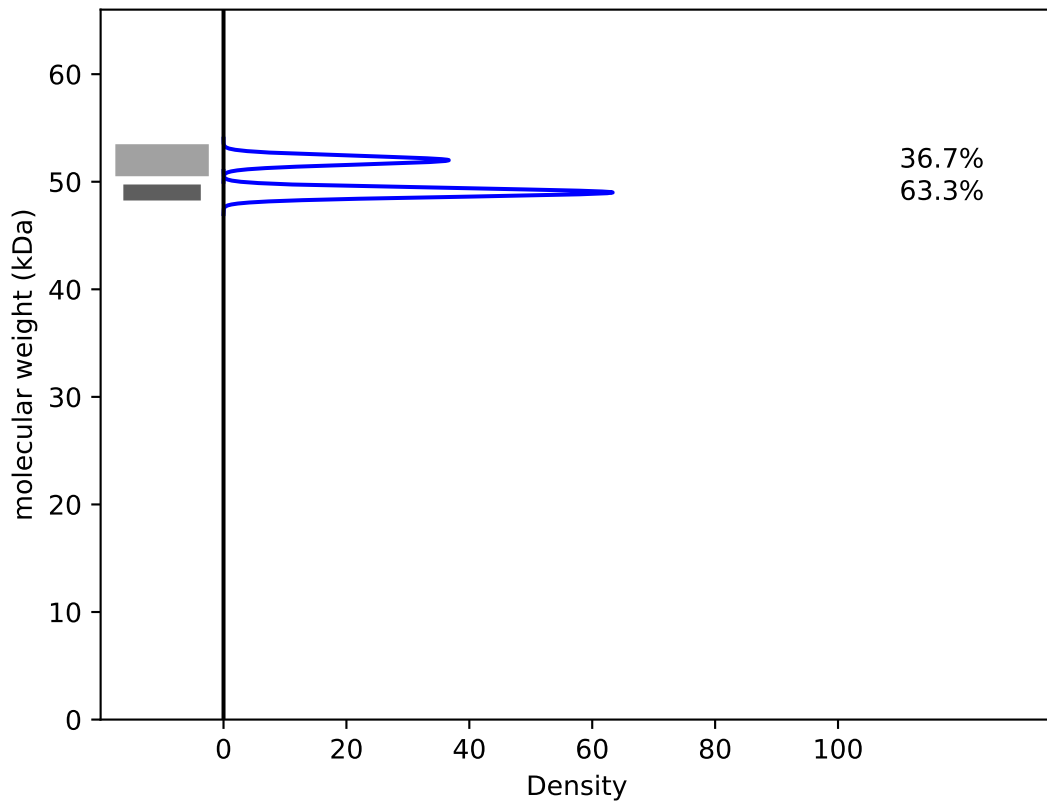

O00264

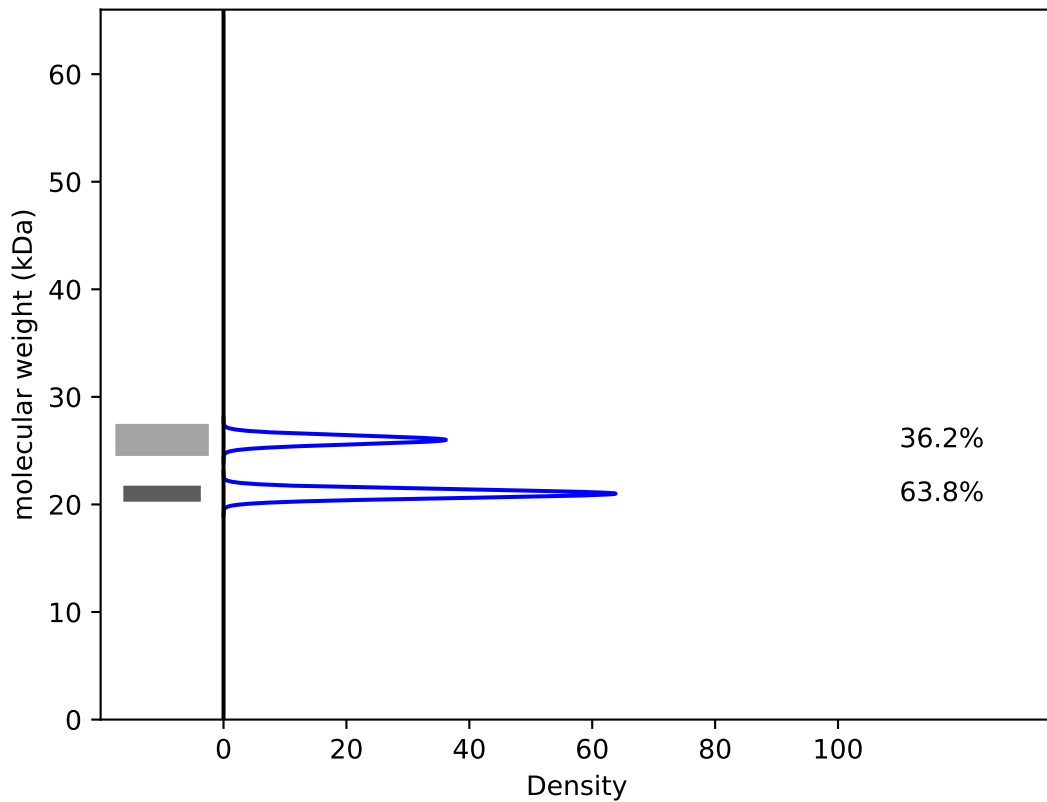

O00273

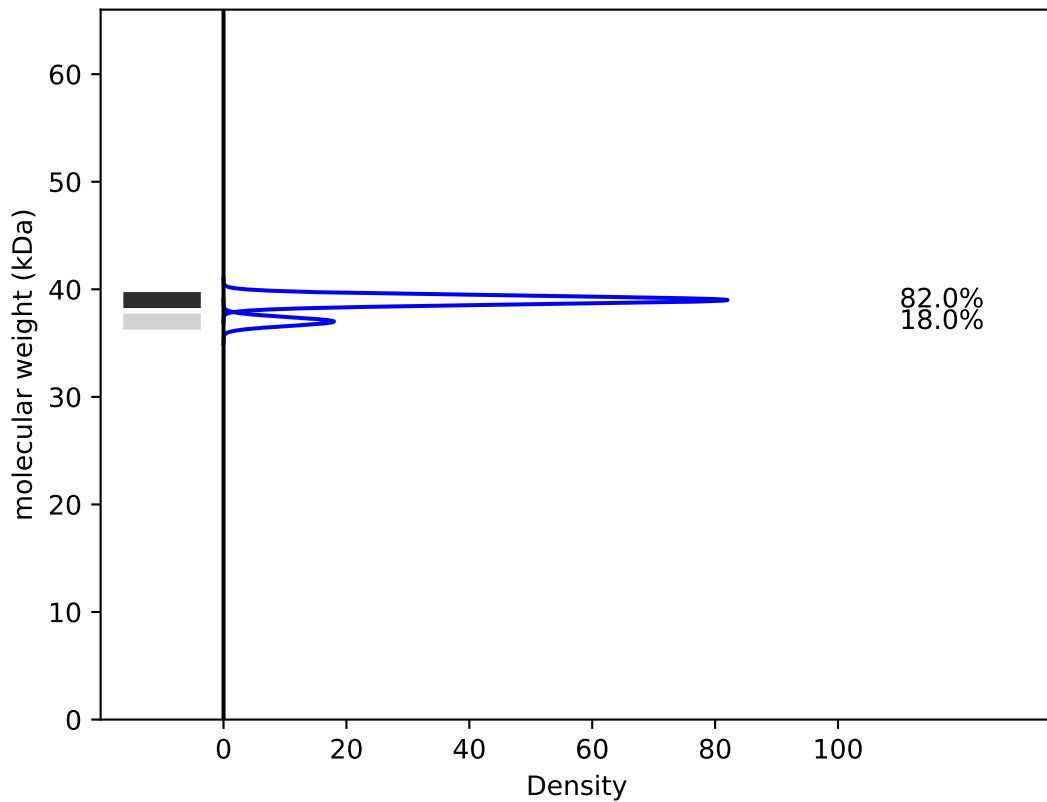

000299



O00442



O00487



O00560

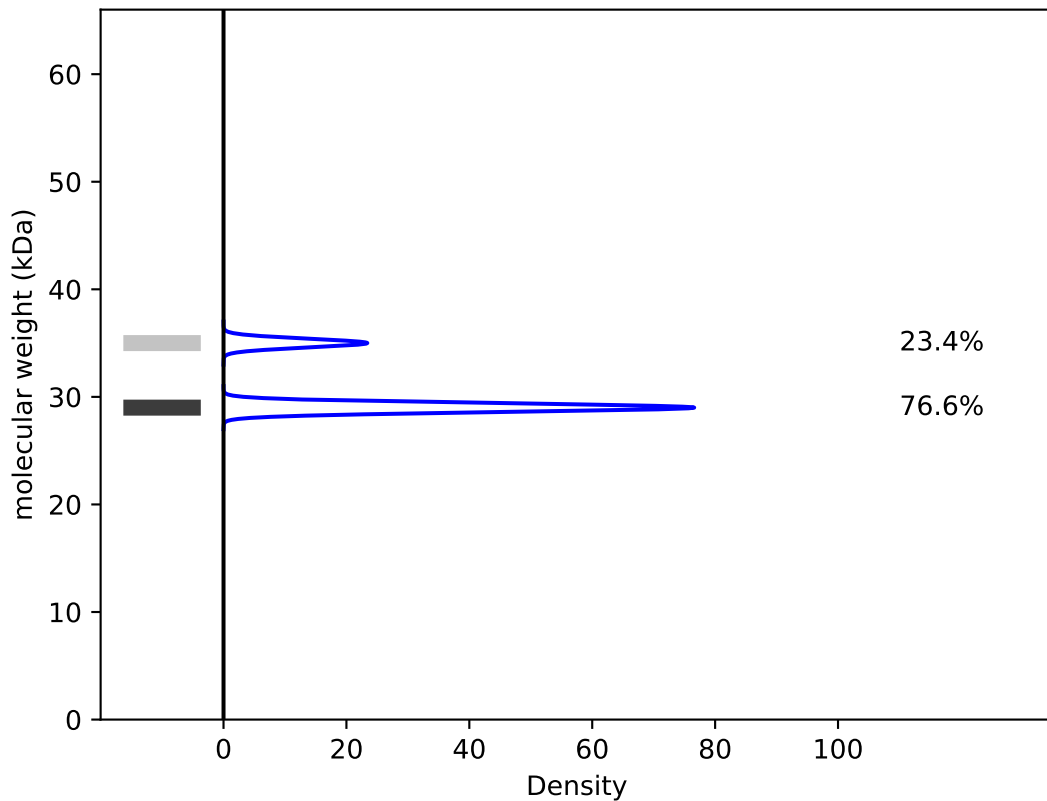



O00625



O00629



O00743

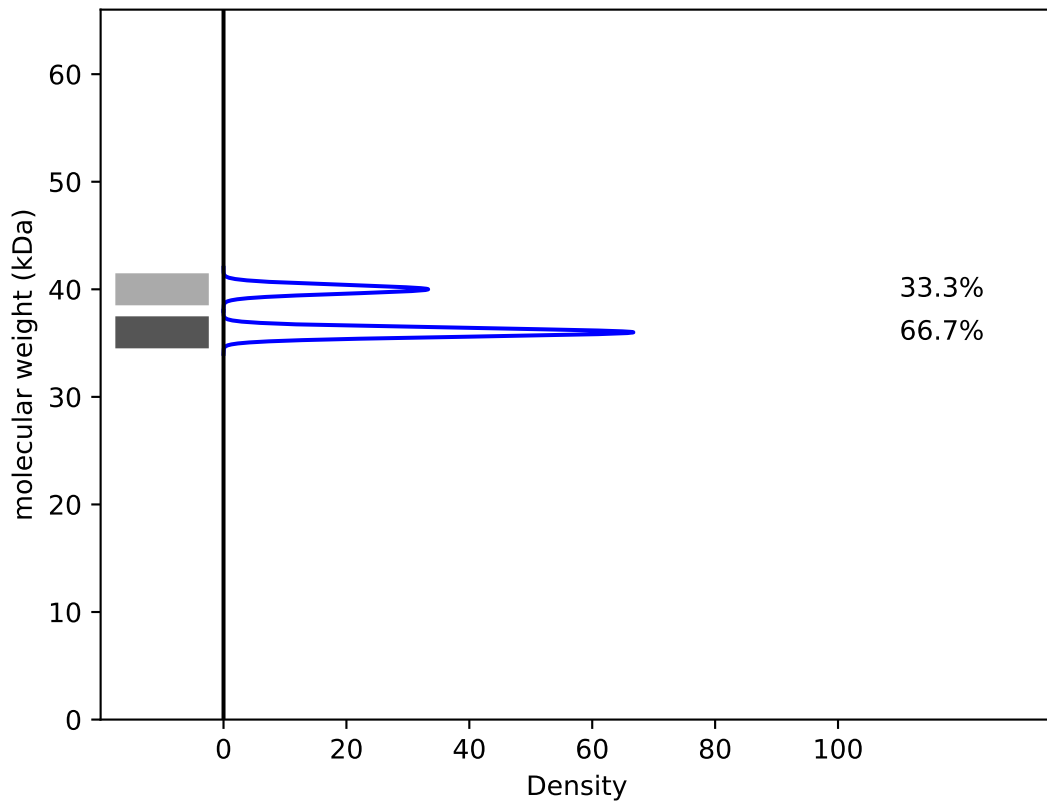

O00764

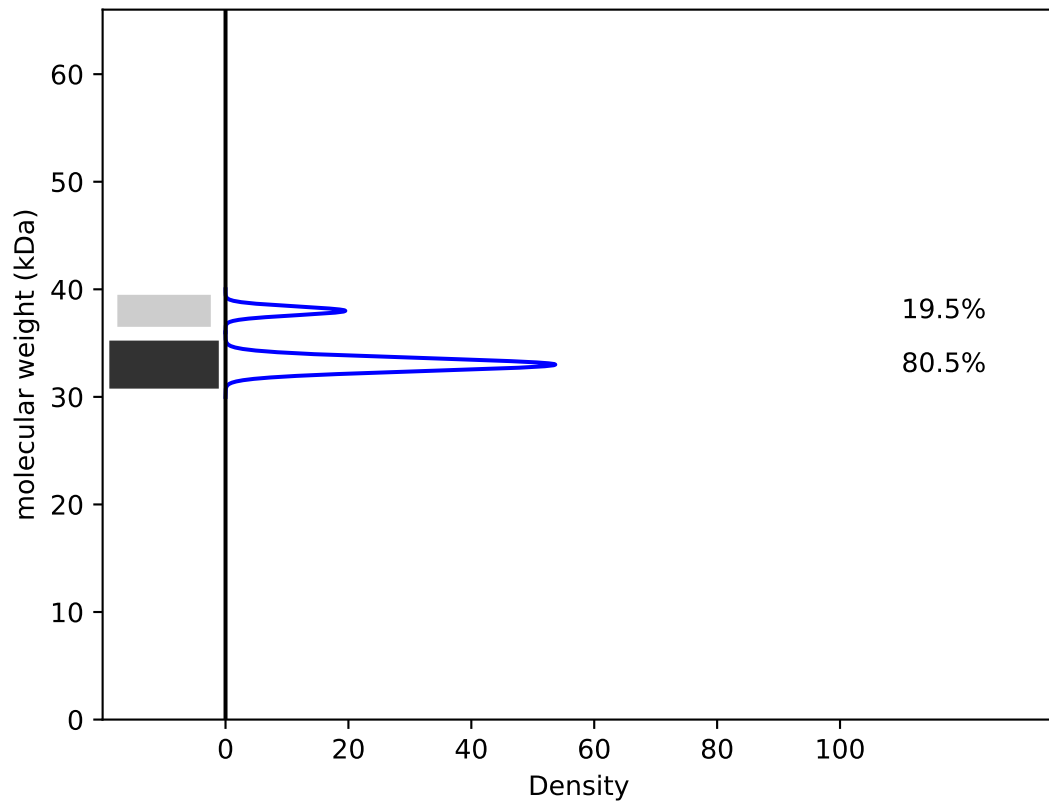

O14579



O14657



# O14684

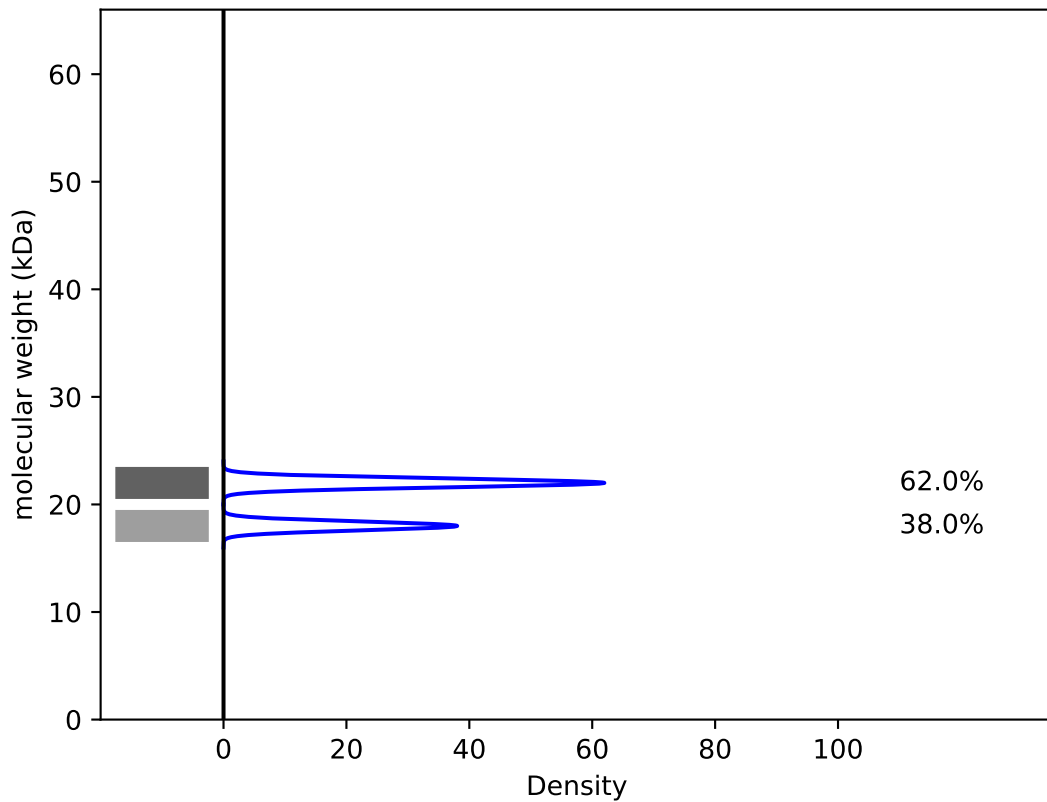

O14732

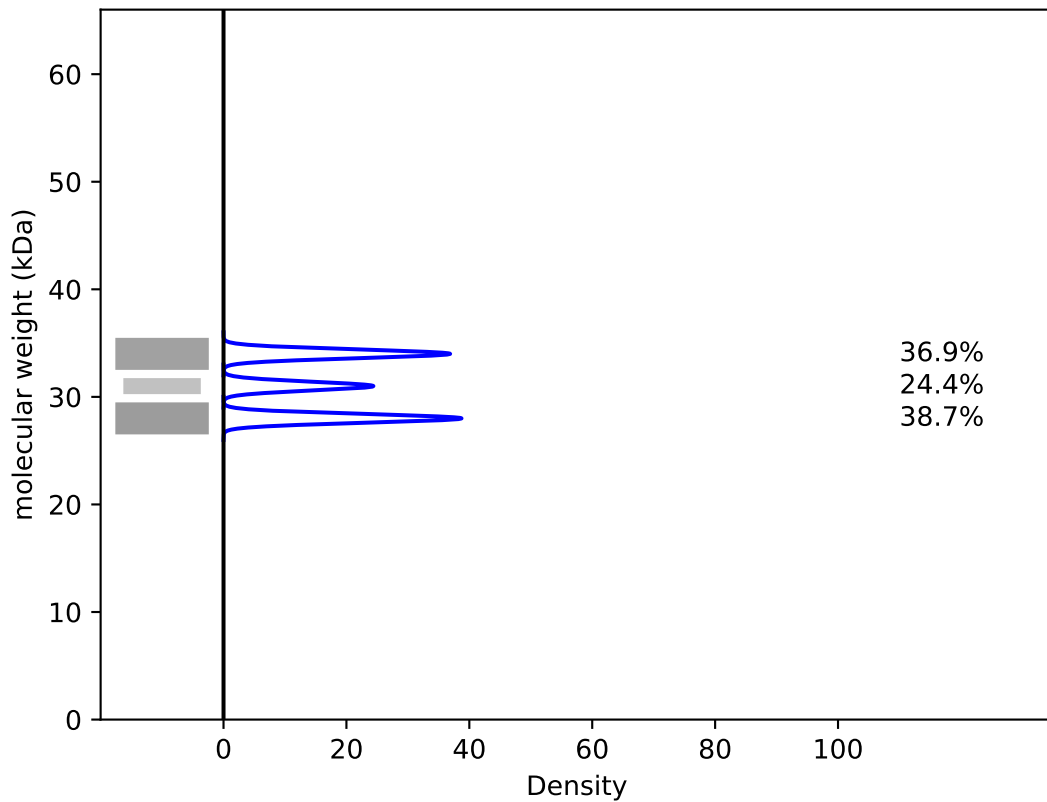



O14818



# Q8TAA3



O14828



O14880



O14908



O14925

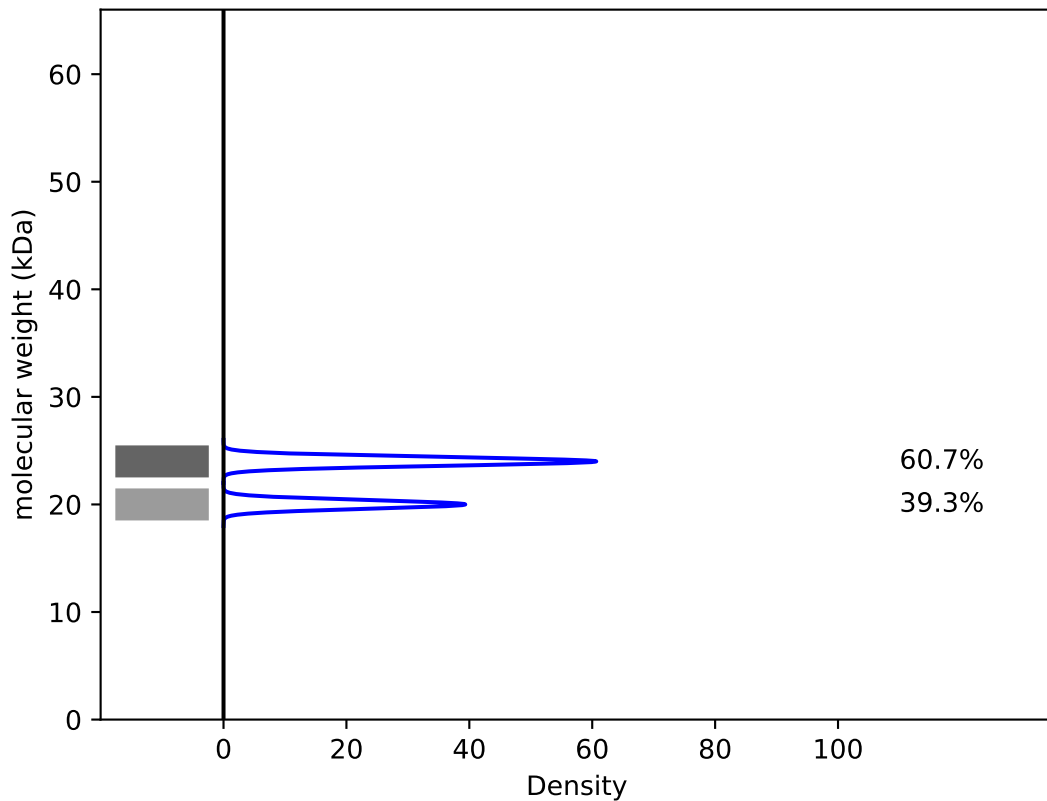

# O14929

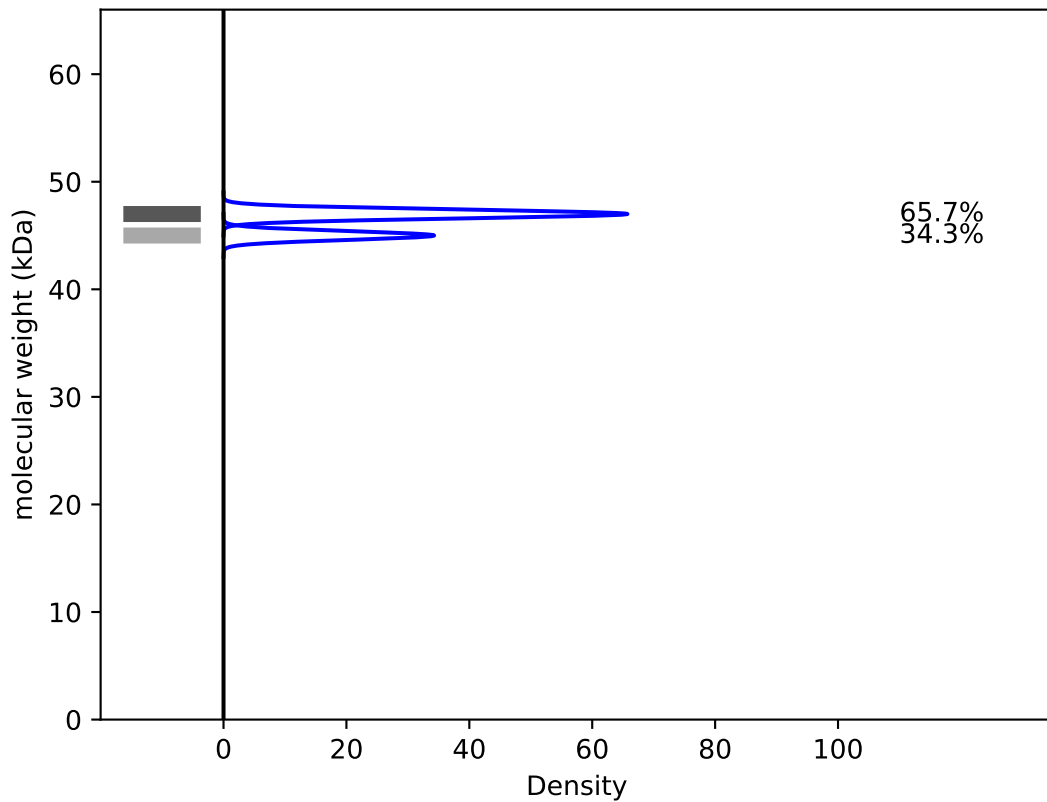

# P19105

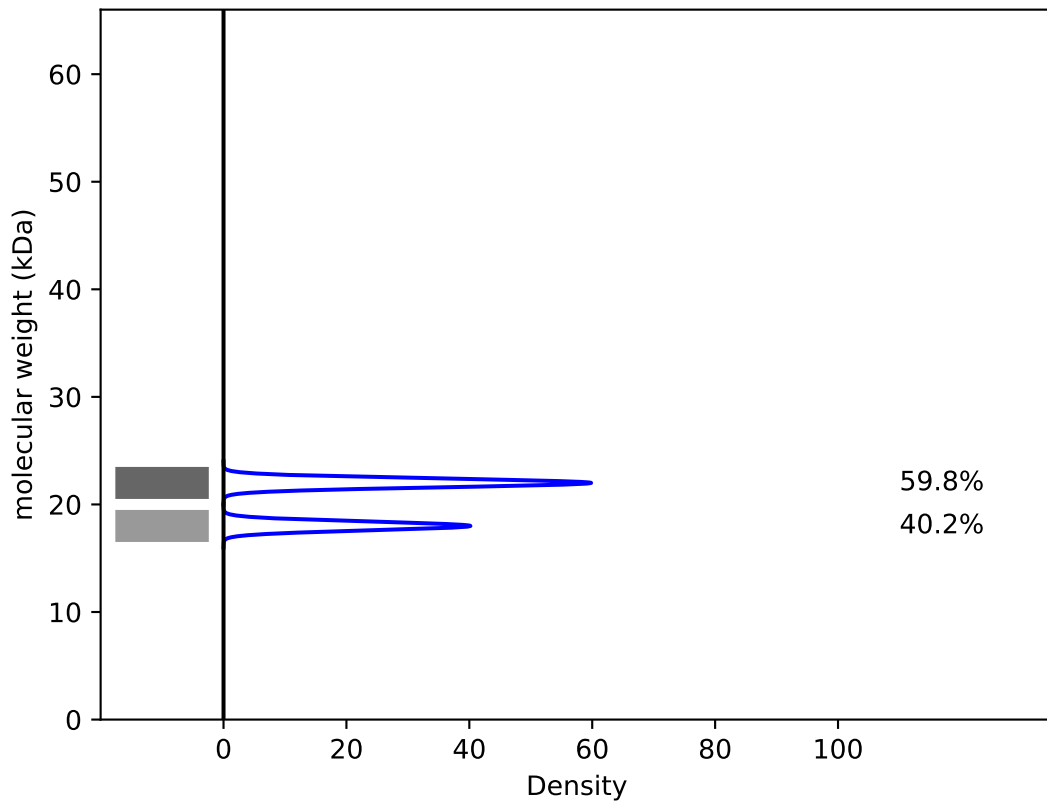



# O14950



# P24844



# O15145

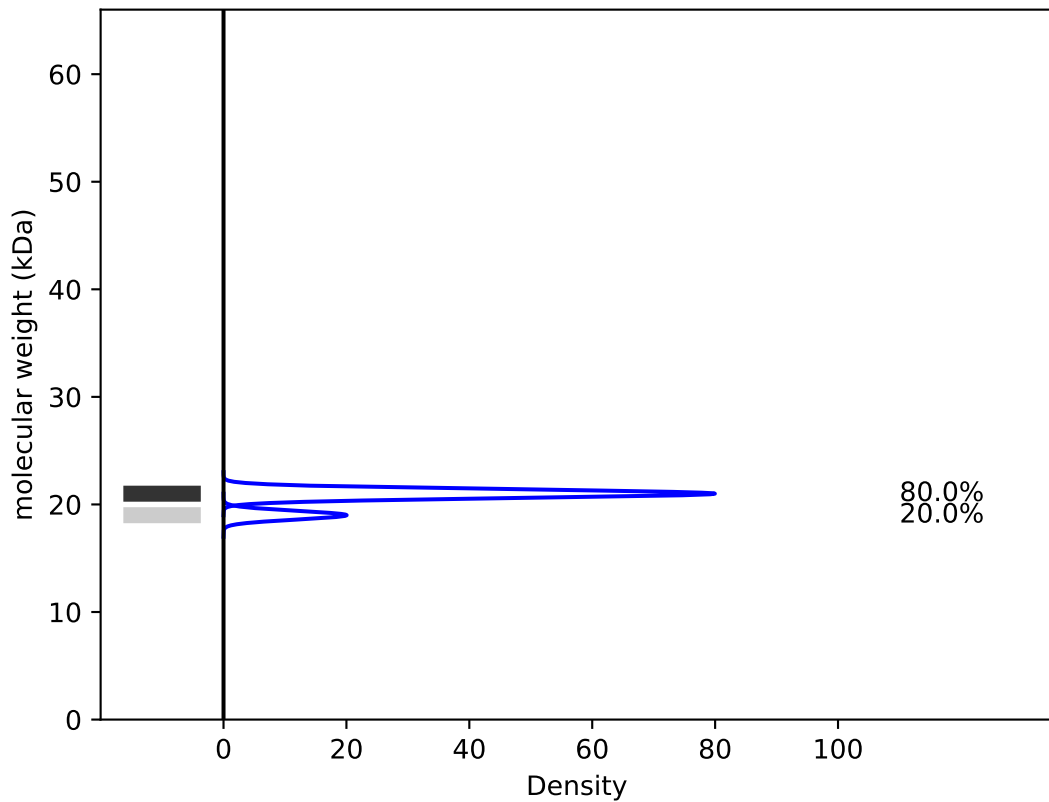

# O15160



# O15173

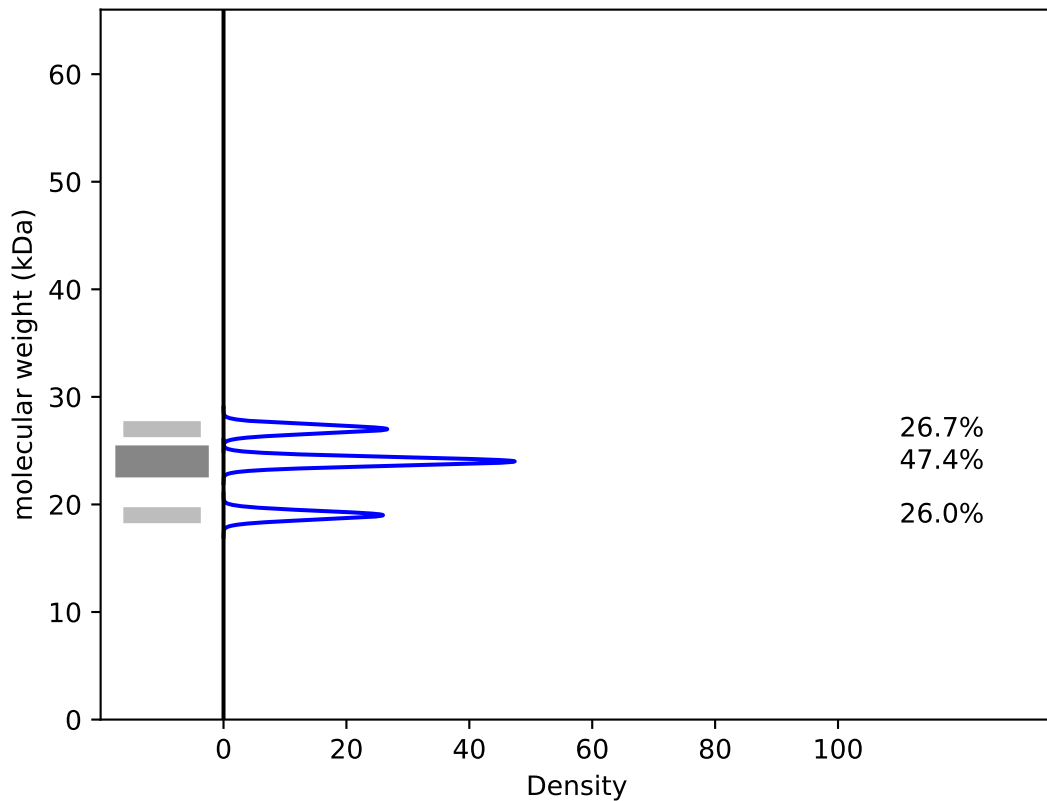

# O15269



# O15372

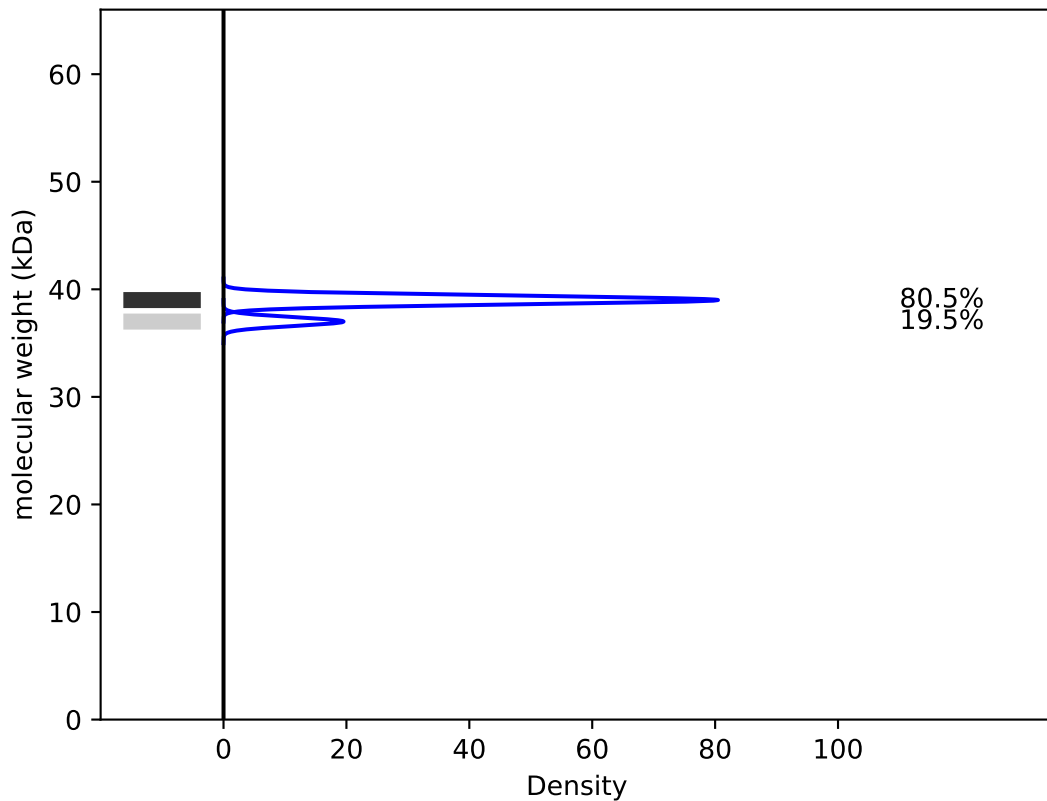

# O15460





# O15498



O43169



O43172



O43175

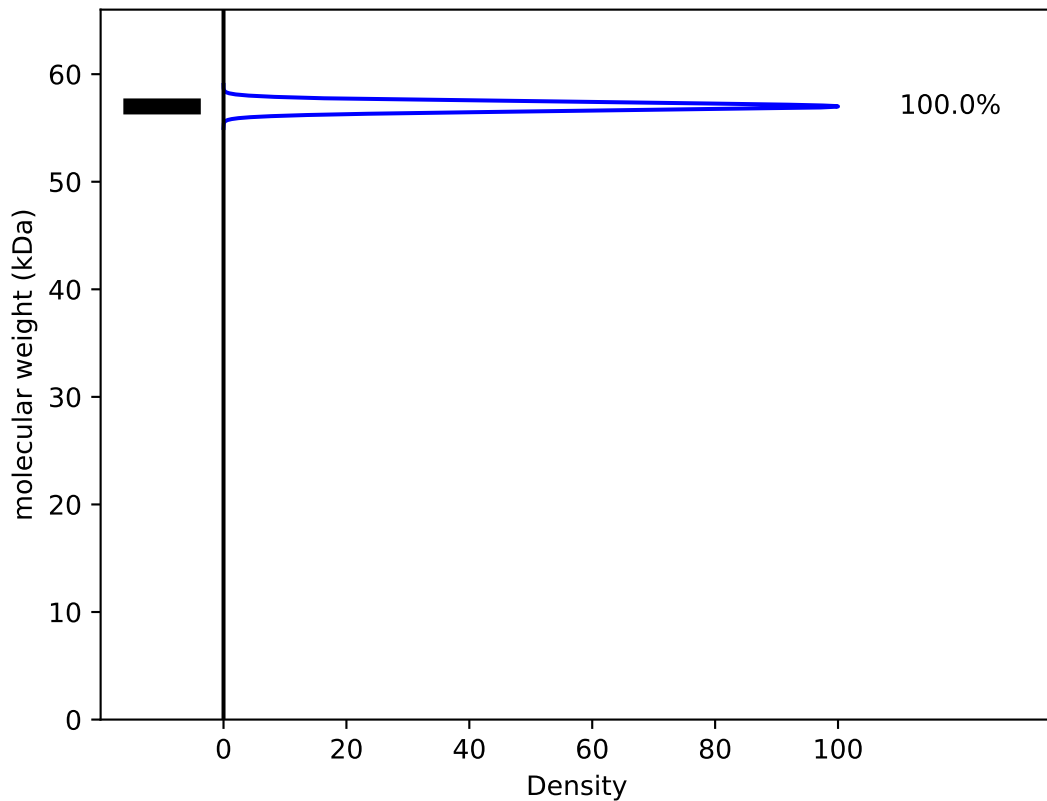

O43324

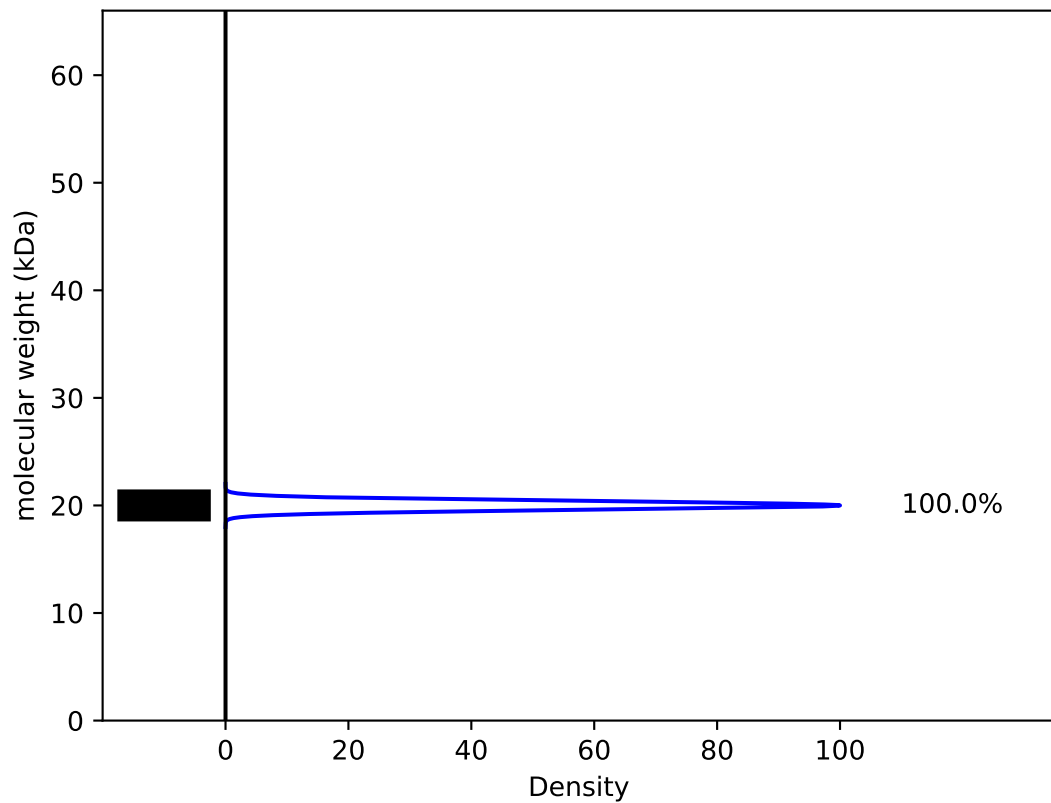

O43396



O43399



O43488

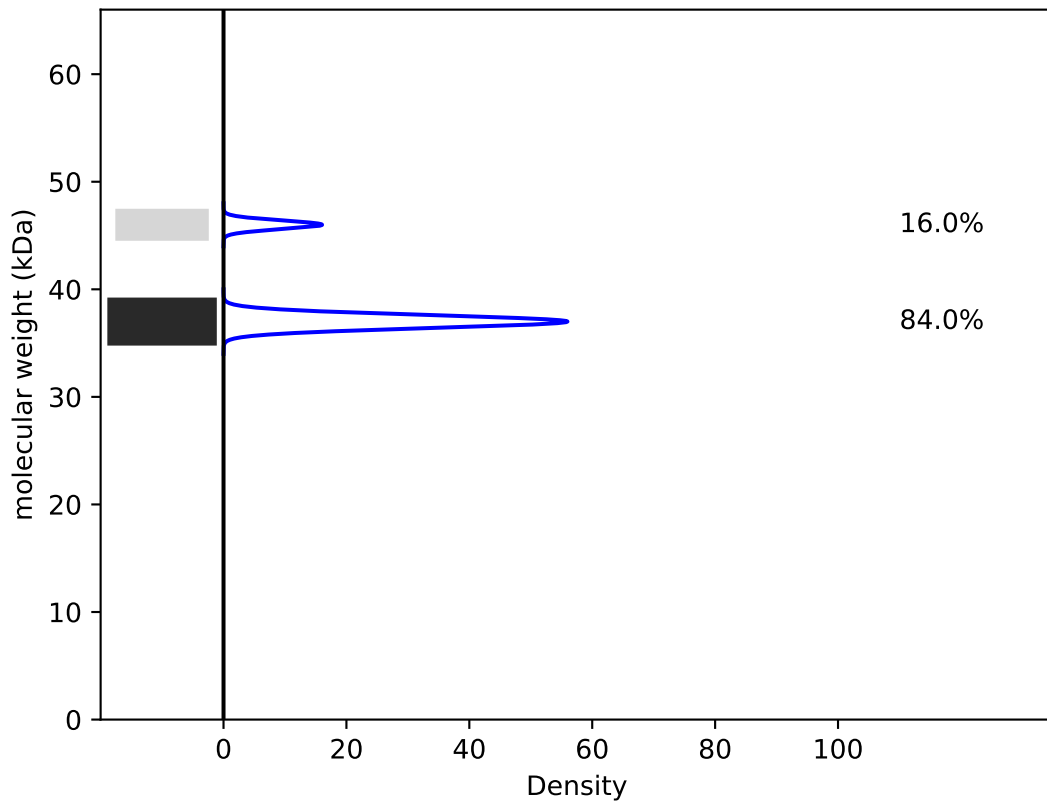



# Q8NHP1

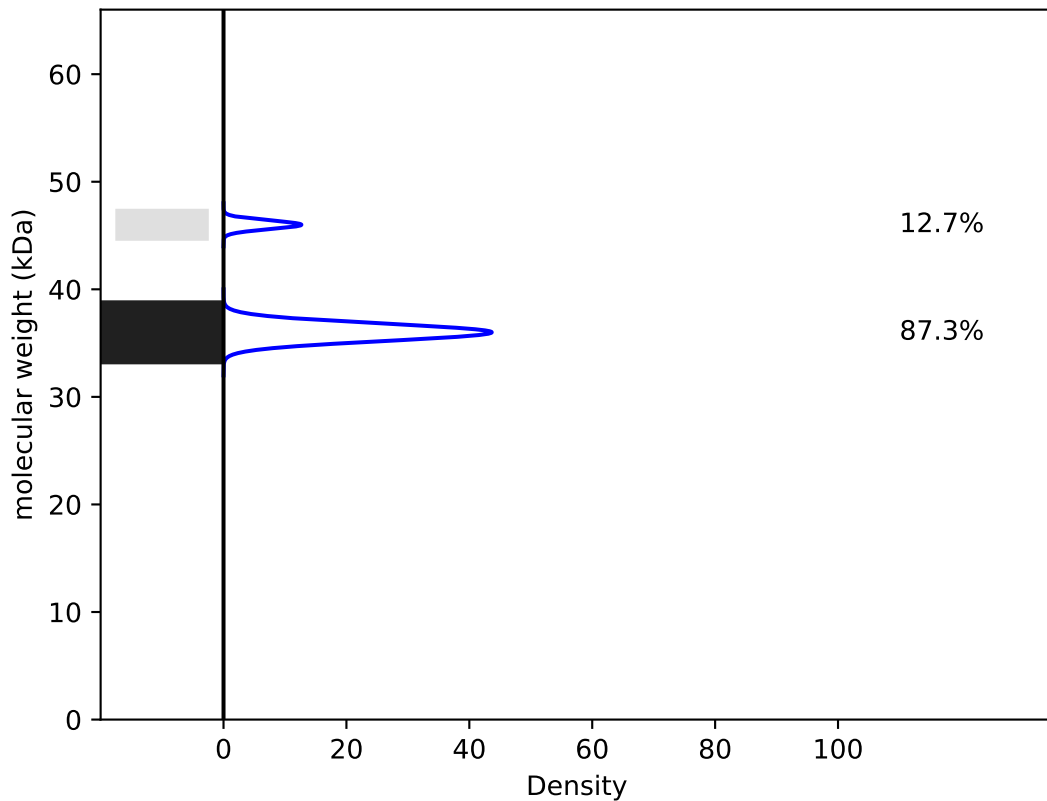

O43598



O43617

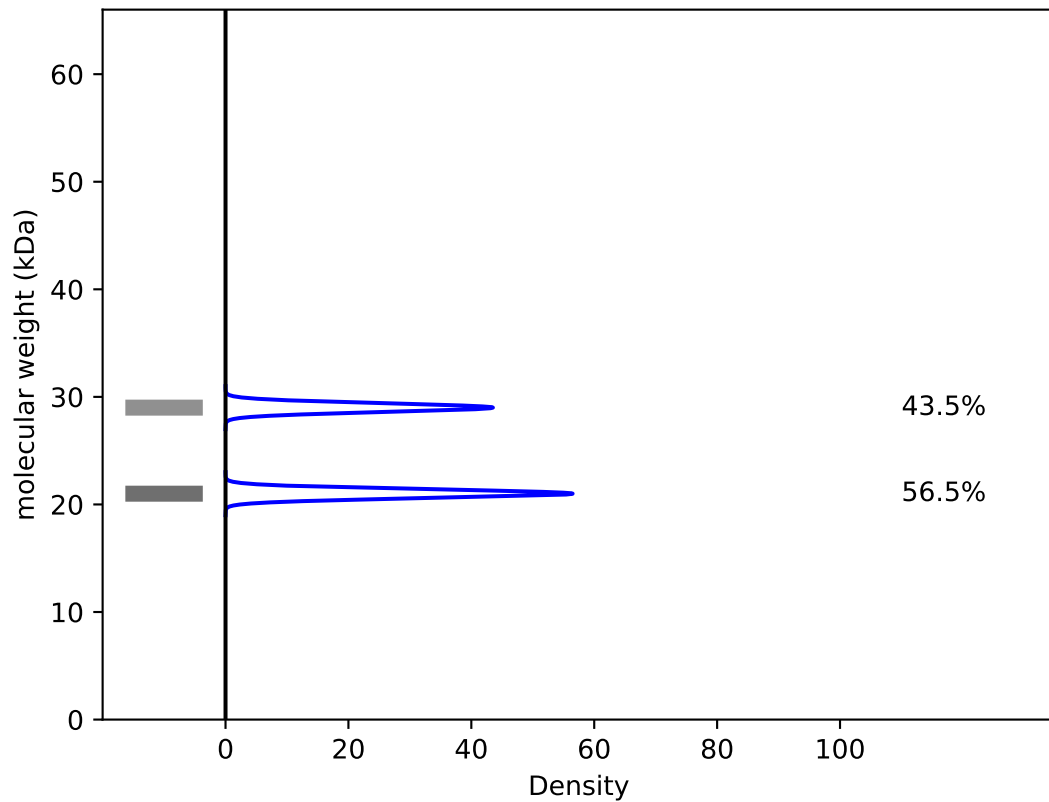

O43681



O43684

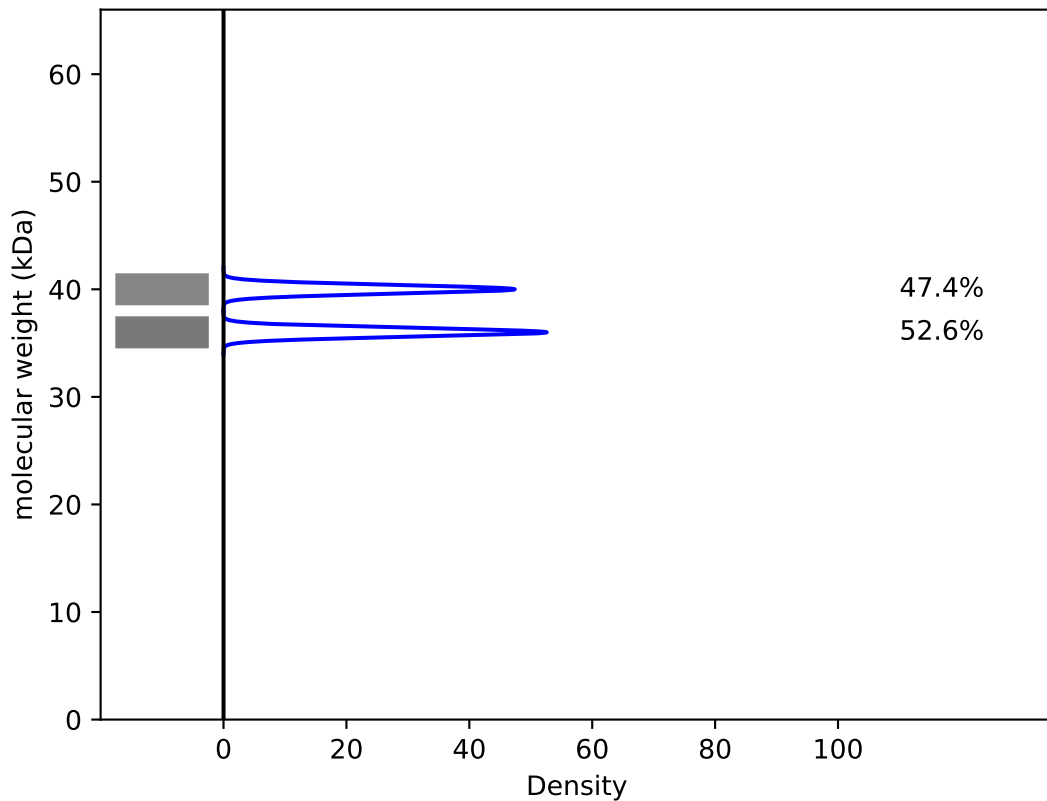

O43709



O43760

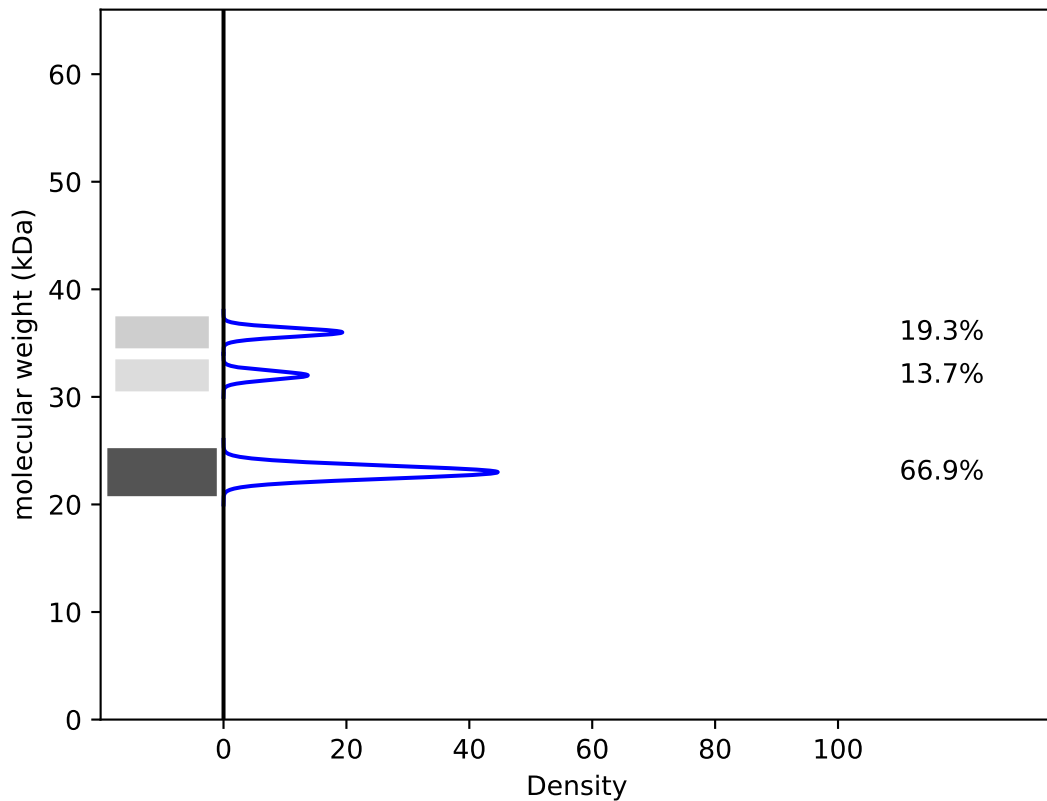

O43765





O43809



O43837



O60256



O60547



O60664

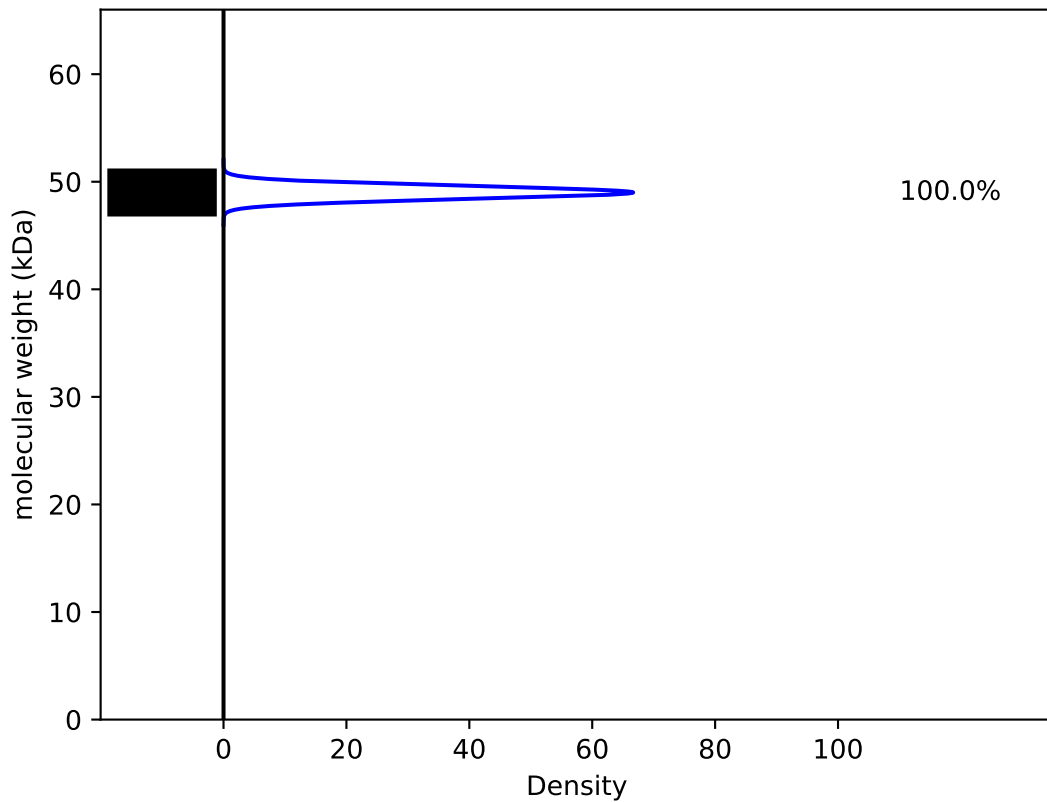

O60684



# P52294

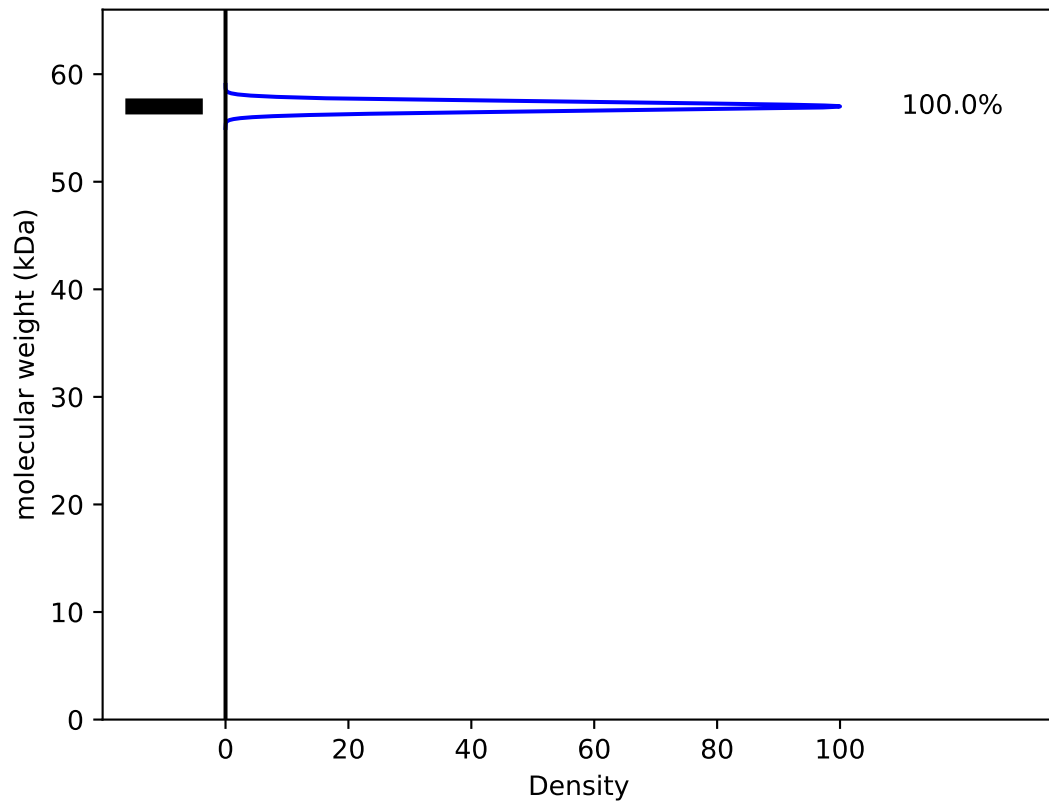

# O15131





O60701



O60762

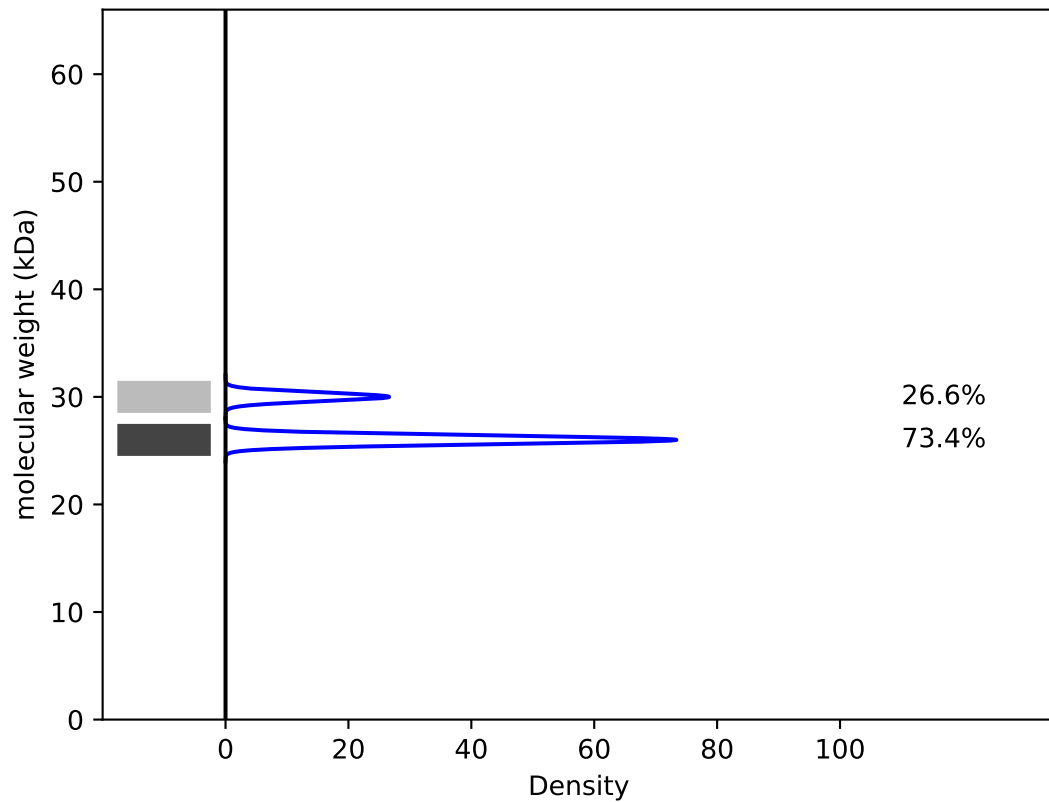

# Q99880

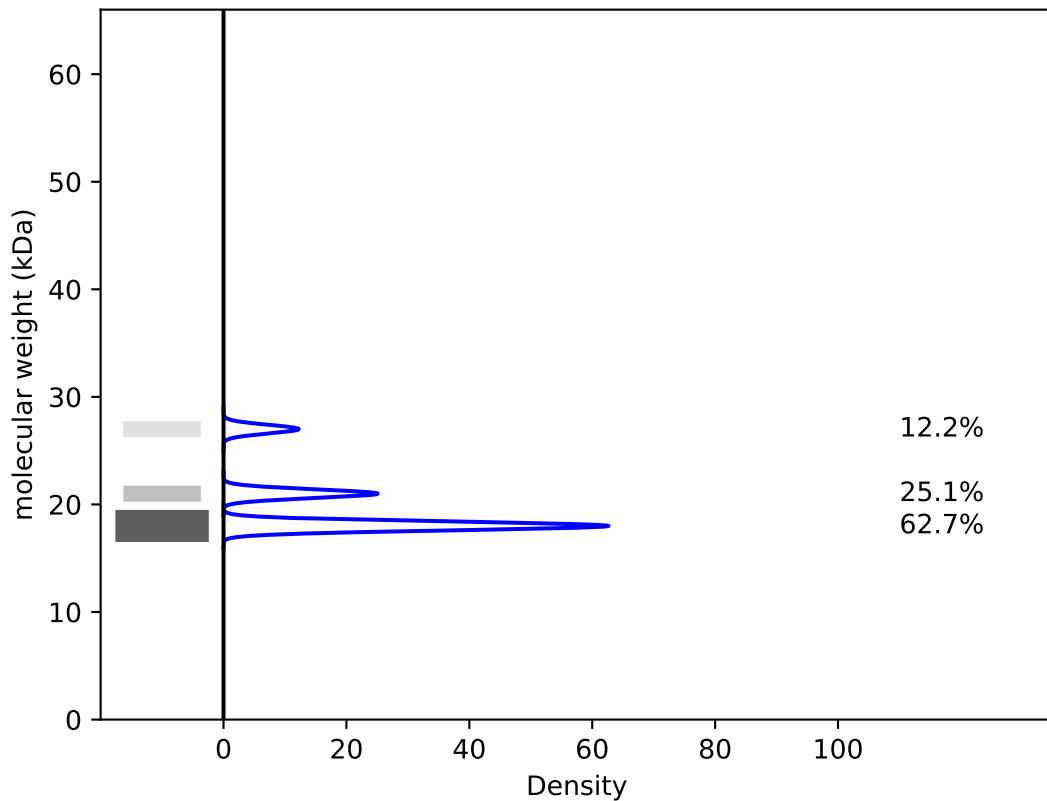

# Q99879



# Q99877



# Q93079



# Q5QNW6



# Q16778

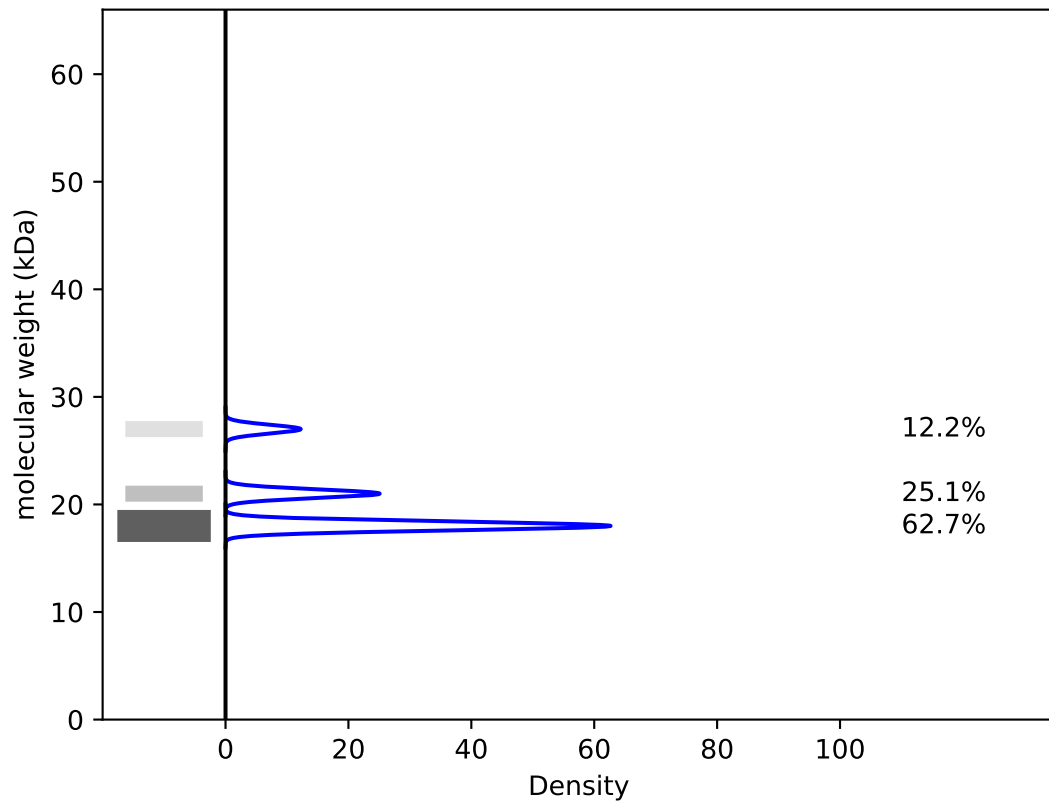



# P62807



# P58876



# P33778



# P23527



# P06899

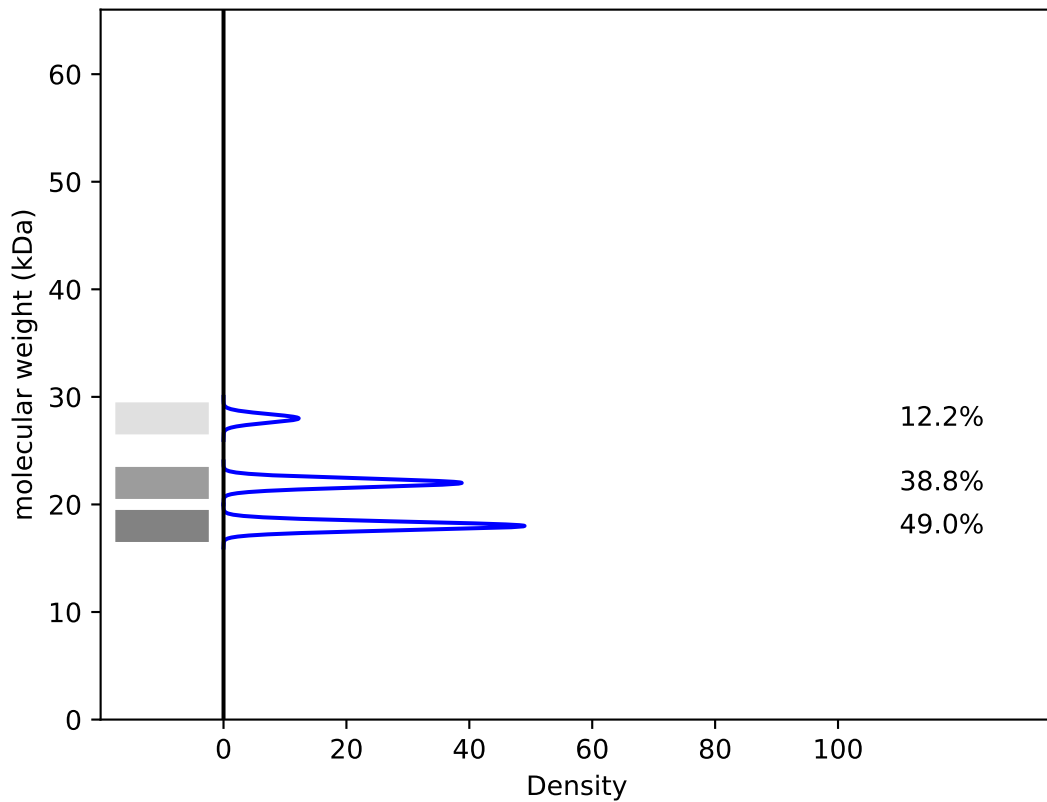

# O60814



# P57053



# Q8N257





# Q96A08



# Q6DRA6

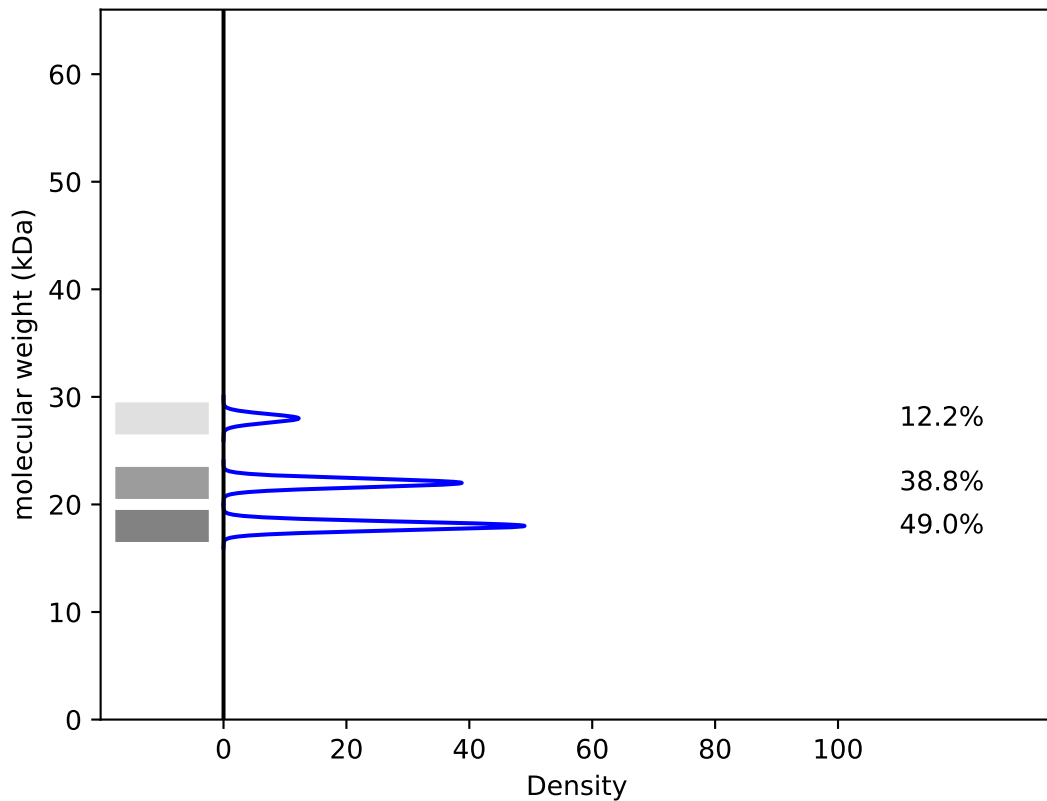

# Q6DN03



O60828



O60831



# O60884



O75131



# Q96FN4





O95741



O75208



O75223

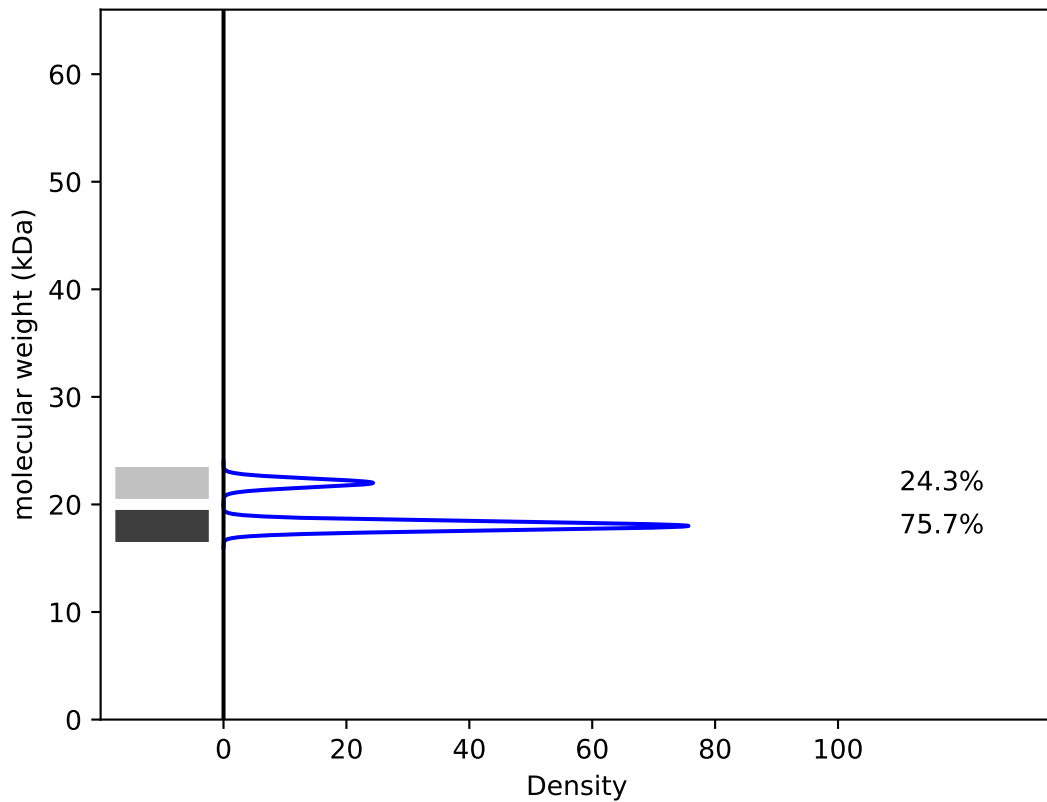

O75251

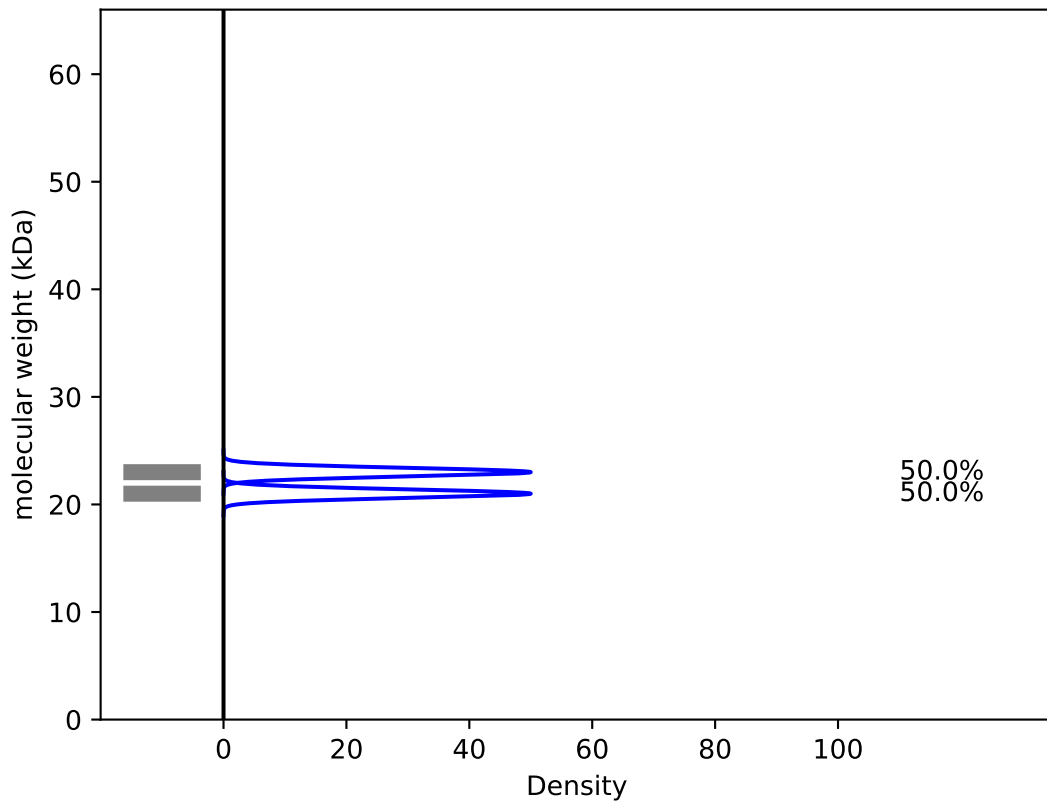

O75340

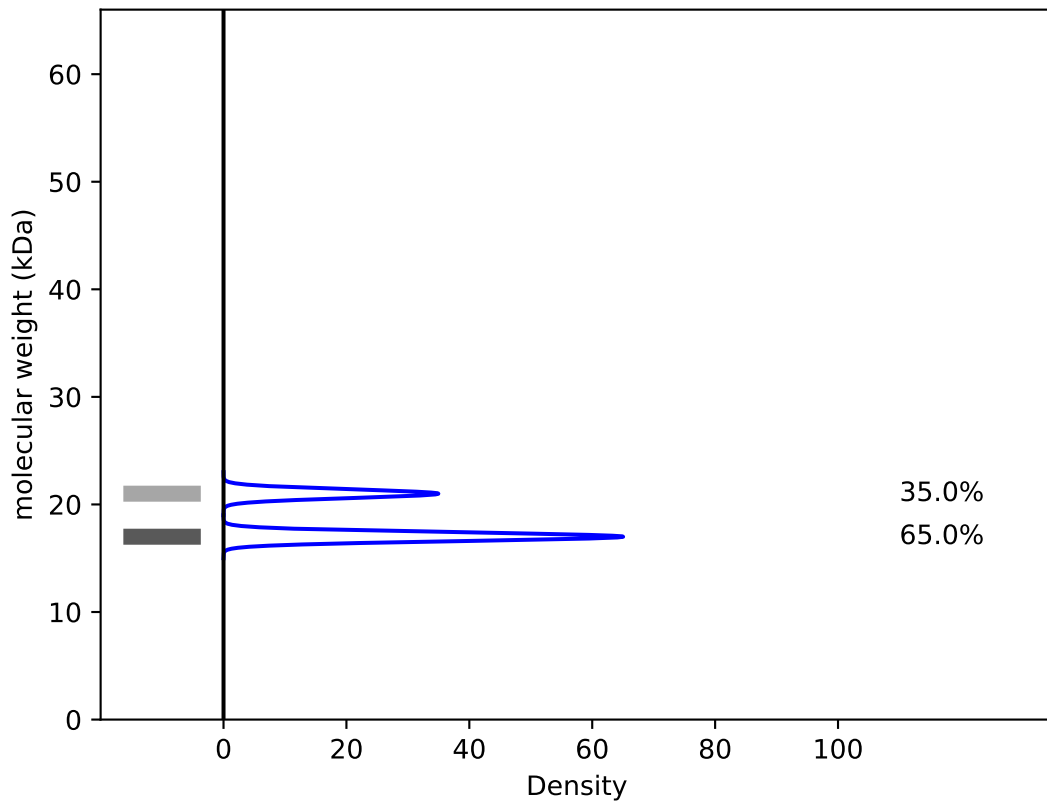

O75367



# Q9P0M6



O75396





O75436



O75489



O75494

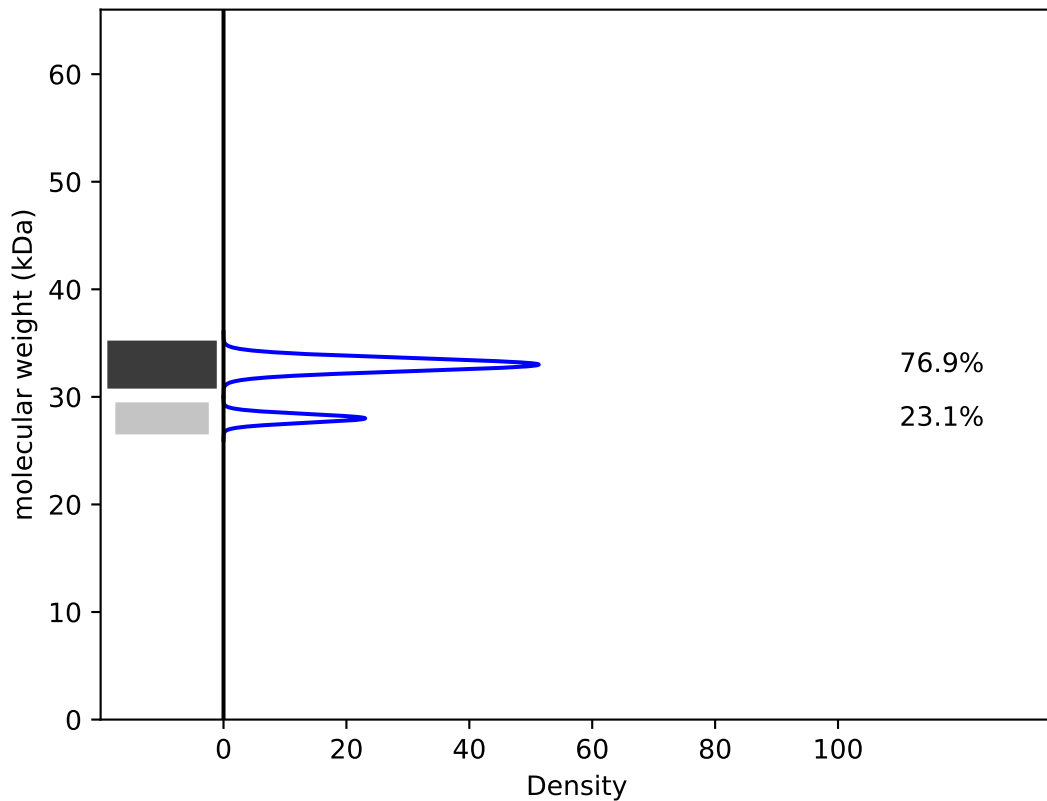

# O75607

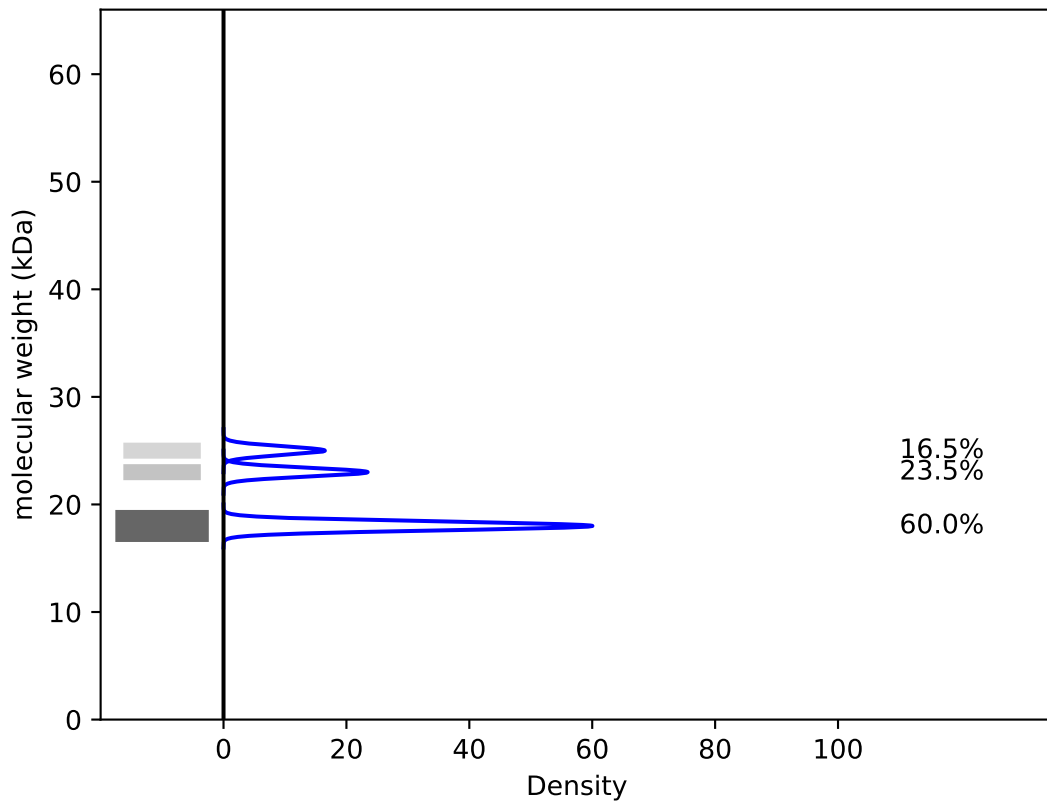

O75608



O75718



O75792



# O75794

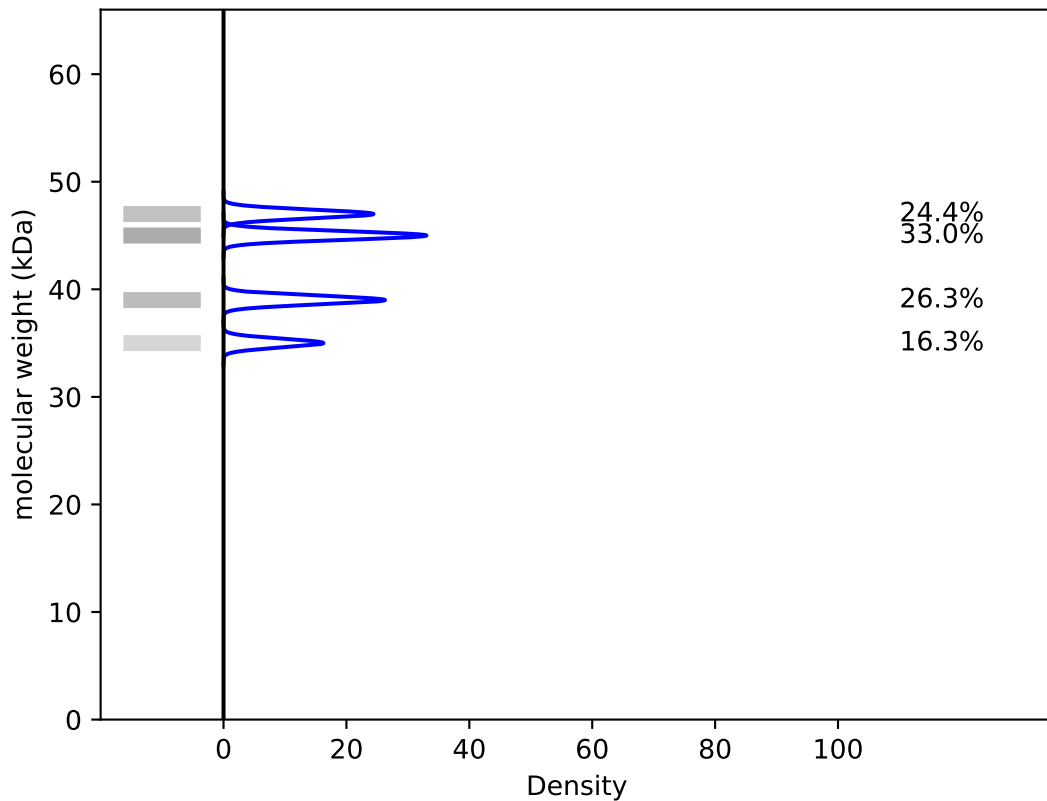



O75818



O75822

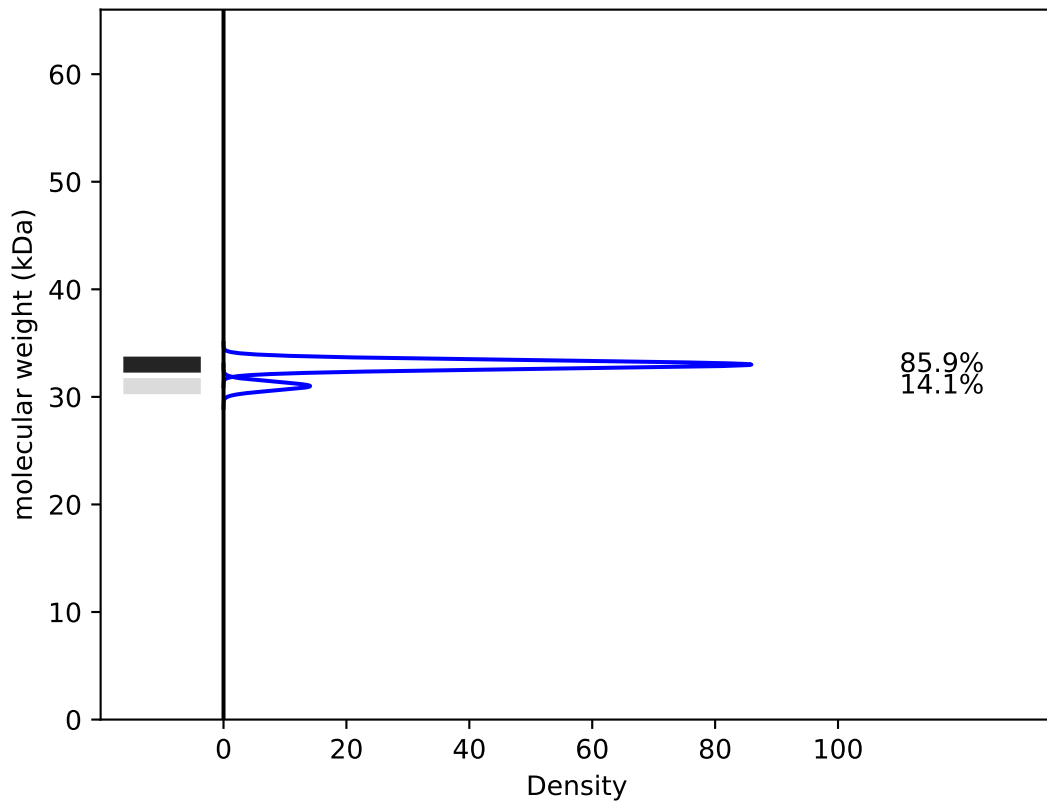

O75828

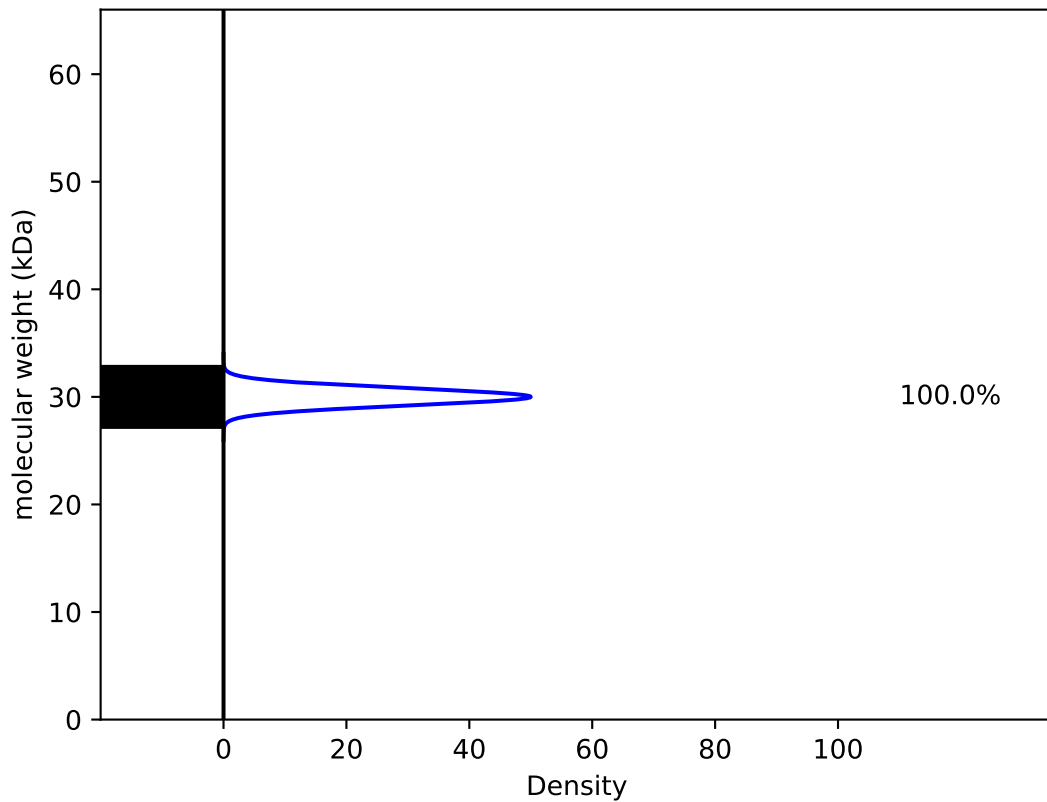

O75832



O75880



O75934

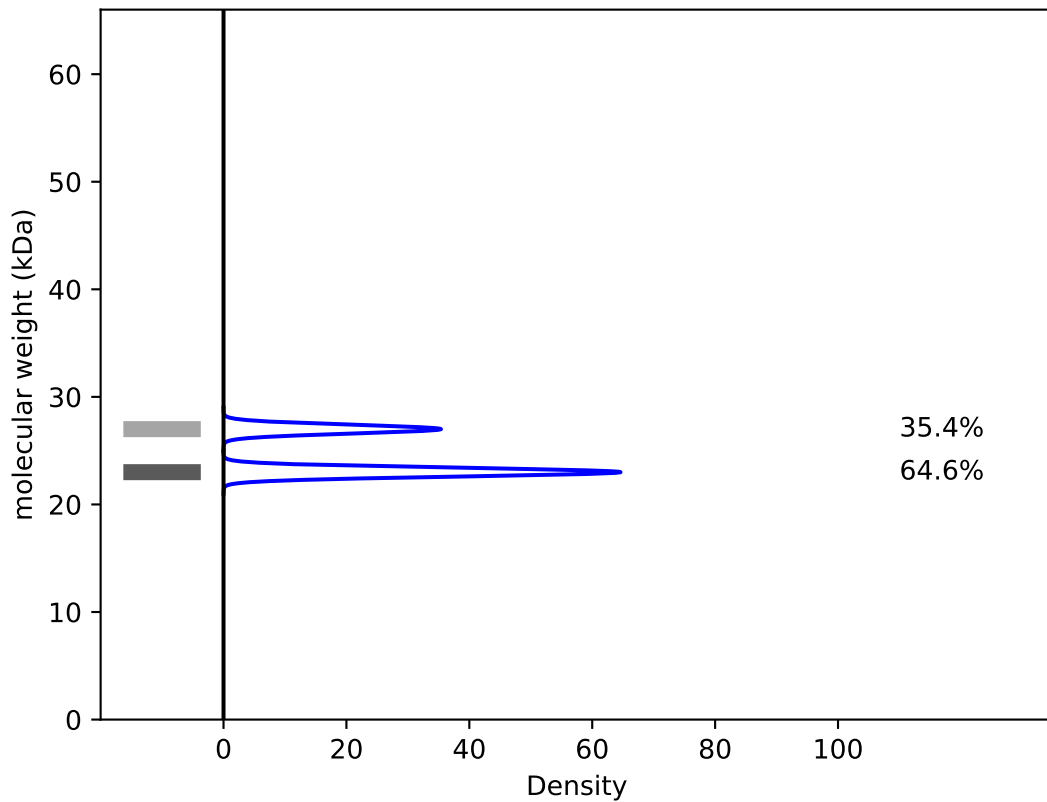

O75935

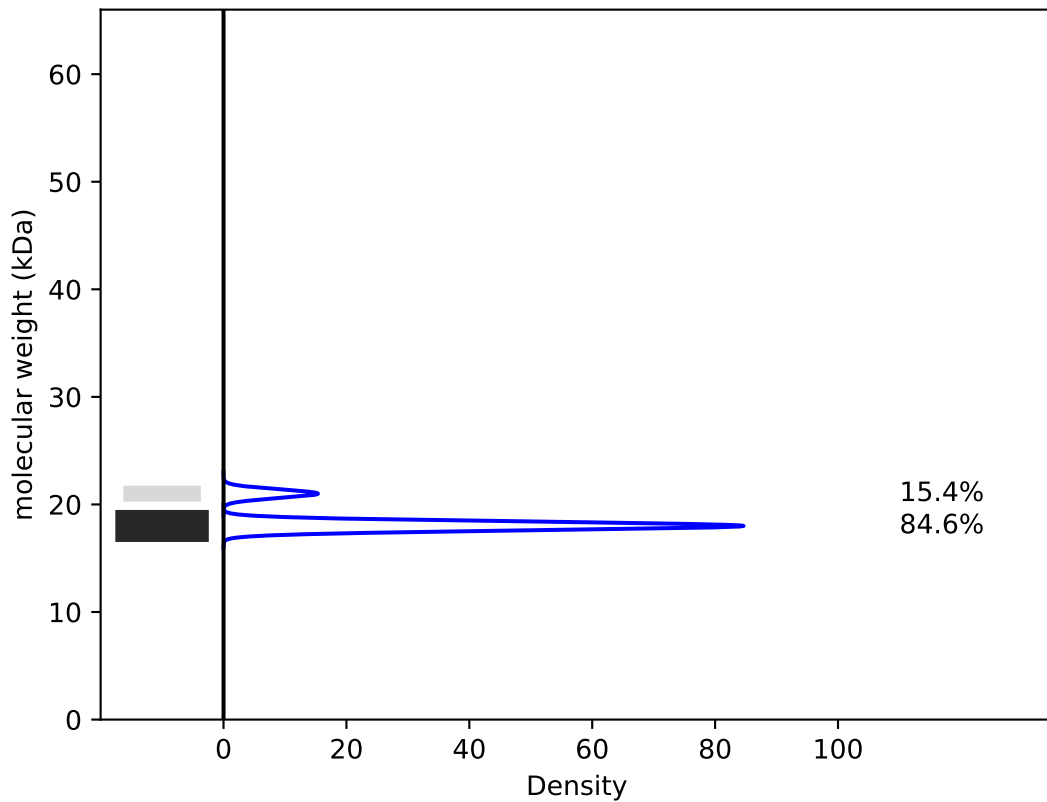

O75937





O75947

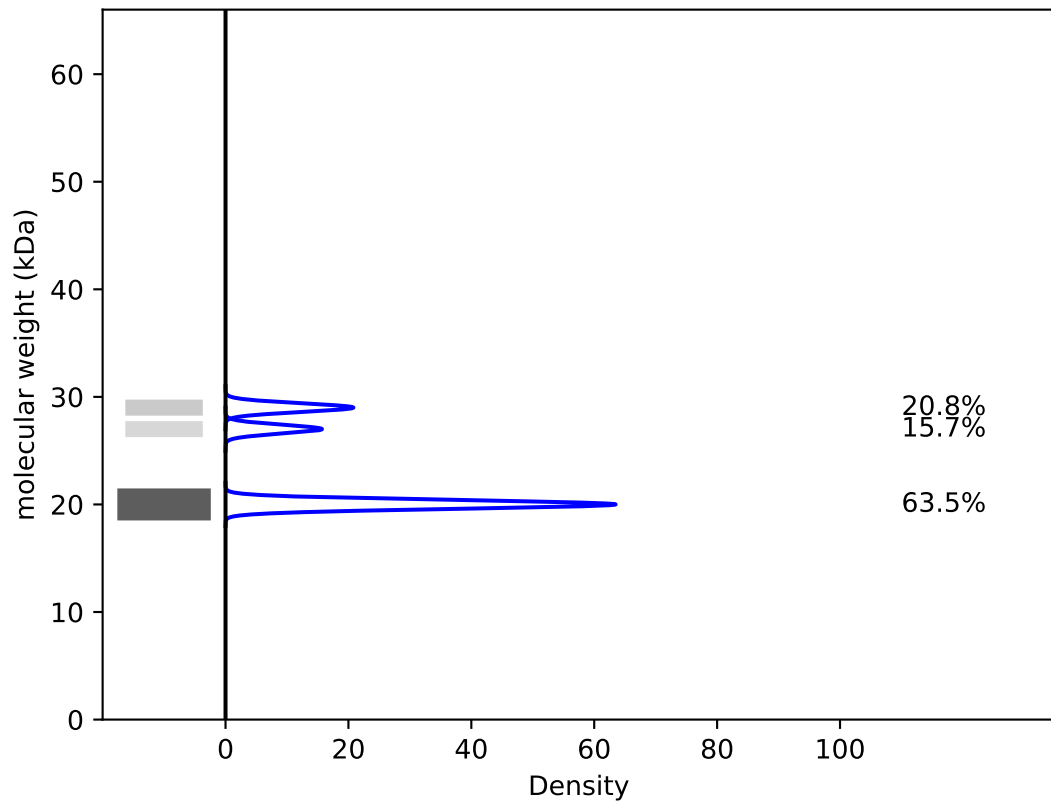

O75955



O76003



O76021



O94903



O94905



O95292



O95299

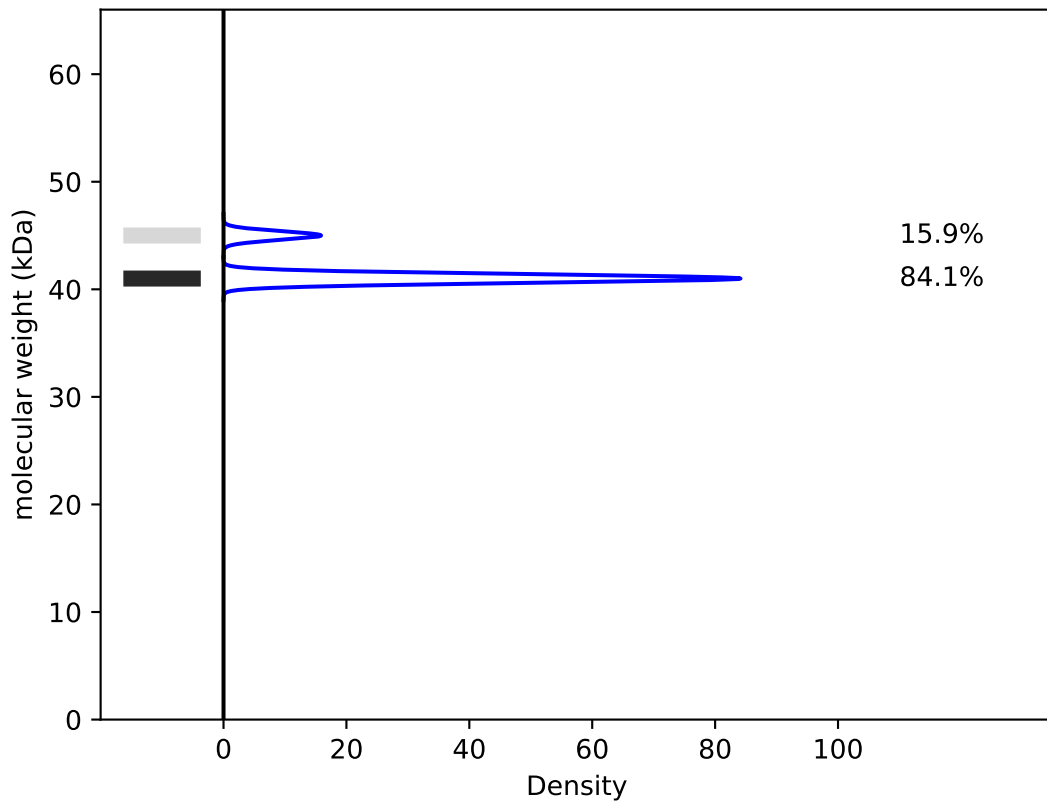



O95336

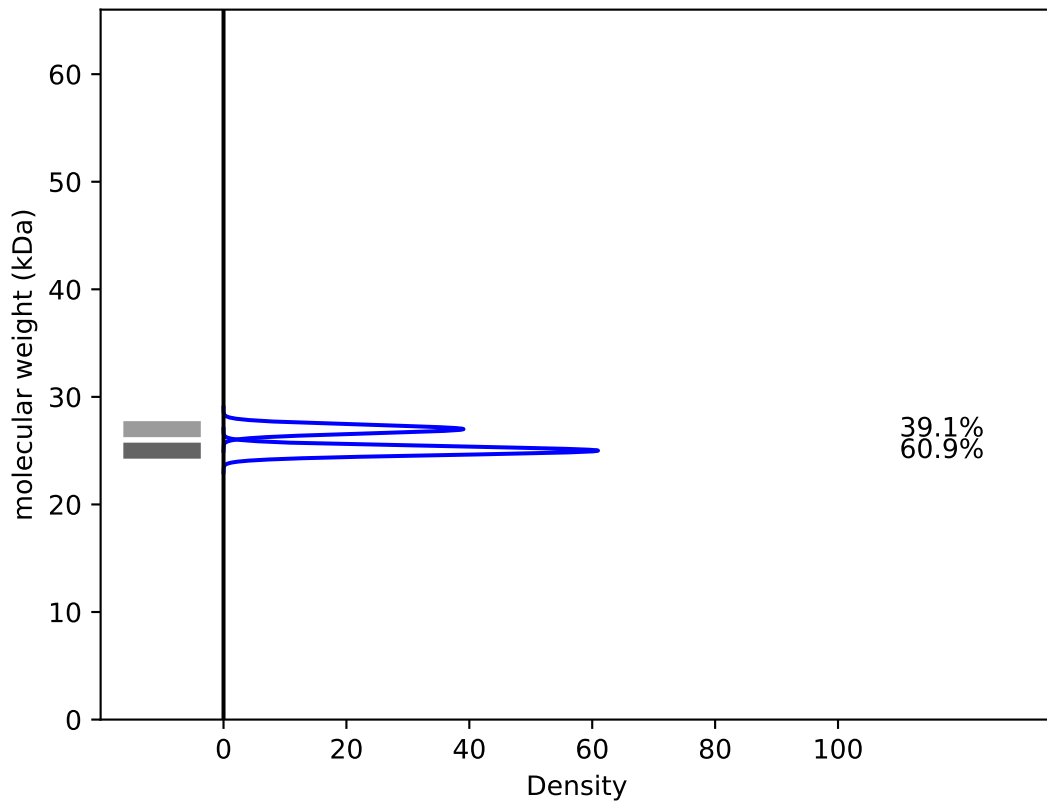

O95372



O95433

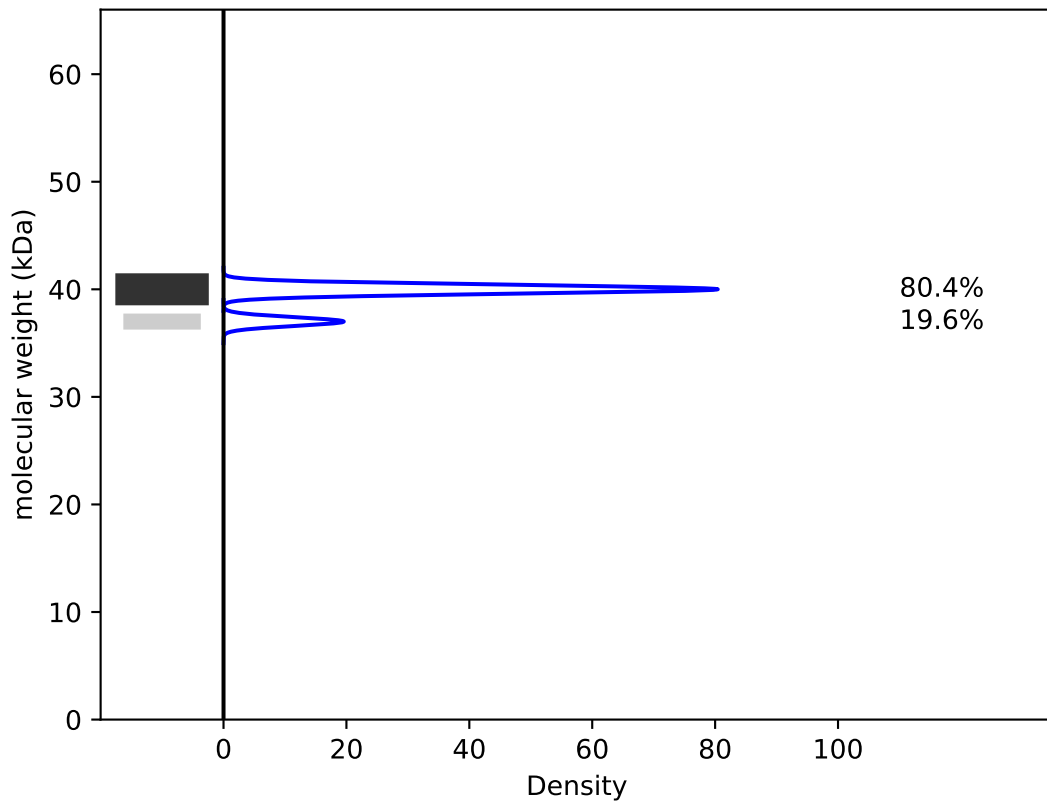

# O95456

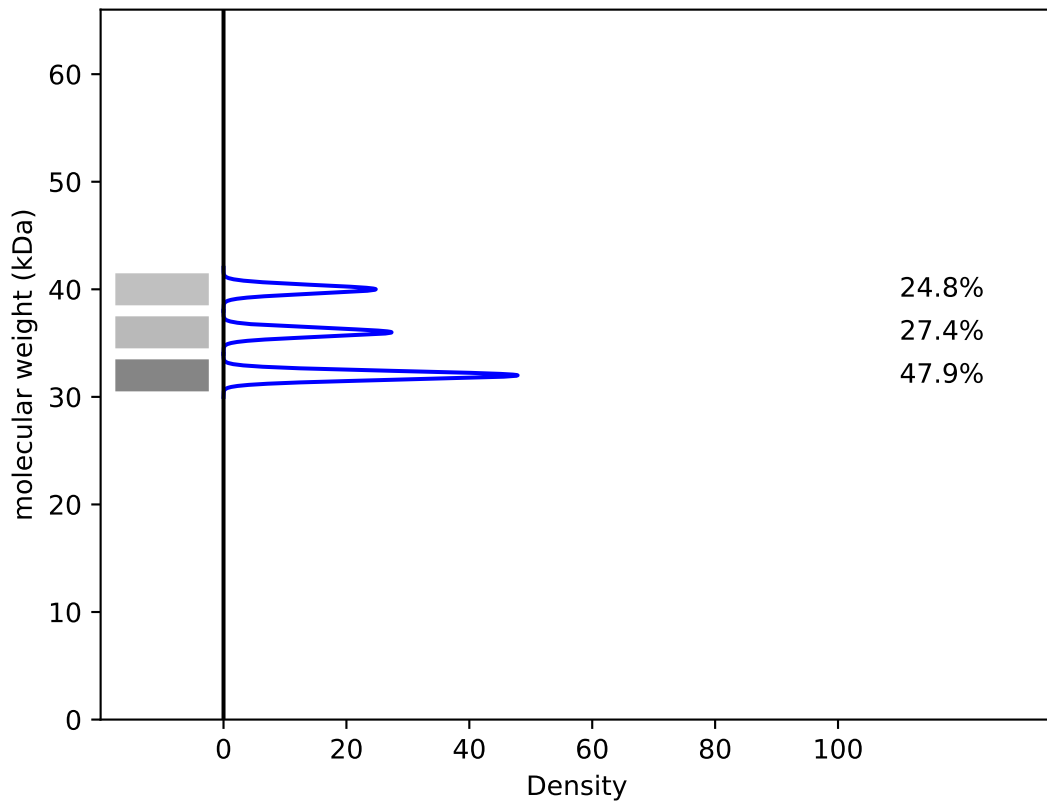

O95571

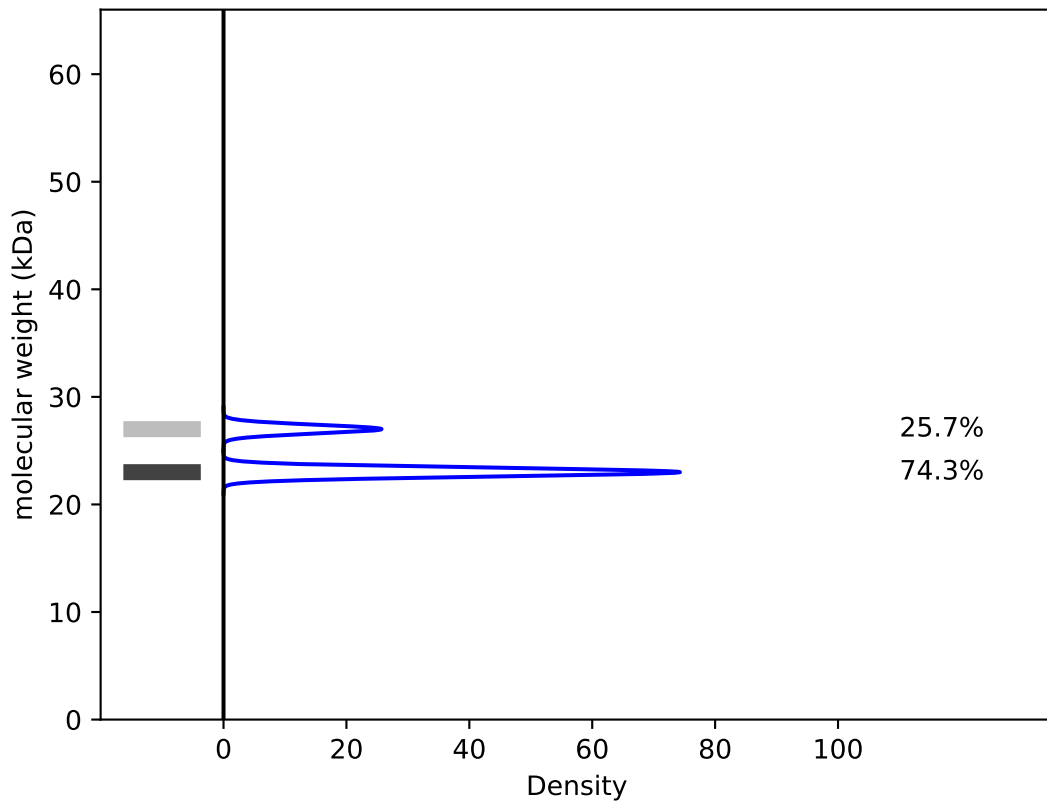

O95747



O95749



O95816





O95861



O95900



O96000



O96007



O96008

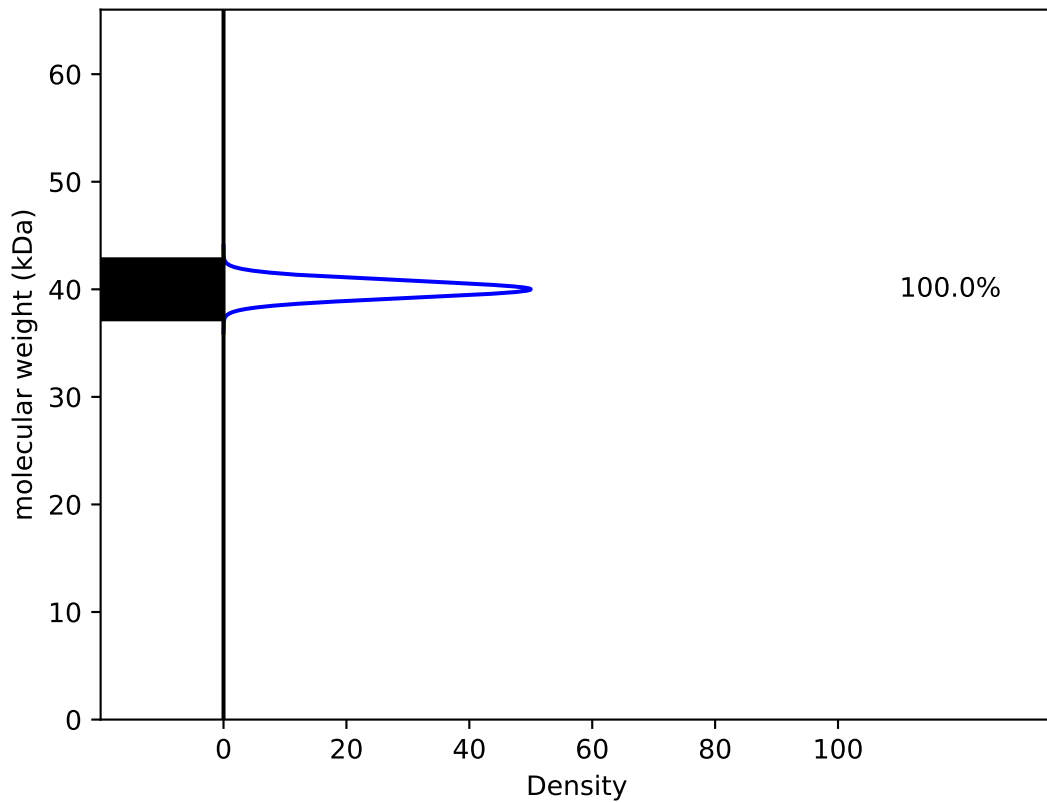

O96019



O94805



P00338





# Q6ZMR3



P07864



P00374



# Q86XF0



P00387



P00403



P00492

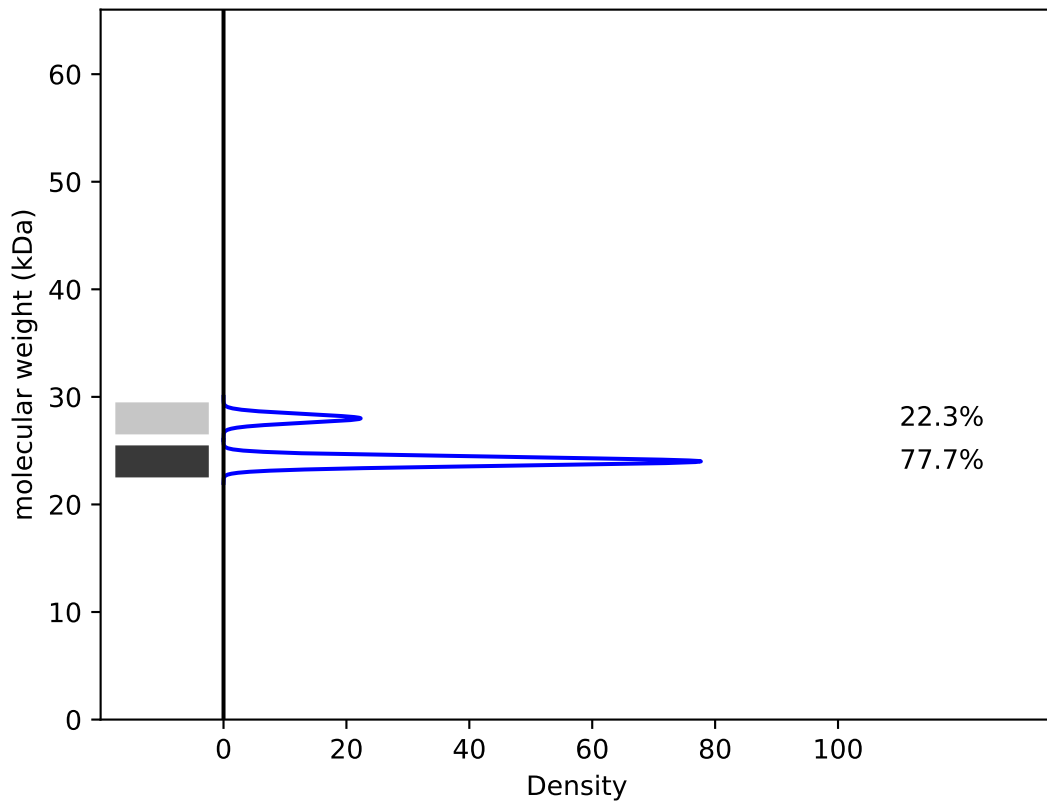

# Q9NRG1





P00558



P00568

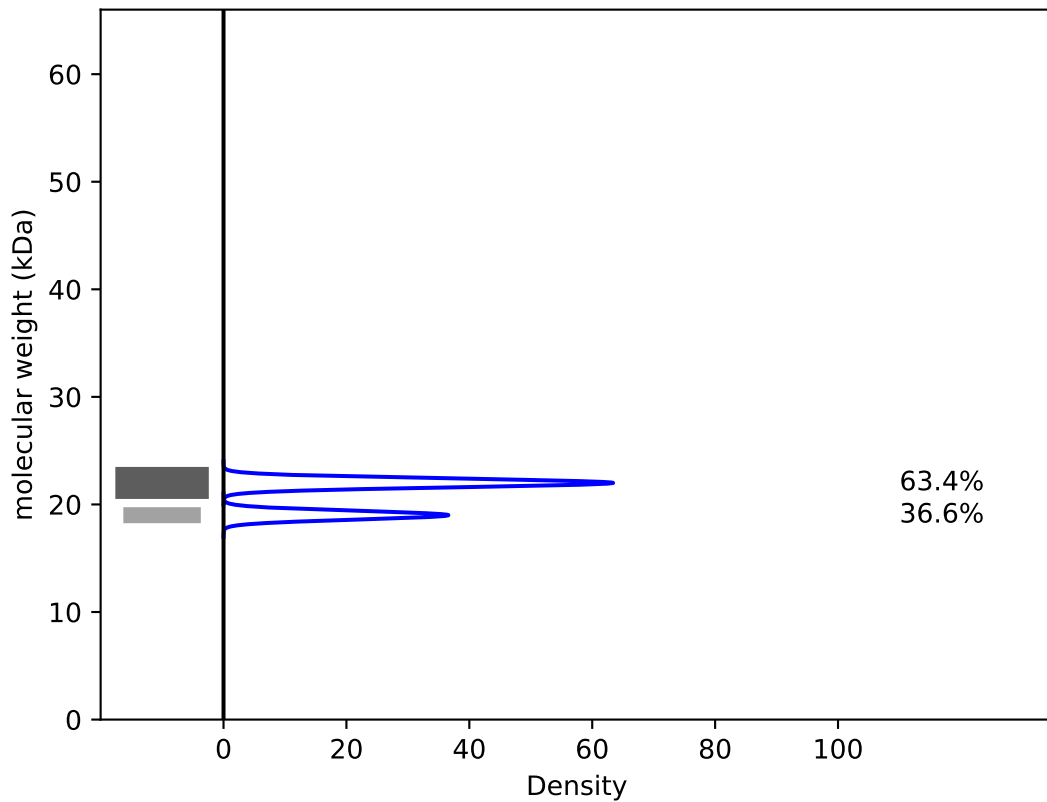

P00966



# P01111

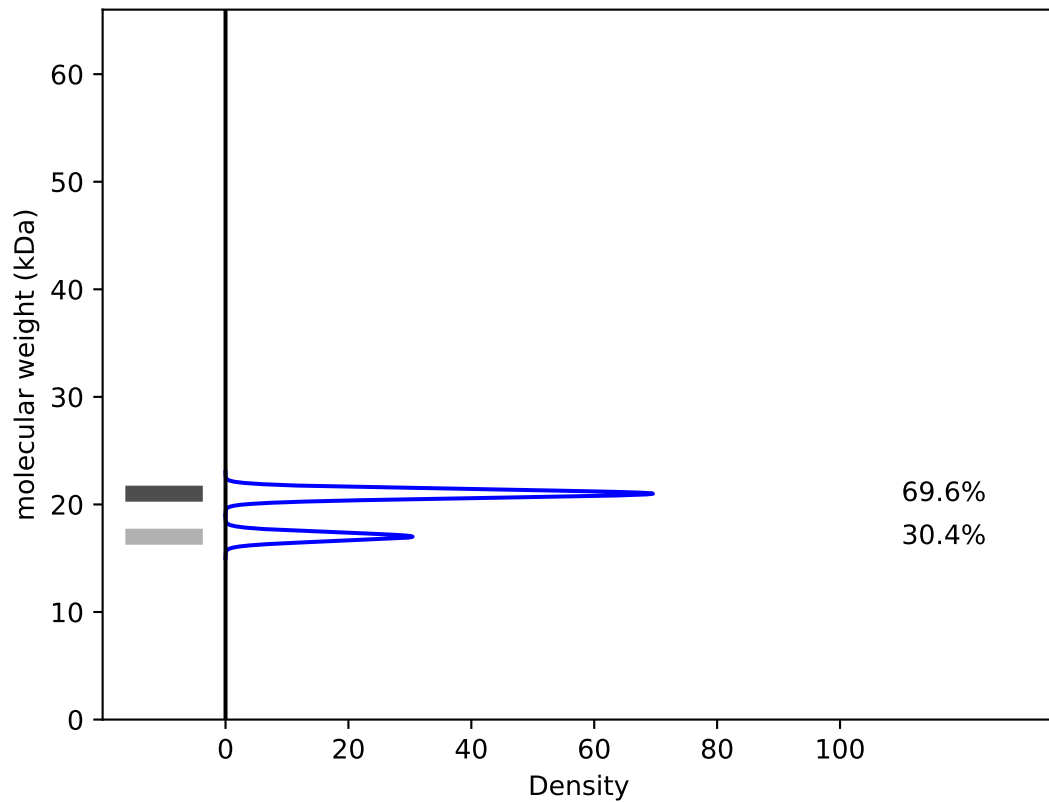

# P01116



# P01112



# P01891

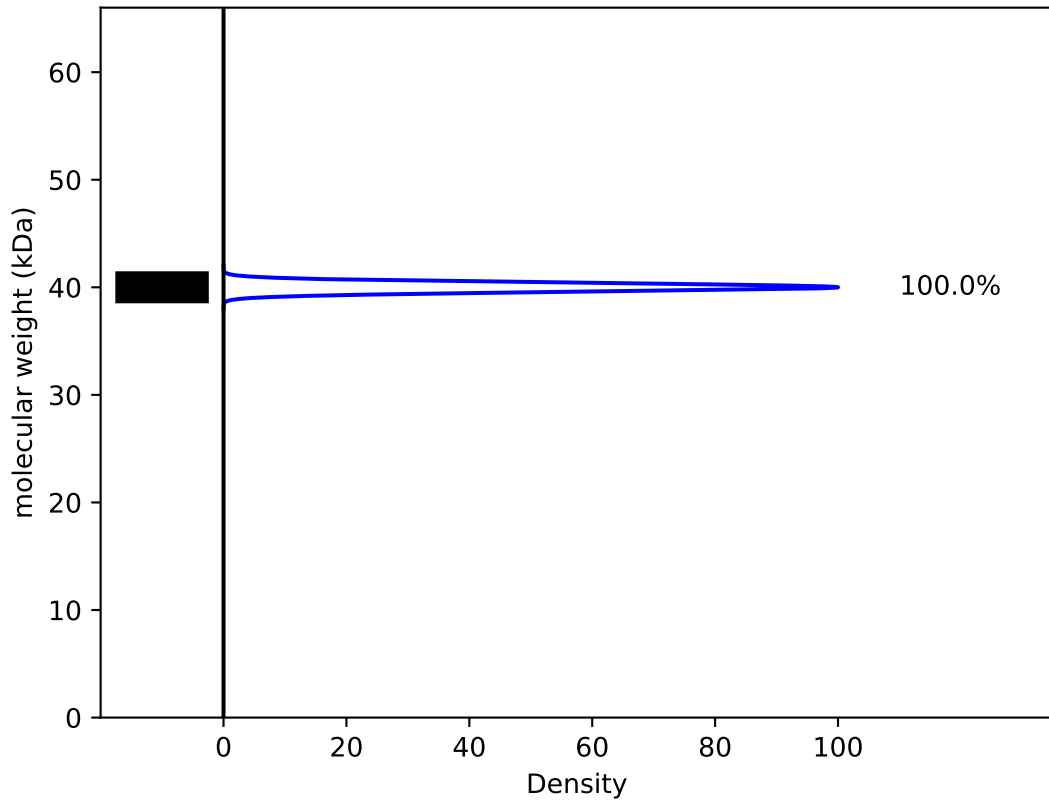

# P30459





# P16189



# P16190



# P30512



# P10314



# P30511

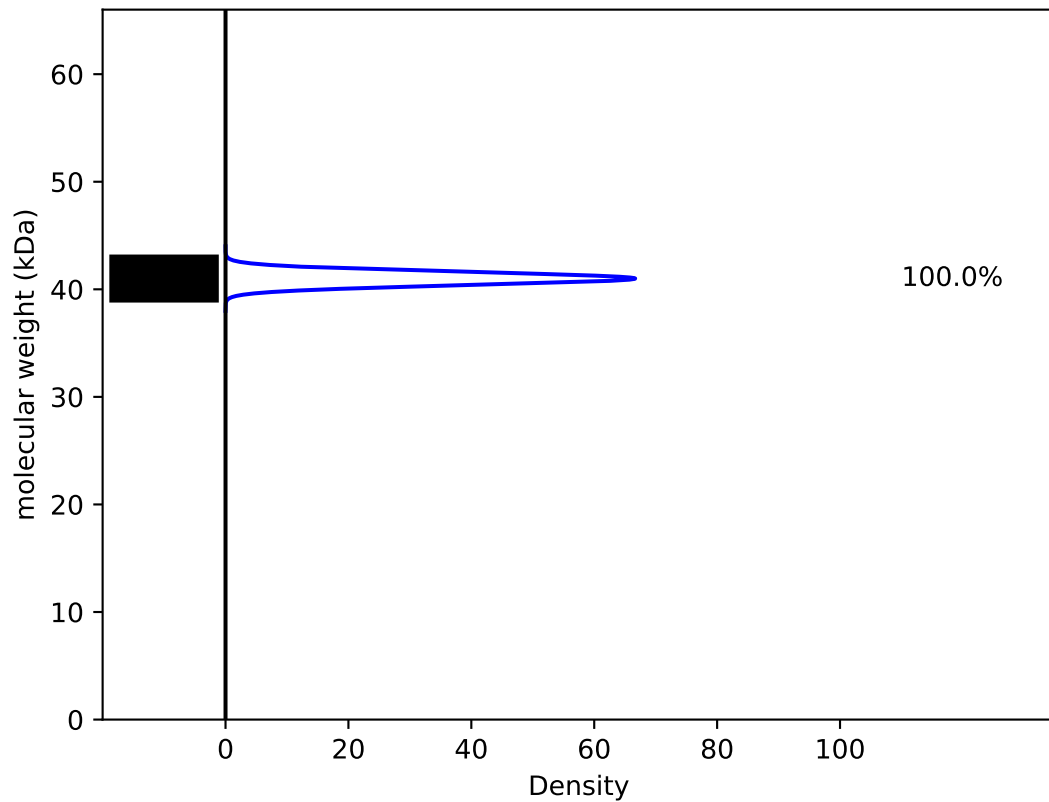

# Q5VX52



P02792



P02794





# P04040

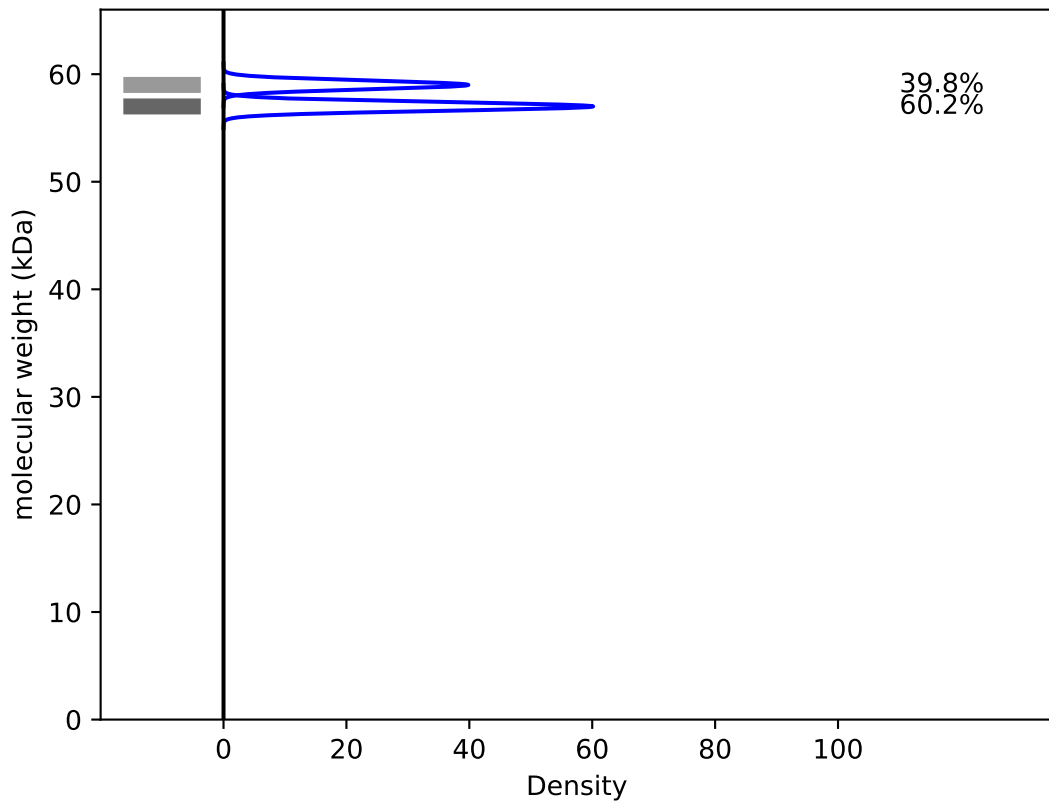

P04062



P04075

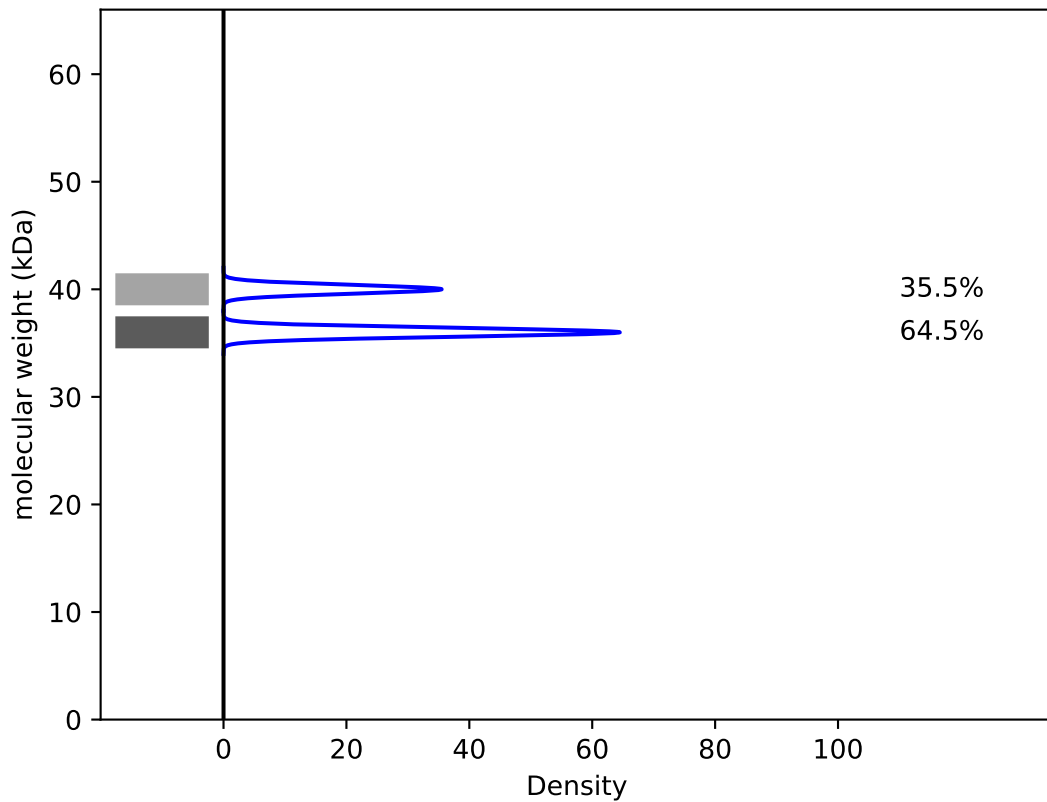

P05062

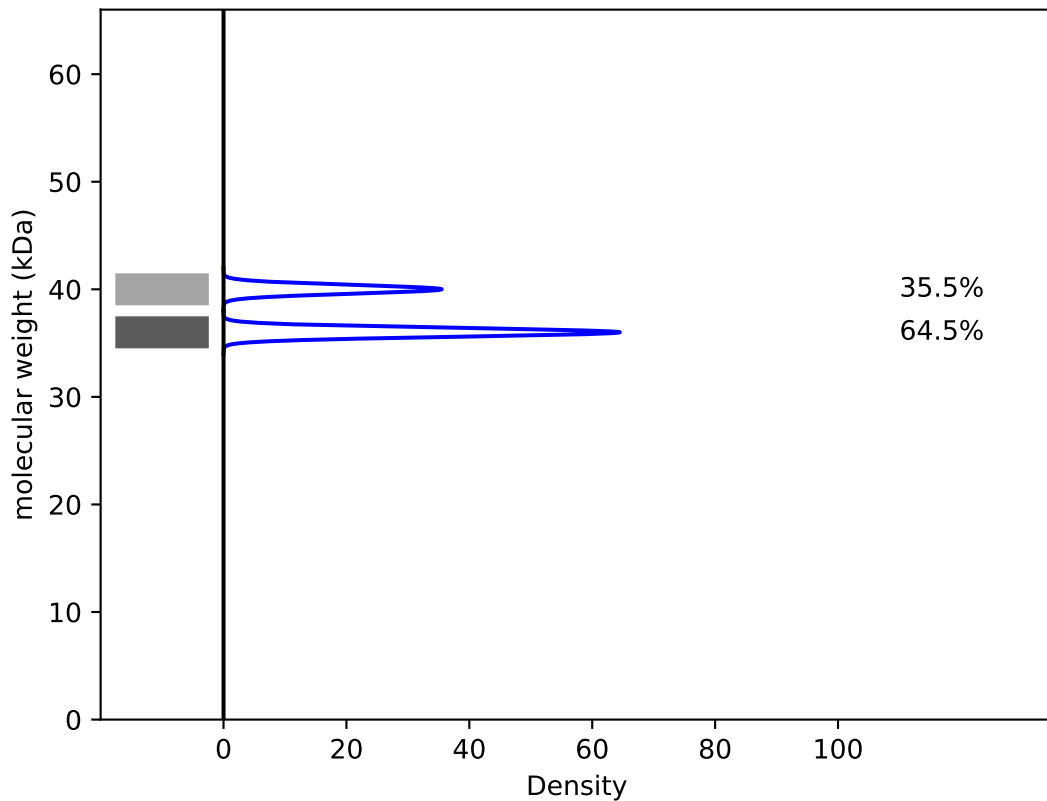

P04083

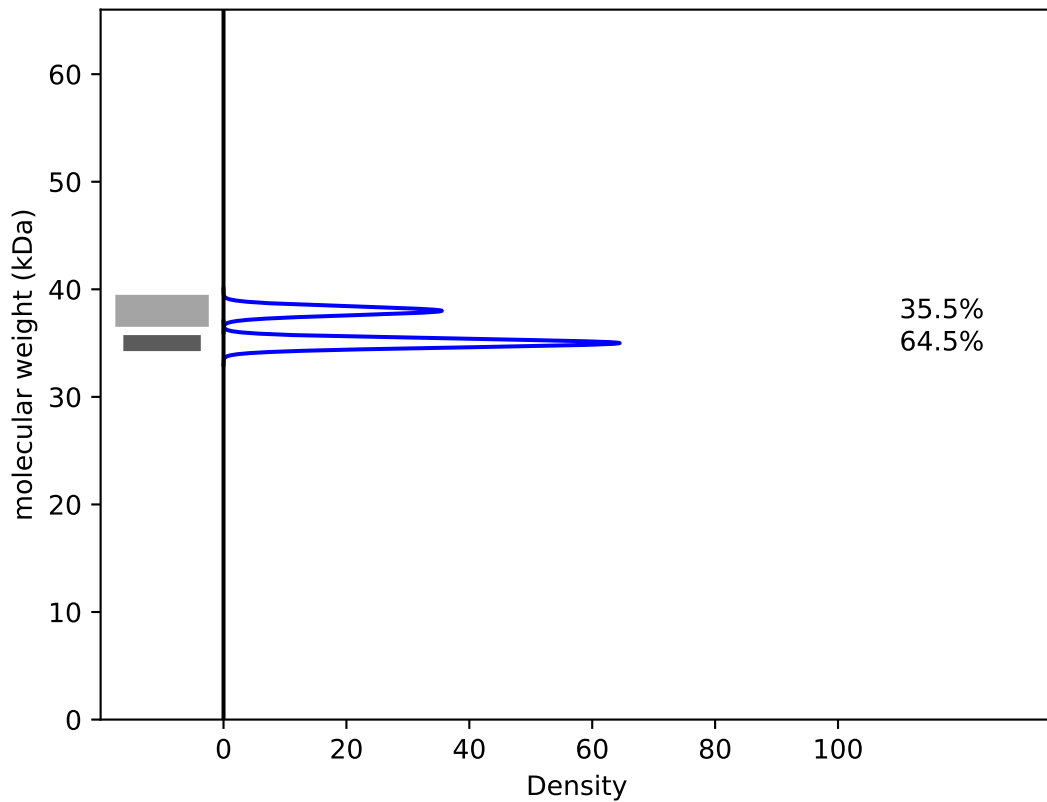

P04179



# P04181

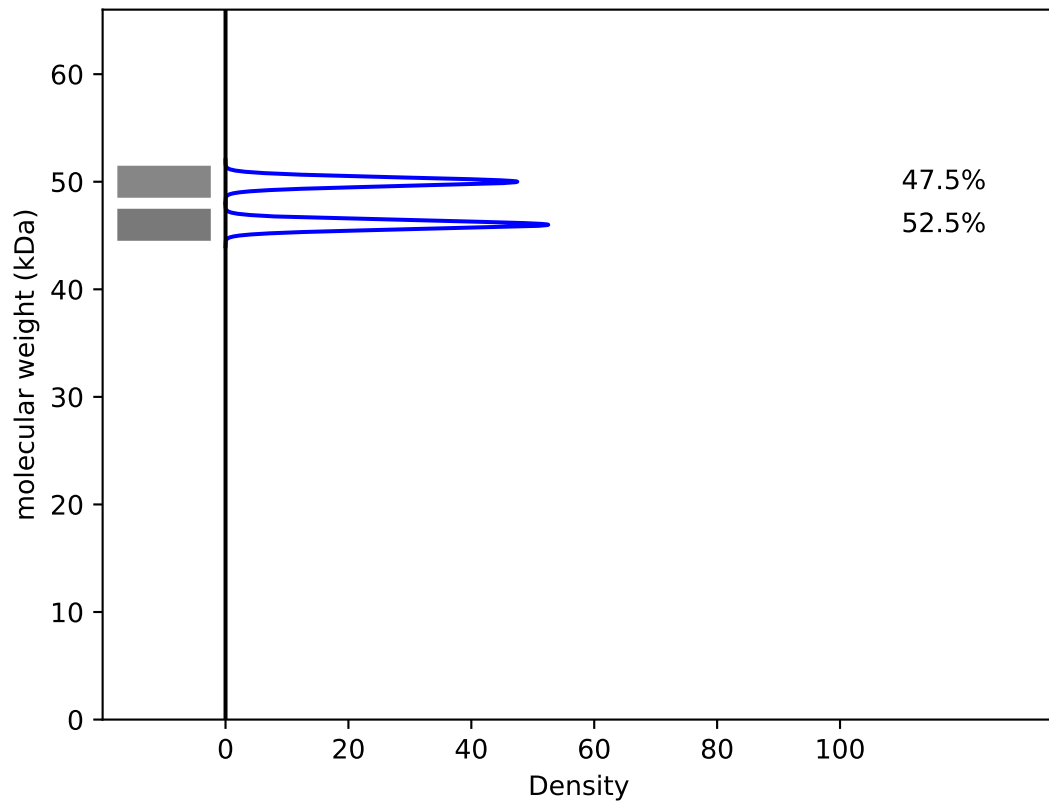

# P04350

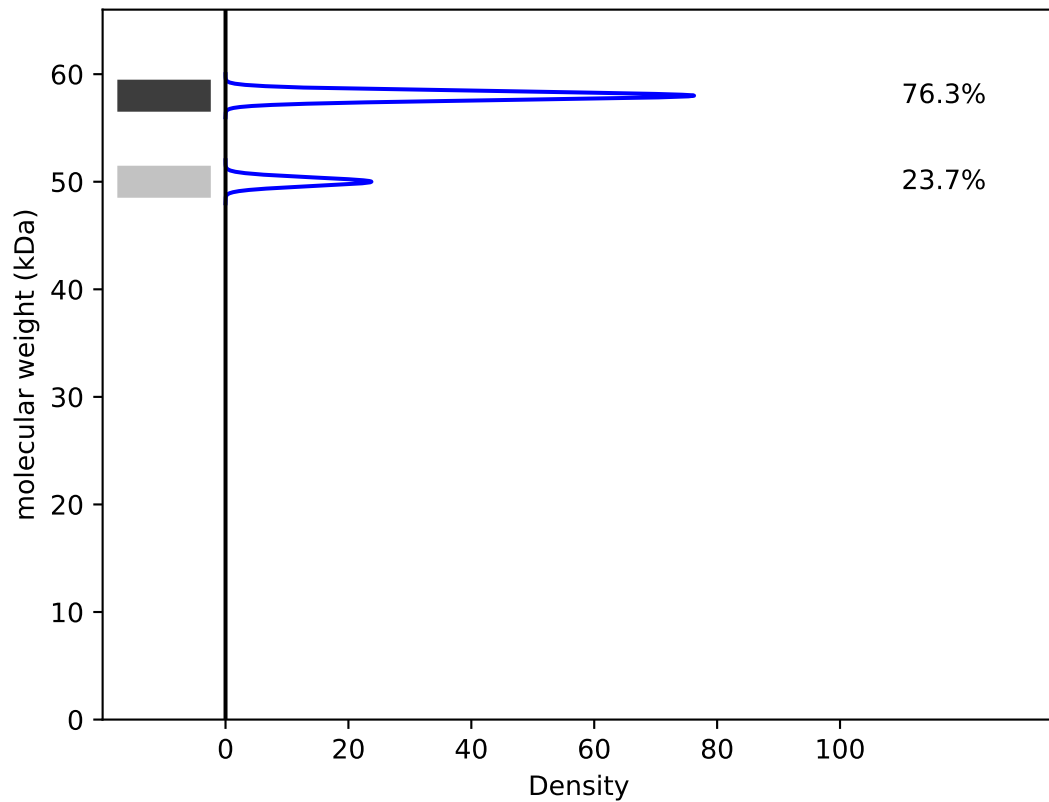



P04406

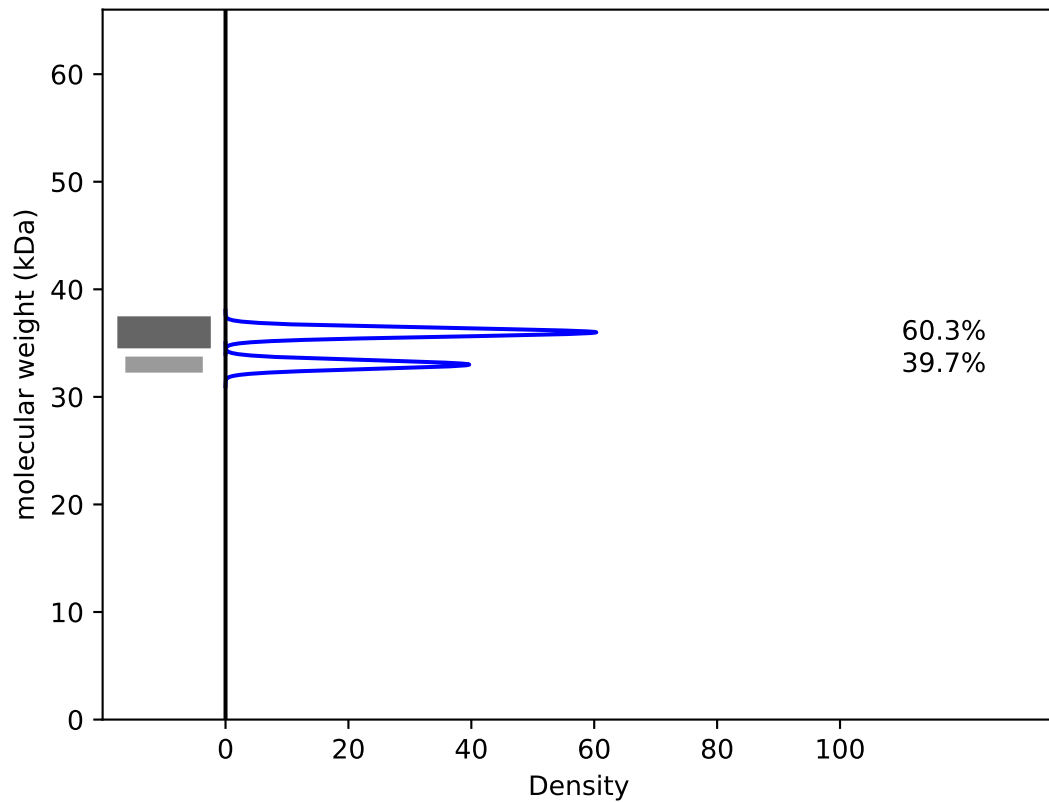

P04632

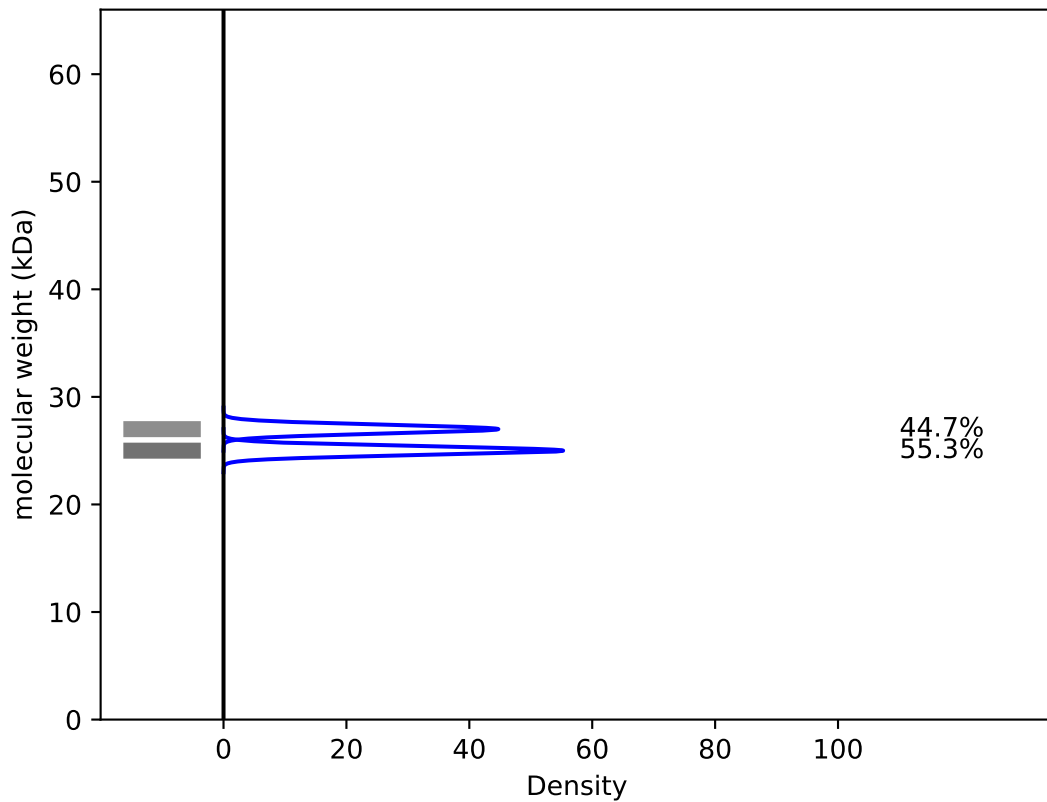

# Q96L46

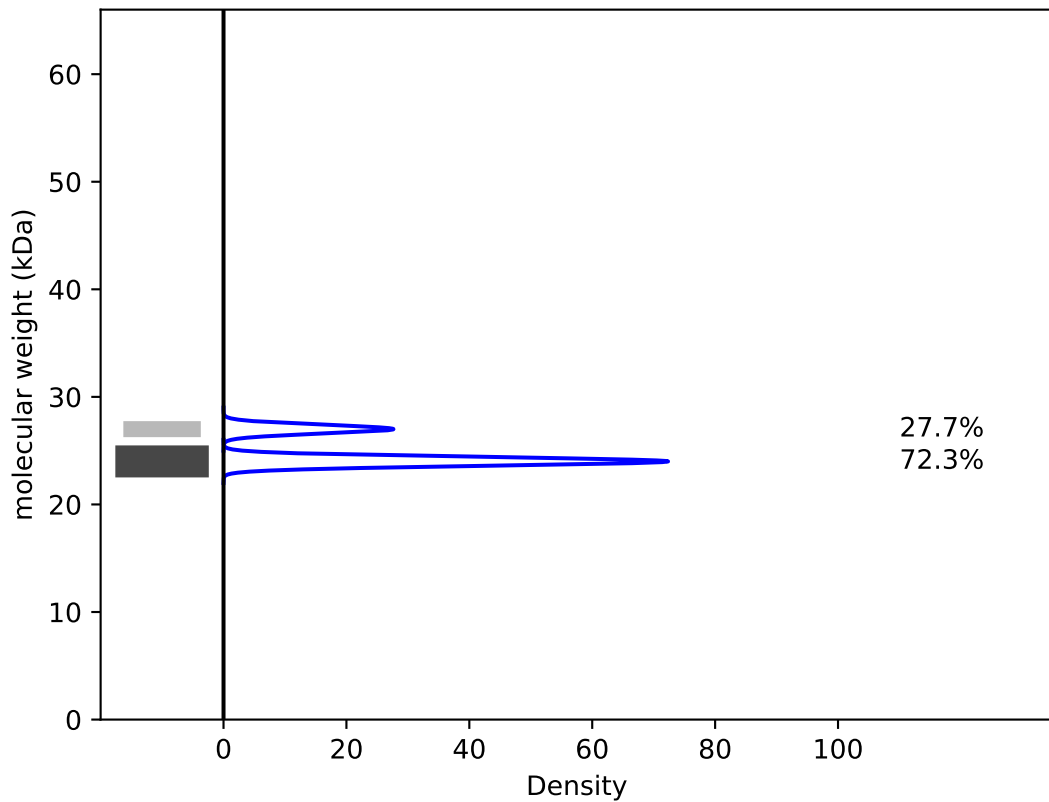

P04792



# P04818

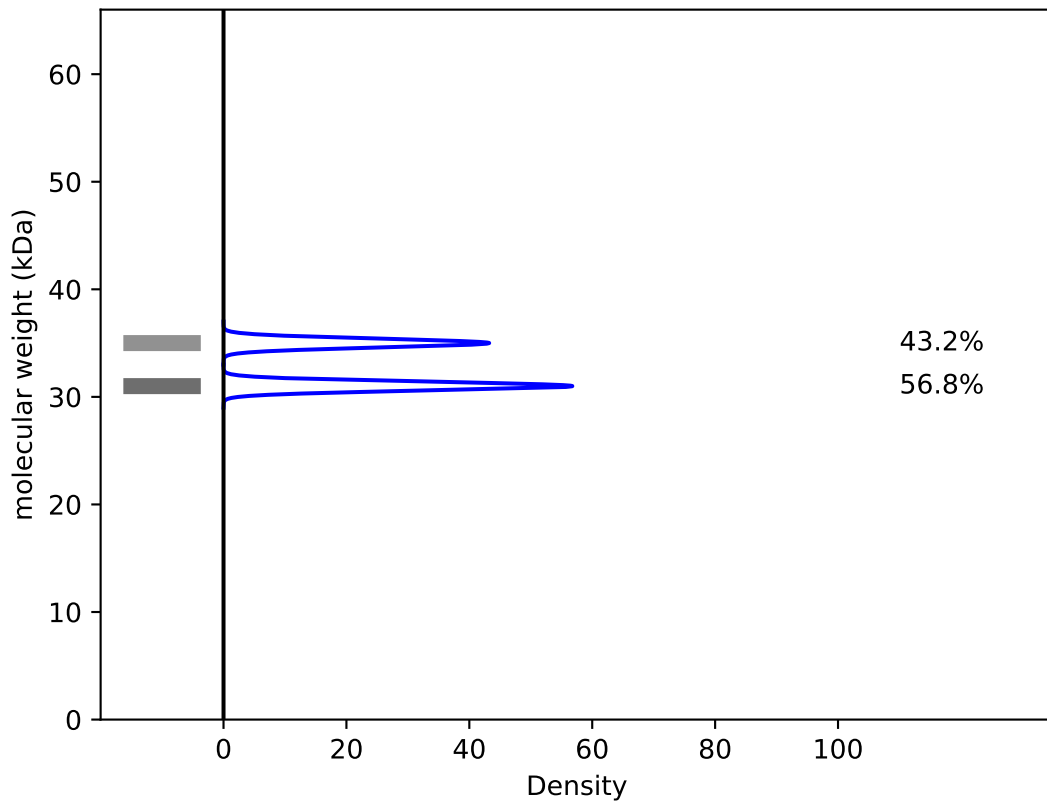

# P04899

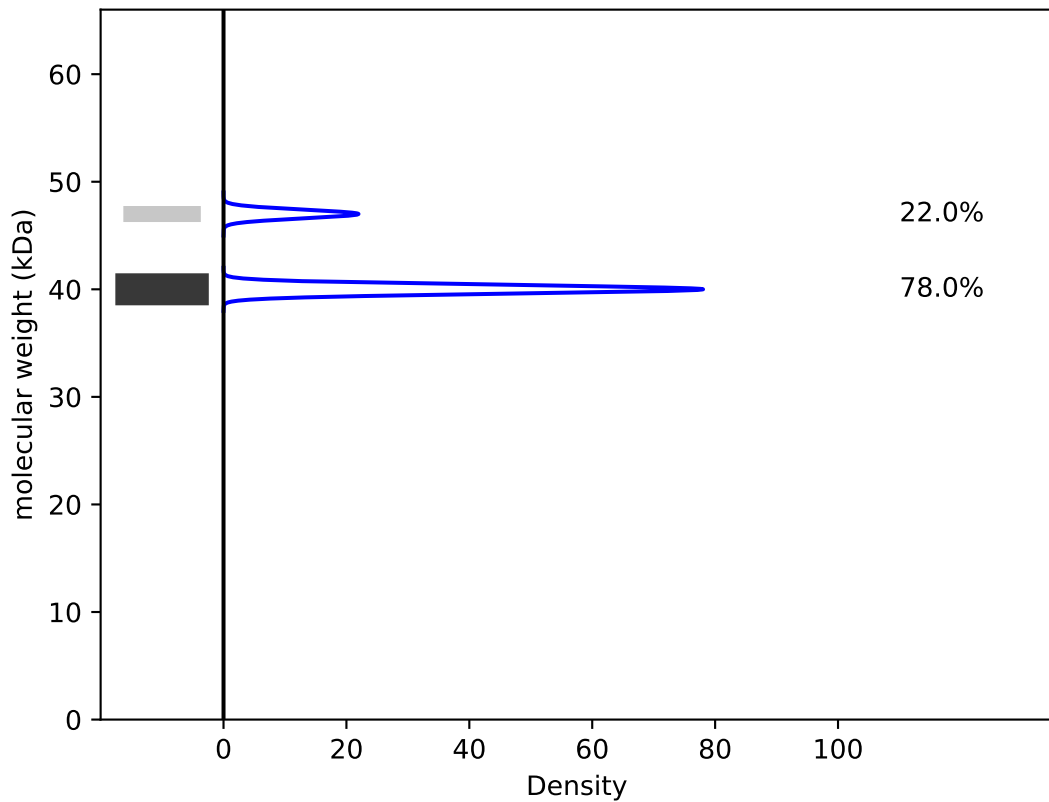

# P11488

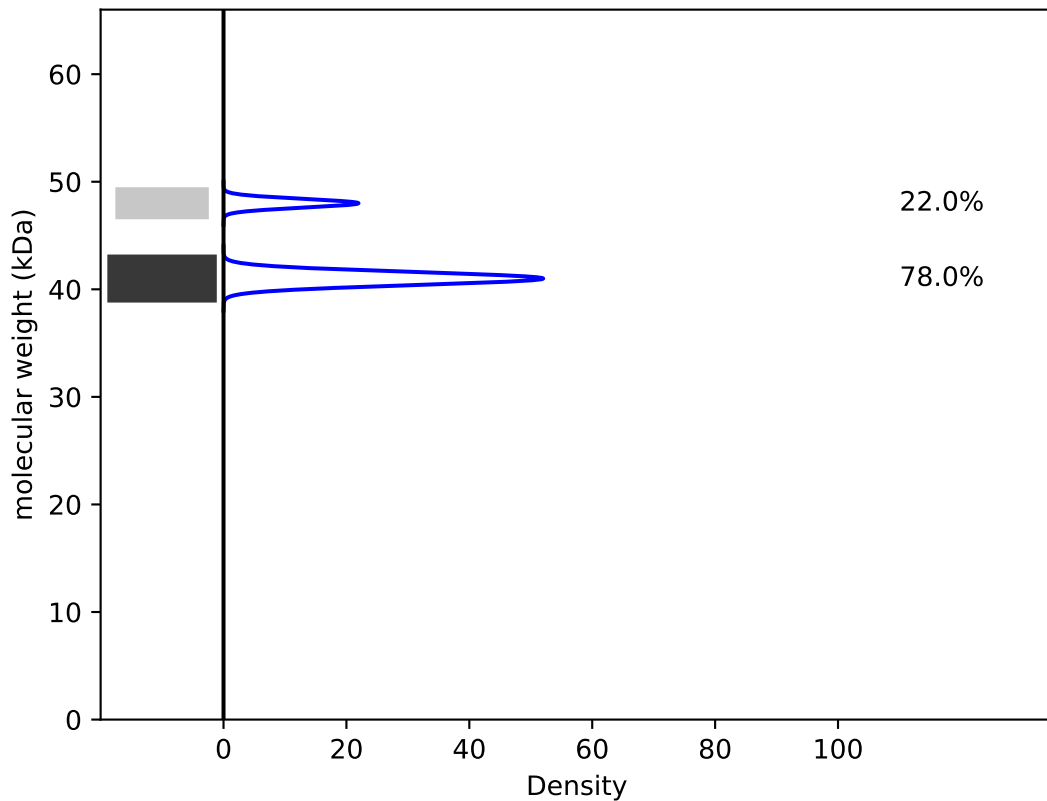

P09471





# P19087



# A8MTJ3

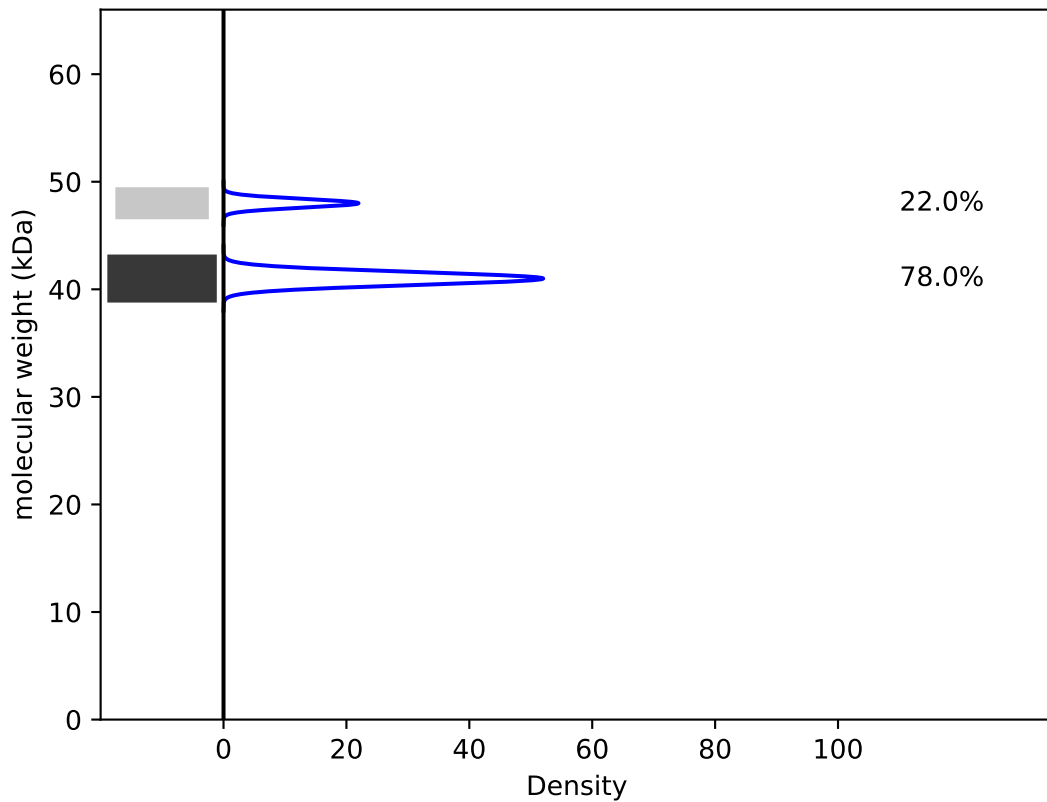

# P38405

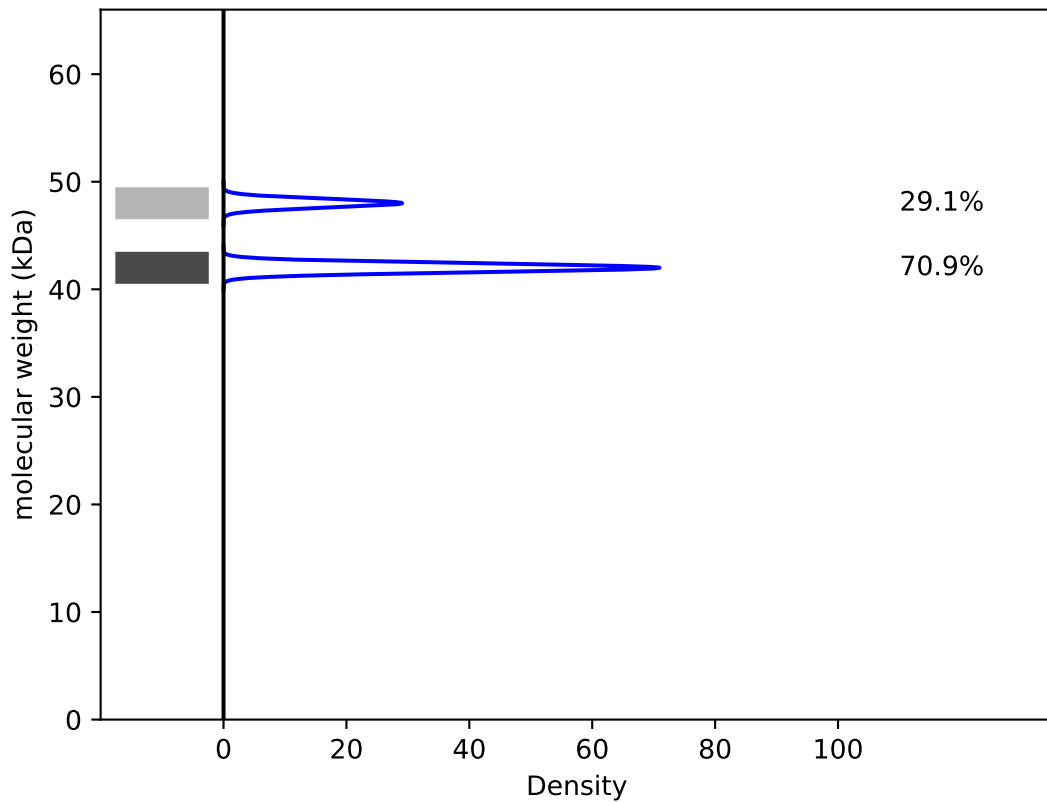

# P05026

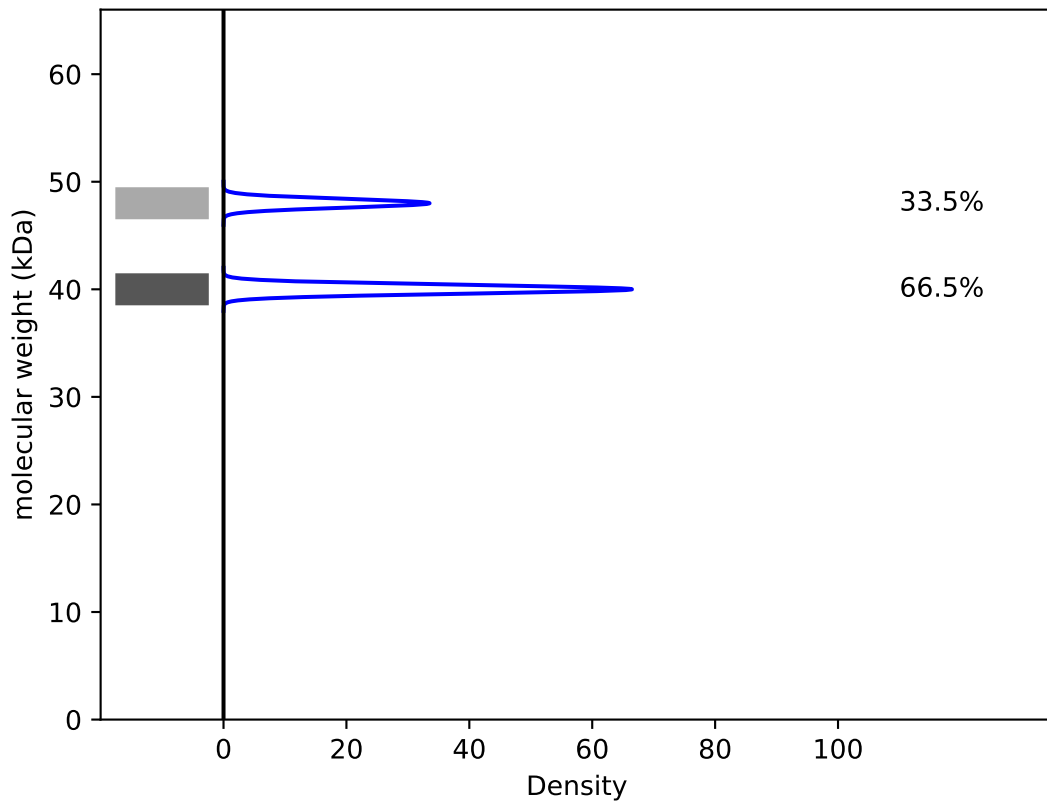

# P05141

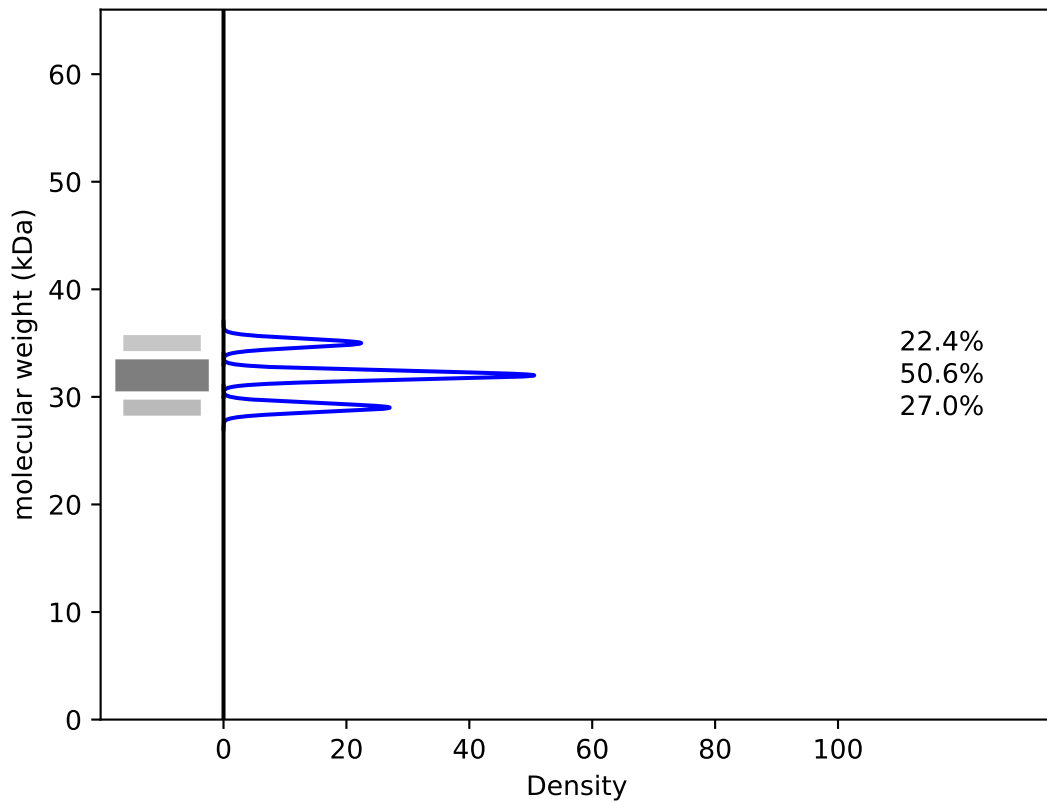

# P05198

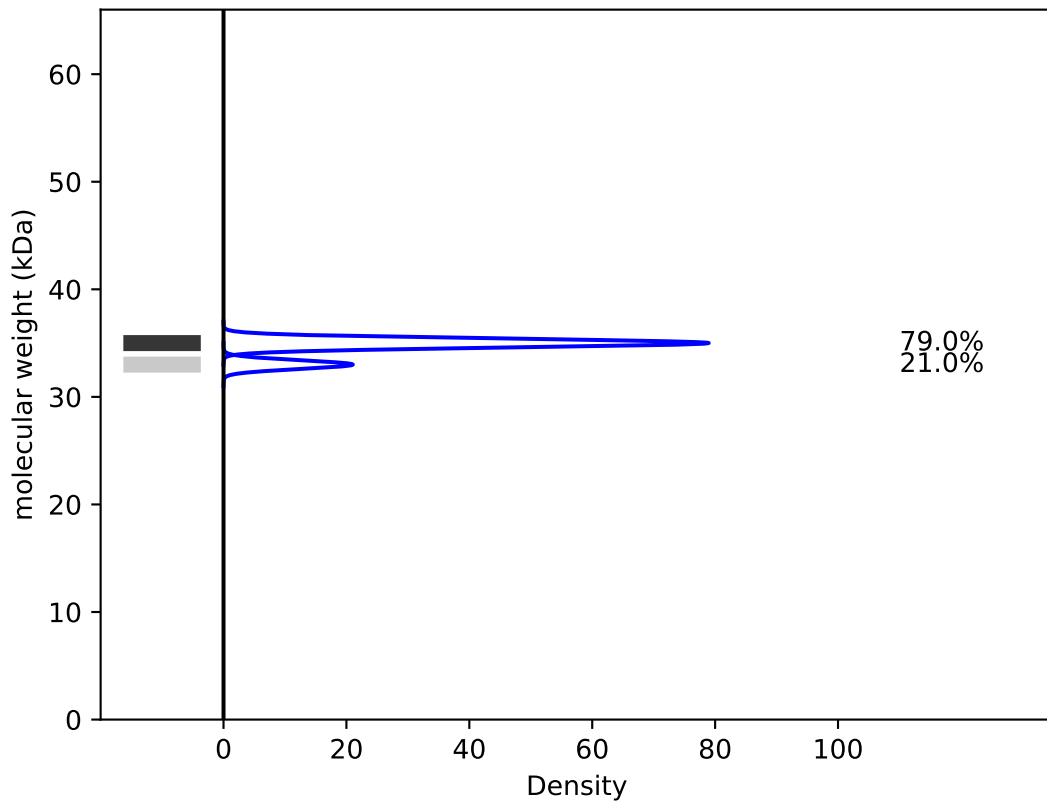

P05388



# Q8NHW5





P05455

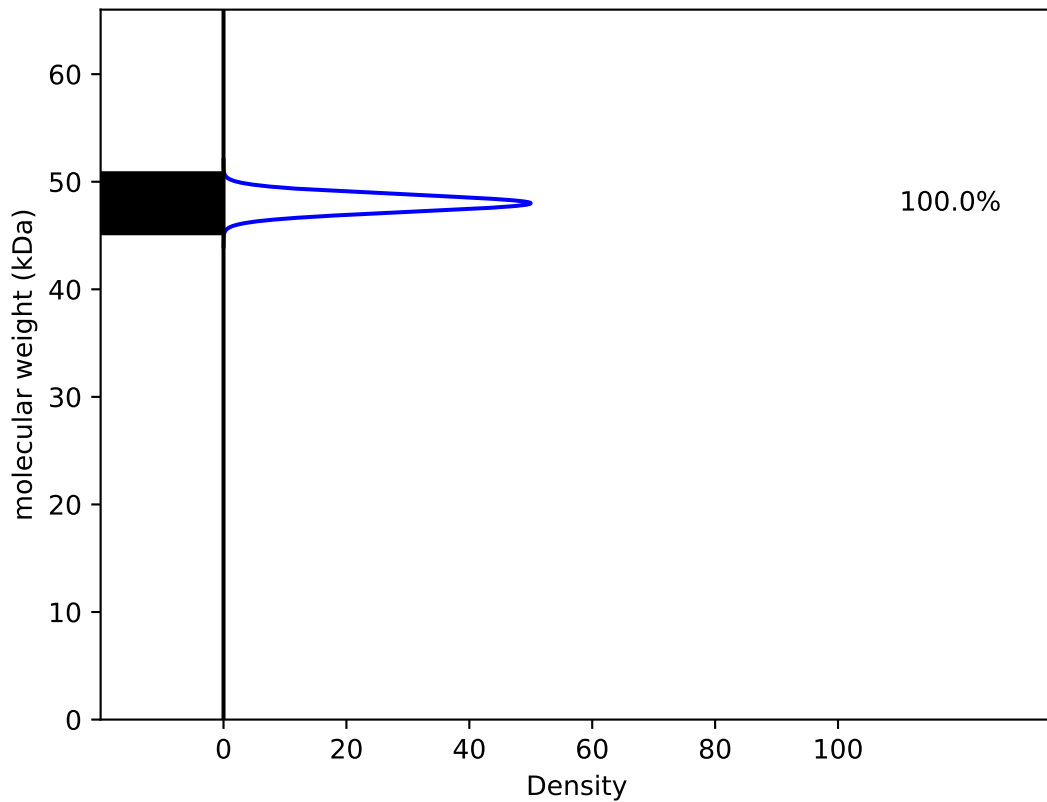

P05534



P30447



P06132

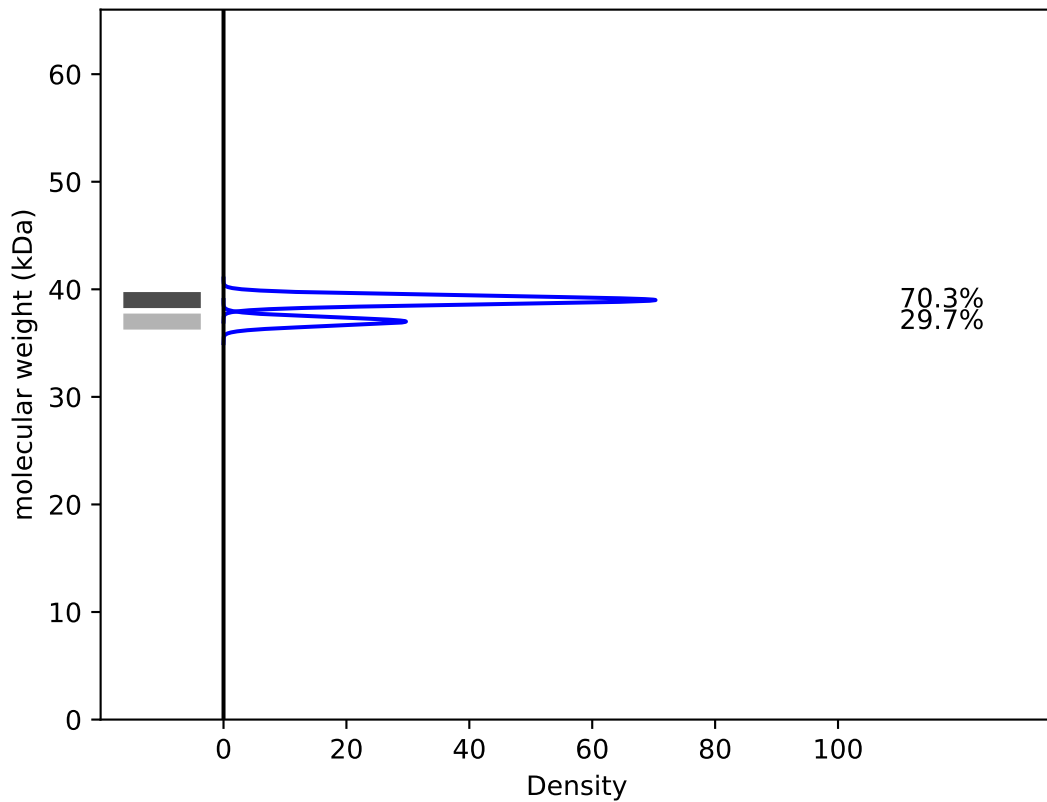

P06493



P06730



# A6NMX2

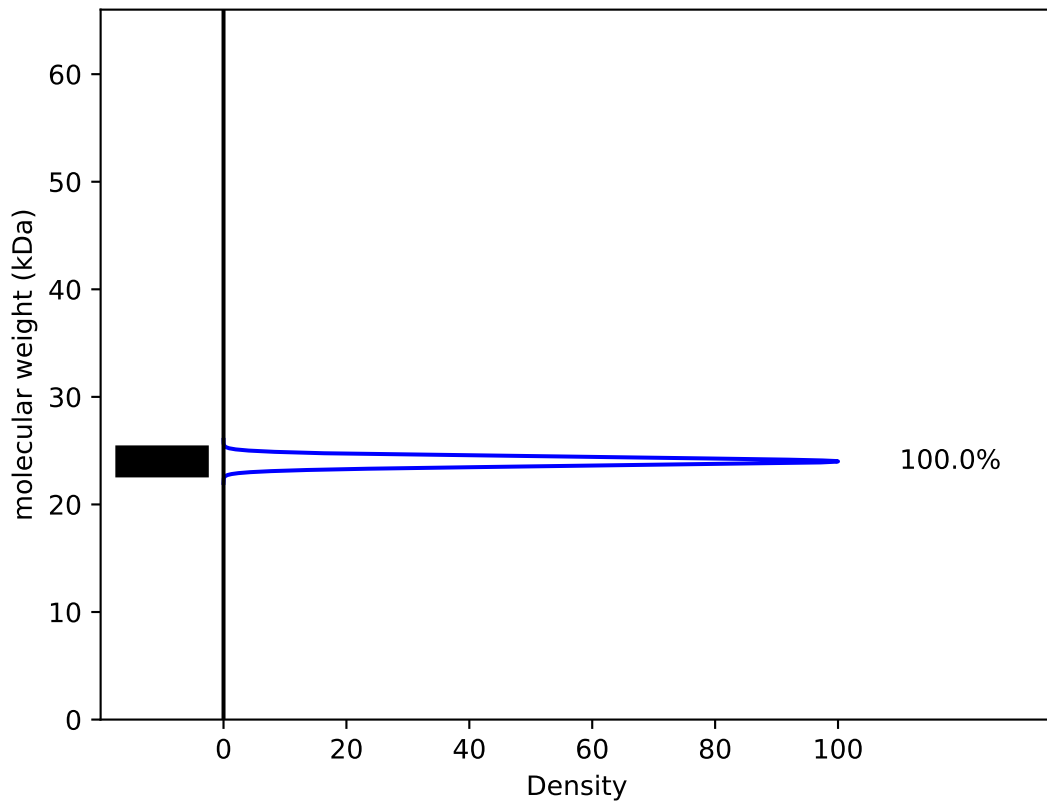

P06733

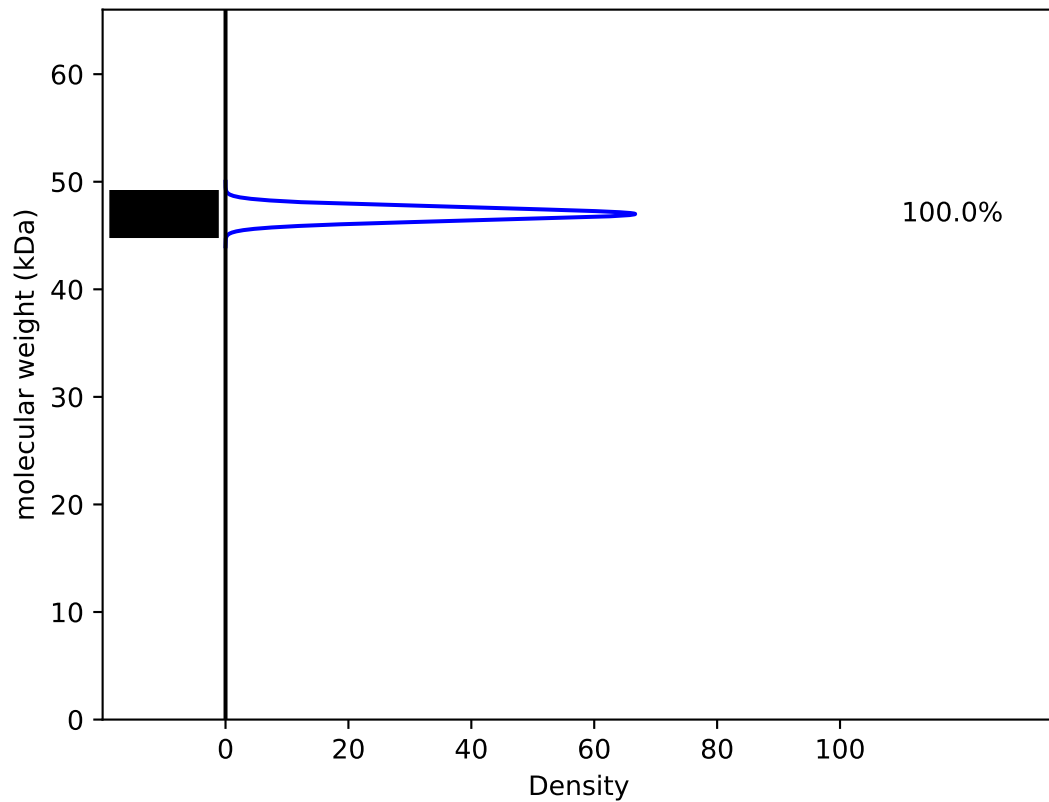



# P13929

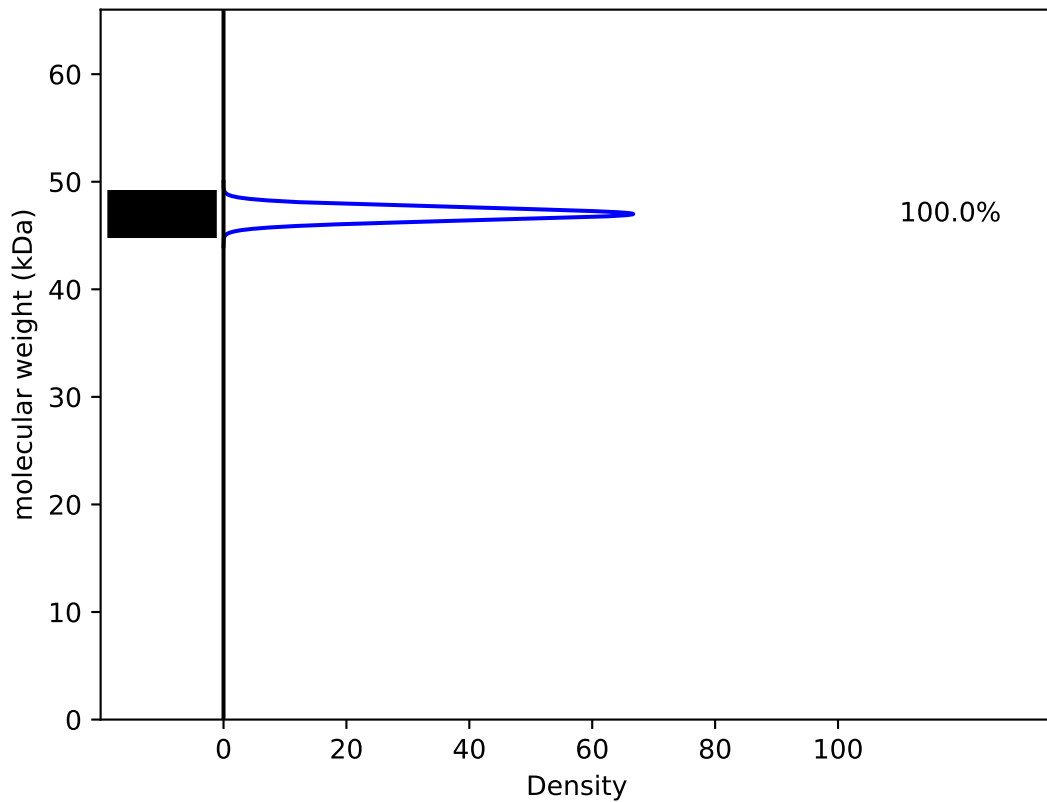

P06748



P06753



P07195



P07203

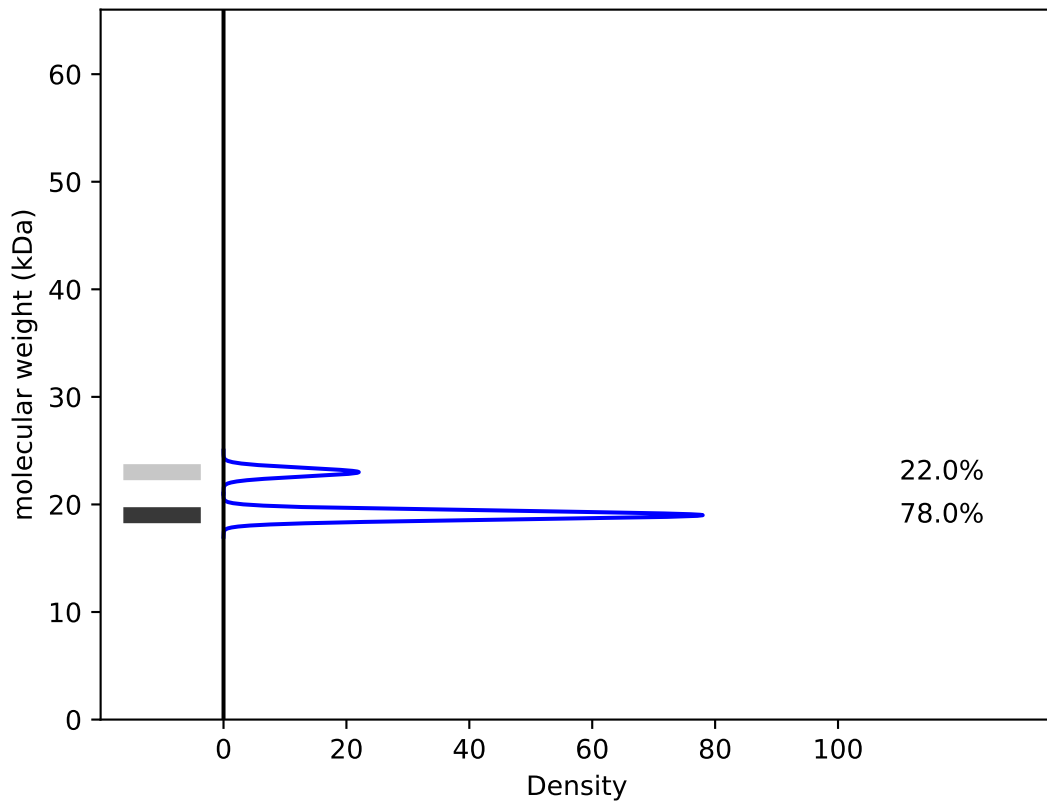

P07237



P07355



# A6NMY6





P07437

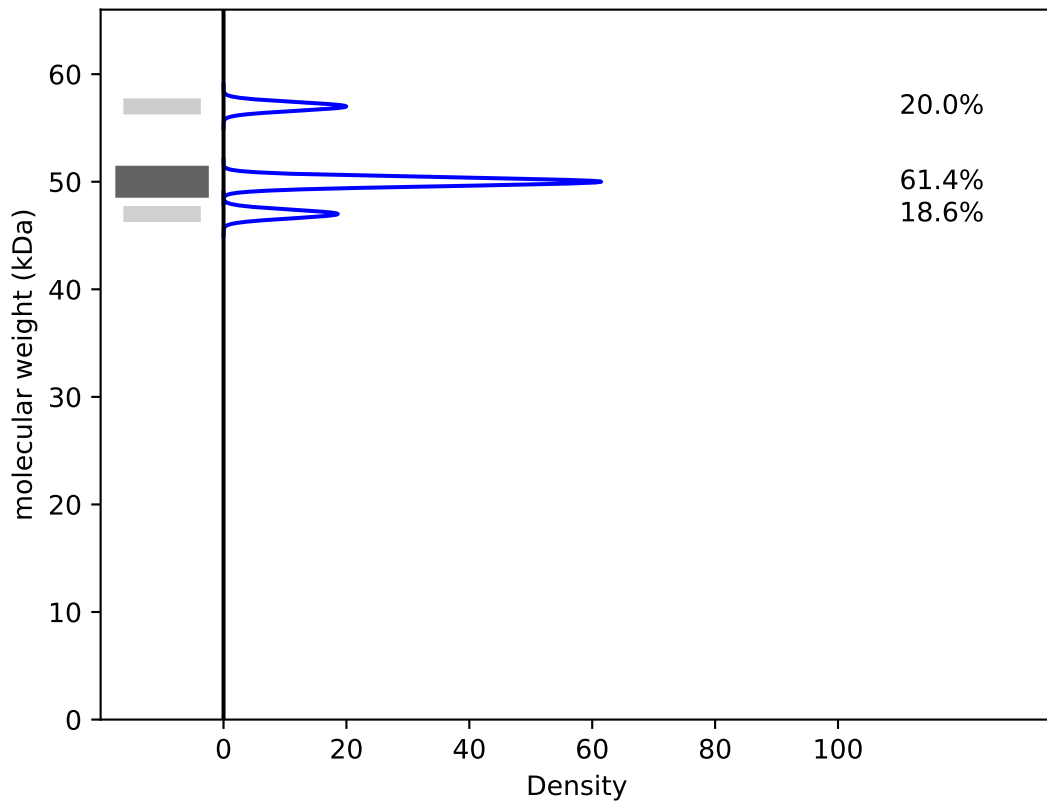

# A6NNZ2



# Q9H4B7

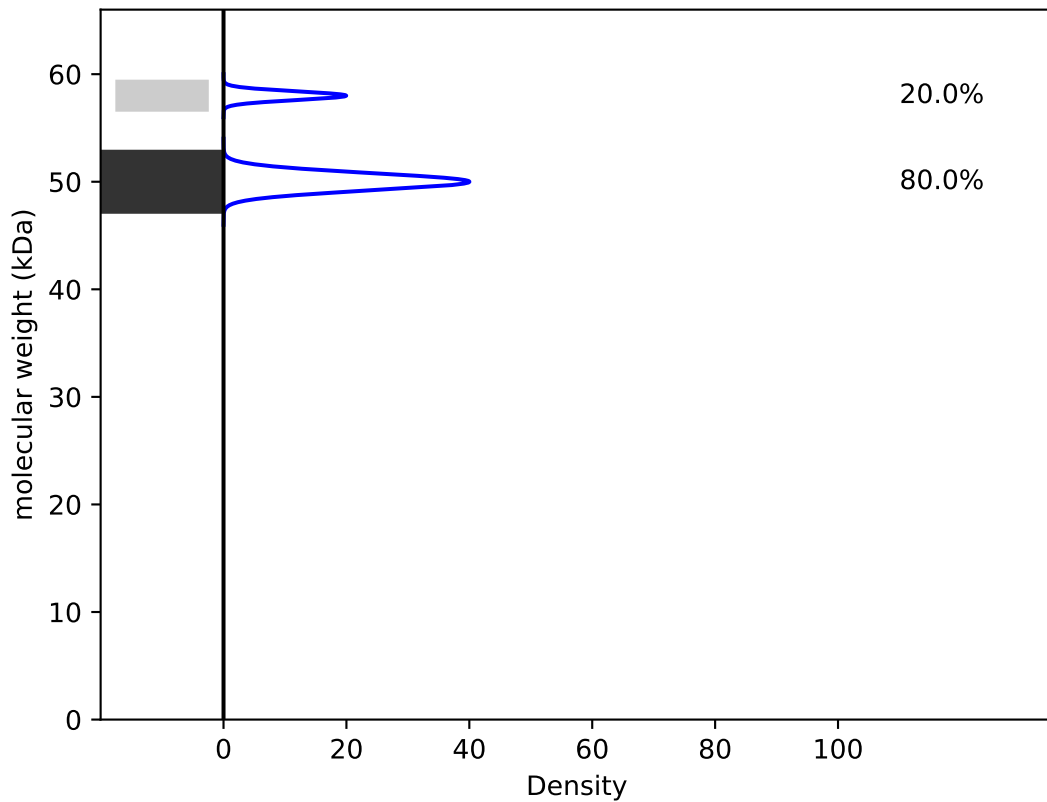

P07711



P07737

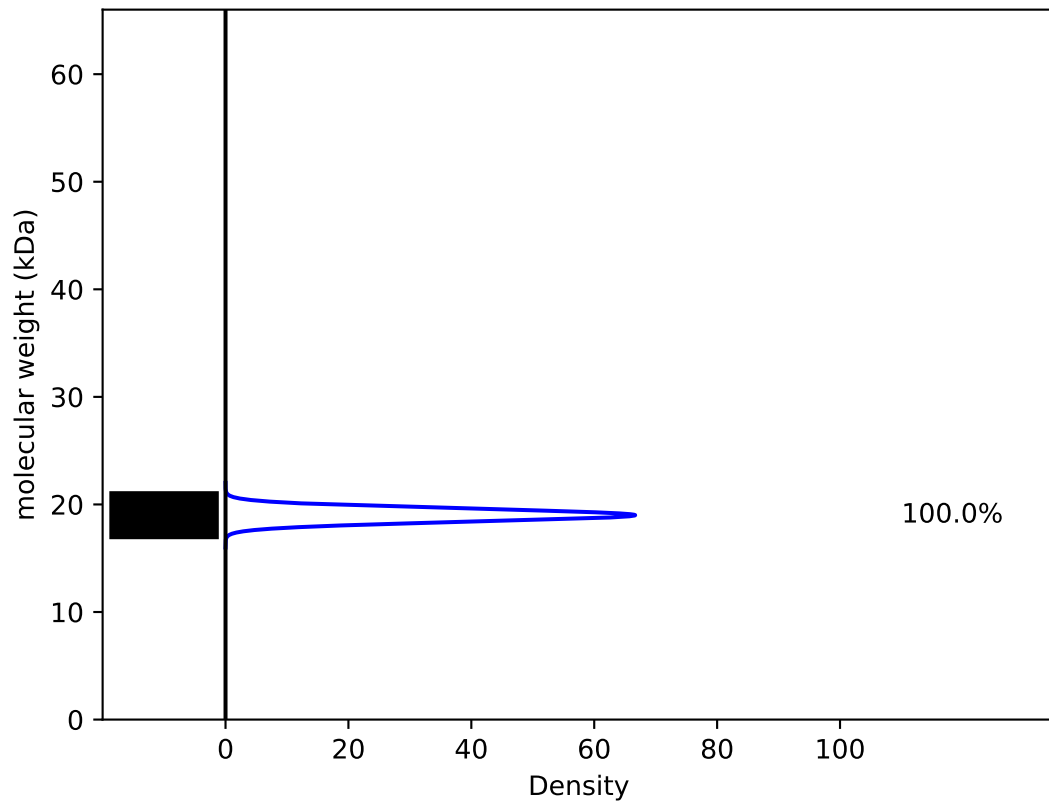

P07741

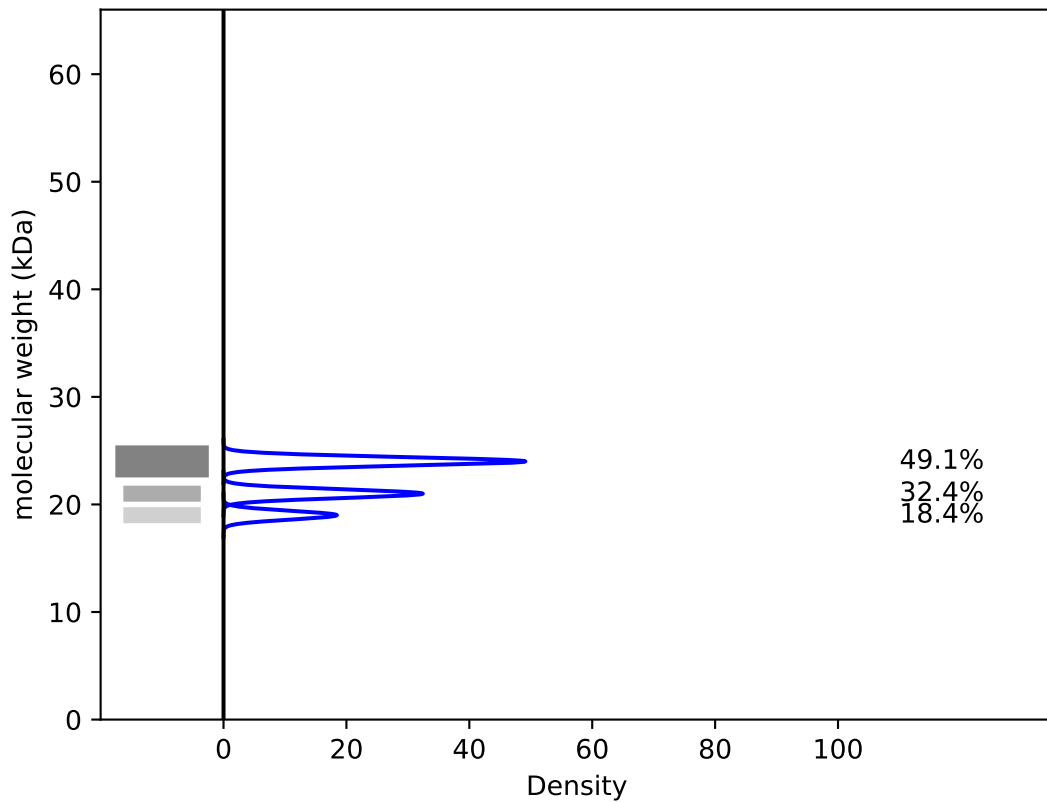

# Q14568



# Q58FG0





P07910



O60812



# B2RXH8



# PODMR1



# B7ZW38



# Q86SE5



P07951



P09493

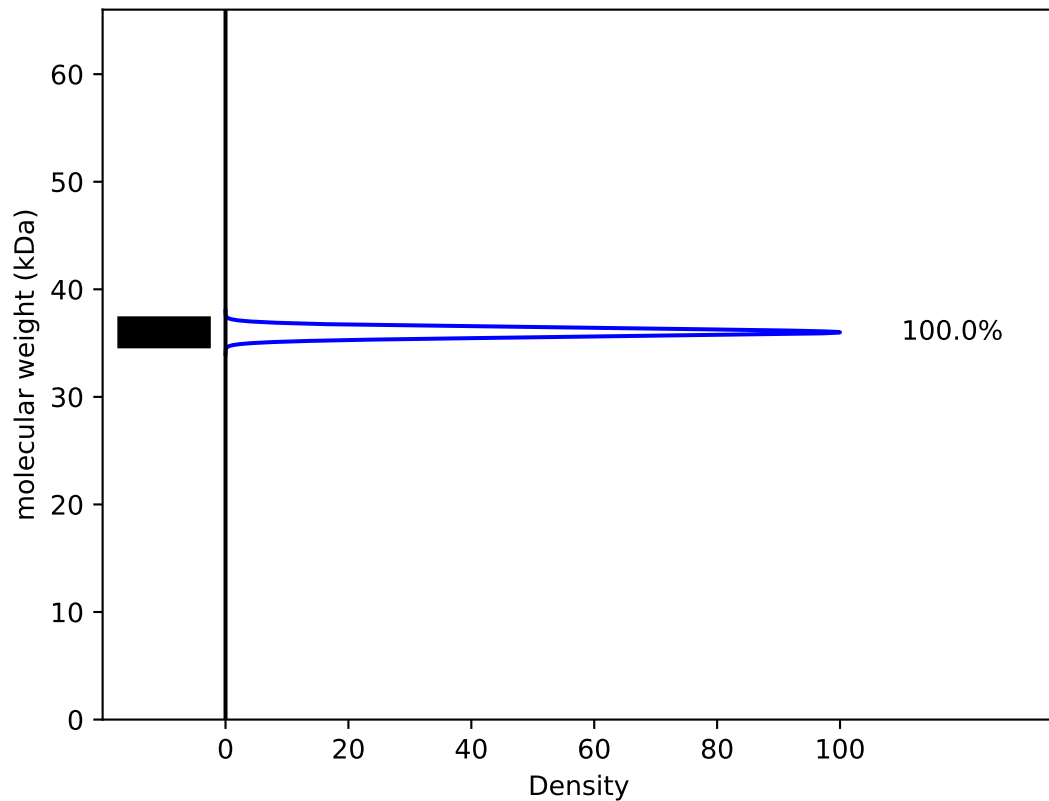



P08559



P29803



P08579



P08670

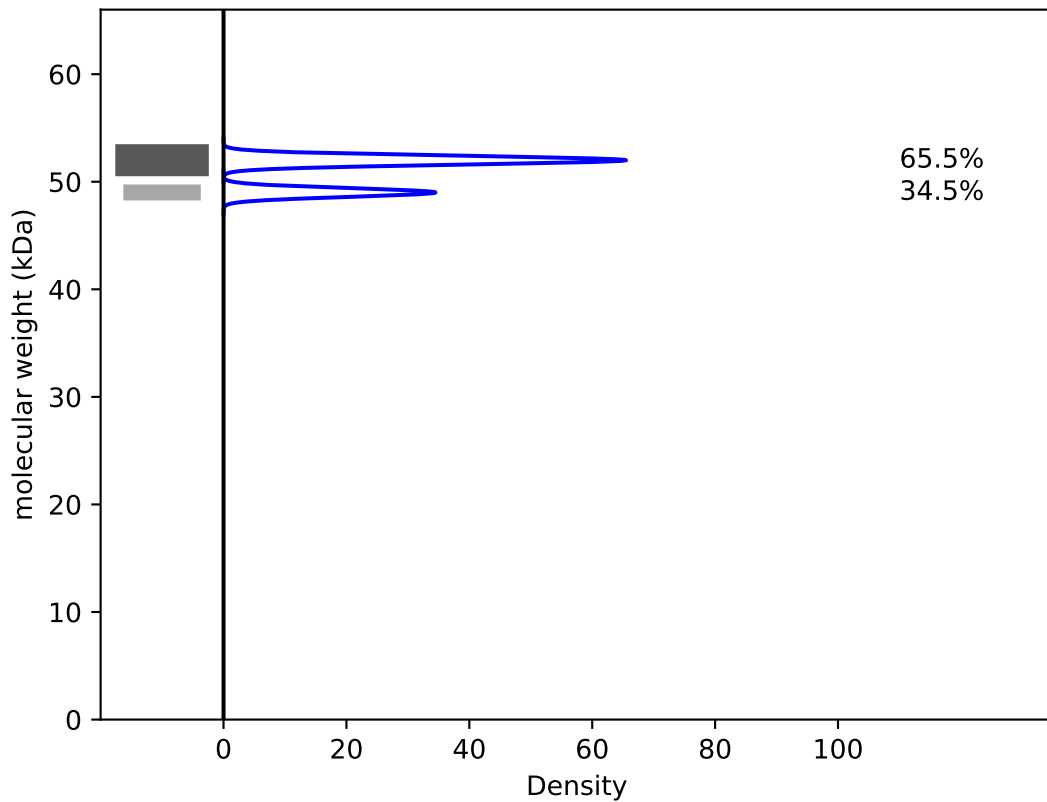

# P41219



# P14136

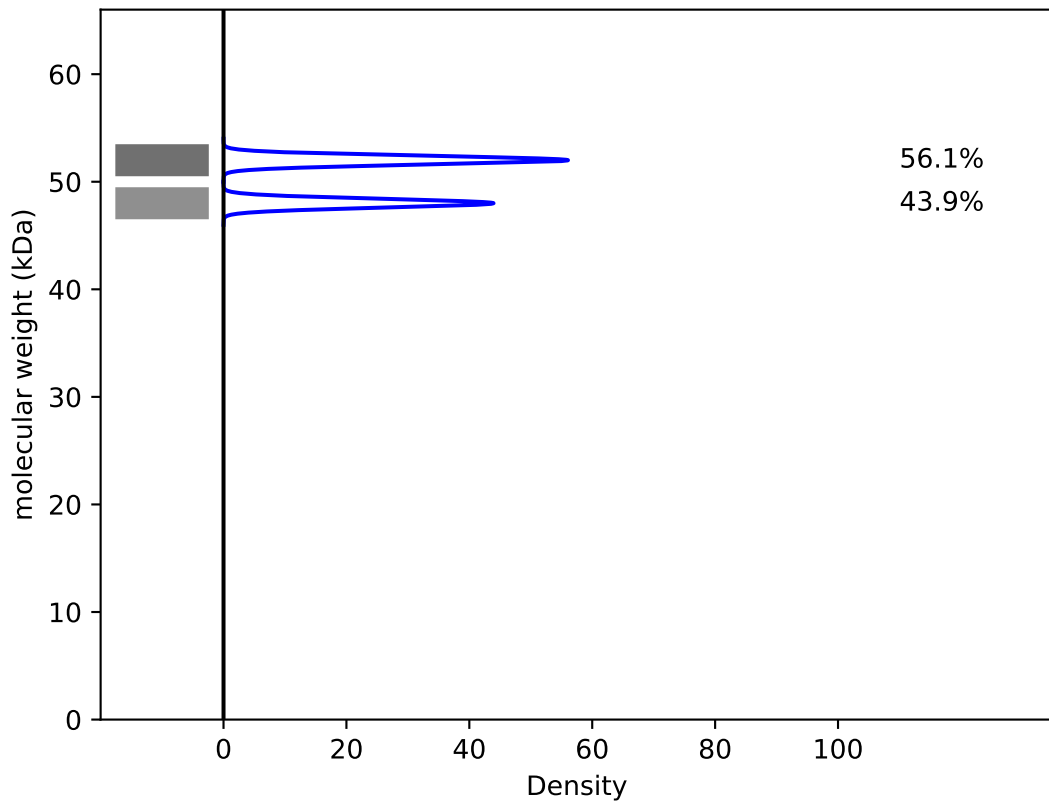

# Q16352

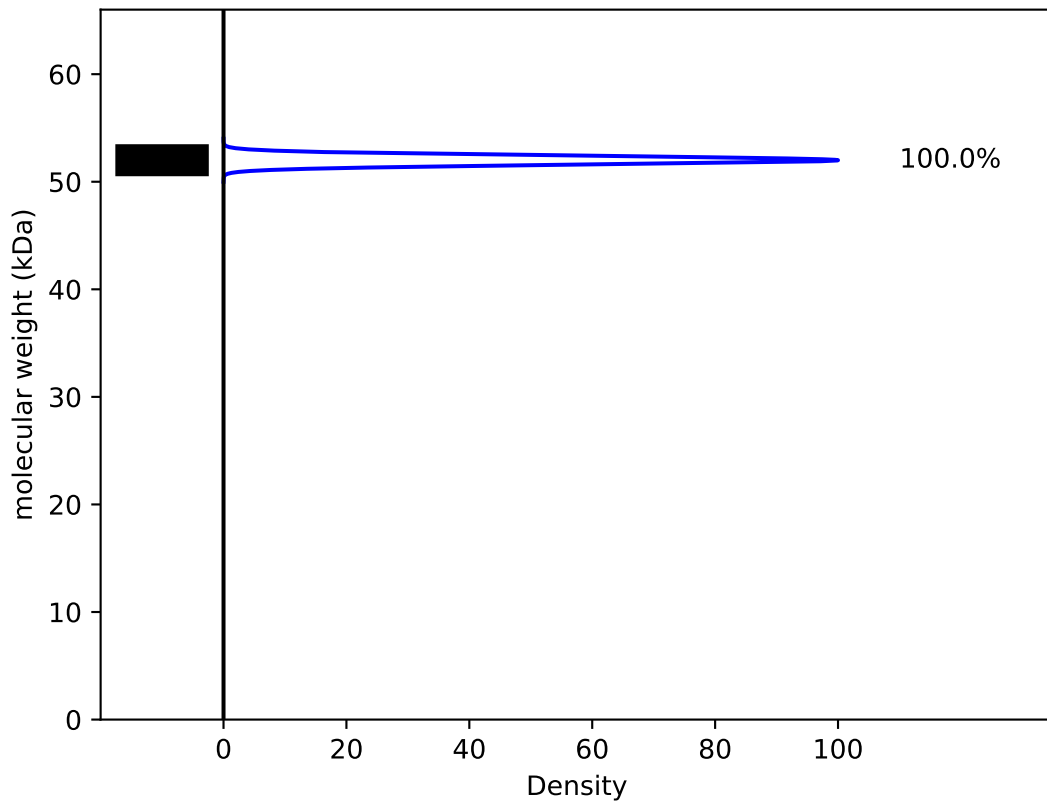

P08708





P08754



P08758



# P08962

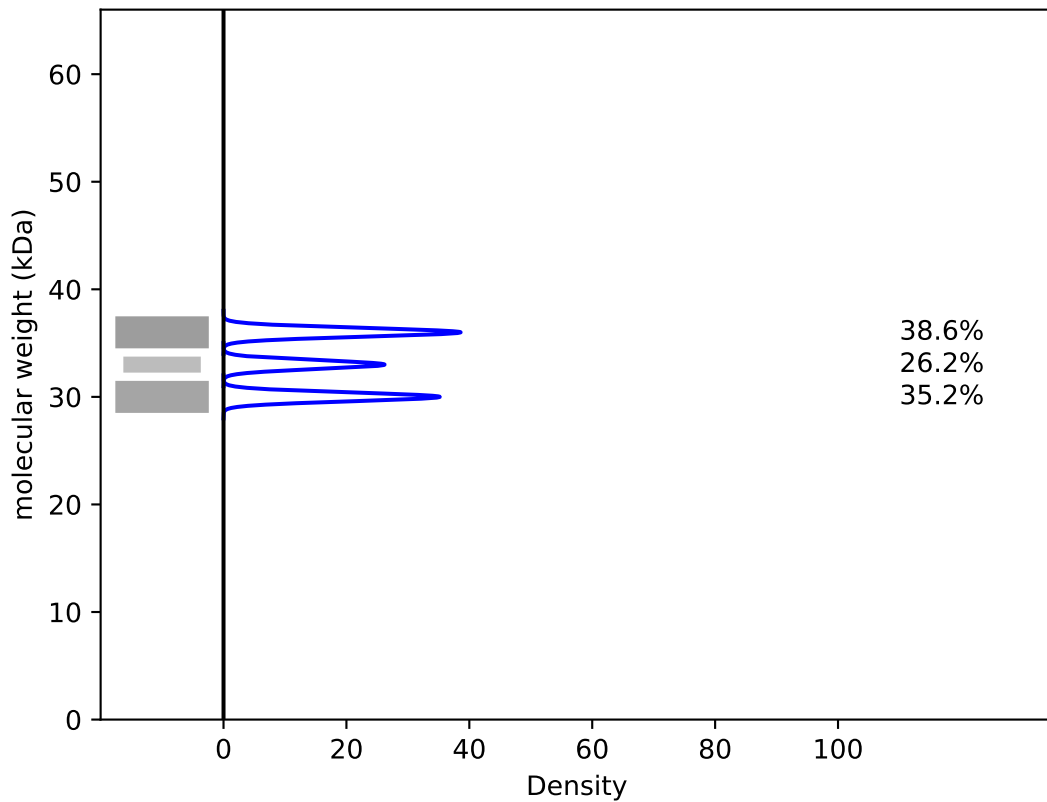

P09001



P09012



P09211

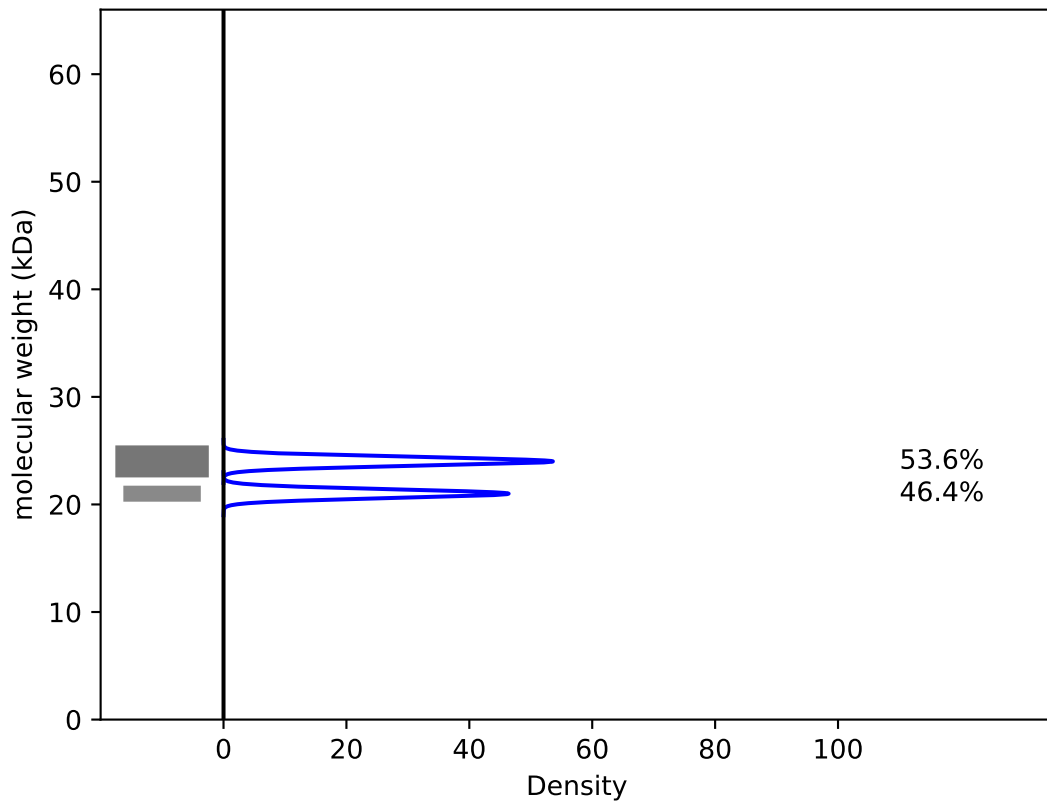

P09382



P09417

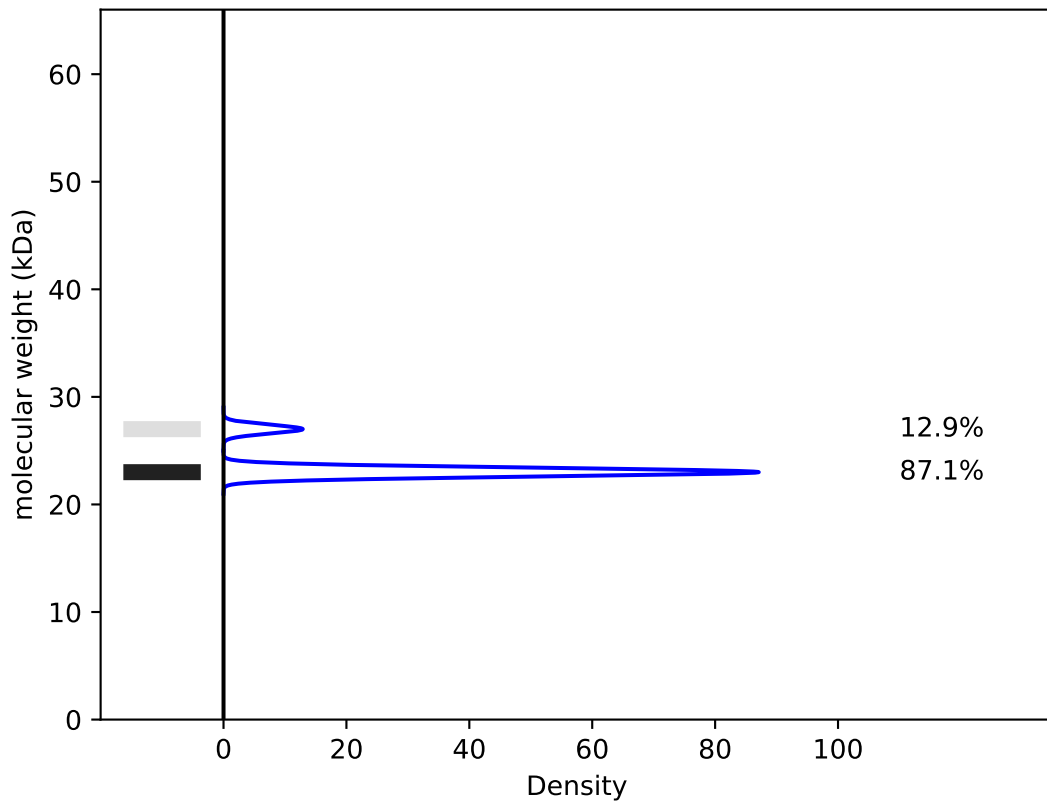



P09429



# B2RPK0



P09488



Q03013



P09622



# Q32P51



P09661



P09972





# Q9BTM1

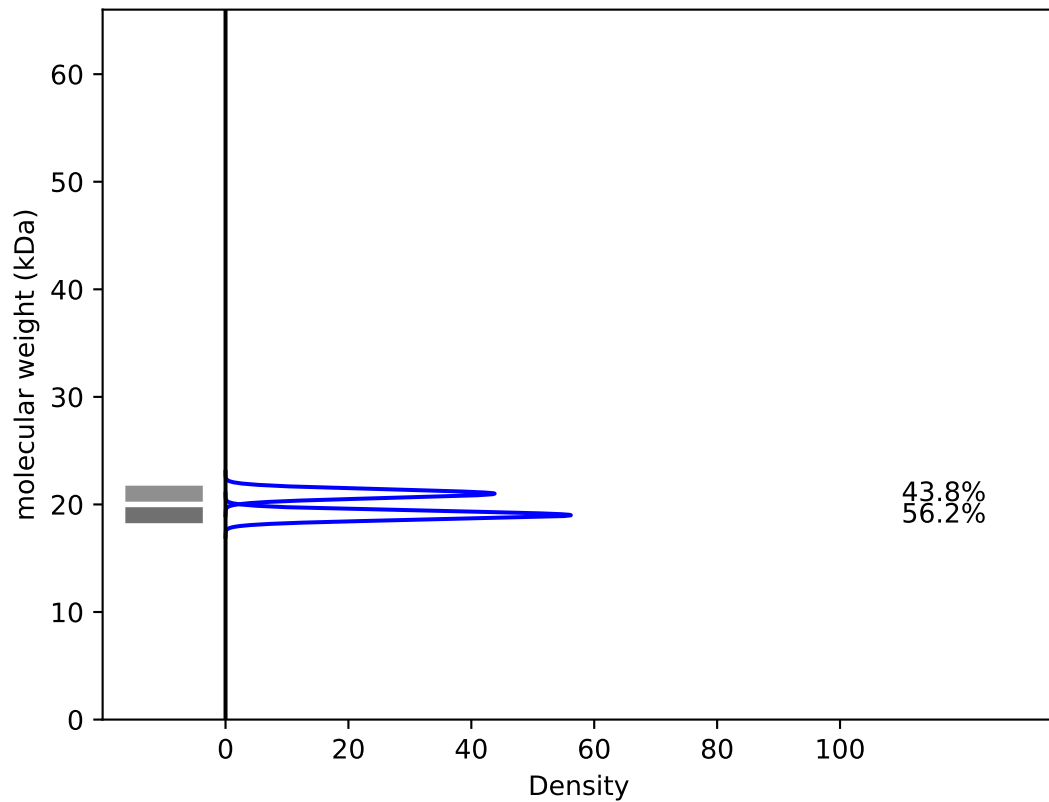

# Q6FI13

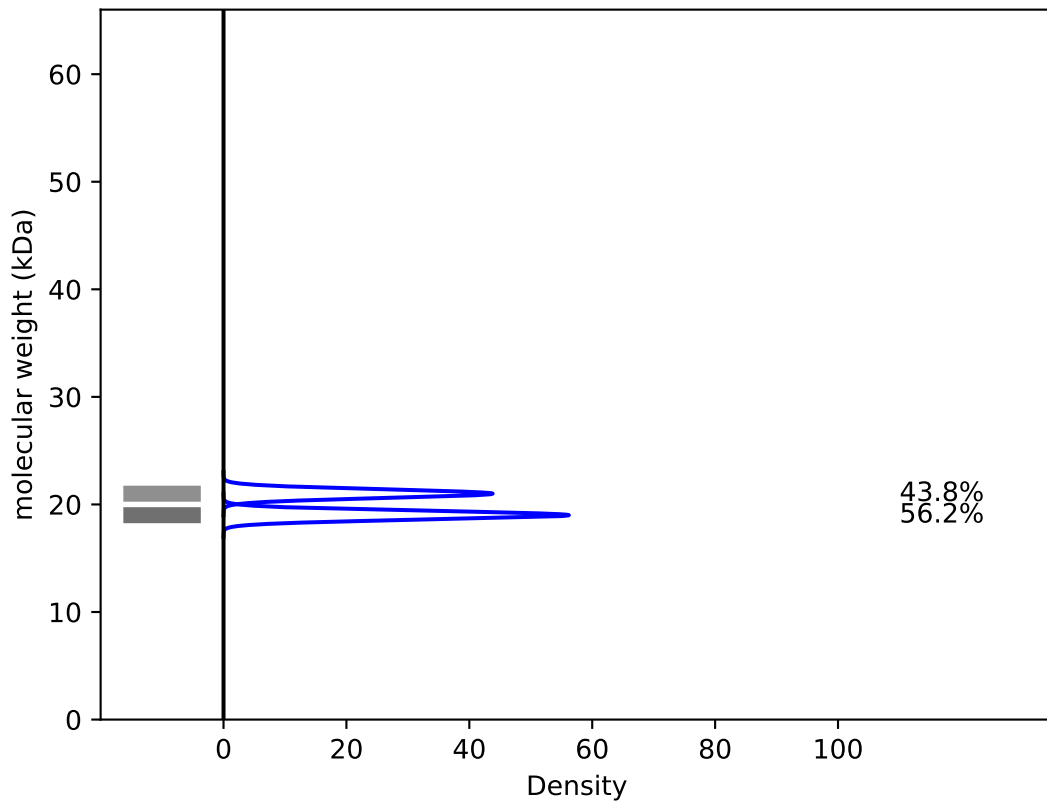

# P20671



# POC0S8



Q93077



# Q7L7L0

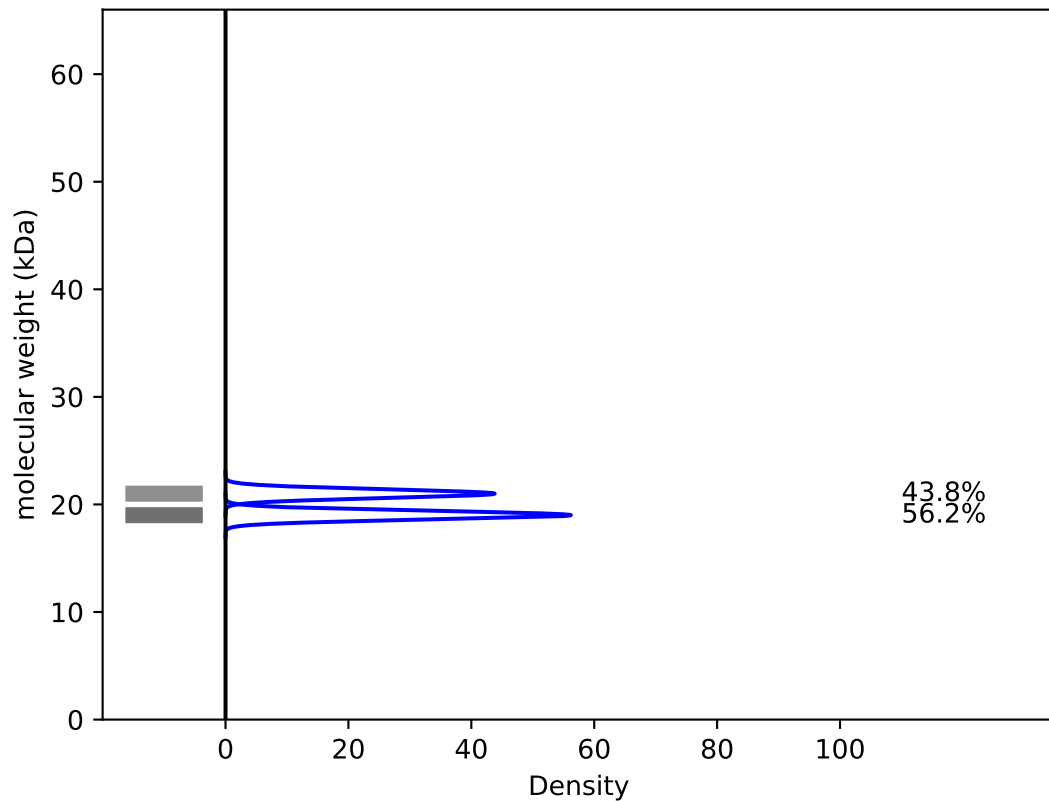

P04908



# Q96QV6





# P16104



# P62987

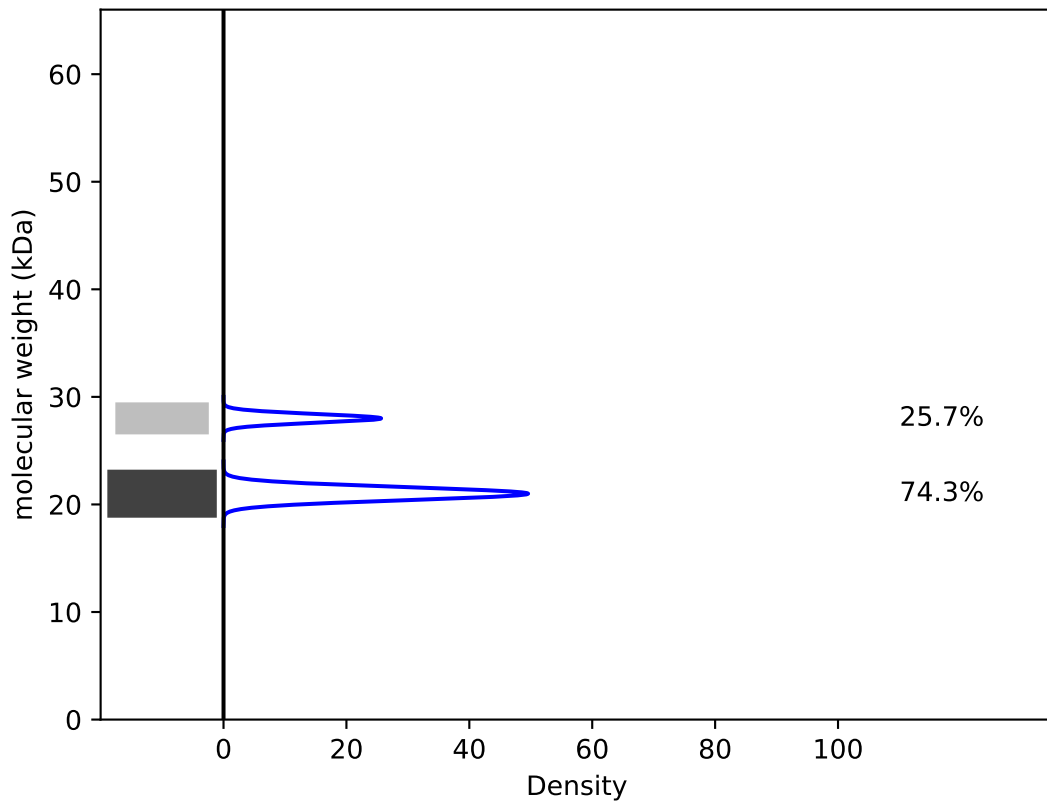

# P62979



# P0CG47

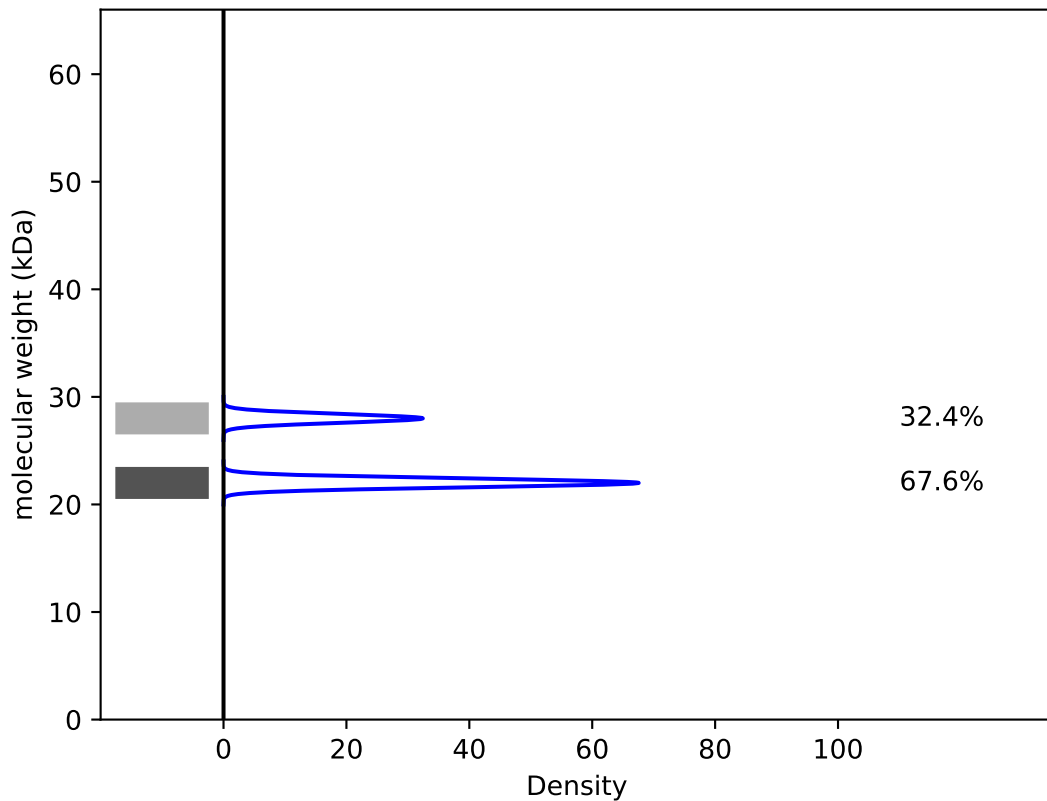

# Q01081

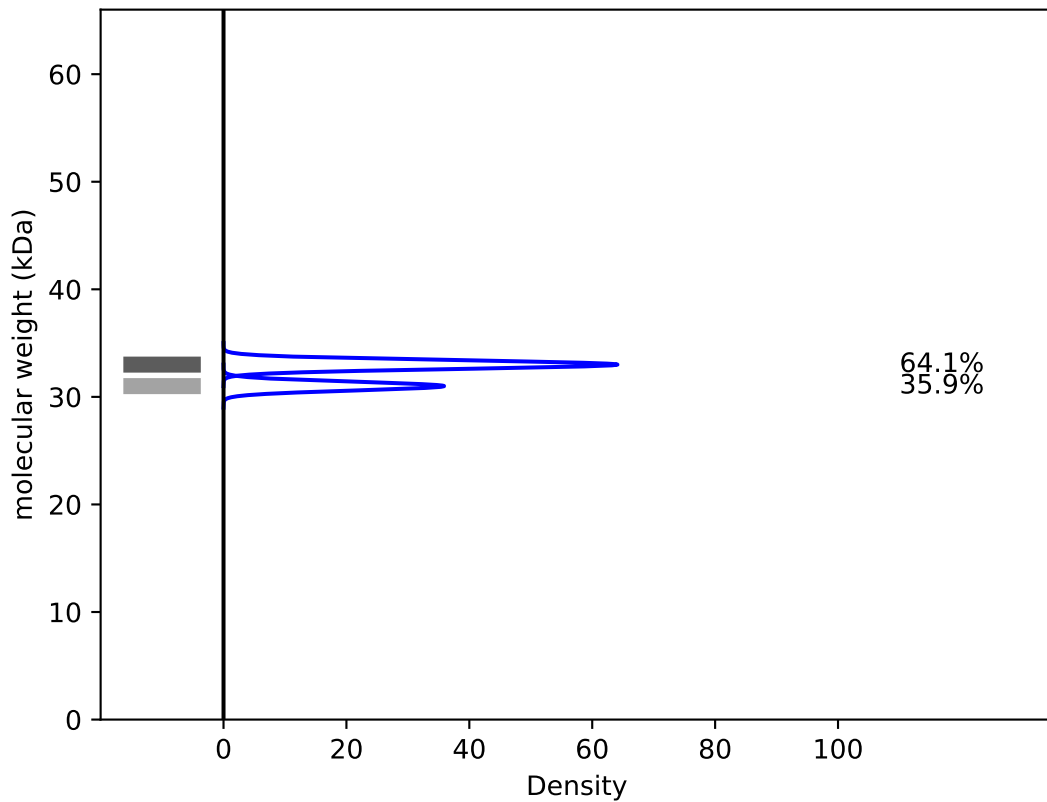

# PODN76



# P10316



# P01892





# P10620

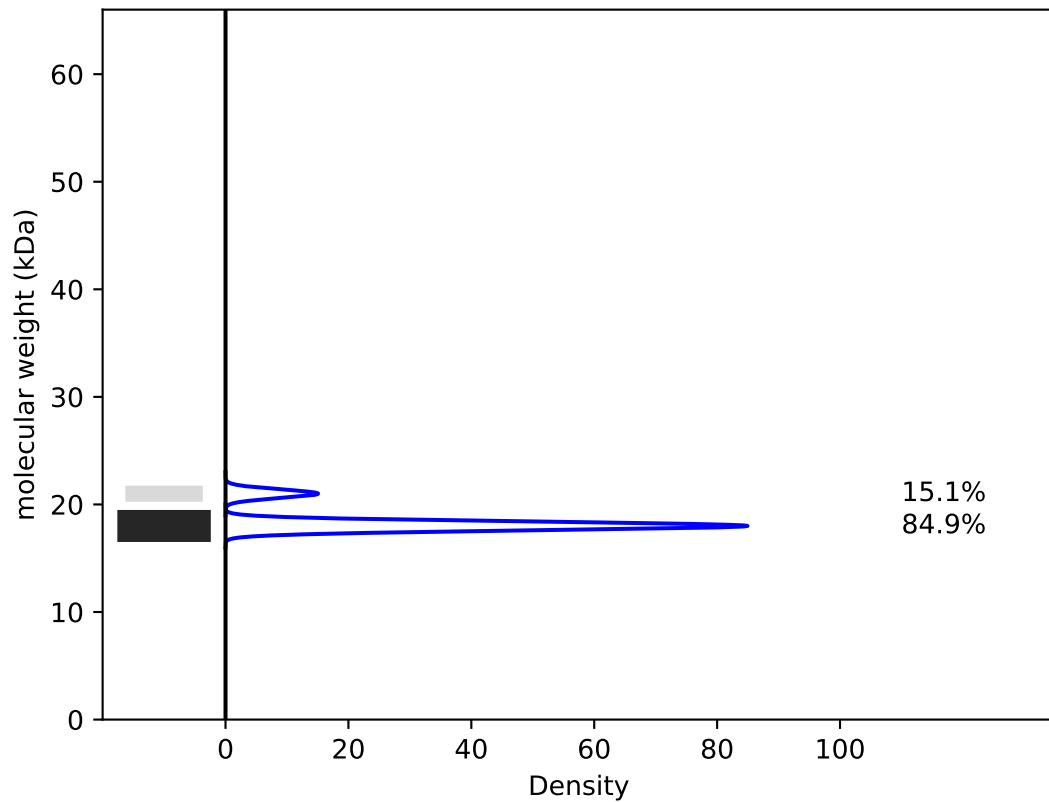

# P10644

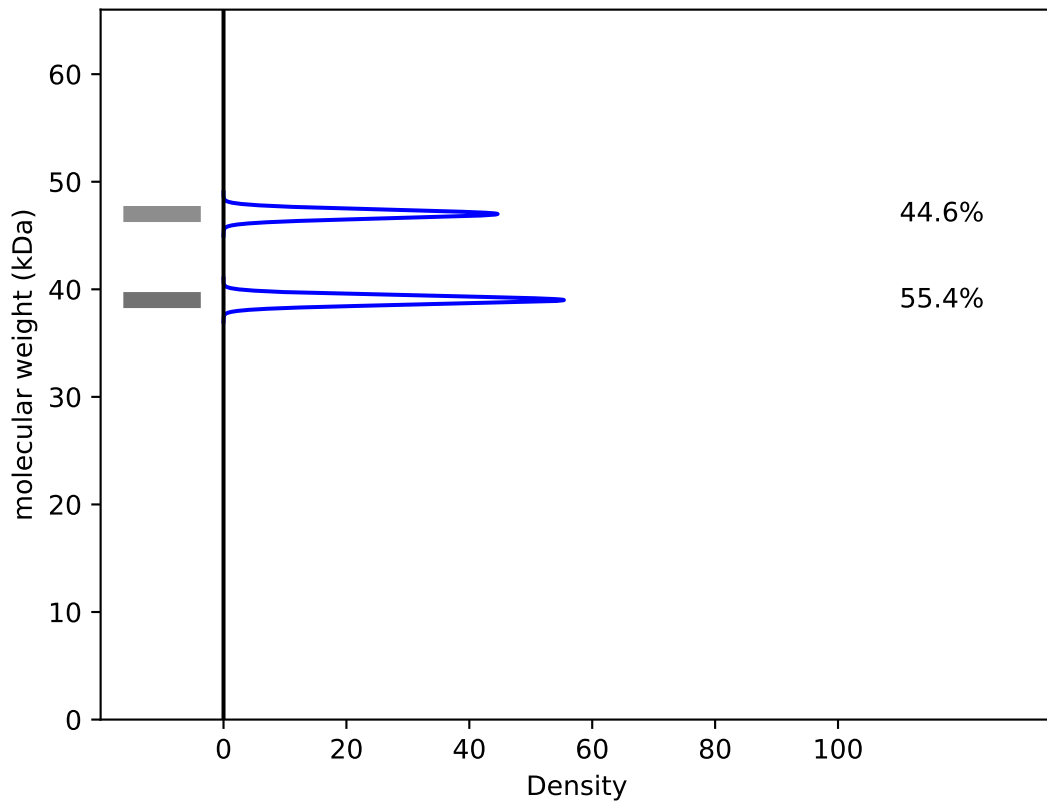

P10768



# P10809



# P11172

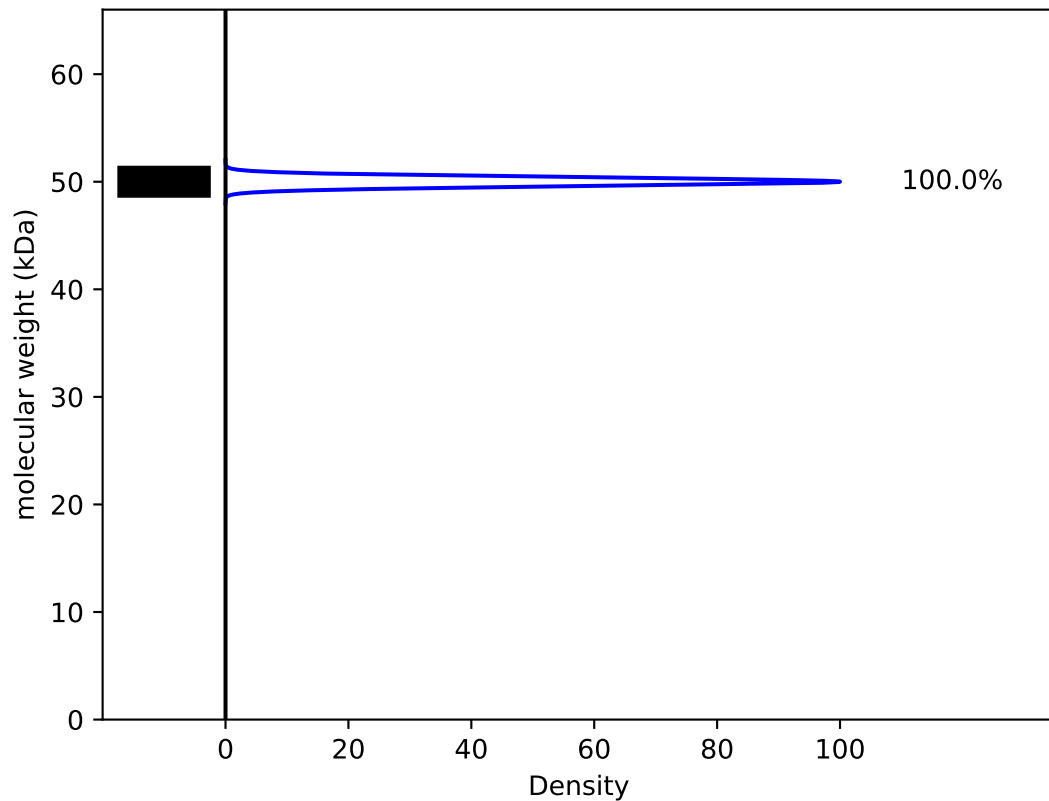

# P11177

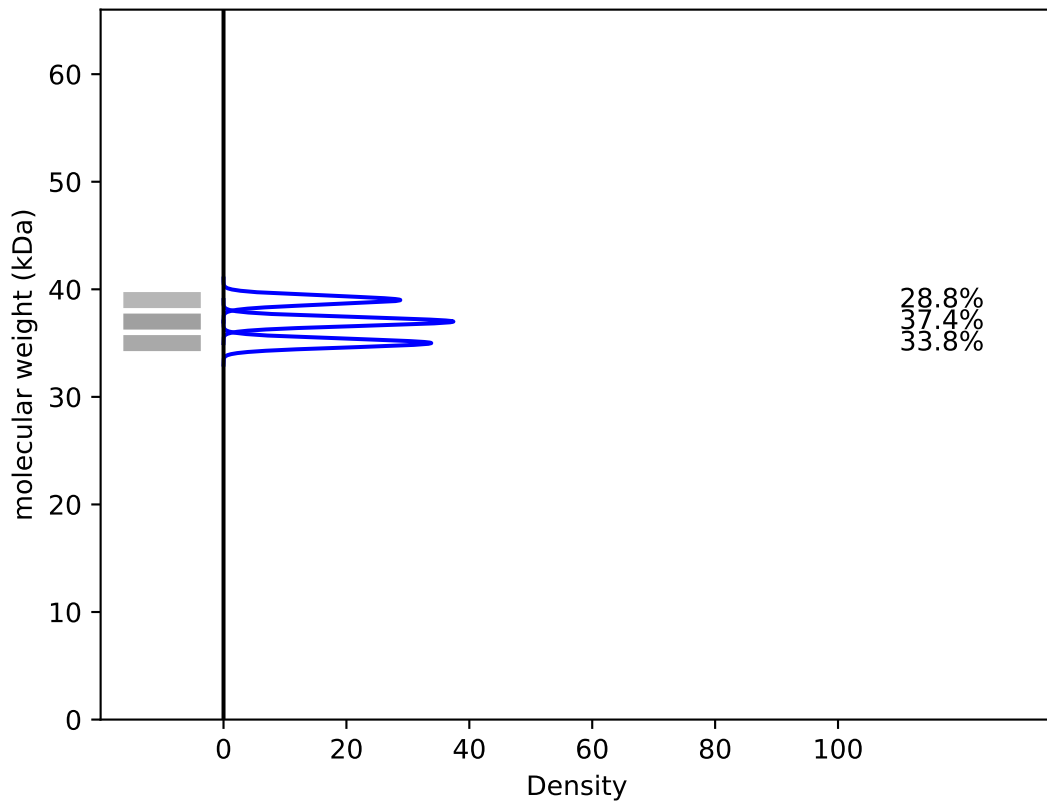

# P11233



# P11234





# P11310



# P11413

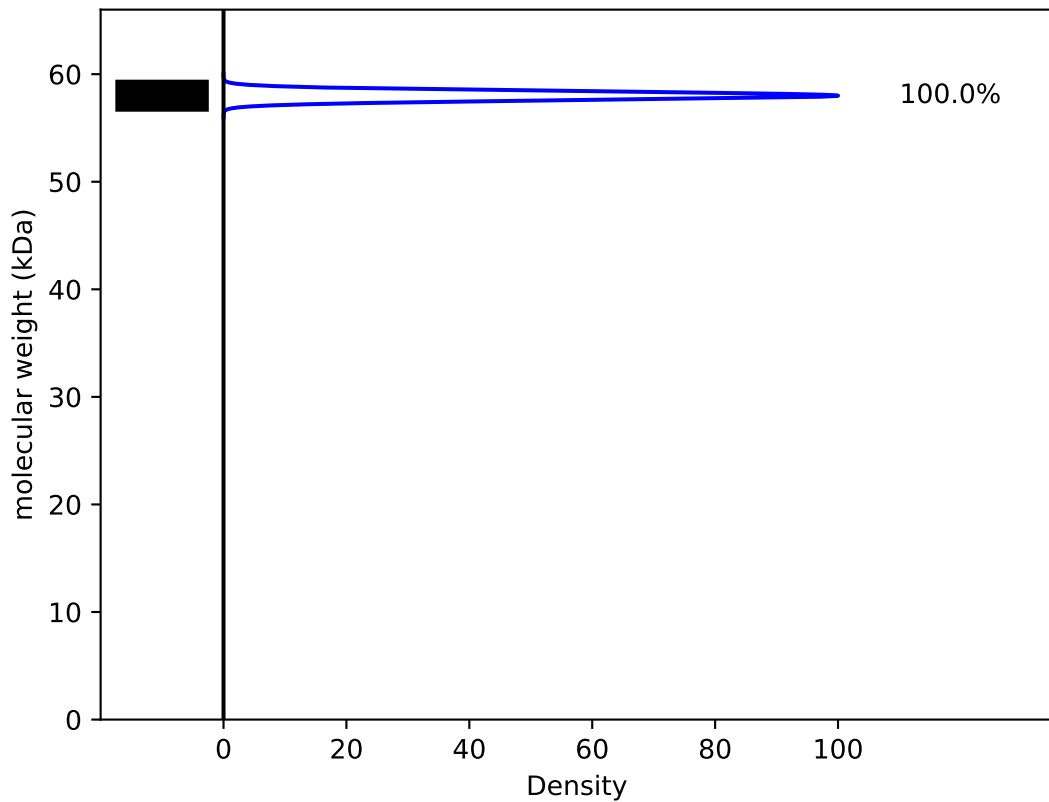

# P11766



# P11802

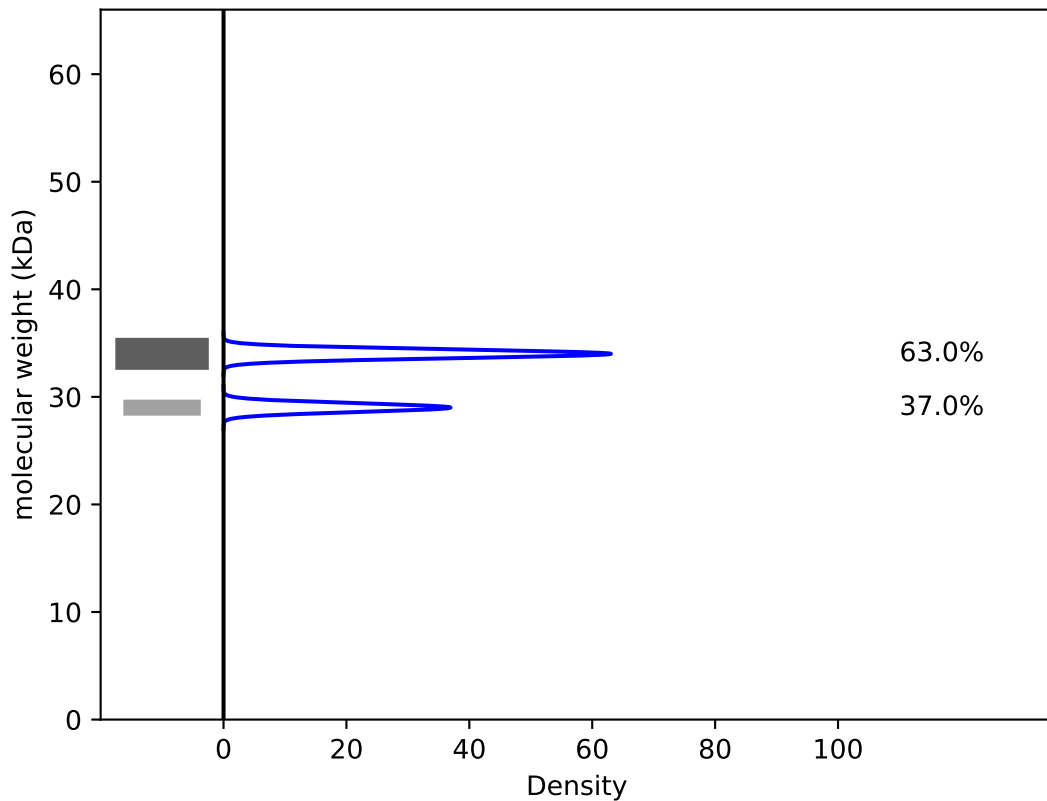

# P11908

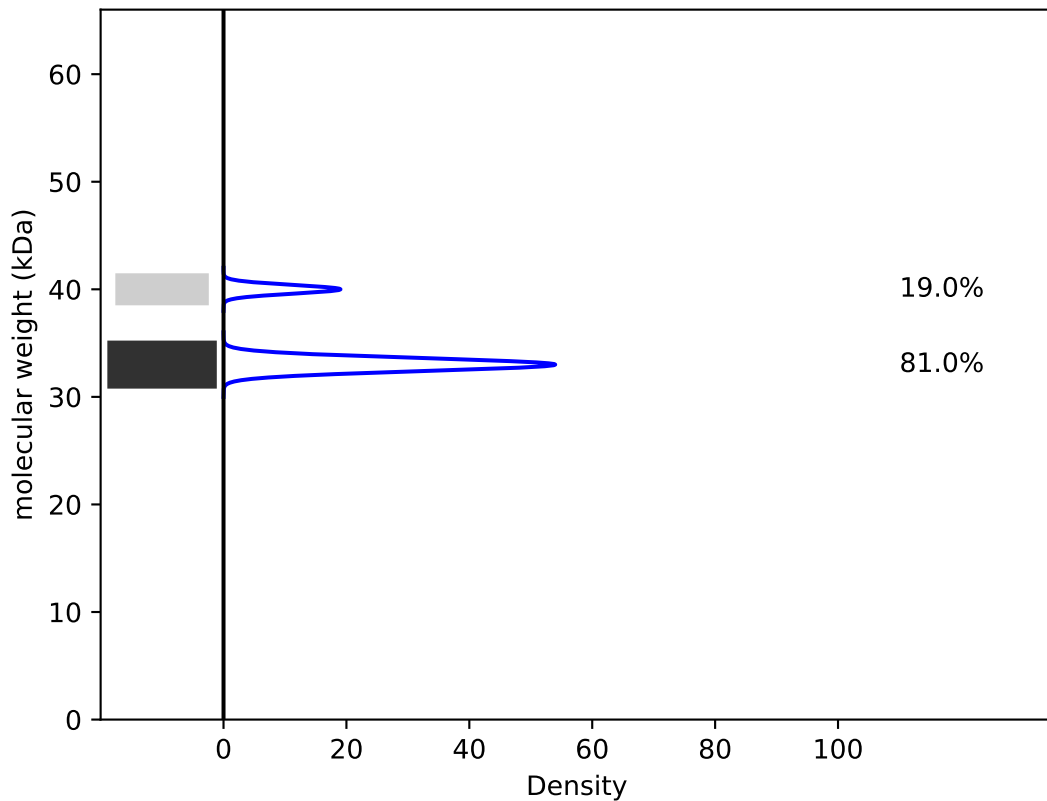

# P12004

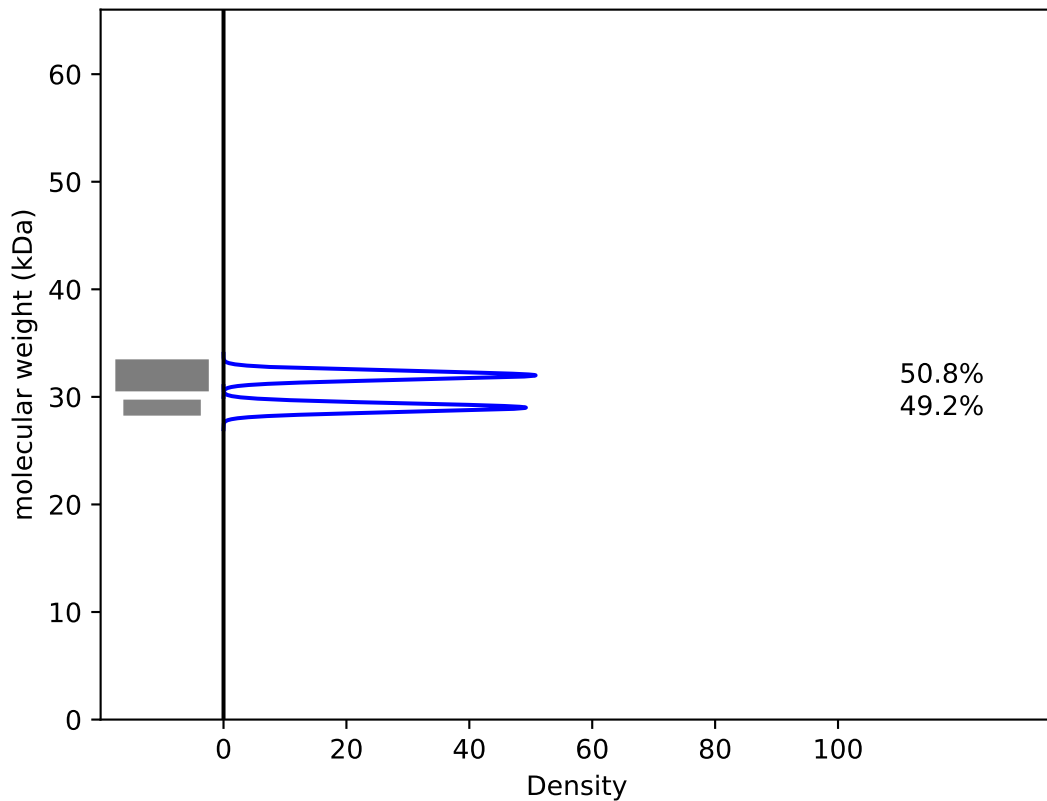

# P12236

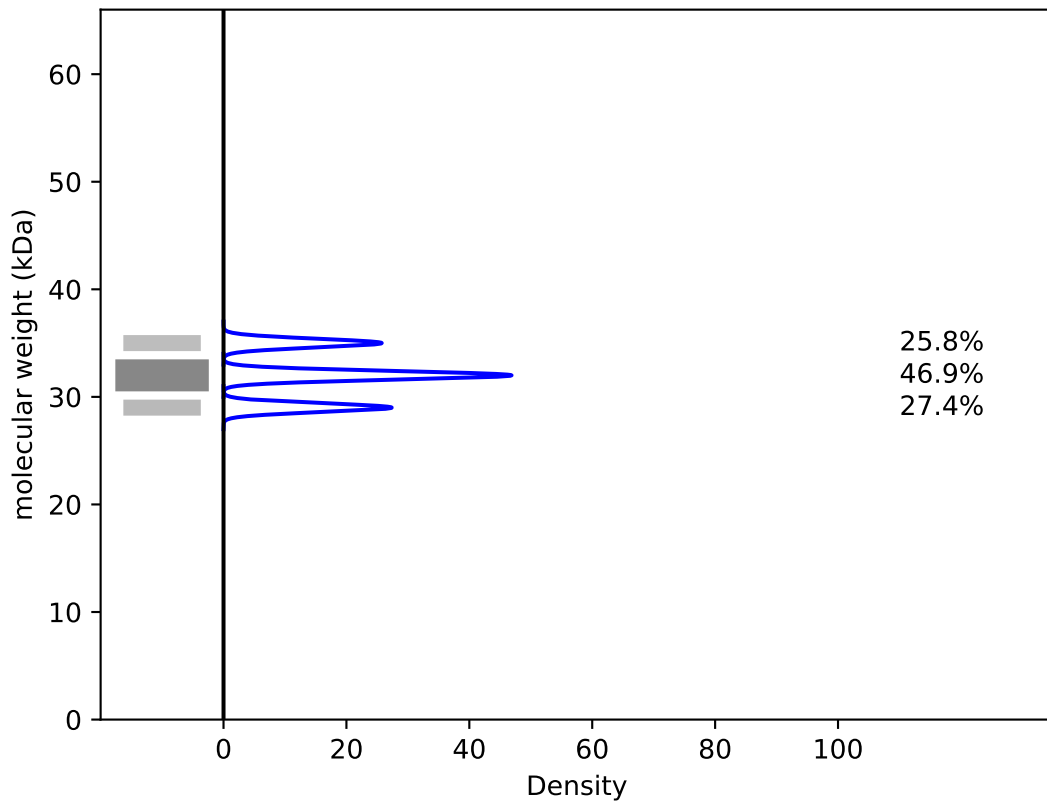

# P12268

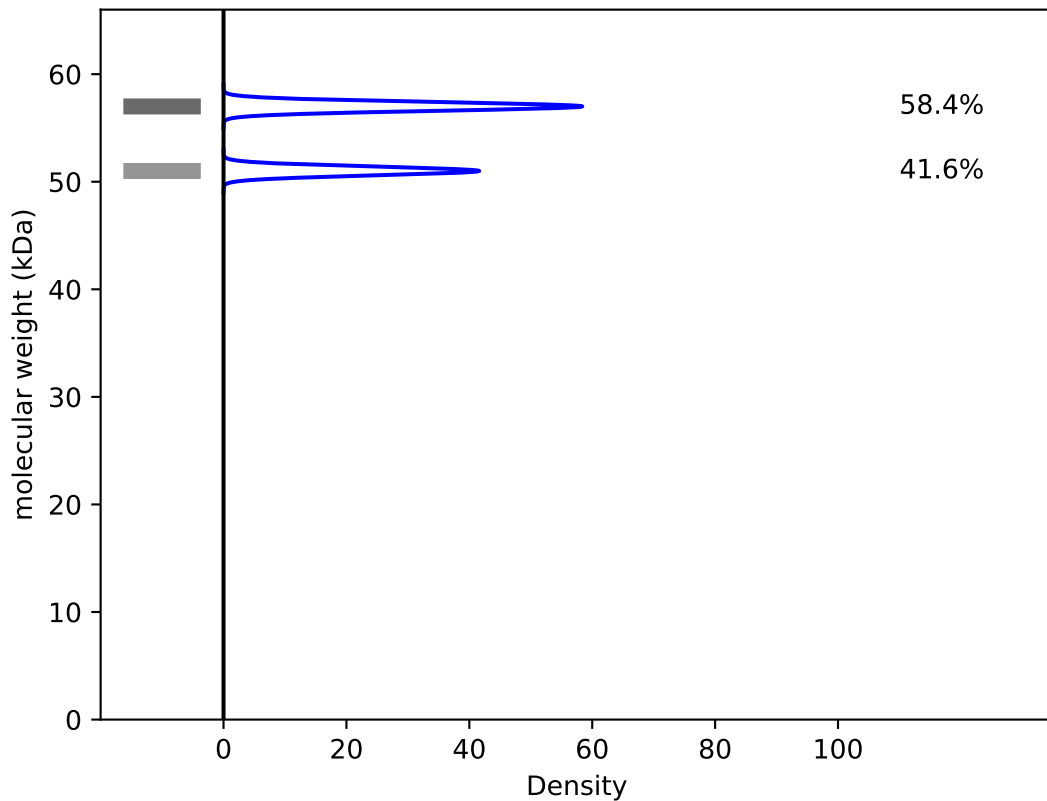



# P12277

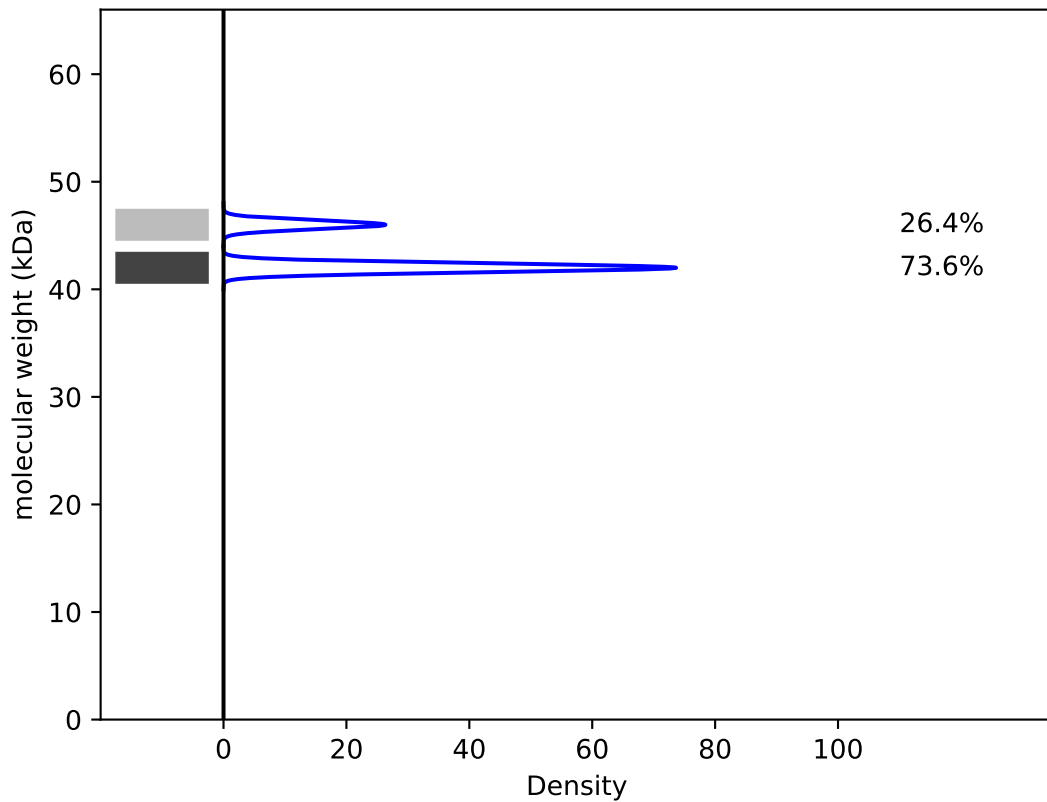

P06732

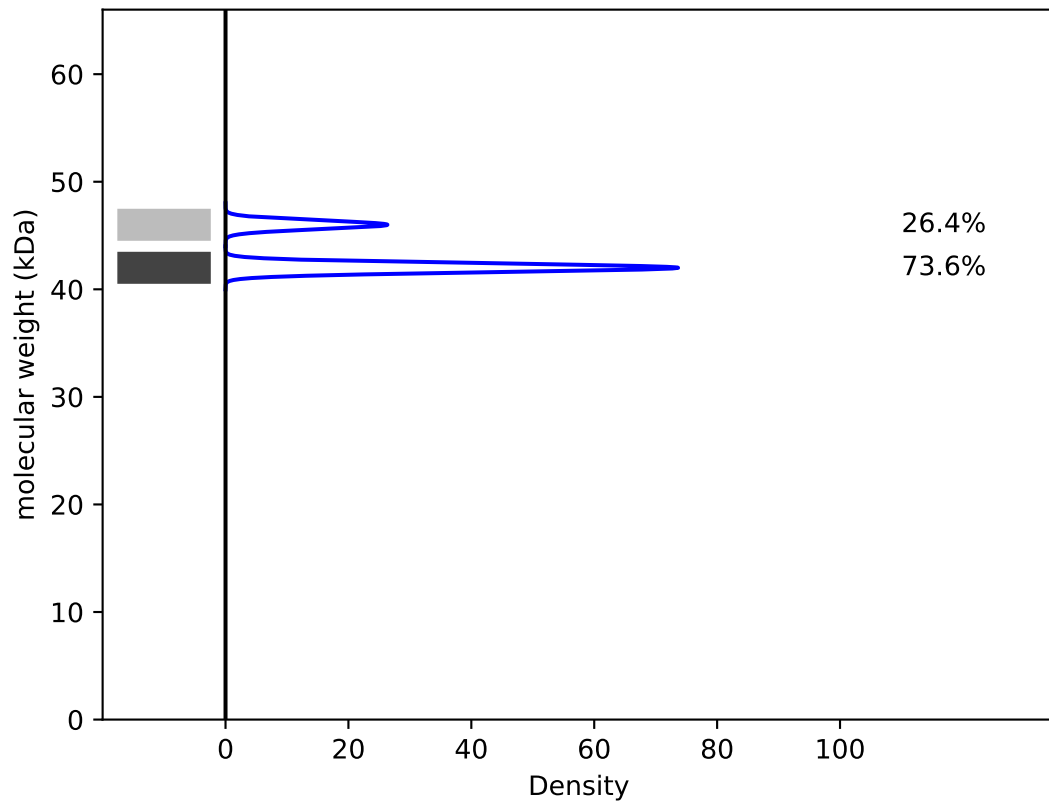

# P12955



# P13489

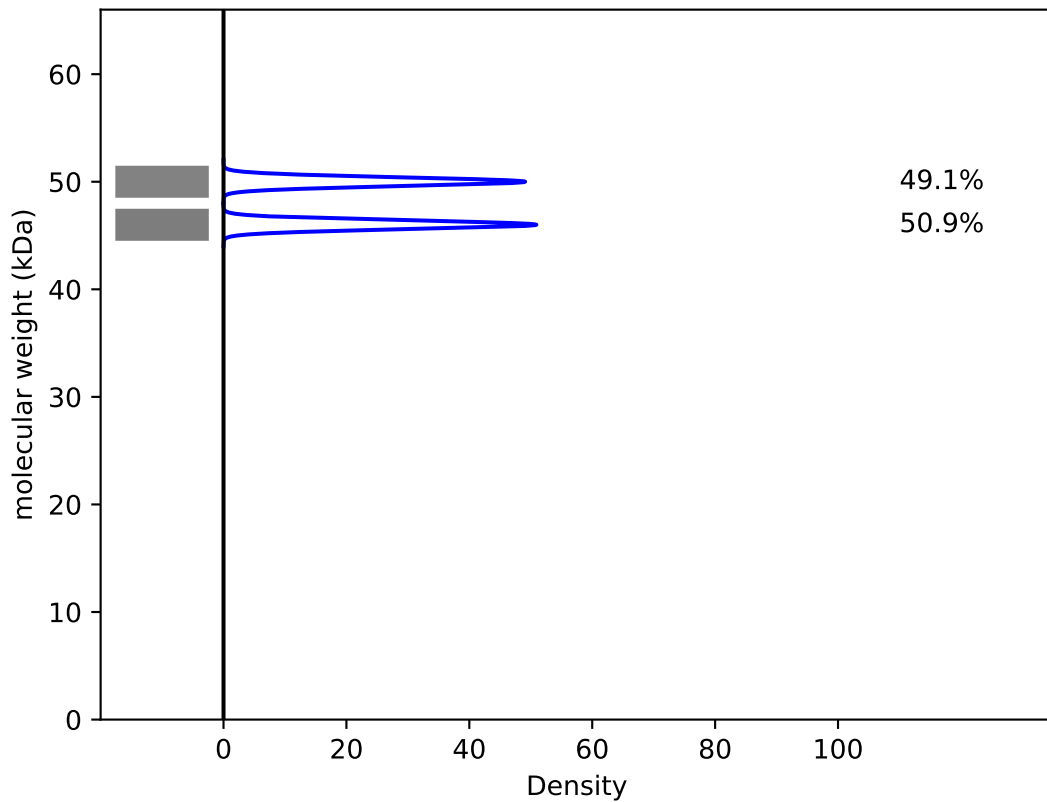

# P13674



# P13693

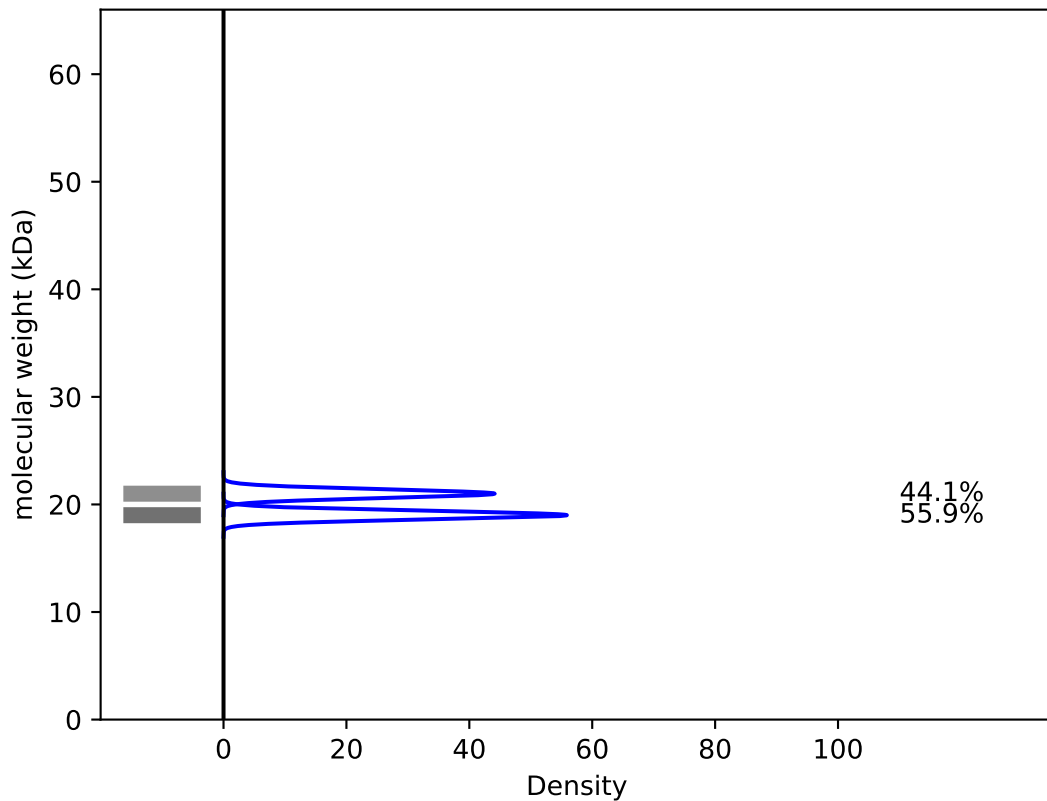

# Q9HAU6



# Q56UQ5





# P13804



# P13861

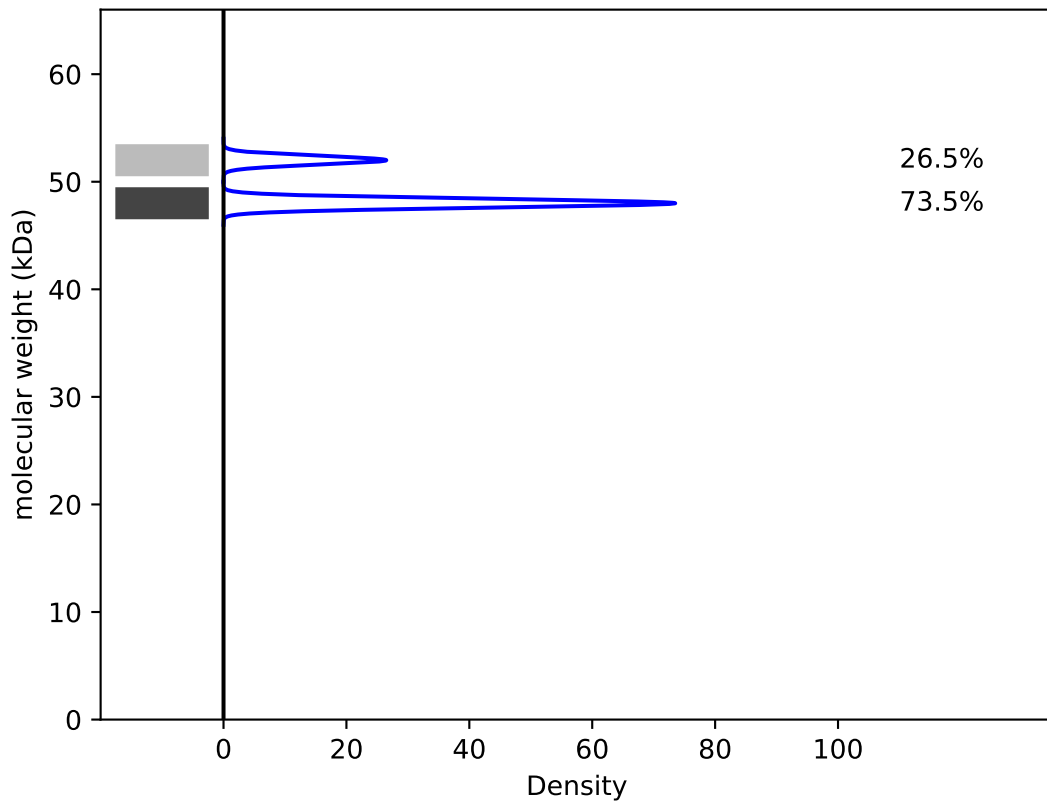

# P31323



# P13995

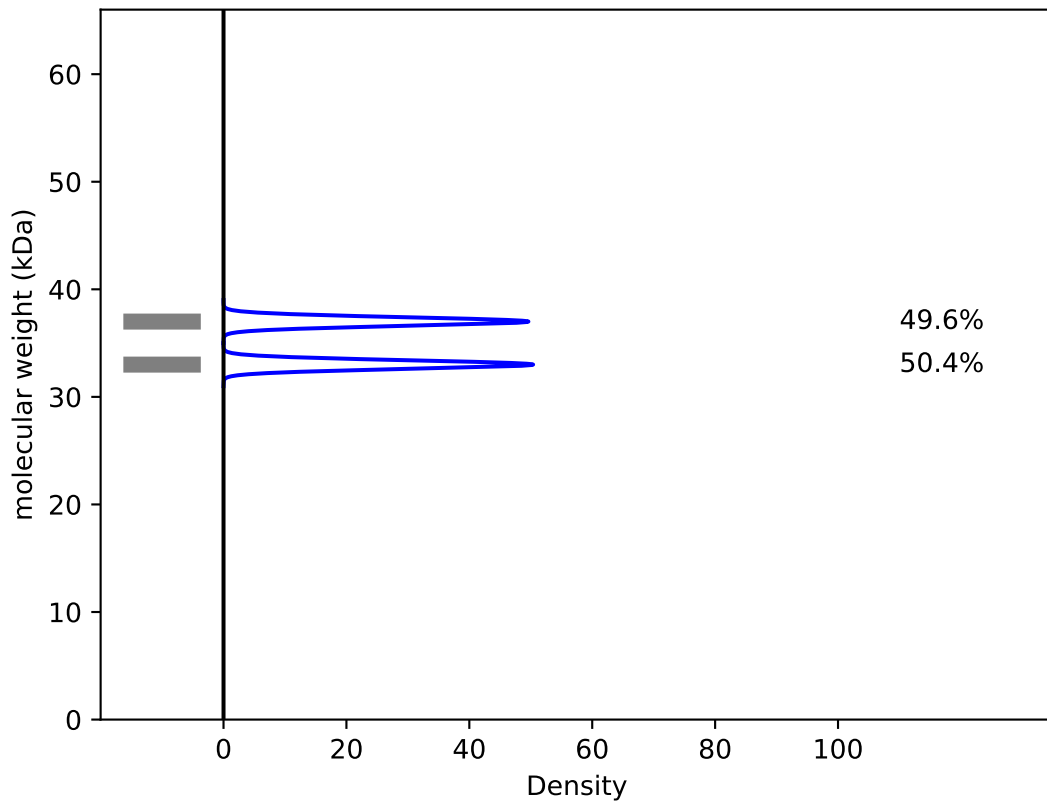

# P14550

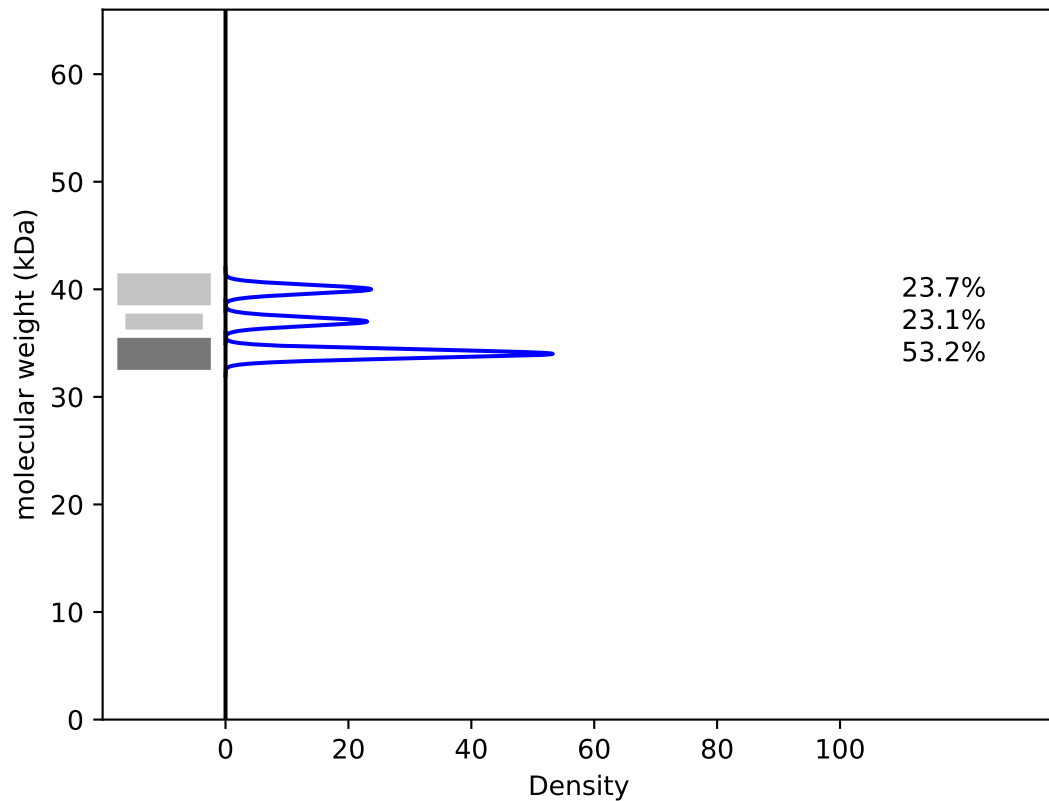

# P14618

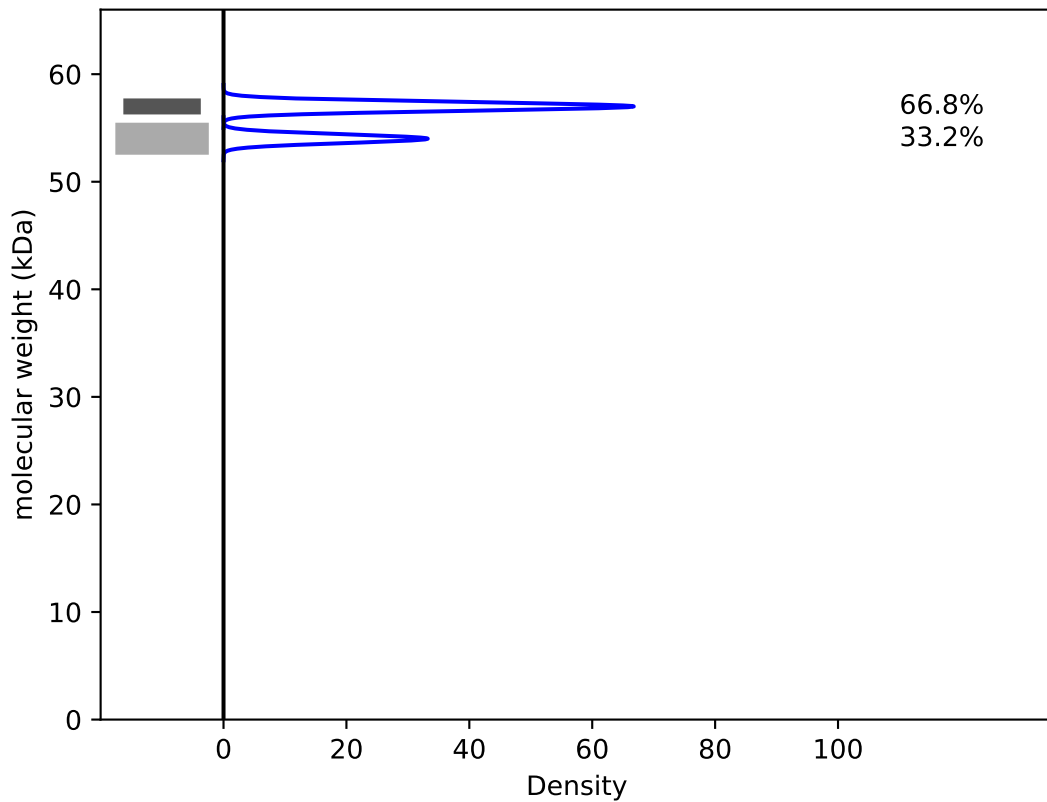

# P30613



# P63162





P14678



# P15121

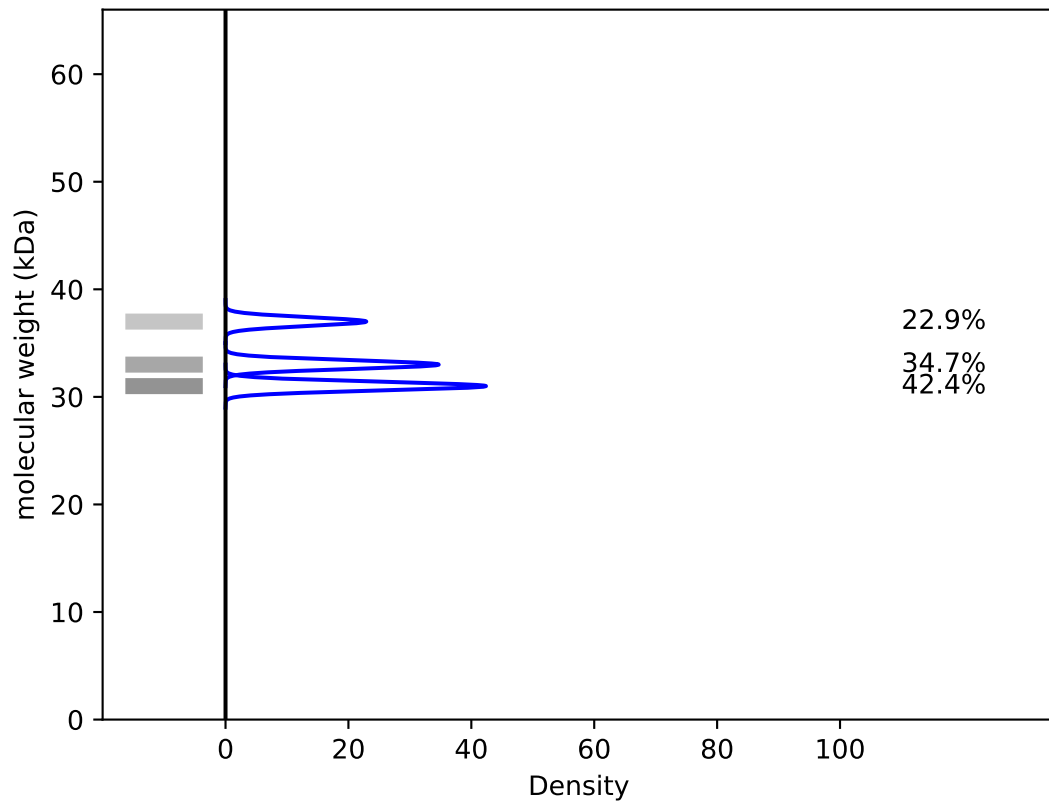

# C9JRZ8

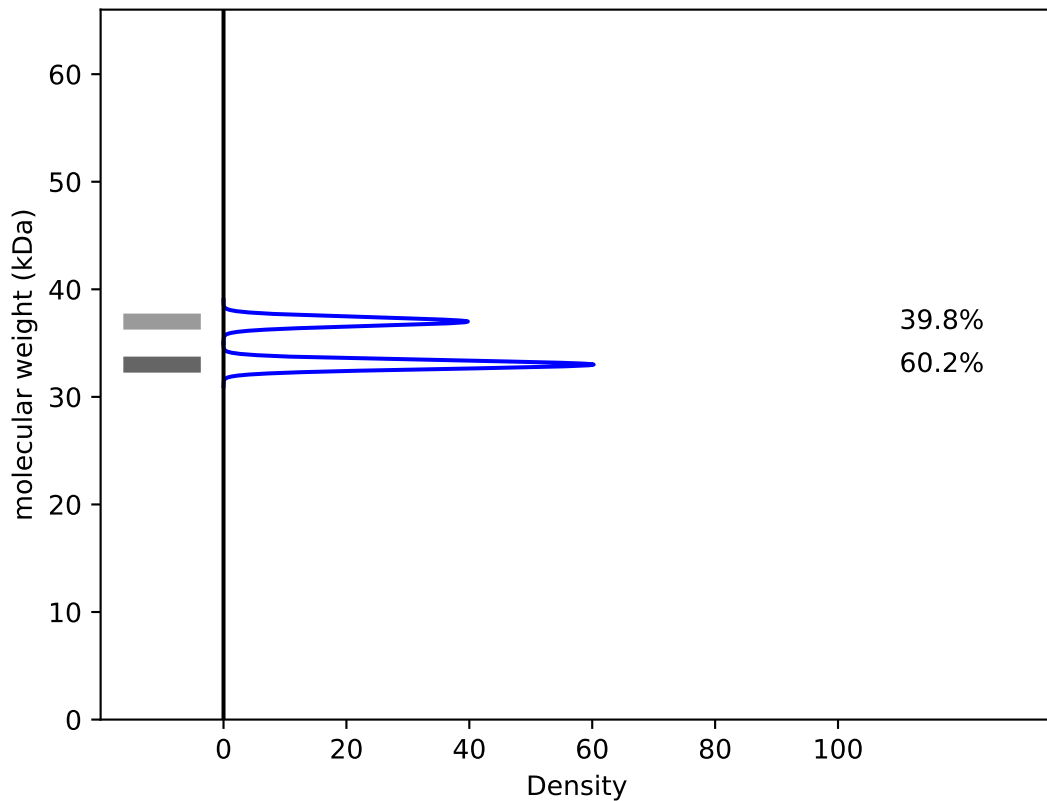

P15328



# P15374



# P15531



# P15559



# P15880

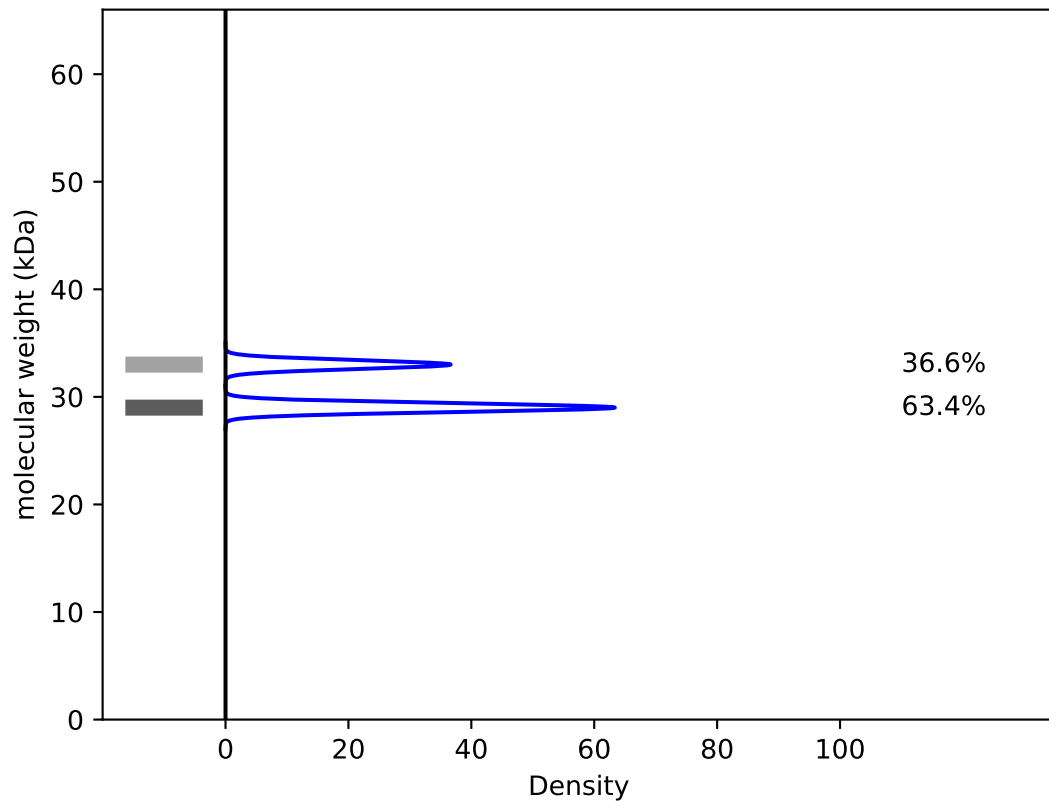



# P15927



# P16083

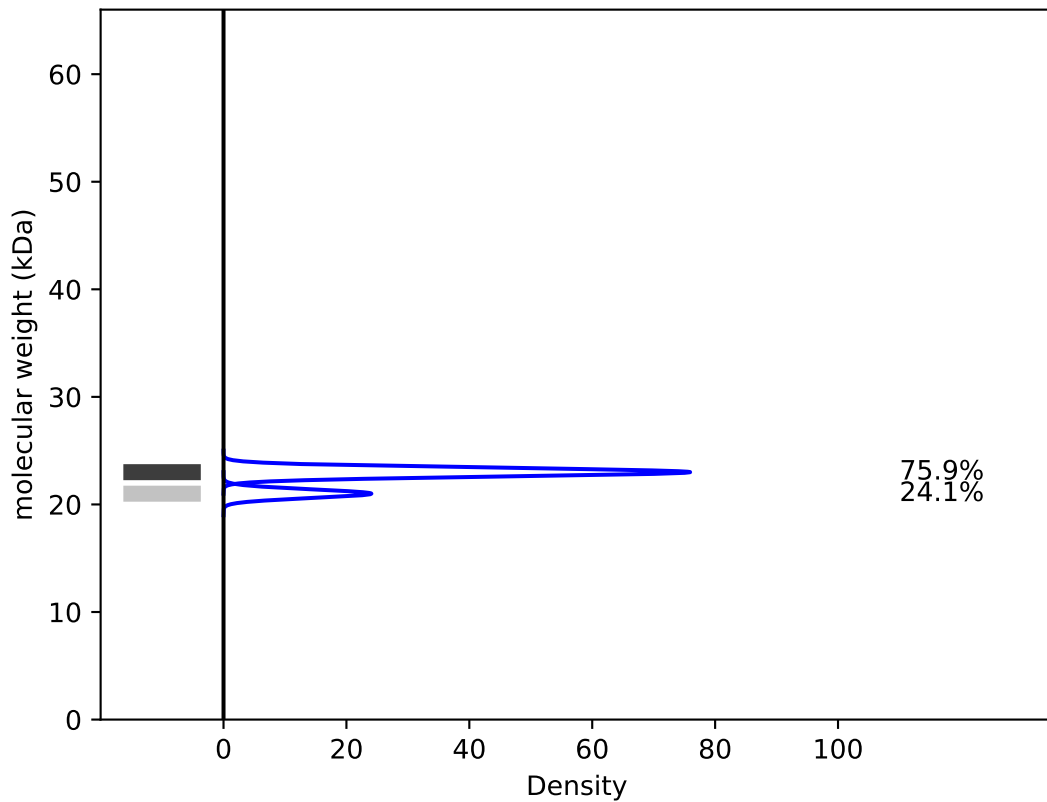

# P16152

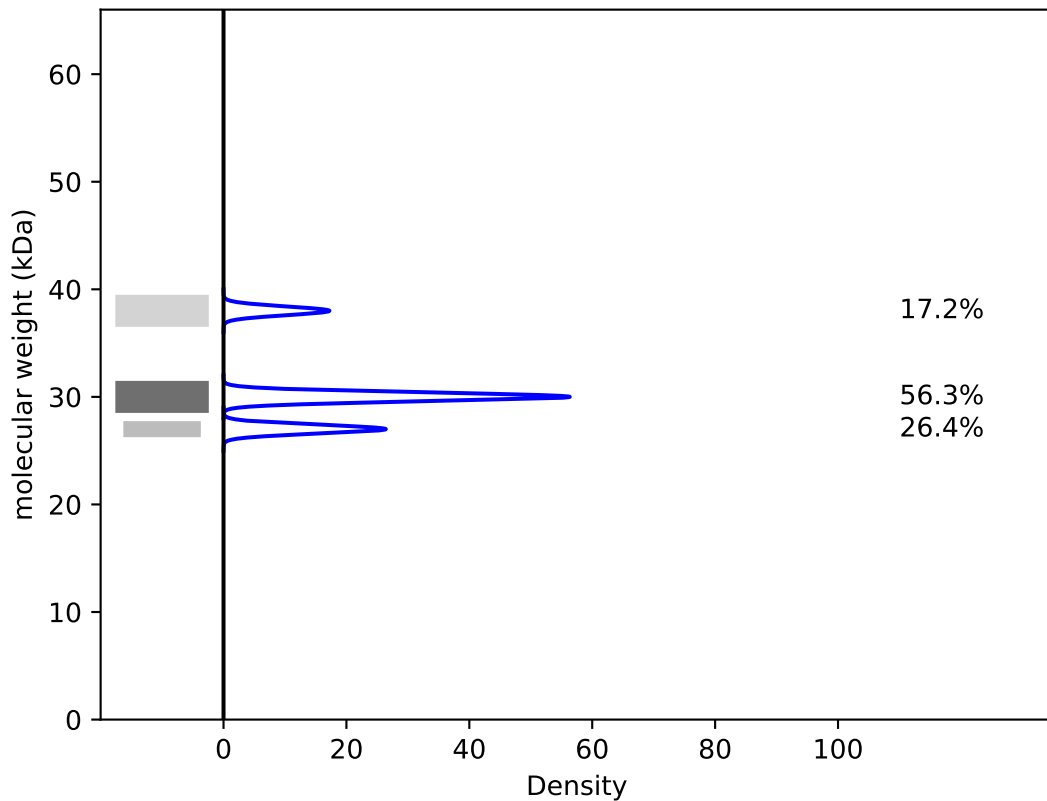

# P18846

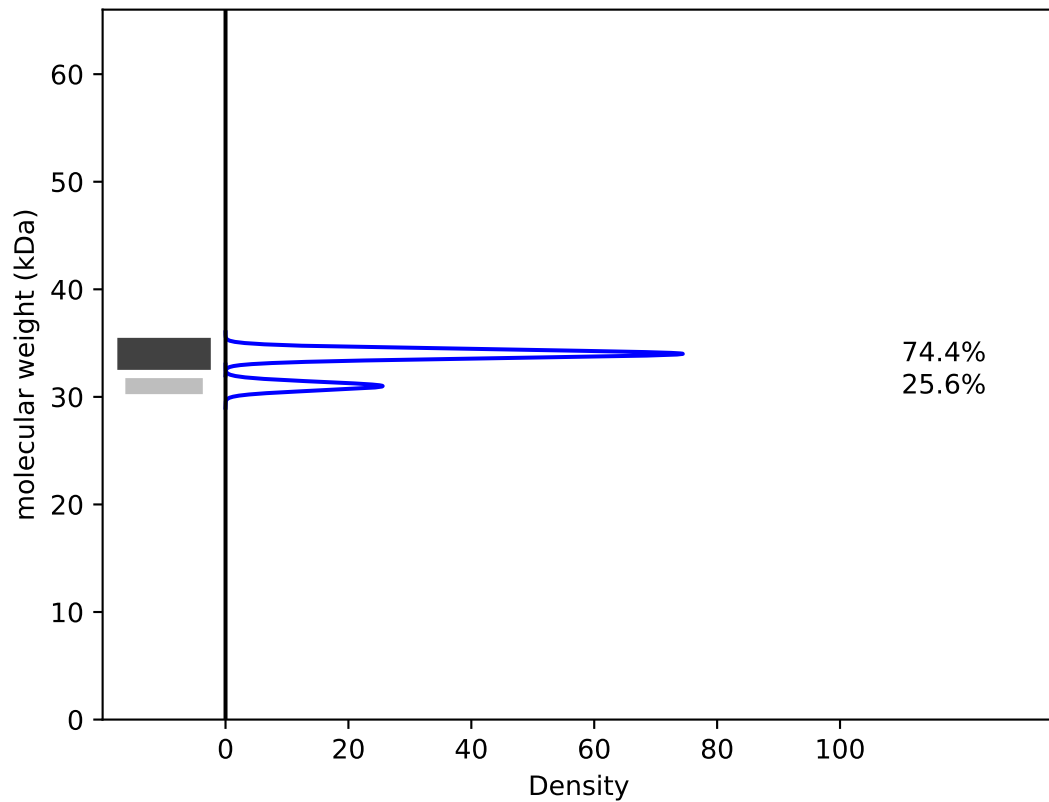

# P16220



# P16402



P22492



# P17612





# P22612



# P17931

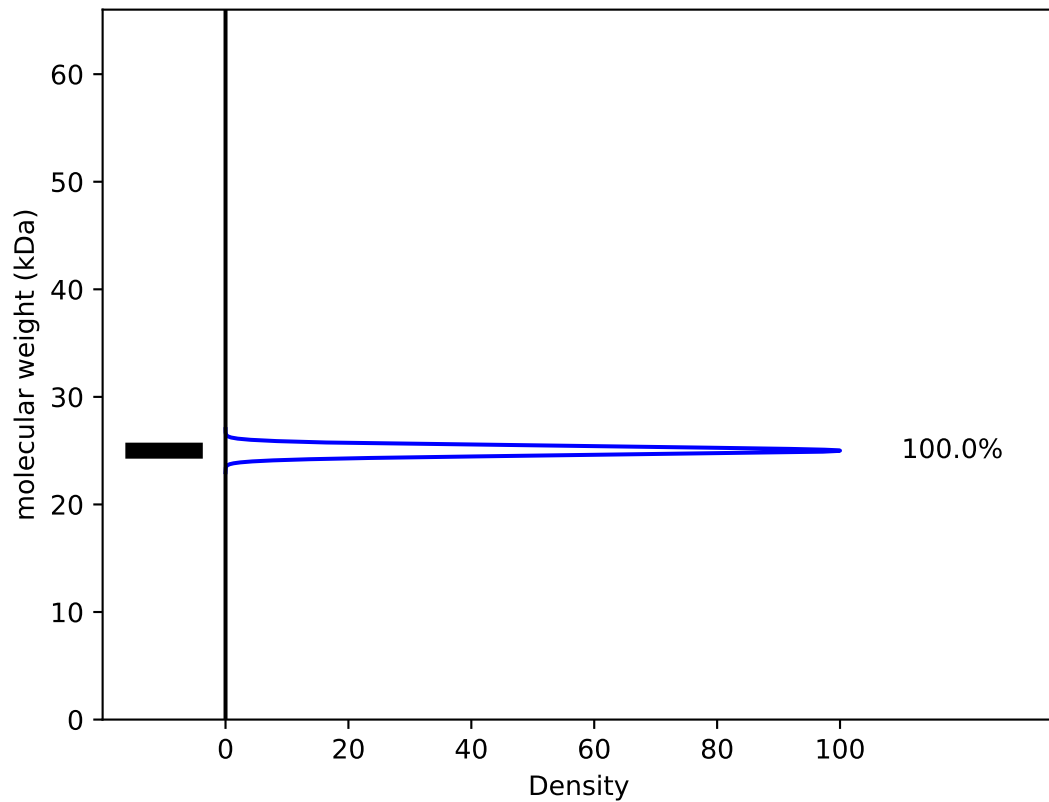

# P17980

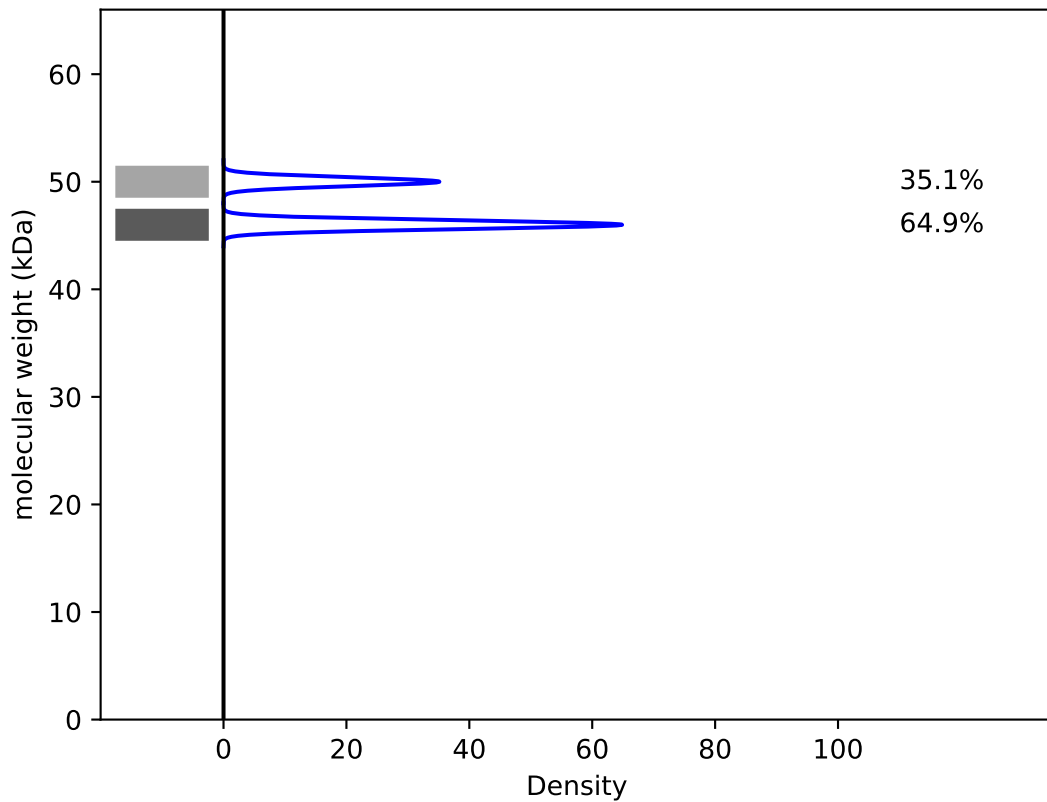

# P17987



# P18031

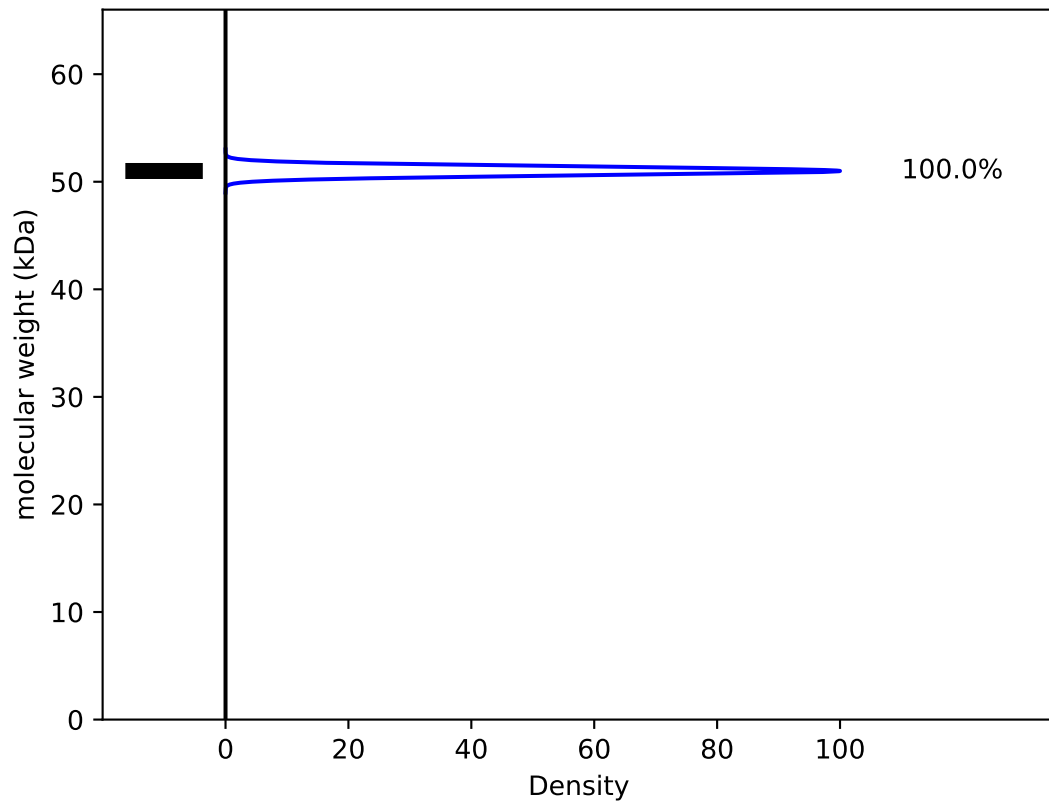

# P18085

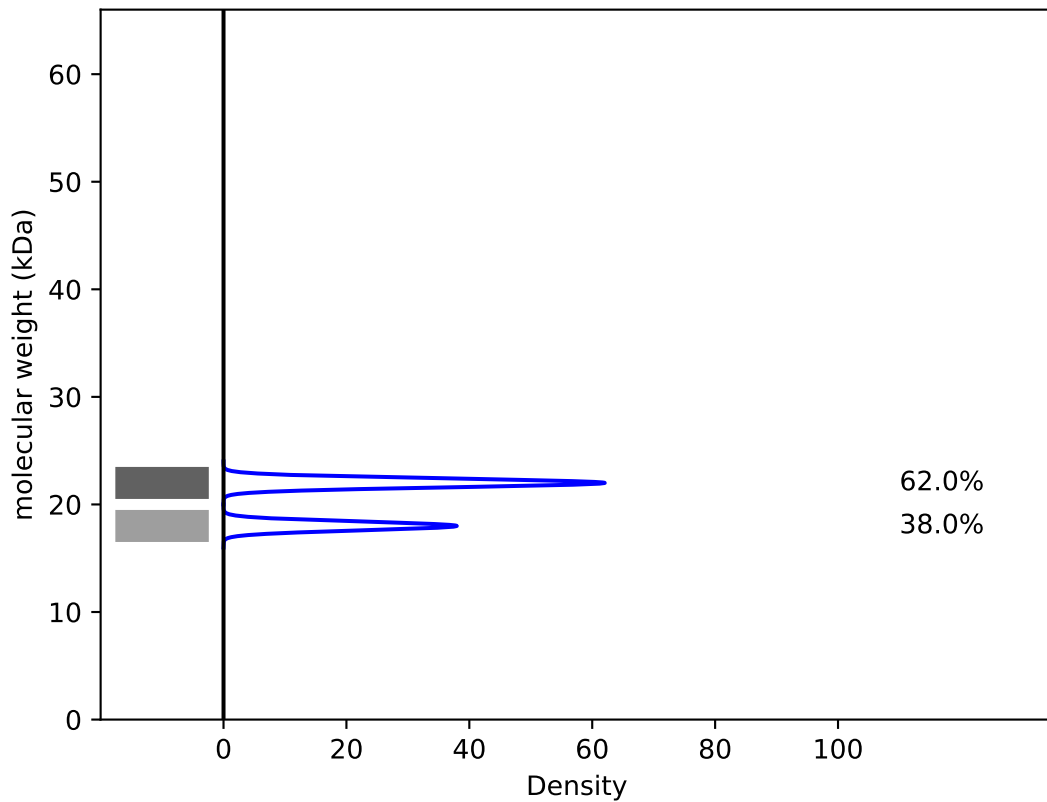

P18124



# P18621

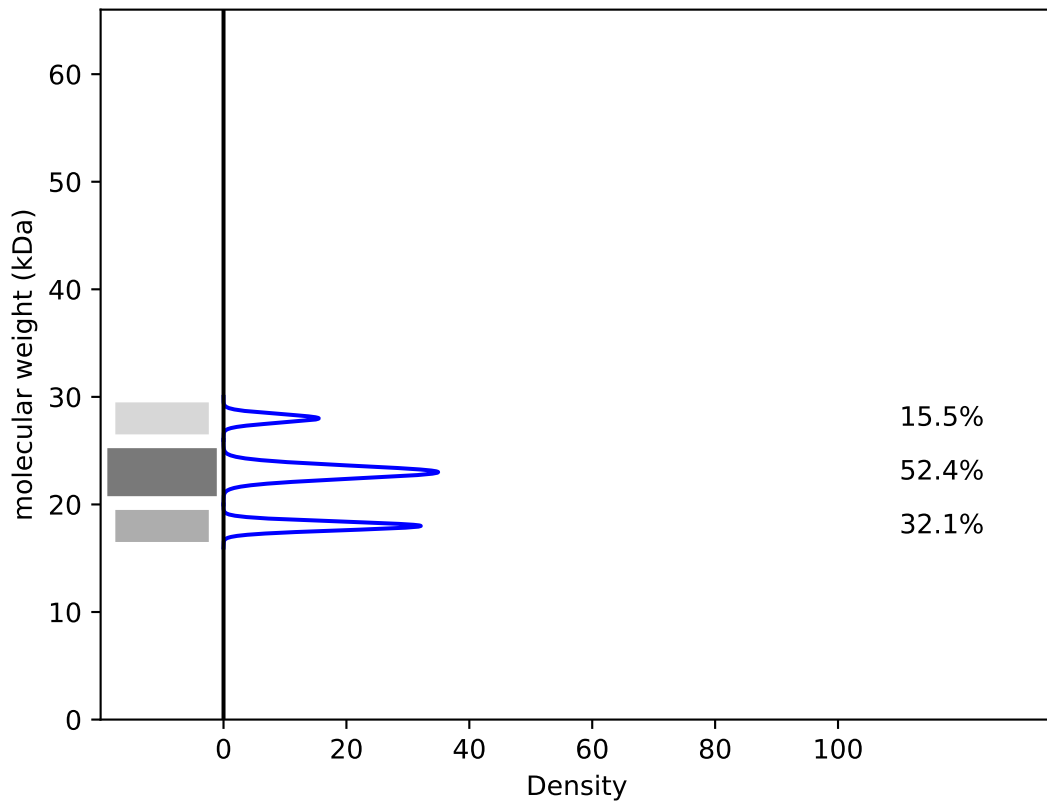



# P18669



Q8N0Y7



# P15259



# P18754



# P19387



# P19388



# P19404



# P19623

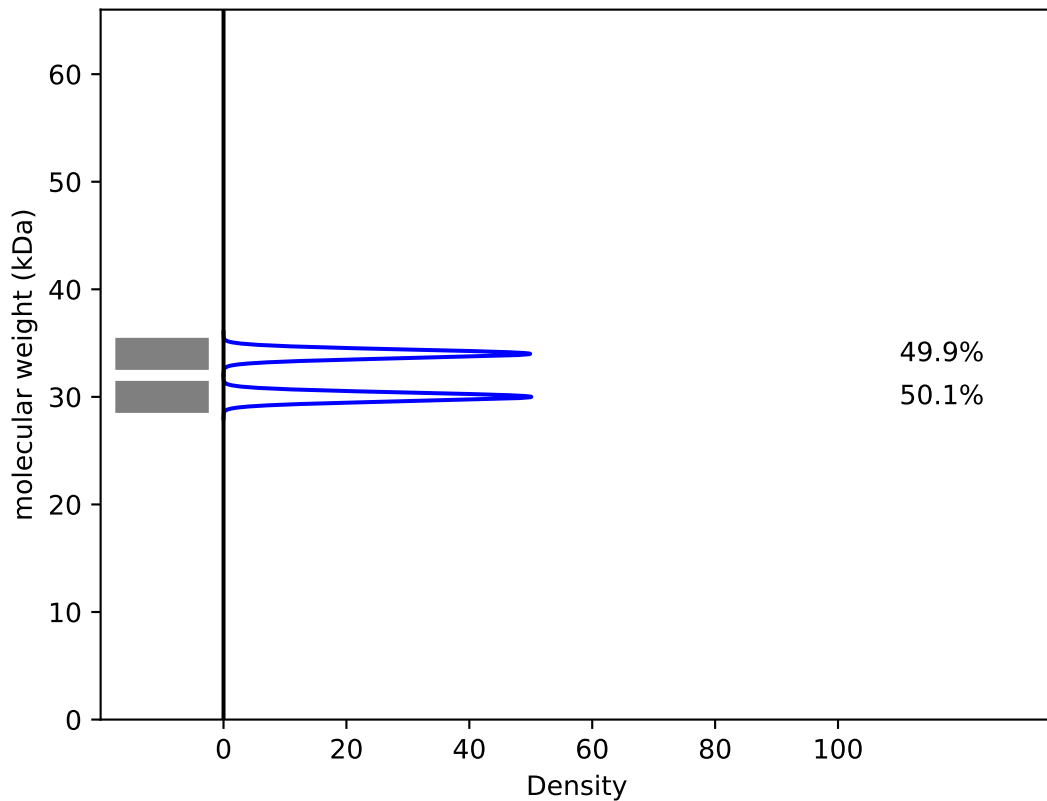



# P19784



P19971

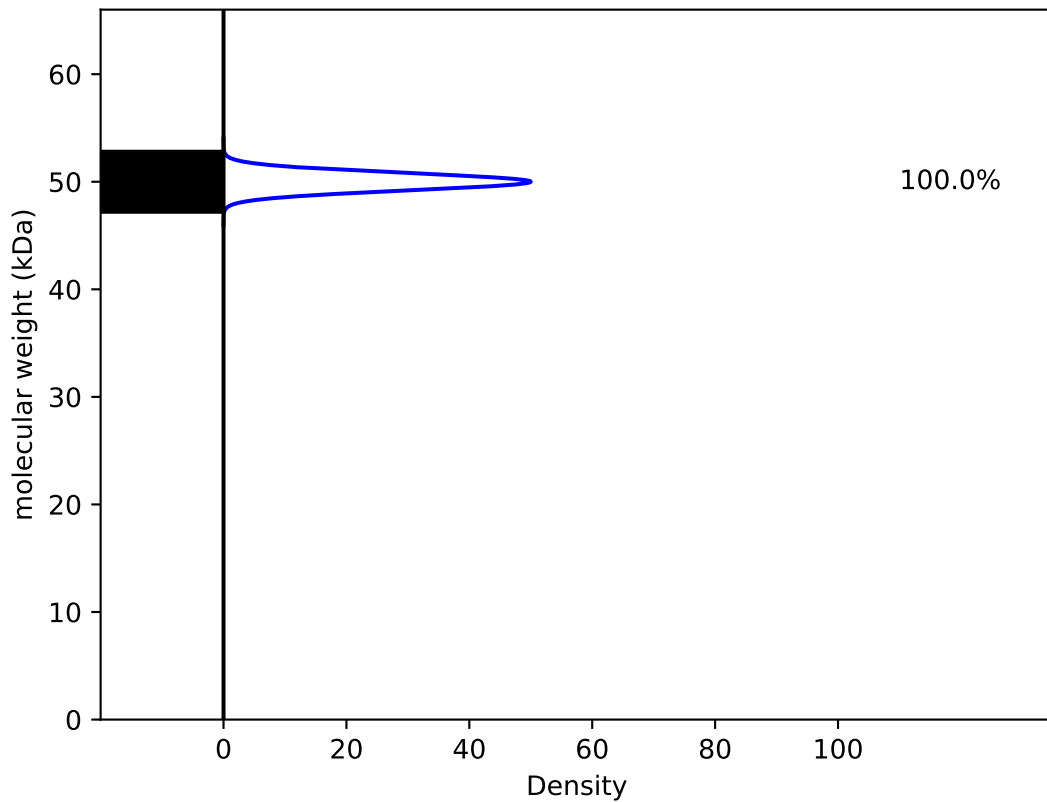

# P20290



# P20339



# P20340



# Q9NRW1



# P20618



# P21266





# P21283



# P21291



# P21796



# P21912



# P21926



# P21964



# P22061

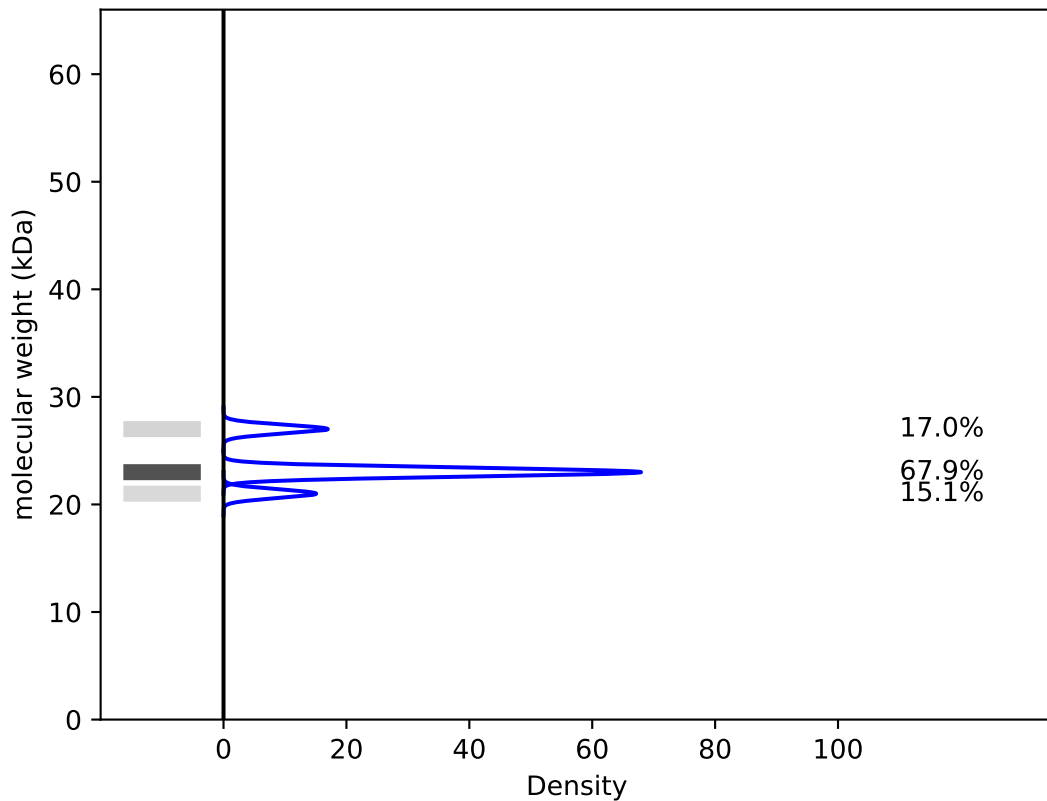

# P22087

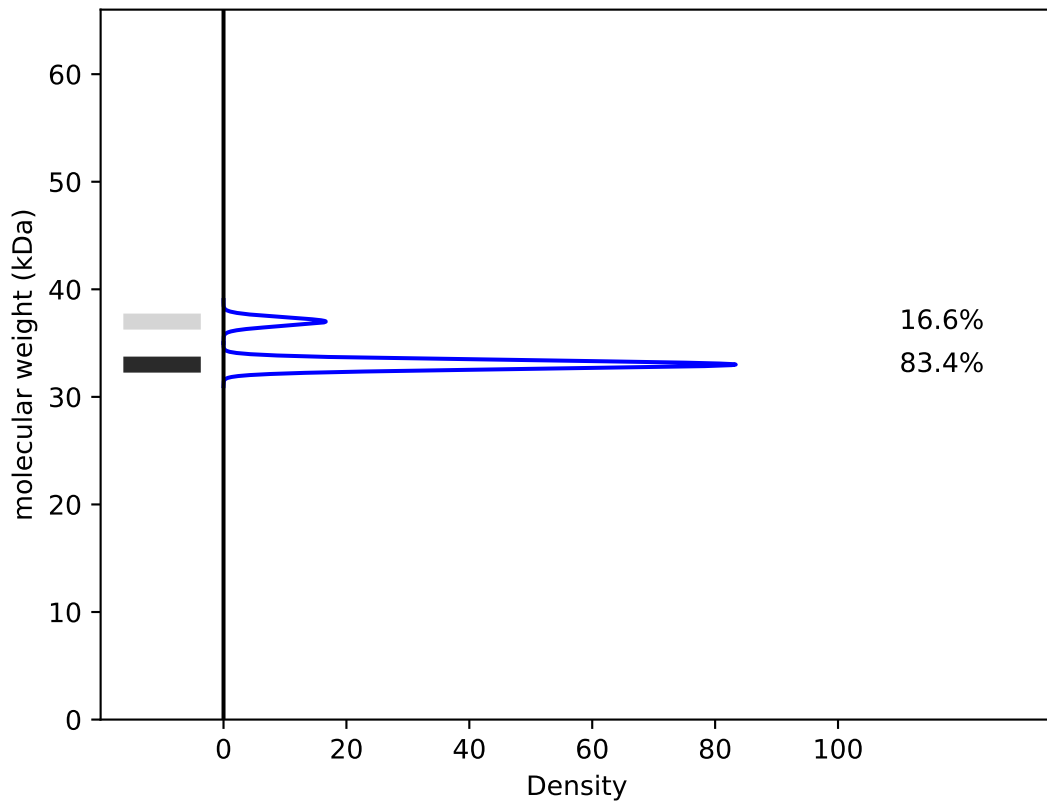



P22234

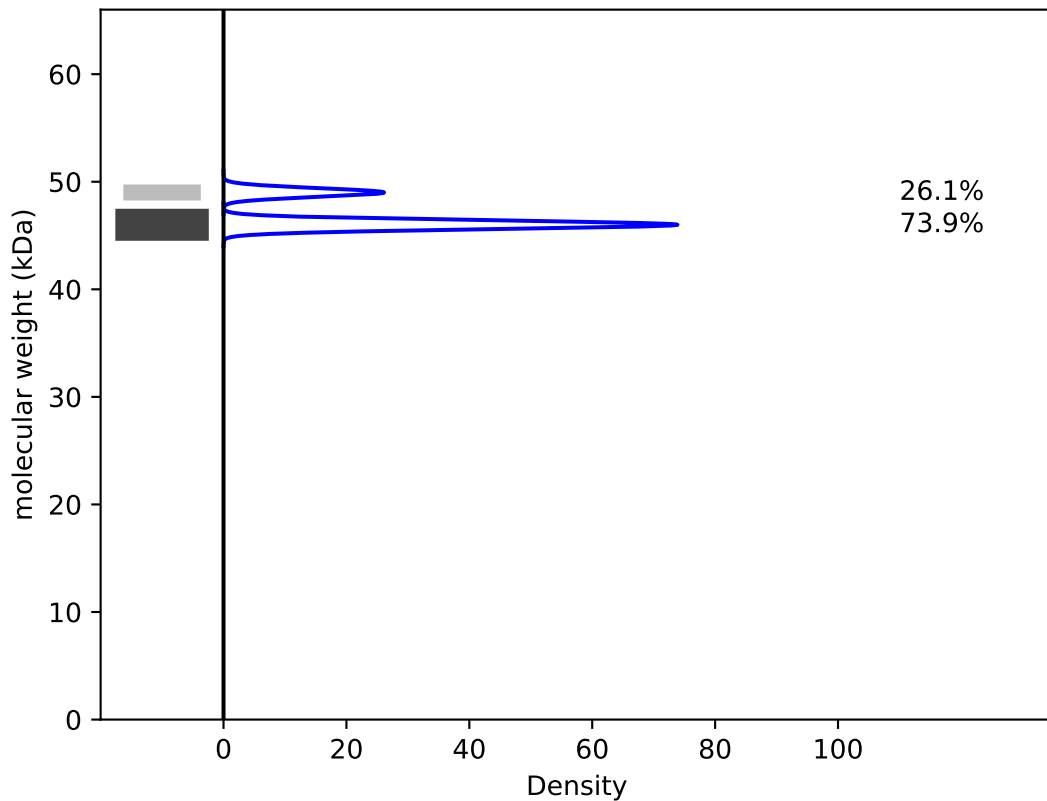

P22392



O60361



P22626



P22694

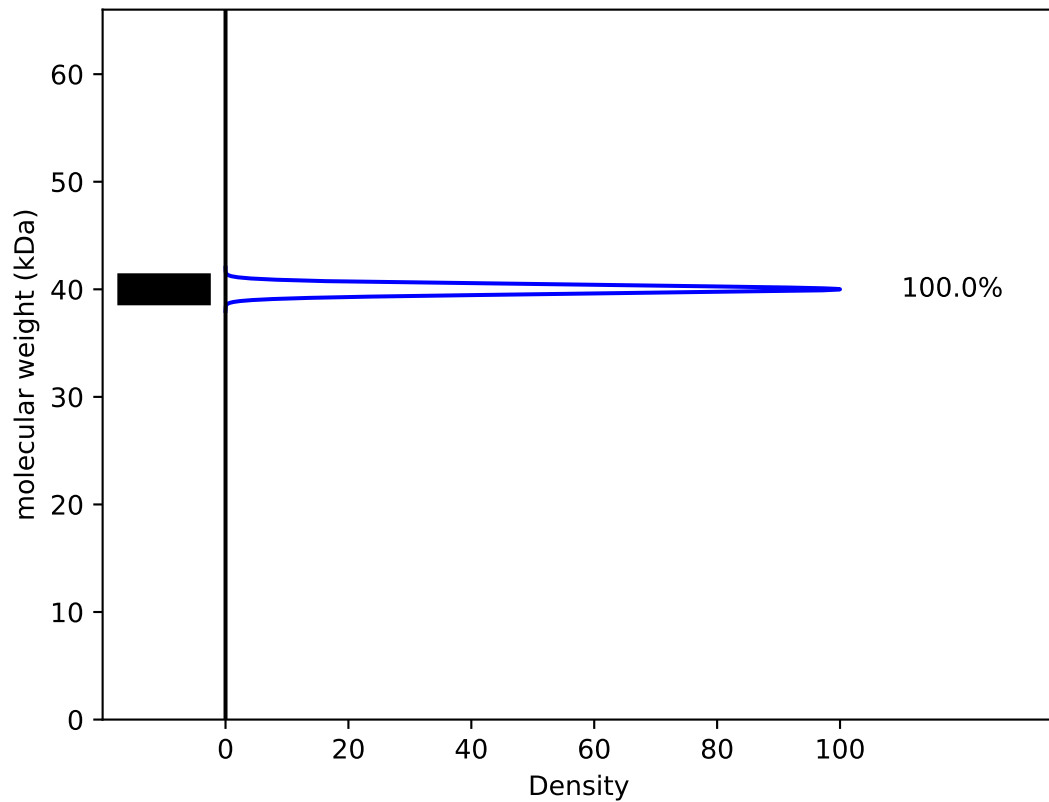

P22695

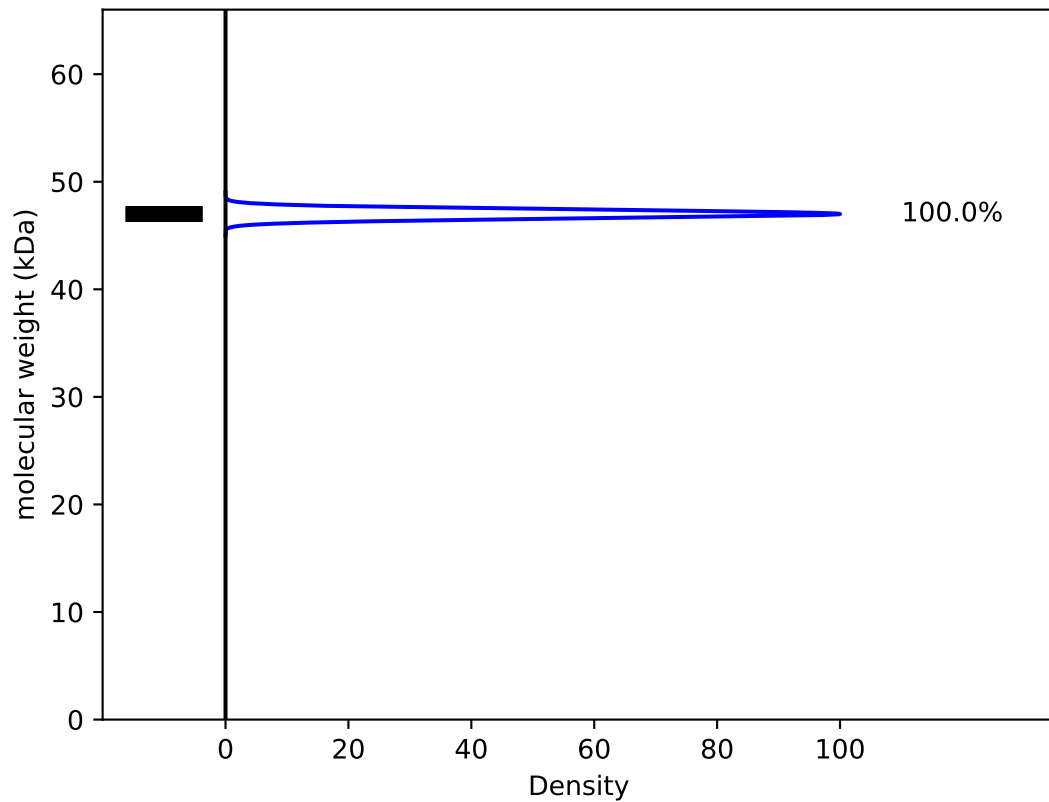

# P23193

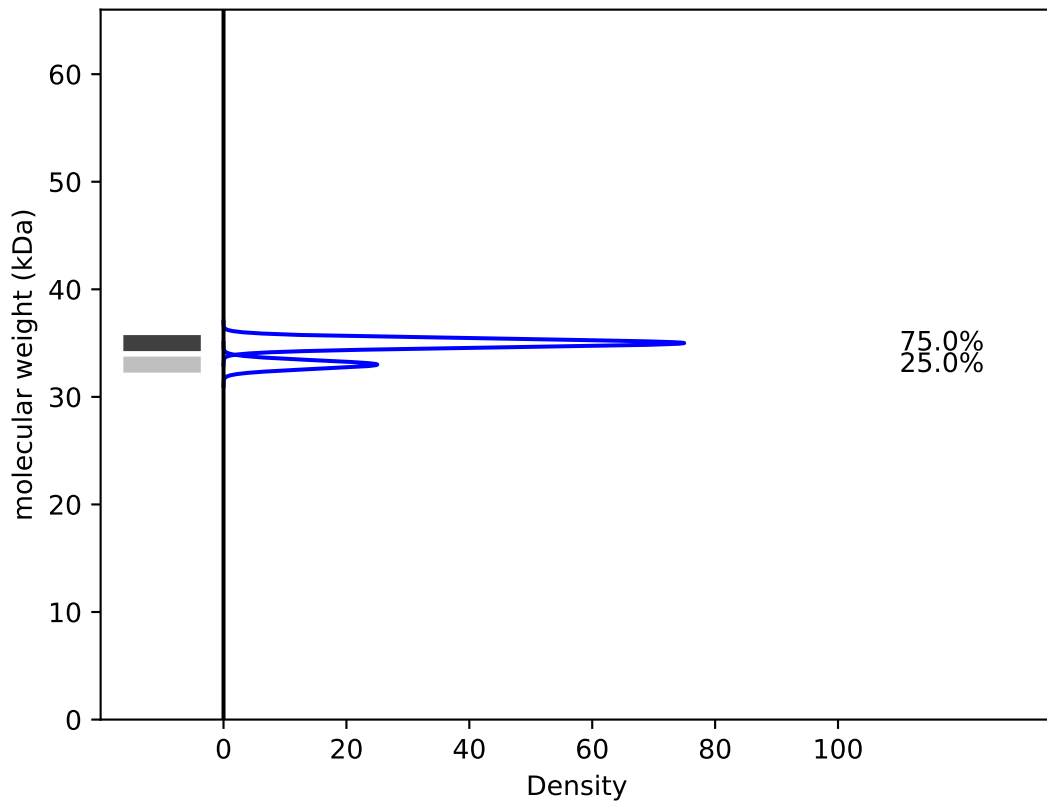

P23284





P23381



P23396

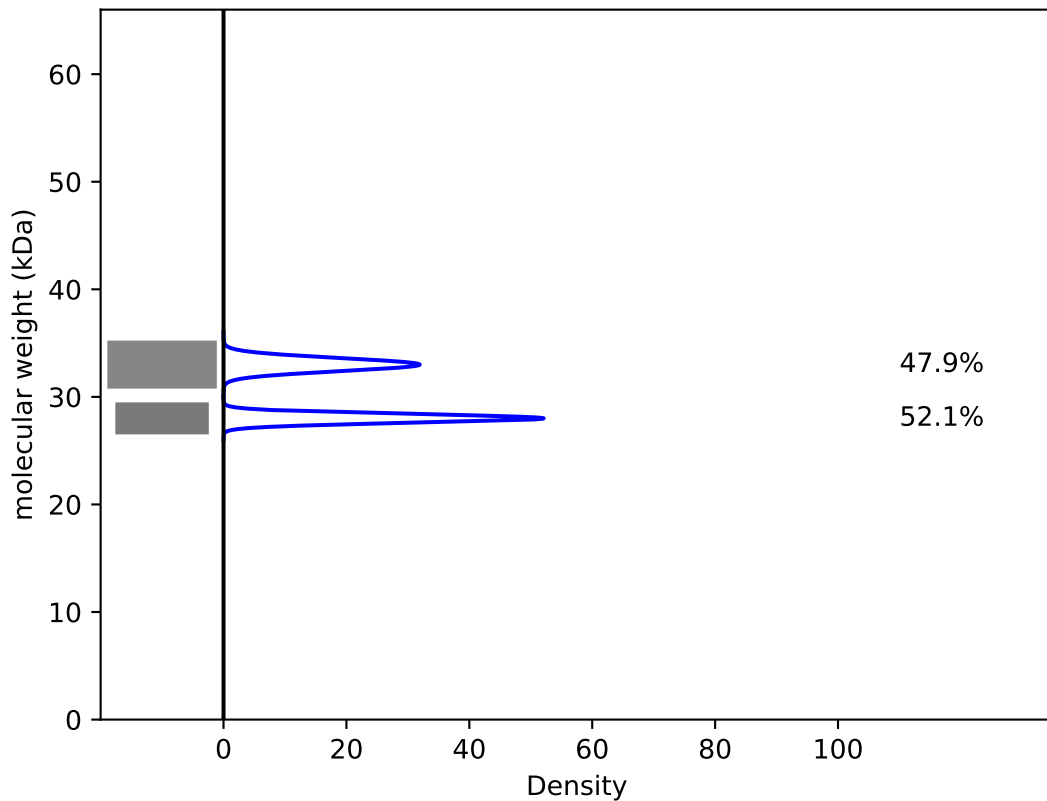

P23528



# P23919



P24534



P24752



# P25398

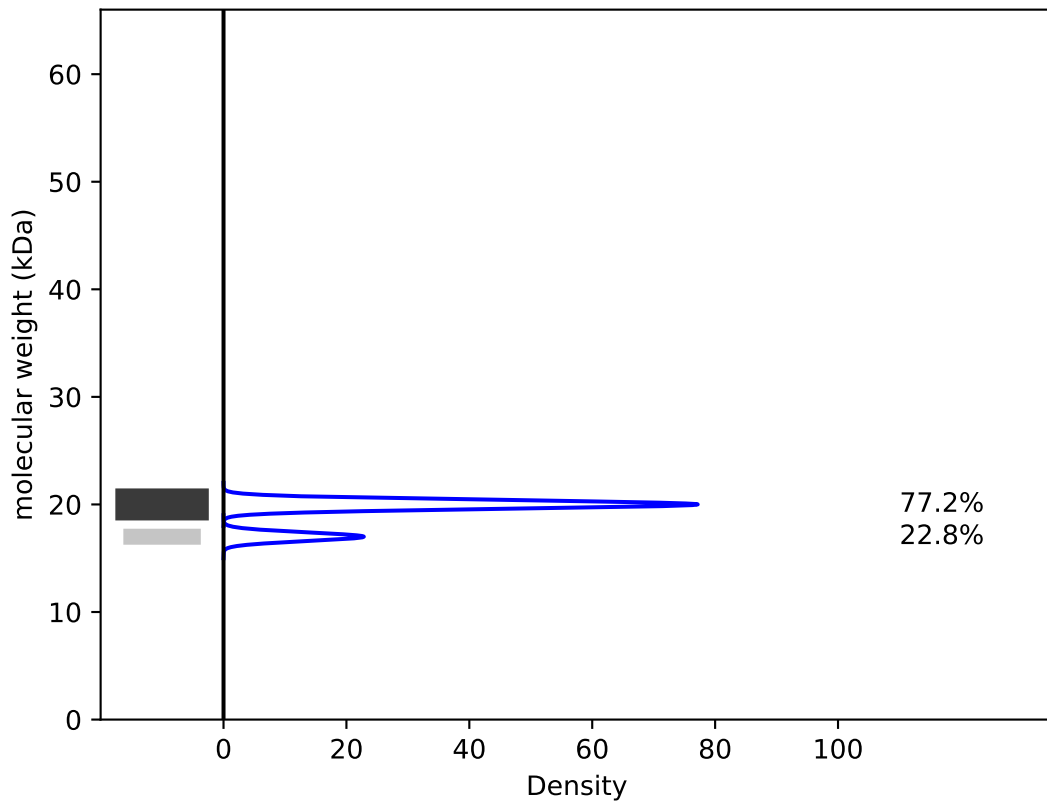

# P25685

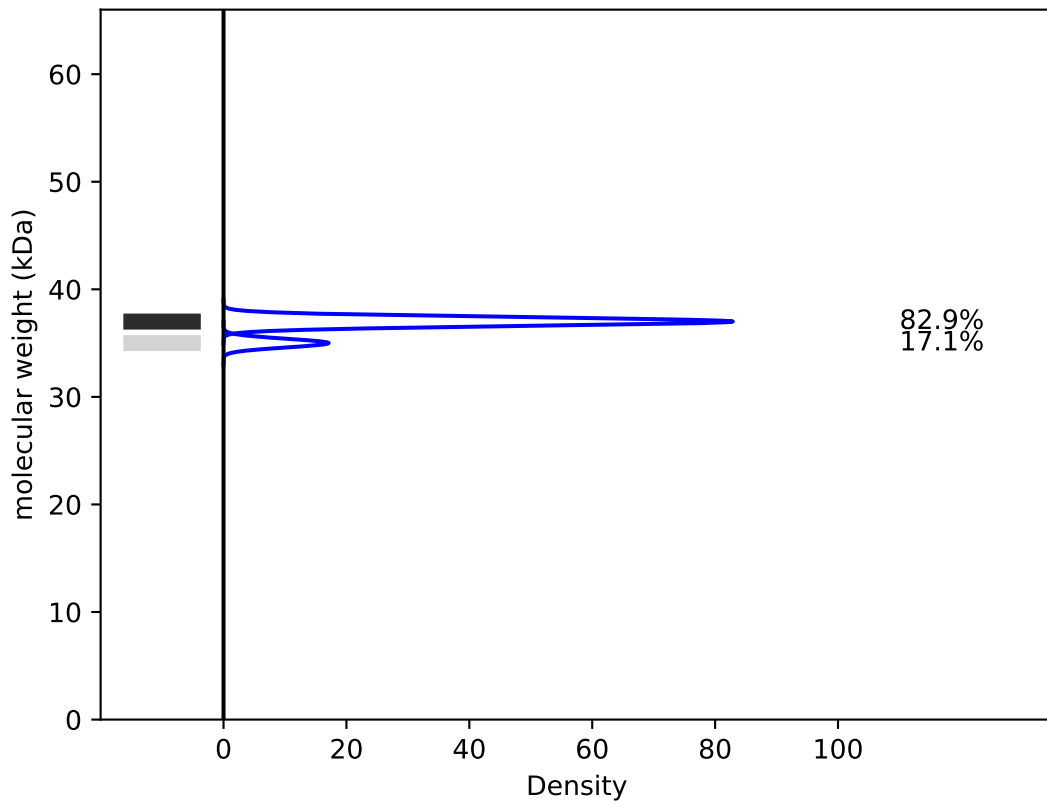



P25786



P25787



# P25788



P25789



# P26196



# P26368

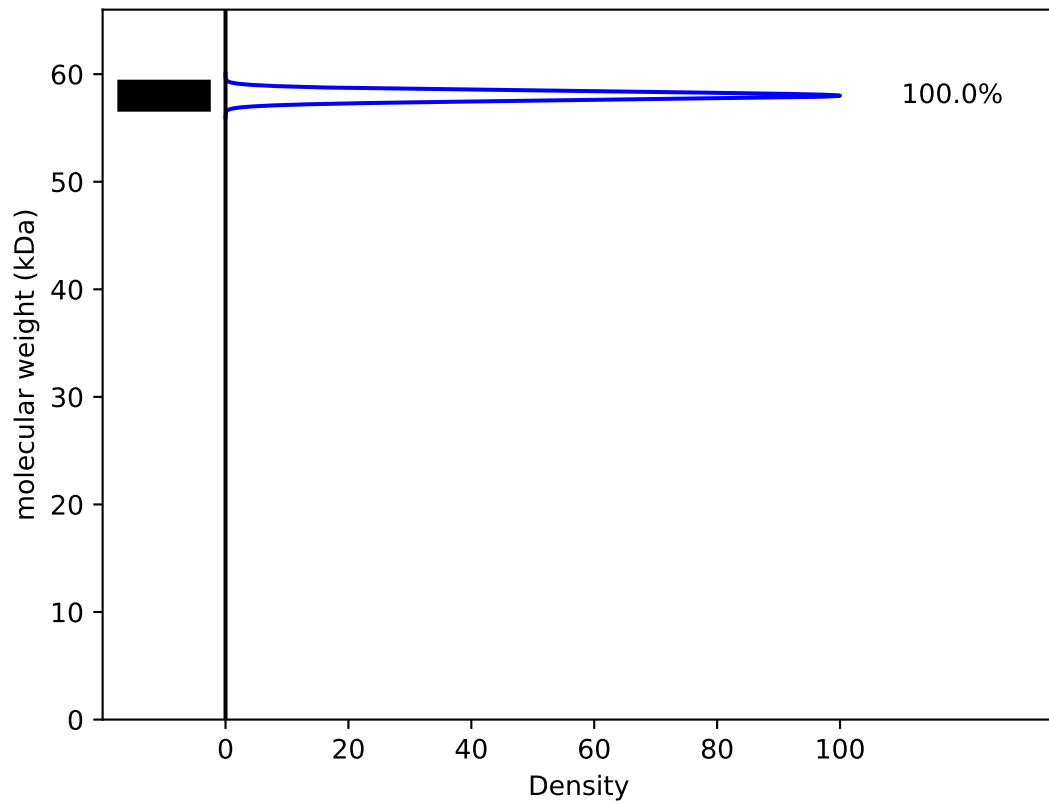

# P26373

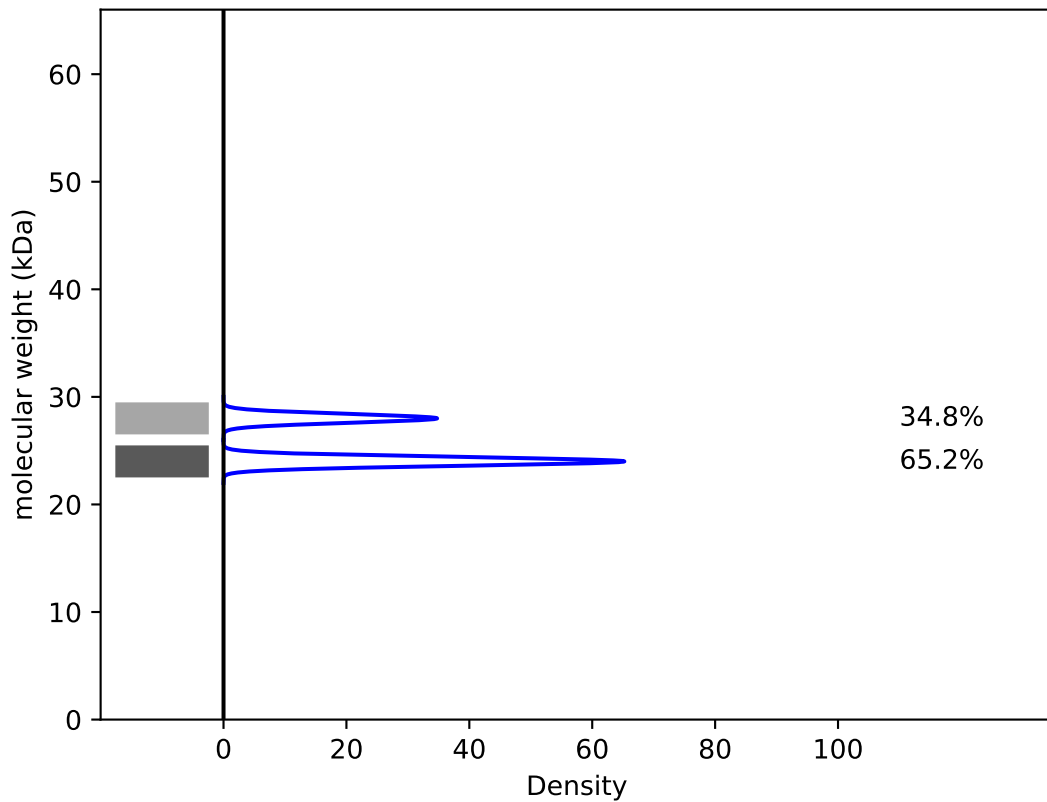

P26583





# P26641

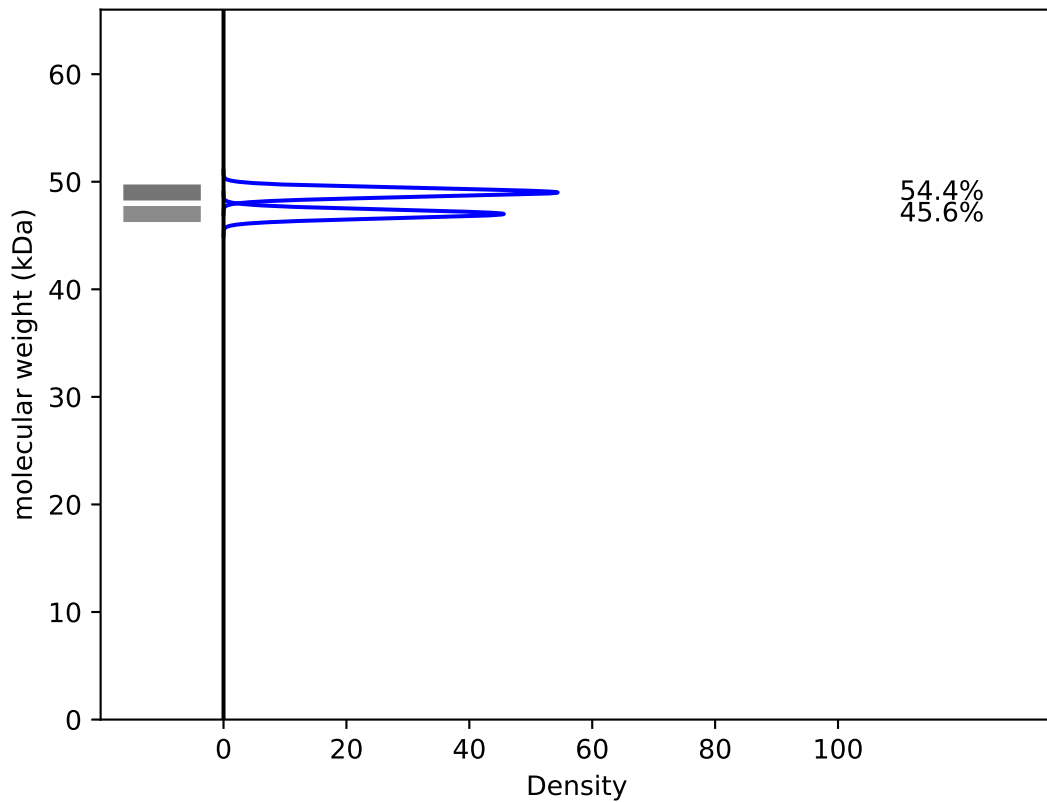

P27105



P27348

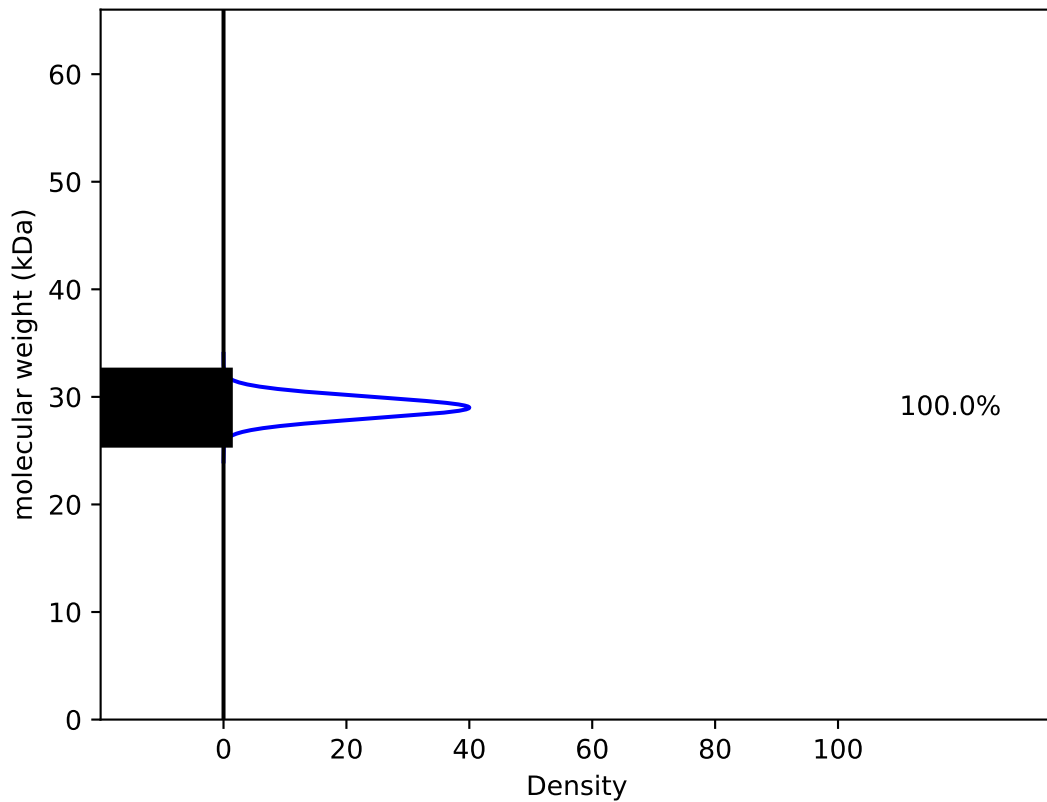

# P27635

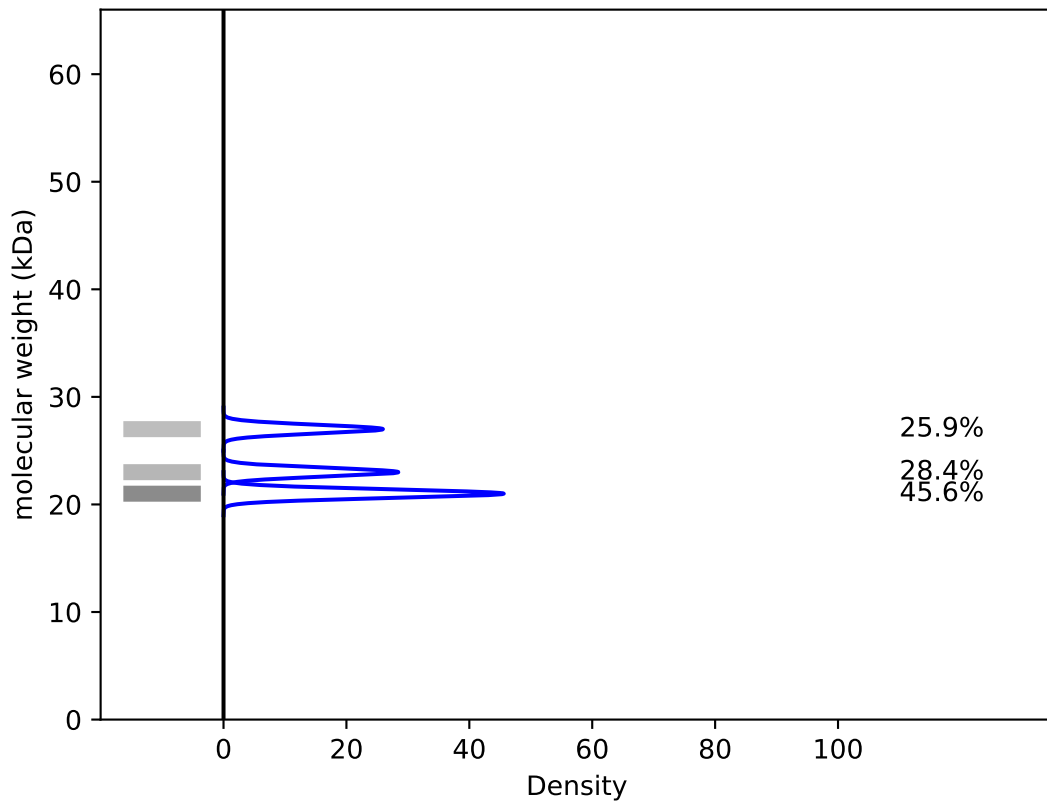

# Q96L21



P27695



P27797

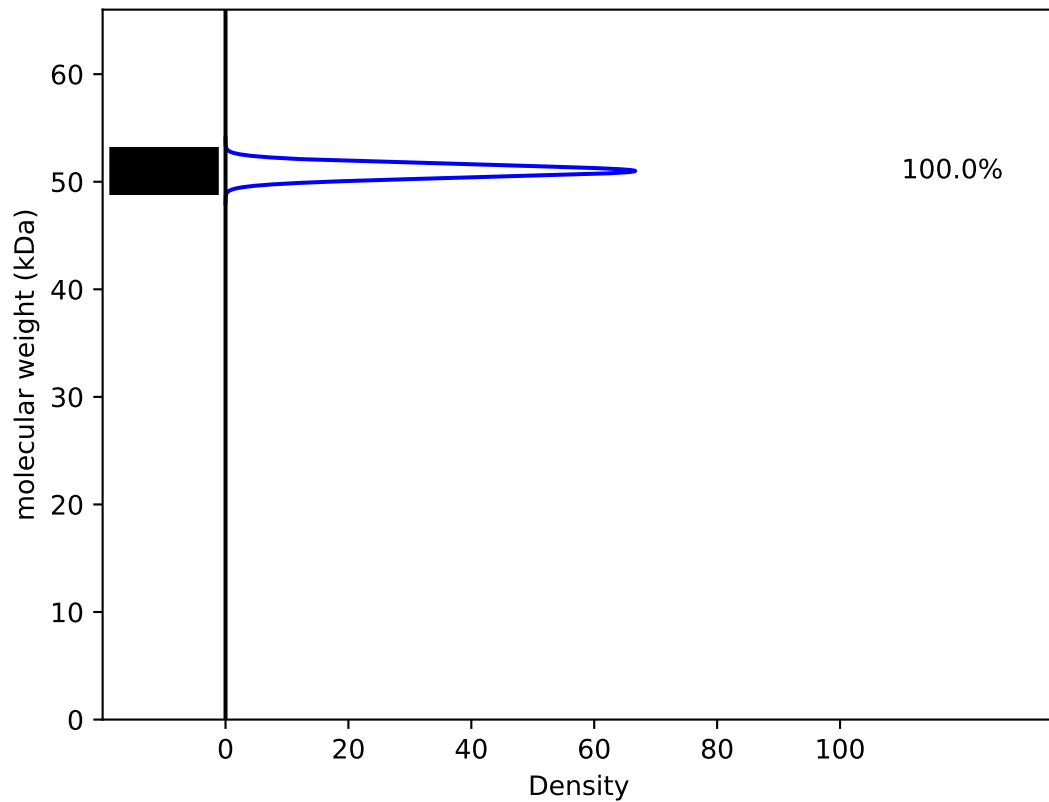

# P28065





# P28066

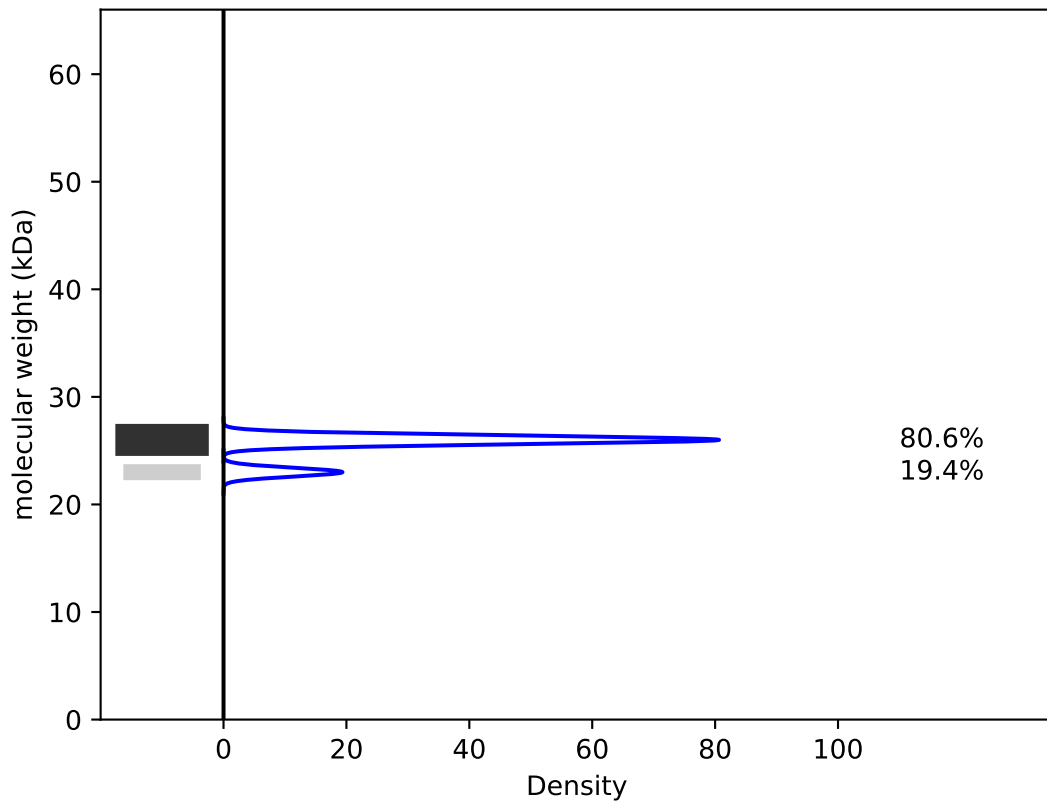

P28072



P28482



P29692

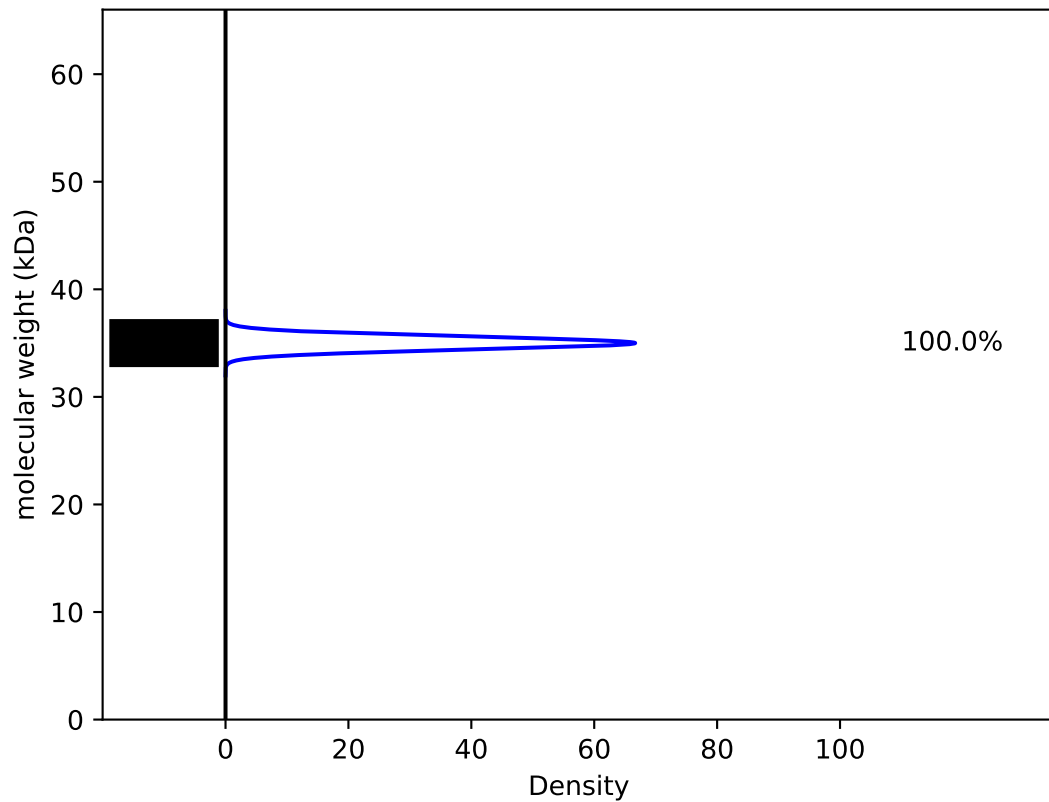

# P30040



P30041



# P30043

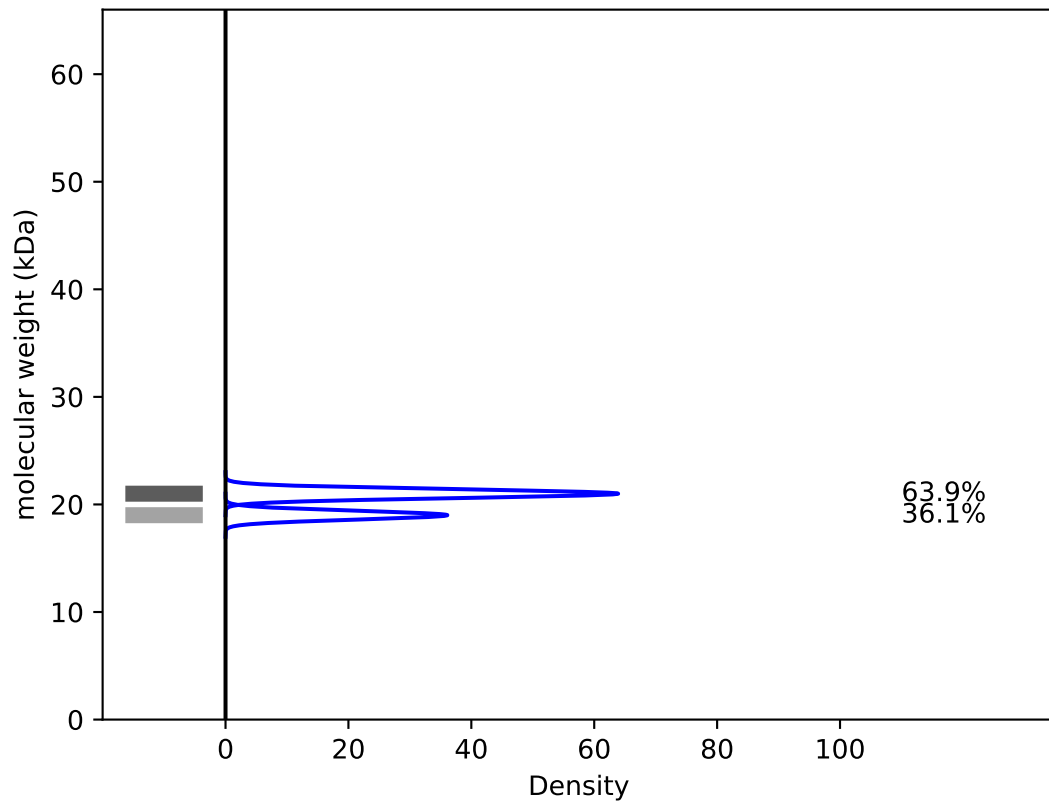

P30044





P30050



P30084



P30085



# P30086

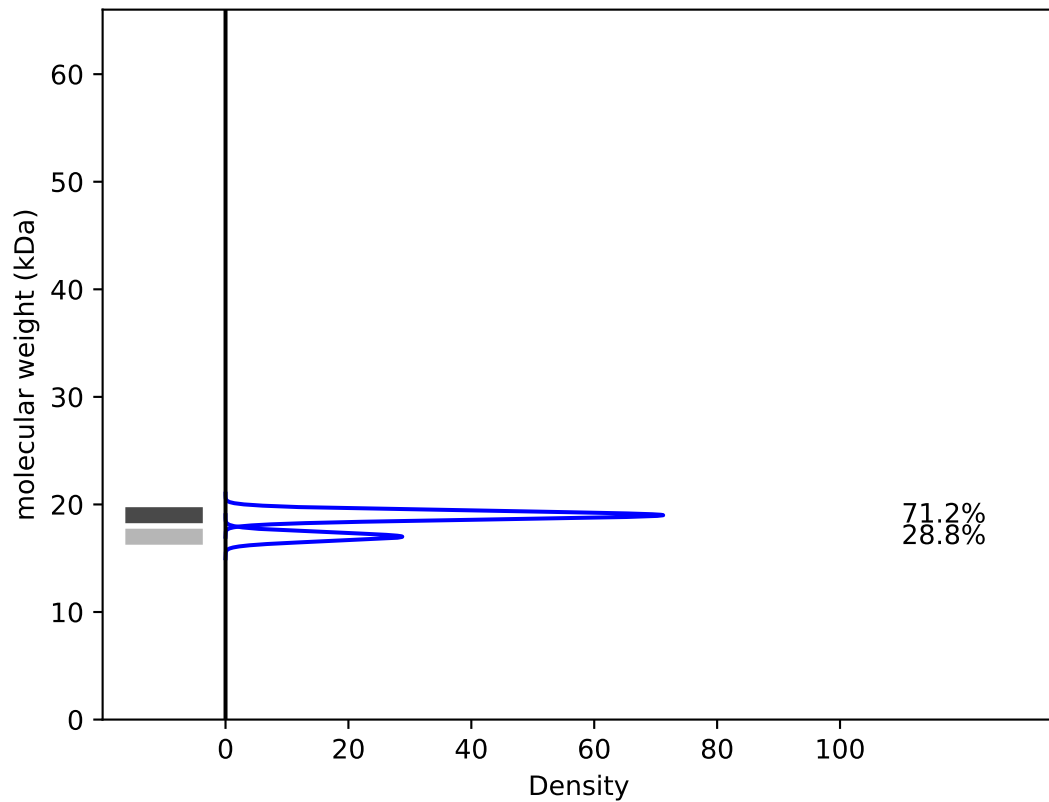

P30405



# P30419



# O60551



P30453





P30457



# P30450



# P18462



# P30456

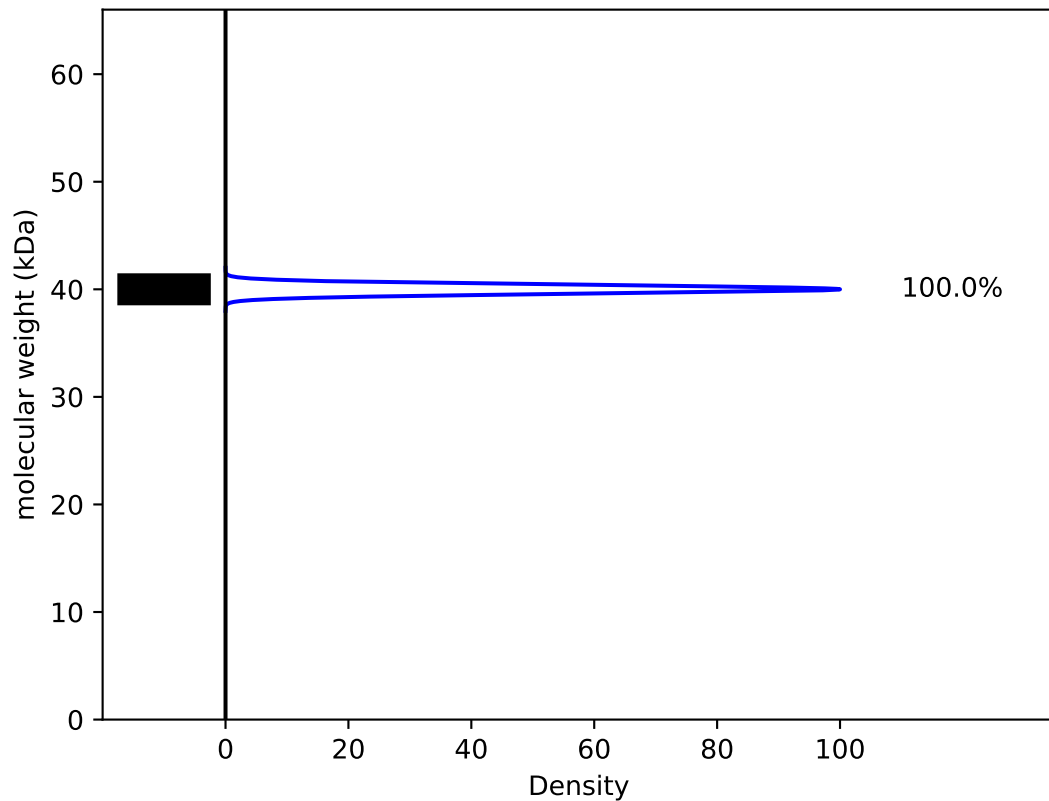

Q29940



P30493



P30492



# P30508





# P30510



# Q07000



P30504



Q29960



# P30505



# Q9TNN7



P30501



Q95604





# P30519

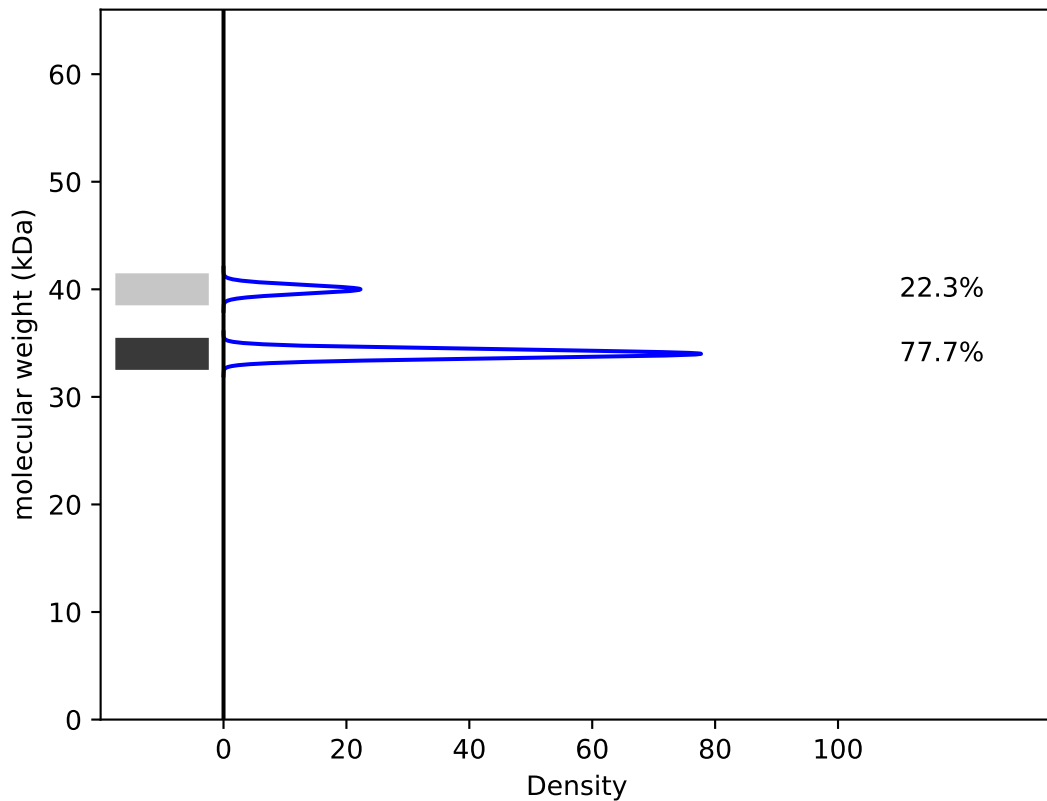

# P30520

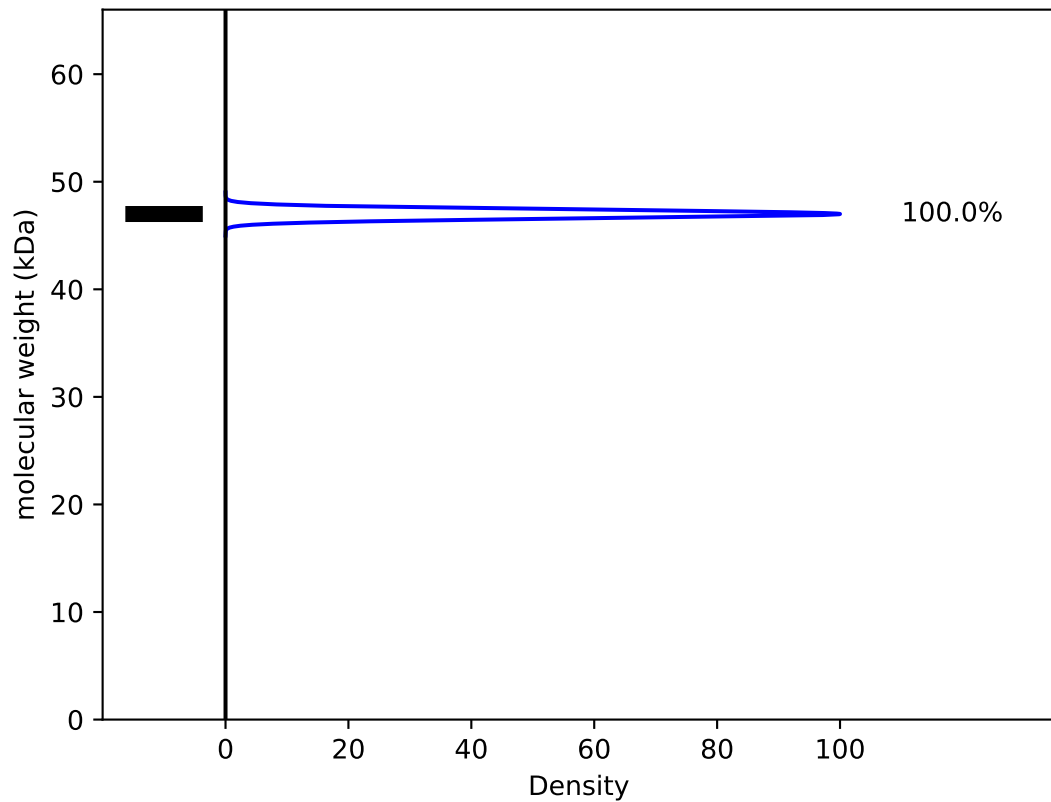

P30533



# P30536

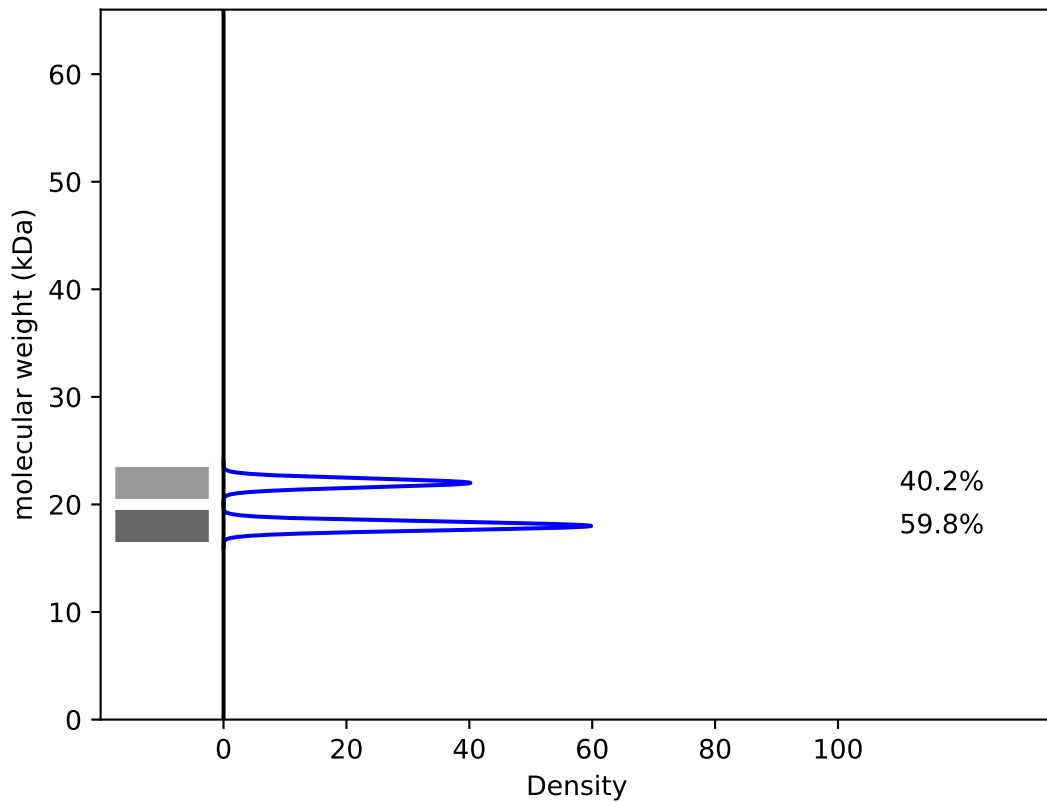

# P30566



P30626



# P30740

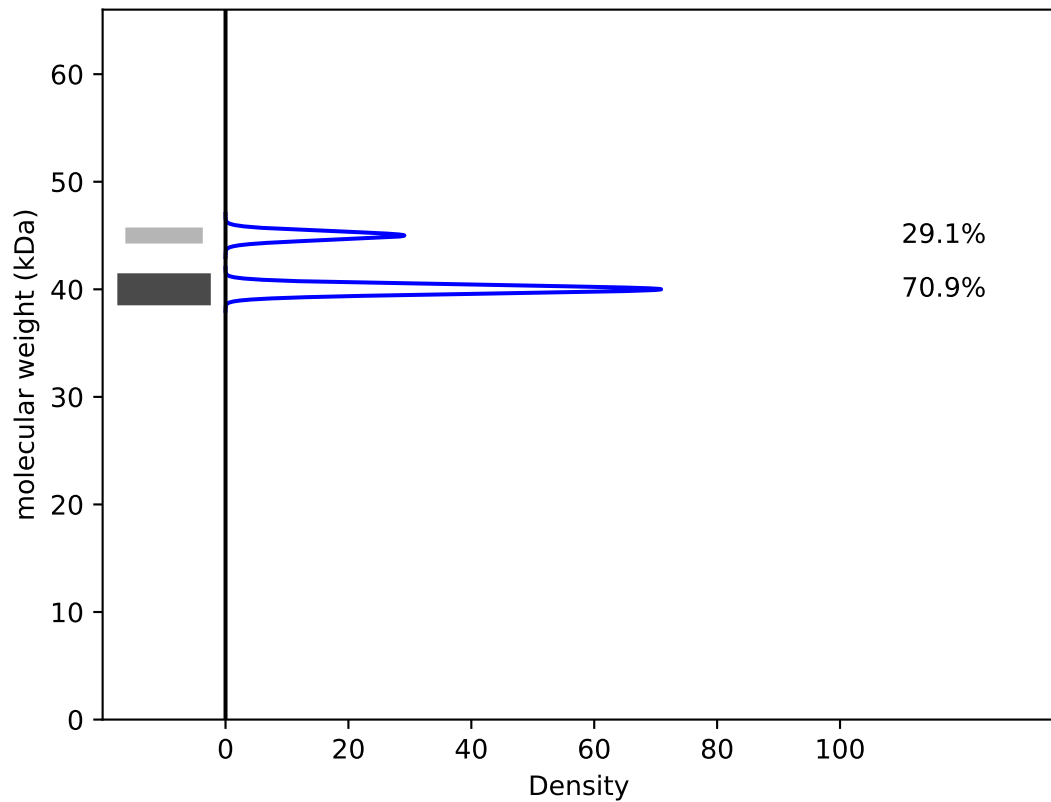

# P50453

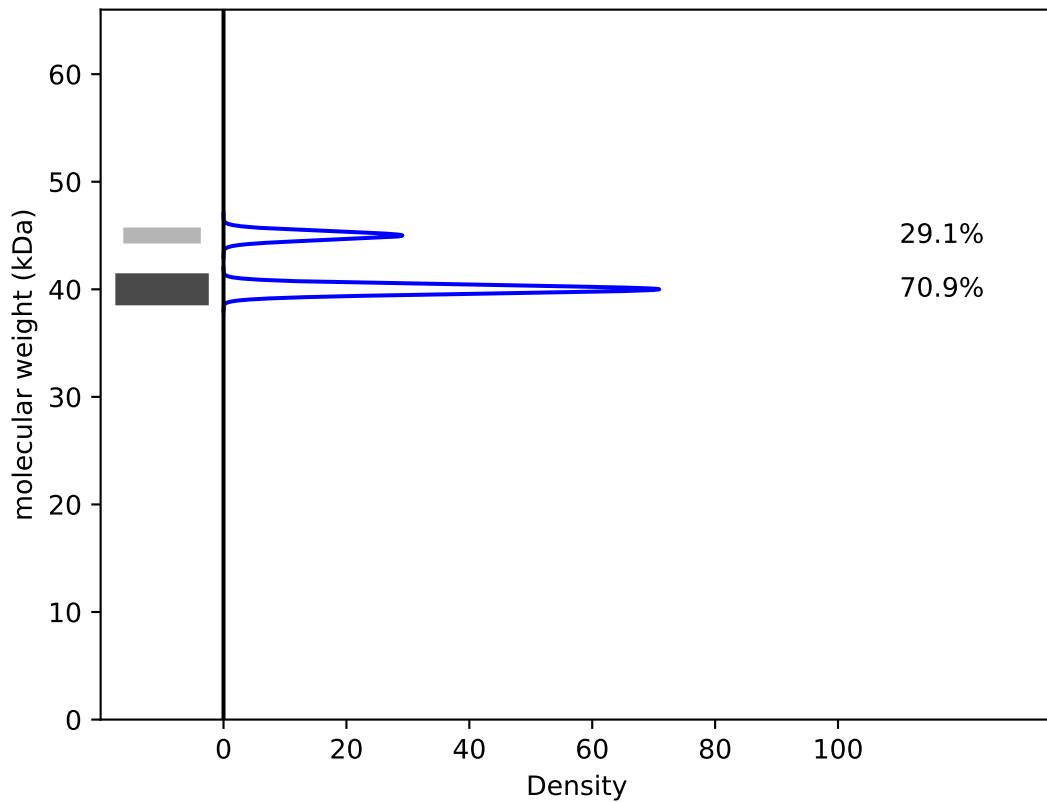



O75830



# P31153



Q00266



# P31350



# P31689

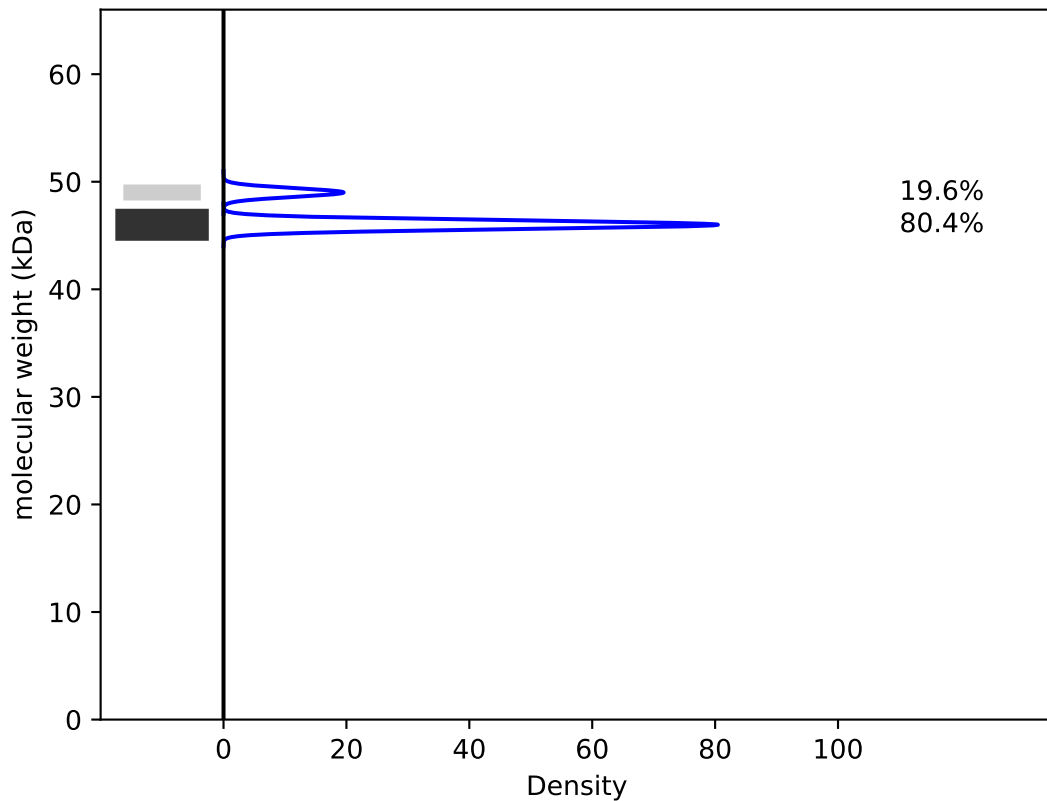

# P31930

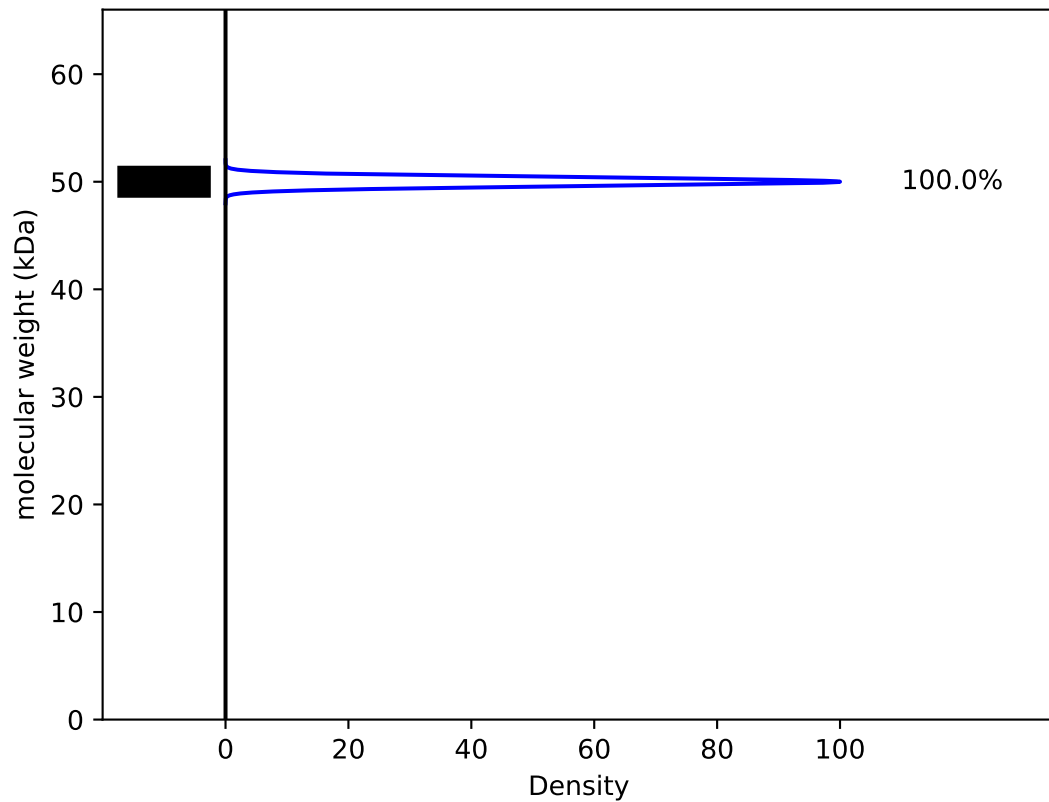

P31942



# P31943

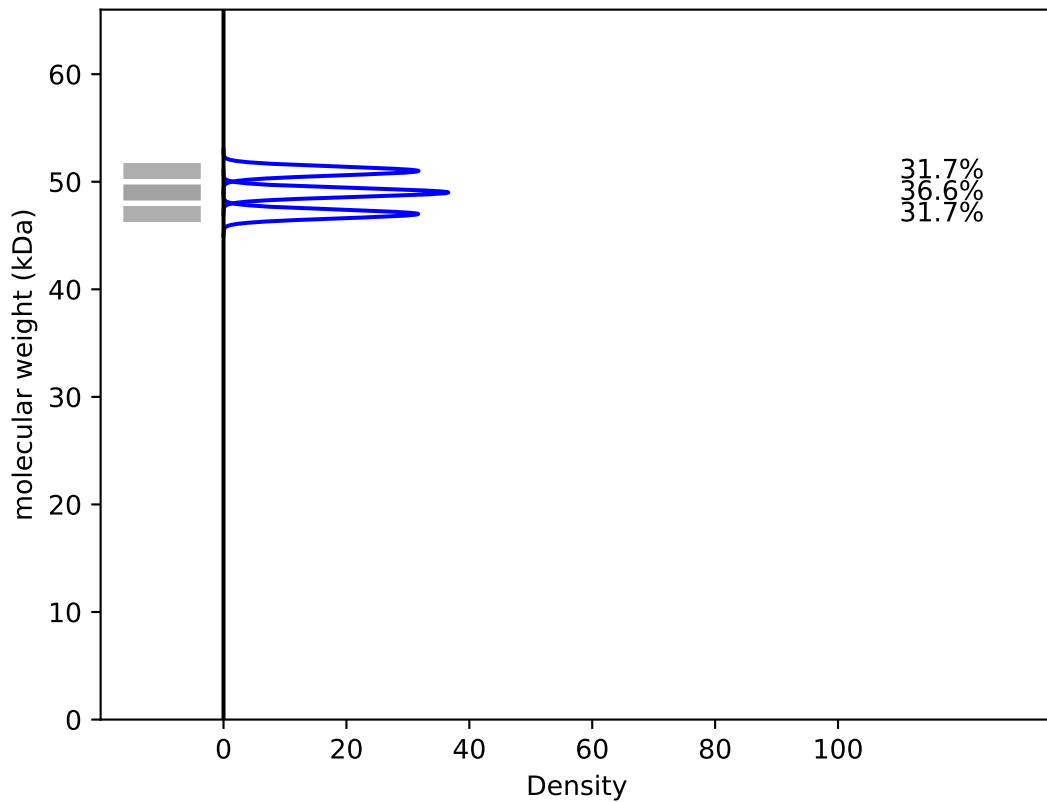



P31946



# P31947

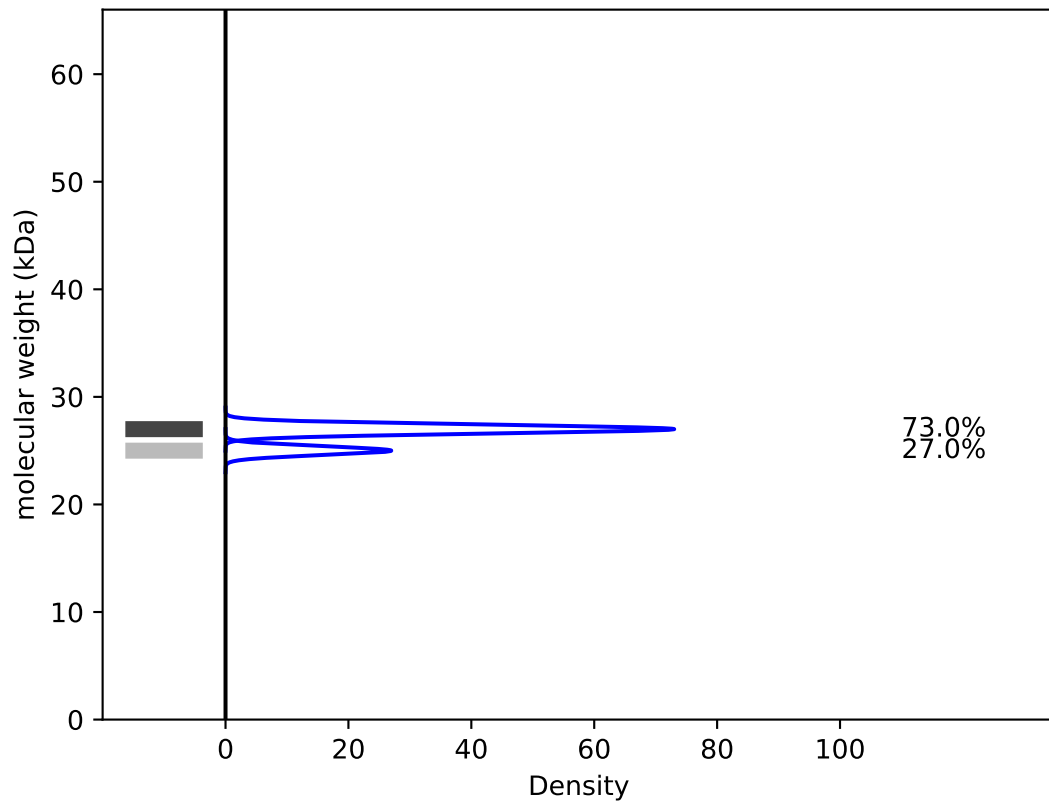

# P32119



P32322



# P32969

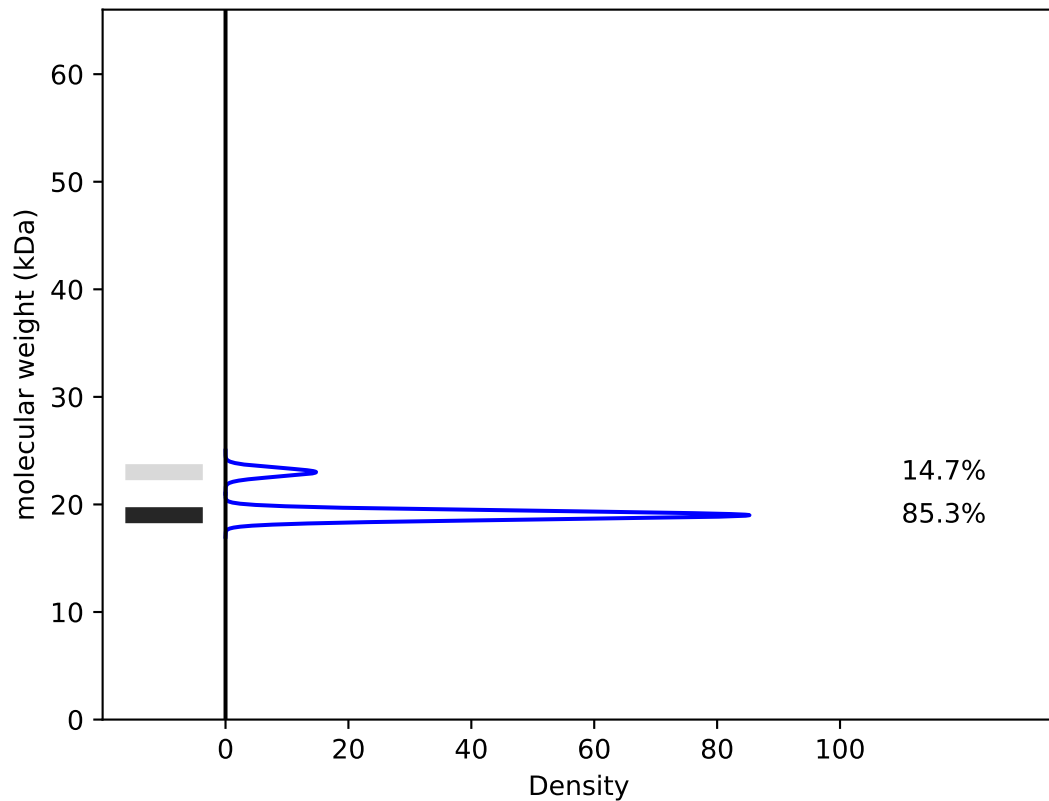

# P34896

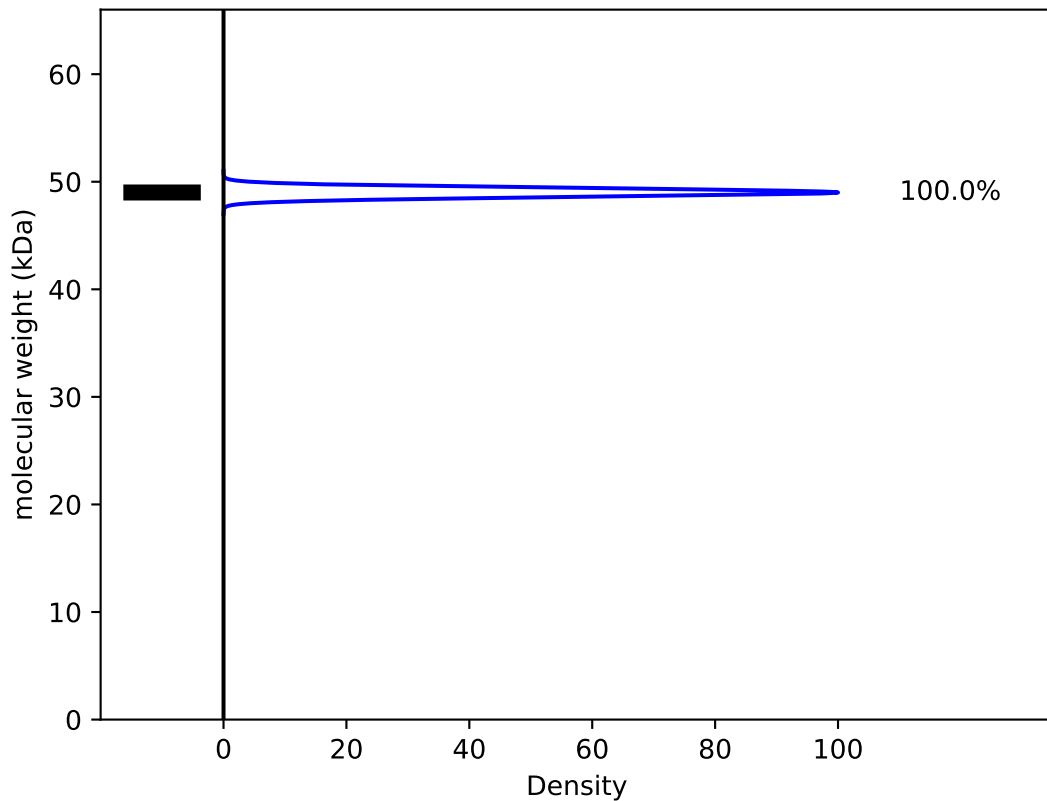

P34897



P35232





P35237



P35249



# P35250

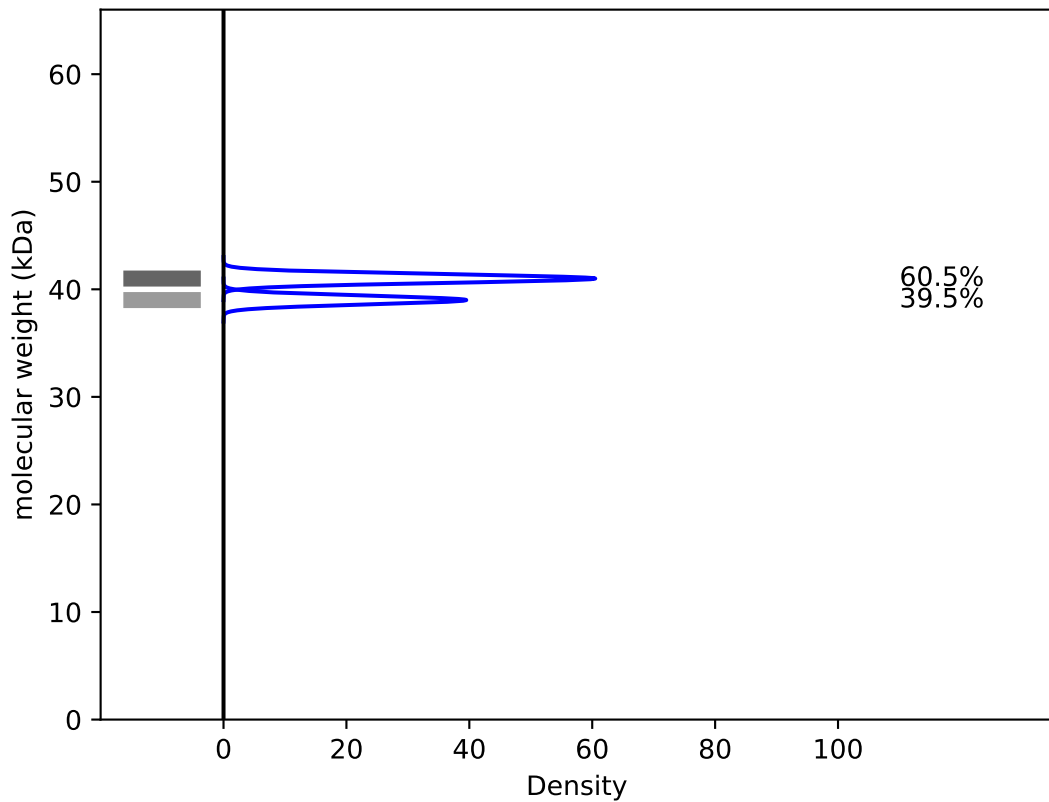

# P35268

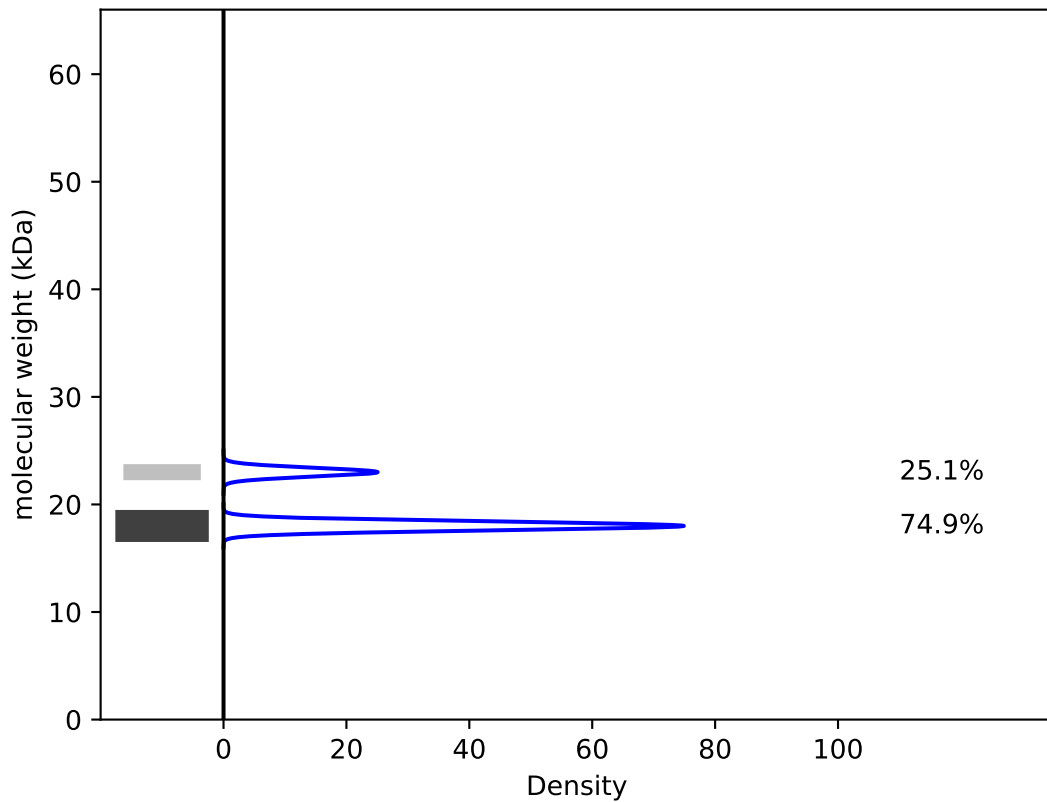

# P35270

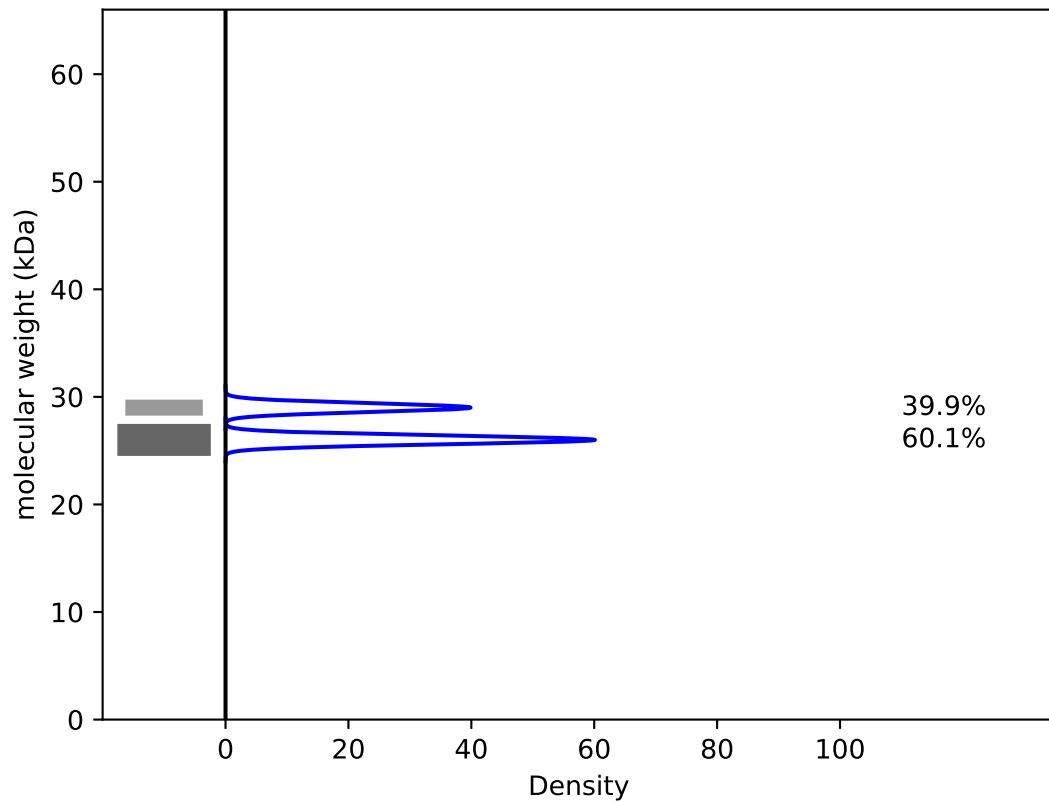

P35613



# P35659

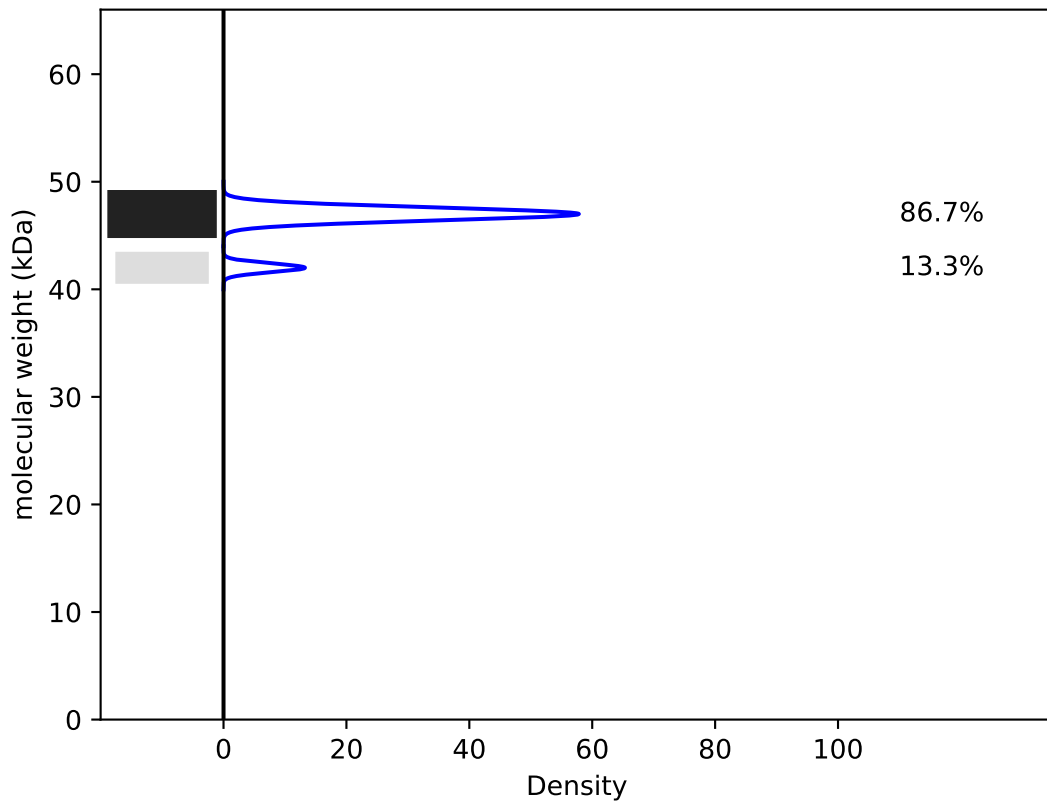

# P35998





# P36404



# P36405

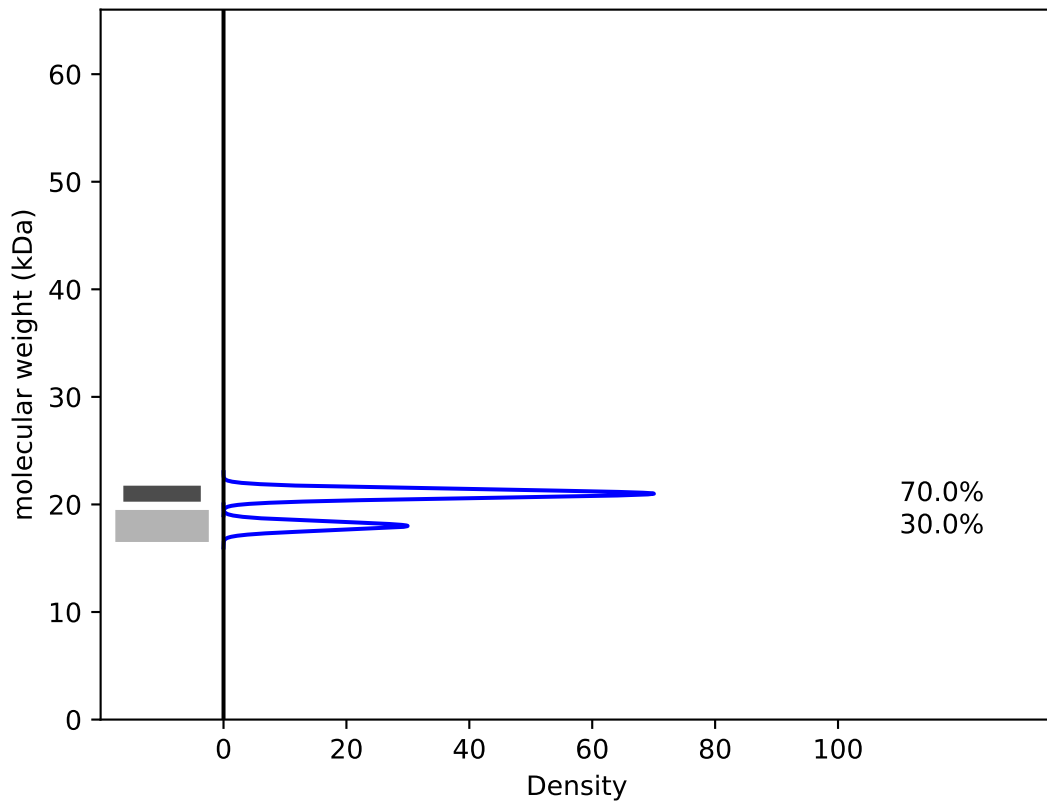

# P36507

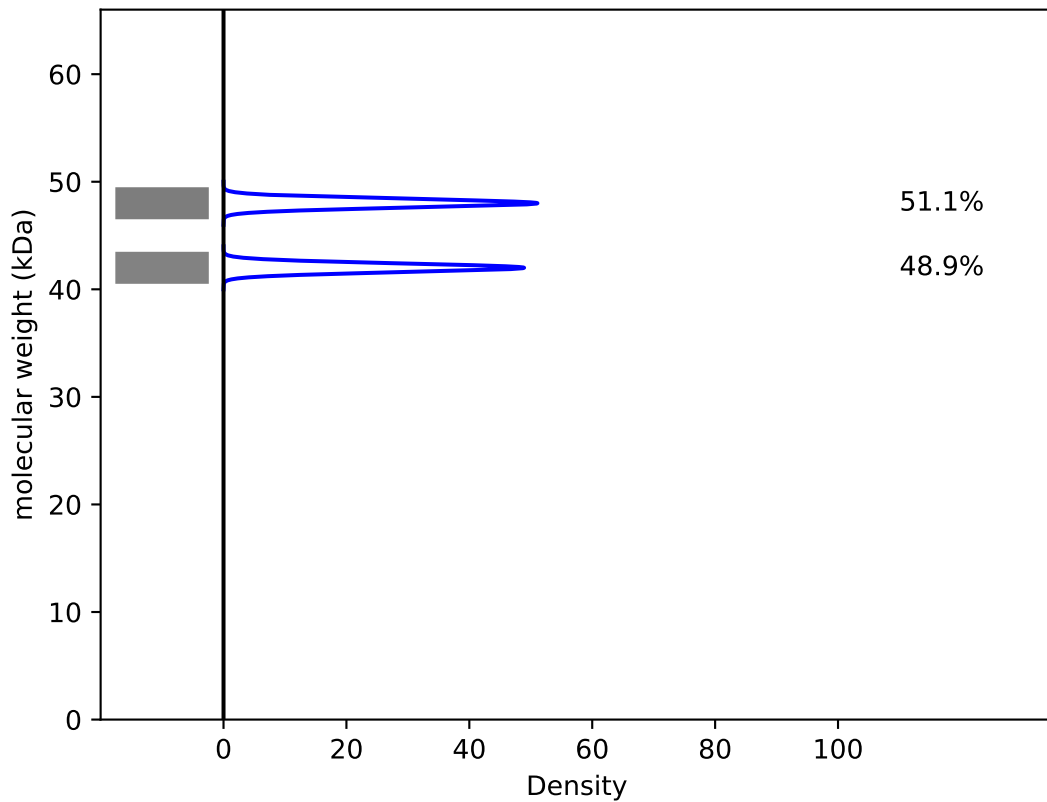

P36542



# P36543

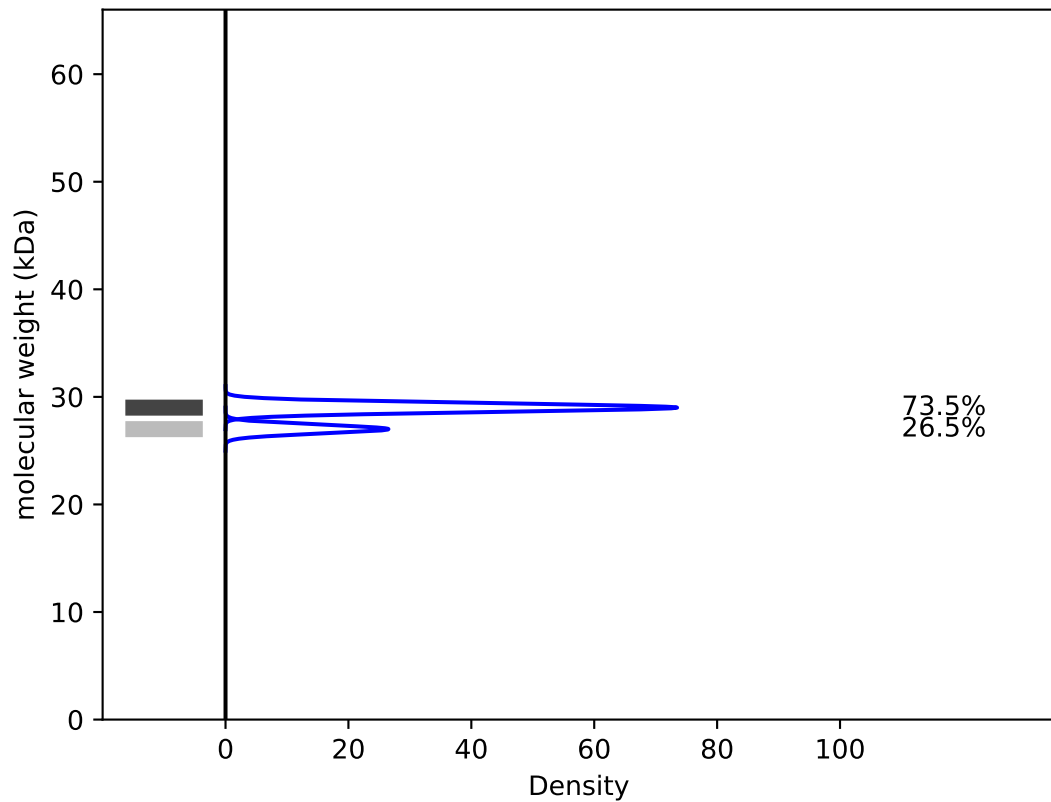

P36578



P36871



P36873





# P36952



P36957



P37235



P84074



# P61601



P37268



# P37802

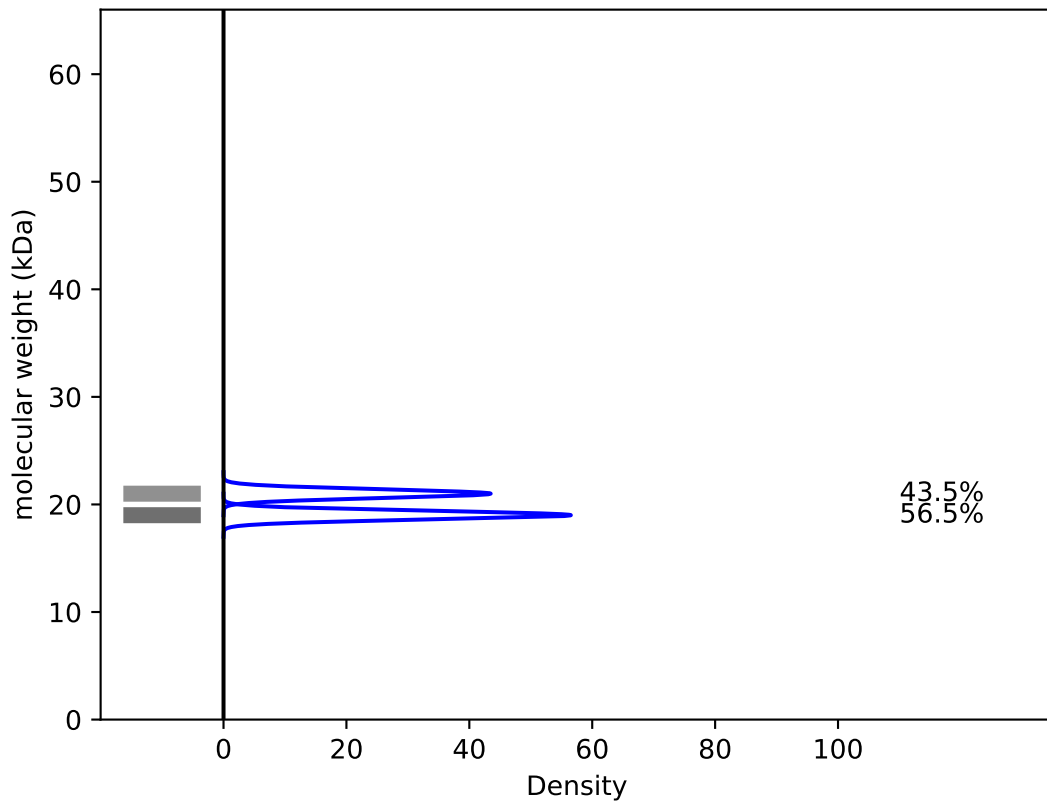

# Q9UI15





P37837



P38117



# P38159



# Q96E39



O75526



P38919



P39023

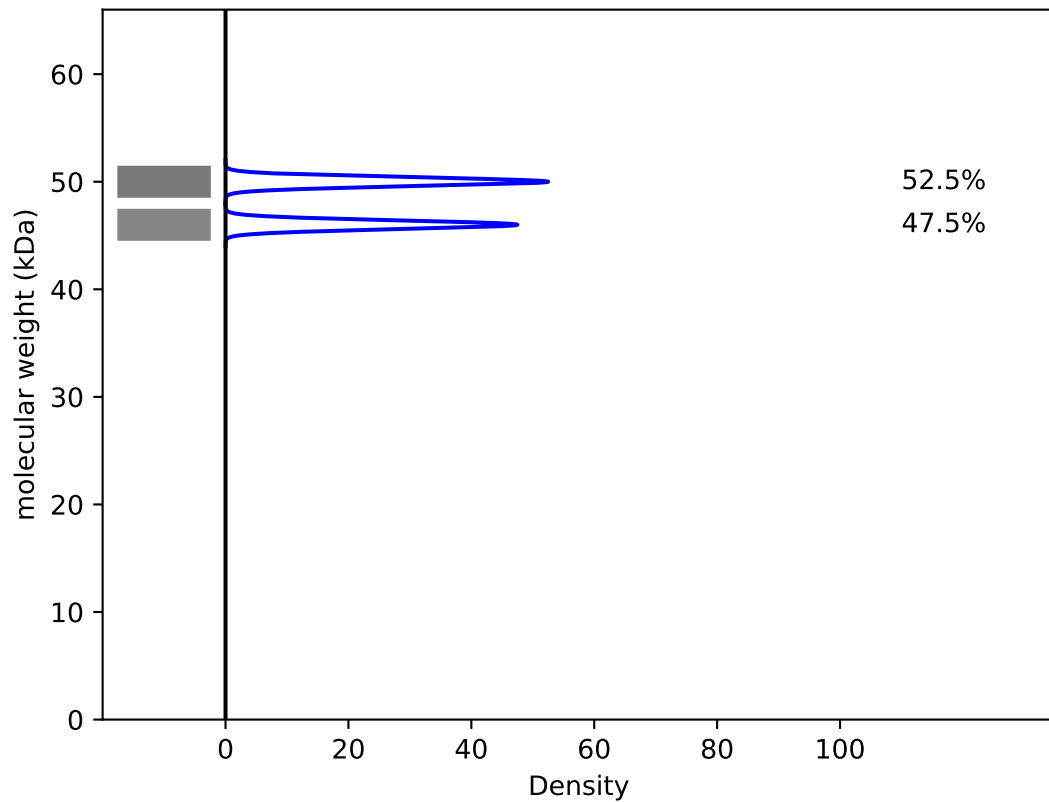

# Q92901

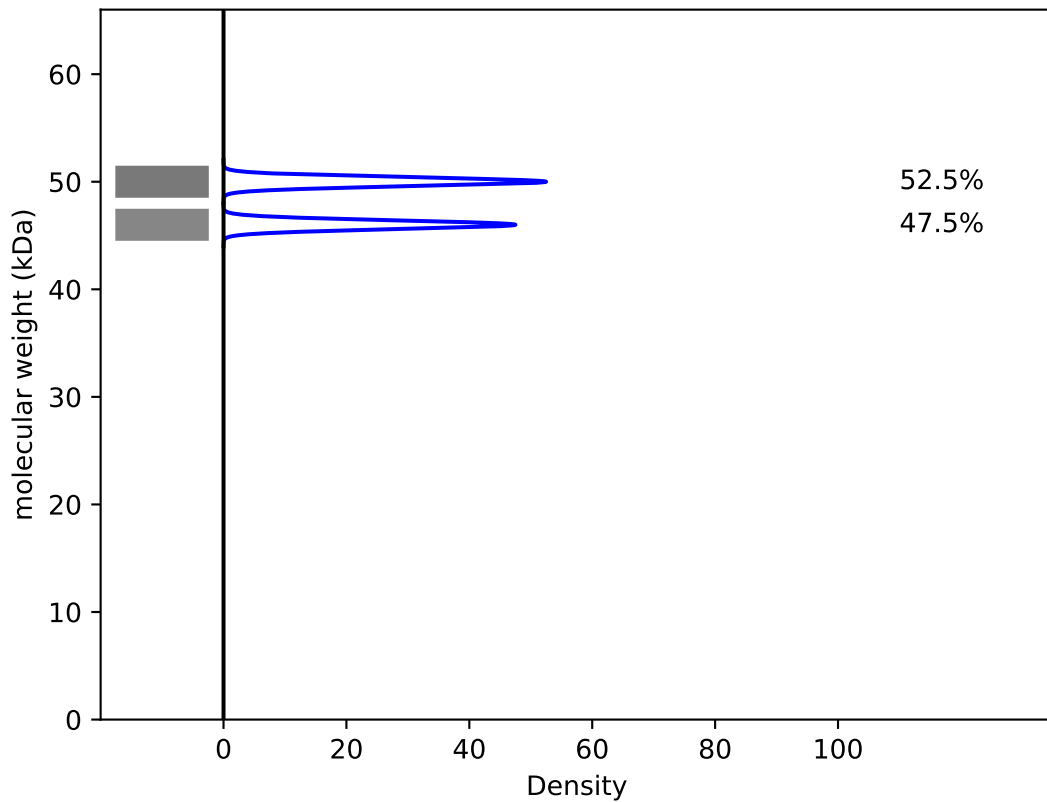



P39687

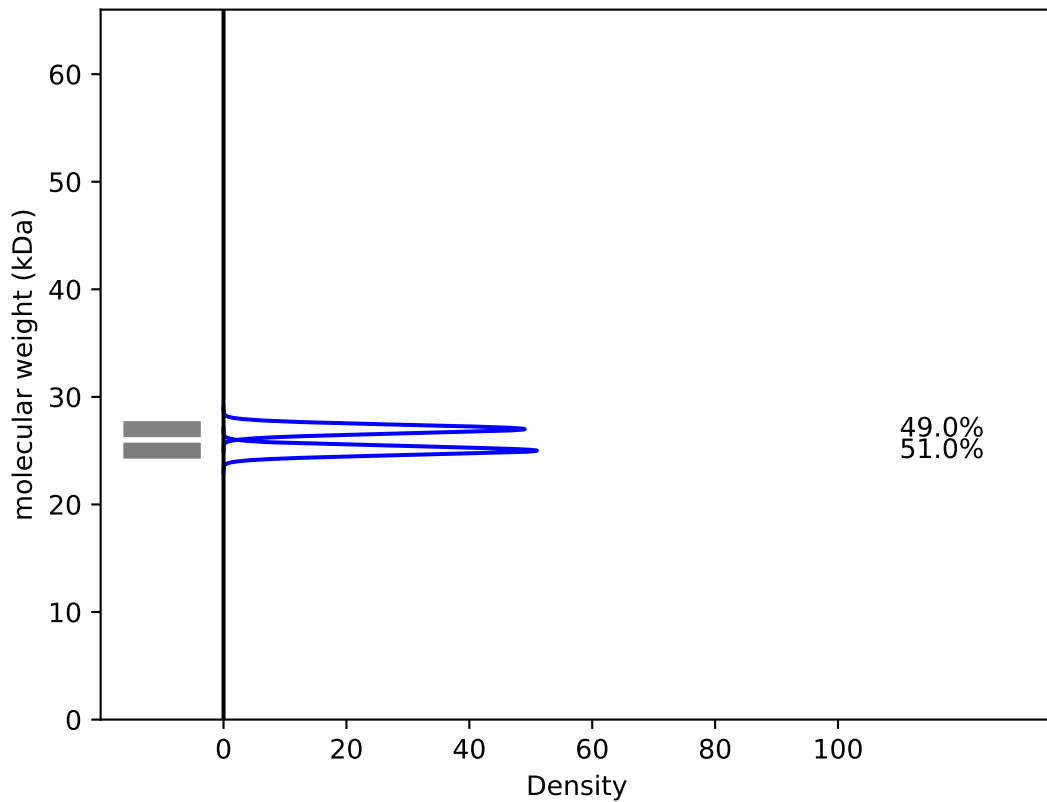

O43423



# P39748

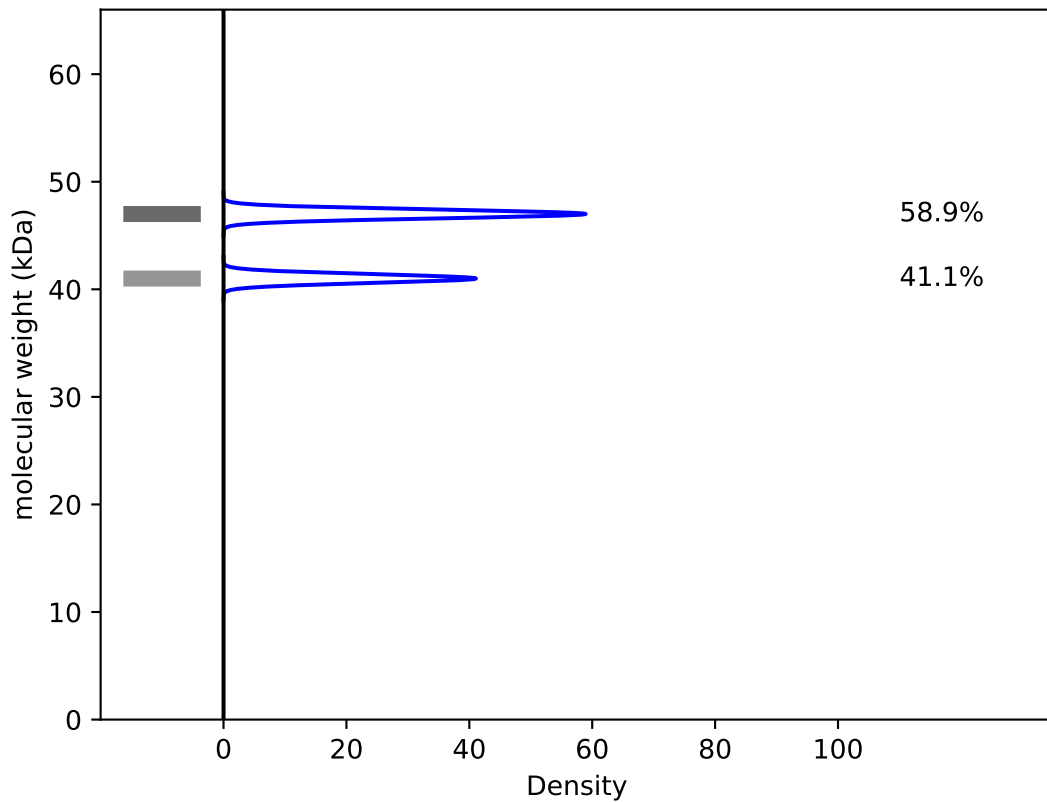

# P40121

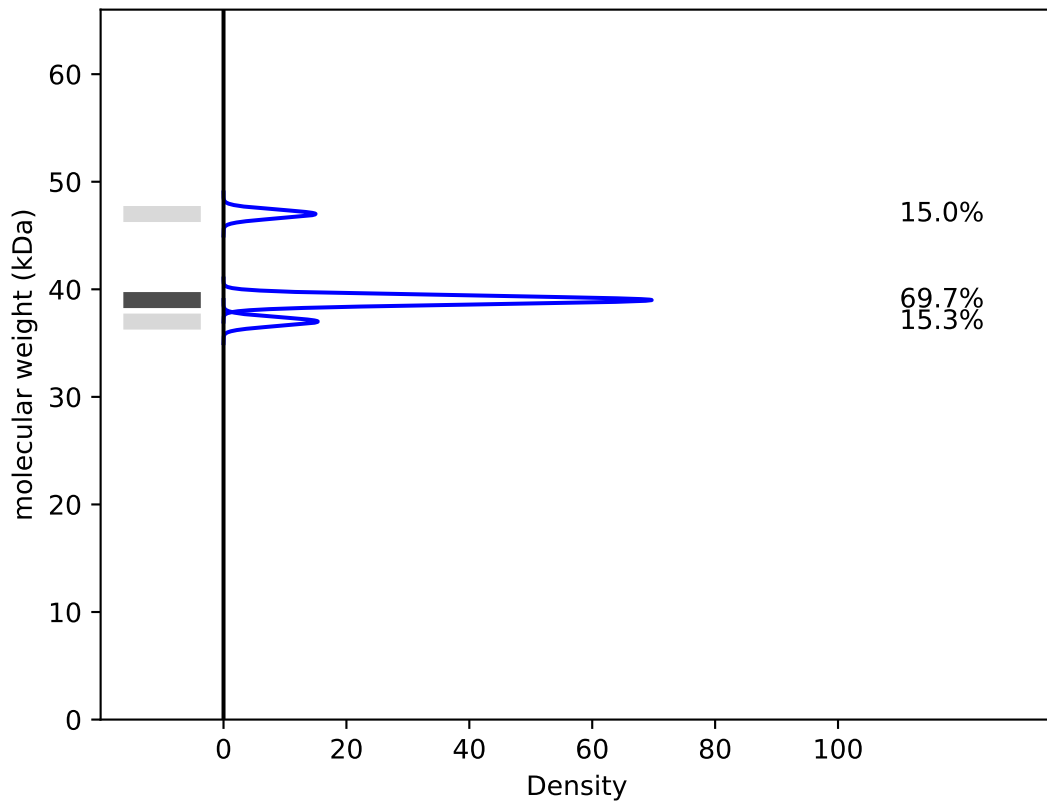

P40227



Q92526



# P40261

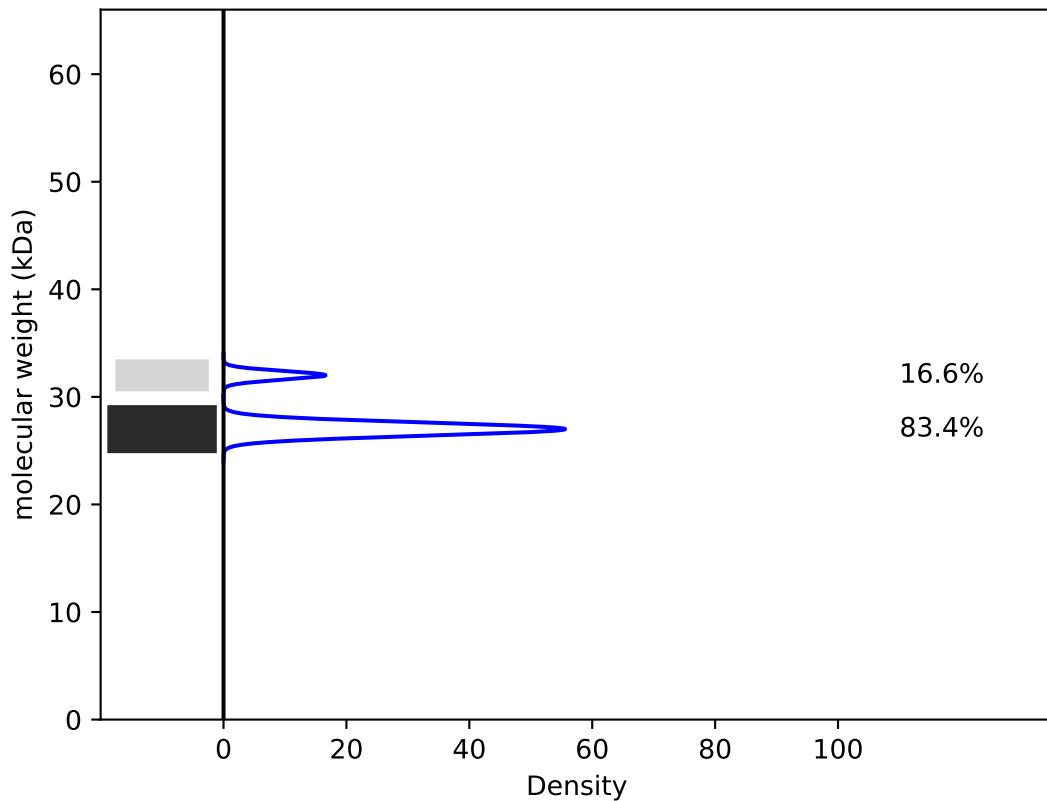

# P40429





# P40616

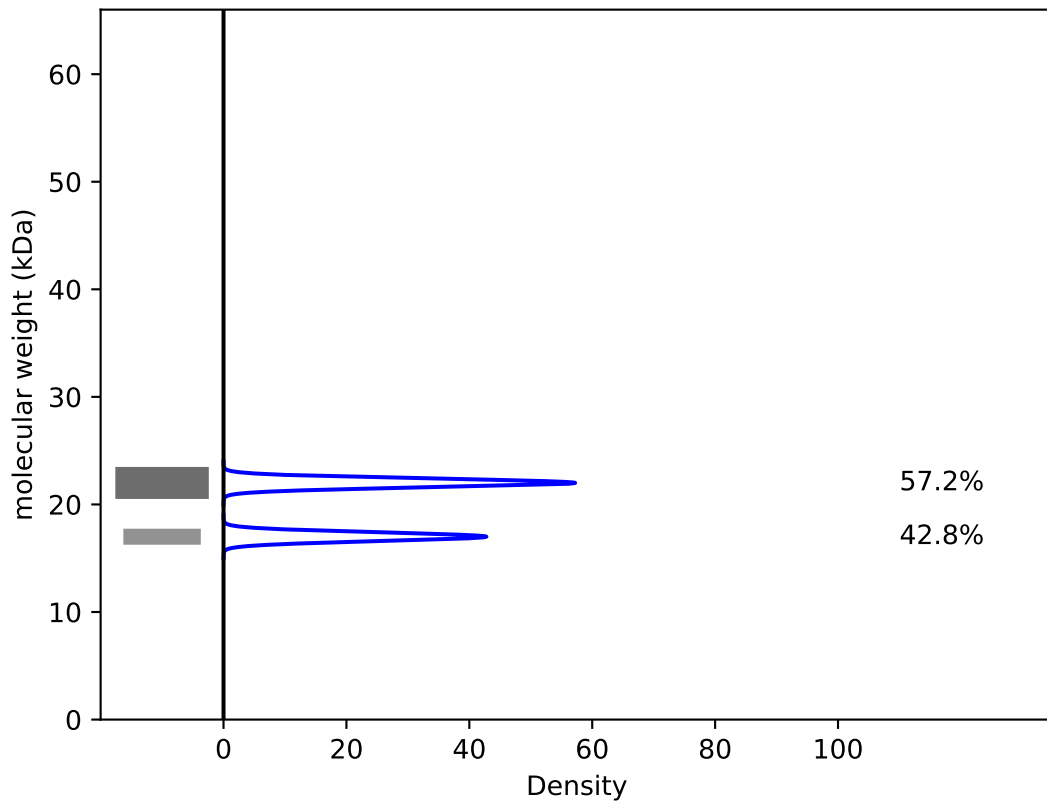

# P40925



P40926



P40937



# P40938



P41091



# Q2VIR3



P41227





# Q9BSU3



# P41240

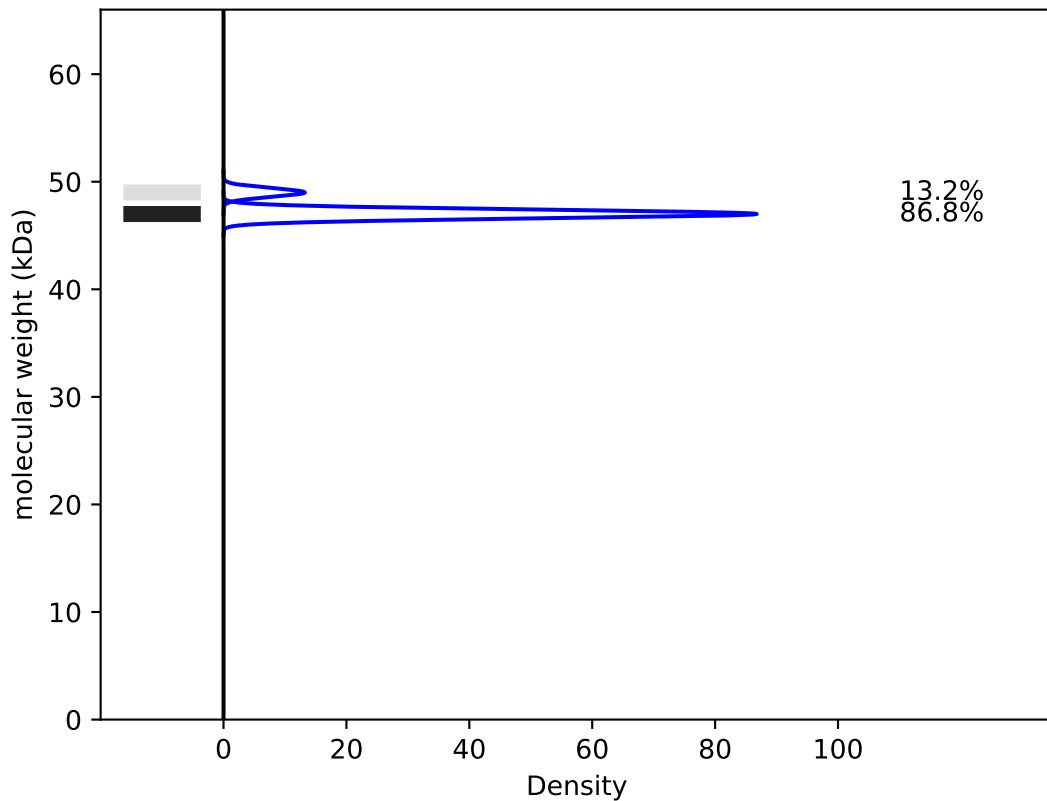

P41247



# P42330

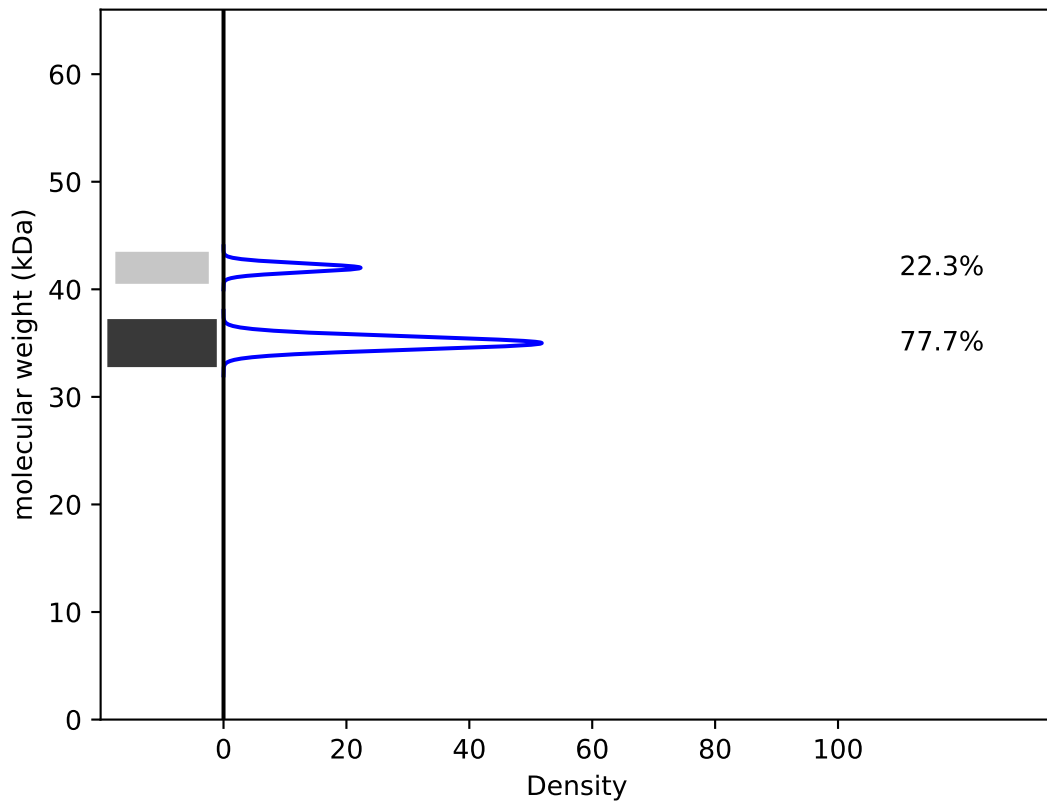

# Q04828

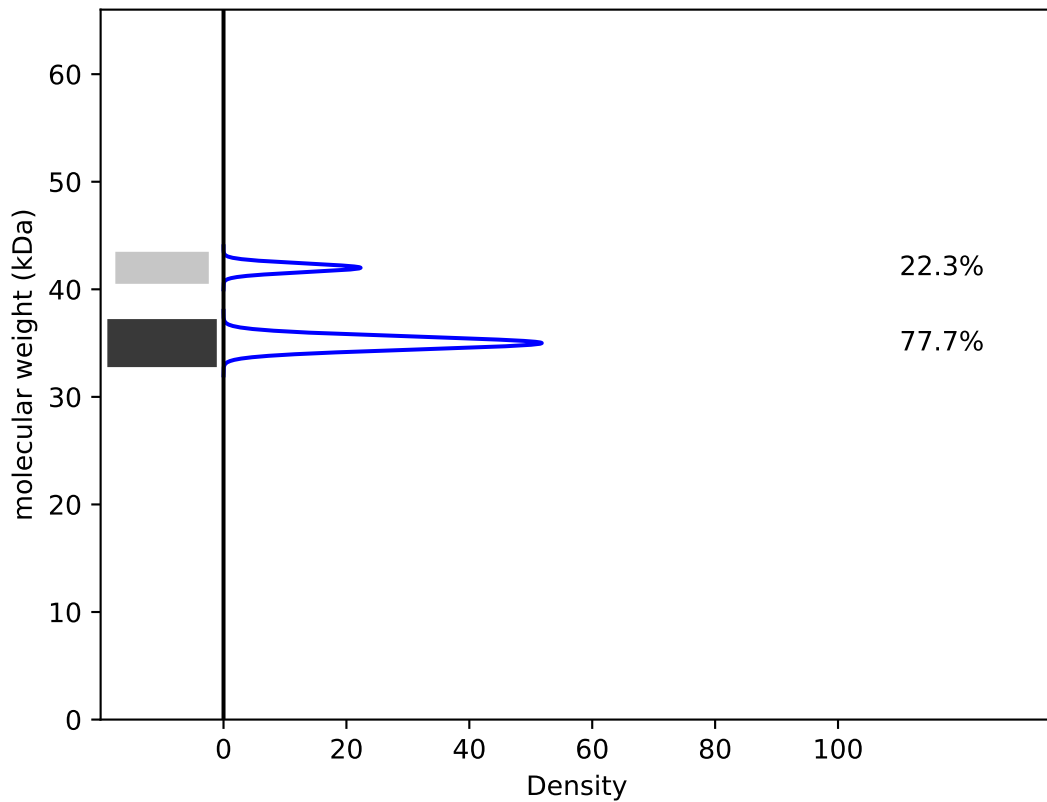

# P52895



# P17516



# P42765

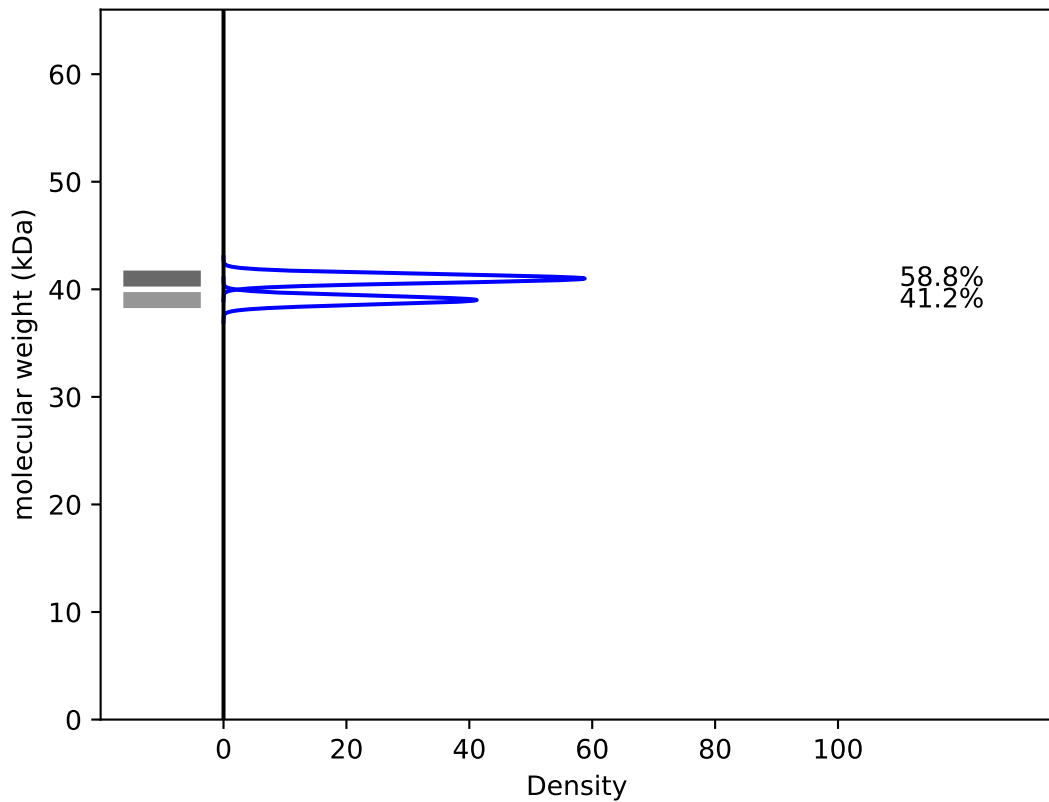



P43034



P43307



# P43487

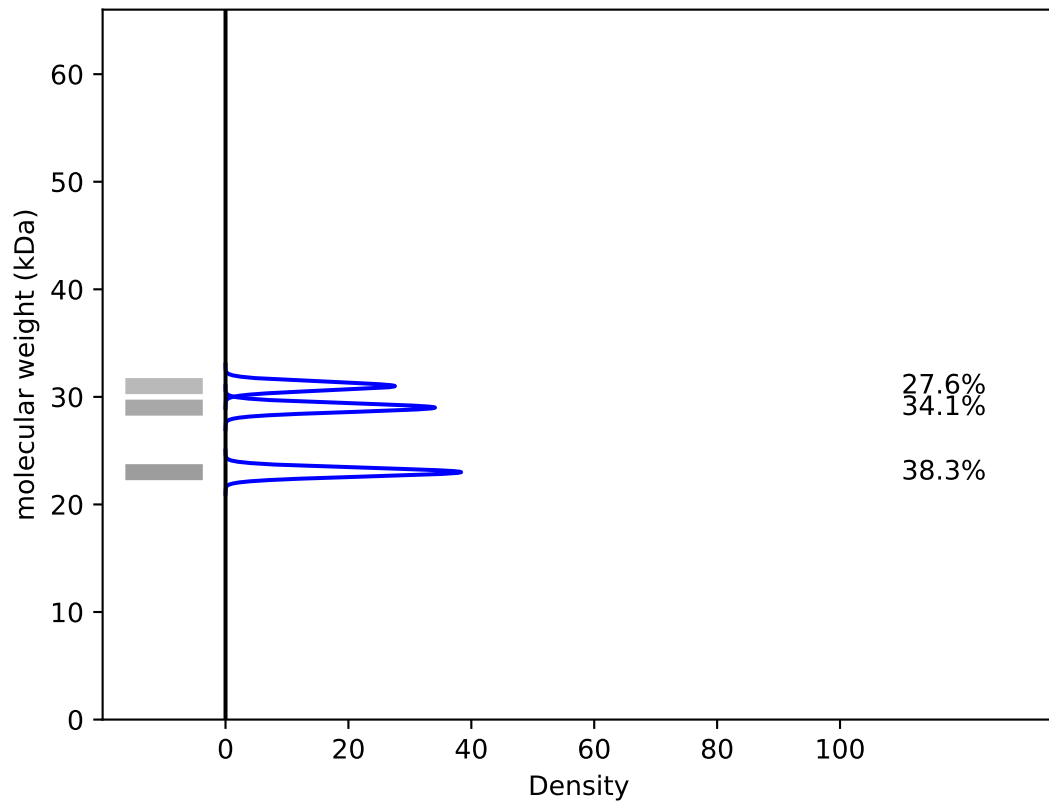

# P43686

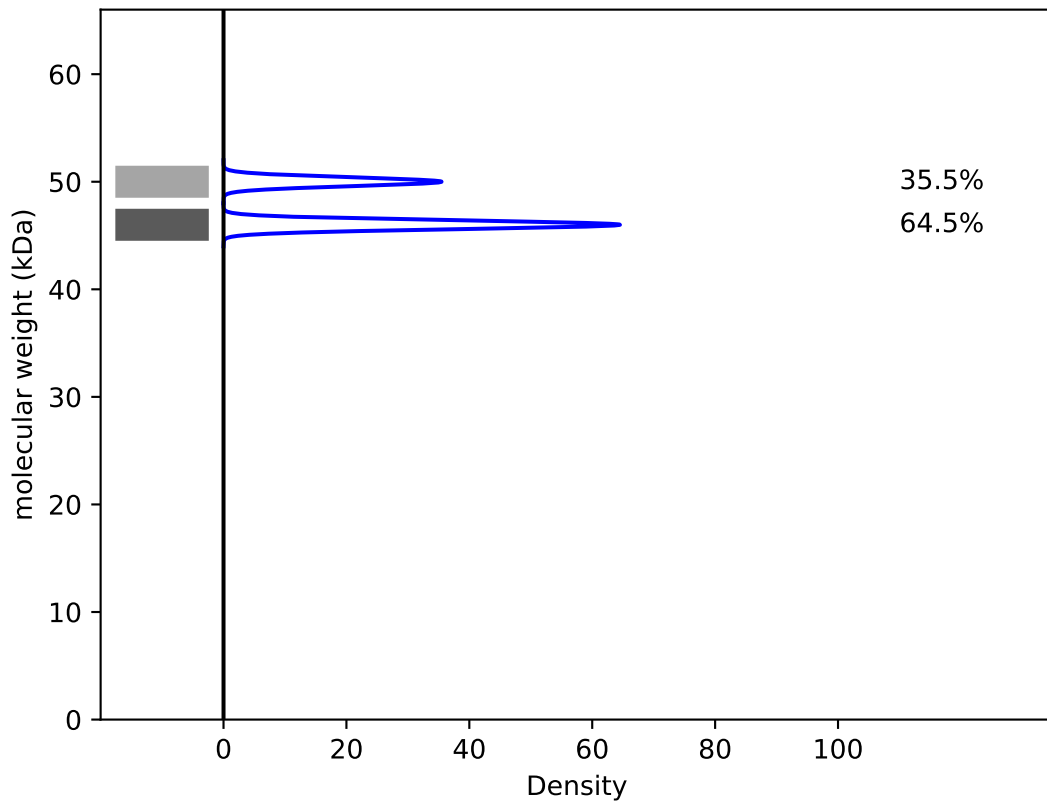

# P45877

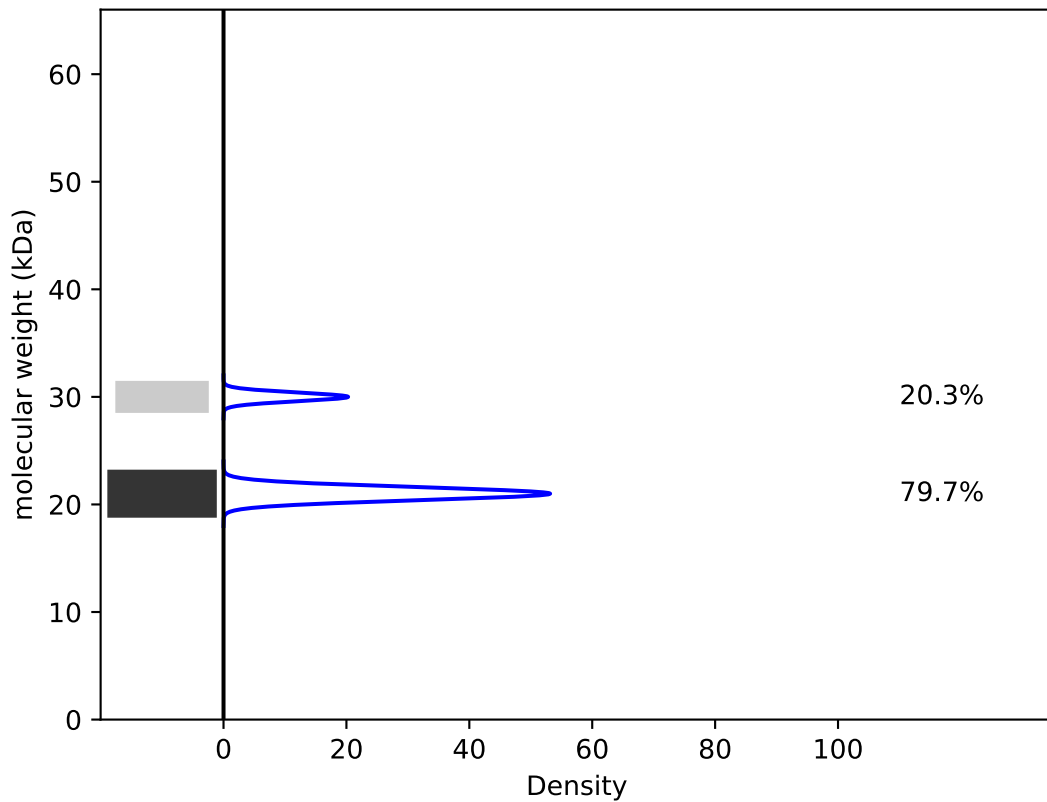

# P45880

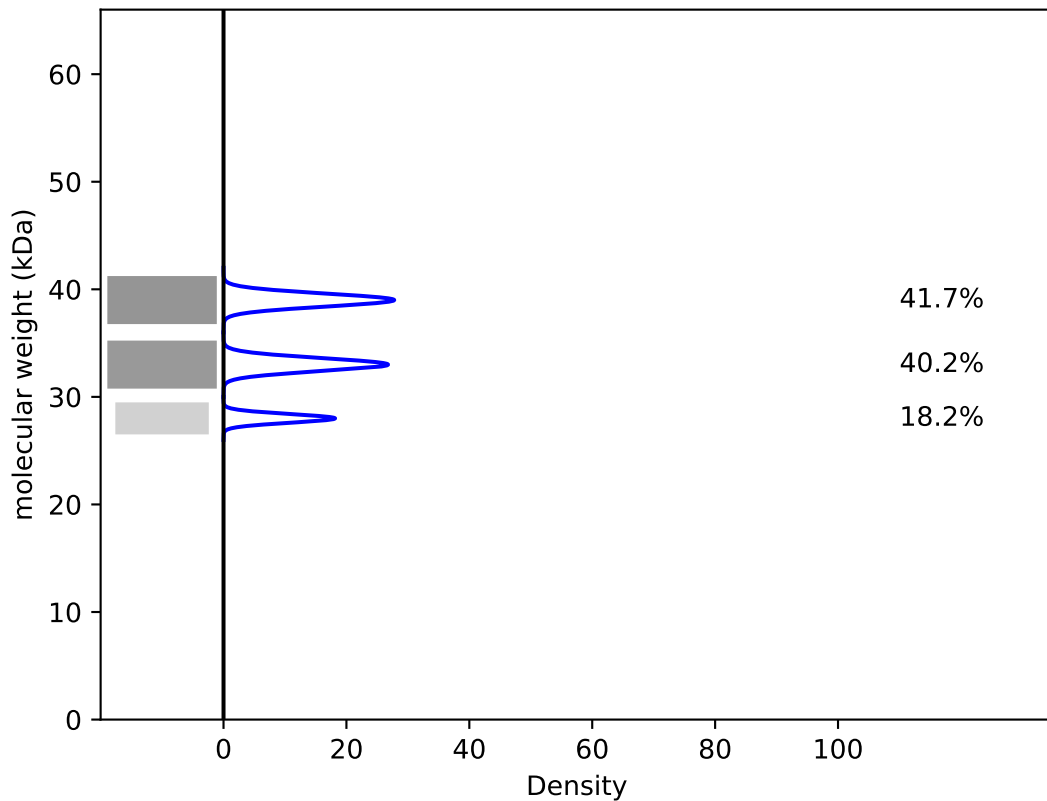

# P45954



# P46108

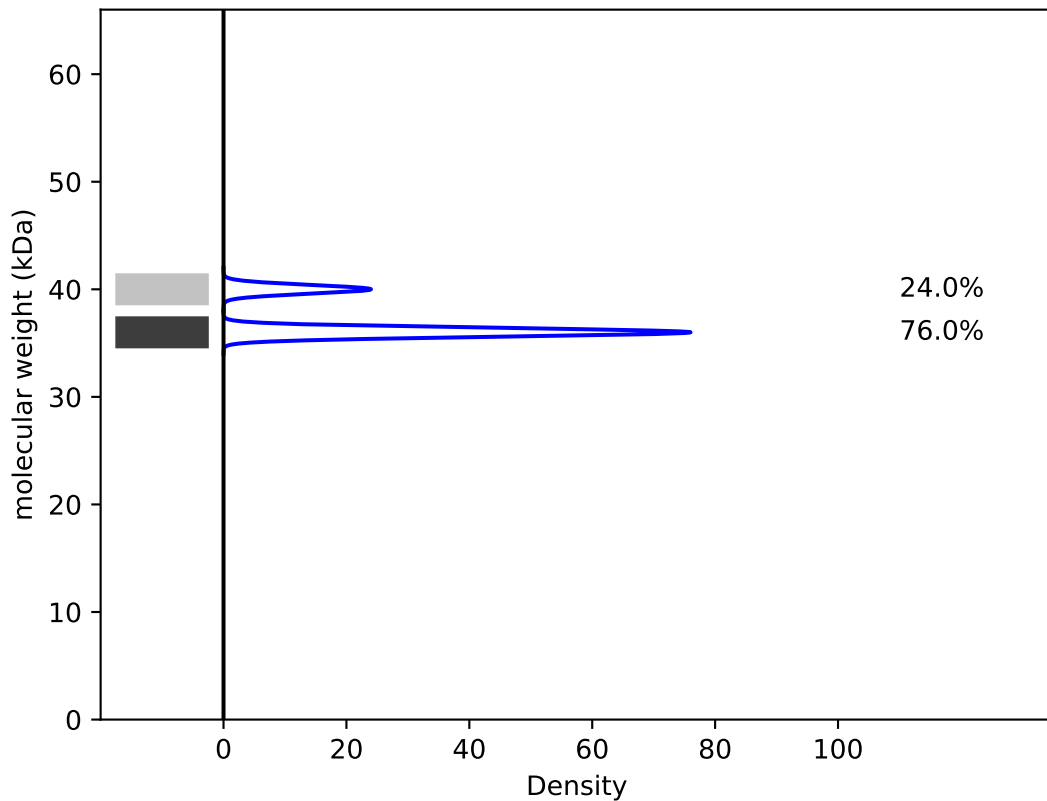



# P46109

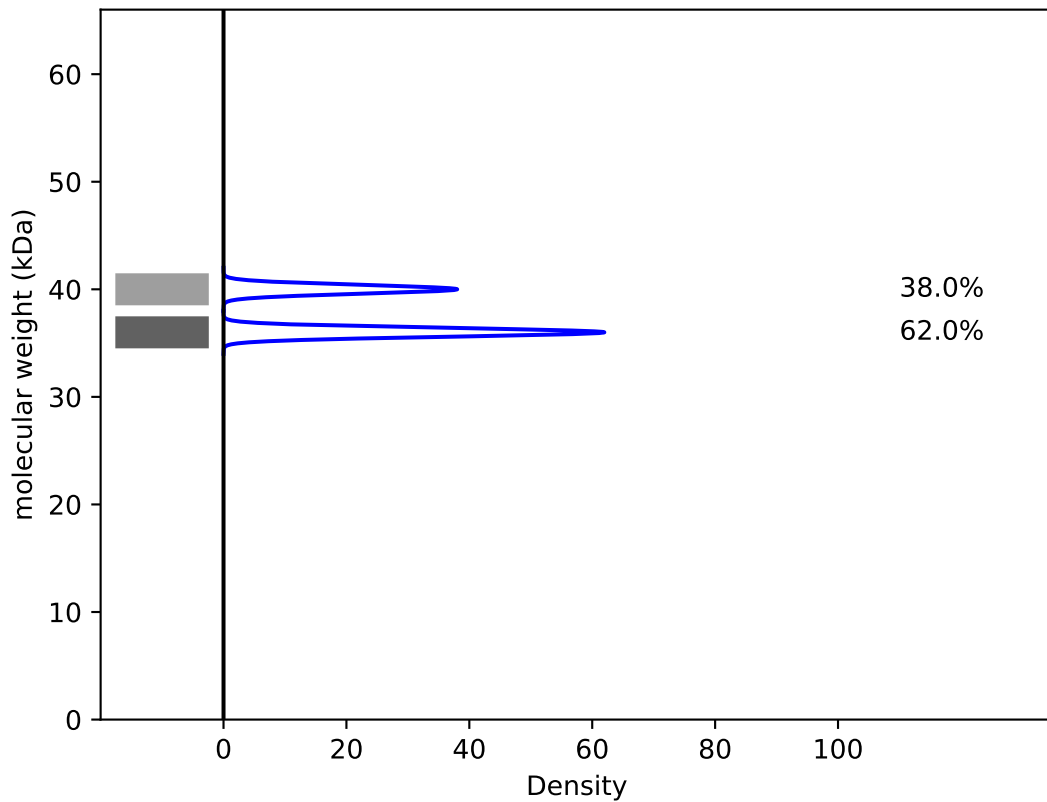

# P46776

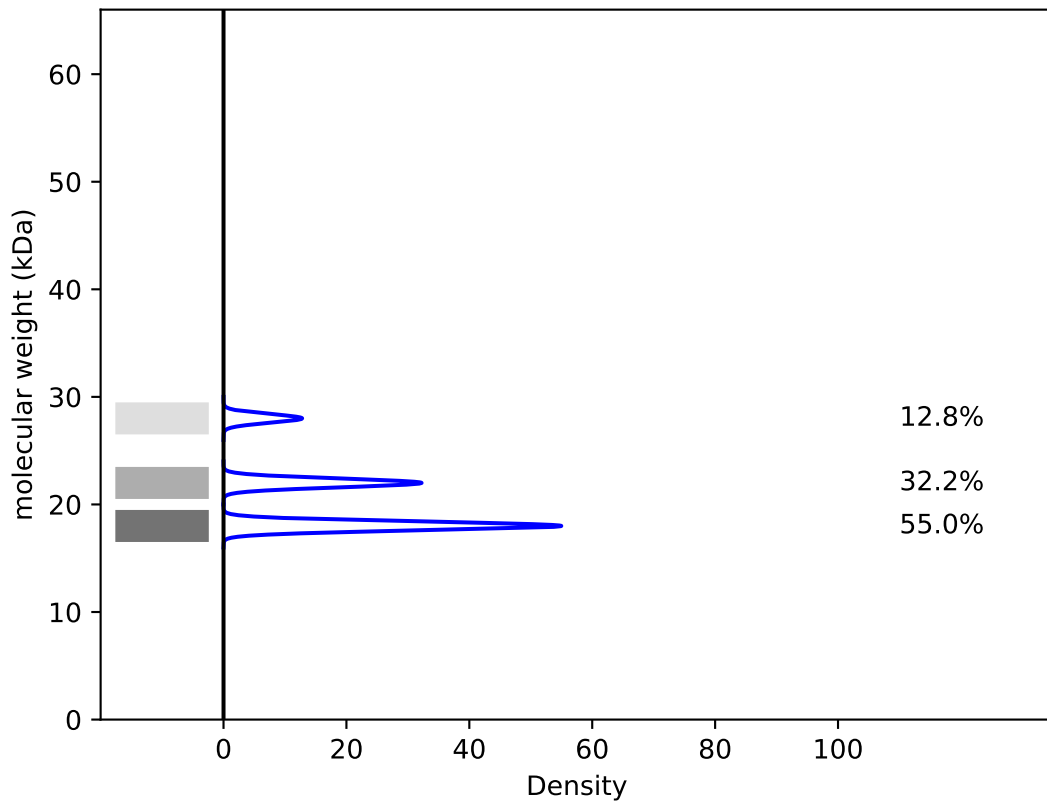

P46777



# P46778

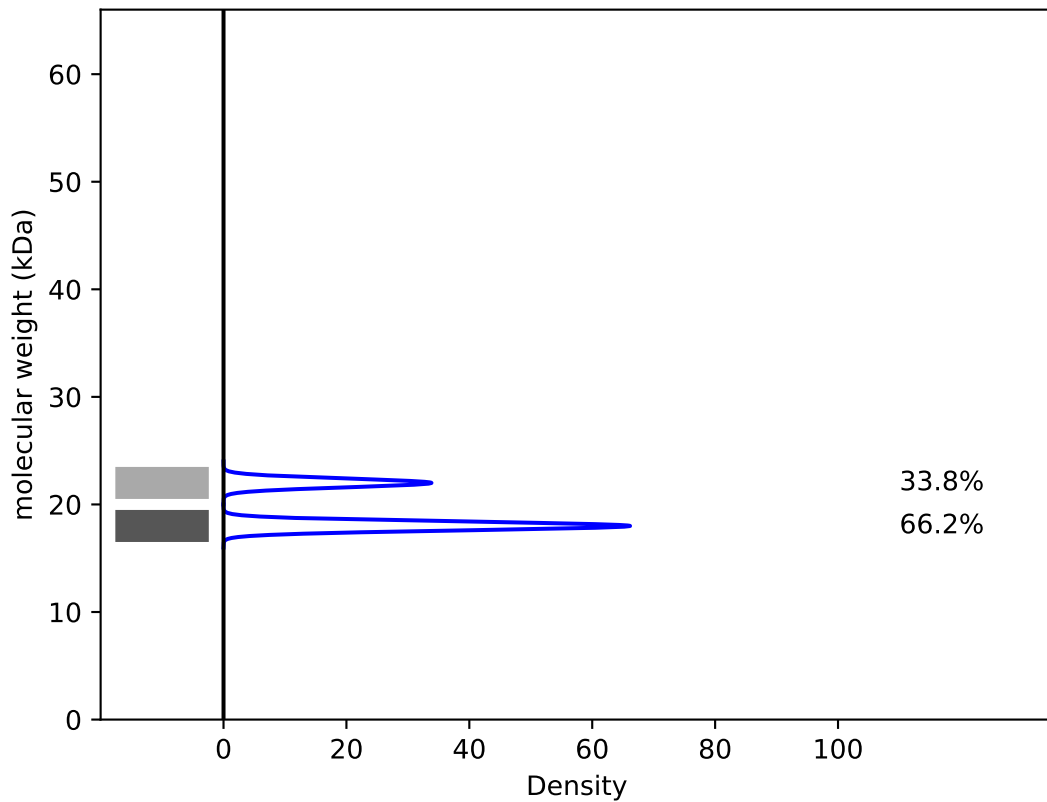

P46779



# P46781

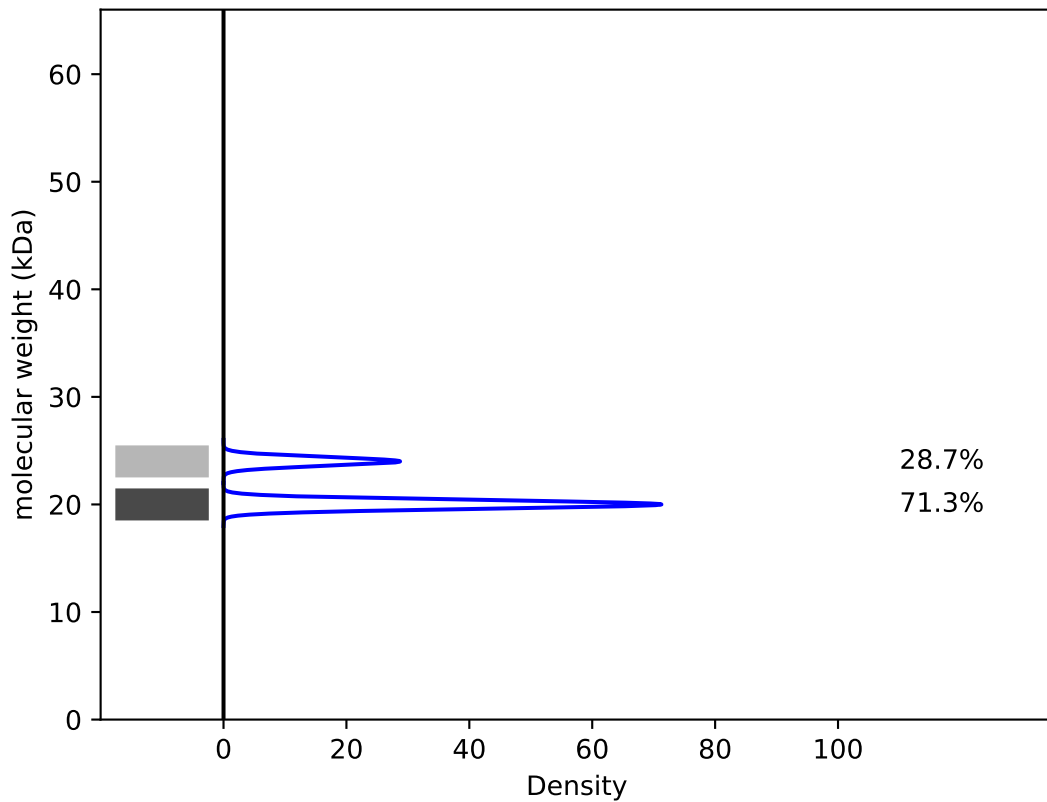

# P46782

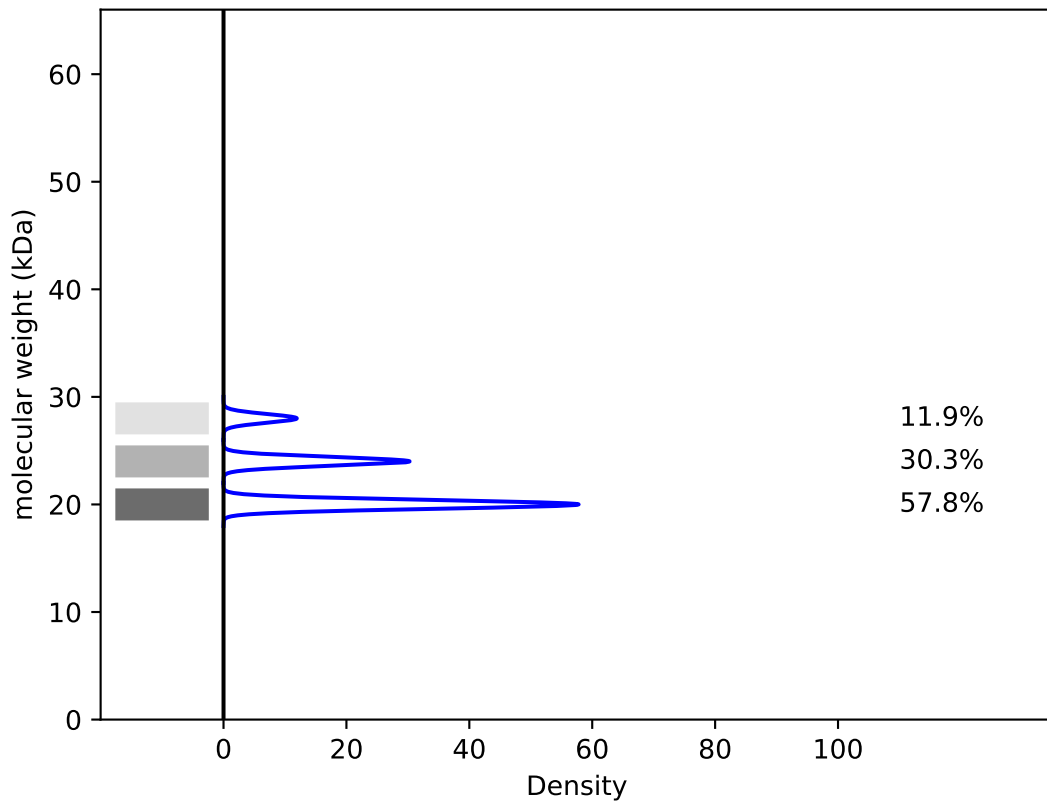

P46783





# Q9NQ39



P46926



# Q8TDQ7



# P47755

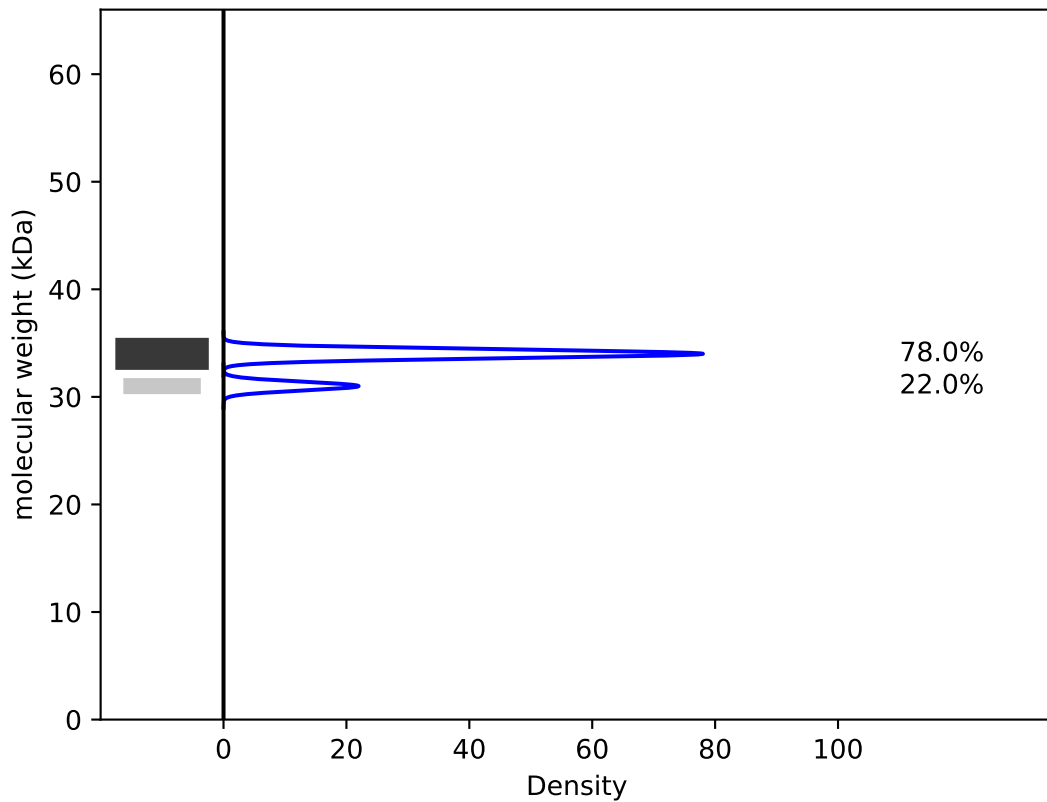

# P47756

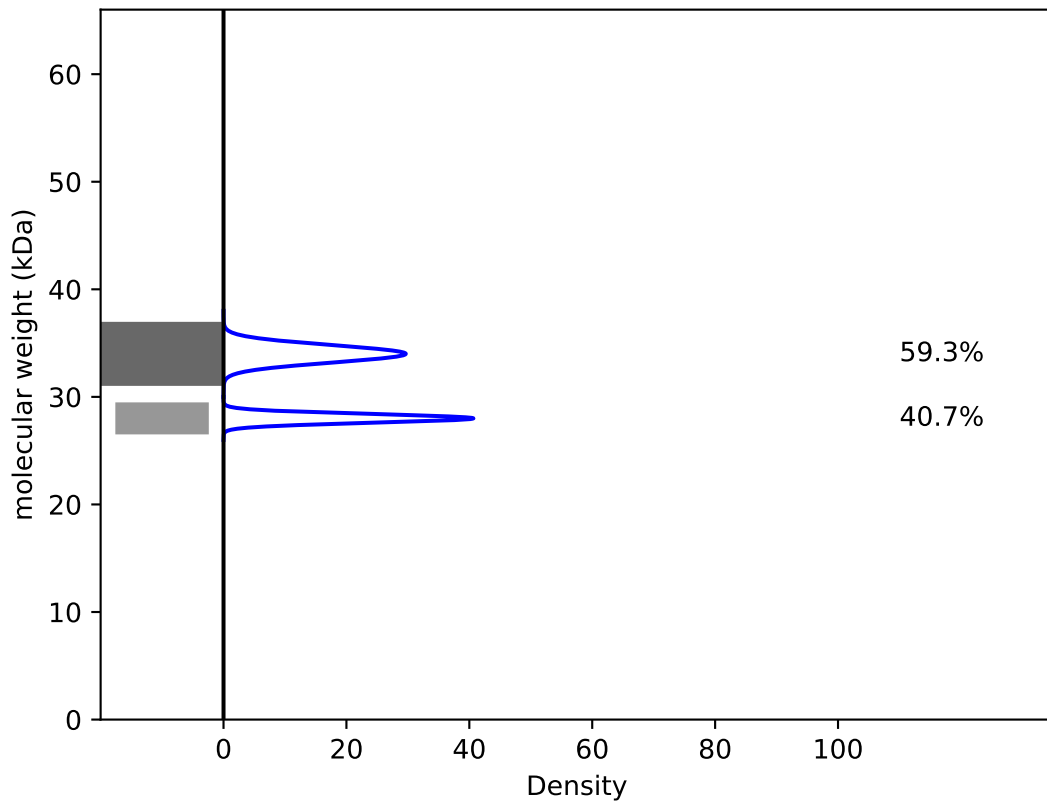

# P47813



O14602



# P47914

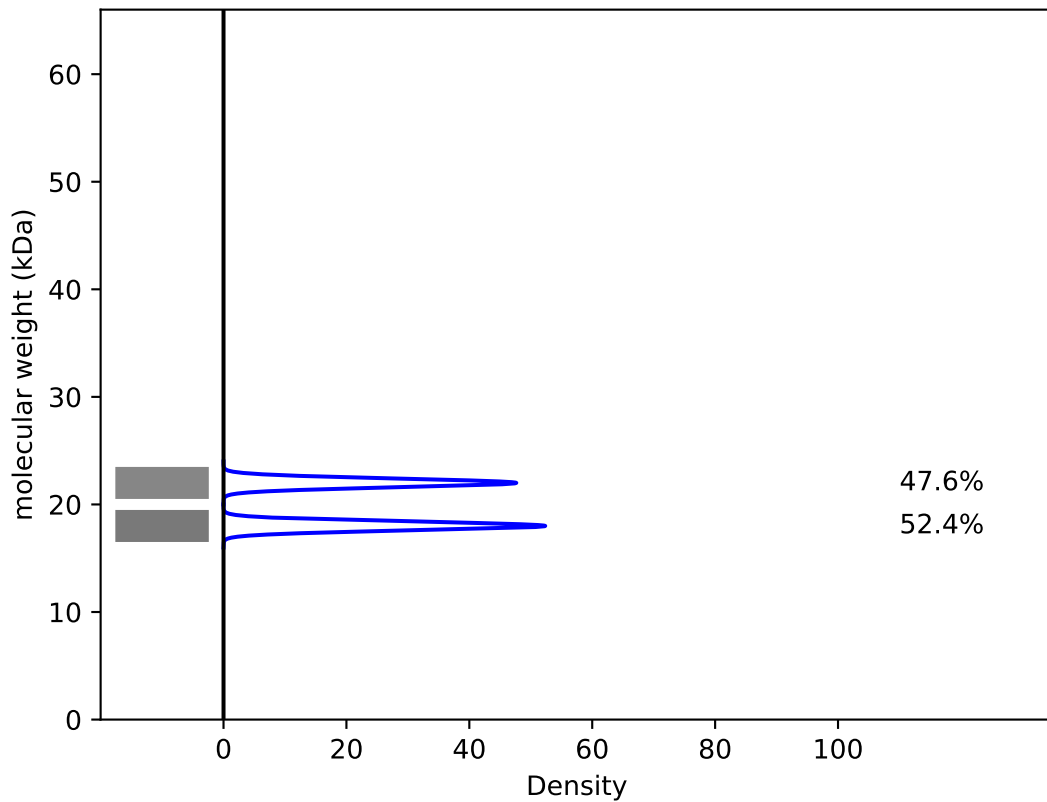



# P48047

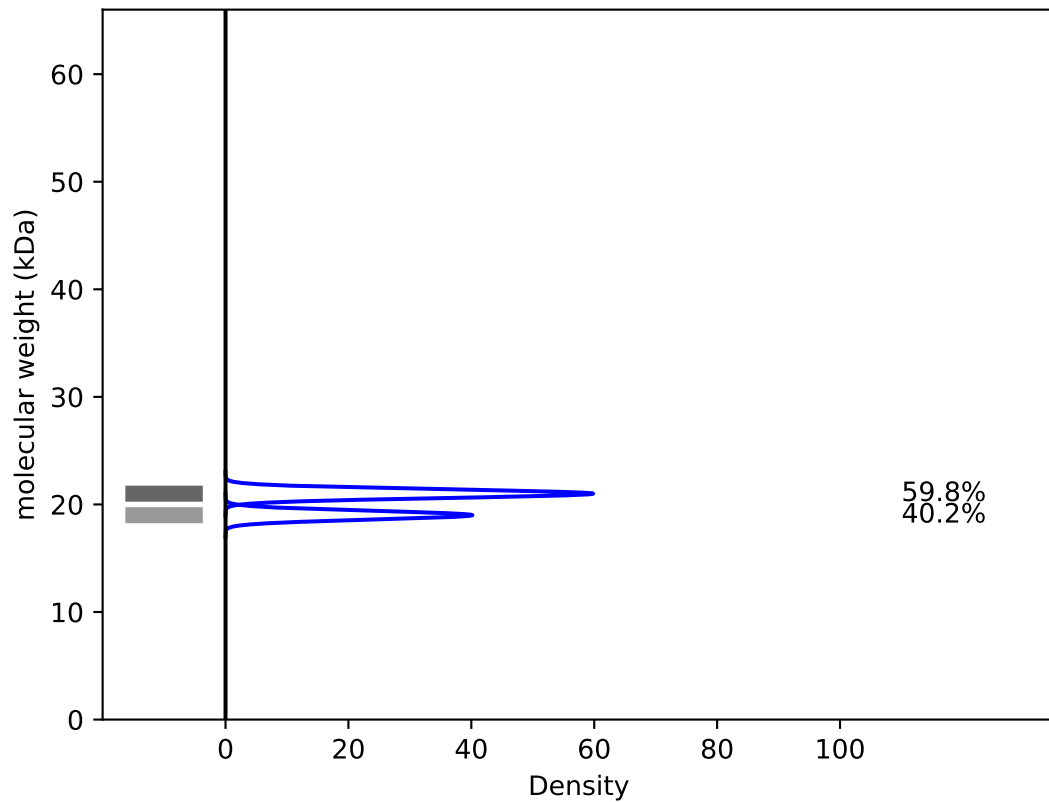

P48444



P48643



P48739



# P49189



P49354



# P49366

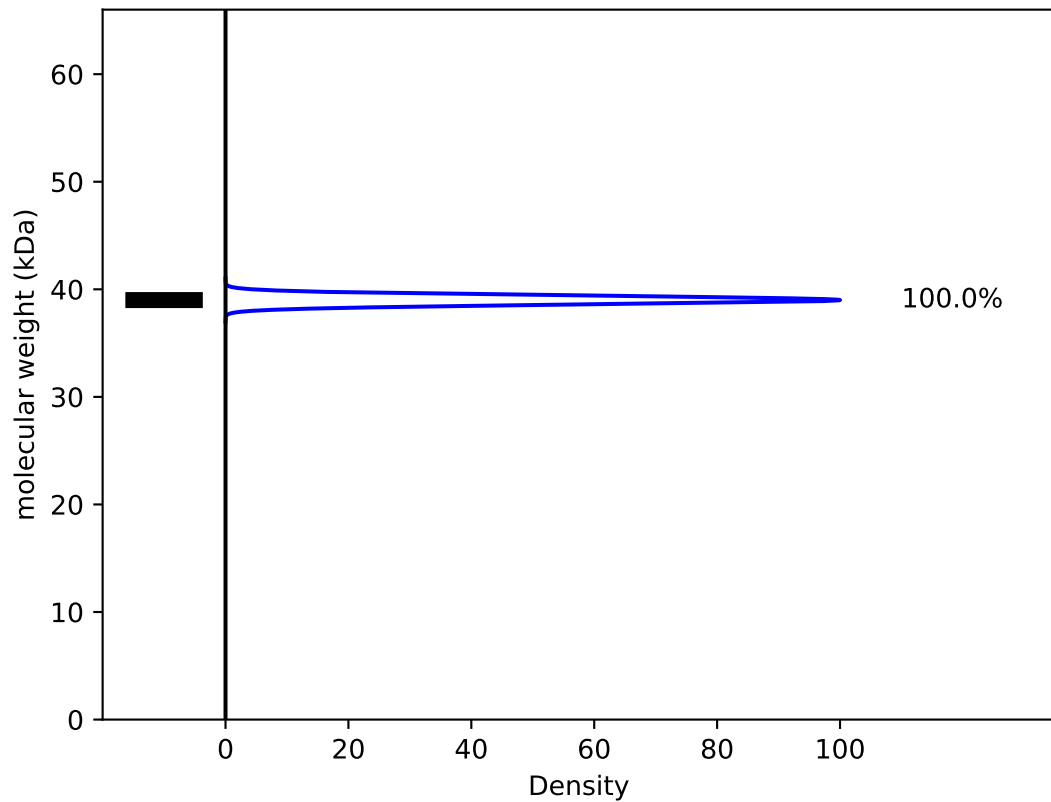

# P49368





P49406



# P49411

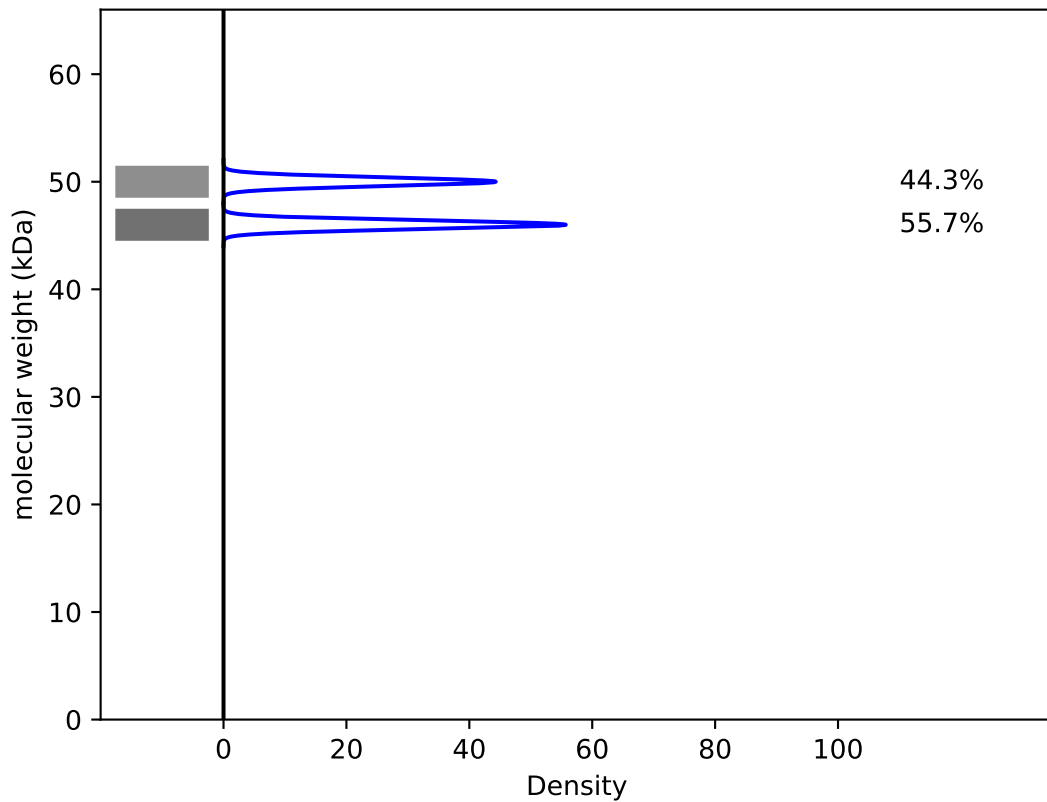

# P49591



P49642



P49643



# P49720



# P49721

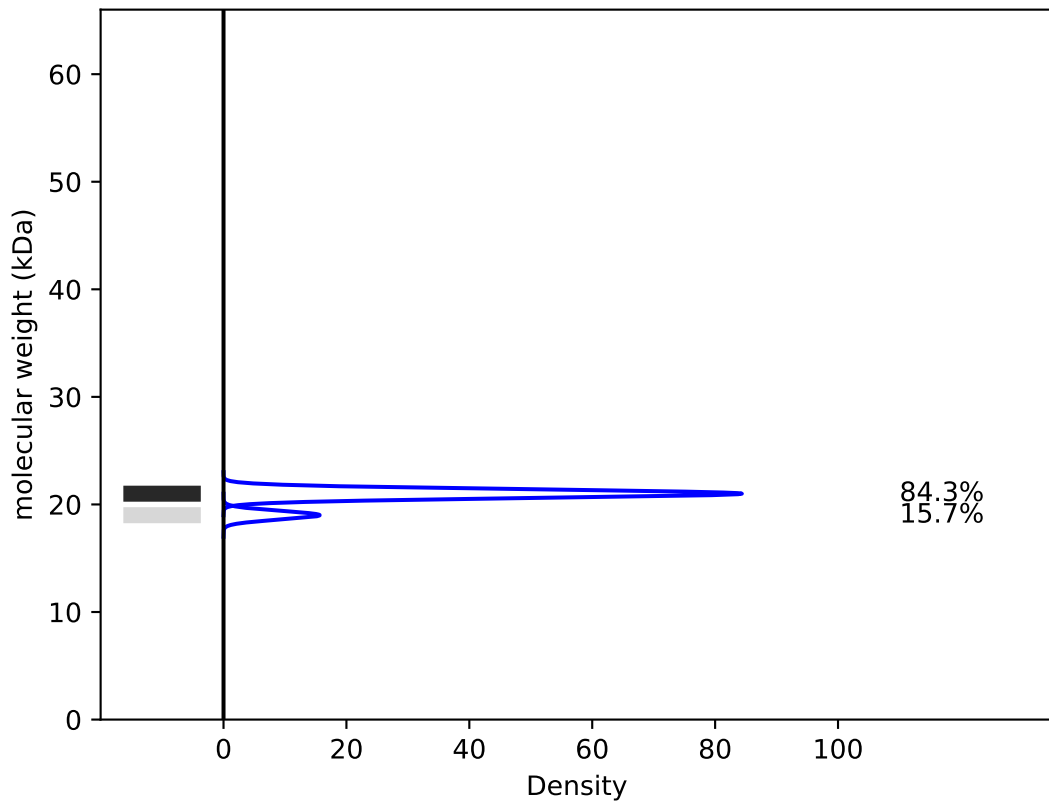

P49755





# P49770

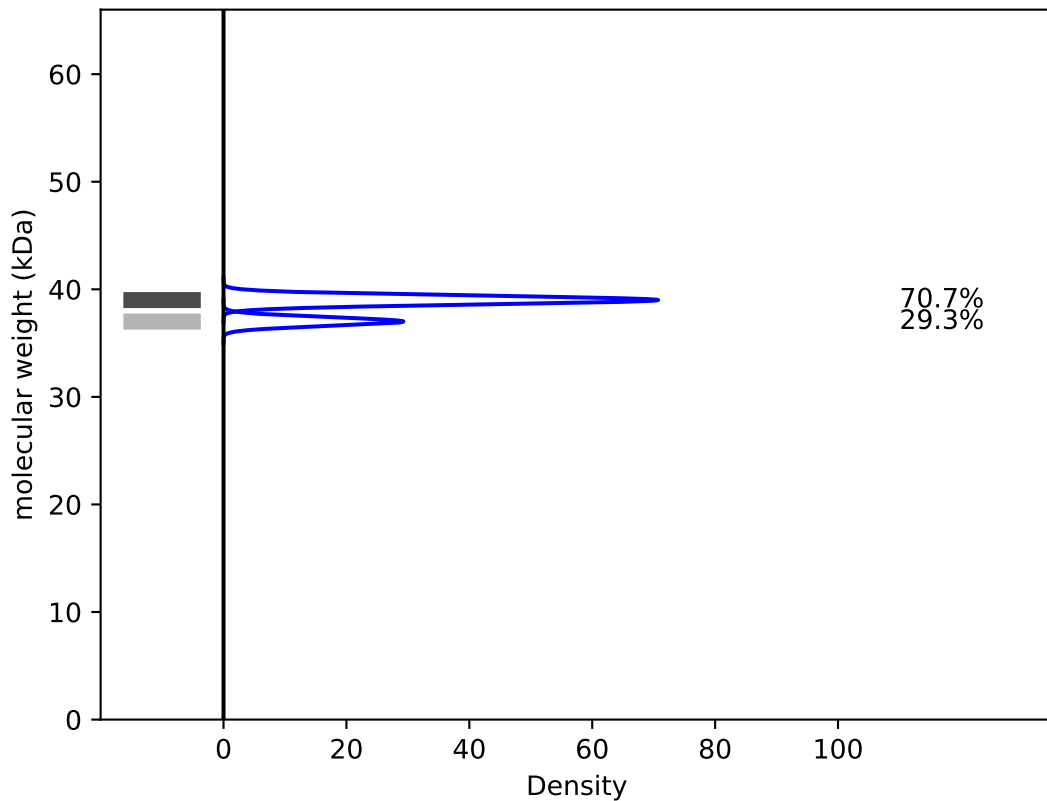

# P50213

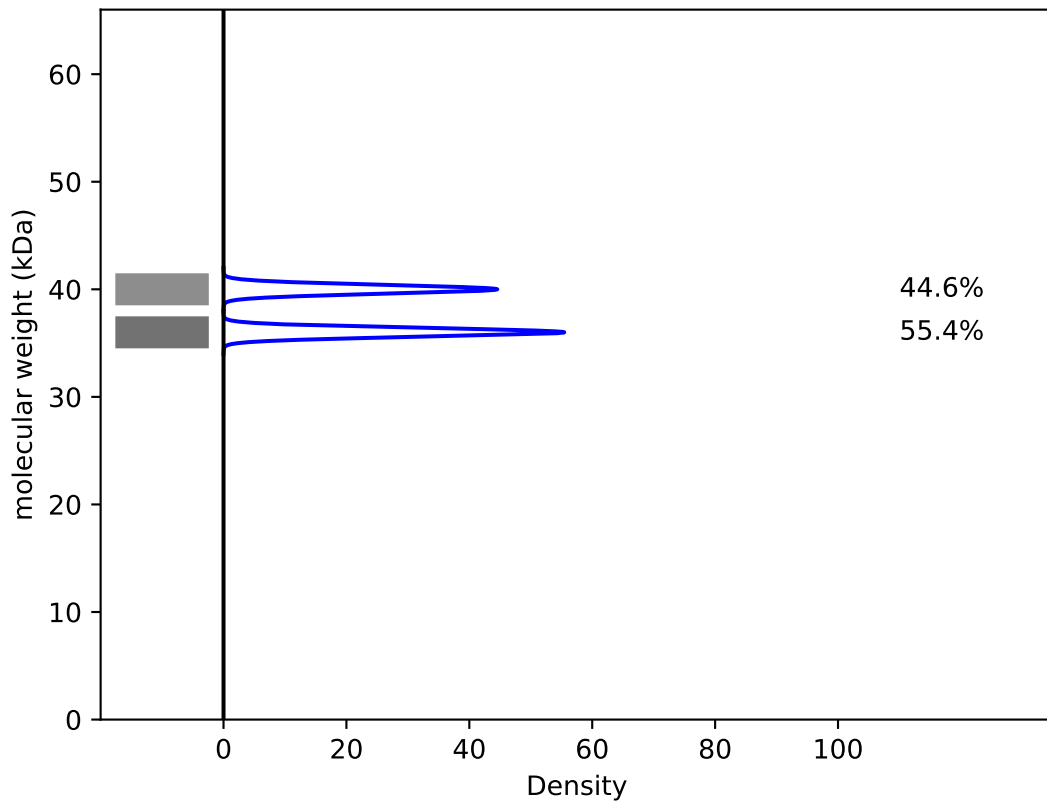

# P50395

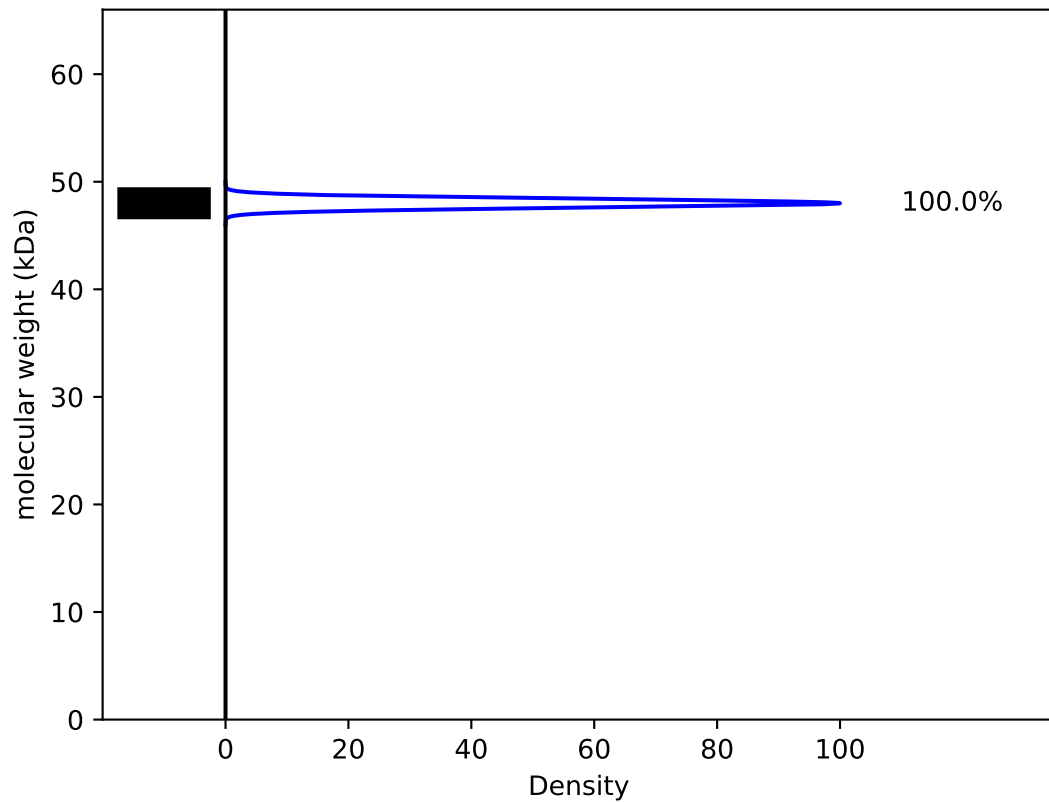

# P31150

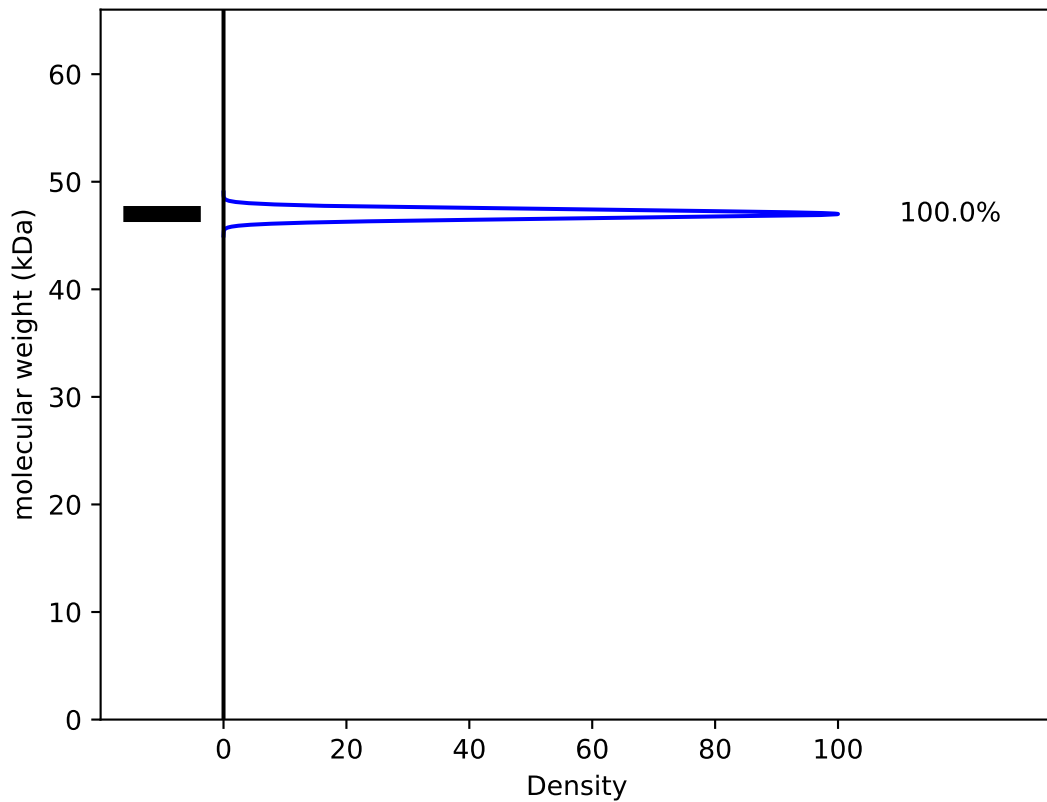

P50402



P50454



# P50502



# Q8NFI4

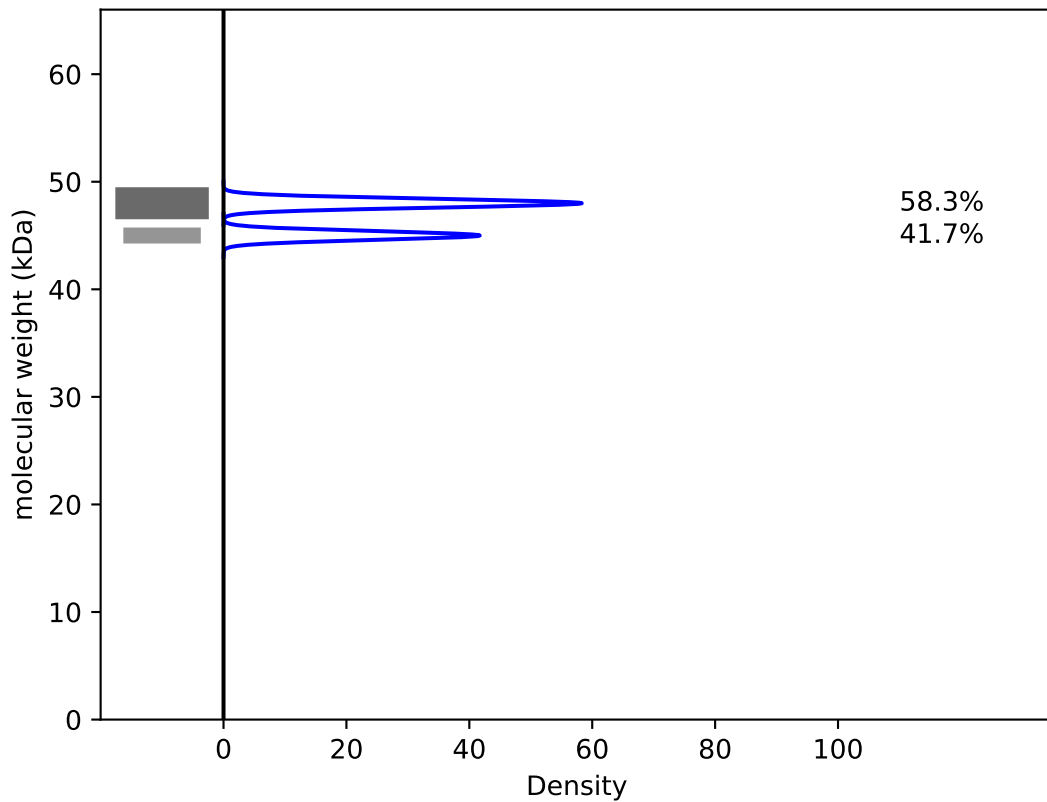



# P50579

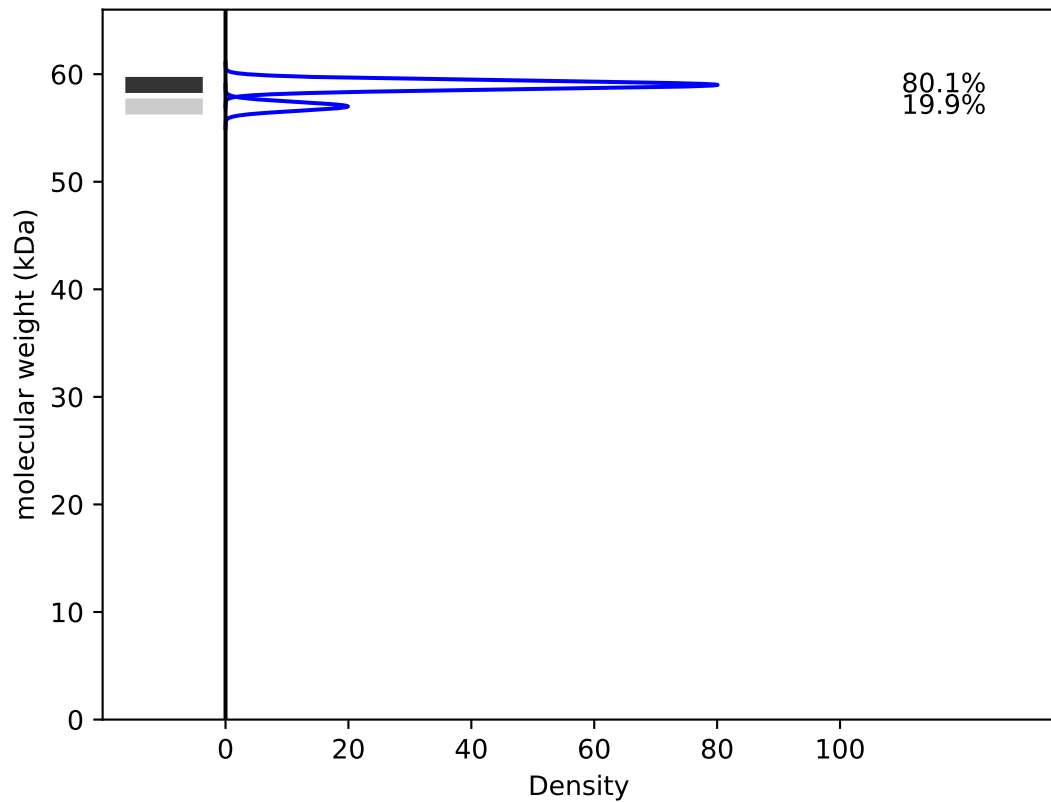

P50897

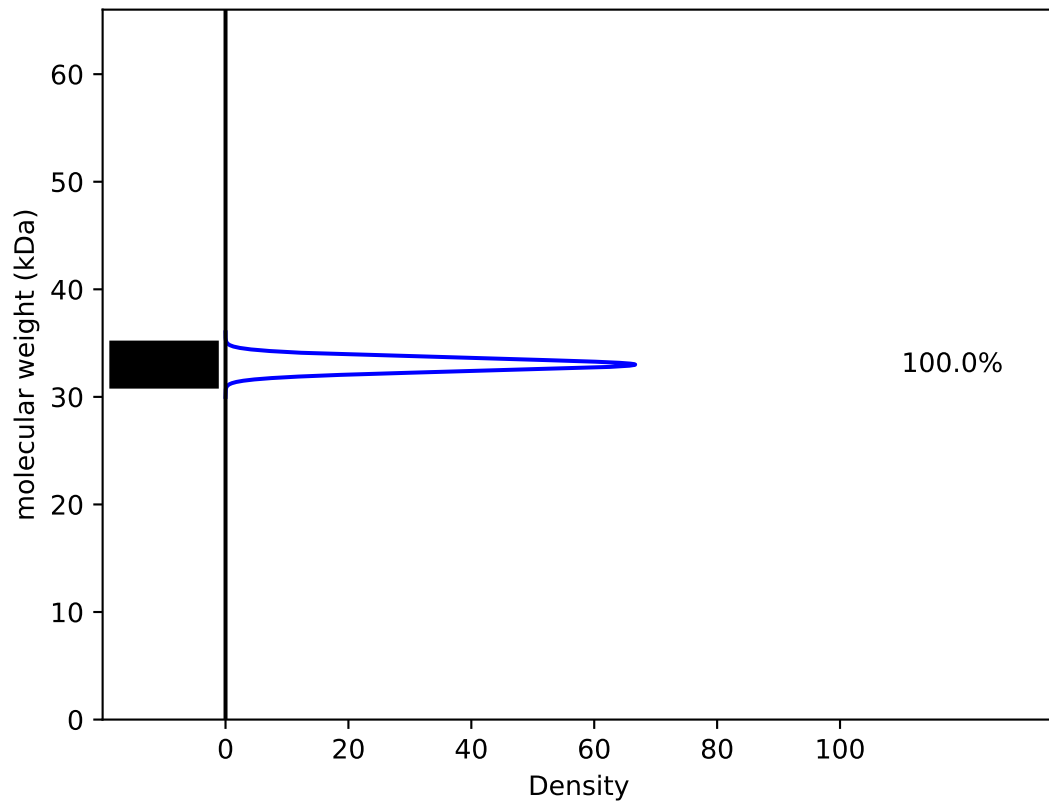

# P50914



# P50990



# P50991



# P51148

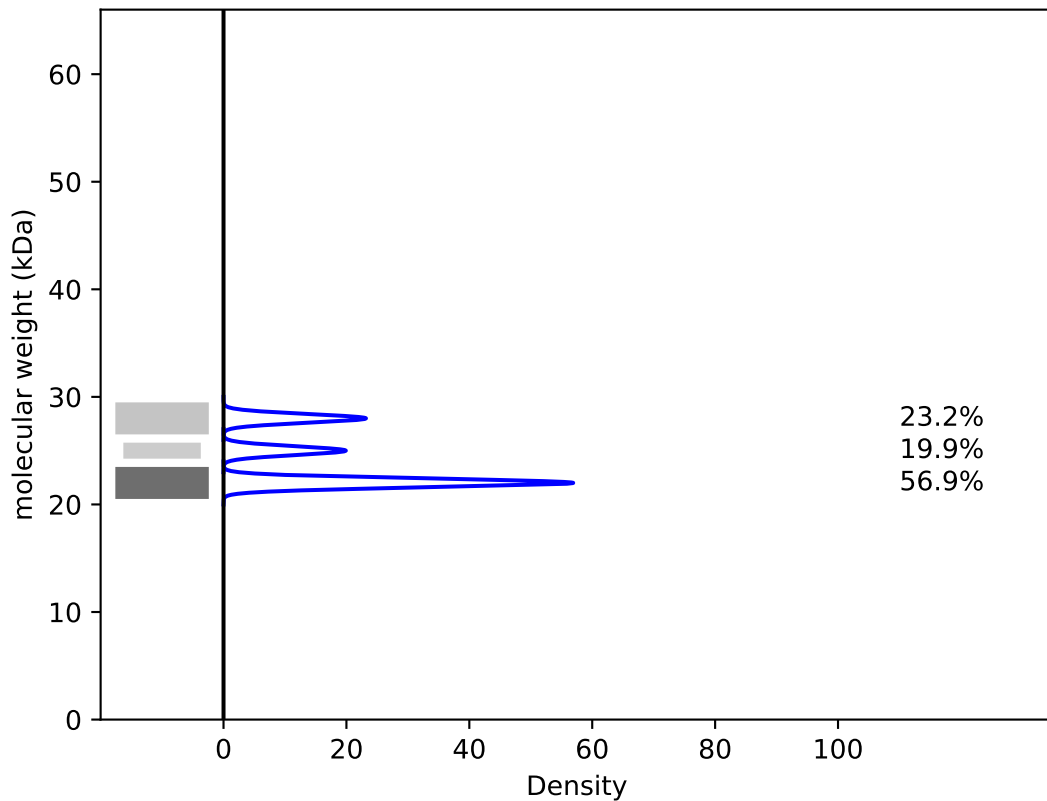

# P51149

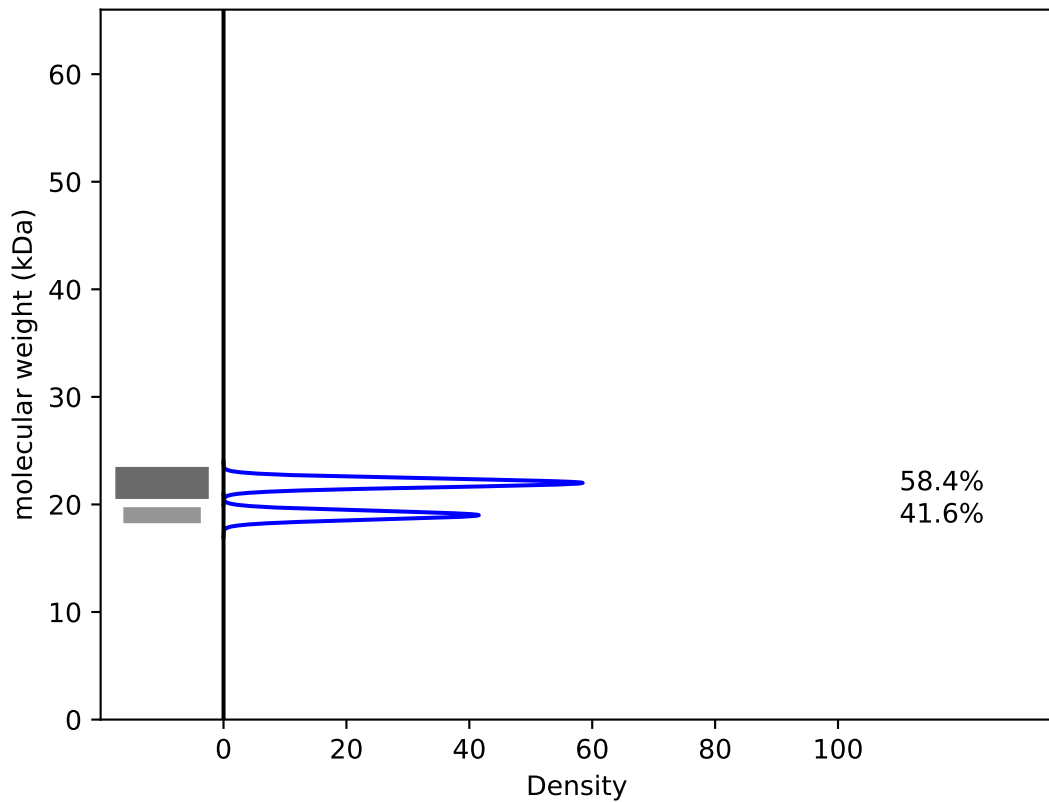

# P51151

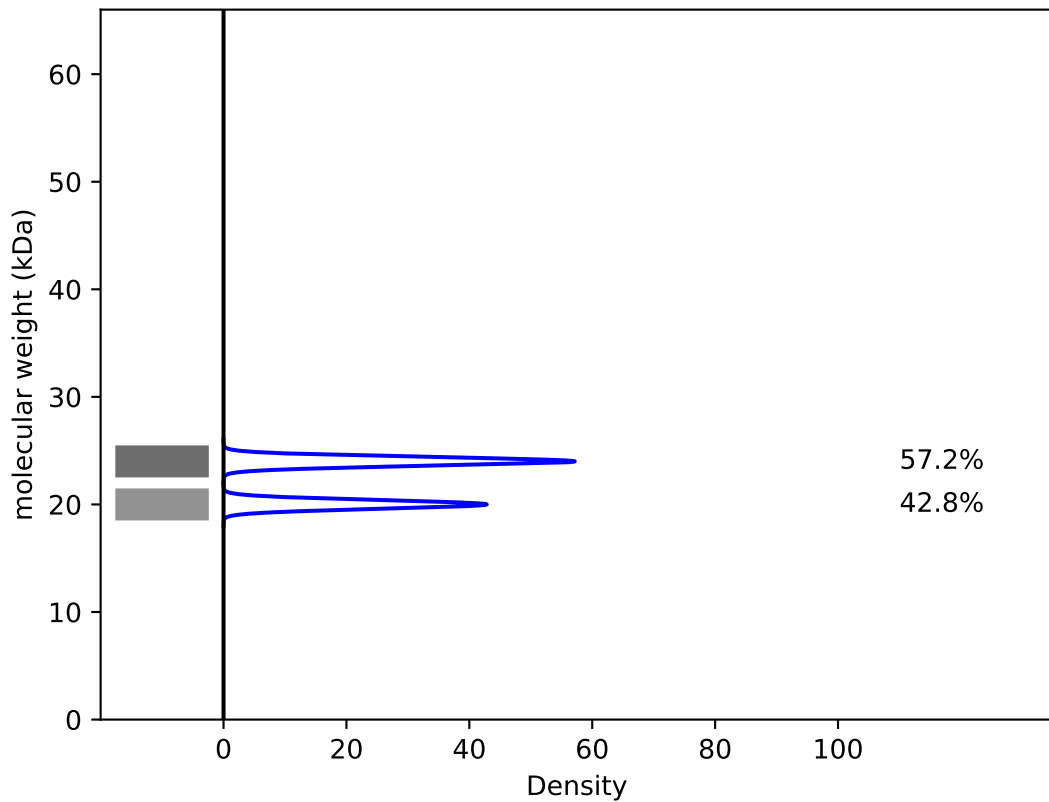



# Q9NP90

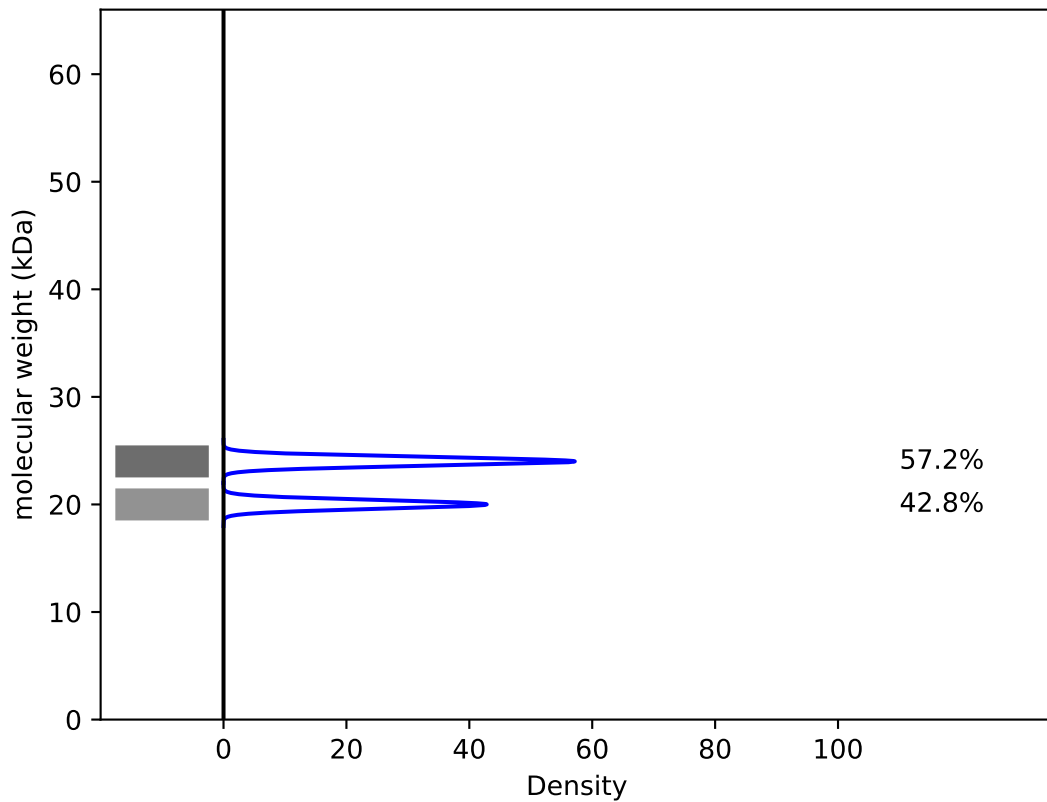

# P51153

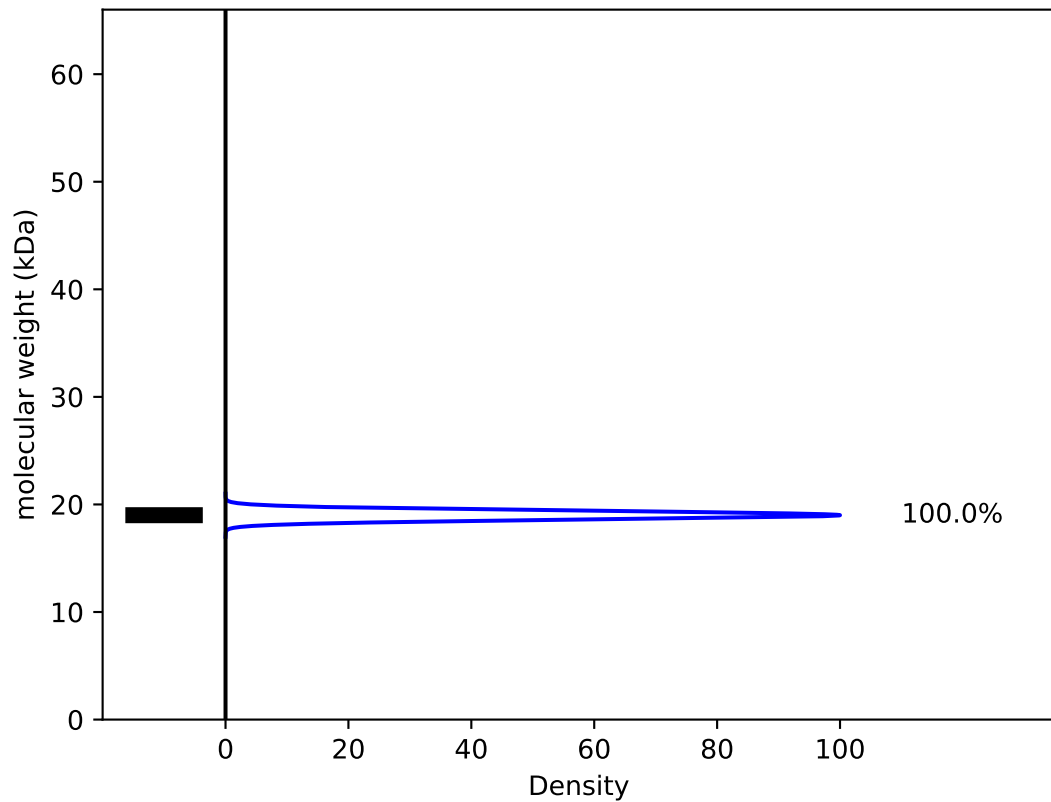

# P51398



# P51452



# P51553



# P51571

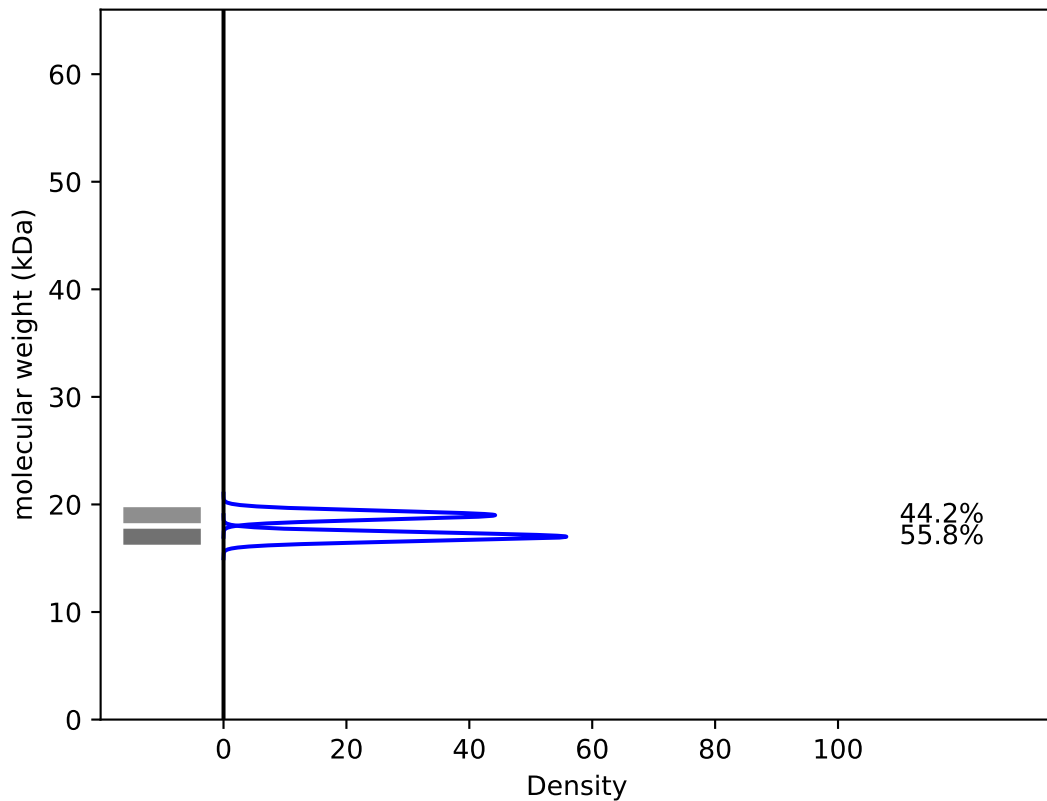

# P51572



P48448





P30838

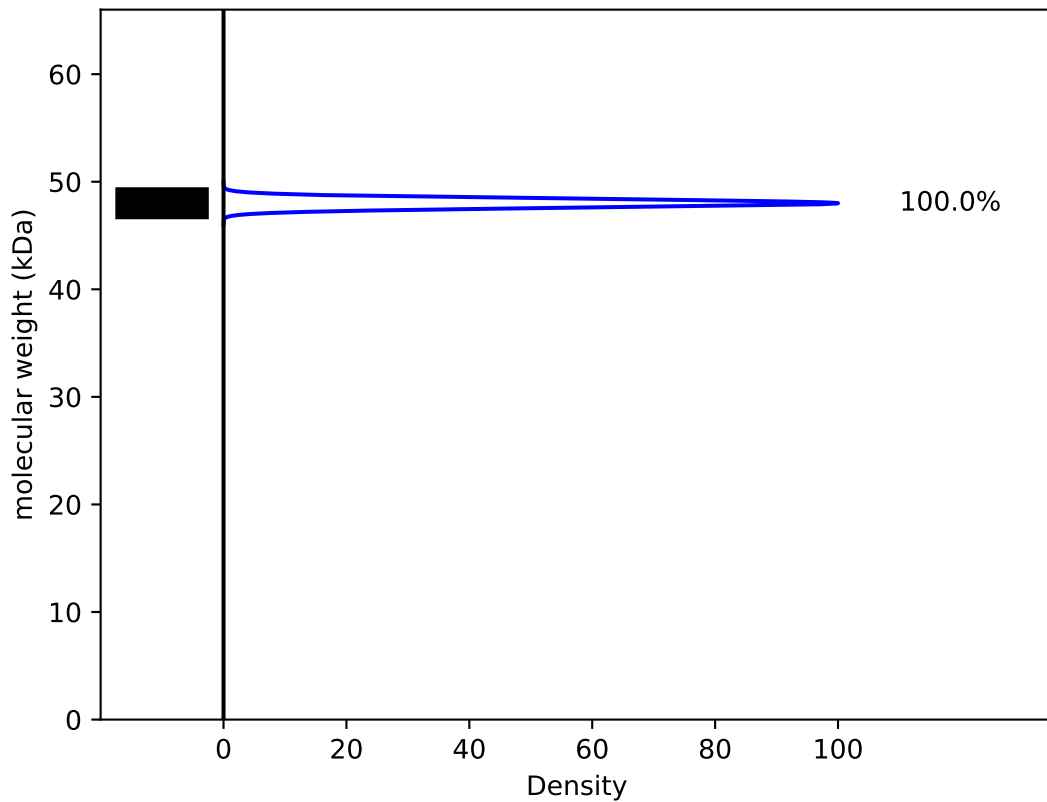

P43353



# P51665

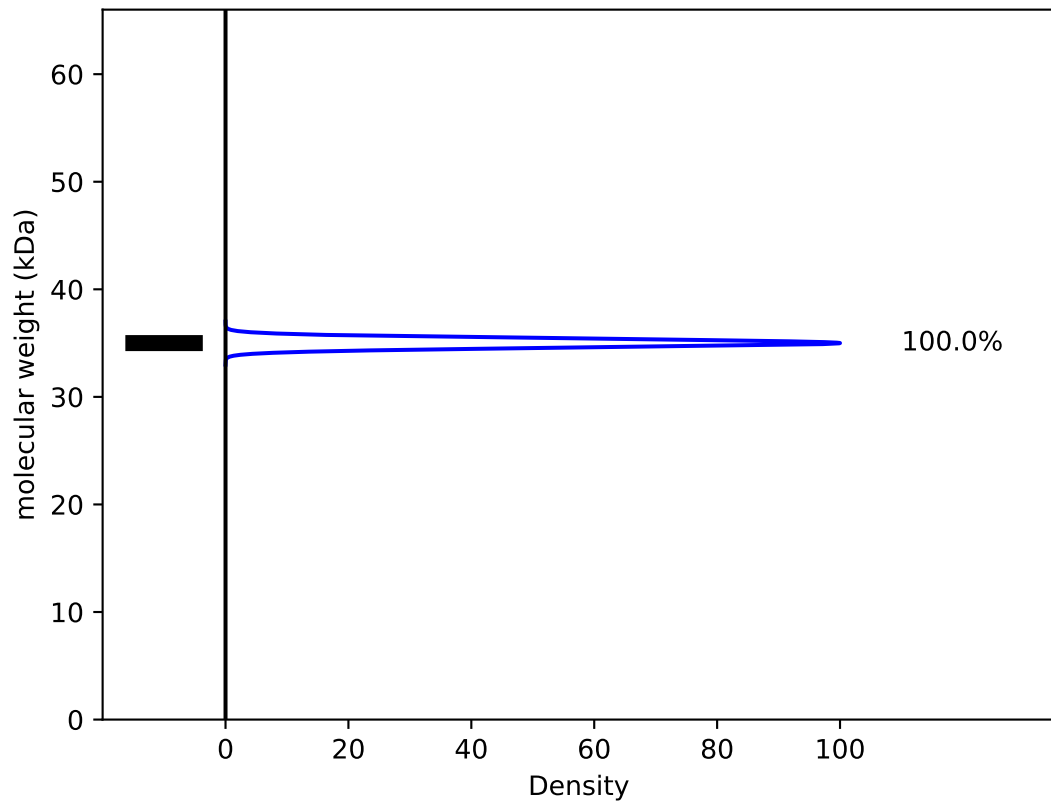

# P51991

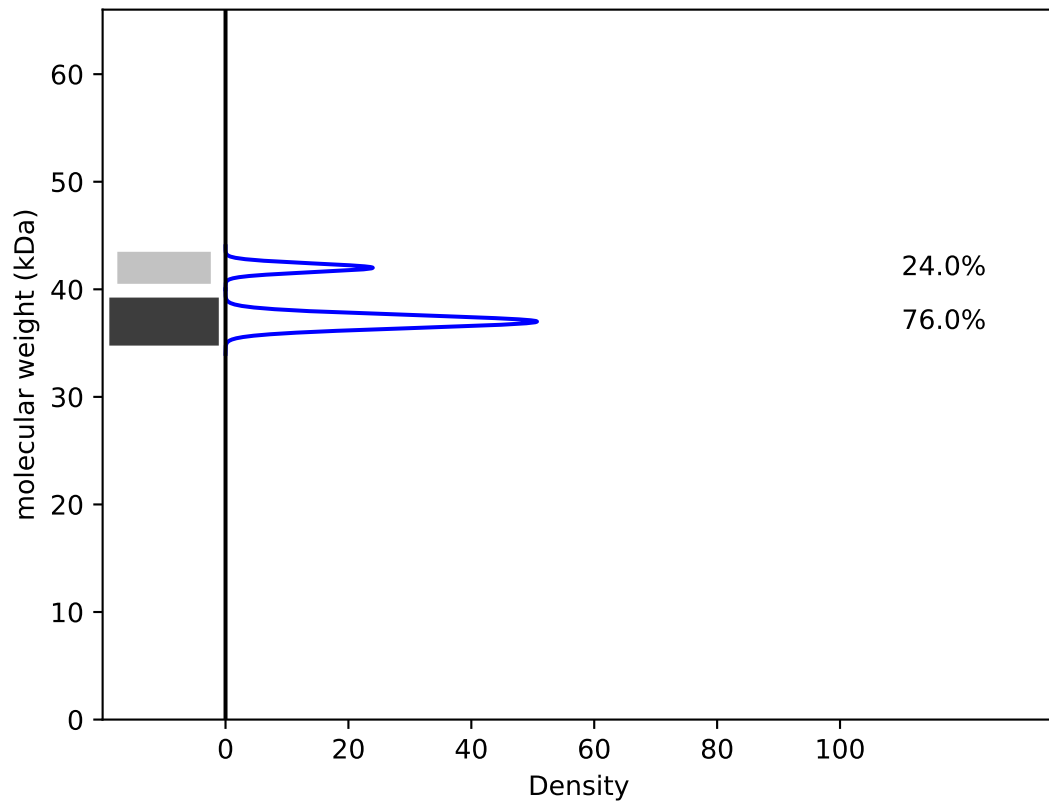

# P52209



P52292

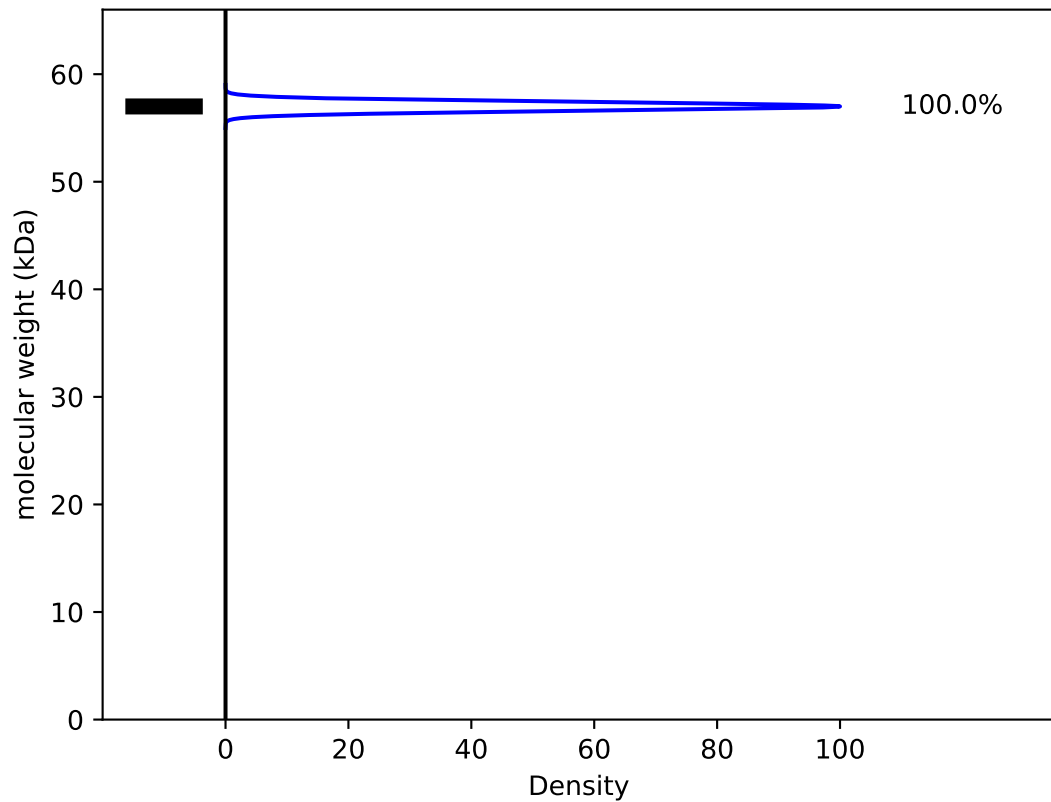

# P52565



# P52597

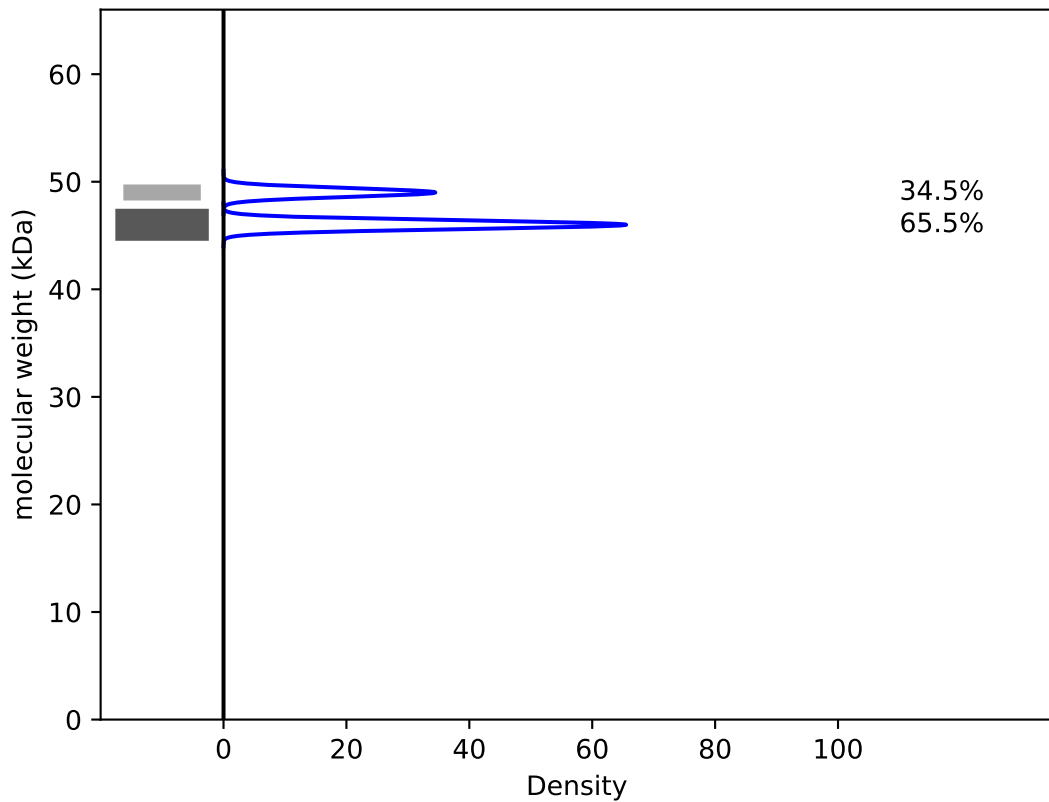



# P52788



# P52815



# P52907

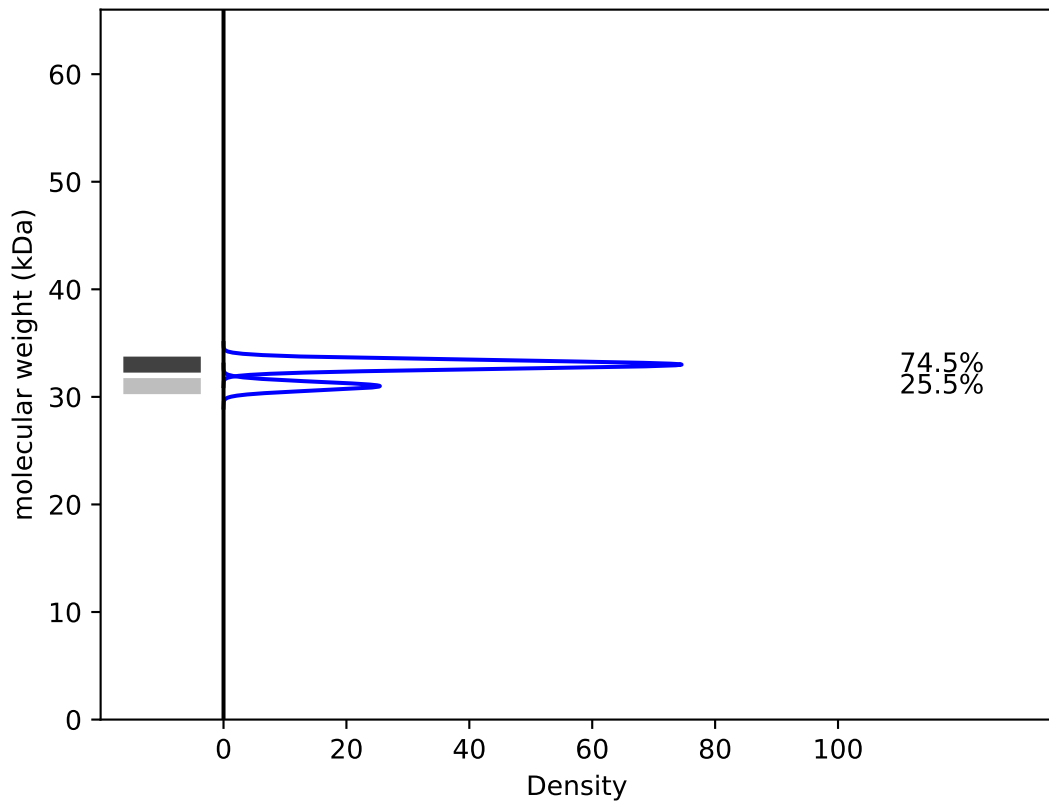

# P53004

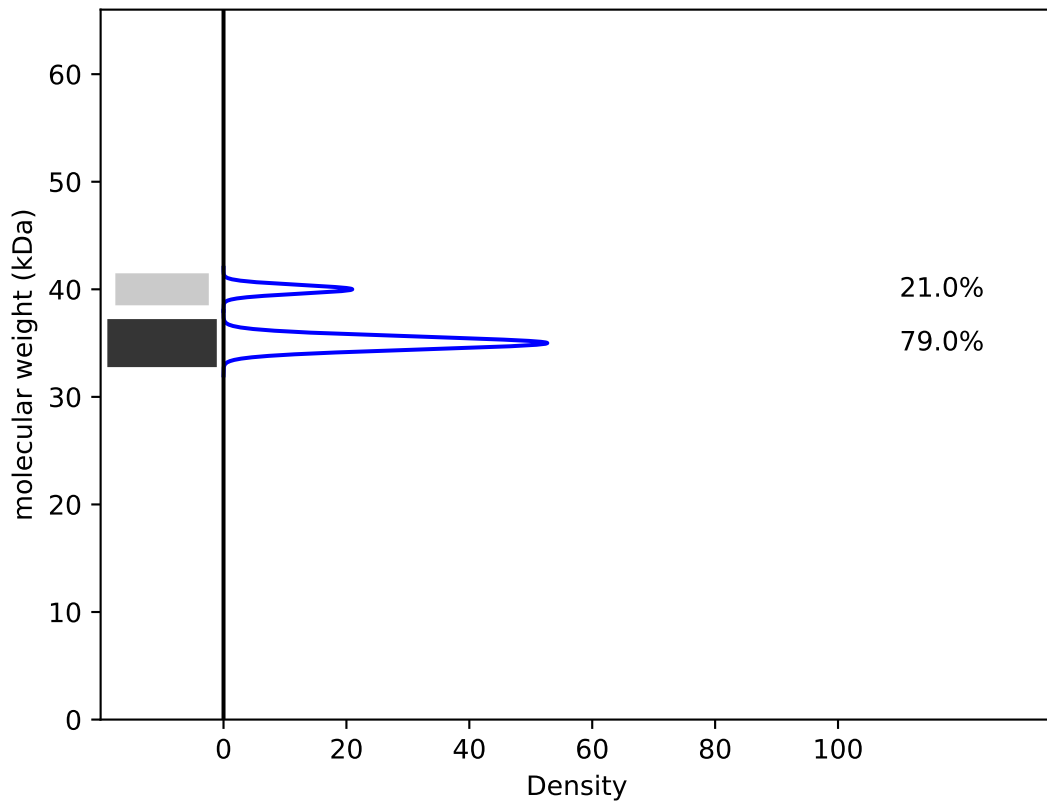

# P53007

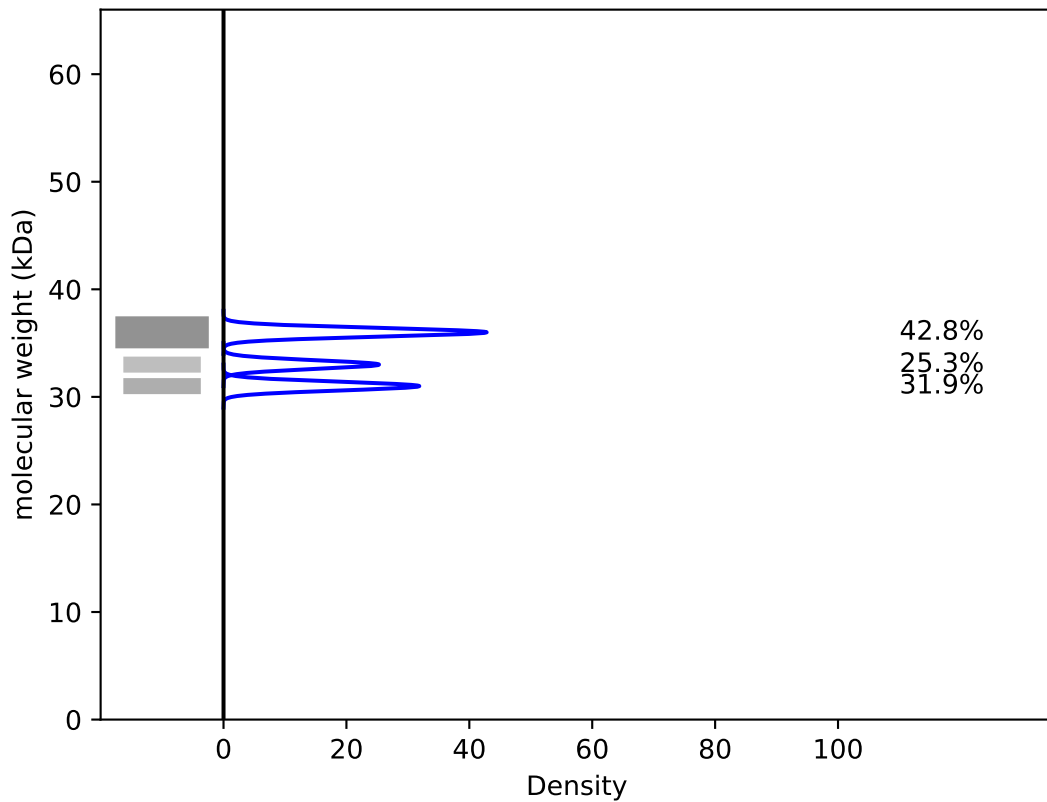

# P53367

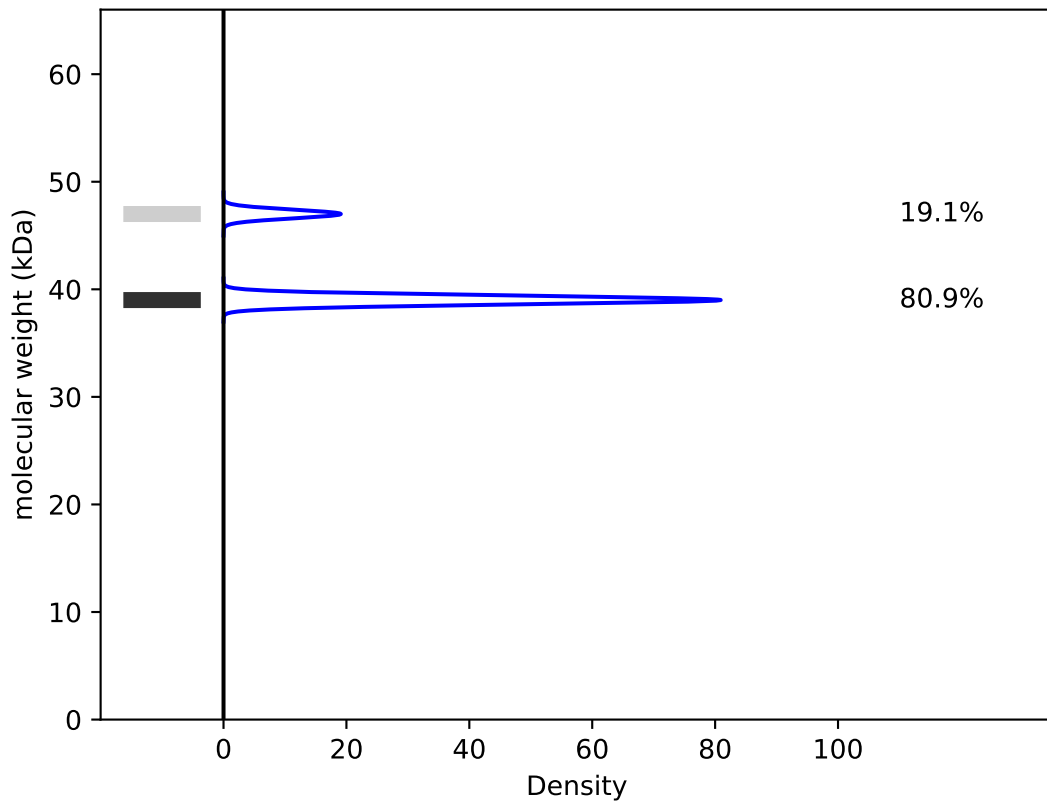

P53701



# P54577





# P54578



# P54619

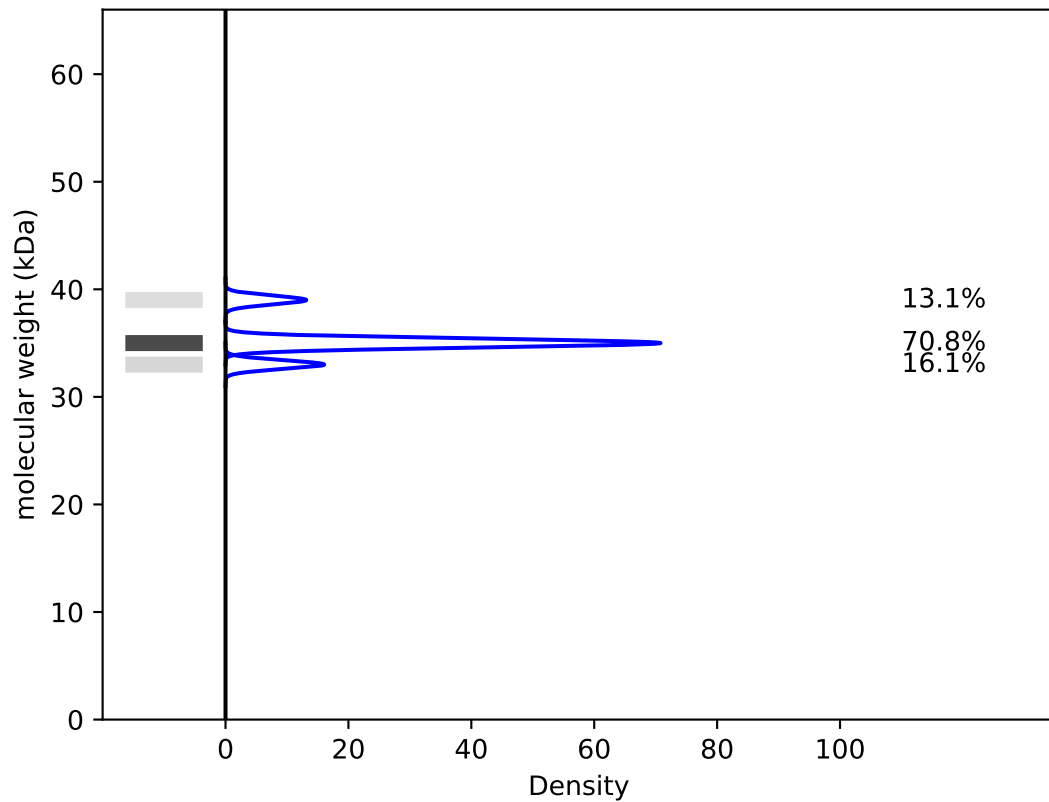

# P54709

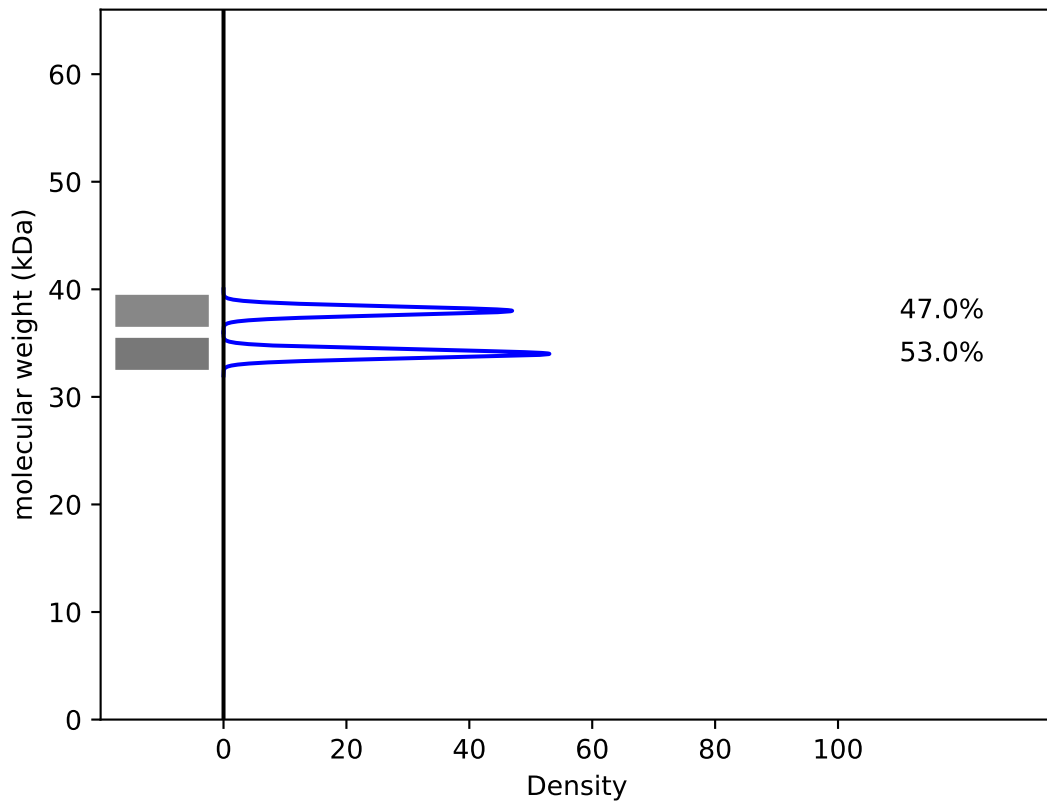

# P54819



P54920



# Q9H115



# P55010

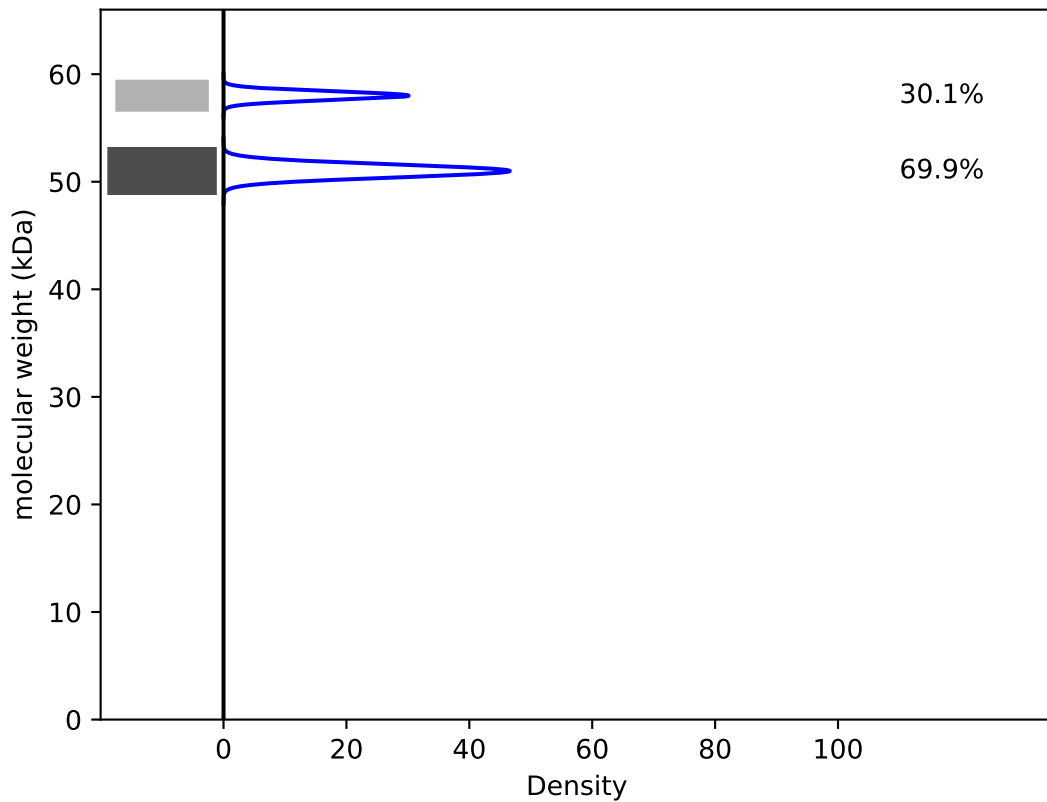

# P55039

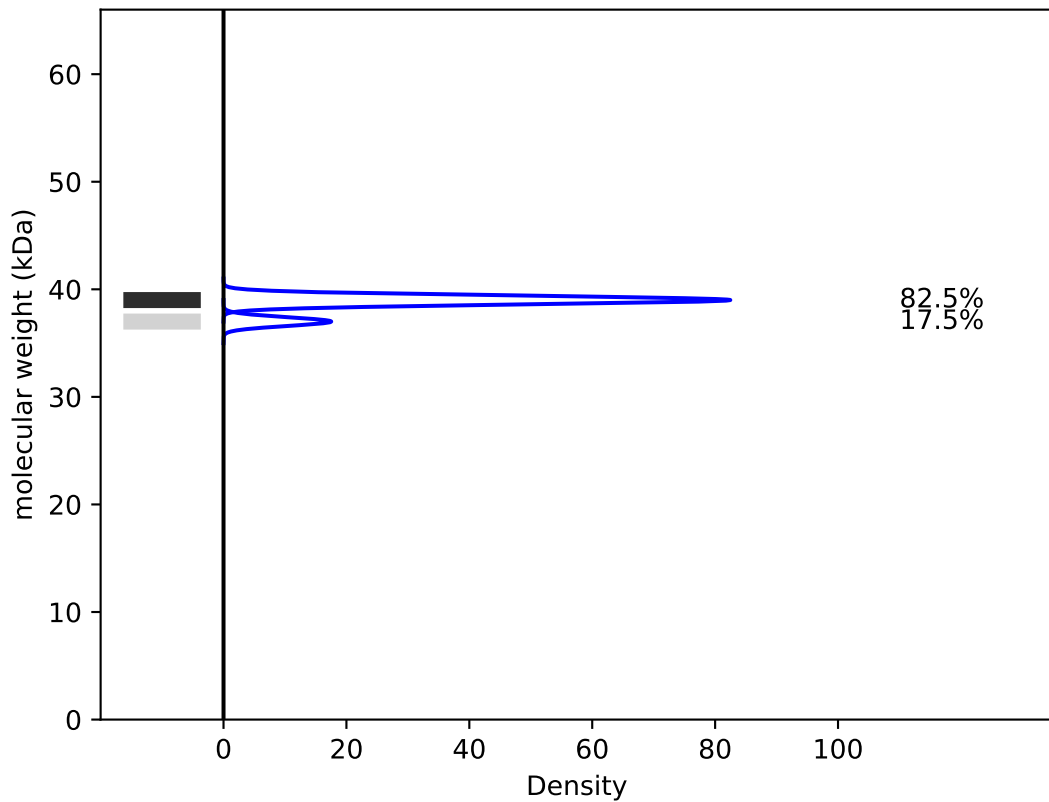



P55084



P55209



# P55263

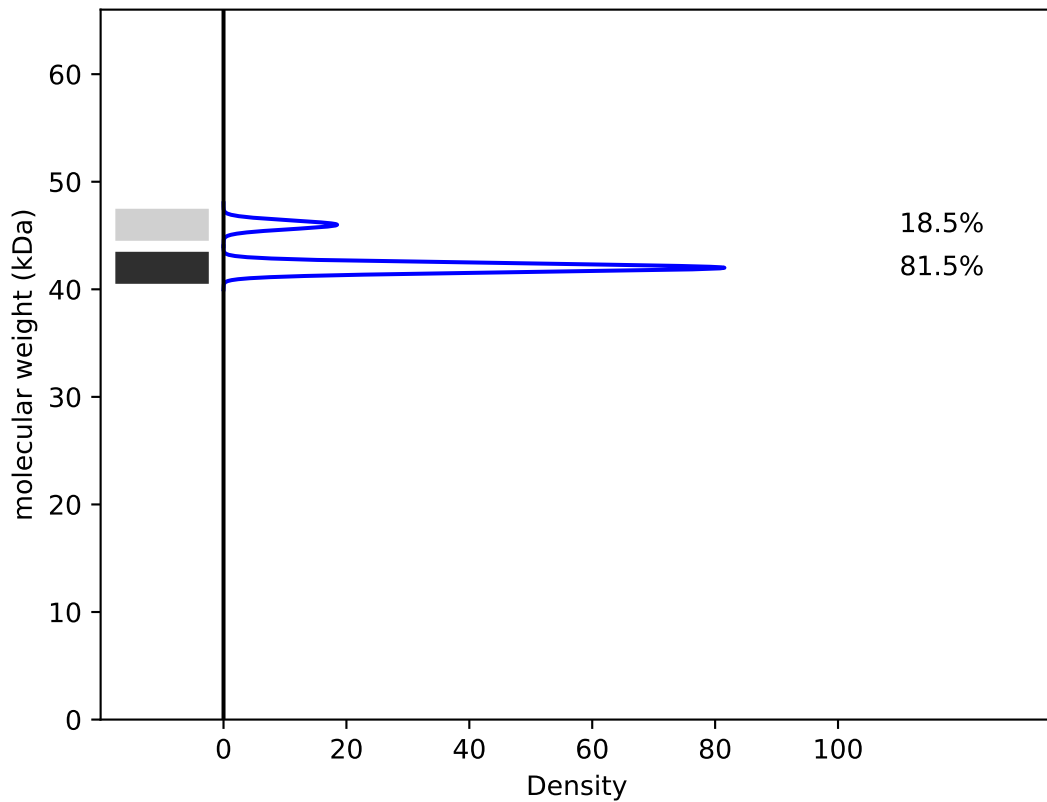

P55327



P55735



# P56537



P56545

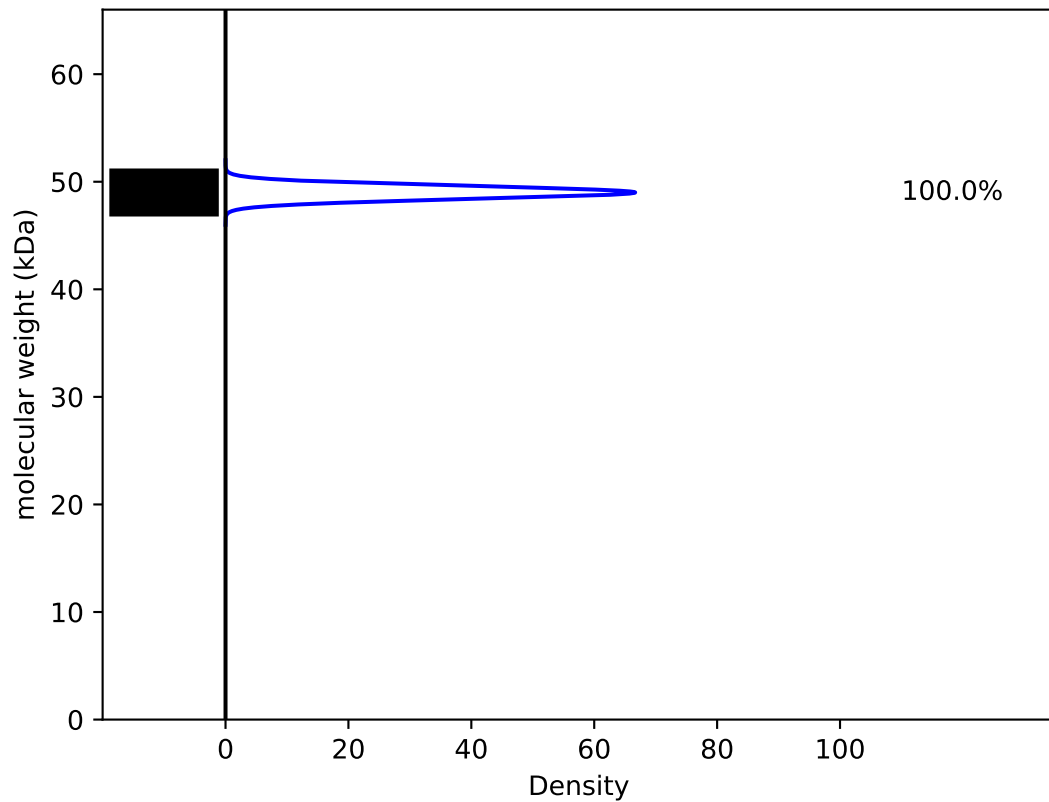

# P56937





# P57088

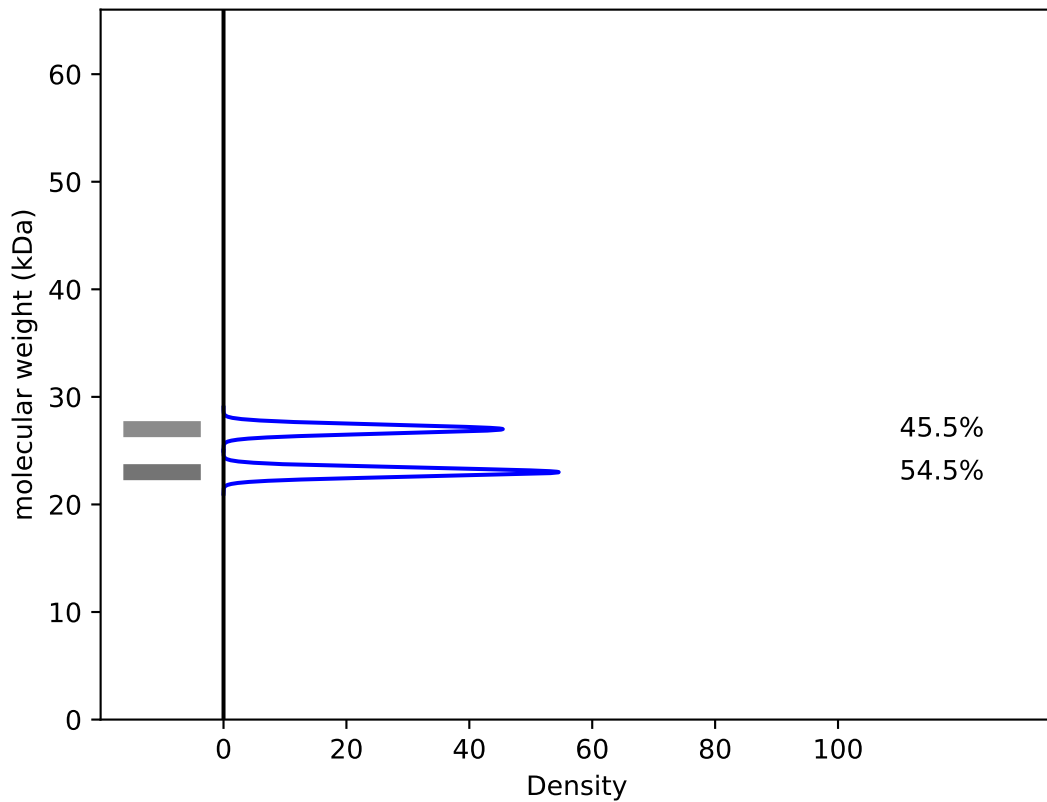

# P59780



# P59998

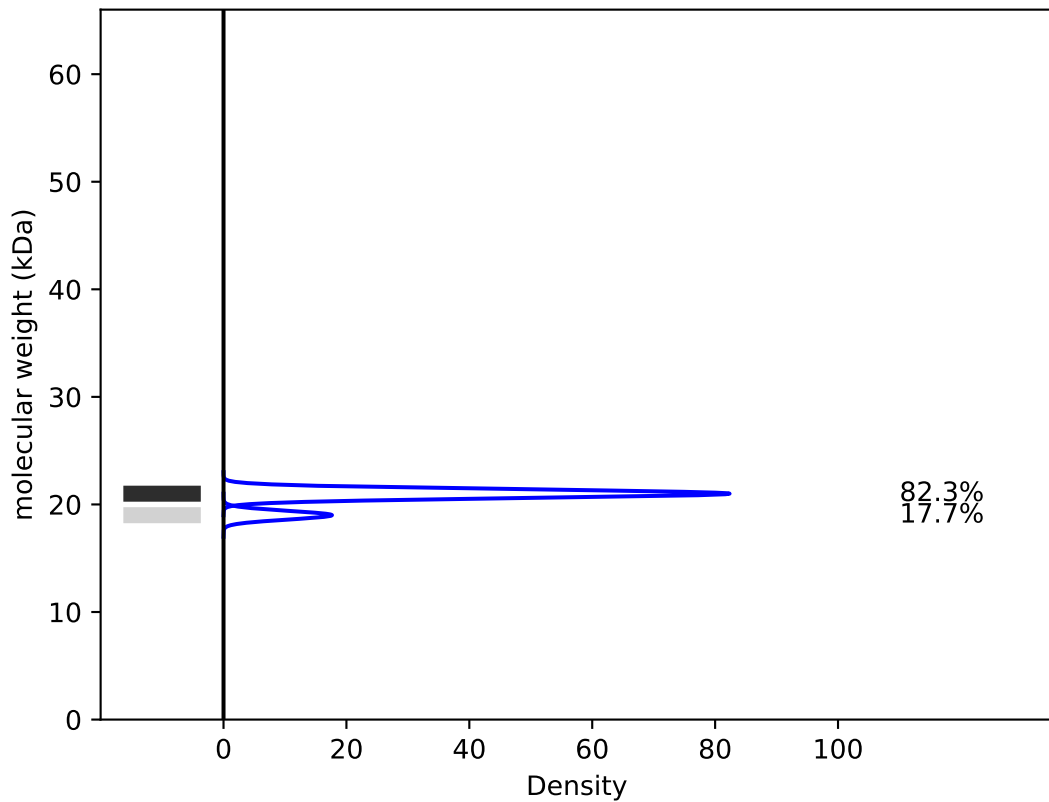

# P60228



# P60510



# P60709

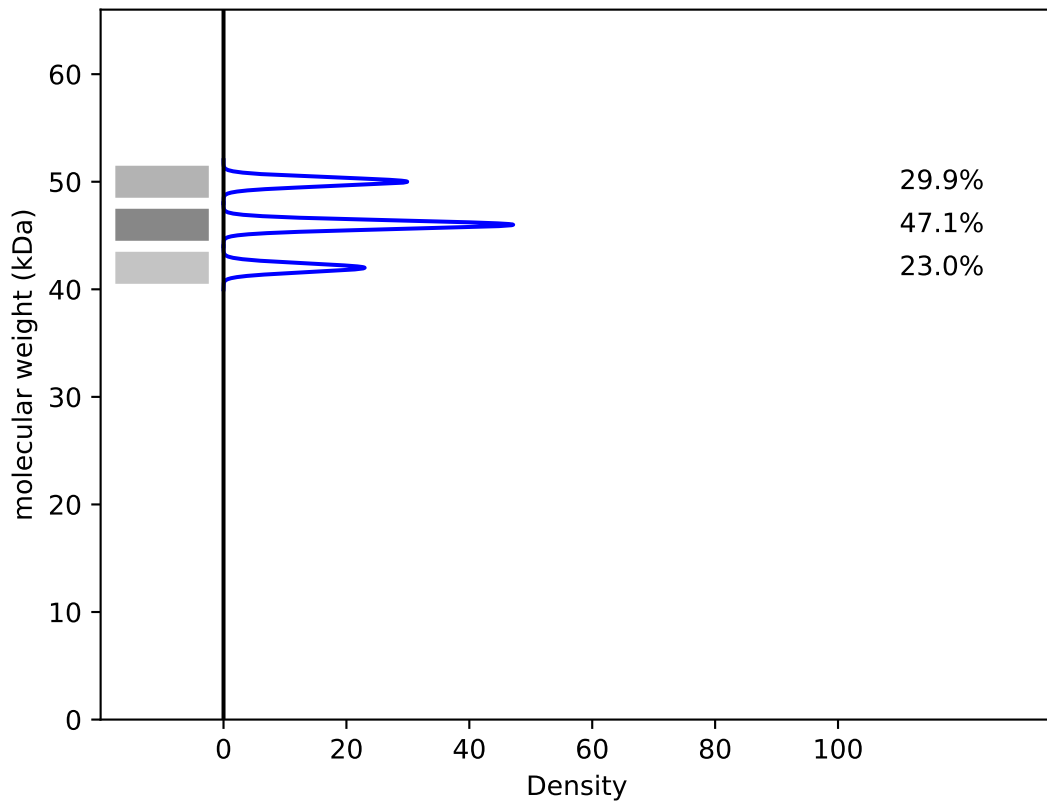

# Q9BYX7

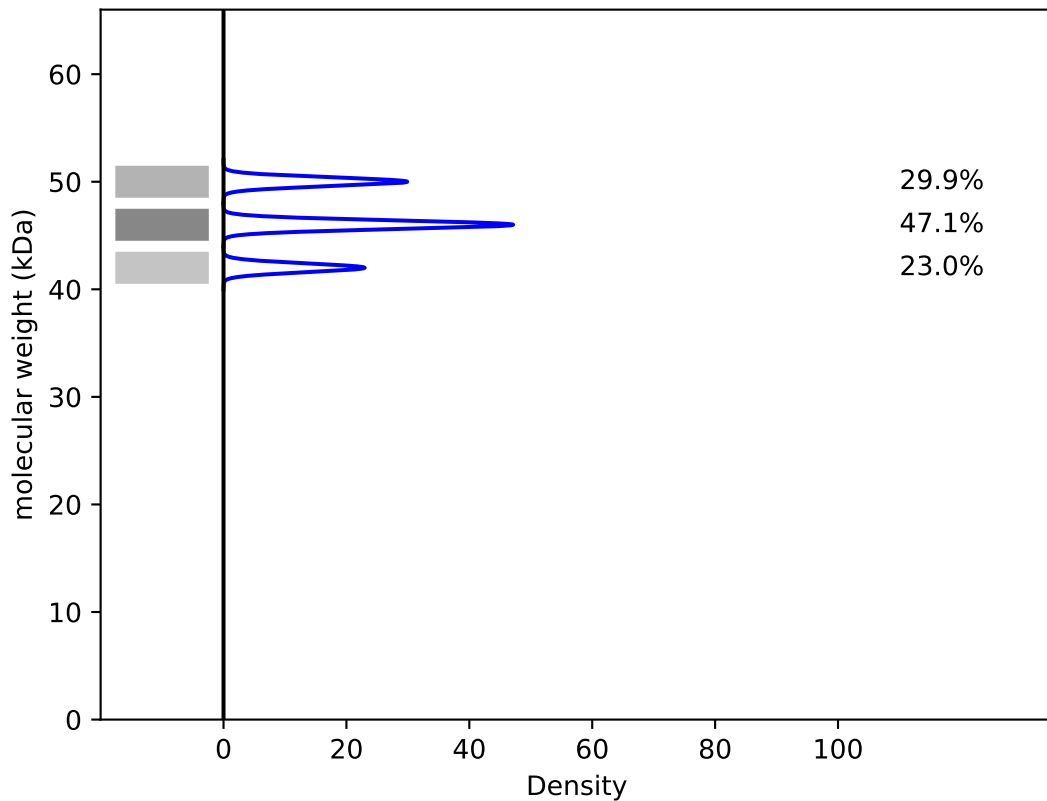

P60842





# Q14240

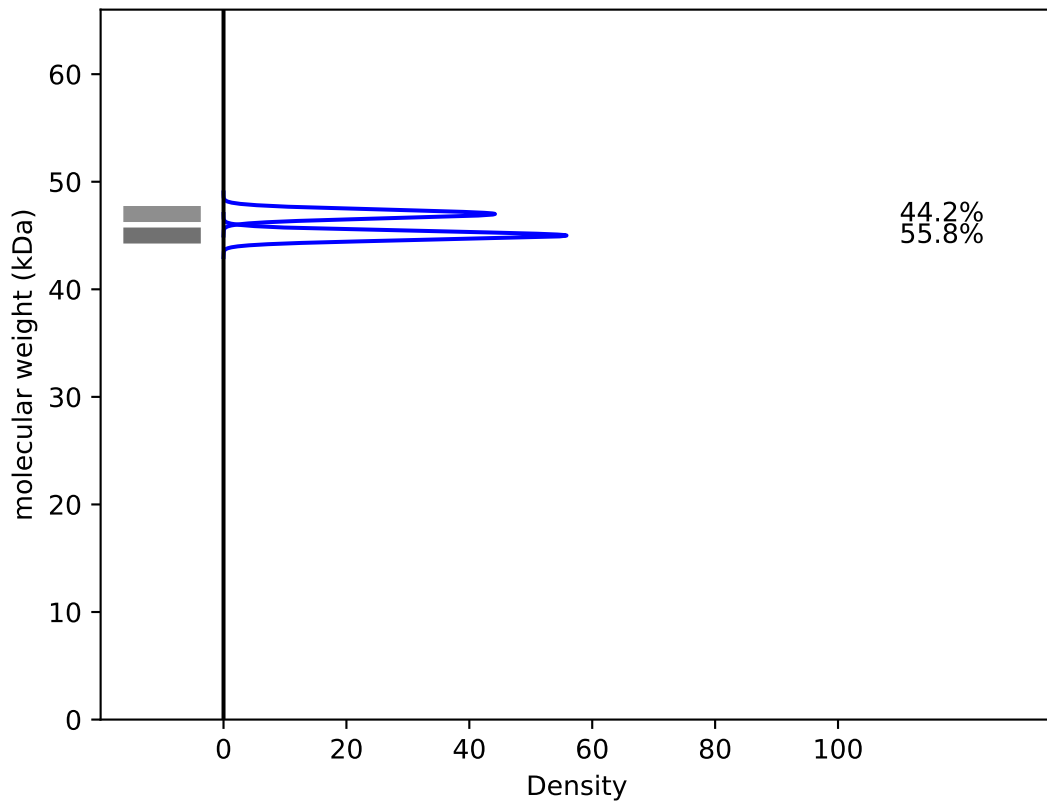

# P60866

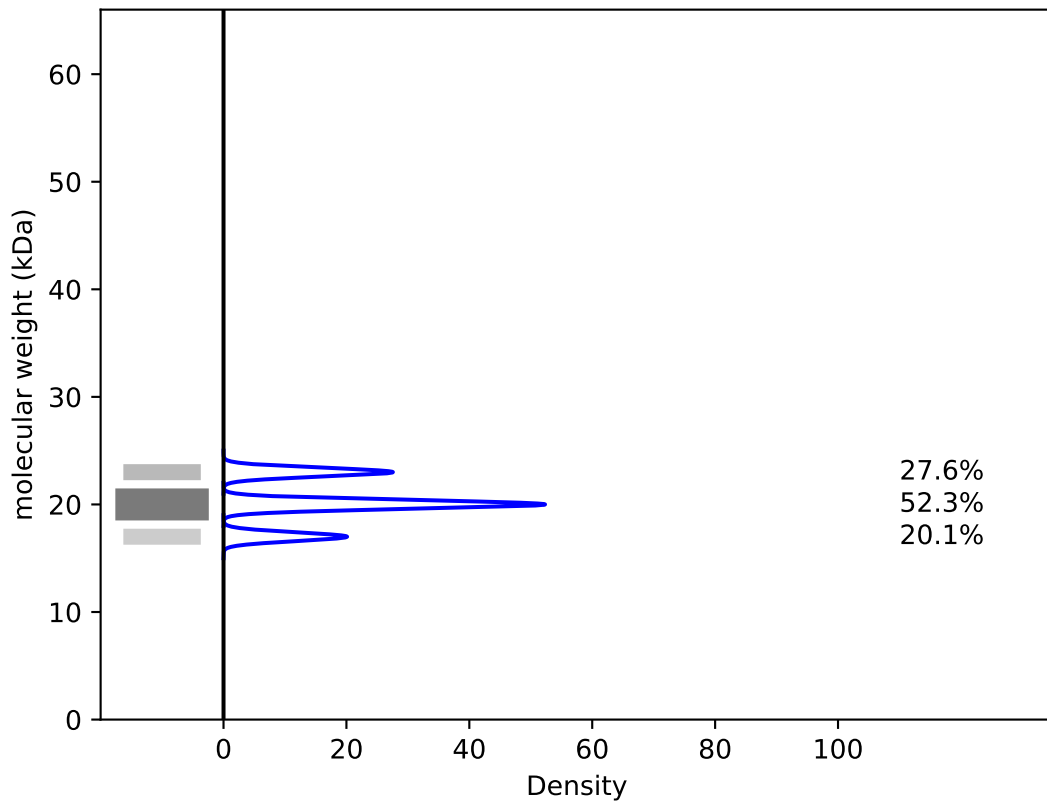

# P60891

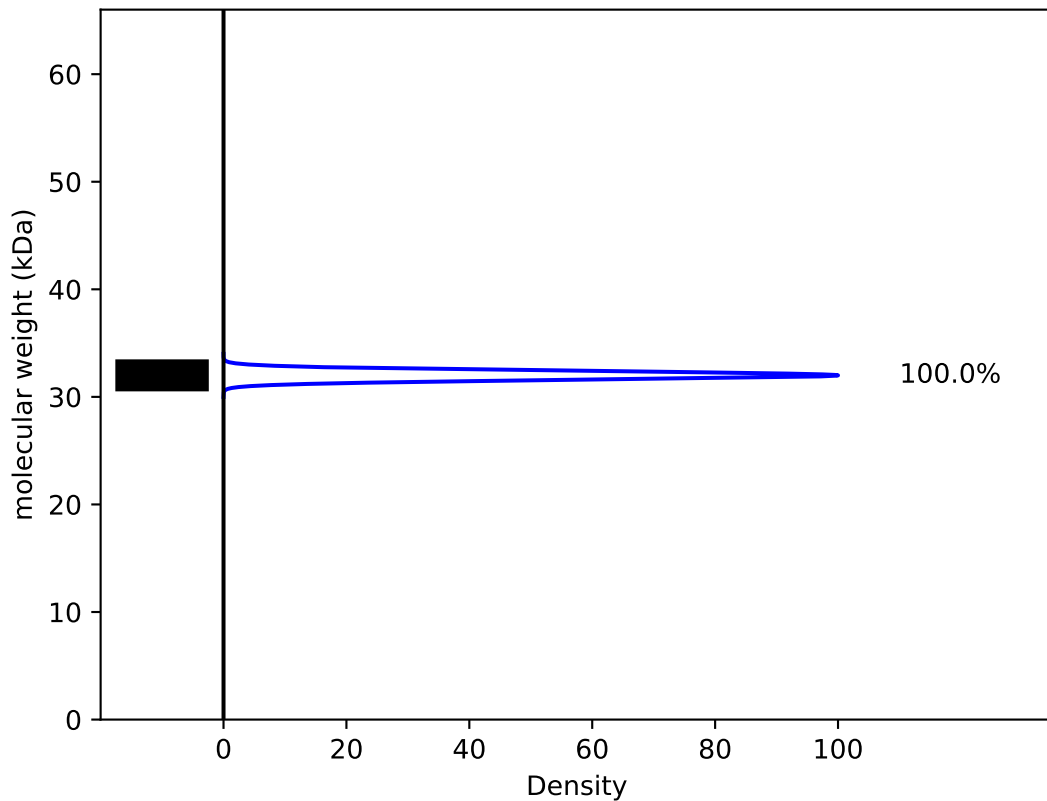

# P60900



# P60953

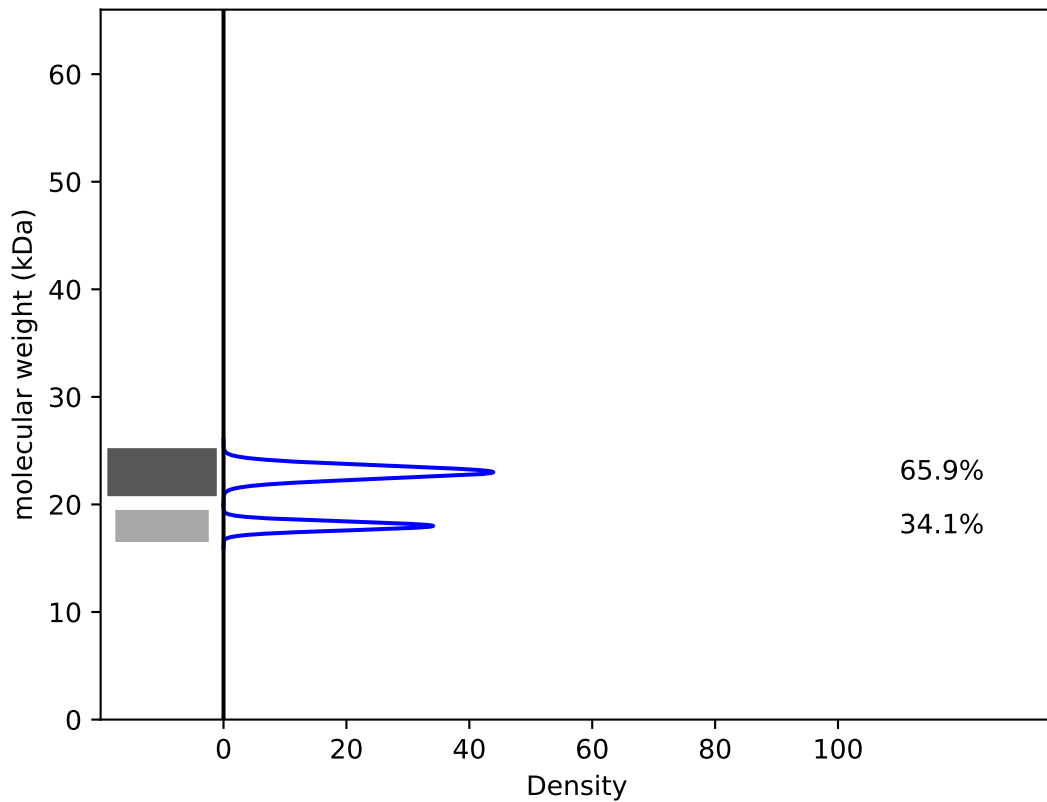

# P17081

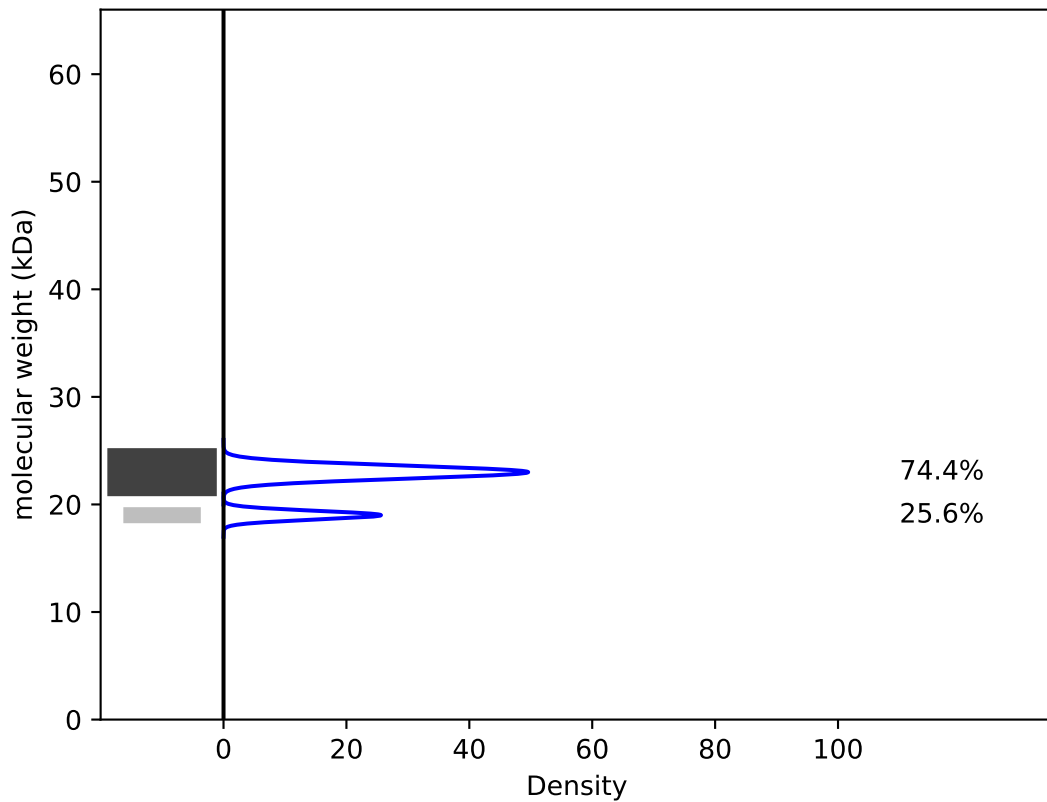

# Q9H4E5

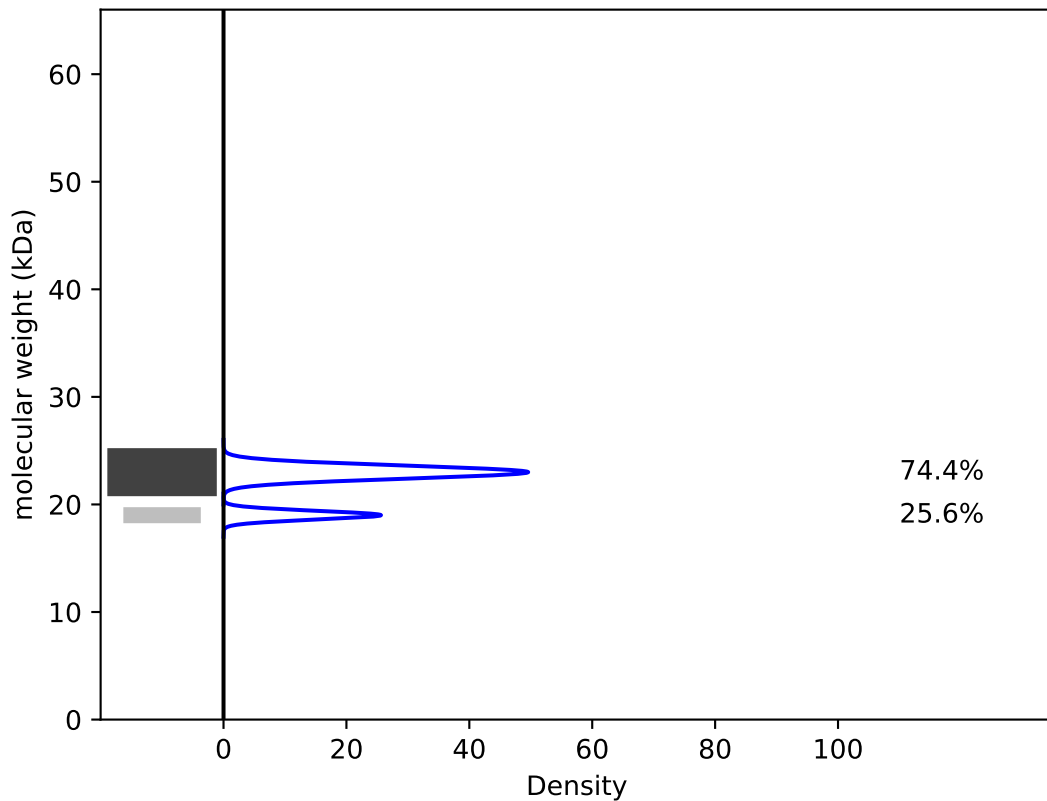

# P60981

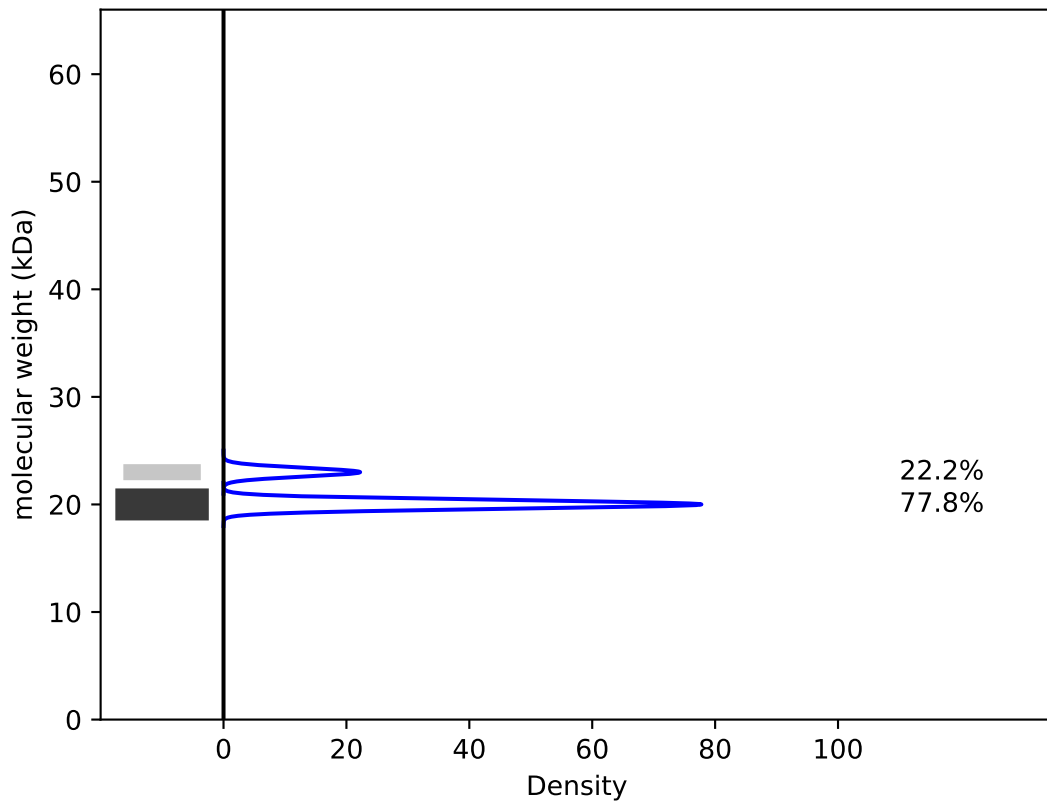



# P61006

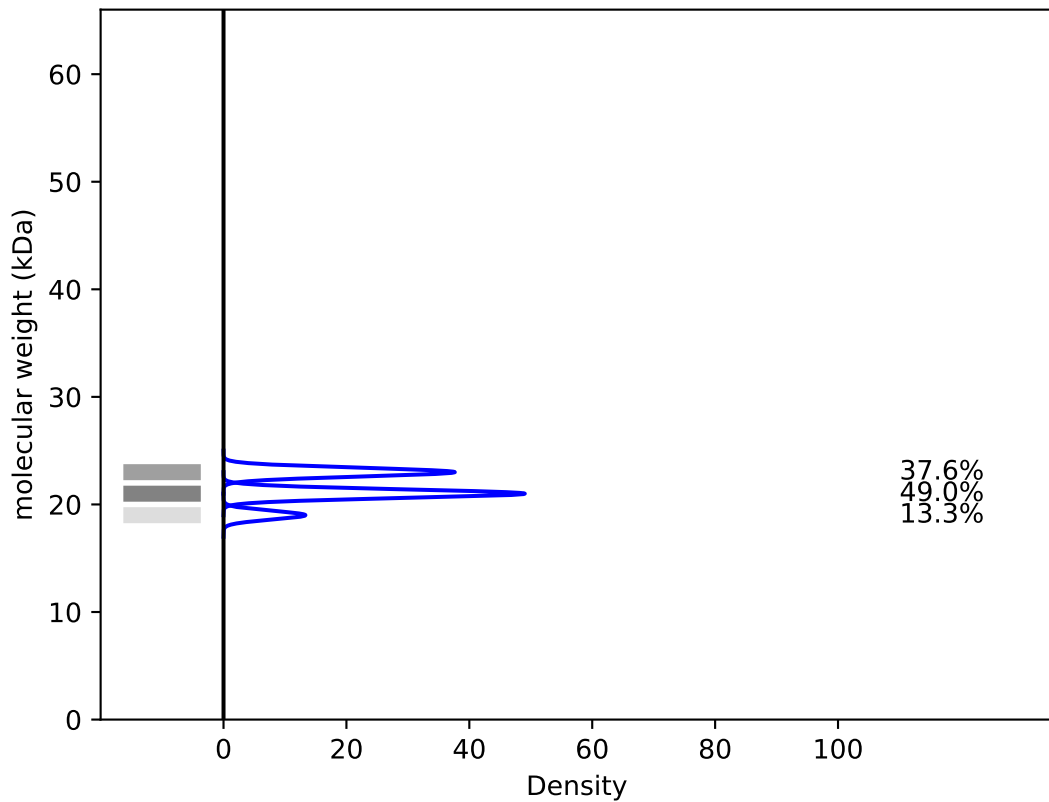

# Q92930

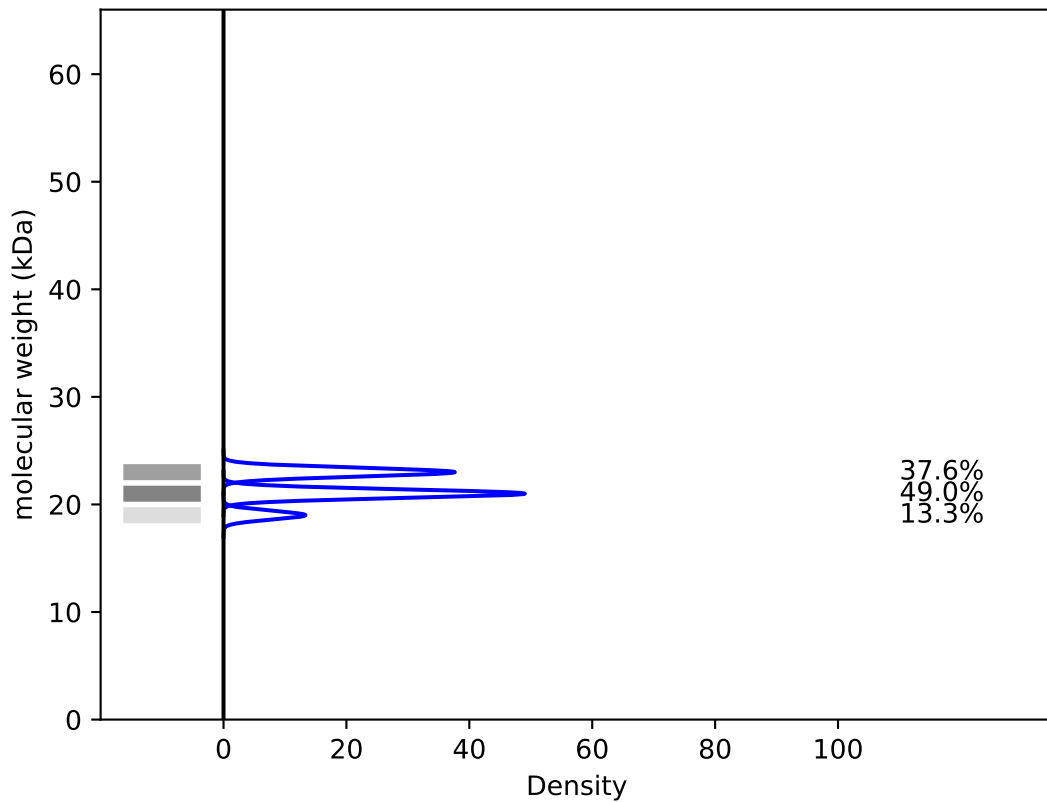

# P61009

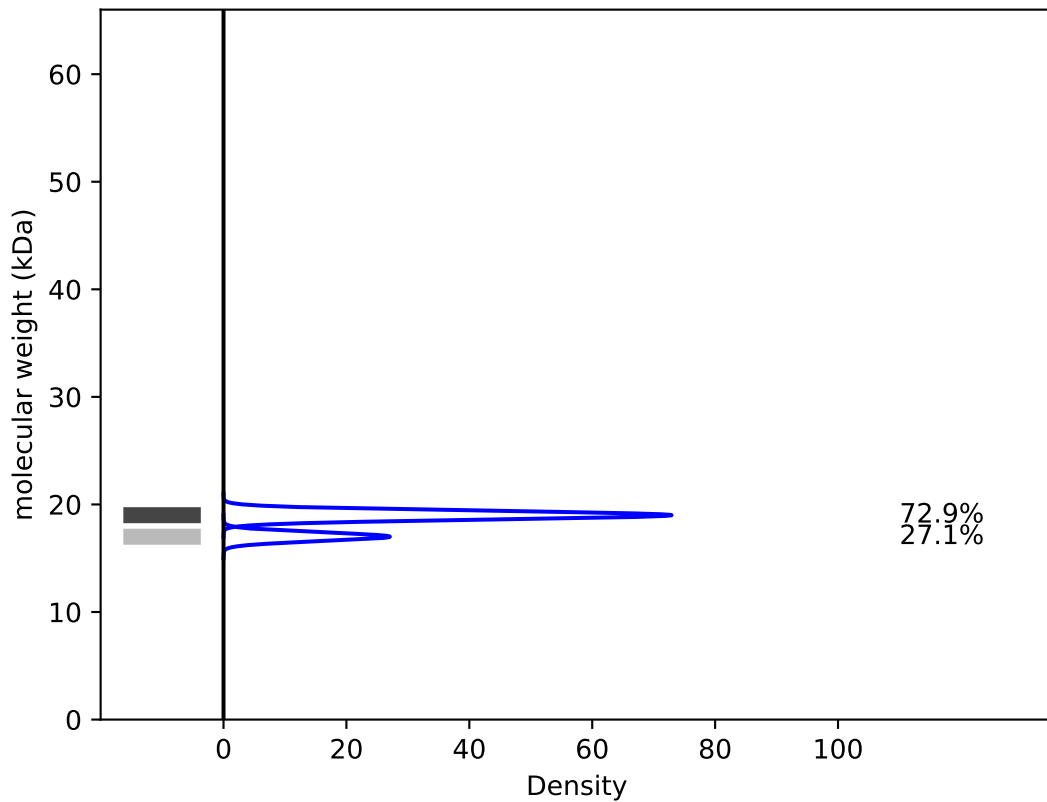

# P61019

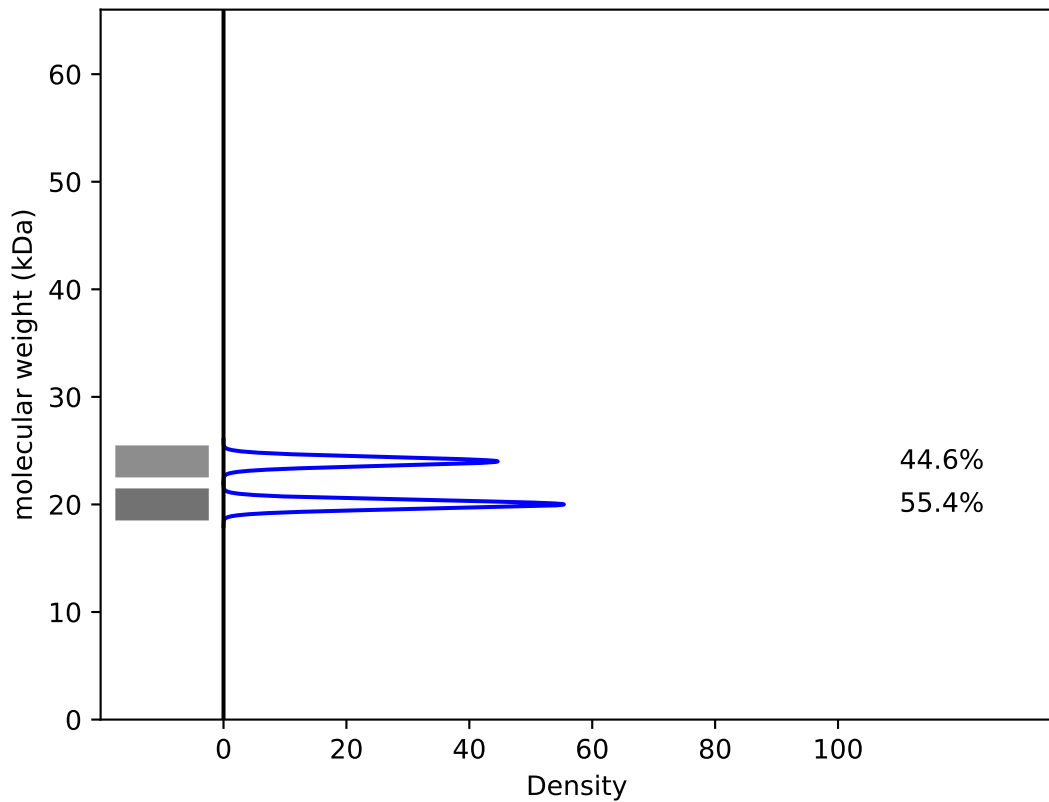

# Q8WUD1

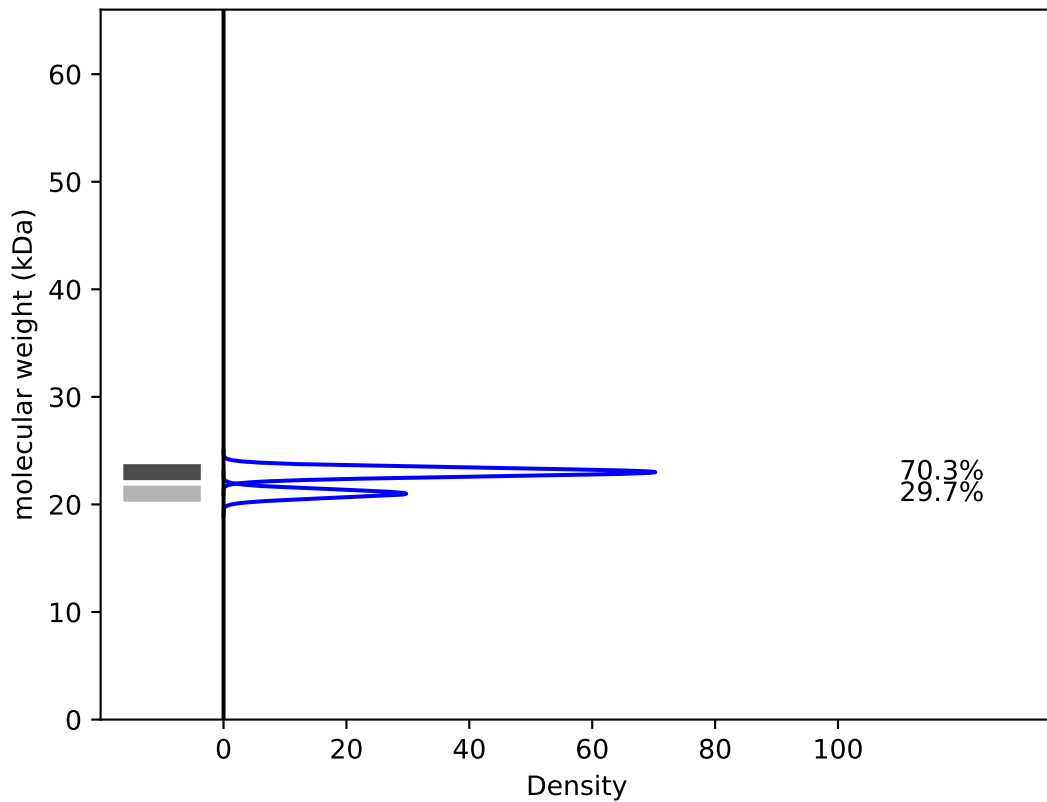

# P61026

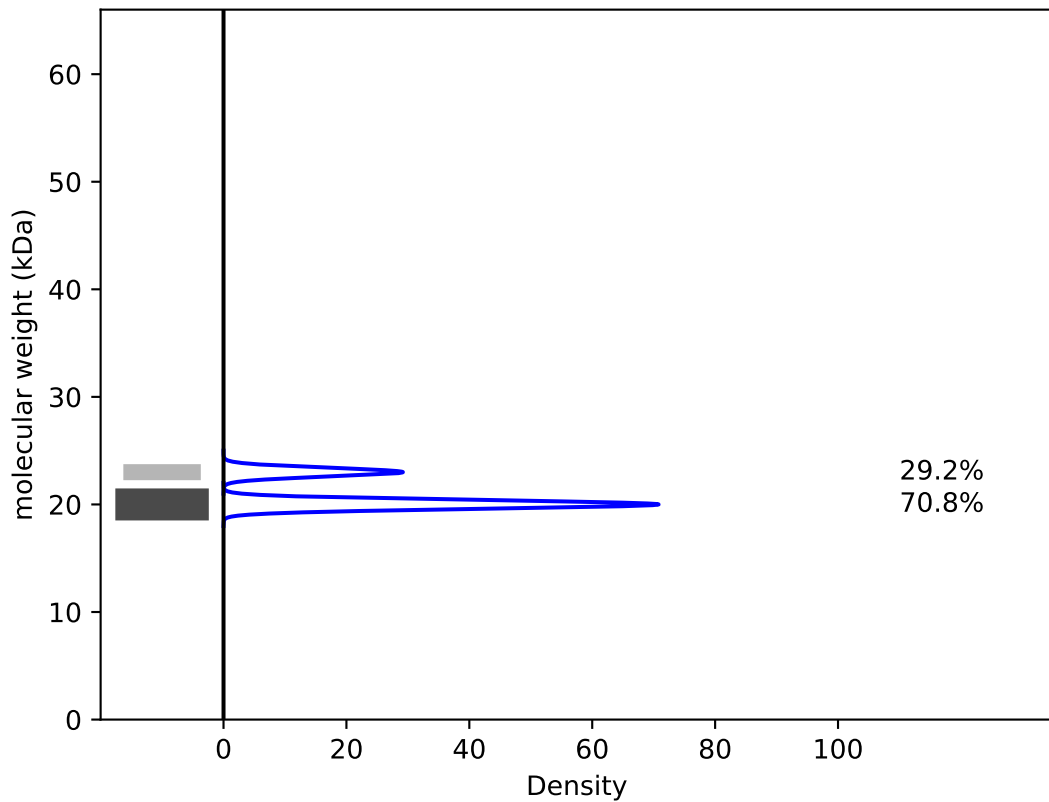

# P59190

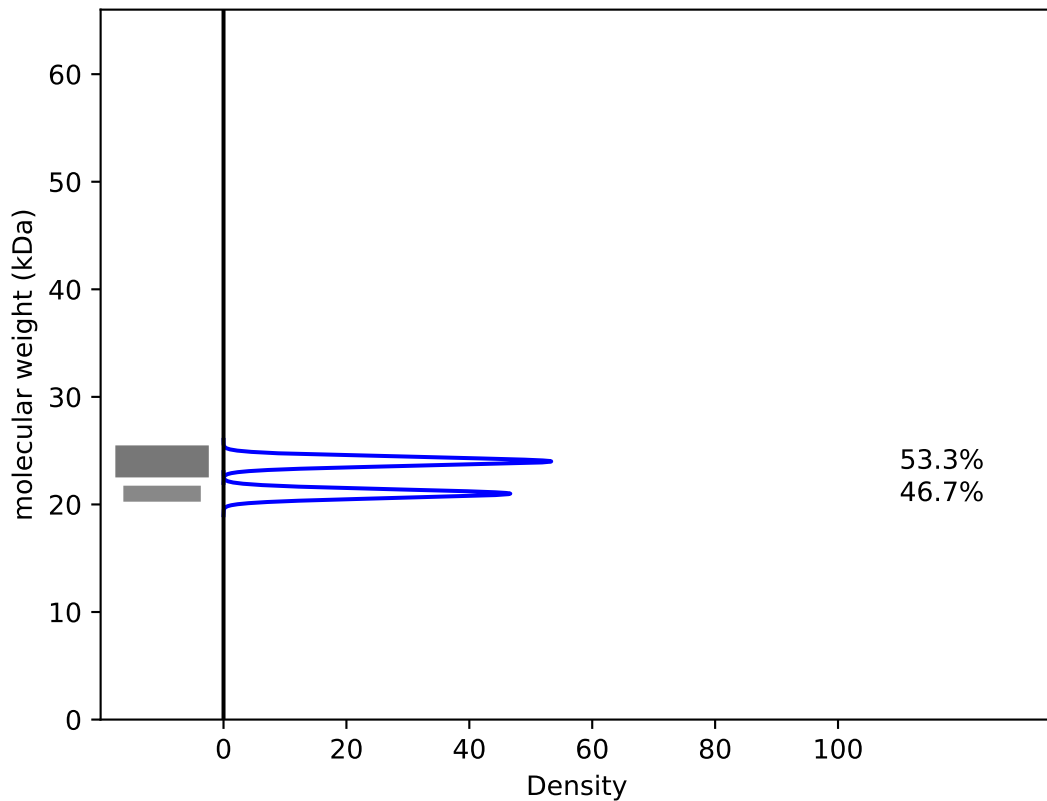

# P61081

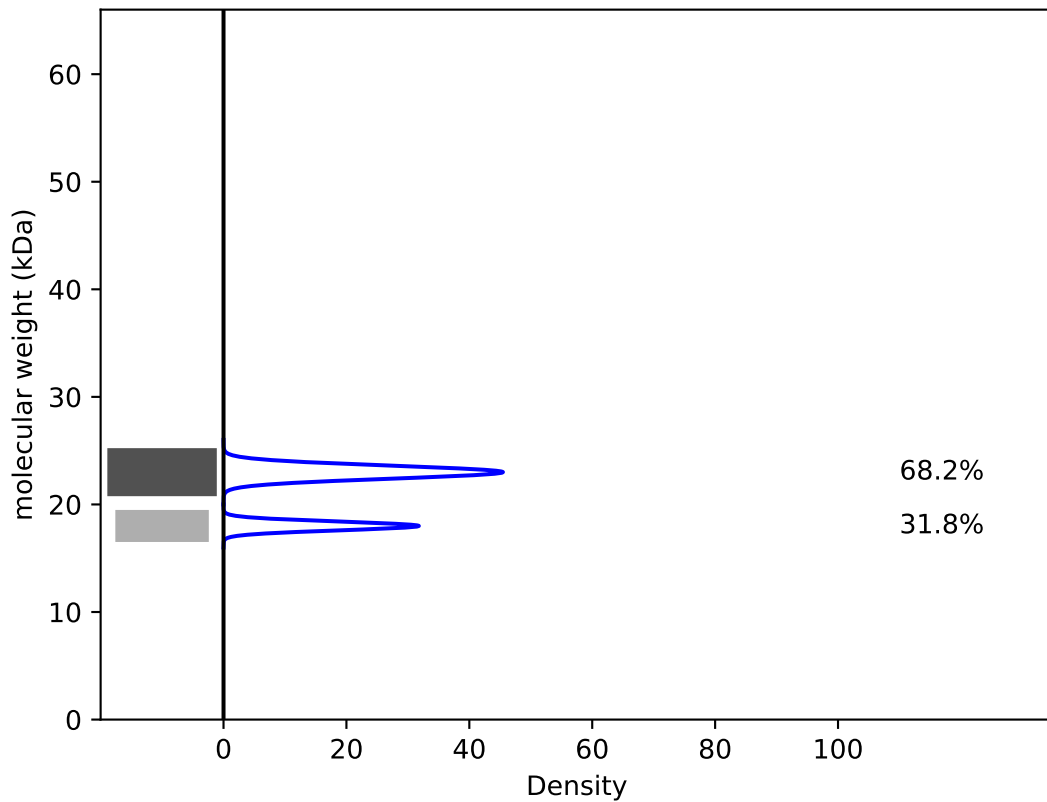



# P61086



# P61088



# Q5JXB2



# P61106



# P61158

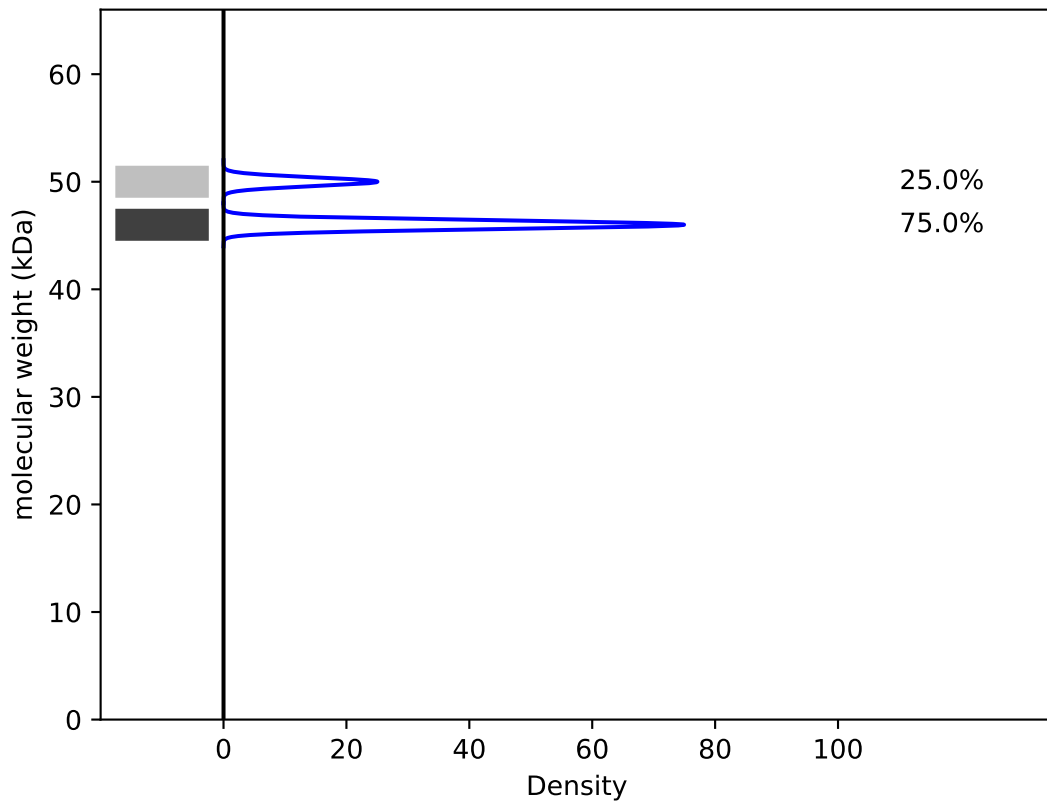

# Q9P1U1



# P61160



# P61163

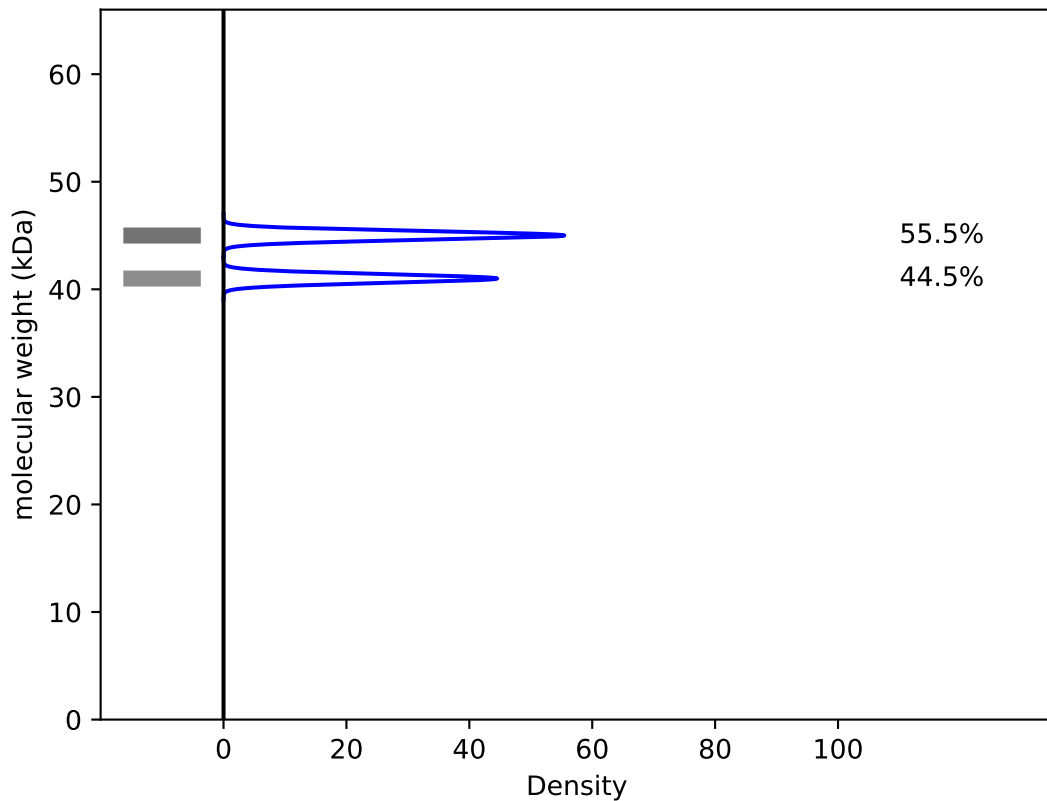



# P61201



# P61224

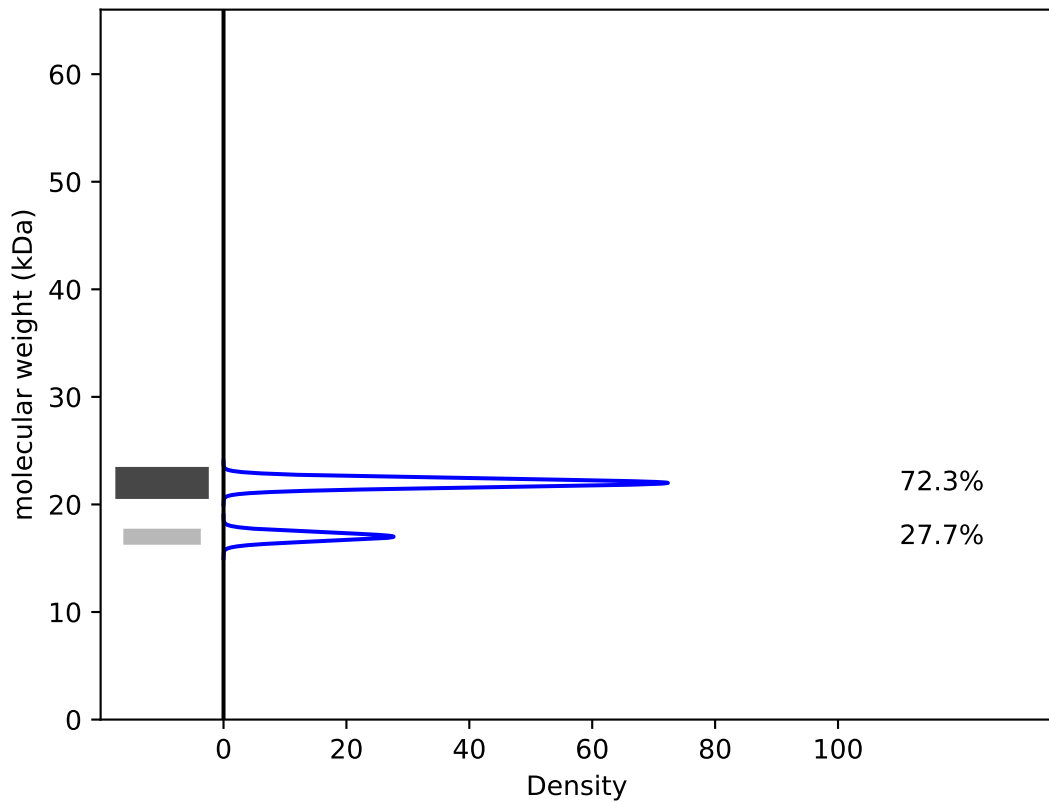

# P62834

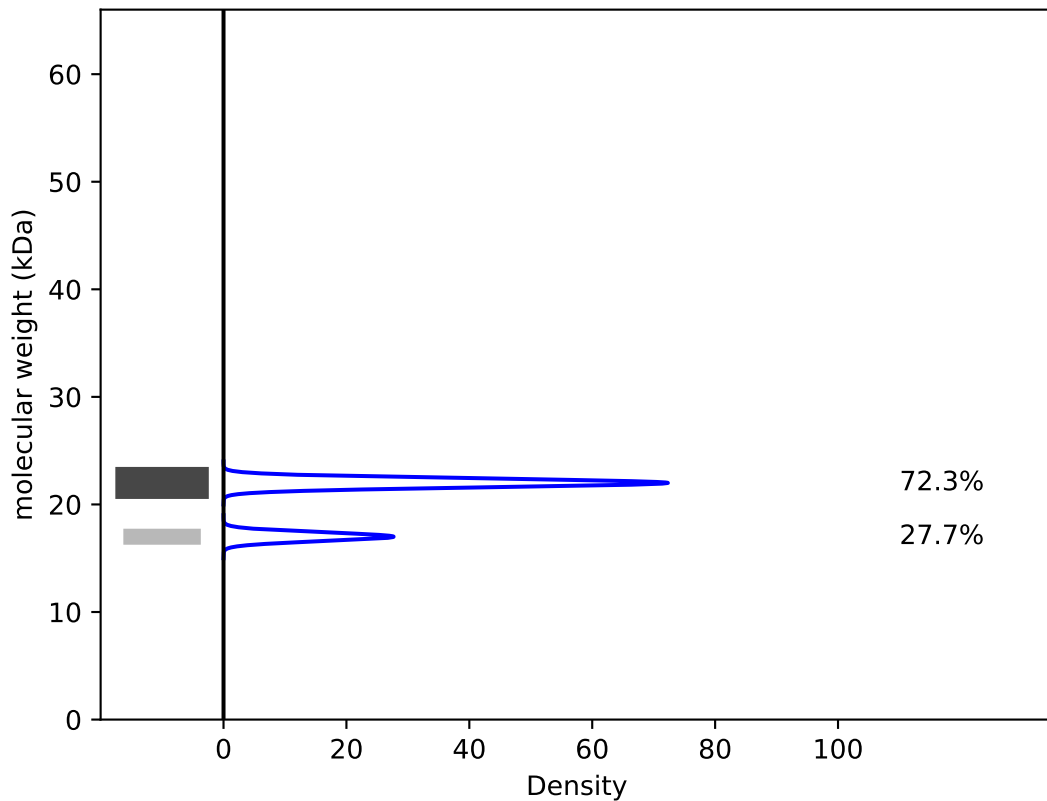

# A6NIZ1

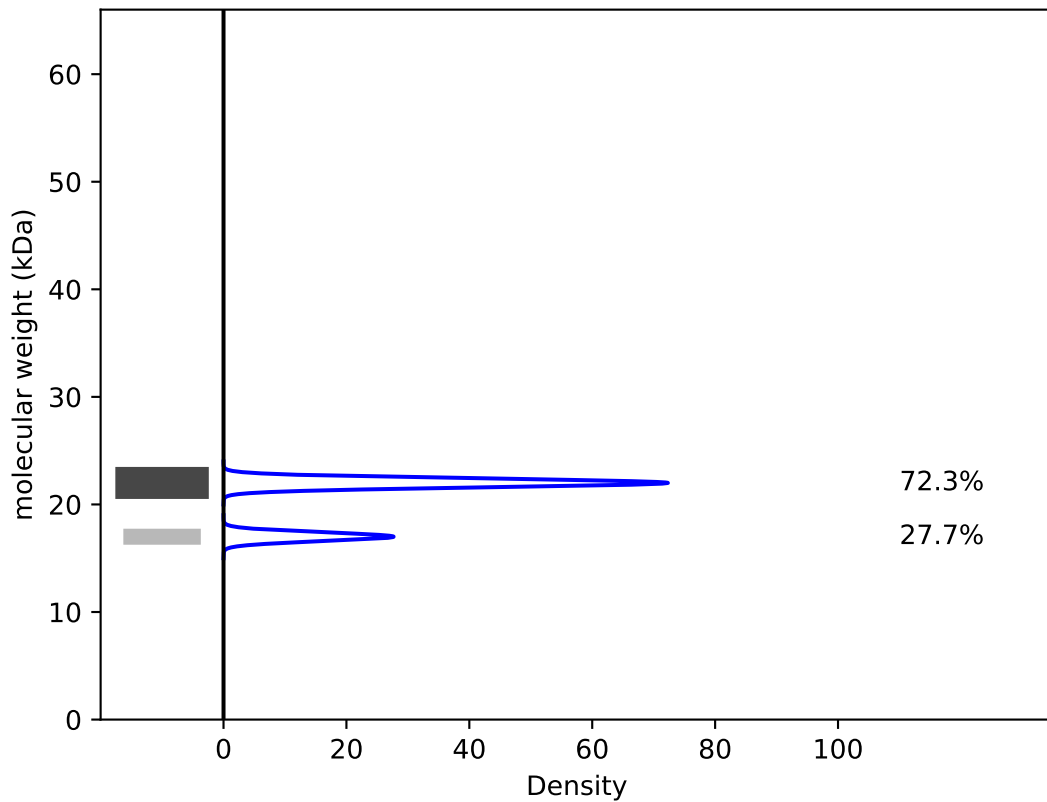

# P61247

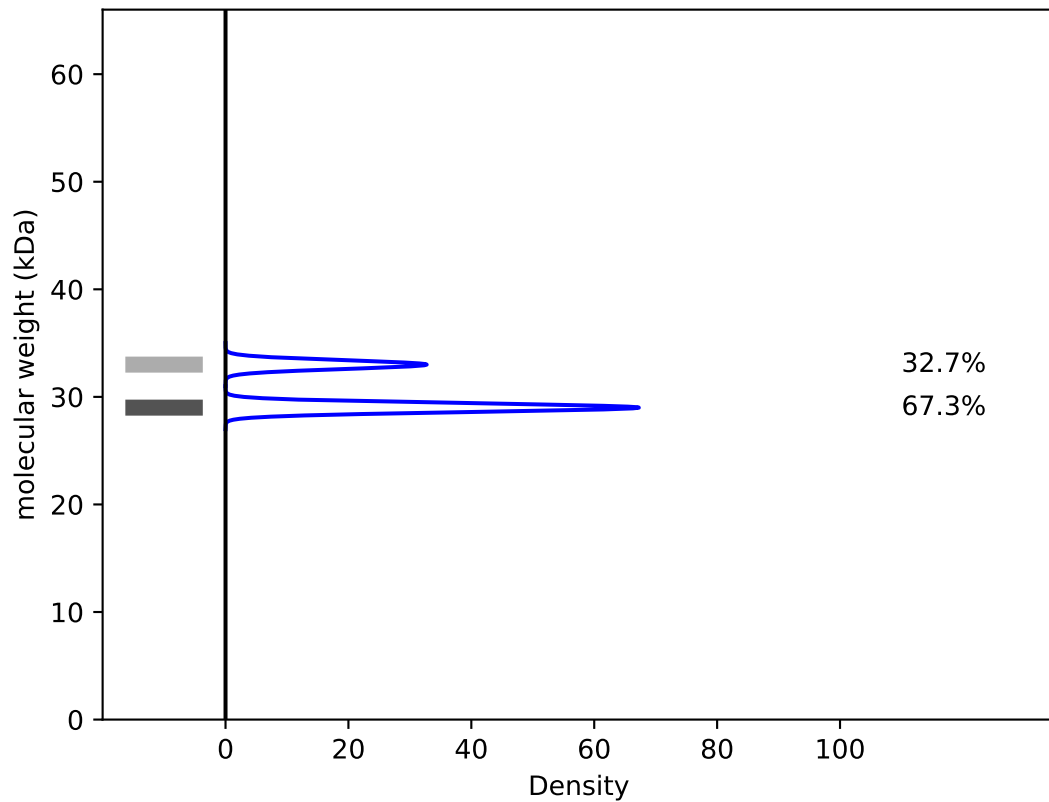

P61254



# P61289

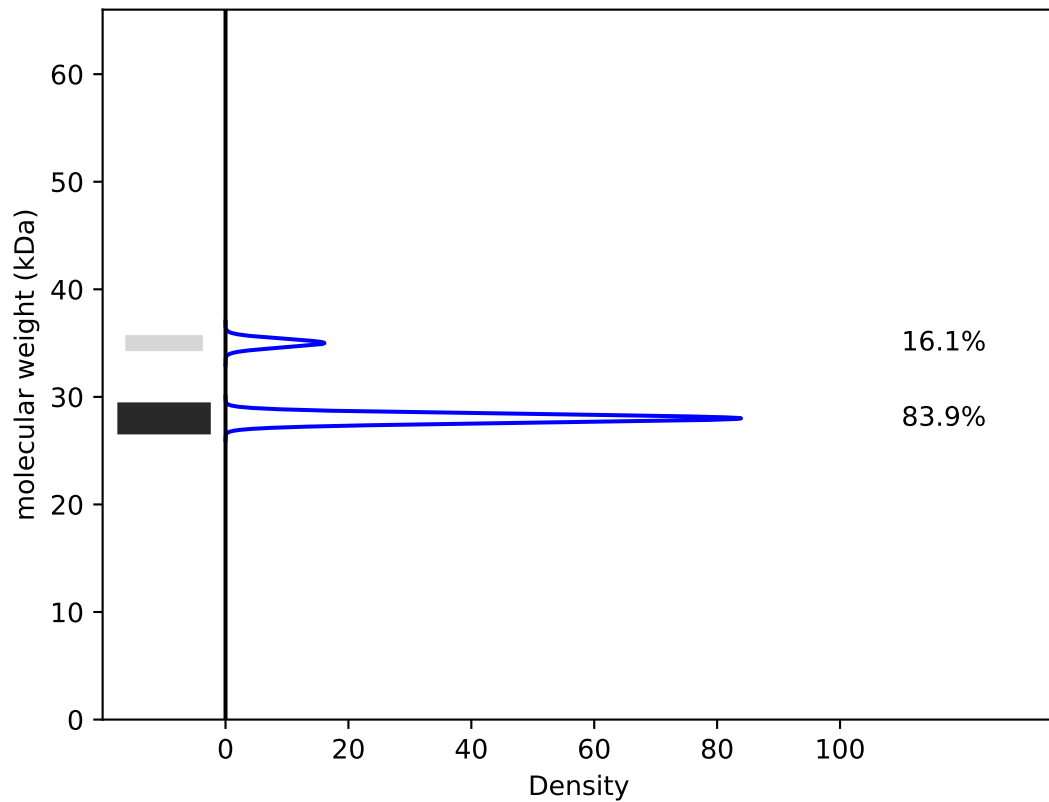

# P61313





# P61353

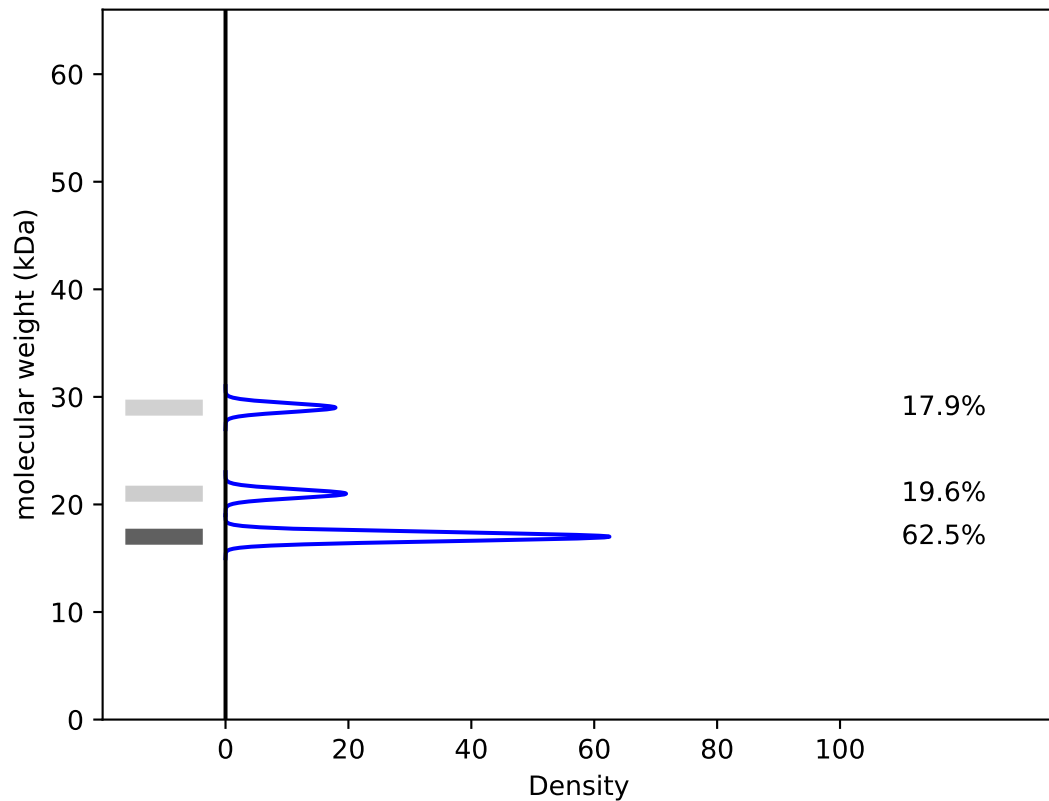

# P61421



# P61586

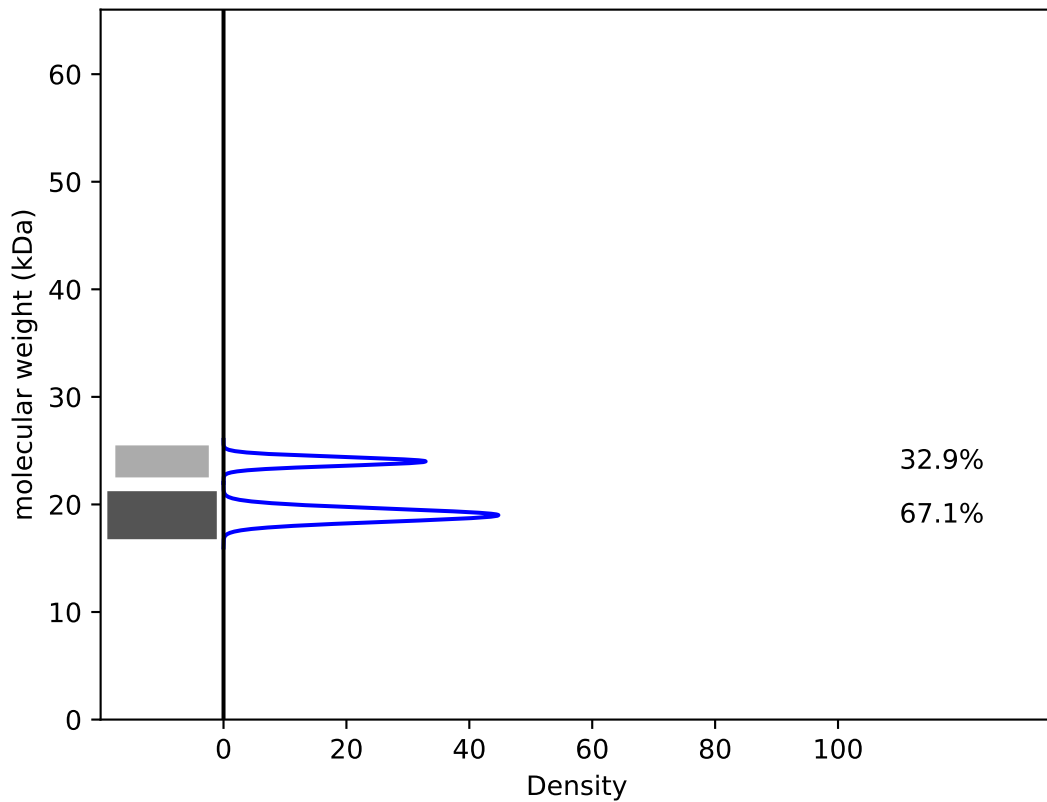

# P61758



# P61916



# P61923

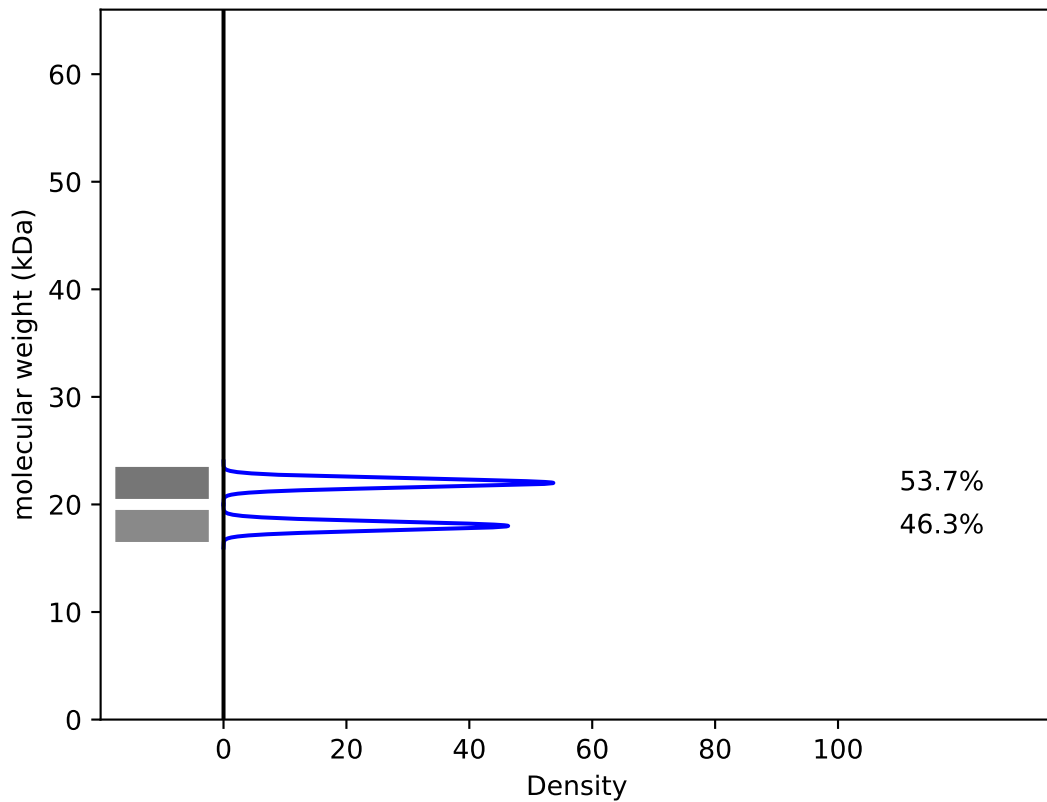

# P61964



# P61981





# P62081



# P62136

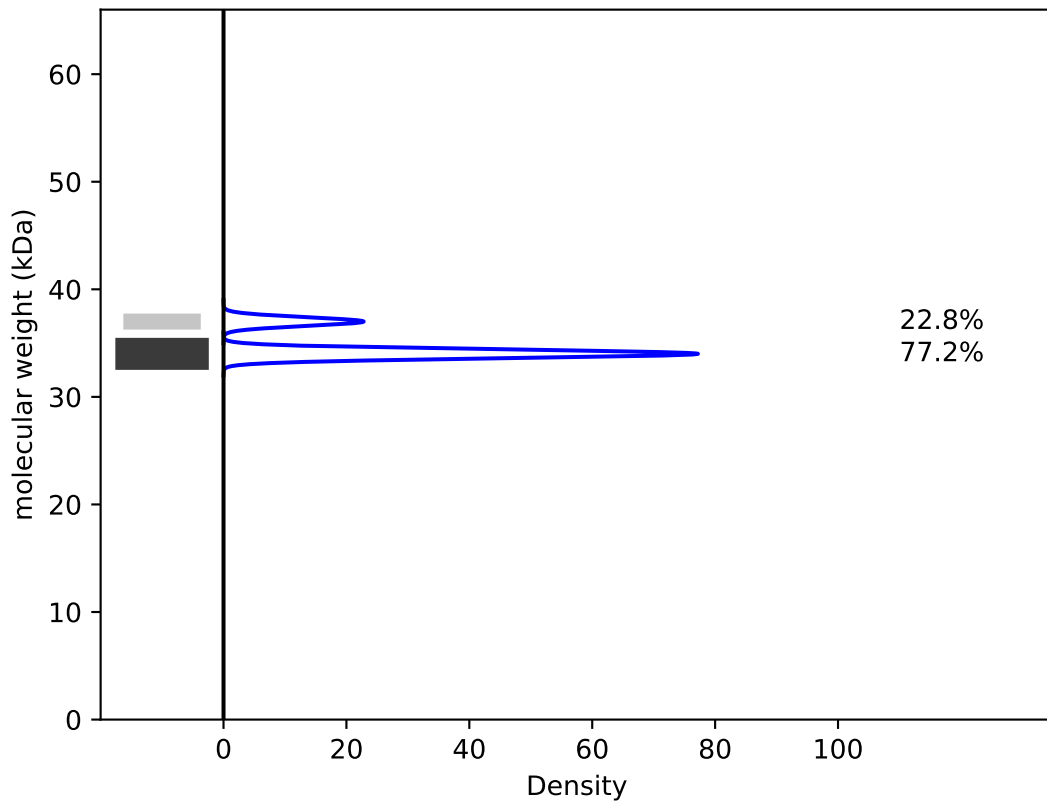

# P62140

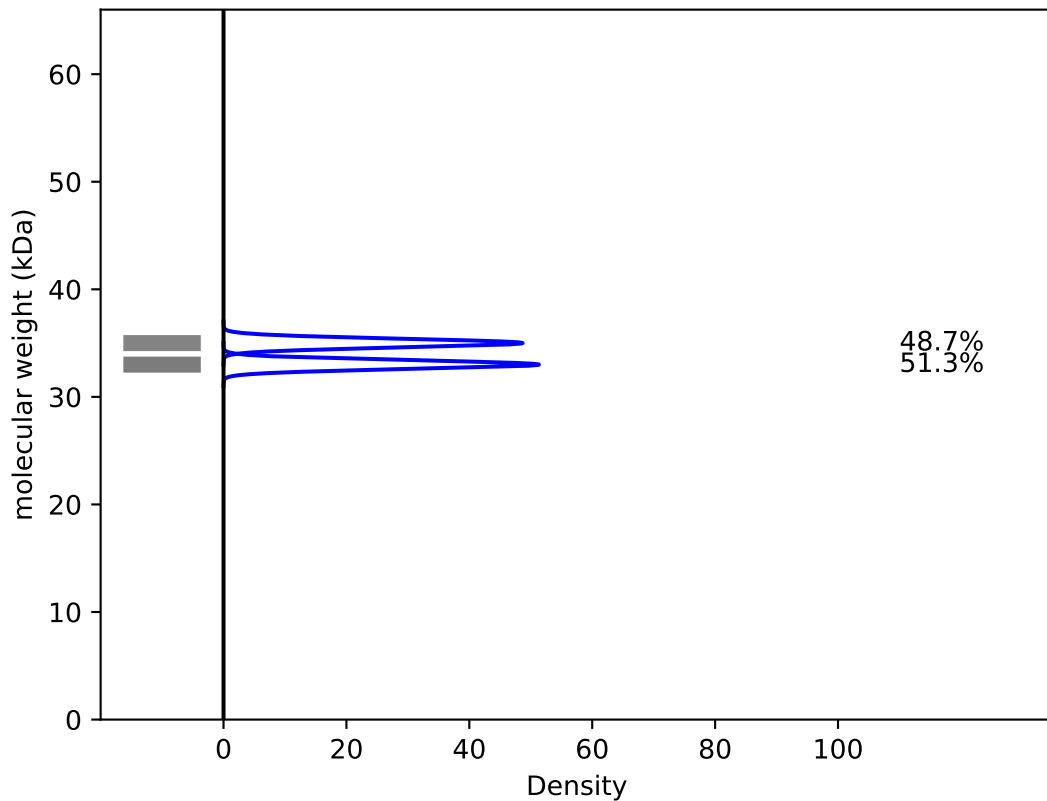

# P62191

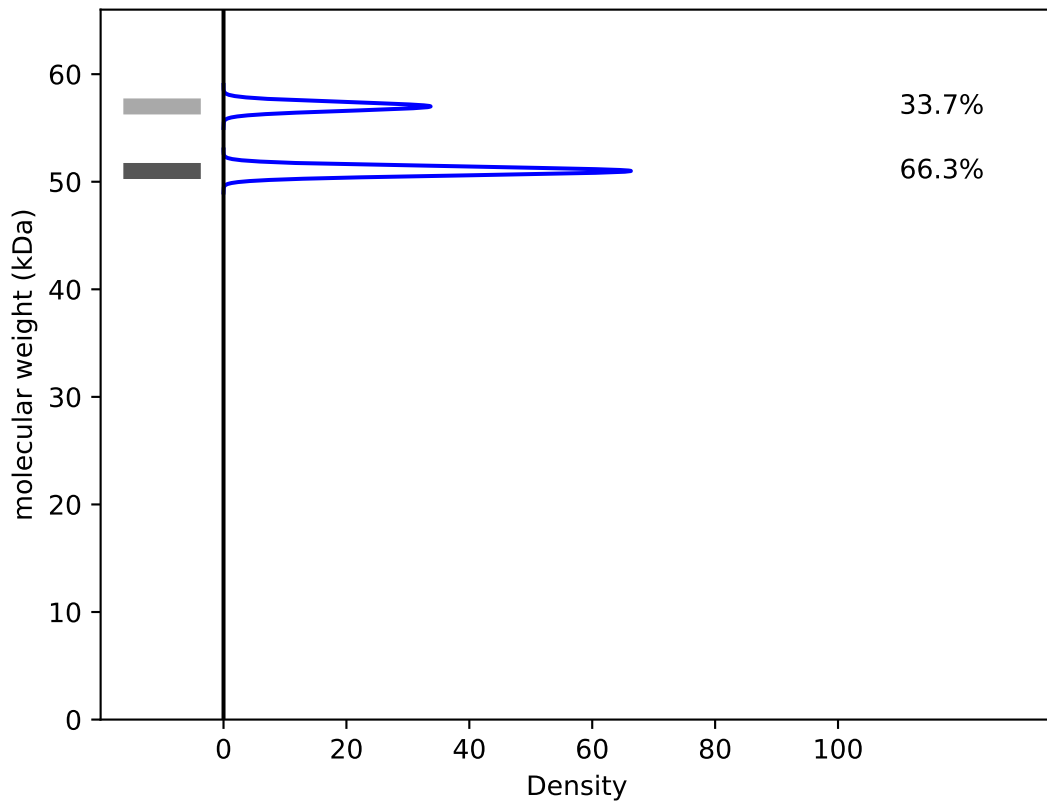

# P62195

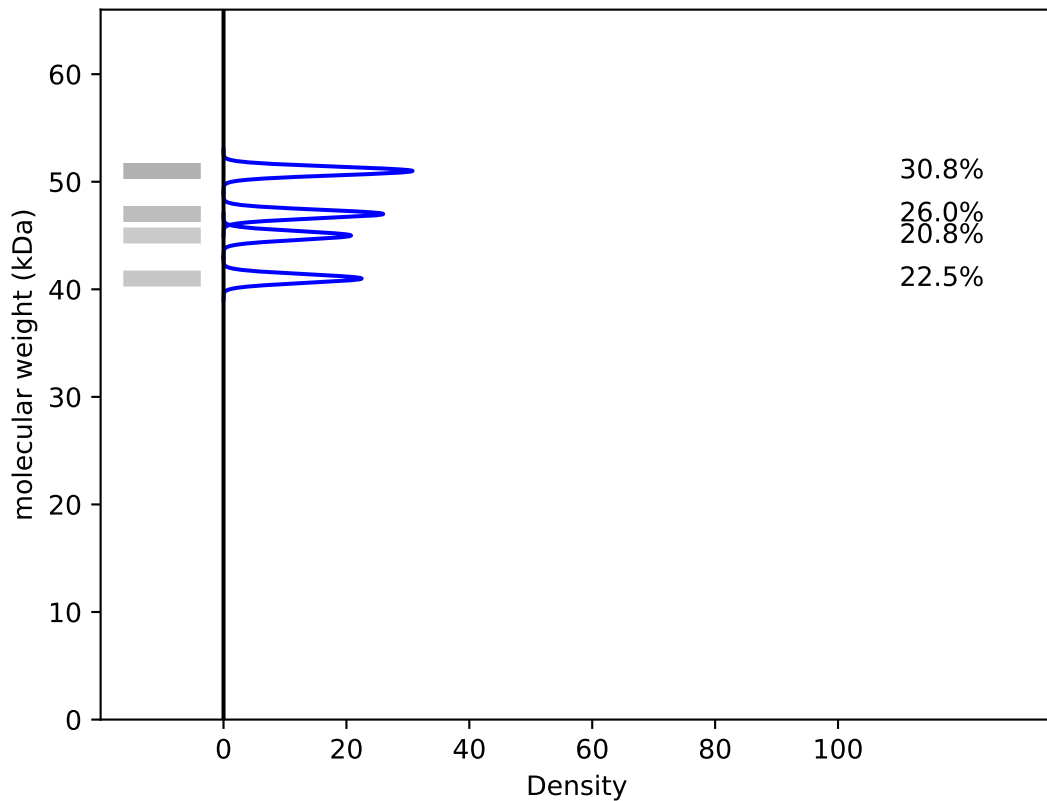

# P62241

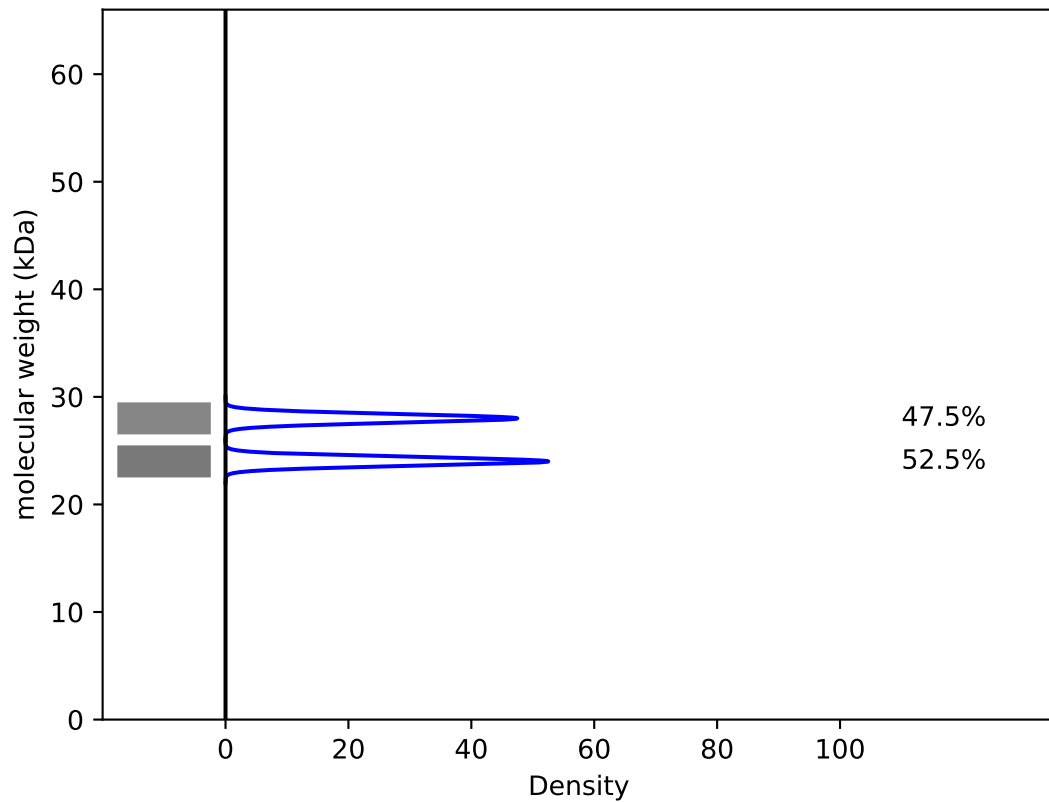

# P62244



# P62249

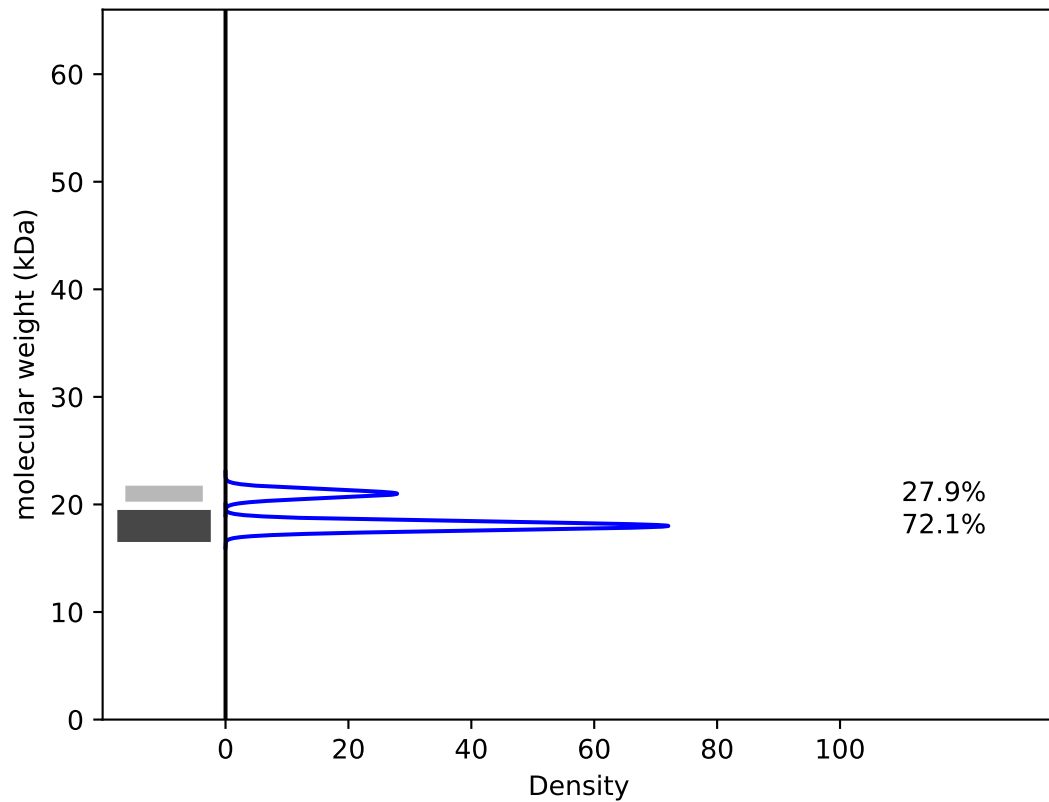



P62256



P62258



# P62263

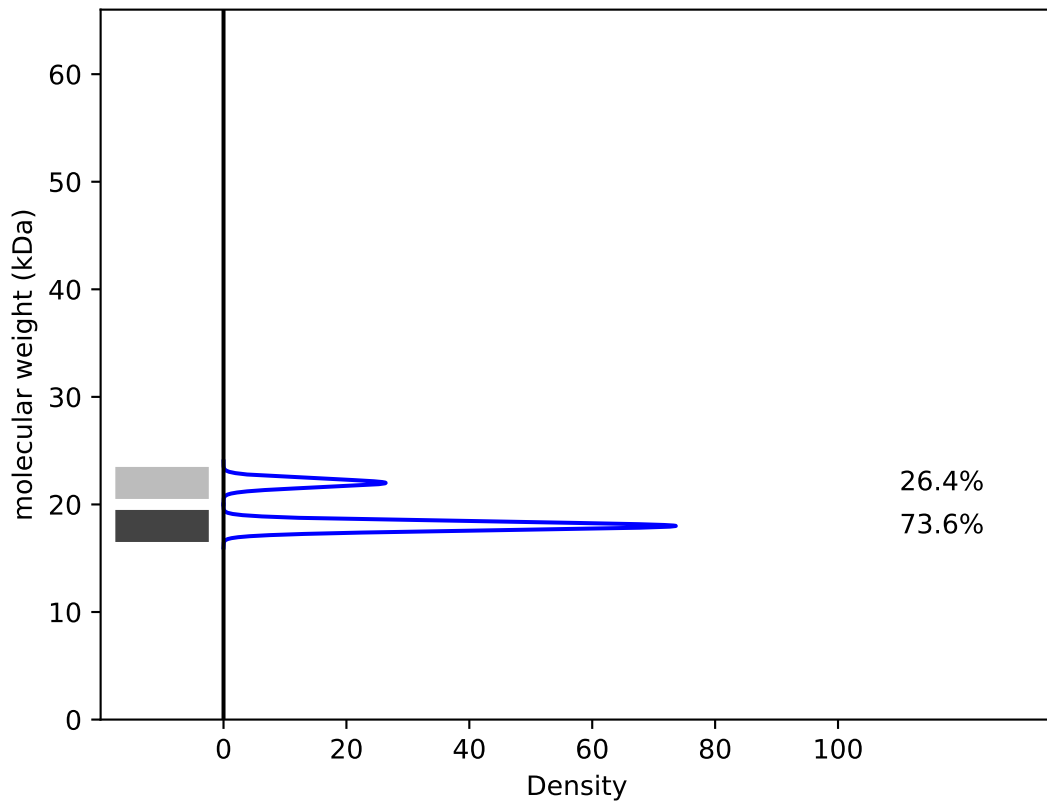

P62266

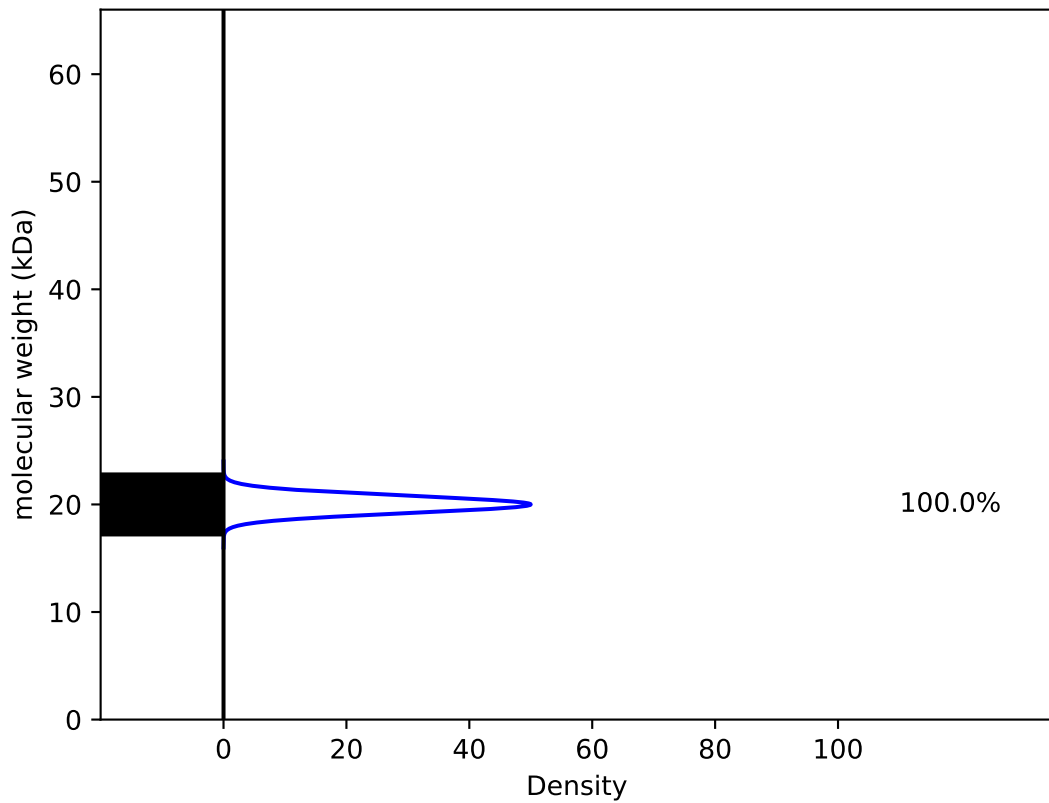

# P62269



P62277



# P62280

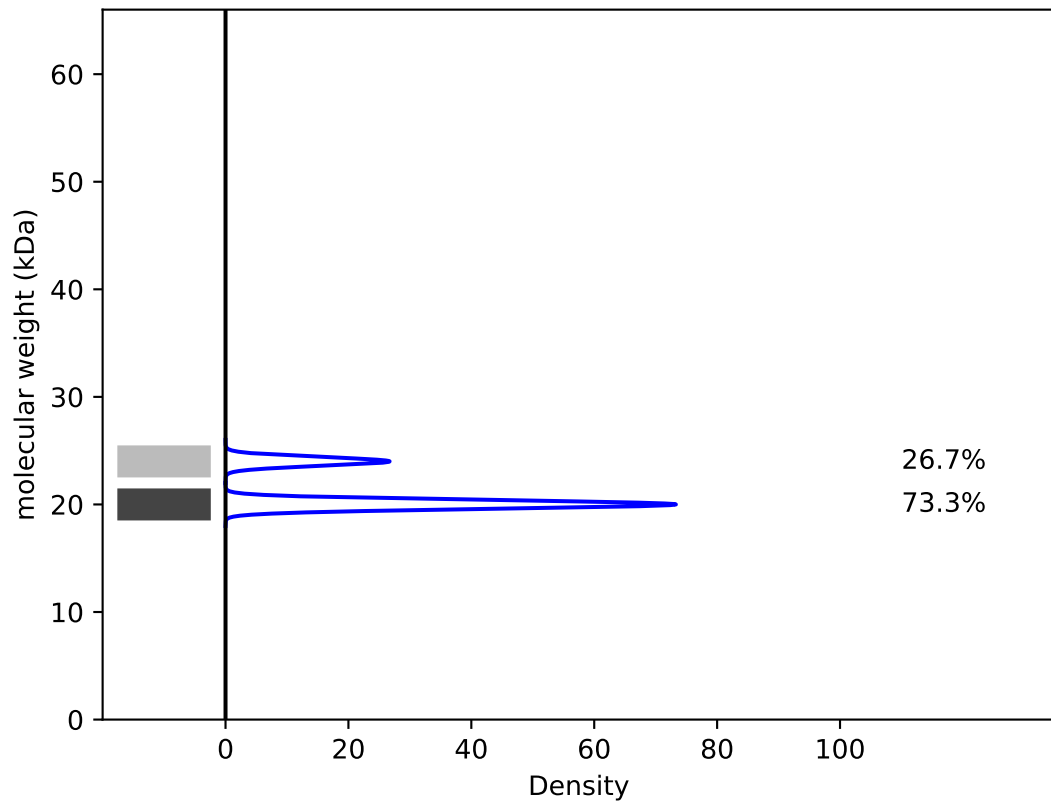

# P62330





# P62333

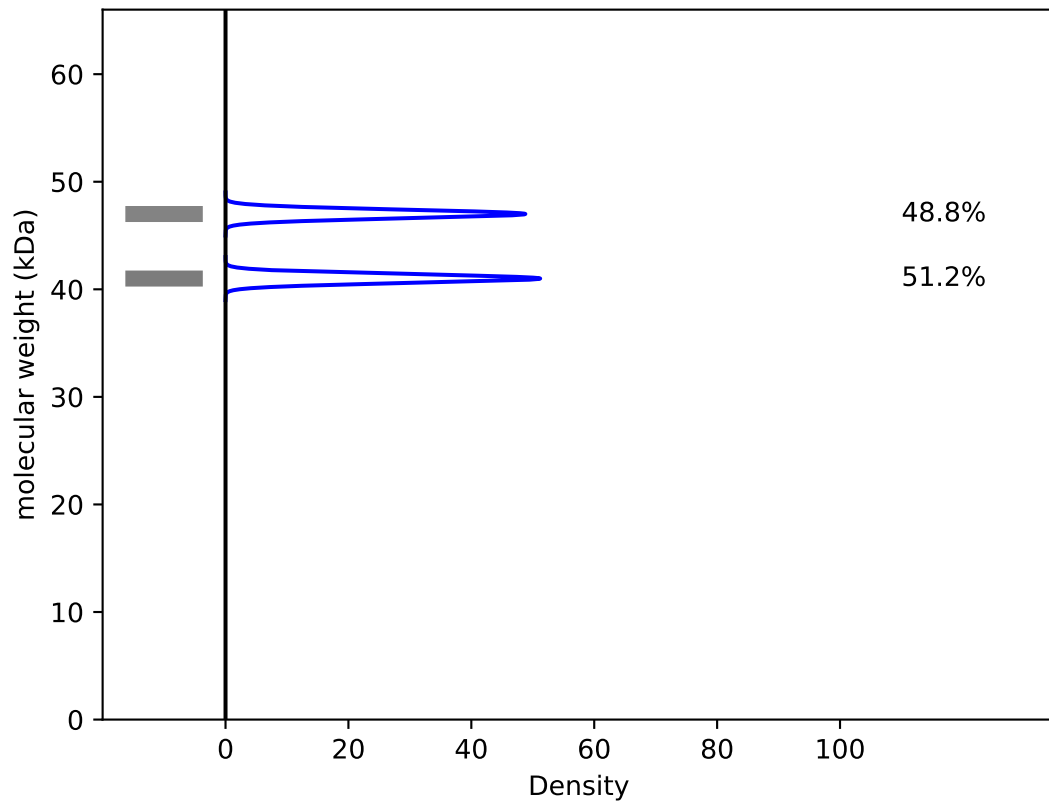

P62424



P62495



P62701

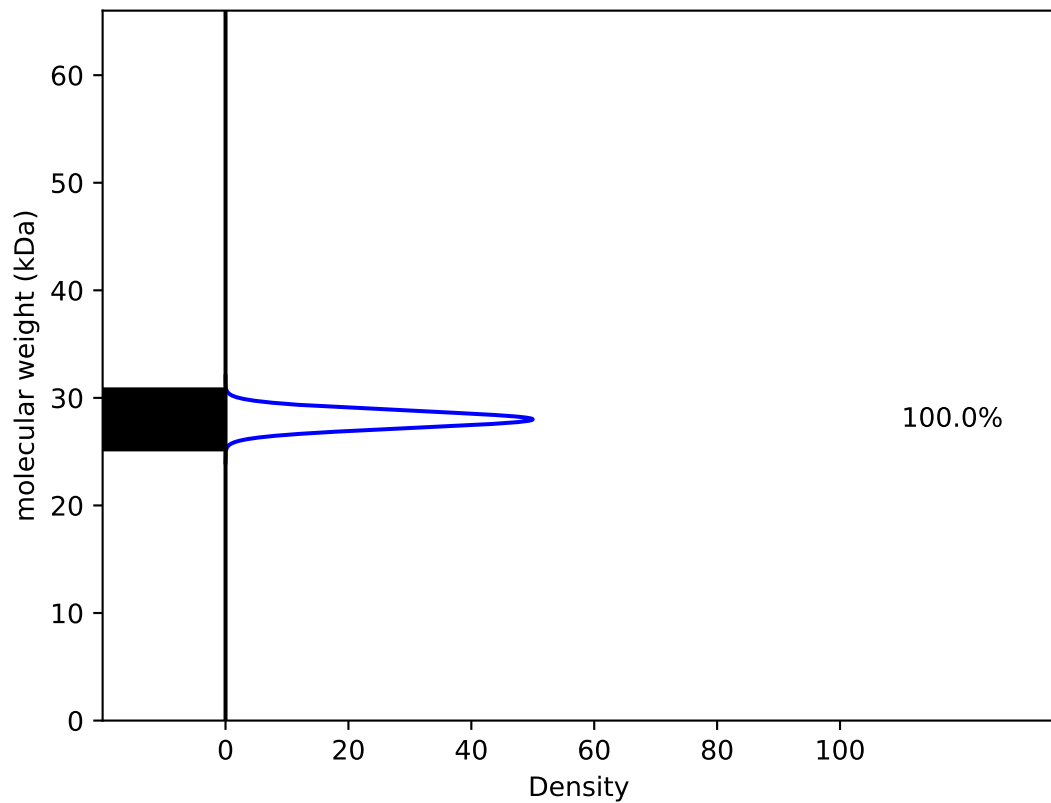

# Q8TD47

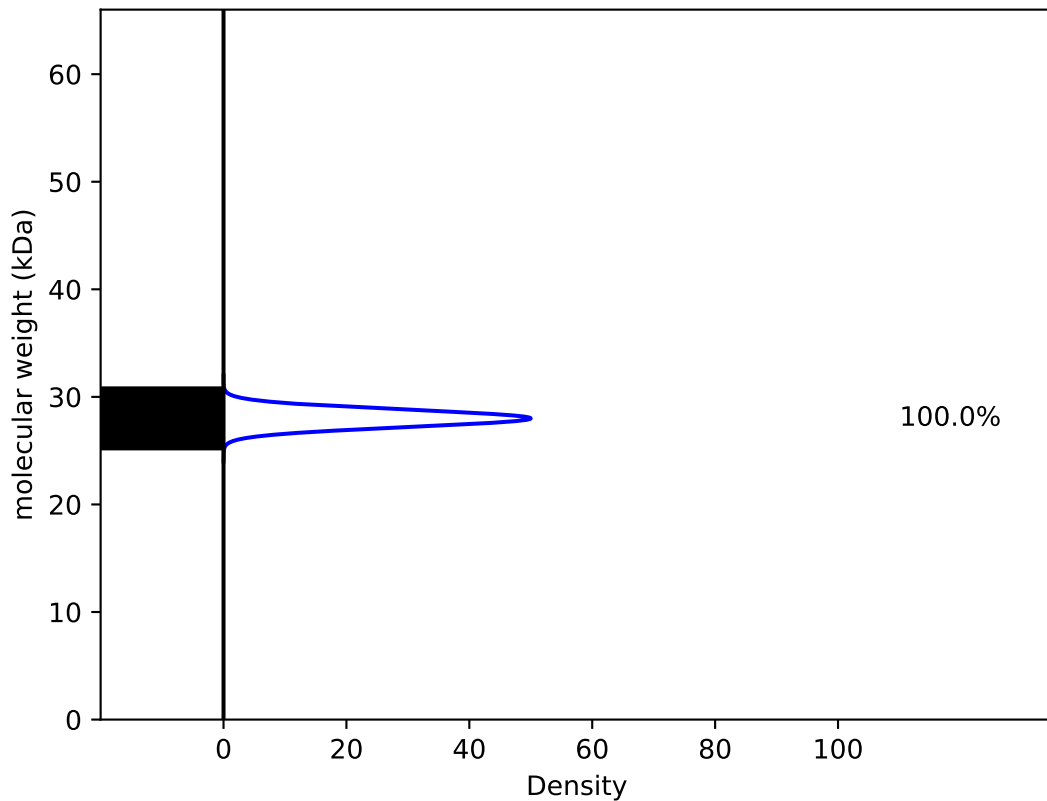

P22090



# P62750



# P62753

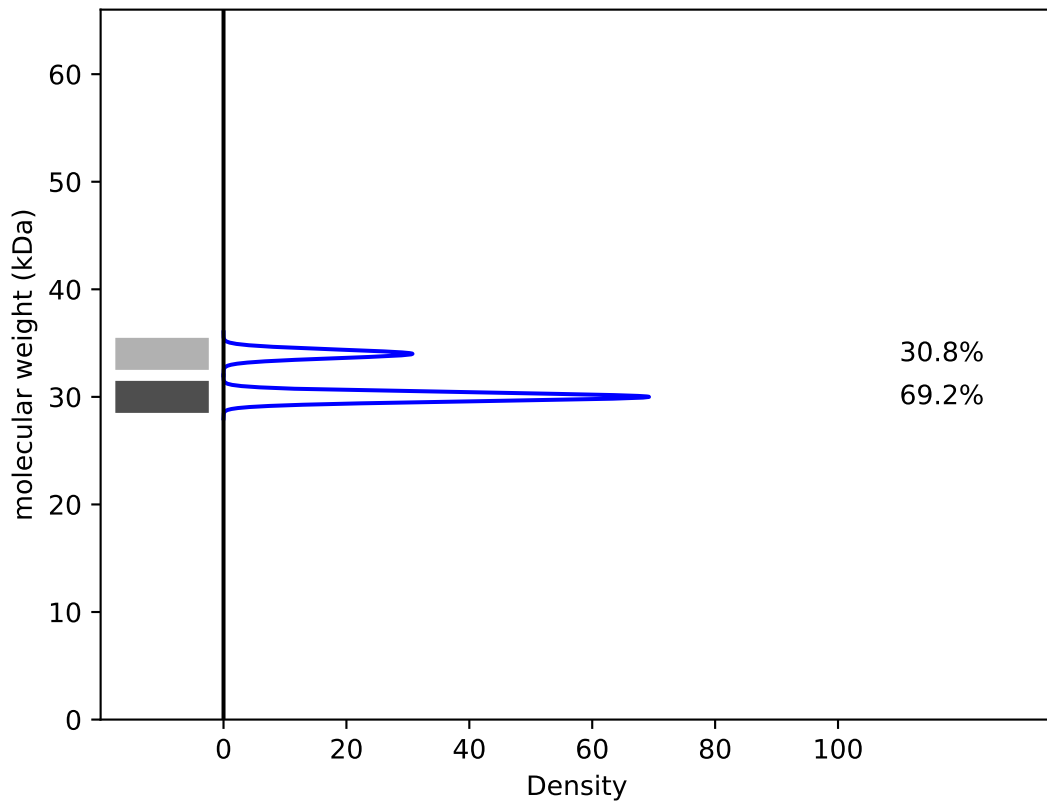



# P62820



# P62826

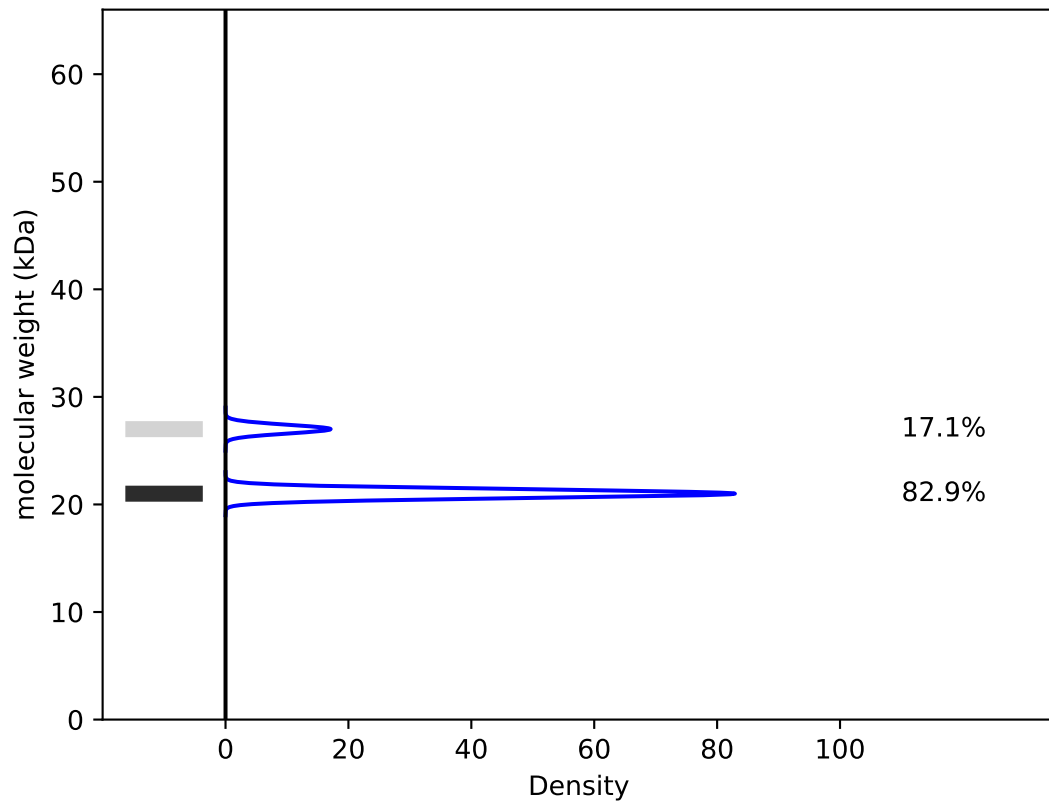

P62829



# P62851



# P62873

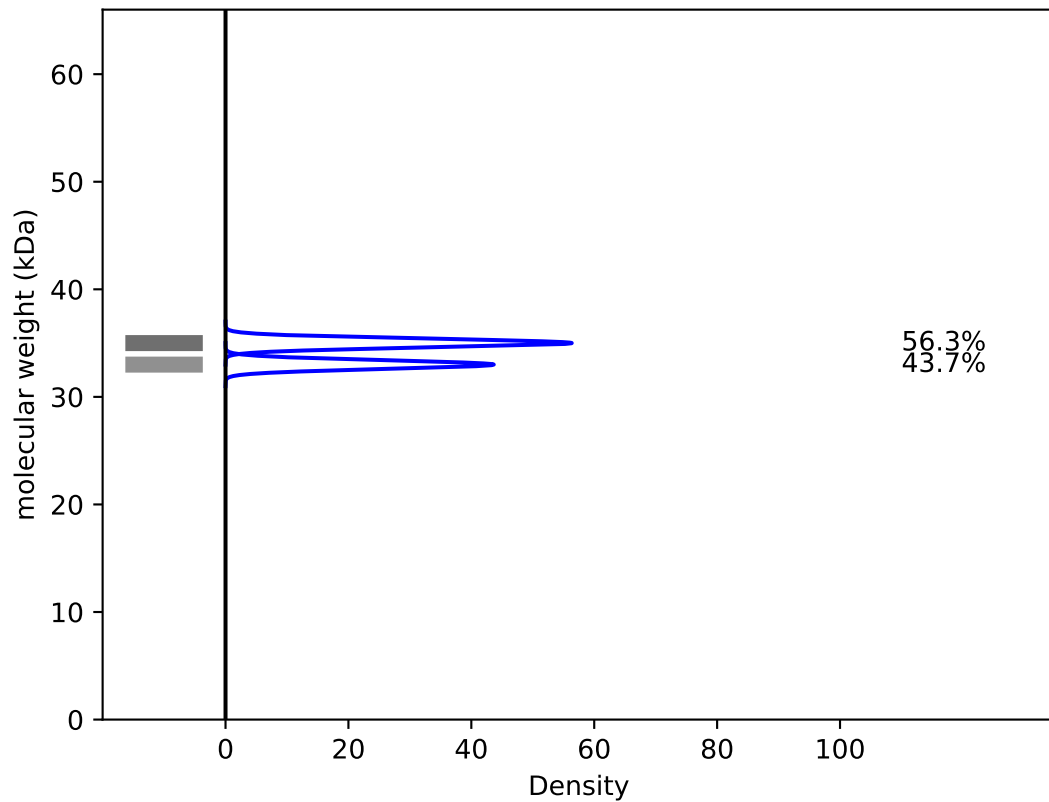

# P62879



# P62906



# P62910

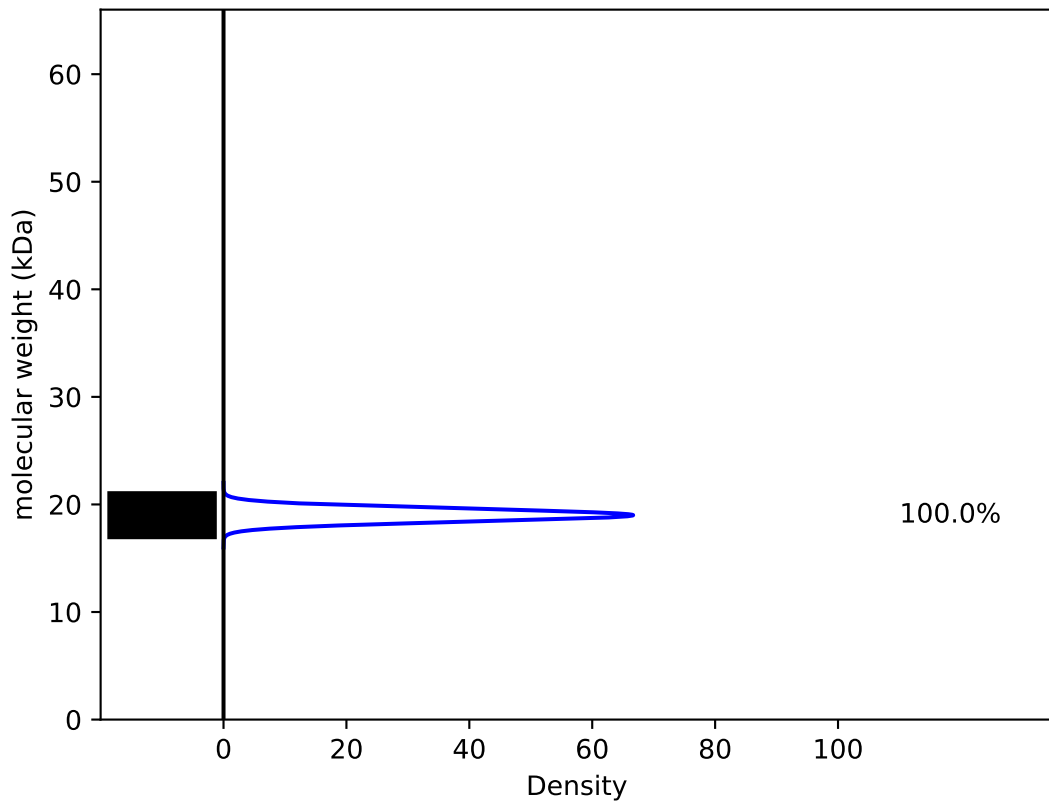



# P62913

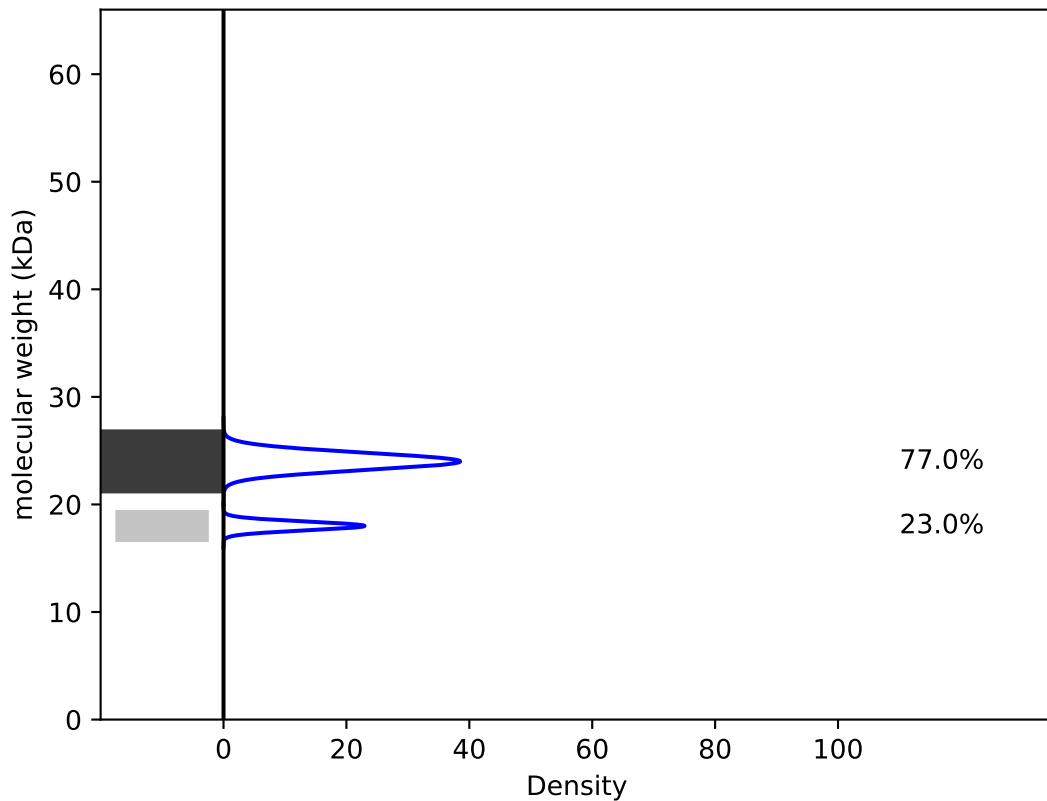

# P62917

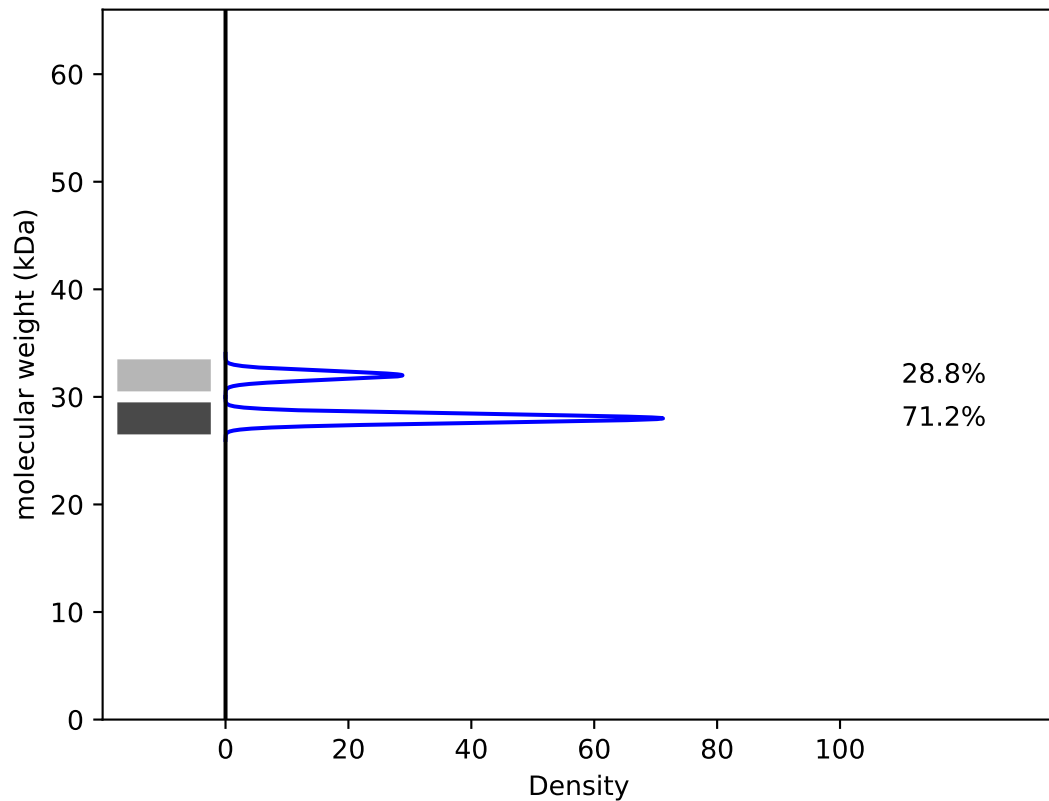

# P62937

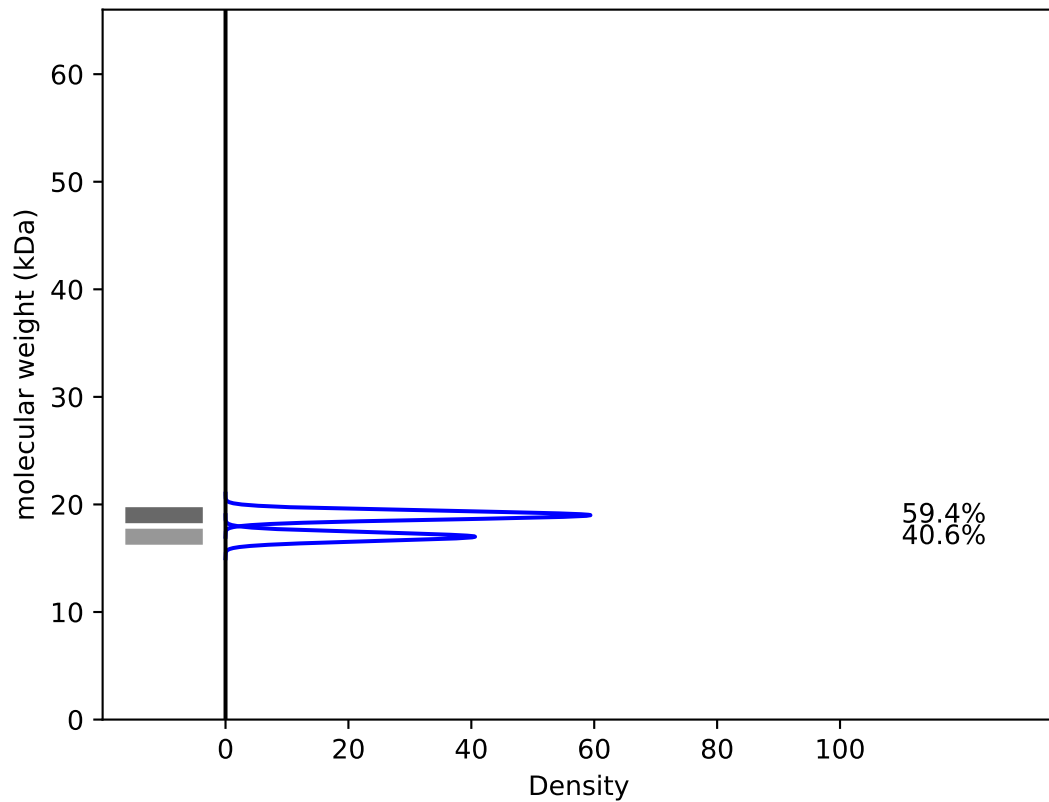

# Q9Y536

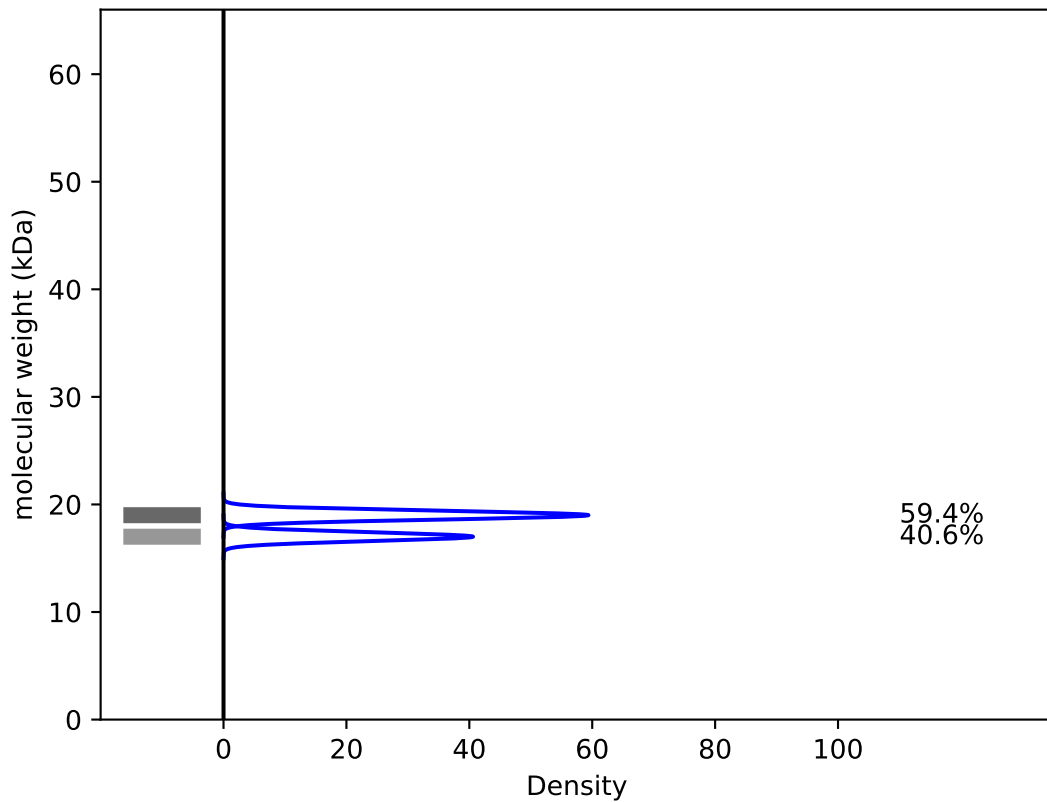

# PODN26



# F5H284



# A0A0B4J2A2



# A0A075B759

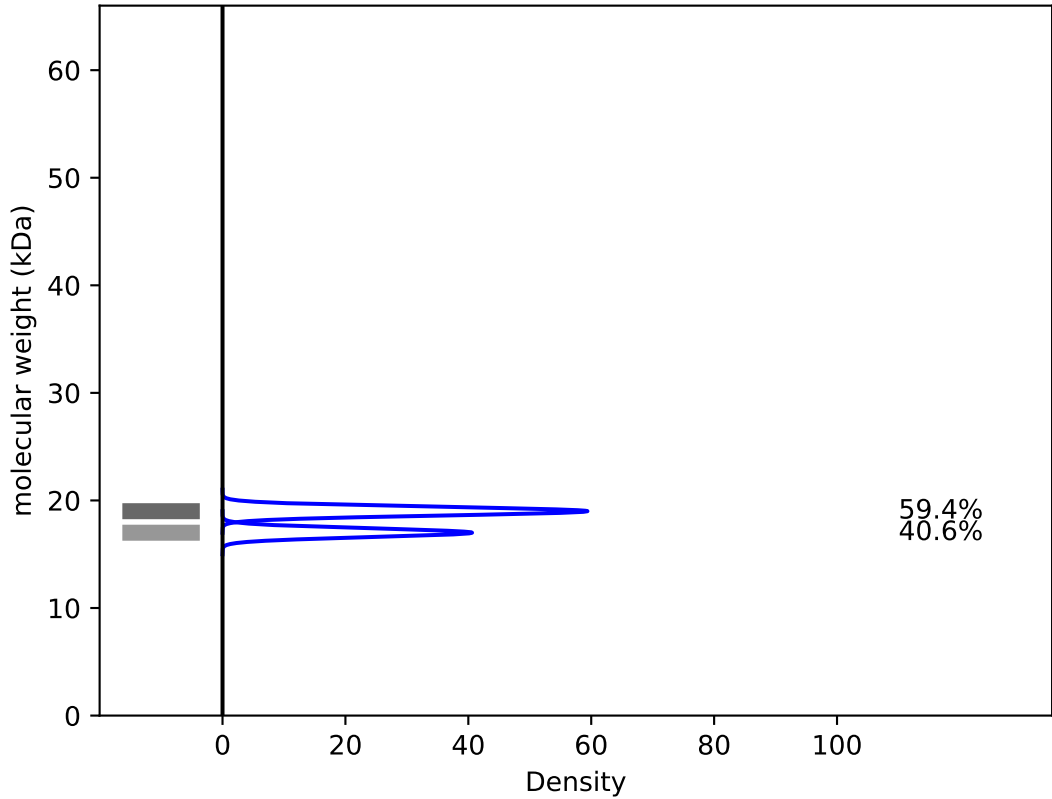



# PODN37



# P62993



# P62995

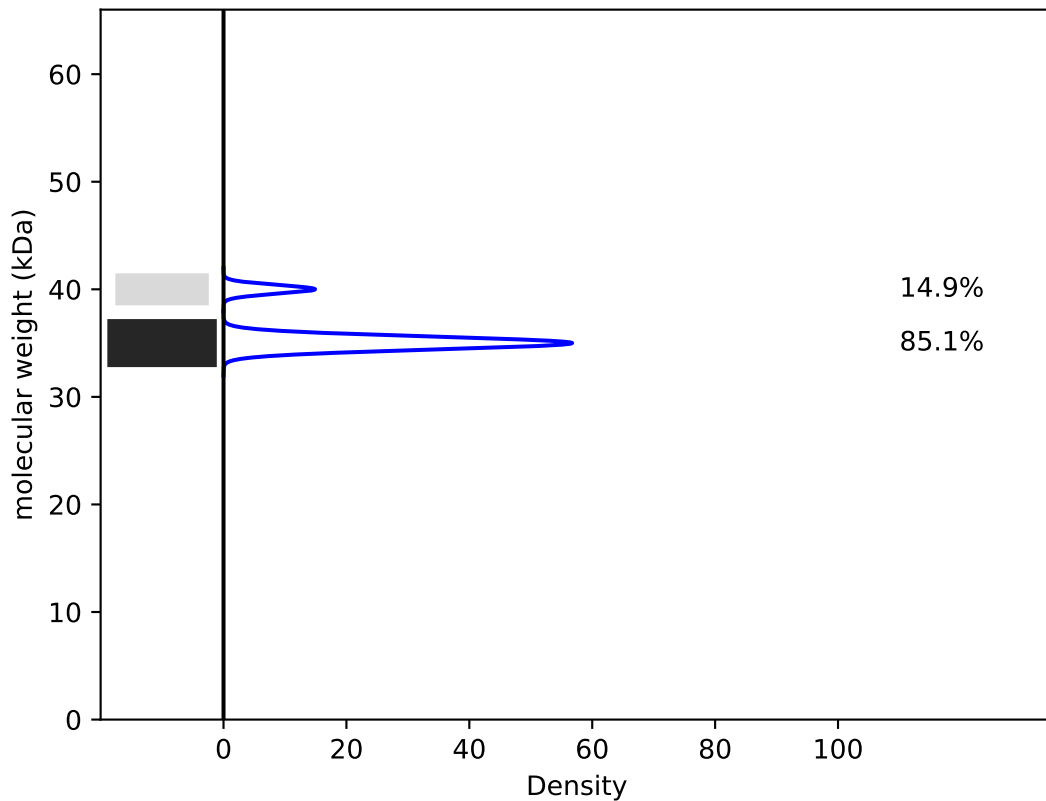

# P63000

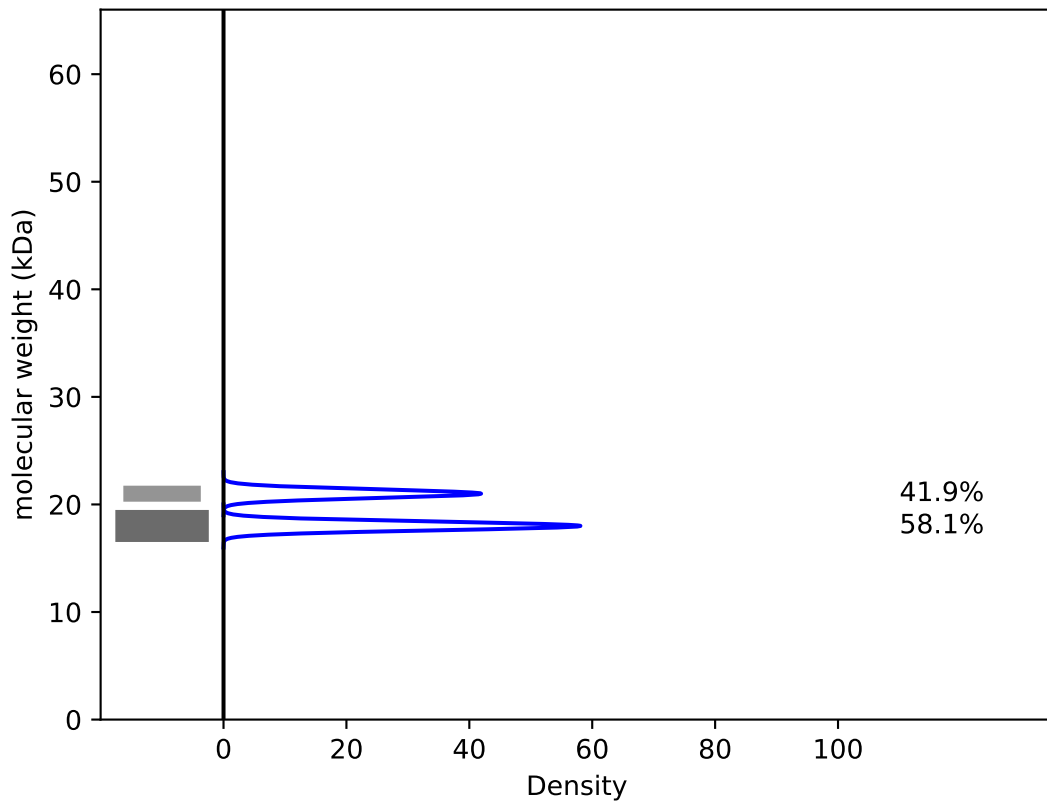

# P60763

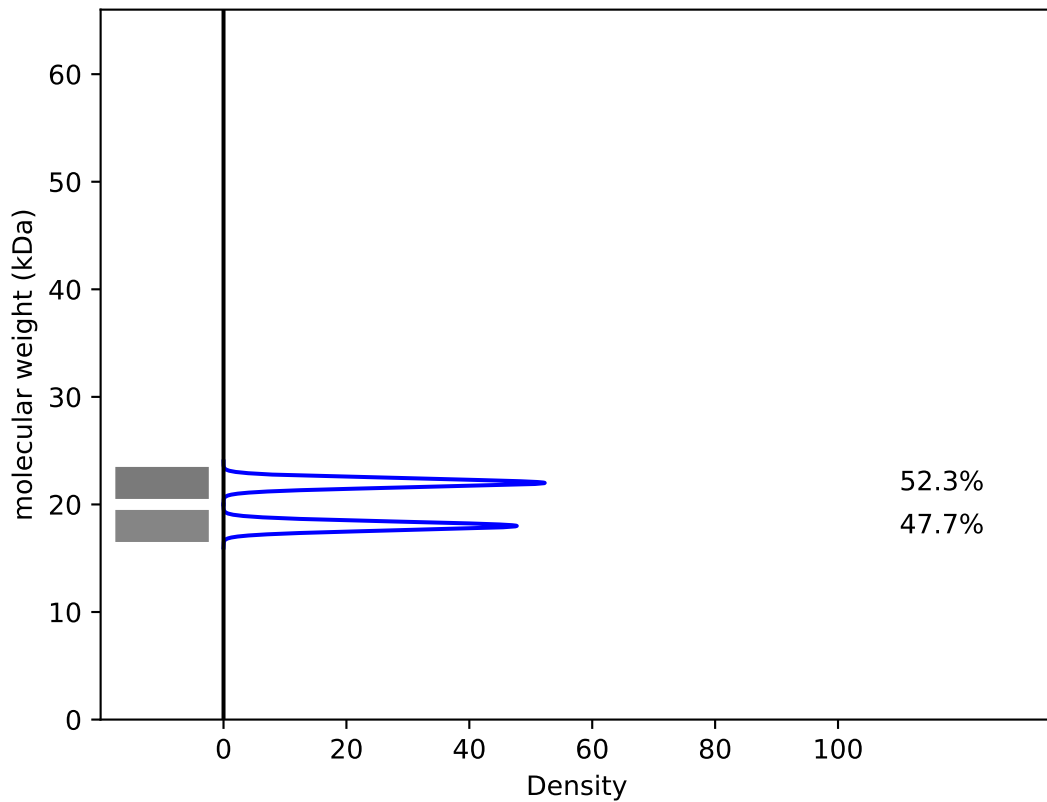

# P15153

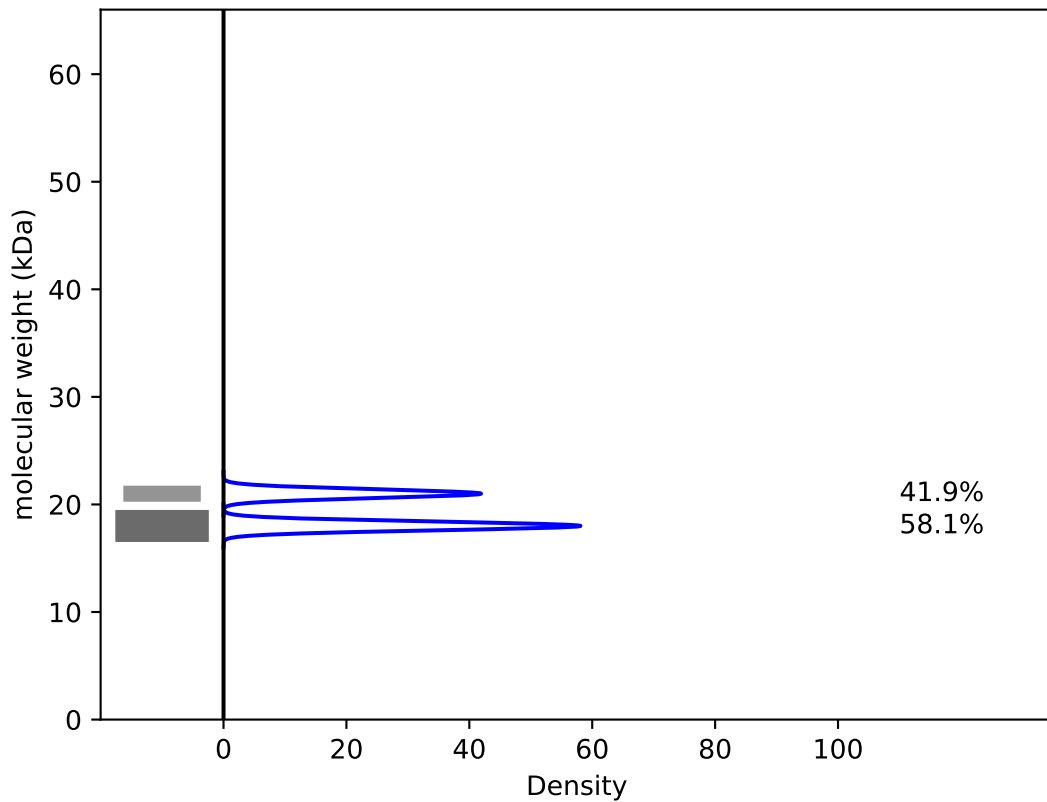

# P63092

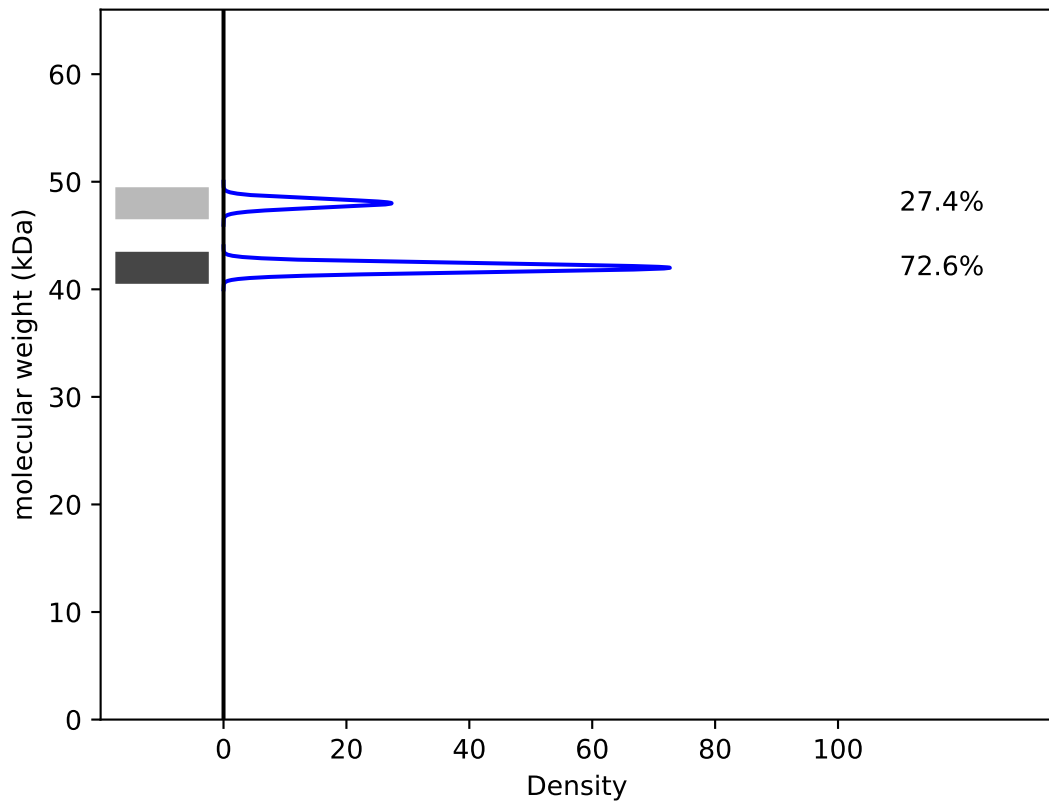

P63104





# P63151

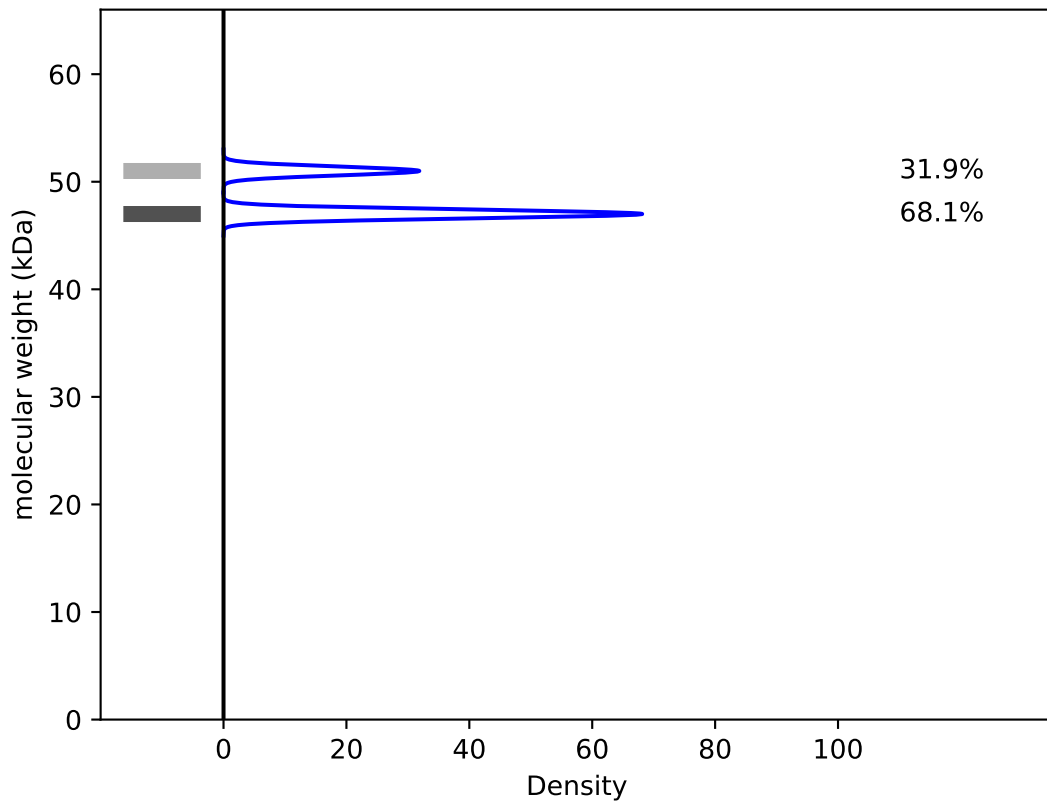

# Q66LE6



# Q9Y2T4



# P63241

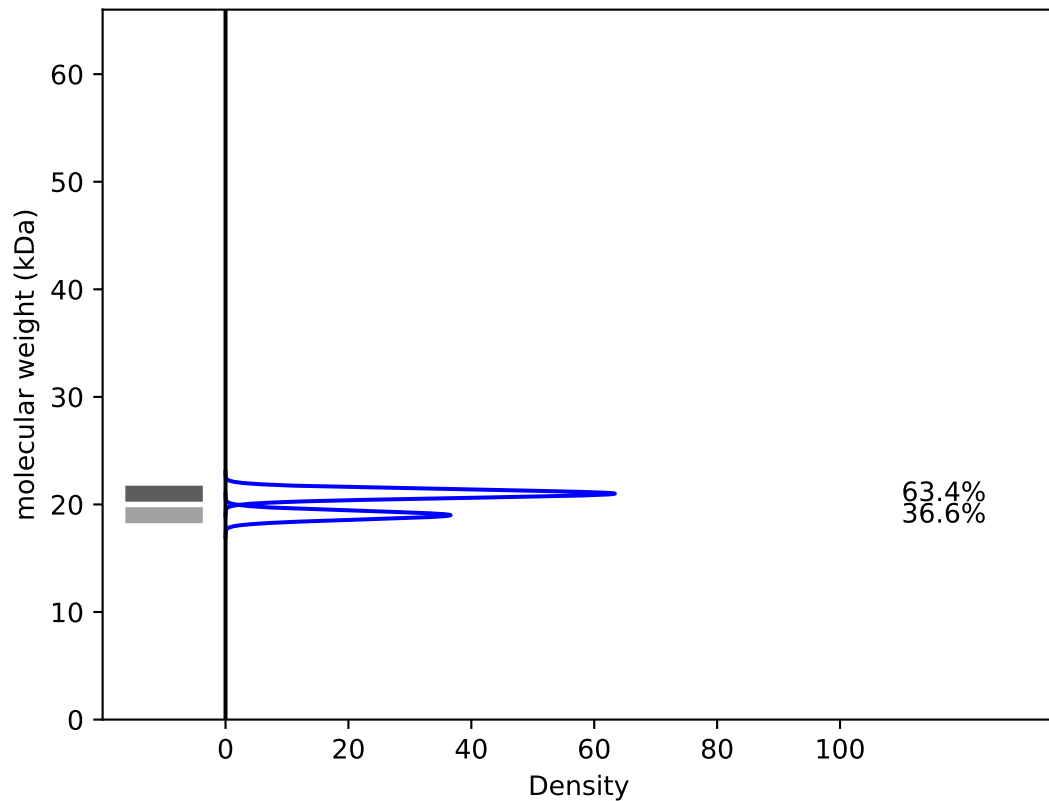

# Q9GZV4

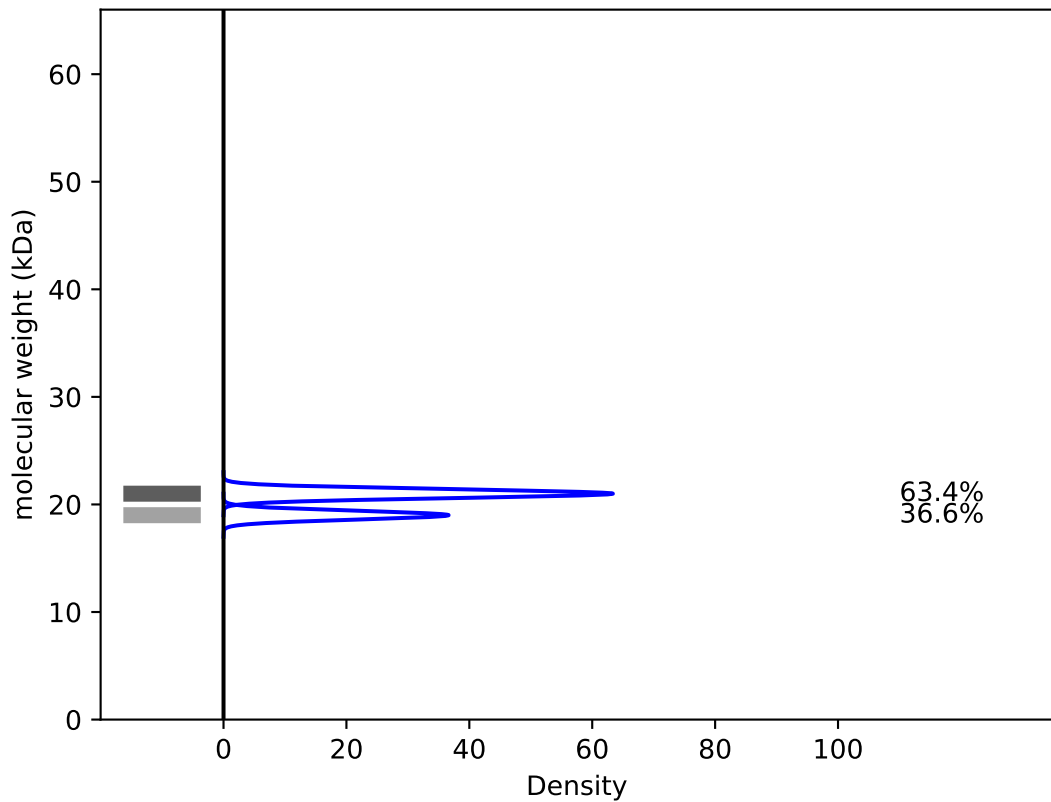

# Q6IS14

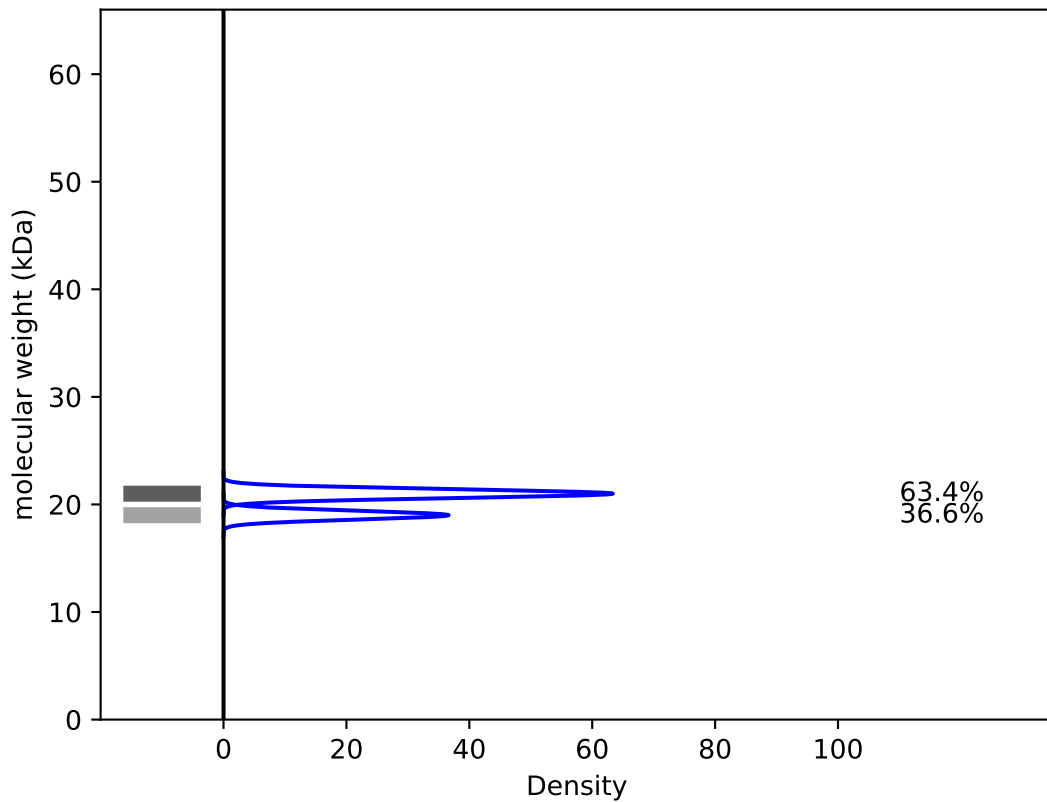

P63244



# P63261

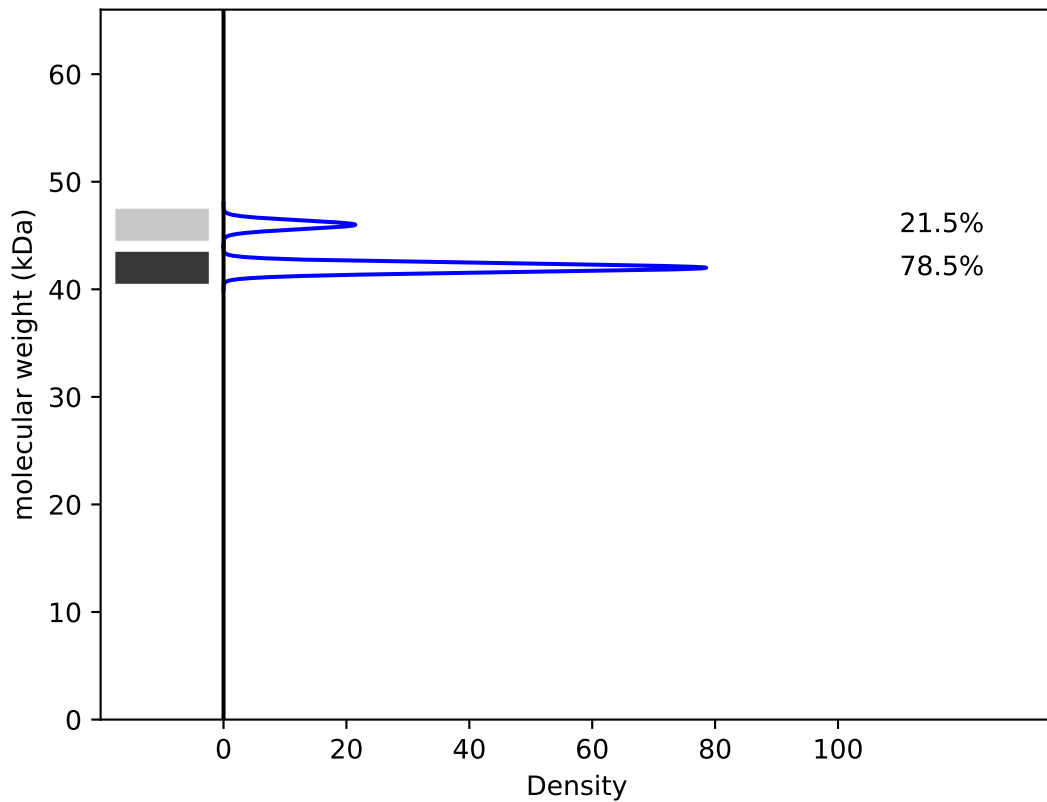



# P63279

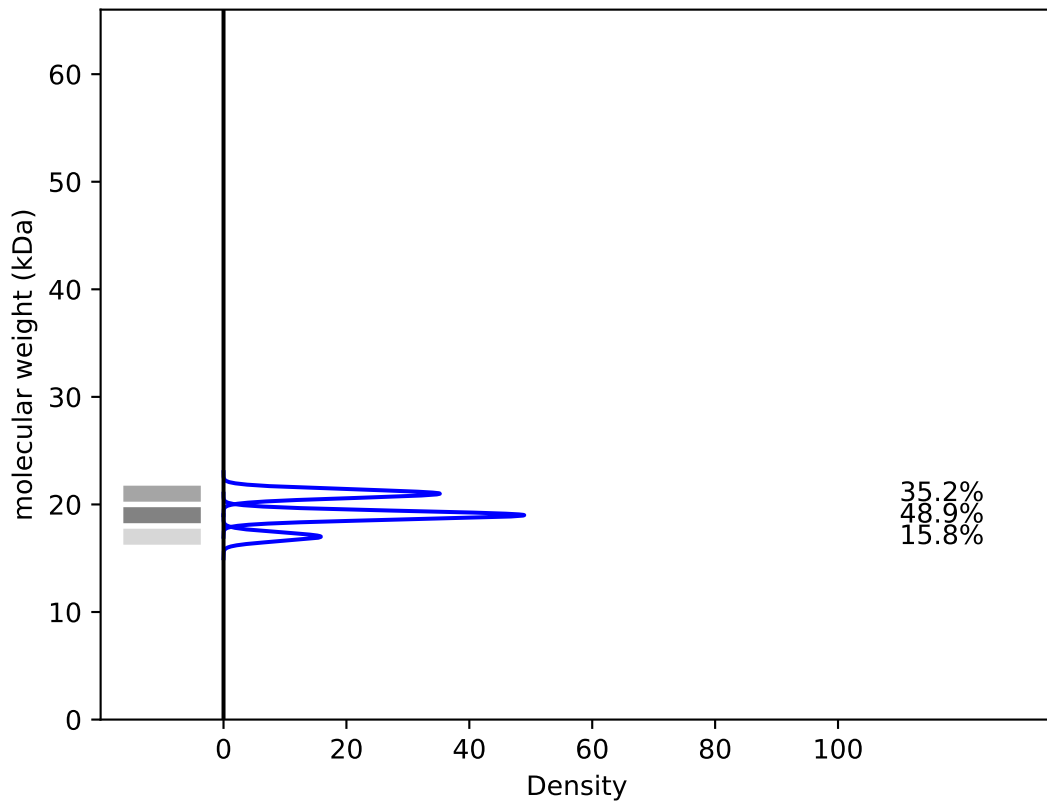

P67775



P62714



# P67809

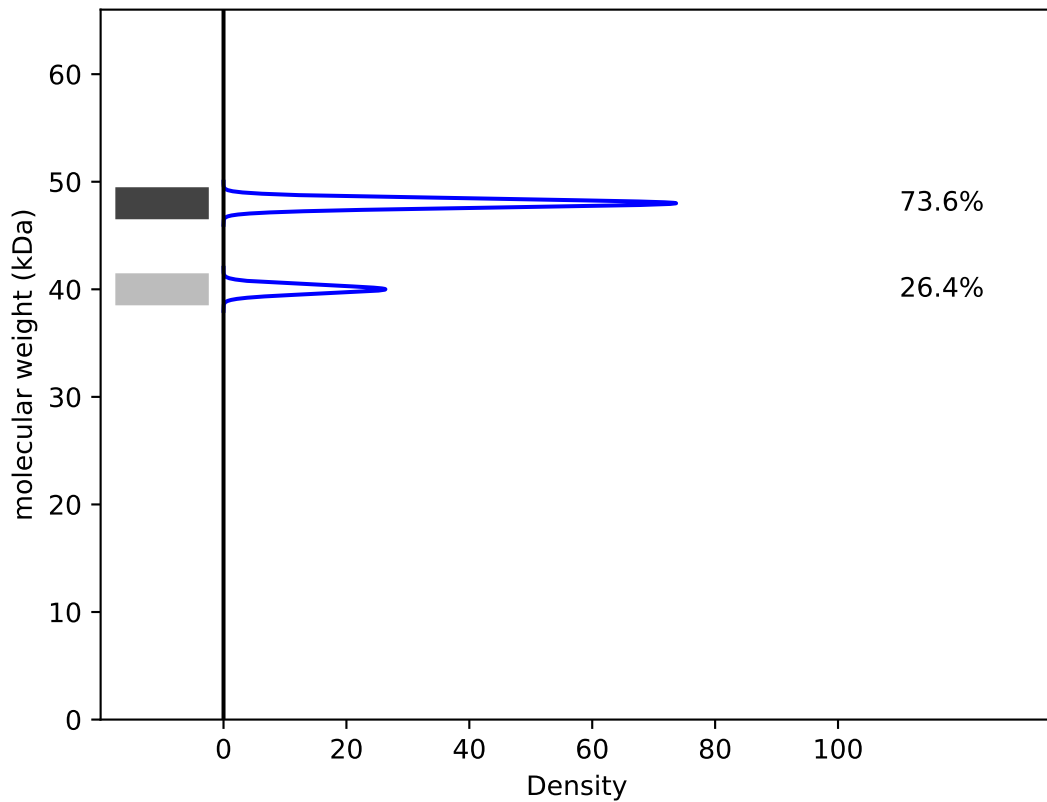

# Q9Y2T7



# P67870



P67936



# P68032

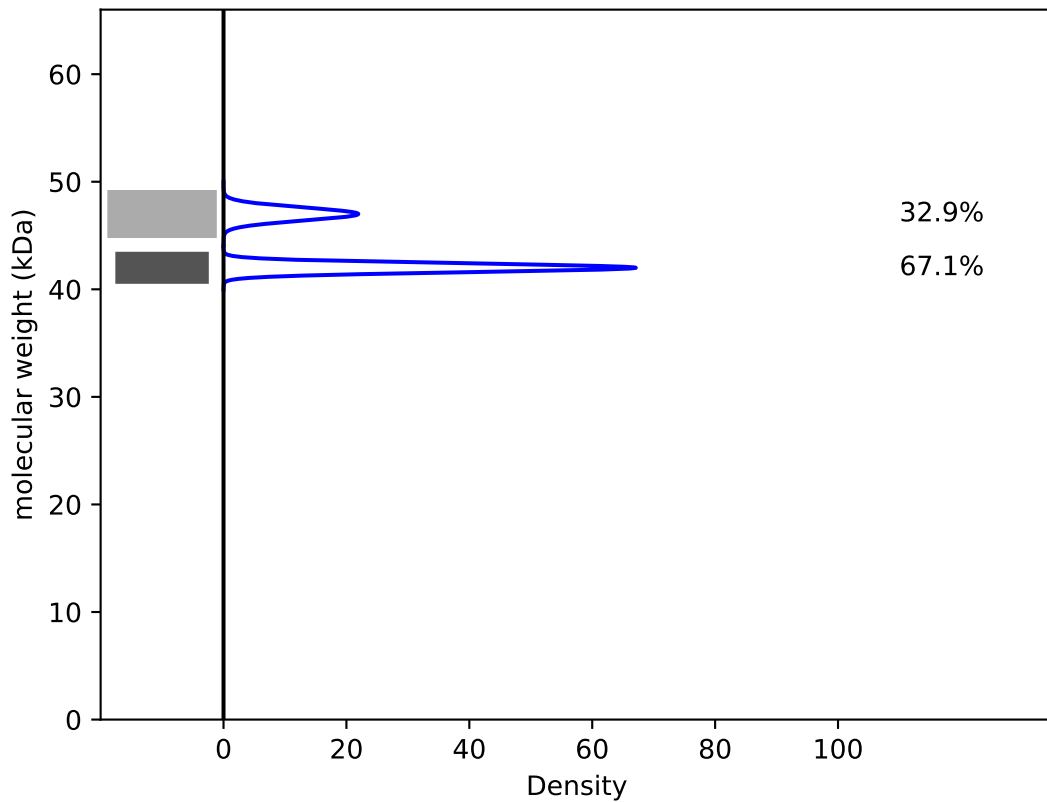



# P68133



# P63267



# P62736

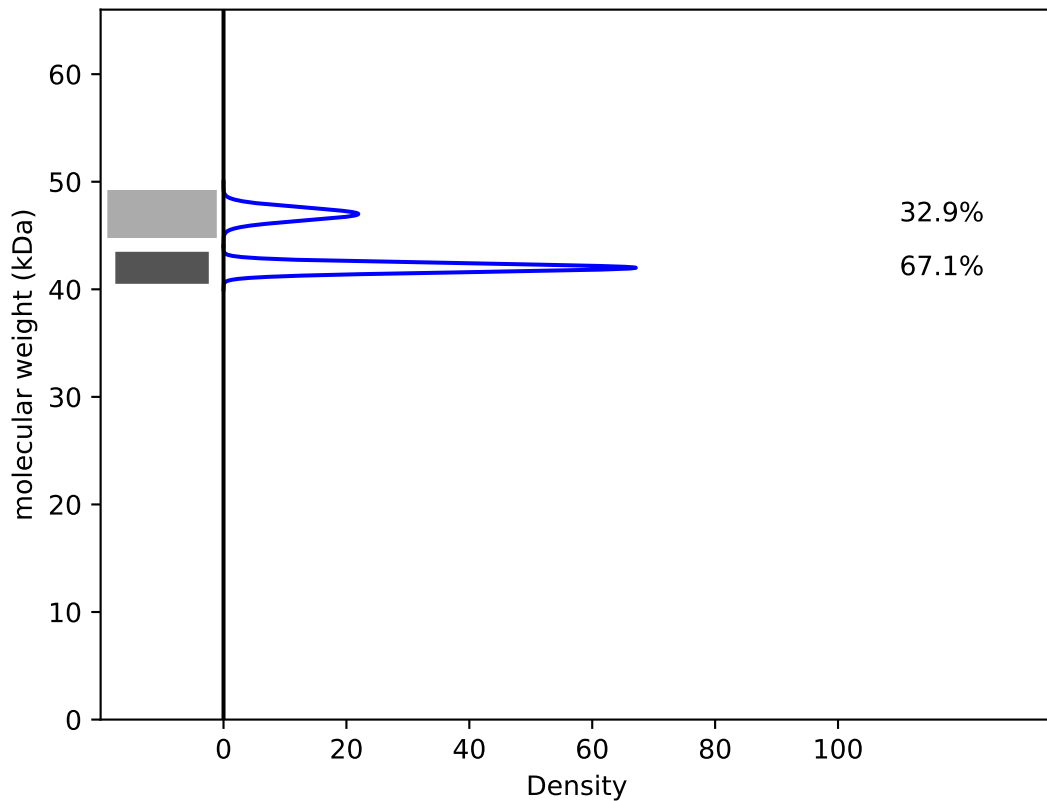

# P68036

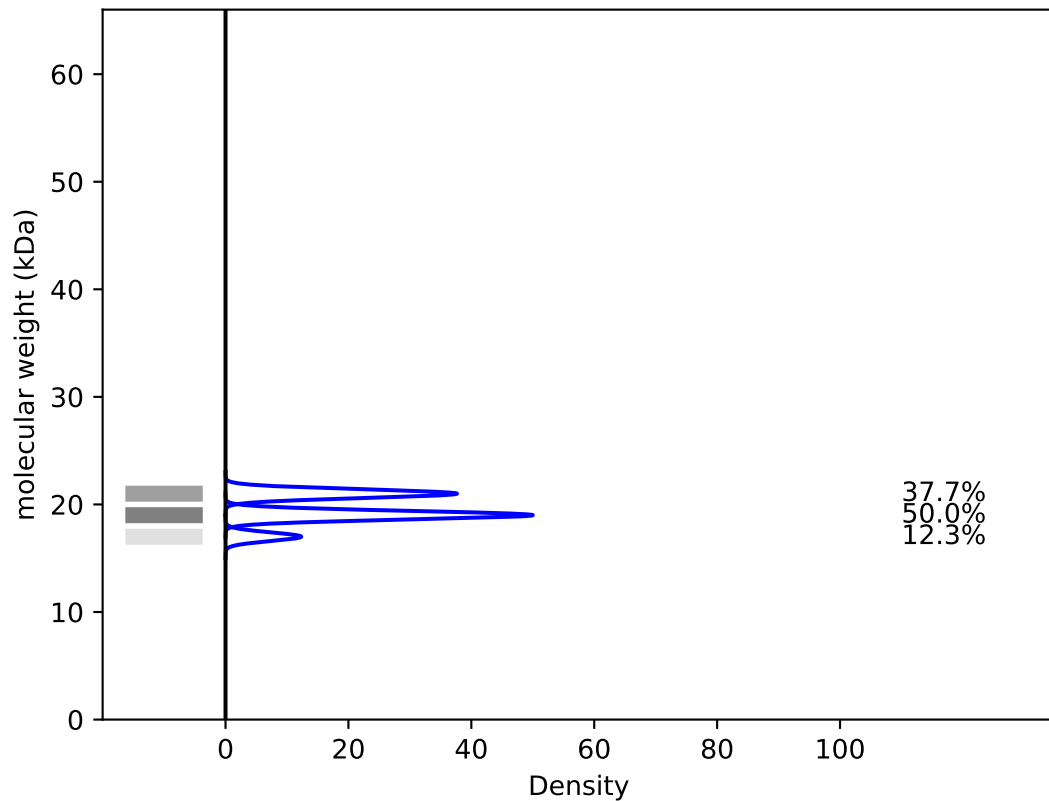

# P68104

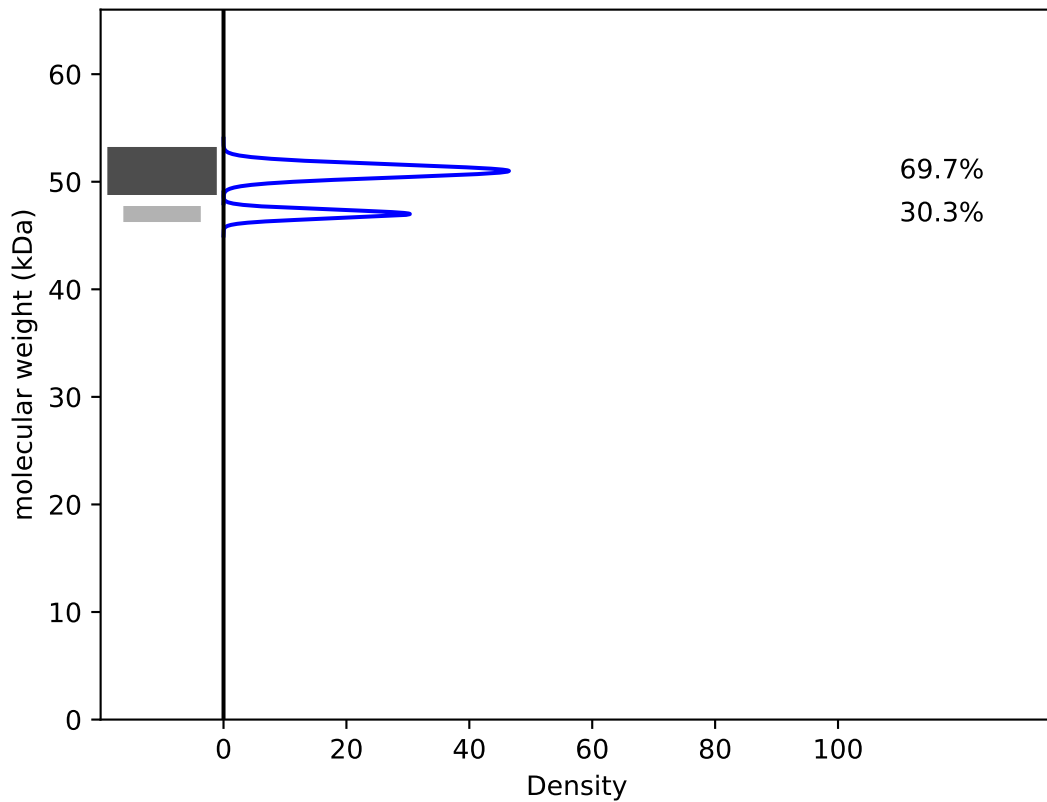

# Q5VTE0

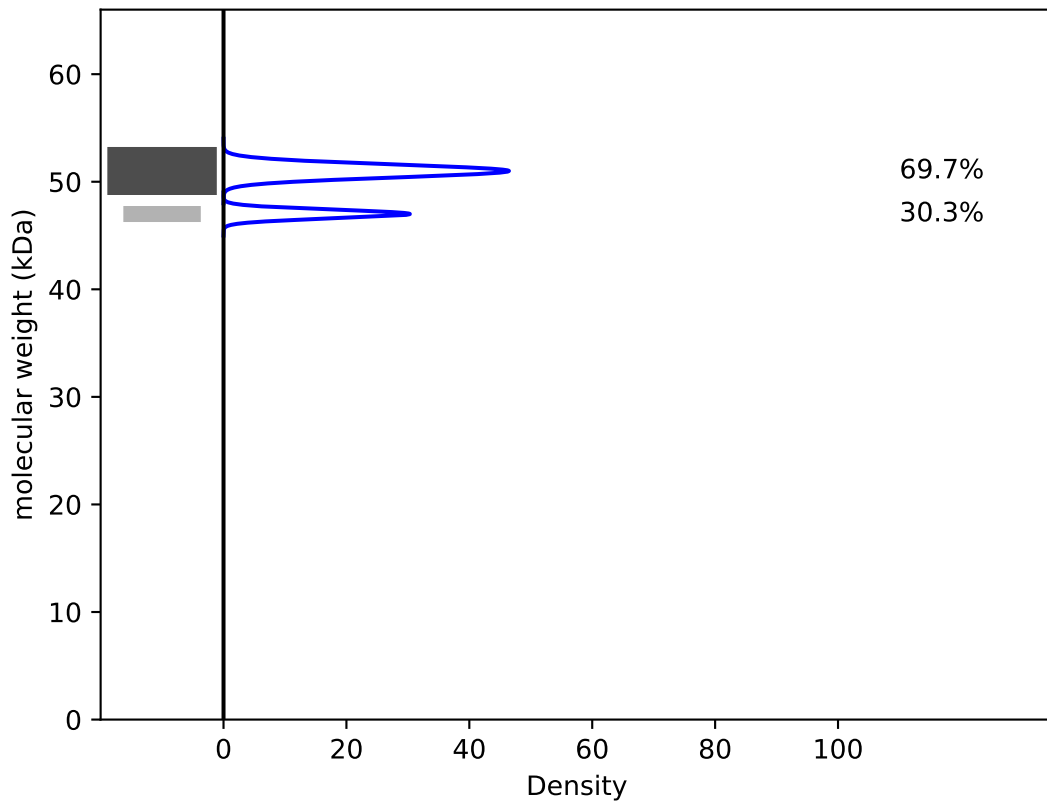

# P68363

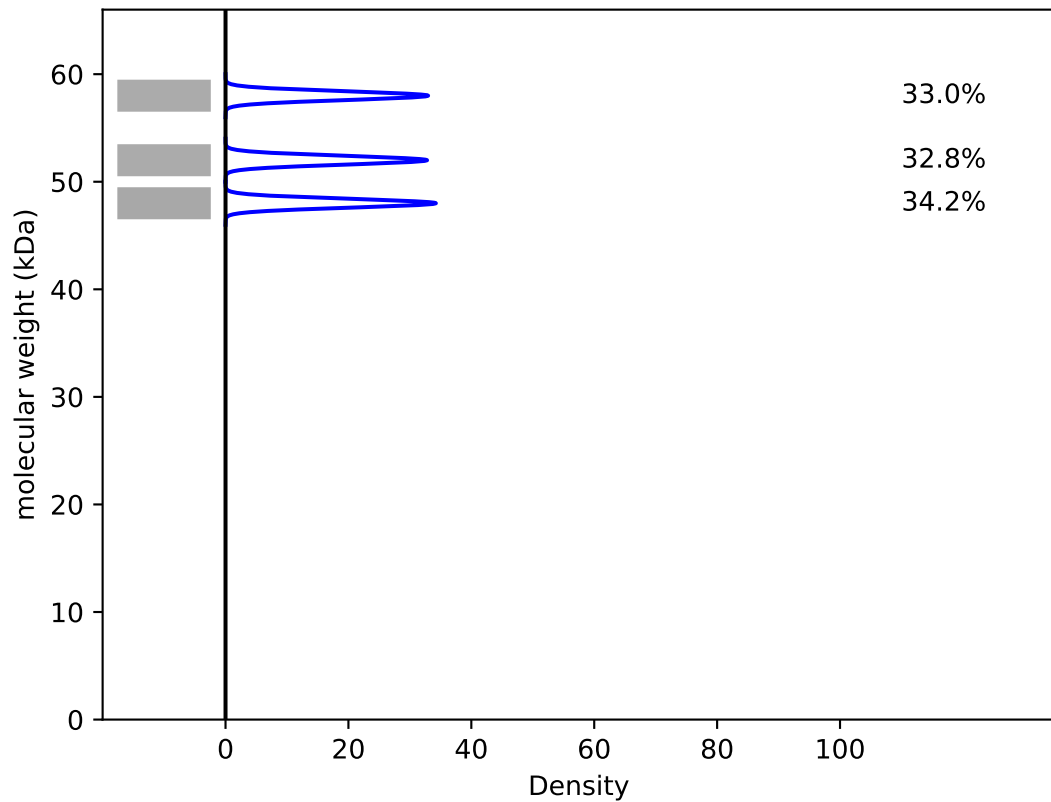

# A6NHL2

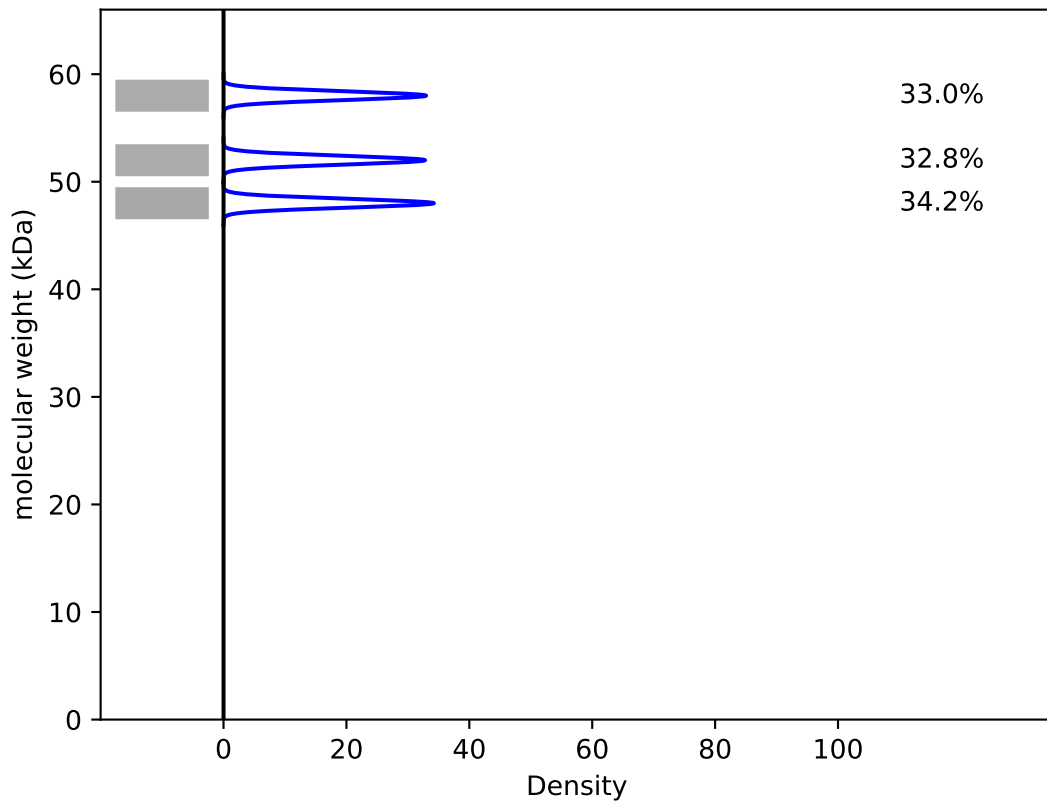



# P68366

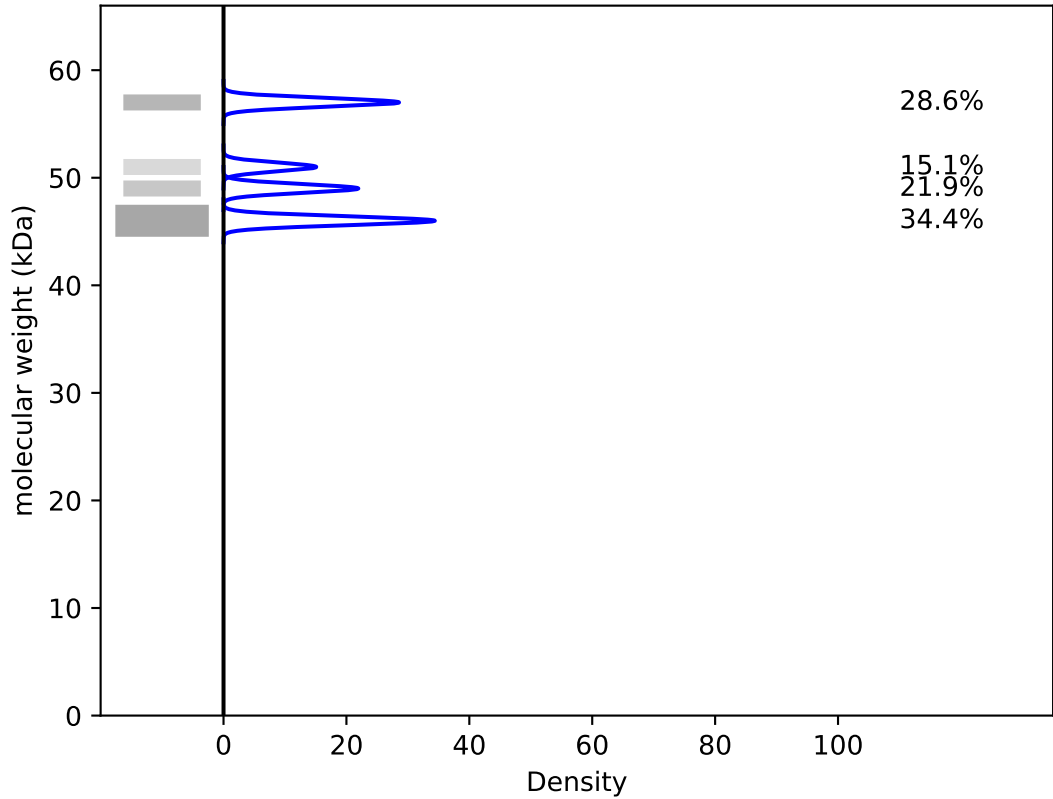

# P68371

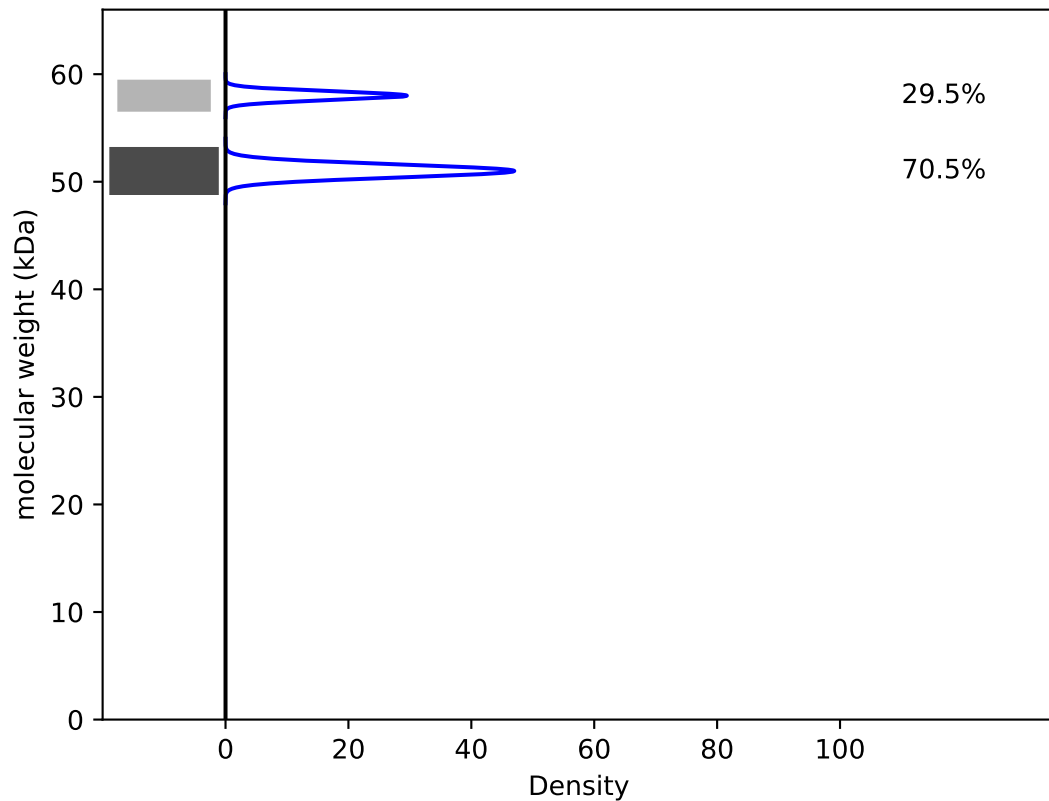

# P68400



# Q8NEV1



# P68402

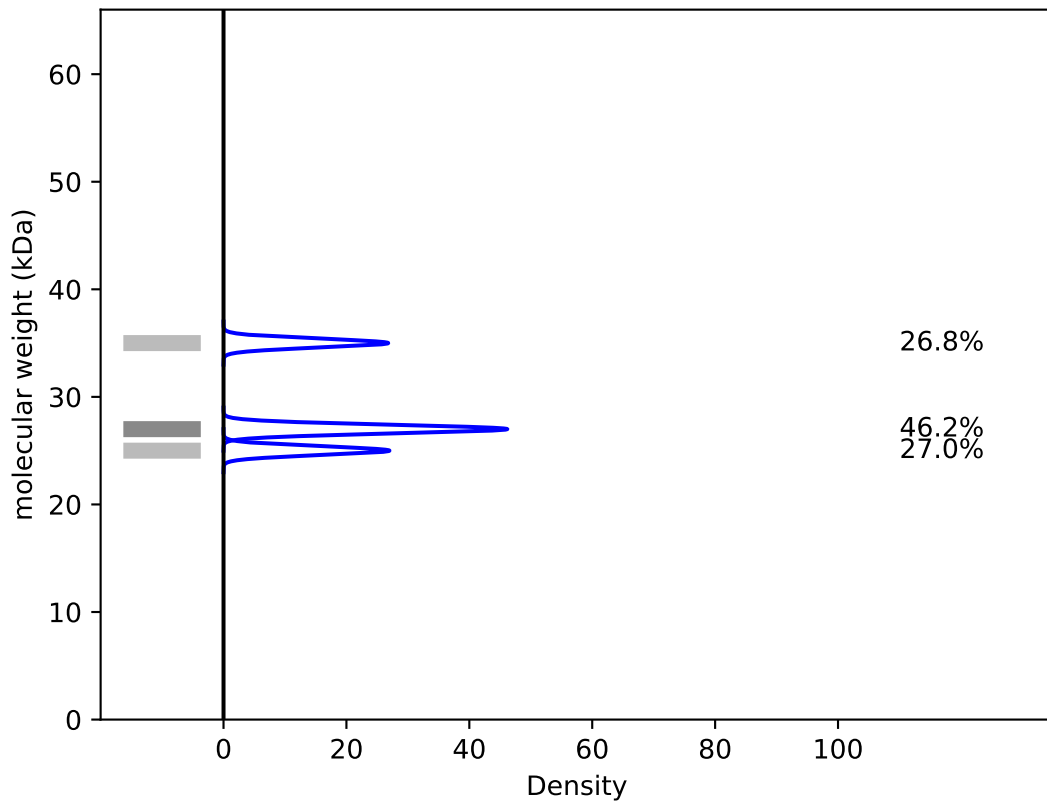

# Q71DI3

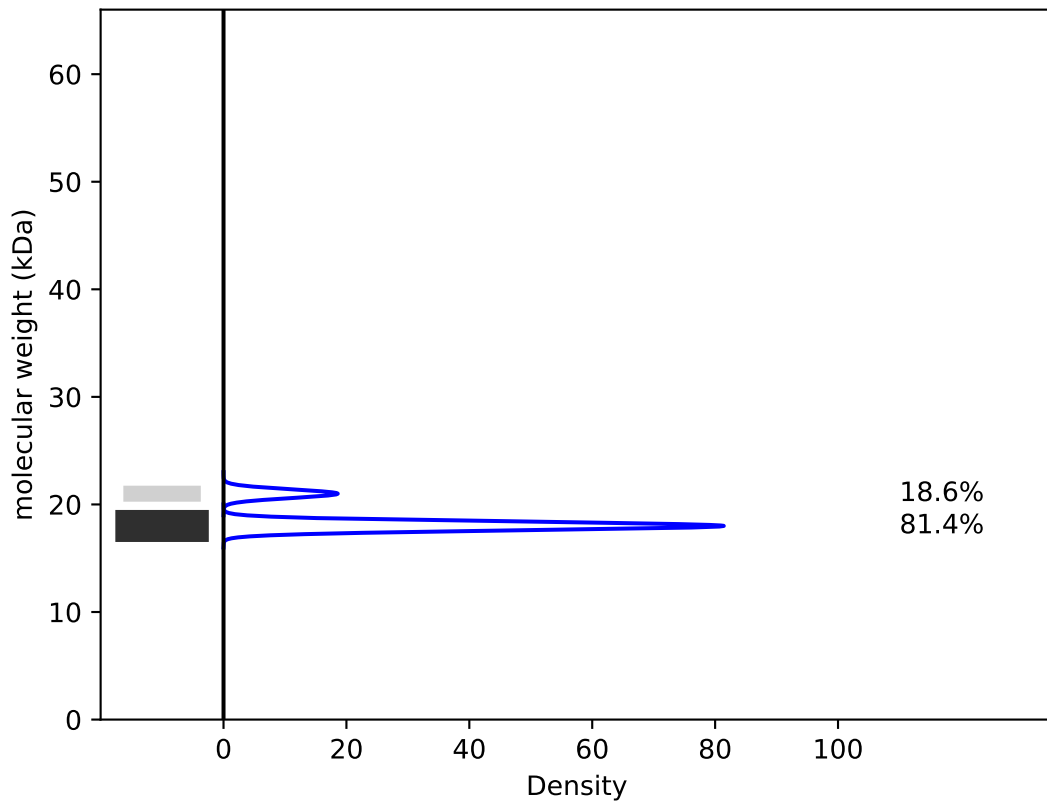

# Q16695

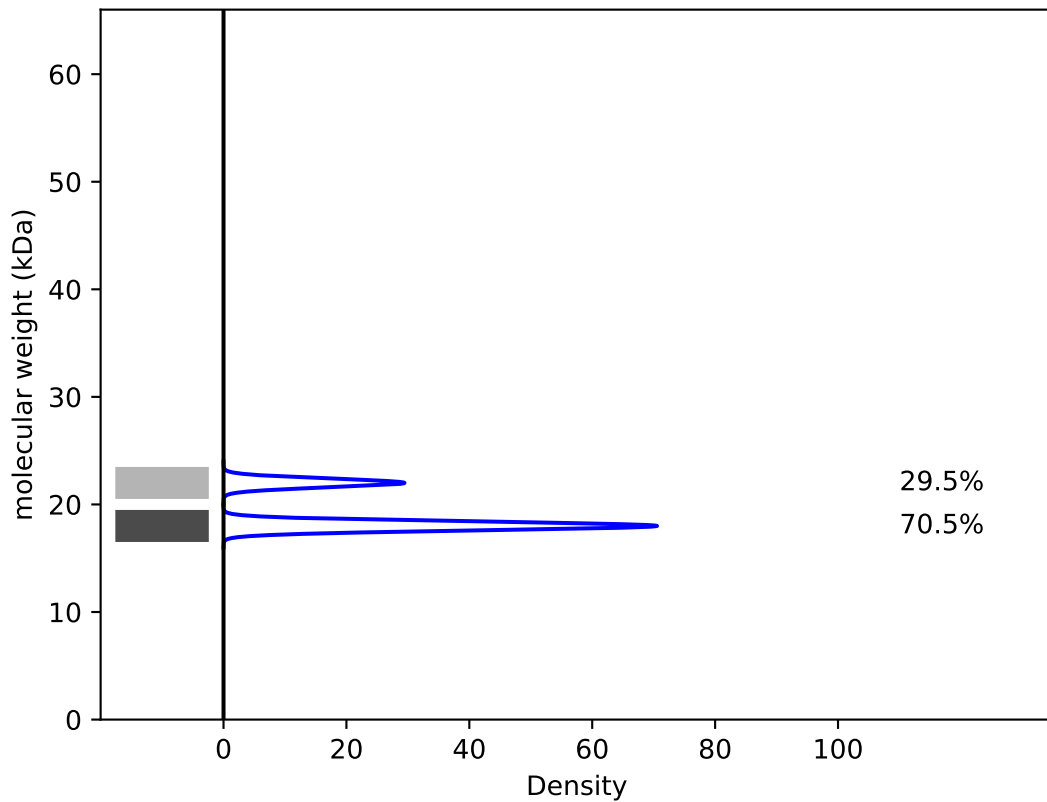

# P84243

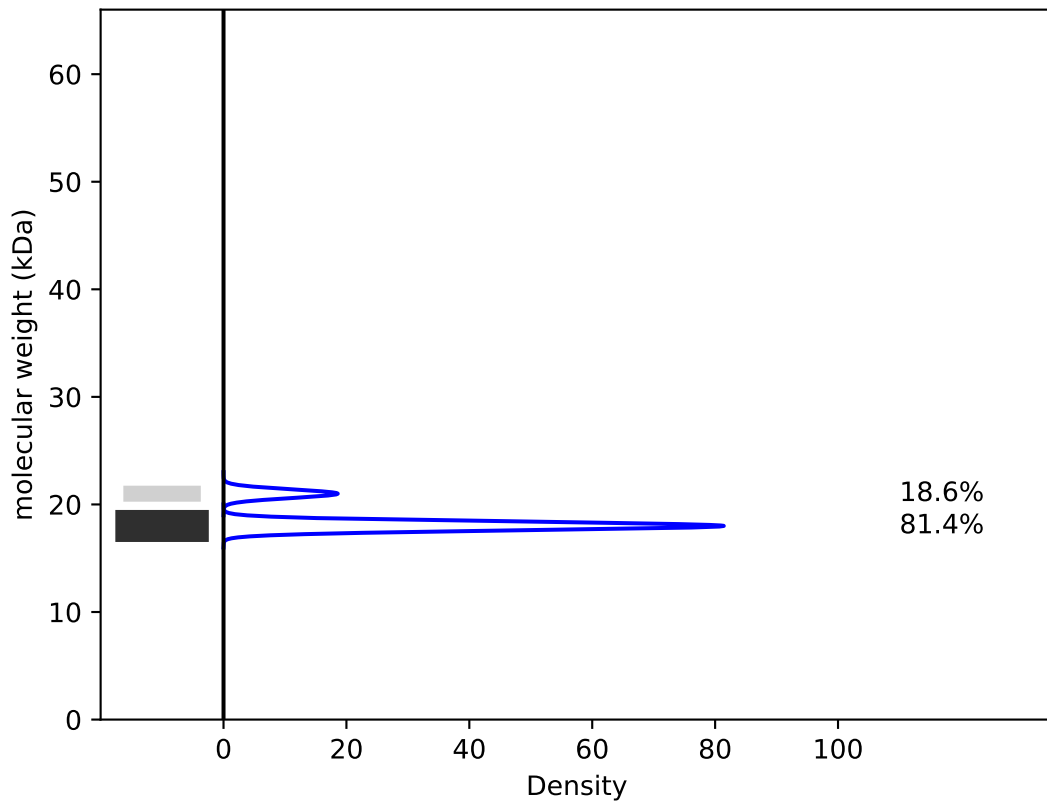



# P68431



# Q6NXT2



# P78330



# P78346

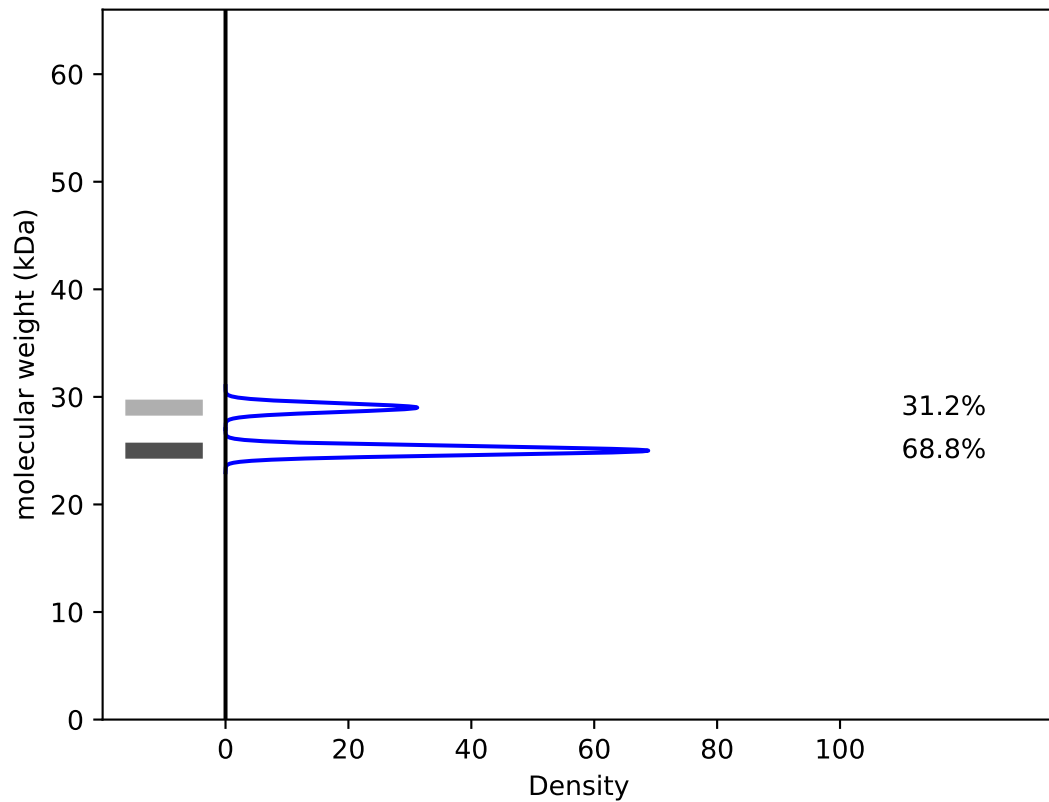

P78406



P78417



# P82650



P82663





# P82673

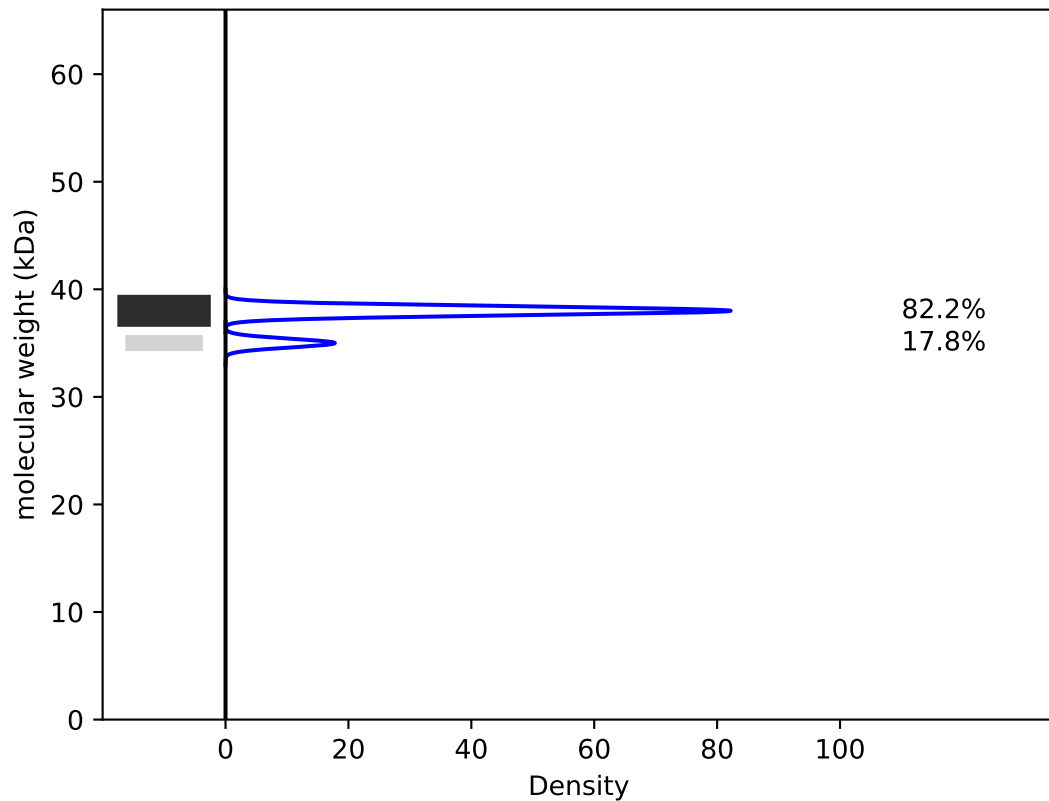

P82930



P82979



# P83731

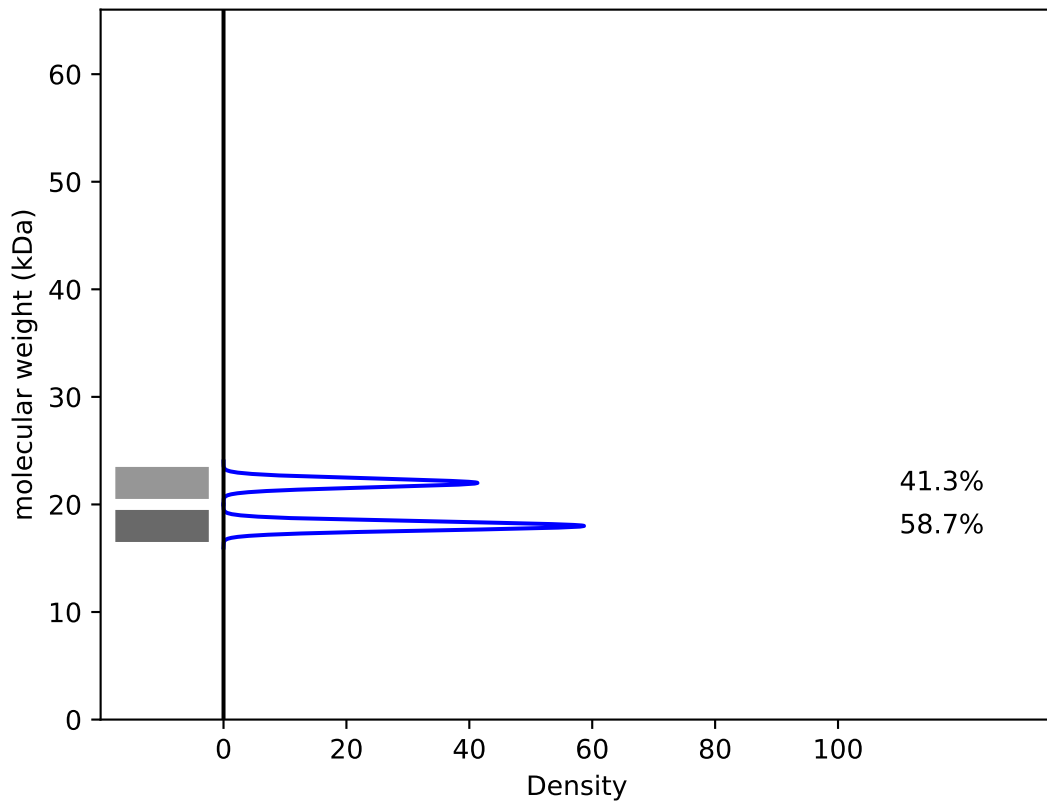

# P83916



# P84077

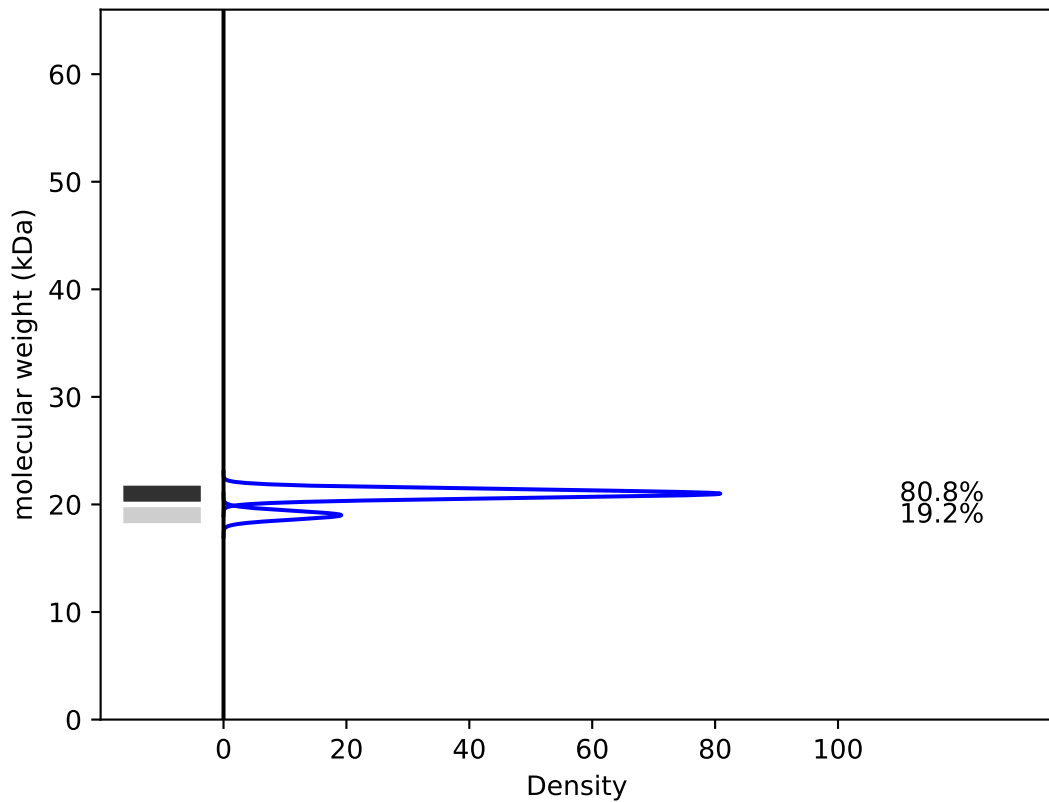

# P84085

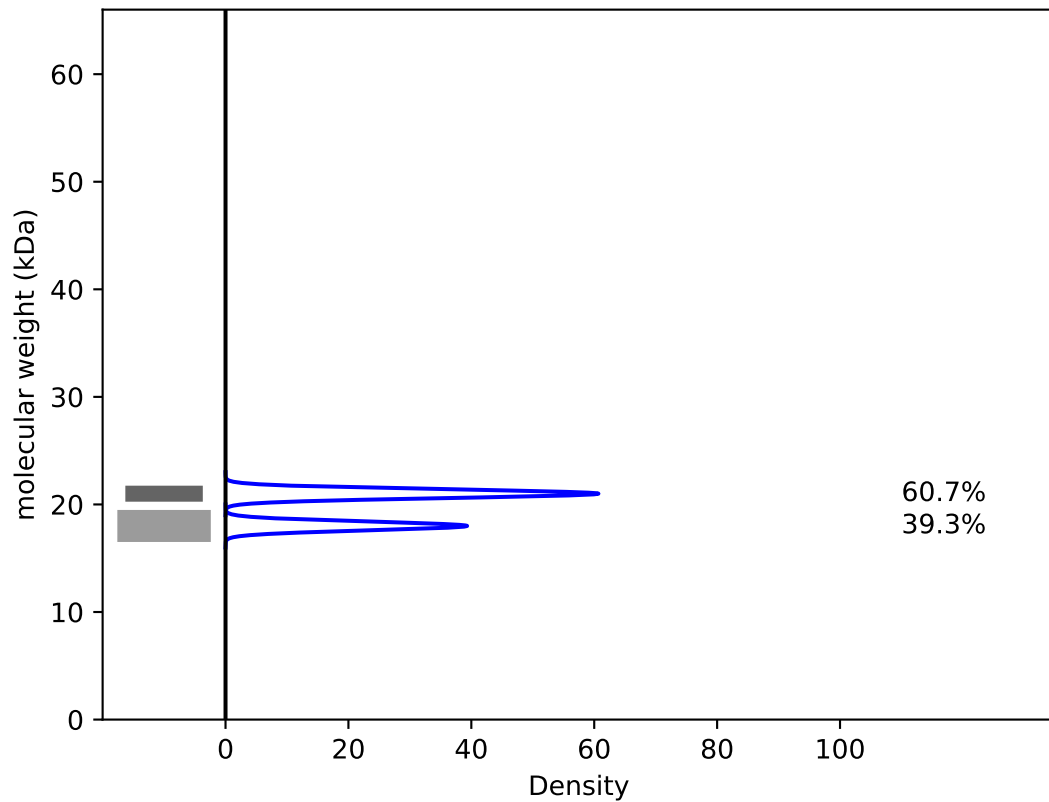

P84098





# P84103

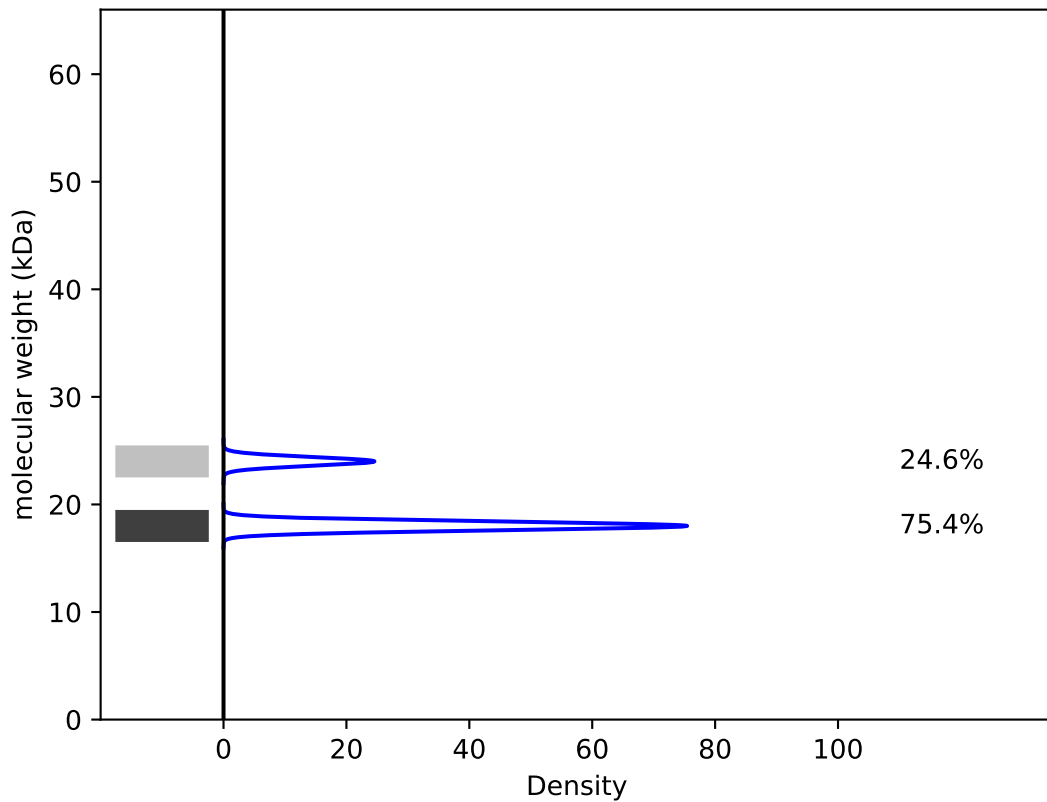

Q00325



Q00577

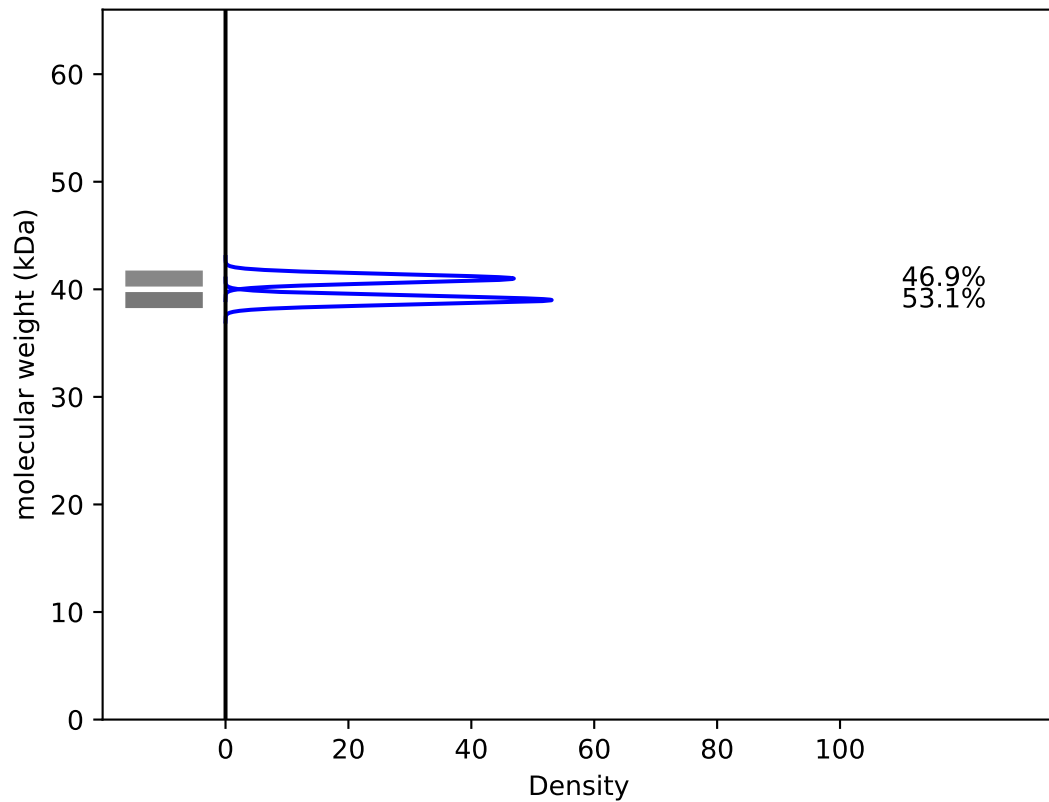

Q00688



Q00765

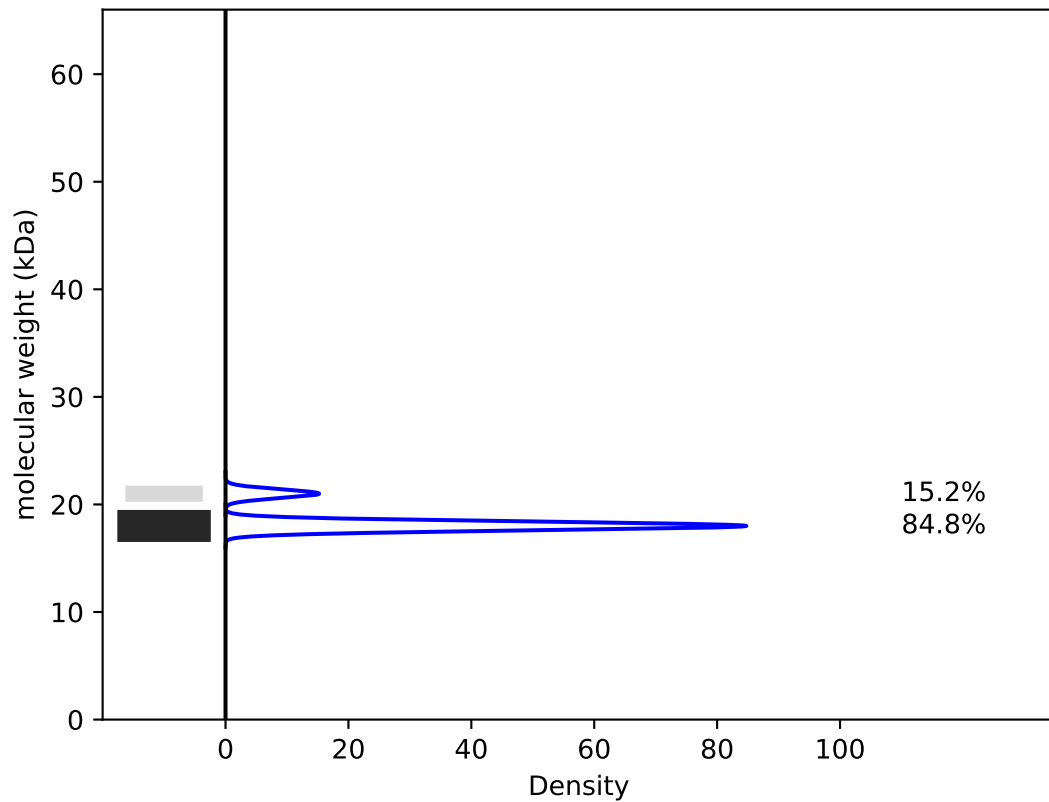

# Q00796

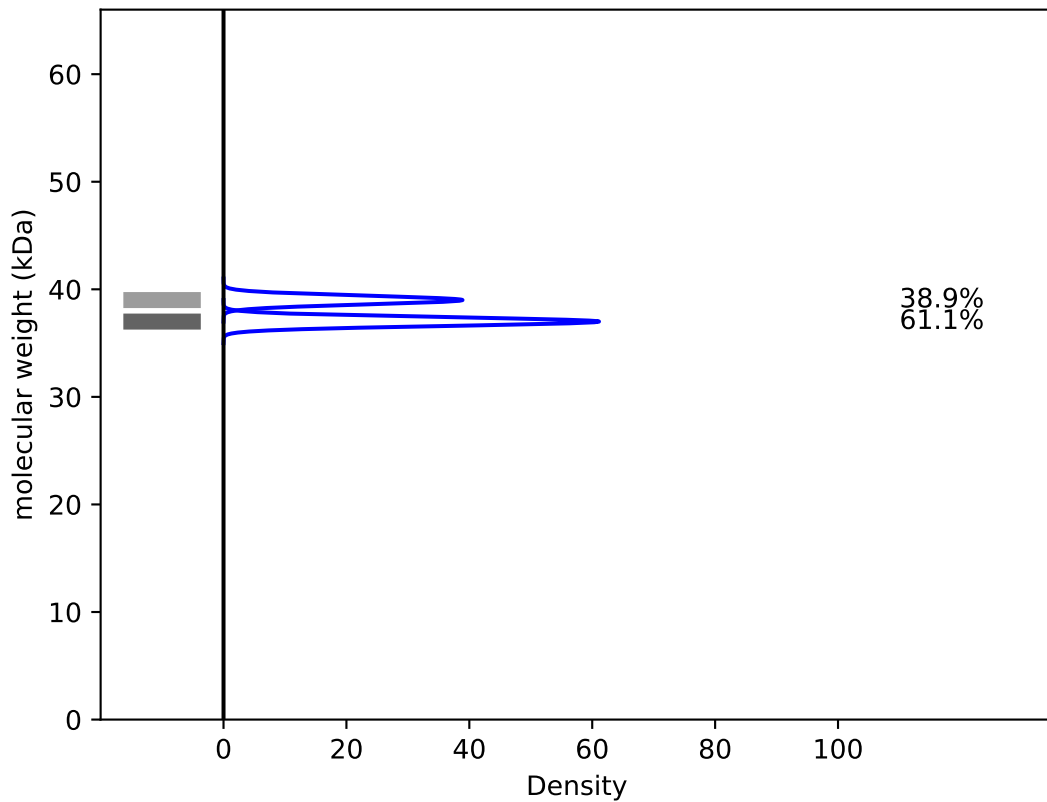

# Q01085

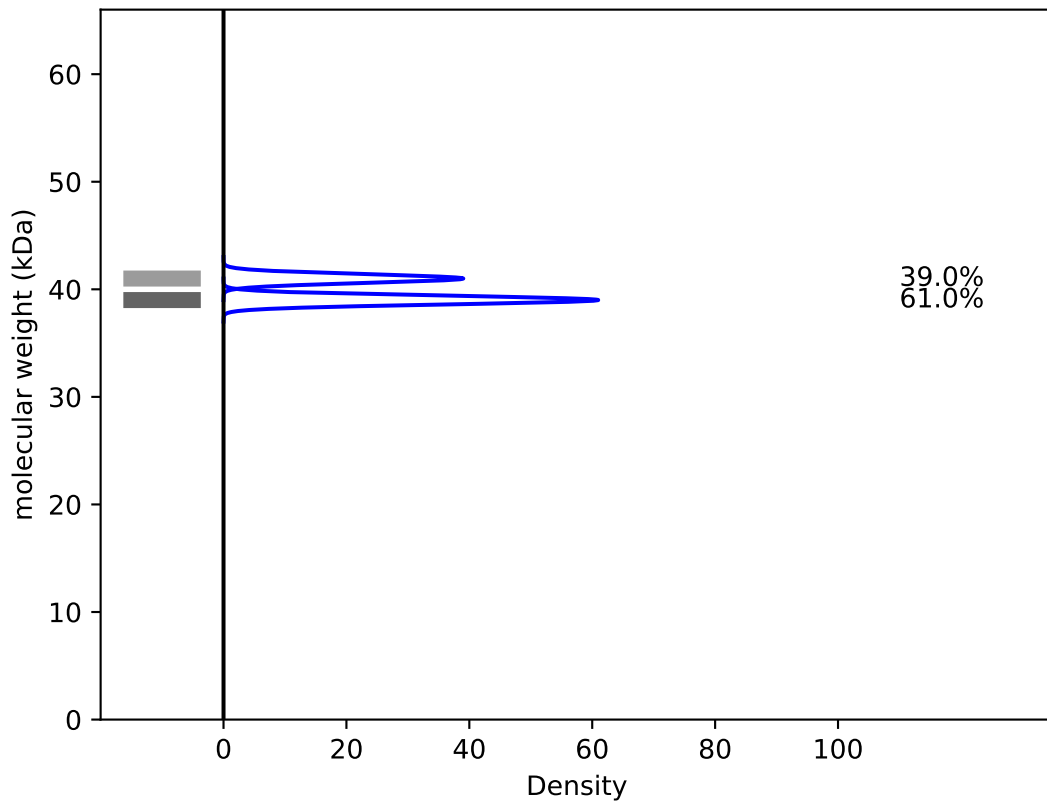

# Q01105

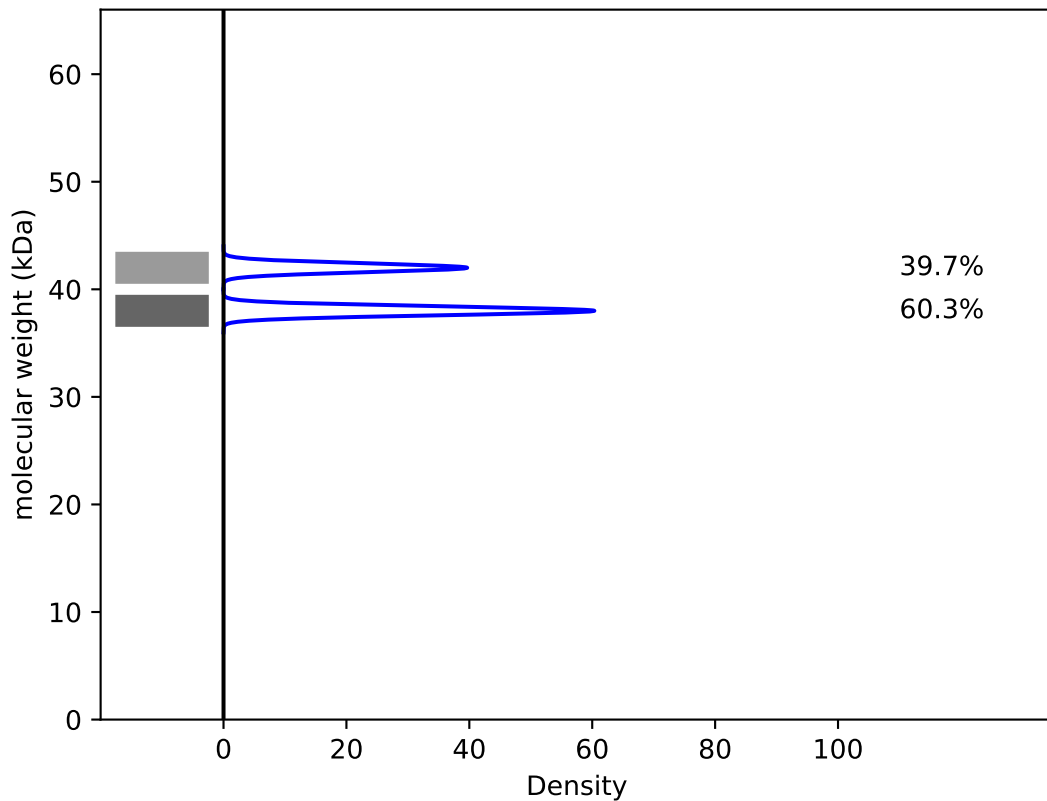



# PODME0

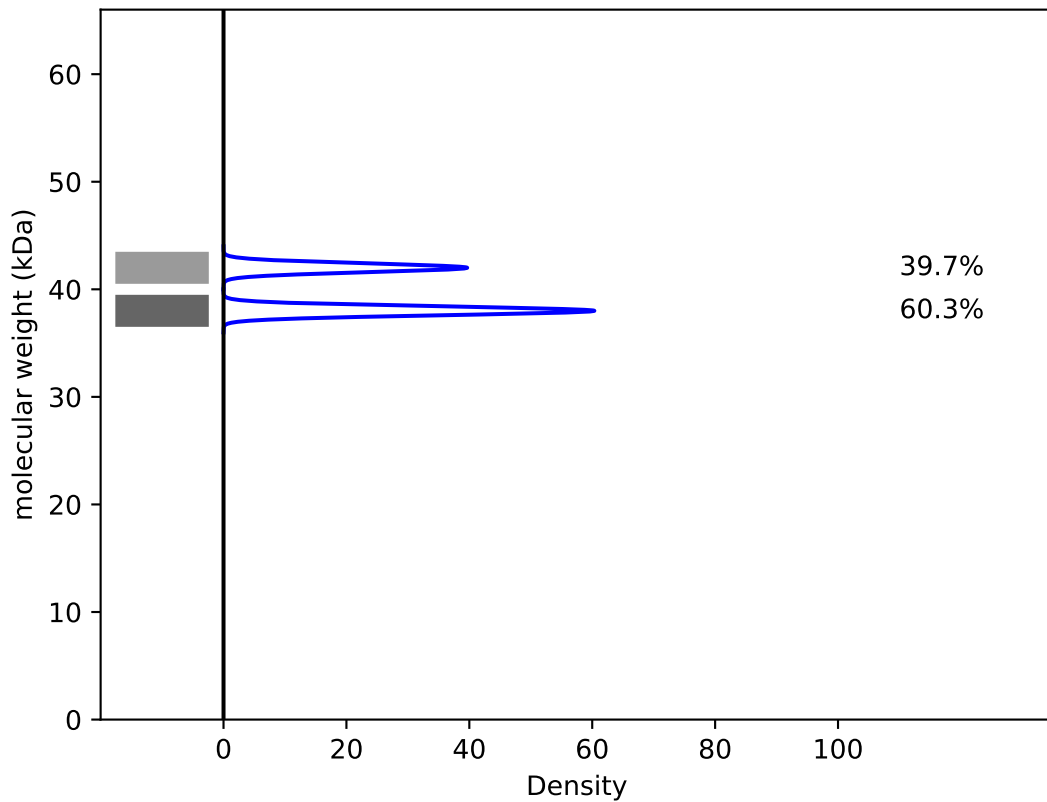

Q01130



# Q9BRL6



# Q01518

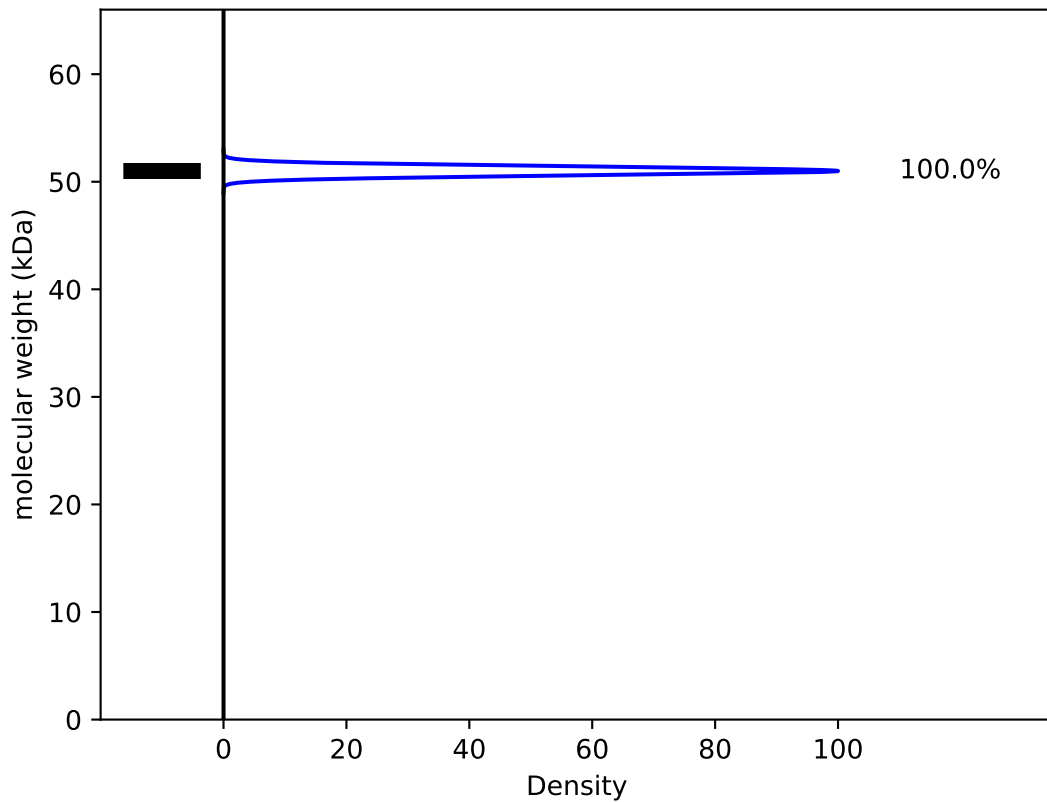

# Q01581



Q02127

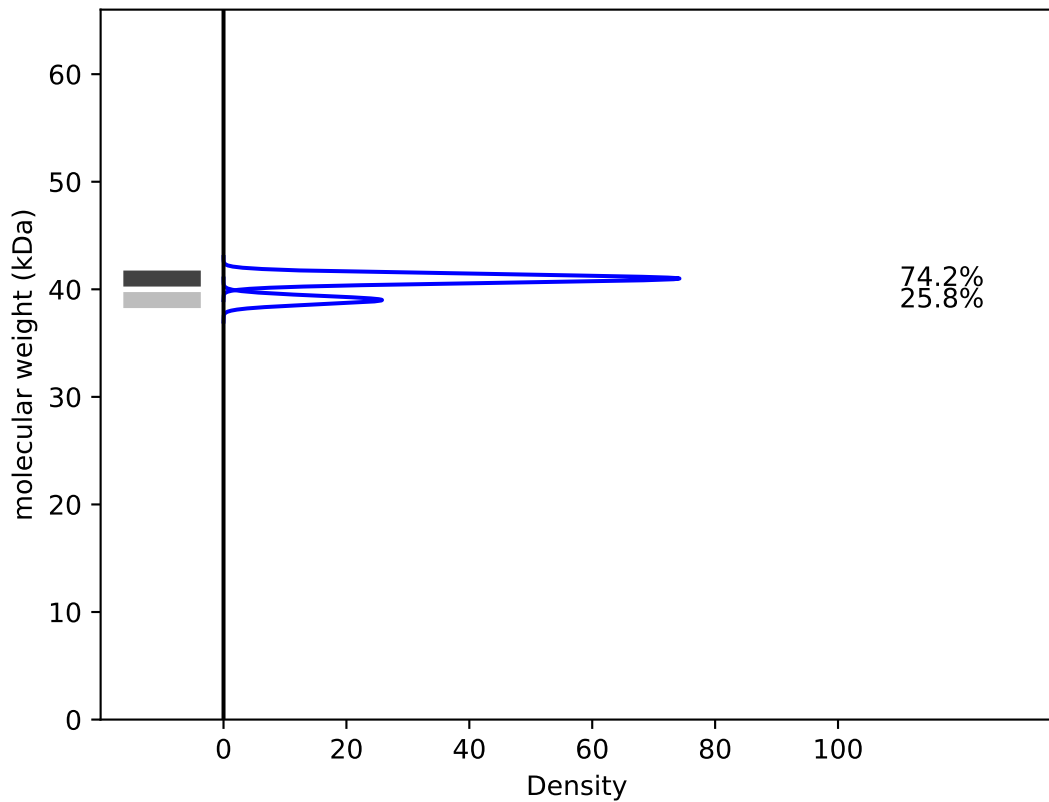

Q02543

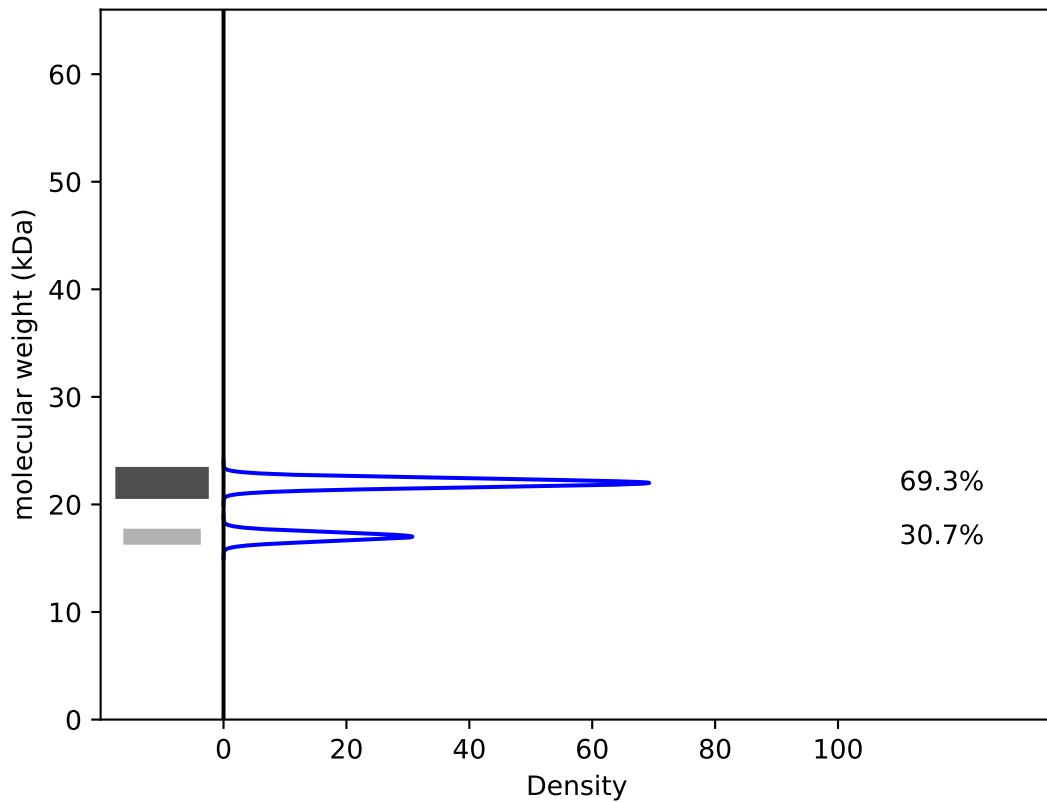

Q02790





Q02878



Q02978



Q04917

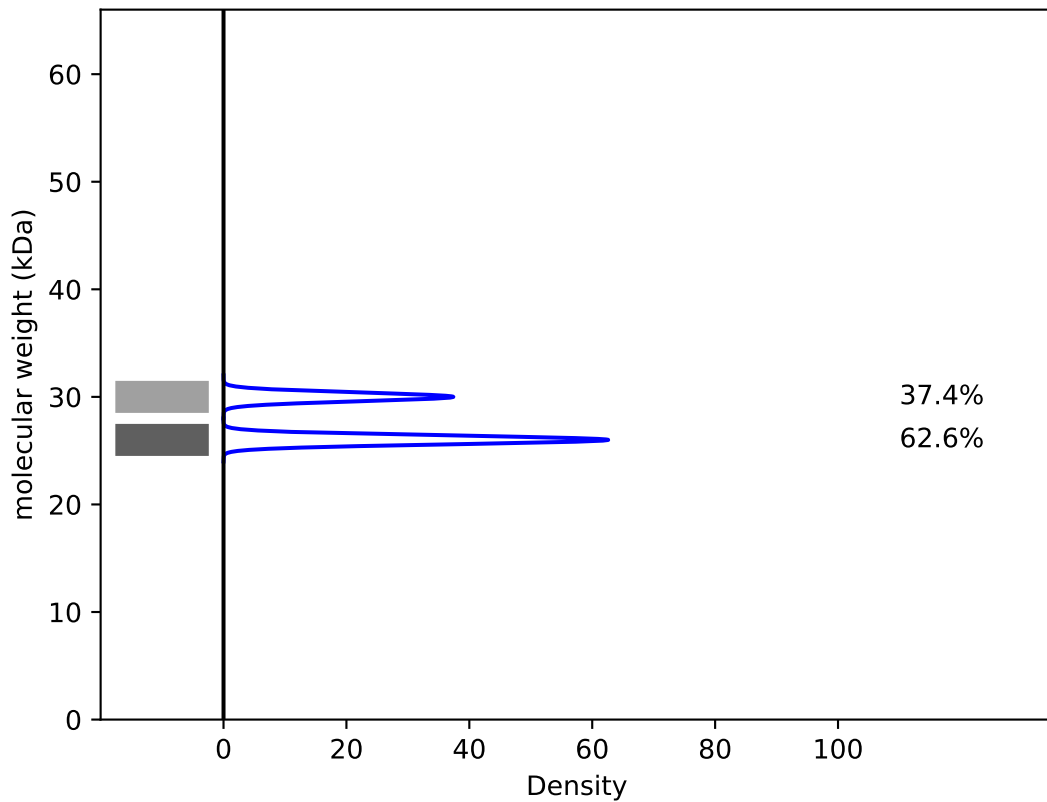

Q05048



Q05639



# Q06323

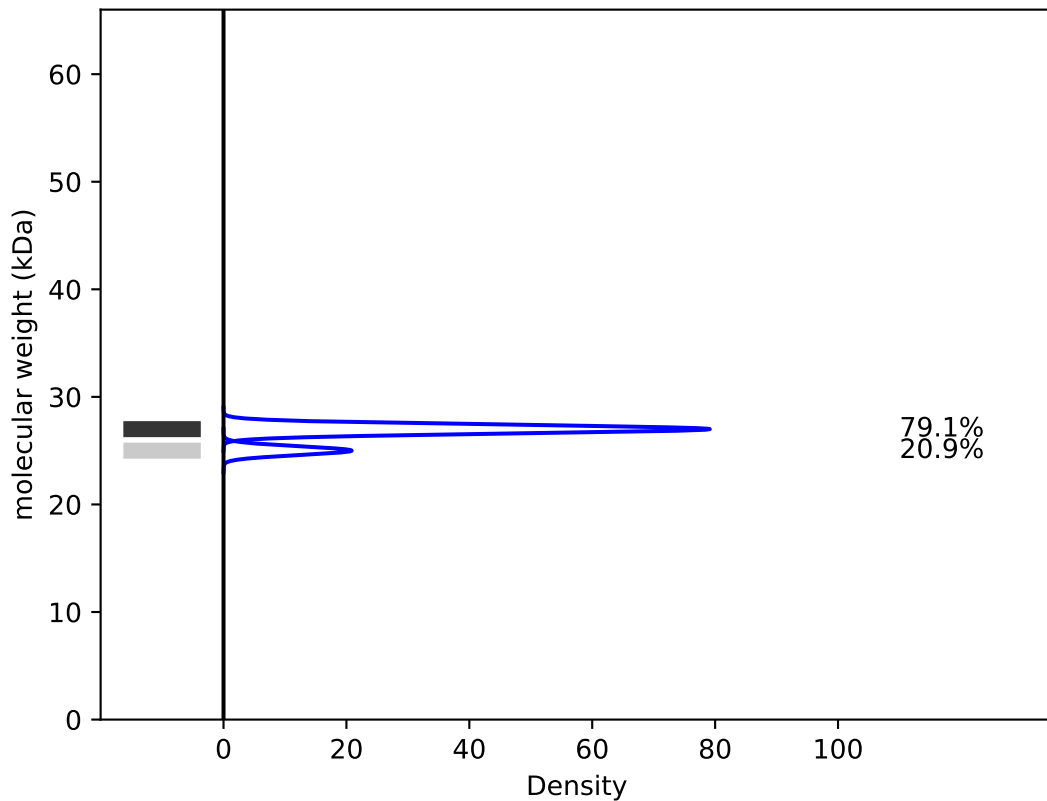

Q06830



Q07020





Q07021



Q07812



Q07955



Q07960



Q08257



# Q08752

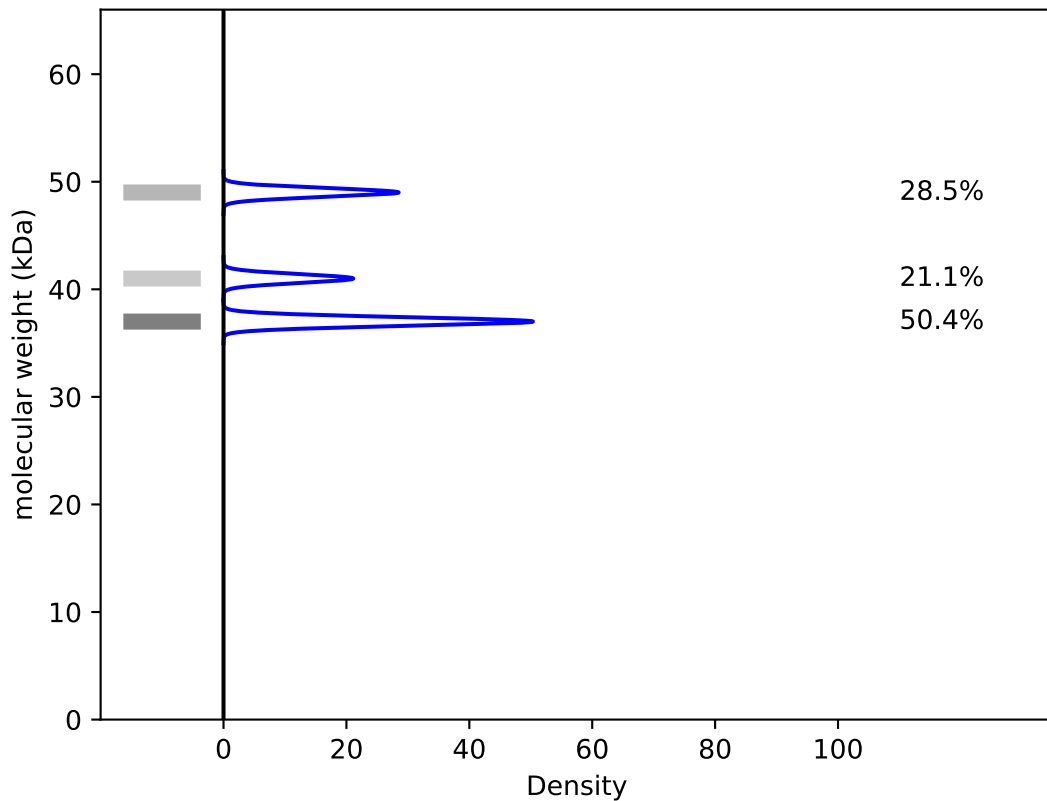

Q09028



# Q10589

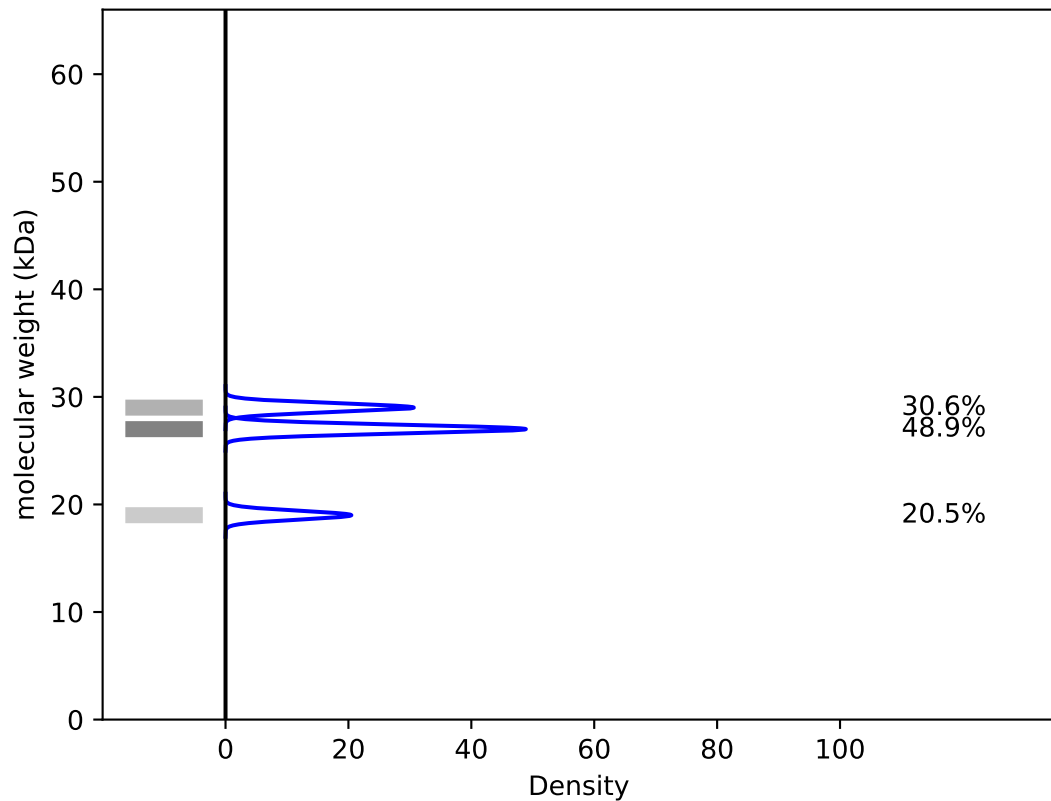



# Q12792



# Q12846



Q12849



# Q12904



# Q12905



# Q12972



# Q12974

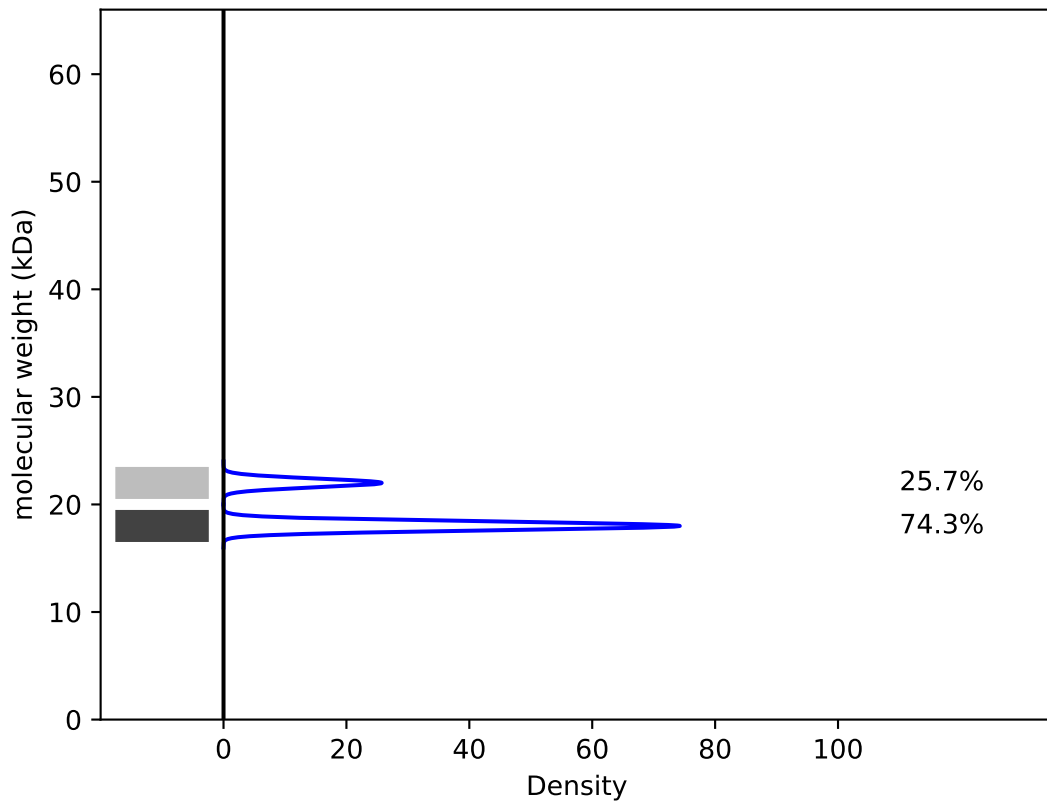

# Q93096

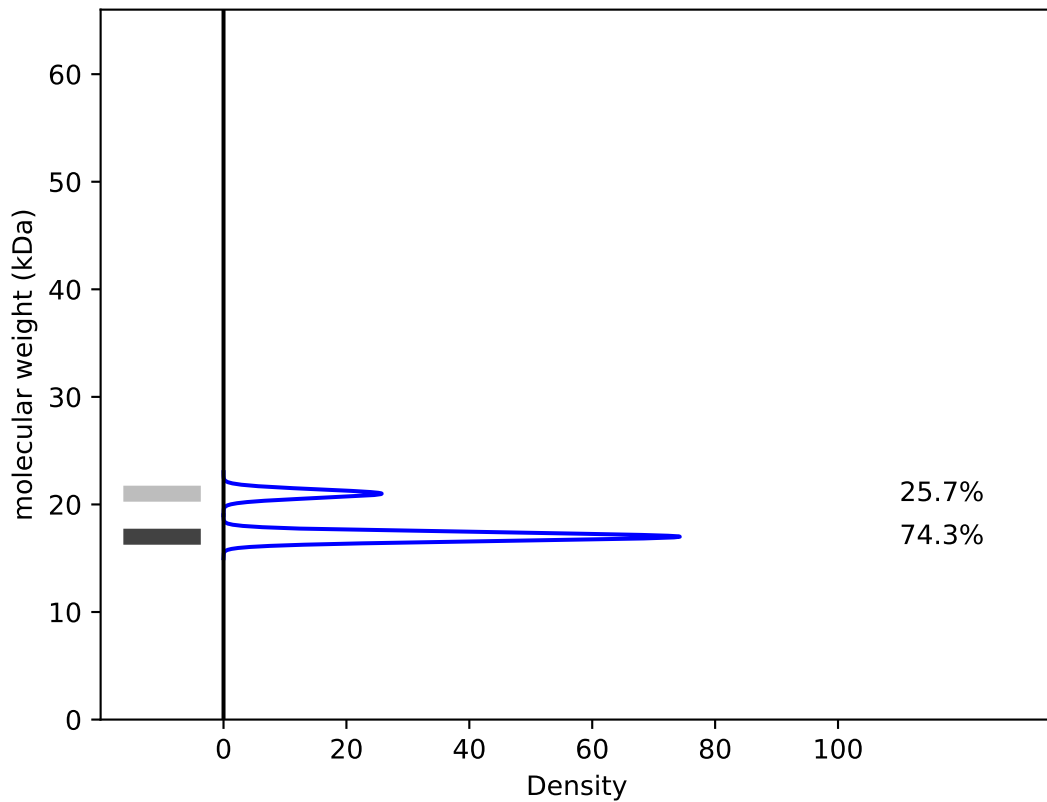



Q13084



# Q13098



# Q13126



# Q13148

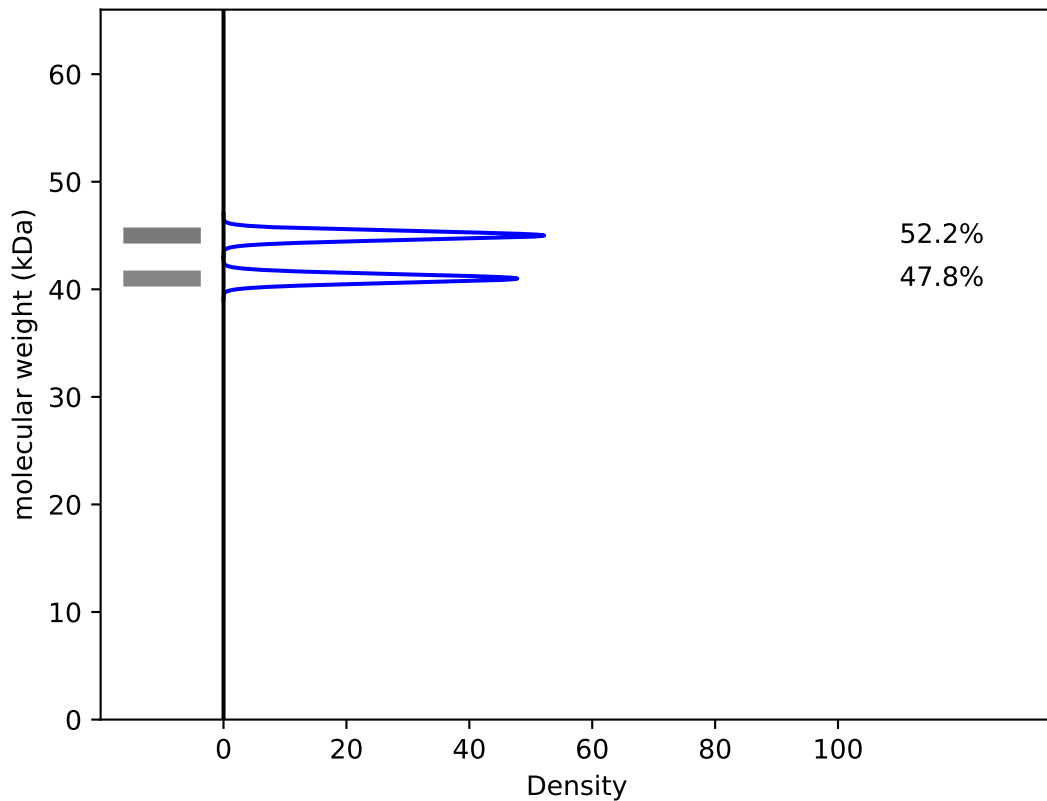

# Q13151



# Q13155

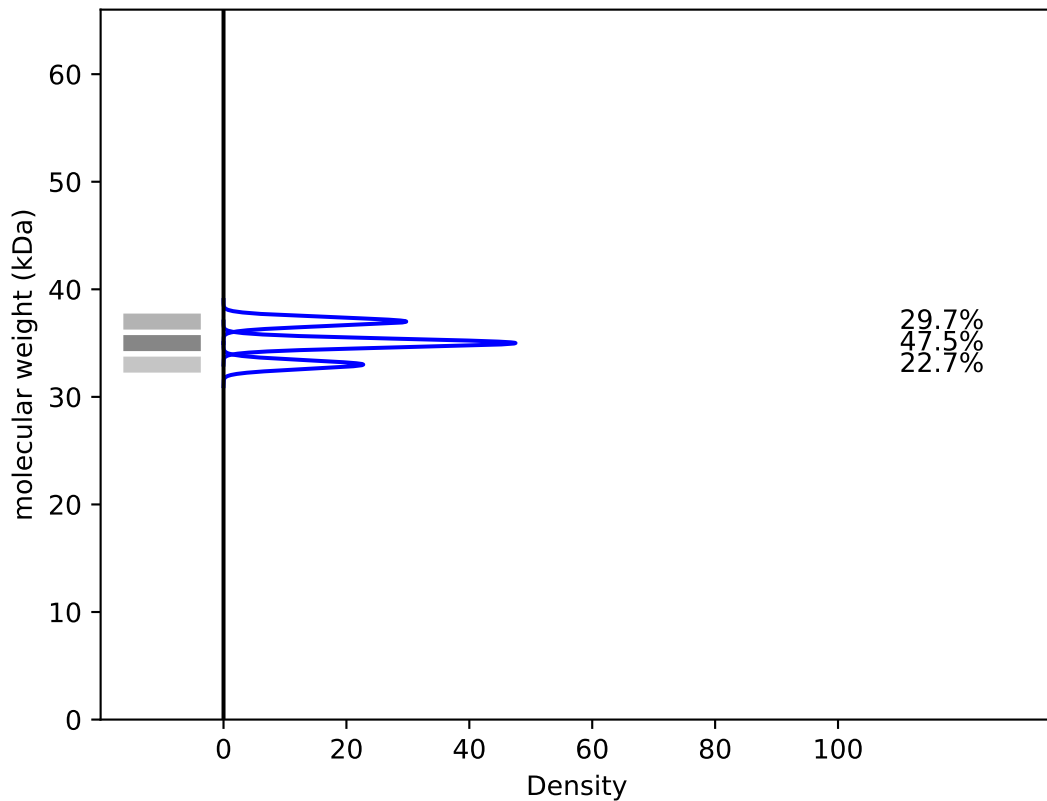

# Q13177



# Q13153





# Q13185

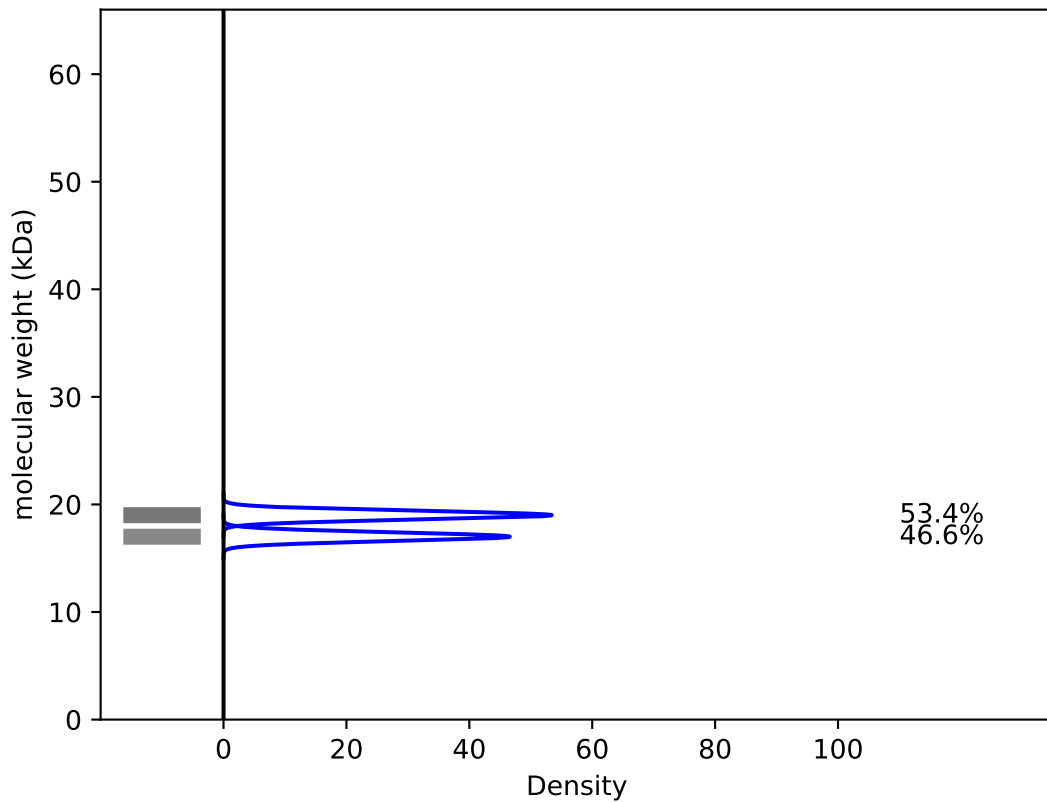

# Q13242

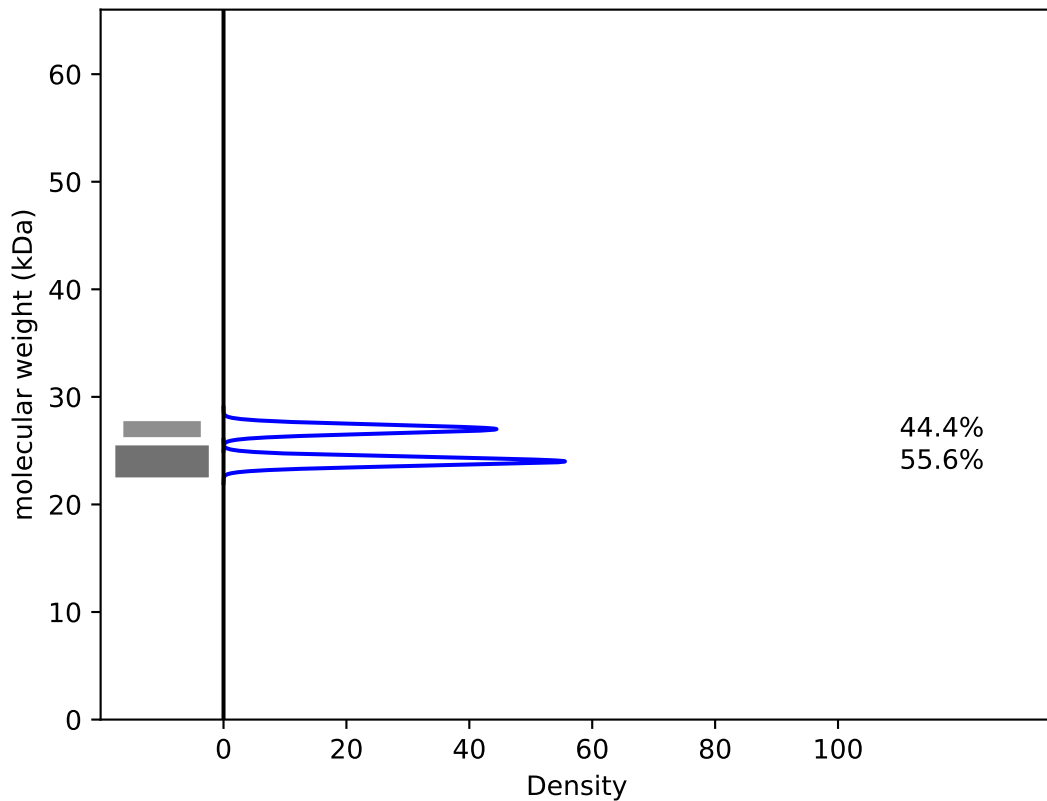

# Q13247

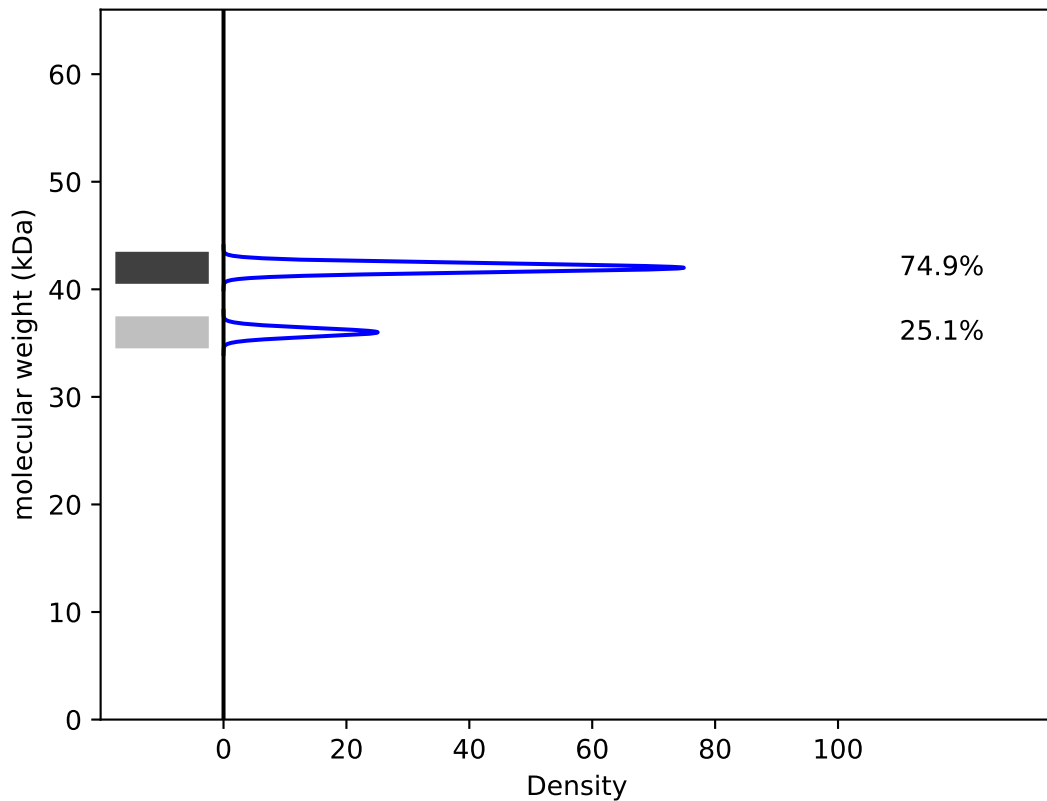

# Q13243

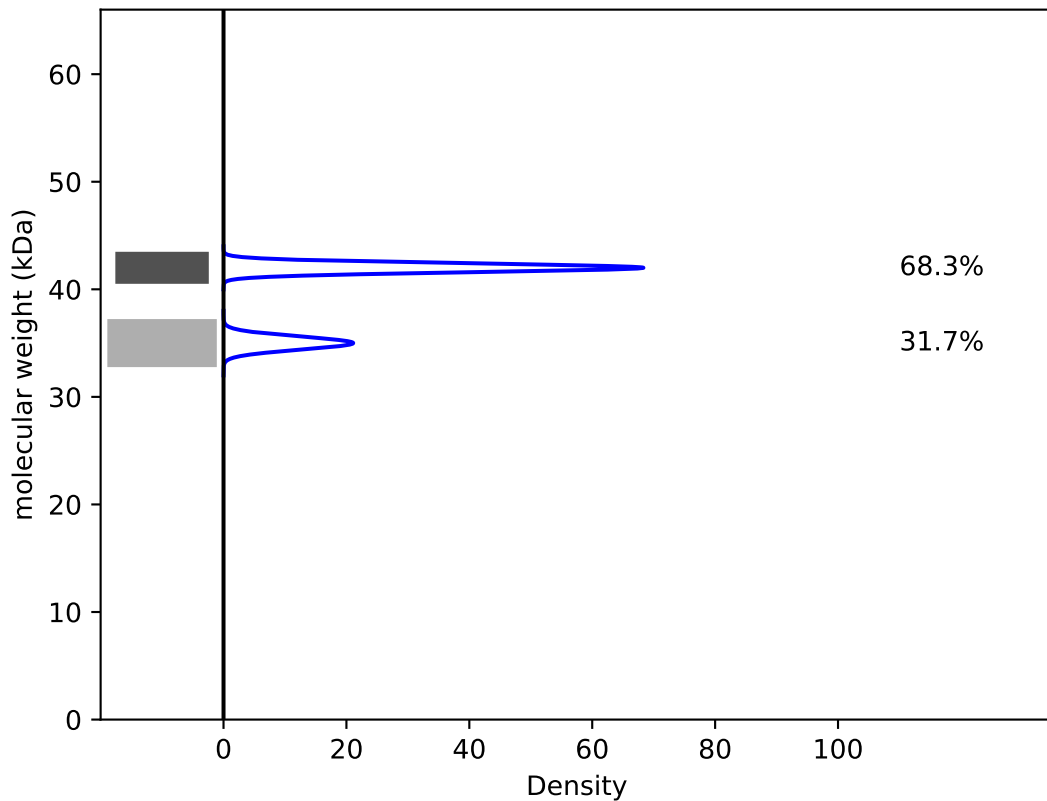

Q13257



# Q13283

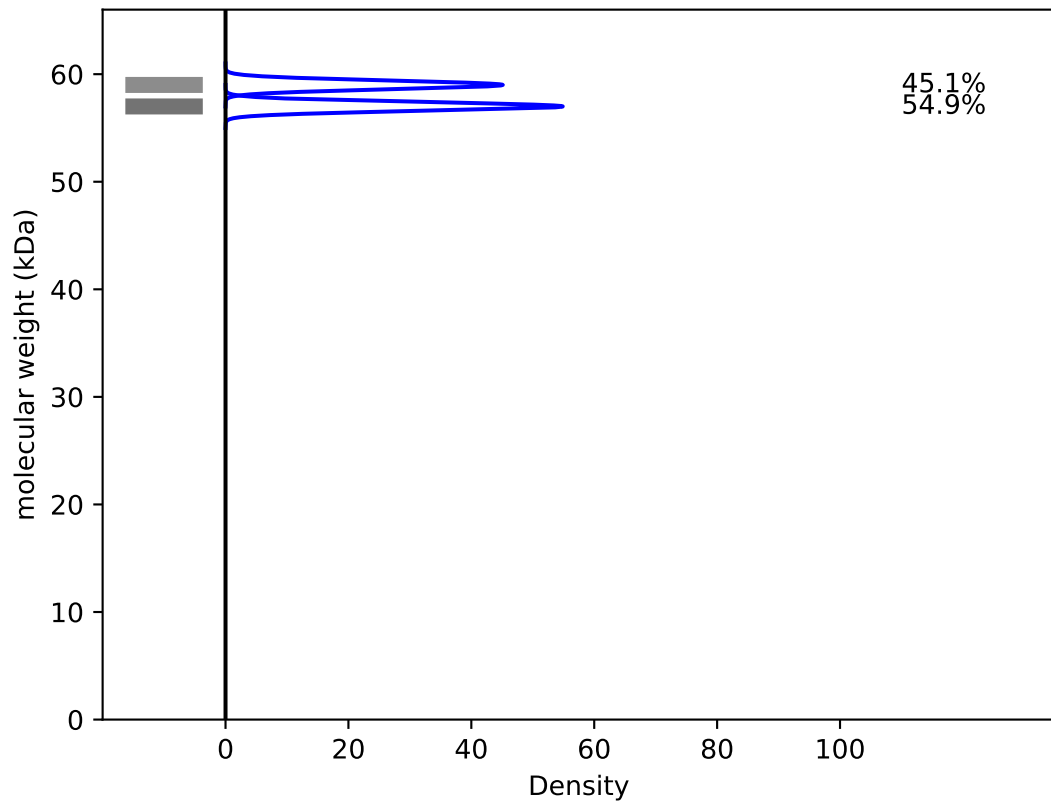

Q13347



# Q13363

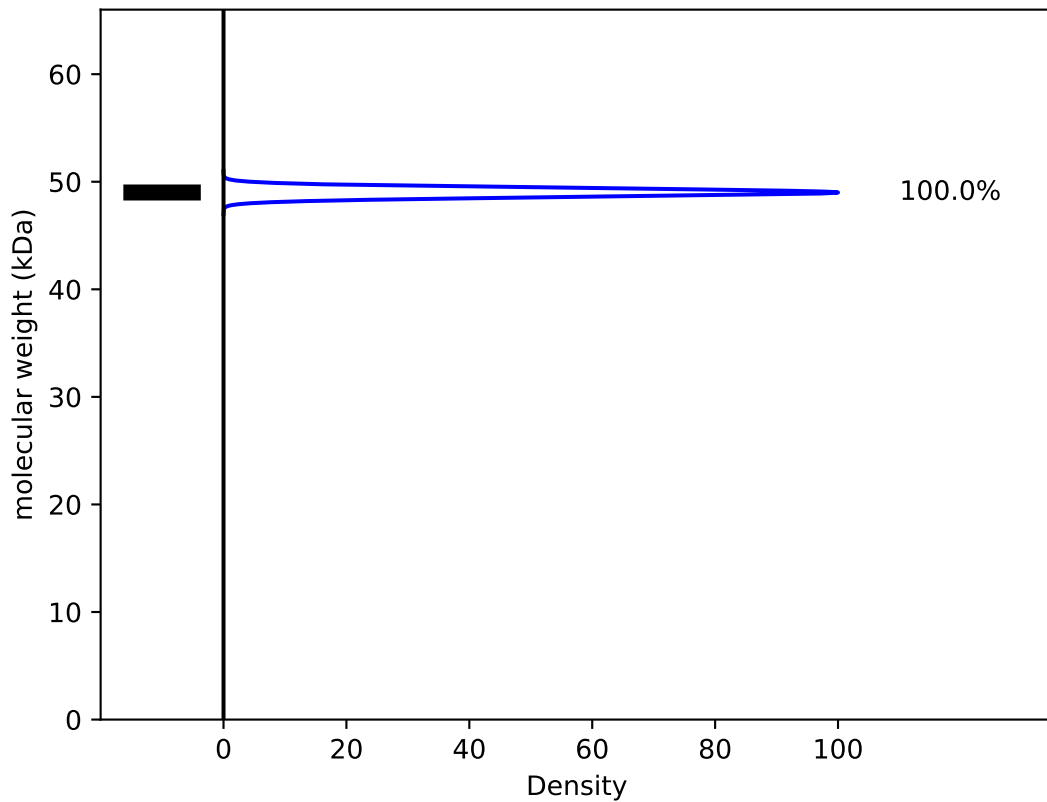



# Q13418

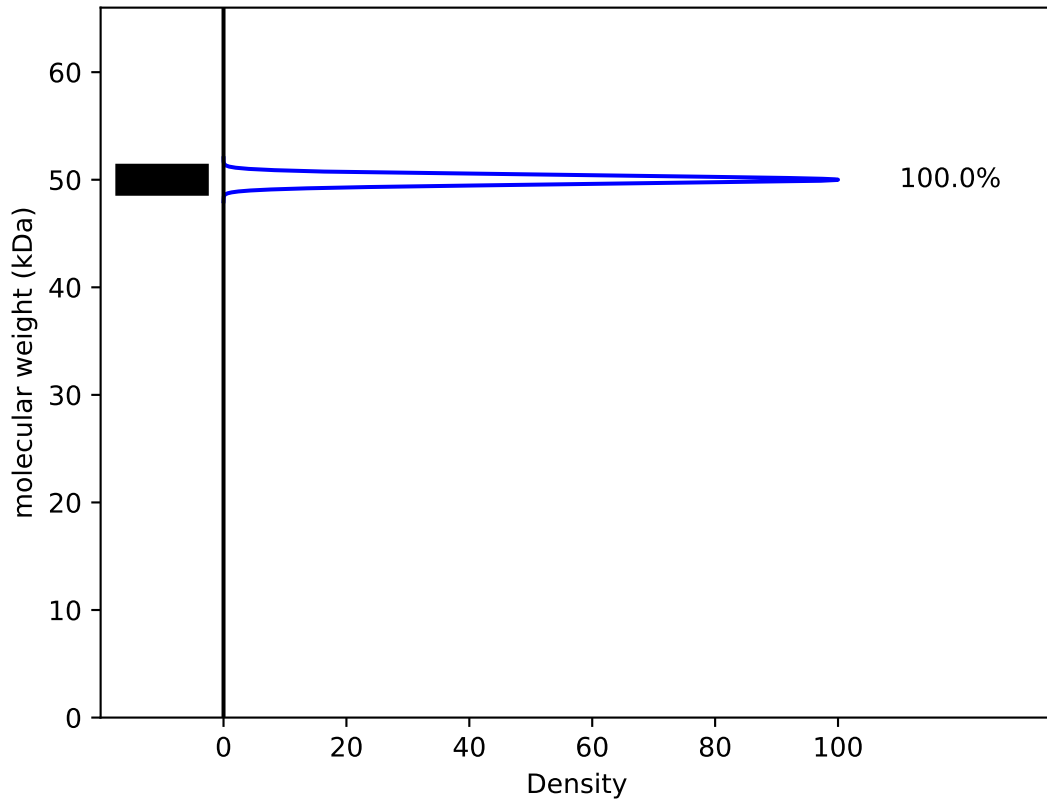

# Q13442



# Q13445



# Q13547



# Q13561



# Q13564



# Q13595

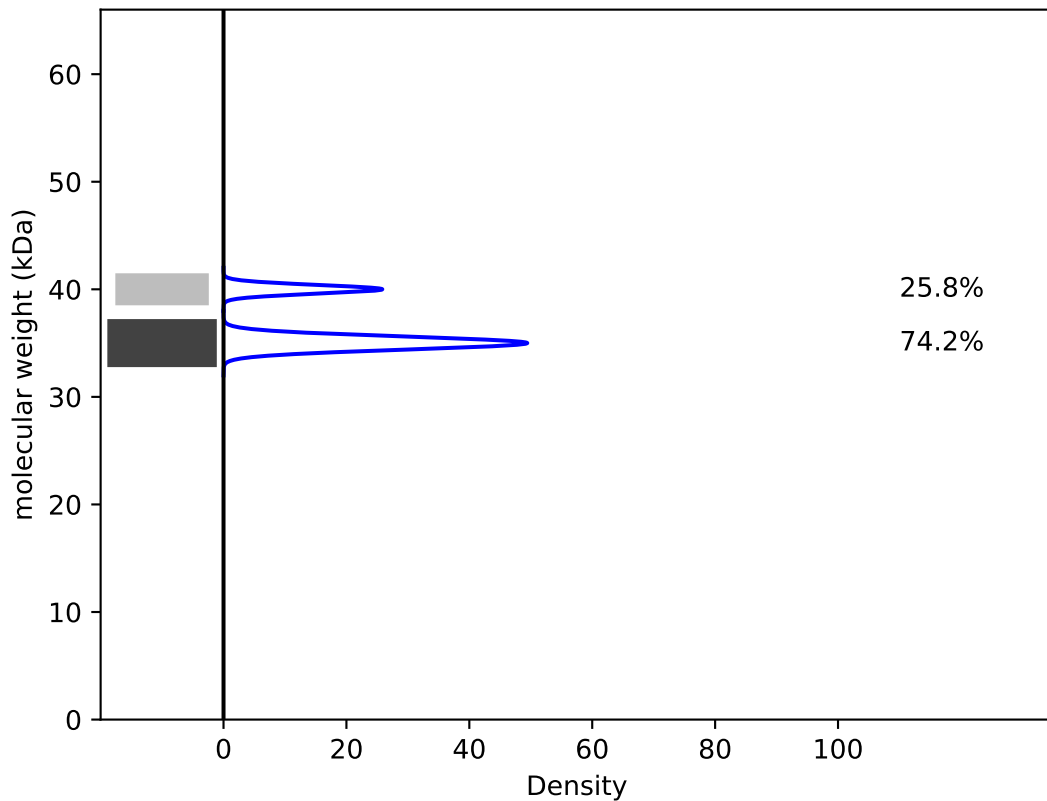

# Q13630

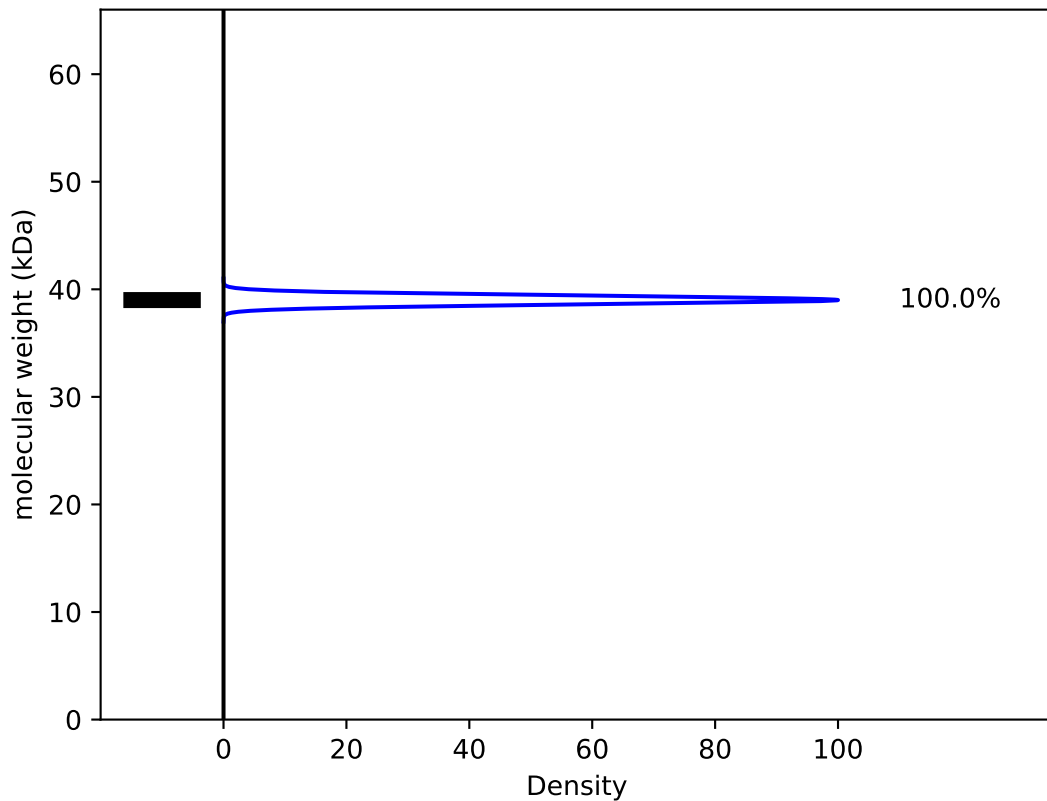



Q13636

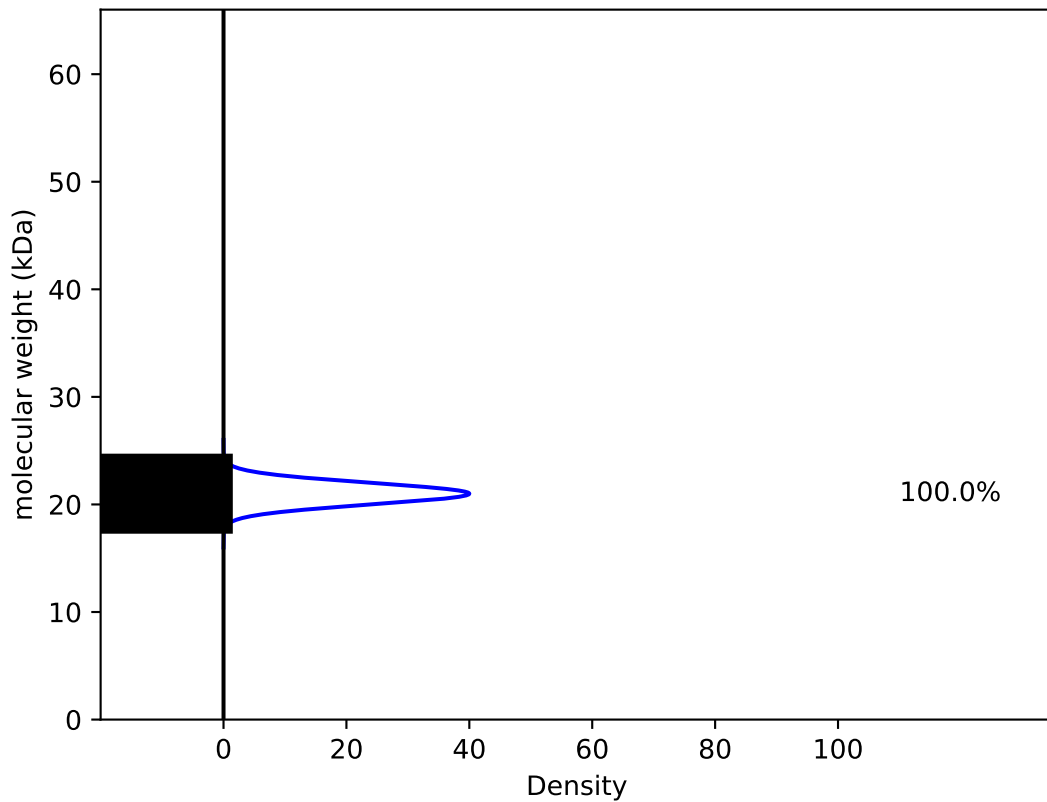

# Q9UL26



Q13637



Q13838



# Q13868

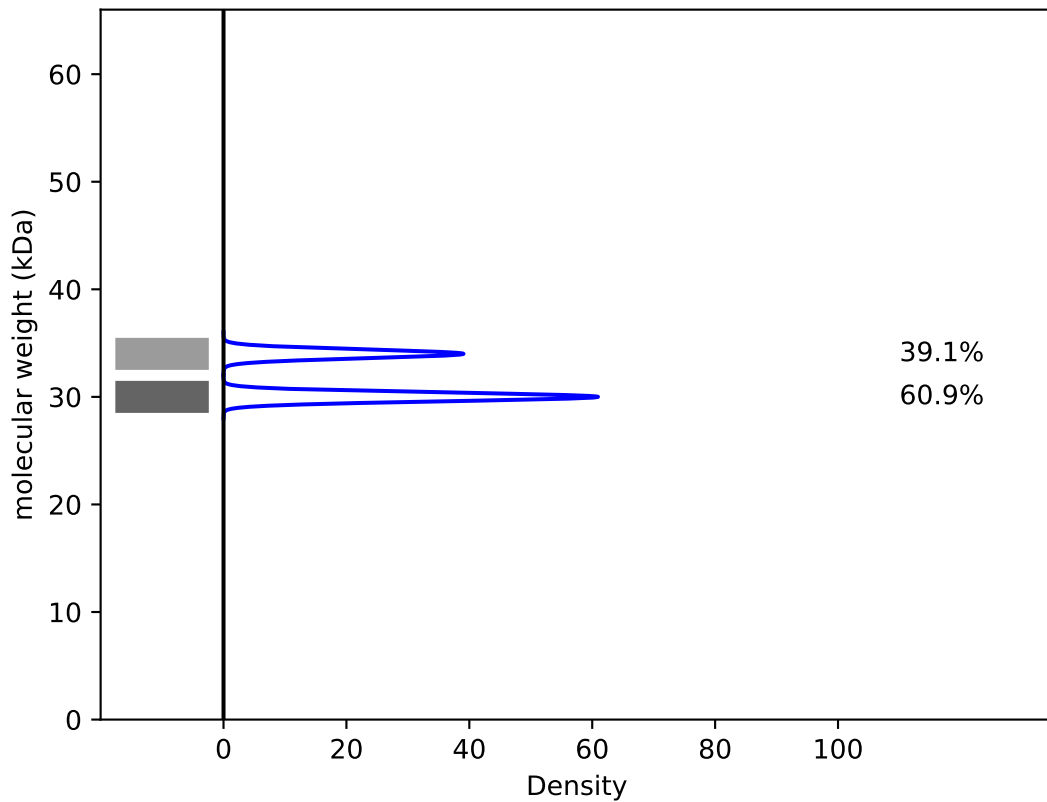

# Q13885

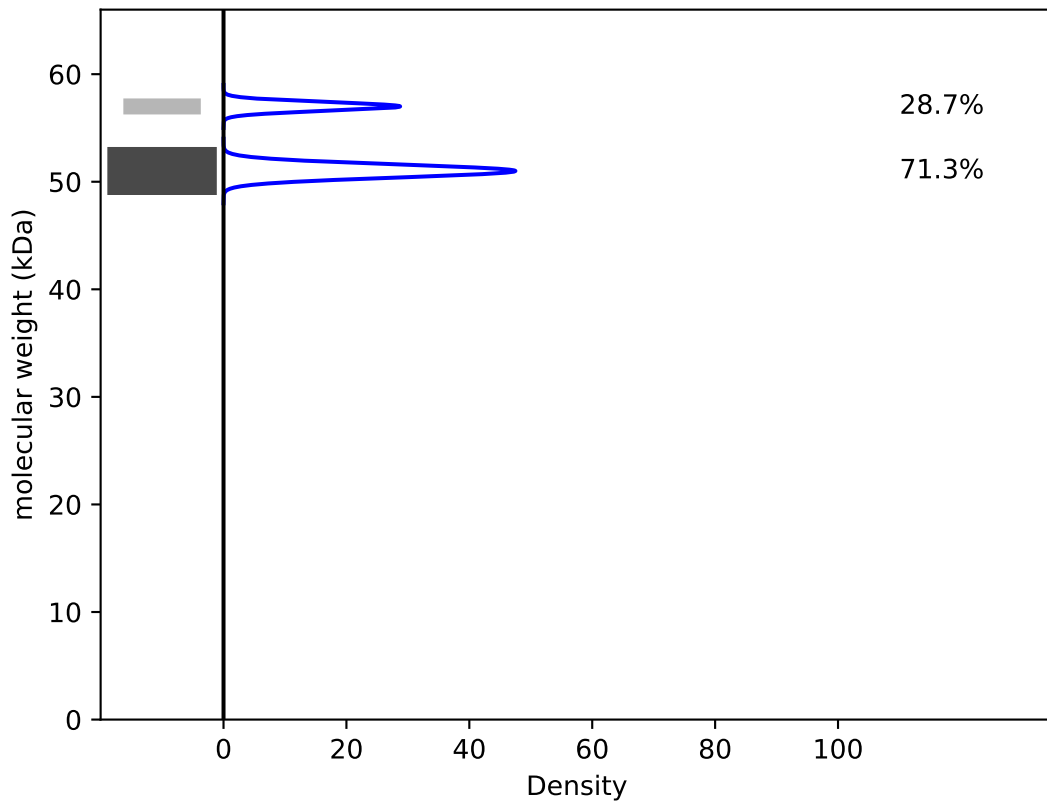

# Q13895



# Q13907





# Q9BXS1

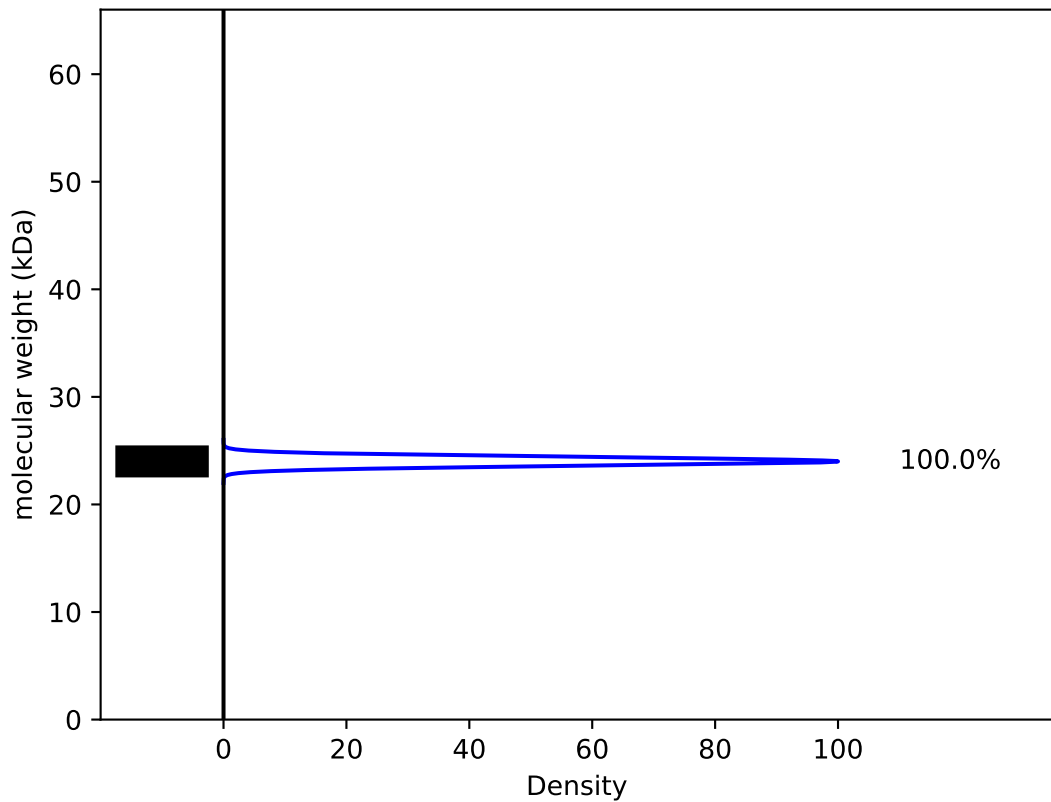

# Q13951



# Q14103



# Q14116



# Q14165

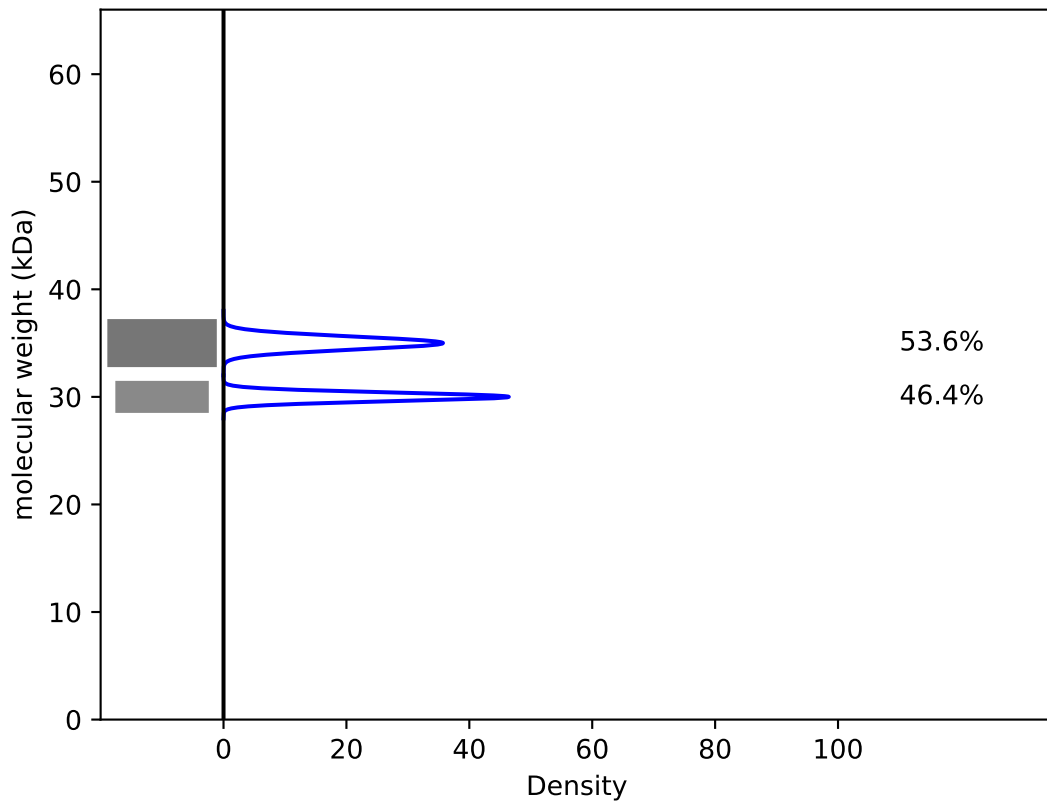

# Q14197

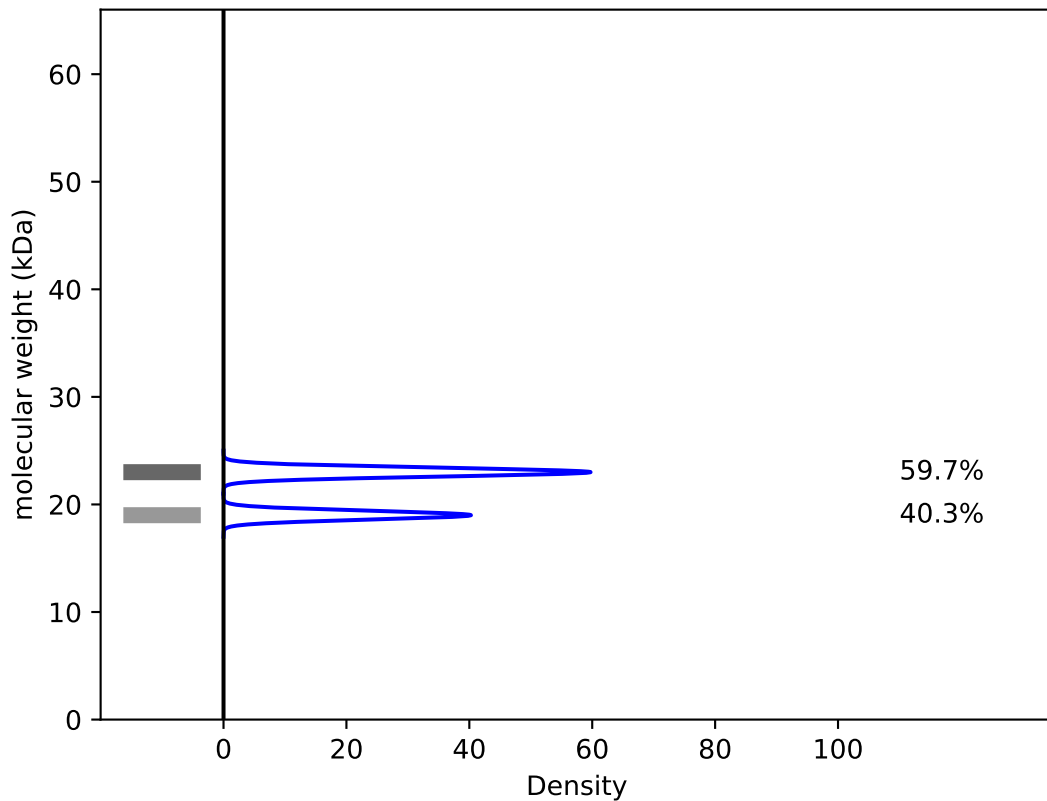

# Q14232



# Q14320





# Q9Y247



Q14376



# Q14498



# Q14558



Q14847



Q14914



# Q14964

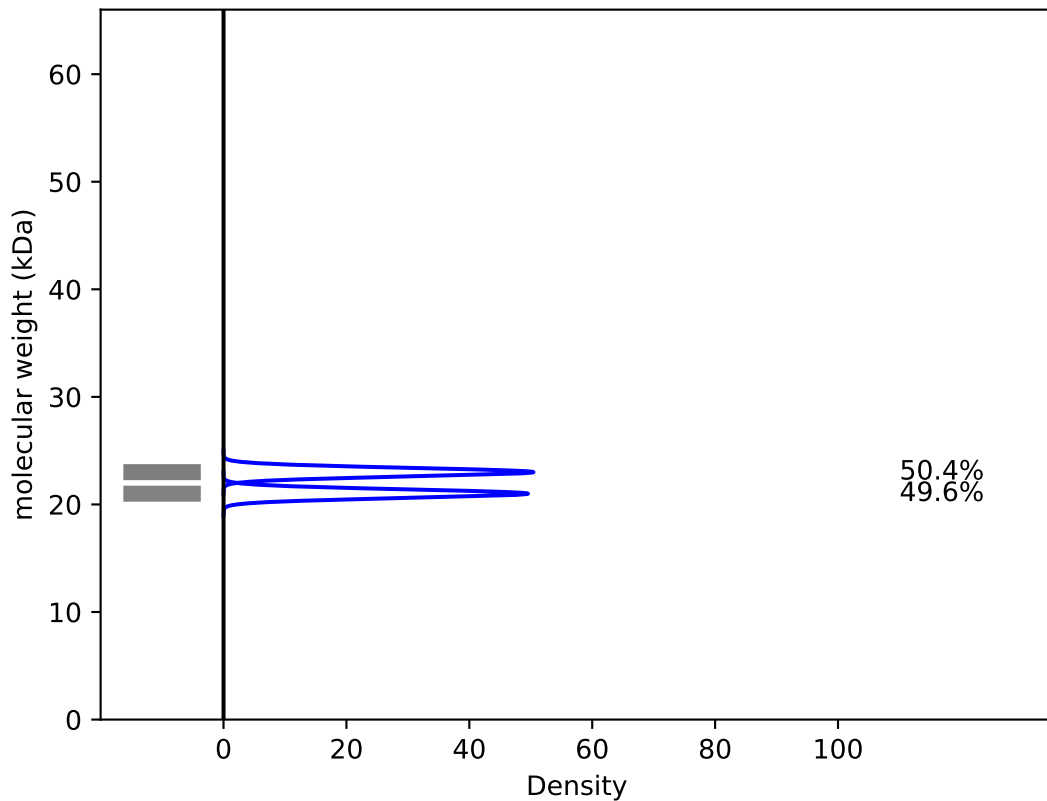

# Q15005





# Q15008

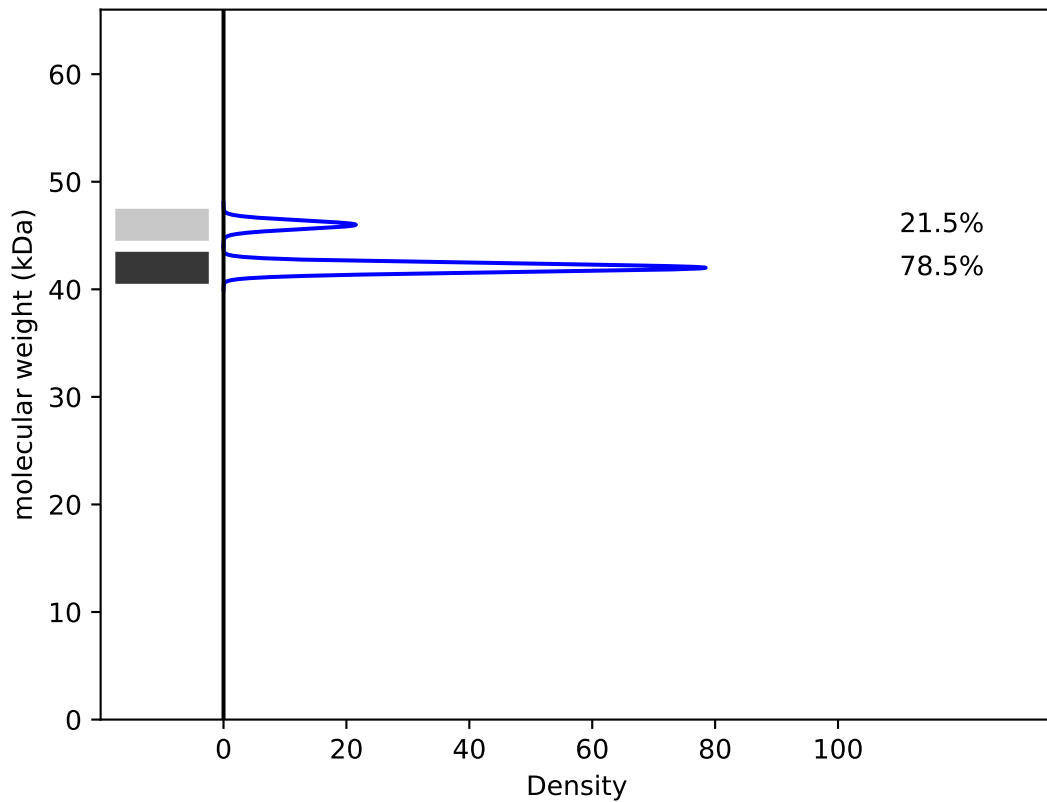

# Q15019

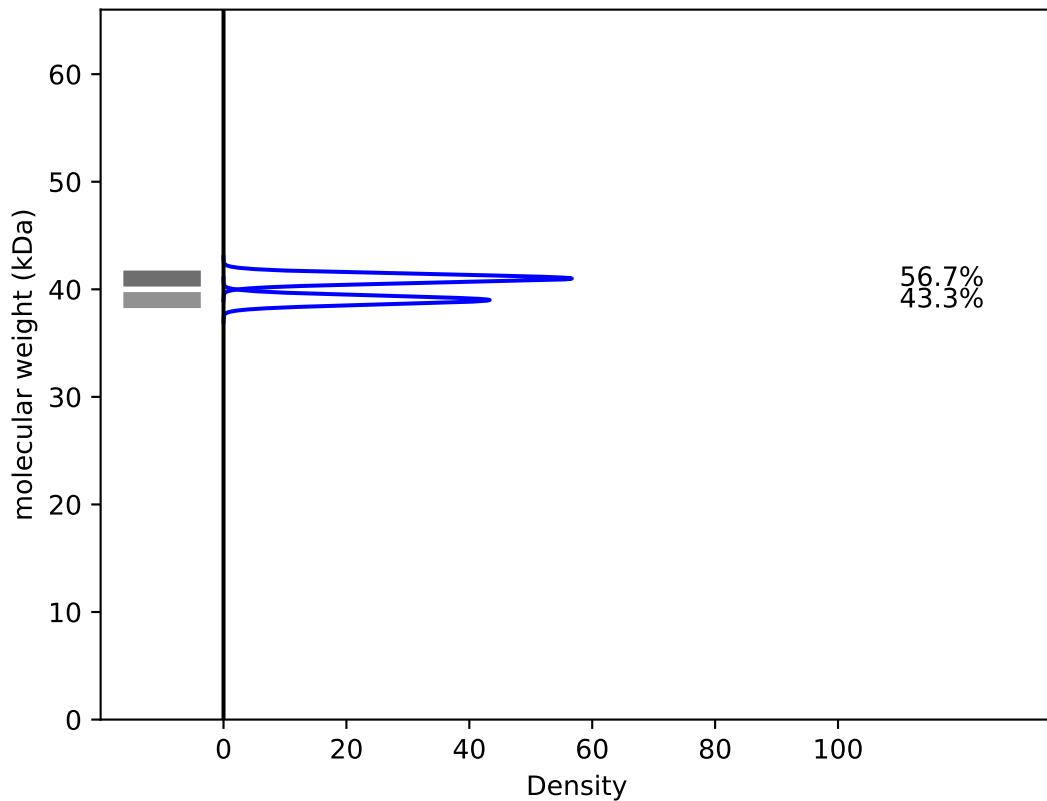

# Q15024



# Q15056

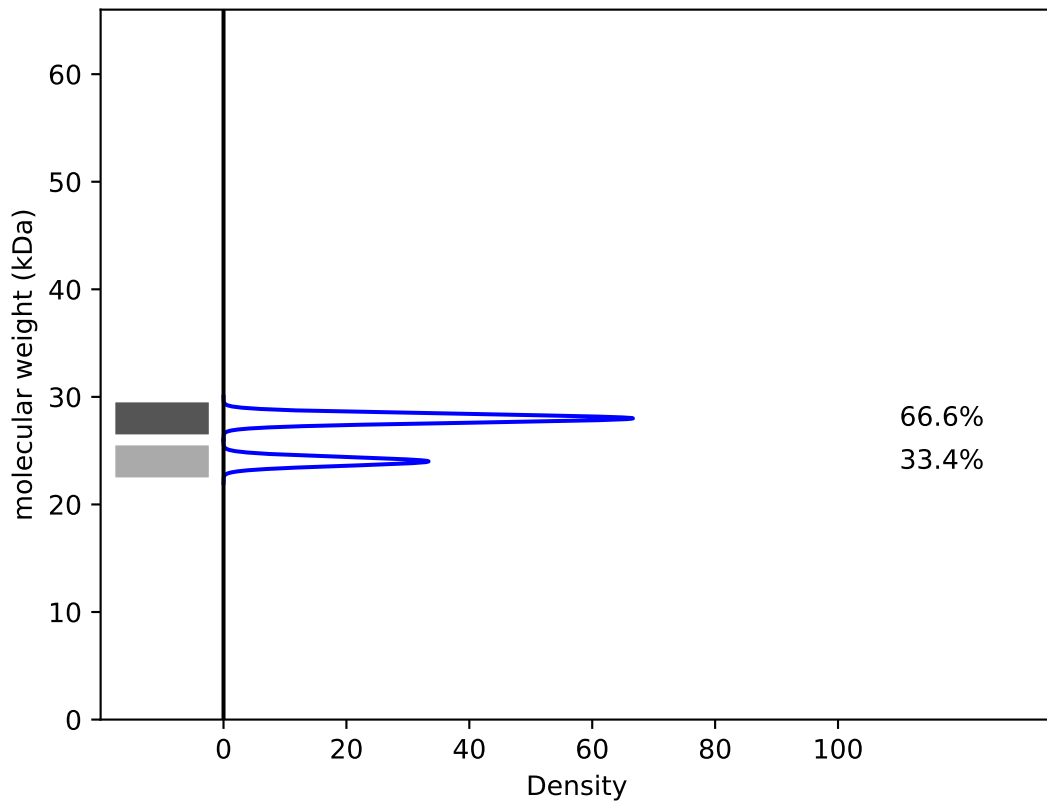

# Q15084



# Q15102

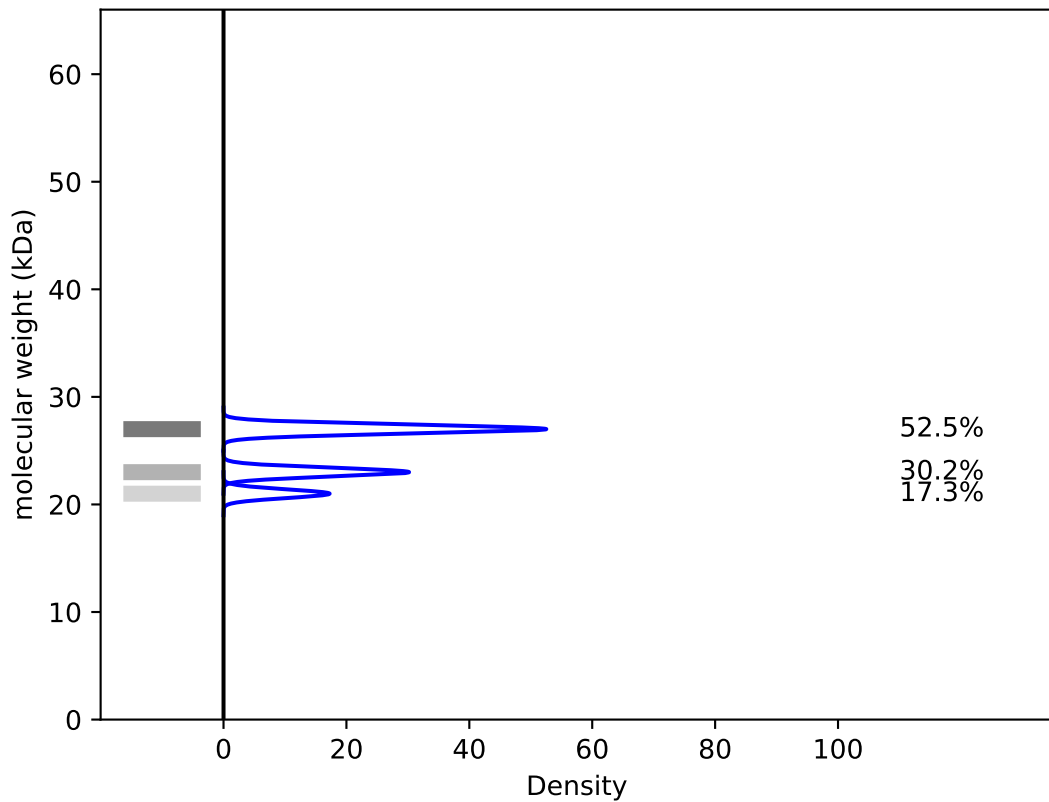

# Q15125

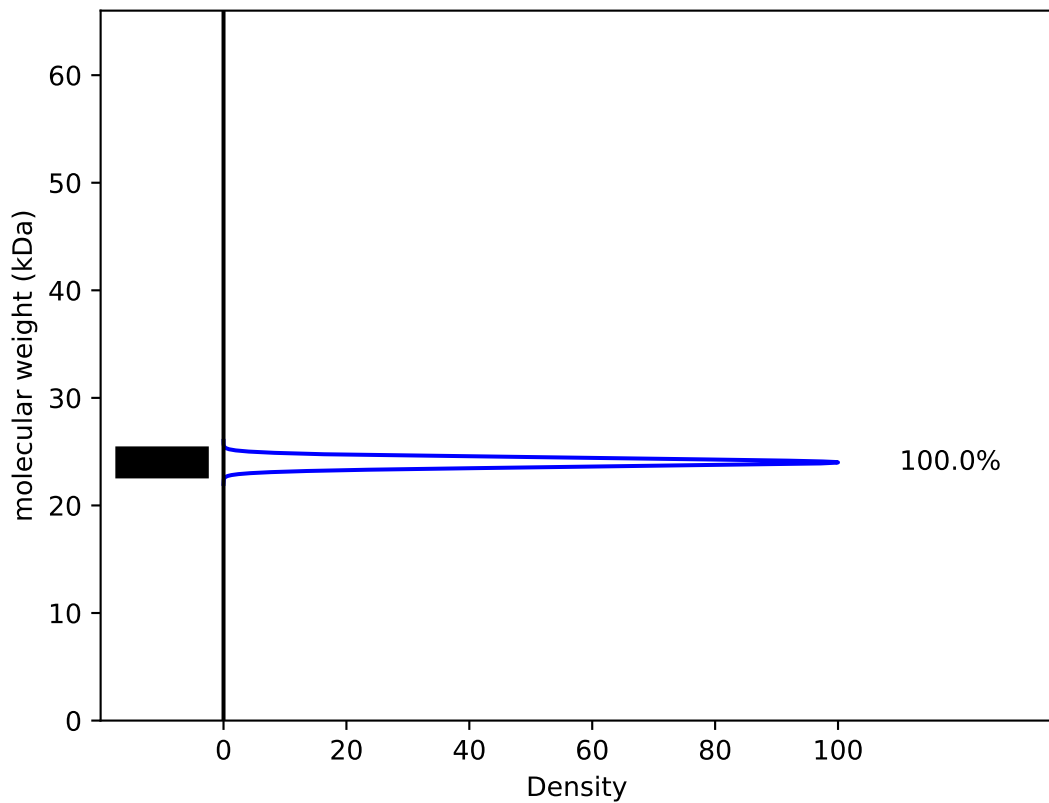

# Q15126





# Q15165

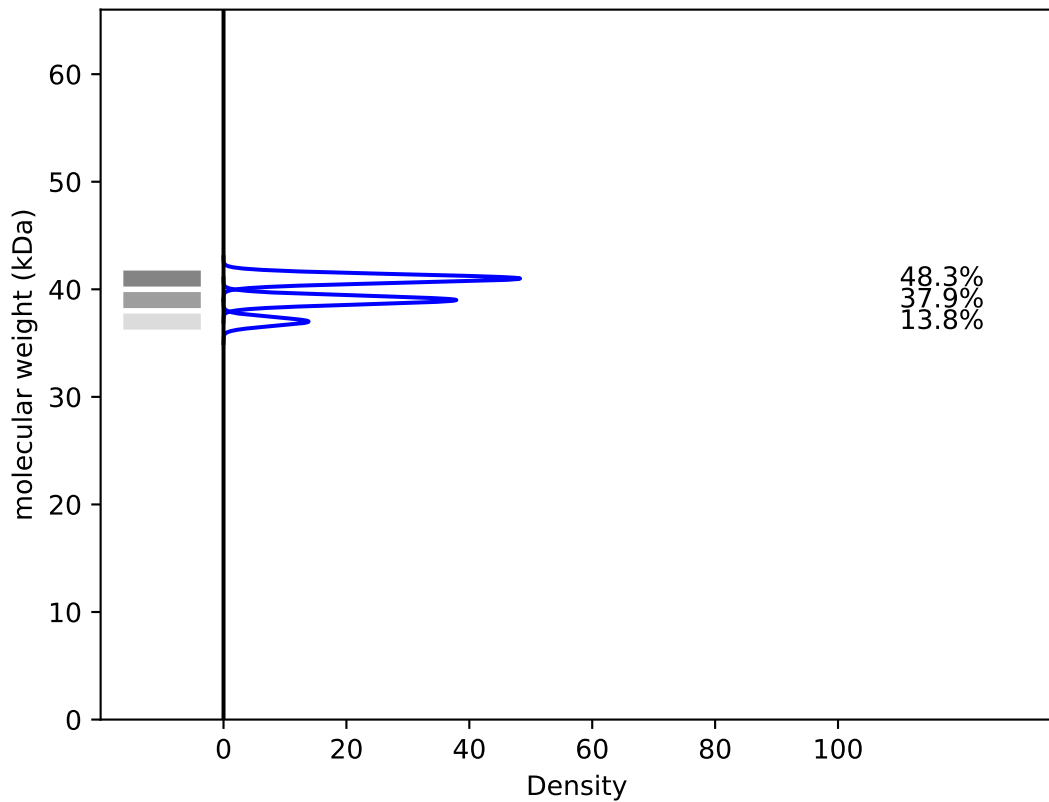

# Q15181

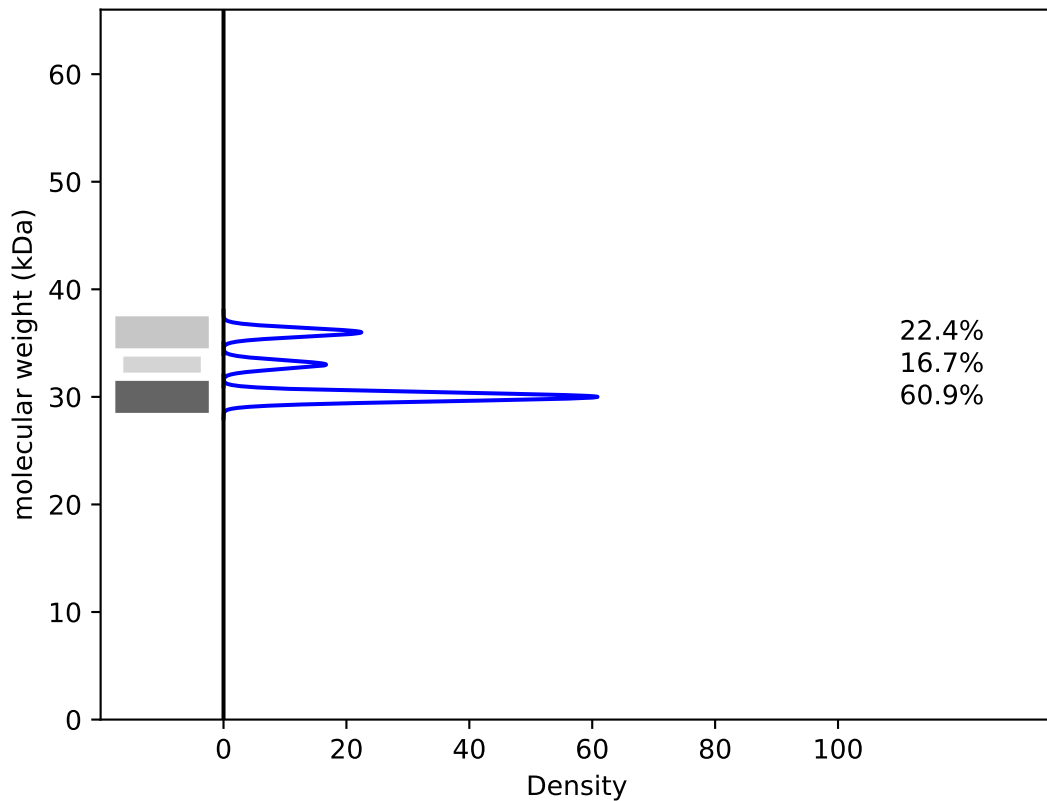

# Q15185

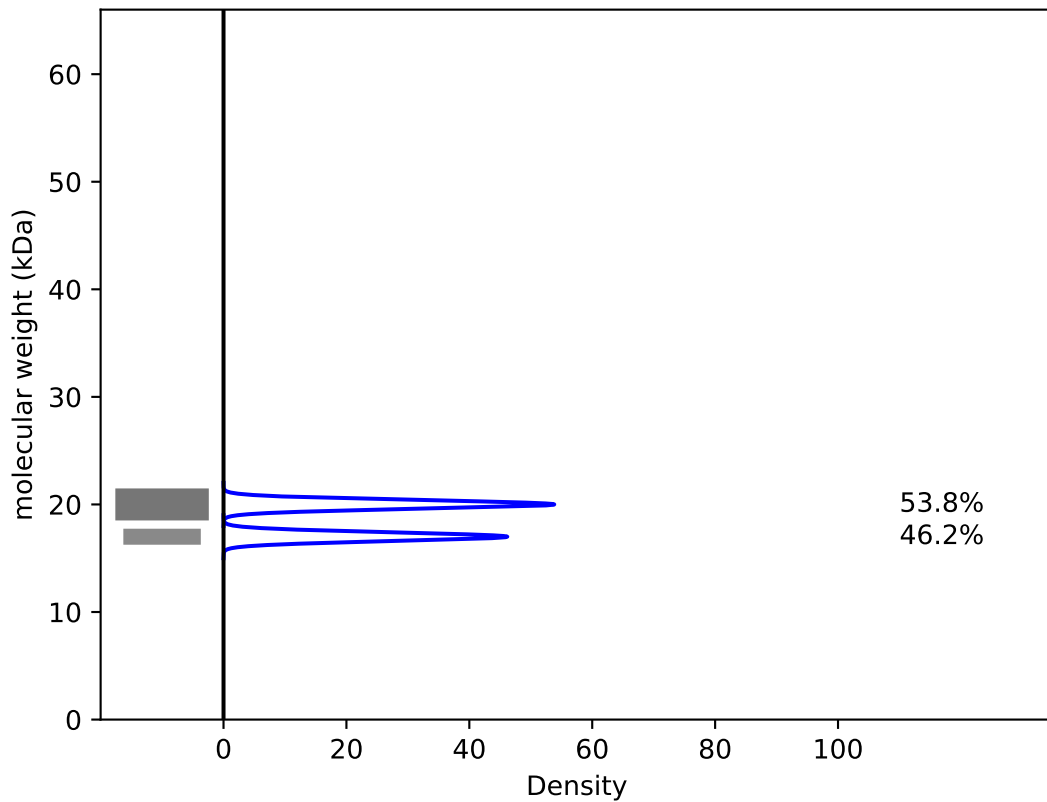

# Q15233

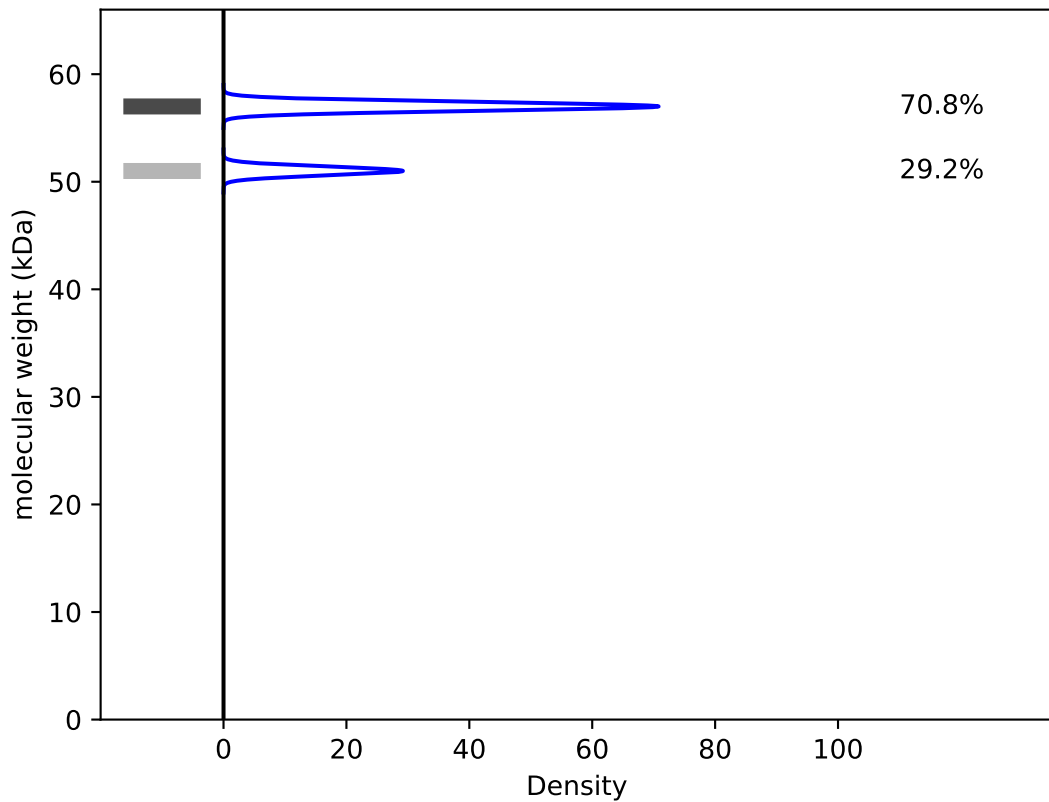

# Q15257

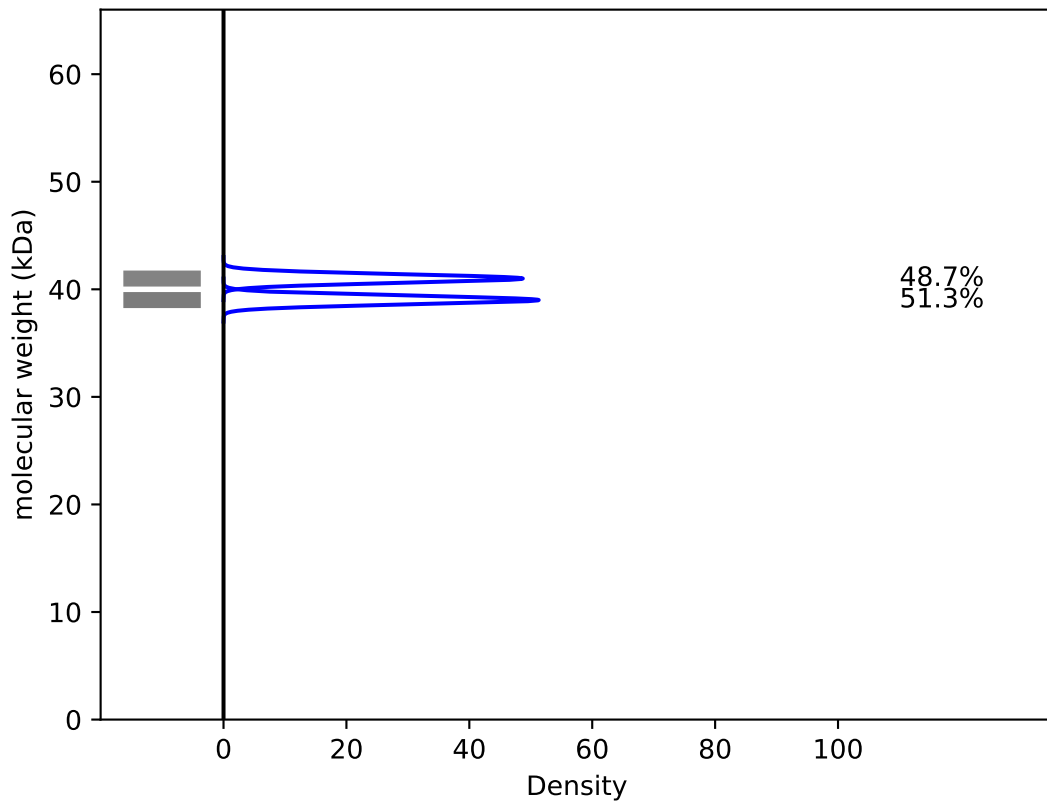

# Q15286

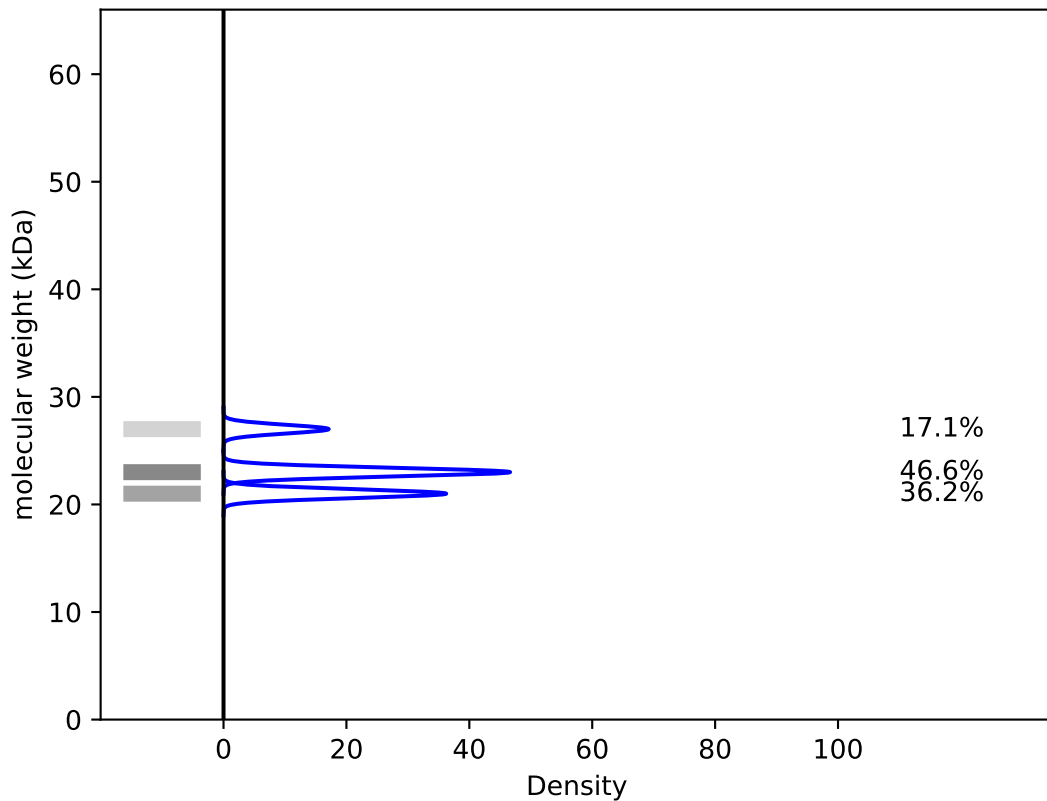

# Q15293



# Q15363





# Q15365

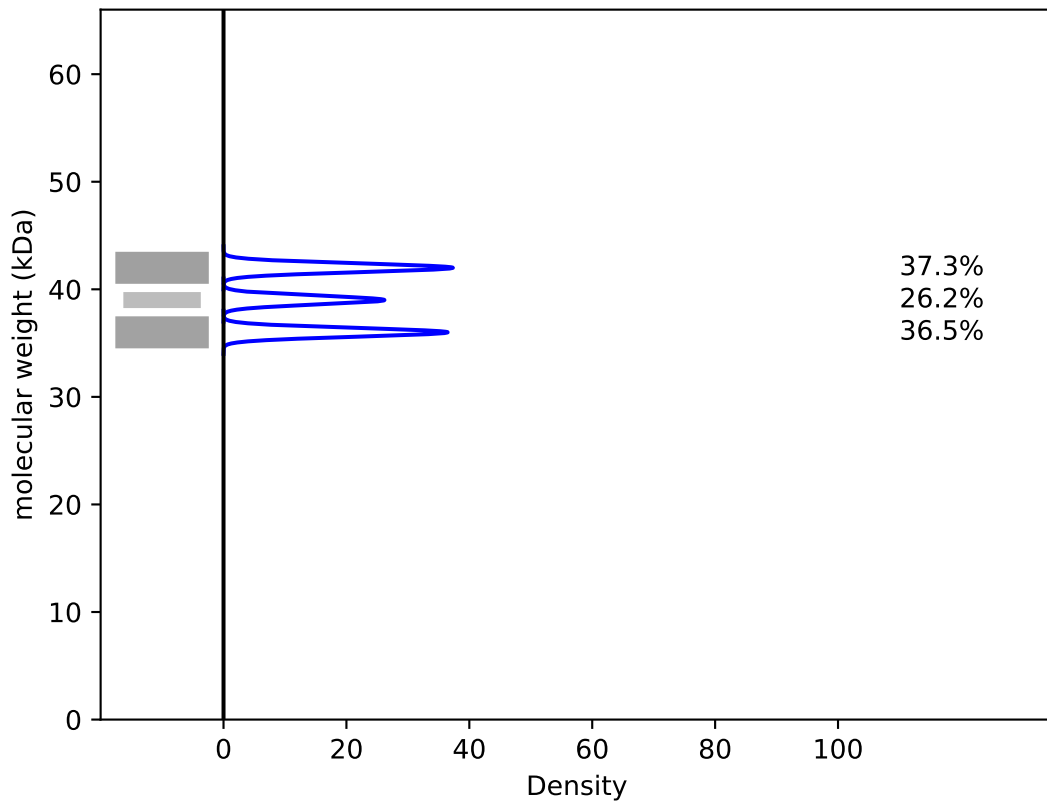

# Q15366

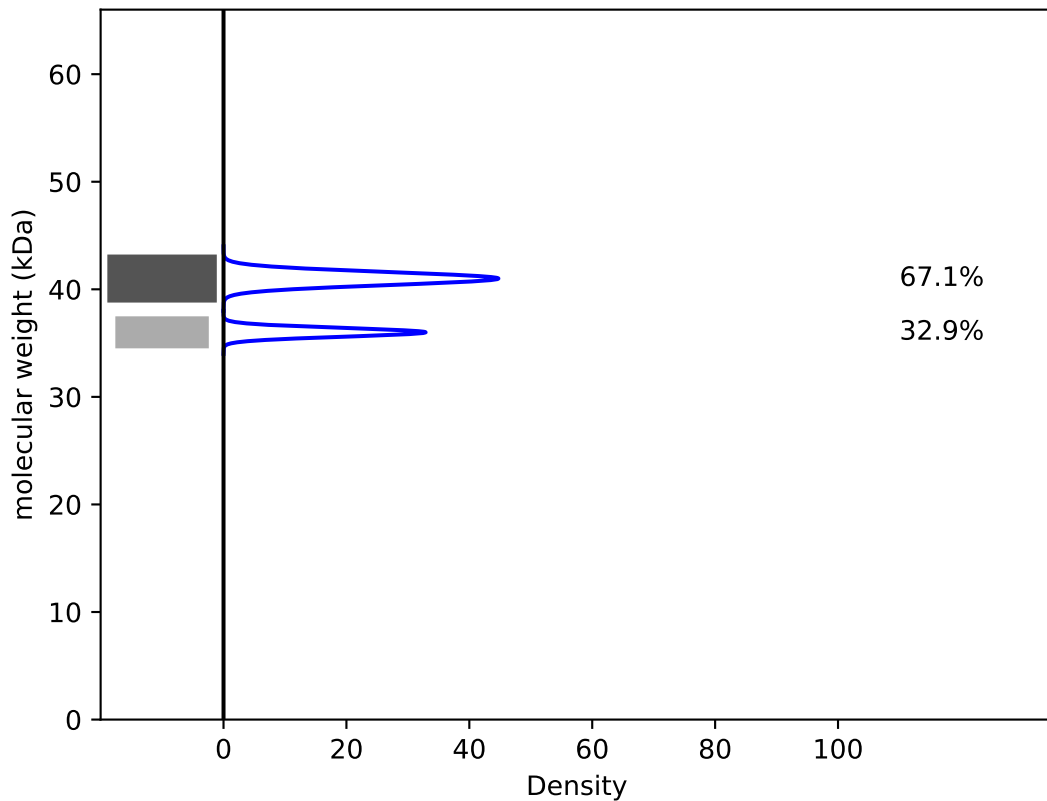

# Q15404



# Q15427



# Q15631



# Q15645

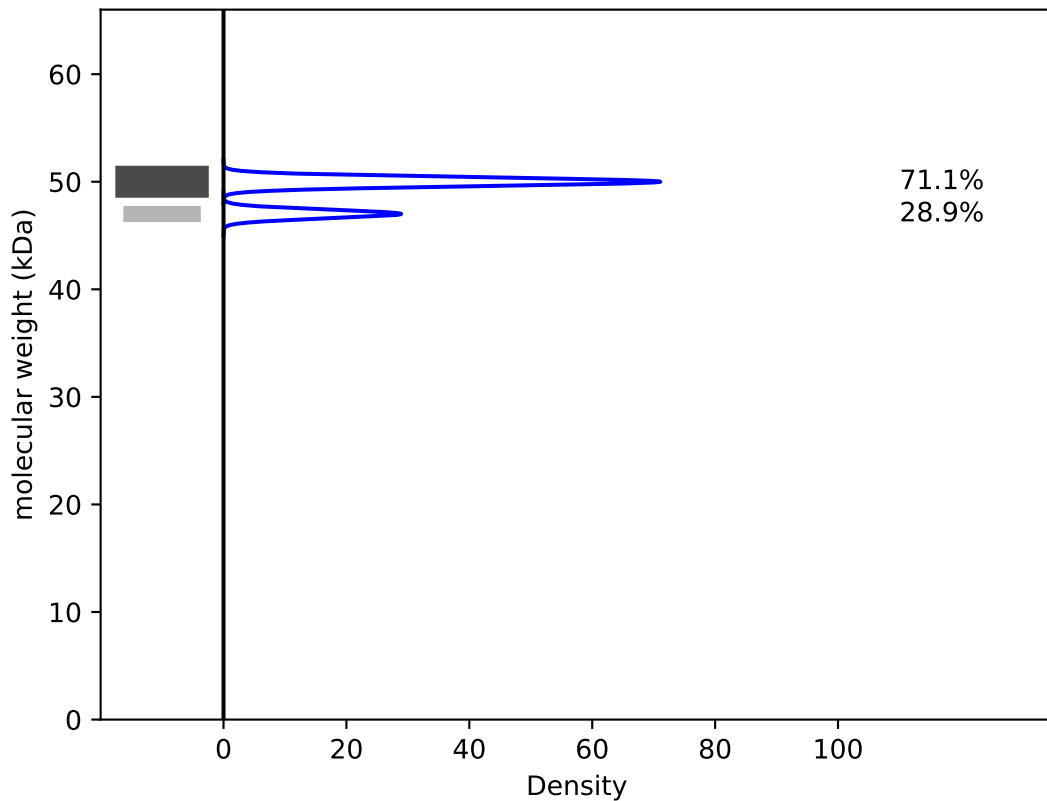

# Q15691



# Q15717





# Q12926



# Q15738



# Q15785

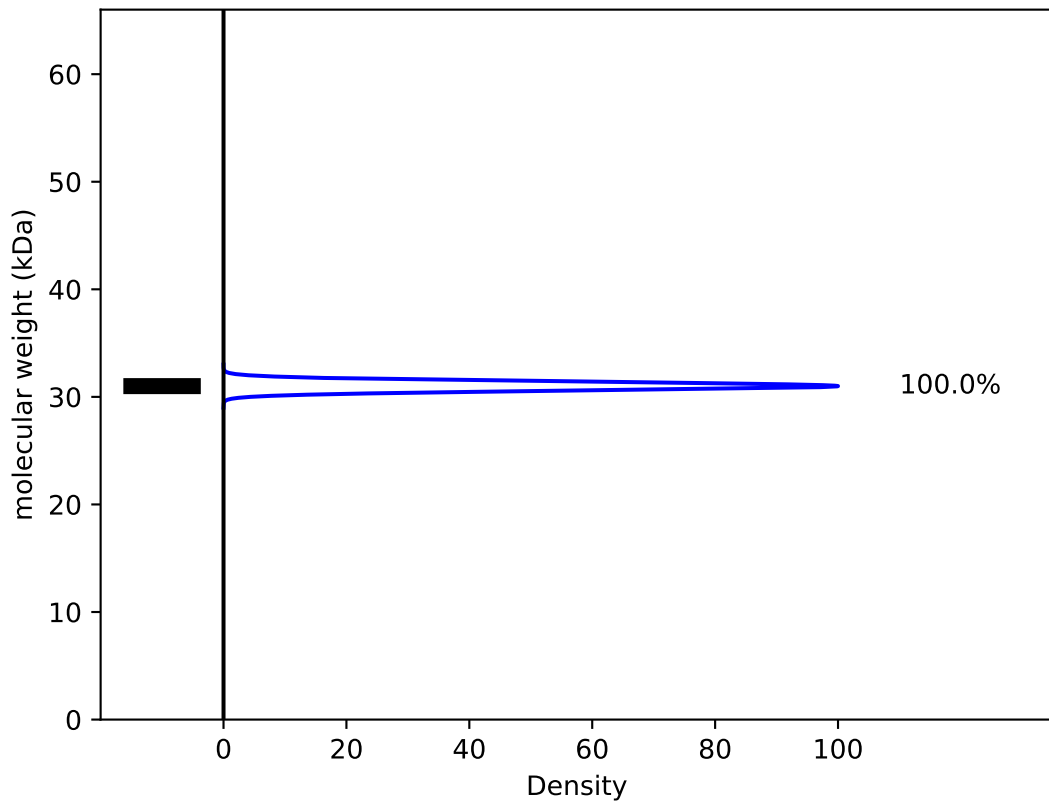

# Q15907



P62491



P57735



# Q16181

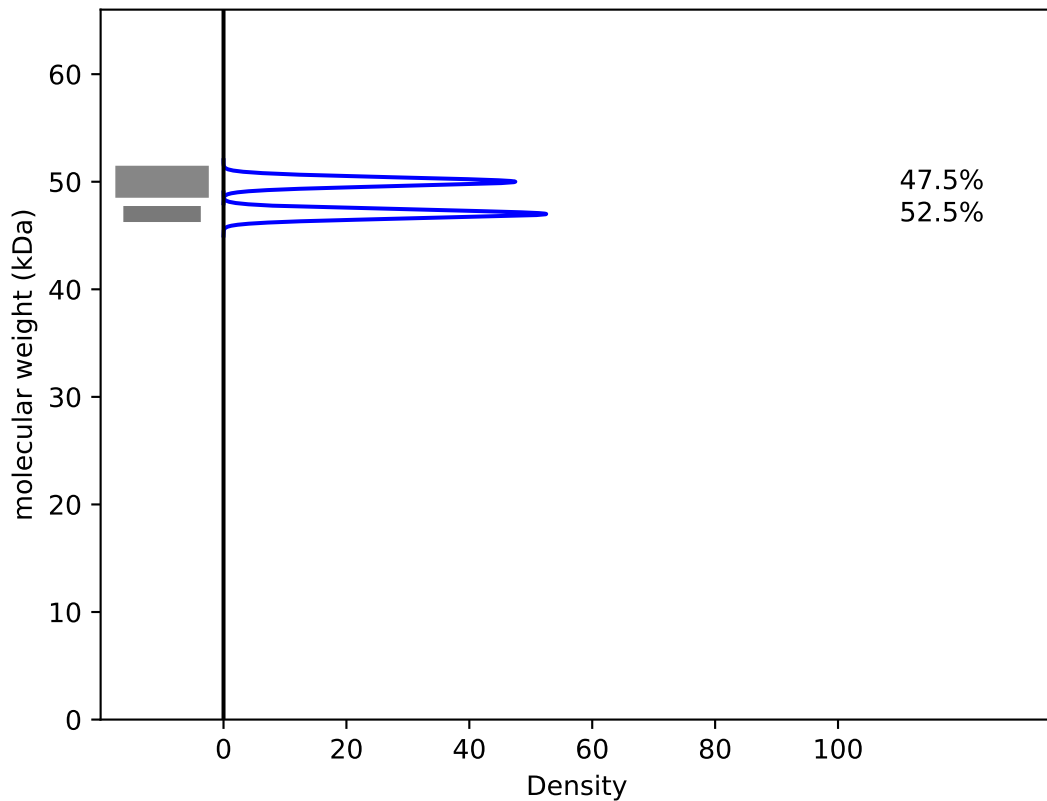

# Q6ZU15

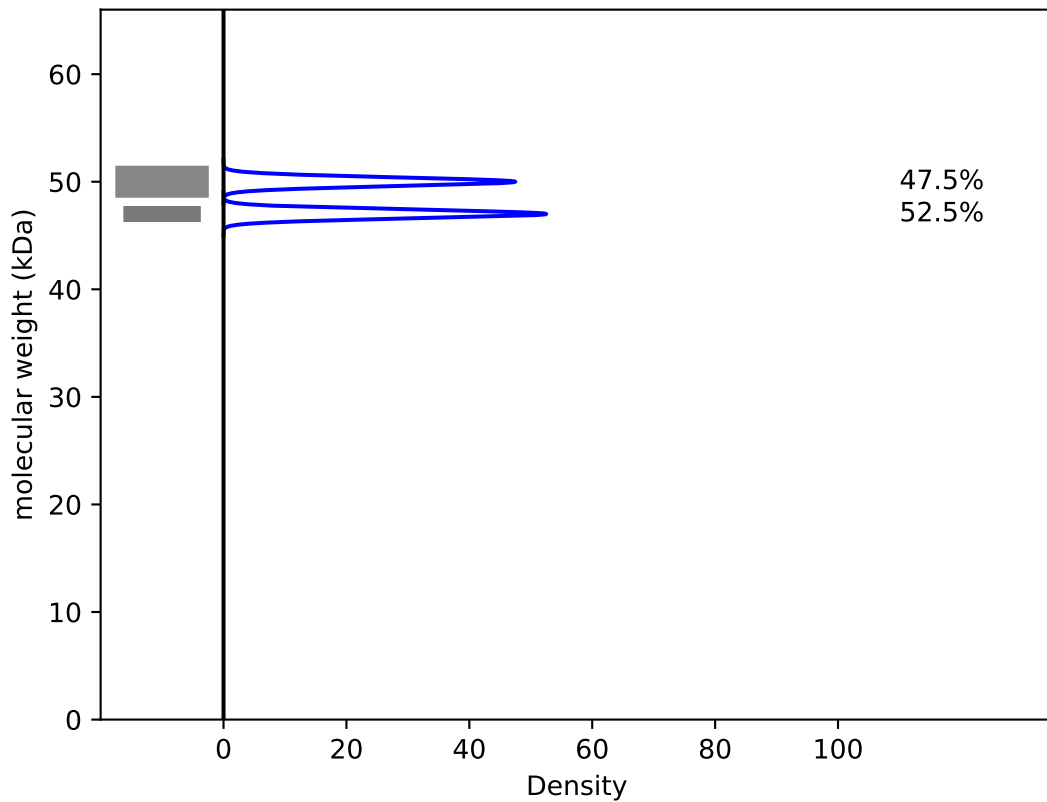



# Q16186



# Q16222



# Q3KQV9



# Q16539



# Q16543

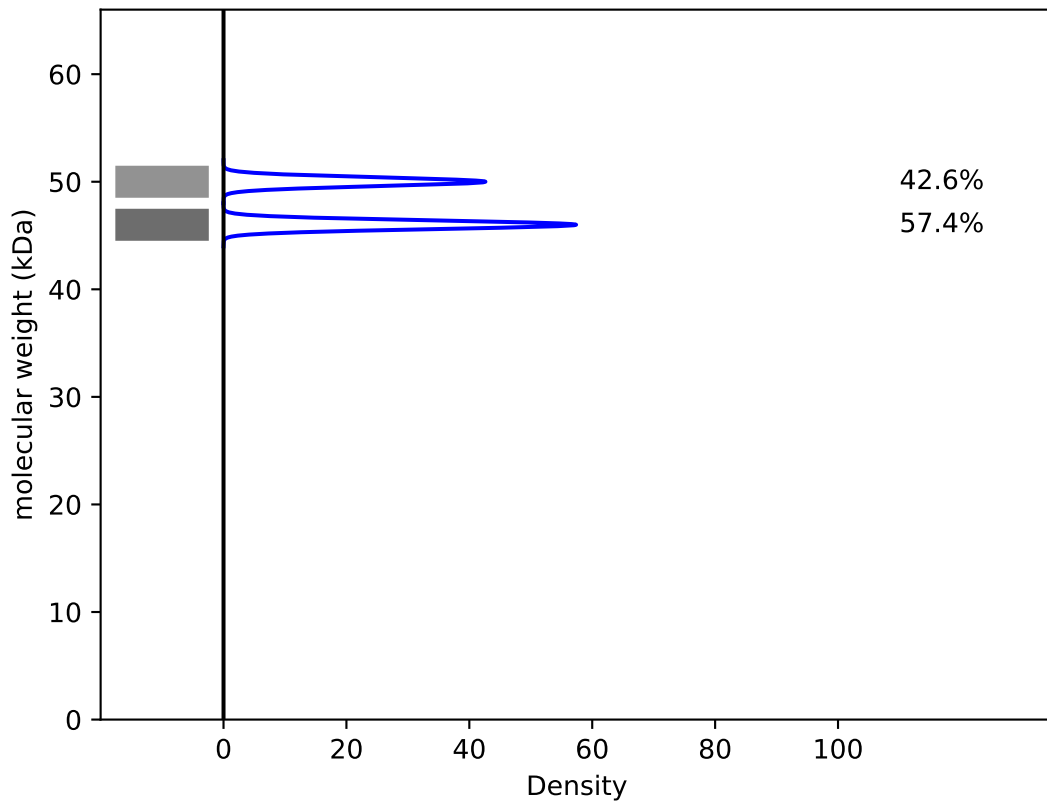

# Q14195



# Q16576

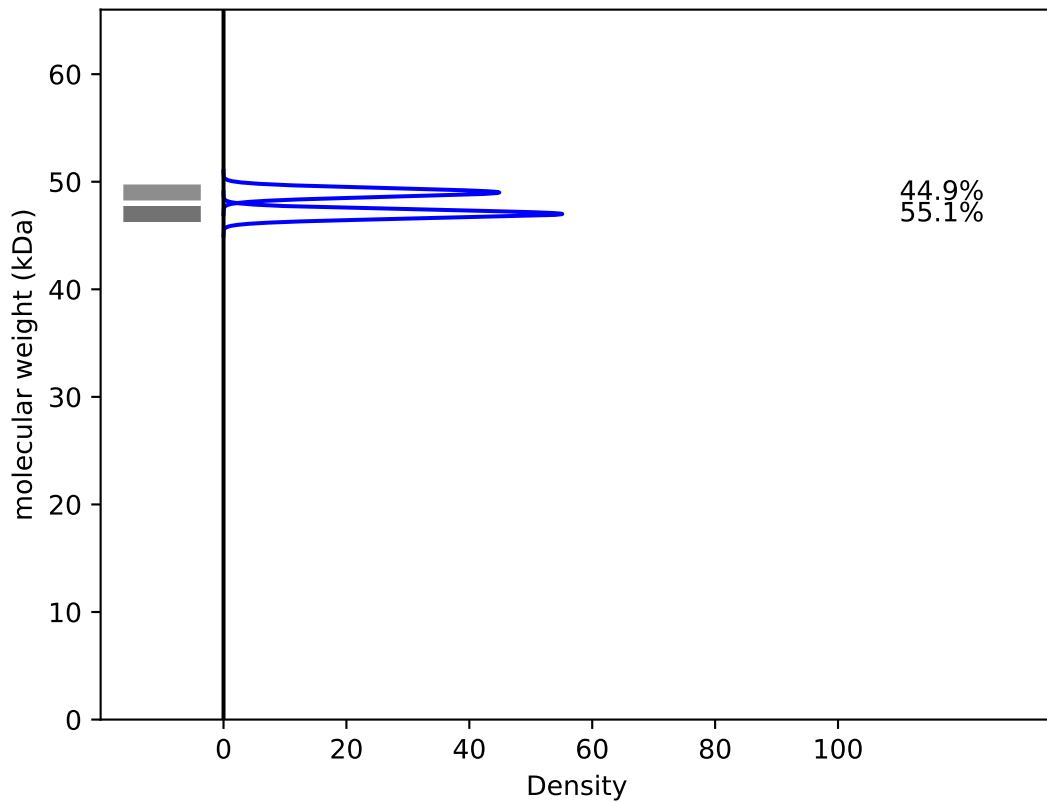

# Q16629





# Q16658



# Q16698



# Q16719



# Q16740

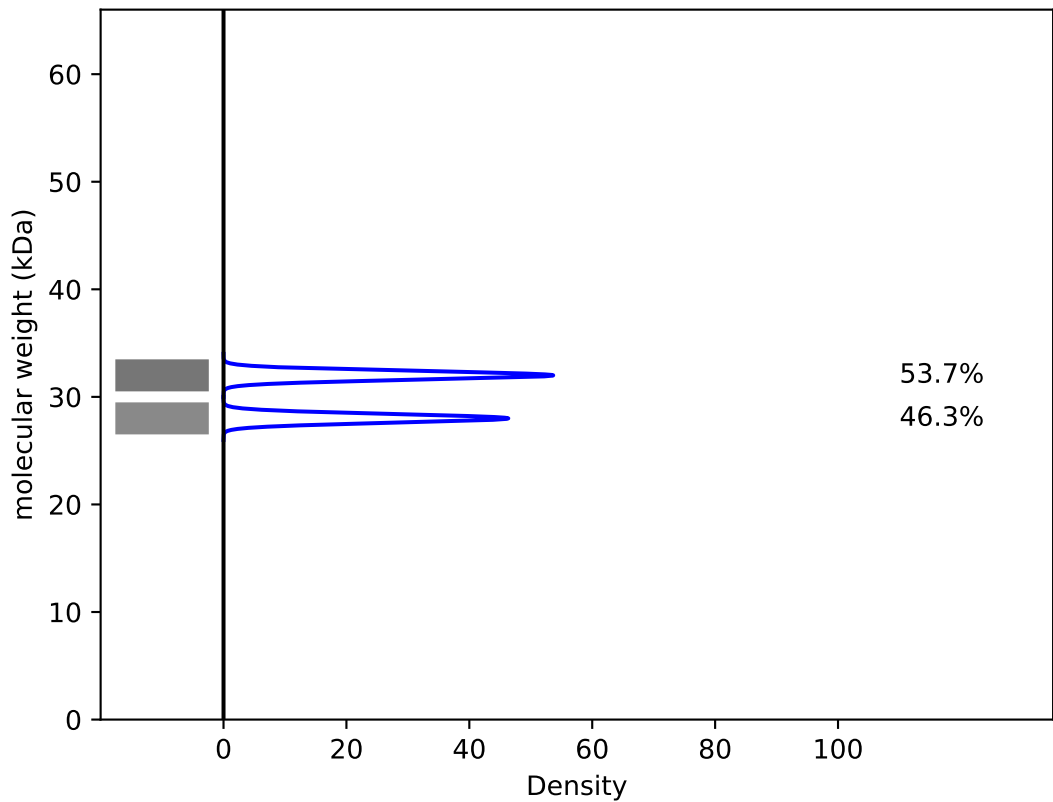

# Q16762



# Q17RY6



# Q3MHD2



# Q3SXM5

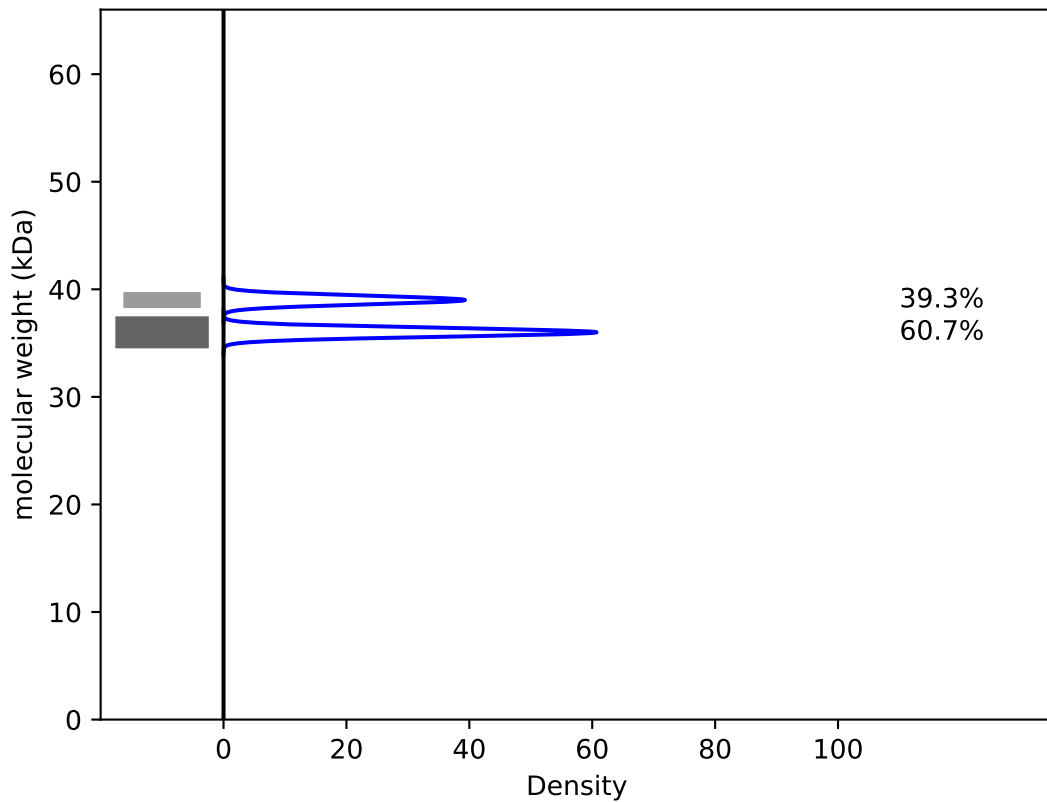



# Q3ZCM7

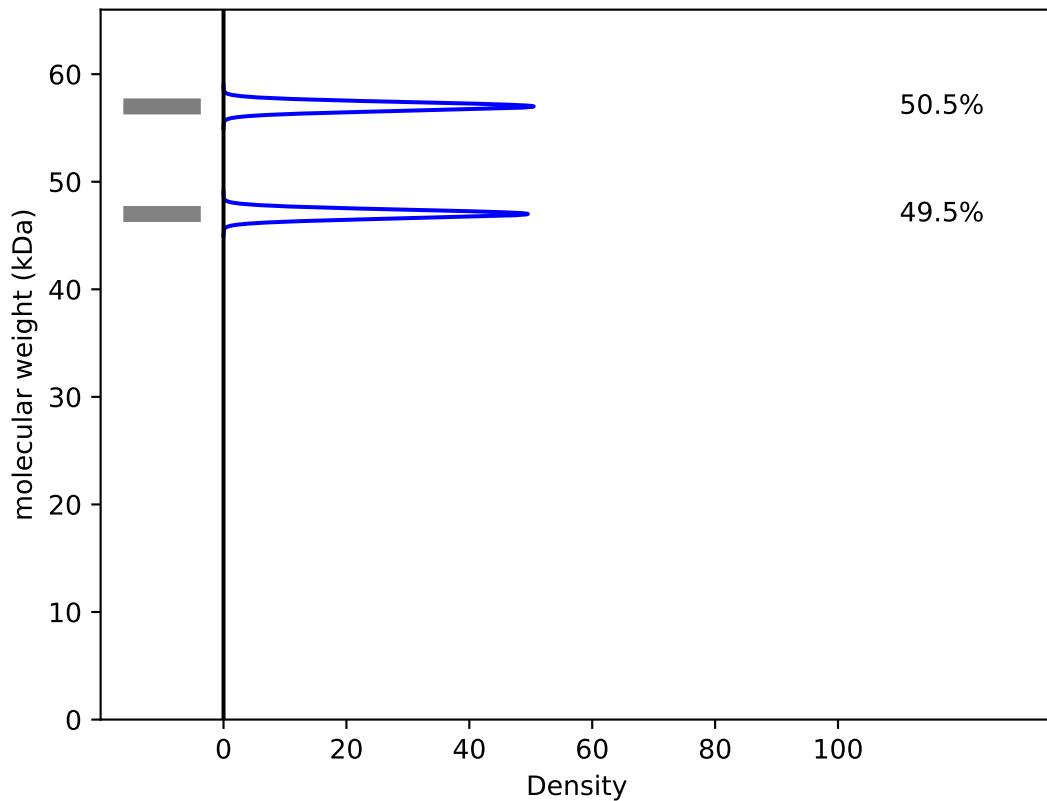

# Q3ZCQ8

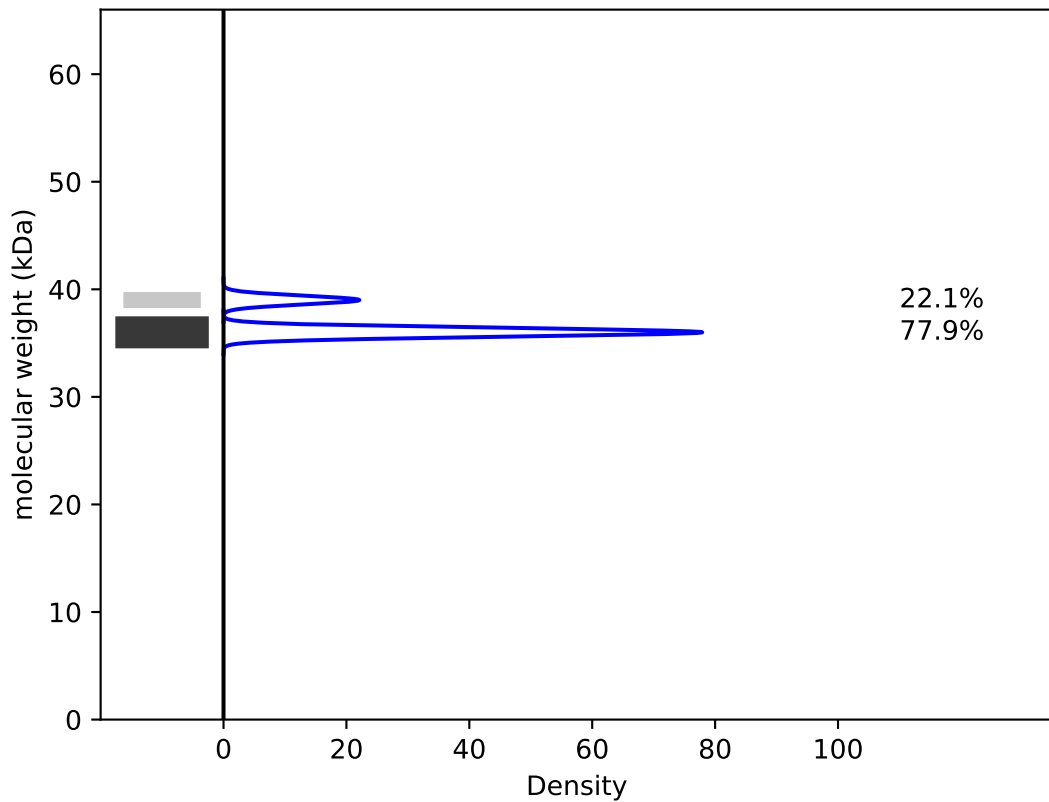

# Q4G0N4

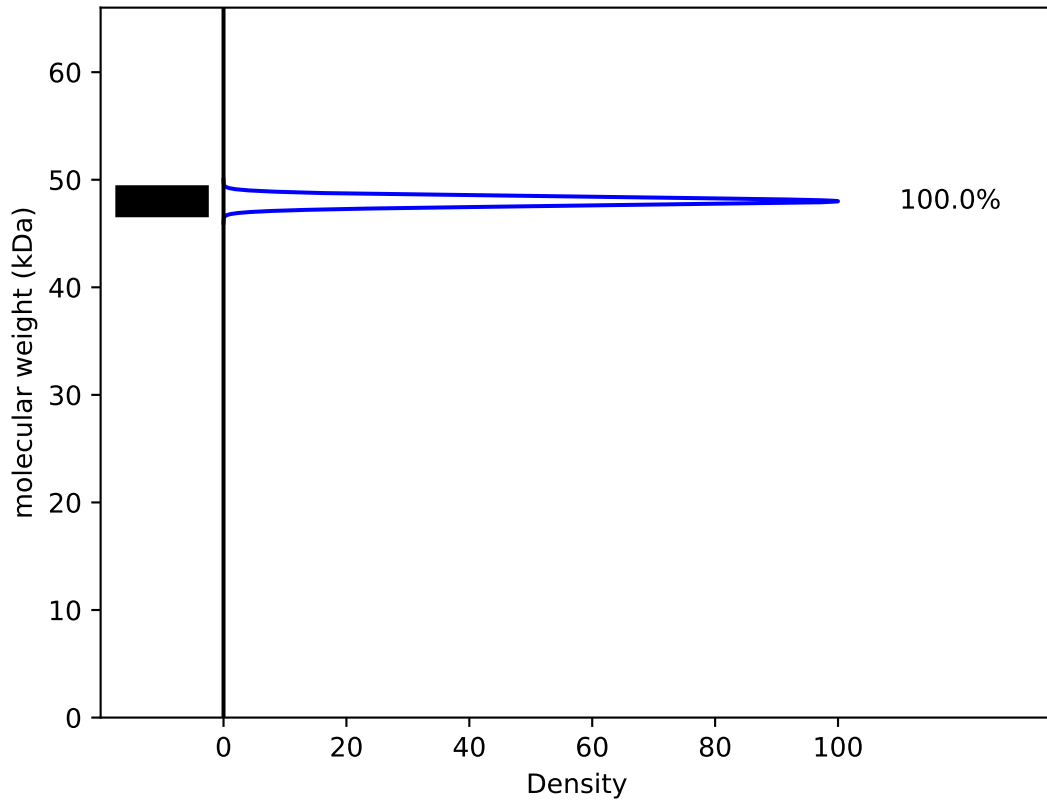

# Q53FT3



# Q53GQ0

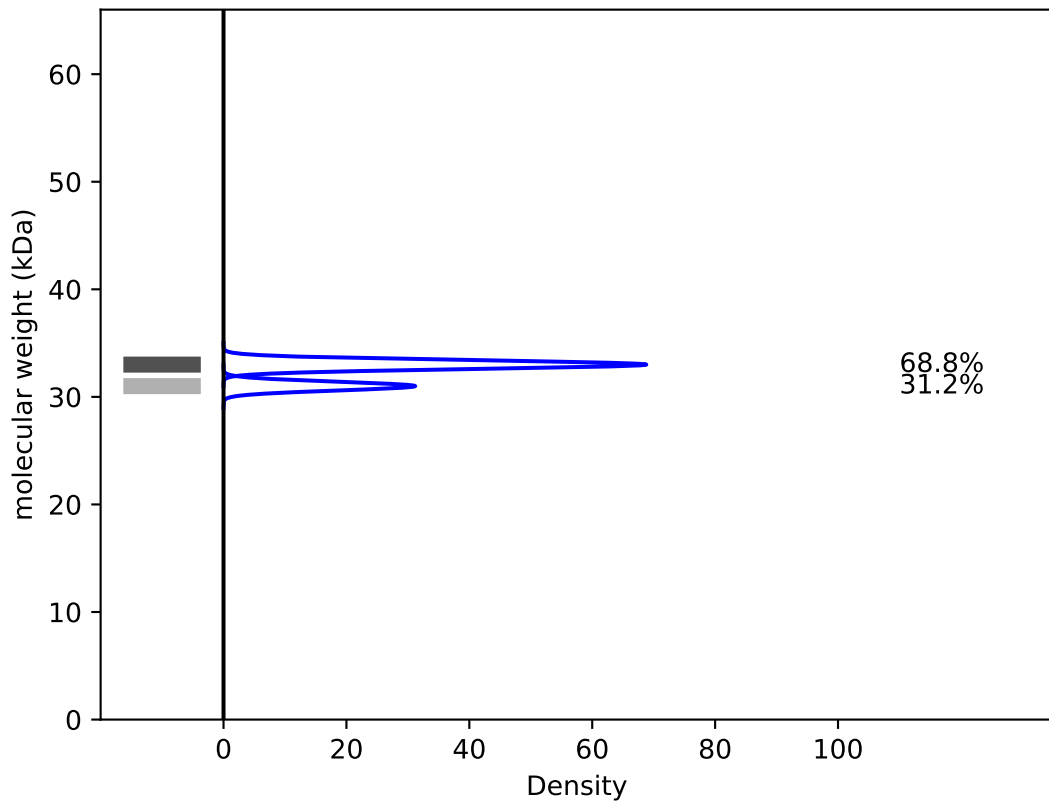

# Q562R1



# Q5JUR7



# Q5RKV6





# Q5T6V5



# Q5VT79

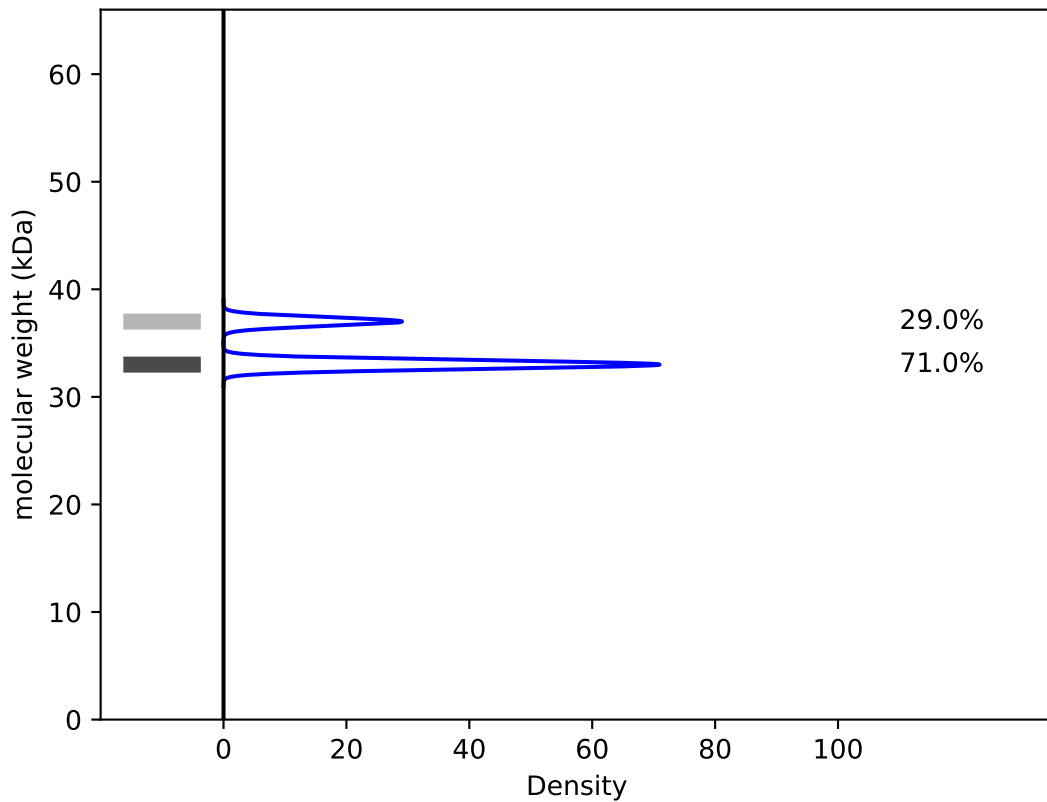

# P13928



# Q5VWZ2

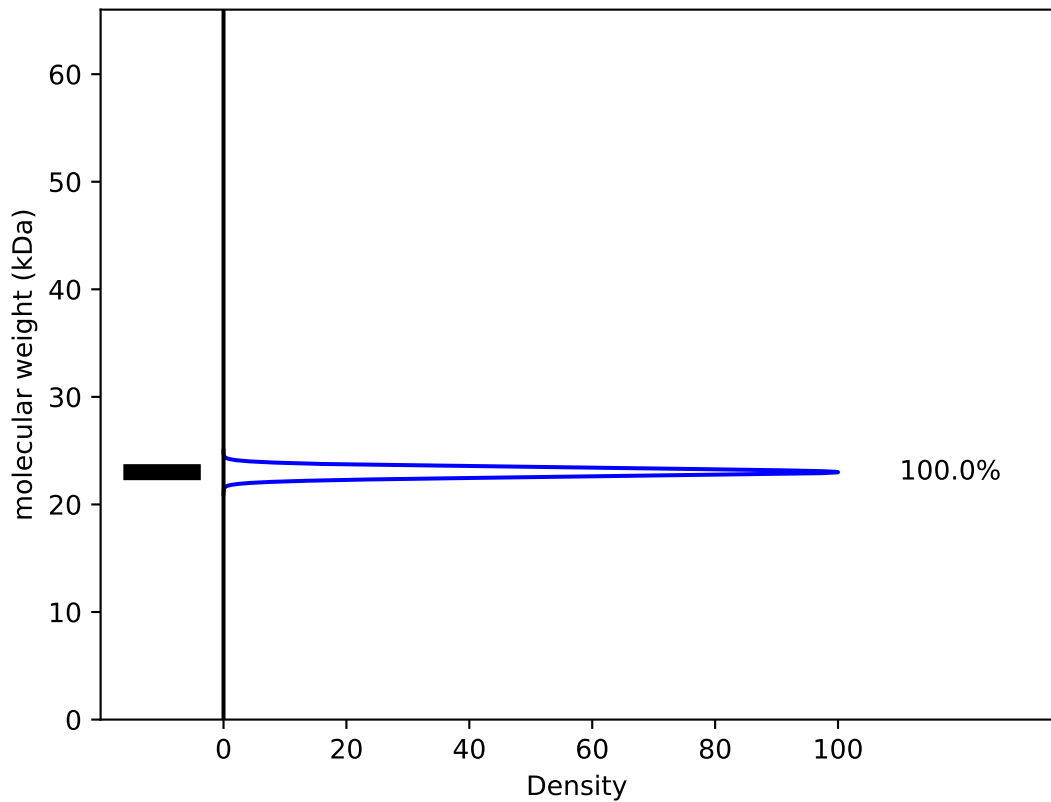

# Q69YN2



# Q6DD88



# Q6DKI1

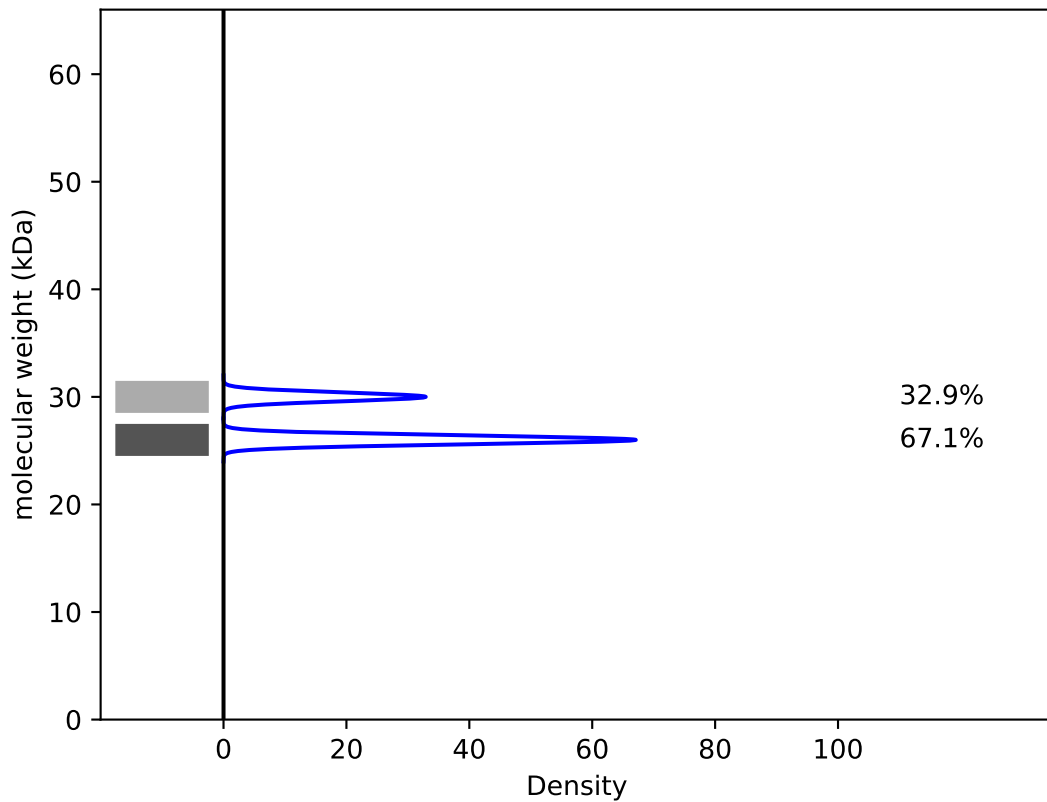

# Q6FI81

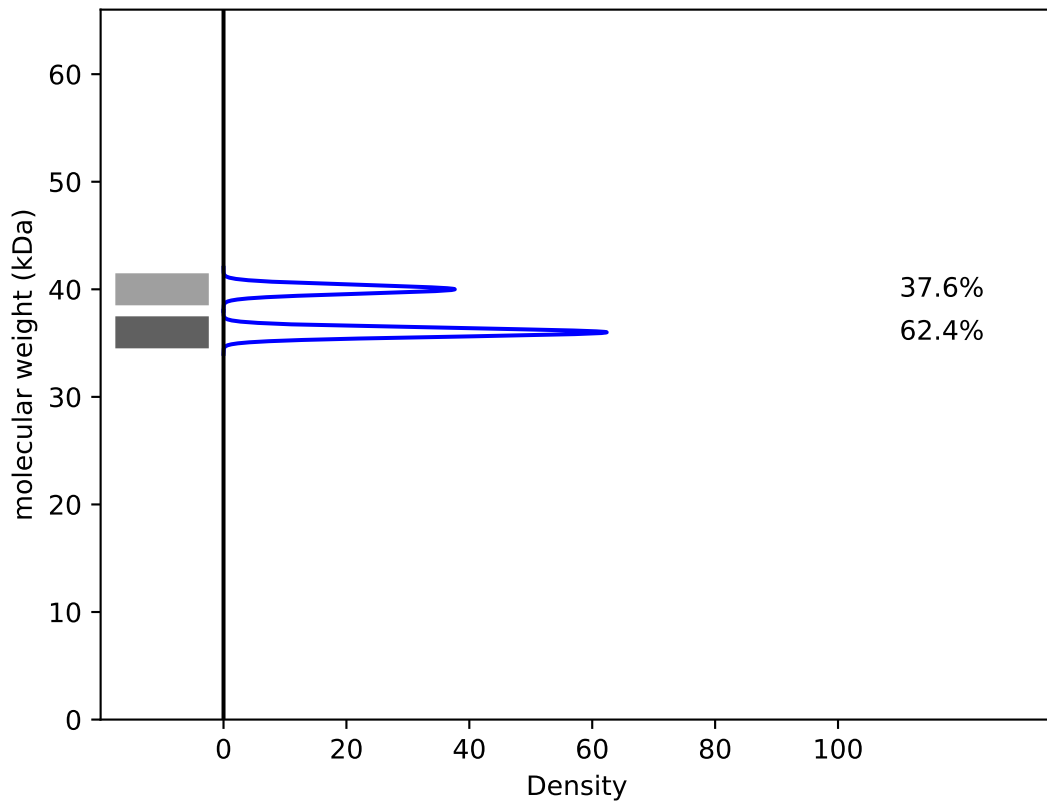



# Q6IBS0



# Q6NVY1



# Q6NZI2

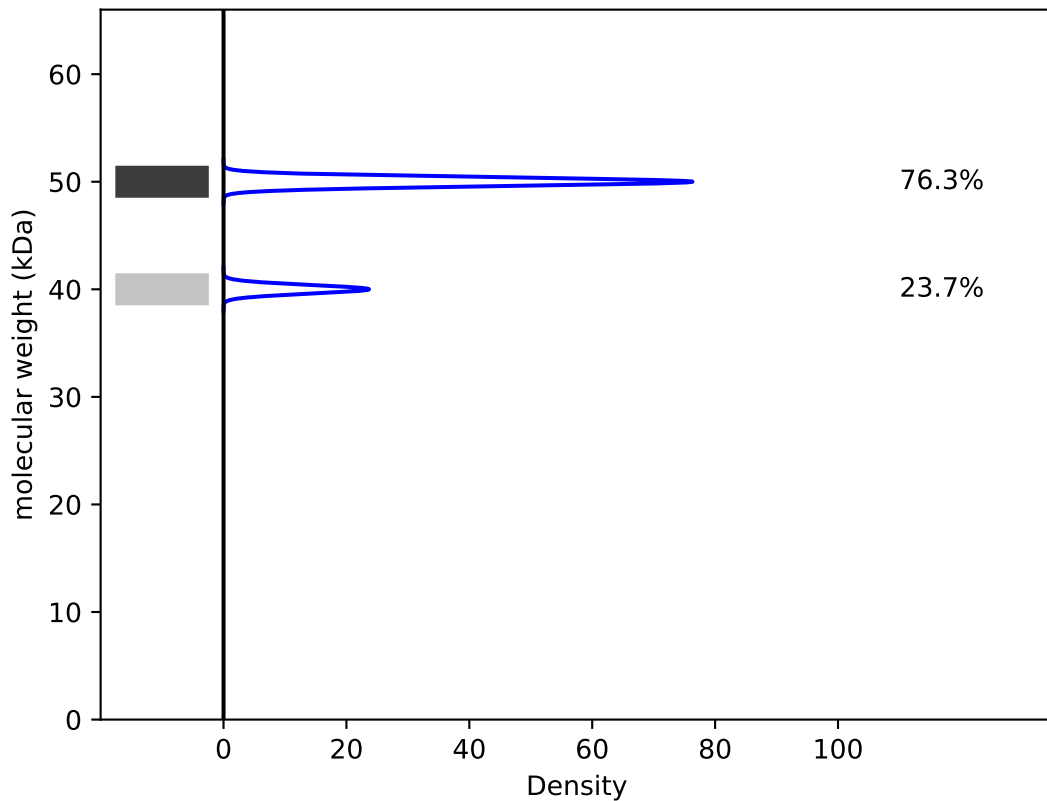

# Q6P1J9



# Q6P587



# Q6YN16



# Q70UQ0

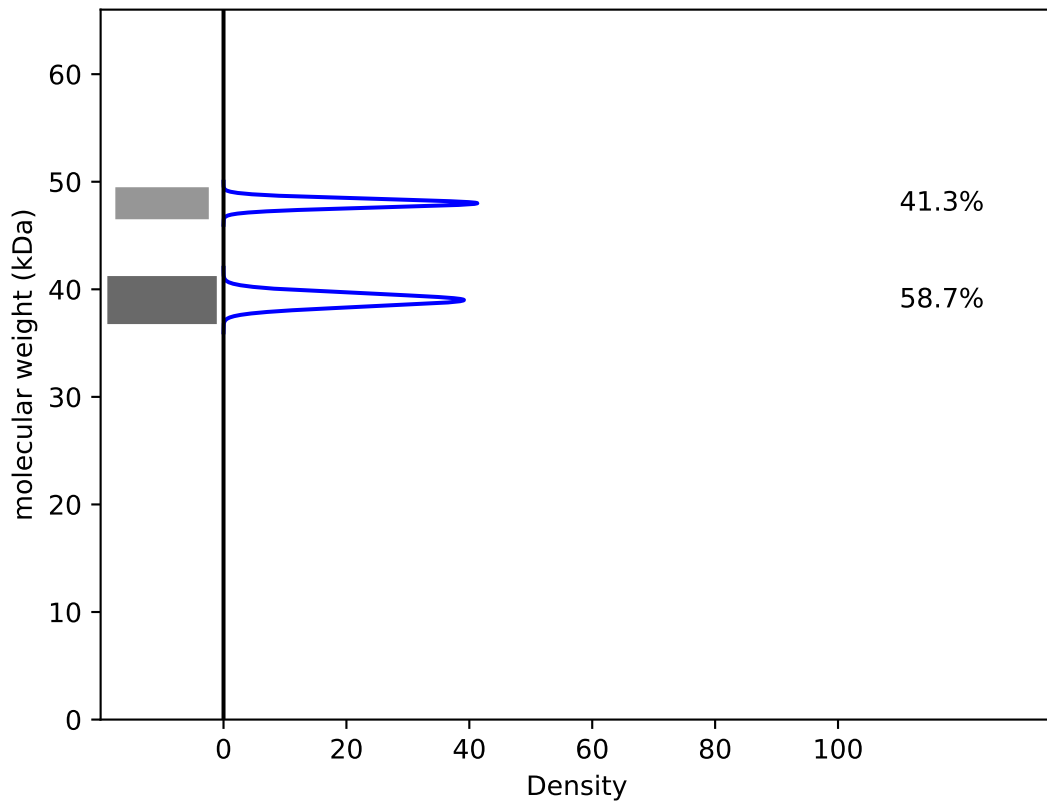

# Q7L1Q6





# Q7L2H7



# Q7L5N1

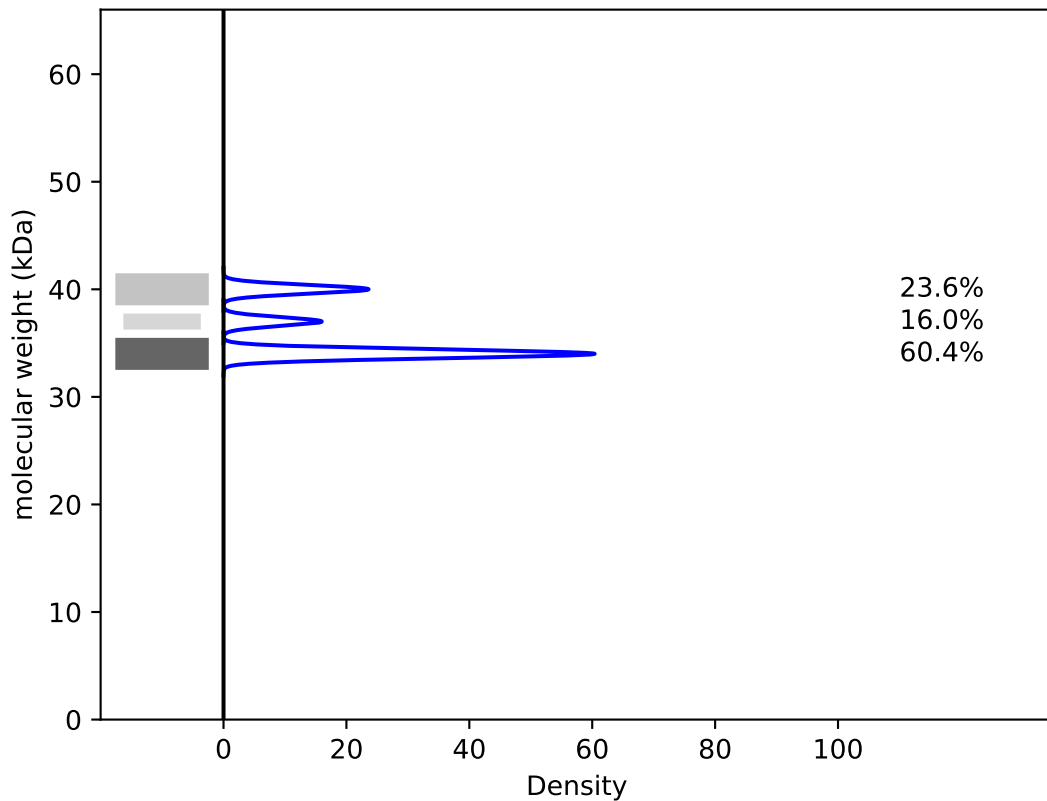

# Q9H8S9



# Q7L9L4



Q7Z2W9



# Q7Z4H8



# Q7Z4W1

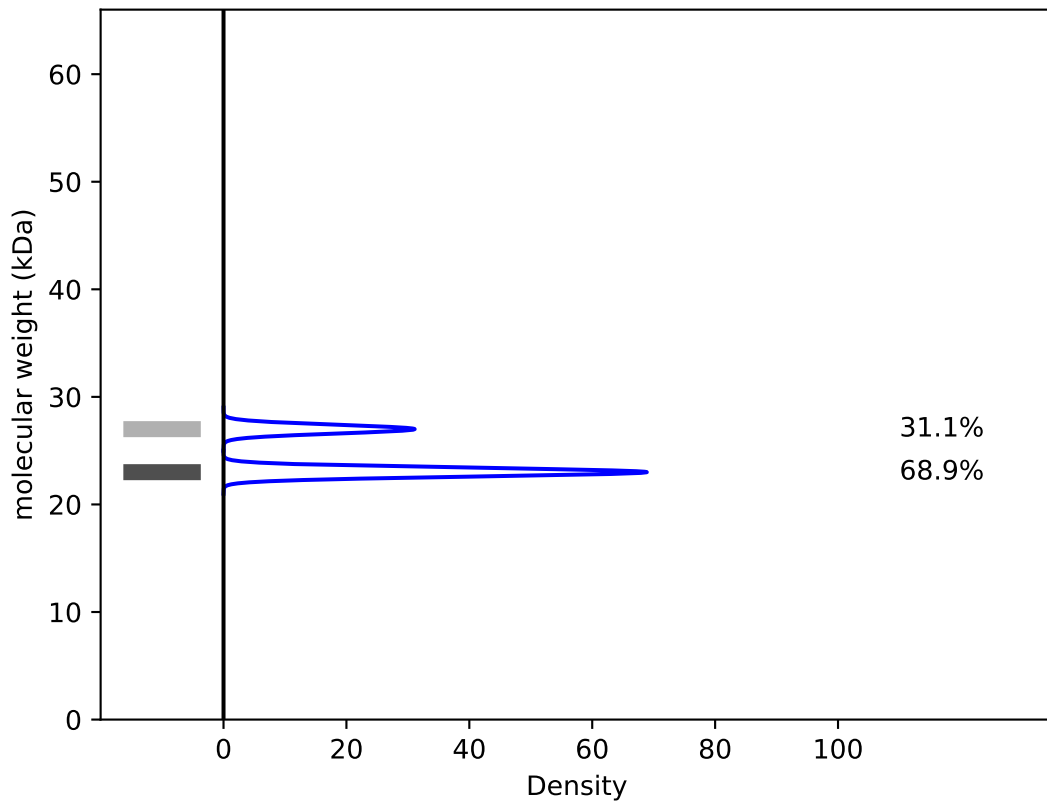

# Q7Z7H5

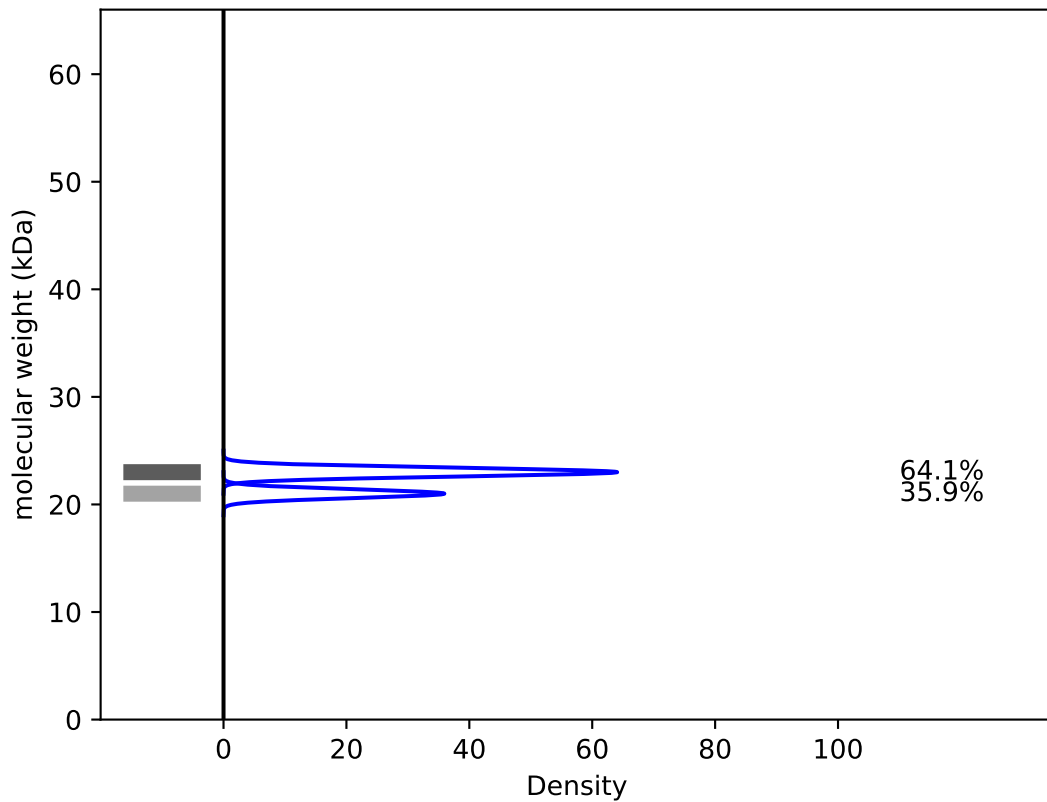



# Q86V81

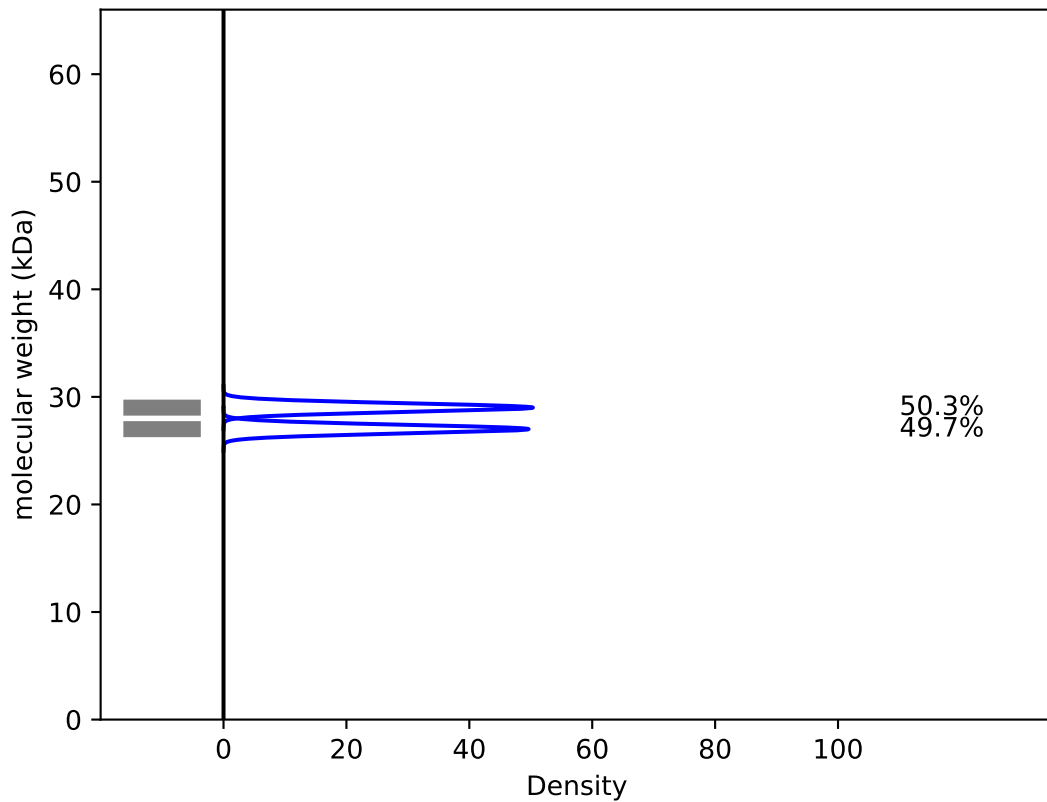

# Q86W42

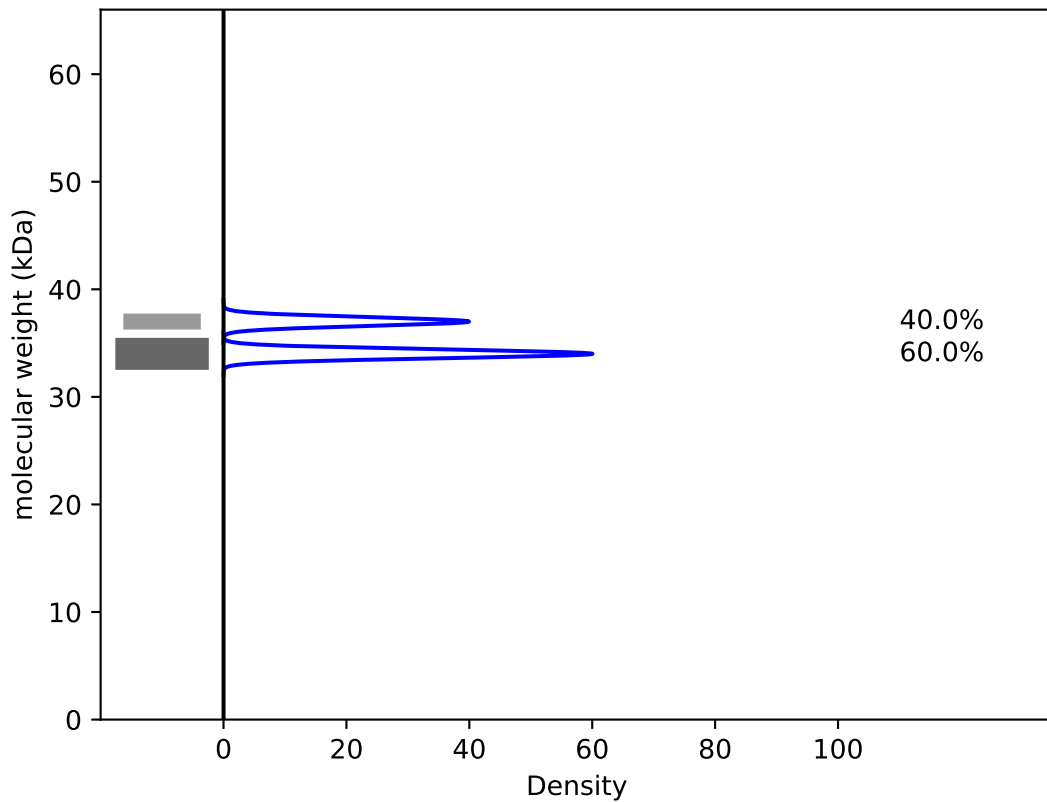

# Q86X76



# Q8IURO



# Q8N183



# Q8N4Q0



# Q8NBJ7

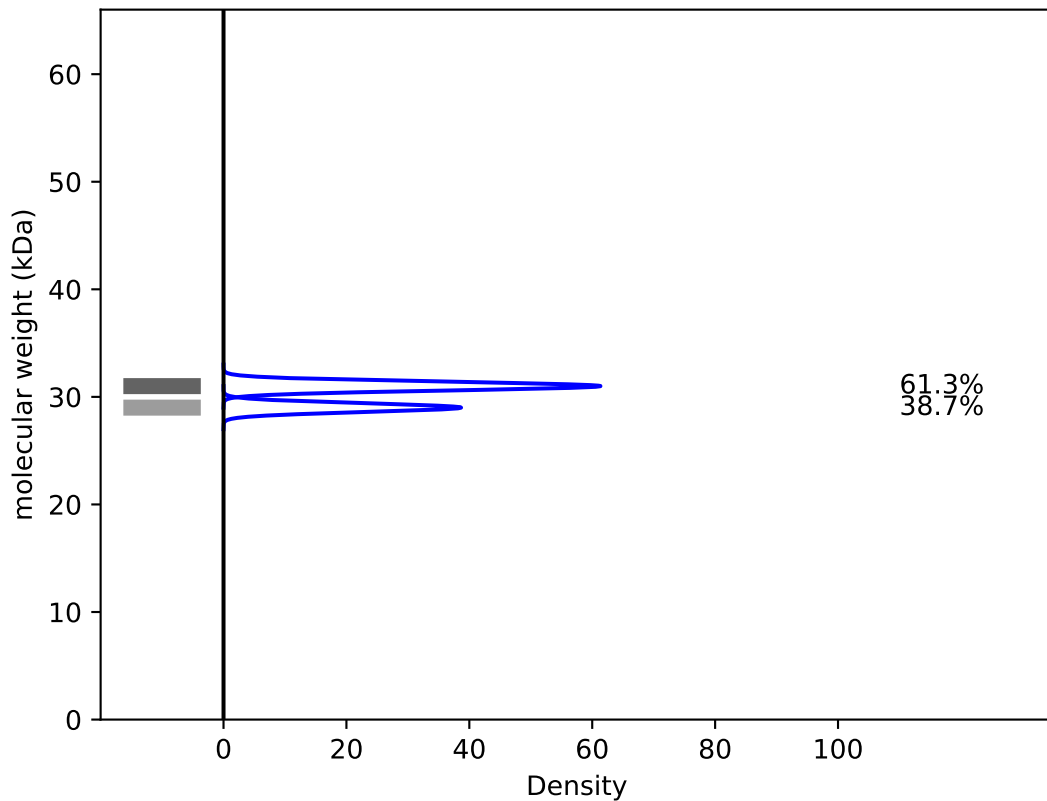

# Q8NBN7

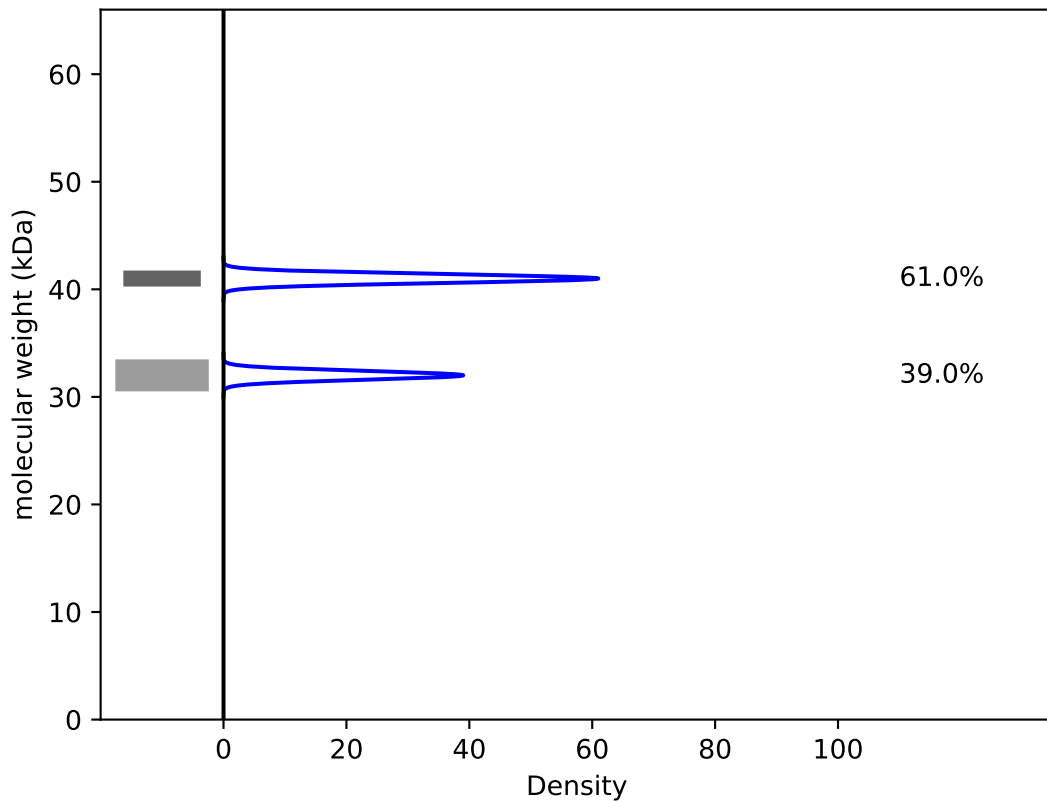



# Q8NBQ5

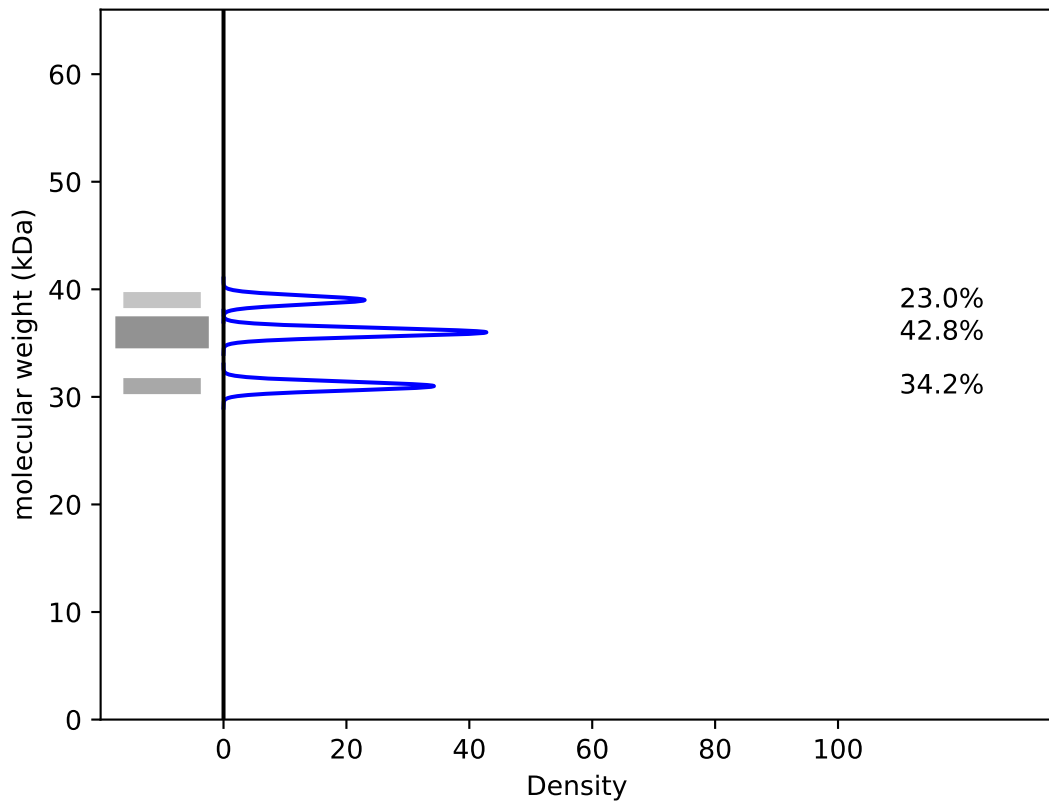

# Q8NBS9



# Q8NBT2



# Q8NBU5



# Q8NBX0



# Q8NC51

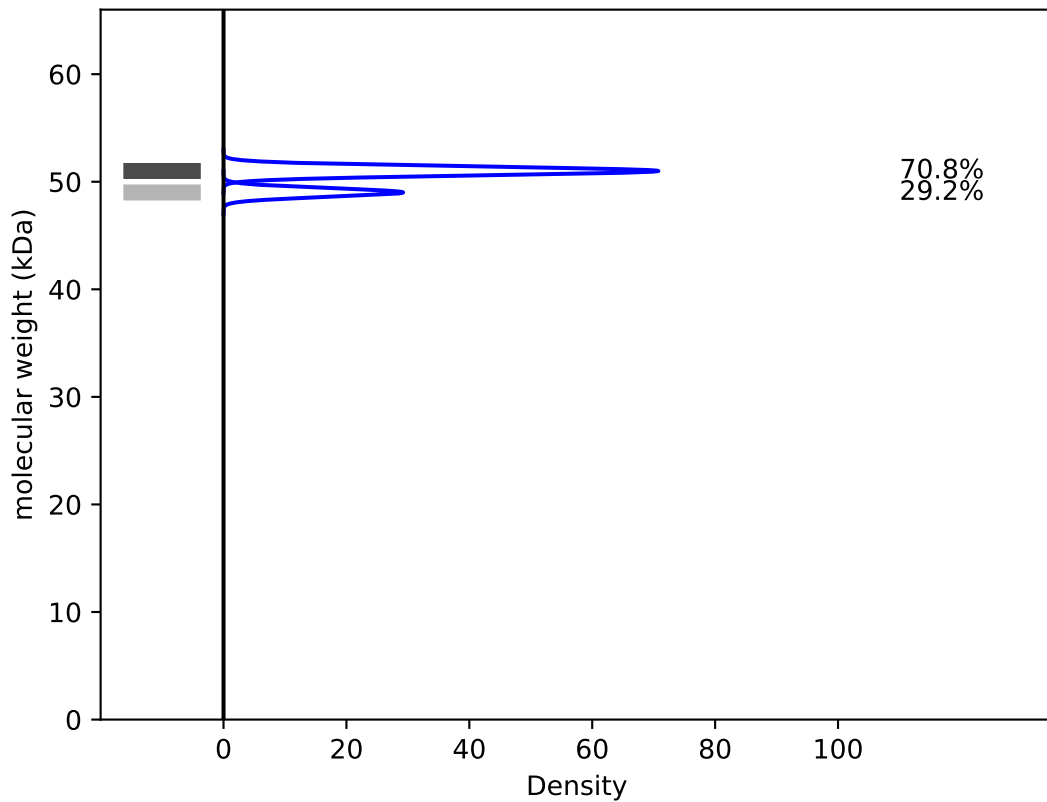

# Q8NEJ9



# Q8NF37





# Q8NFH3



# Q8NFH4



# Q8NFH5



# Q8TAE8



# Q8TC12

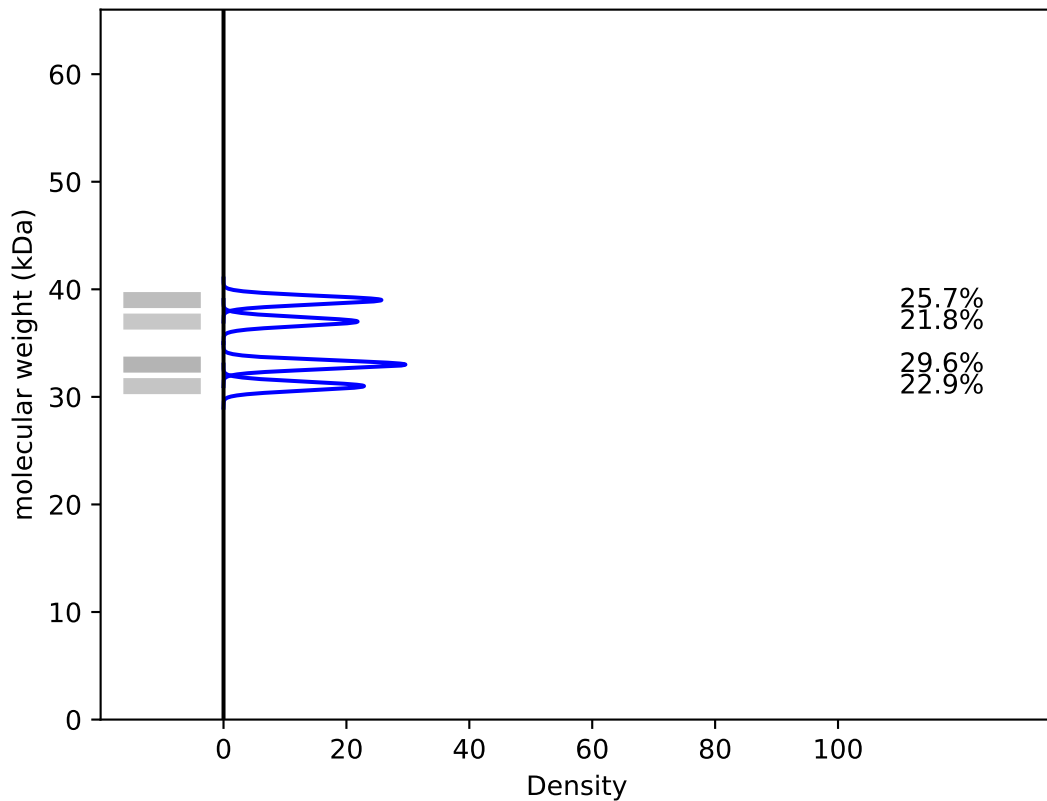

# Q96NR8

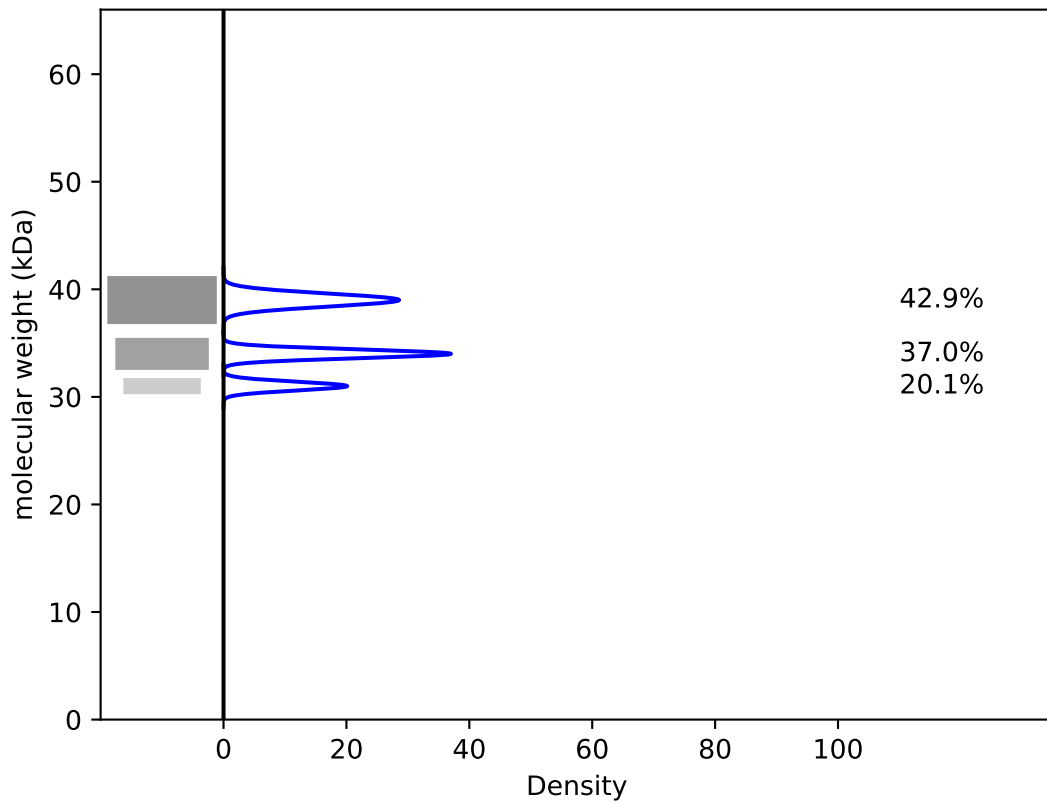

# Q8TDN6



# Q8TEA8

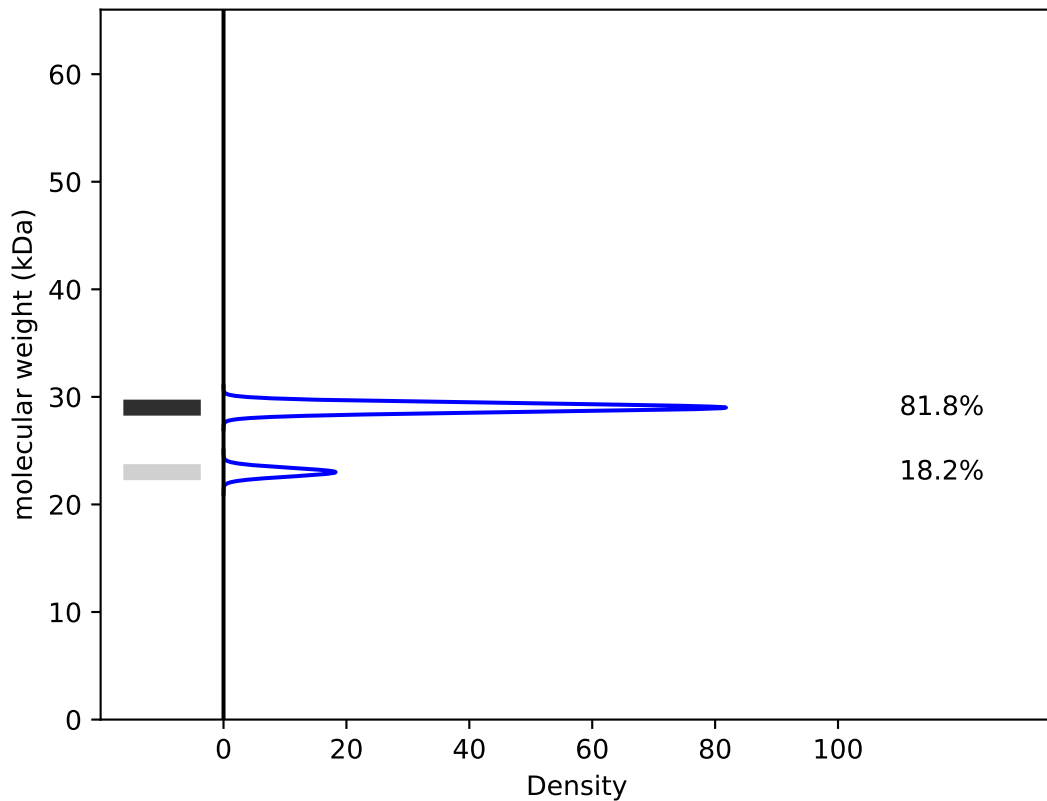



# Q8TED1

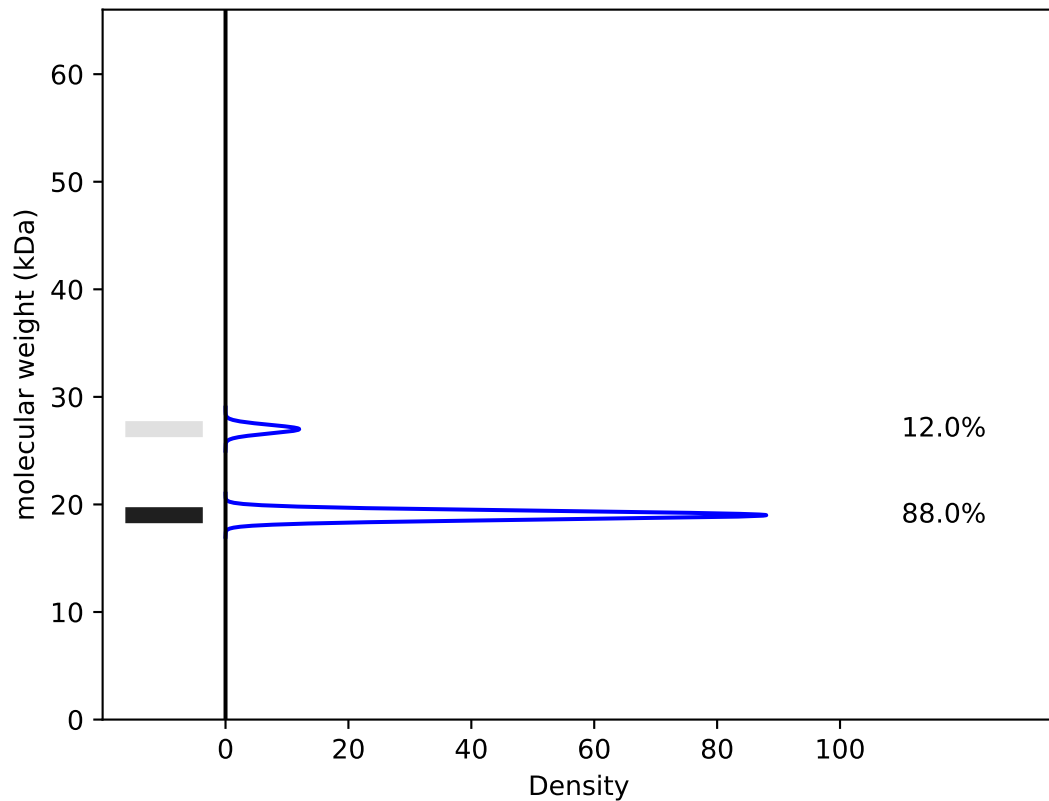

# Q8WUK0

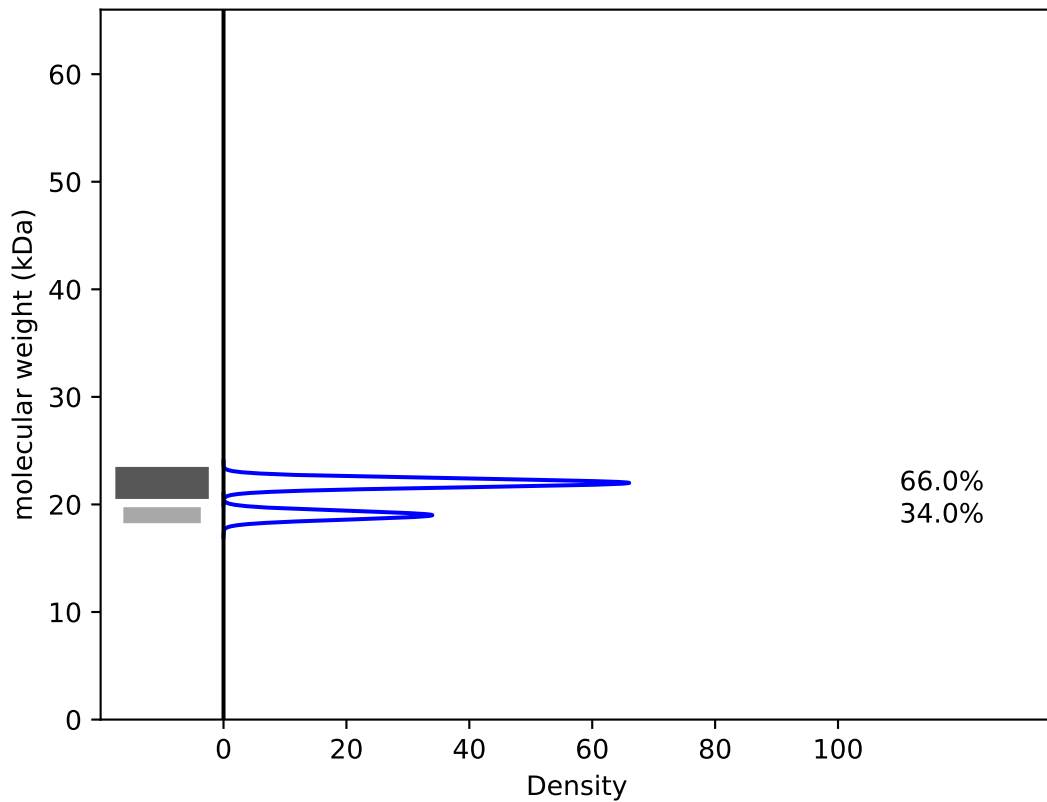

# Q8WUY1

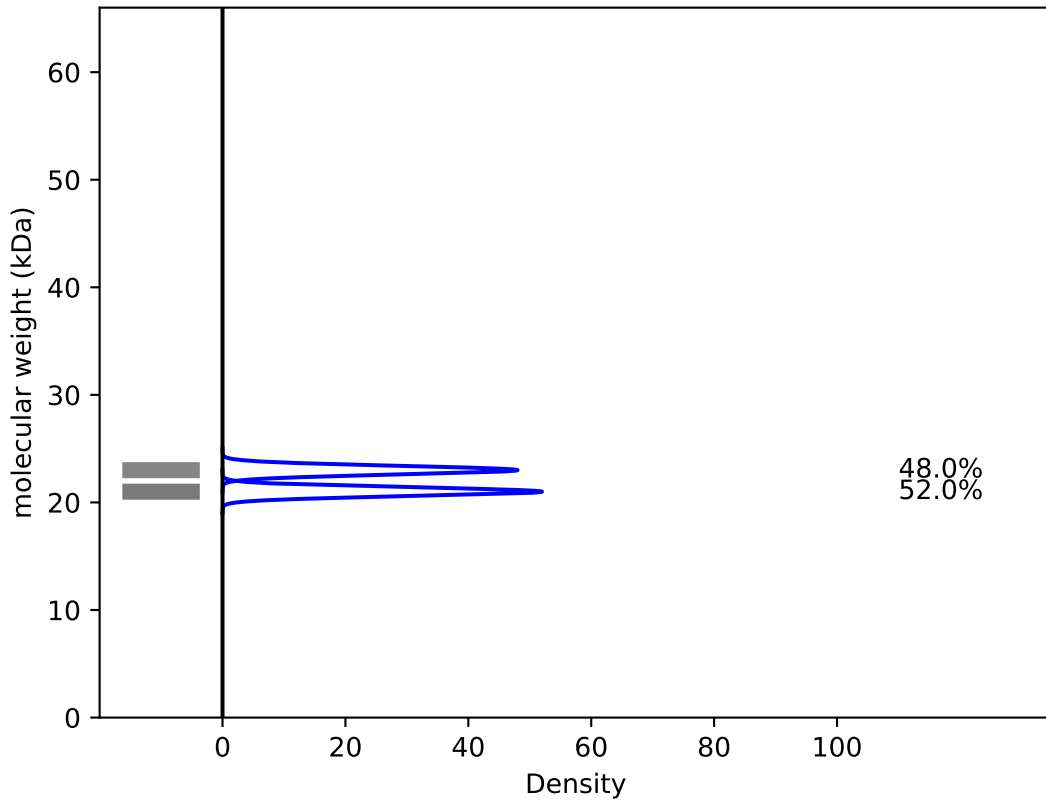

# Q8WVM0

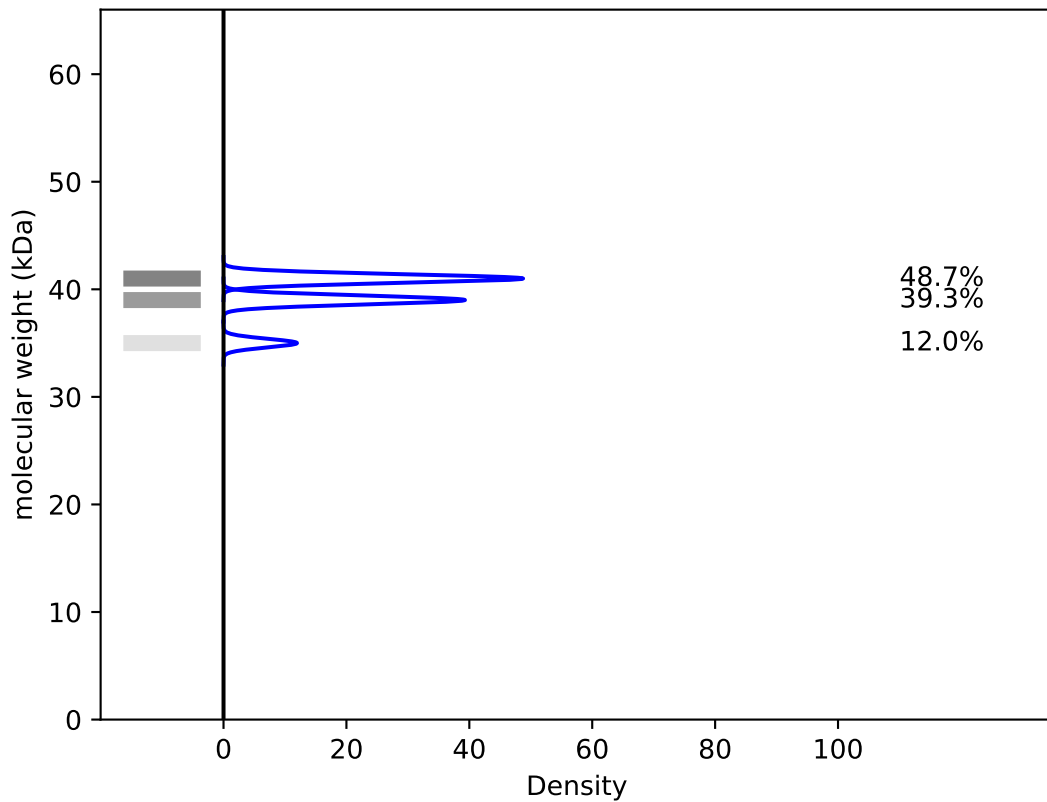

# Q8WVX9



# Q8WVY7



# Q8WW12



# Q8WWY3





# Q8WXF1



# Q92520



# Q92522

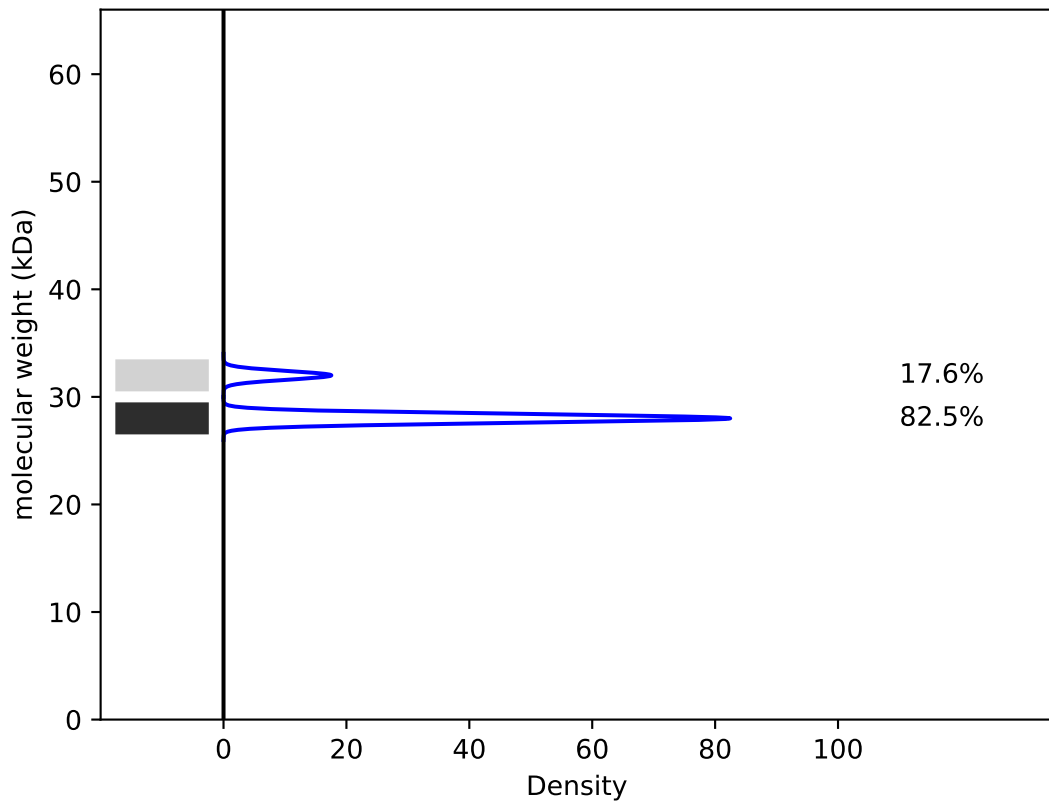

# Q92552



Q92572



# Q92600

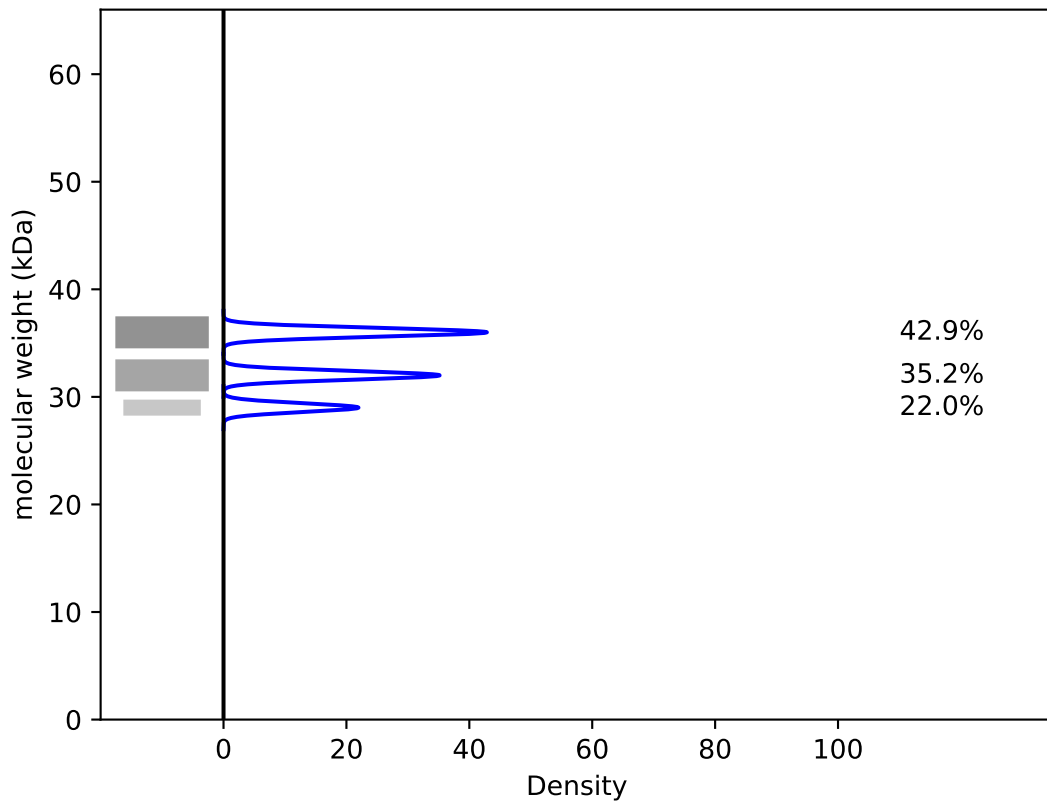

Q92688



Q92734





Q92747



Q92769



# Q92820

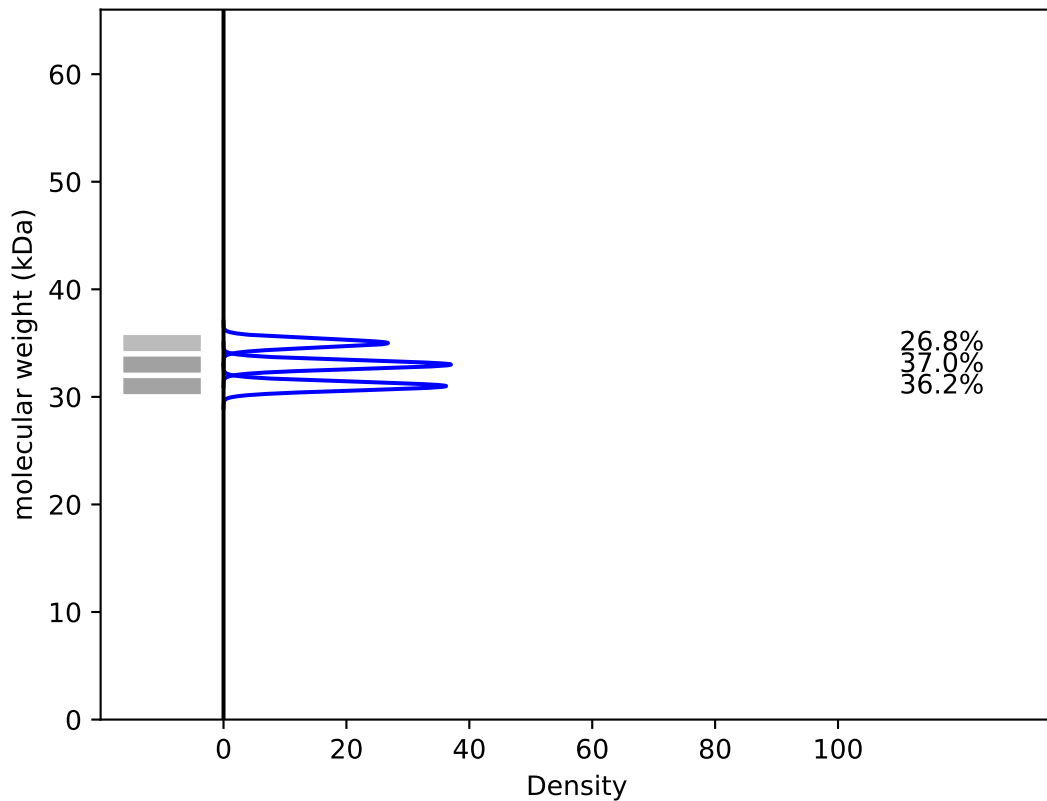

Q92879



O95319



Q92882



# Q92890

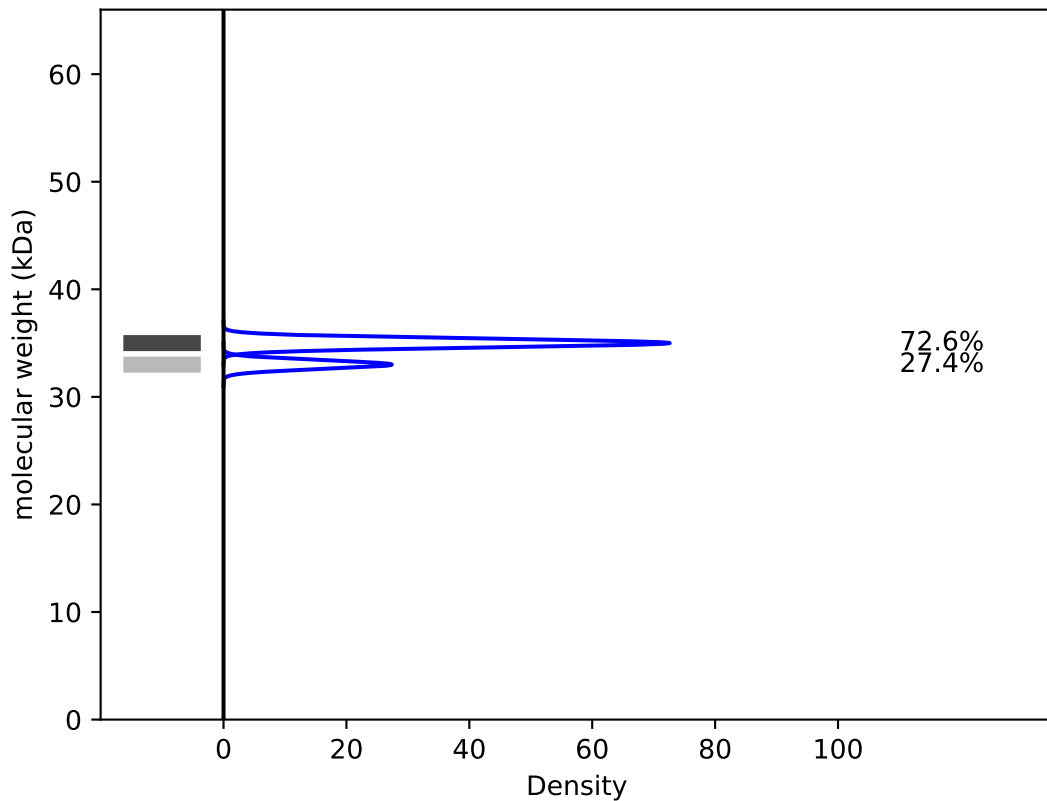

# Q92905





# Q92979

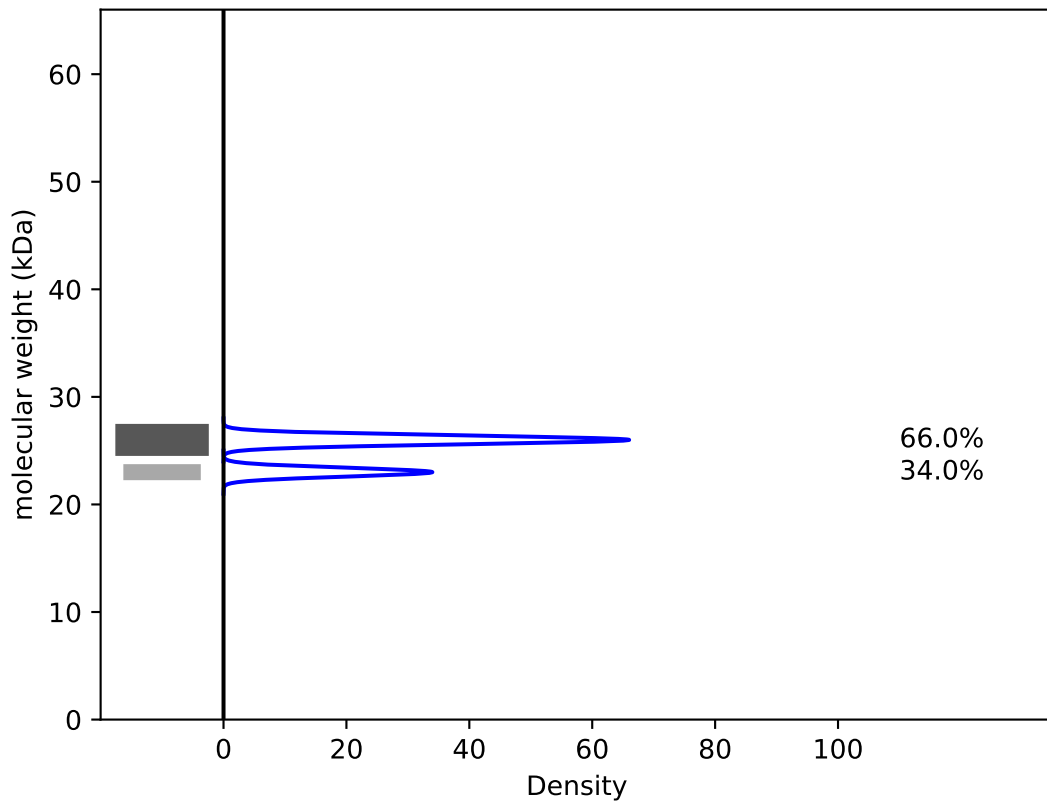

# Q969G3



# Q969U7

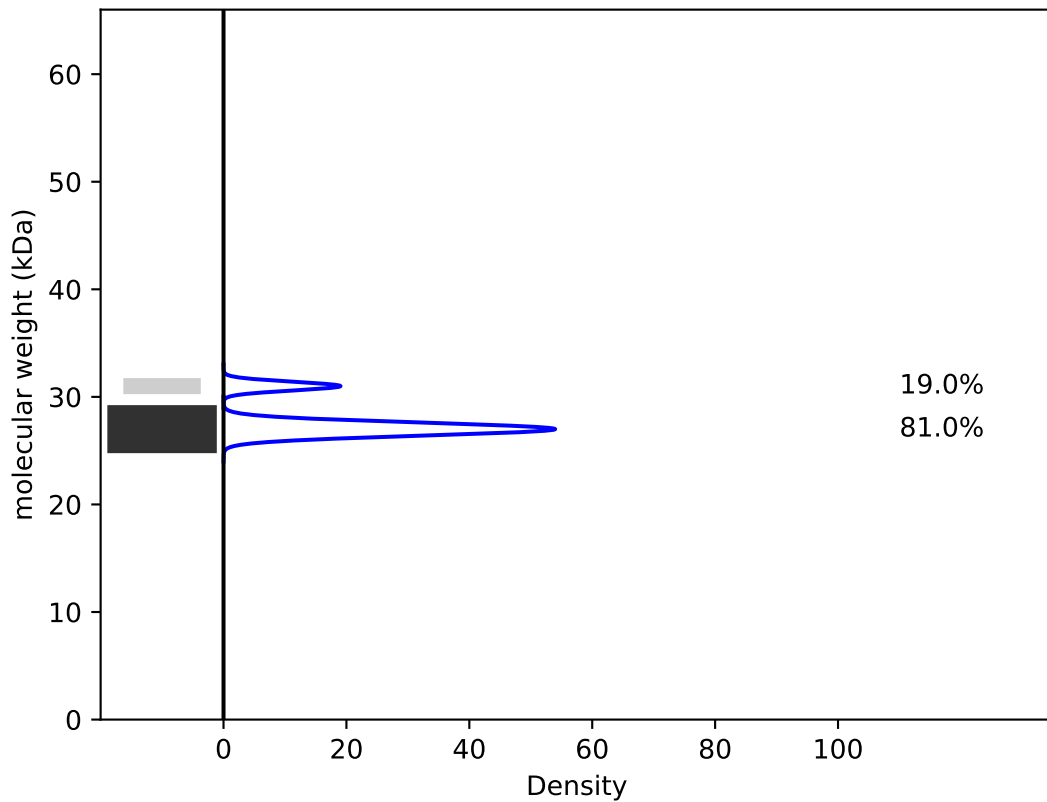

# Q969X5

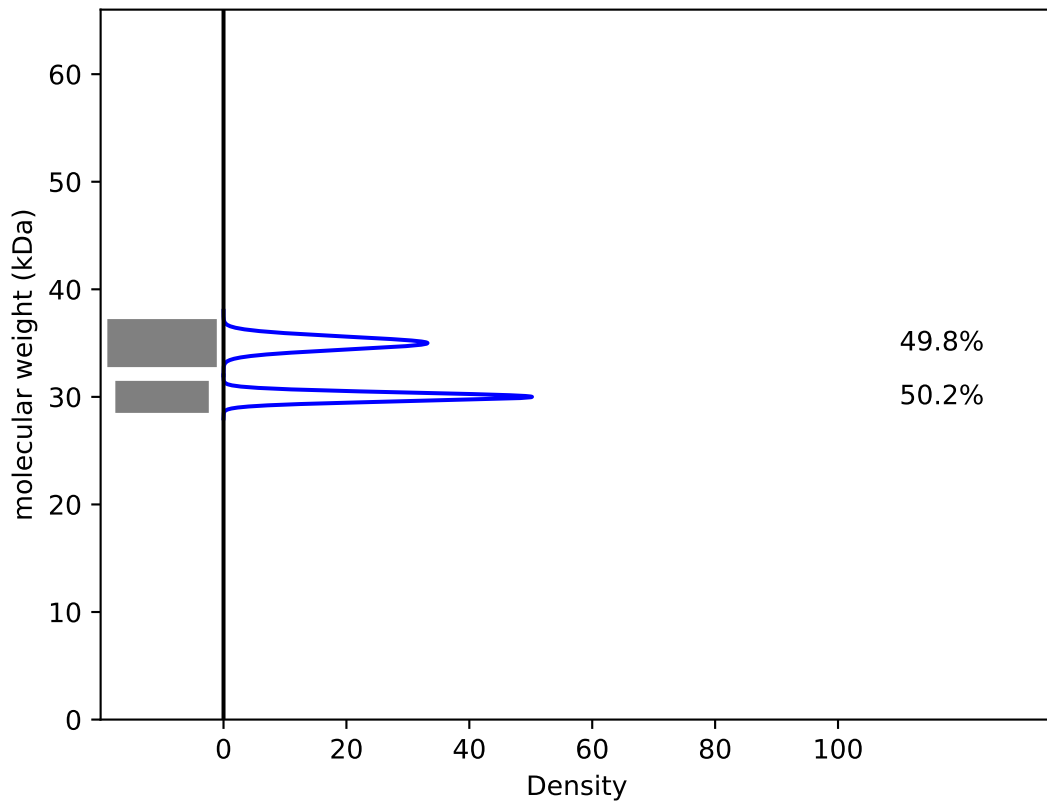

# Q96A33



# Q96A35



# Q96A72

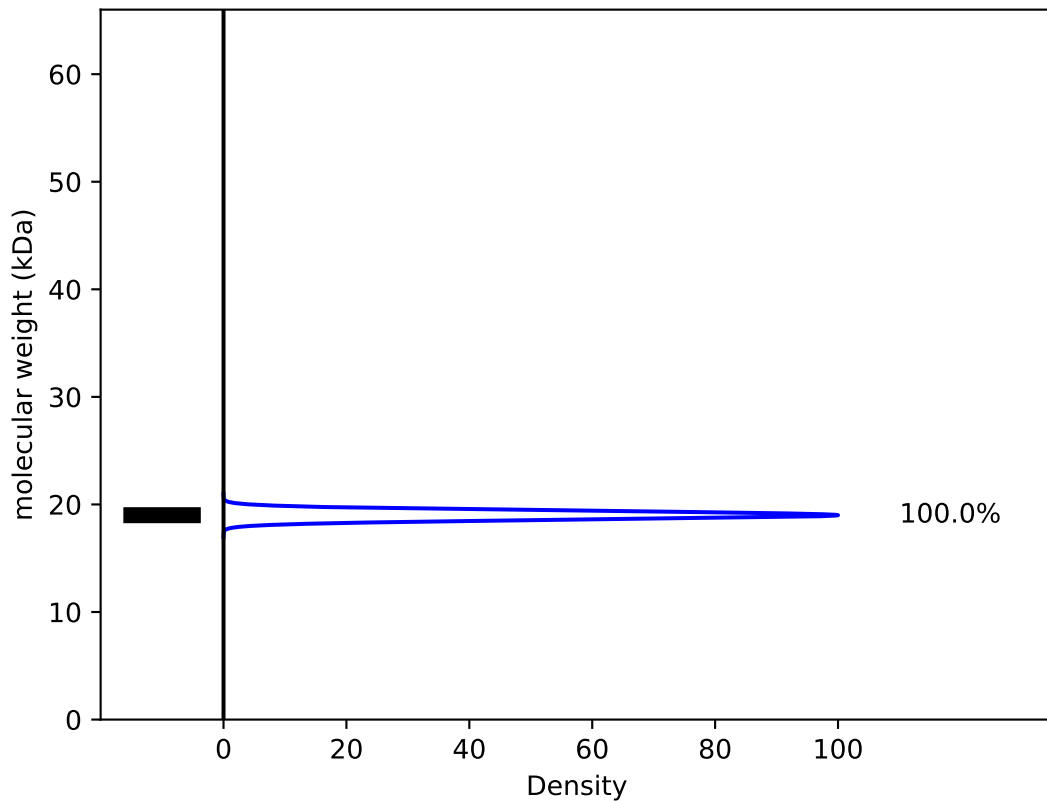

# P61326





# Q96AB3



# Q96AG4



# Q96BM9

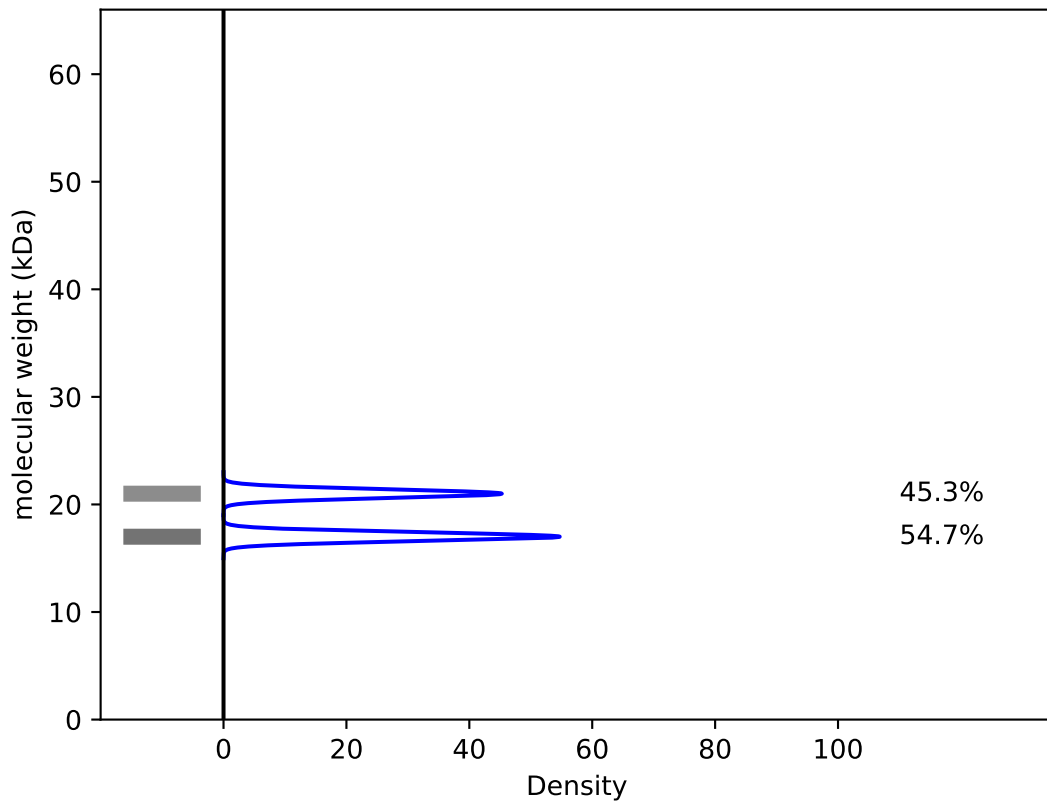

# Q96C19



# Q9BUP0



# Q96C23



# Q96C36



# Q96C86

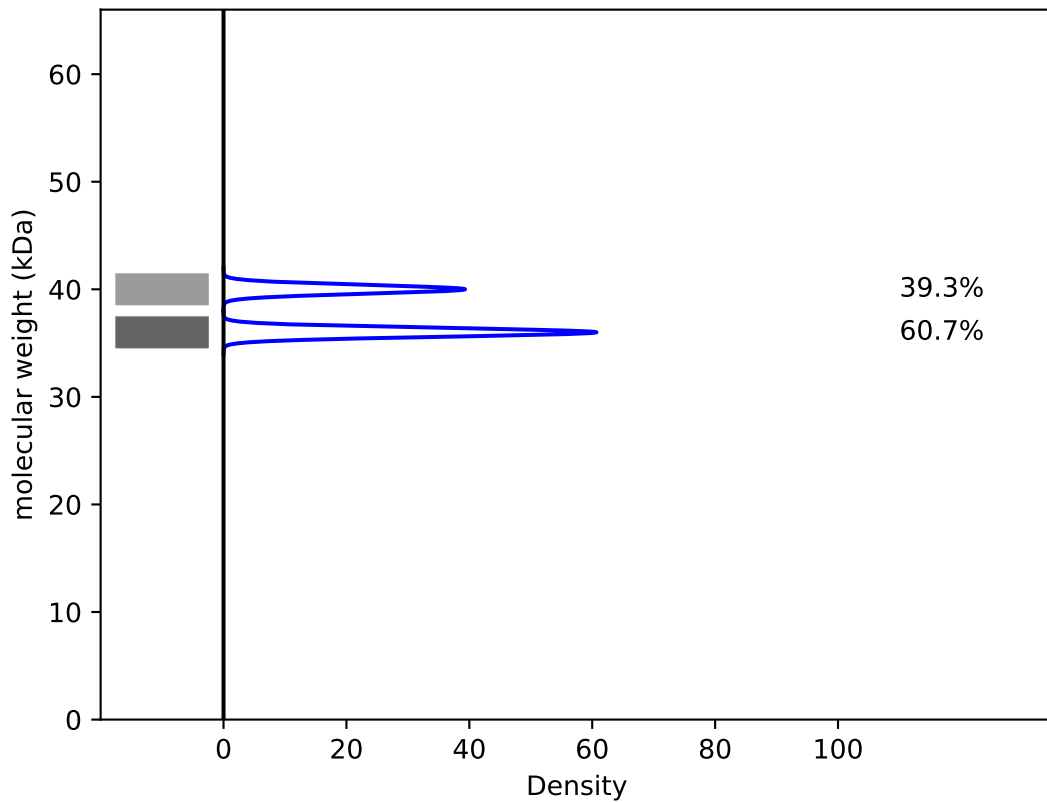



# Q96CS3

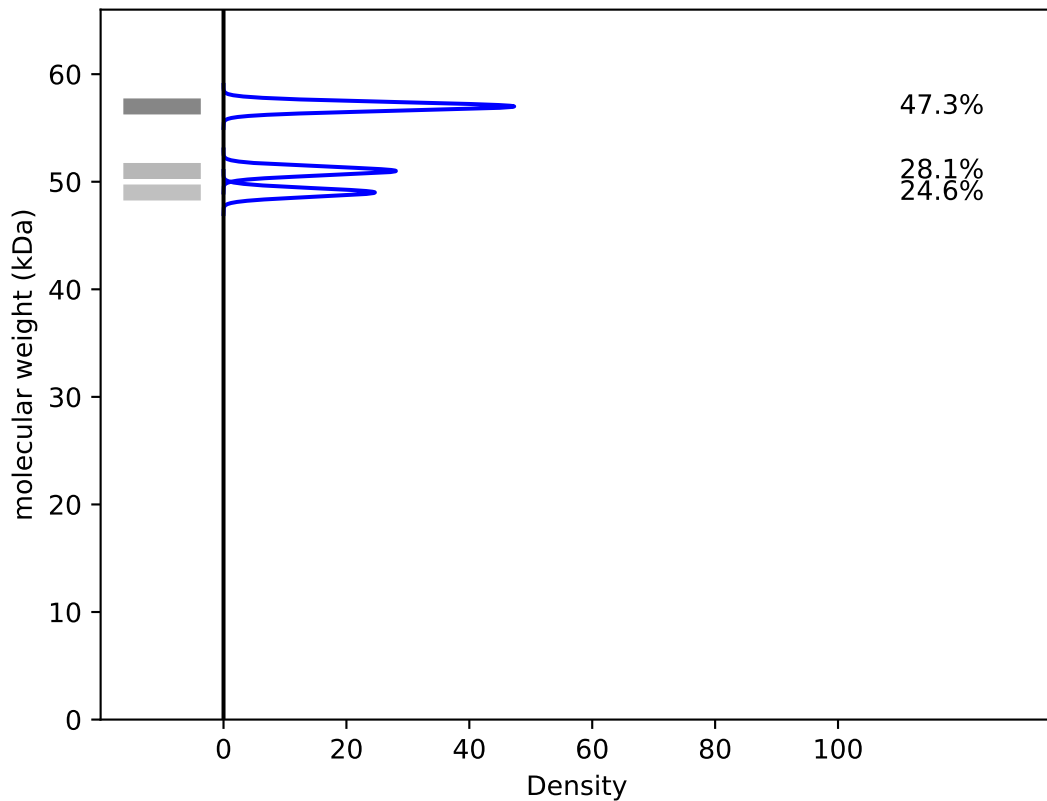

# Q96CW1

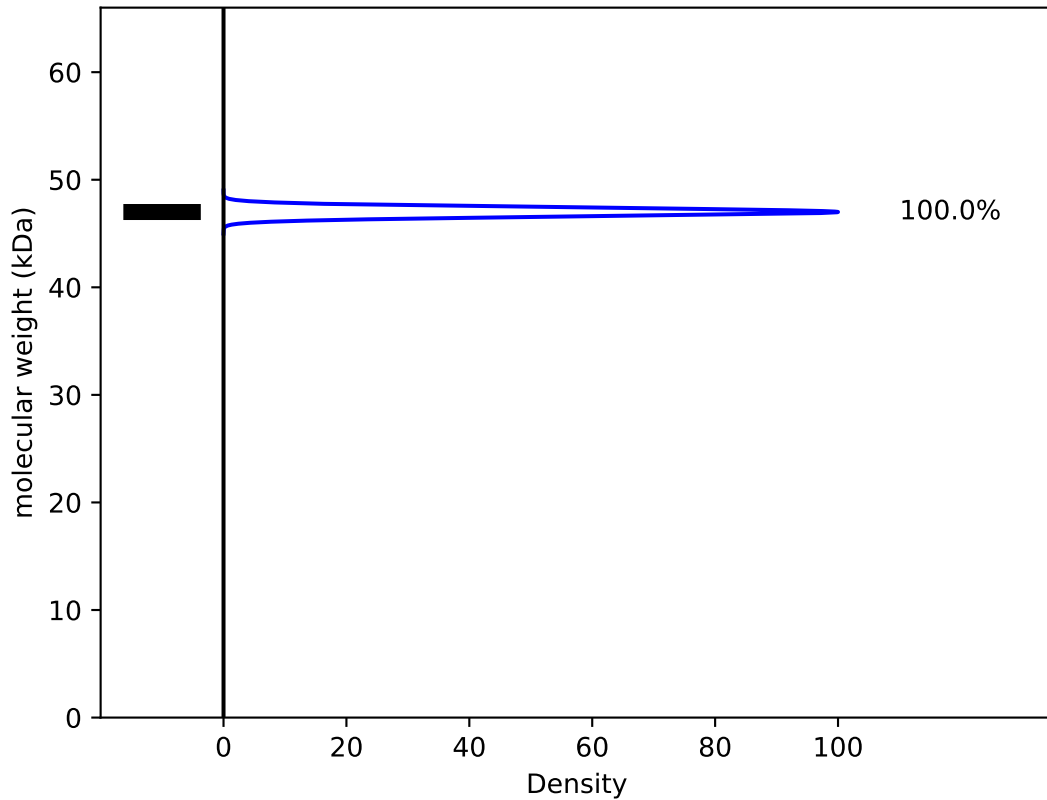

# Q96DB5



# Q96DI7



# Q96EE3

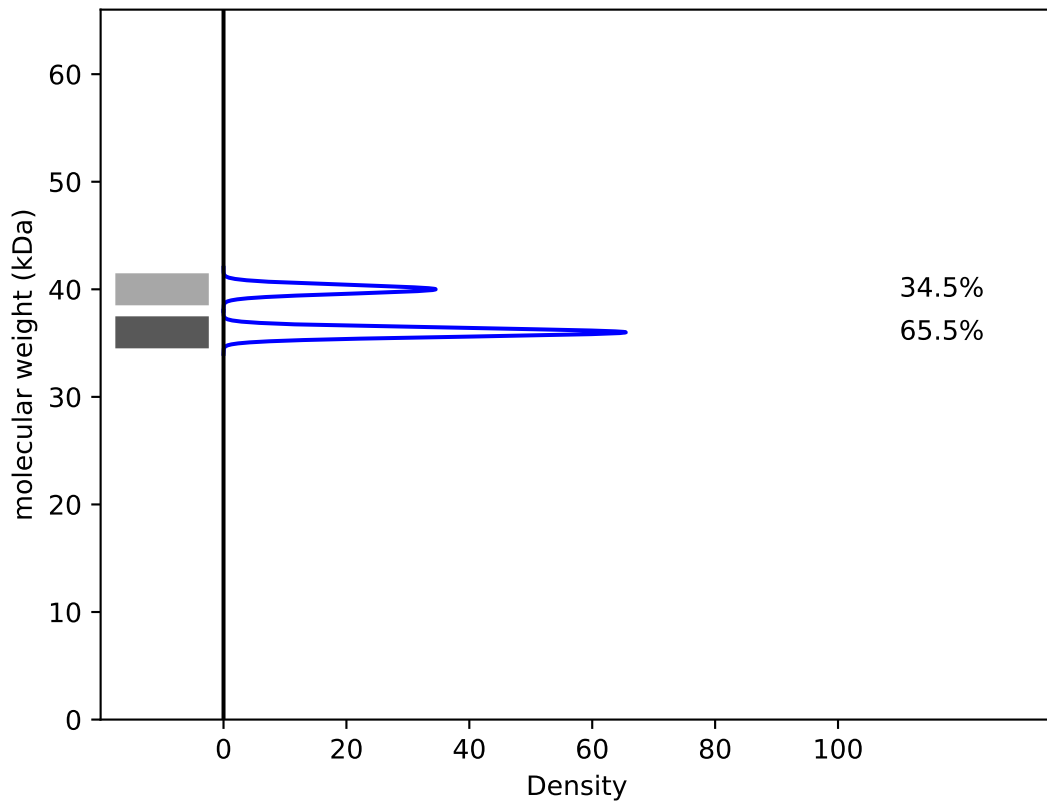

# Q96EK6

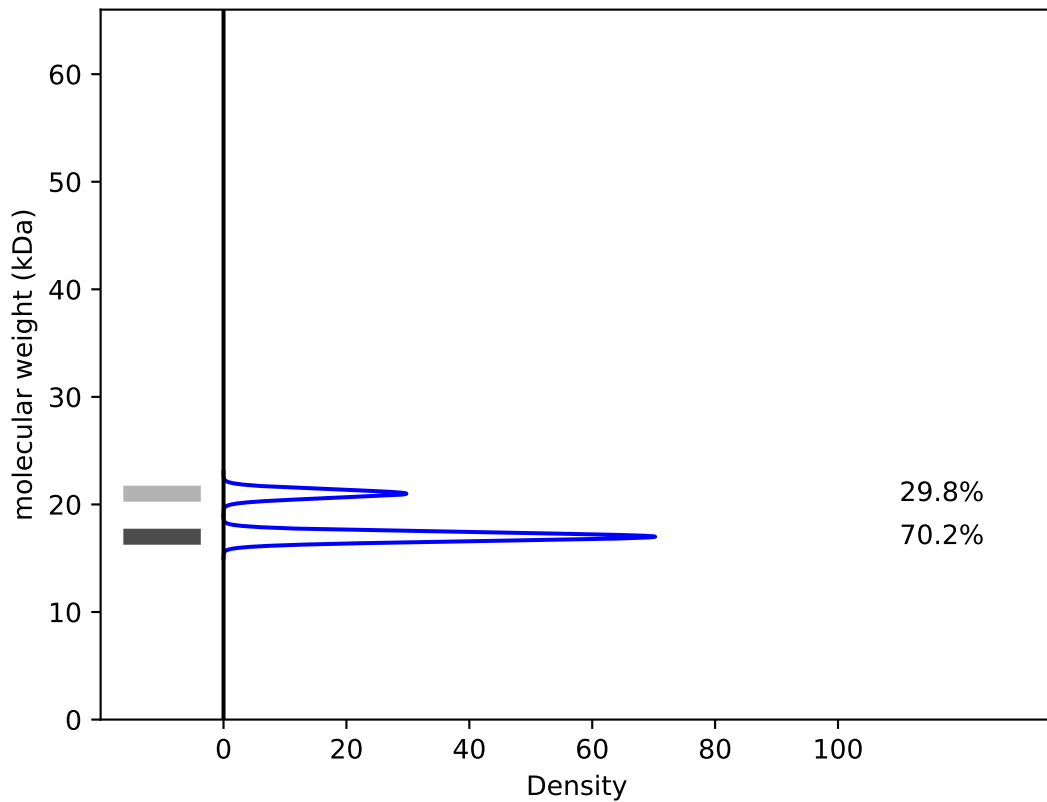

# Q96FW1

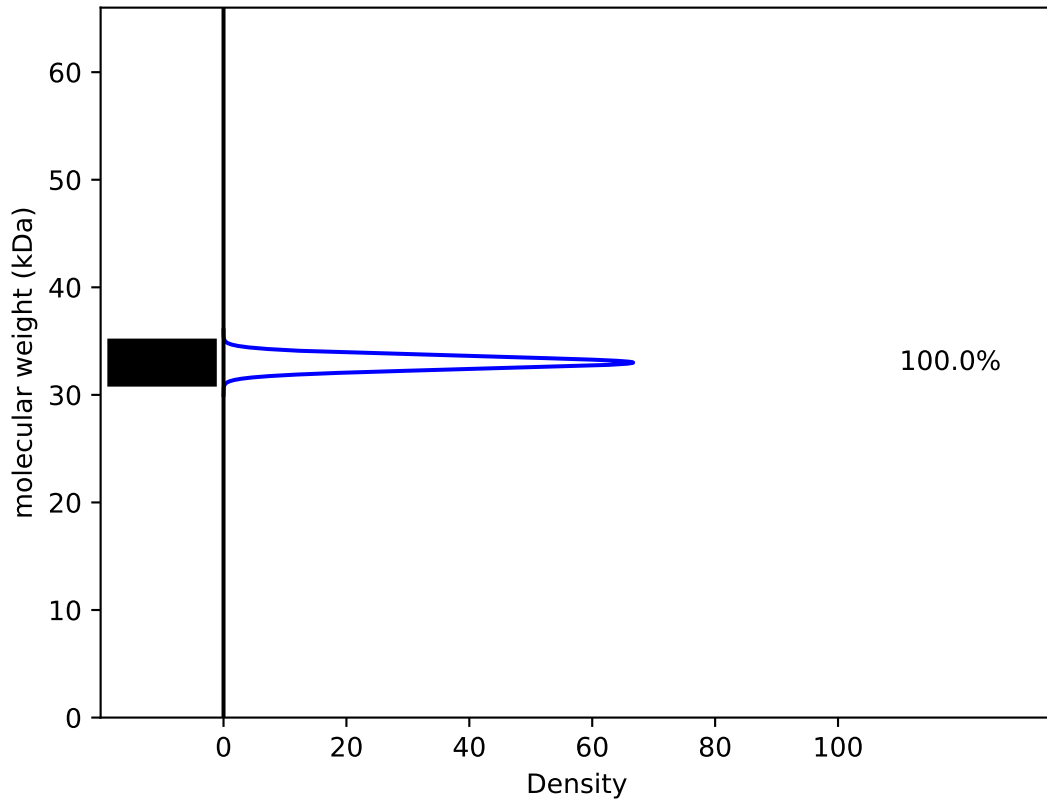

# Q96FX7





# Q96HE7



# Q86YB8



# Q96HS1

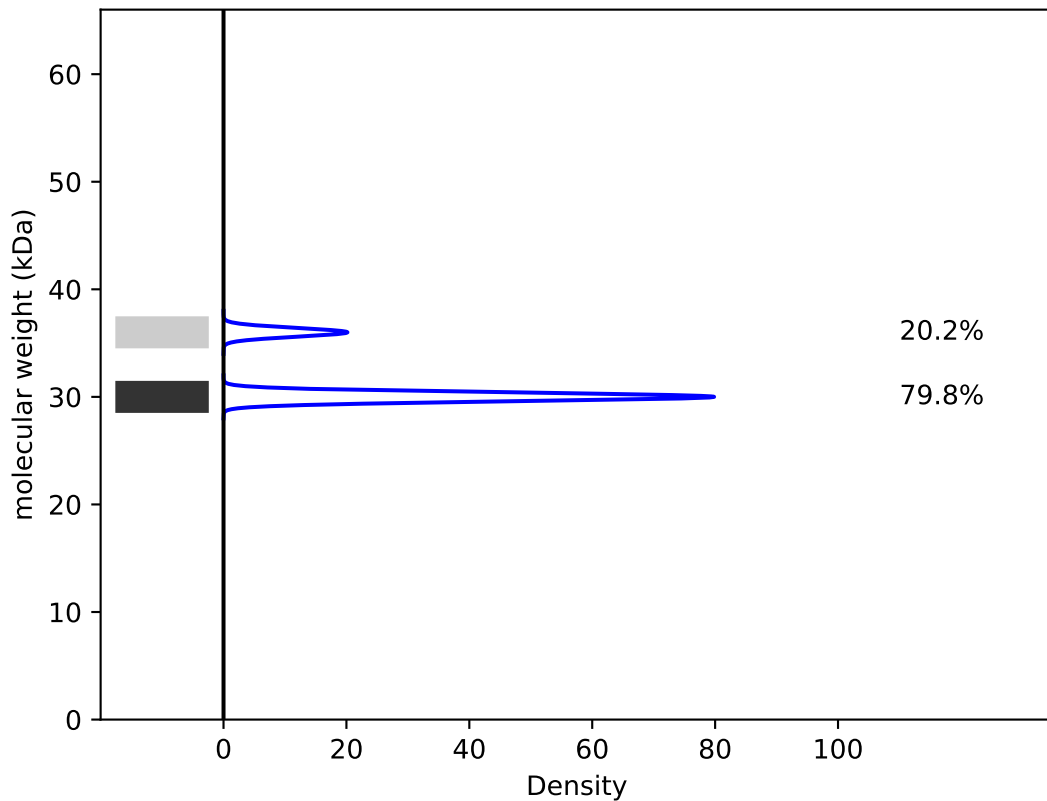

# Q96HY6



# Q96I24



# Q96I25



# Q96IJ6



# Q96IR7





# Q96IU4



Q96J01



# Q96KP4



# Q96L92



# Q96PU8



# Q96S44



Q99426



Q99436





# Q99439

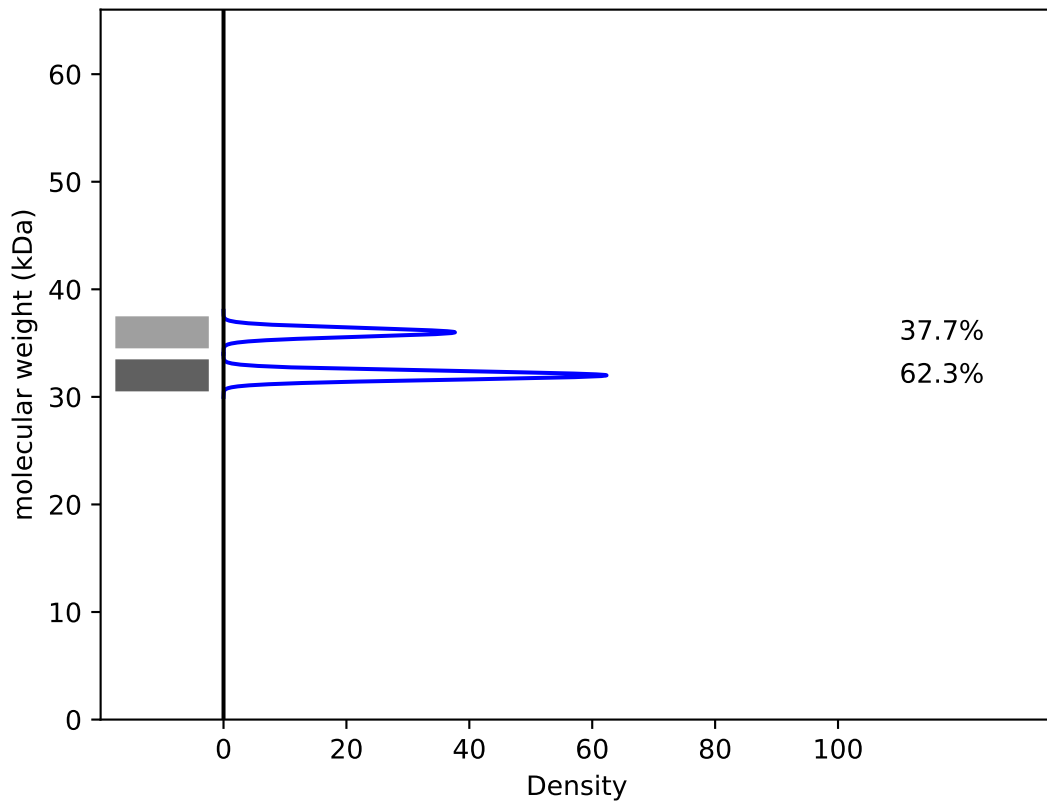

# Q15417

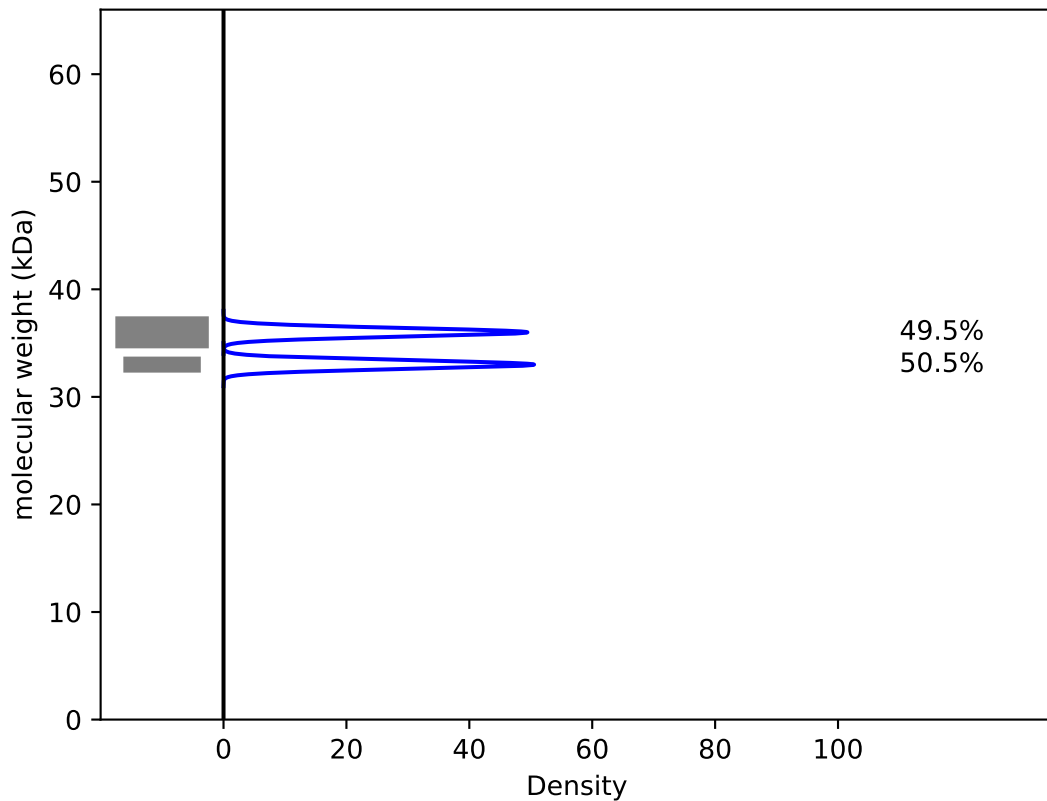

Q99497



Q99536



Q99598



# Q99615



# Q99623

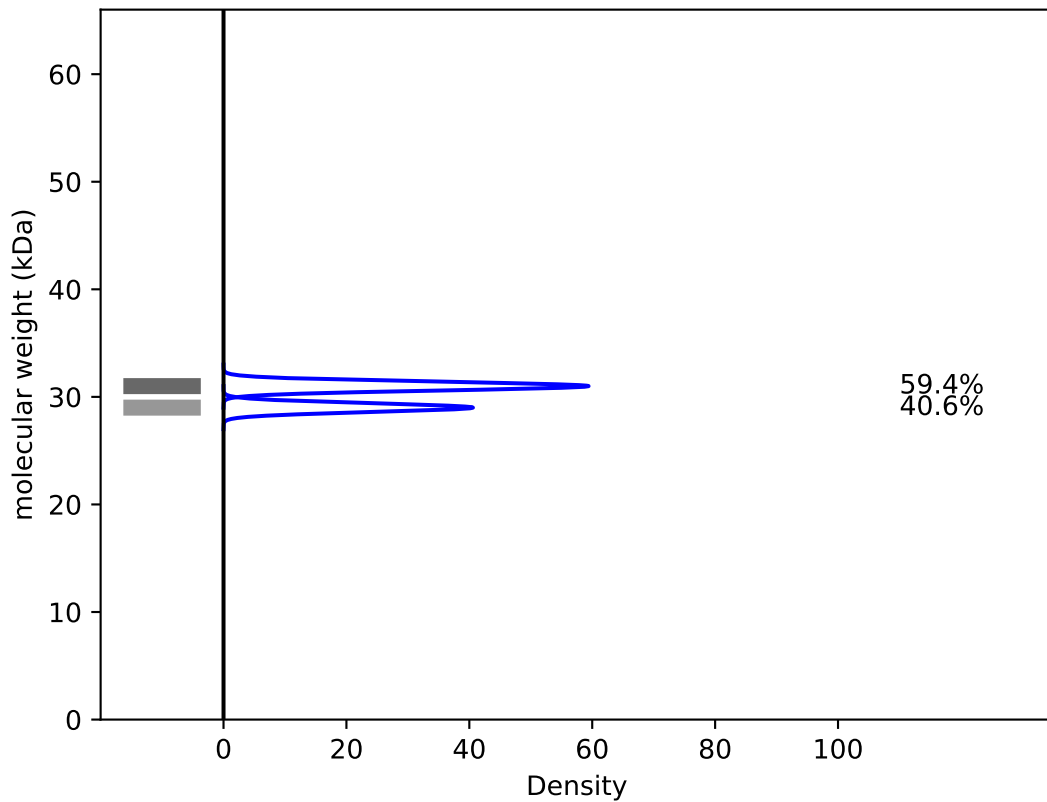

Q99627





Q99653



# Q99714

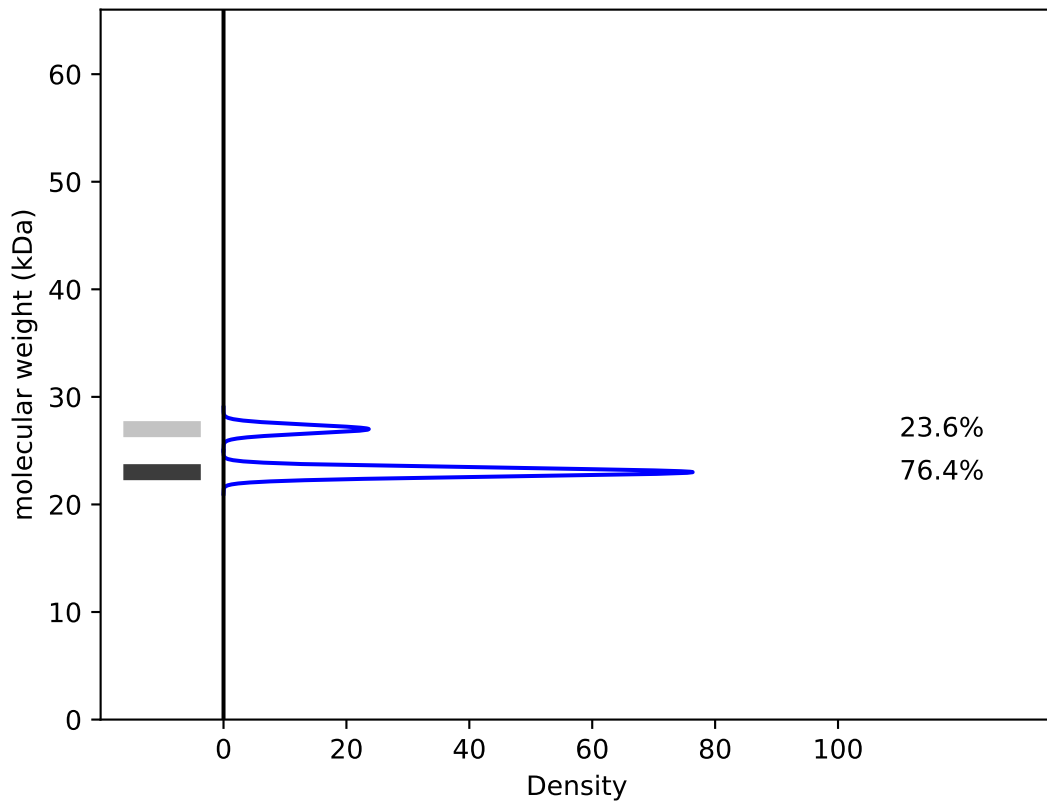

Q99720



# Q99729

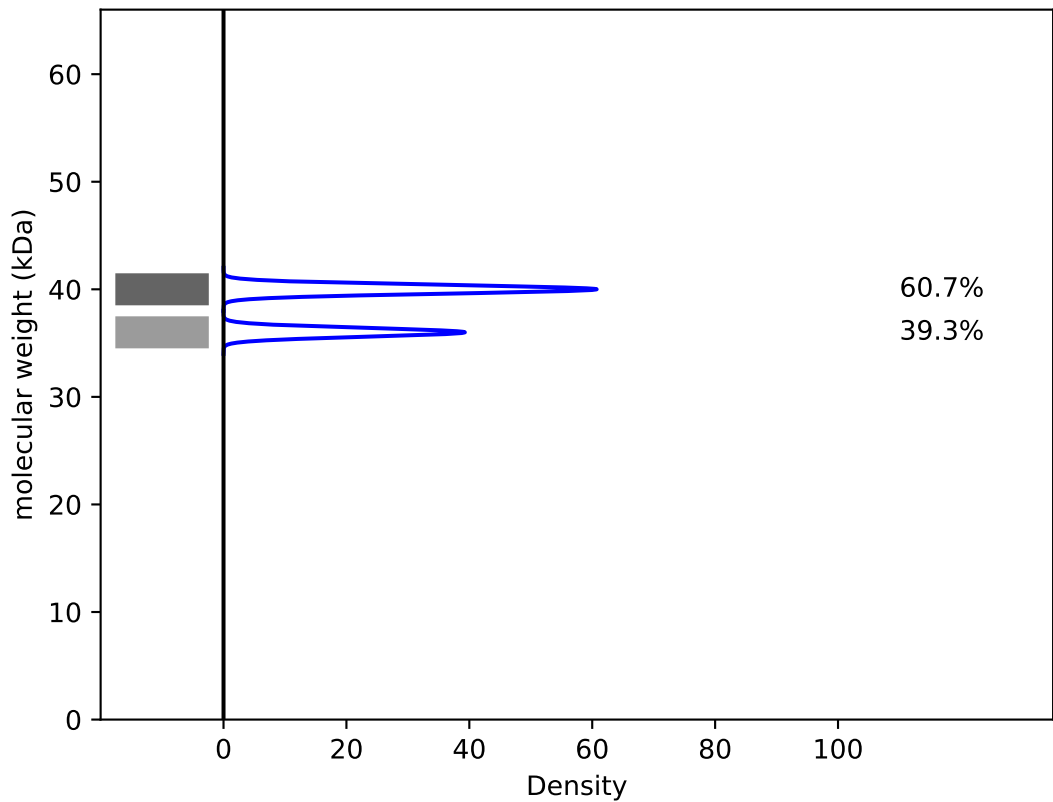

Q99829



# Q99832



Q99848



Q99873





# Q9NR22



# Q9BQA1

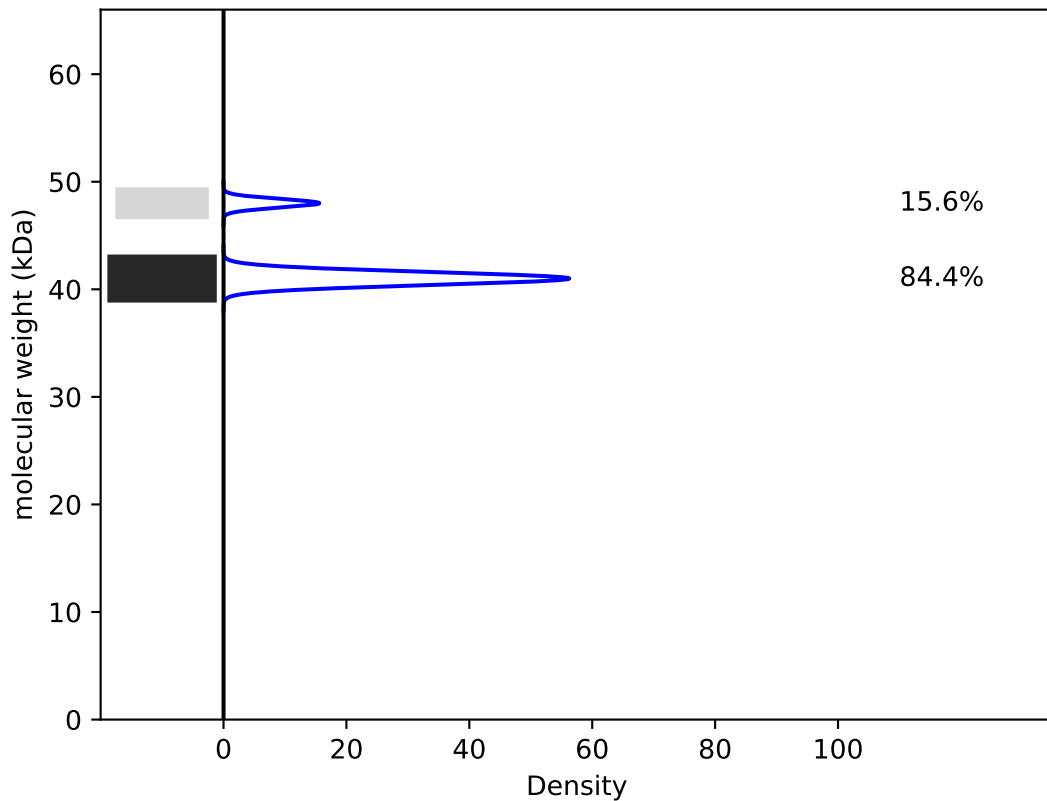

# Q9BQE3

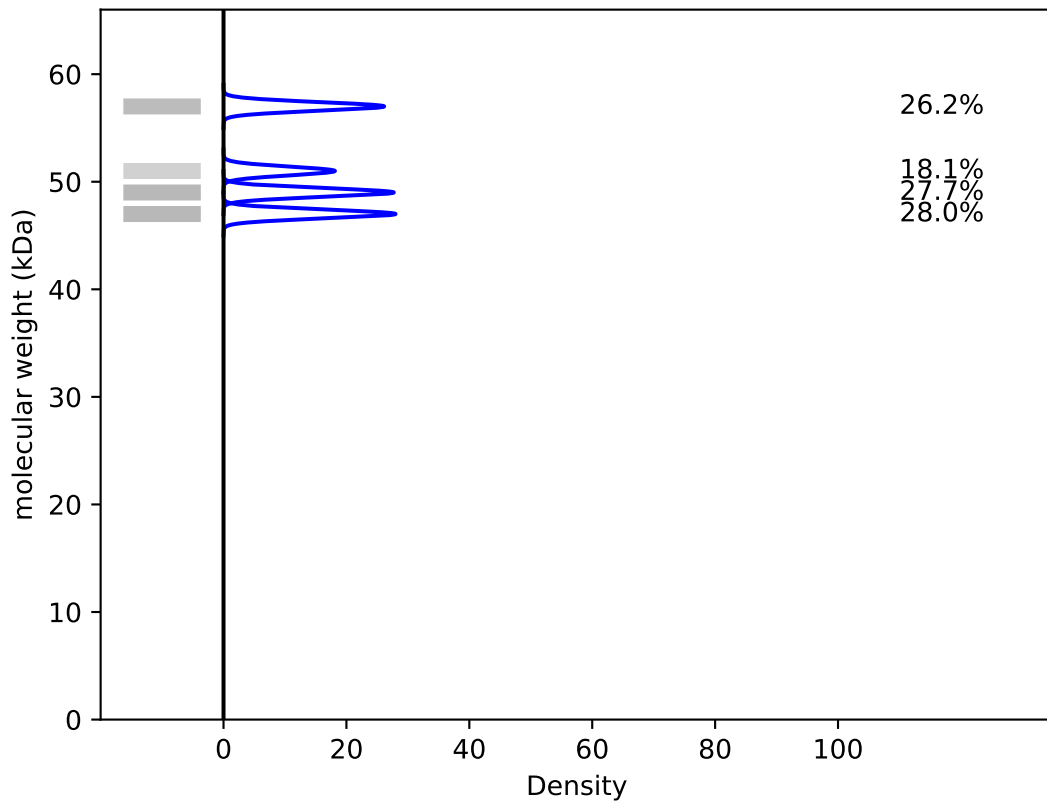

# Q9BRJ6



# Q9BRJ7



# Q9BRP4



# Q9BRQ8



# Q9BRX5





# Q9BRX8



# Q9BSD7

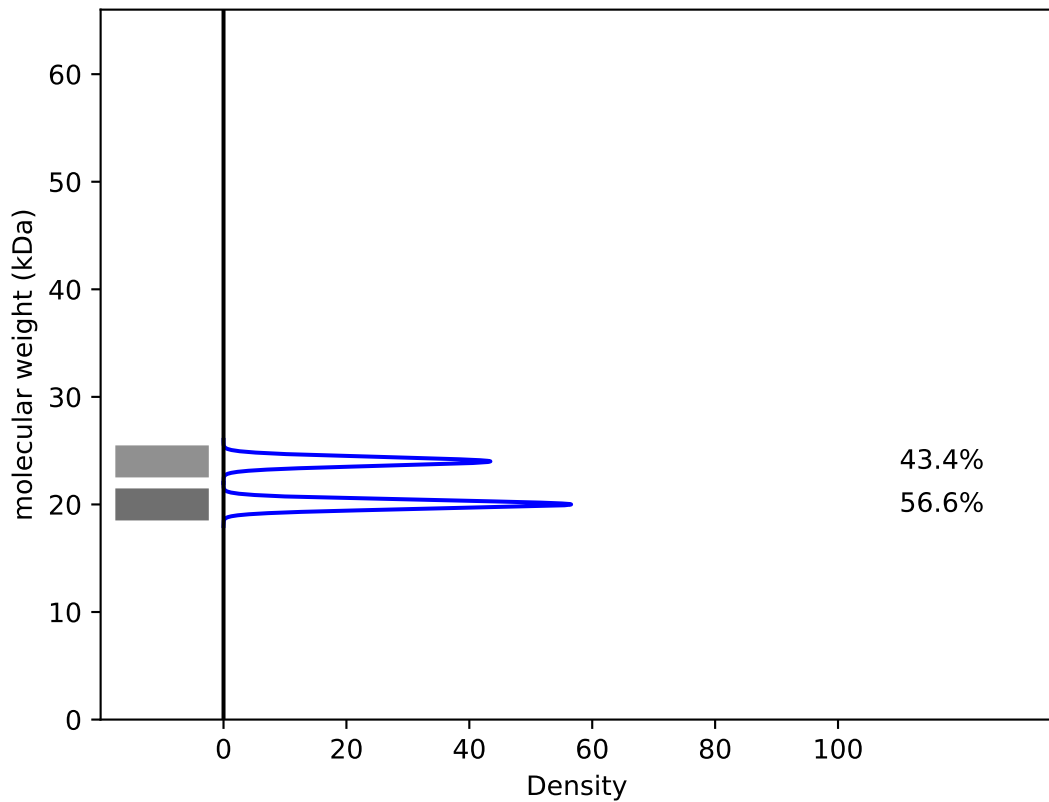

# Q9BSH4



# Q9BSV6



# Q9BTE7

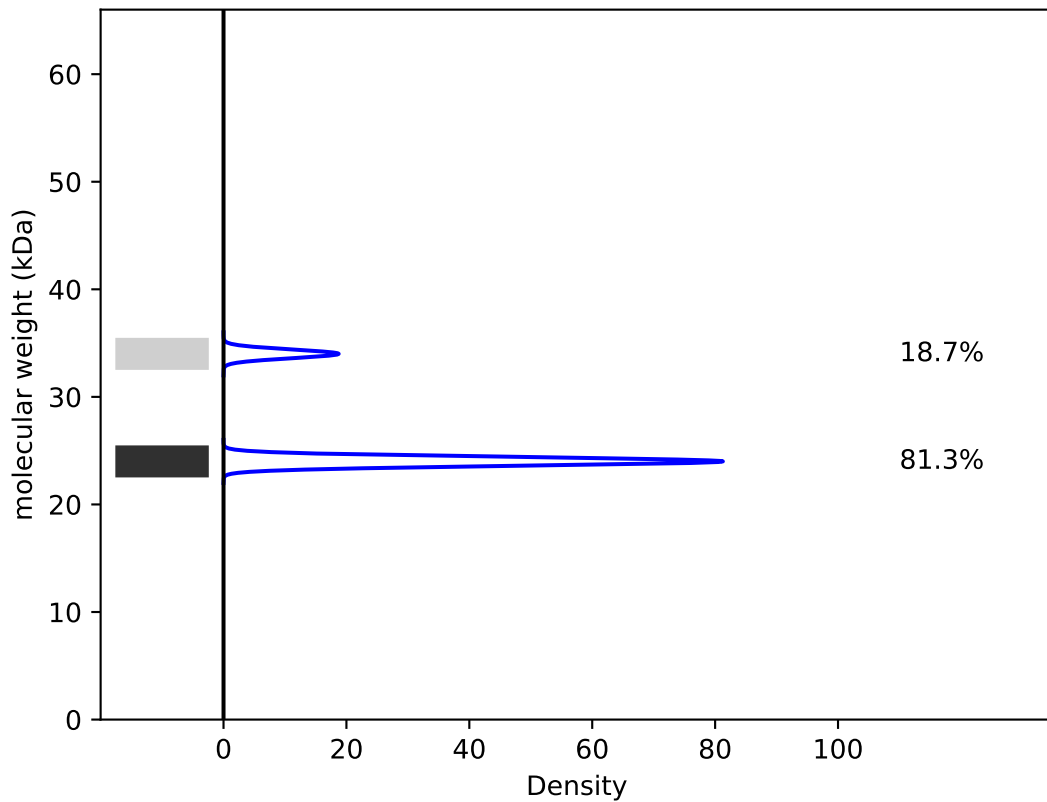

Q92564



# Q9BTT0

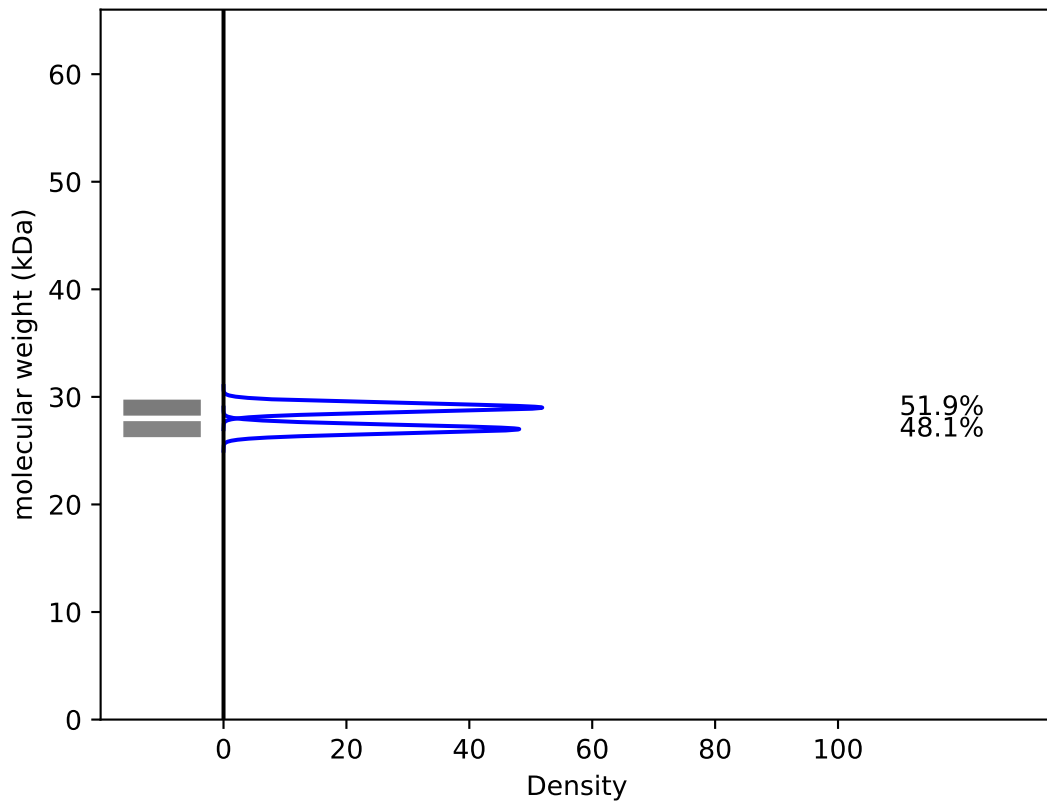

# Q9BTV4





# Q9BTZ2

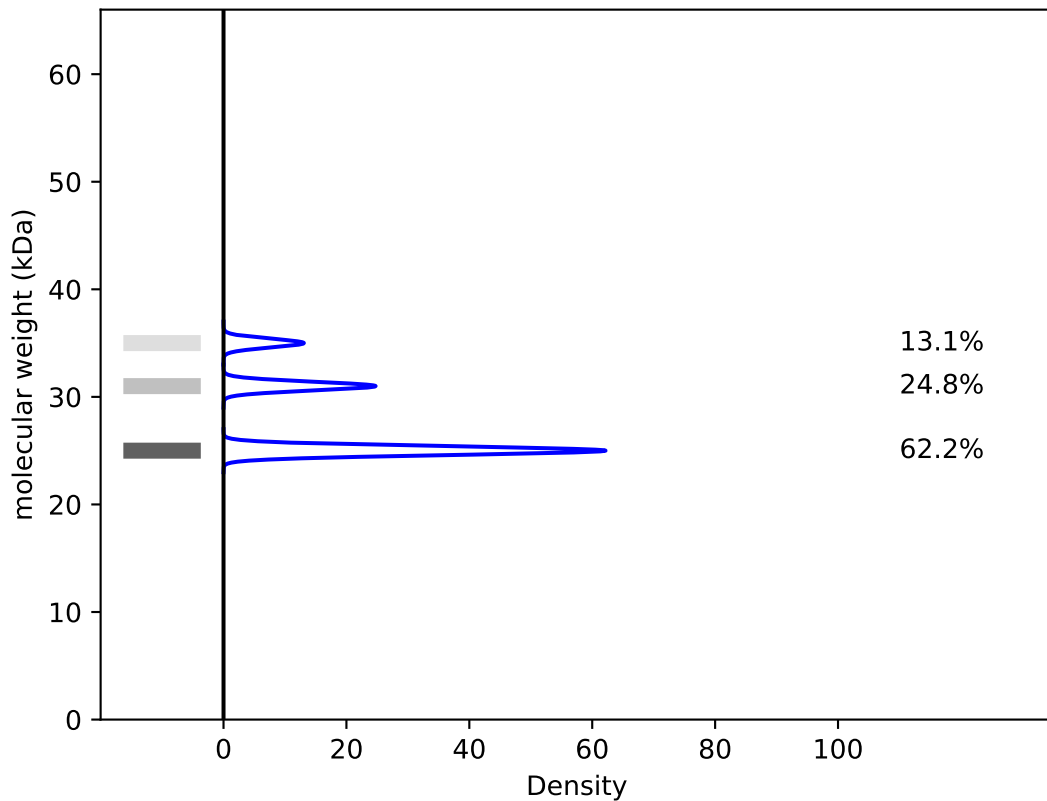

# Q9BUF5

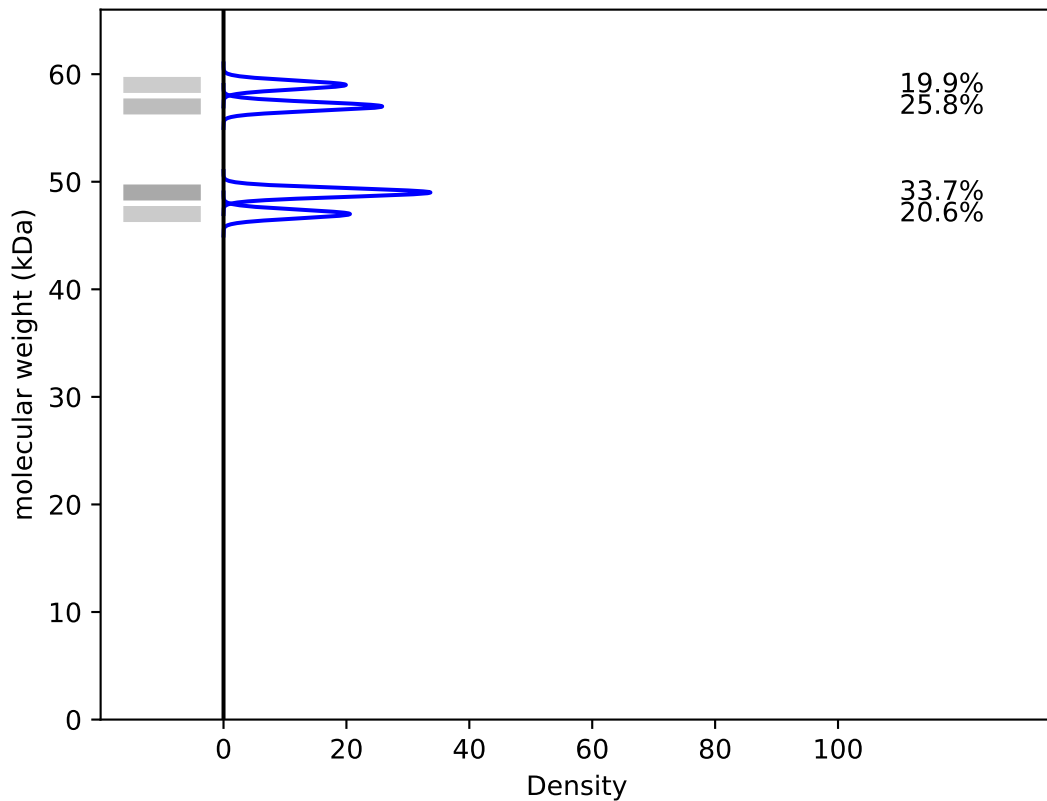

# Q9BUI4



# Q9BUL8



# Q9BUP3



# Q9BUT1



# Q9BV20

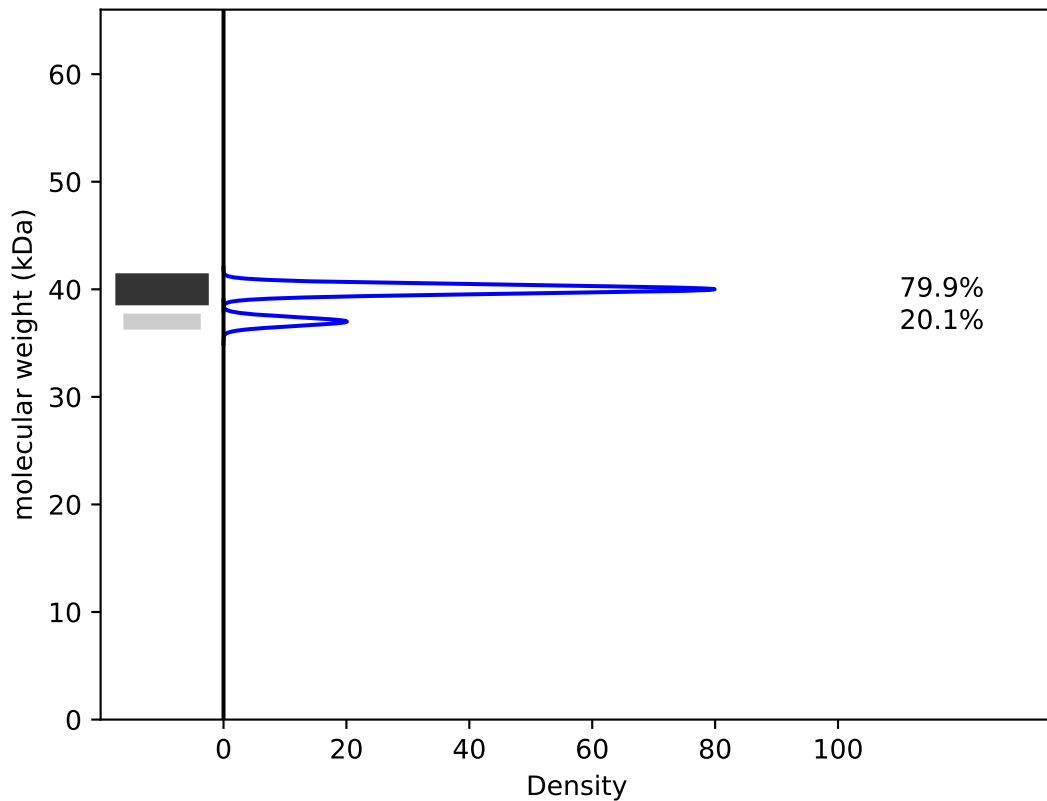

# Q9BV86





# Q9BVK6



# Q9BWD1

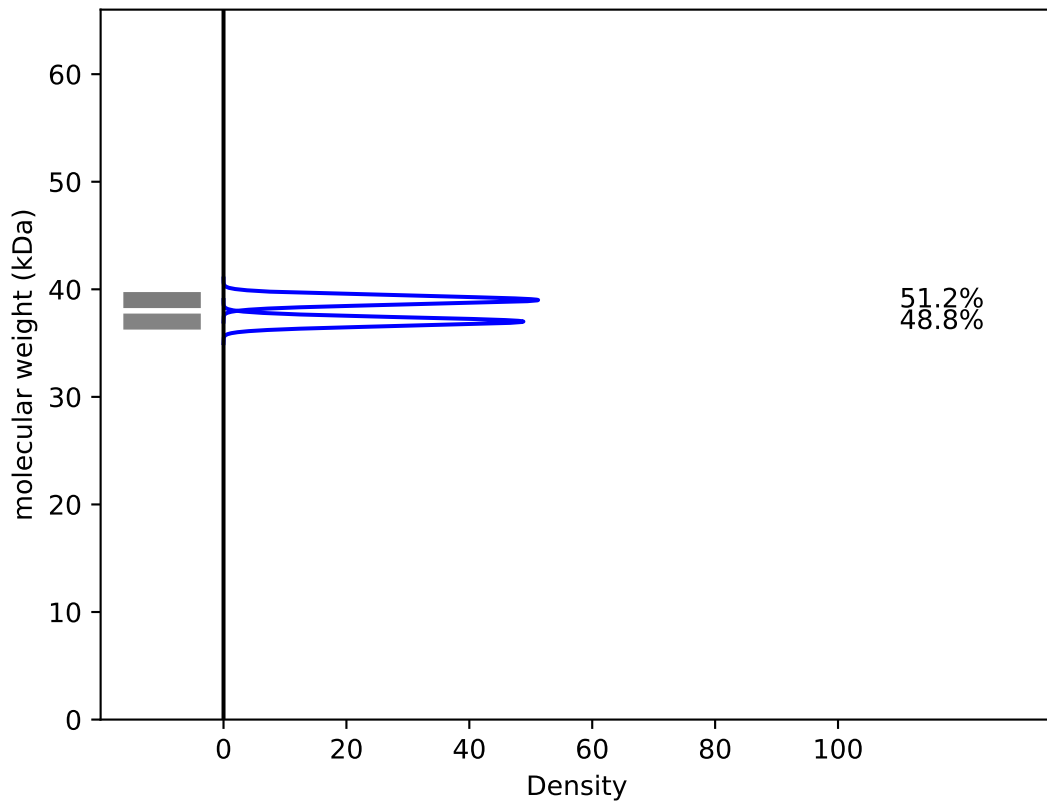

# Q9BWF3



# Q9BWM7

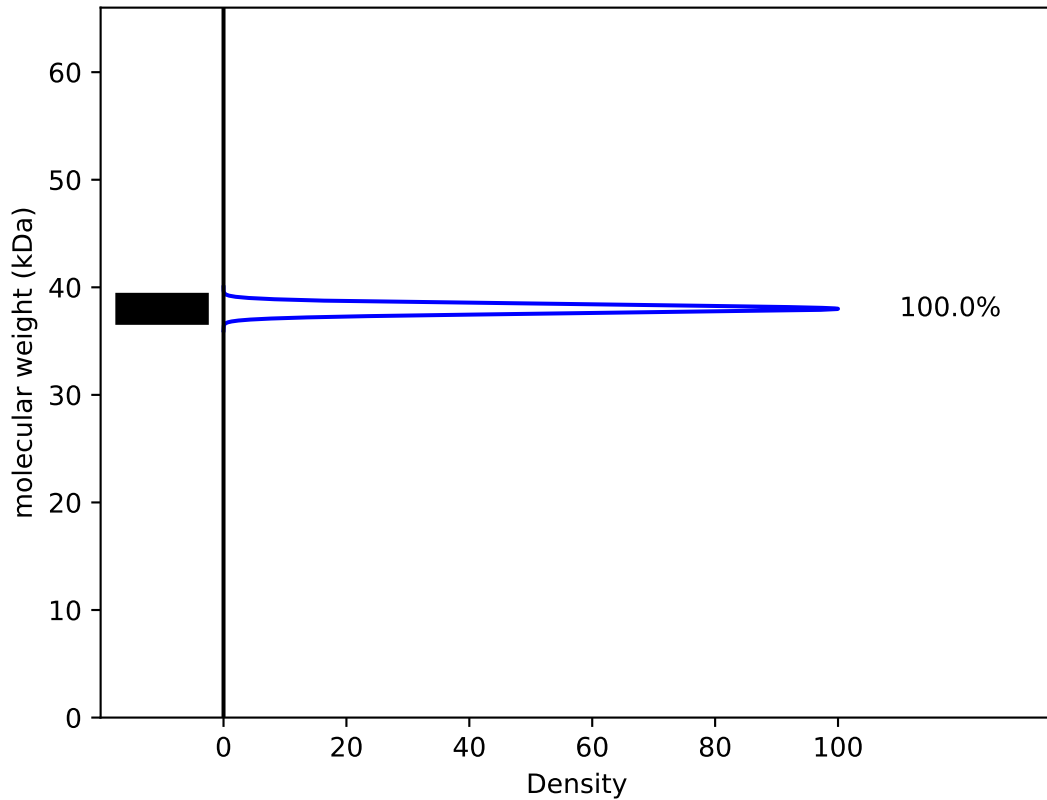

# Q9BXS5



Q9Y6Q5



# Q9BY32

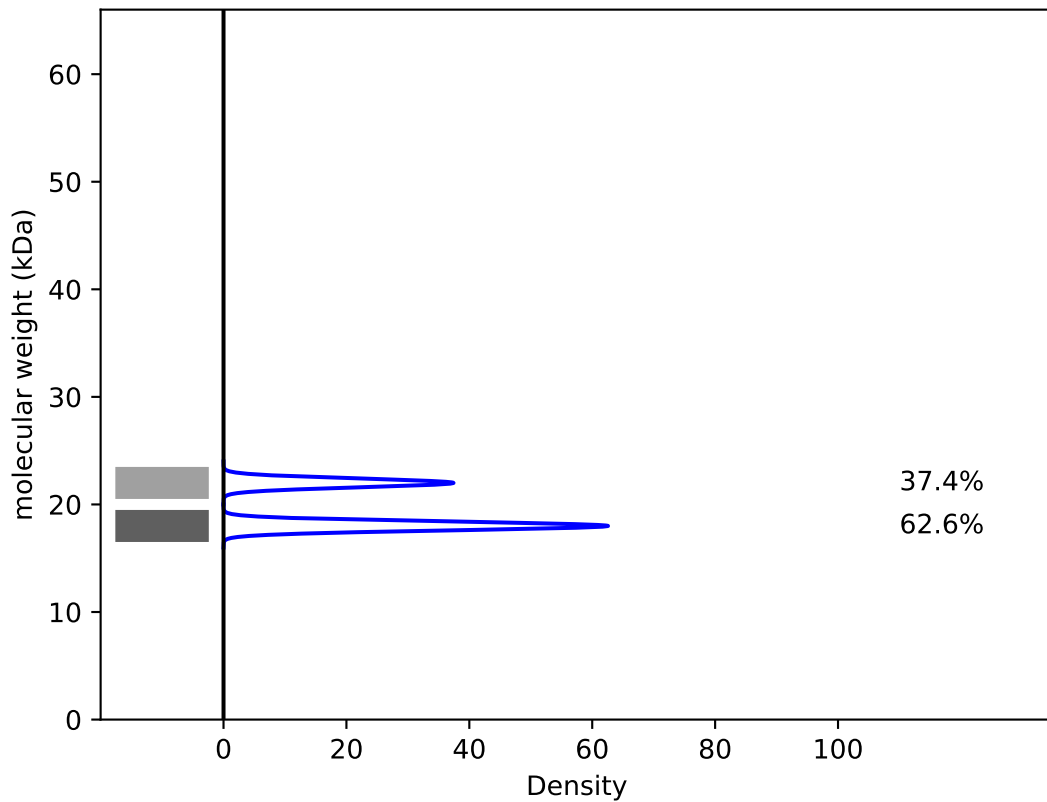

# Q9BYD1





# Q9BYD3

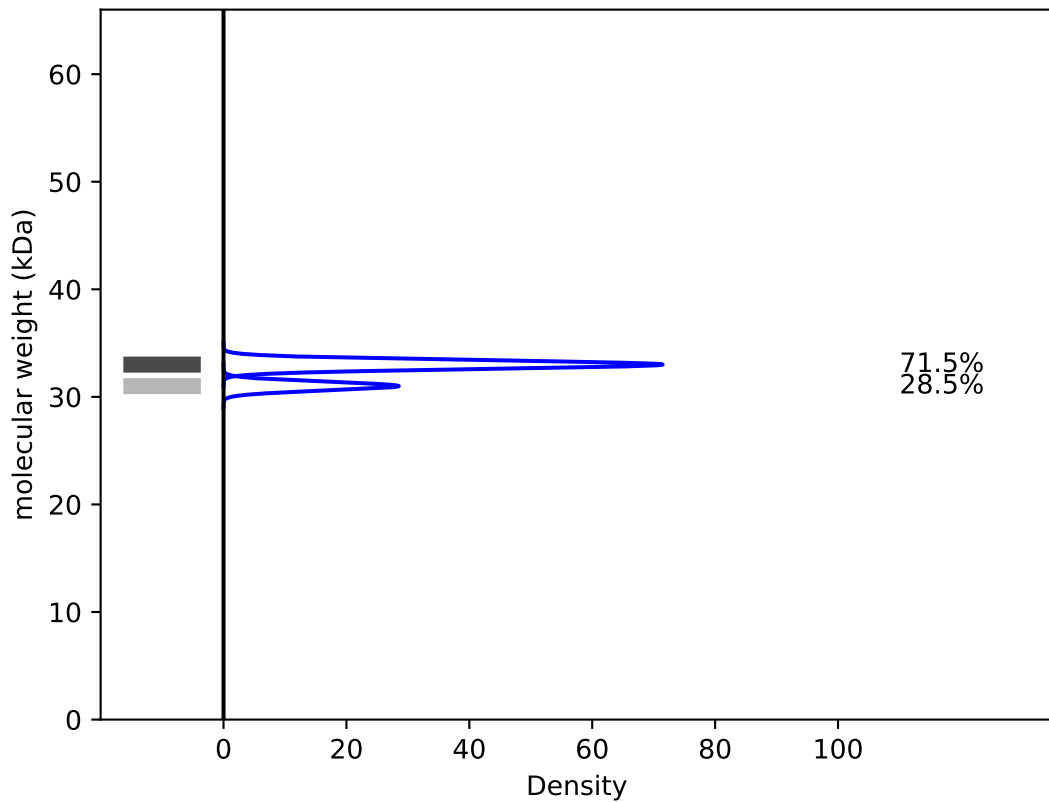

# Q9BYG3



# Q9BYN8



# Q9BZX2



# Q9BZZ5



# Q9GZS3



# Q9GZT8

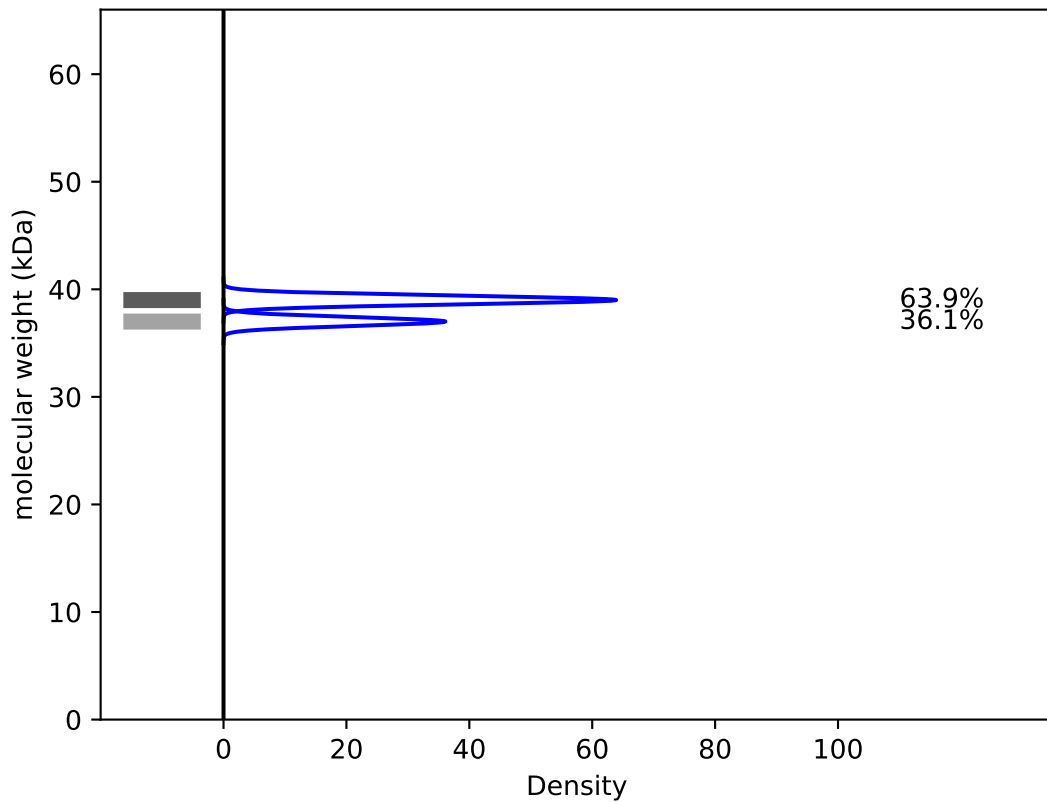

# Q9GZZ1

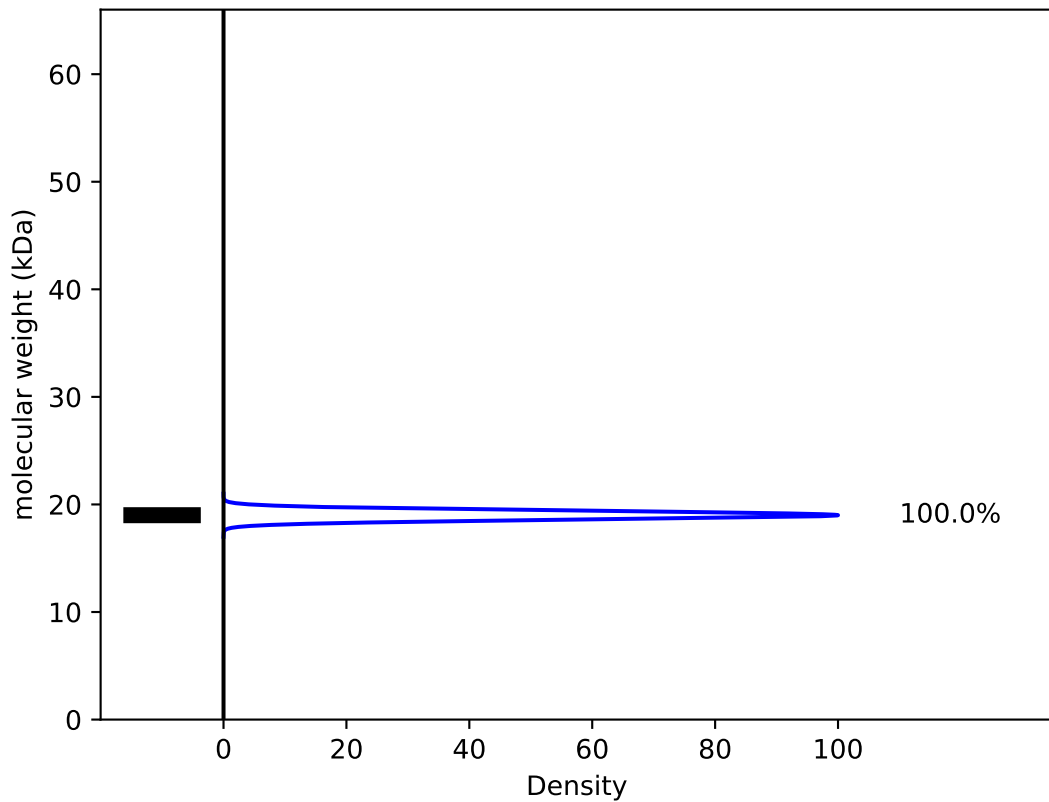



# Q9H061

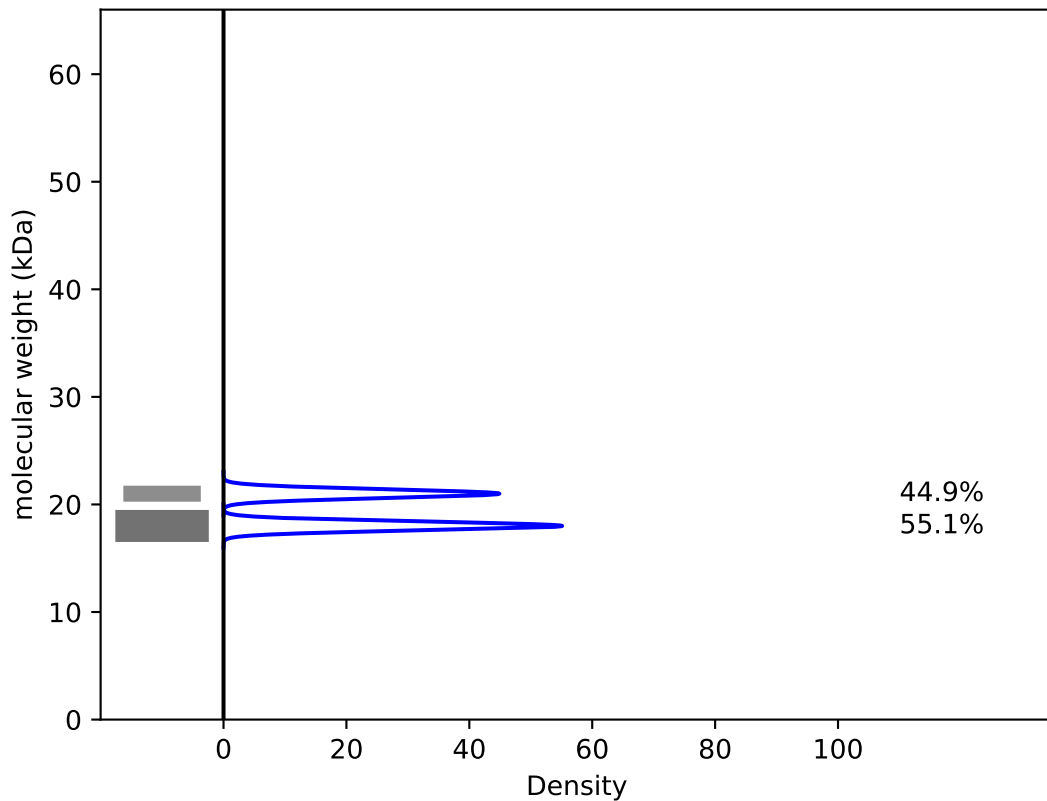

# Q9H074

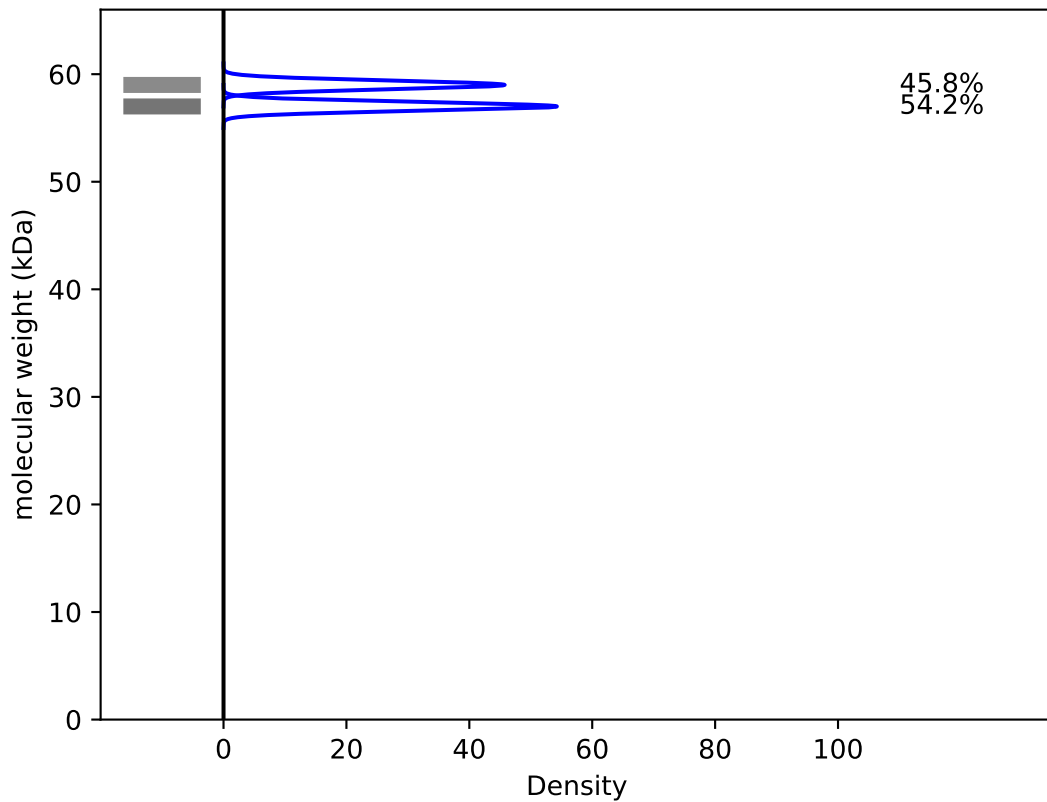

# Q9H0C8

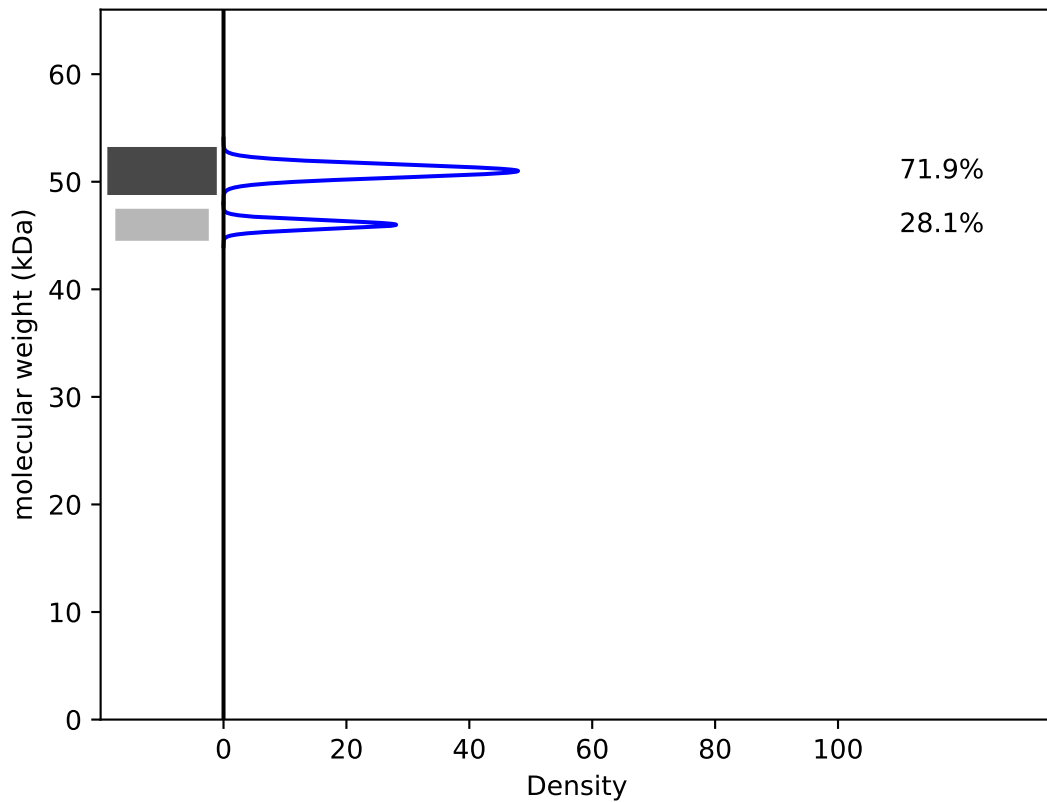

# Q9H0S4



# Q9H0U4



# Q92928



# Q9H0U6



# Q9H173

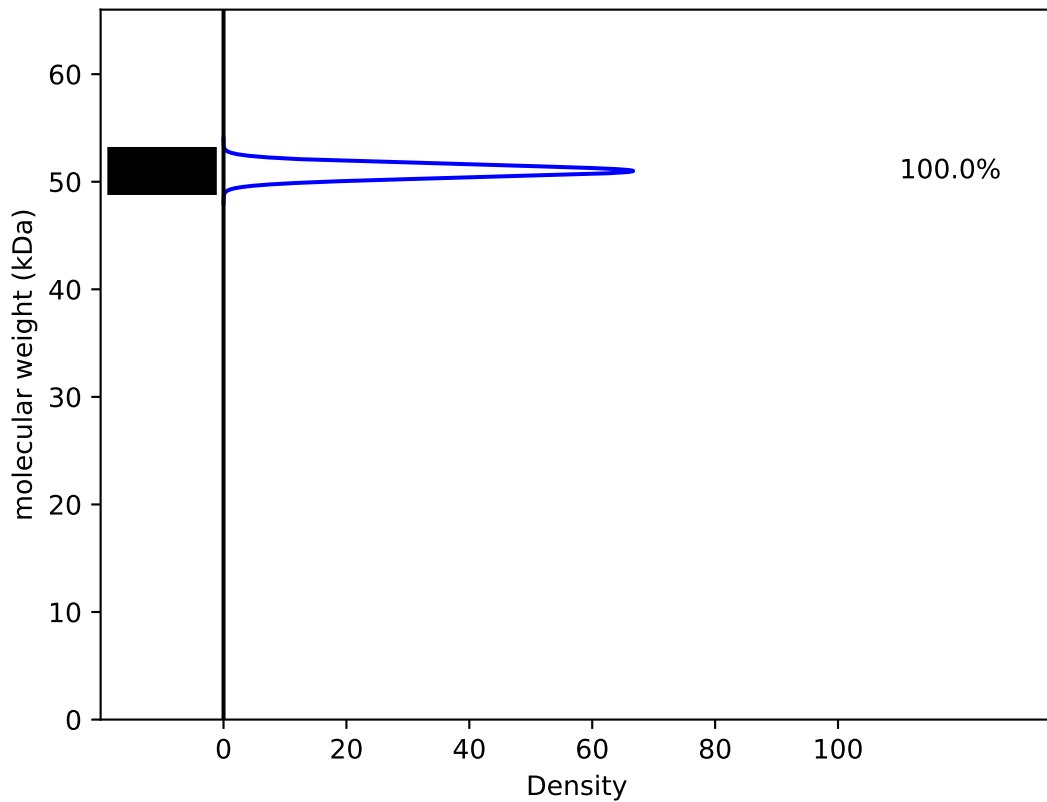



# Q9H2D1

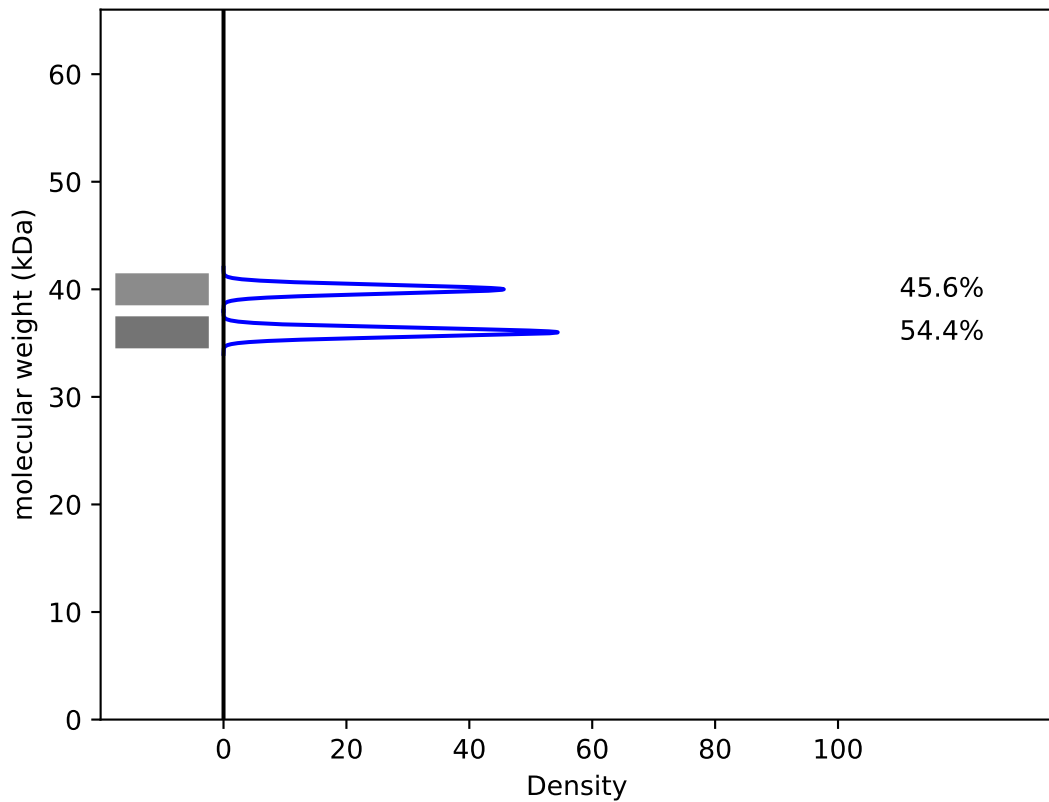

Q9H2P9



# Q9H2U2

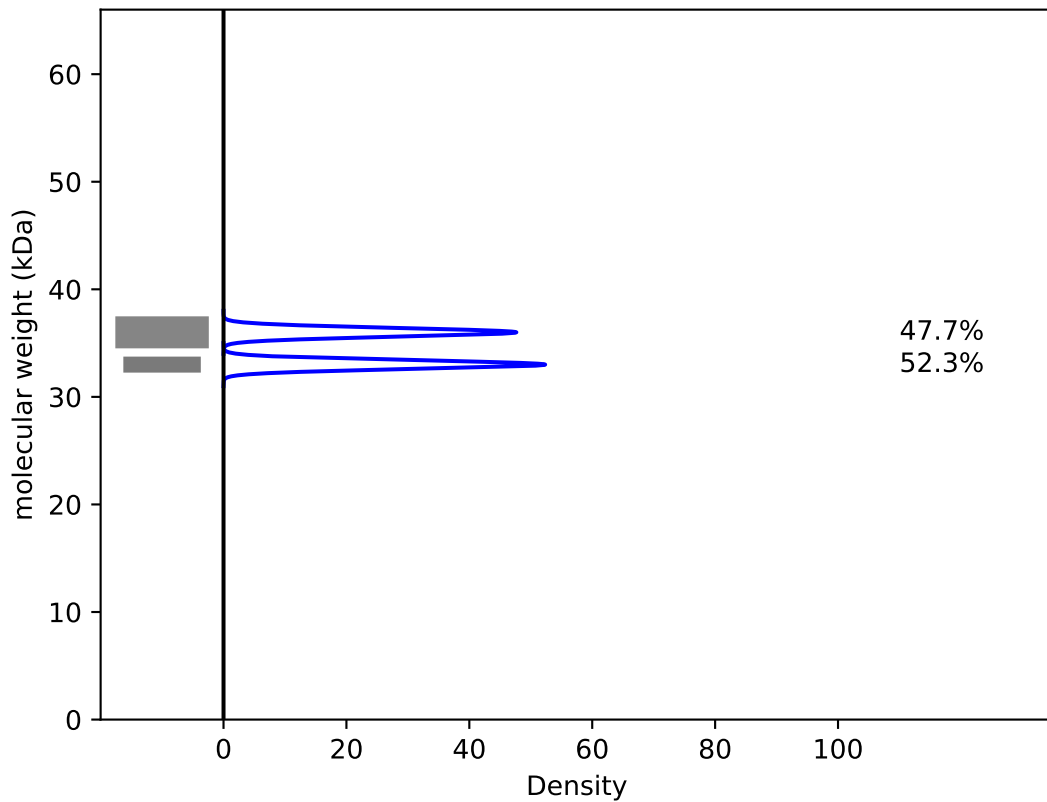

# Q9H2W6



# Q9H3N1

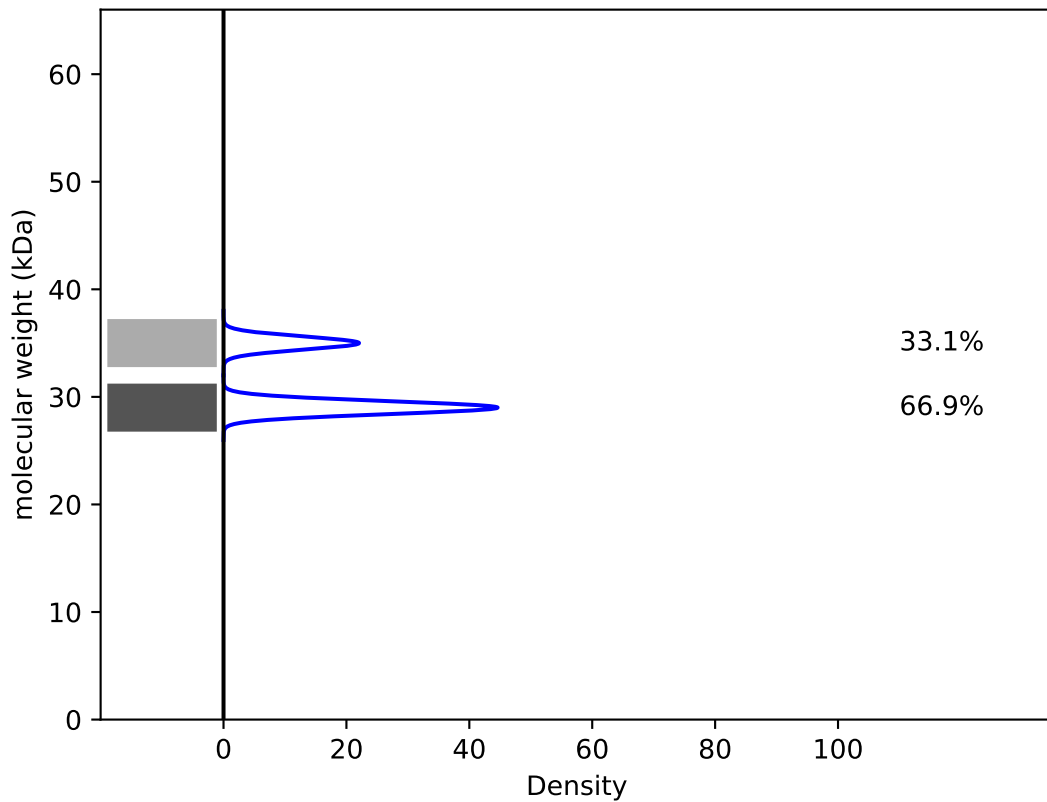

# Q9H488



# Q9H4A6

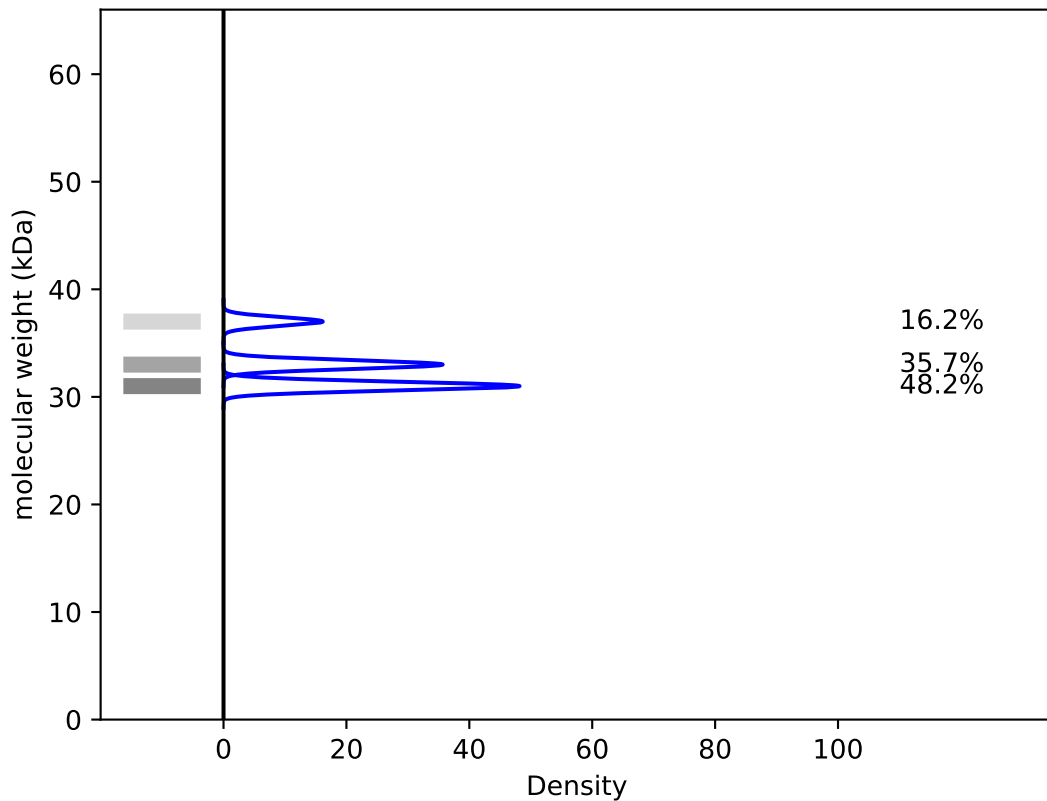

# Q9H4I3

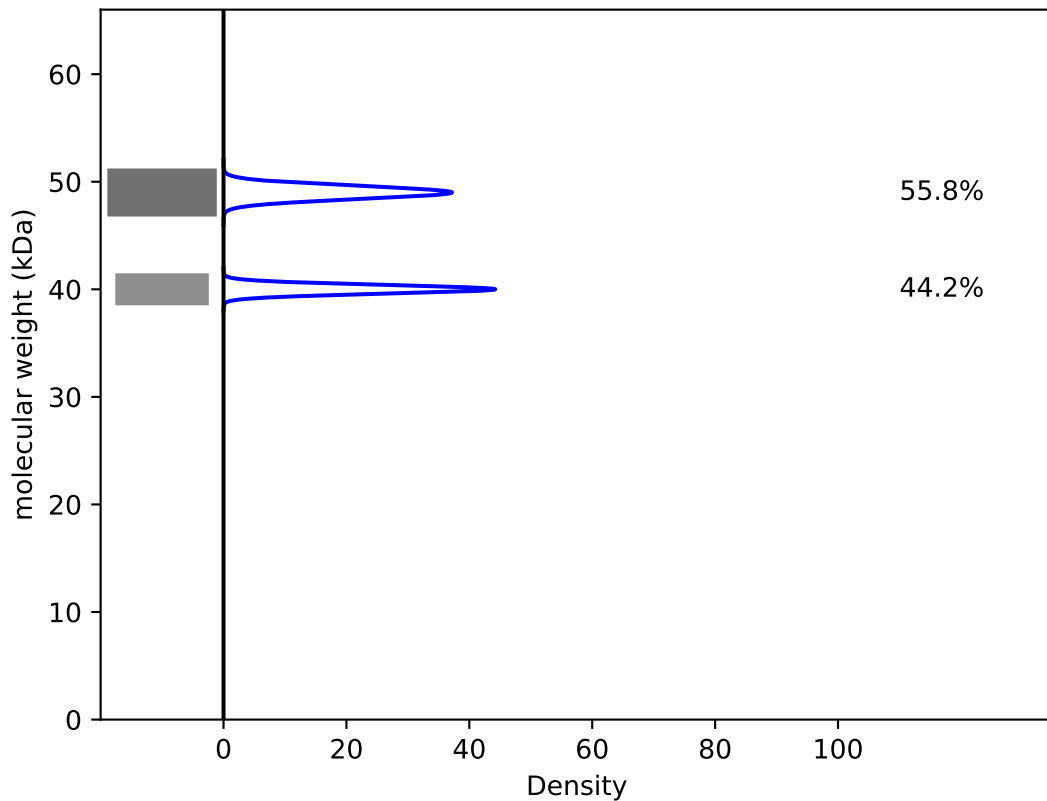



# Q9H7B2

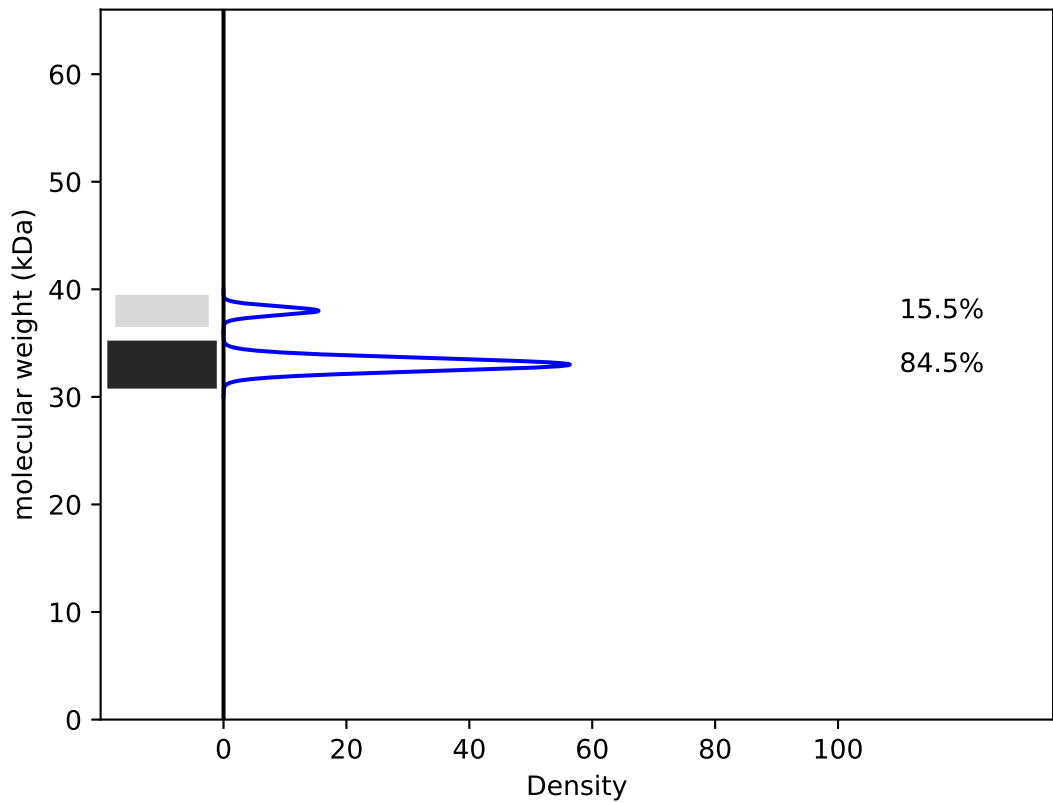

# Q9H832



# Q9H9B4

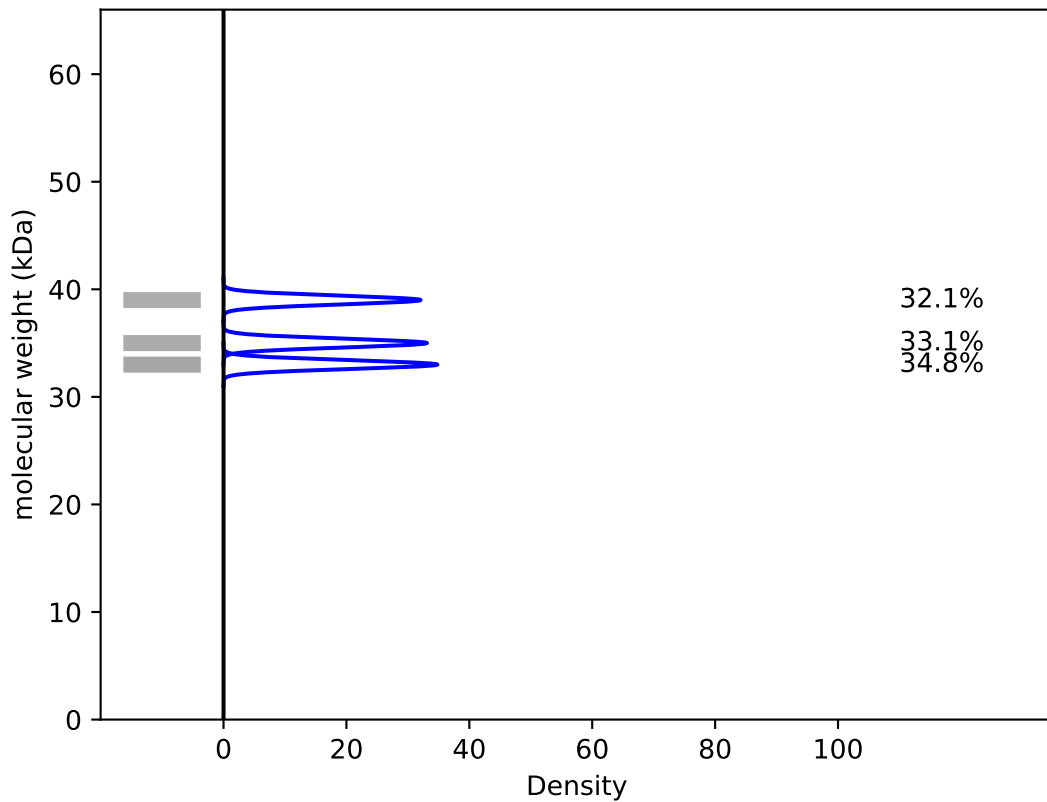

# Q9H9J2

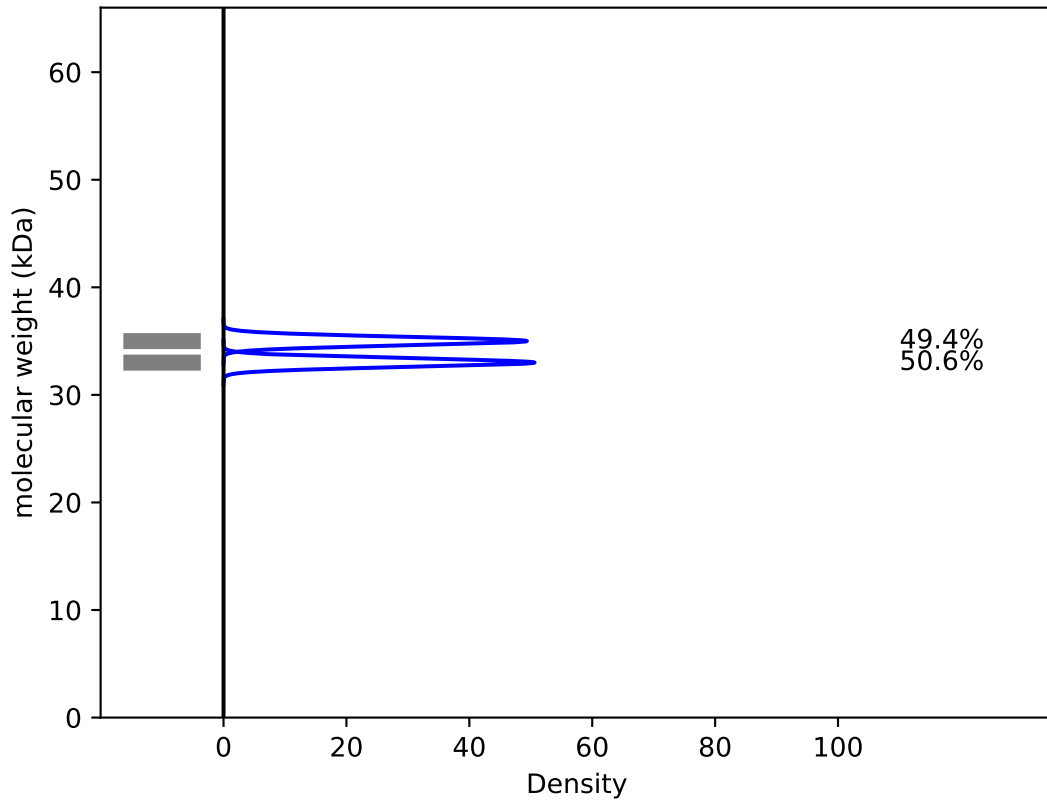

# Q9HAV7



# Q9HB07



# Q9HB71



# Q9HBM1





# Q9HC38



# Q9HCC0



# Q9HCN8



# Q9HD33



# Q9HDC9



# Q9NP72

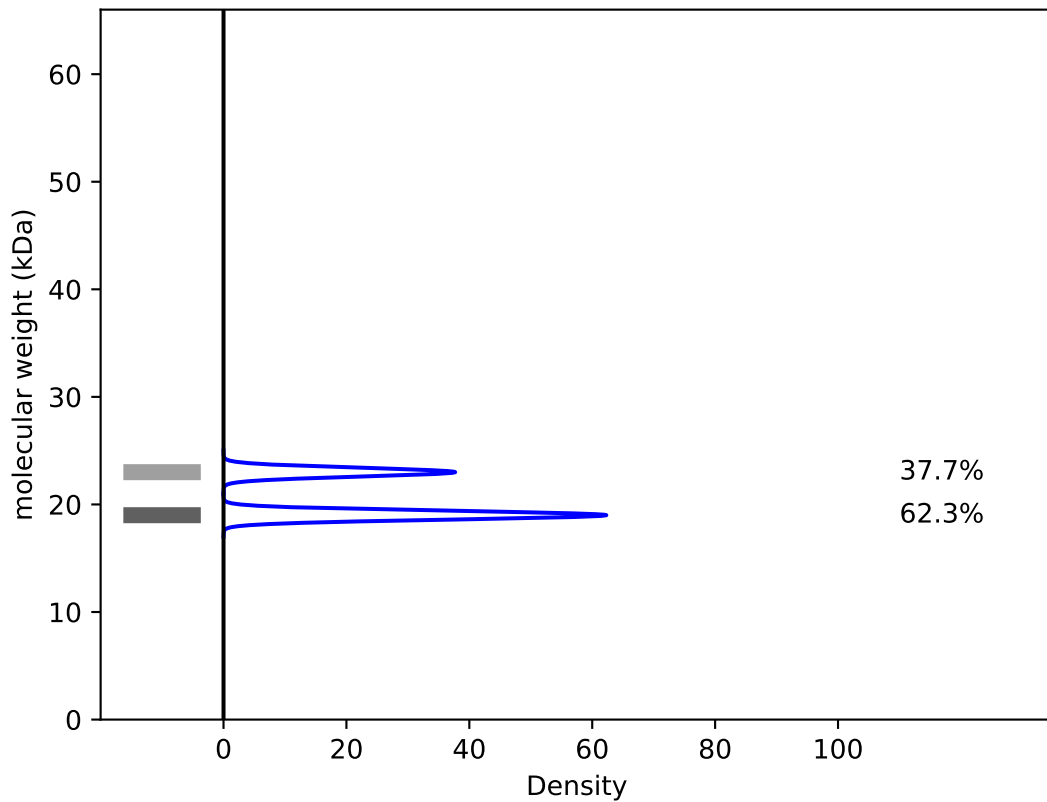

# Q9NP79



# Q9NPD3





# Q9NPD8



# Q9NPJ3



# Q9NQ88



# Q9NQG5



# Q9NQR4

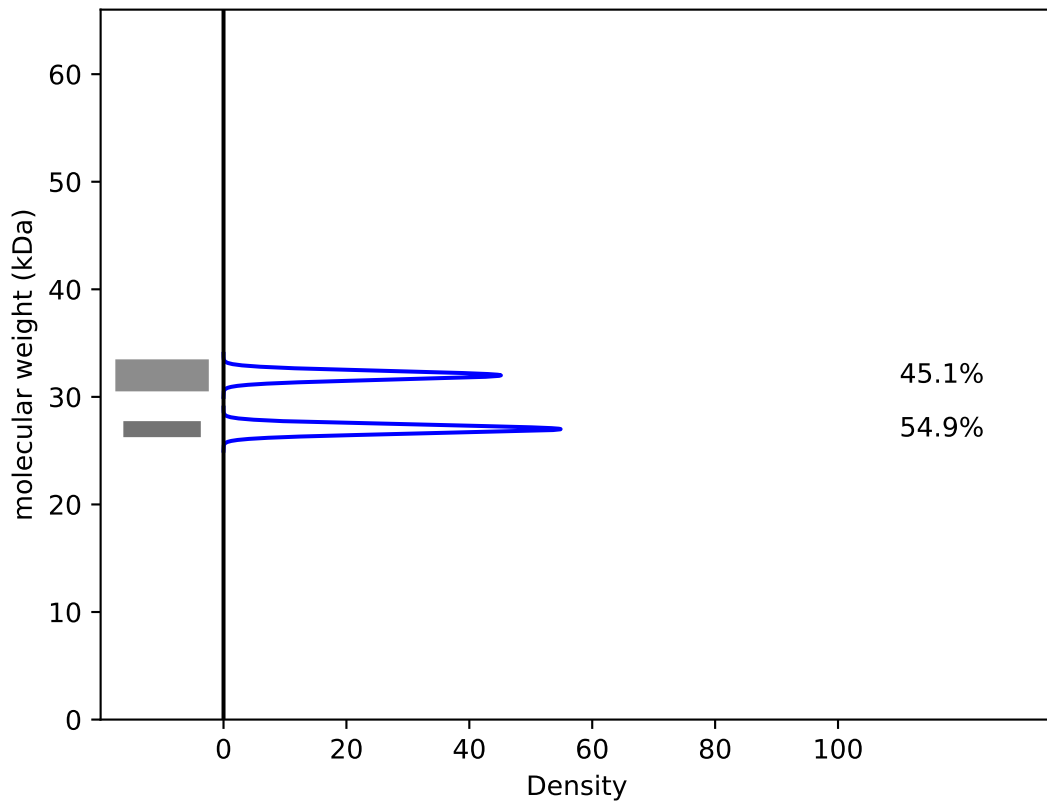

# Q9NR12

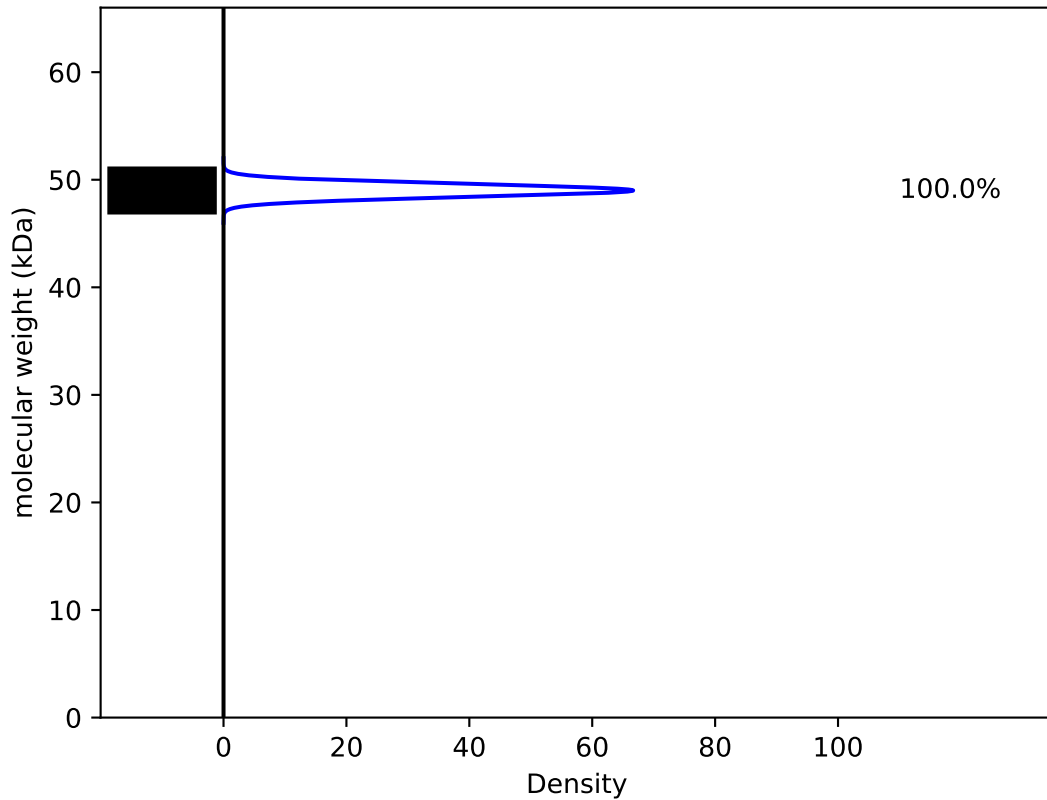

# Q9NR31



# Q9NR45

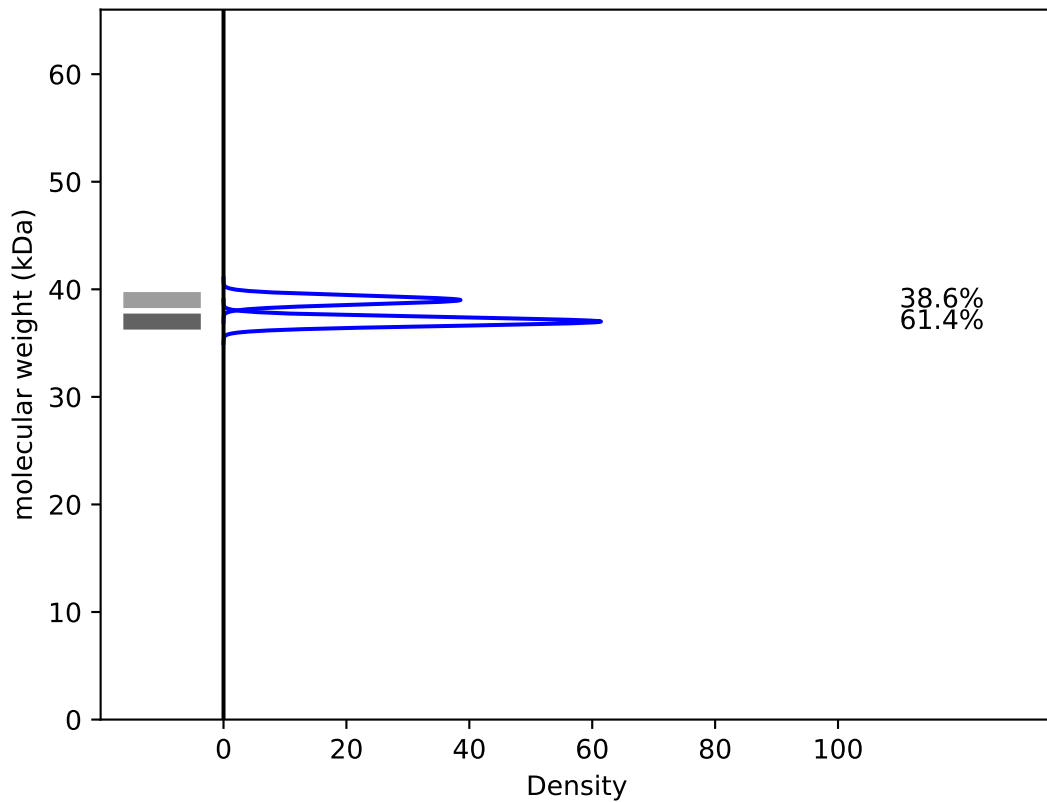



# Q9NR56



# Q5VZF2



# Q9NRN7

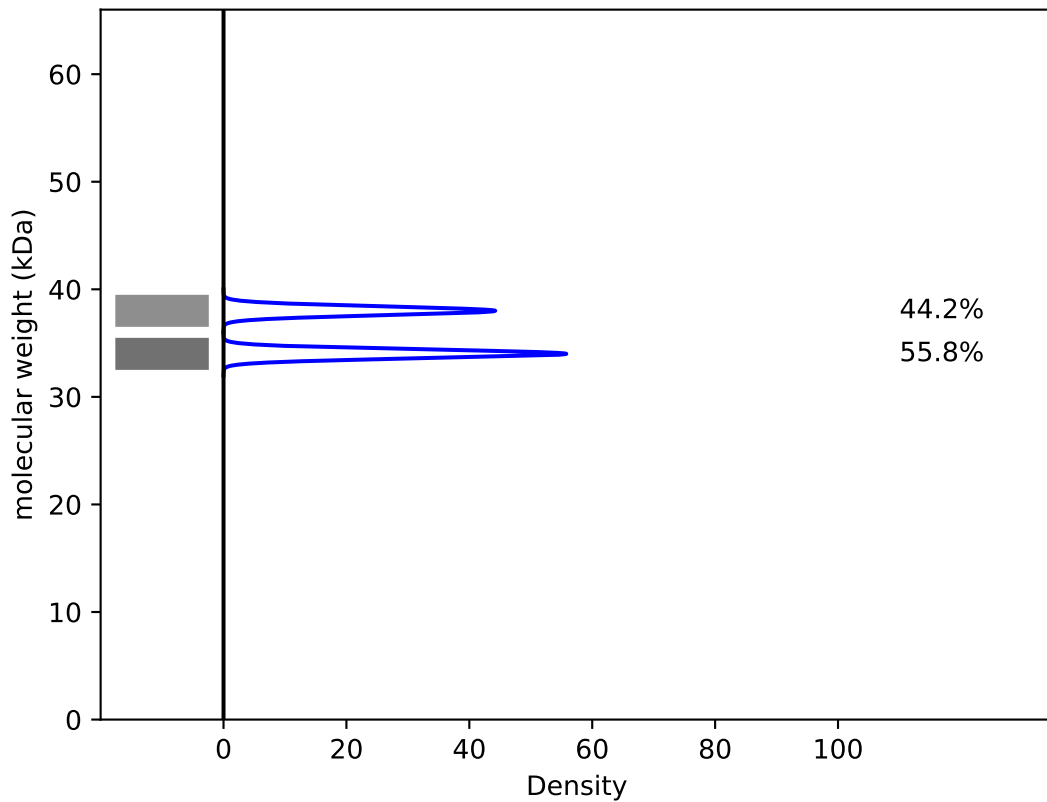

# Q9NRV9

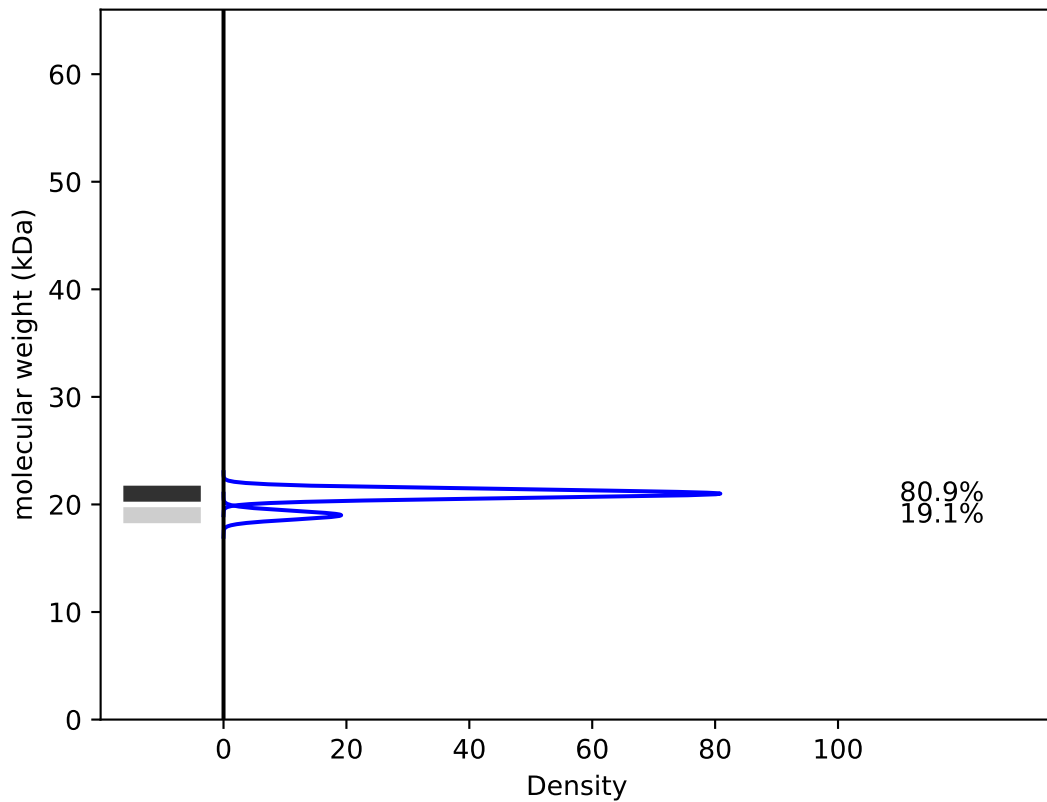

# Q9NRX1



# Q9NRX2



# Q9NS69



# Q9NT62





# Q9NTK5



# Q9NTX5



# Q9NUQ9

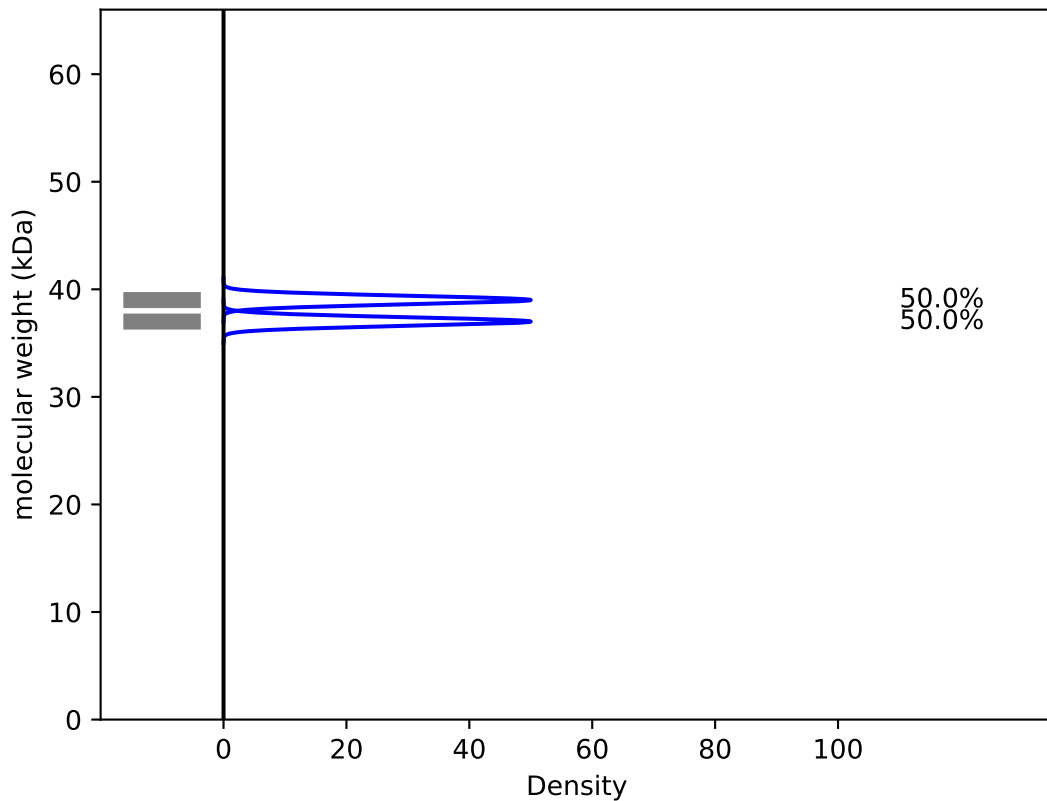

# Q9H0Q0

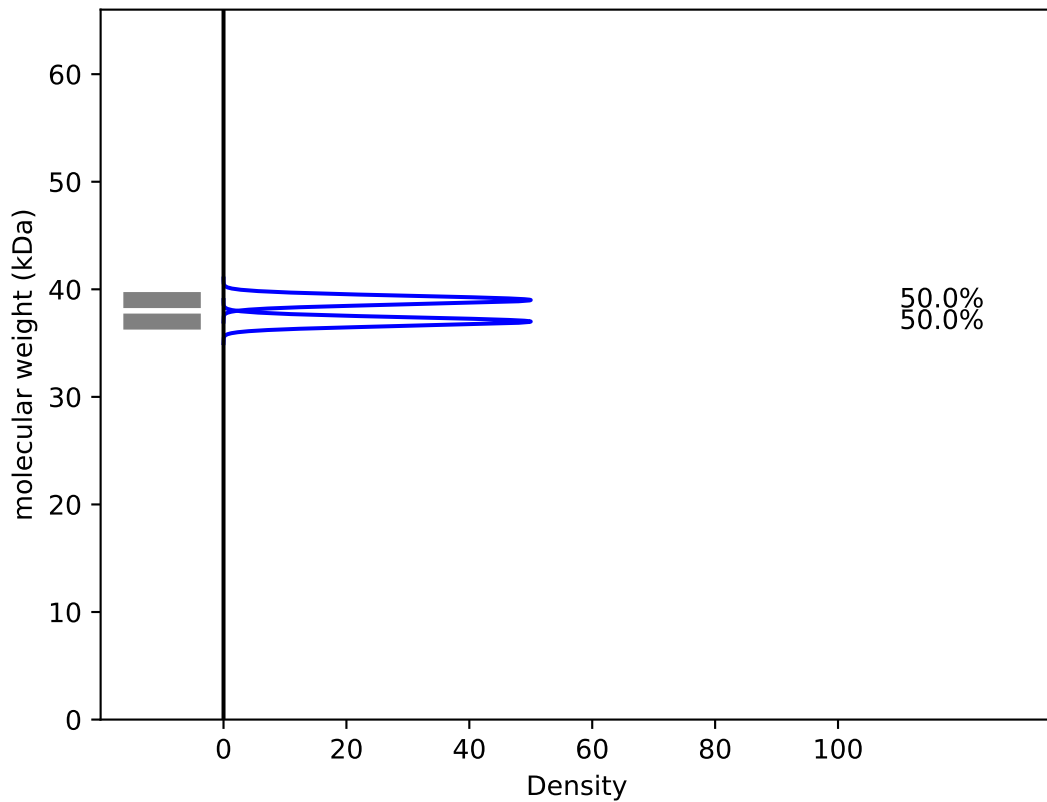

# Q9NUU7

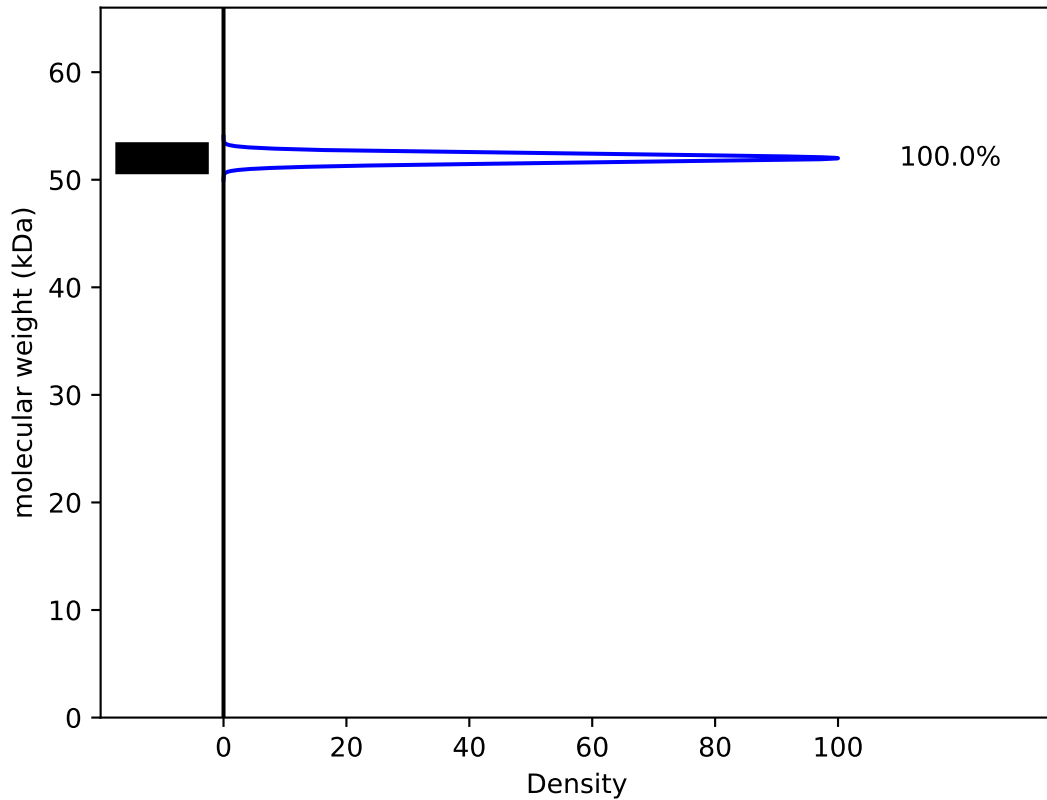

# Q9UMR2

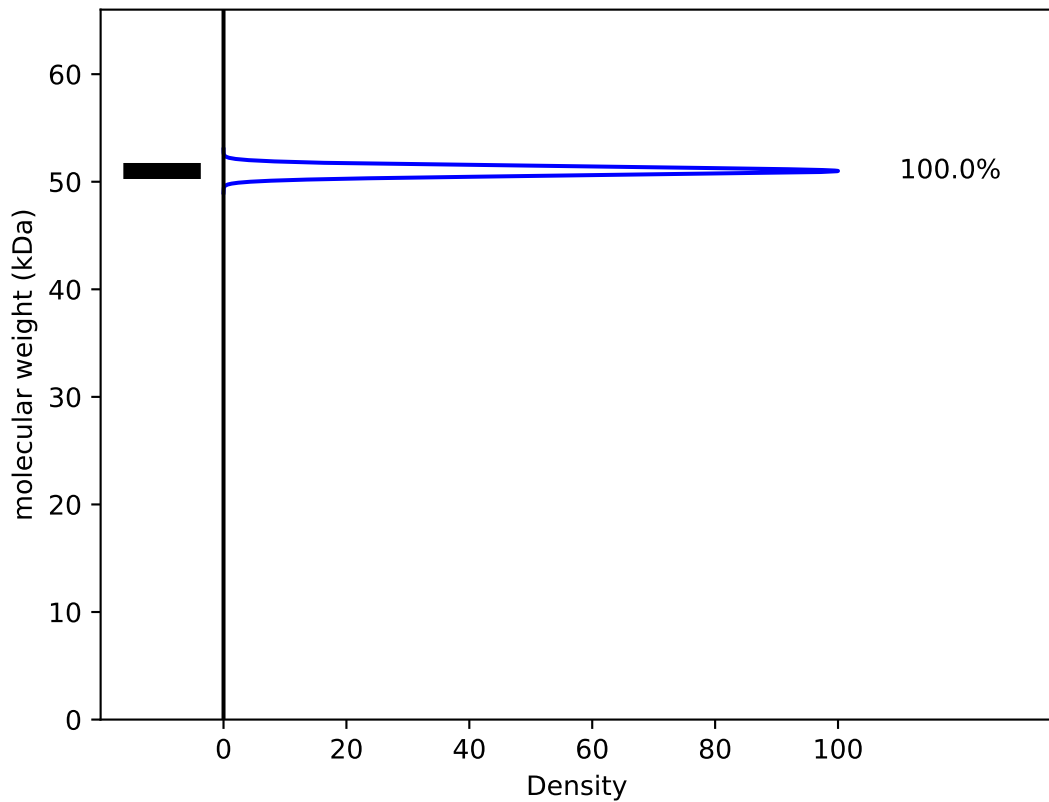

# Q9NV31



# Q9NVA2





# Q14141

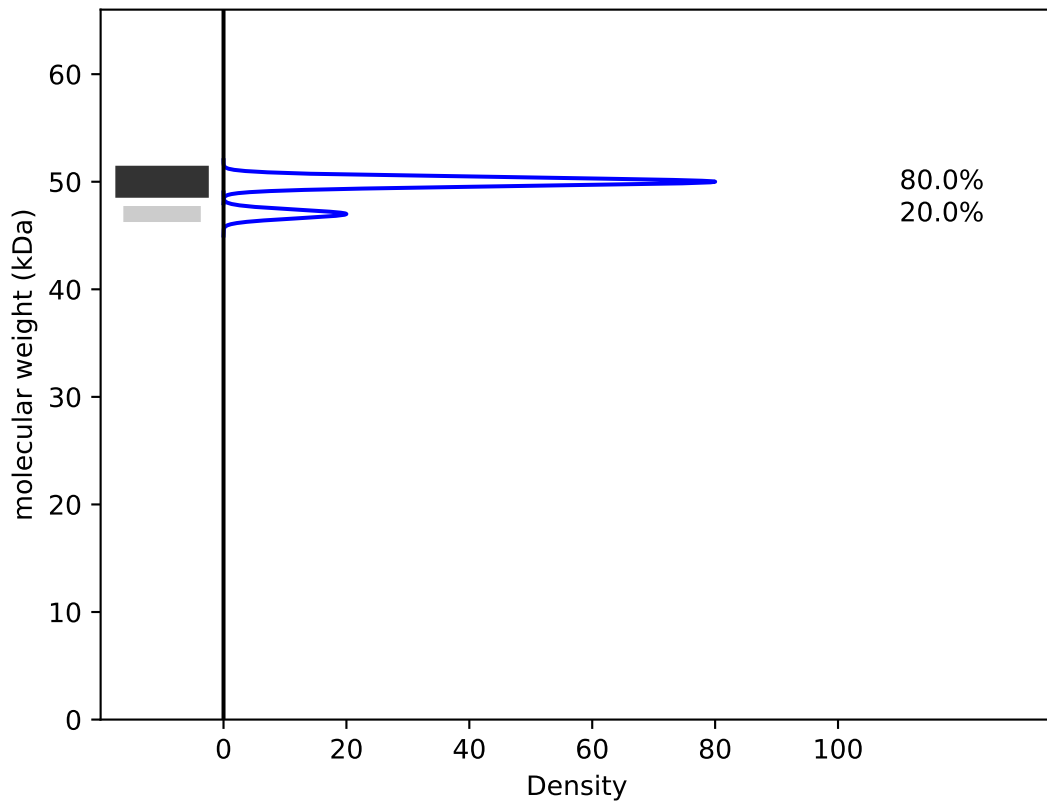

# Q9NVD7



# Q9HBI1



# Q9NVJ2

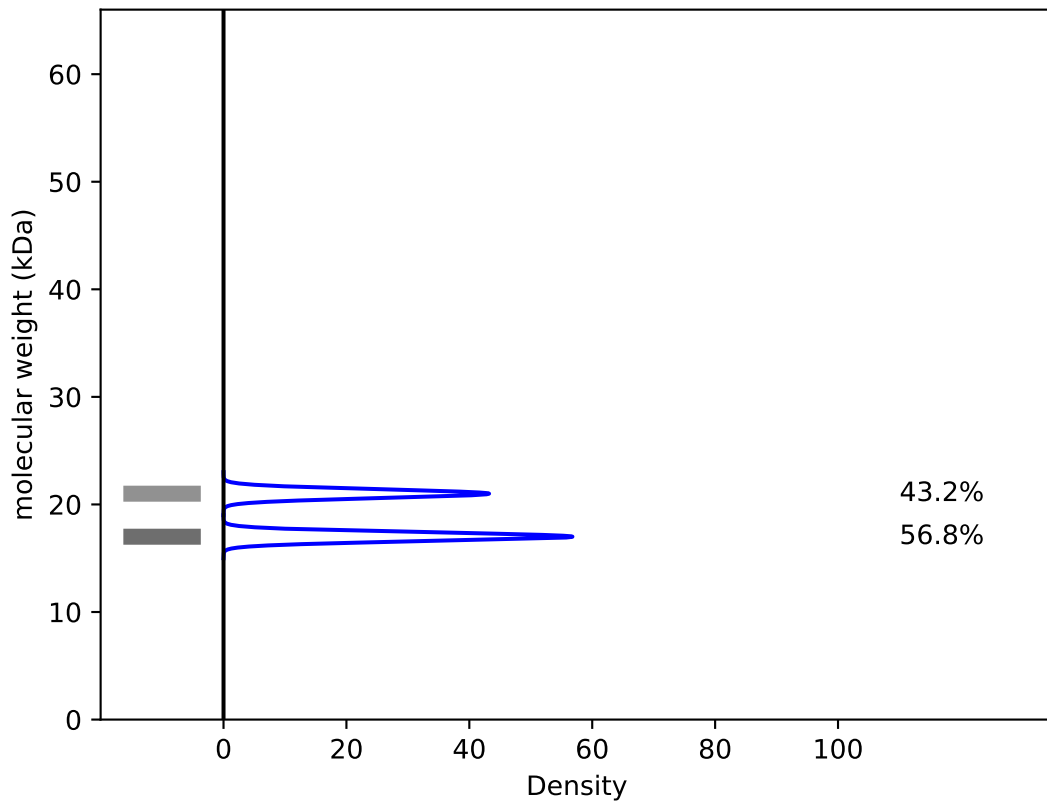

# Q9NWS0

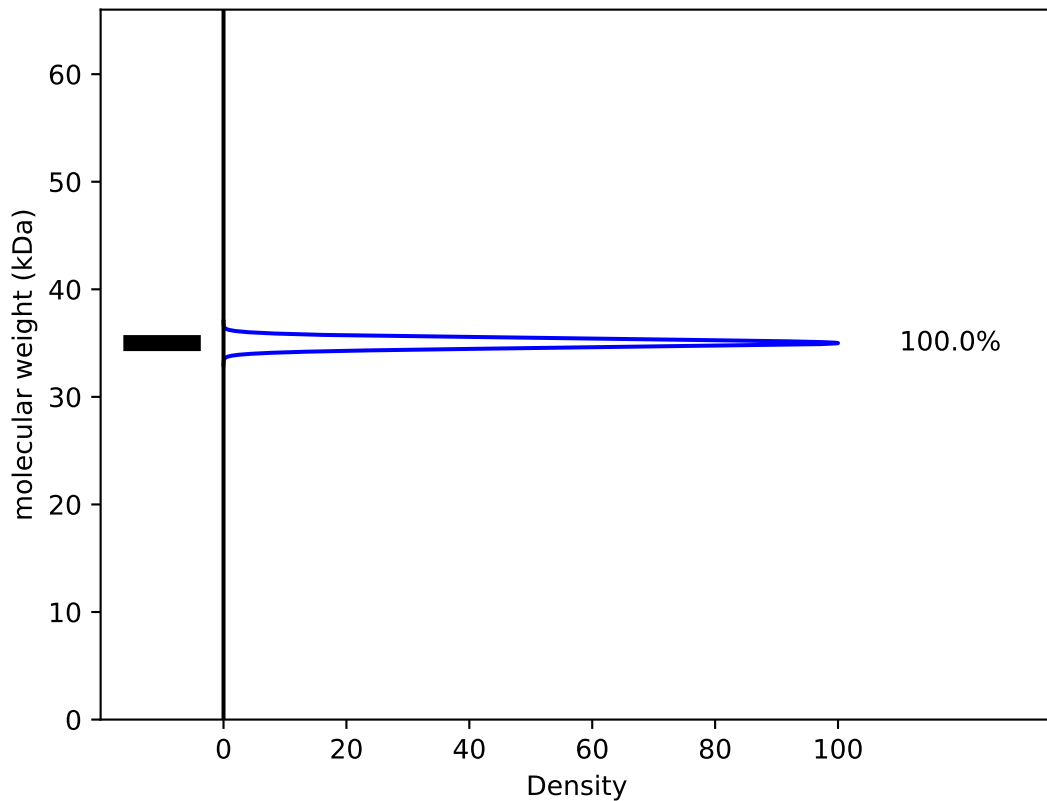

# Q9NWU5



# Q9NX63

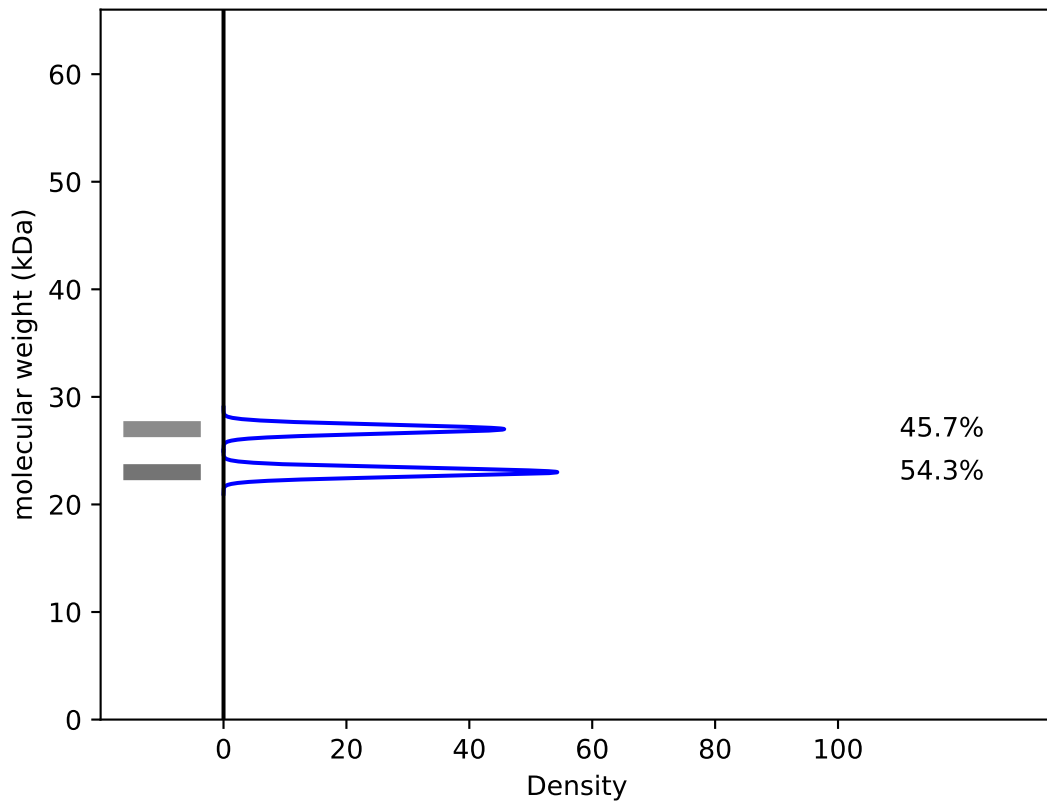

# Q9NXW2





# Q9NYL9



# Q9NZR1



P28289



# Q9NZ01

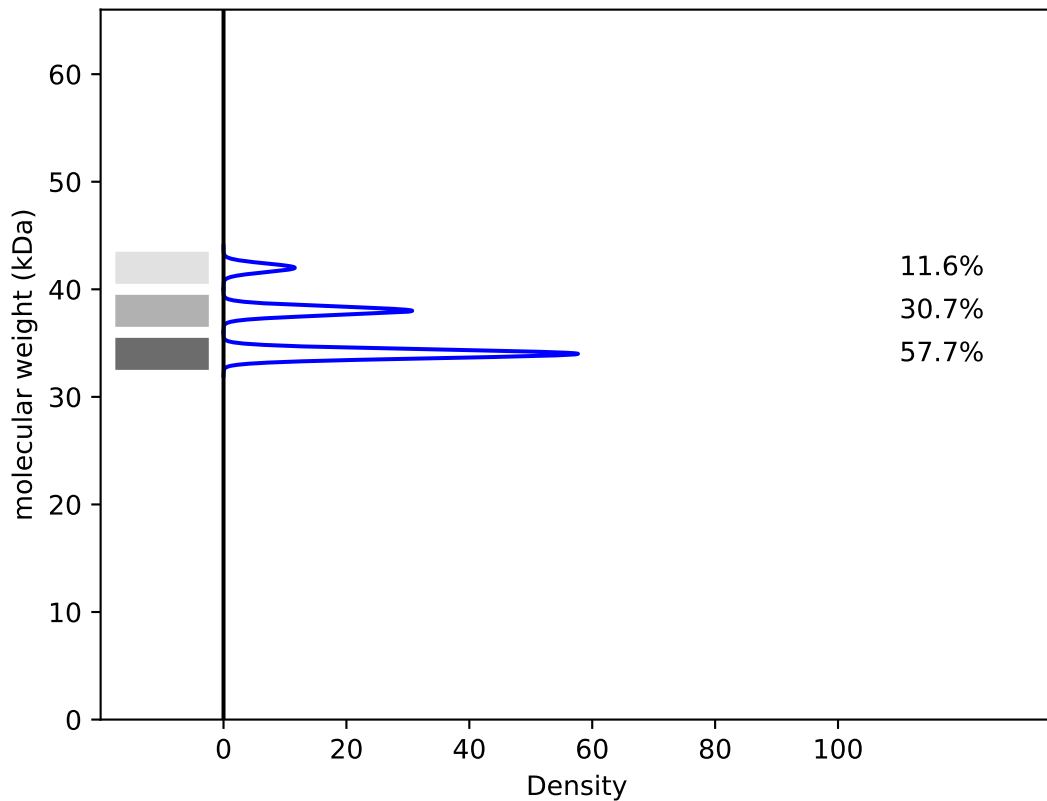

# Q9NZ63



# Q9NZL4

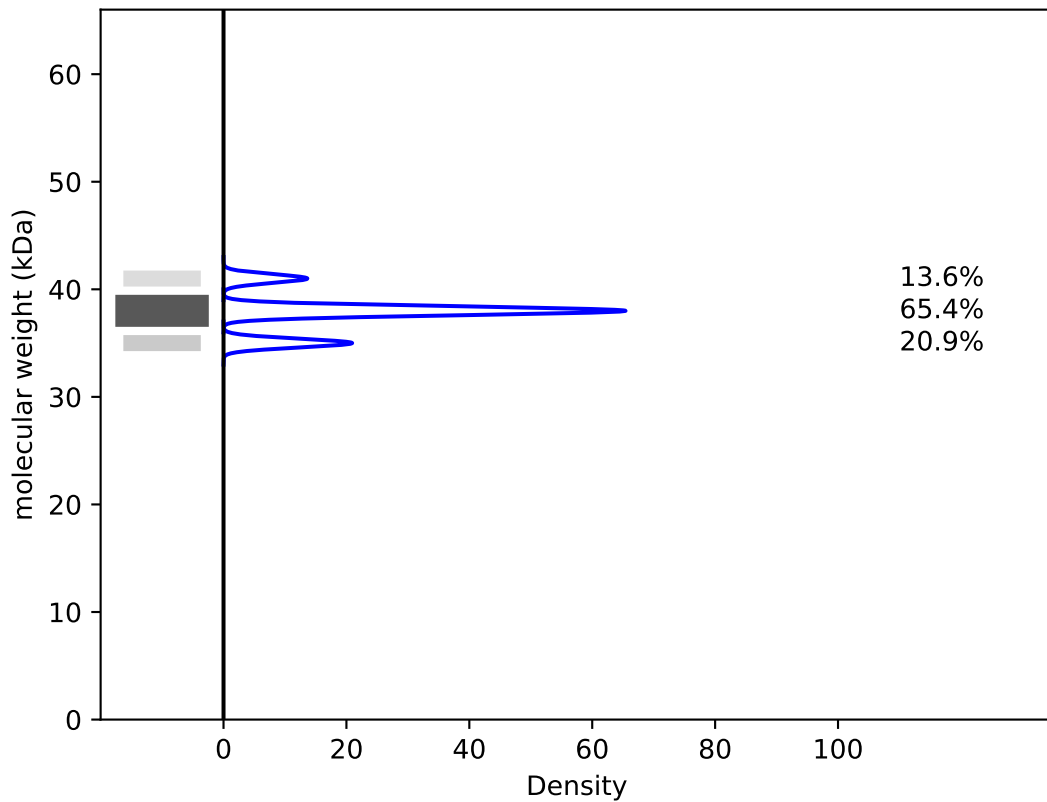

# Q9NZL9



# Q9P000

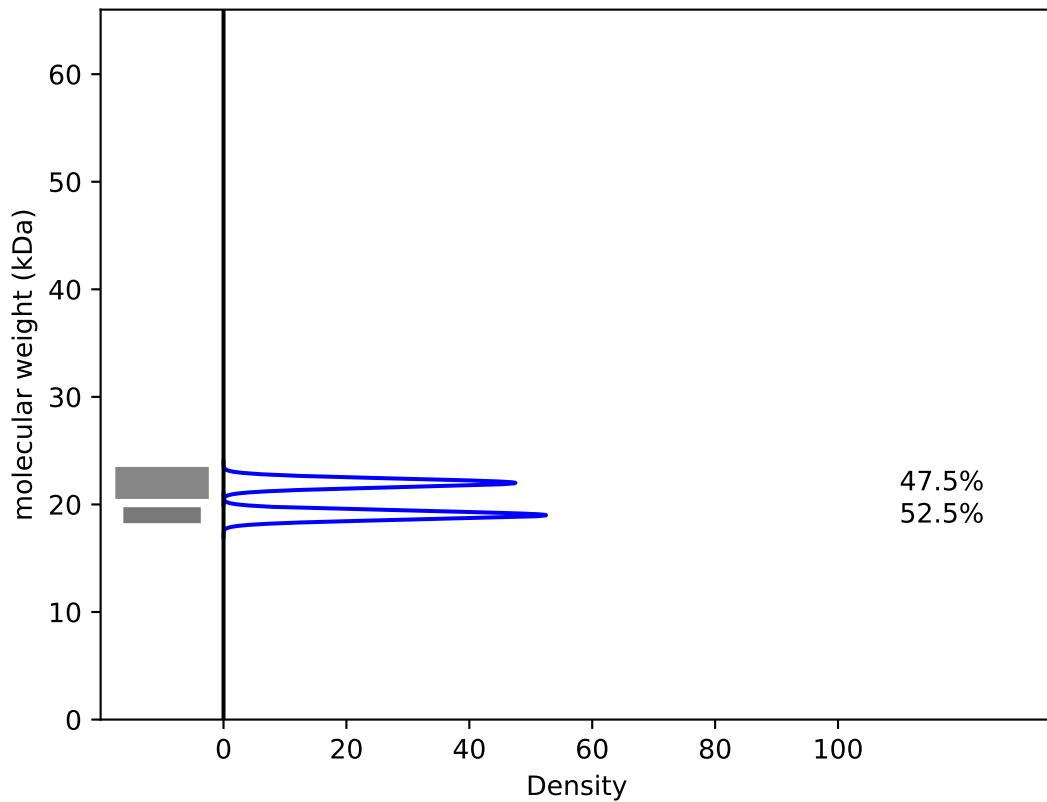



# Q9P015



# Q9P016

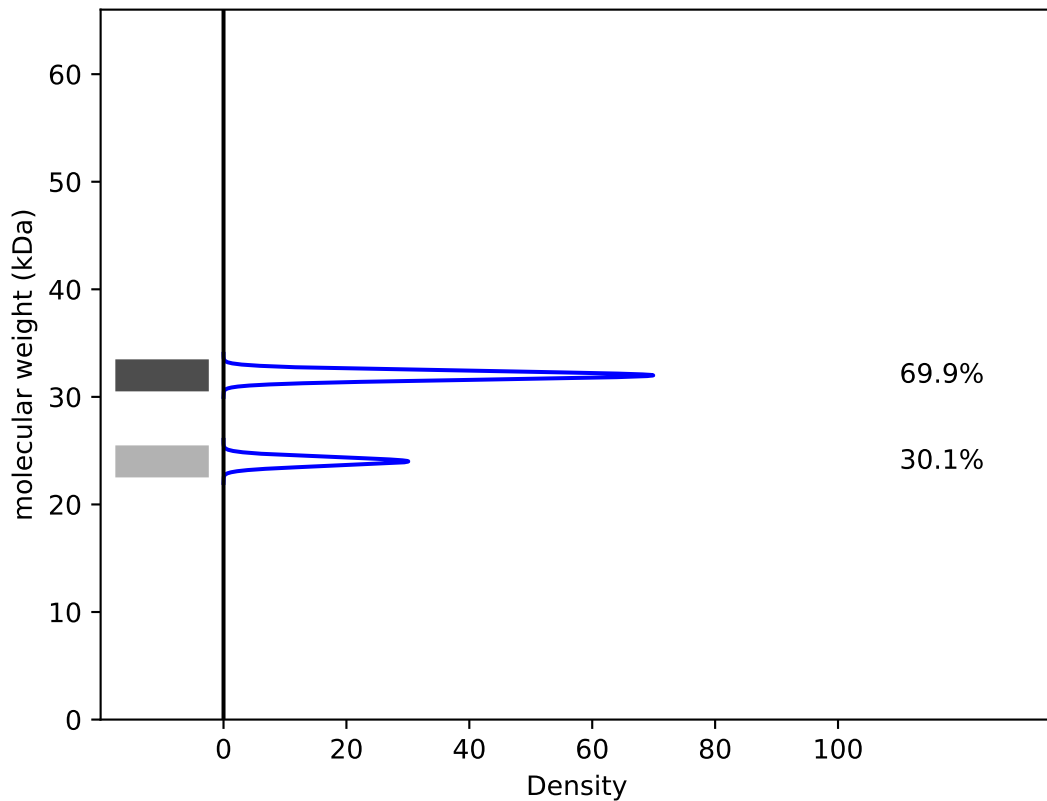

# Q9P032



# Q9P0I2



# Q9P0L0



# Q9P0V9



# Q9P258



# Q9P289

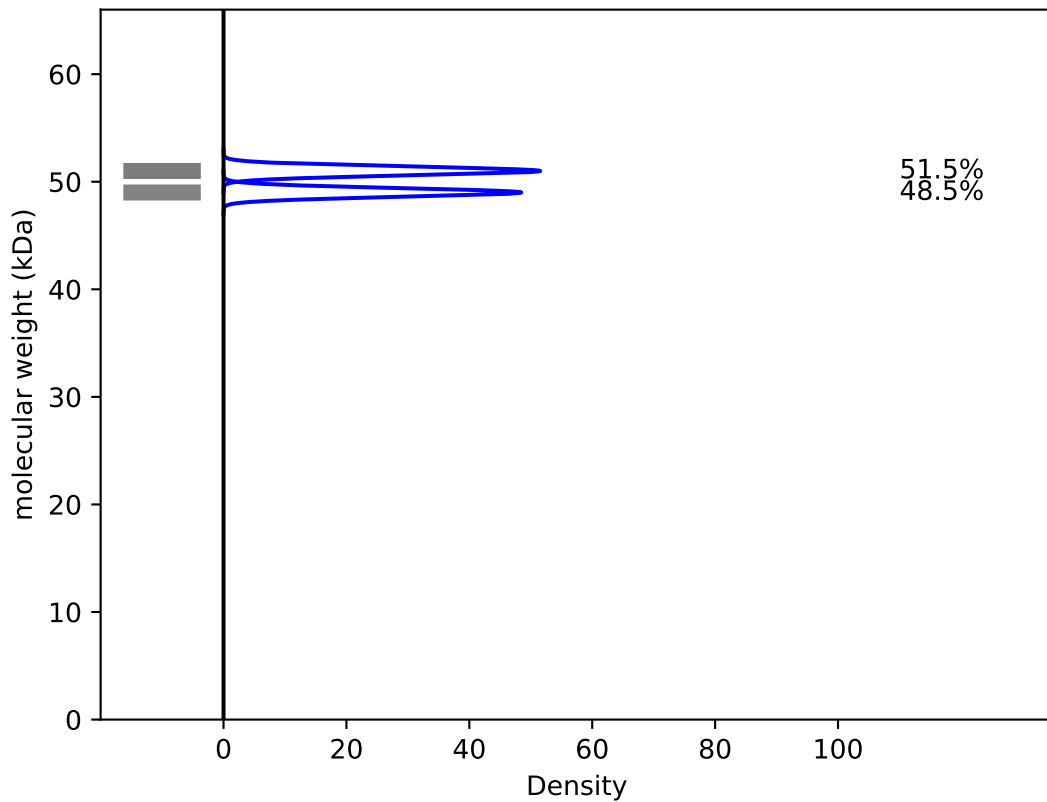



O00506



# Q9UBB4



# Q9UBE0



# Q9UBM7



# Q9UBP6



# Q9UBQ0

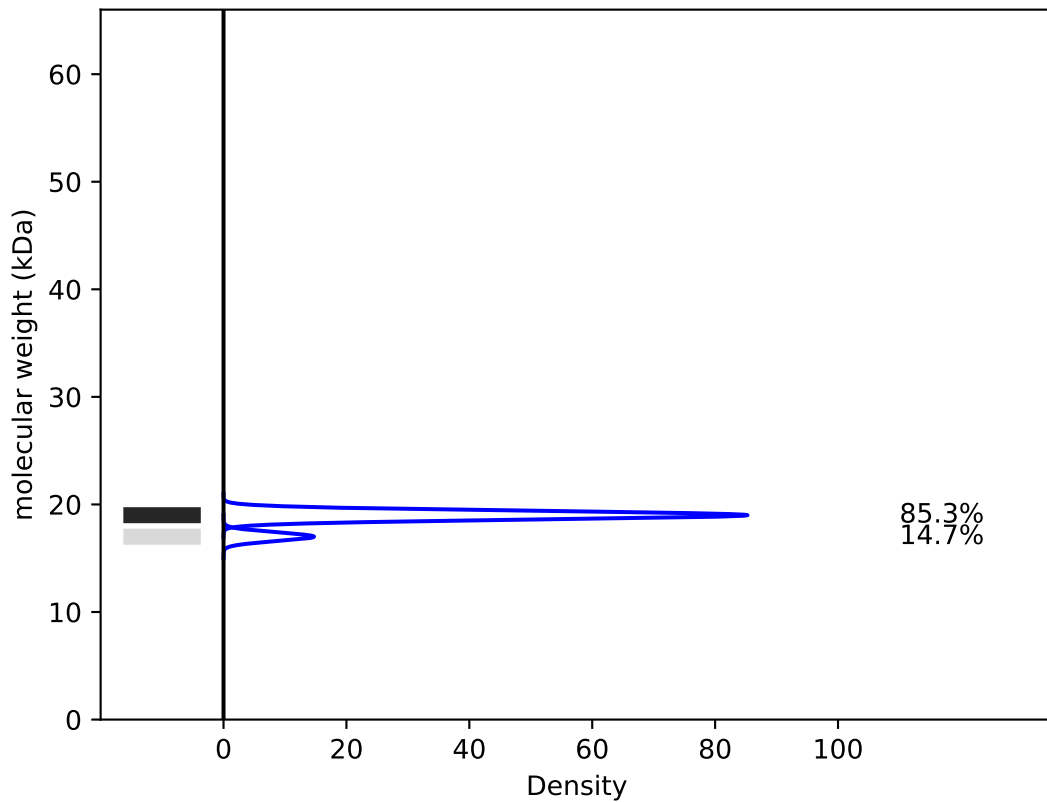

# Q9UBQ5



# Q9UBQ7

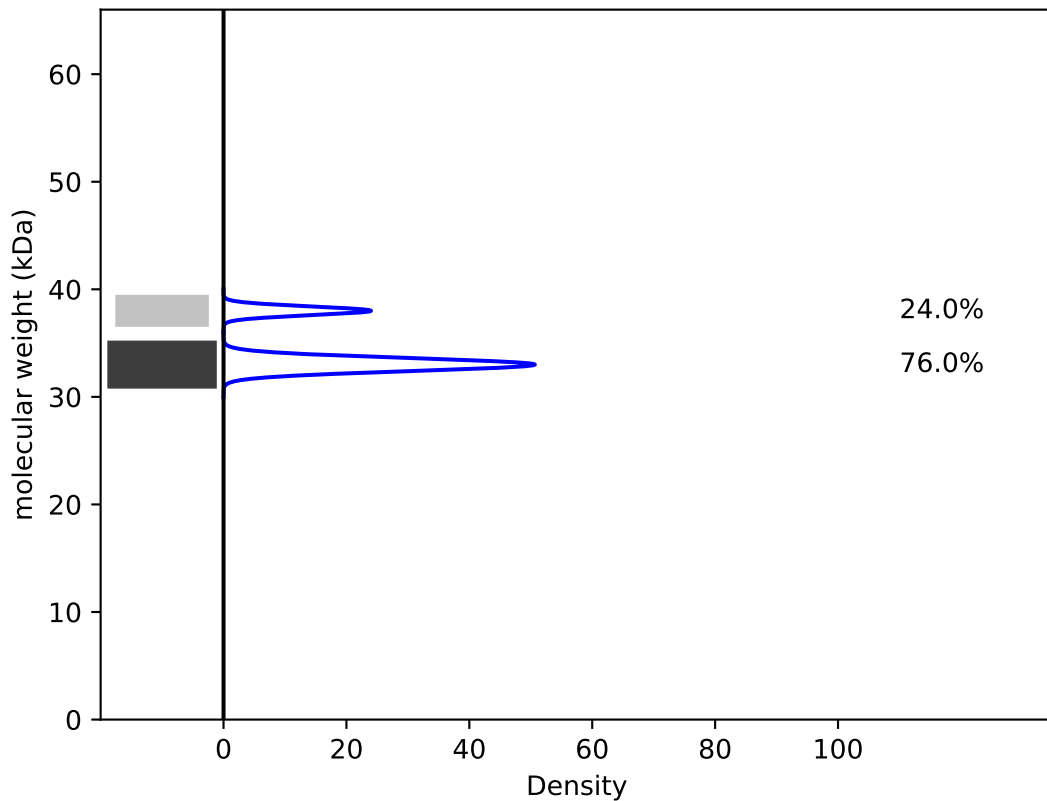



# Q9UBR2



# Q9UBS4



# Q9UBU8



# Q9UBW8

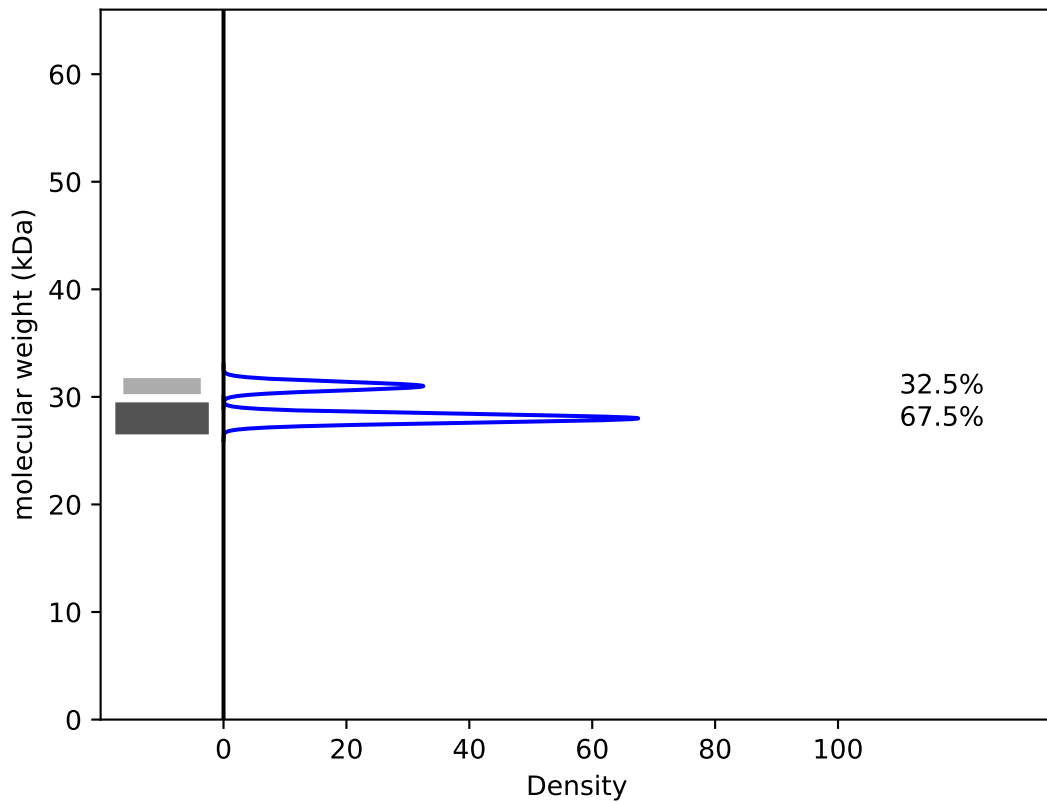

# Q9UBX3

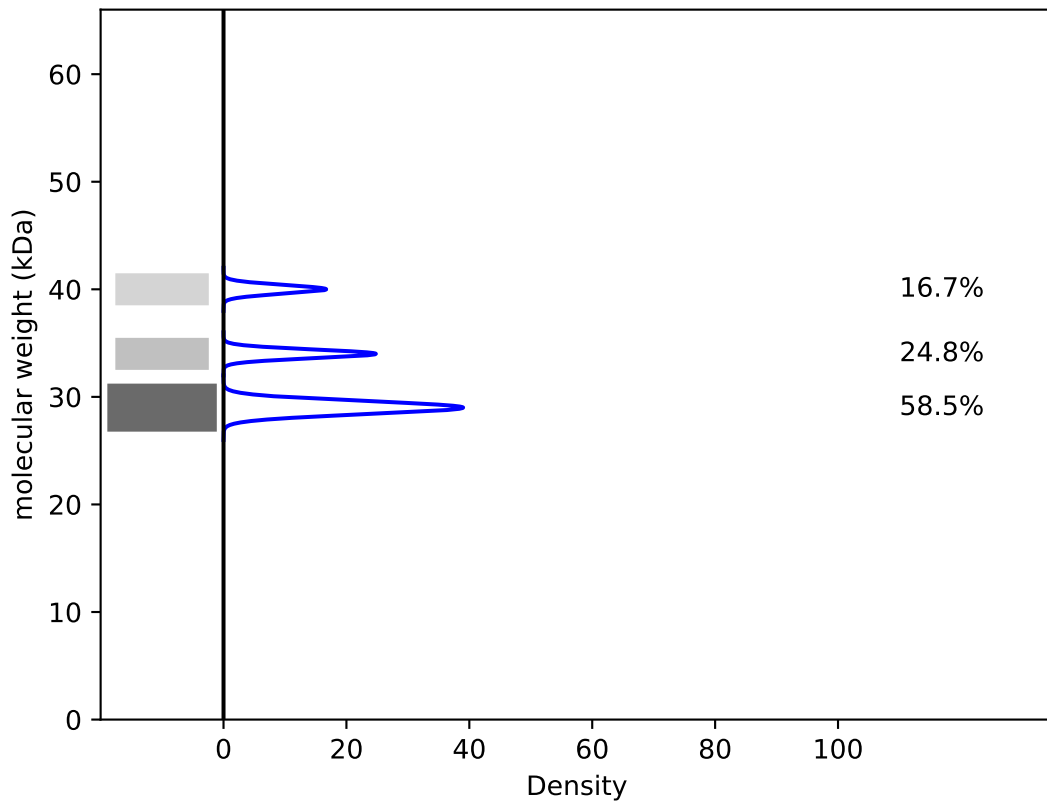

# Q9UHD1



# Q9UHG3



# Q9UHX1





# Q9UHY7



# Q9UI10



# Q9UIJ7

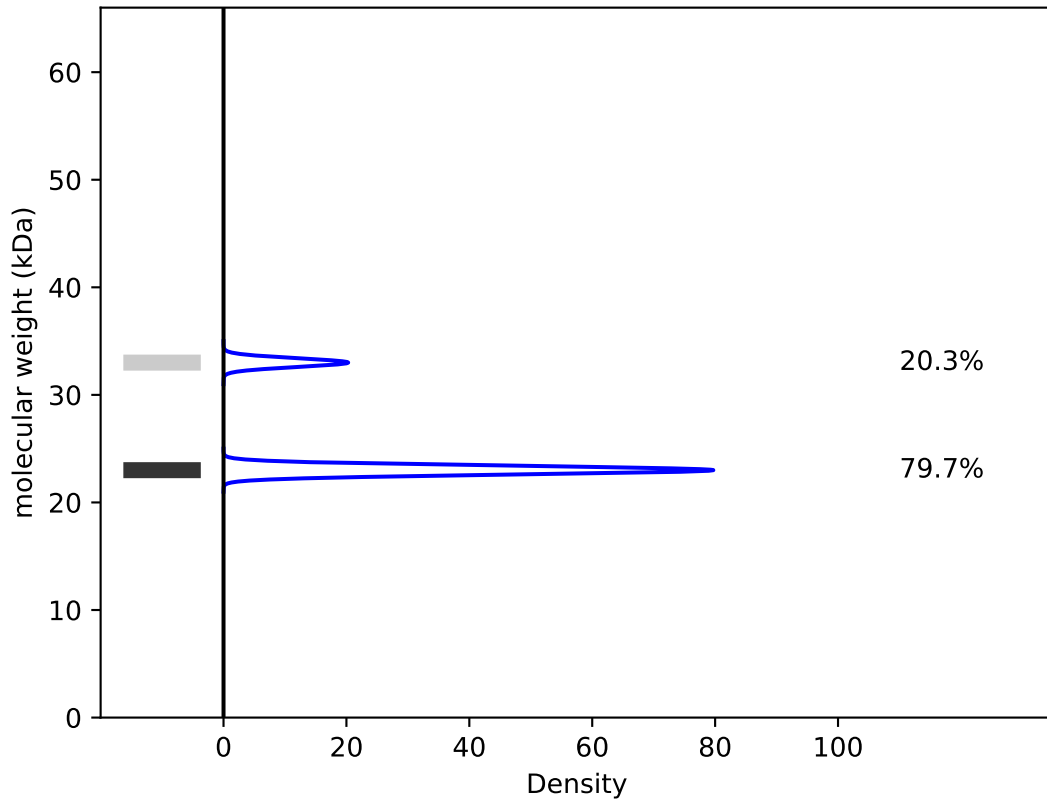

# Q9UJ70

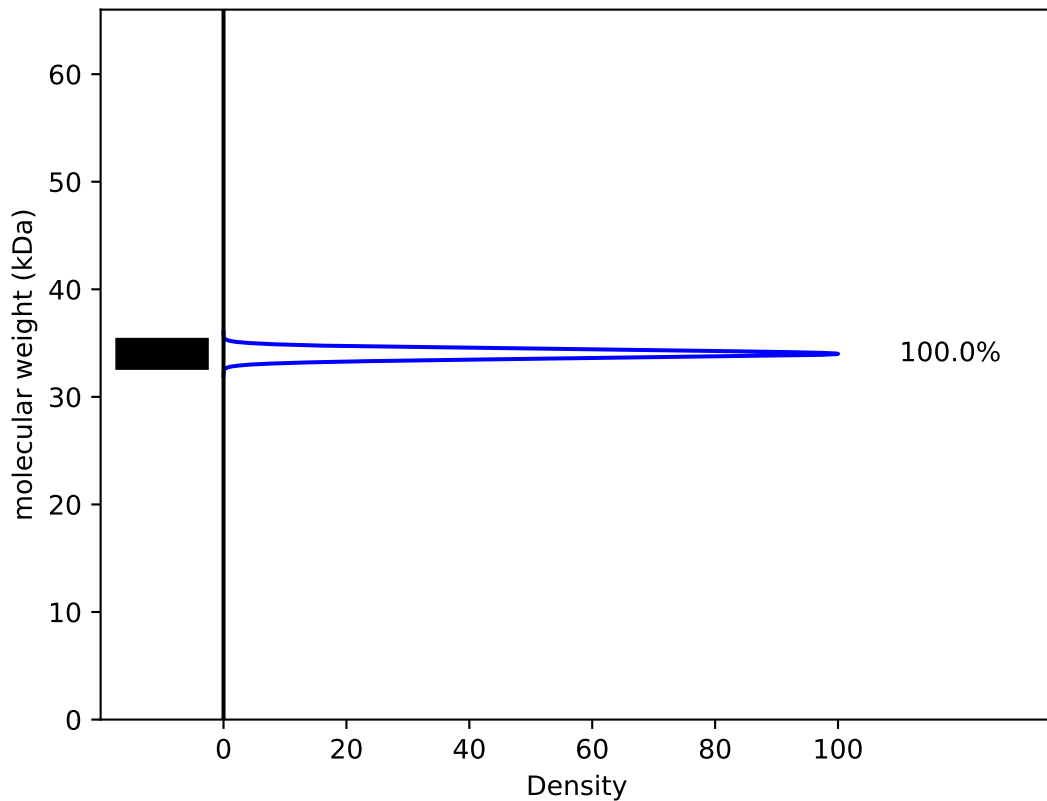

# Q9UJZ1



# Q9UKD2

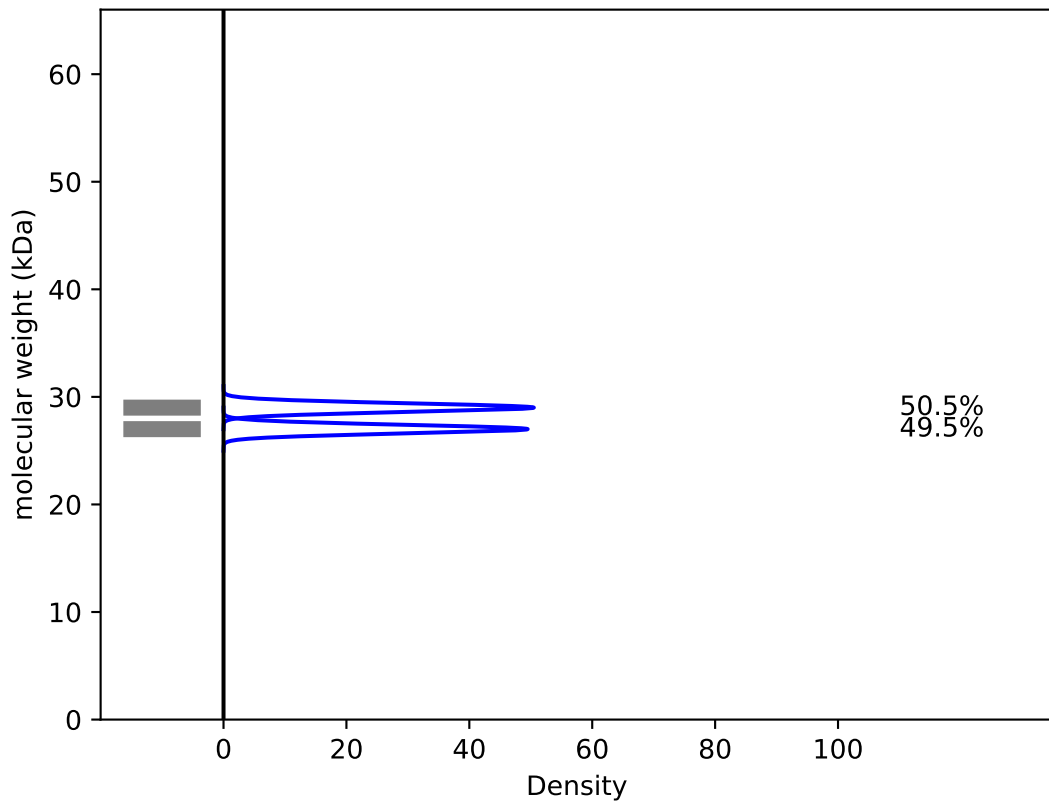

Q9UKK9

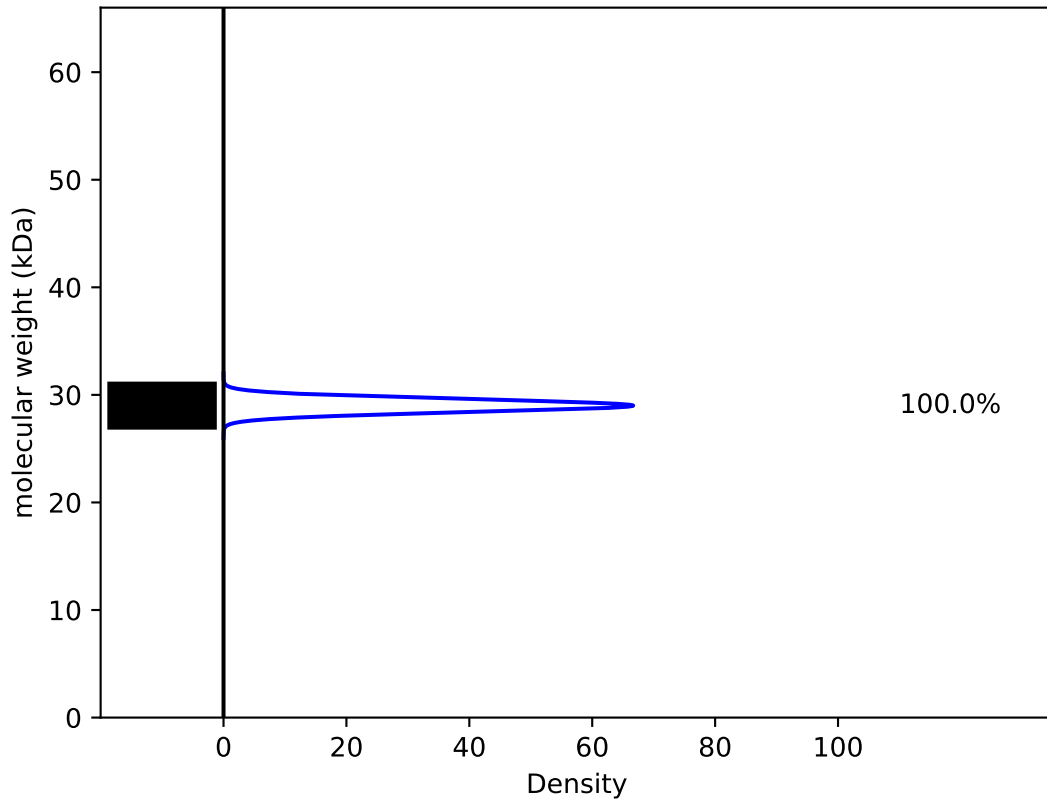

# Q9UKM9

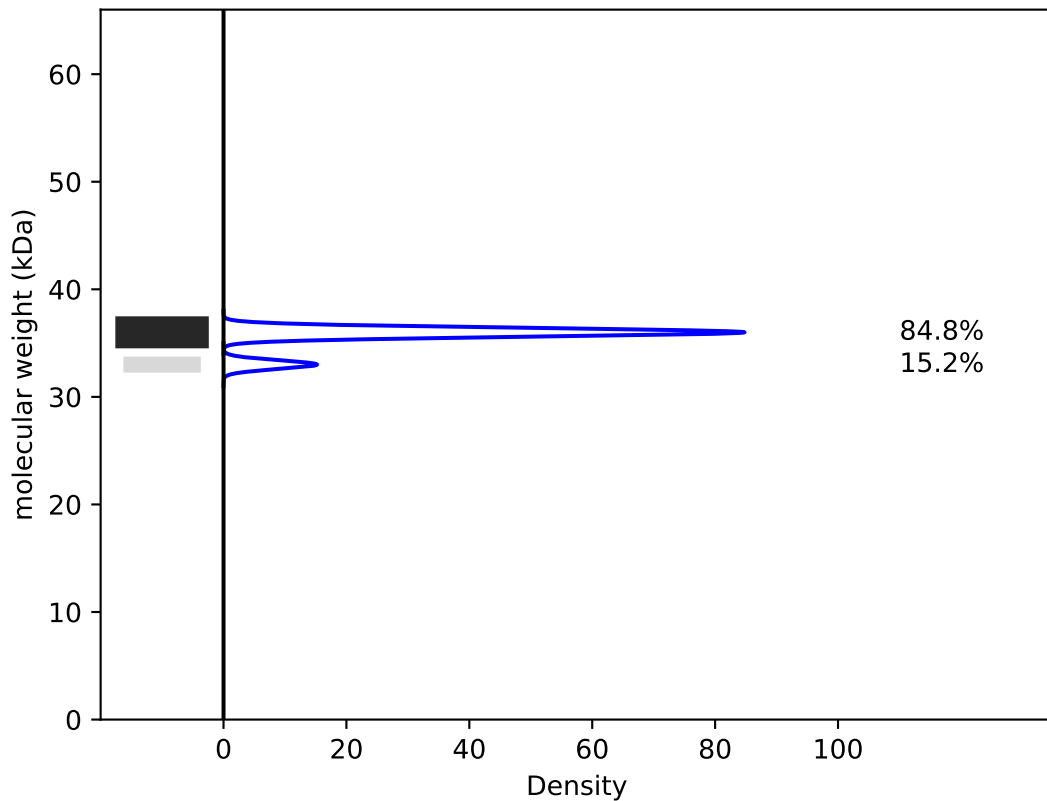



# Q9UKS6



# Q9UL25

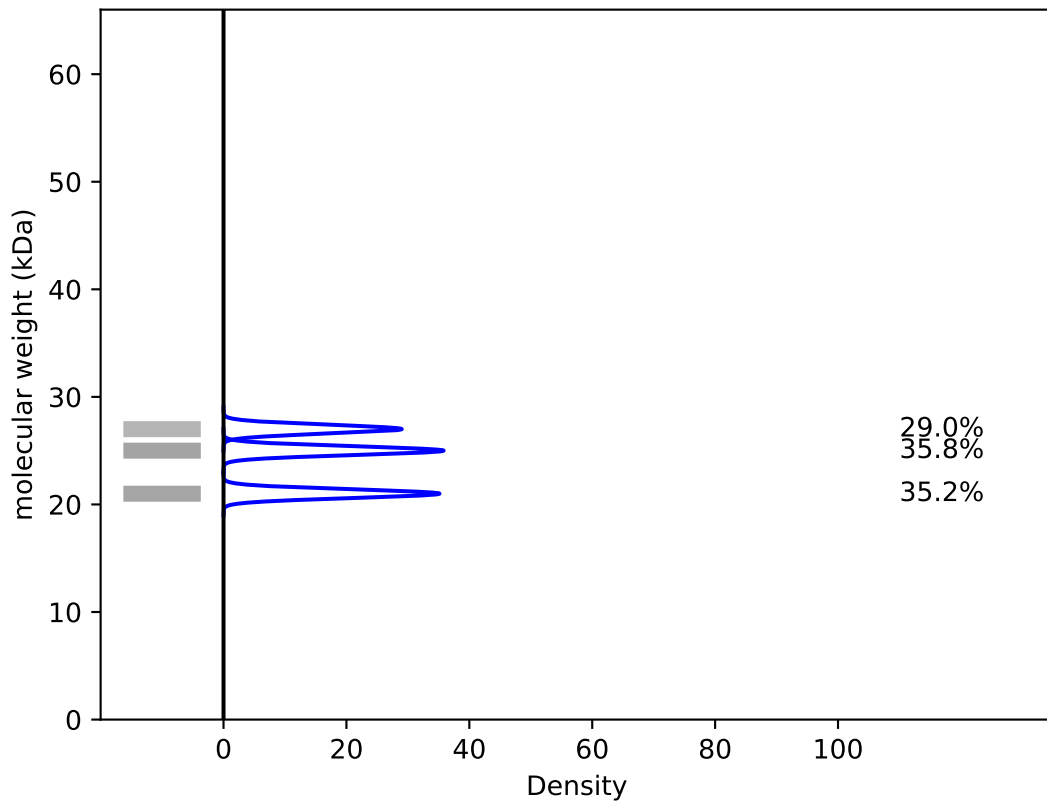

# Q9UL46

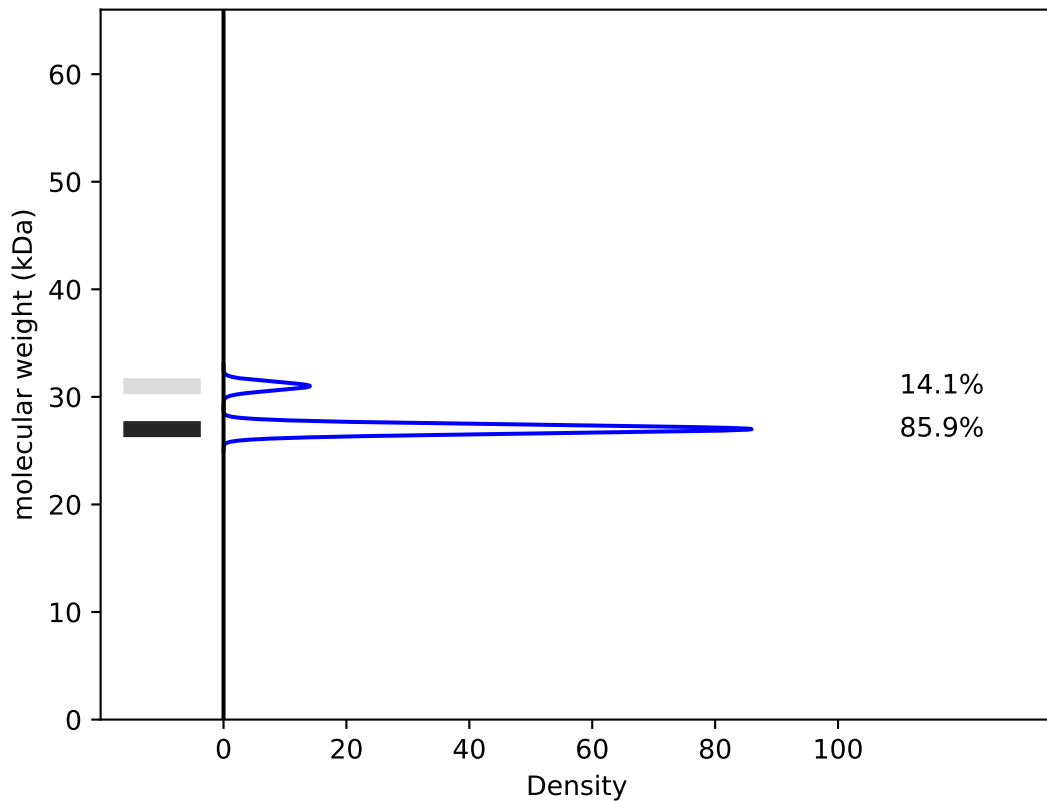

# Q9ULC4



# Q9ULV4



# Q6QEF8



# Q9ULX3

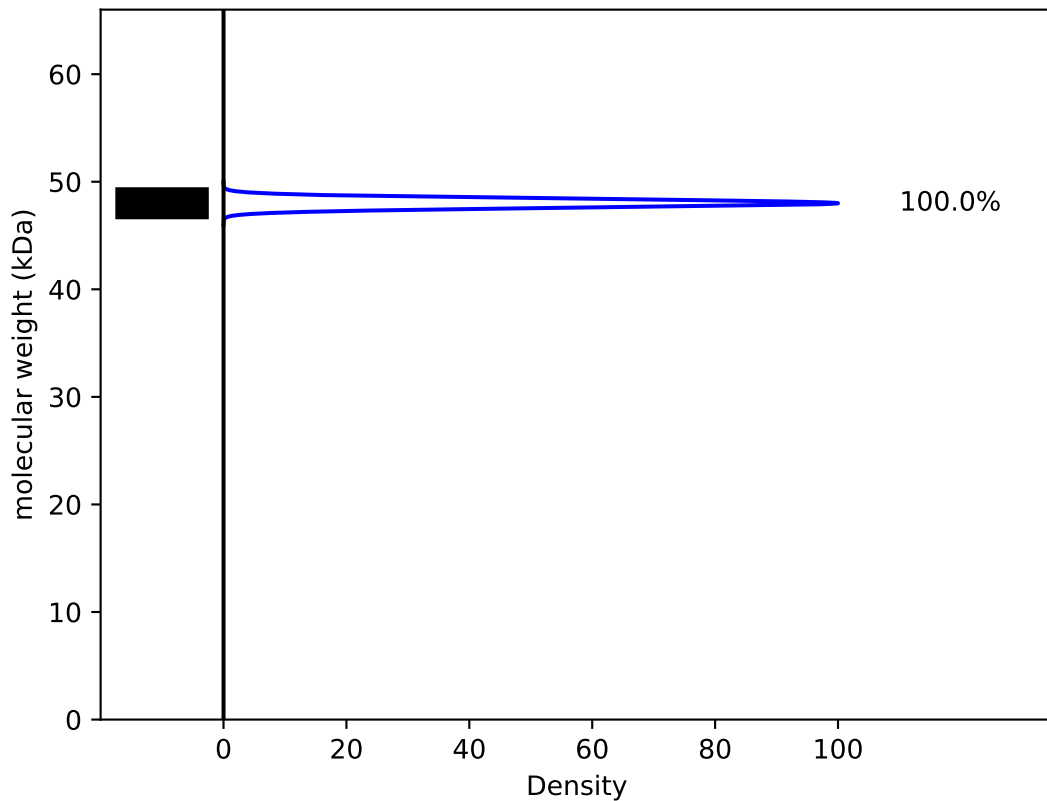

# Q9UM00





# Q9UMS4



# Q9UN86



# Q9UNE7



# Q9UNF0



# Q9UNH7

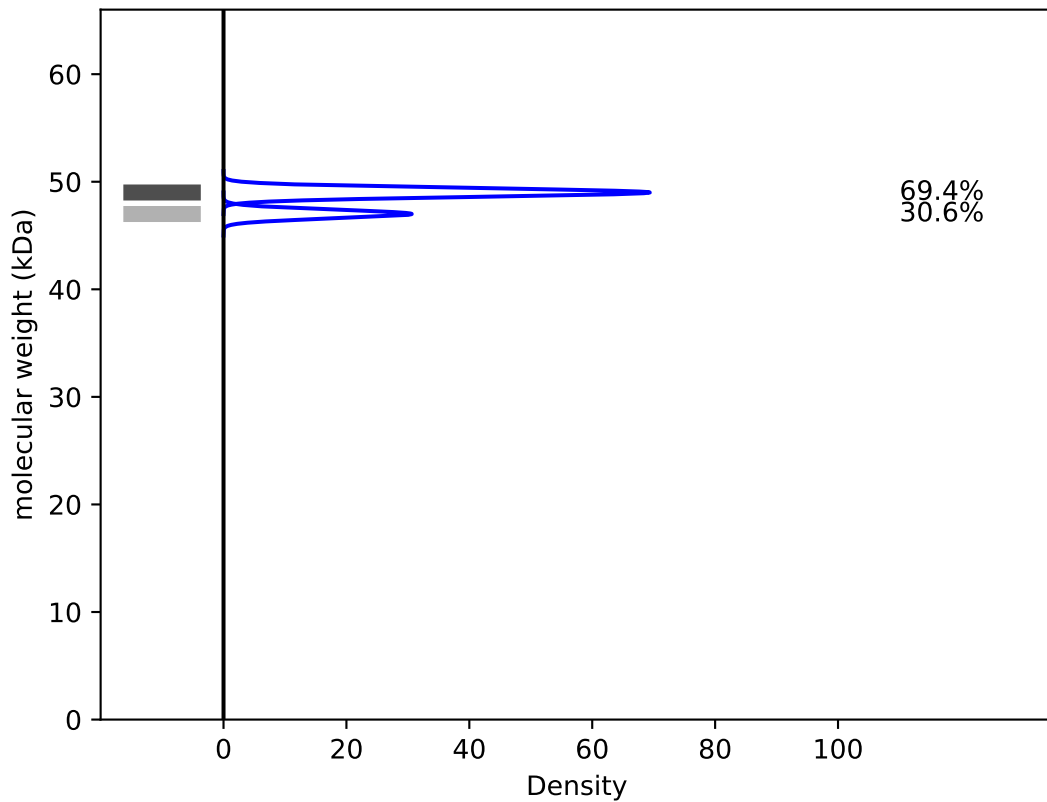

# Q9UNI6



# Q9UNL2

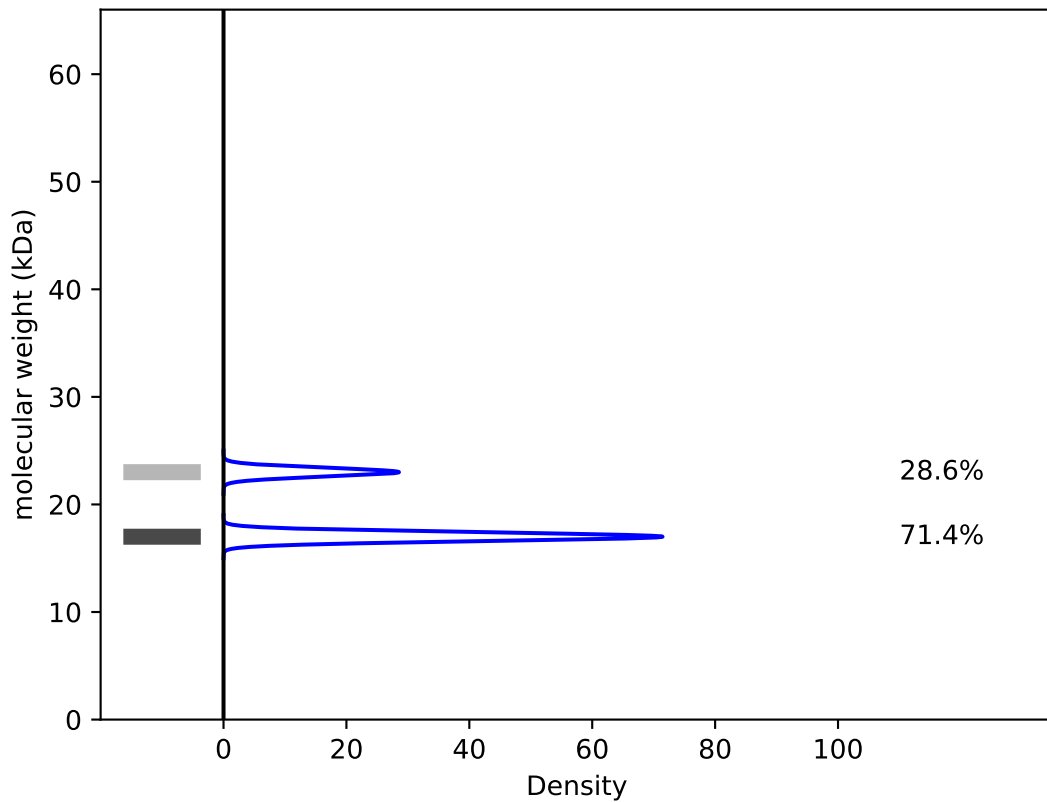

# Q9UNM6

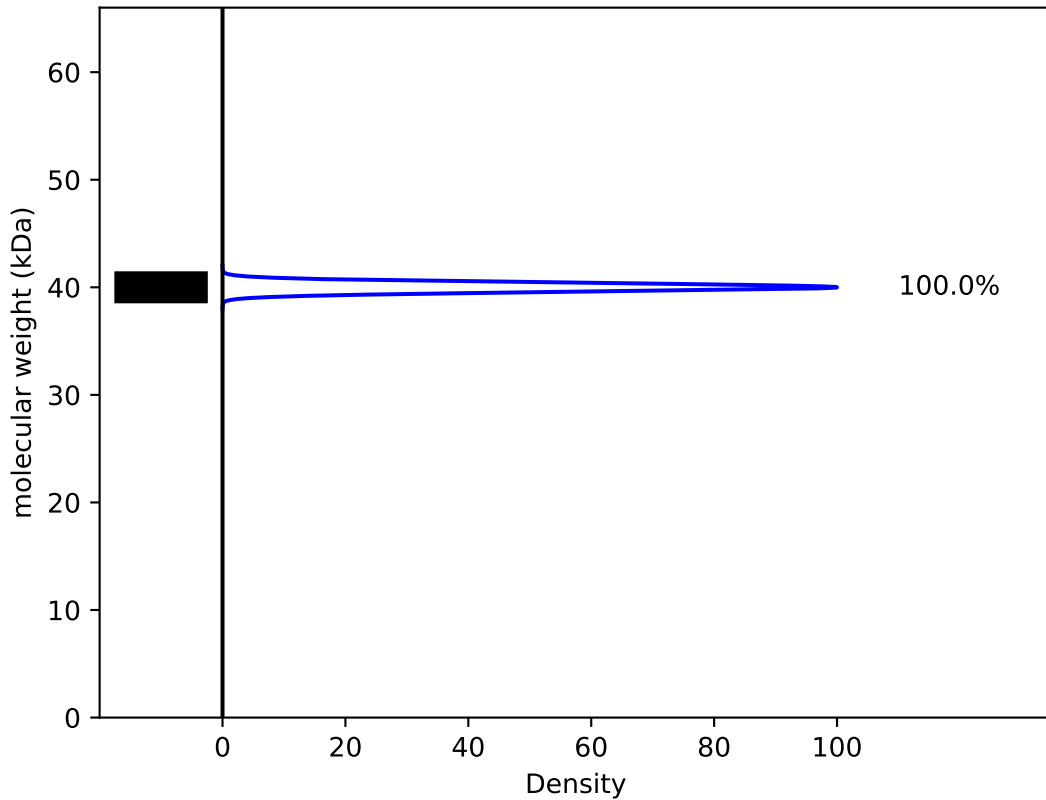



# Q9UNP9



# Q9UNQ2

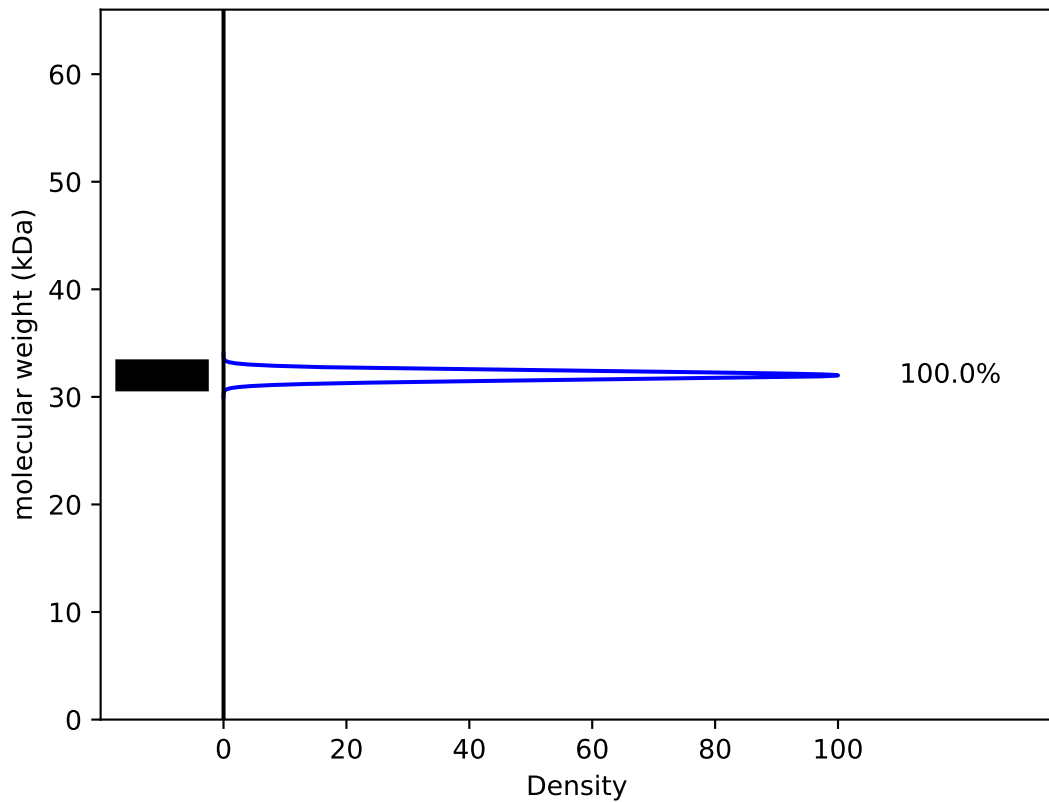

# Q9UNS2



# Q9UQ80

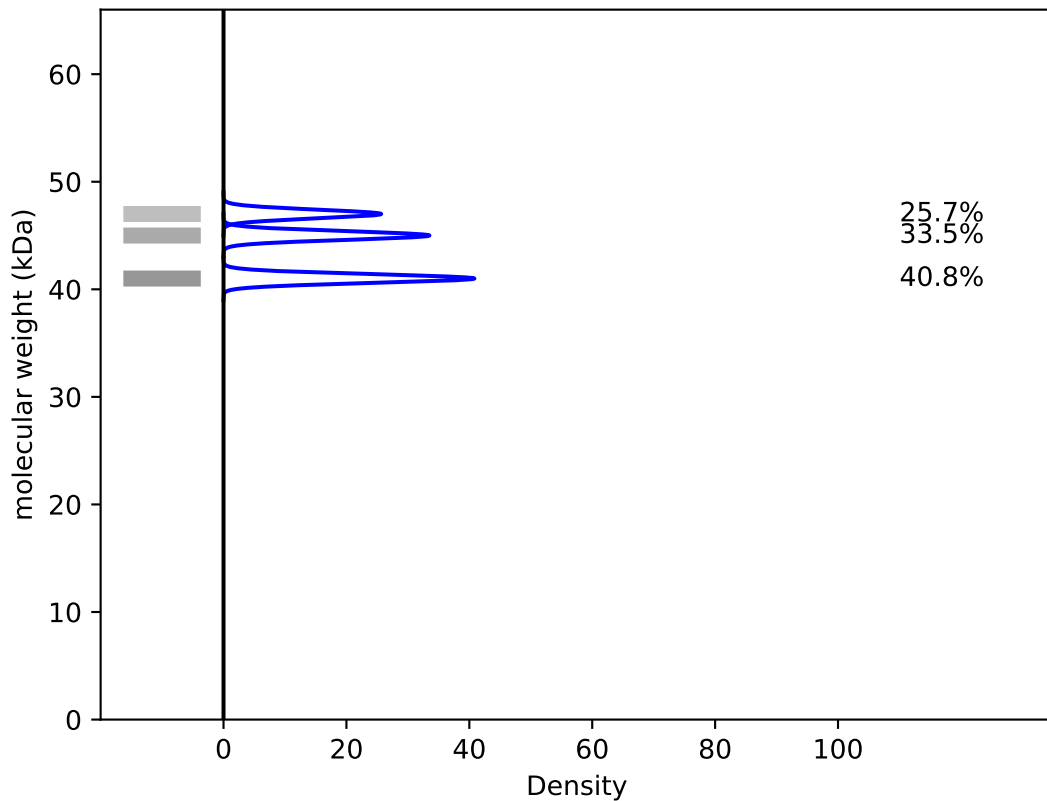

# Q9Y221

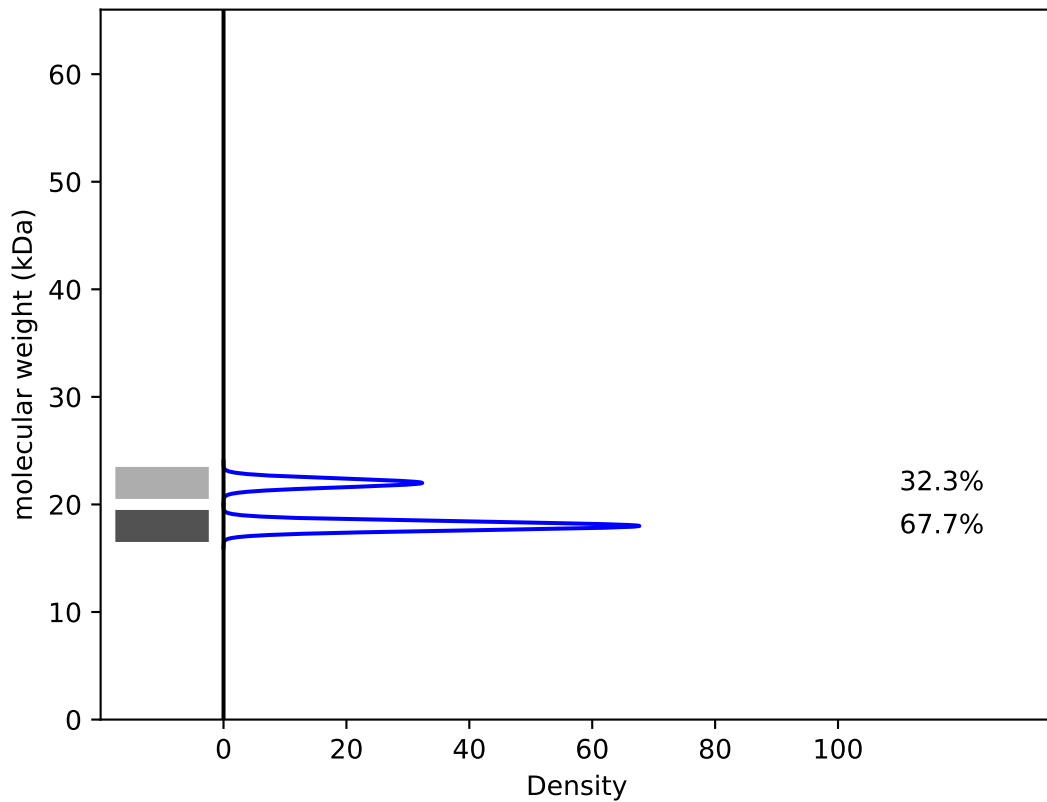

# Q9Y230

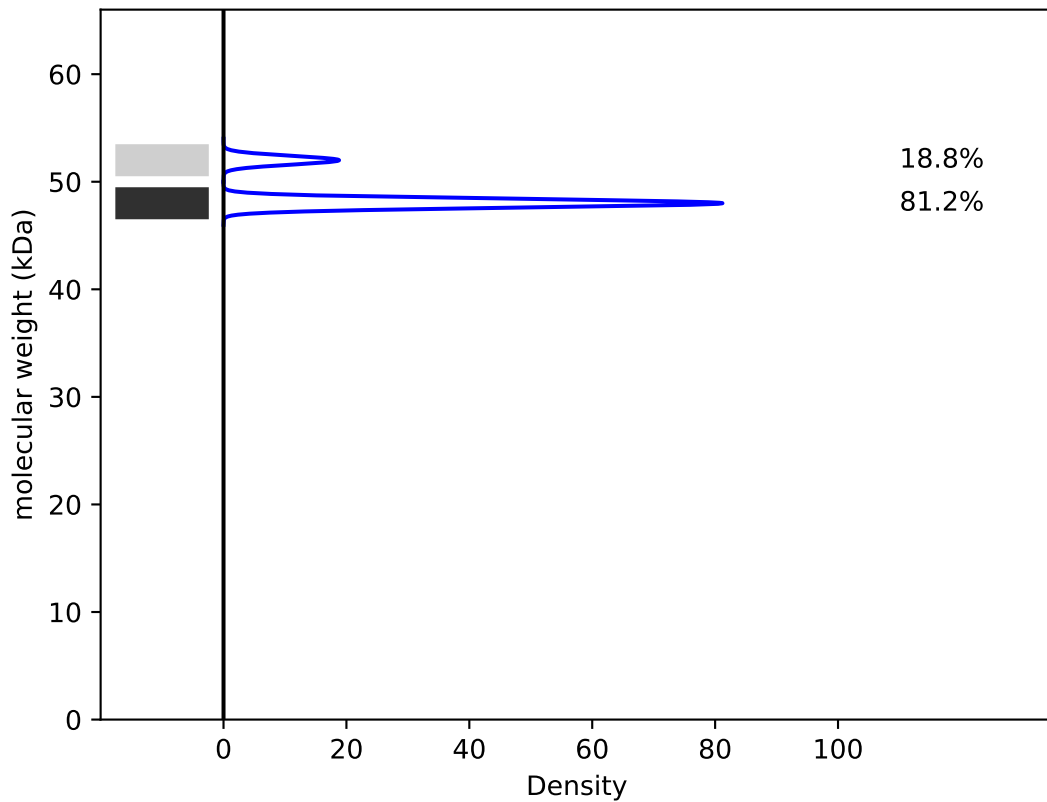

Q9Y265



# Q9Y266





# Q9Y277

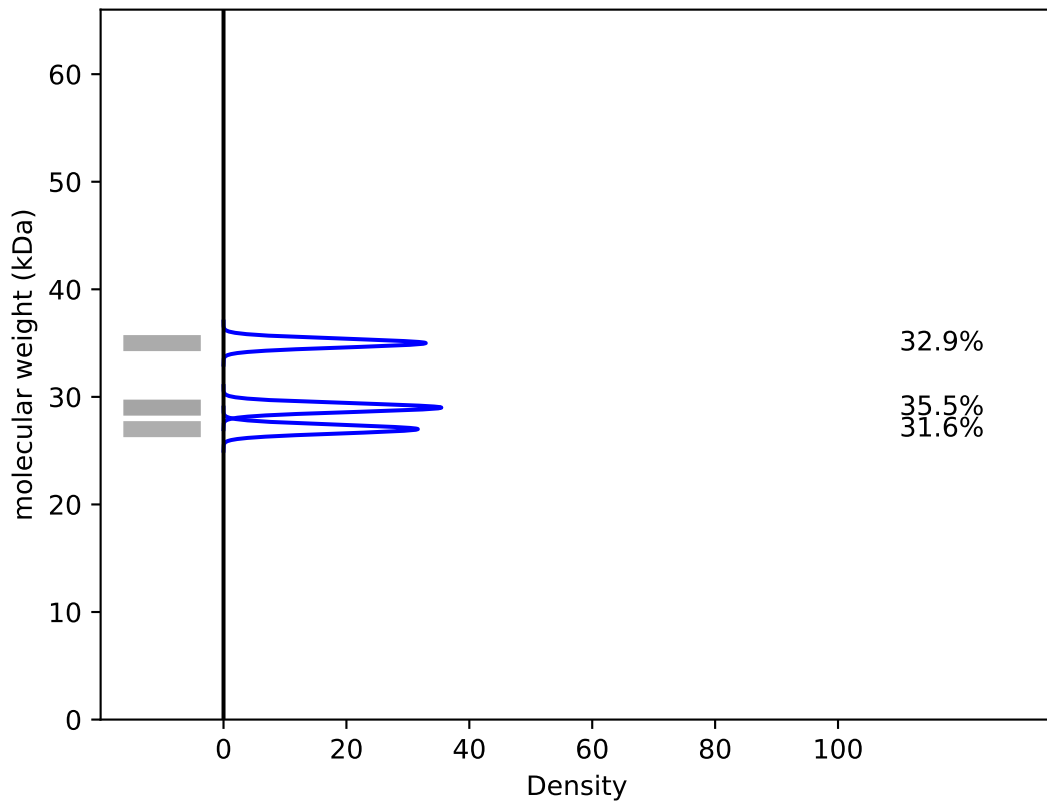

# Q9Y295



Q9Y2P8

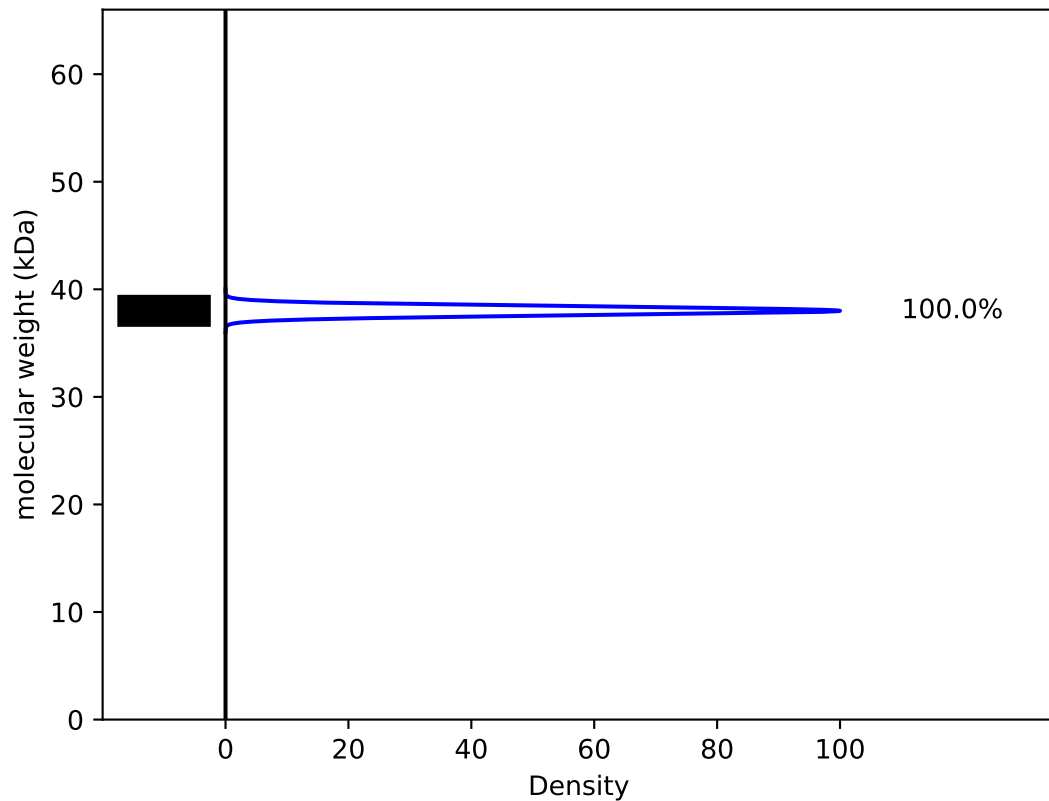

Q9Y2Q3



Q9Y2S7



Q9Y2T3



Q9Y2X3



Q9Y2Z0





# Q9Y305

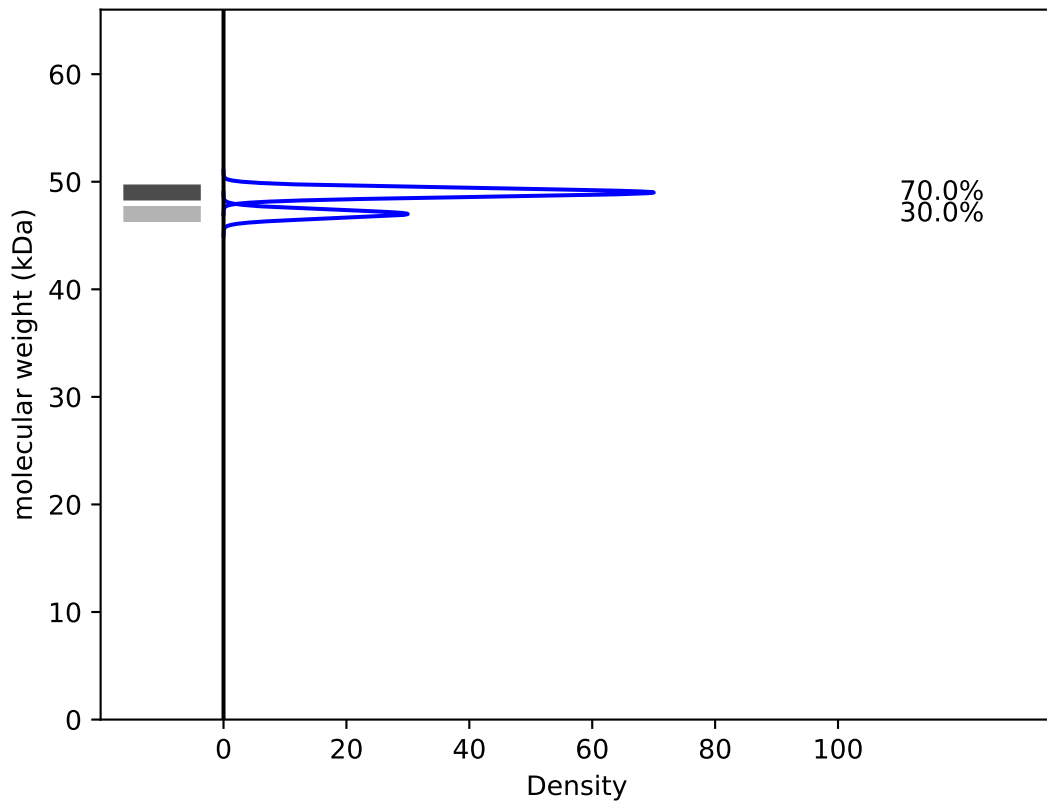

# Q9Y314



# Q9Y315

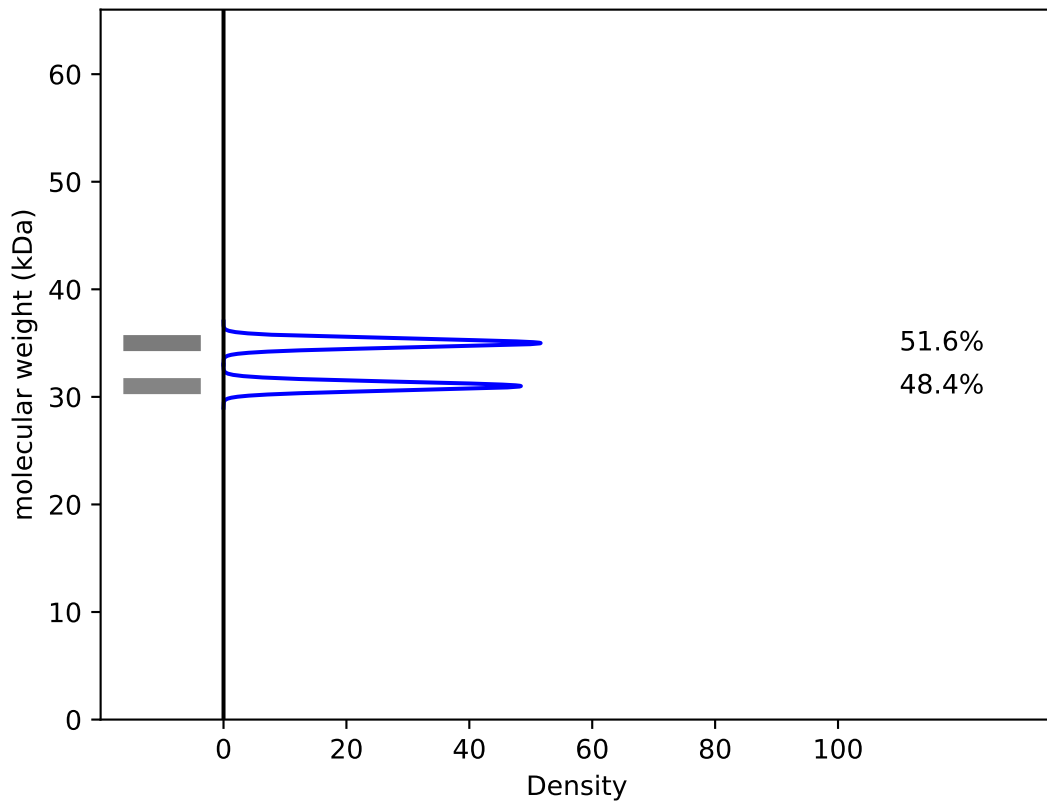

# Q9Y376



# Q9H9S4



# Q9Y399



Q9Y3A5



# Q9Y3B2

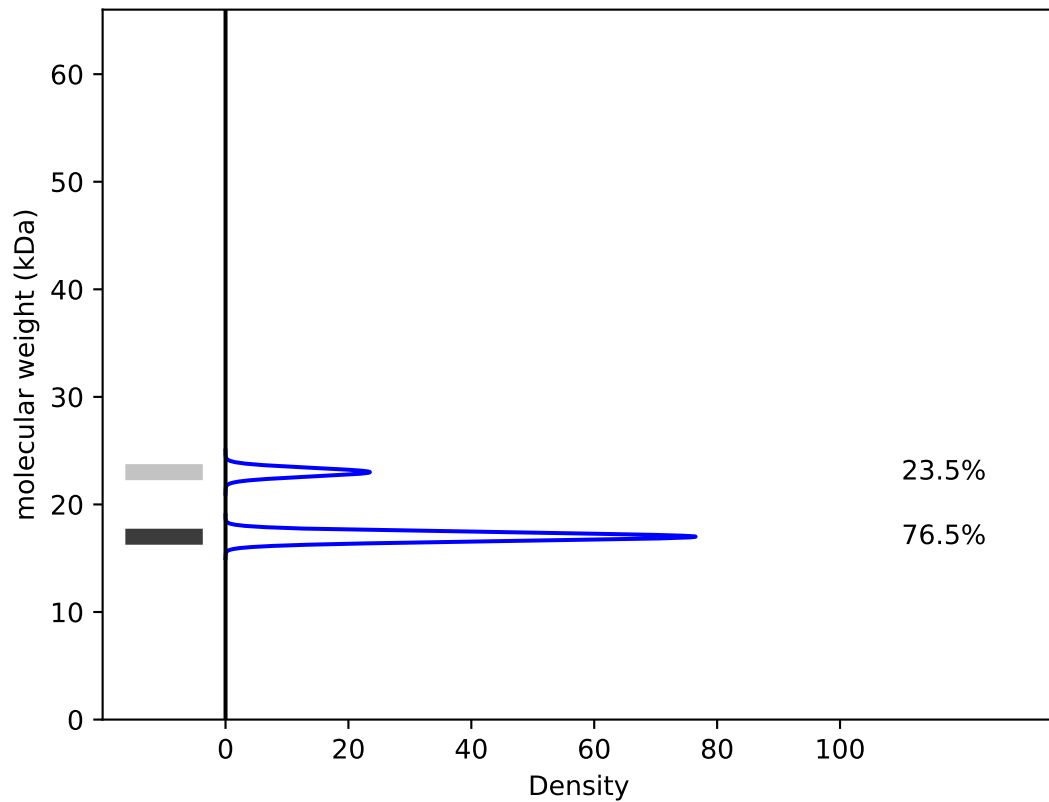



# Q9Y3B3



Q9Y3B7



Q9Y3B8



# Q9Y3C1



Q9Y3C8



Q9Y3D9



Q9Y3E5



# Q9Y3F4

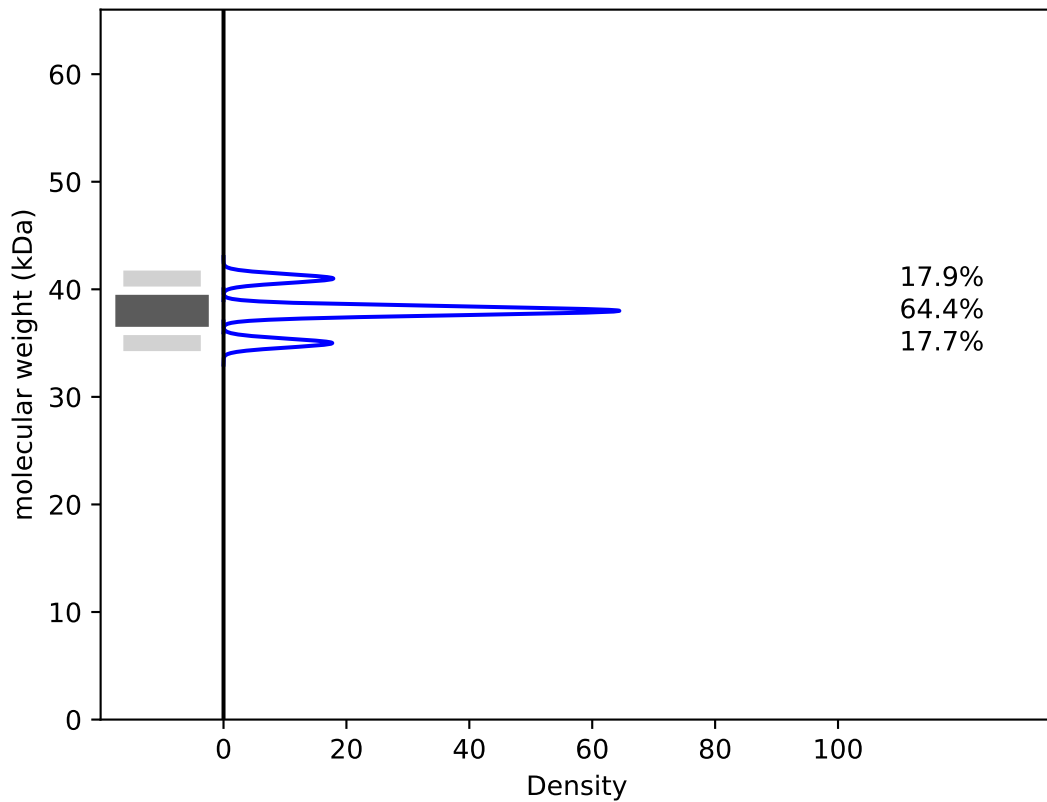



Q9Y3Q3



Q9Y3Y2



# Q9Y584



# Q9Y5B8



# Q9Y5K5

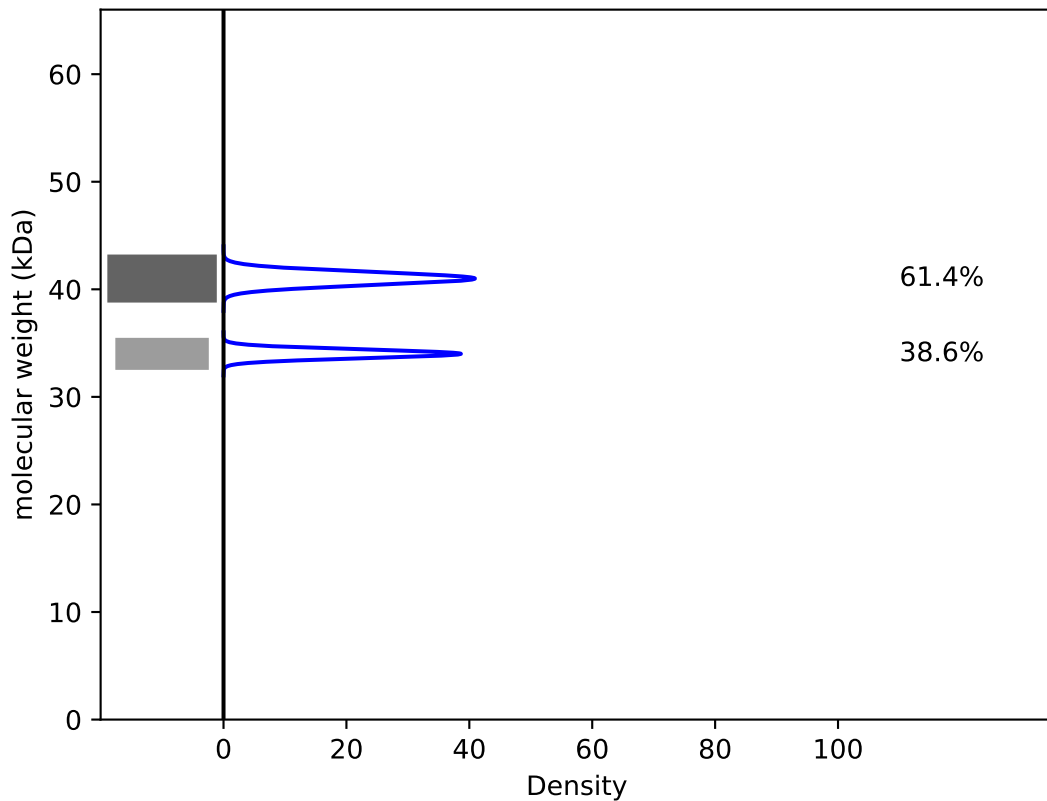

Q9Y5K8



# Q9Y5M8

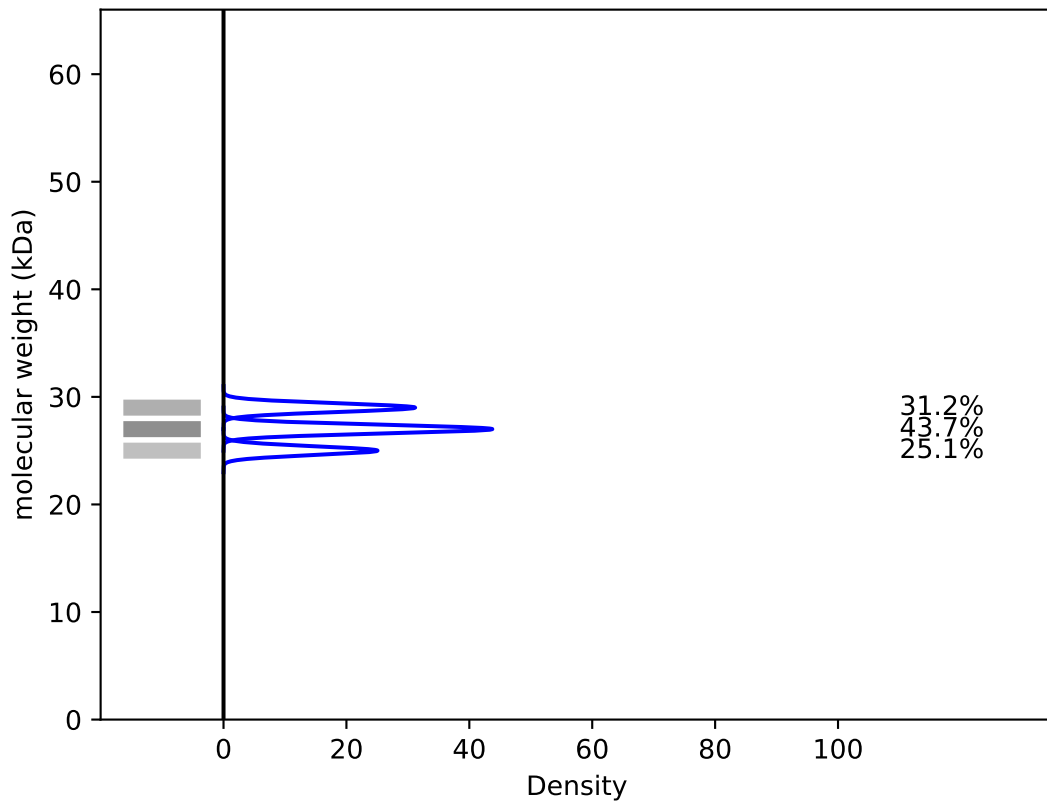

Q9Y5Q8





# Q9Y5S9



Q9Y5Z4



# Q9Y617

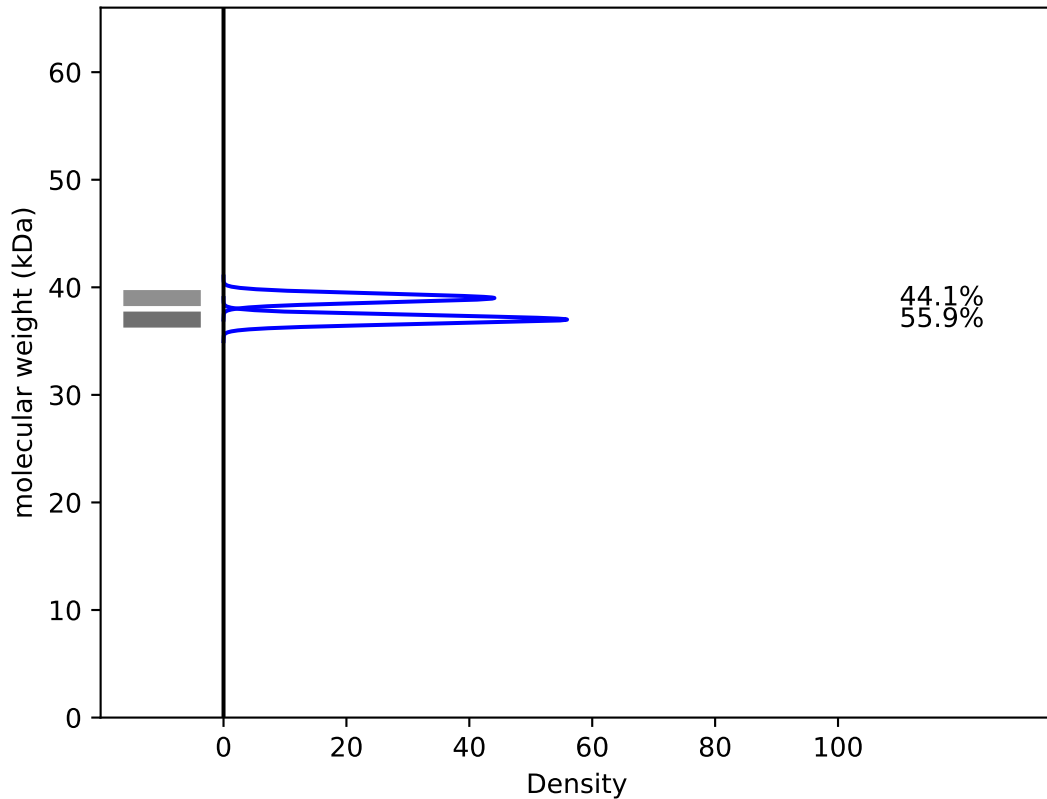

Q9Y673

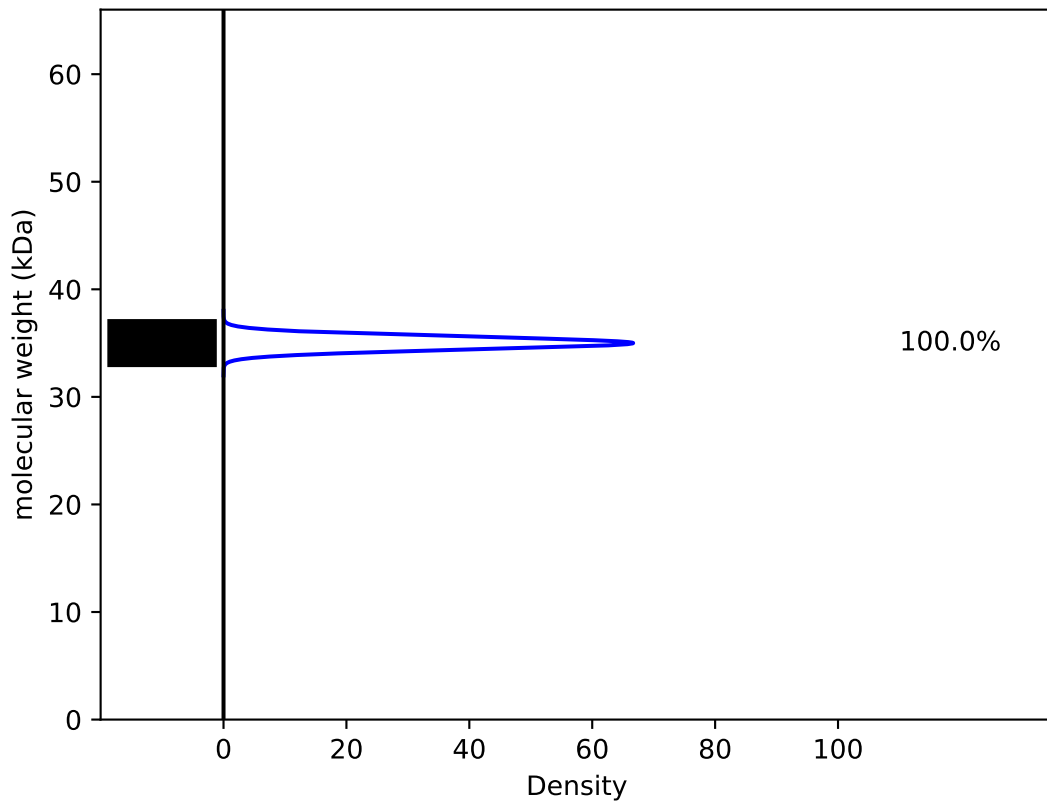

# Q9Y676



# Q9Y696



# Q9Y6A4



Q9Y6B6





# Q9Y6C9

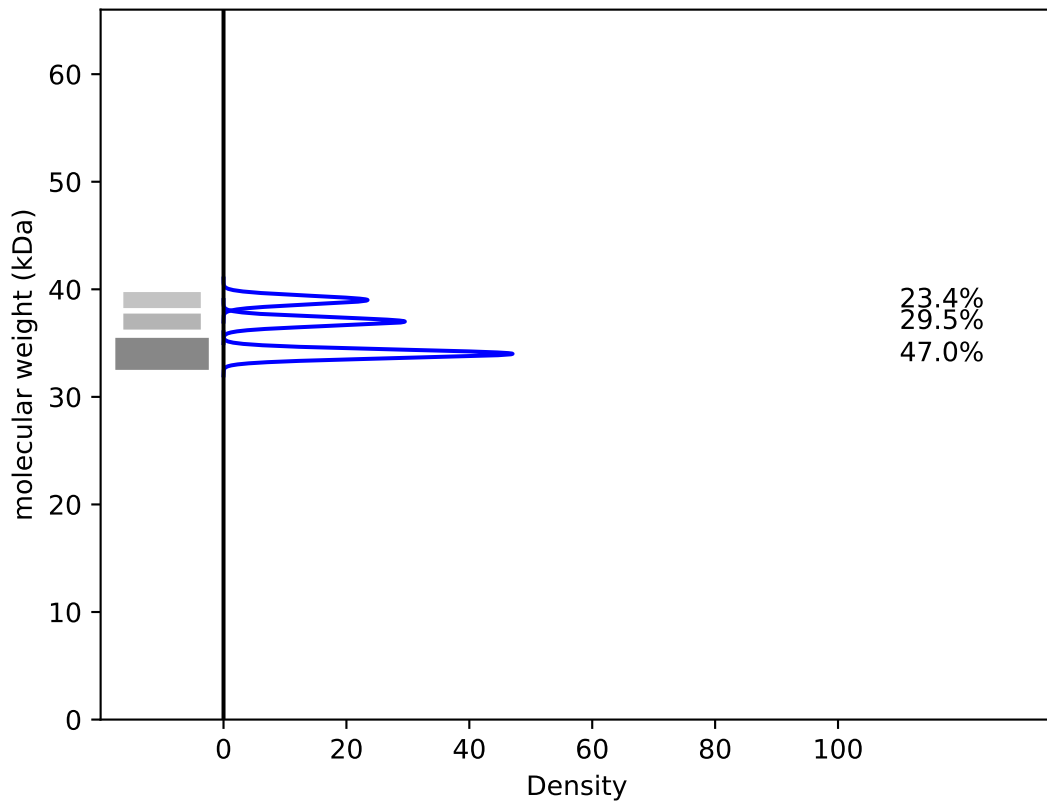

# Q9Y6E2

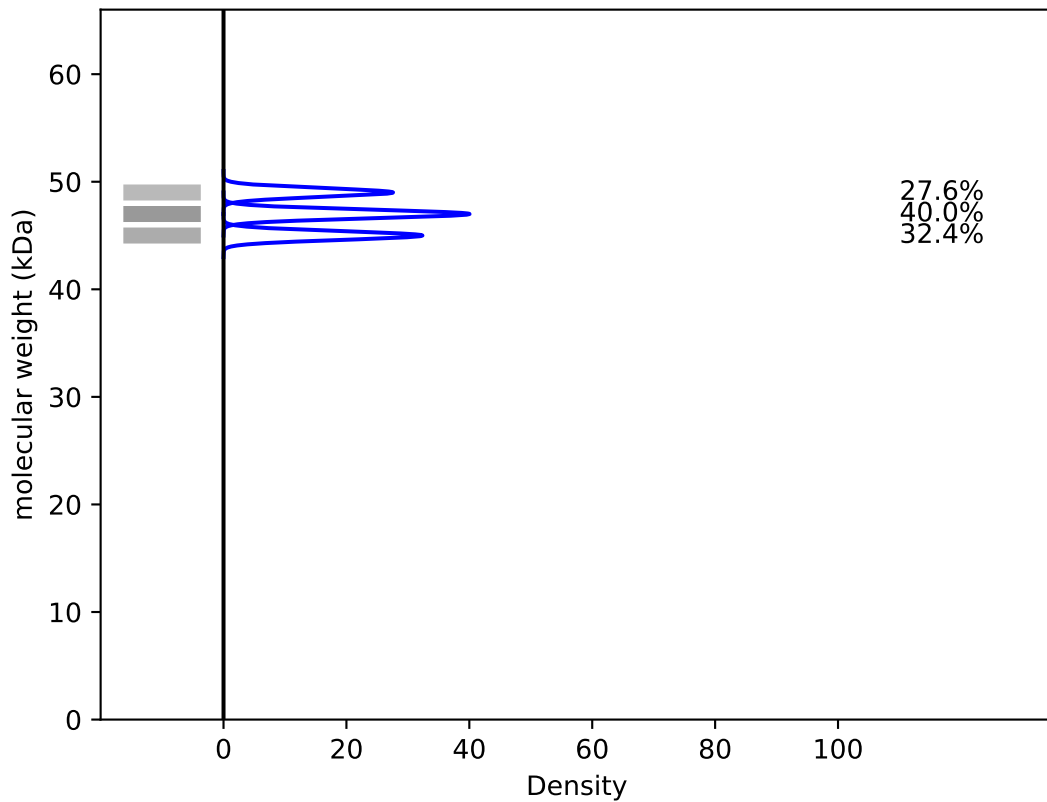

Q9Y6G5

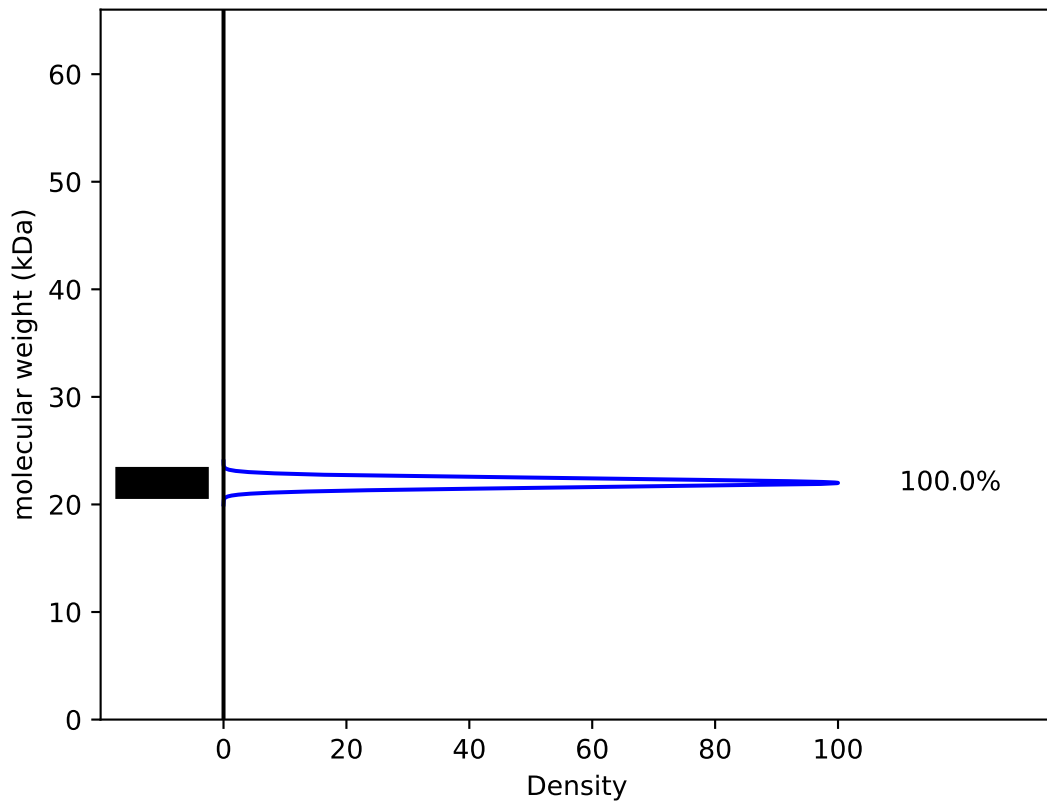

# Q9Y6I9

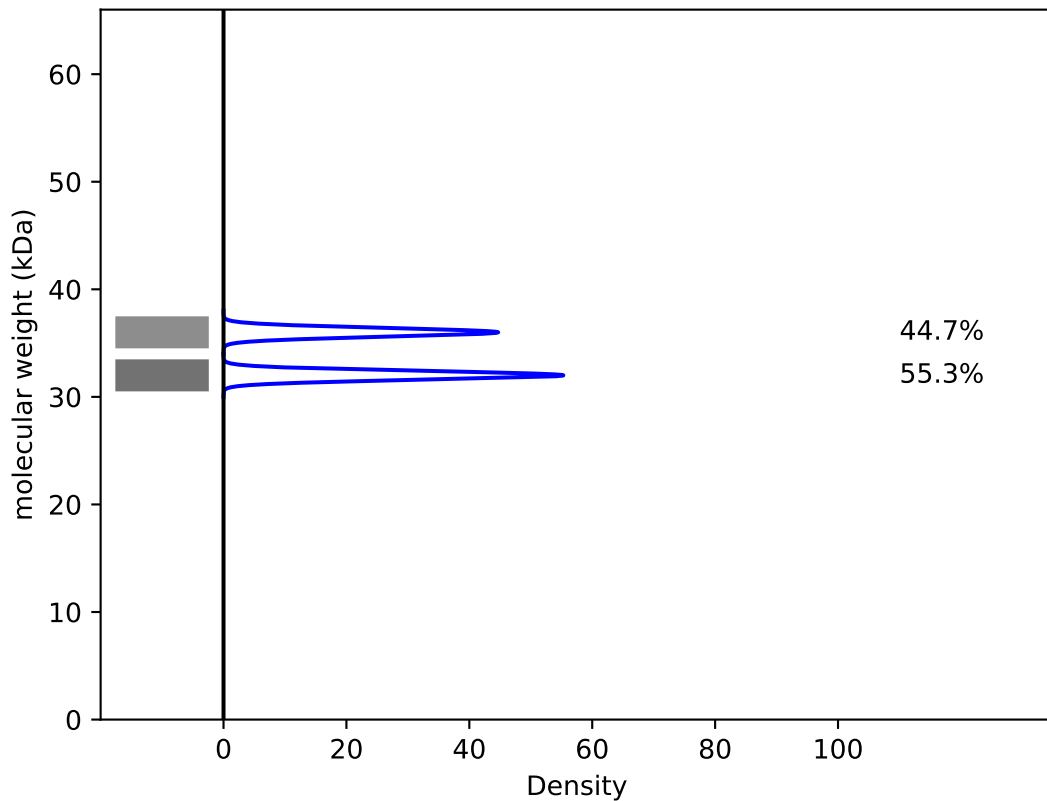

# Q9Y6M0



Q9Y6M9



Q9Y6N5



P05787

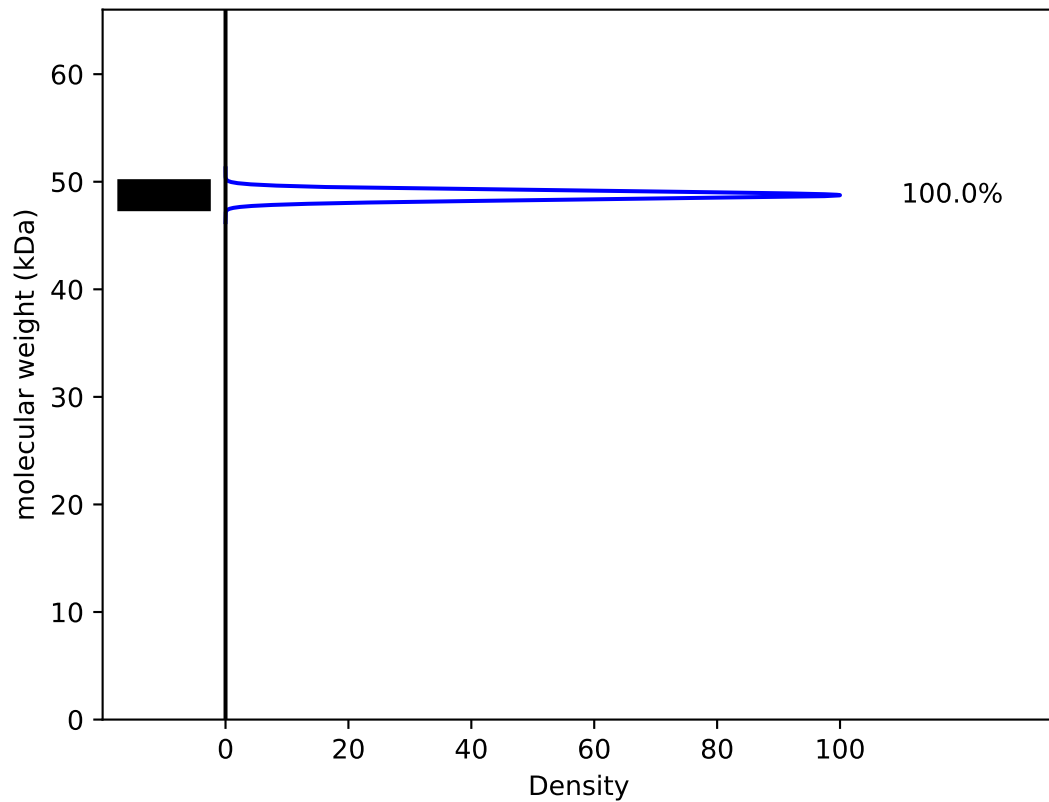



P08729



Q04695

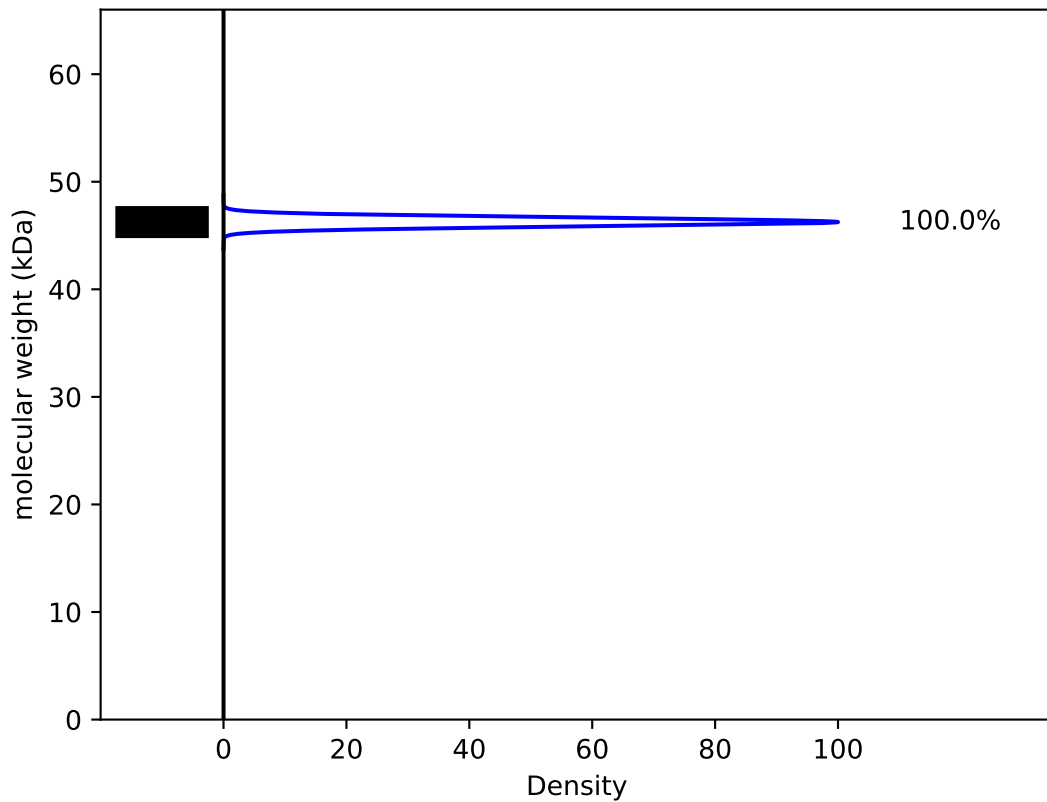

# P69892

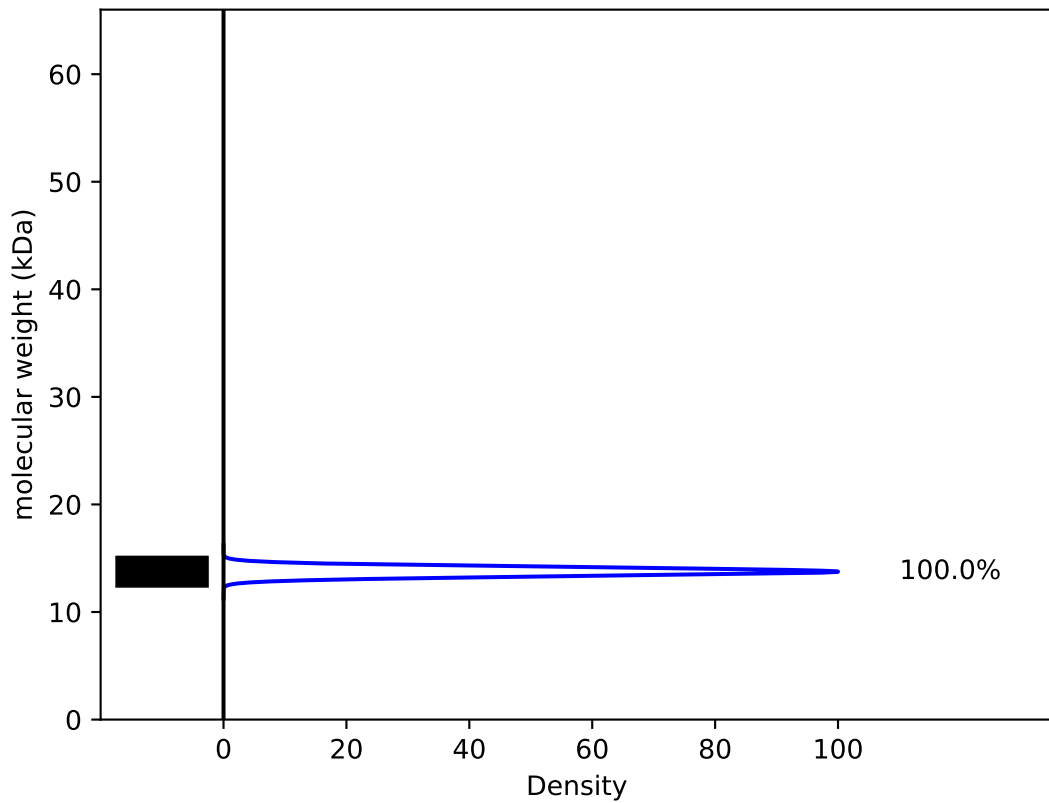

# P69891

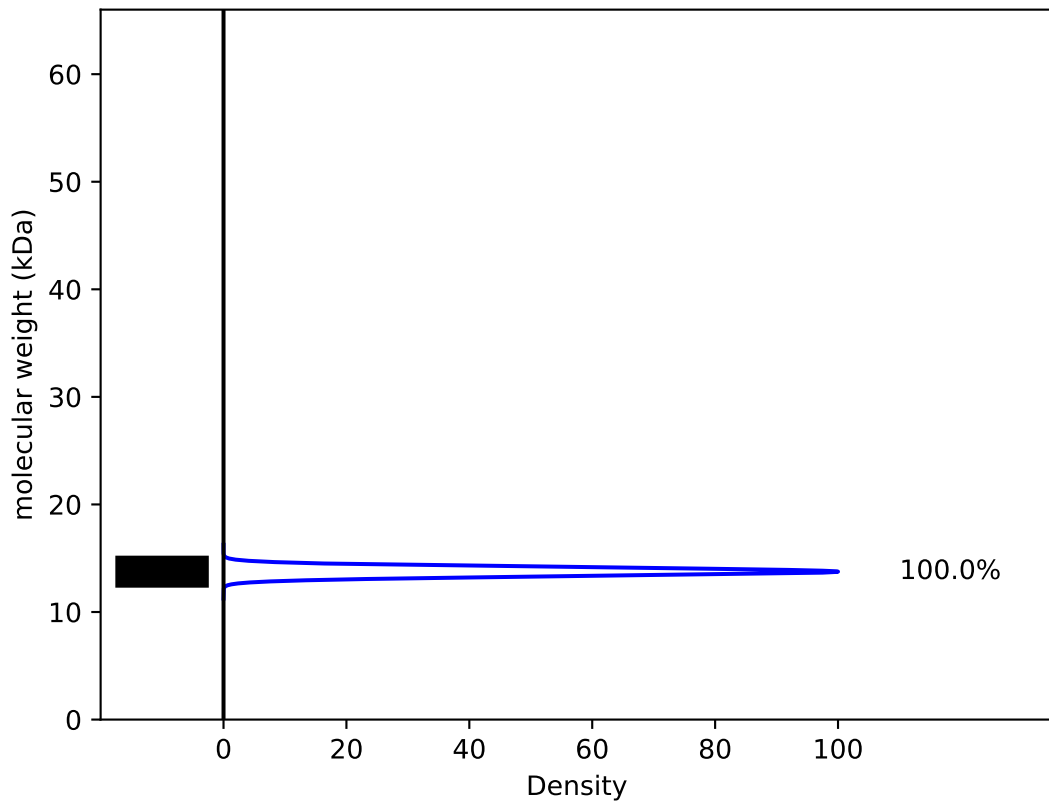

# P02100

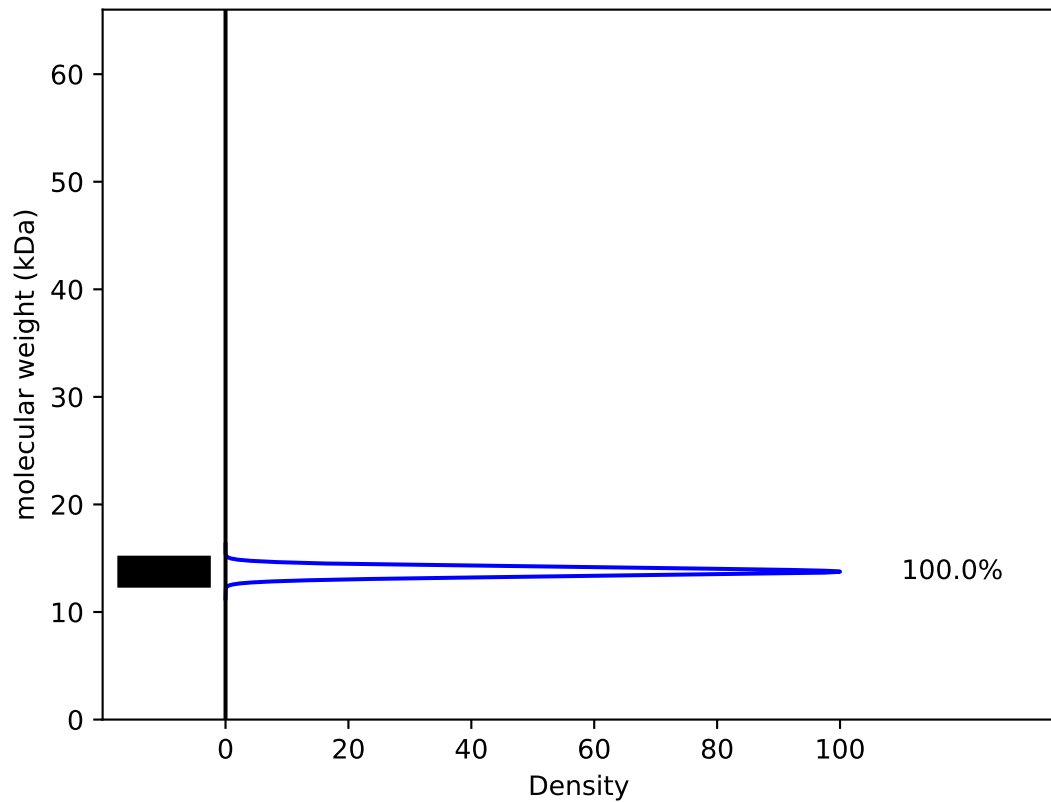

# A6NDG6

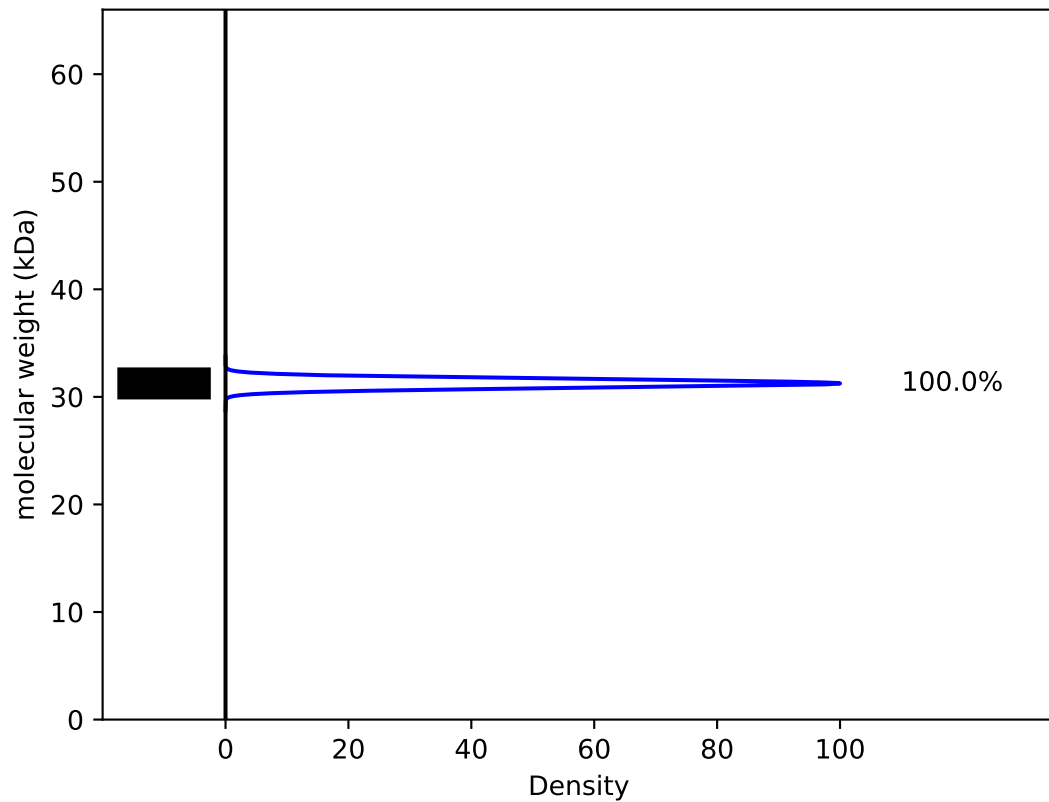

# A6NDU8

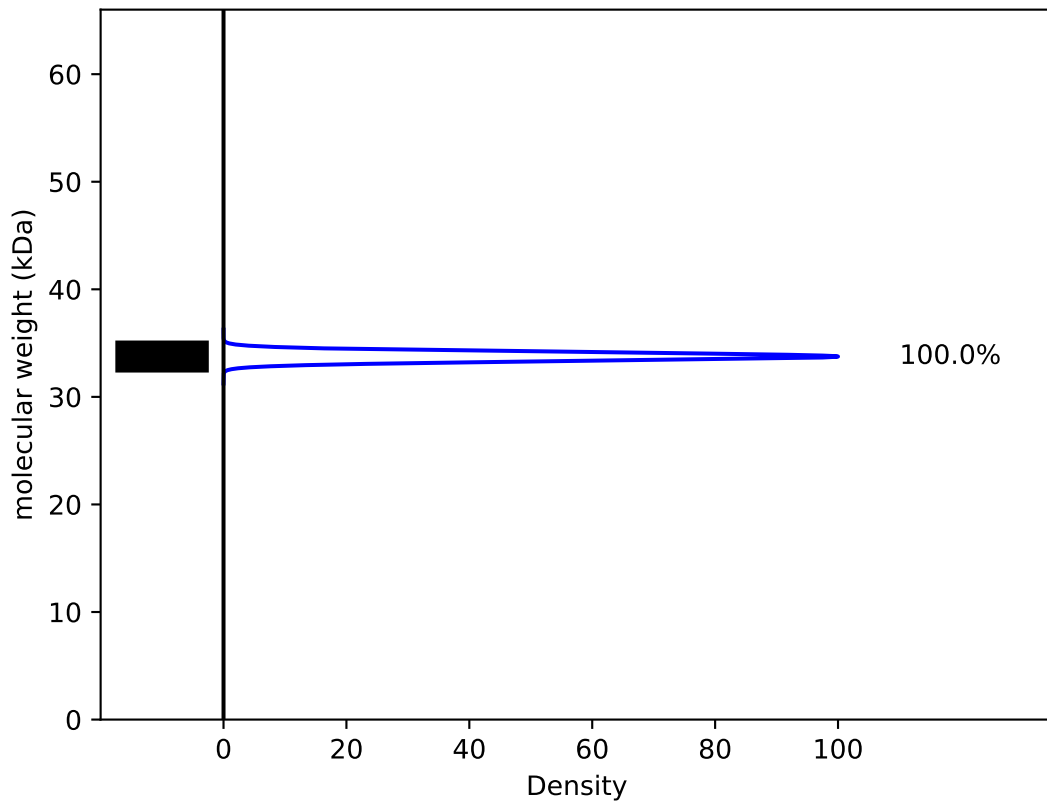

# A6NIH7

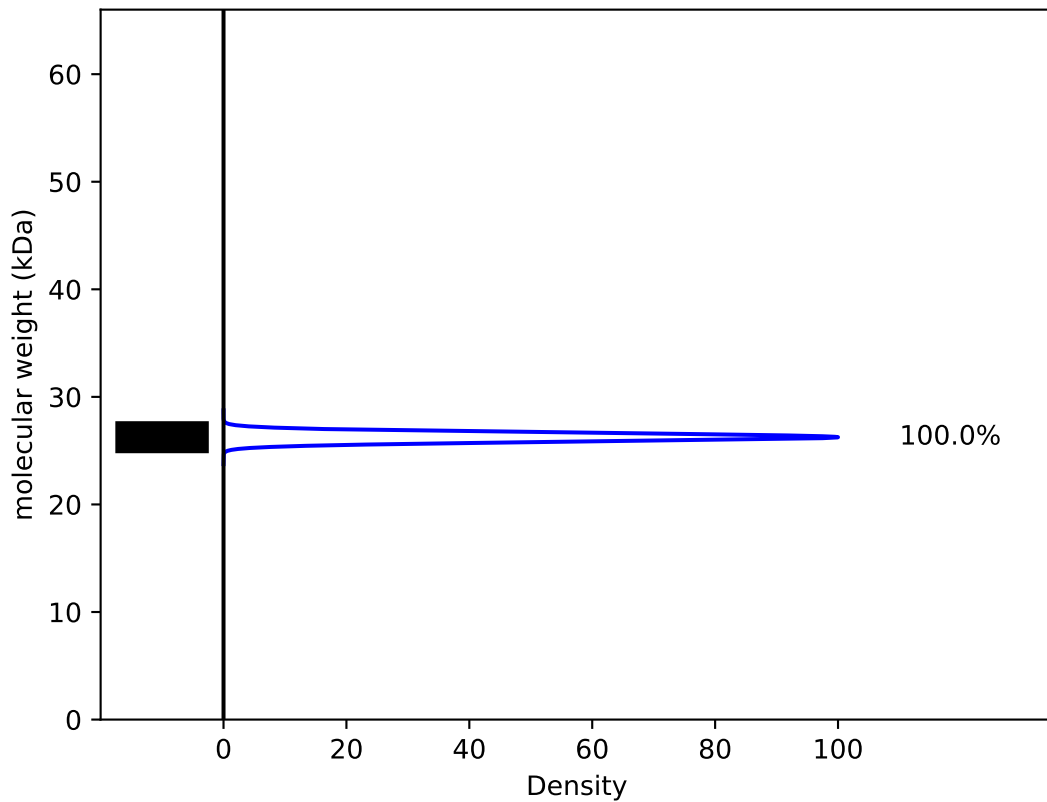



# Q13432



# A8MXV4

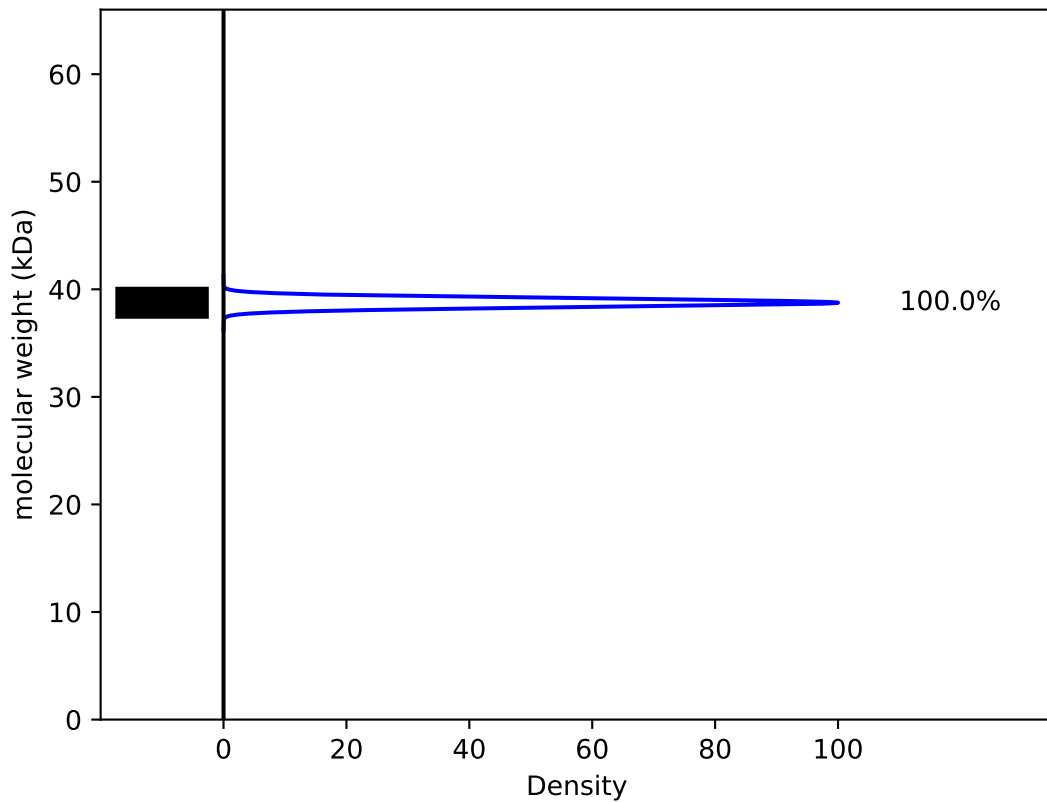

O00148

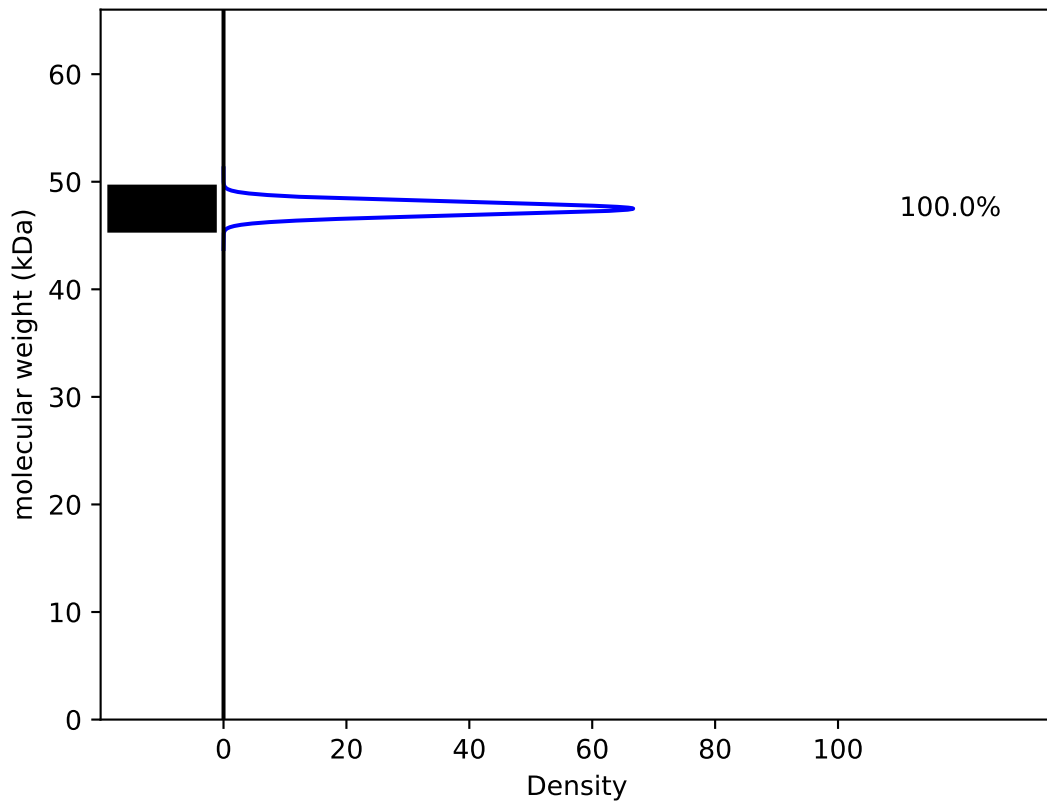

O00151



O00154



O00165

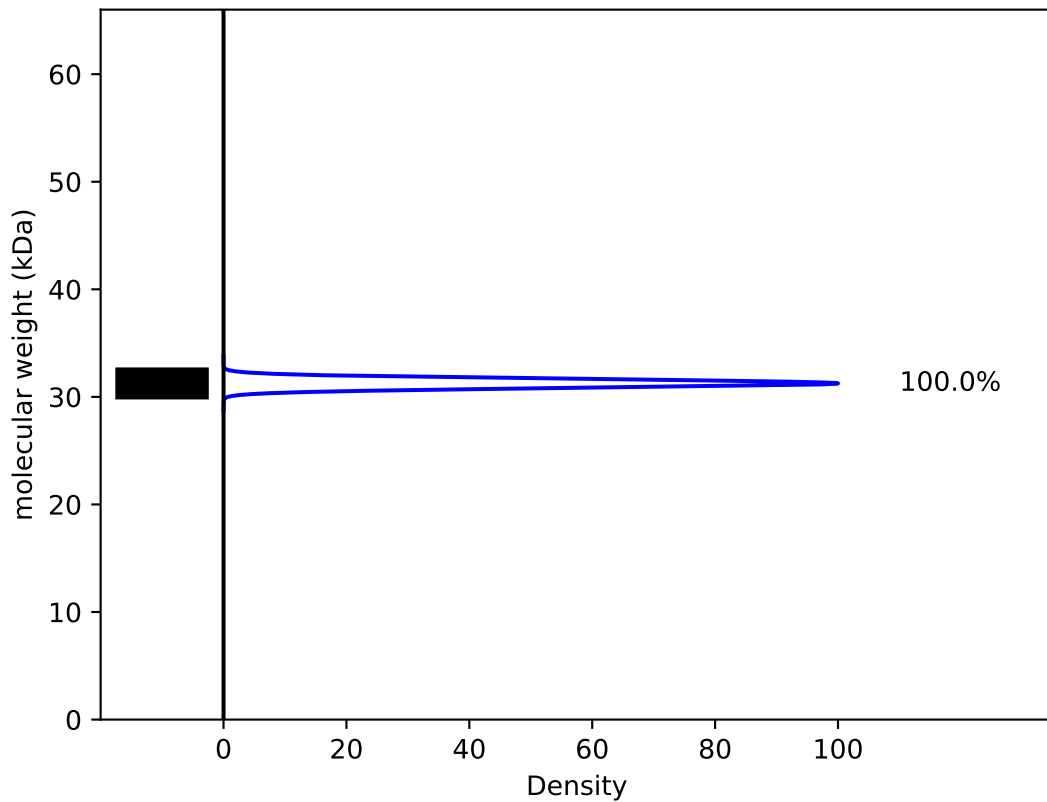

O00170



O00217

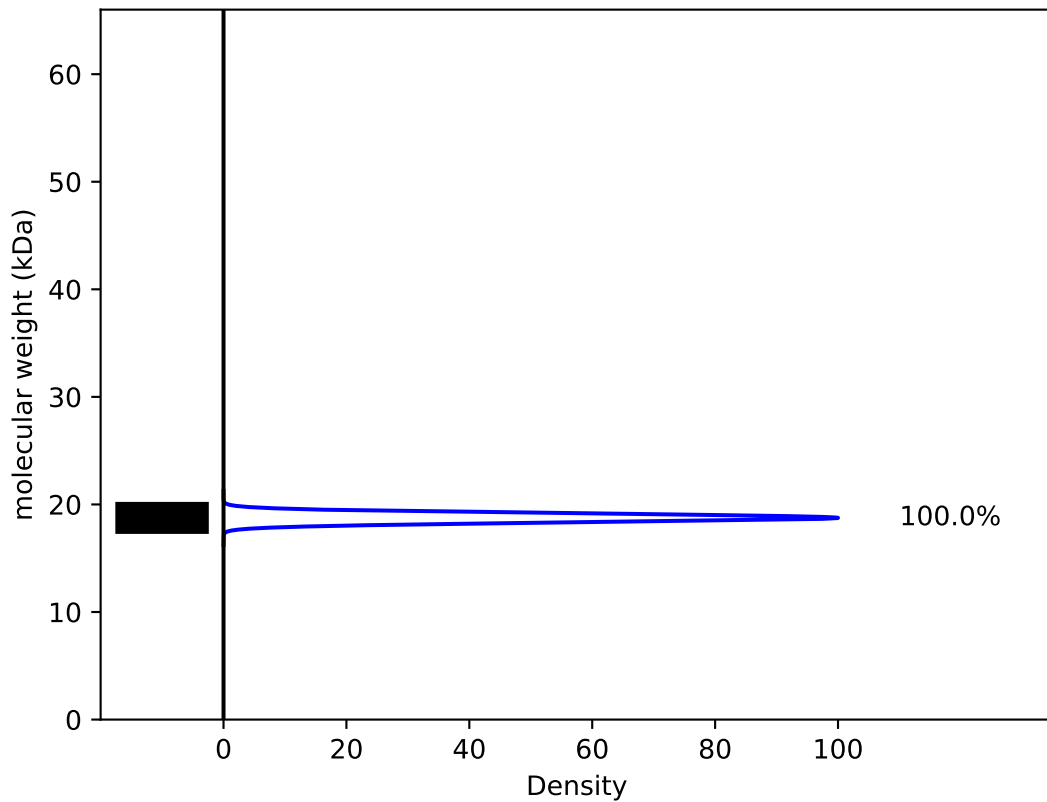



O00231

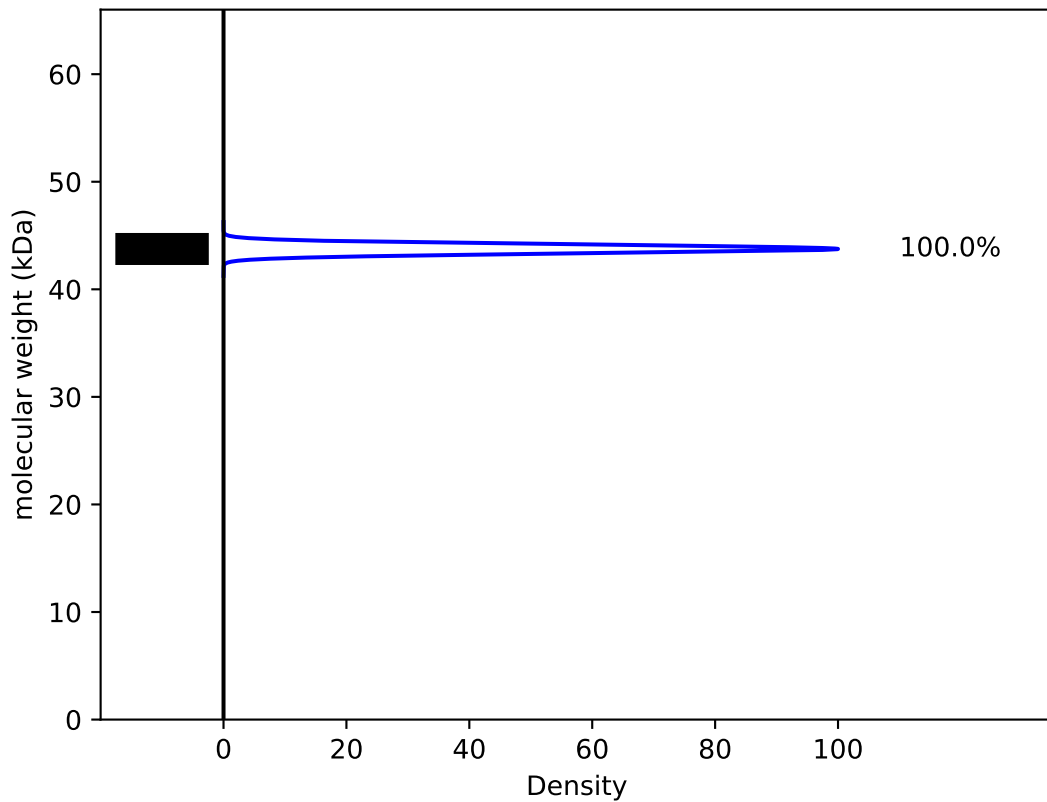

000232

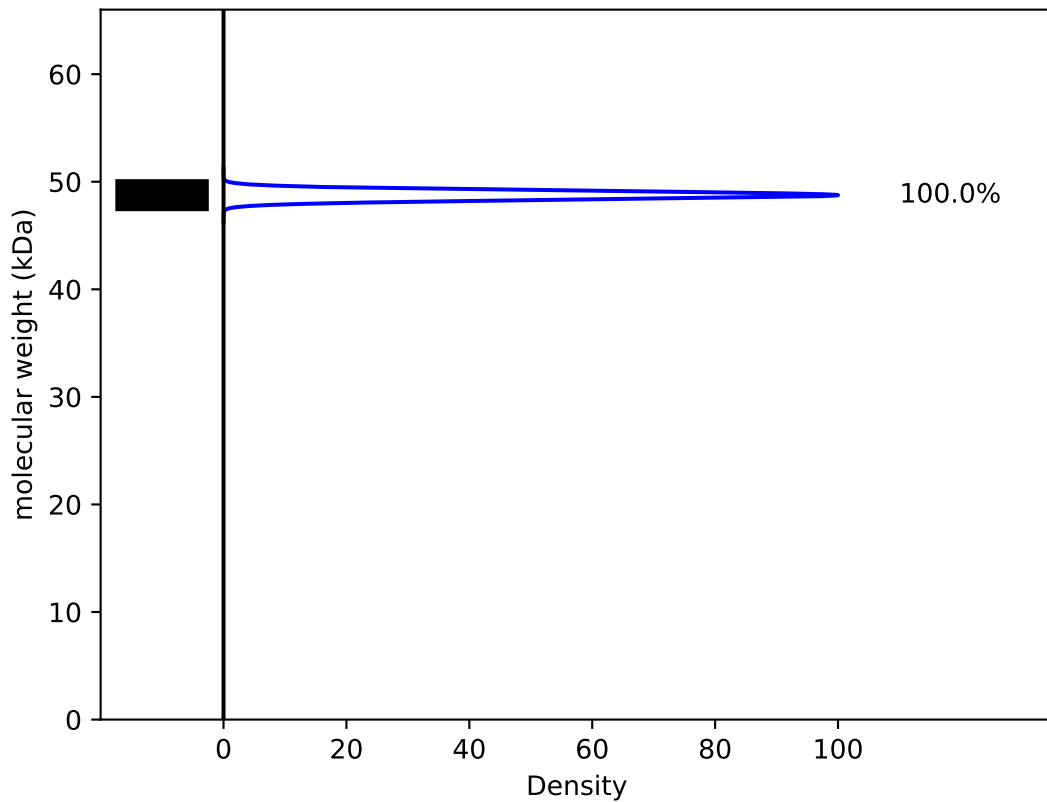

000233

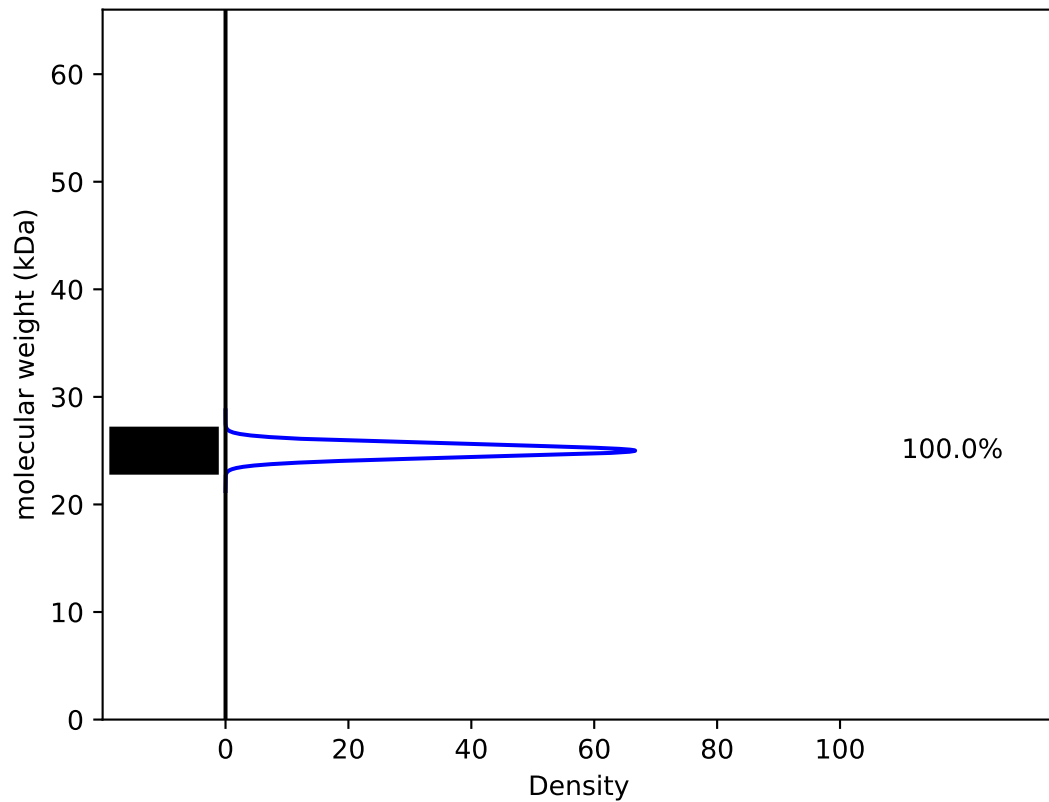

O00264

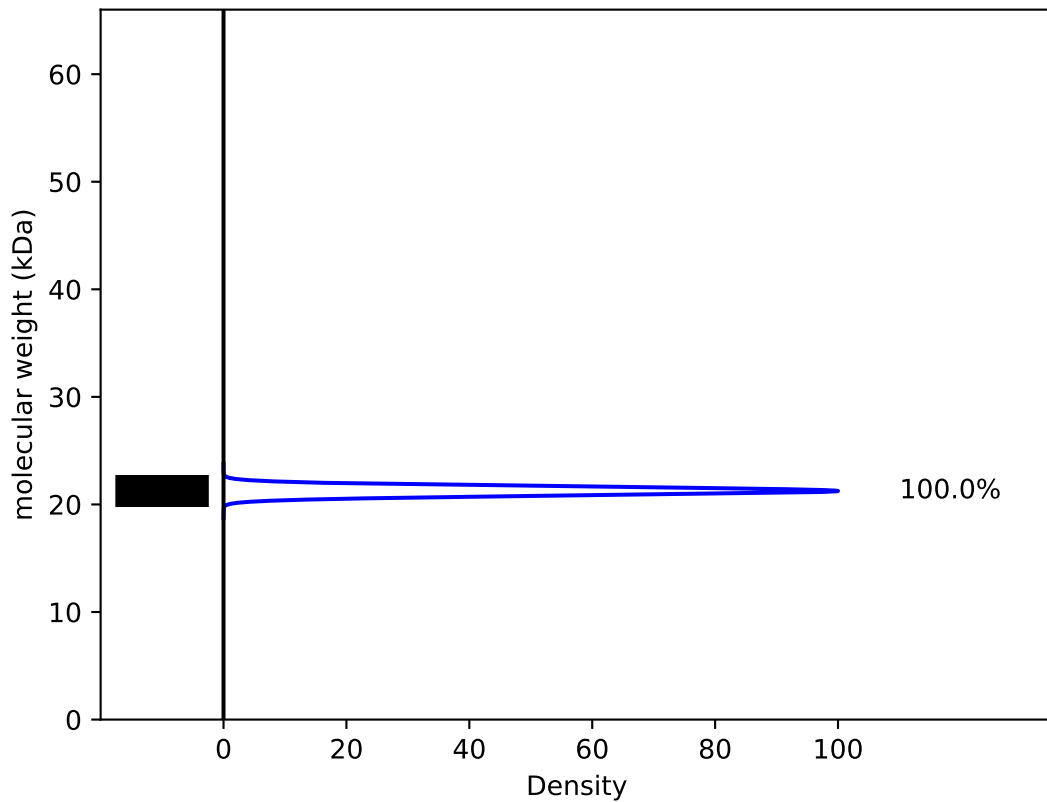

000273

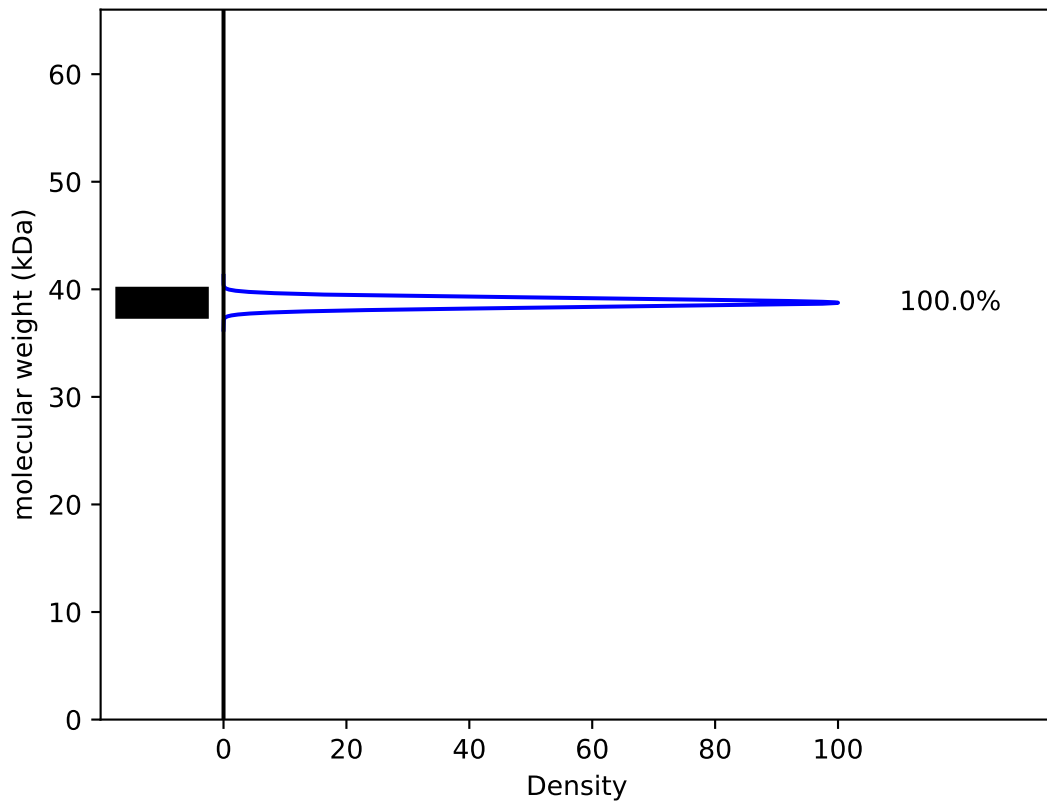

O00299



O00303



O00422

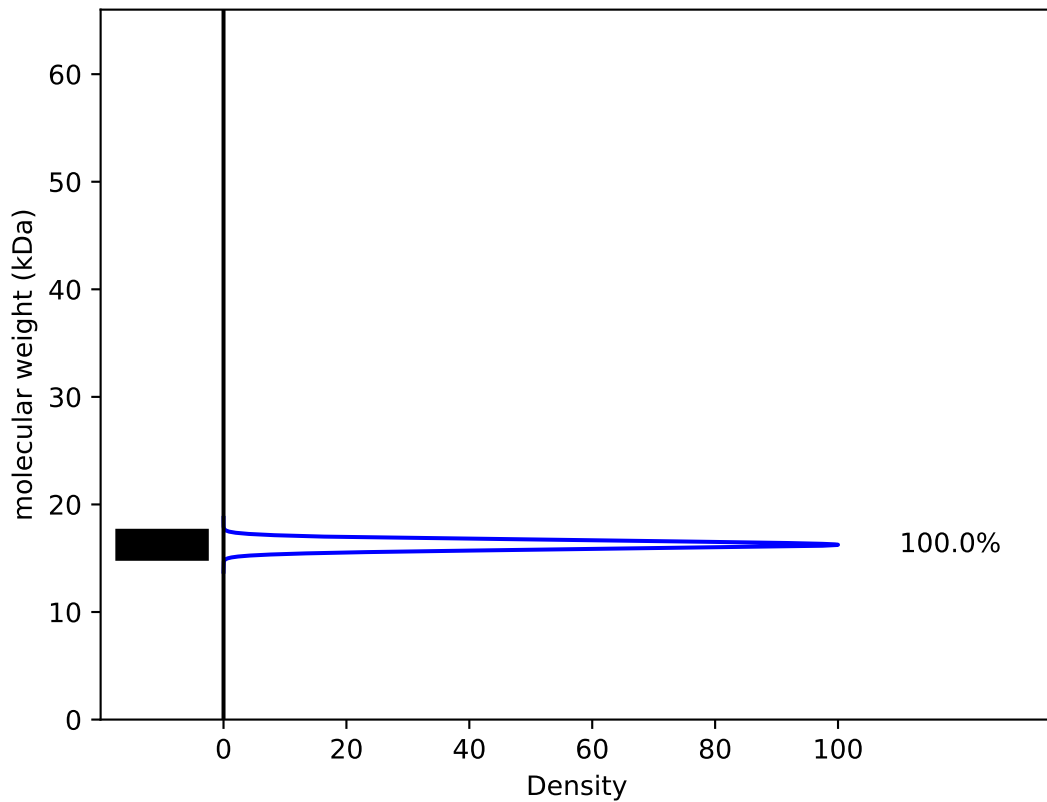



O00442

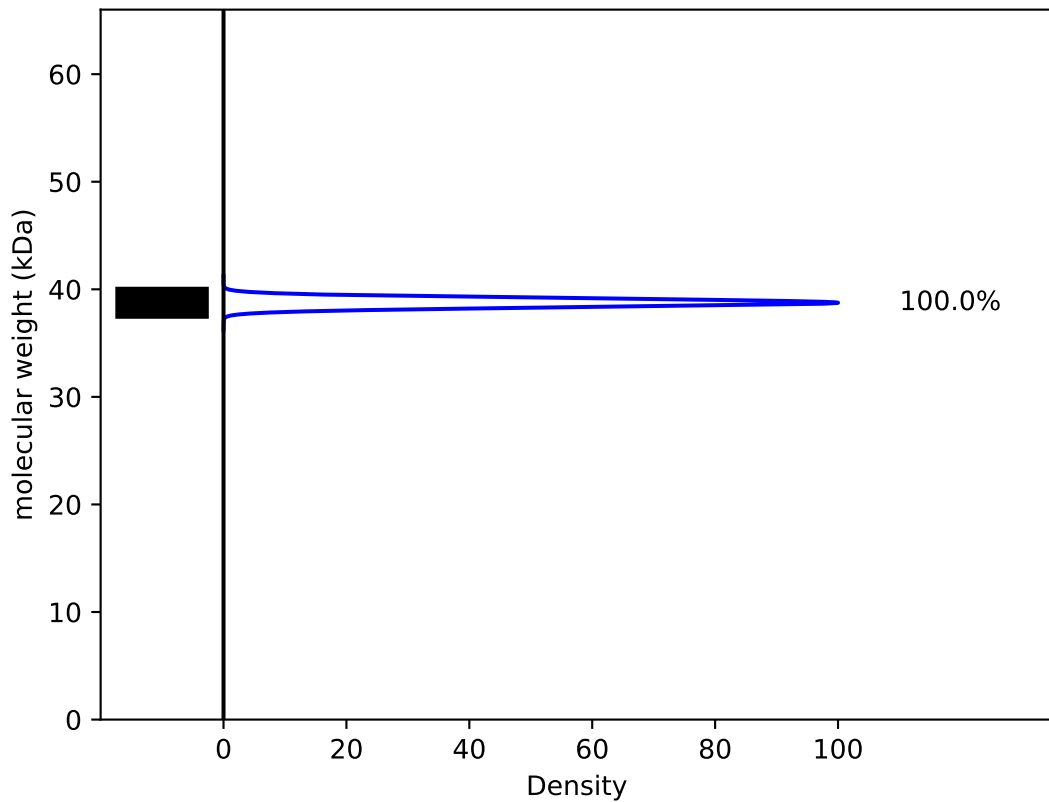

O00483

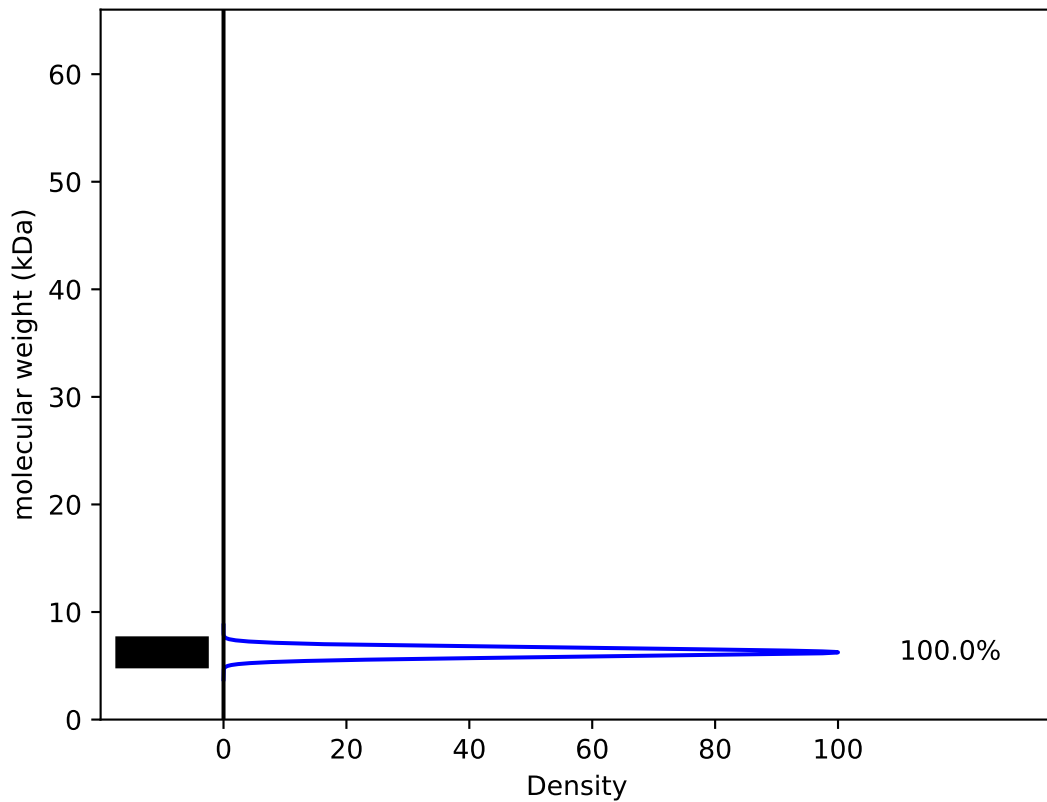

O00487

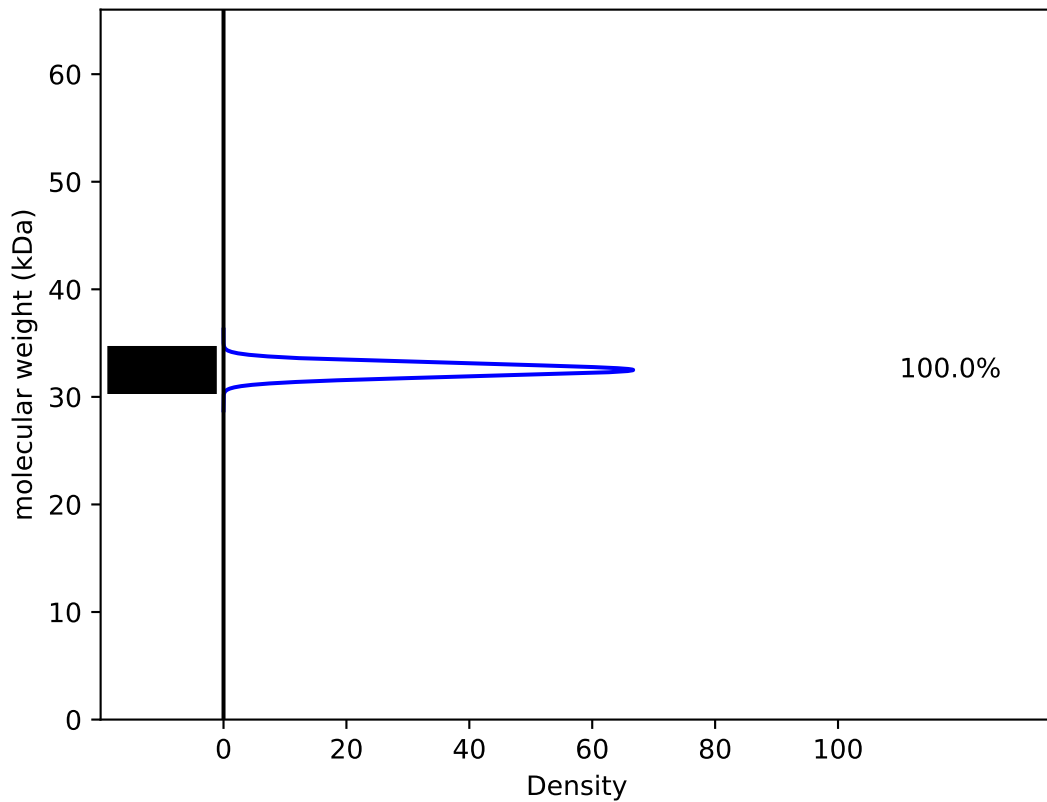

O00505

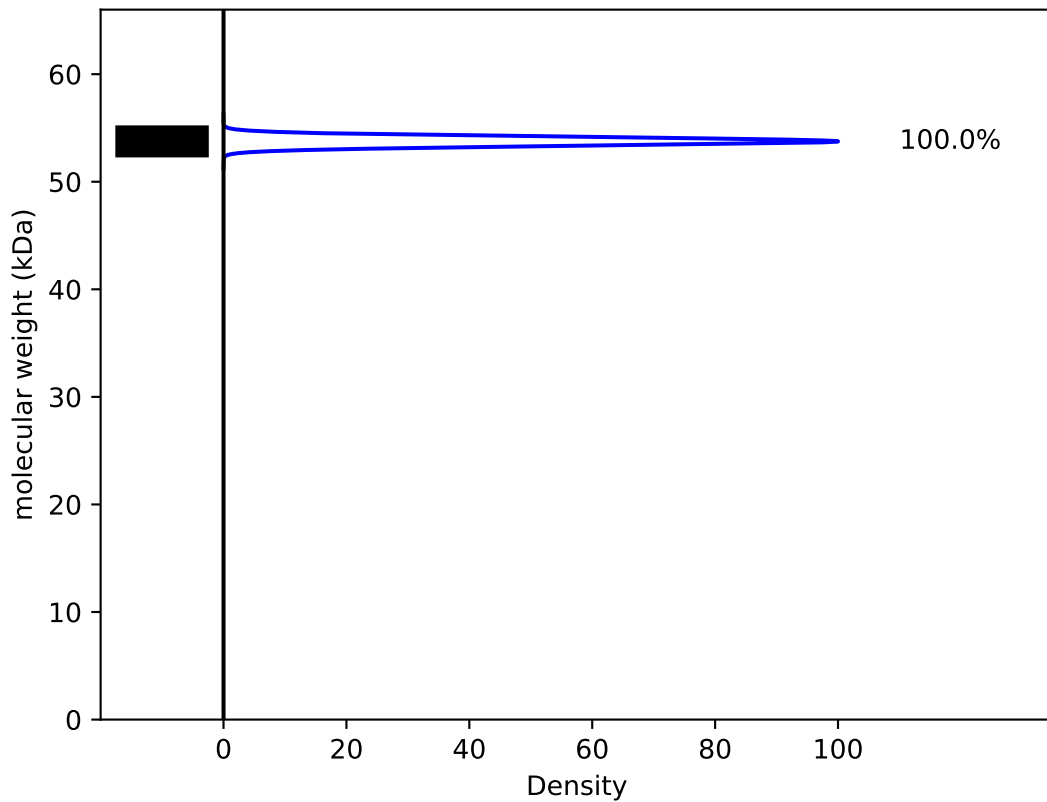

O00560

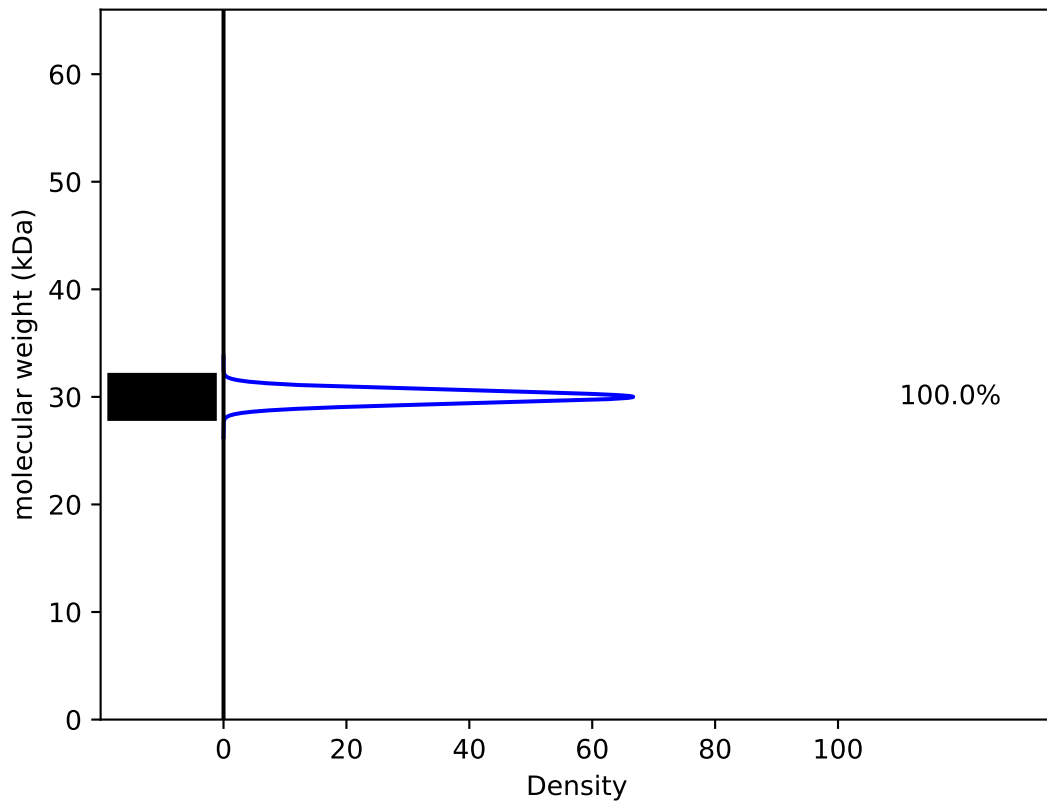

O00629



O00743



O00762

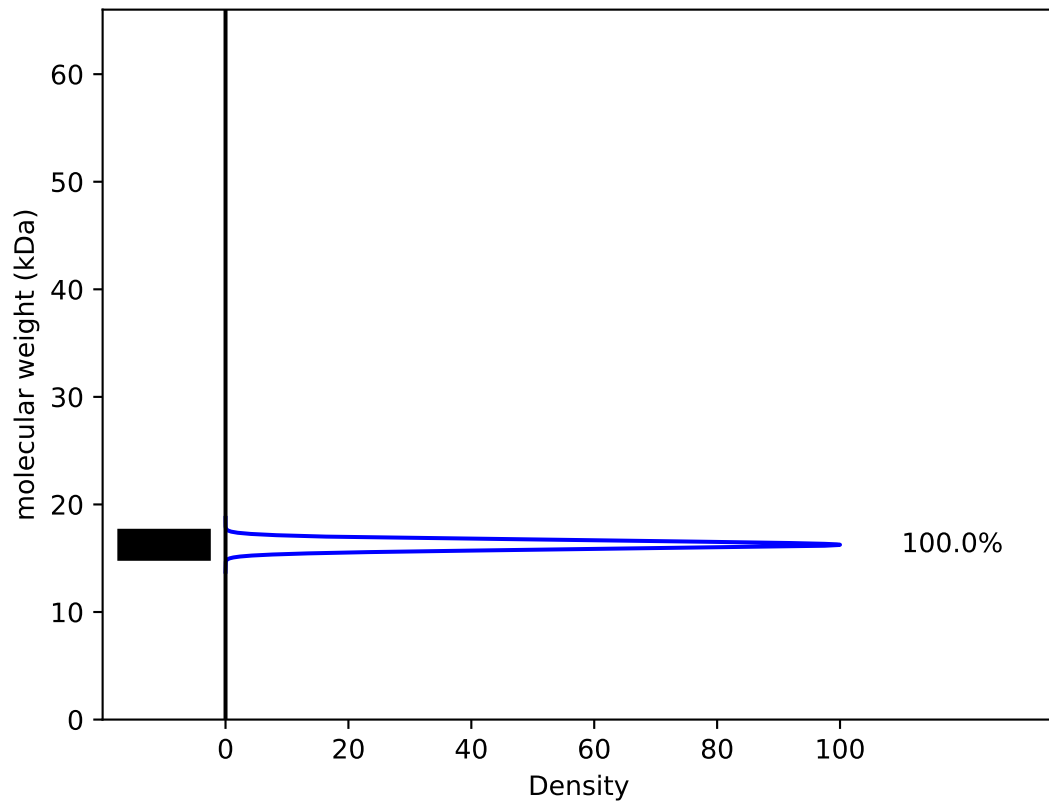



O00764

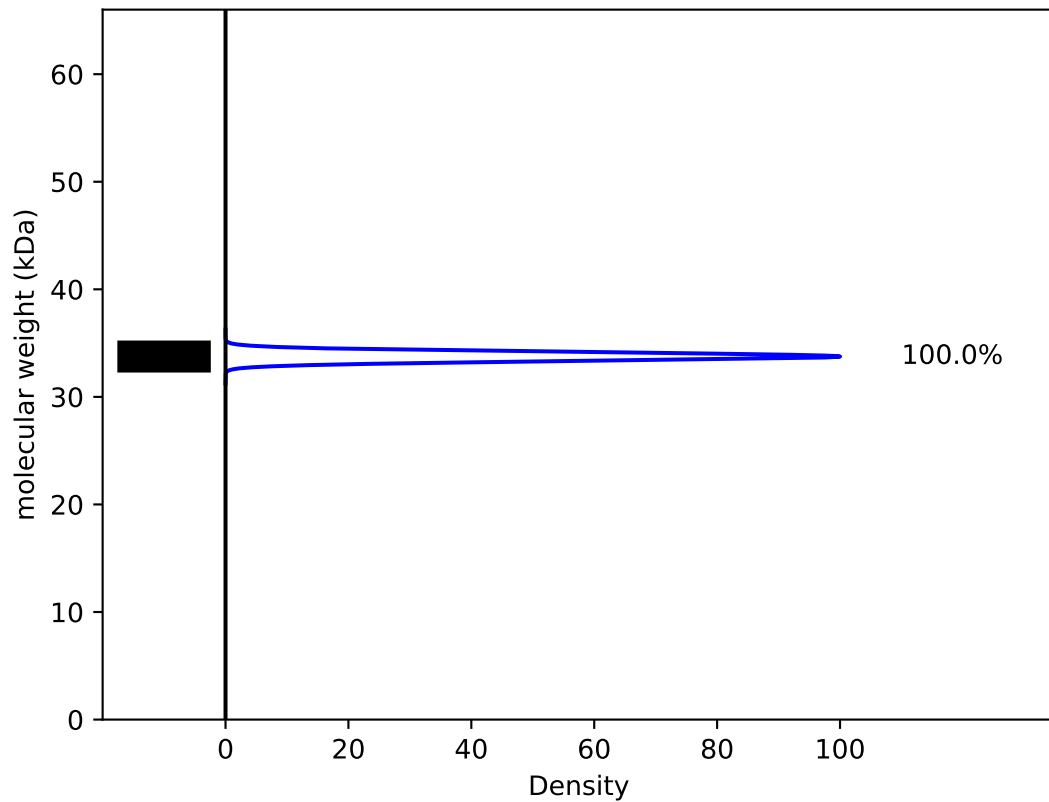

O14530



# P47813



O14602

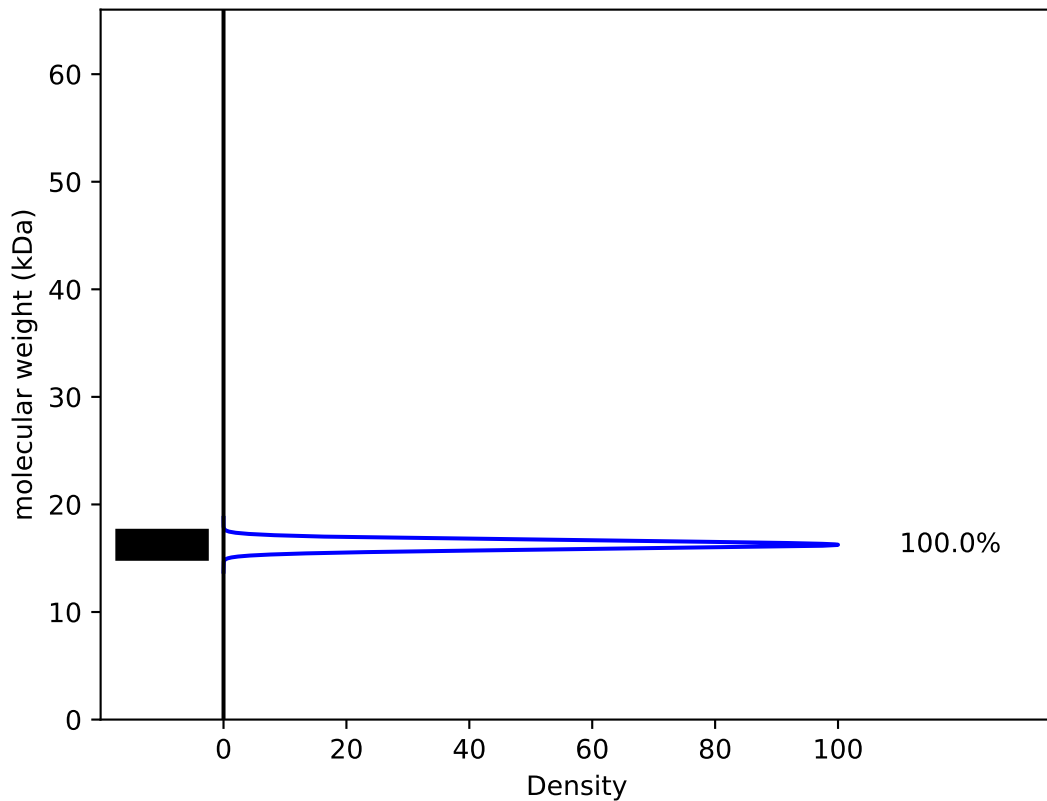

O14656



O14657

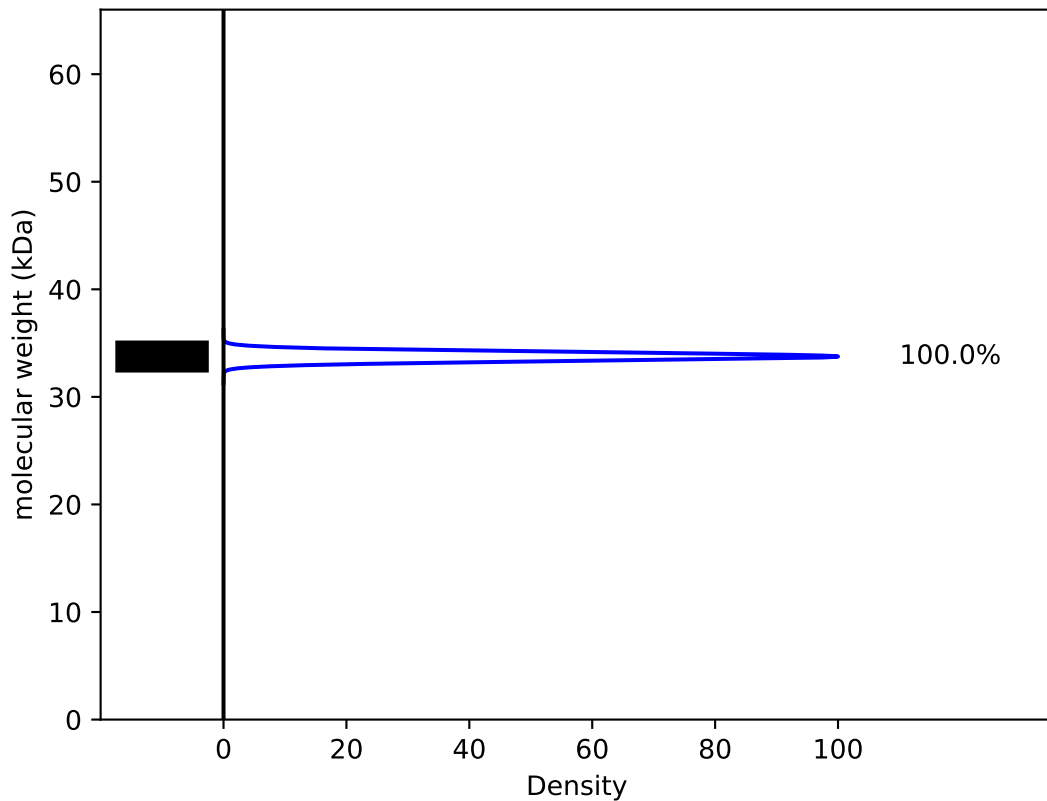

O14737

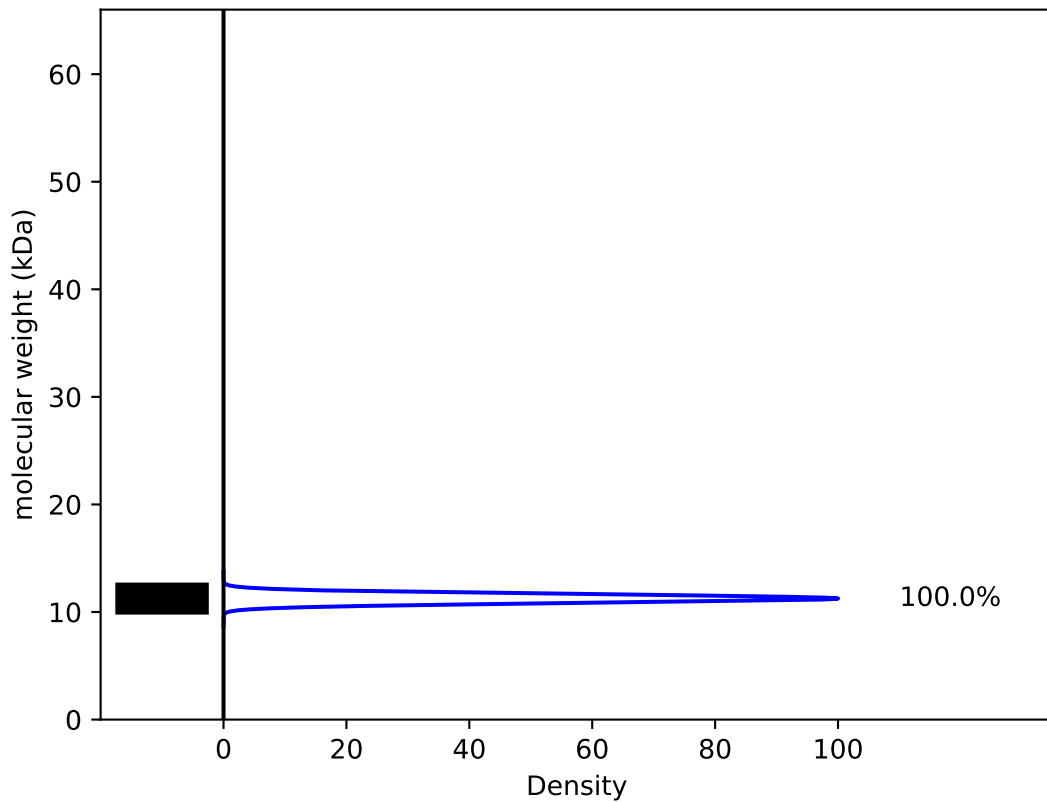

O14745

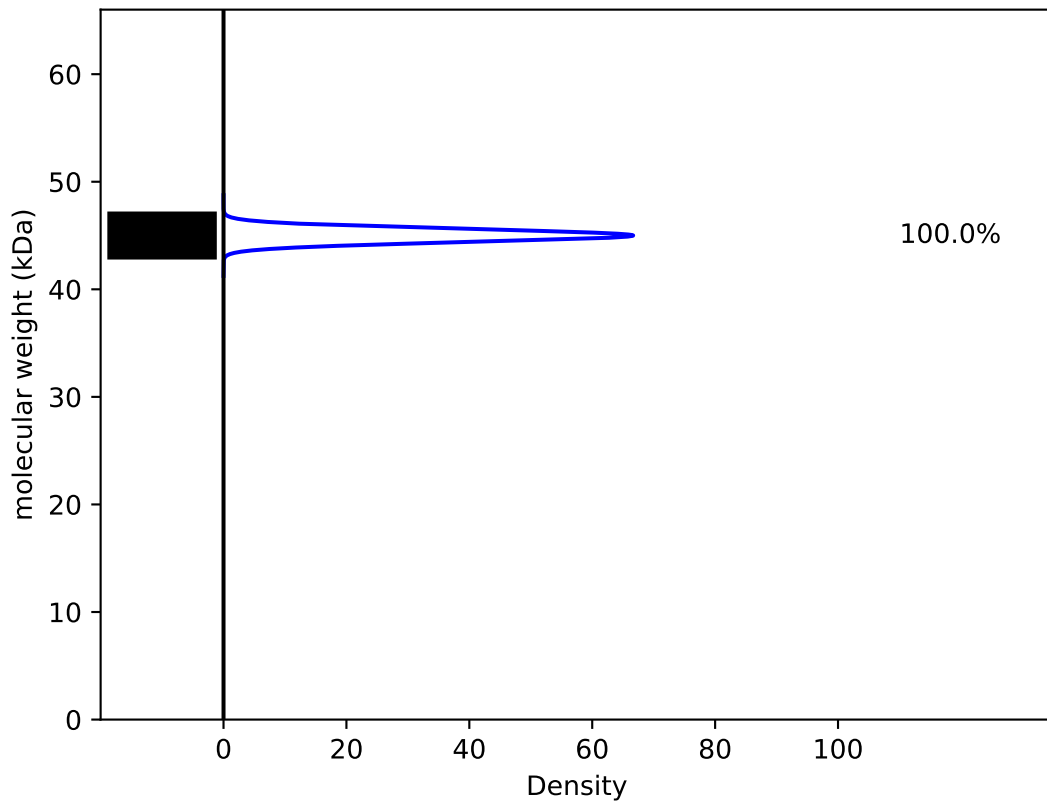



O14818

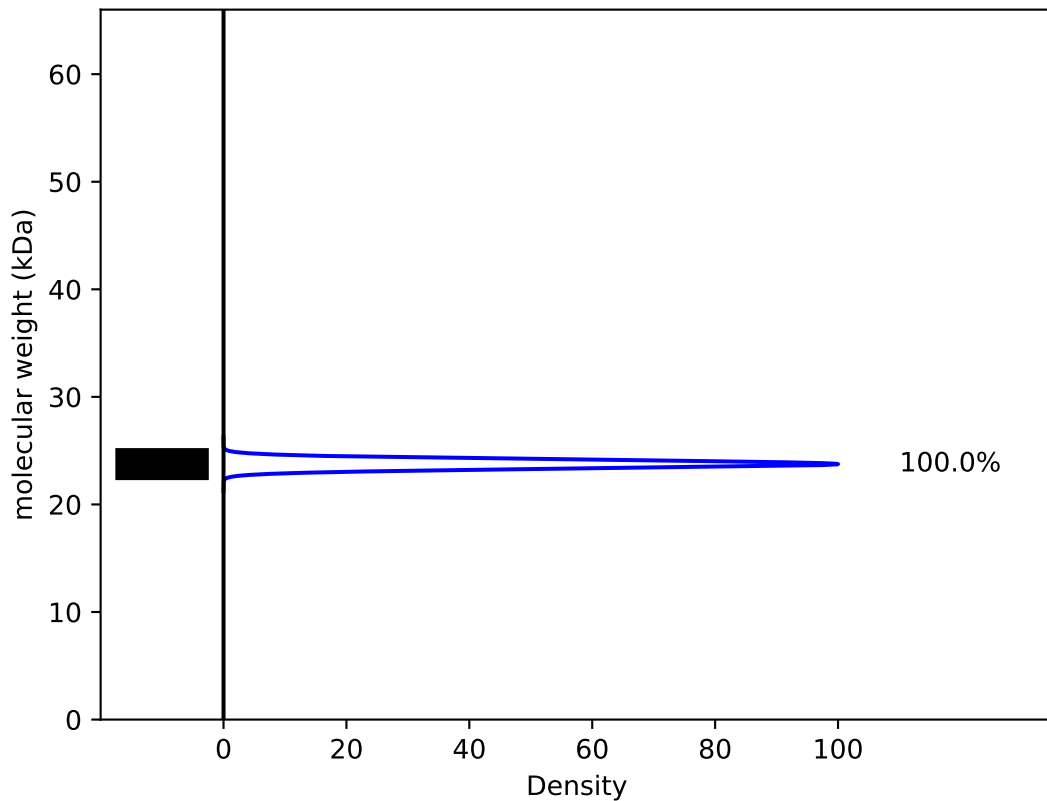

# Q8TAA3

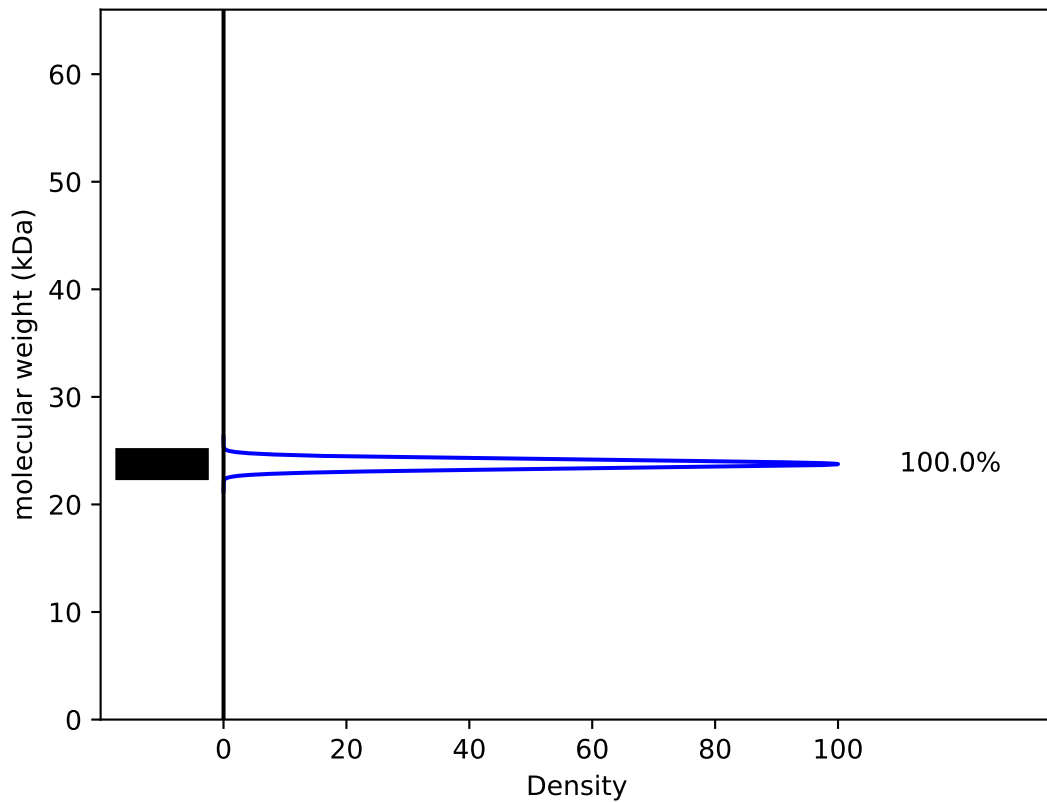

O14828



O14879

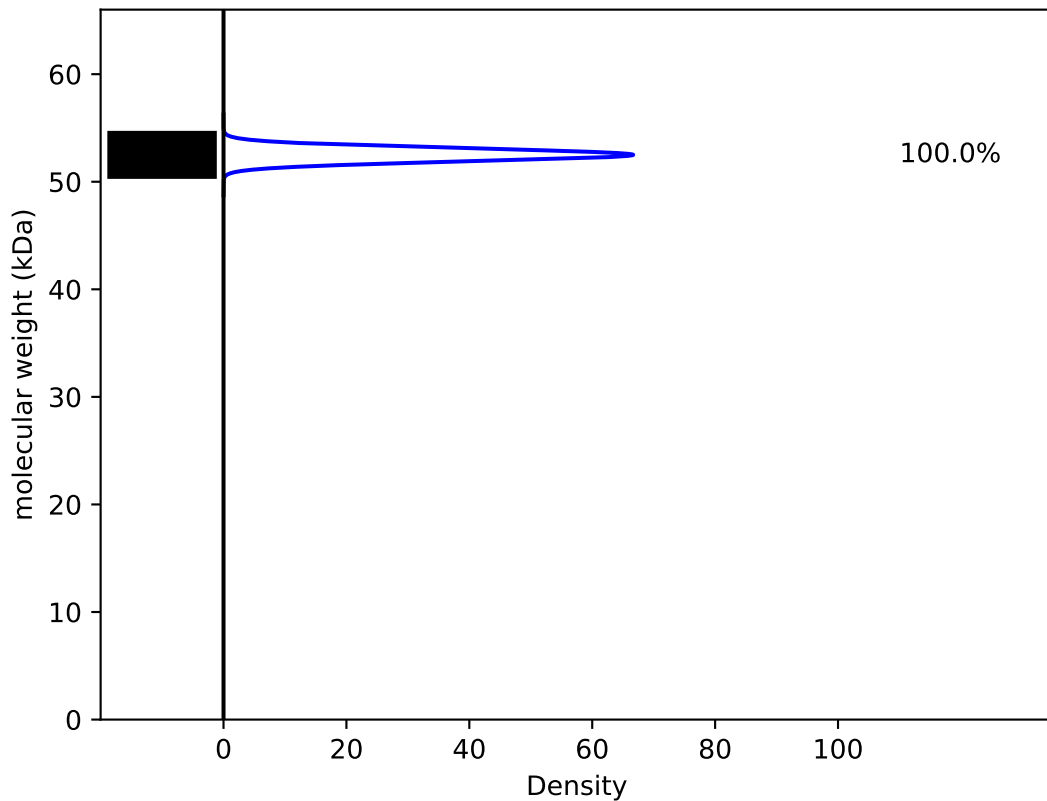

O14880



O14908

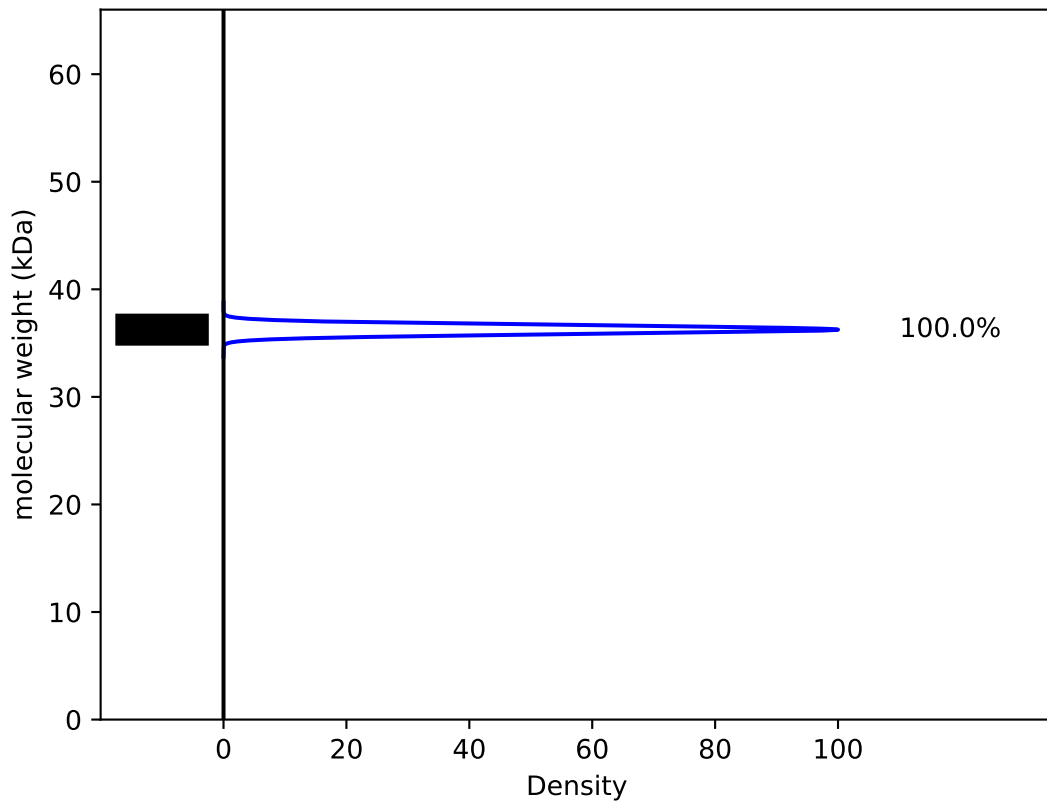

O14933



O14949

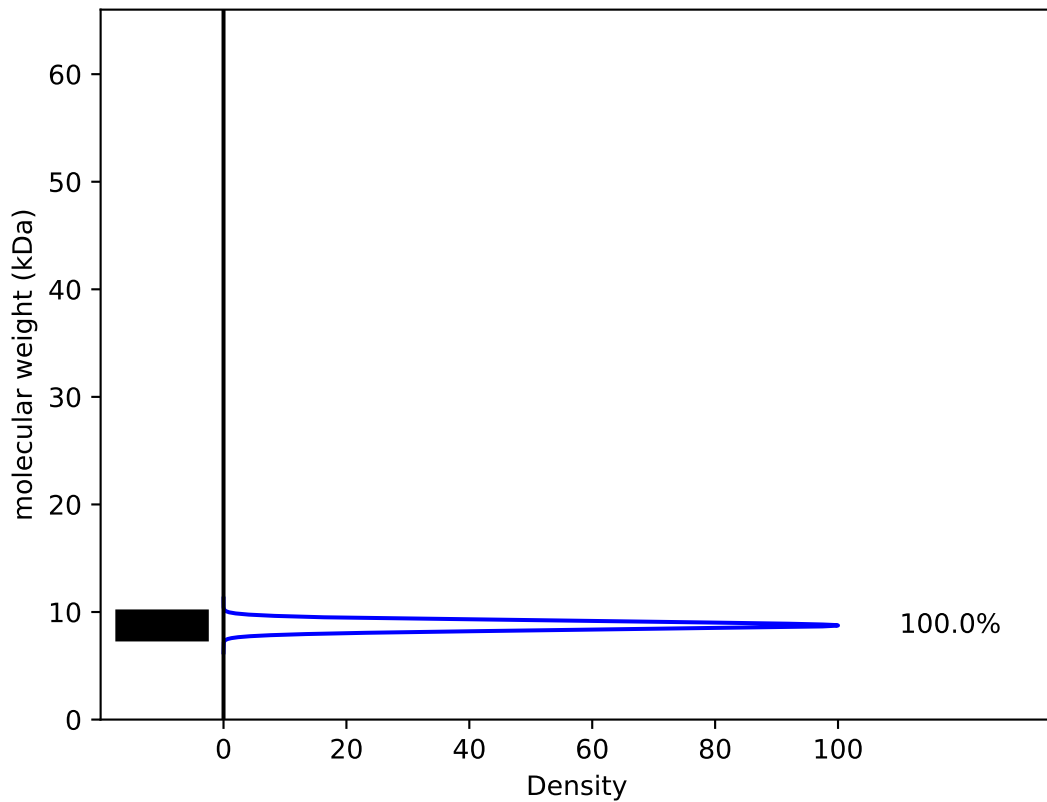



# P19105

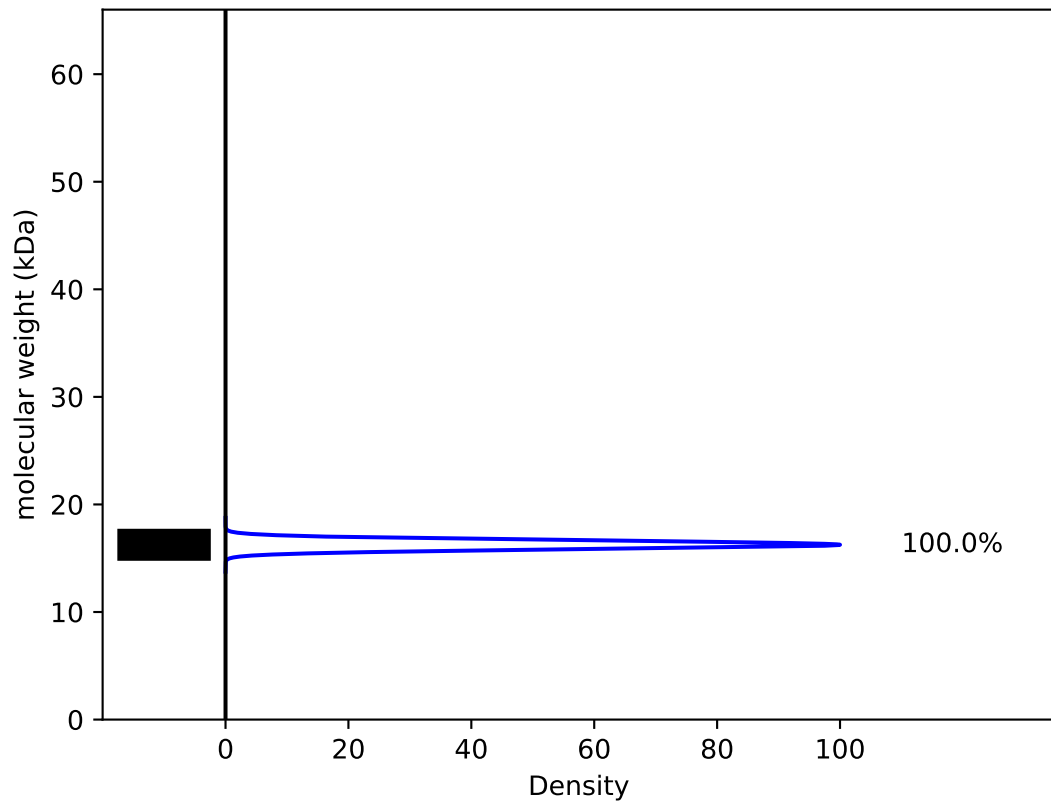

O14950



P24844



O14966



# O15116



# O15145

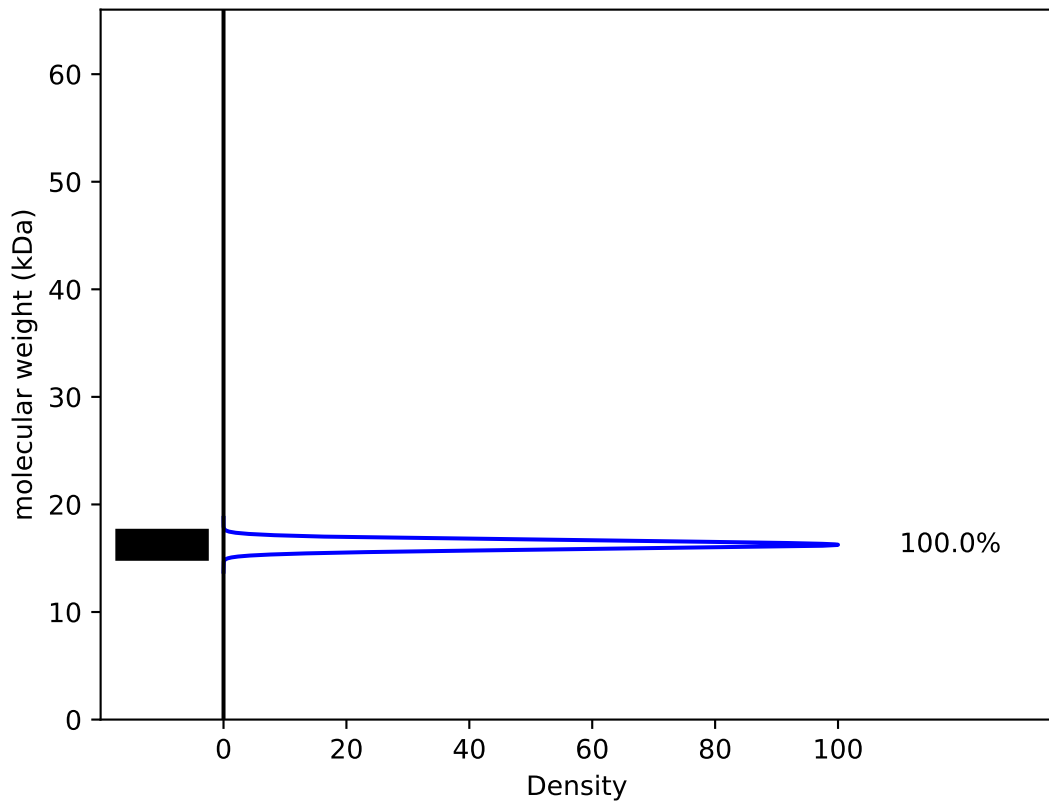

# O15160



O15173





# O15269



O15347



O15372

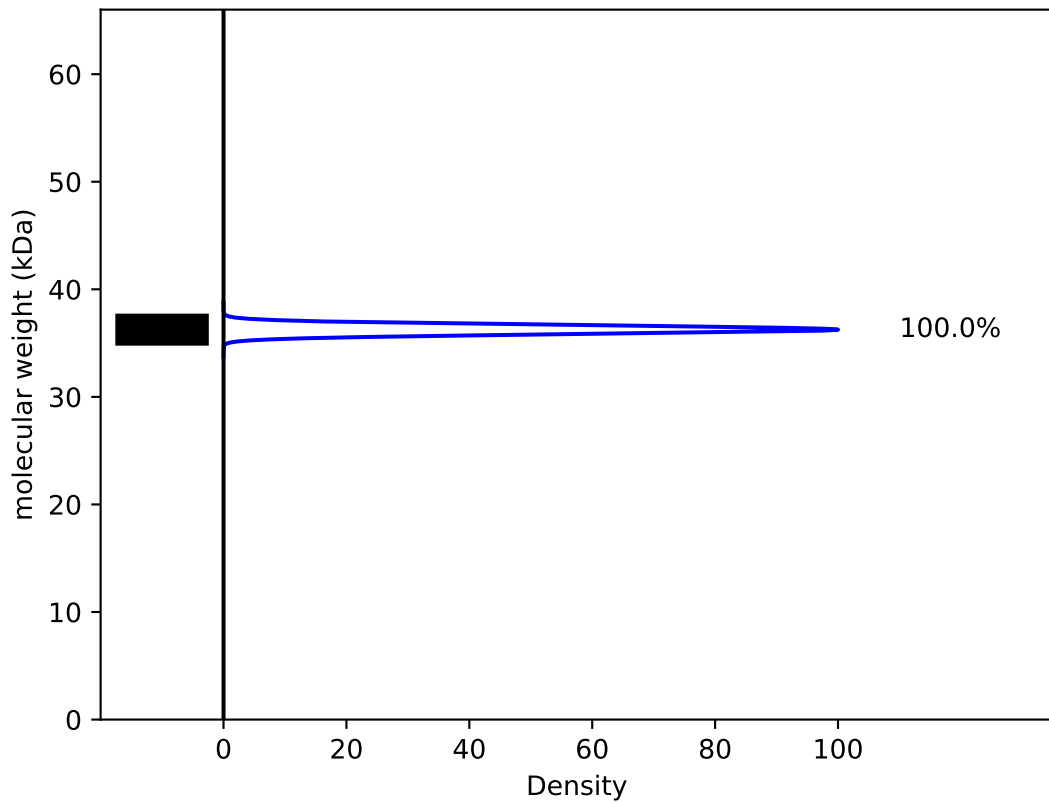

O15392



# O15400



# O15460

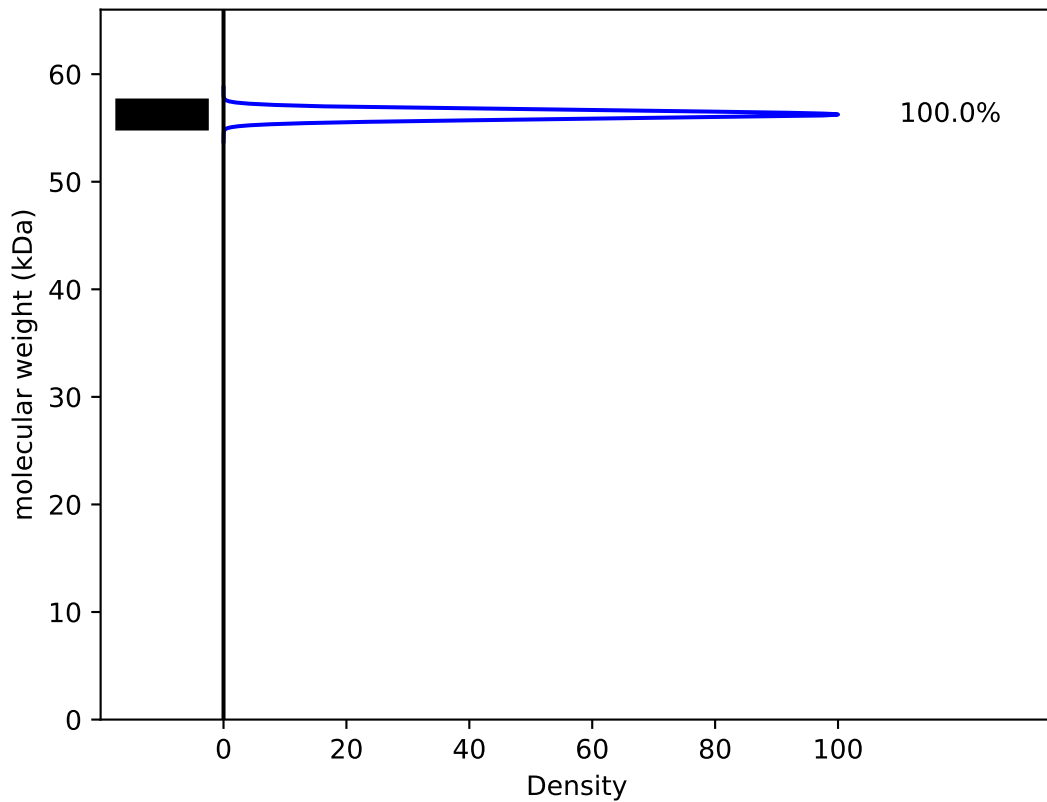

# O15498



# O15511





O43148



O43169

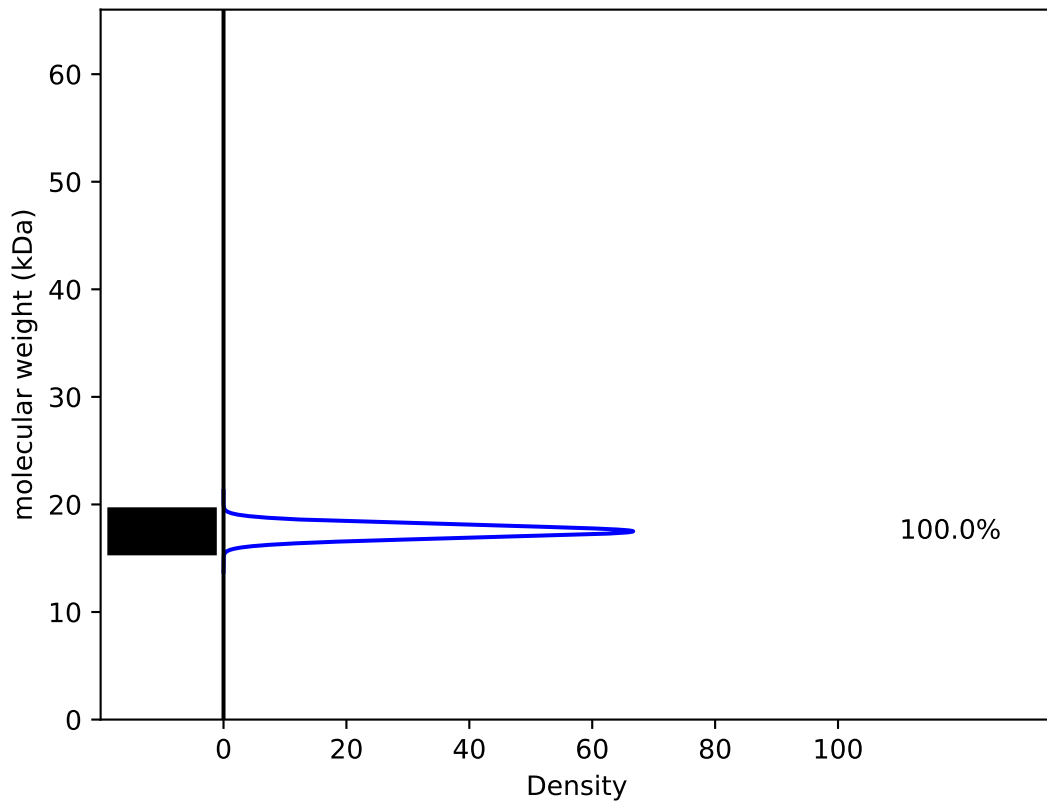

O43172

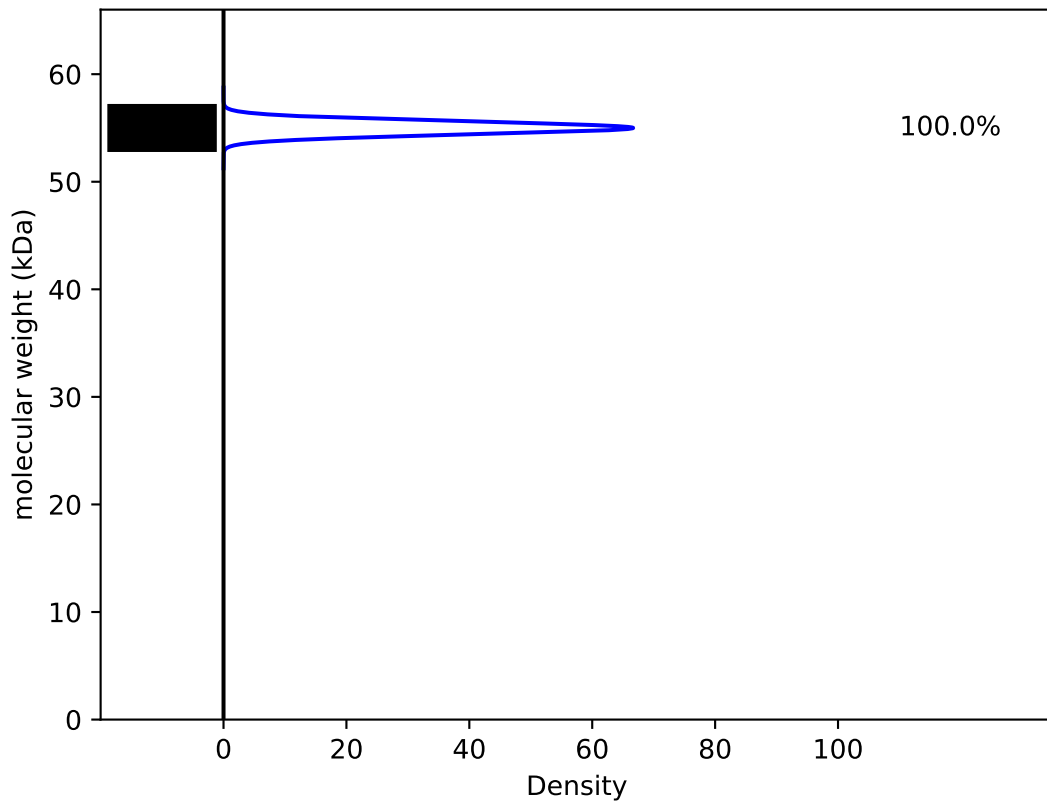

O43181



O43237

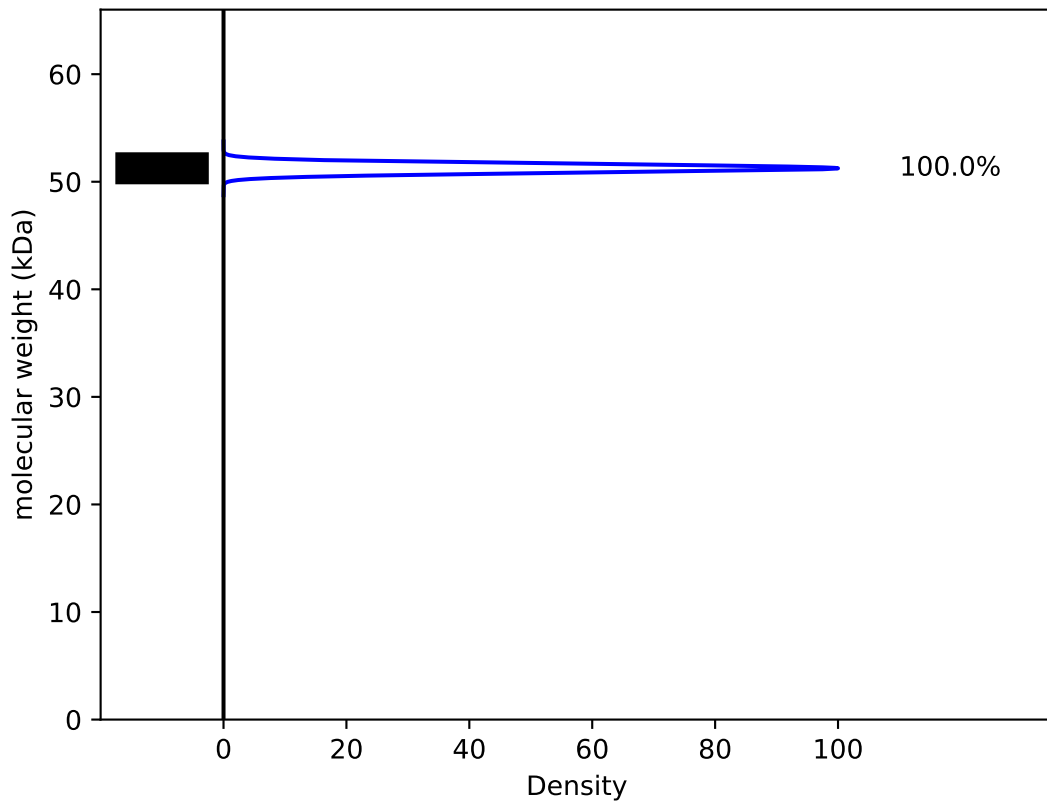

O43324



O43396

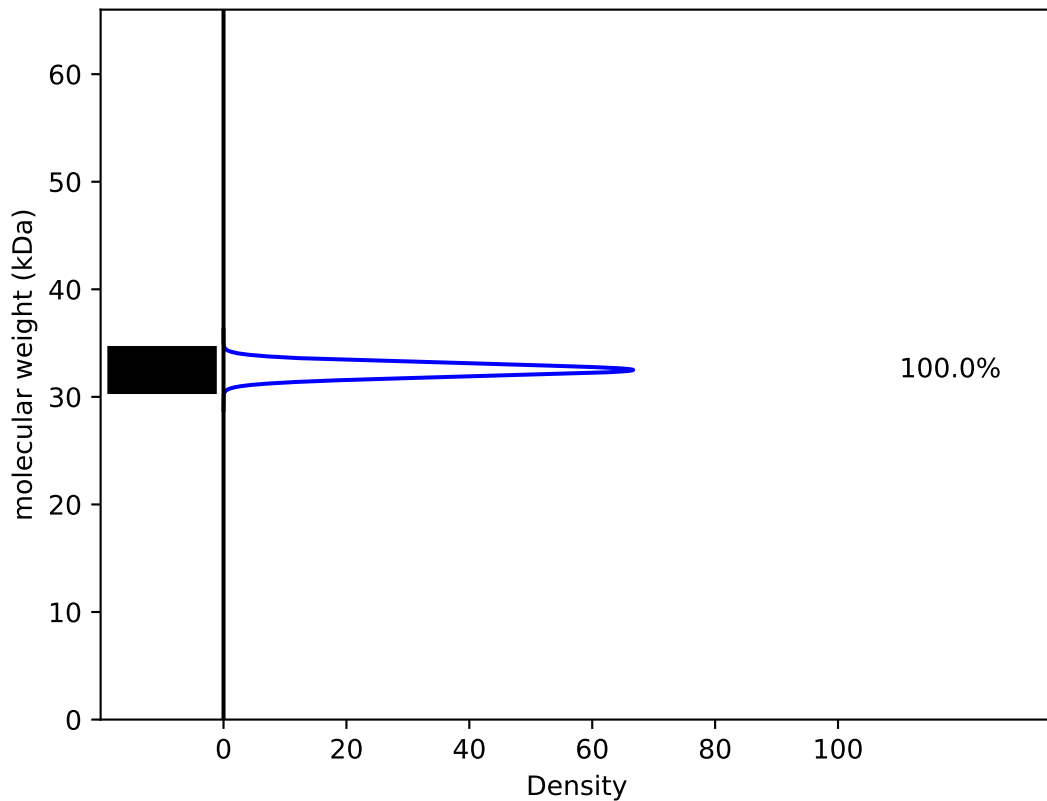

O43399

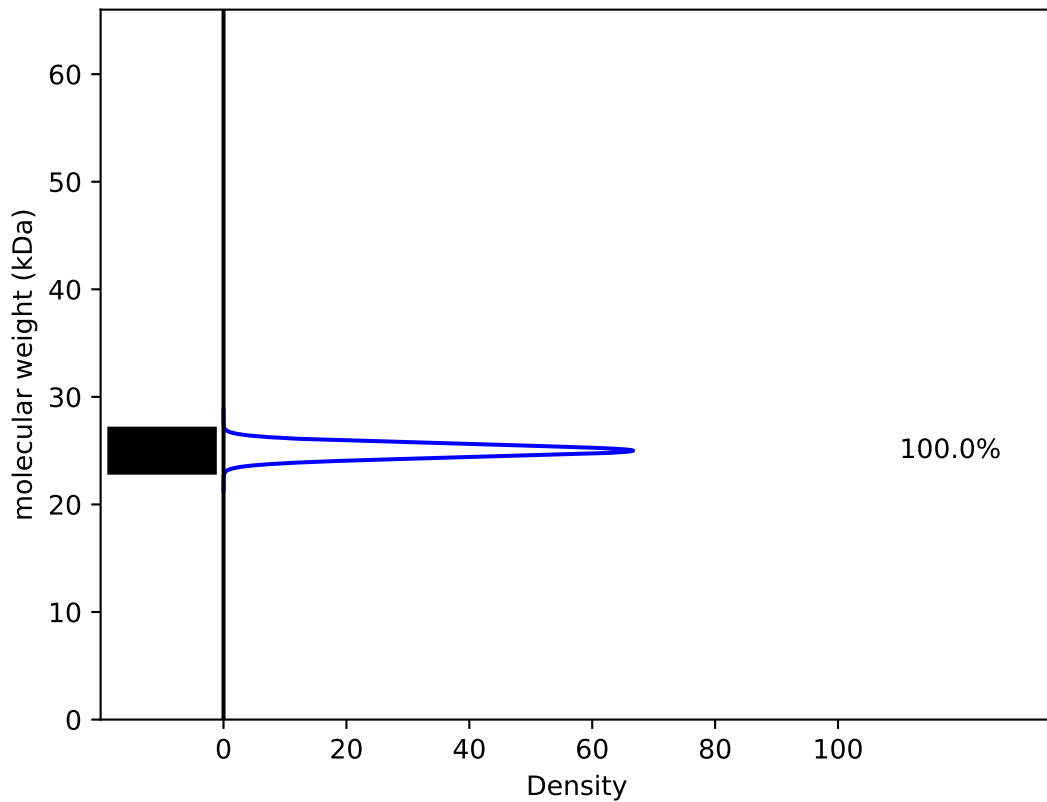



O43402



O43447



# Q8NHP1



O95154



O43583

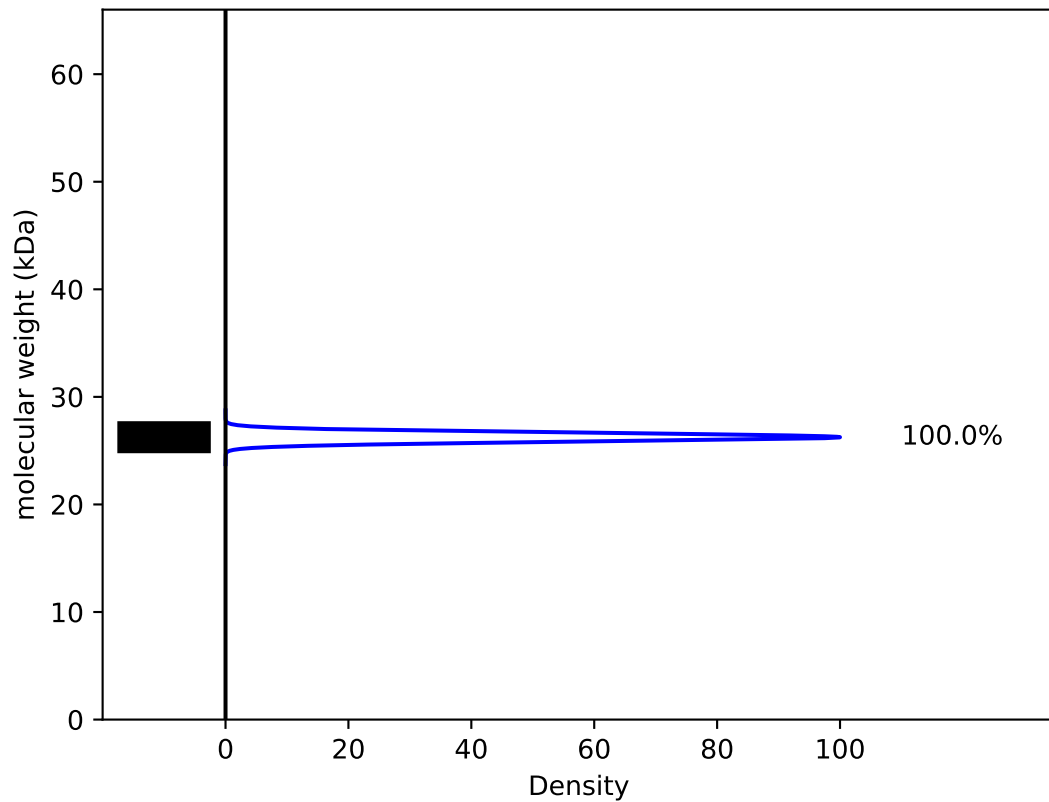

O43598



O43617



O43660





O43670

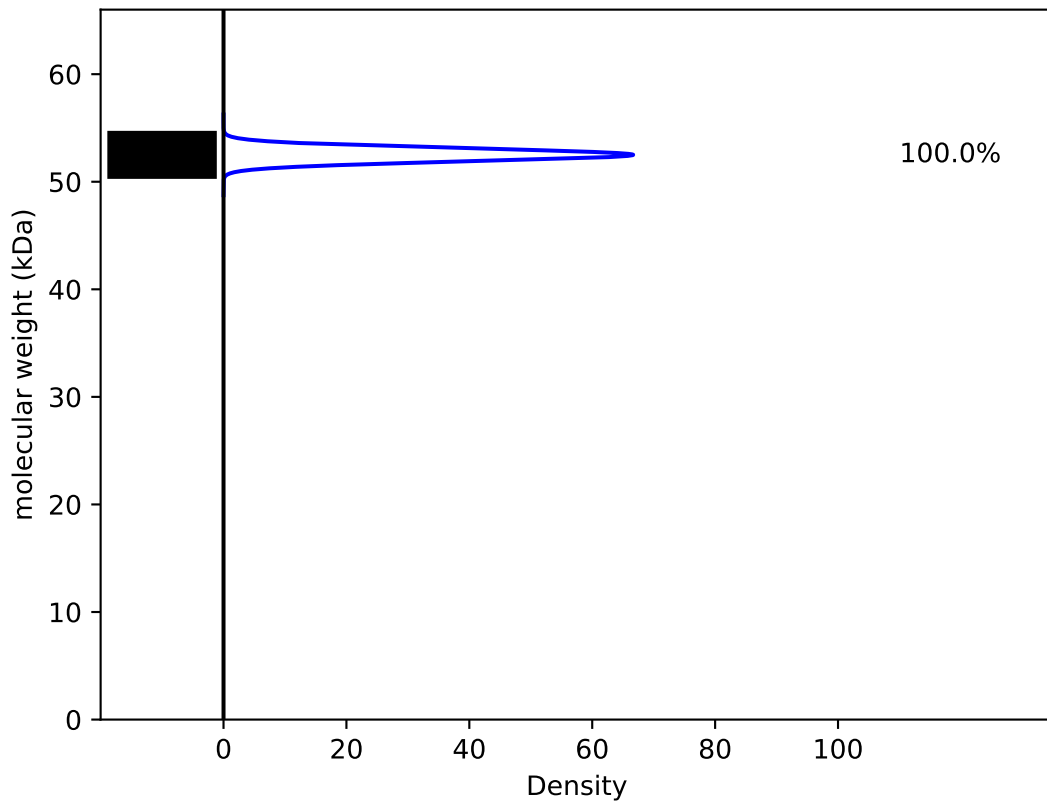

O43681



O43684

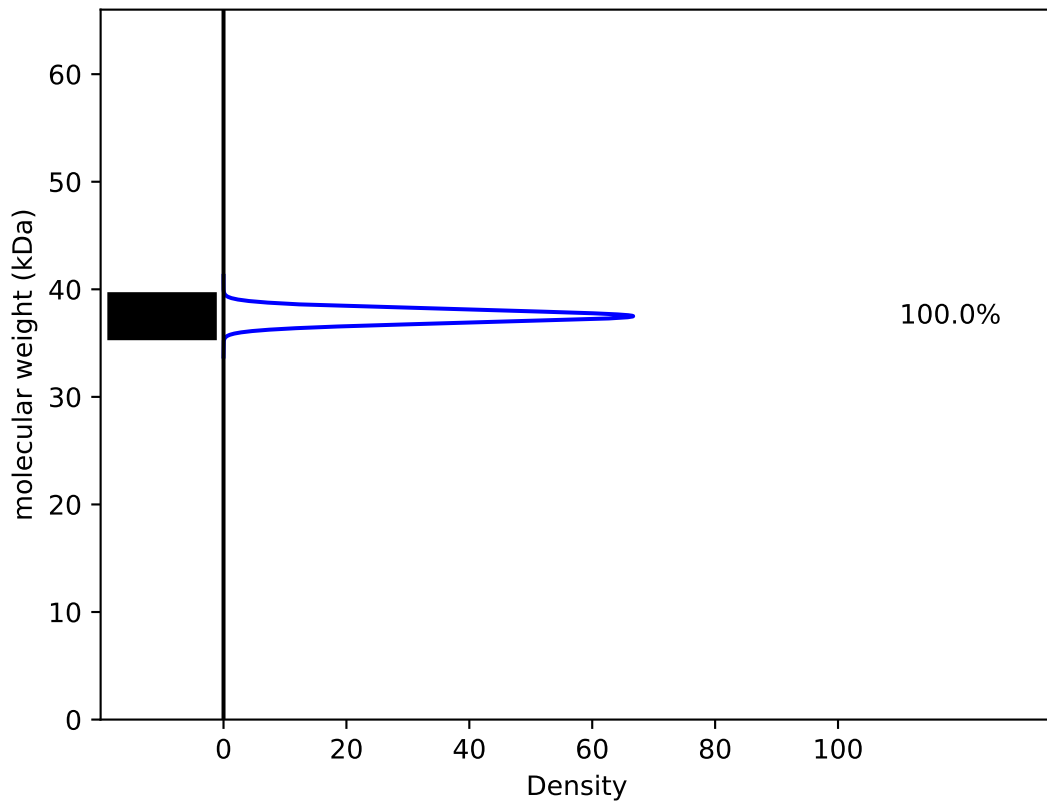

O43765

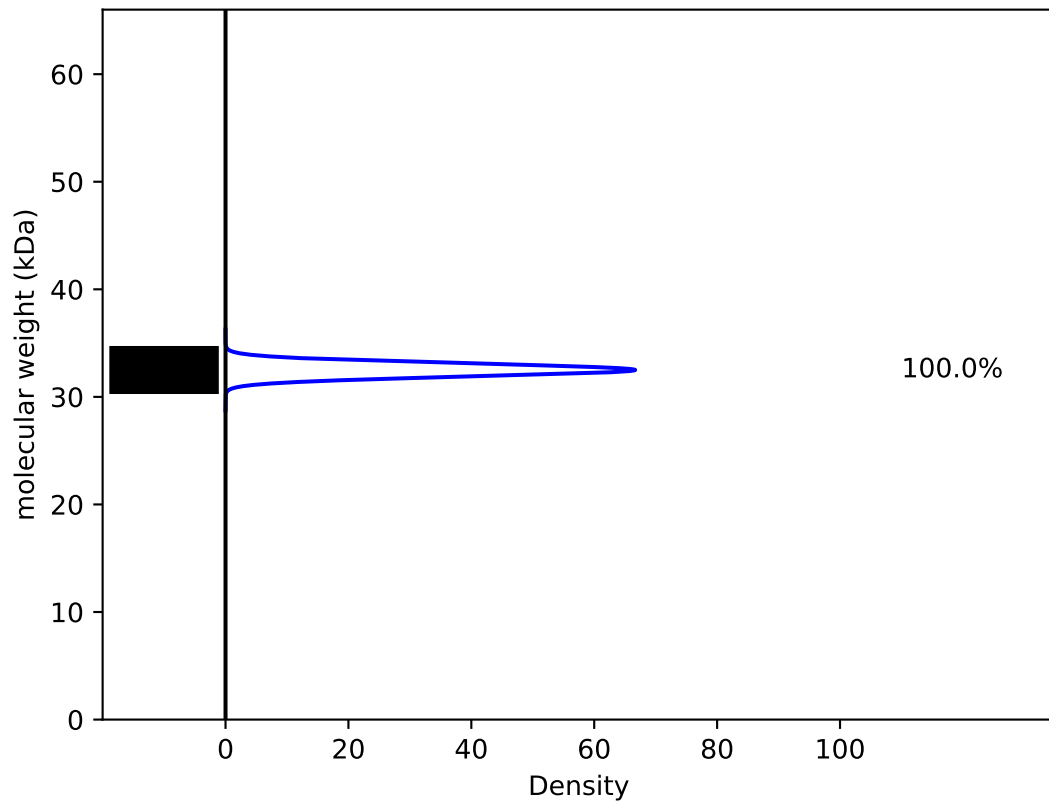

O43772

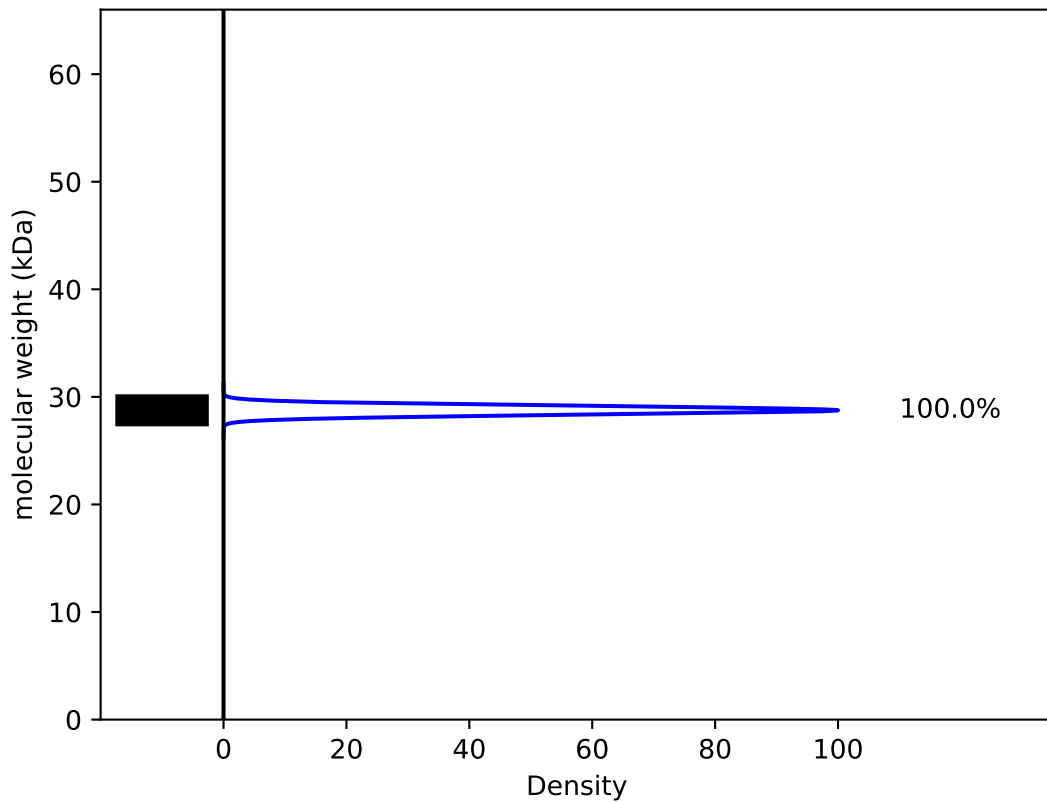

O43809

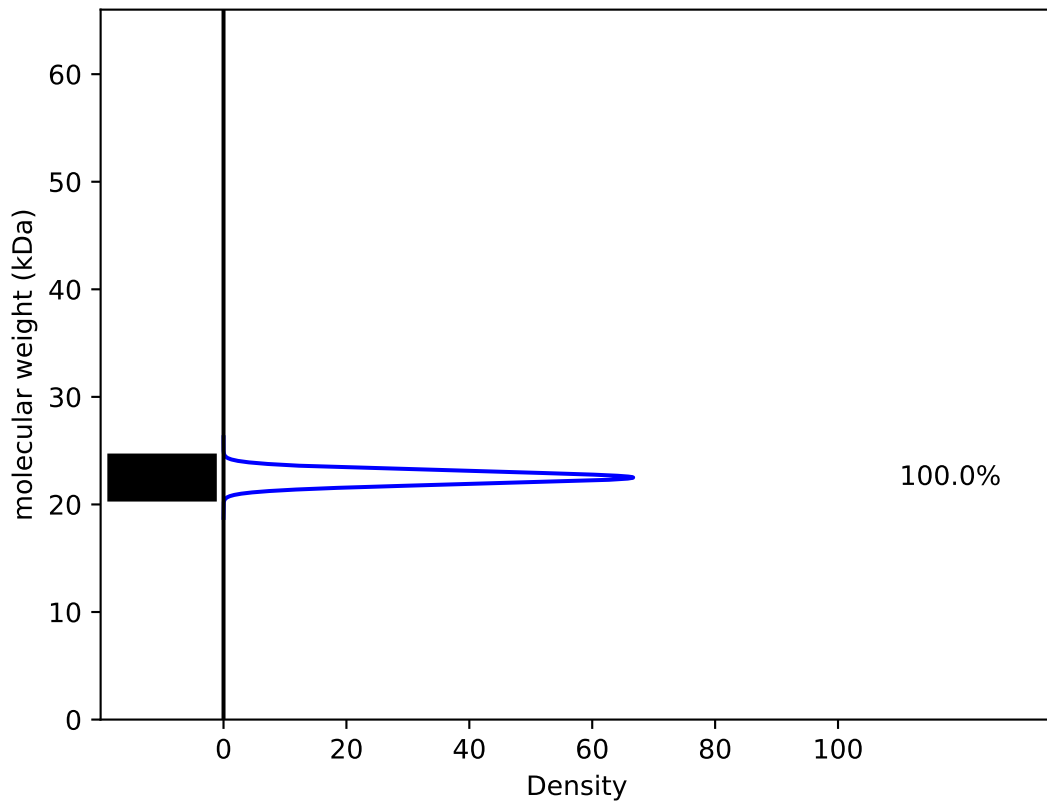

O43818



O43920





O60232



O60256



O60493



O60547



O60573



# O60664



O60701

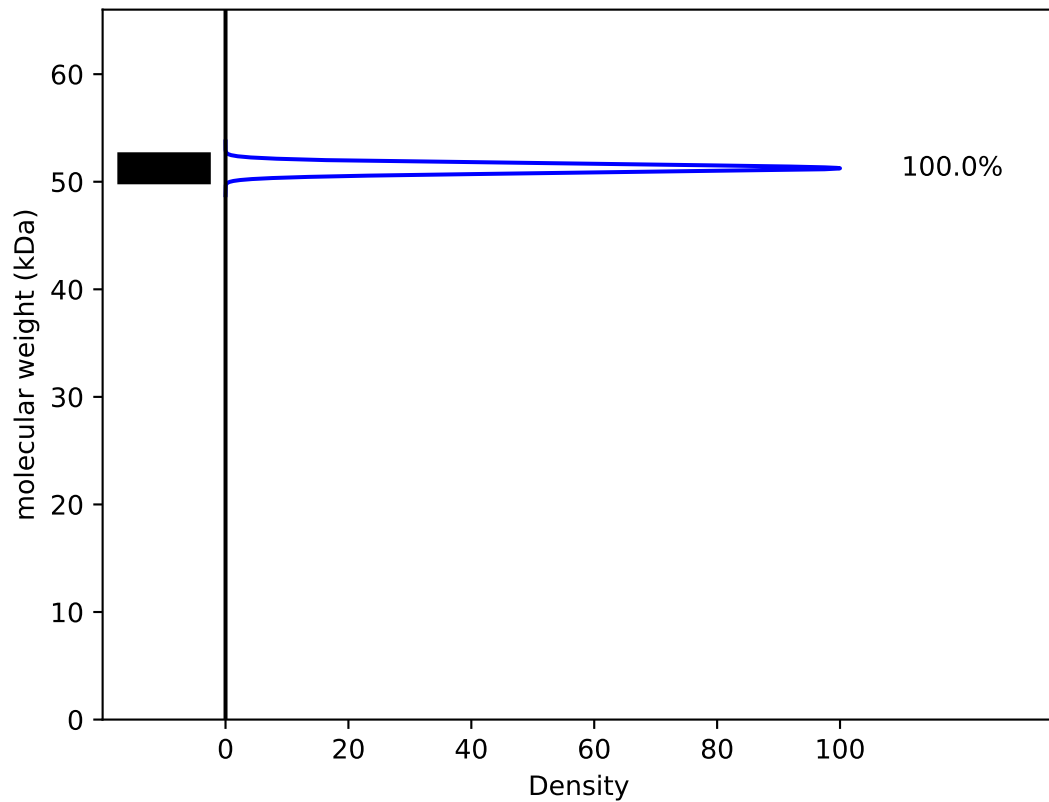

O60739





O60762



O60783



O60784

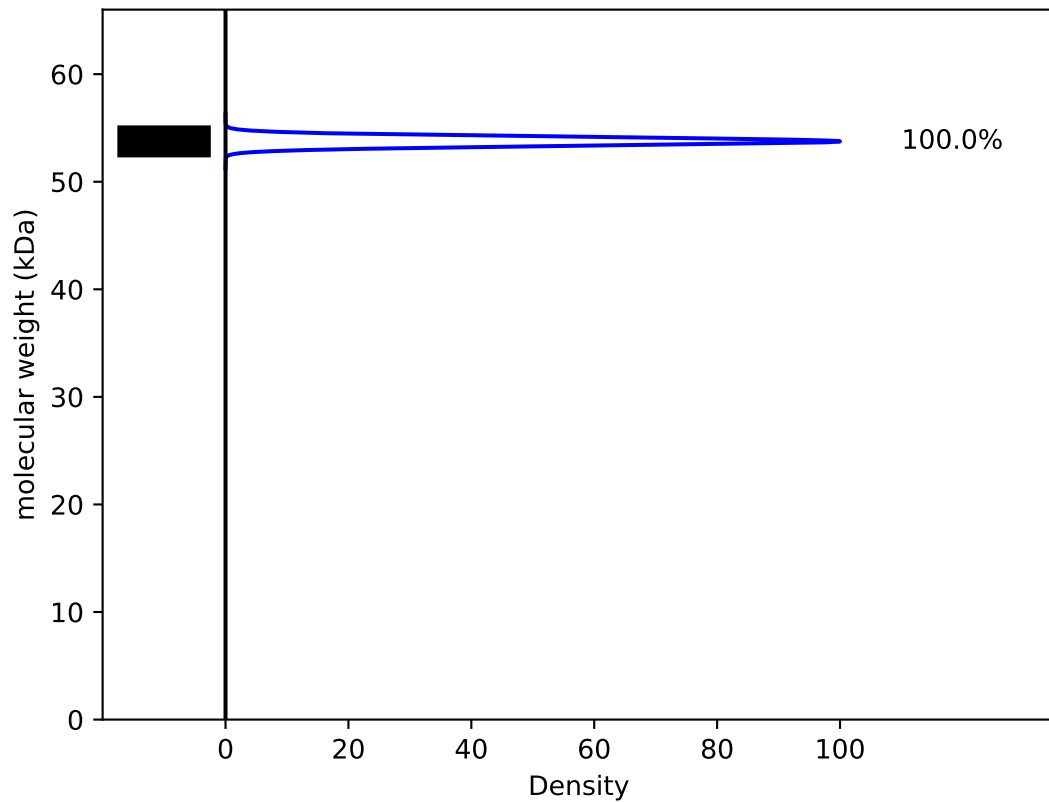

O60814

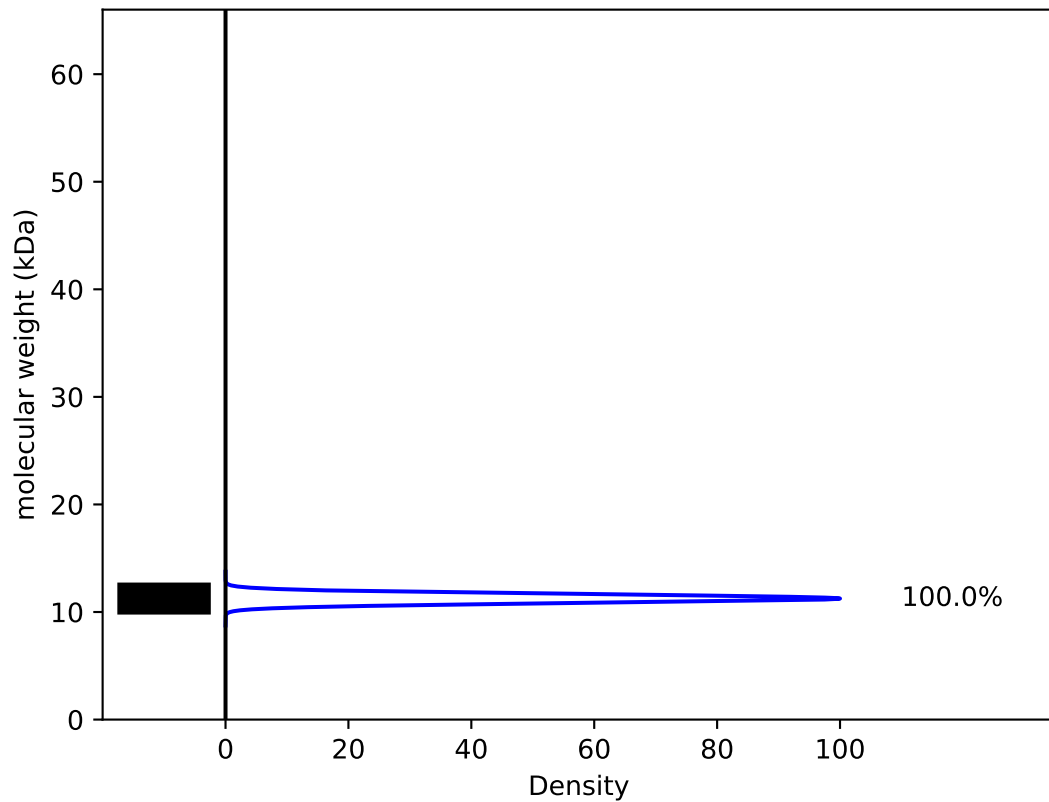

# P57053



O60832



O60869



O60884





O60925



O75131



# Q96FN4

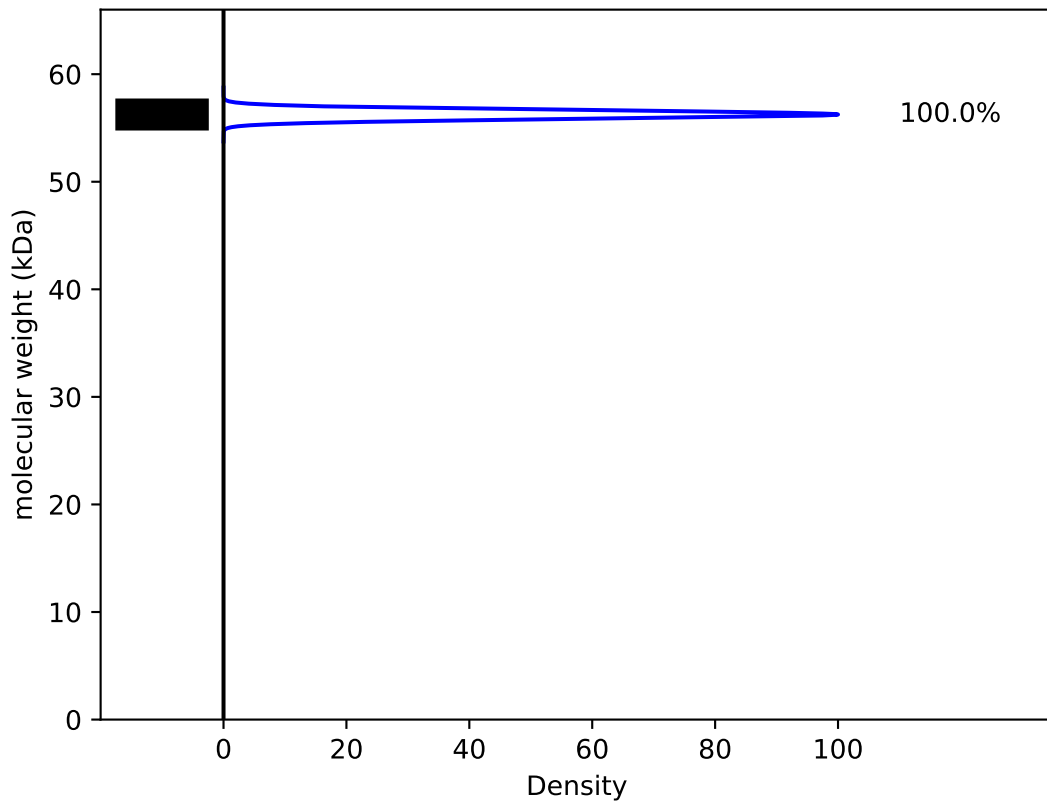

# Q8WWF6



# Q8NHS0



O75208



O75223

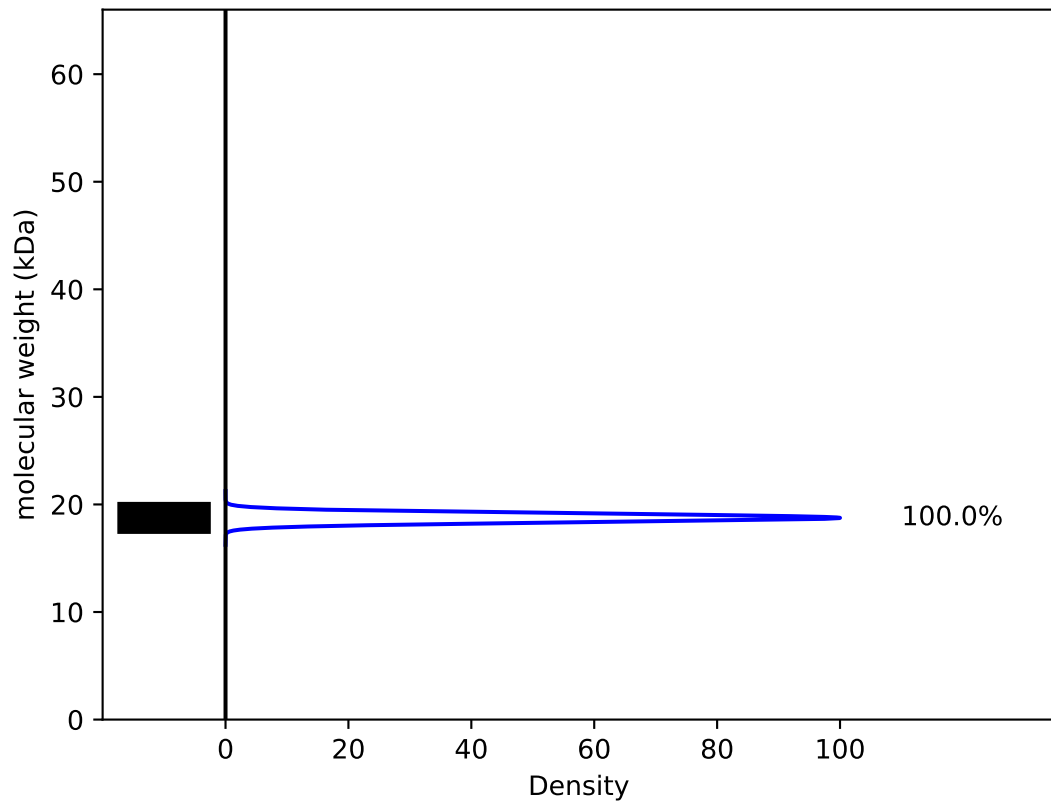

O75312





O75340

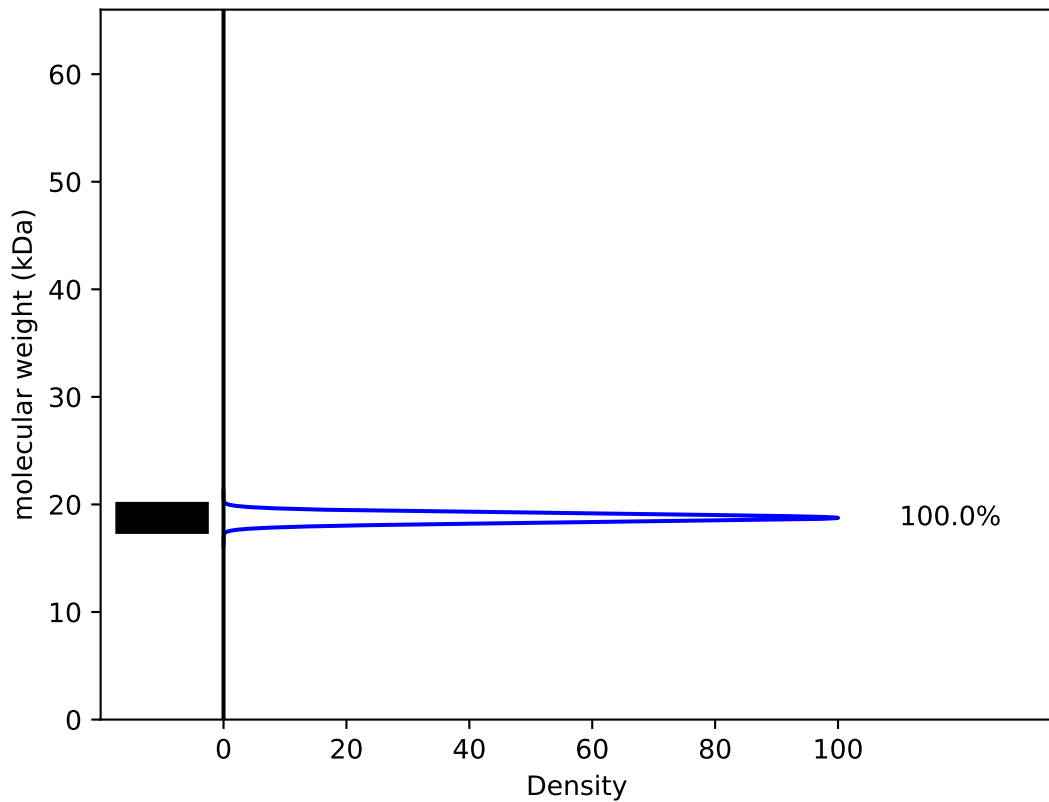

O75347



O95670

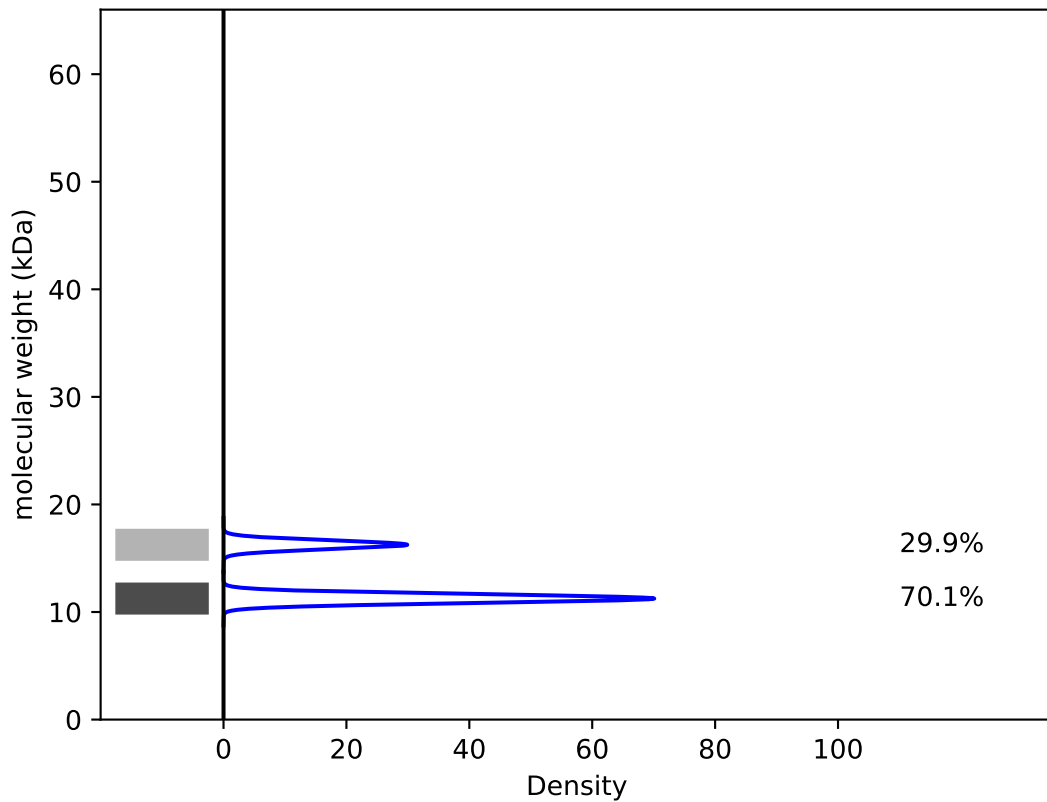

O75351

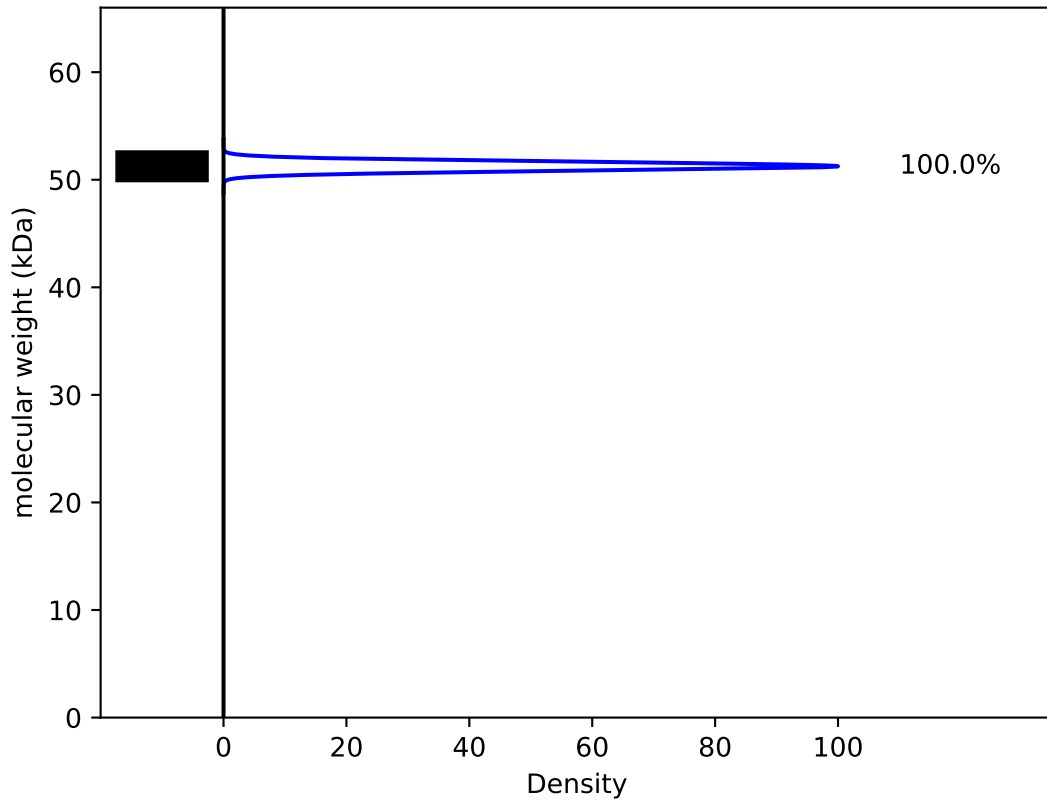

O75367



O75396



O75414



O75436





O75477



O75521



O75569



O75607



O75608



O75629



O75663



O75695

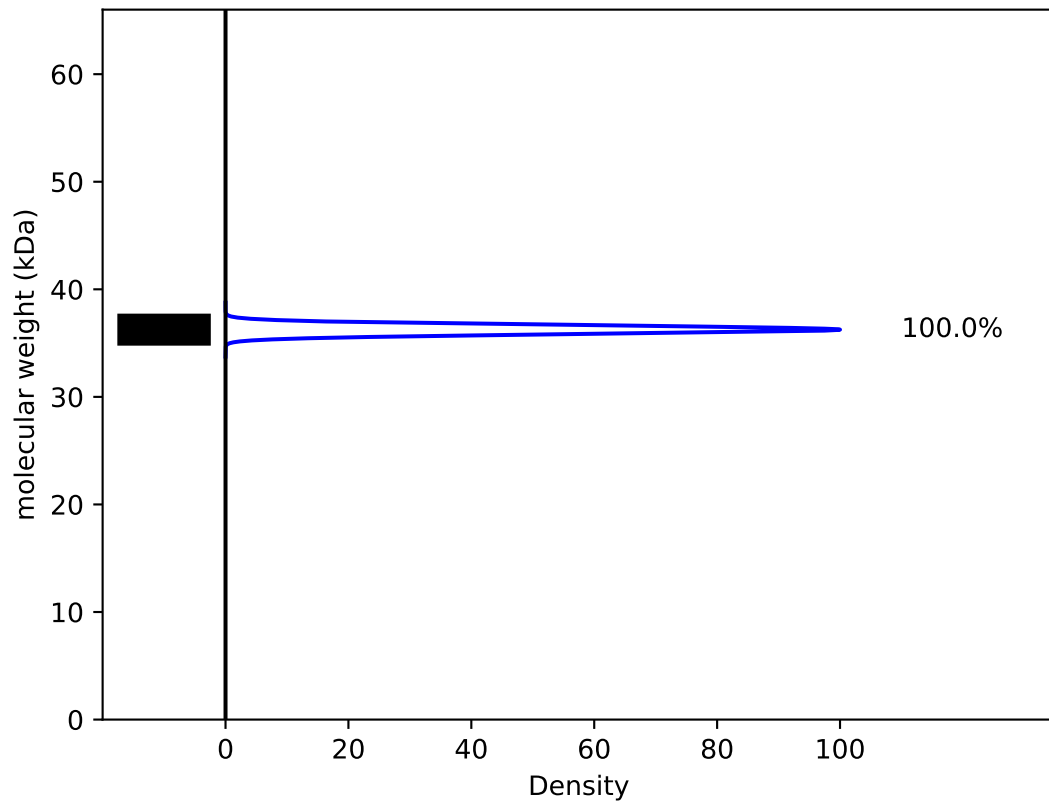



O75718



O75792



O75794



O75821

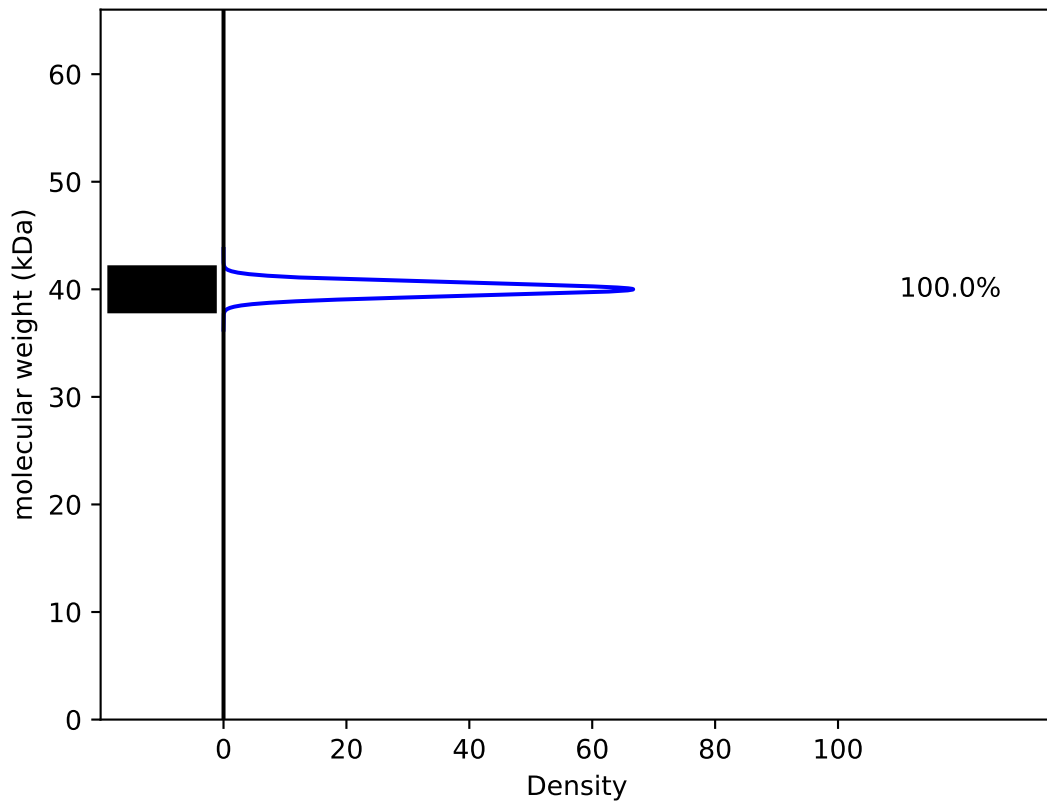

O75822



O75828



O75832



O75934





O75935



O75937

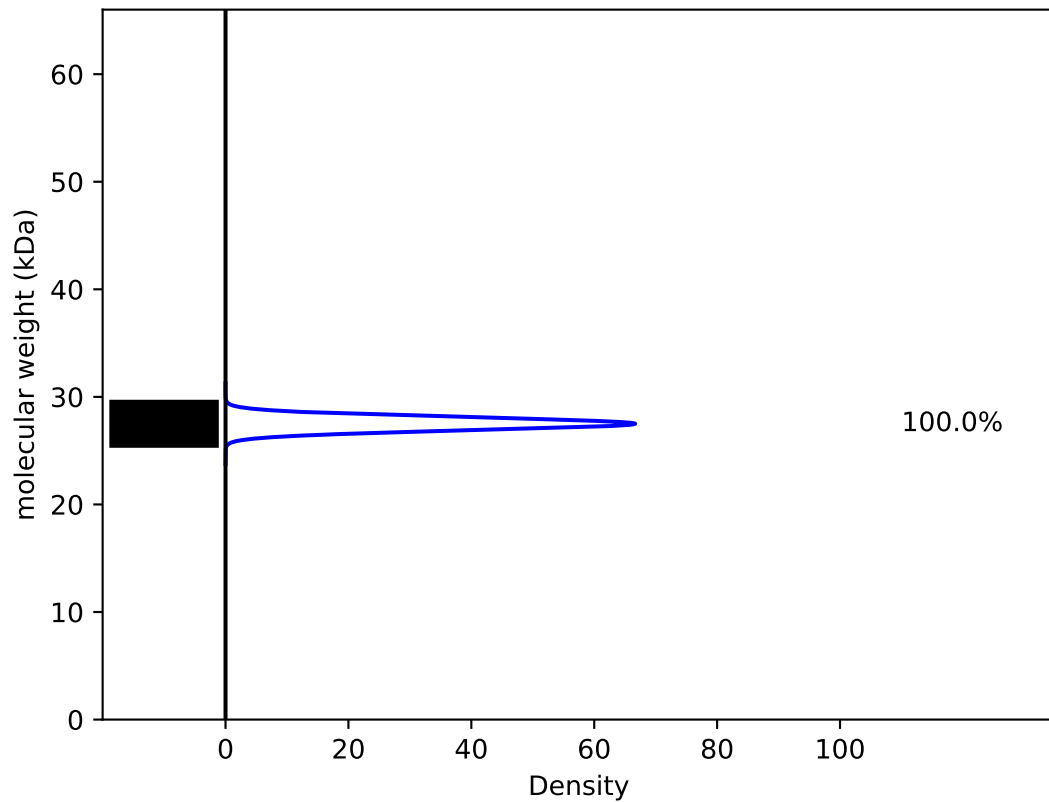

O75940



O75947



O75955



O75964



O76003



O76071





O76075



O94760



O94766



O94788



O94888



O94905



O95059



O95159





O95168



O95218



O95219



O95249



O95292



O95295



O95299



O95336





O95372



O95376

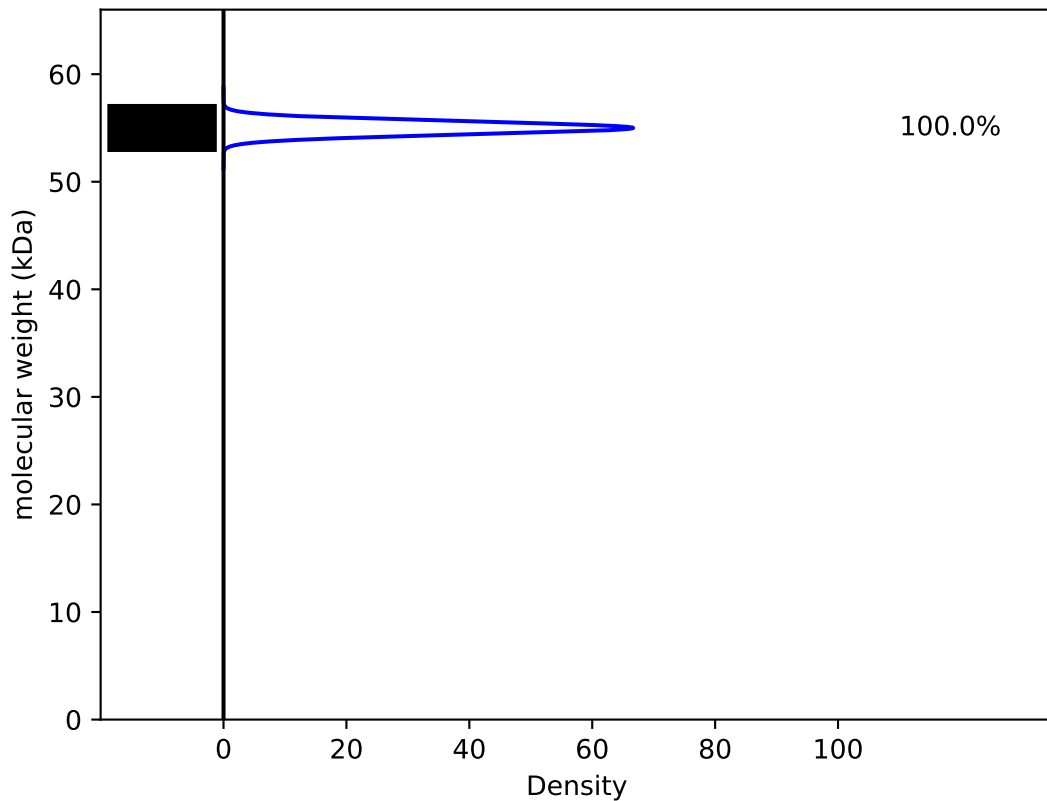

O95394

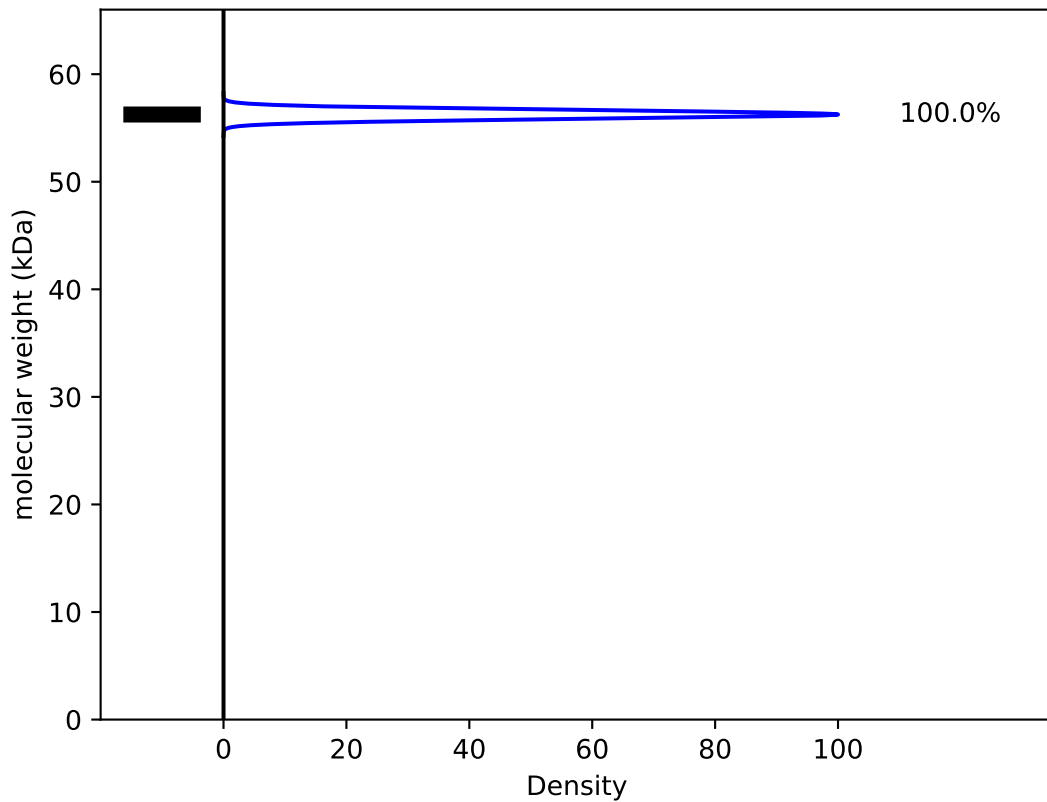

O95433



O95456



O95551

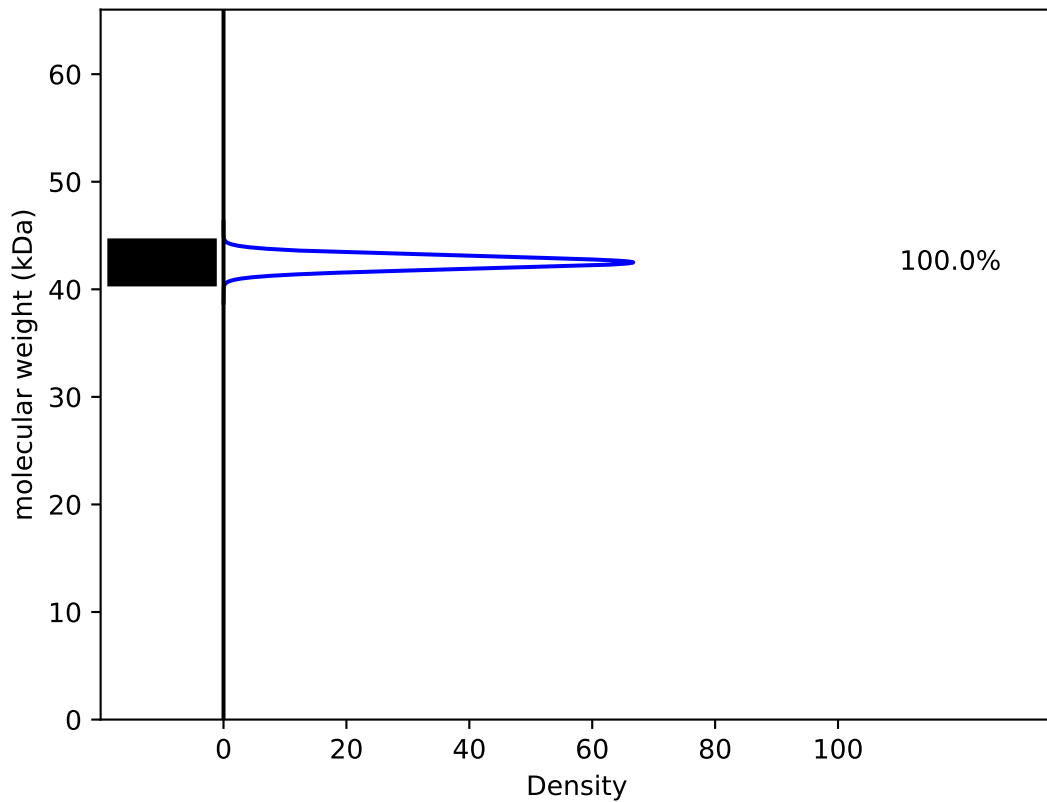

O95571



O95619





O95630



O95707



O95721



O95747



O95749



O95777

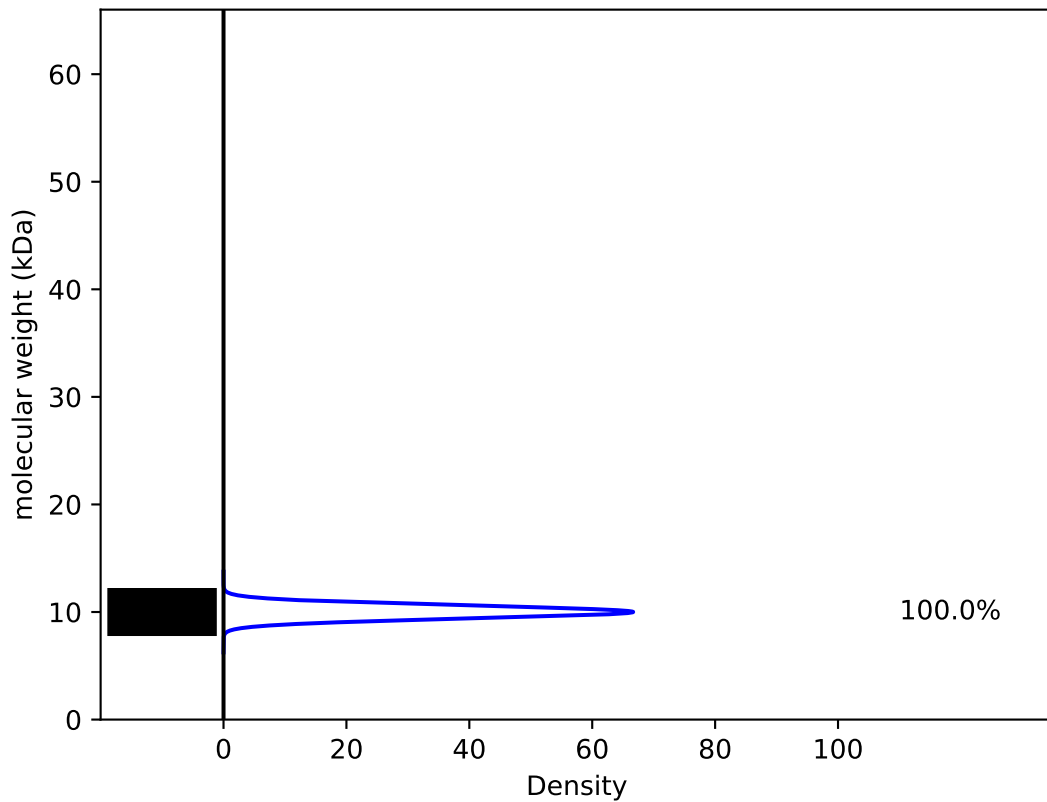

O95801



O95816





O95825



O95861



O95865



O95881



O95926



O95983



O96000



O96008





O96011



O96019



O94805

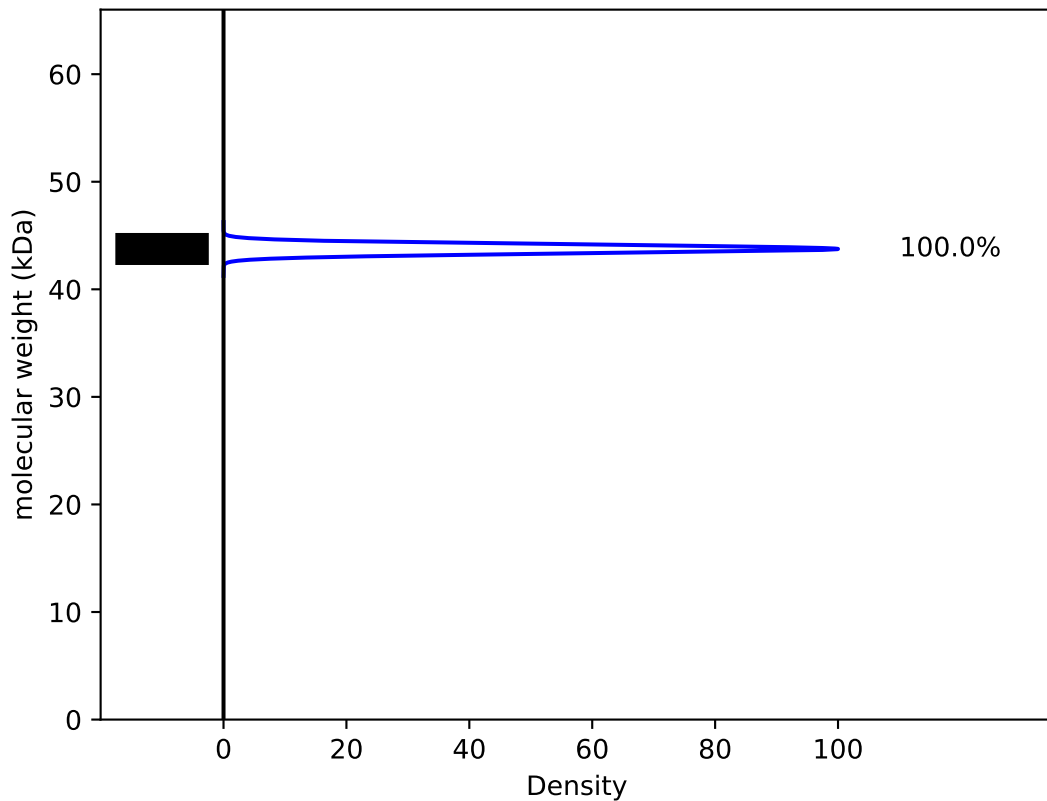

P00167



P00374

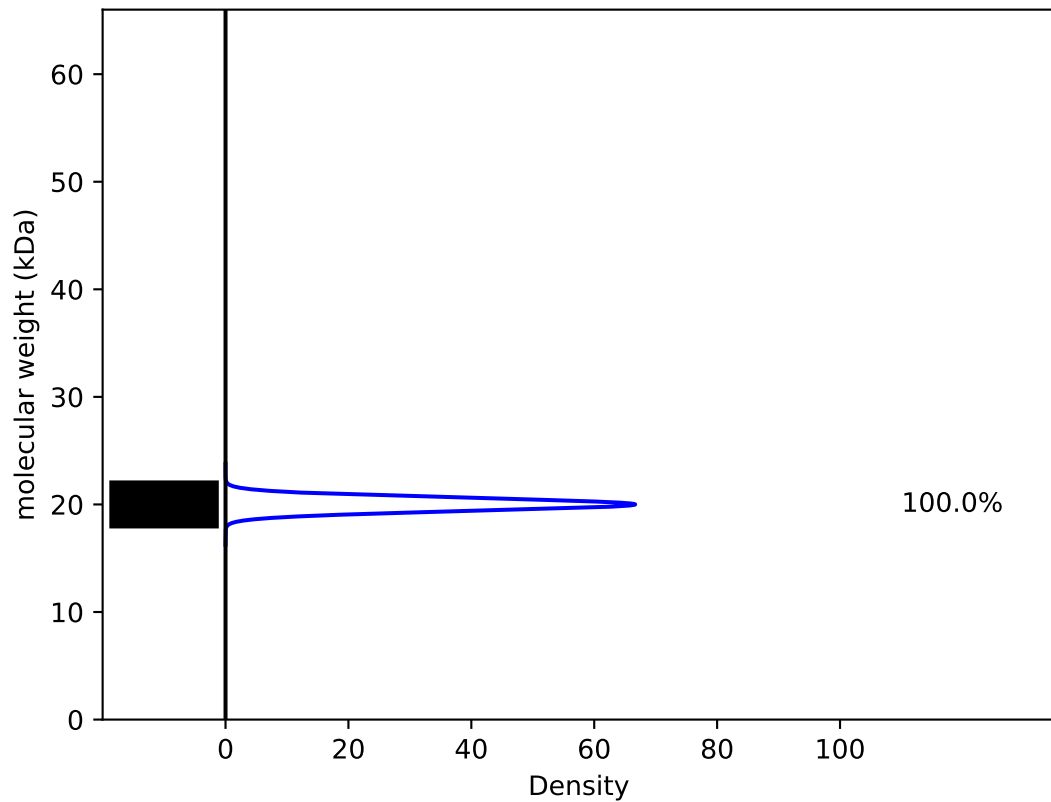

# Q86XF0

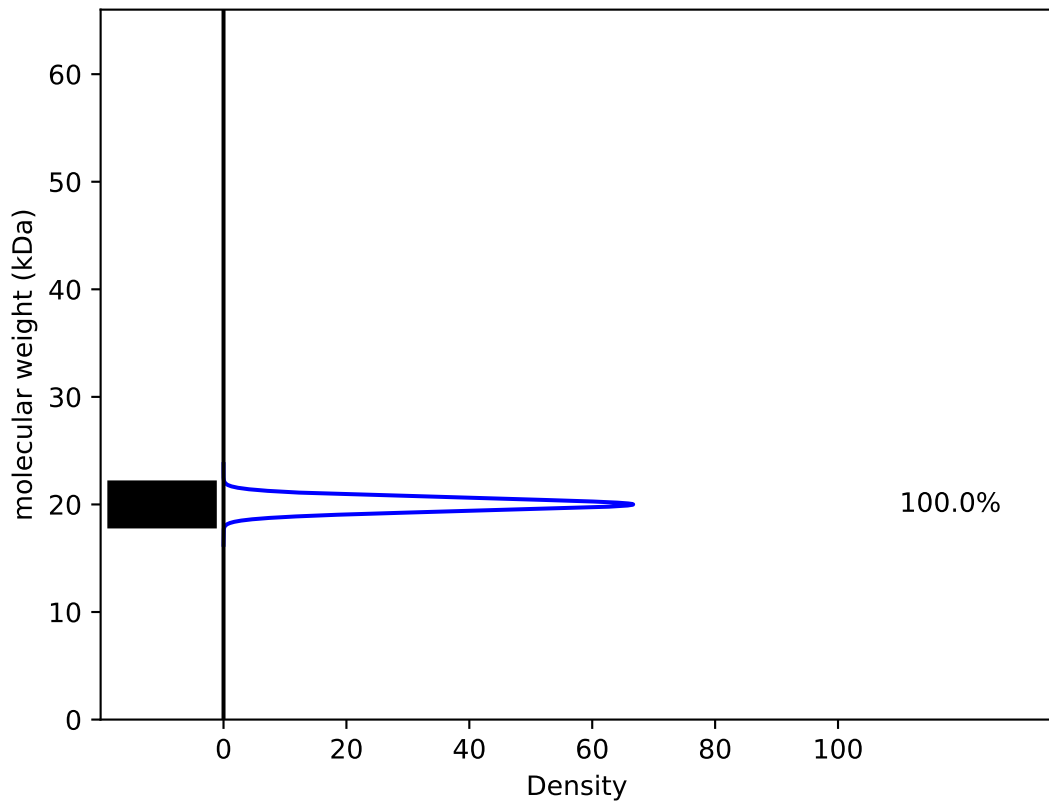

P00387



P00491

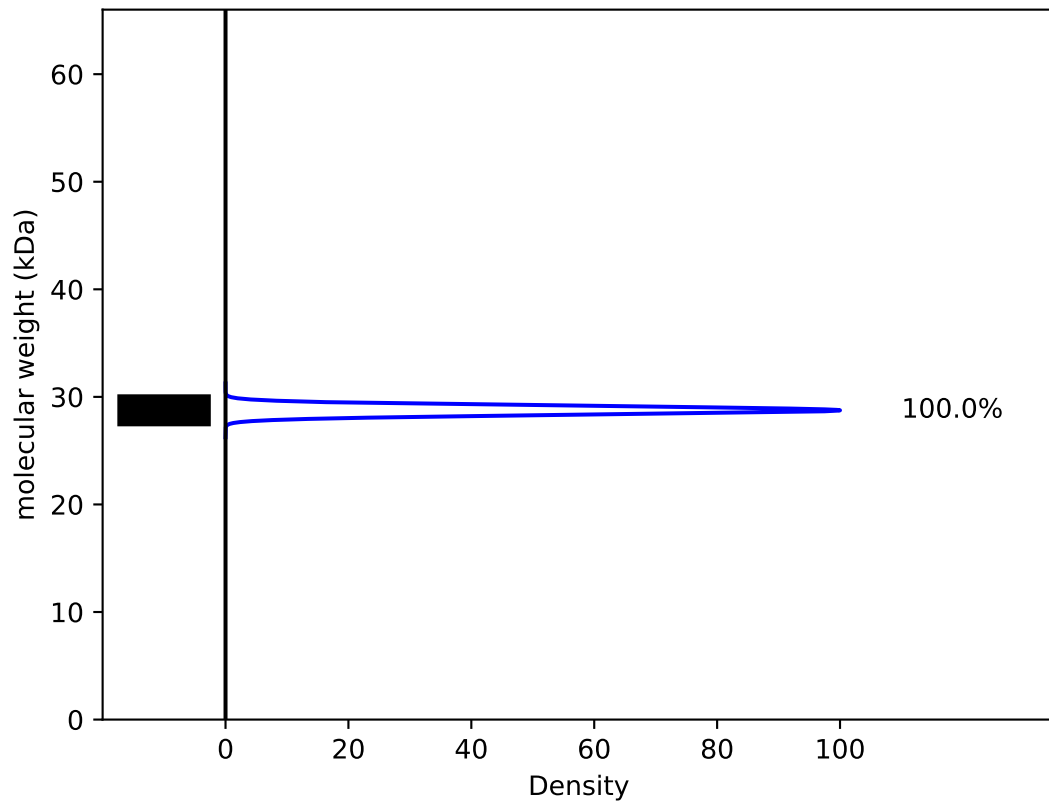



P00492



# P00558

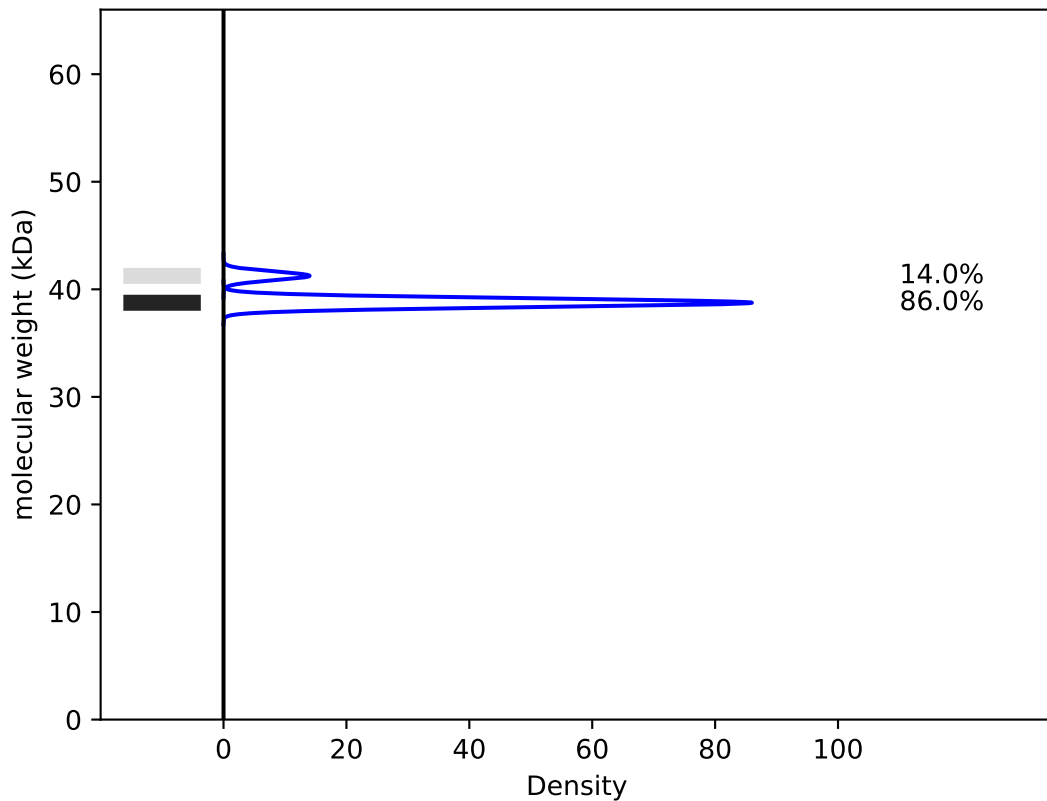

P07205

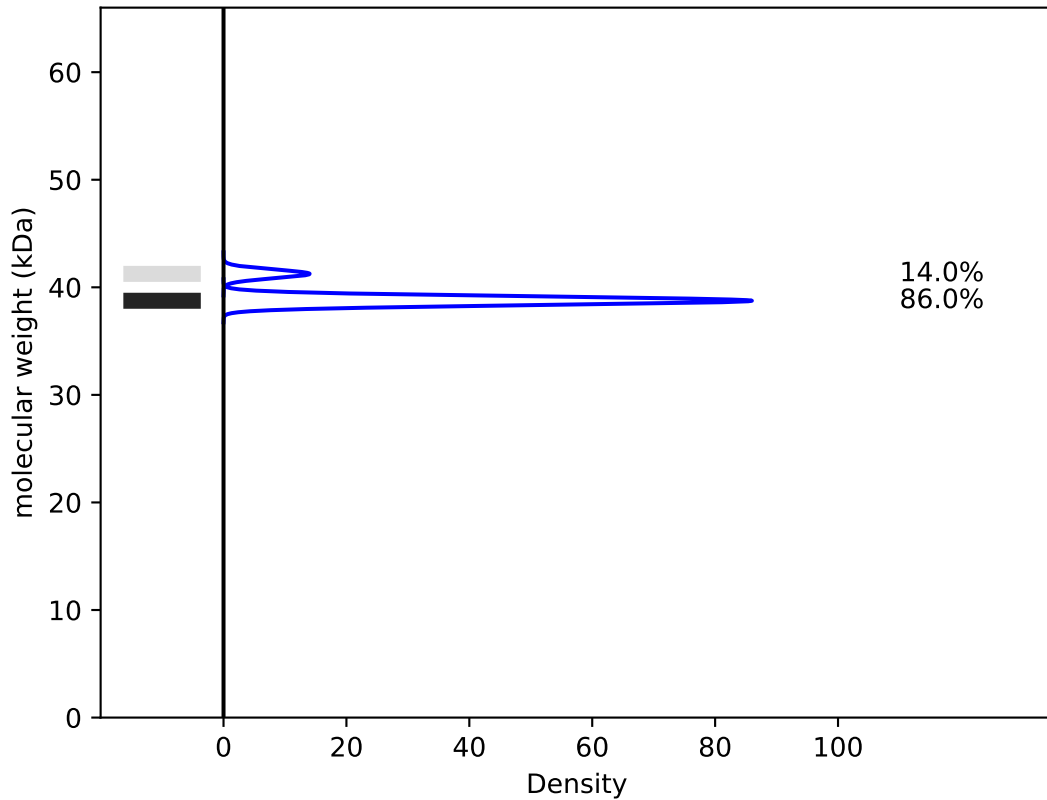

P00568

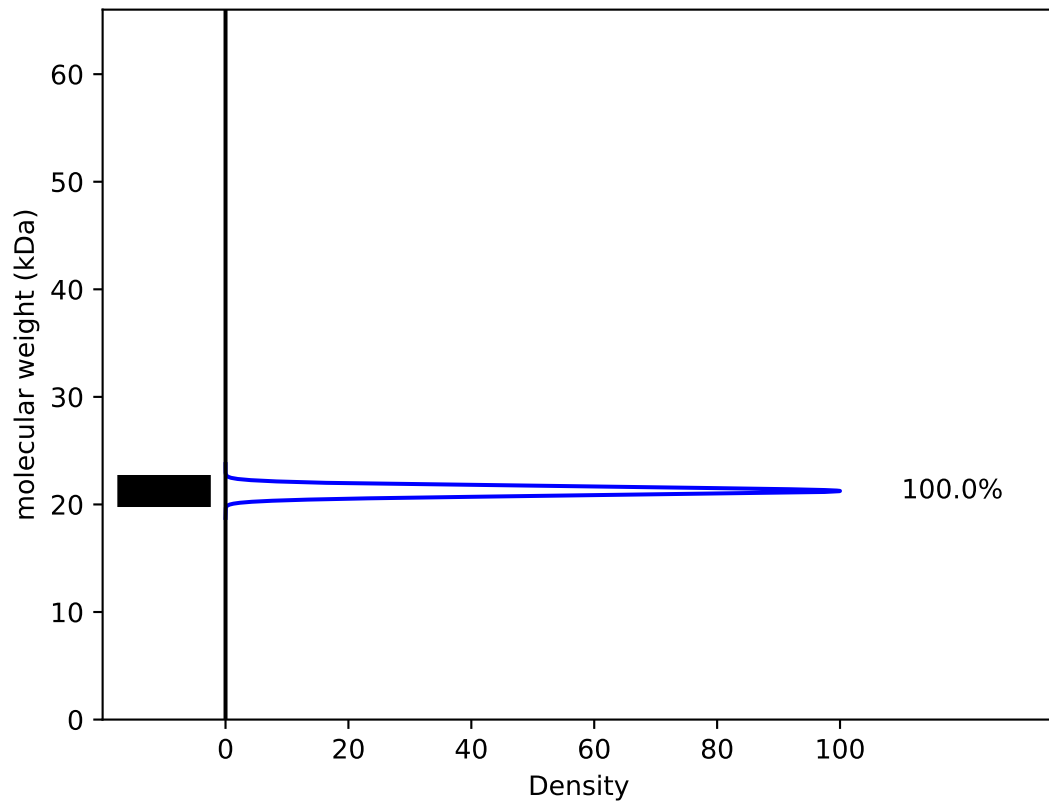

P00918



P00966

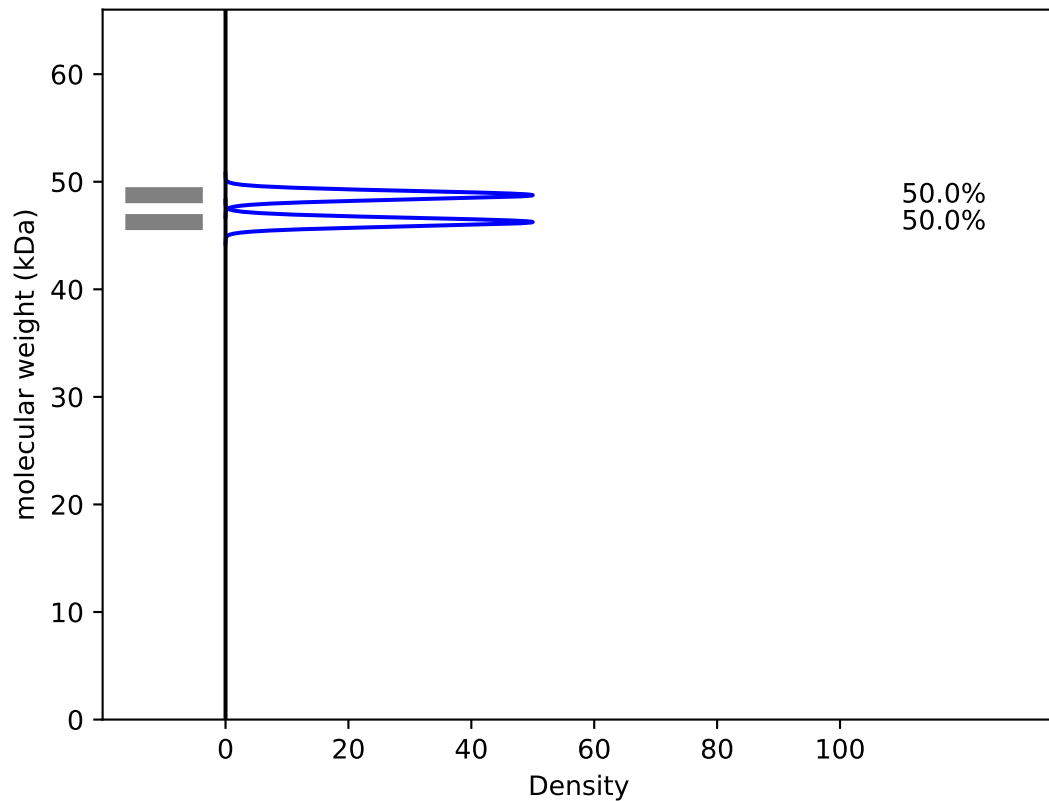

# P01111



# P01116





# P01889

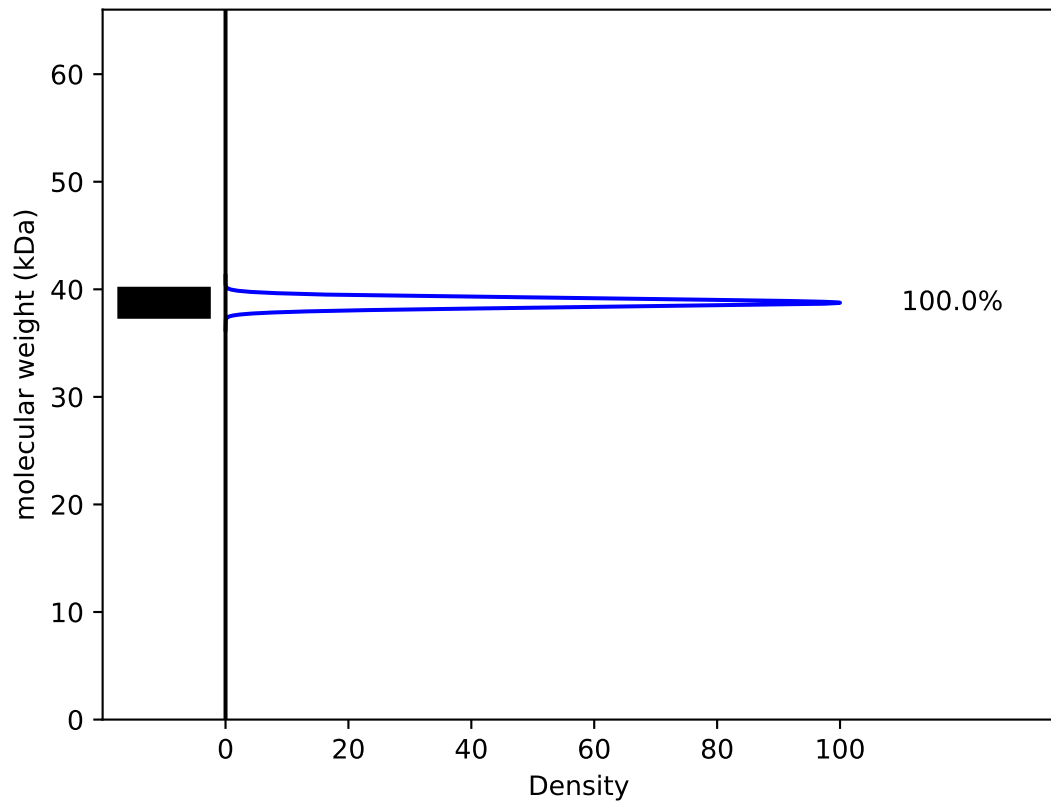

# Q31610



P30486



P01892



# P30459



# P10314



# P30512



# P16189





# Q09160



# P30511



P04062

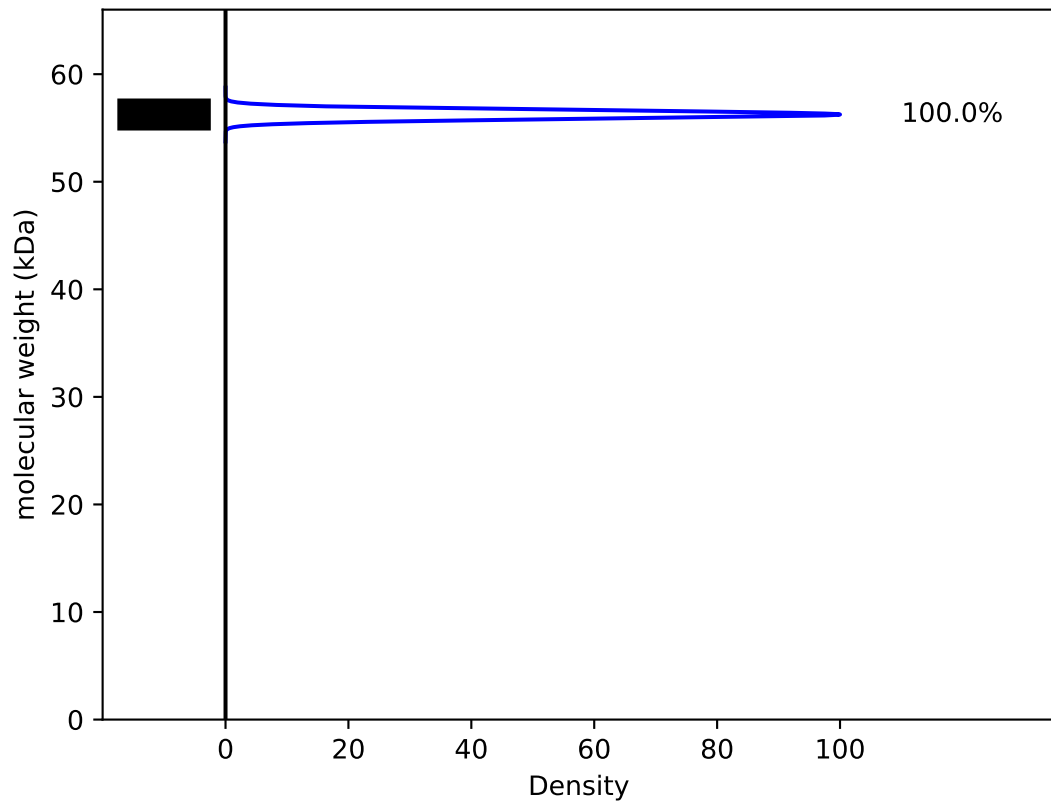

P04066



P04075

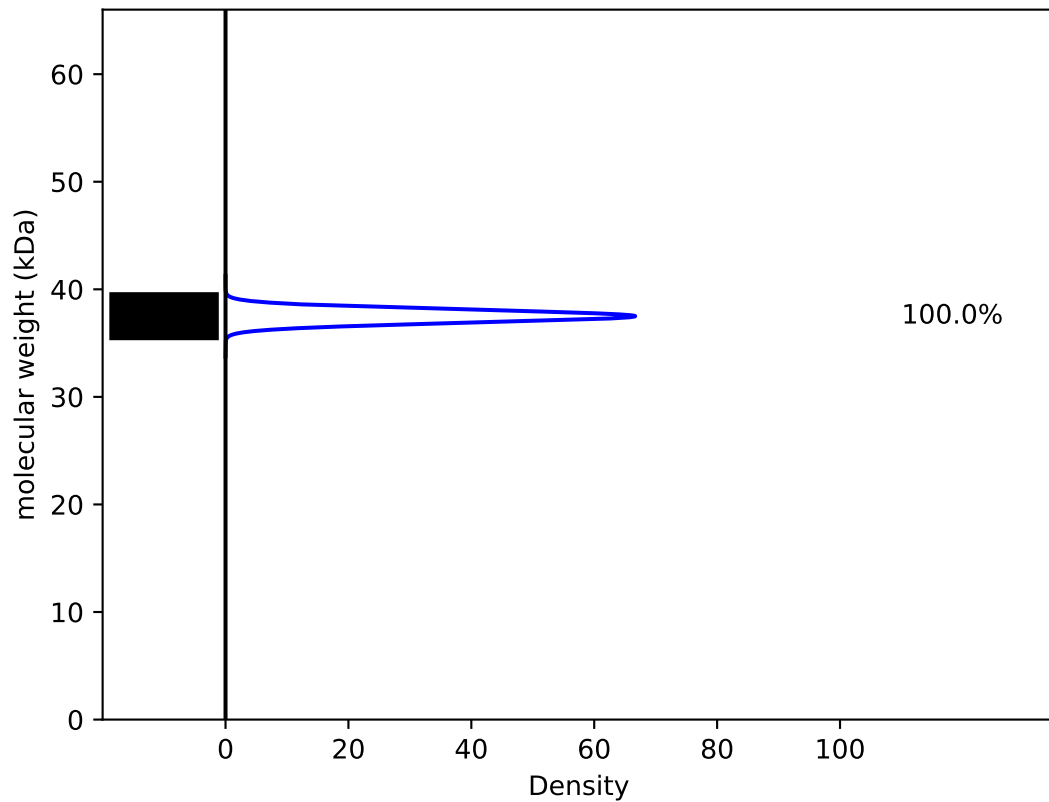

P05062



P04080

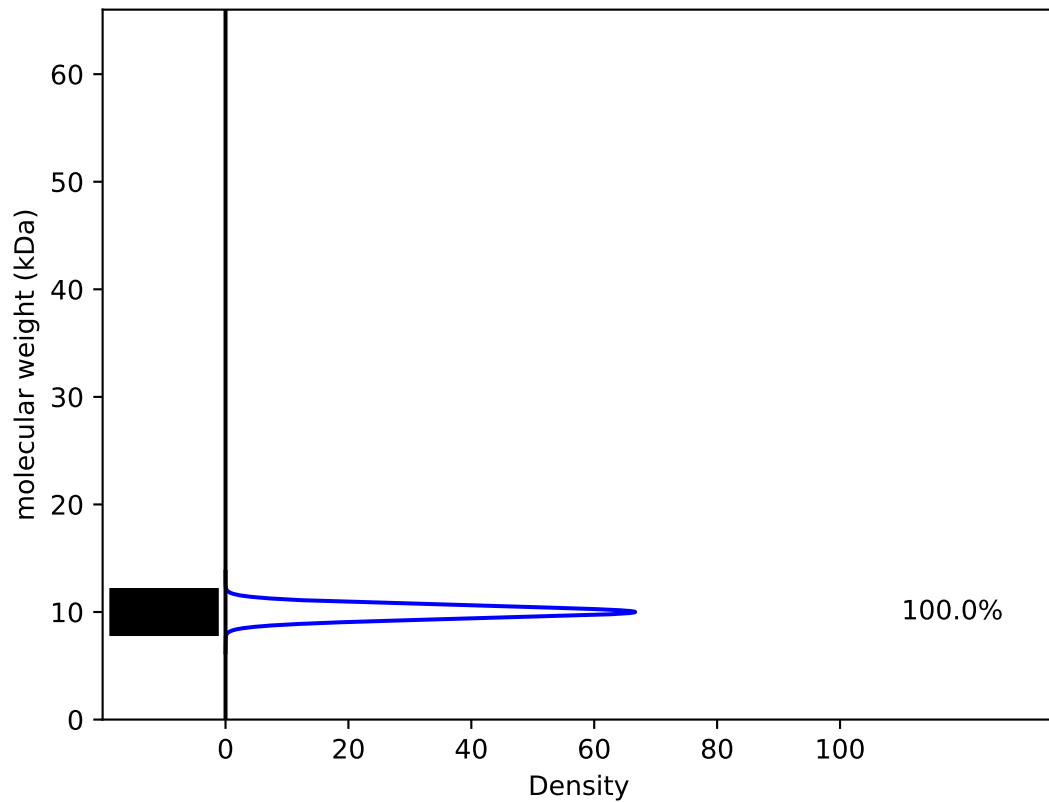

P04083





P04181



P04183



P04350

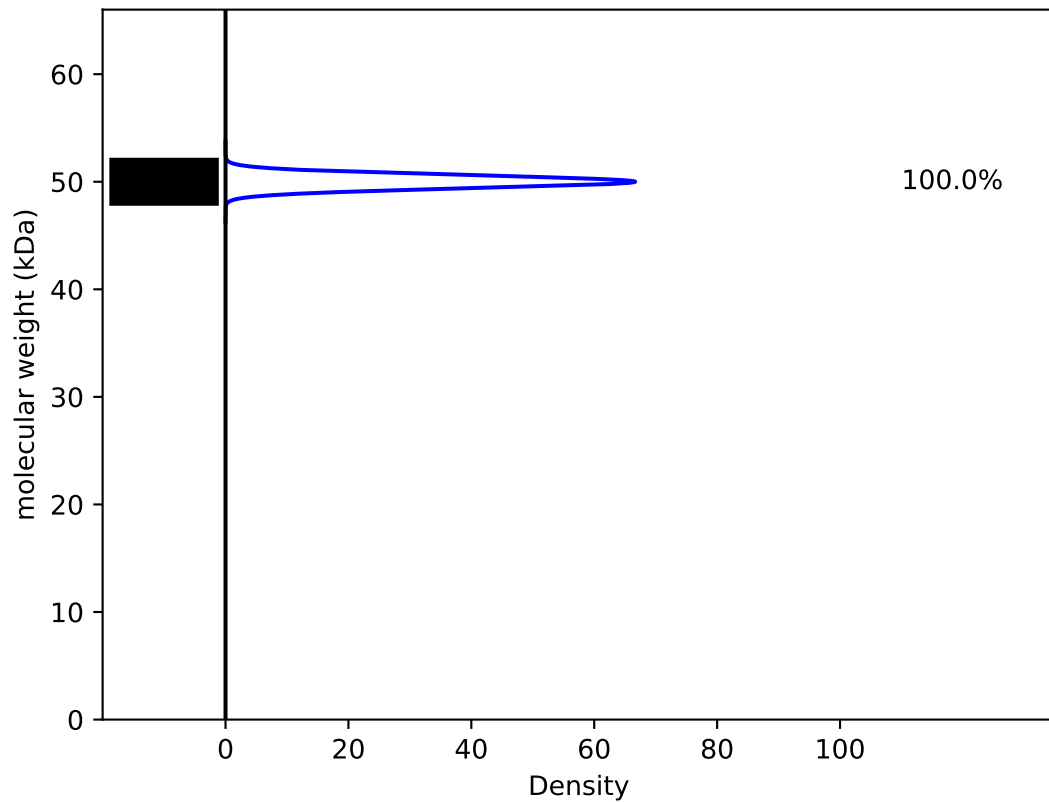

P04406



P04632

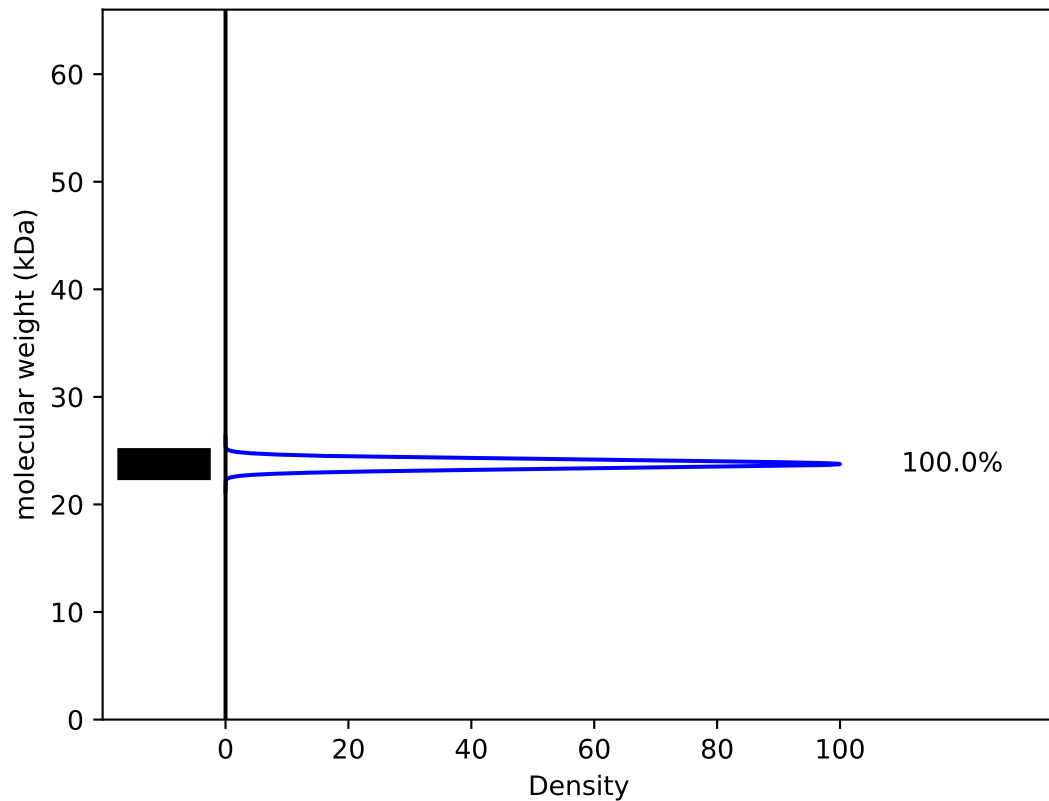

# Q96L46



P04637



P04792

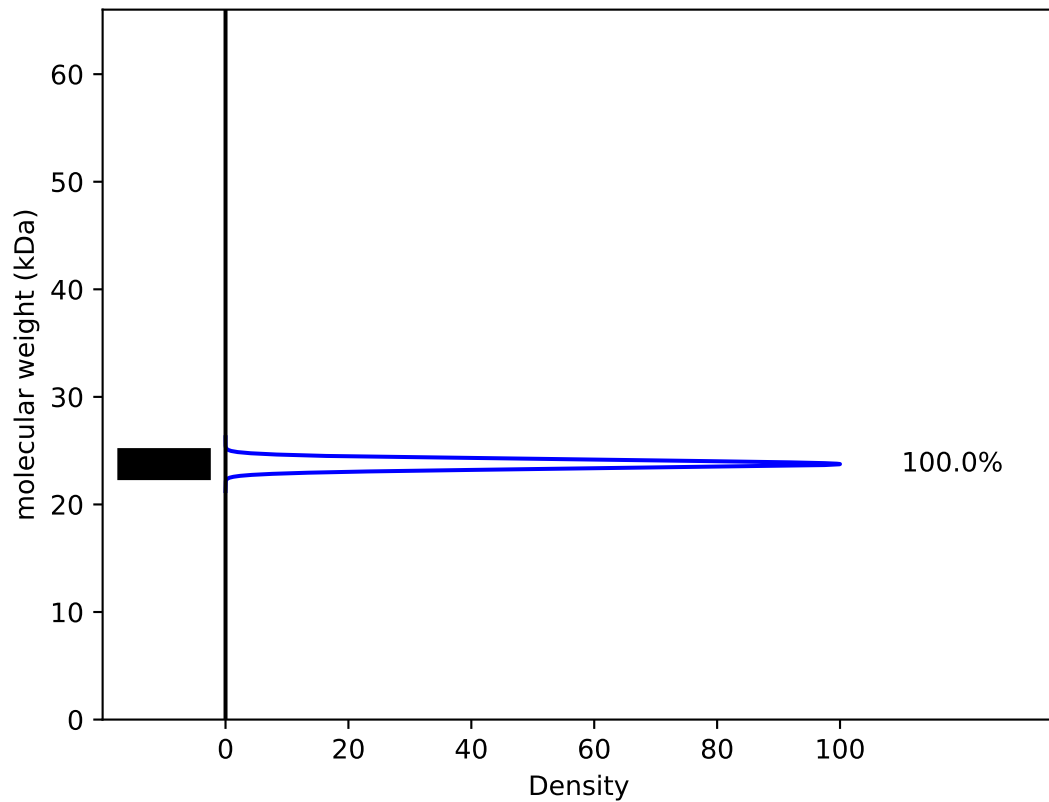



P04818



P04899



Q93077

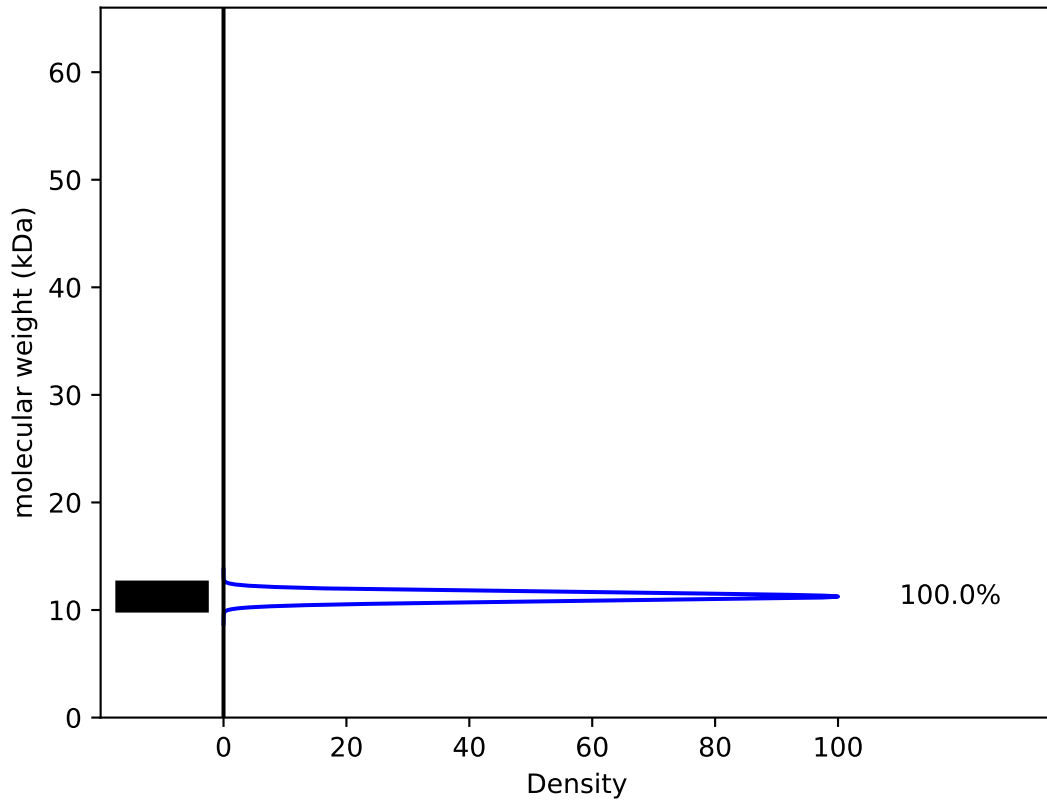

# Q7L7L0



P04908



P05026

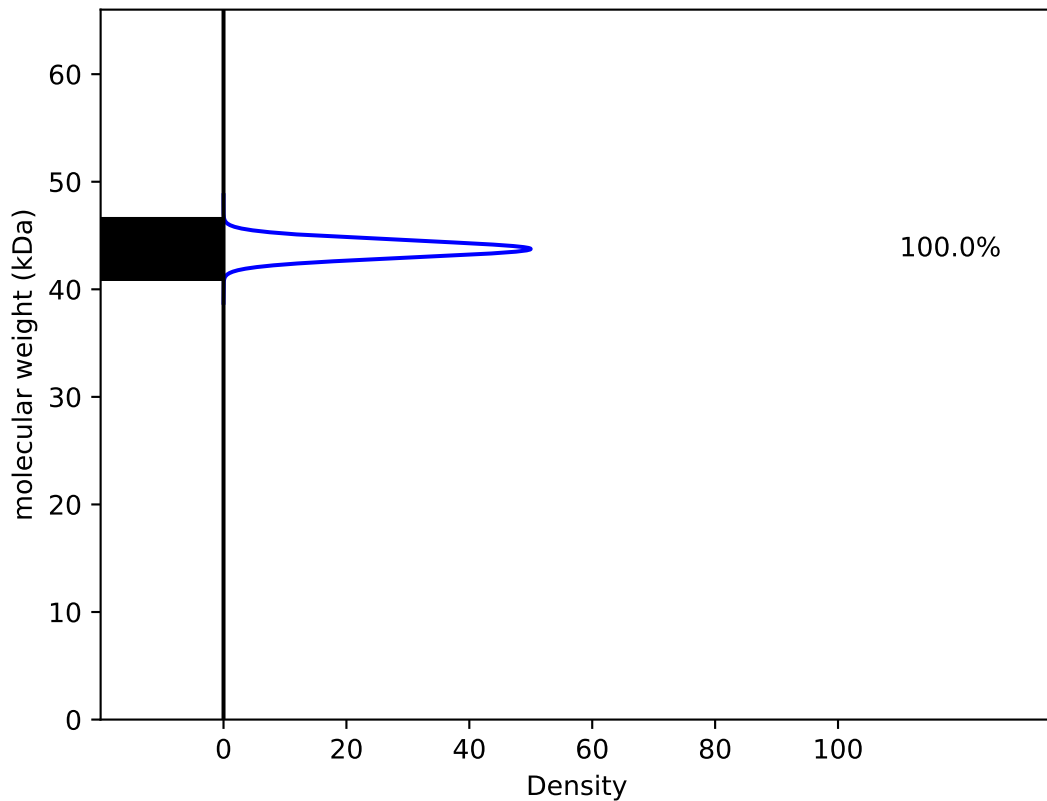

P05114



P05161

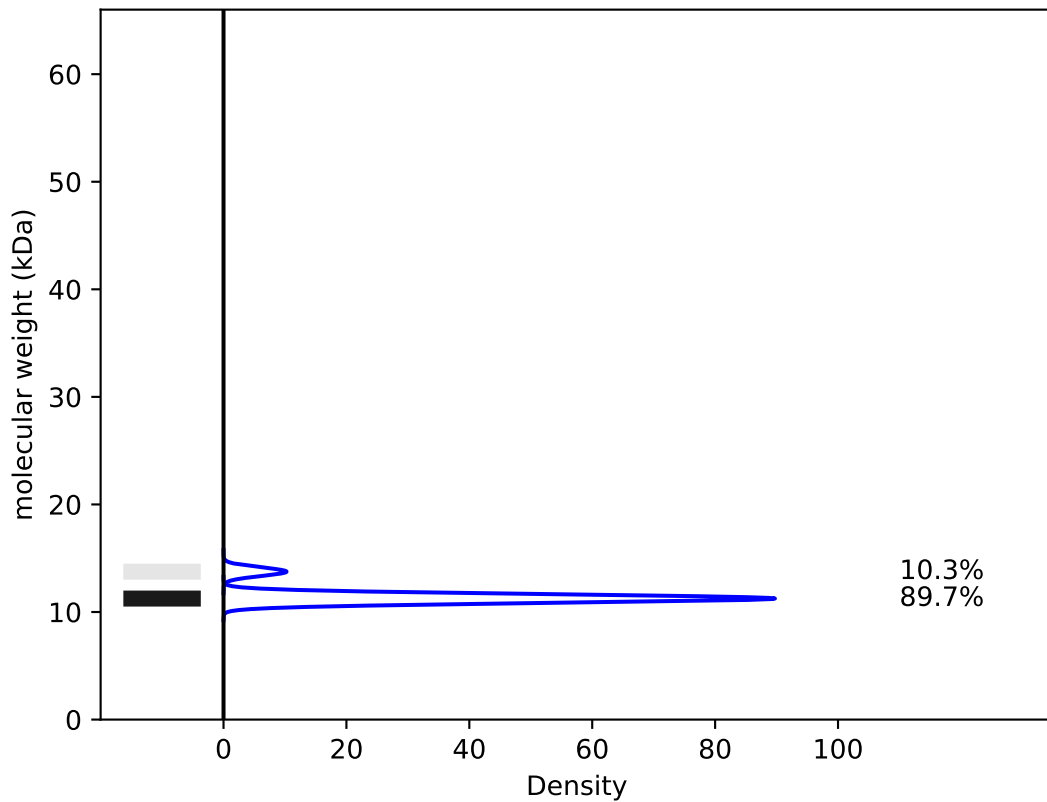



P05198



P05388

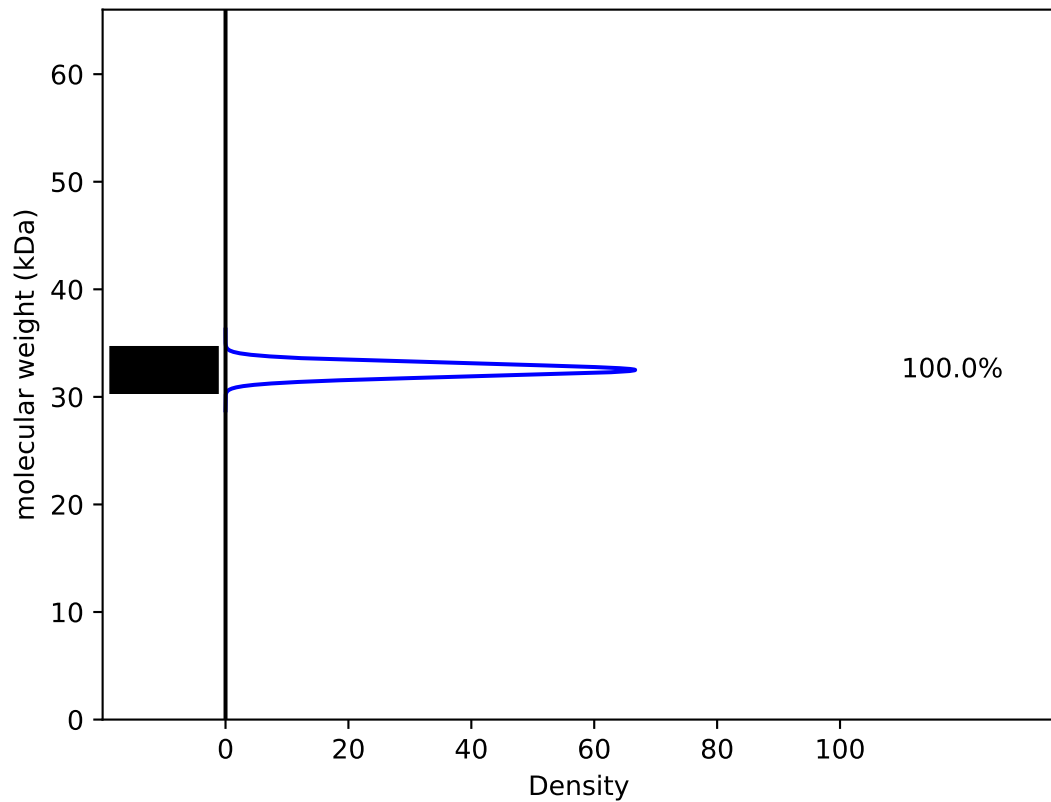

# Q8NHW5



P05412



# P17535



P05455



P05783

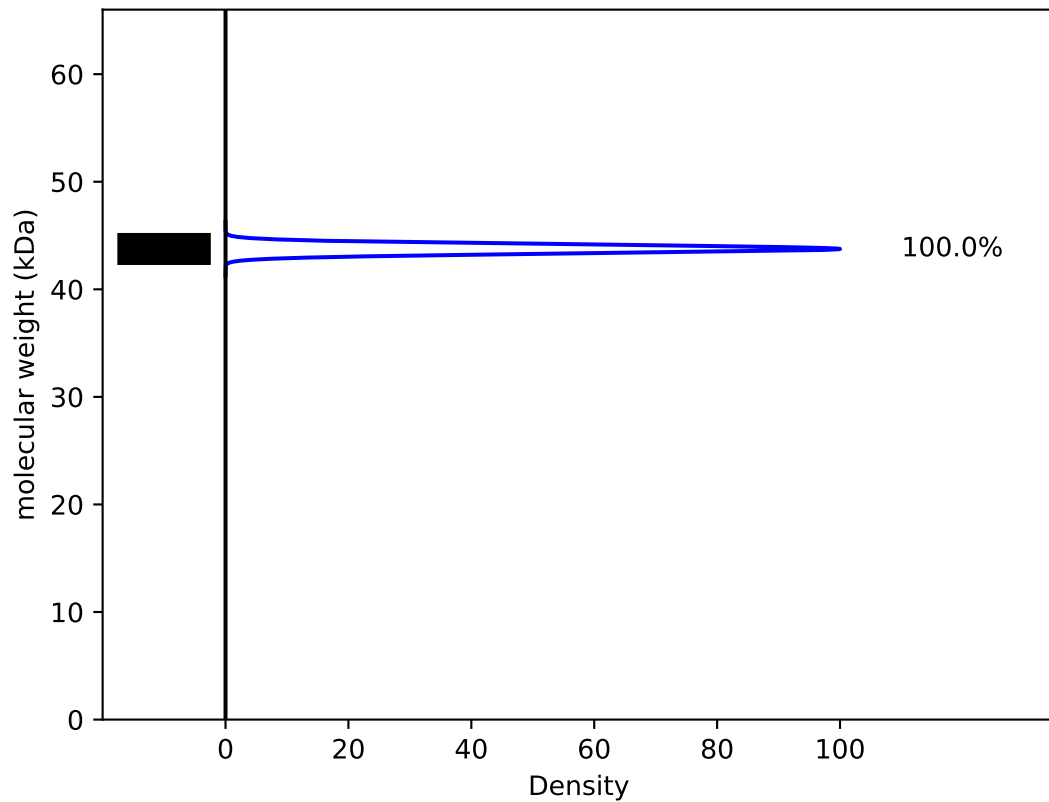

P06132





P06730



# A6NMX2



P06733



# P13929



P06746



P06748

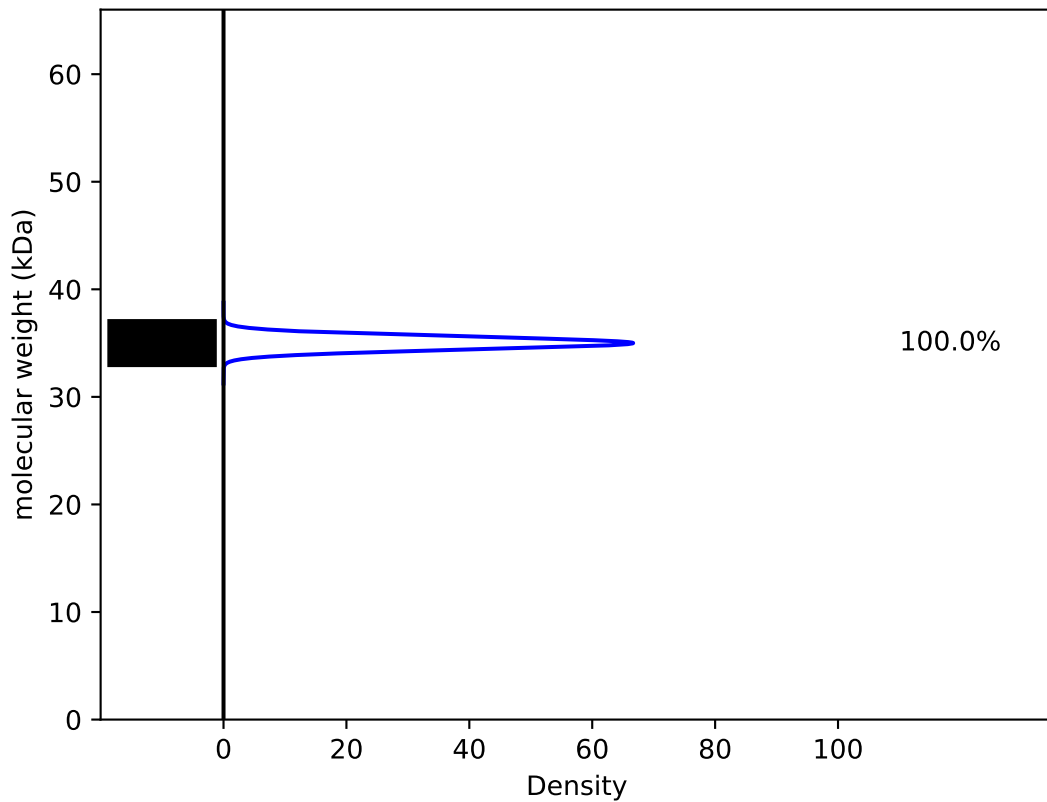

P06753



P07203





P07237



P07305

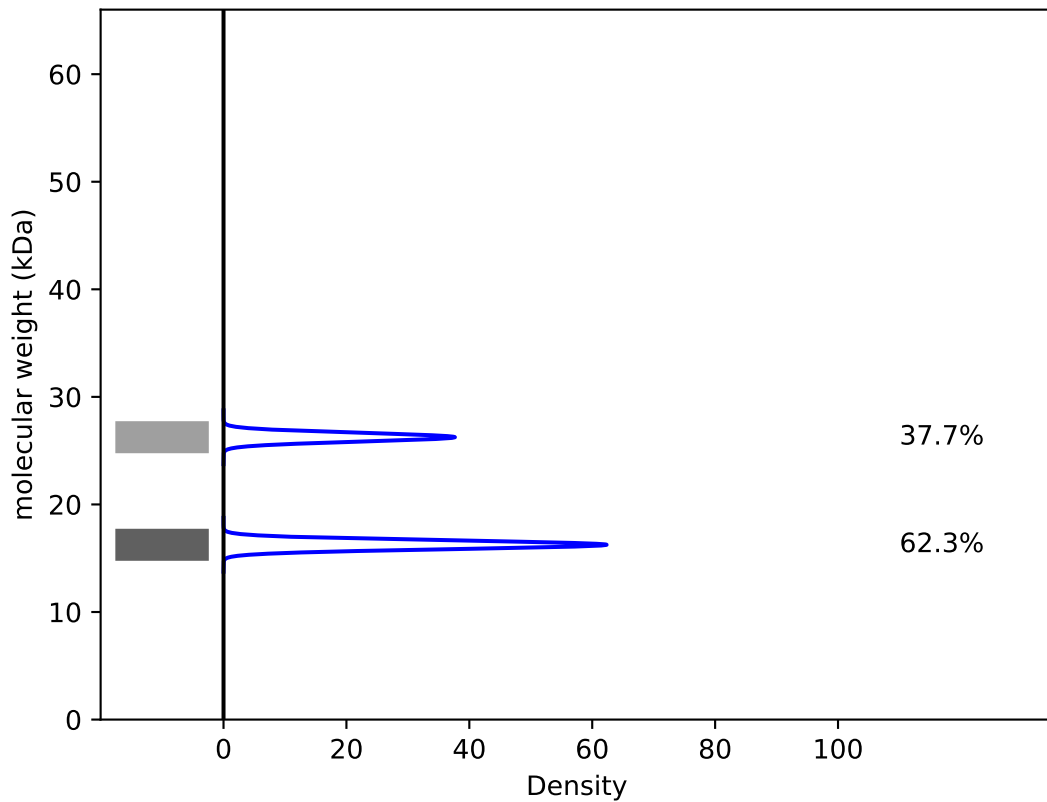

P07311

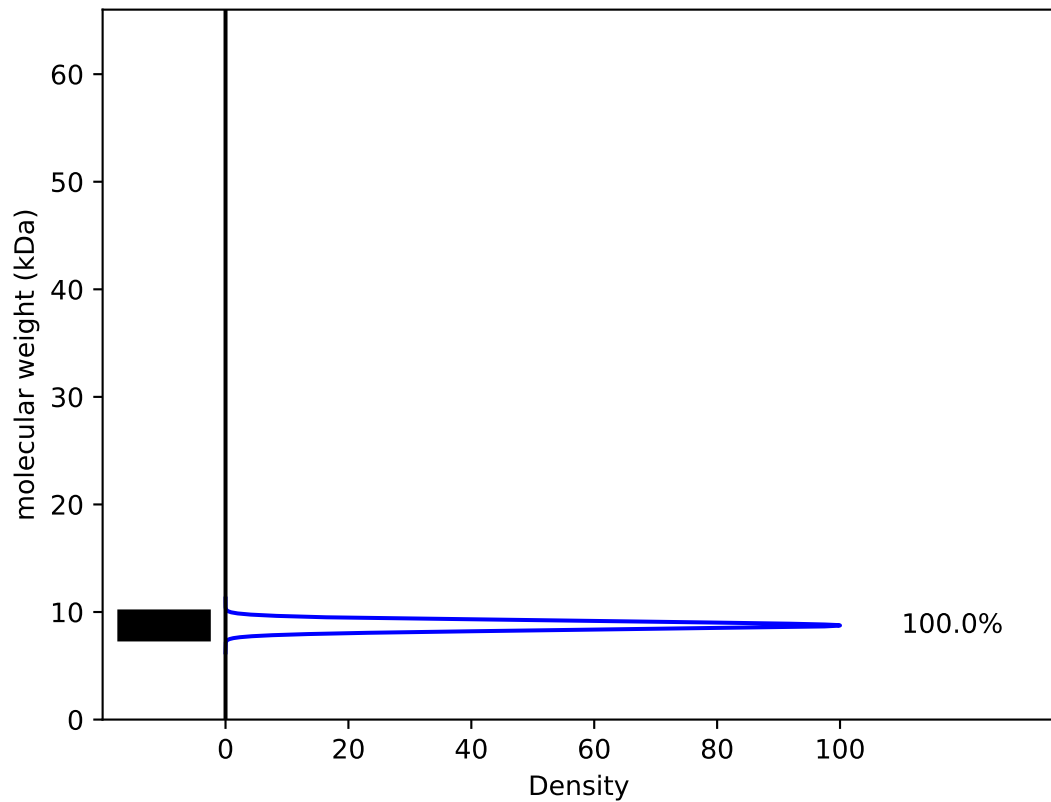

P07355



# A6NMY6



P07437



# A6NNZ2

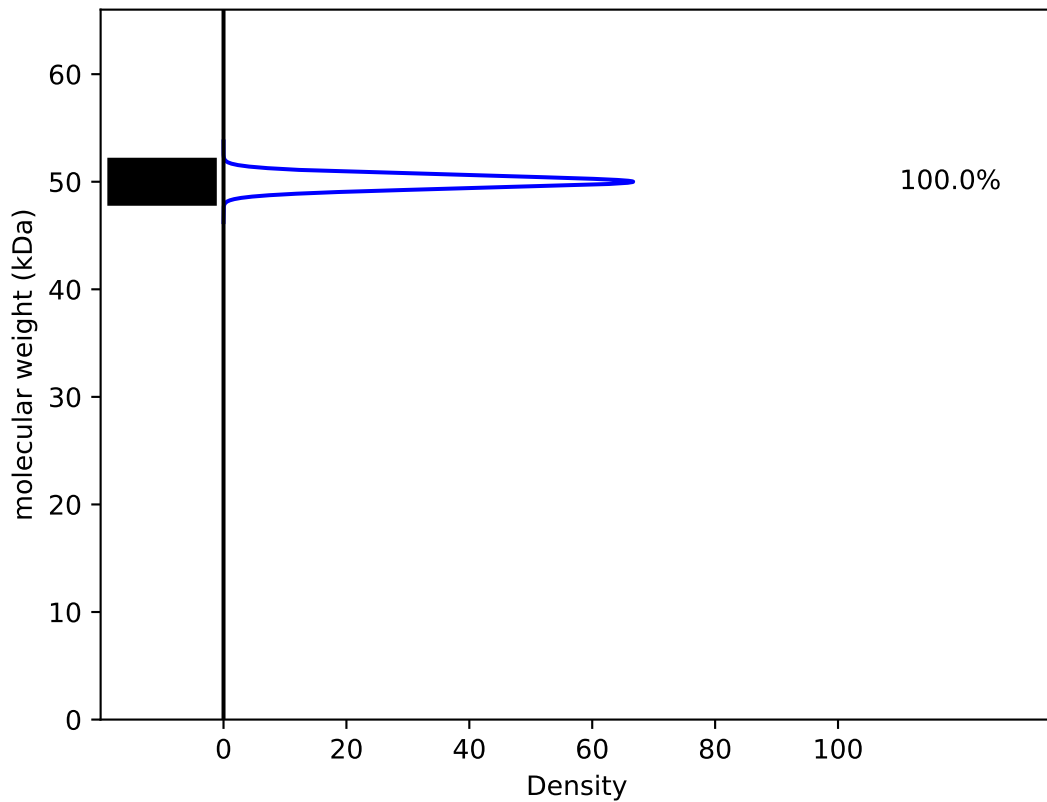

Q9H4B7





P07737



P07741



# Q14568



# Q58FG0



# Q58FG1



P07910



O60812



# B2RXH8

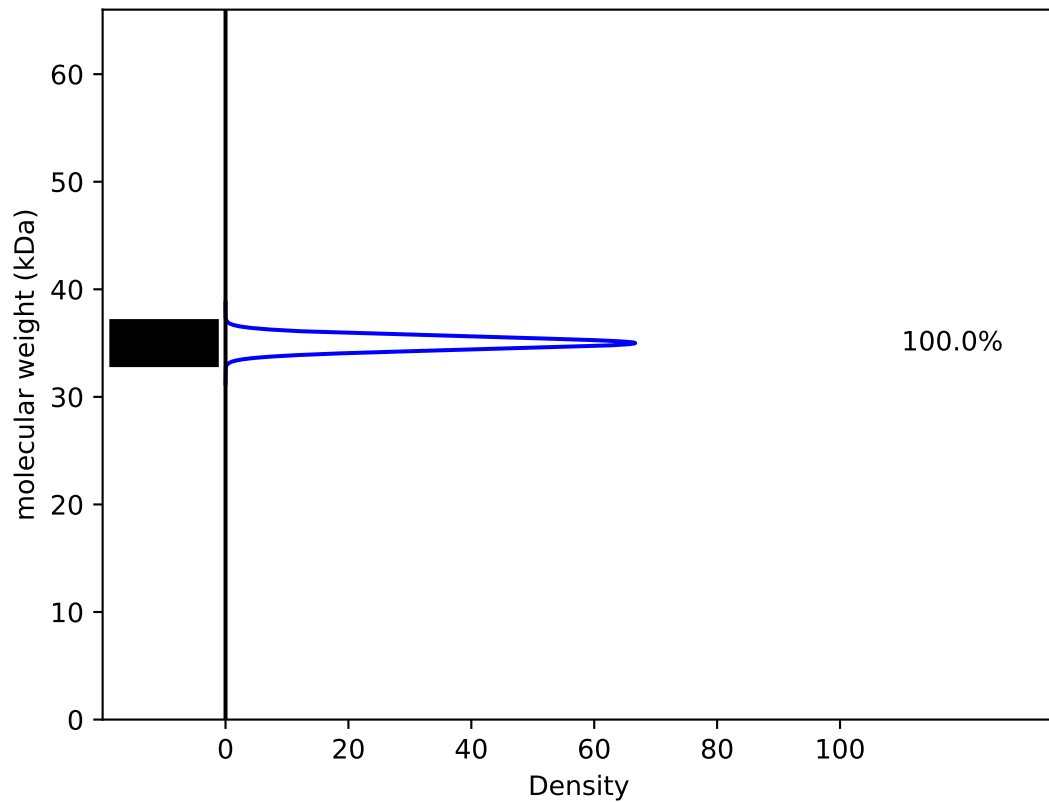



# PODMR1



# B7ZW38



P07948



P08397

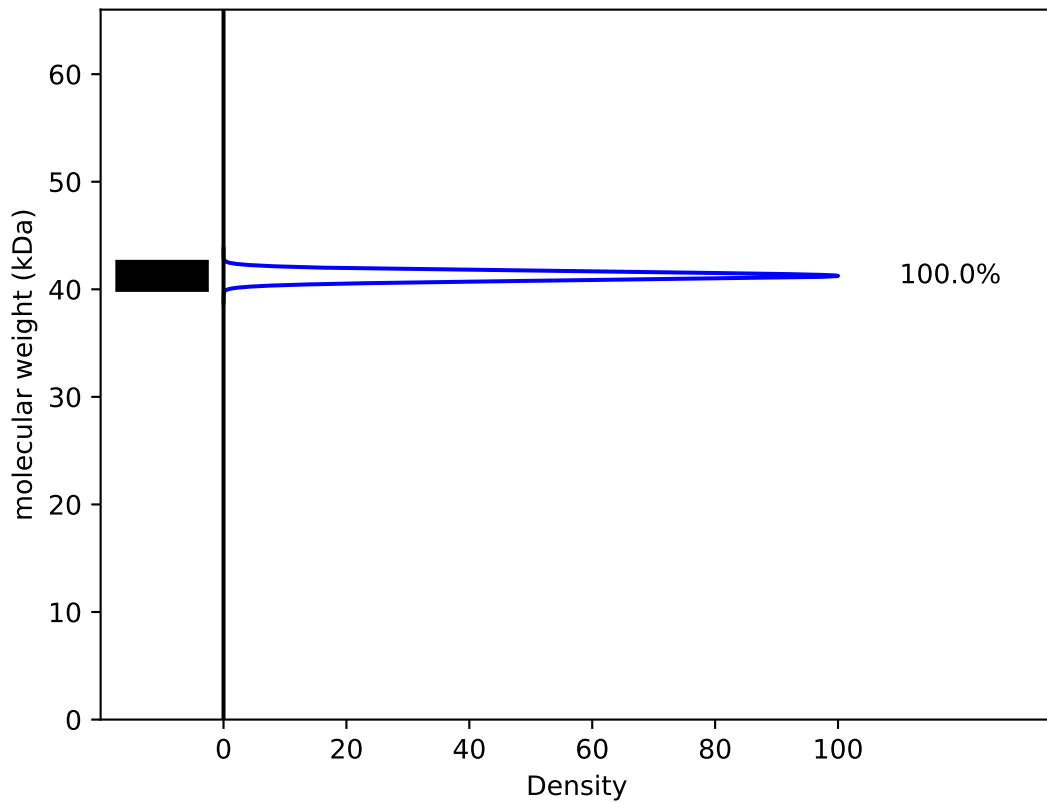

P08559



P29803



P08579



P08670





P17661



P41219



# P14136

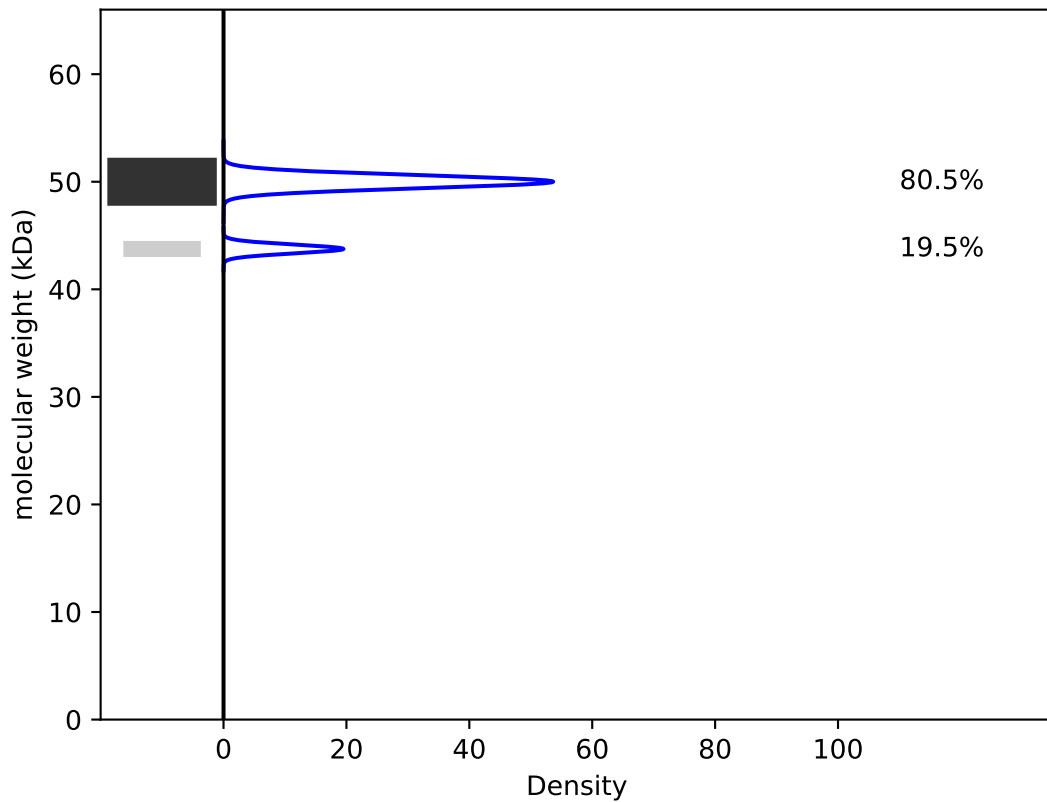

P08708



P08754



P08865



P09012



P09104





P09132



P09211



P09234



P09417



P09429



# B2RPK0



P09622



P09661





P09913



P09914



P09936

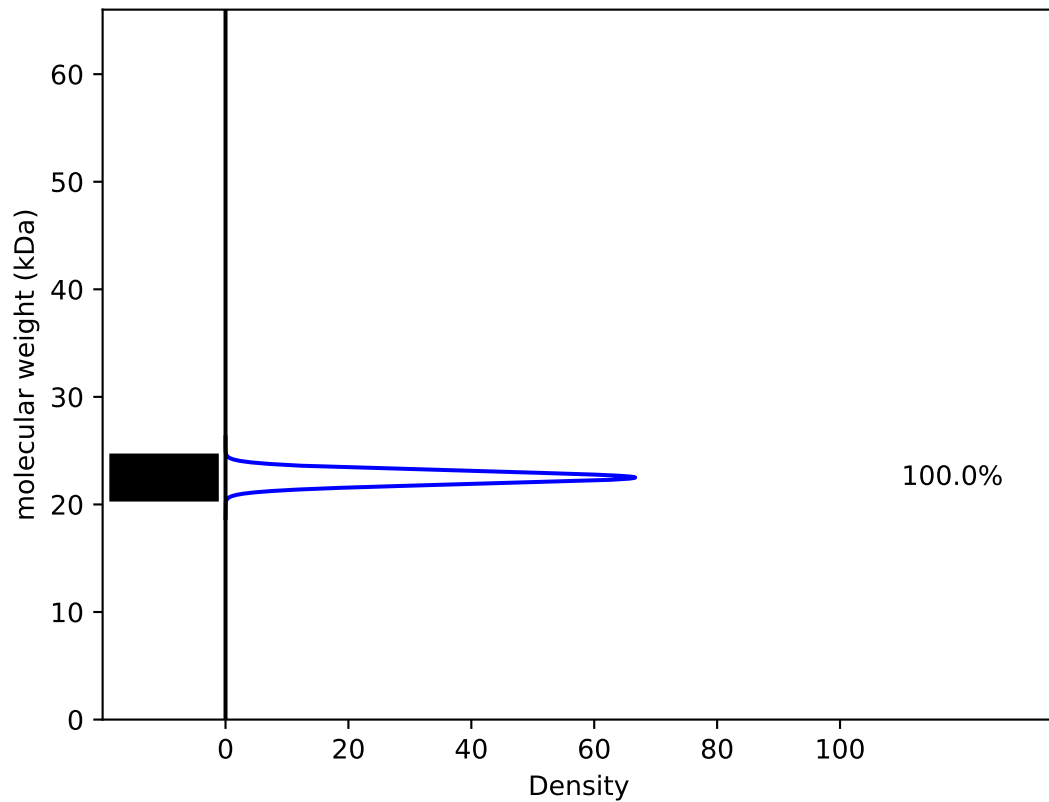

P09972



# Q71UI9



# POC055



Q99878



# Q96KK5





# Q9BTM1



P20671



# POCOS8



# Q01081



# PODN76



# Q8WU68



# P35520

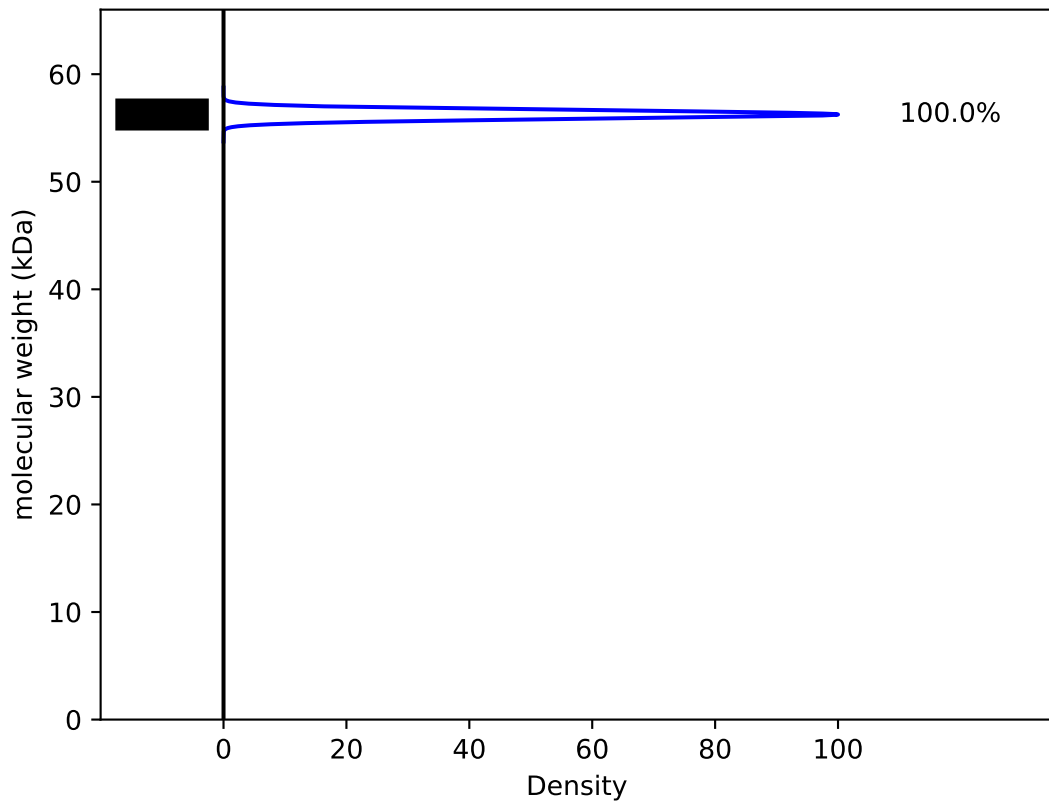

# P0DN79





# P10316

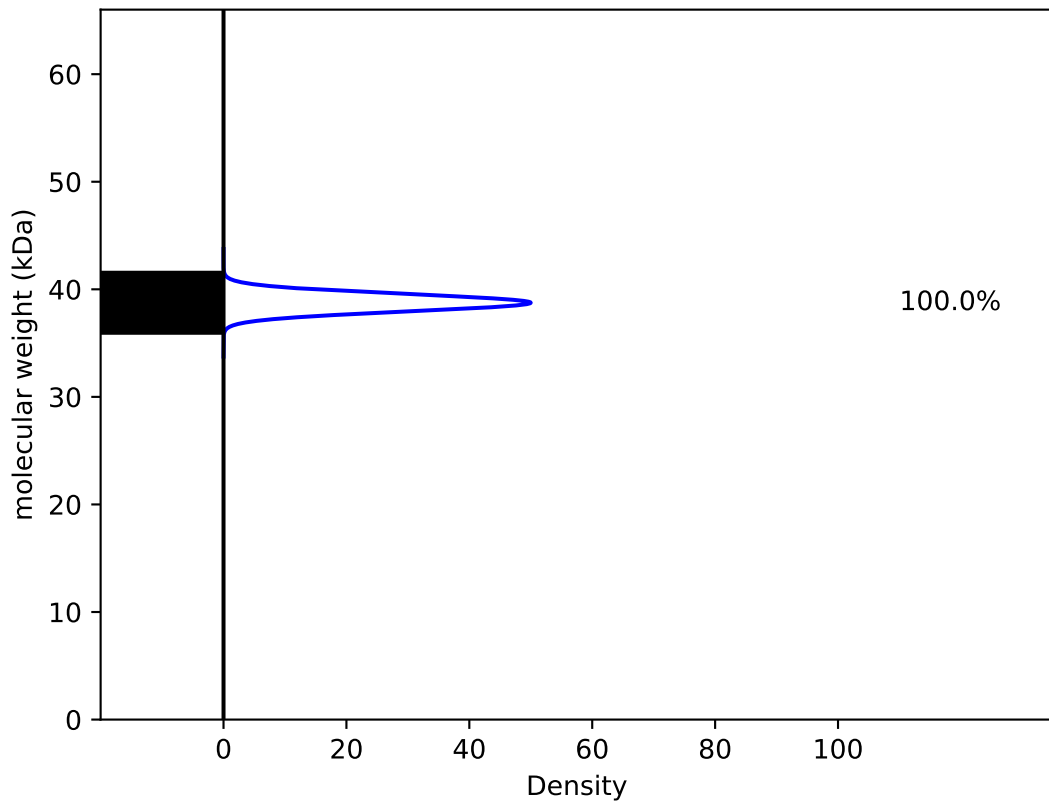

P01891

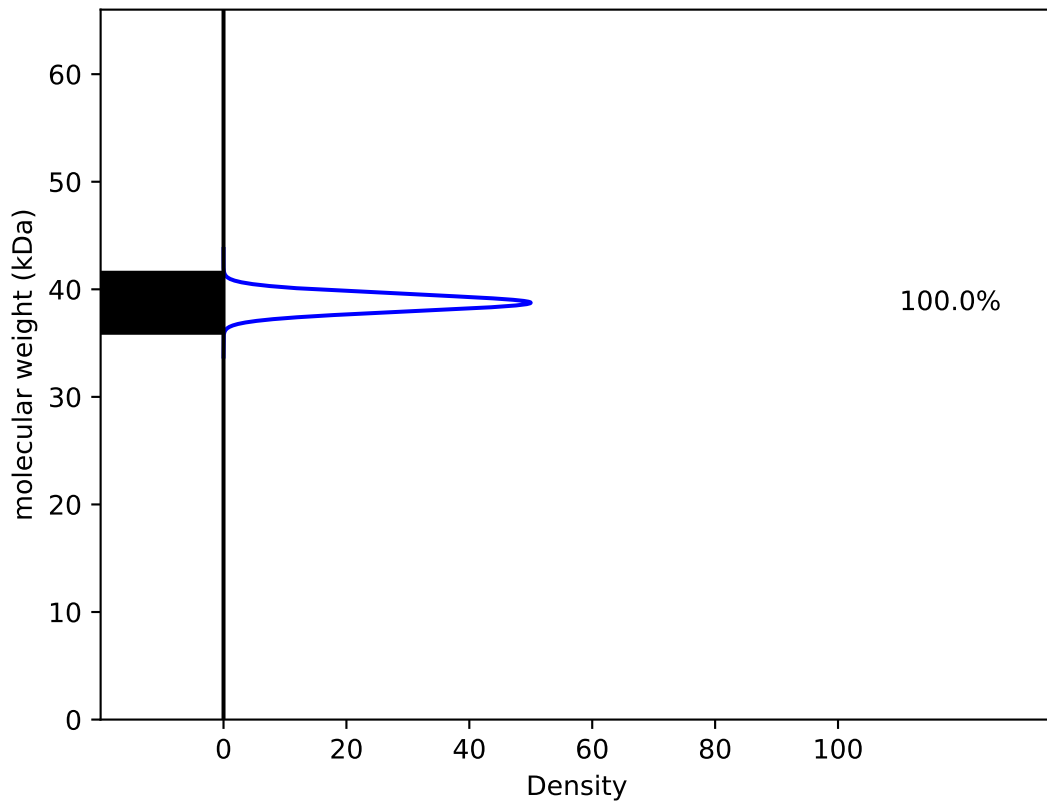

P30453



P30457



# P30450



P18462



P30456

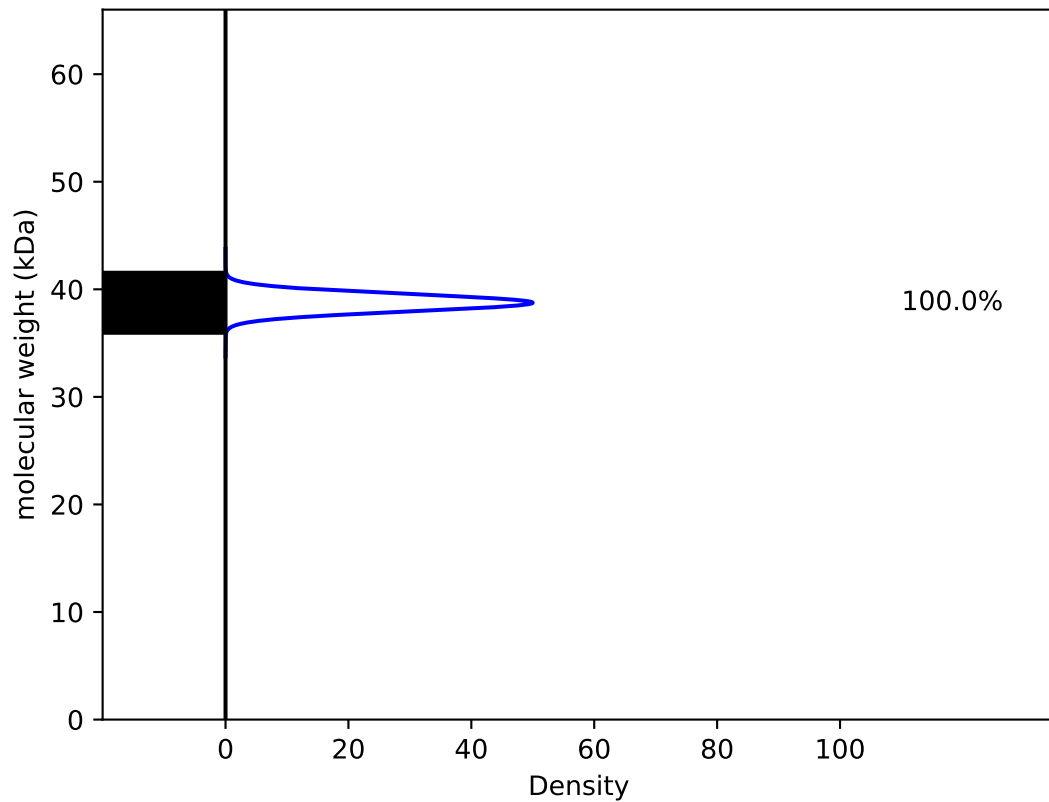

# P16190





# P10321



# P10599

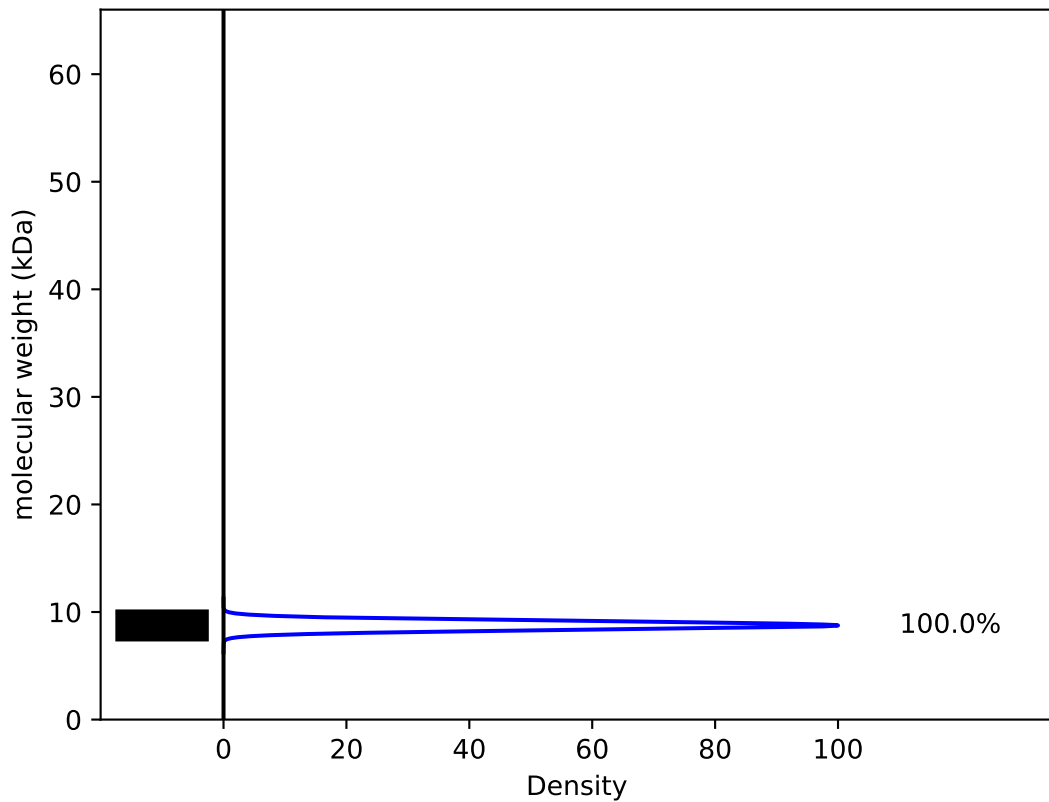

# P10644



# P10768



# P10809



# P11172



# P11182



# P11233





P11234



# P11441



# P11766



# P11802



# P11908

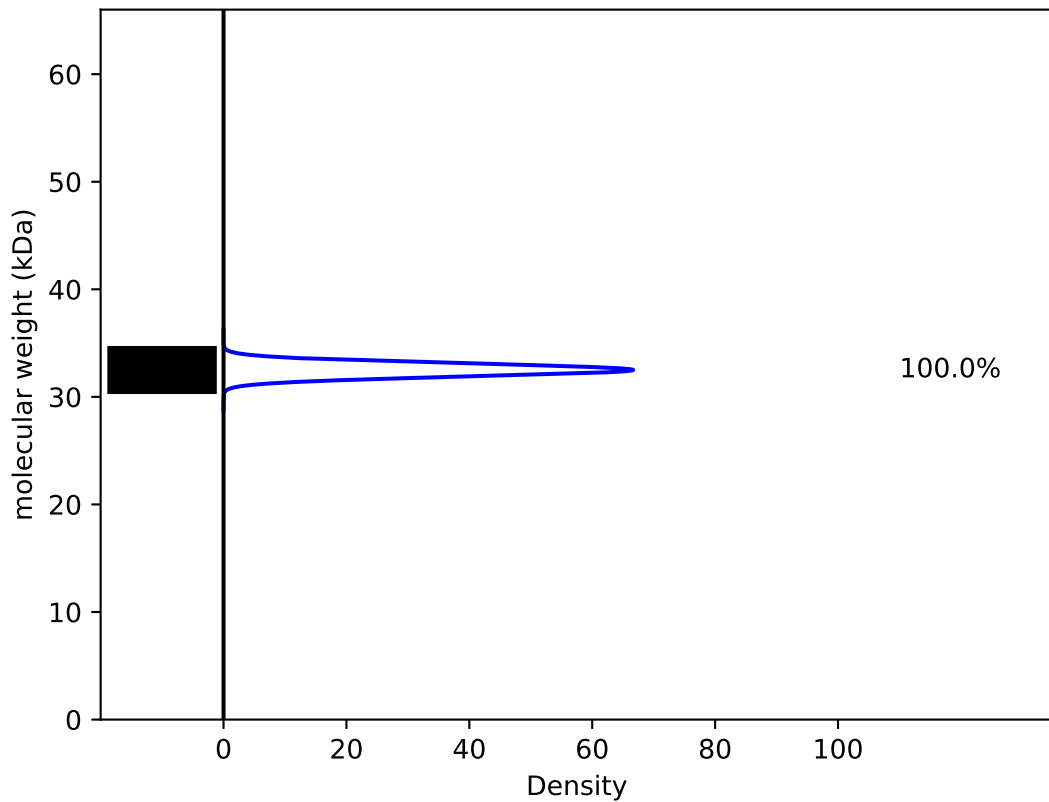

# Q96DU9

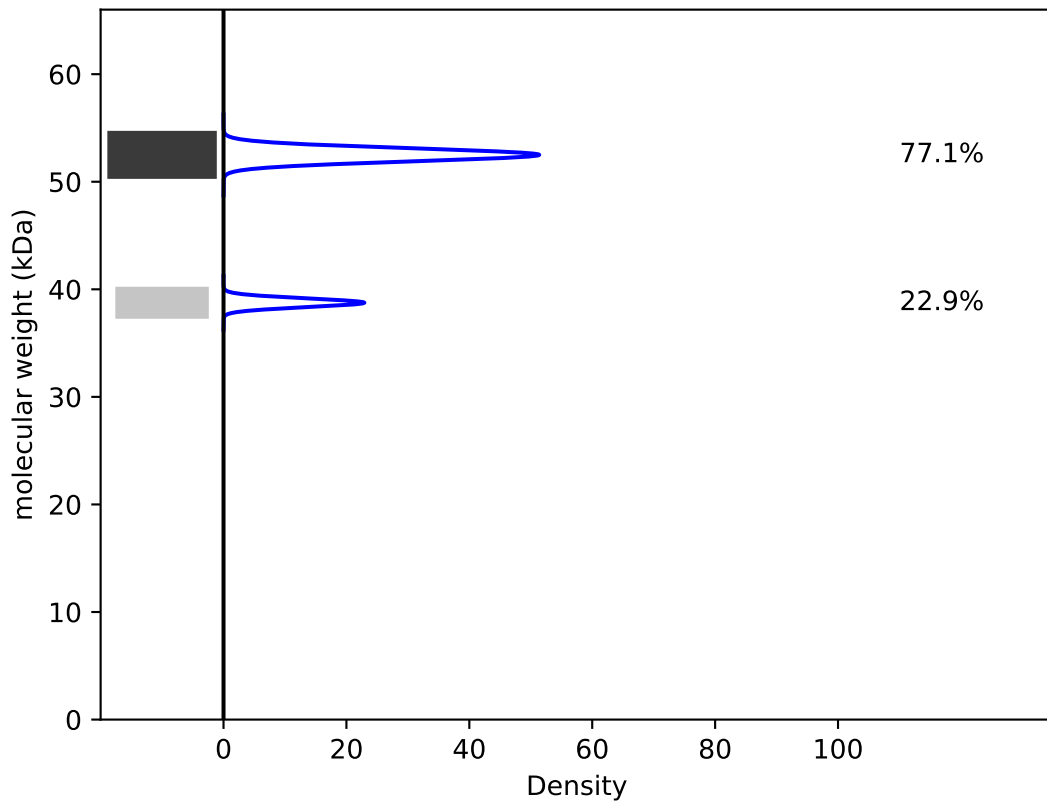

# P12004



# P12235

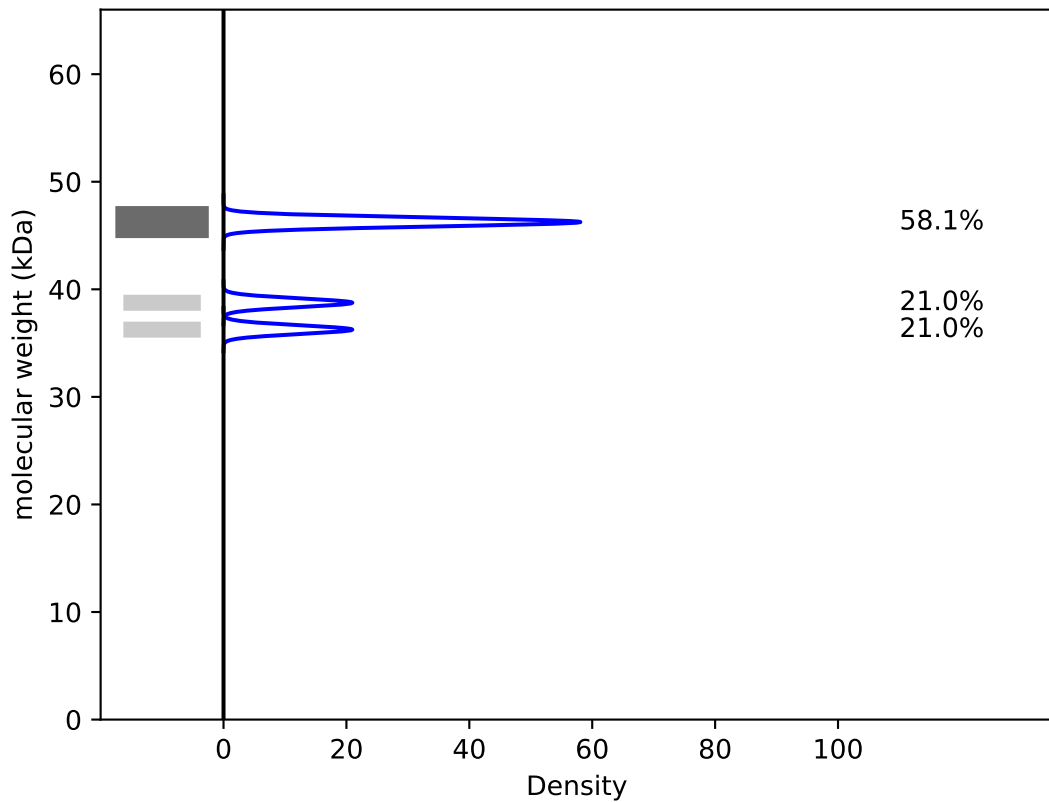



# P12268



P12273



P12277

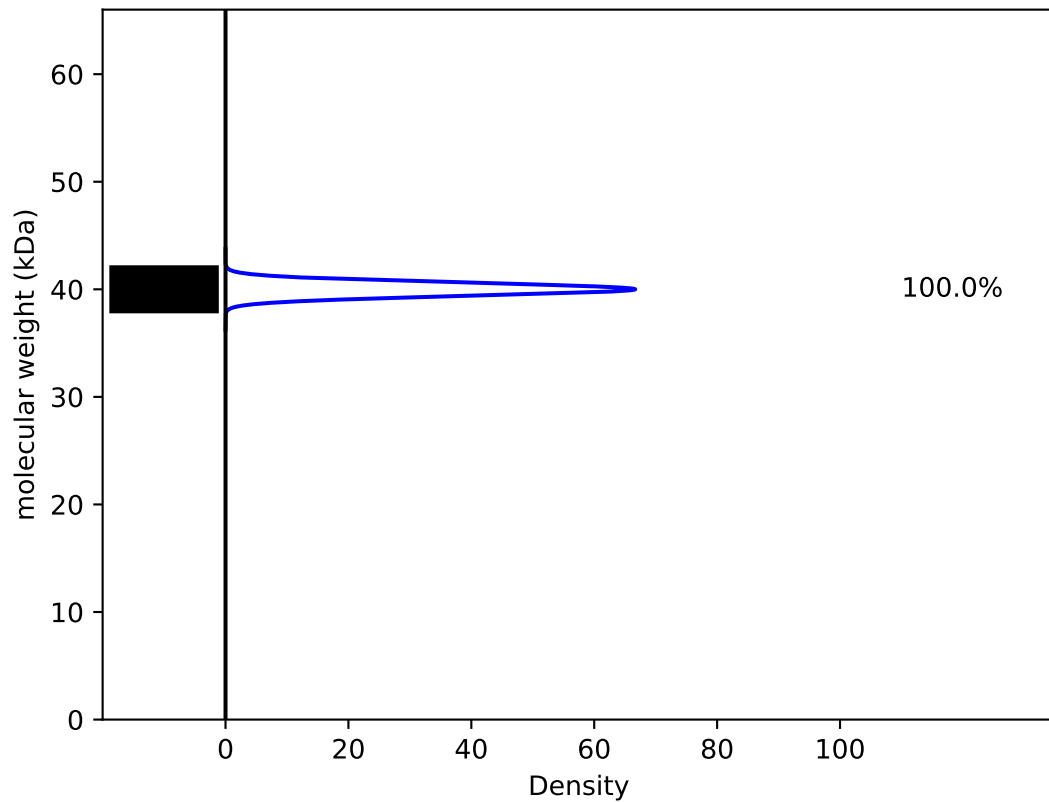

P06239



# P12955

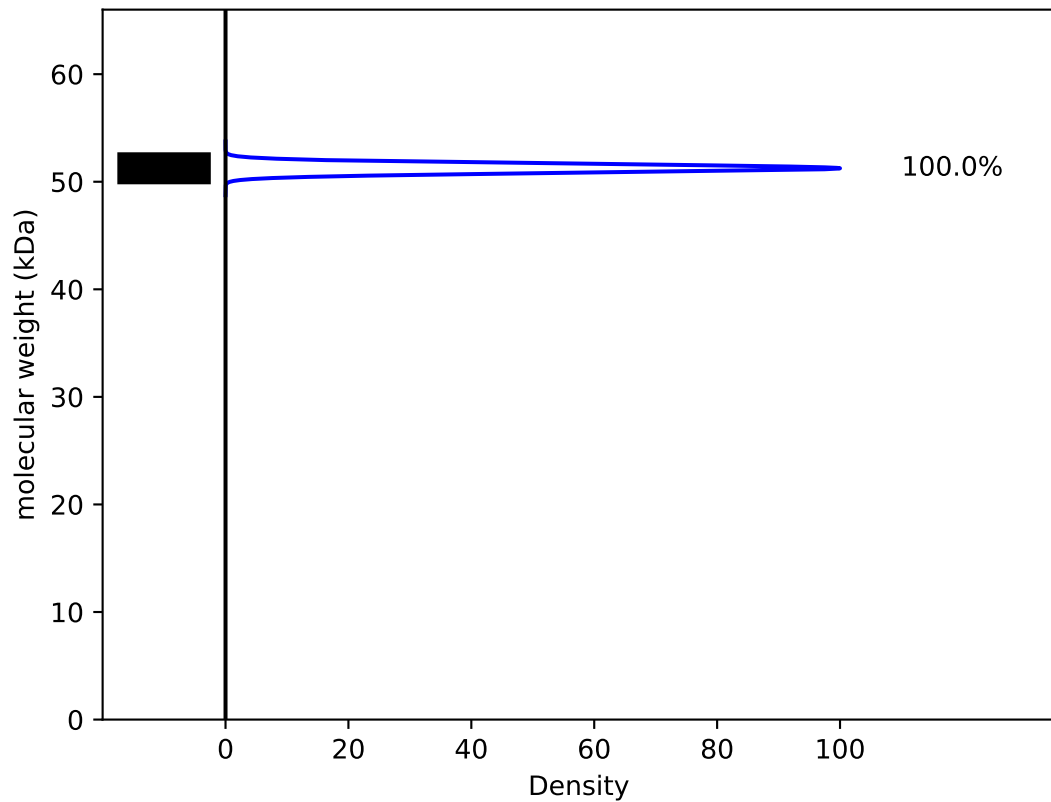

P13674



# P13693



# Q9HAU6





# Q56UQ5



# P13861



# P13984



# P13995



# P14174



# P14550

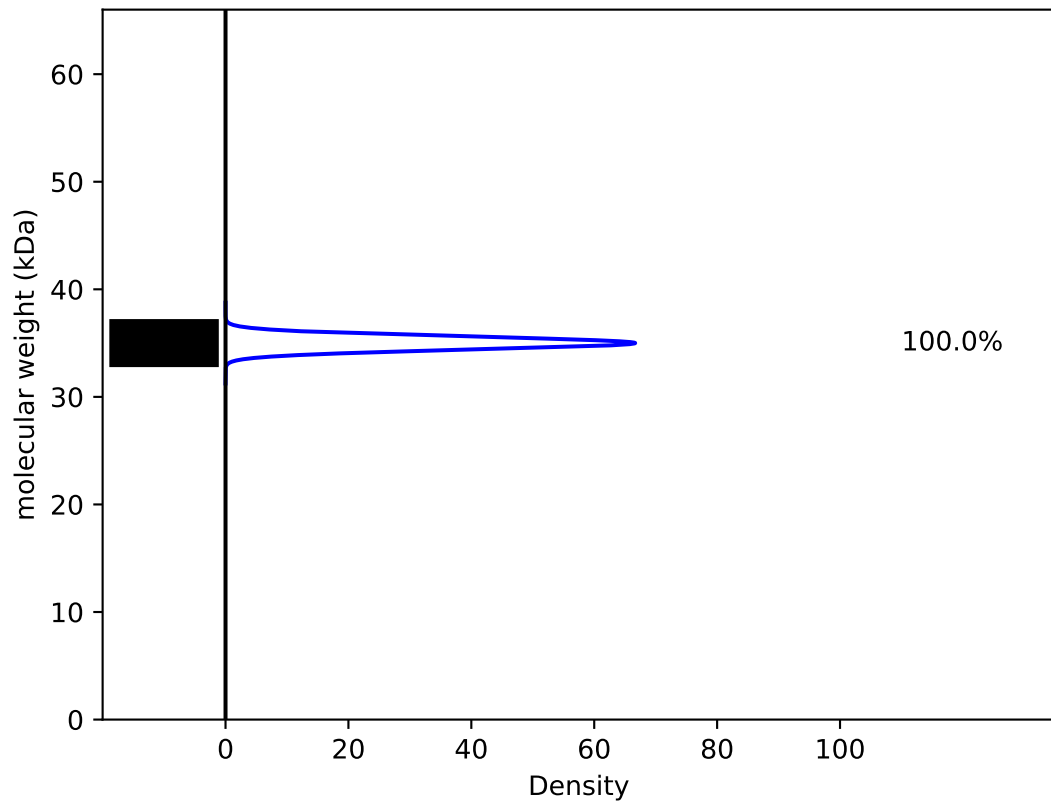

# P14618



P14635





# P63162



# P14678



# P14927



# P15104

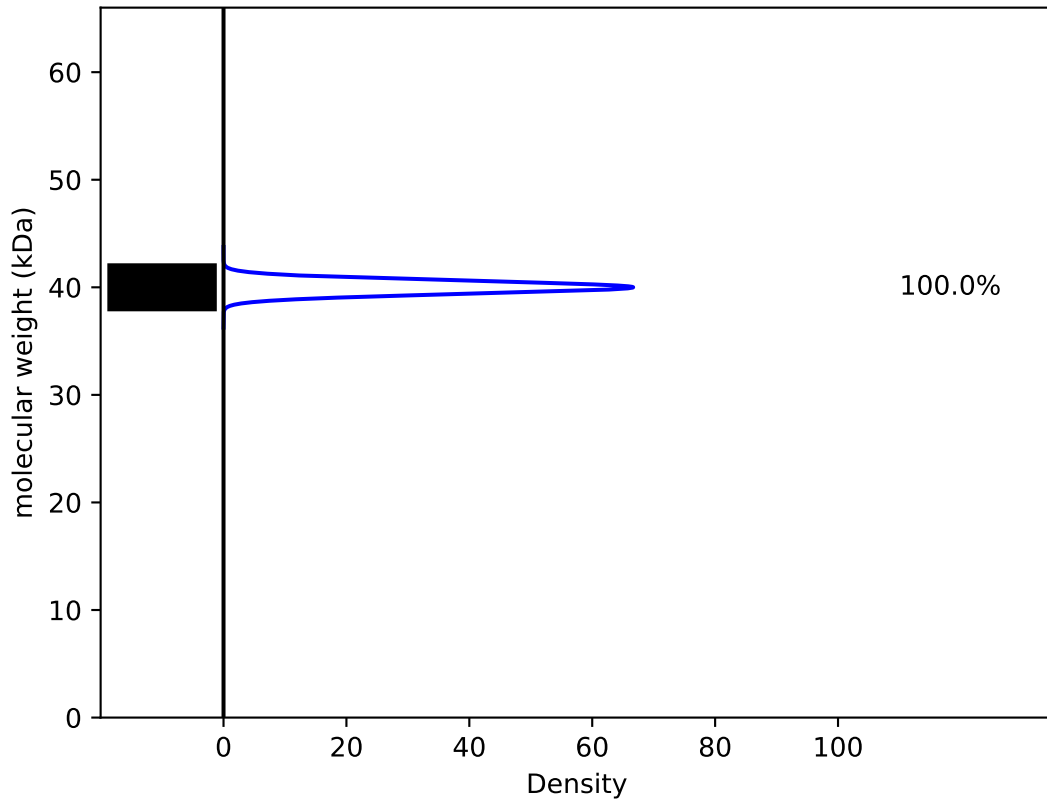

P15121



# C9JRZ8

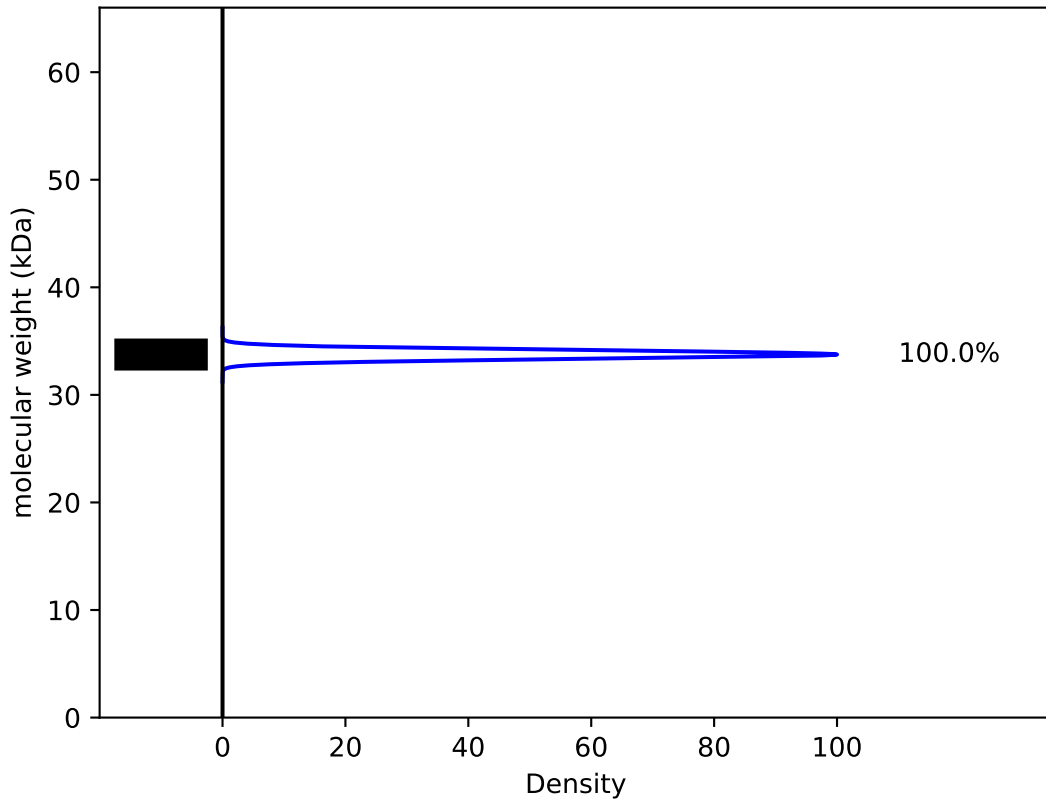

# P15170

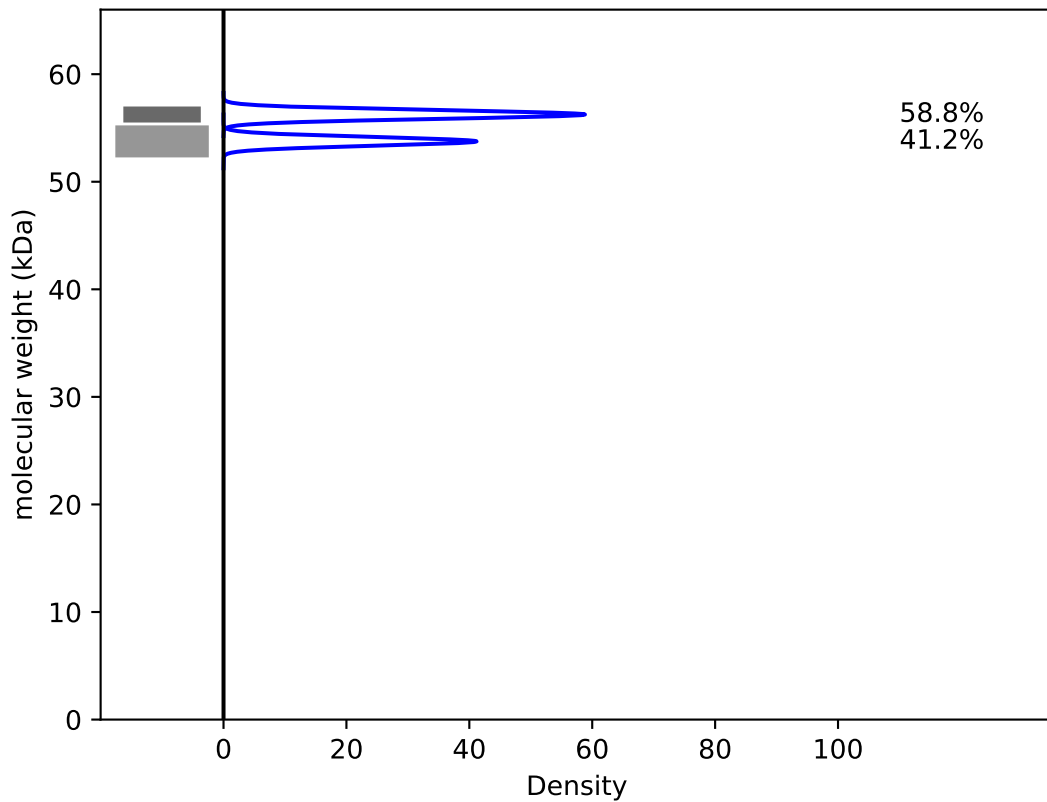

P15374





# P15531

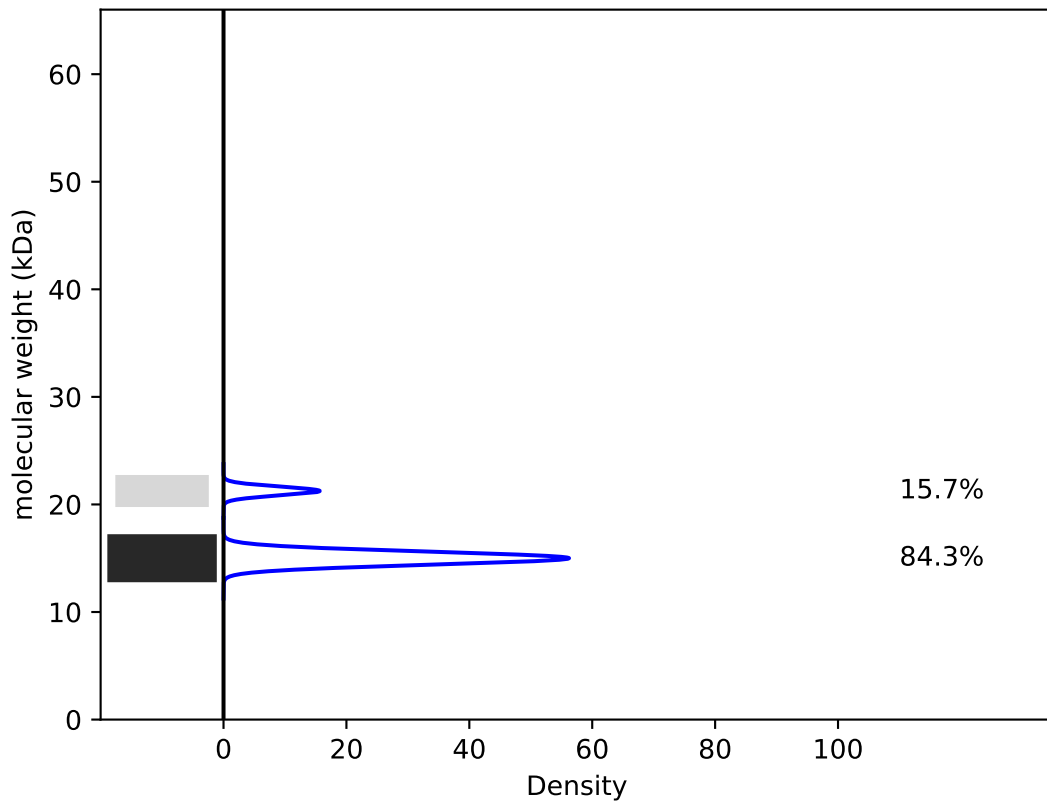

# P15880



# P15927



# P16083



# P16104

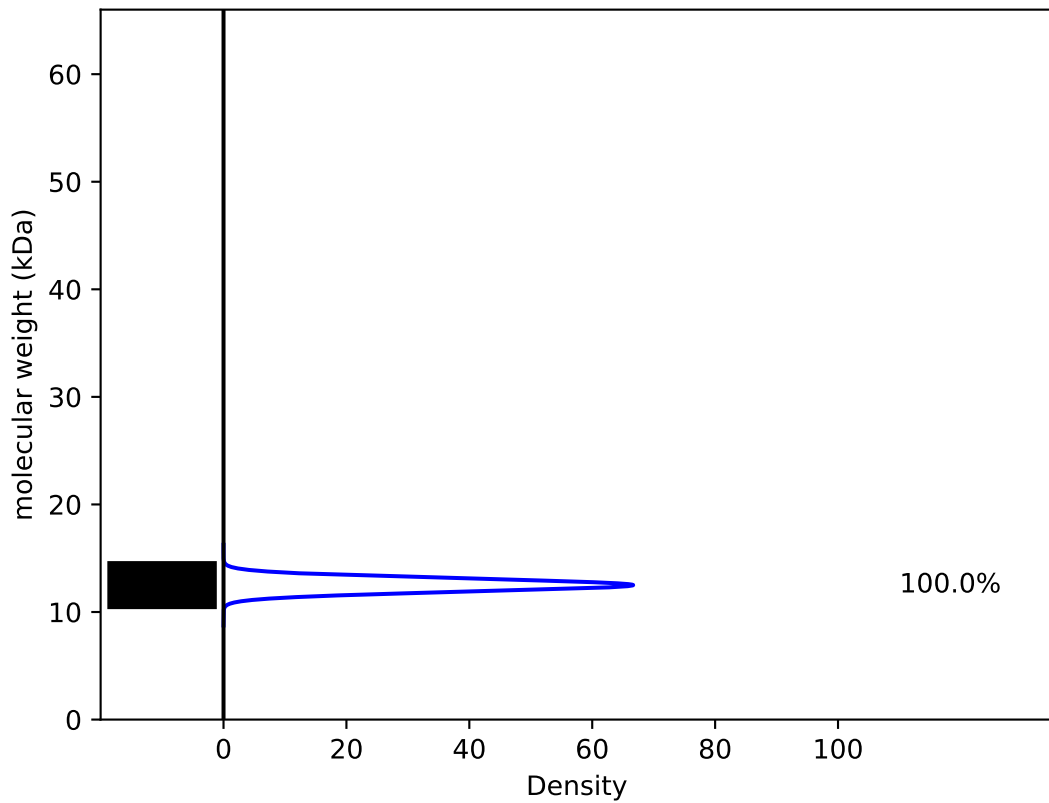

# Q96QV6

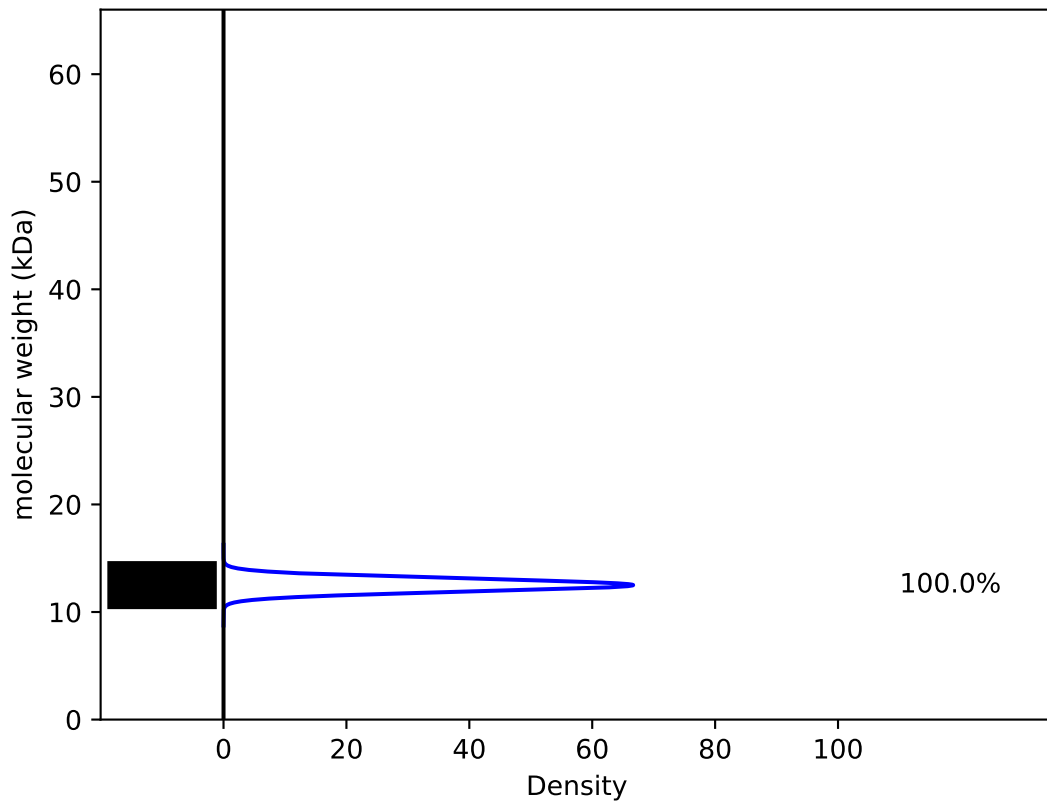

# P16152



# P16220





# P16333



O43639



# P16403



# P16949



# P16989

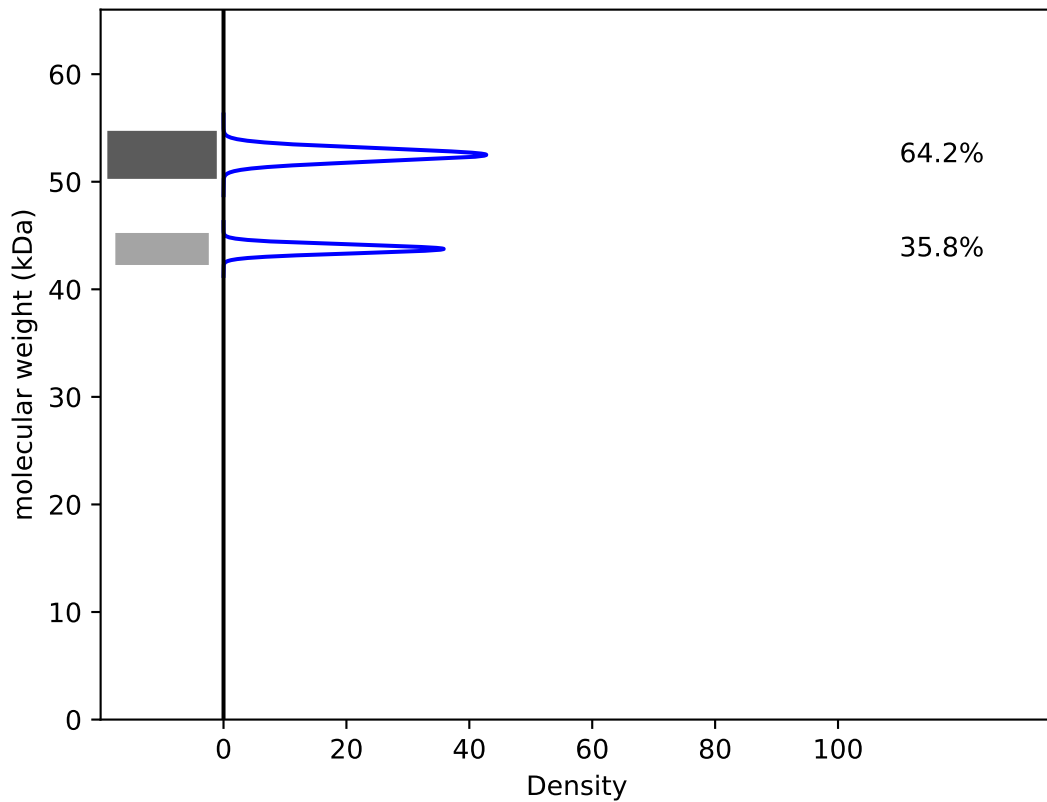

# Q9Y2T7

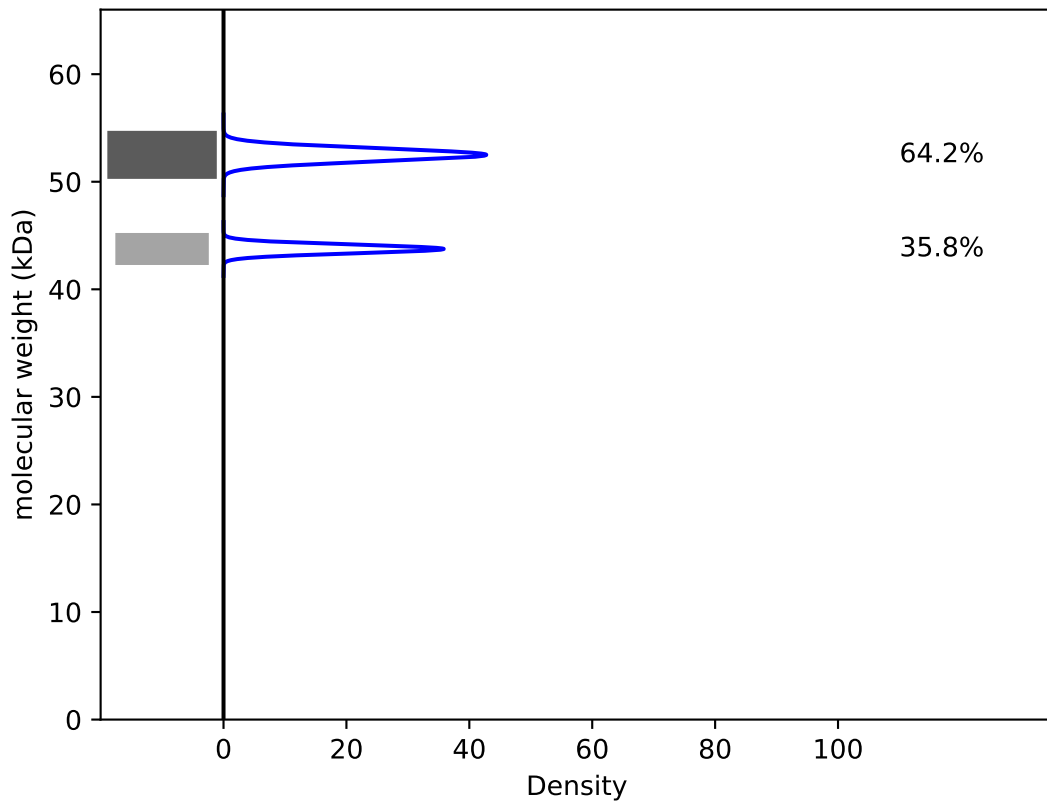

# P17028



# P17152





# P17568



# P17612



# P17931



# P17980



P17987

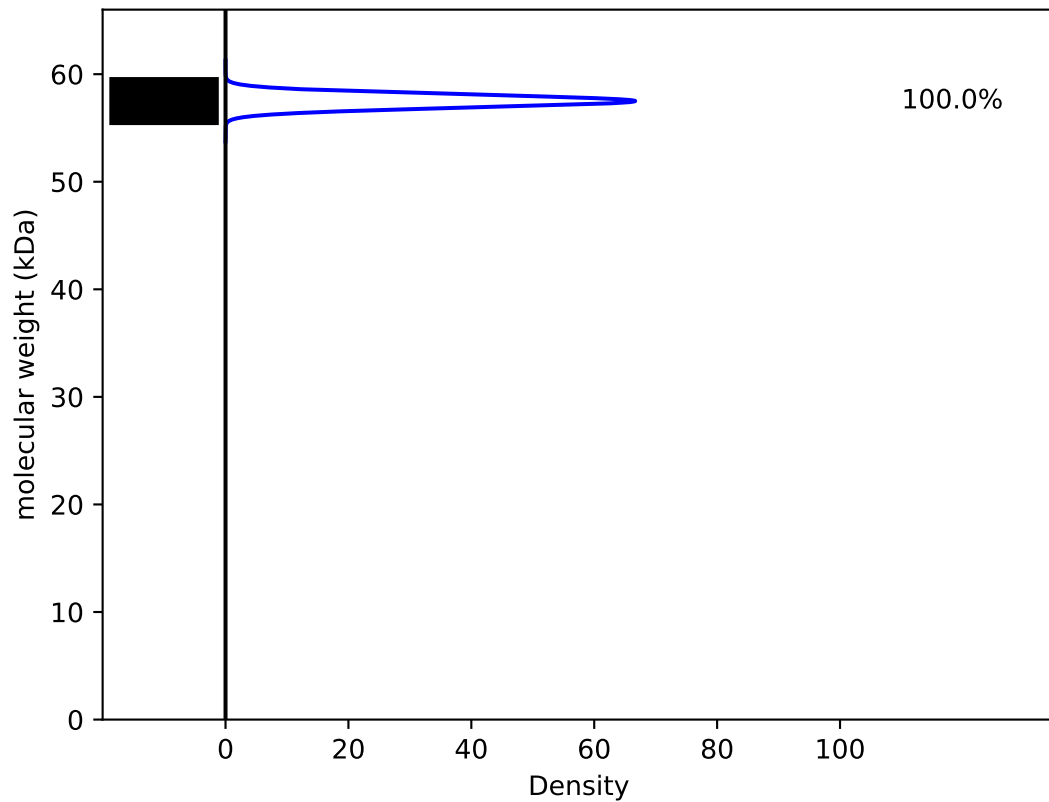

# P18031

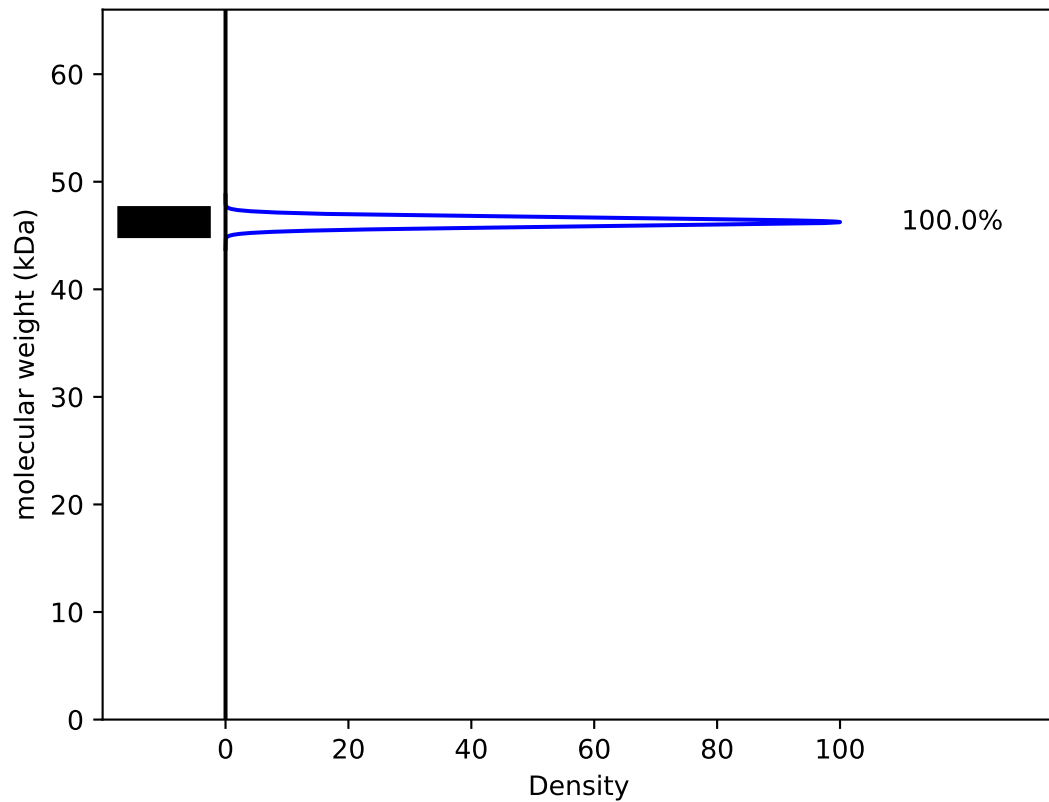

# P18077



# P18085





# P18124



# P18621



# P18754



# P18847



# P19387



# P19388



P19623



# P19784





# P20338



P20339



# P20340



# Q9NRW1



# Q14964



# P21266



P46439



P21796

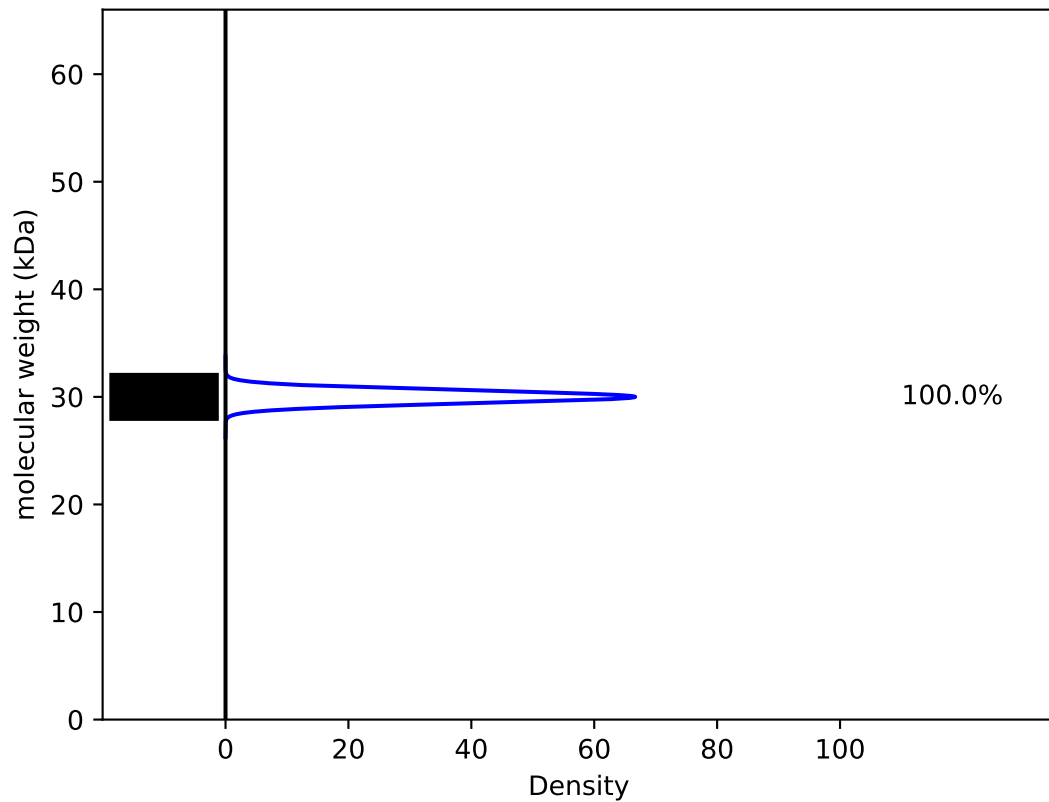



# P21964



P22061



P22087



P22392

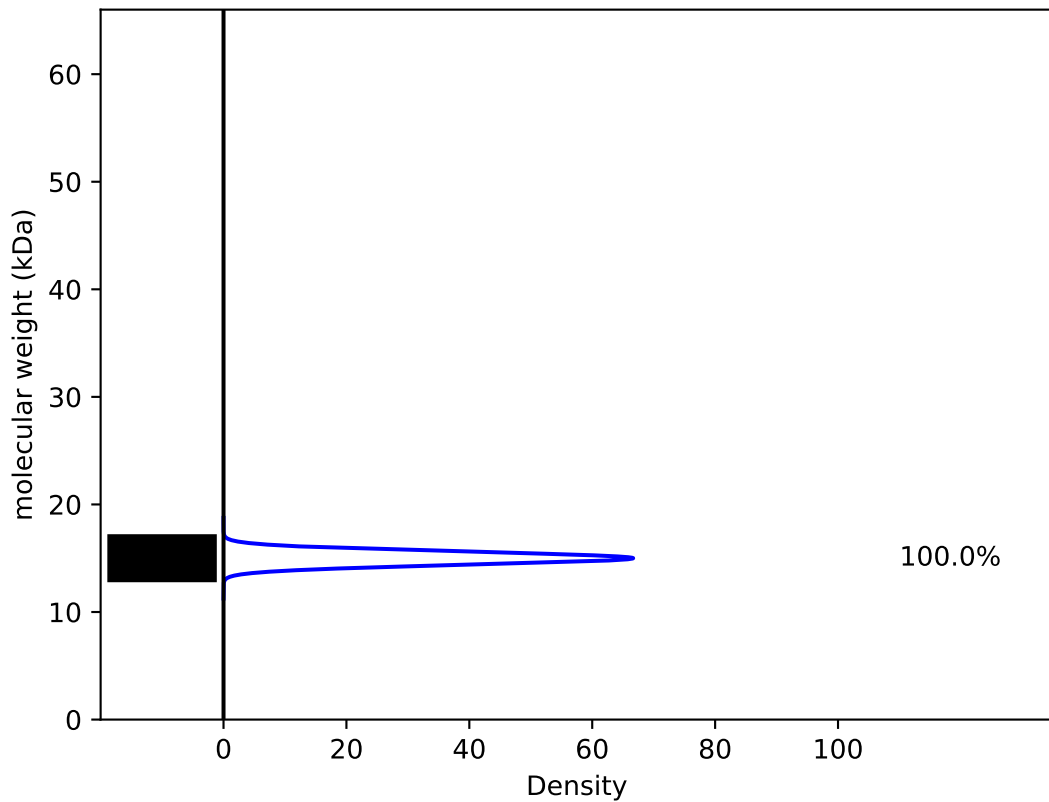

O60361

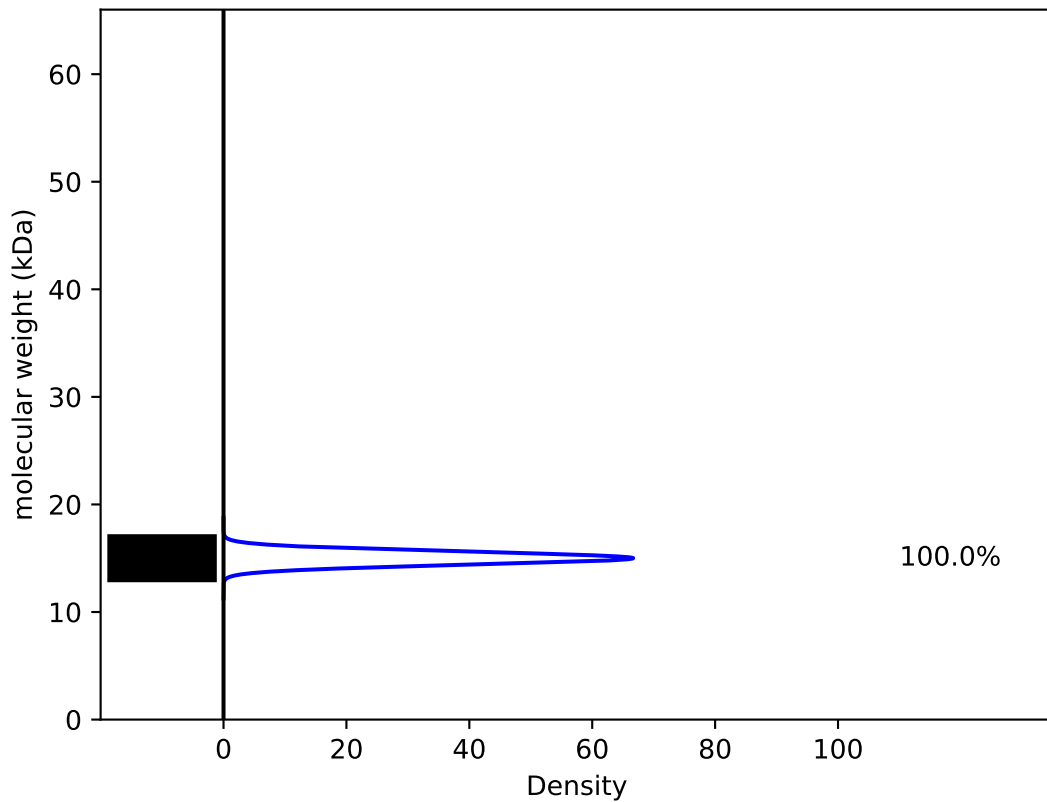

P22626



# P23193

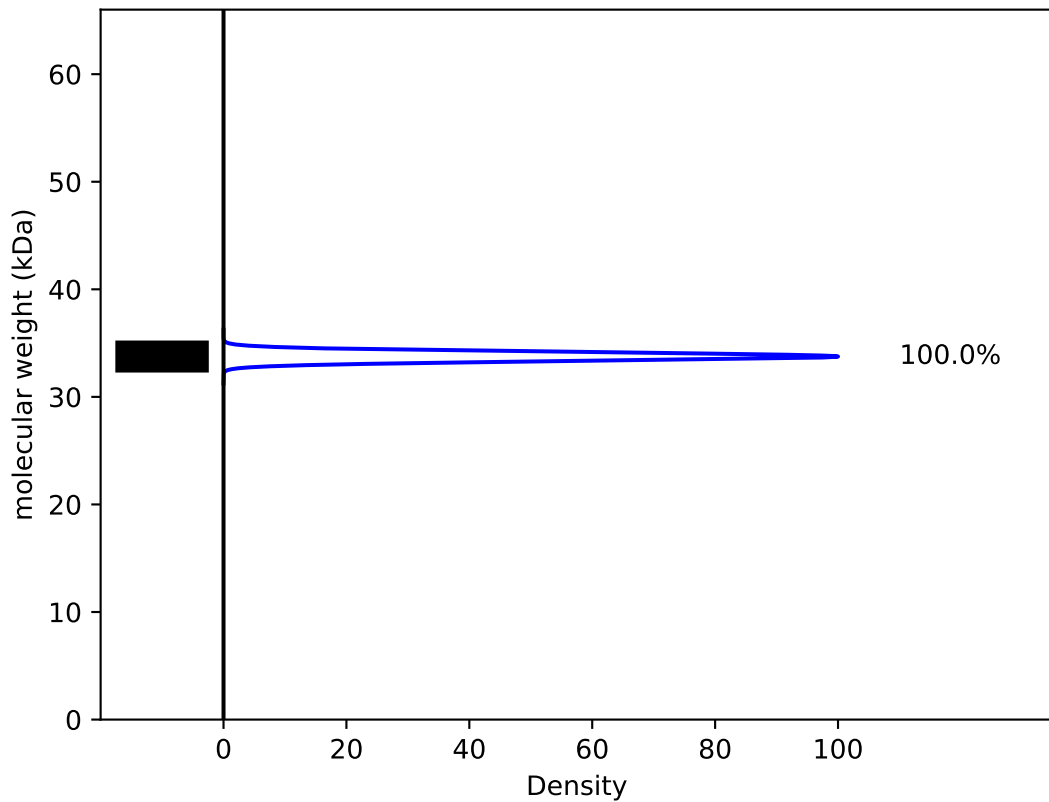

# Q15560





P23381



P23396



# Q16778



P33778



P23527



# Q8N257



# Q96A08



P23528





# P23919



P24534



P24666



P25325



P25398



P25685



# P25786



# P25787





# P25788



# P25789



P26368



P26583



# P26885



P27144



P27348



P27361

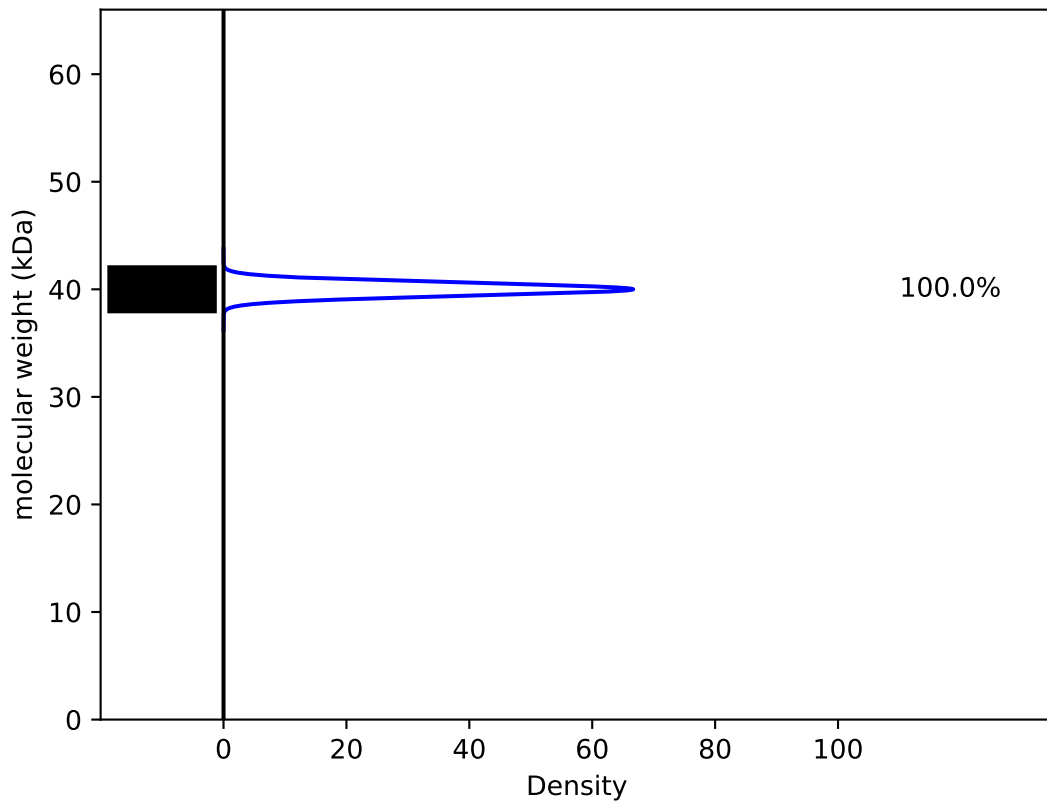



P27635



# Q96L21



P27695



P27707



# P27797

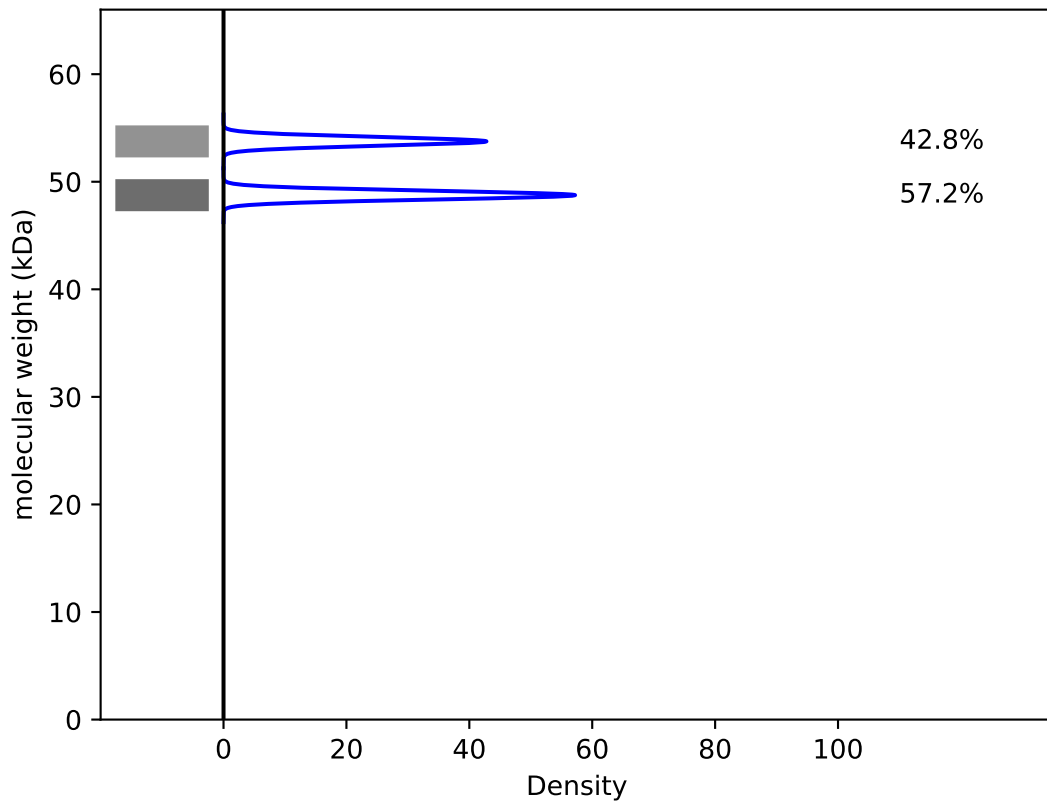

# P28066



P28072



# P28161





Q03013



P09488



P28482



P28676



# P29218



P29372



P29373



P29692





P30041



P30043



P30046

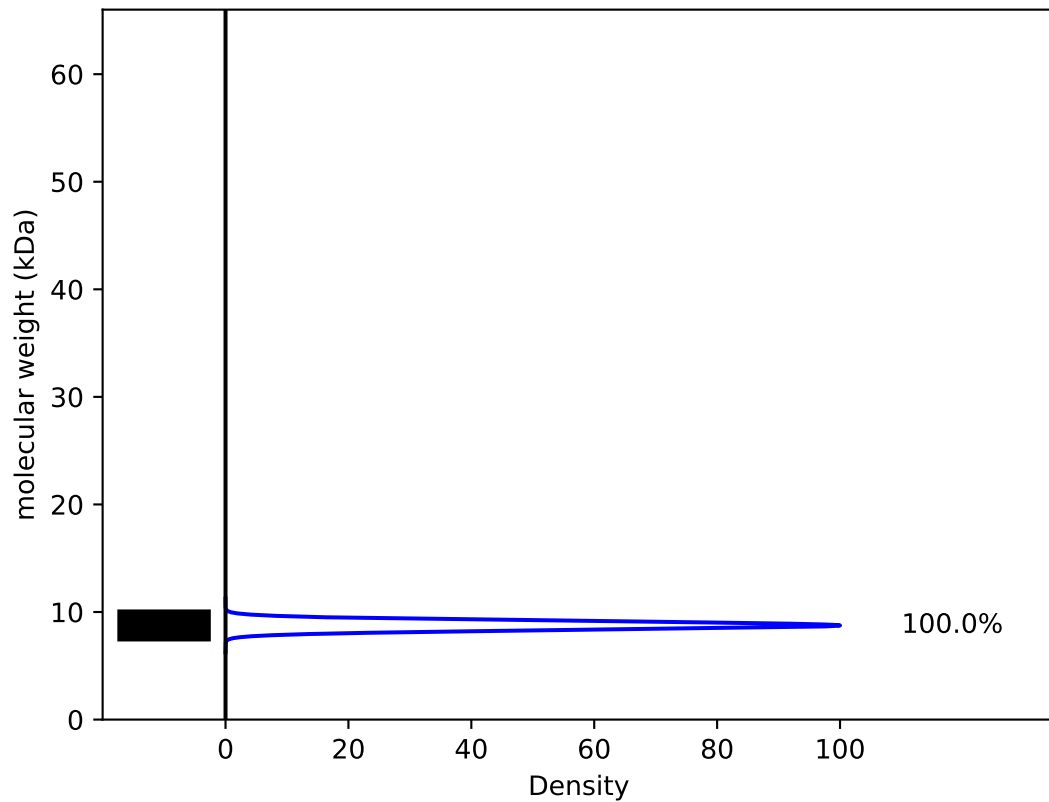

# P30050



# P30085



P30086



# P30101



# P30419

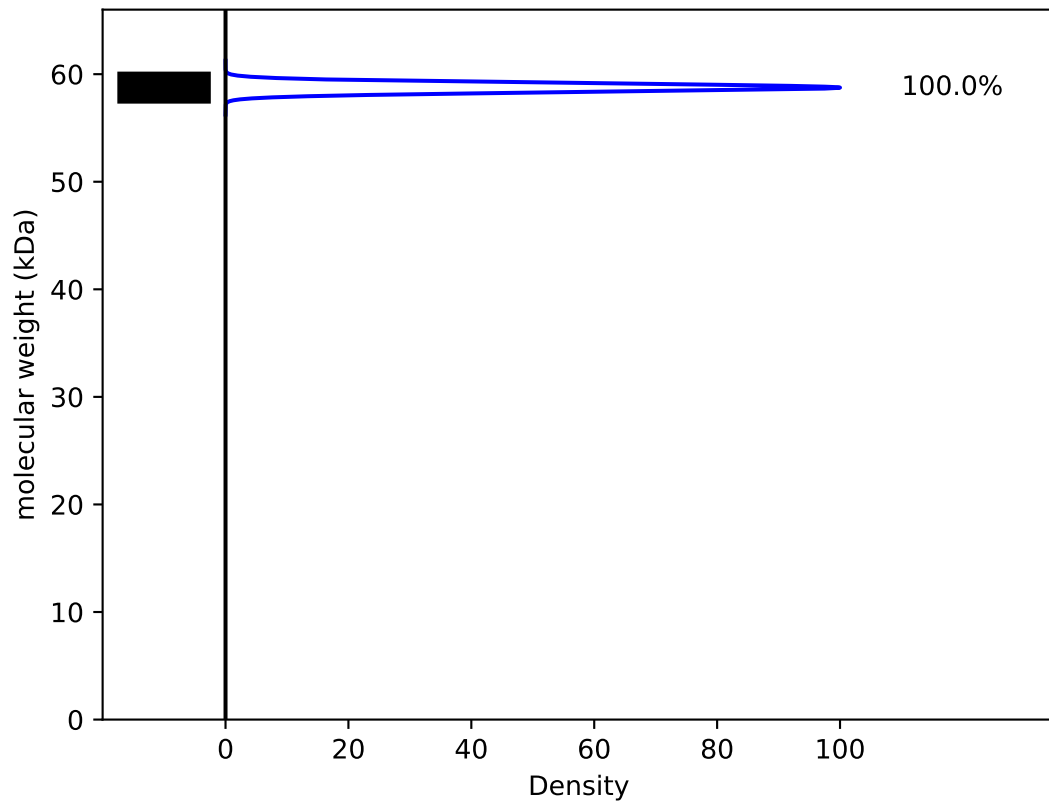



# O60551

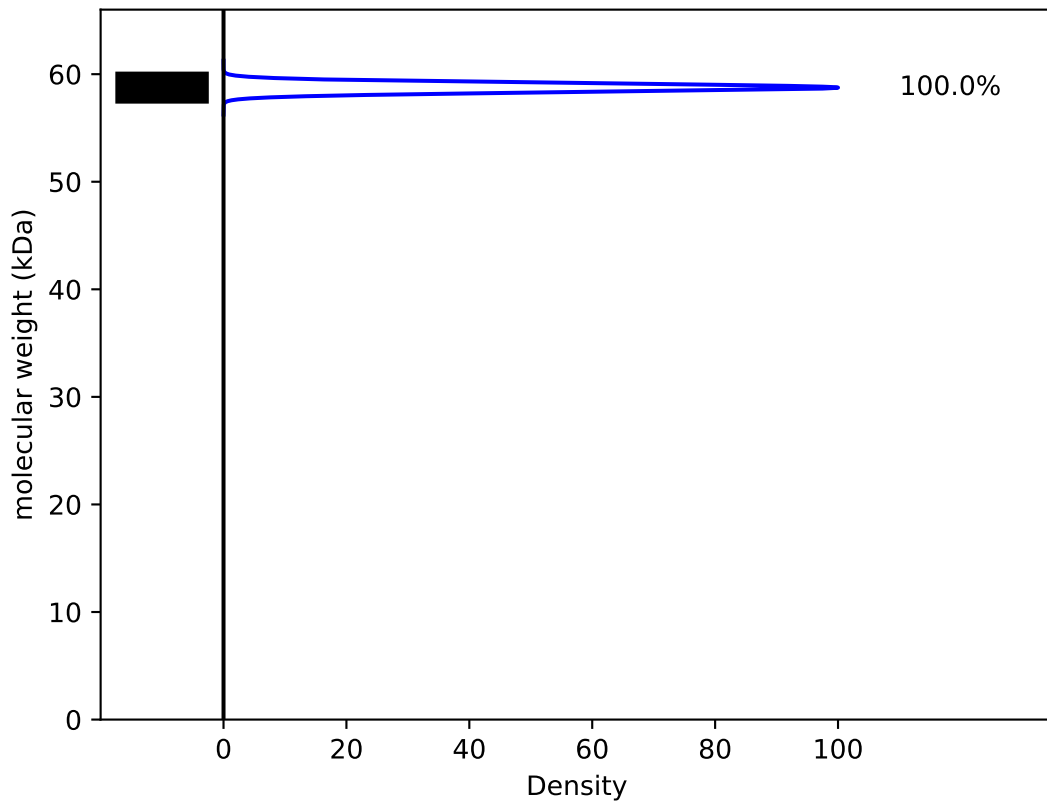

P30519



P30533



P30626



# P30740



# P31150

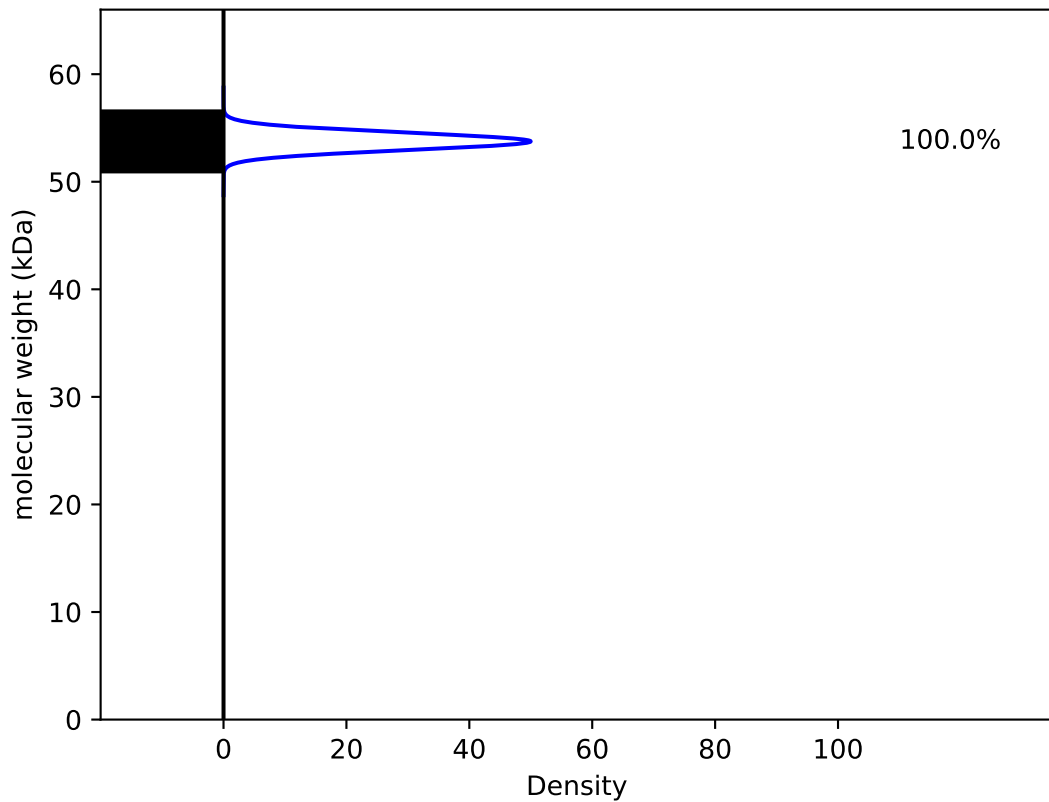

P31153

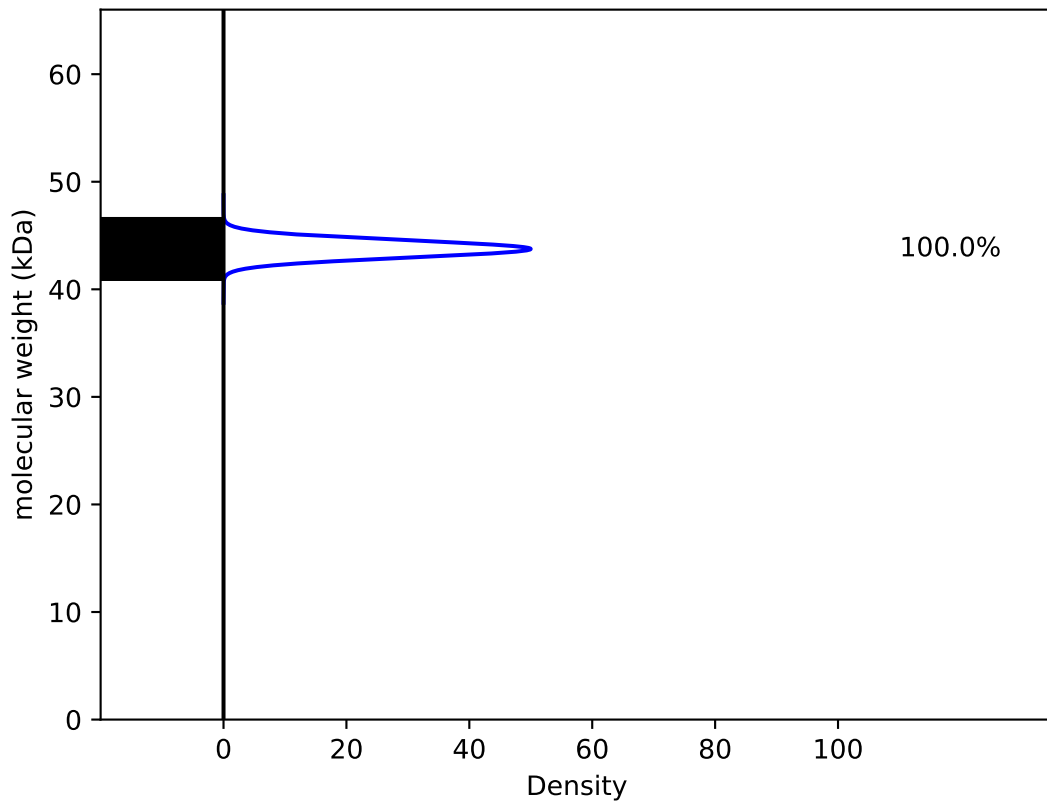

Q00266





# P31350

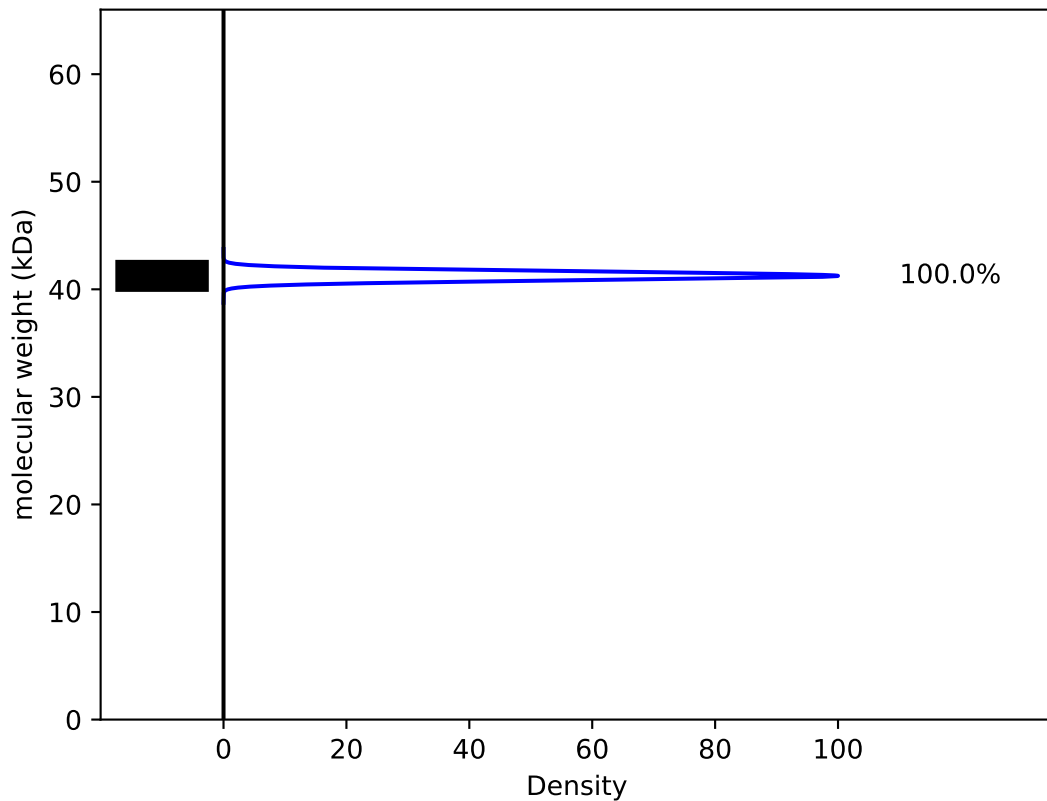

P31483



# P31689



# P31942



# P31943



# P31946



# P31947



P32119





P32321



P32322

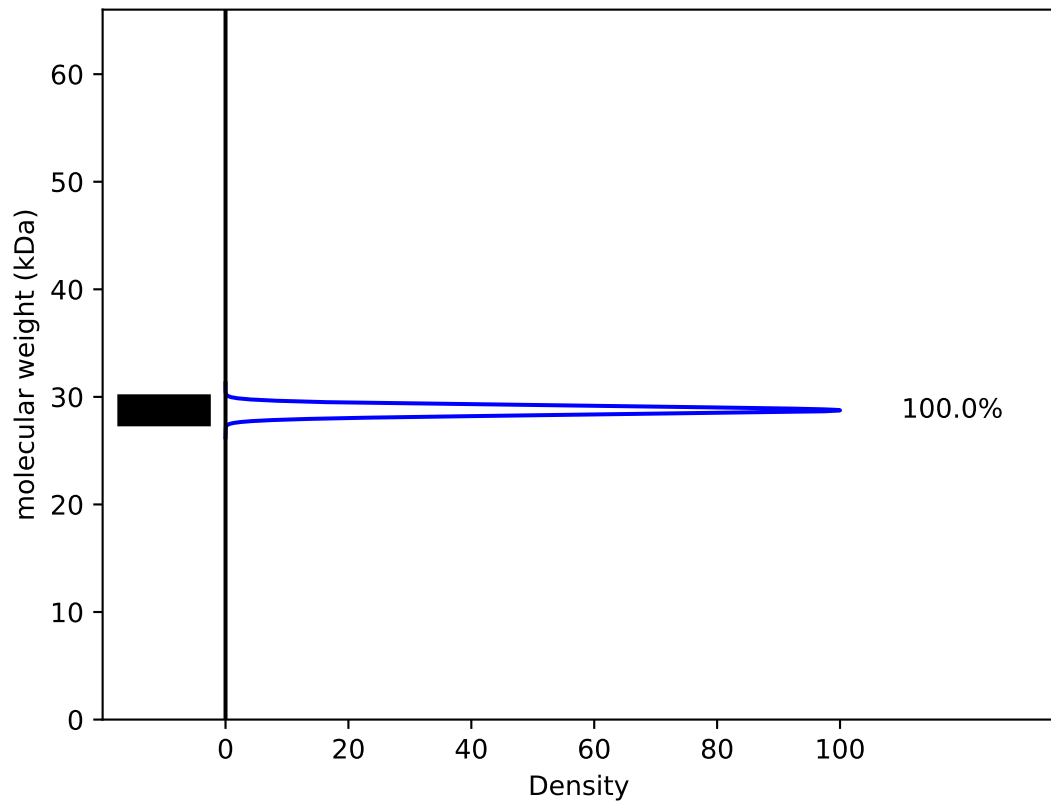

# P32969



# P33240

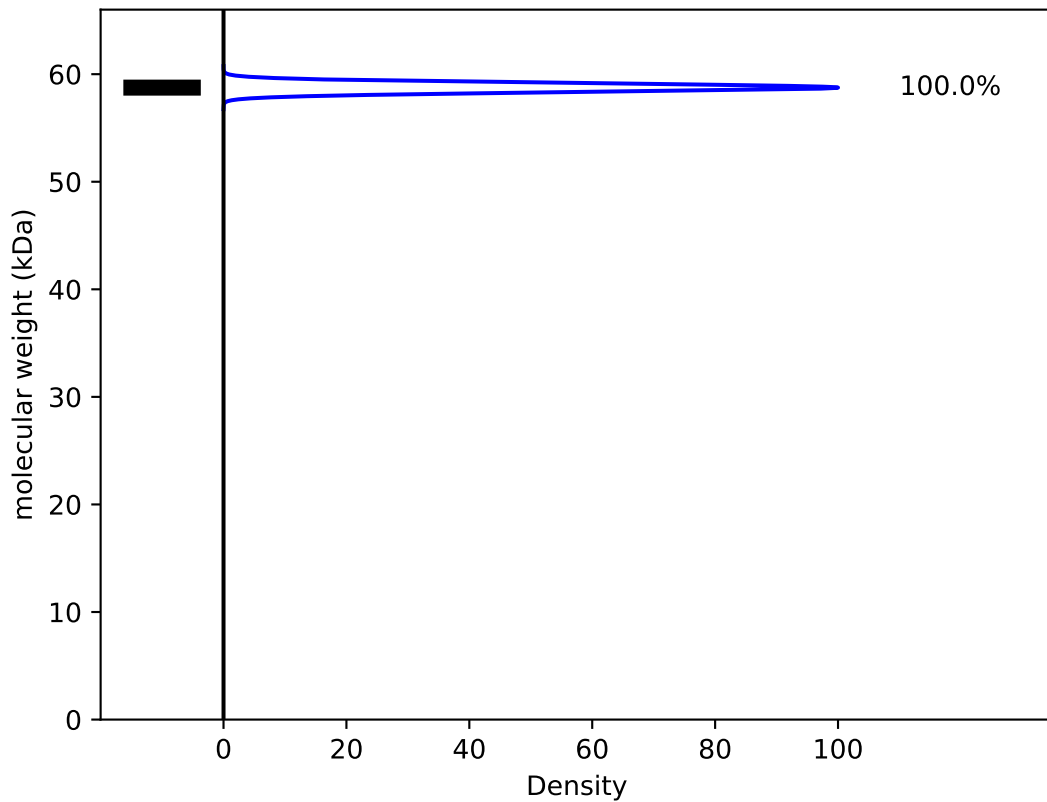

P34896



# P35080



# P35219

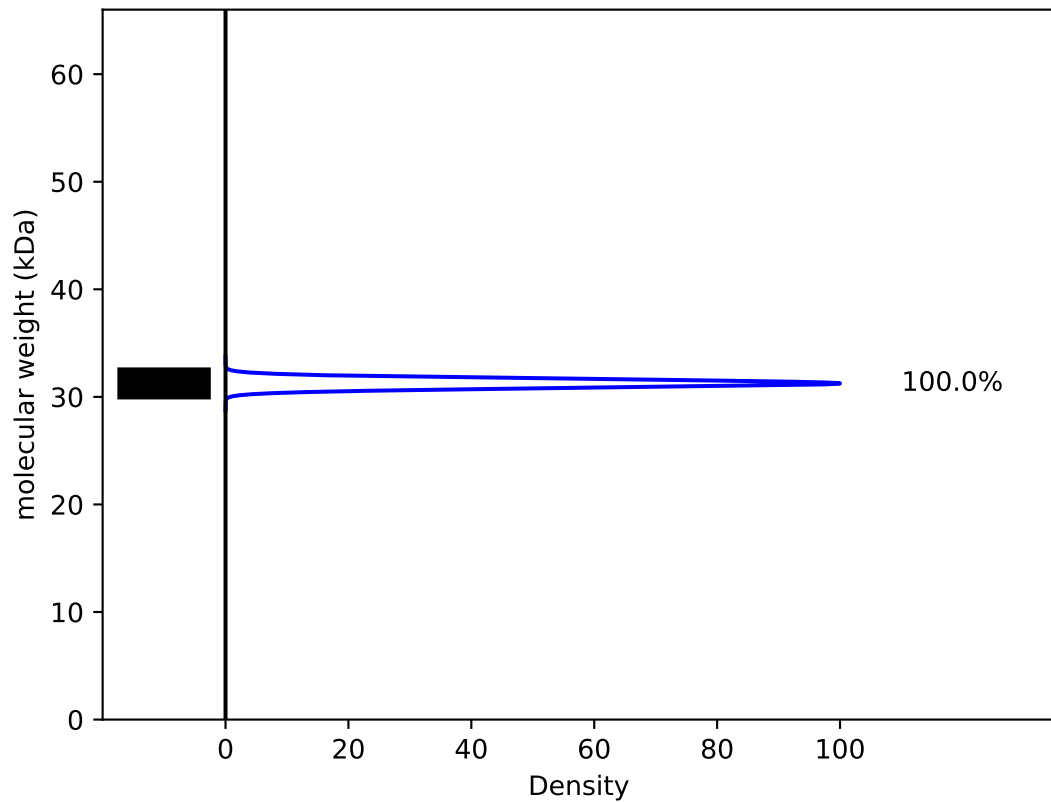

P35232





P35237



P35244



P35249



# P35250



P35268



P35269

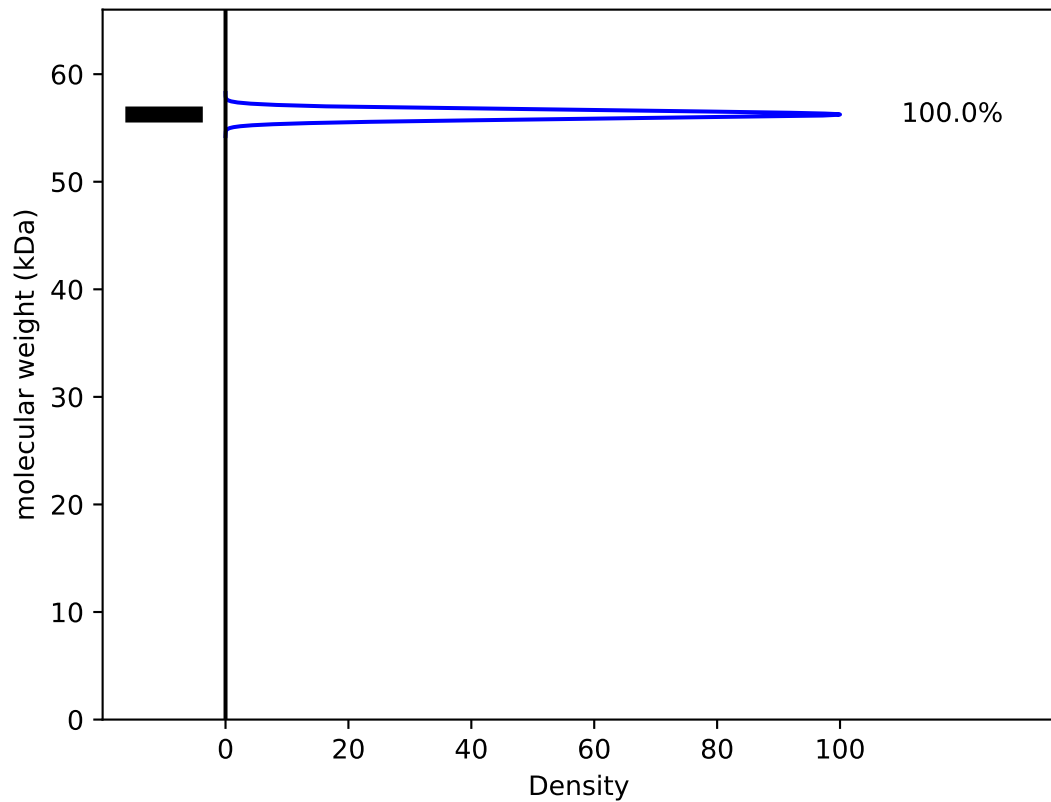

P35270



# P35613

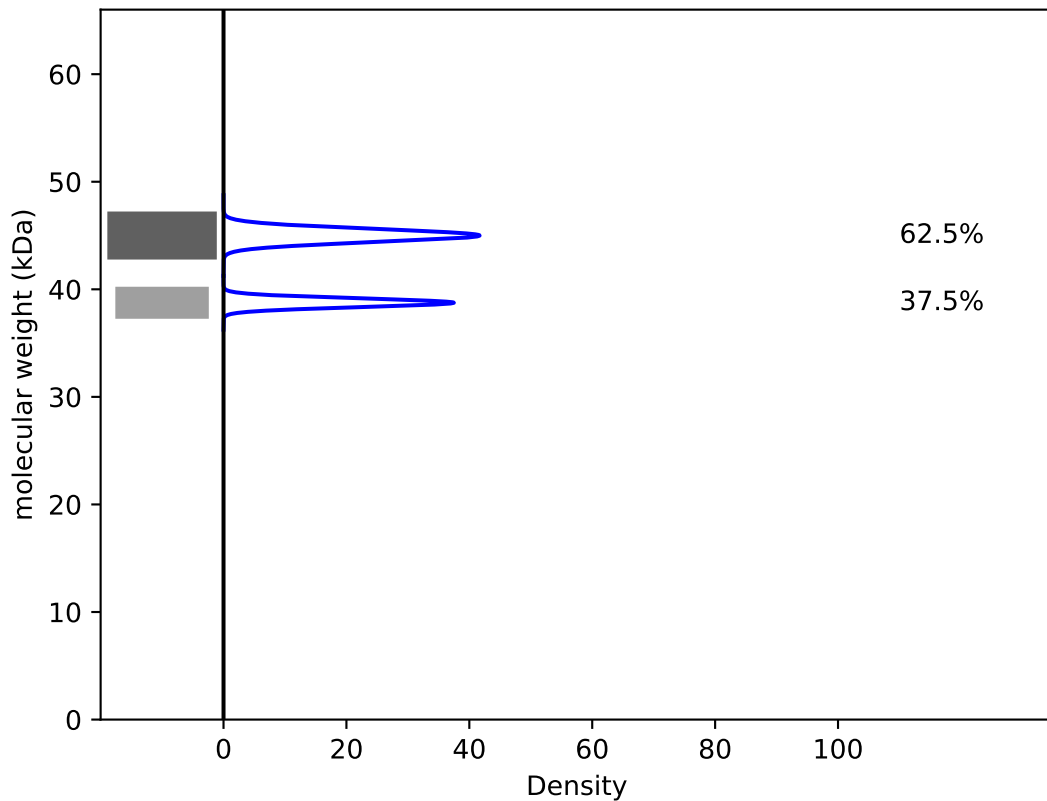



P35659

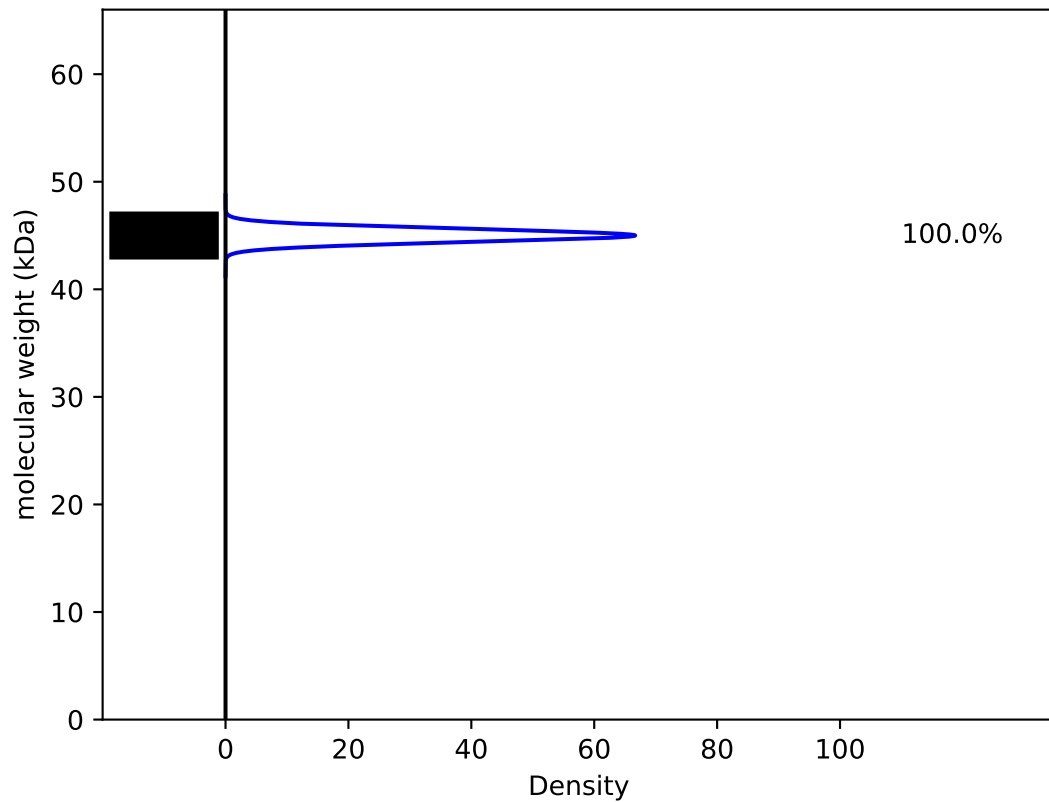

# P35998

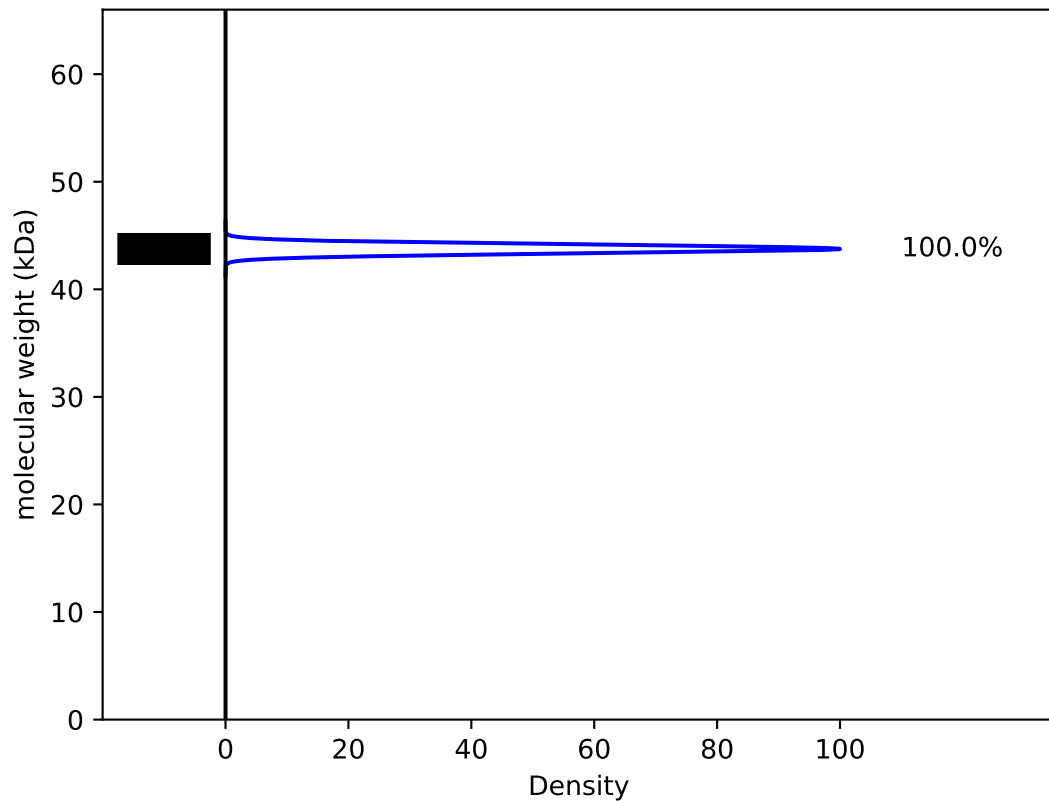

P36404



P36405



# P36507



P36542



P36543



# Q96A05





P36578



P36871



P36873



P36957



P37108



P37802

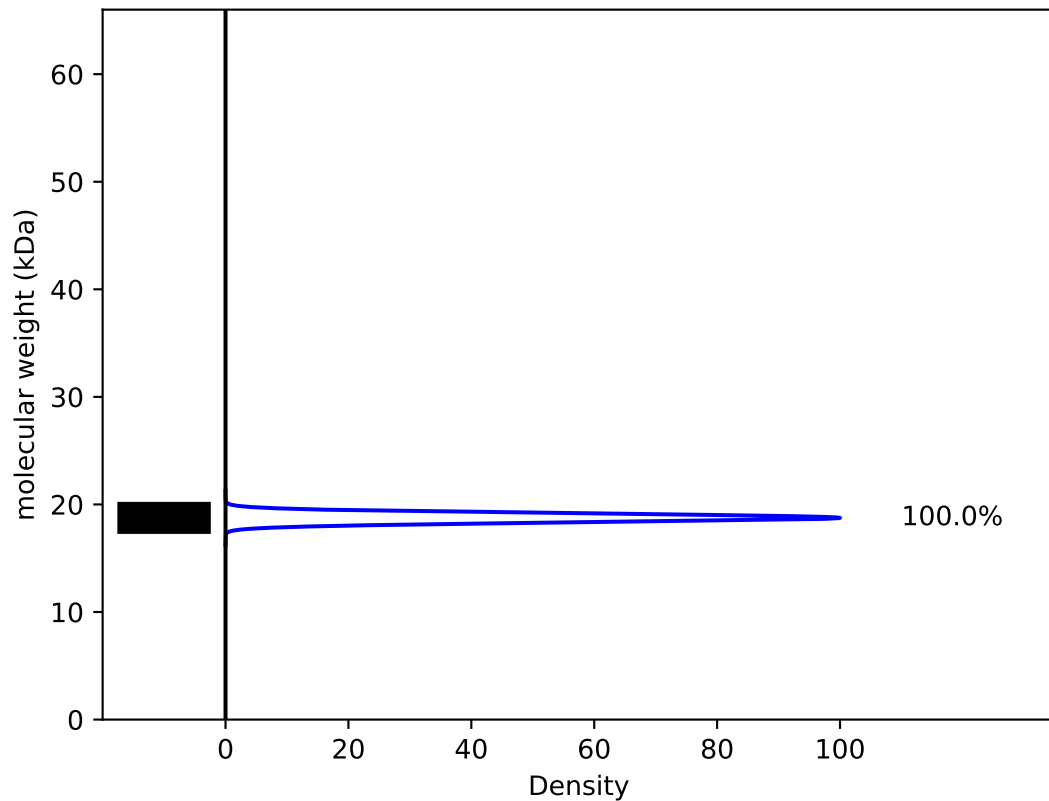

# Q9UI15



P37837





# P37840



# P38117



# P38159



# Q96E39



O75526



# P38919



# P39019



P39023





Q92901



P39687



O43423



P39748



P40227

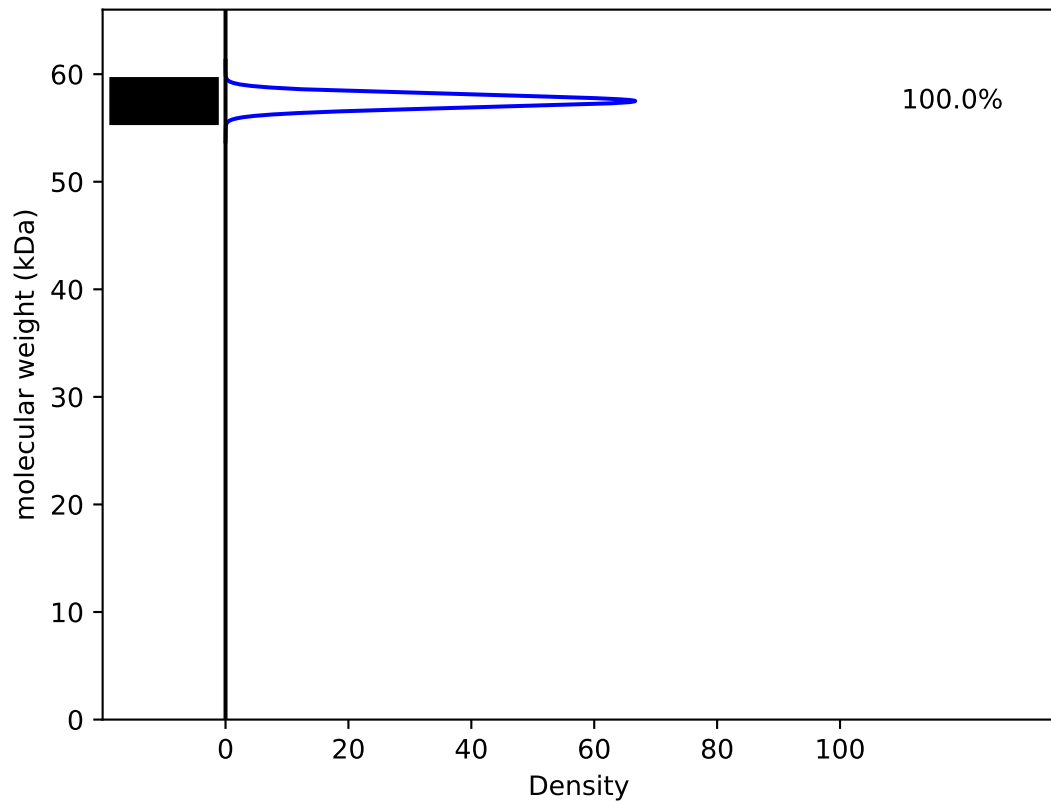

# P40429



# P40616



# P40925





P40926



P40937



P40938



P41091



# Q2VIR3



P41223



P41227



# Q9BSU3





# Q6NXS1



P41236



# P41240



# P41567



# P42025



P42677

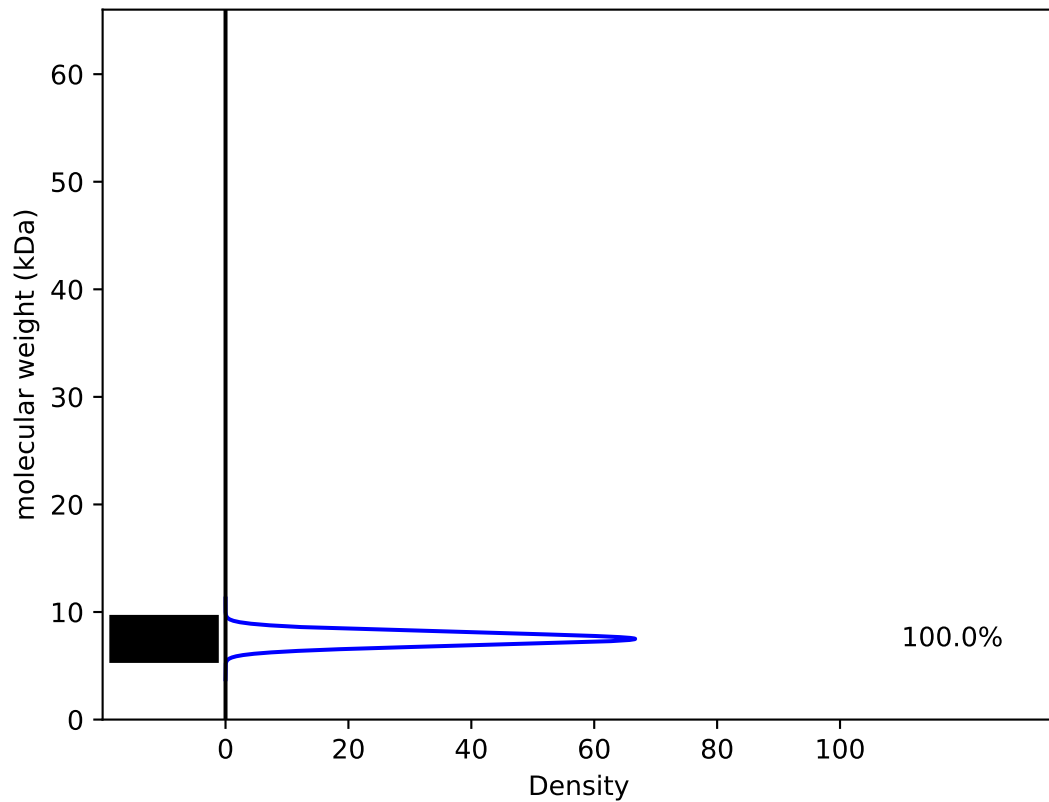

P42765



# P42766

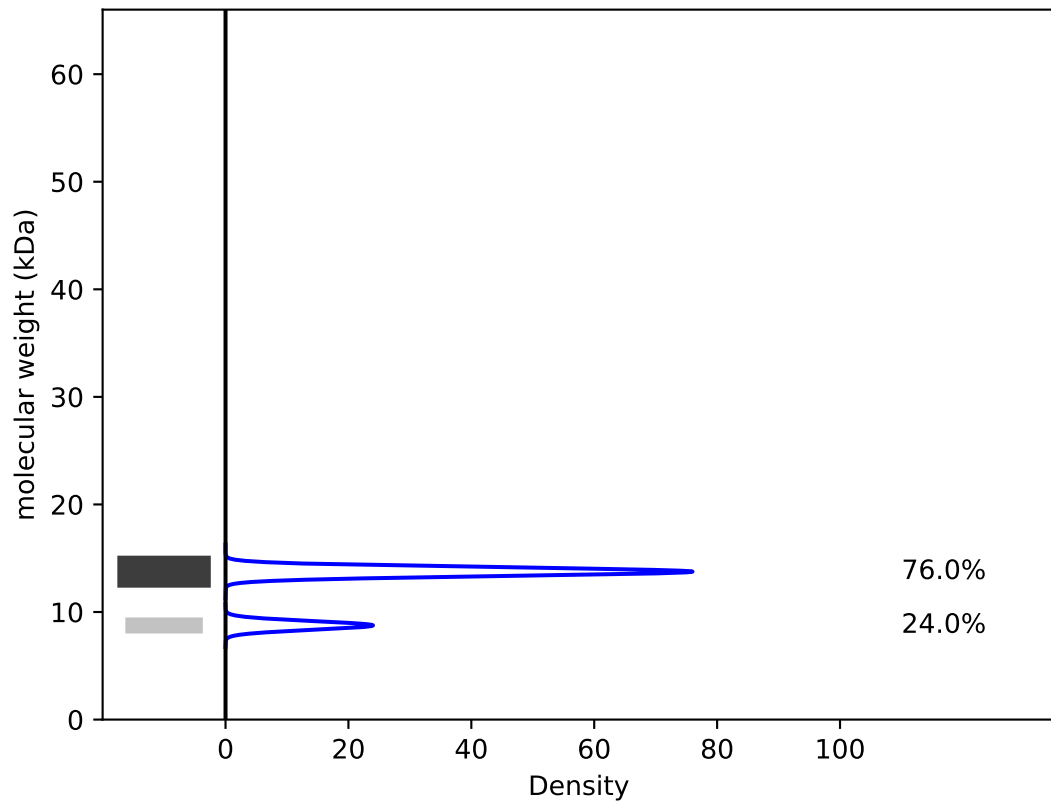



P42771



P42772



P43034



# P43307

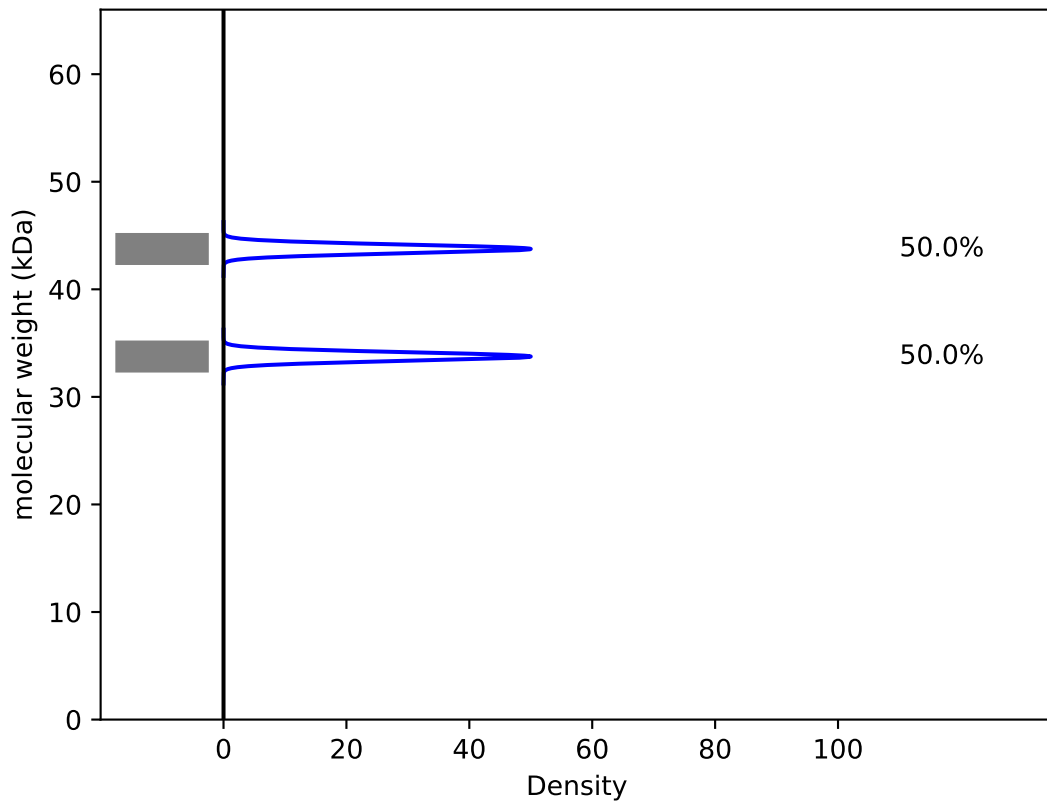

P43487



# P43490



P43686



# P45877





# P45880



# P46108



# P46109



P46734



P52564



# P46736

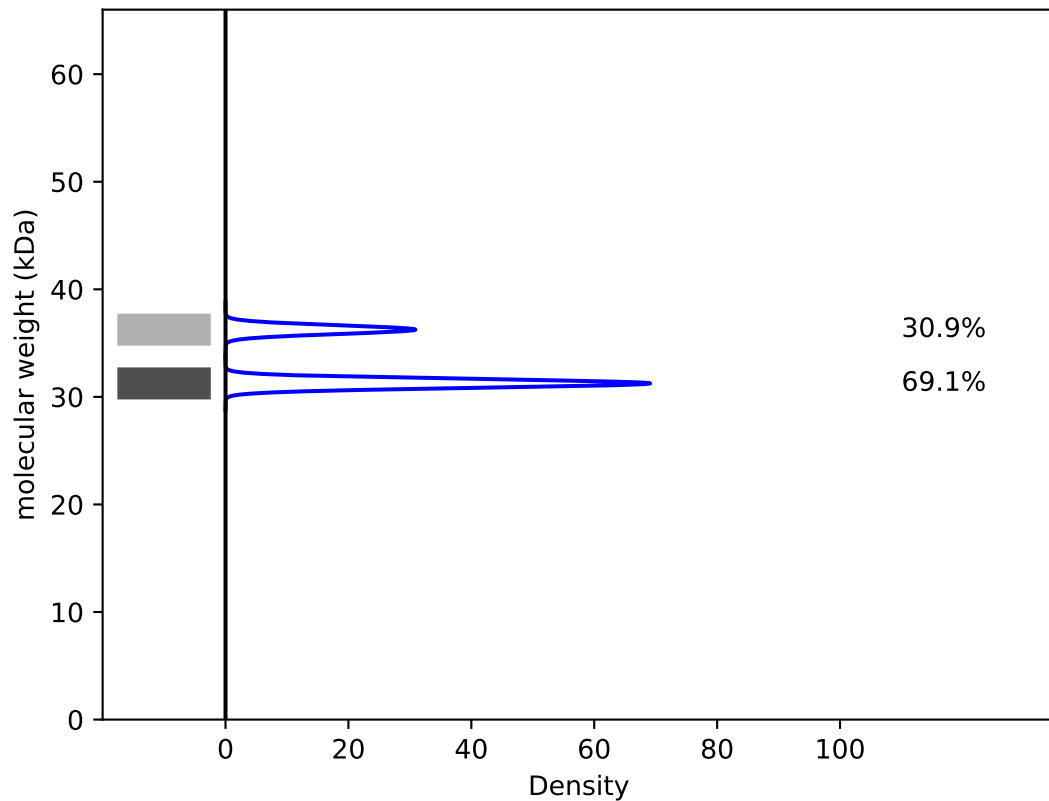

P46776



P46777





# P46778

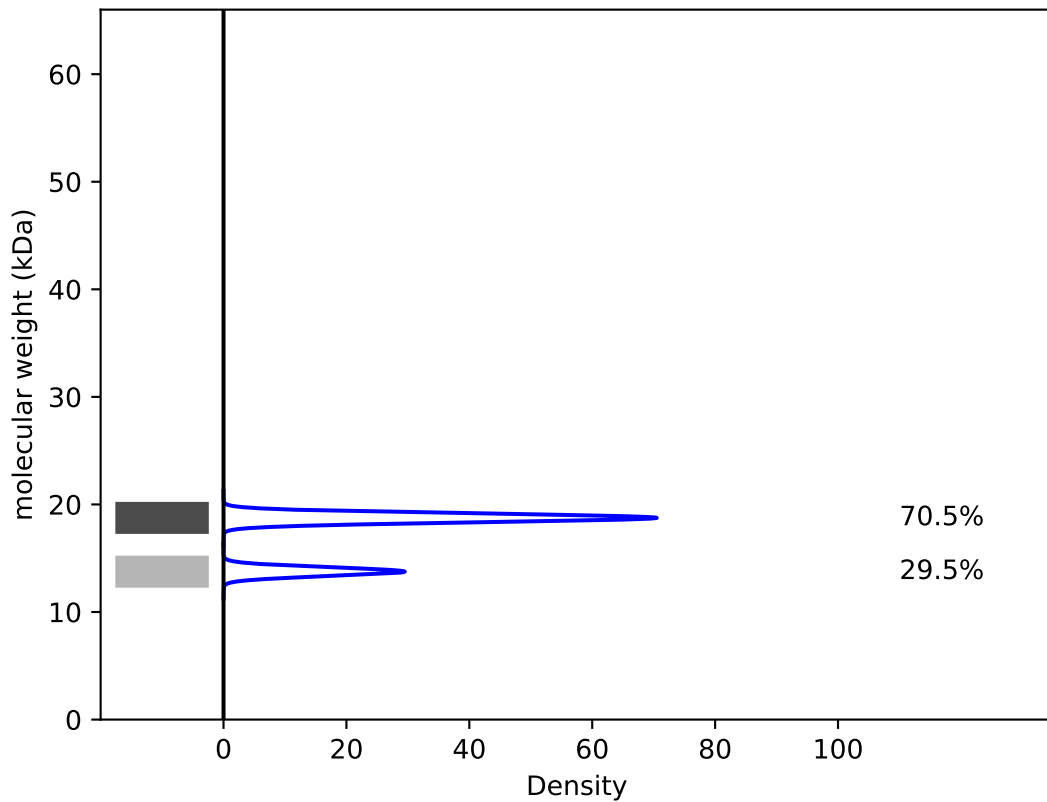

# P46779



P46781



P46782



P46926



# Q8TDQ7

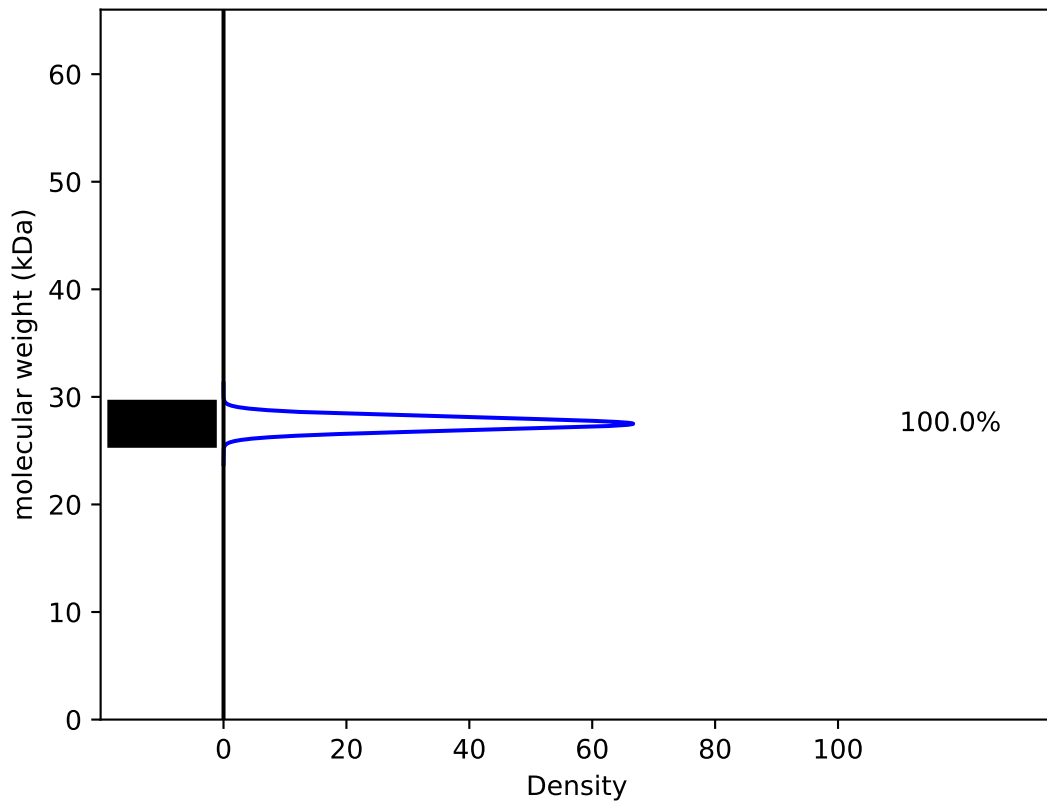

P47755



P47756





# P47914

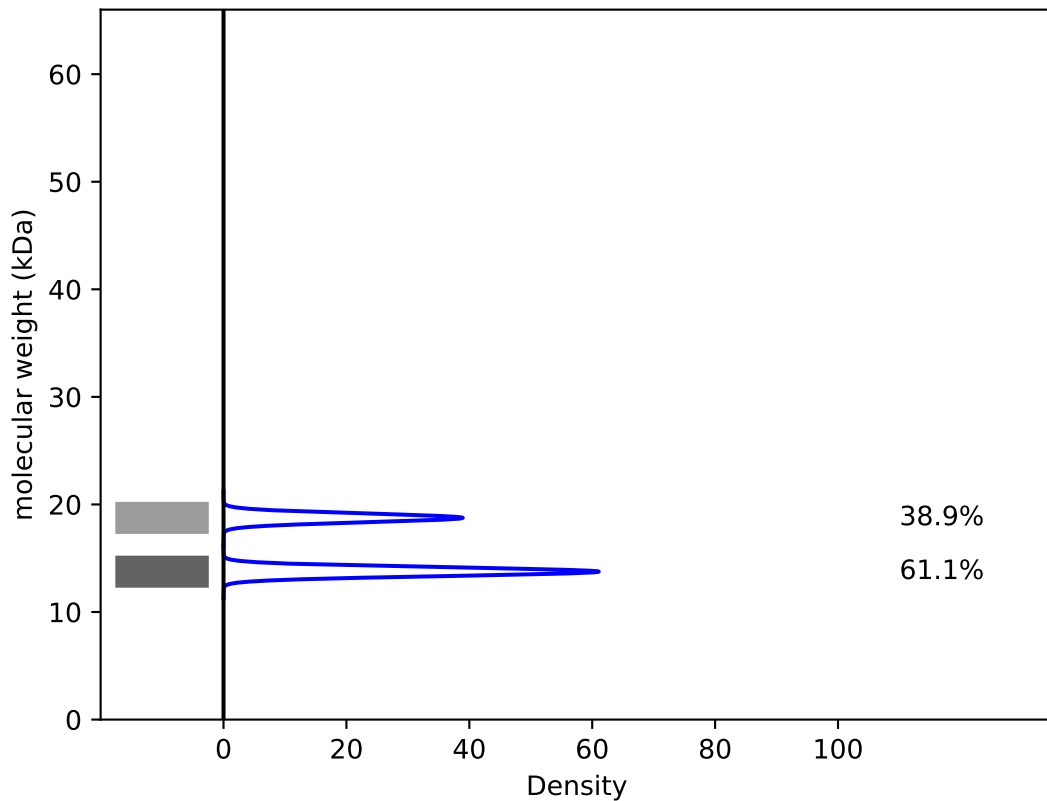

P48047



P48444



P48507



P48643



P48723



P48739



P49005





P49207



# P49366



# P49368

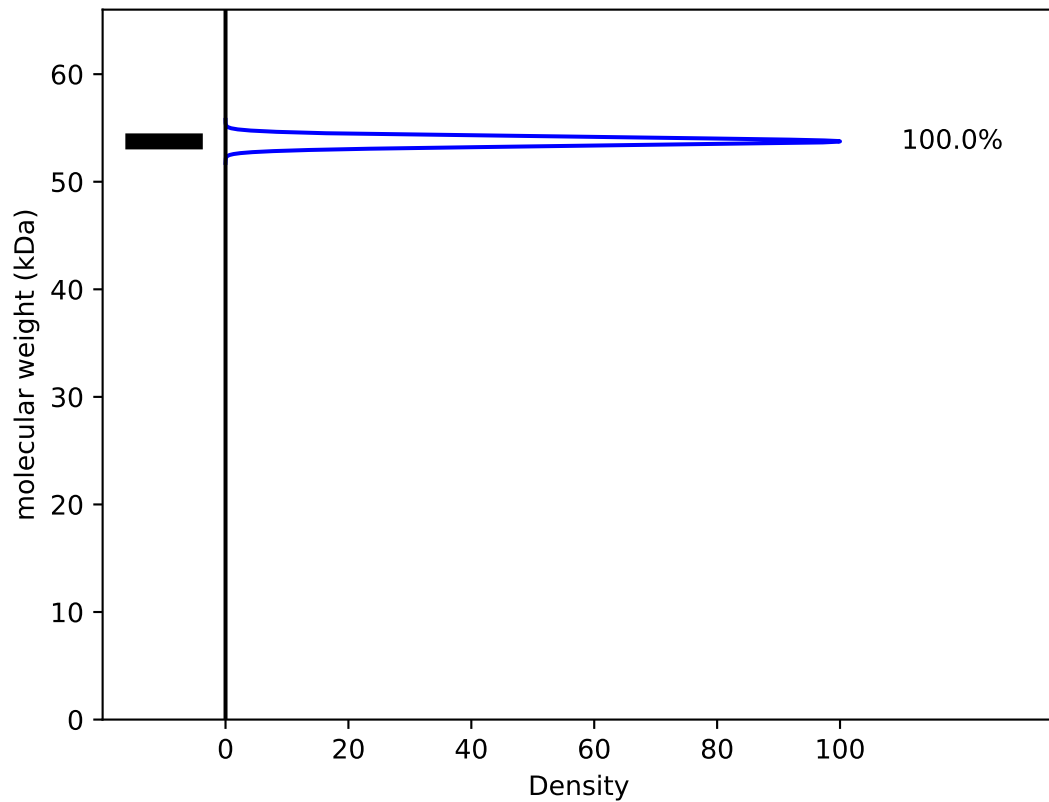

P49458

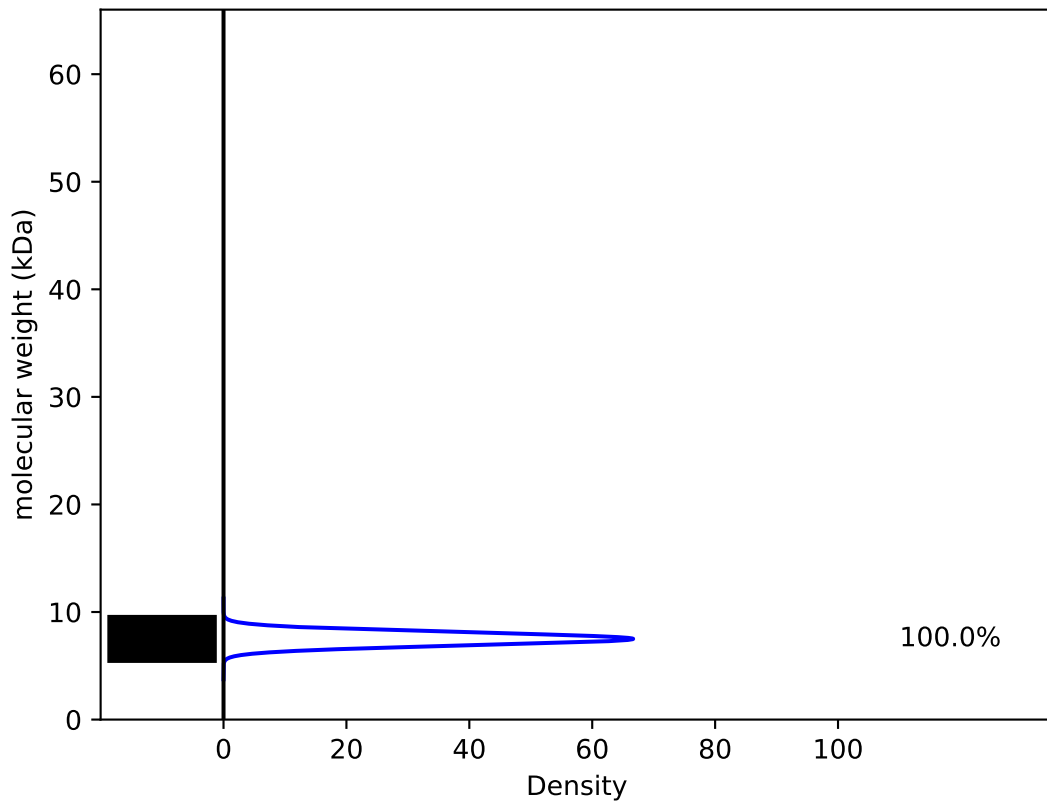

P49593



P49642



# P49720



P49721





# P49770



P49773



P49821



P49840



# P49841



# P49903



P50336



# P50395

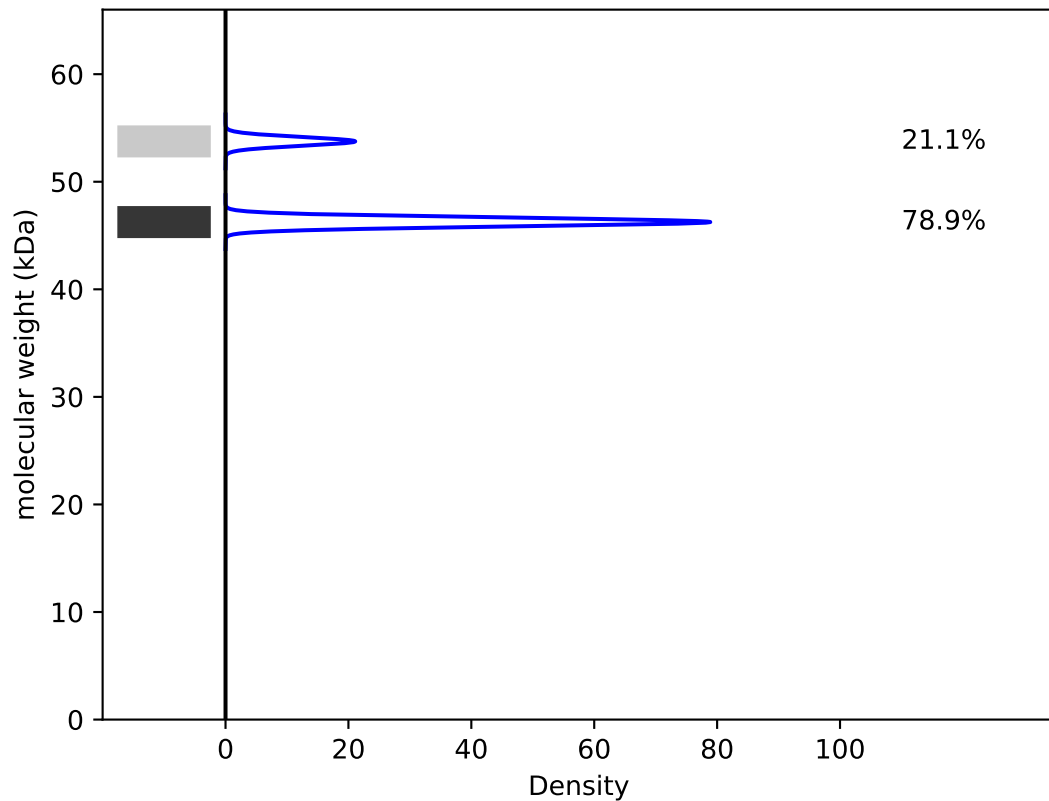



P50402



# P50453



# P50454



# P50502



# P50552



# P50583



# P50613



P50914





# P50991



# P50995



# P51148



# P51149



# P51151



# Q9NP90



# P51153



P20337





# Q96E17



# P51452

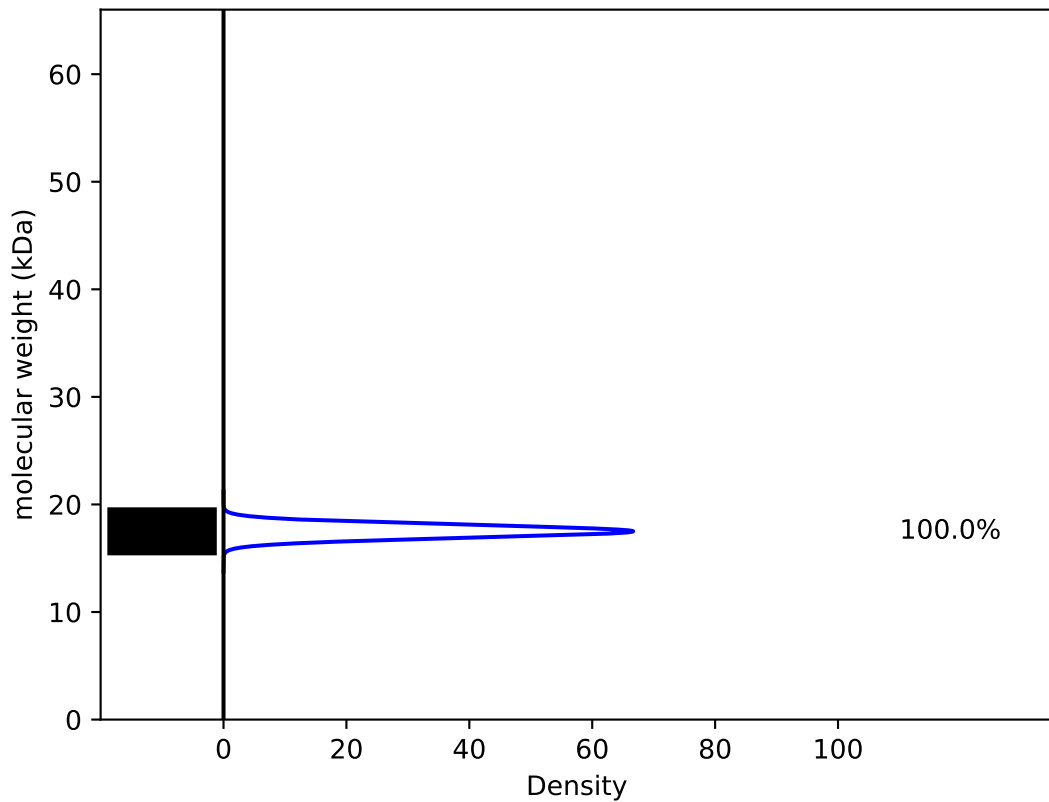

# P51570



# P51572



# P51580



P48448

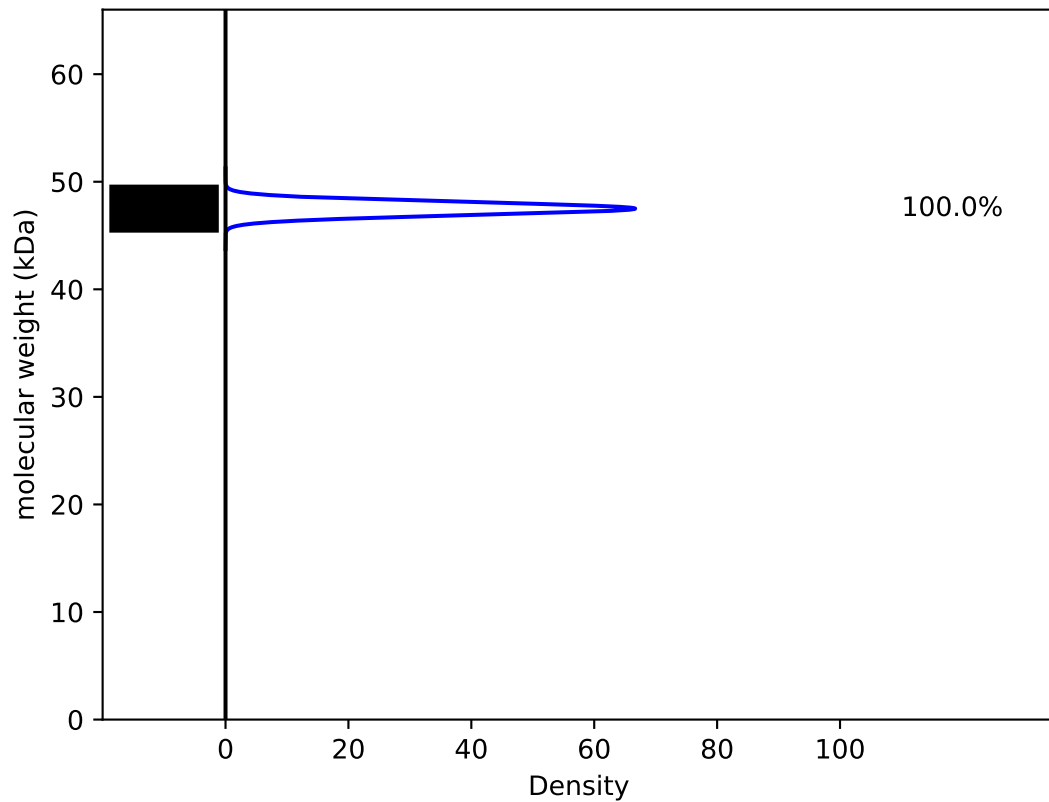

P30838



P43353





# P51665



# P51809



# P51858

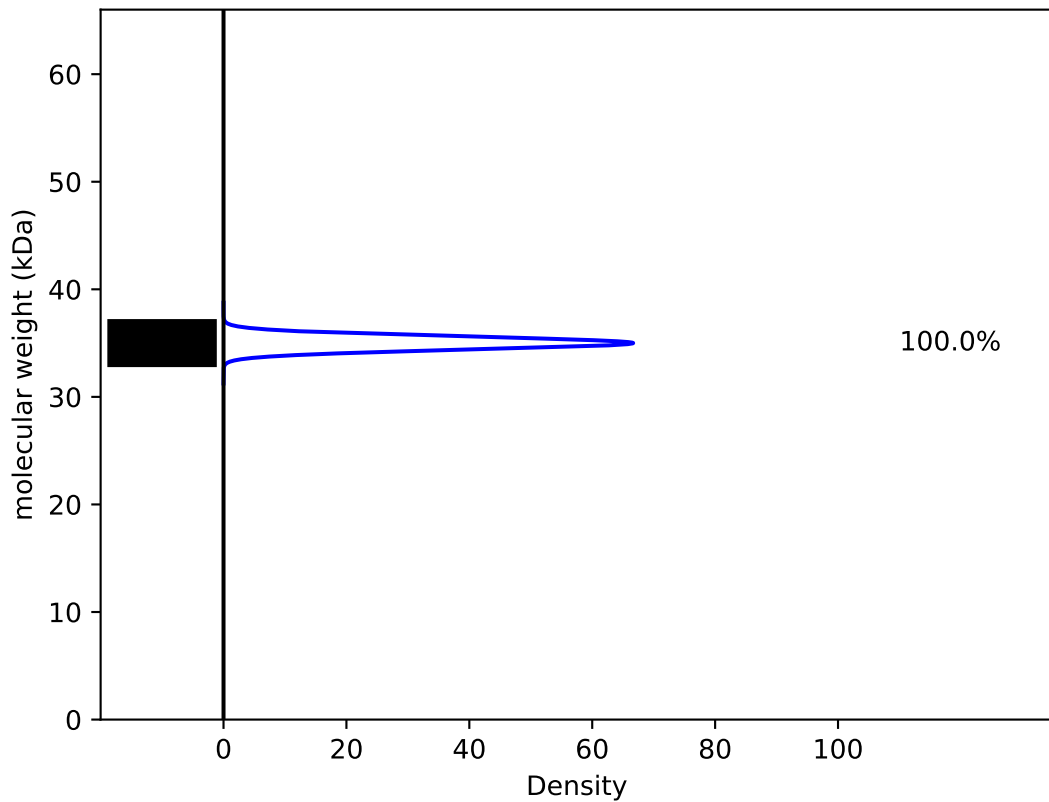

# P51948



# P51965



# P51970



# P51991

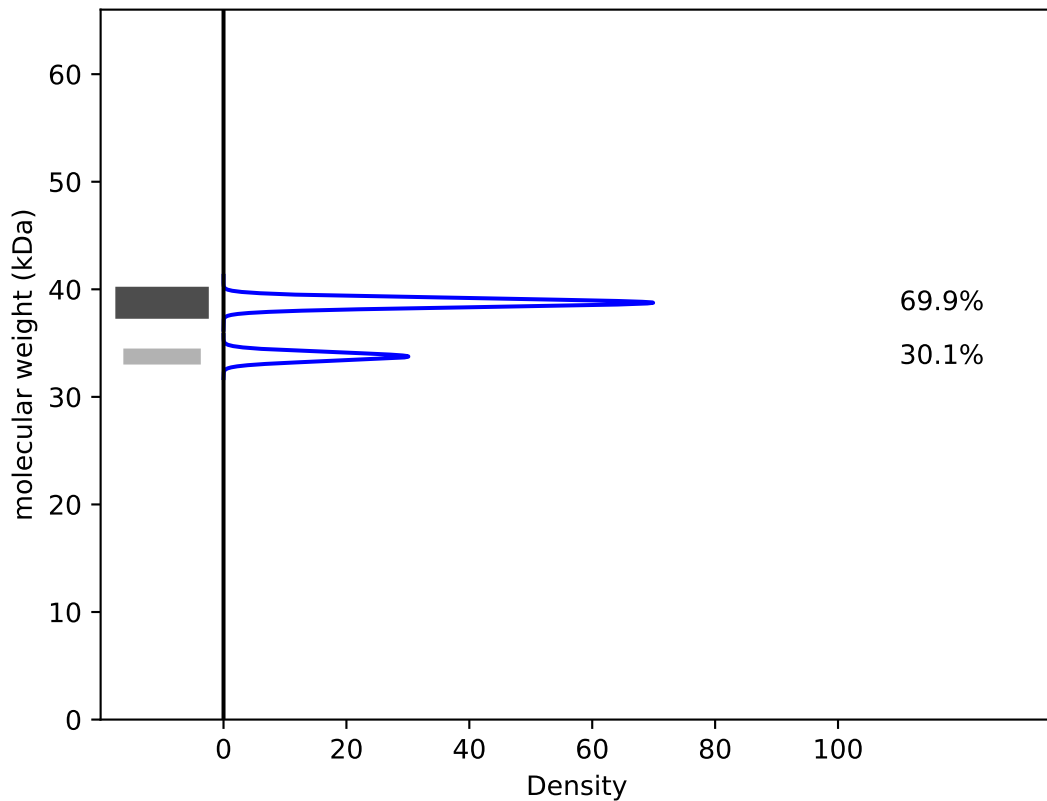

# P52298





P52434



# P52565

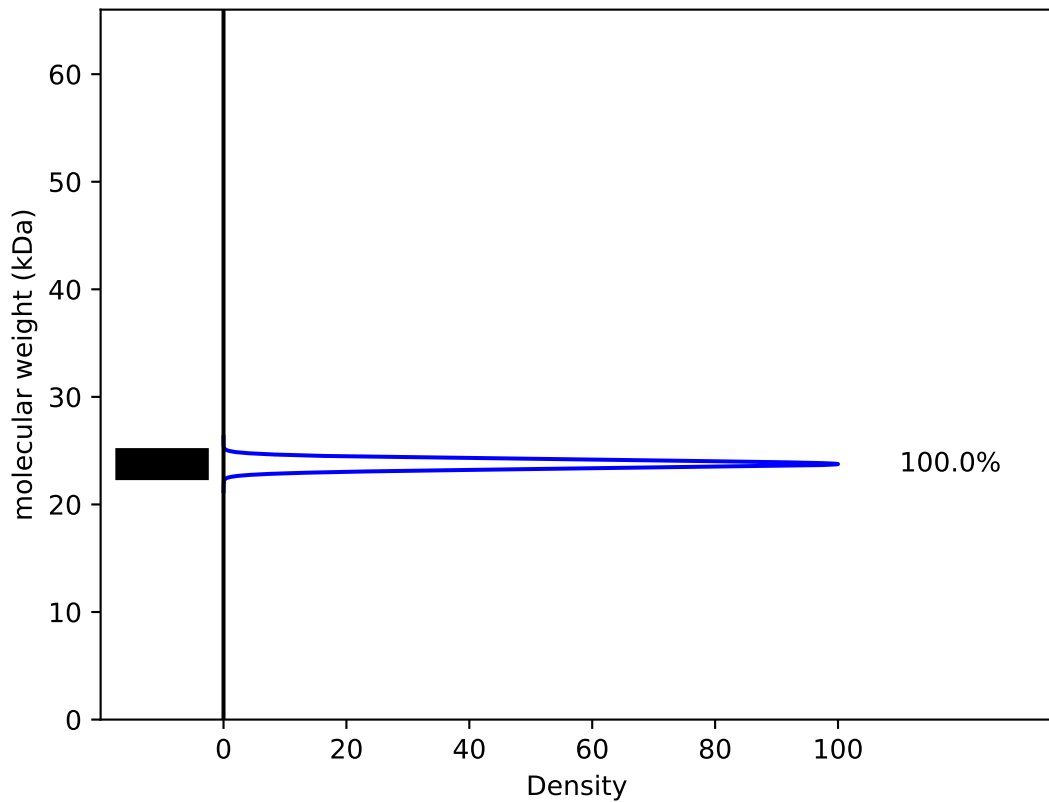

P52597



P52758



# P52815



P52907



P53004



P53041





# P53365



# P53367



# P53582



P53701



# P53990



# P53999



# P54577



# P54578





# P54619

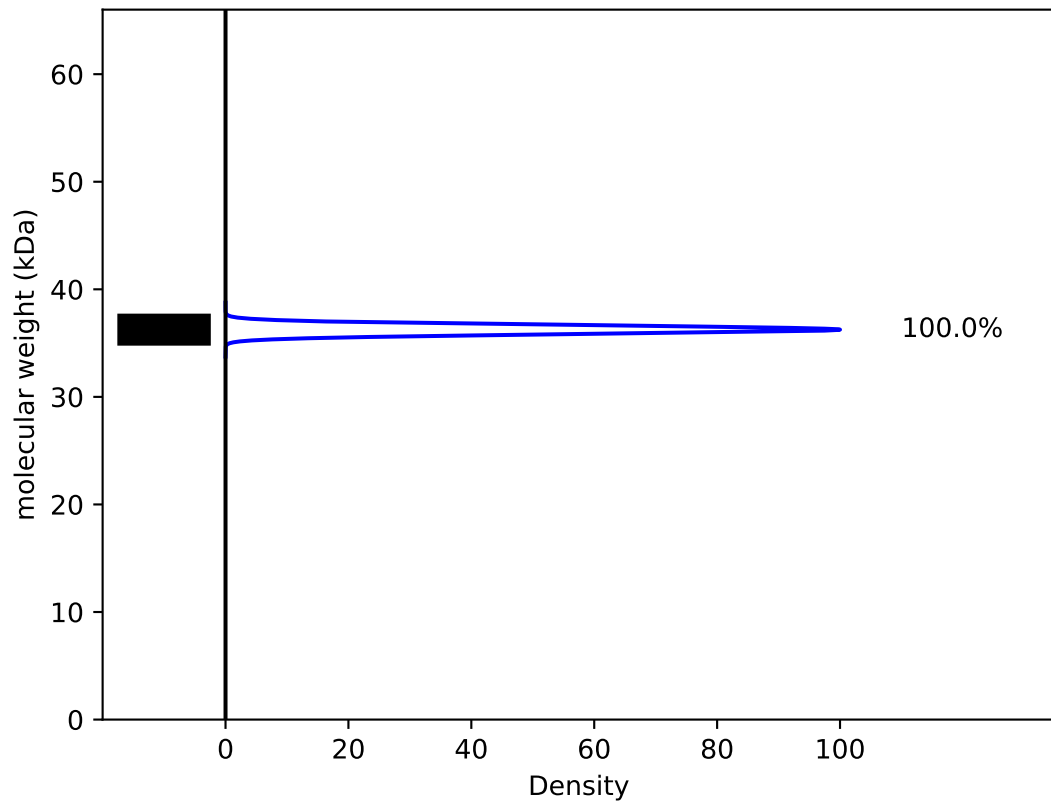

# P54709

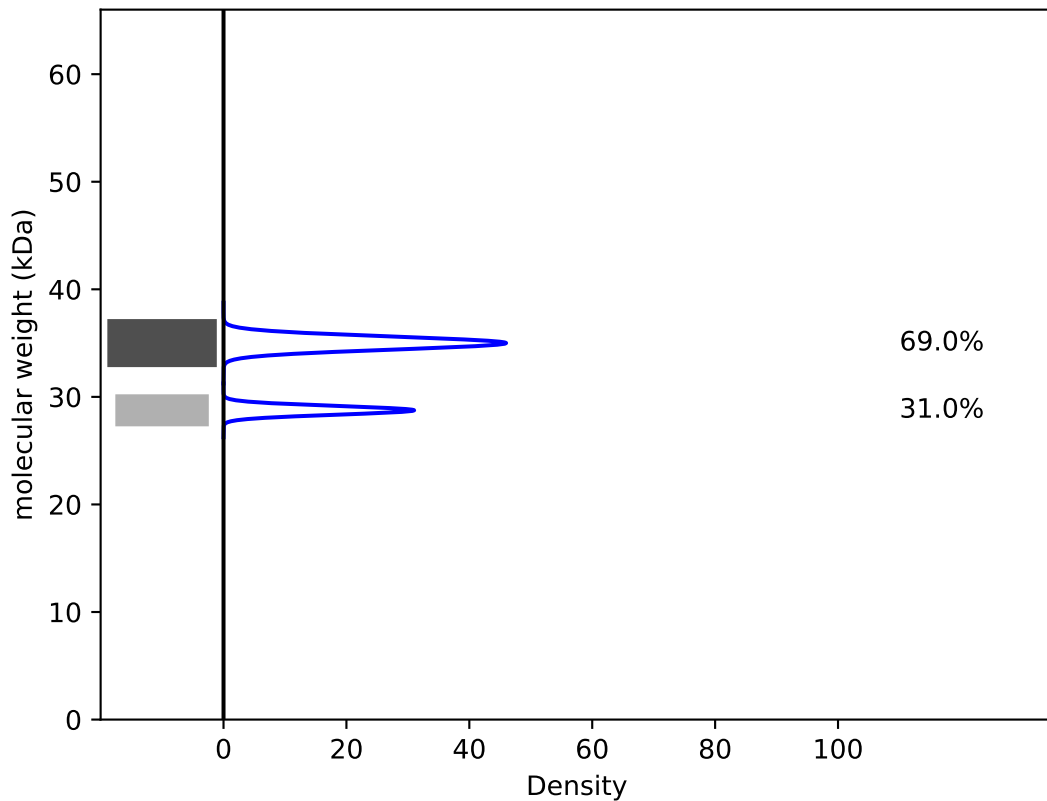

P54819



# P54920



# Q9H115



# P55010



P55036



P55039

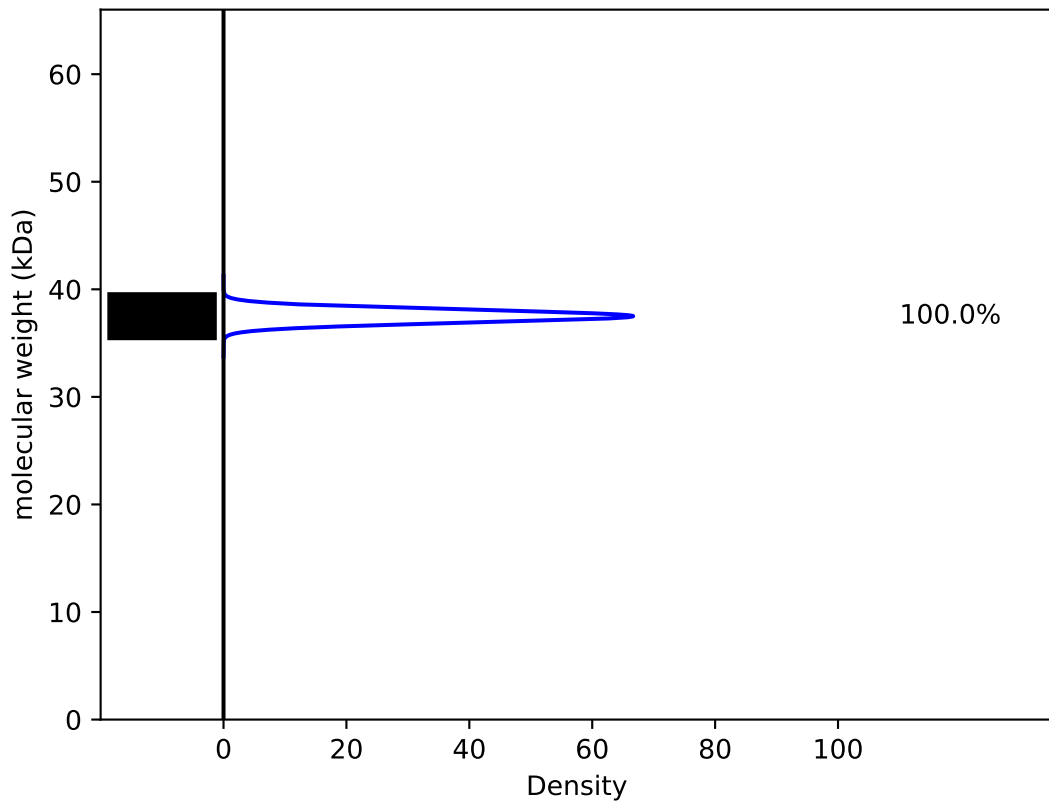



# P55145

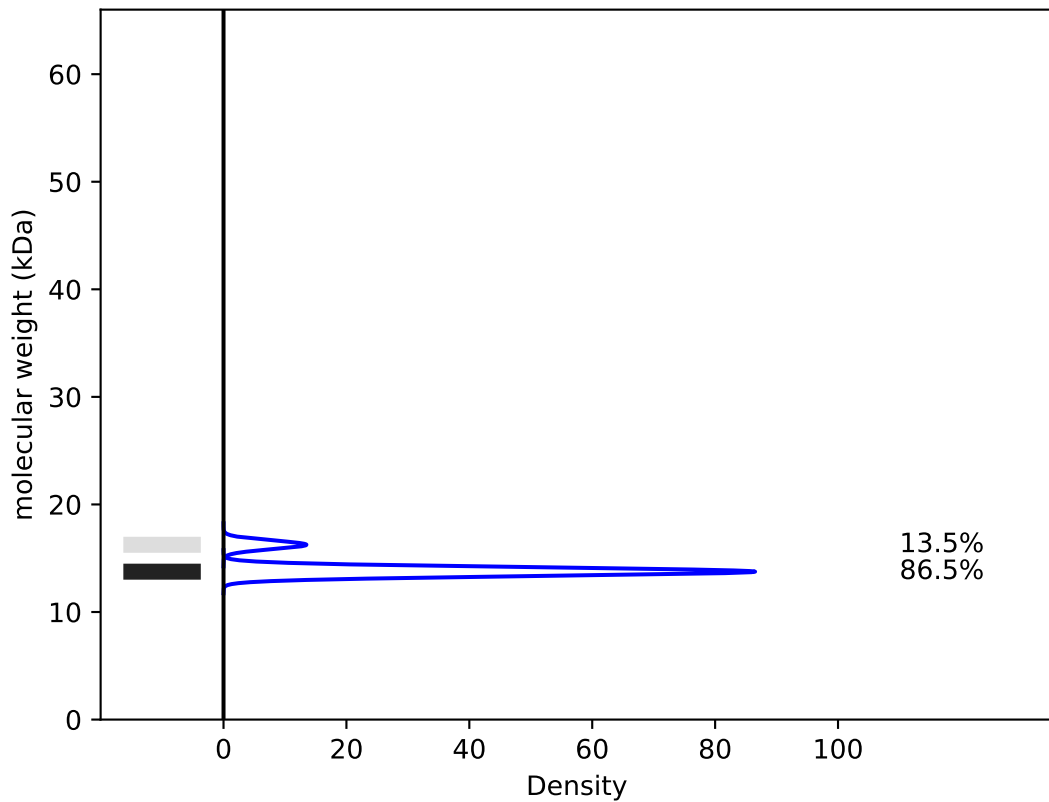

# P55209

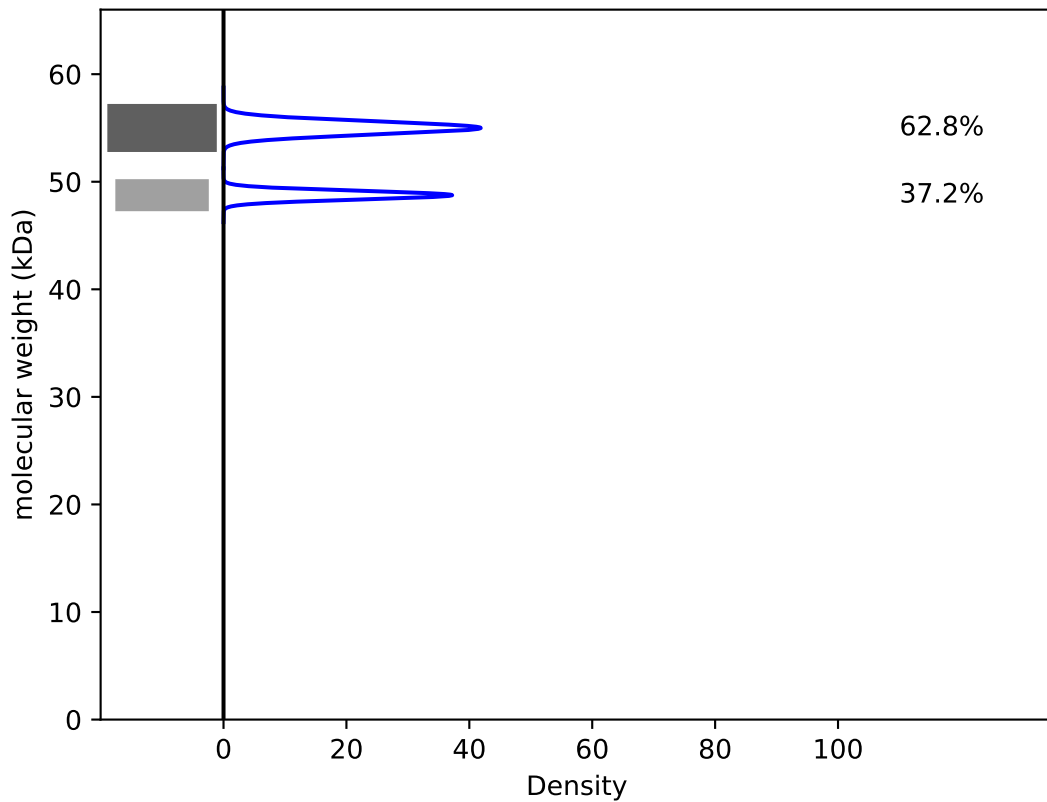

# P55210

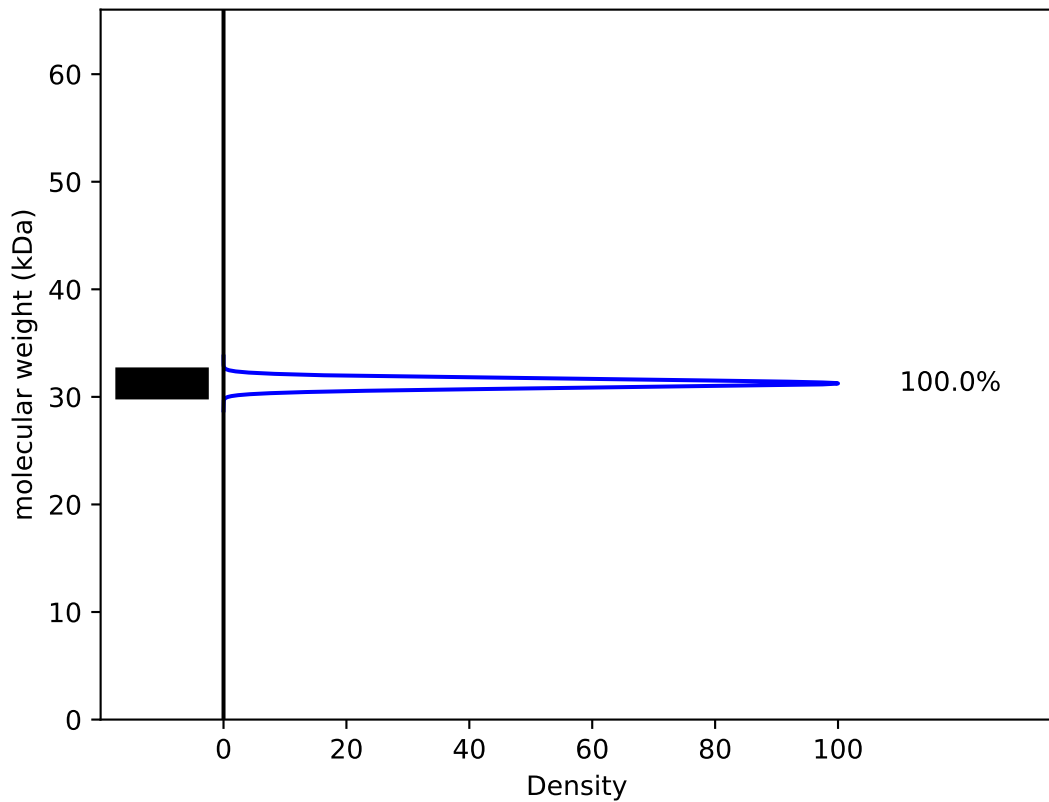

# P55212



P55263



P55735



# P55769

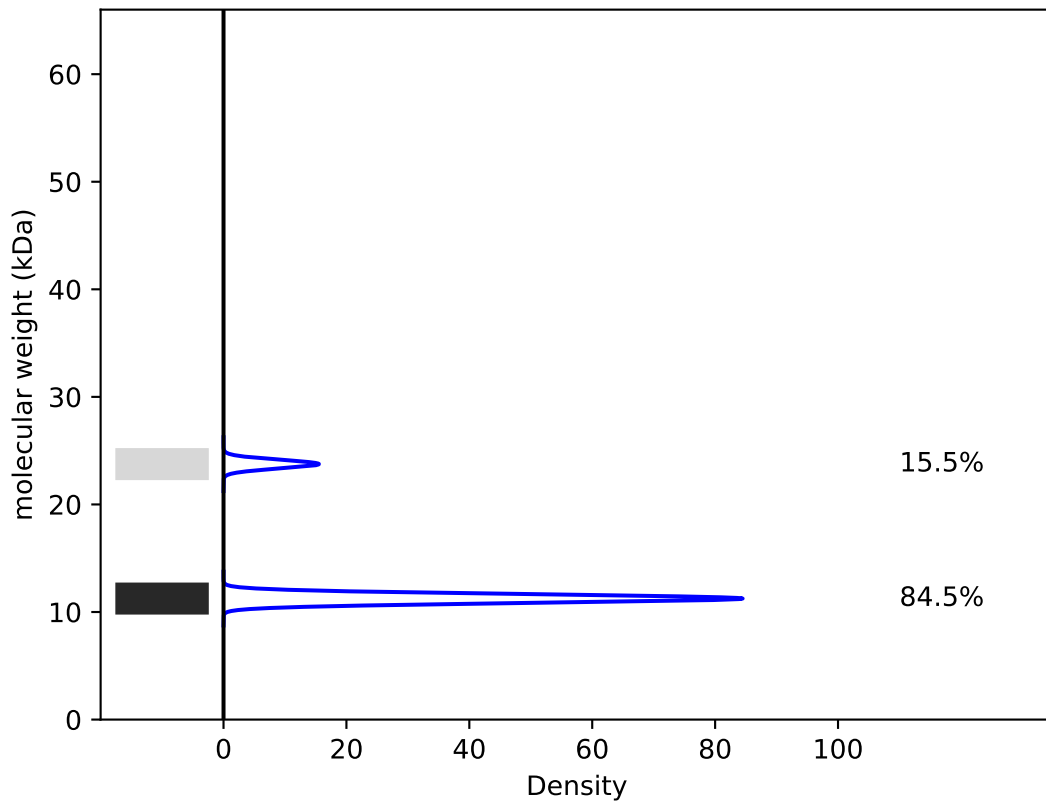

# P55795





# P55809



# P55957



# P56134



P56377



# P56537



# P56545



# P56556



P57076





# P57081



# P57105



# P58557



Q99879



Q99877



Q93079



# Q5QNW6



# P62807





# P58876



Q99880



# P59998



# P60468

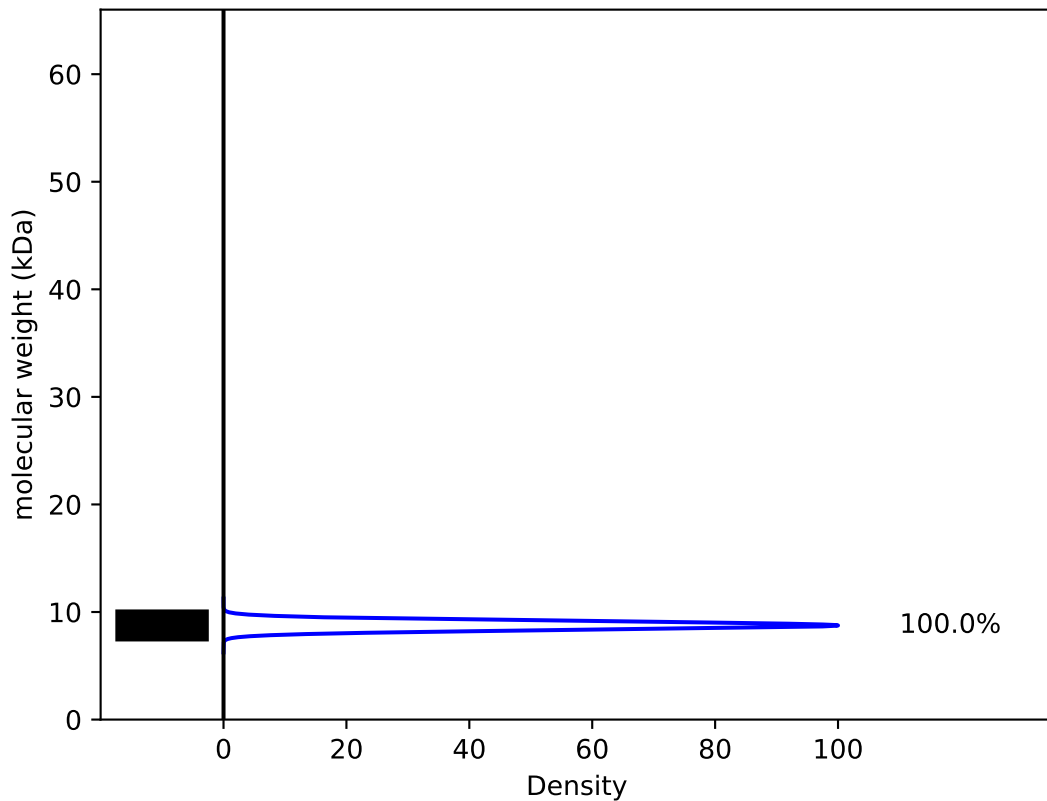

# P60510



# P60520



# P60660



# P60709





# Q9BYX7



P60842



# P60866



P60891



# P60900



# P60953



# P17081



# P60981





# P60983



O60234



# P61006



# P61009



# P61019



# P61020



# P61026

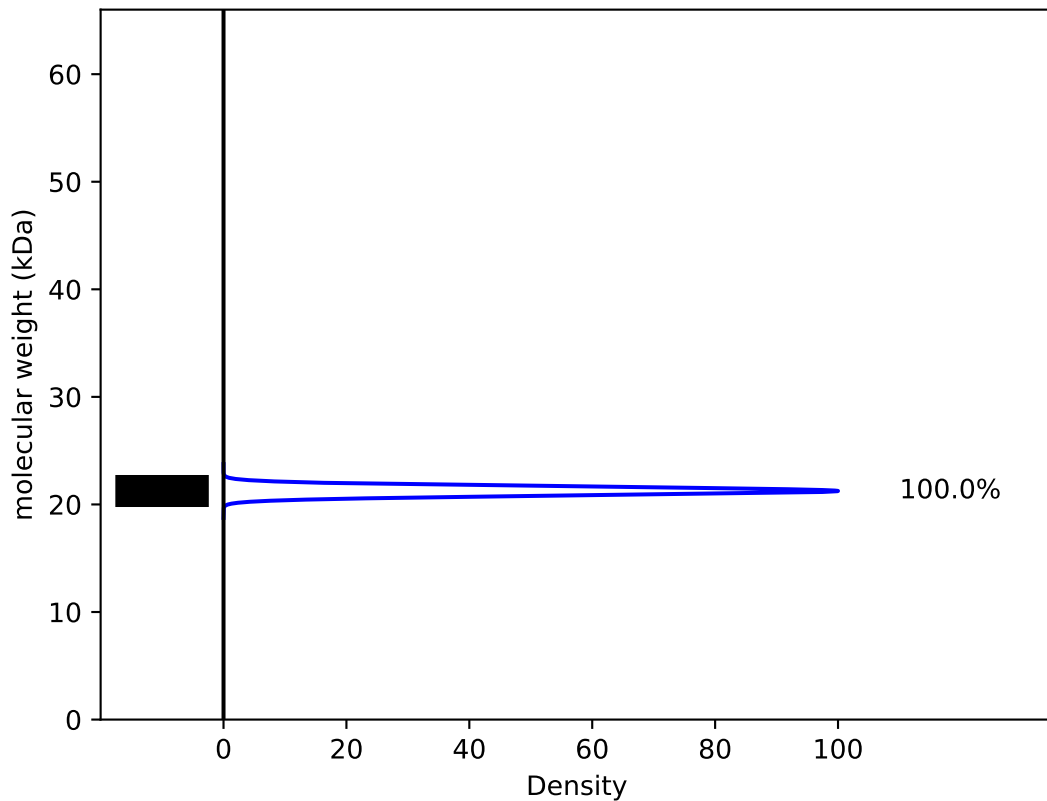

# P61081





# P61086



# P61088



# Q5JXB2



# P61106



# P61158



# Q9P1U1



# P61163



# P61224





# A6NIZ1



# P61225



# P10114



# P61247



P61254



# P61289



# P61313



# P61353





# P61513



# A6NKH3



# P61586



# P61604



# P61803

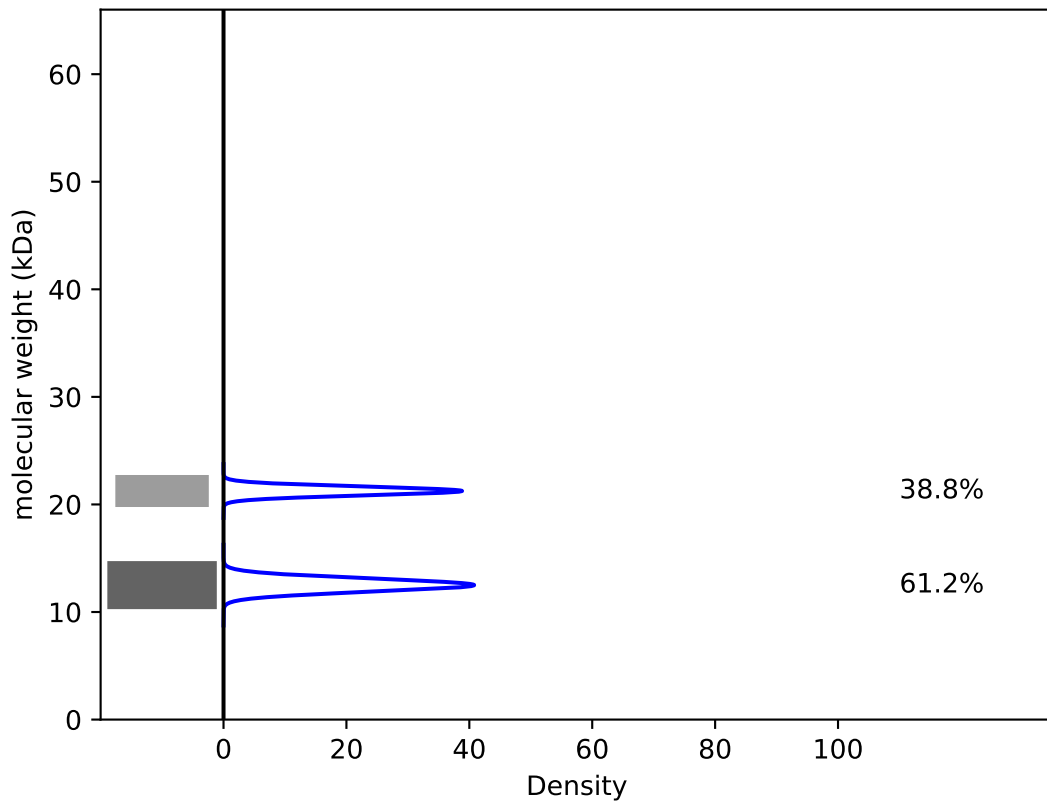

# P61916



# P61923



# P61956





# P61962



# P61964



# P61978

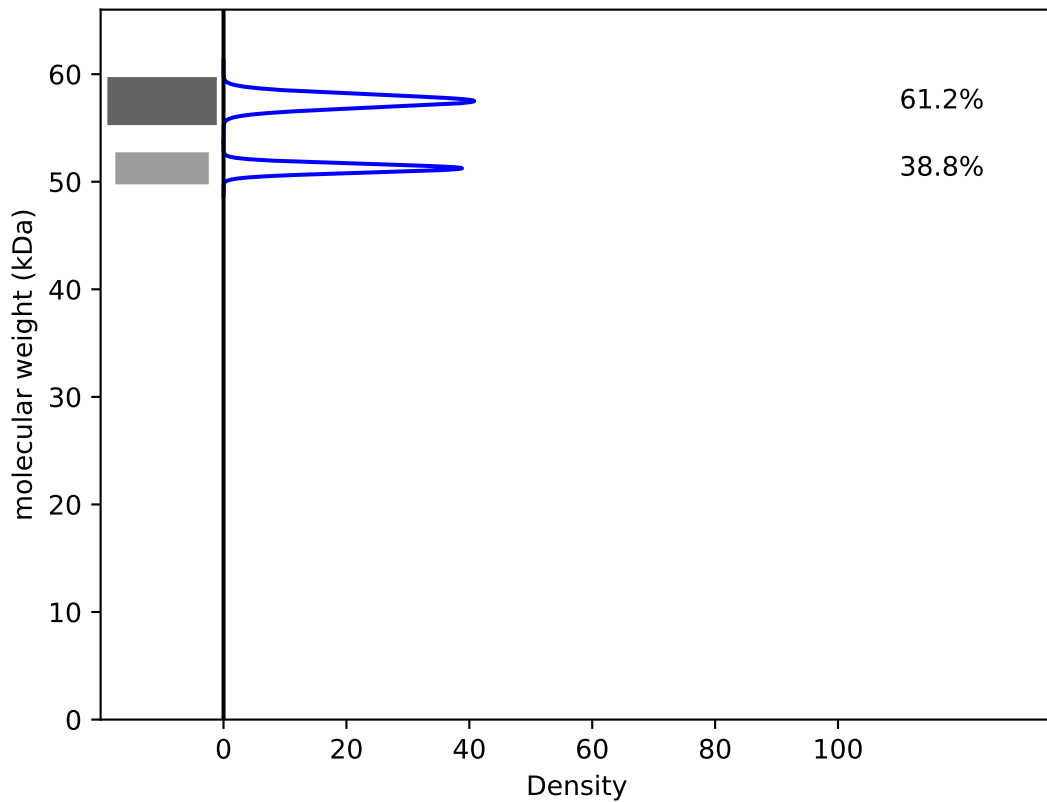

# P61981



# P62070



# P62081



P62136



# P62140





P62191



# P62195



P62241



P62244



# P62258



P62263



P62266



# P62269





P62273



P62277



# P62280

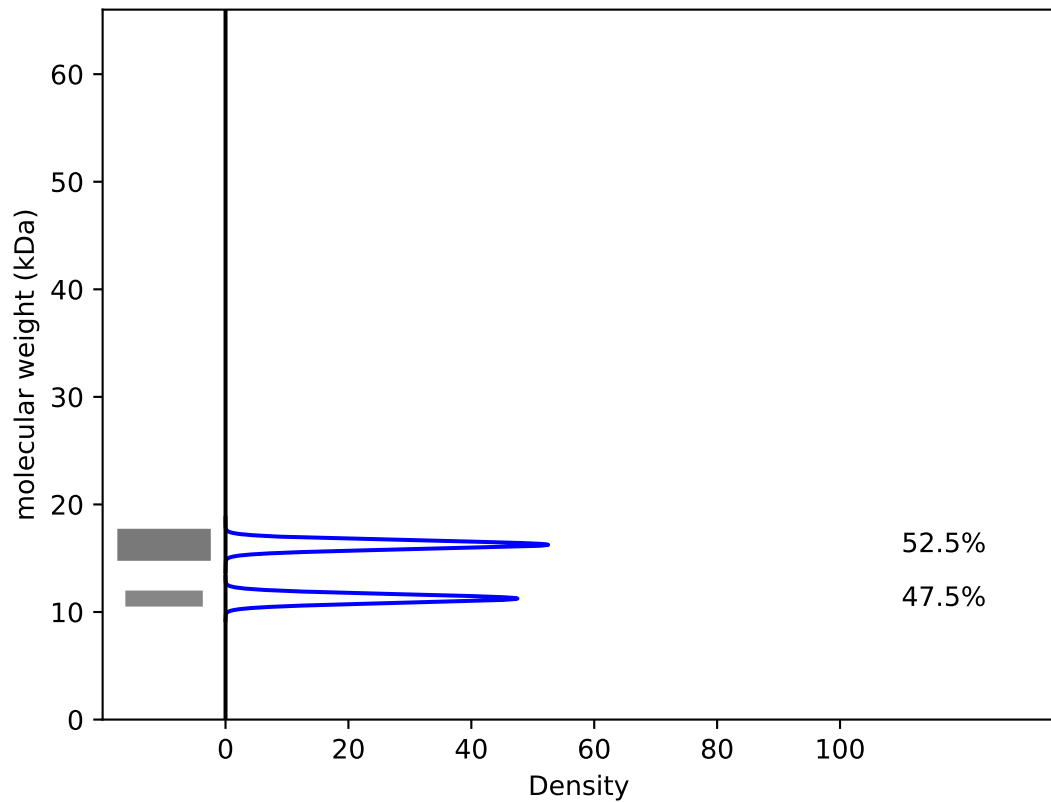

# P62314



# P62316



# P62318



# P62380



P62424





P62495



P62633



# P62699



# P62701



# Q8TD47



# P22090



P62745



P62750





P62753



# P62805



# P62820



# P59190



P62826



# P62829



P62841



# P62847

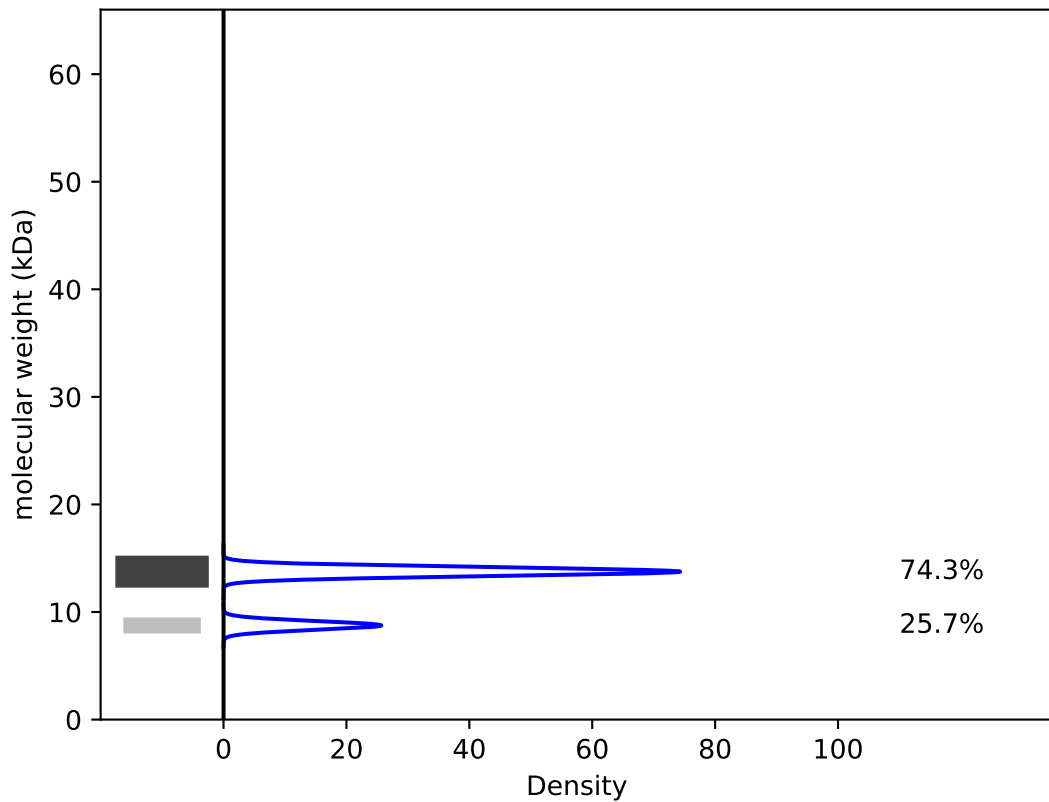



P62851



P62854



# Q5JNZ5



P62857



# P62861

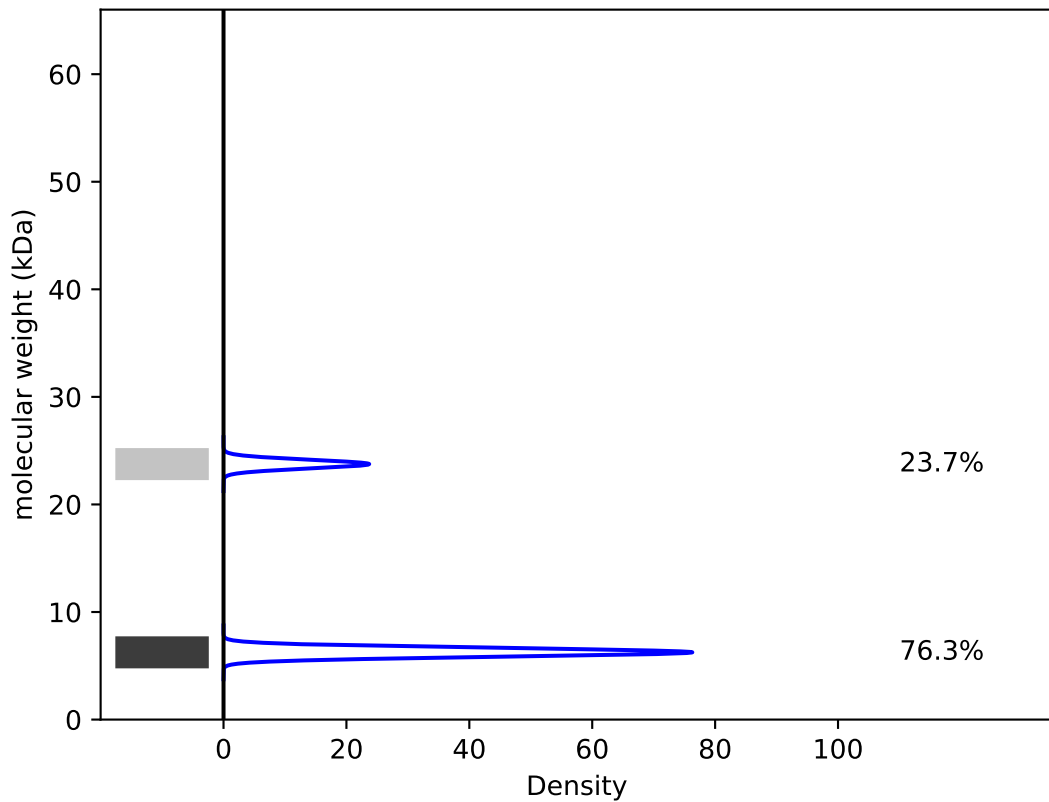

# P62888



# Q59GN2



P62891





# P62899



# P62906



# P62910



P62913



# P62917

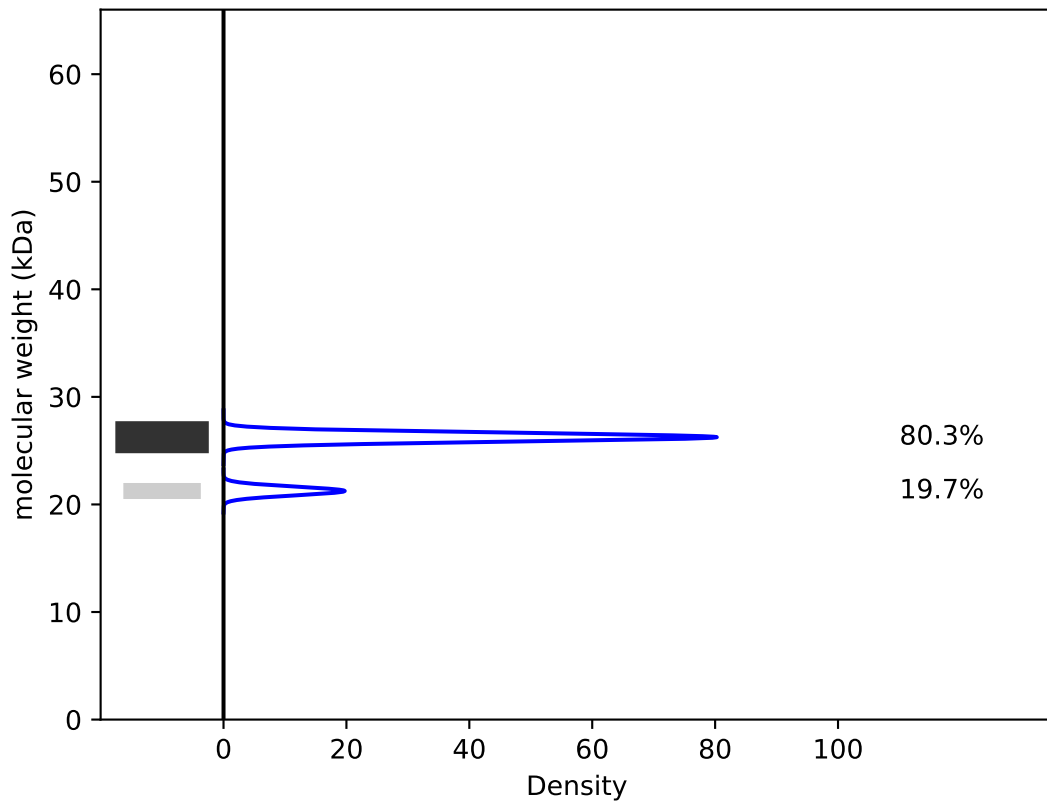

P62937



# Q9Y536



# PODN26





# F5H284

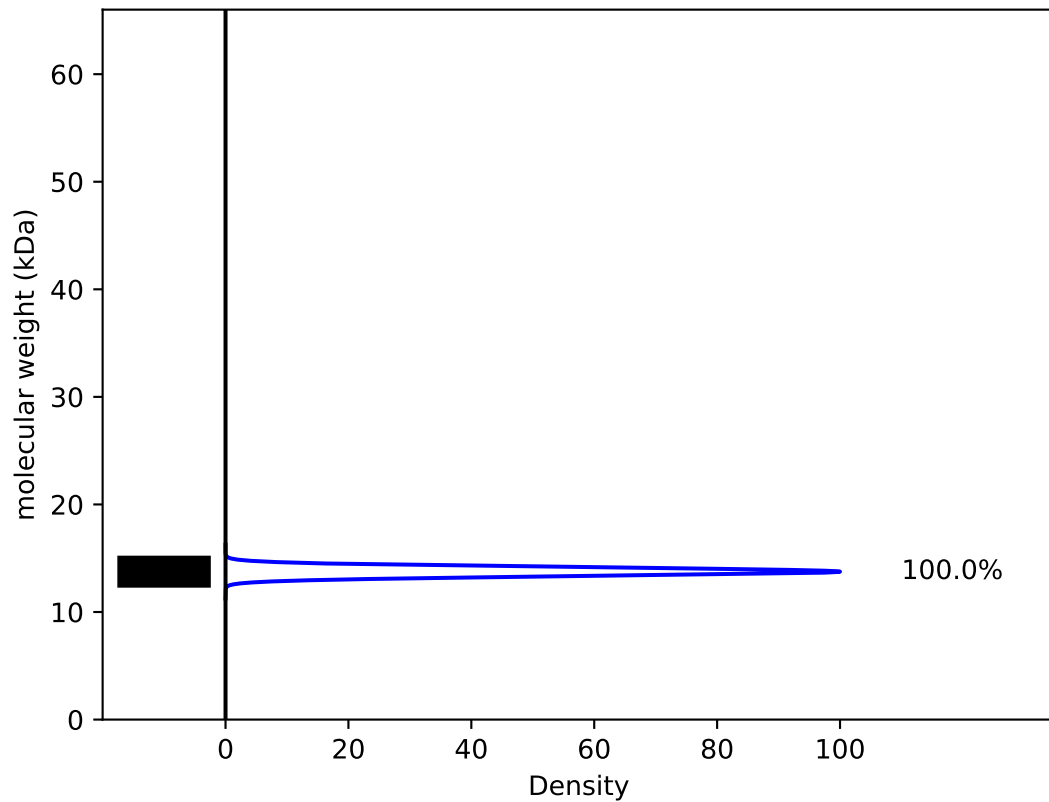

A0A0B4J2A2

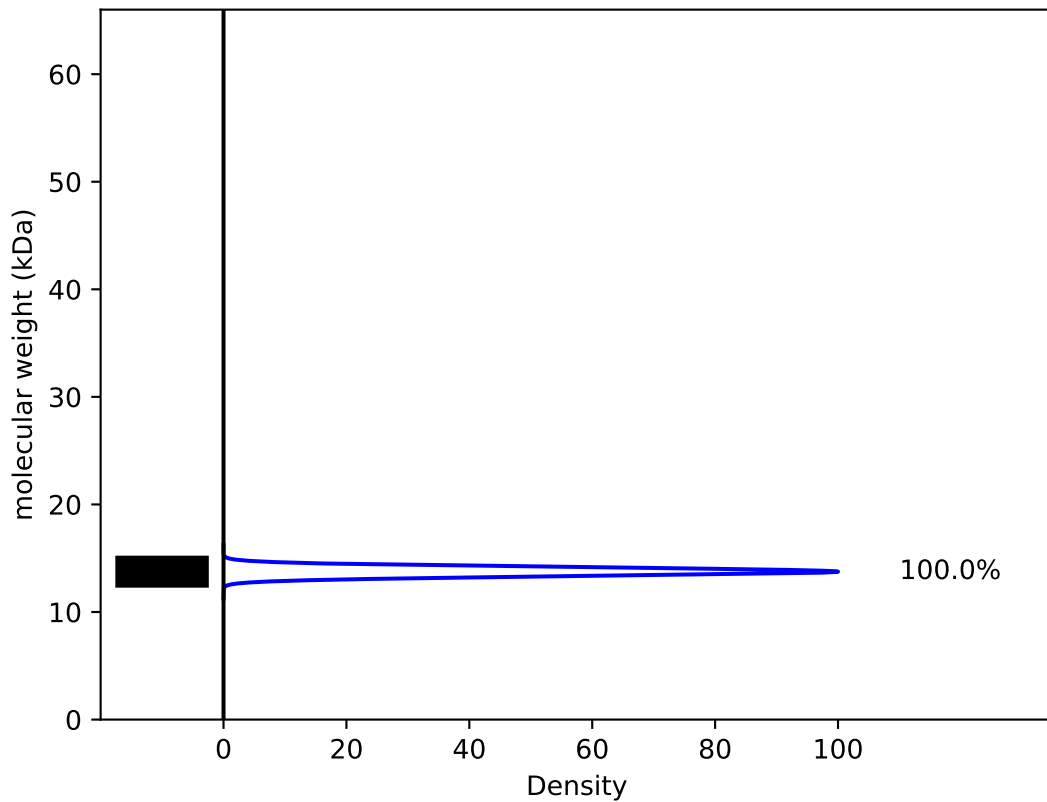

# A0A075B759



# PODN37



P62942



# P62993



# P63000



# P15153





# Q15836



P63027



# P63092

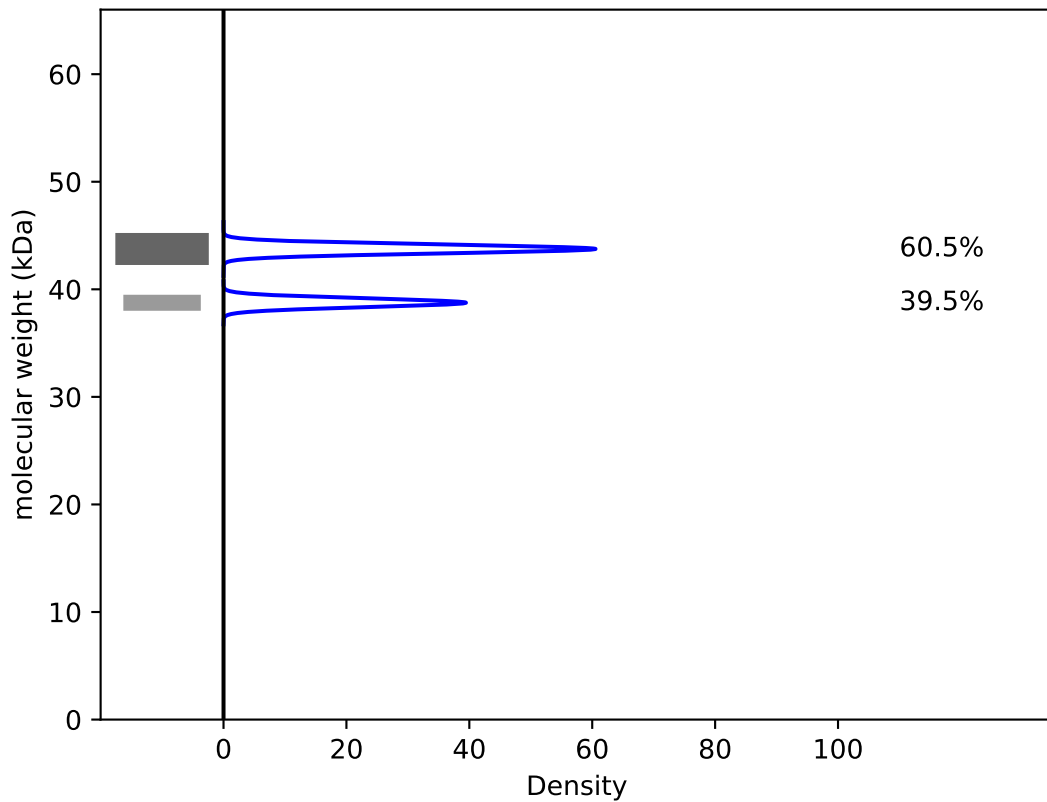

# P11488

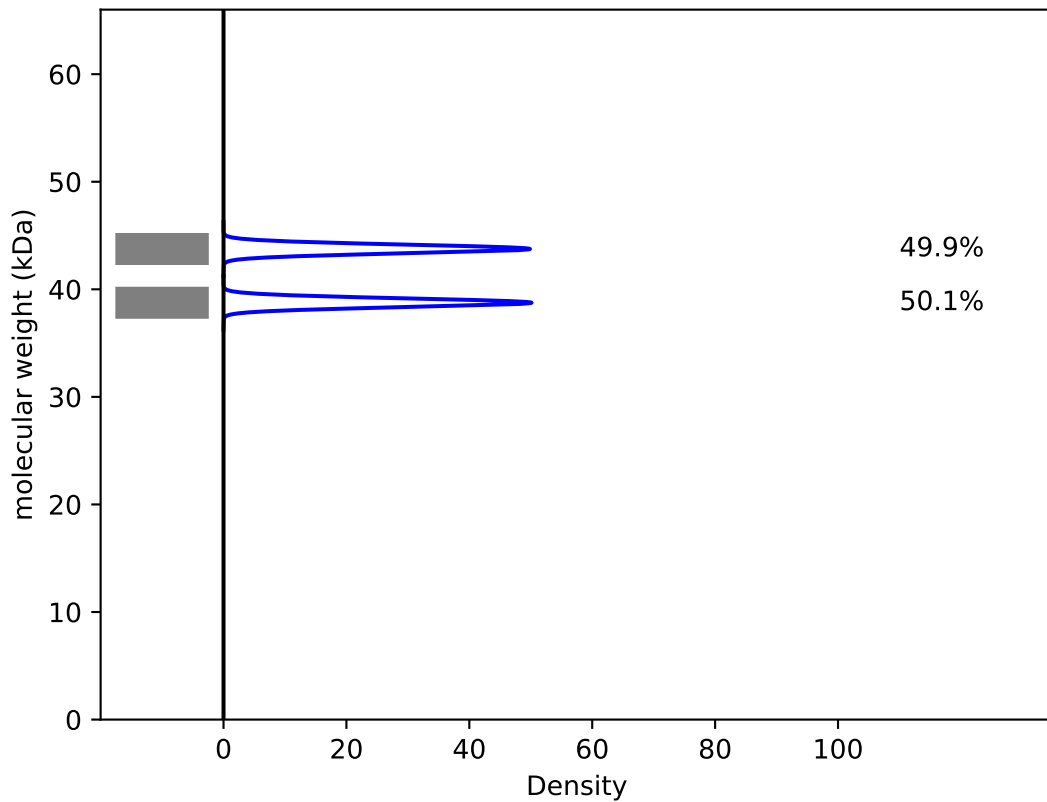

# P19087



P09471



# A8MTJ3



# P38405





# P63096



P63104



# P63151



# Q66LE6



Q00005

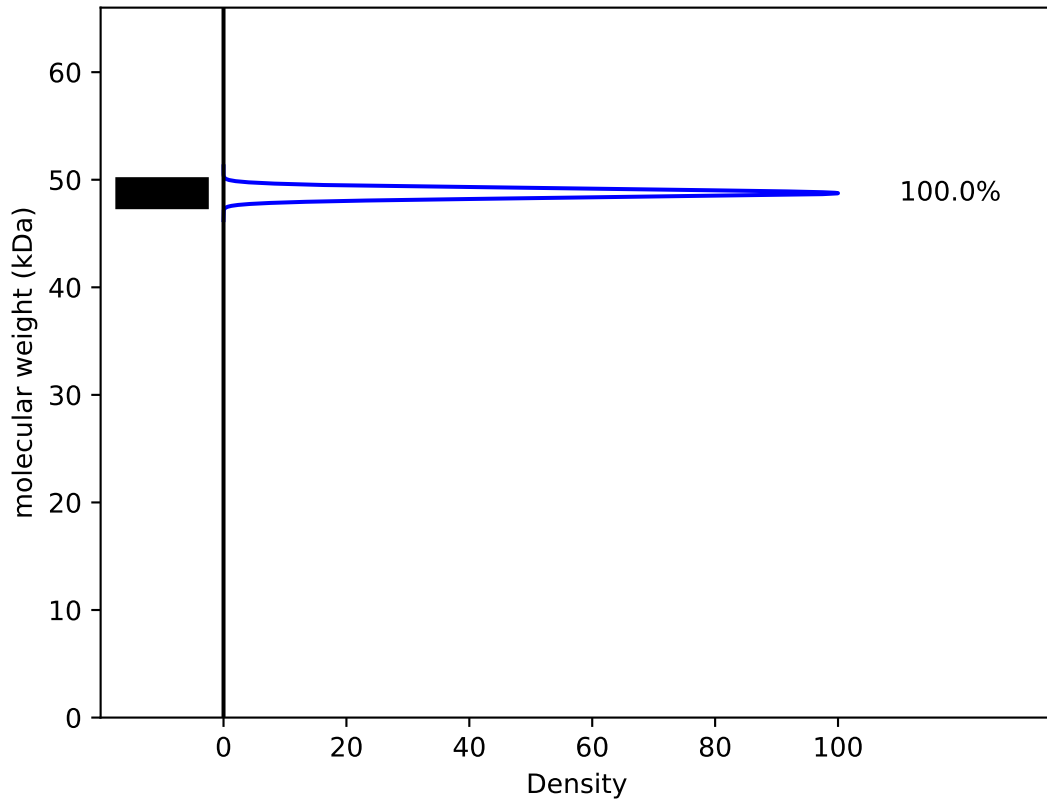

Q9Y2T4



# P63165



# P63167





# P63172



# P63173



# P63220

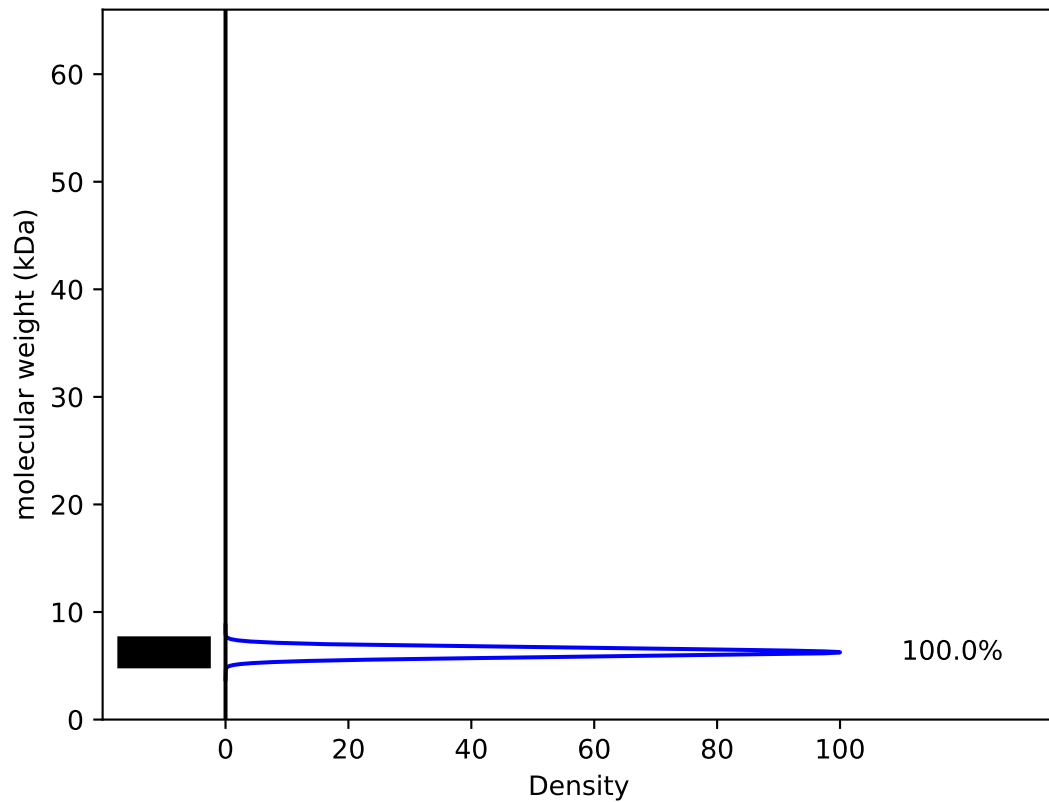

P63241



# Q6IS14

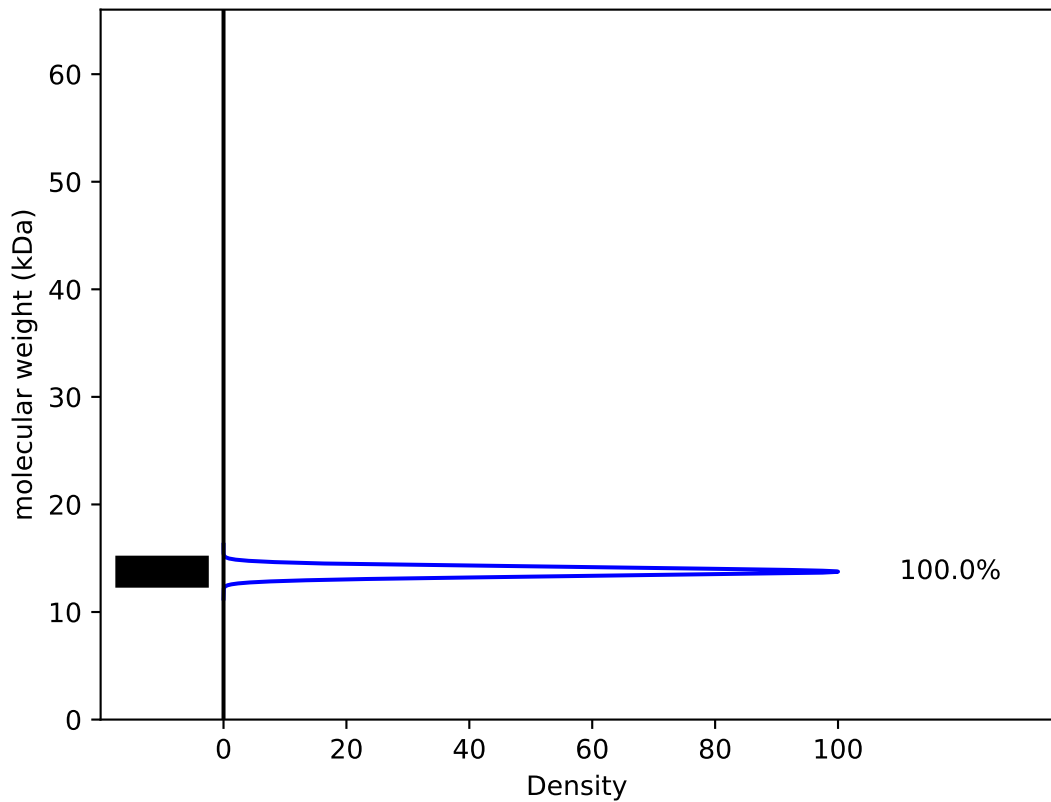

# Q9GZV4



P63261



P63272





P63279



P67775



P62714



# P67809

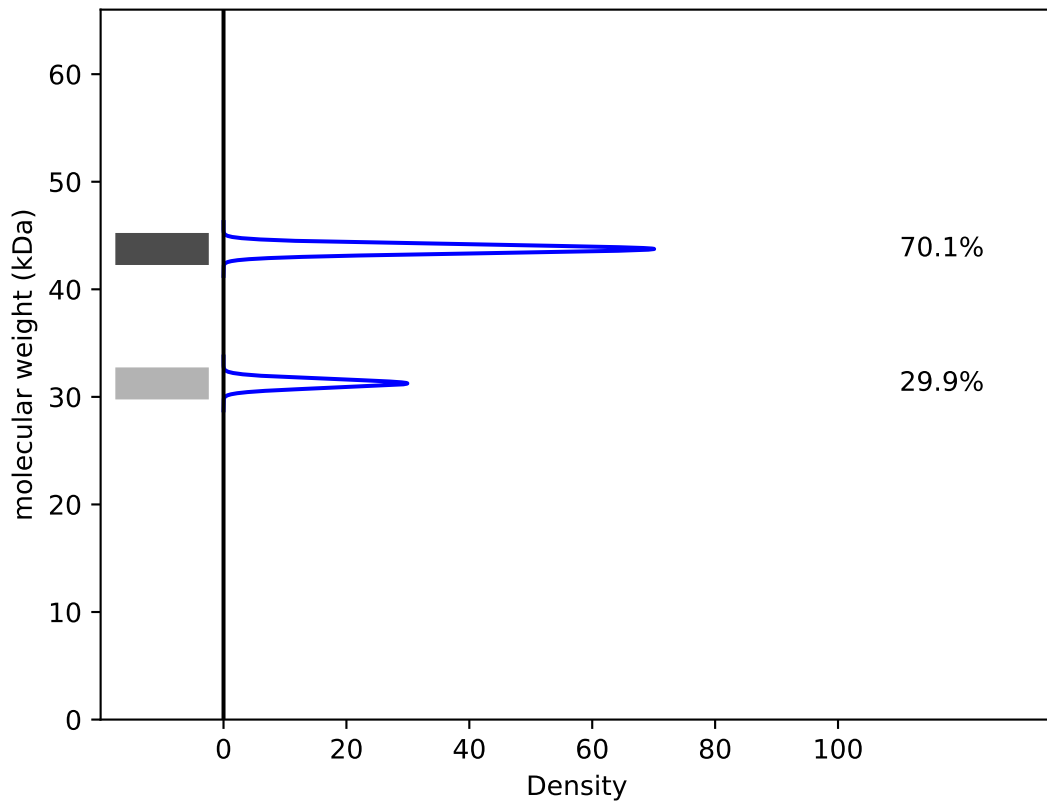

# P67812

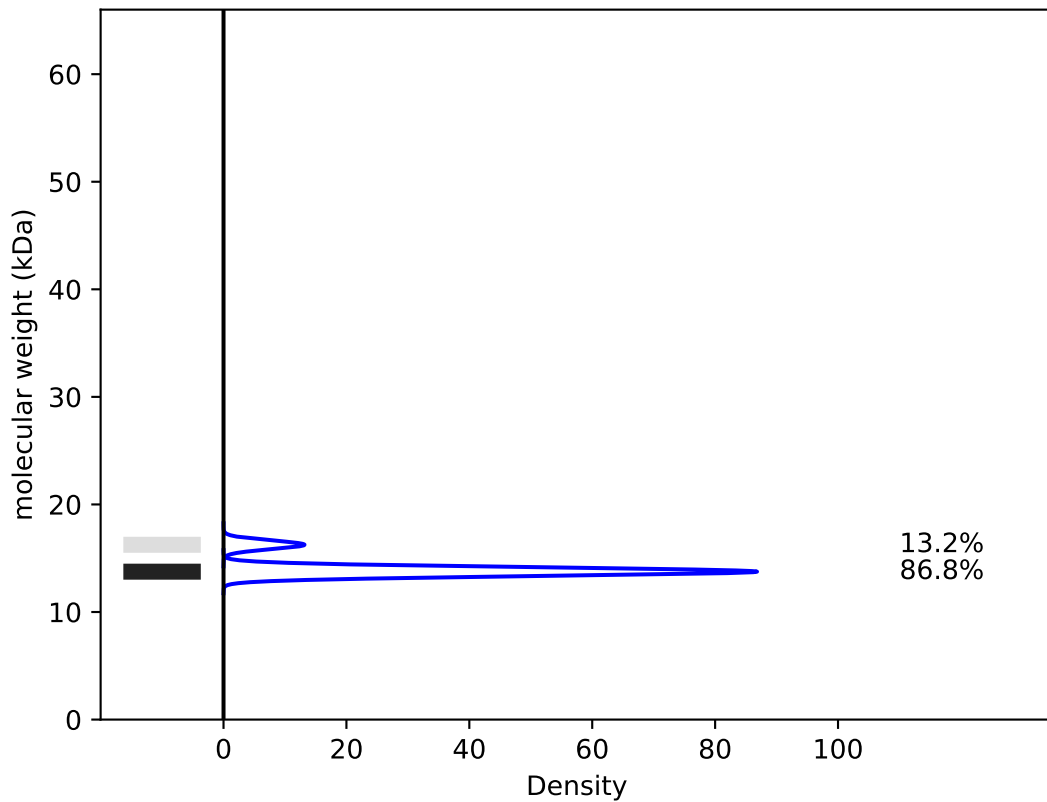

# POC7V7

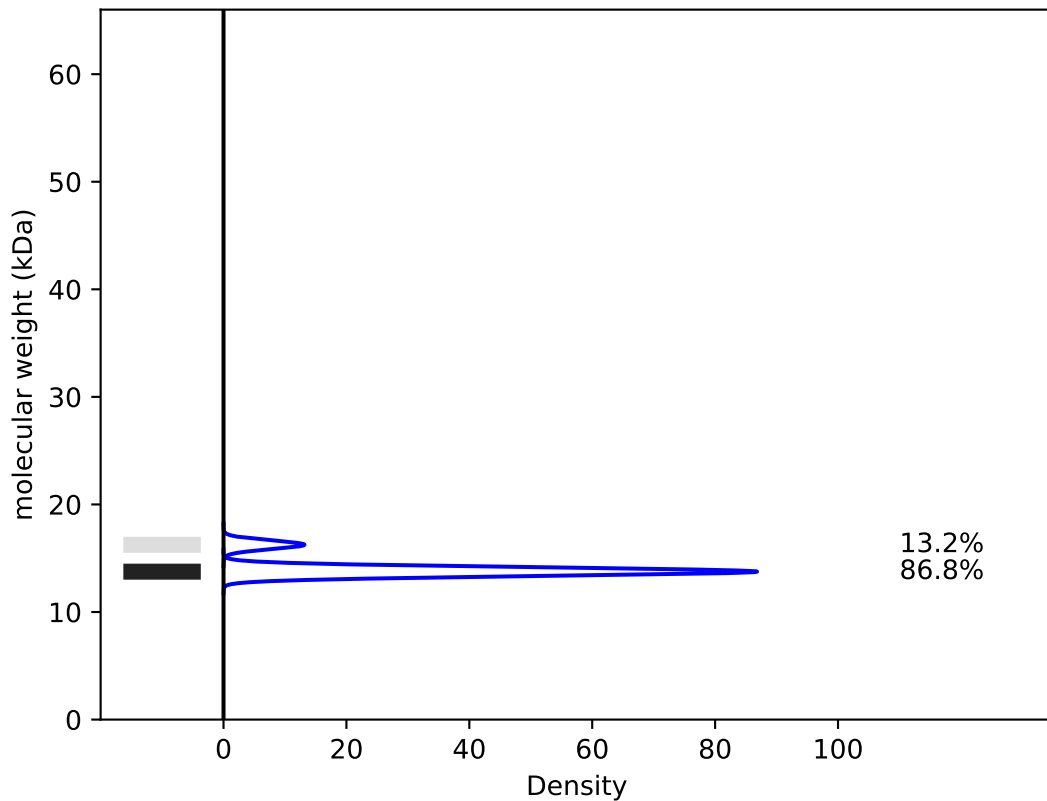

# P67870



# P68133





P68032



P63267



P62736



P68036



# Q5VTE0

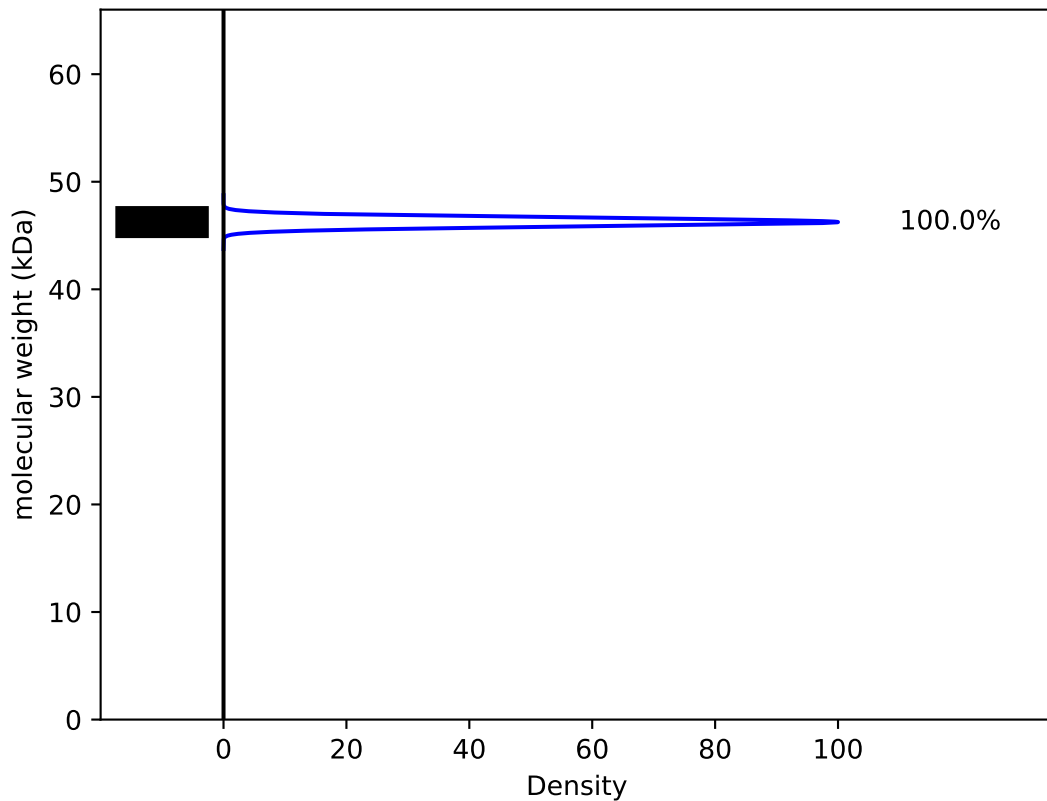

P68104



P68363



# A6NHL2





# P68366



P68371



# P68400

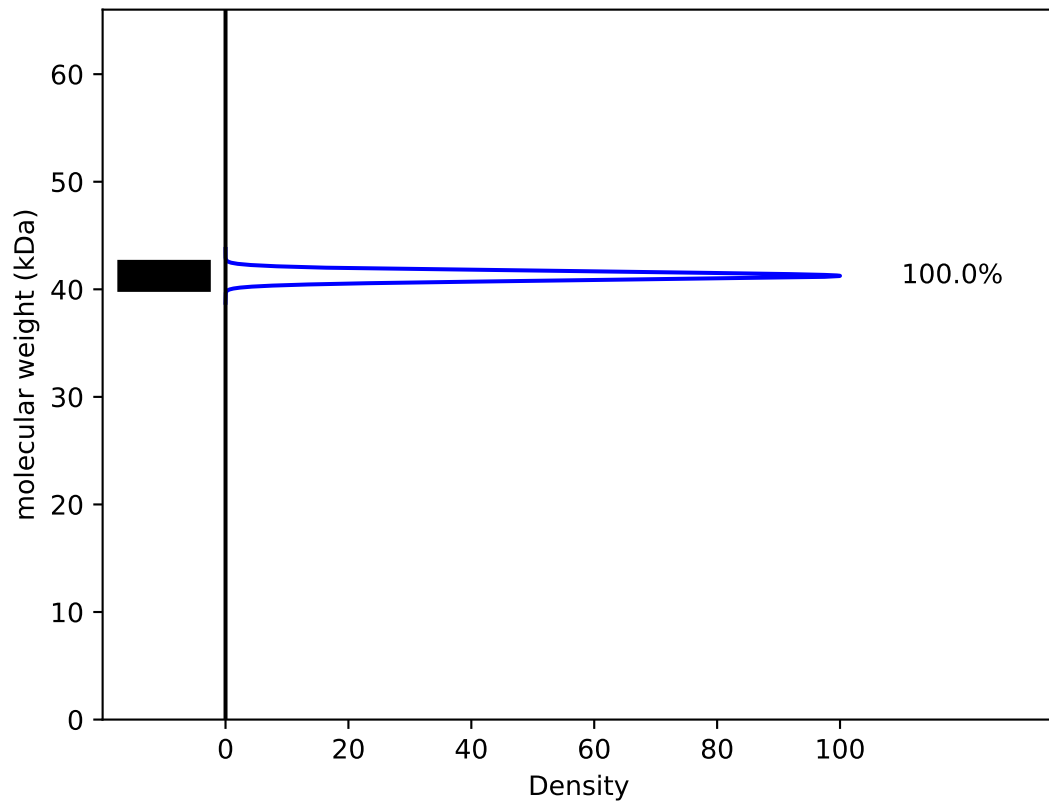

# Q8NEV1



# P68402



P68431



# Q16695



# Q6NXT2





# P78318



# P78330



# P78346

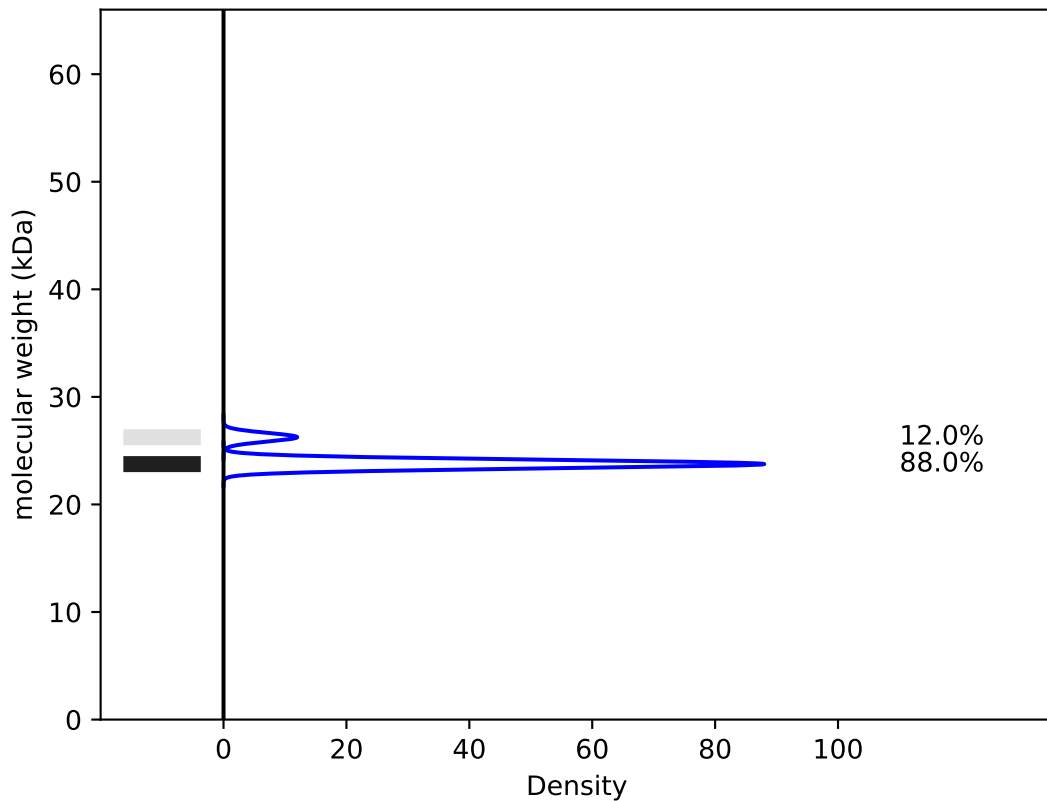

P78406



P78417



# P78540



P80217



# P80303





P82663



P82673



P82930



P82979



P83731



# P83916



P84077



# P61204





# P84090



P84098

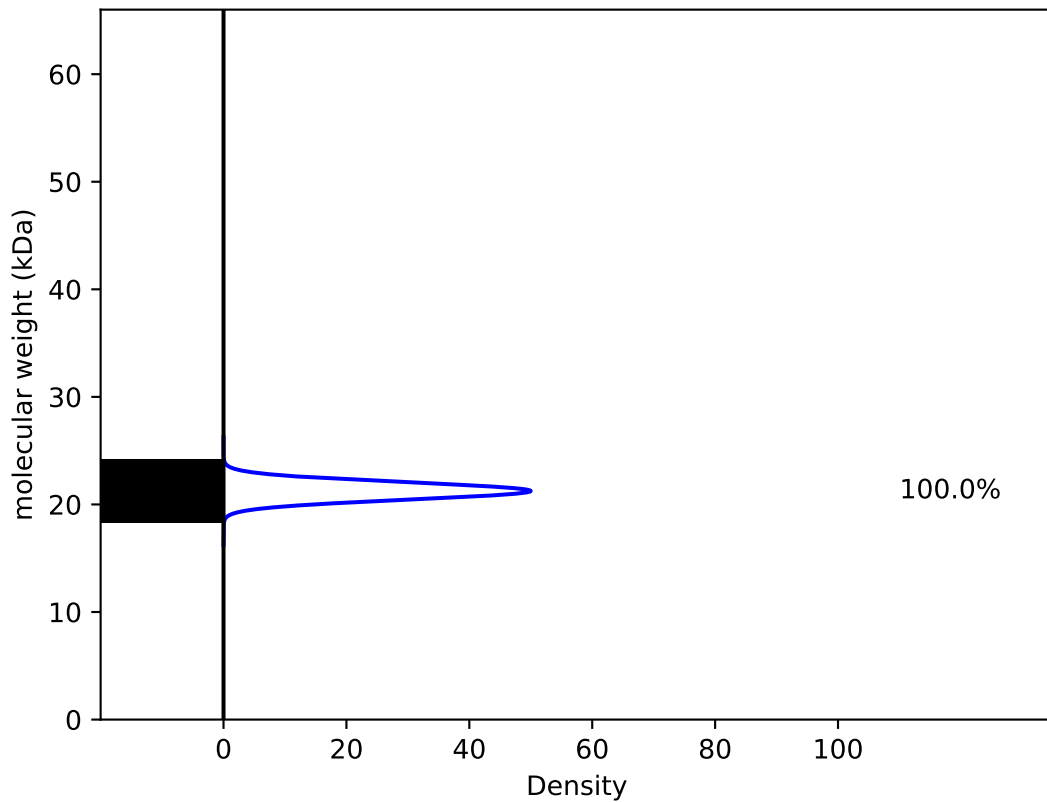

P84103



P84243



# P98179



P99999



Q00169



Q00534





# Q00535

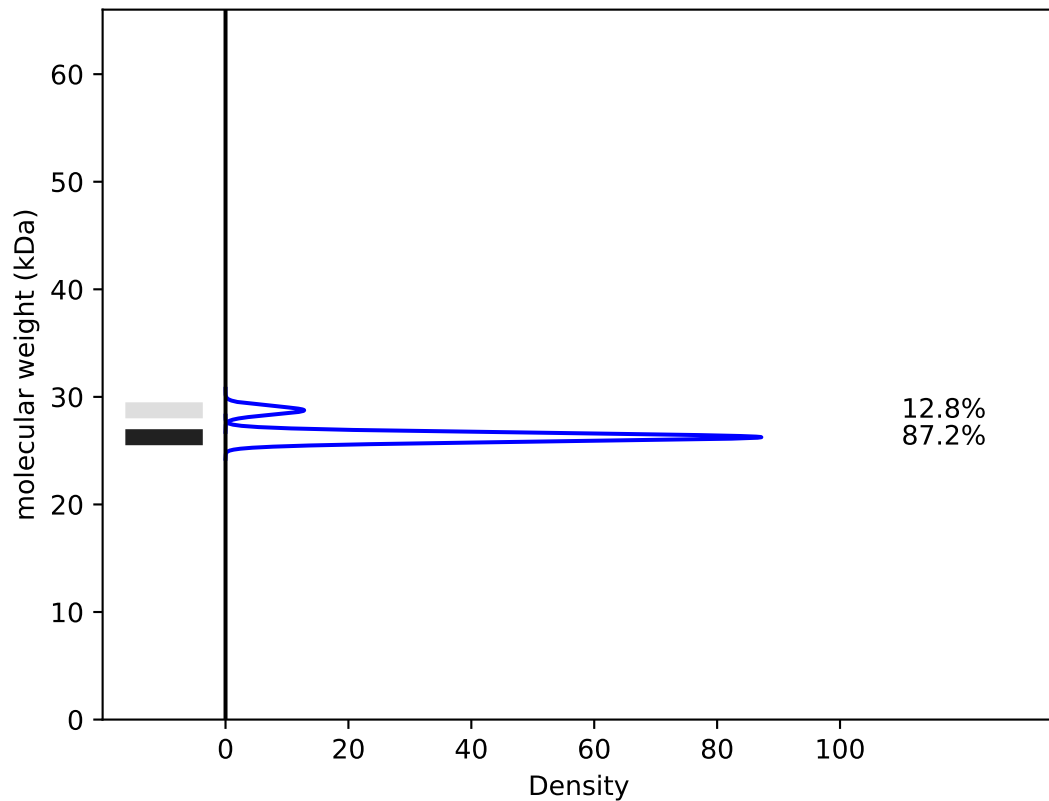

Q00577



Q00688



Q00796



# Q01085



# Q01105

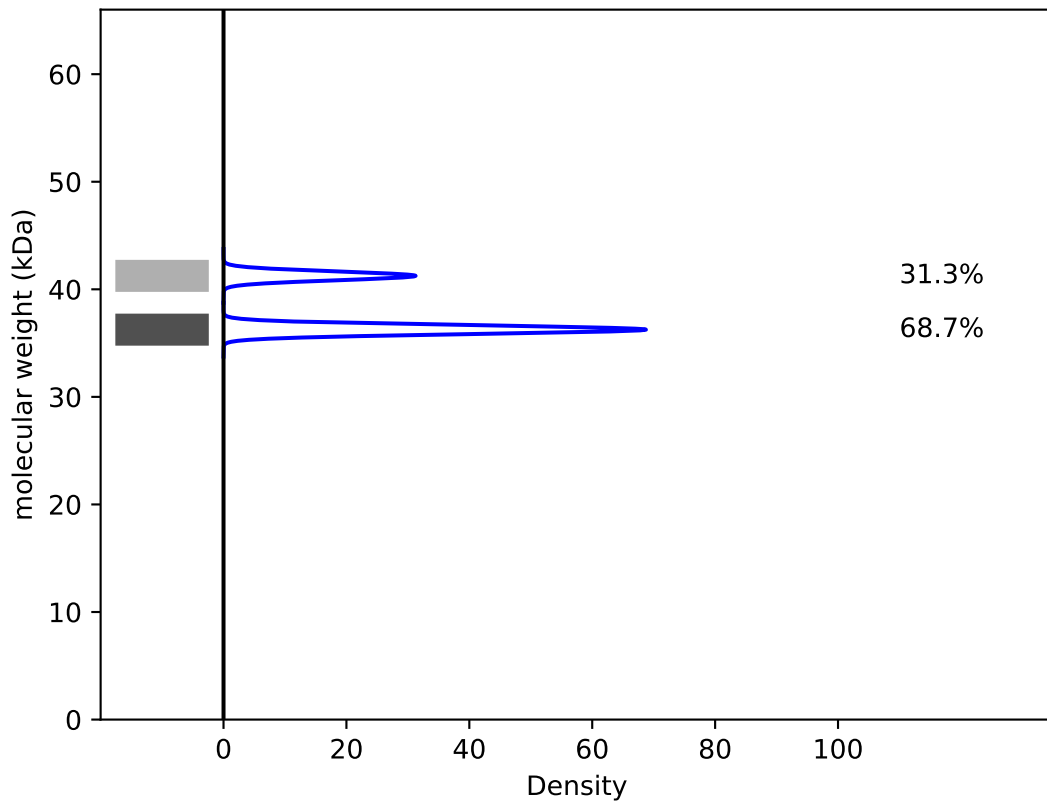

# PODME0

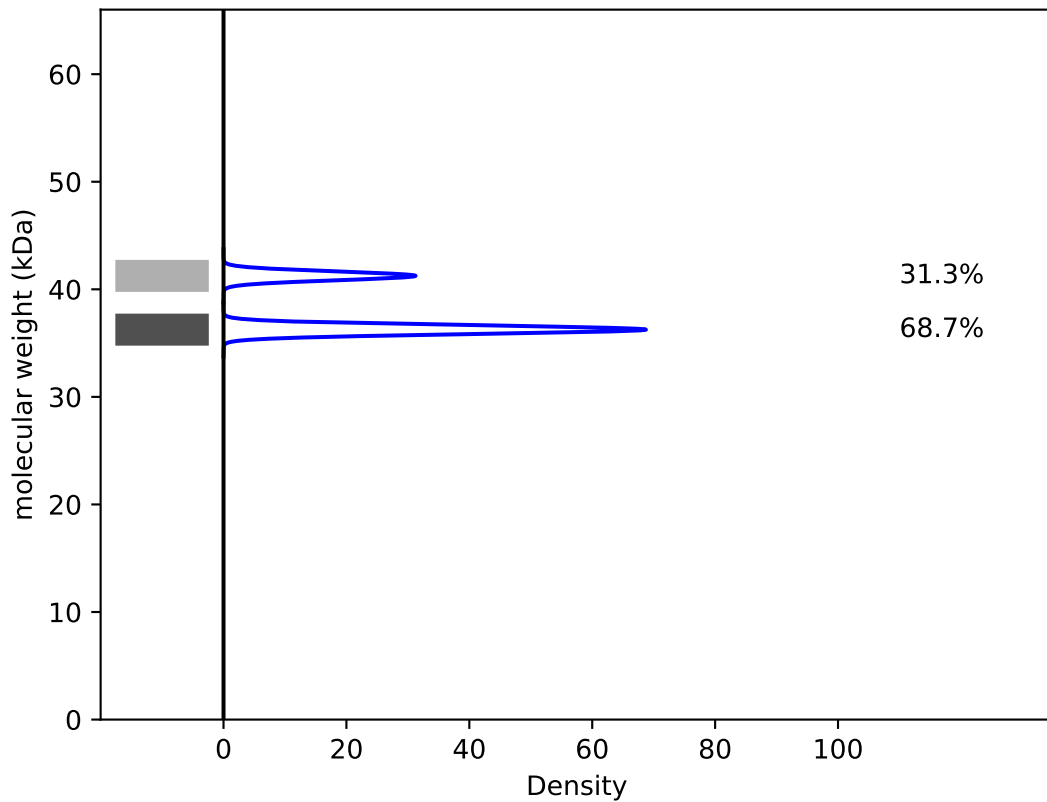

Q01130





# Q9BRL6



Q01469



# A8MUU1



Q01518



# Q01581



Q02127



Q02543



Q02750





Q02790



Q02878



Q03426



Q04323



Q04917



Q05048

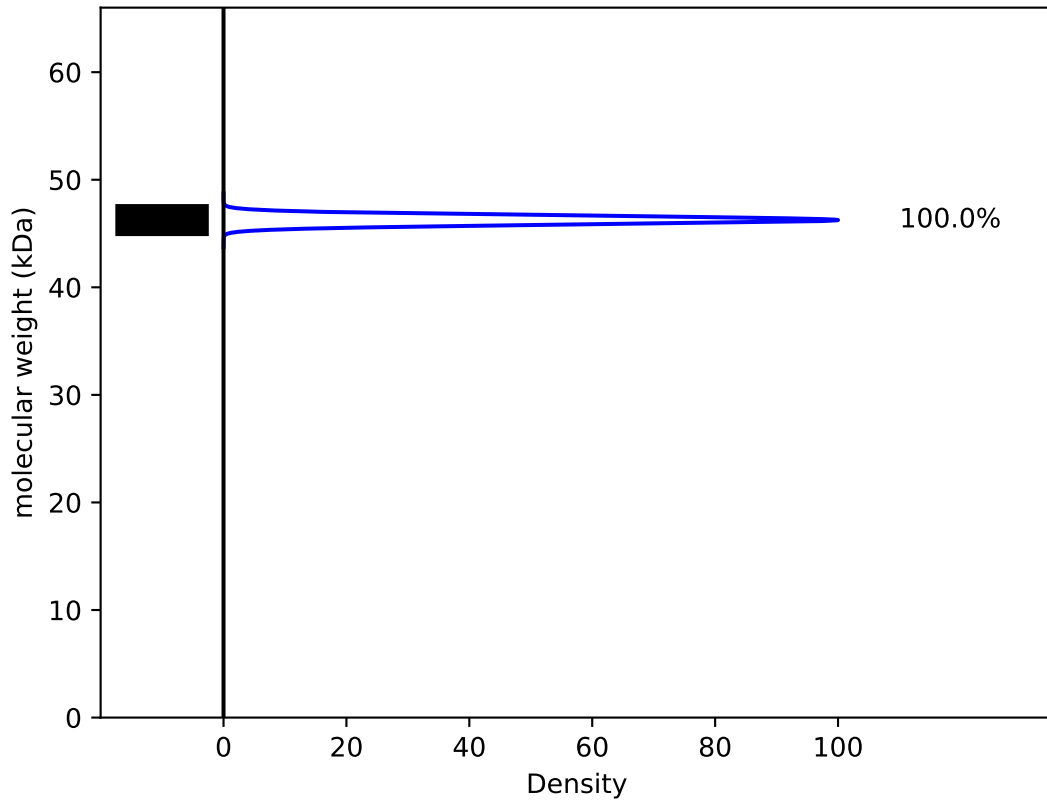

Q05639



Q06203





# Q06265

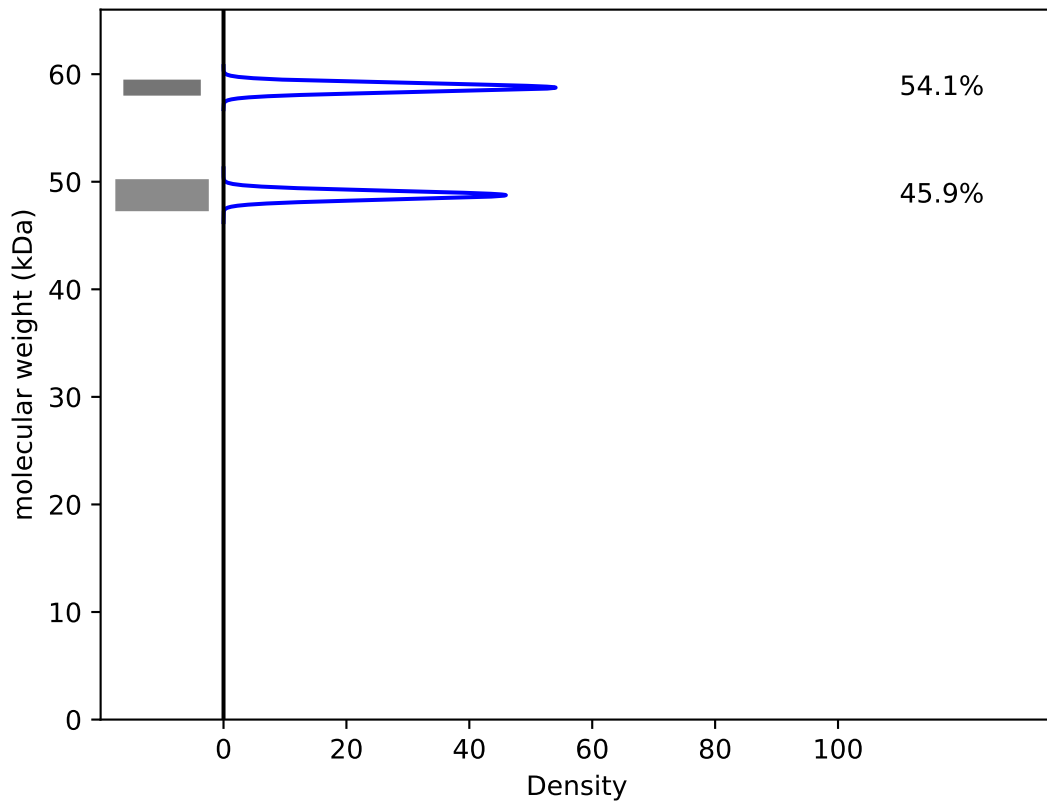

Q06323



Q06830

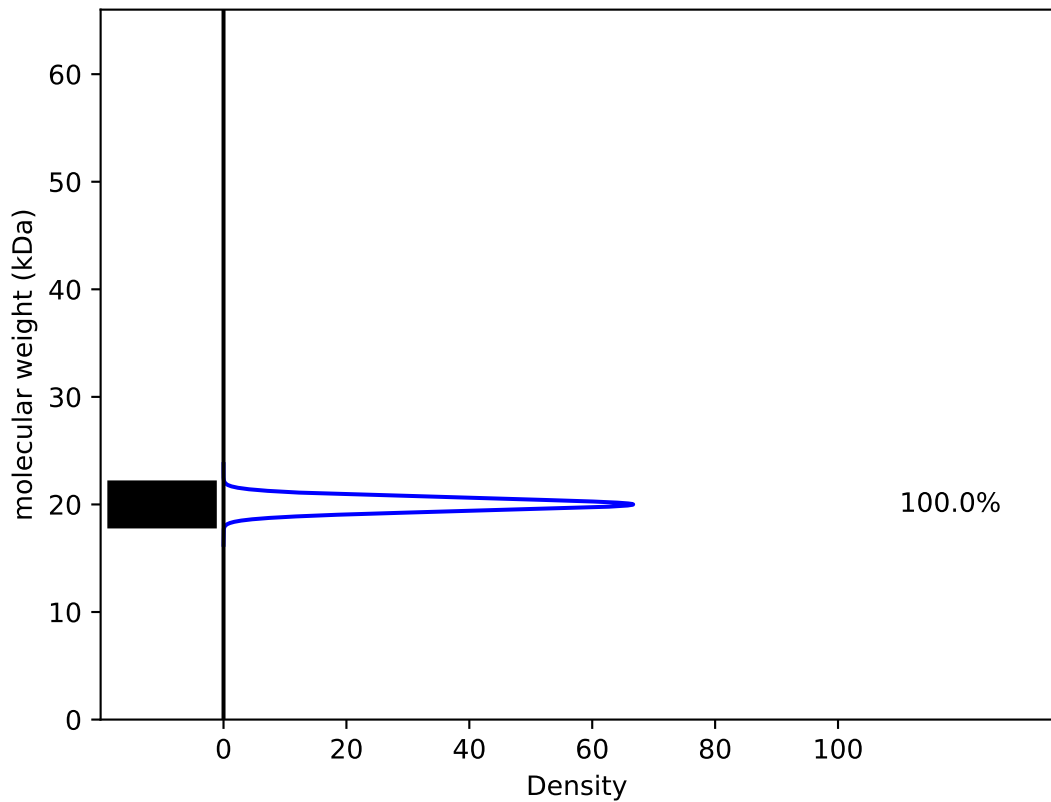

Q07020



Q07021



# Q96K21



Q07812



# Q07955





Q08257

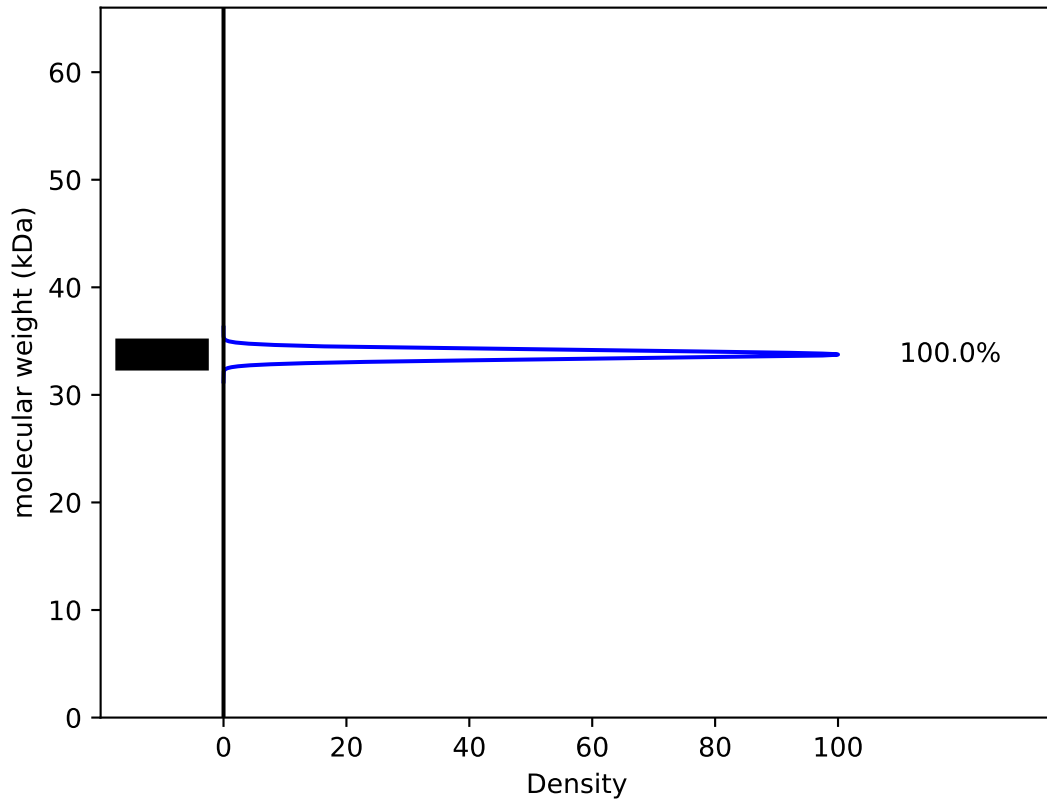

Q08752



Q09028



# Q0VDF9



# Q10589

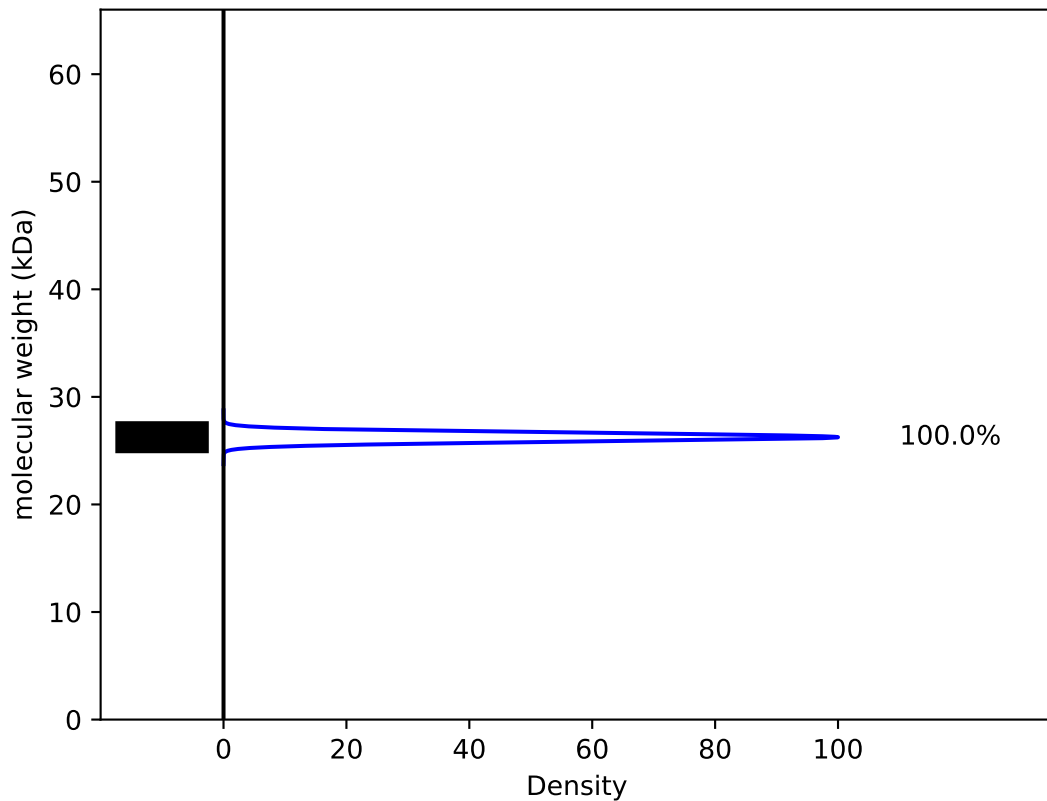

Q12765



Q12792



# Q12800





# Q9NZI7



# Q12824



# Q12846

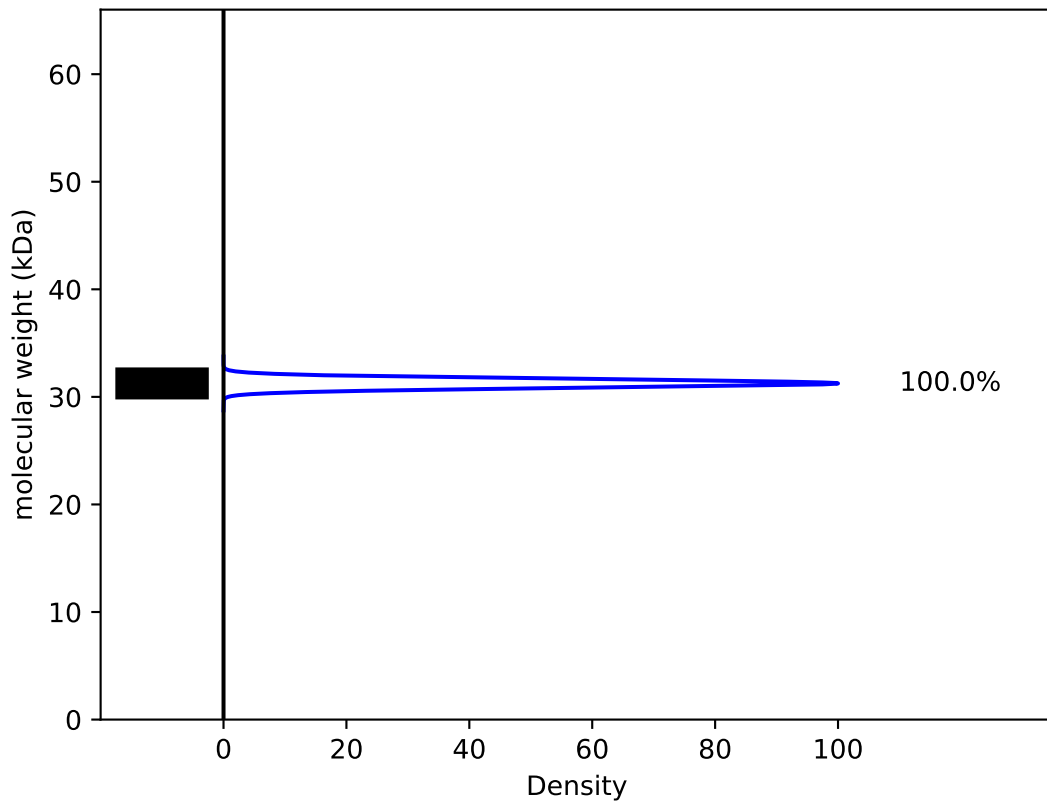

# Q12849



# Q12904



# Q12905



# Q12972



Q12974





Q93096



# Q13043



# Q13084



# Q13098



# Q13126



# Q13148



# Q13151

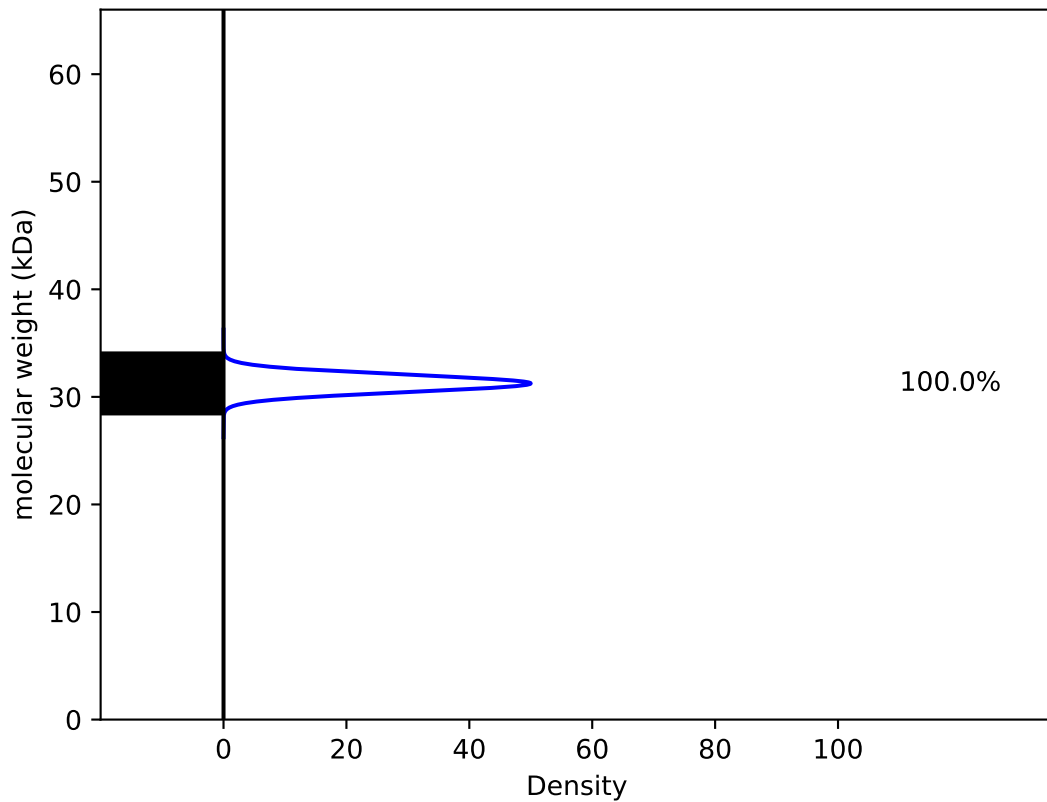

# Q13155





# Q13158



# Q13177

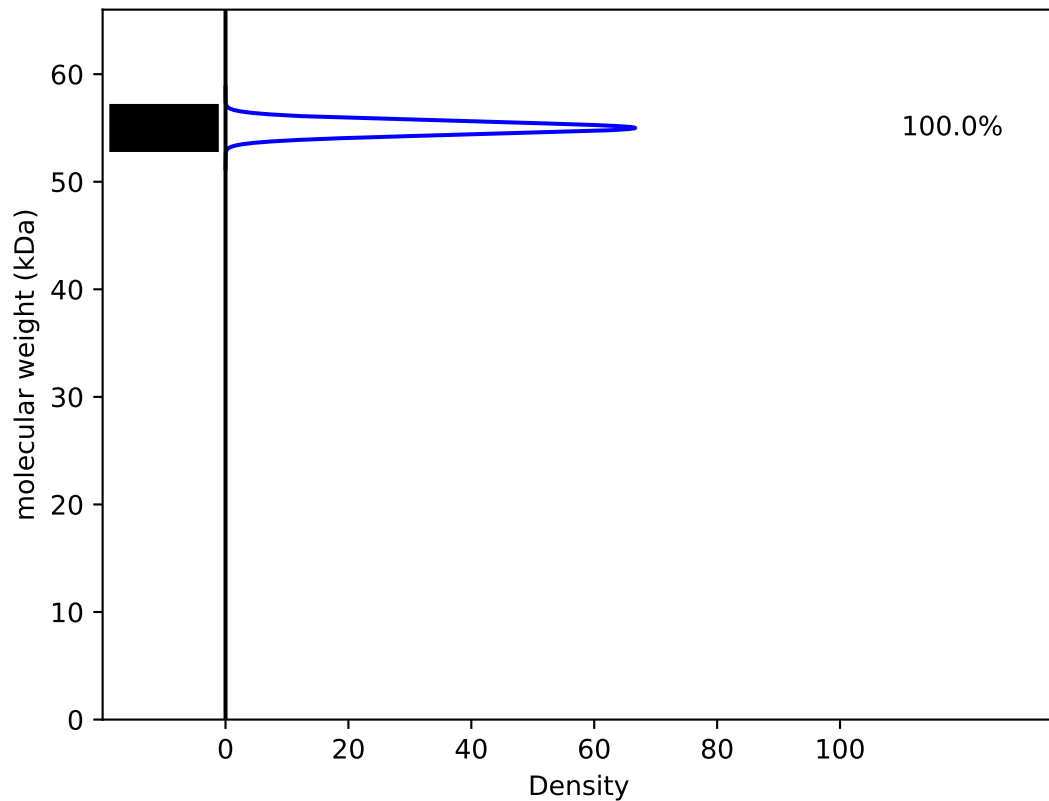

# Q13153



# Q13185



# Q13228



Q13242



Q13243



Q13247





Q13277



# POCB38



# Q13325



Q13347



# Q13363



Q13442



Q13451



# Q13509





# Q13526



O15428



# Q13547

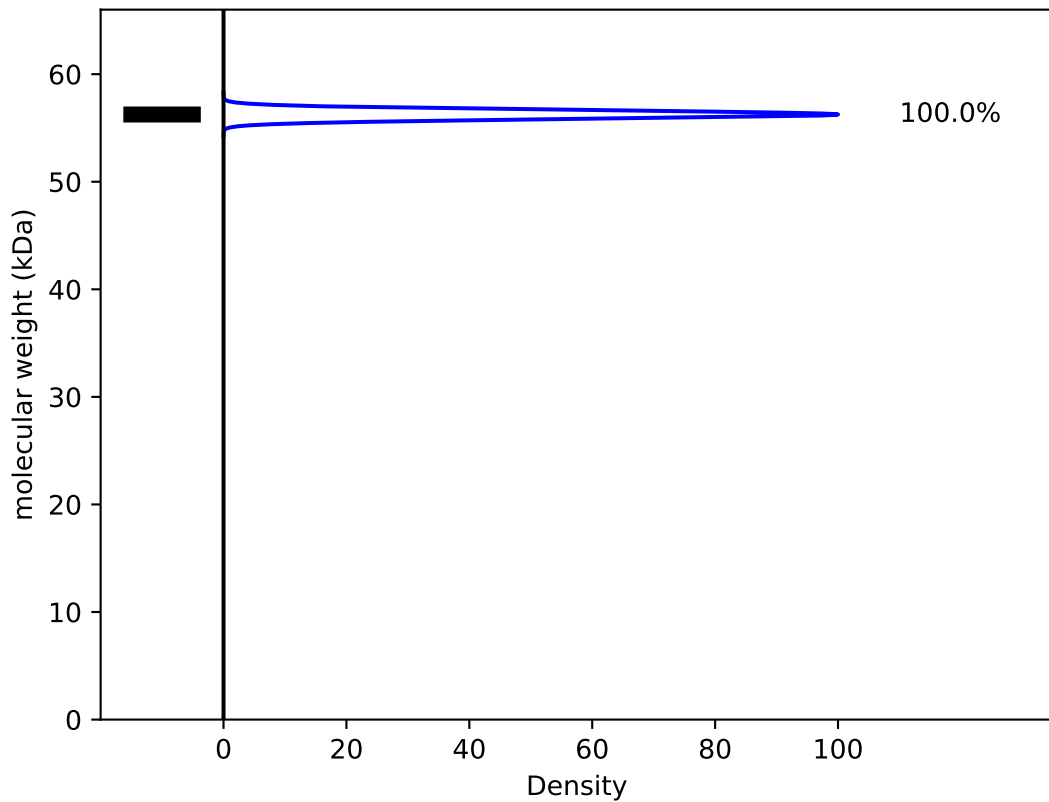

# Q13561



# Q13564



# Q13630



Q13685



Q13838





# Q13868



# Q13895



# Q13951

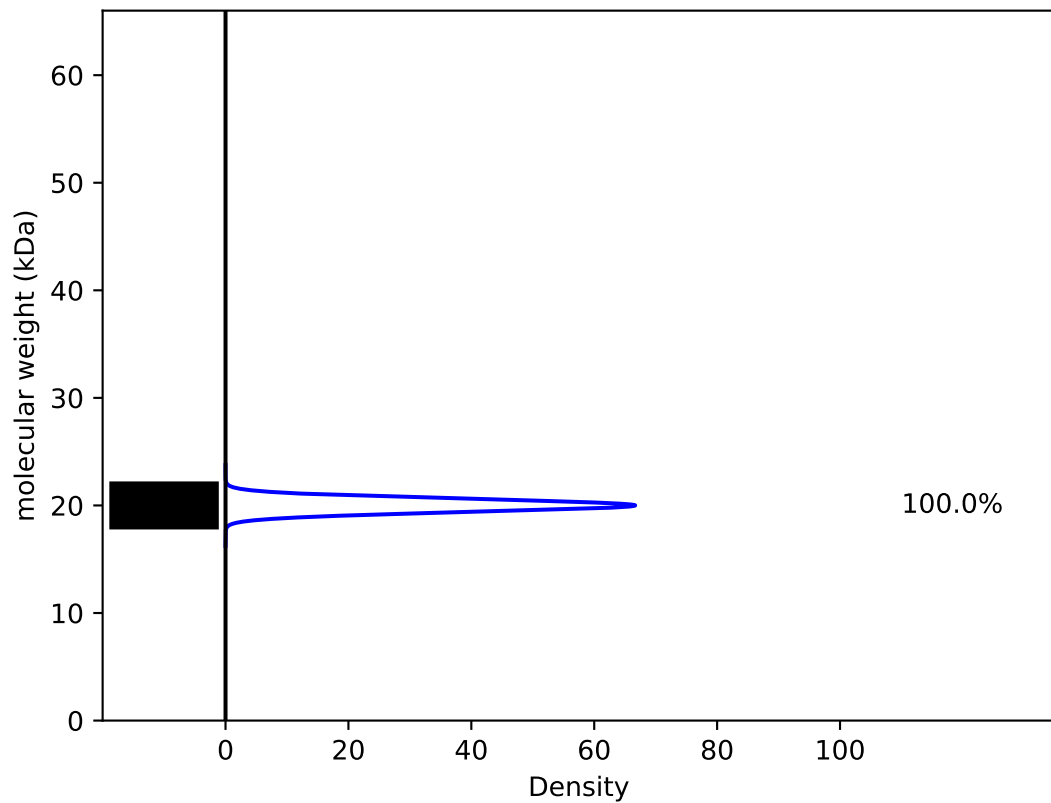

# Q14019



# Q14103



# Q14141



Q14165



# Q14232





# Q14240



Q14254



Q14318

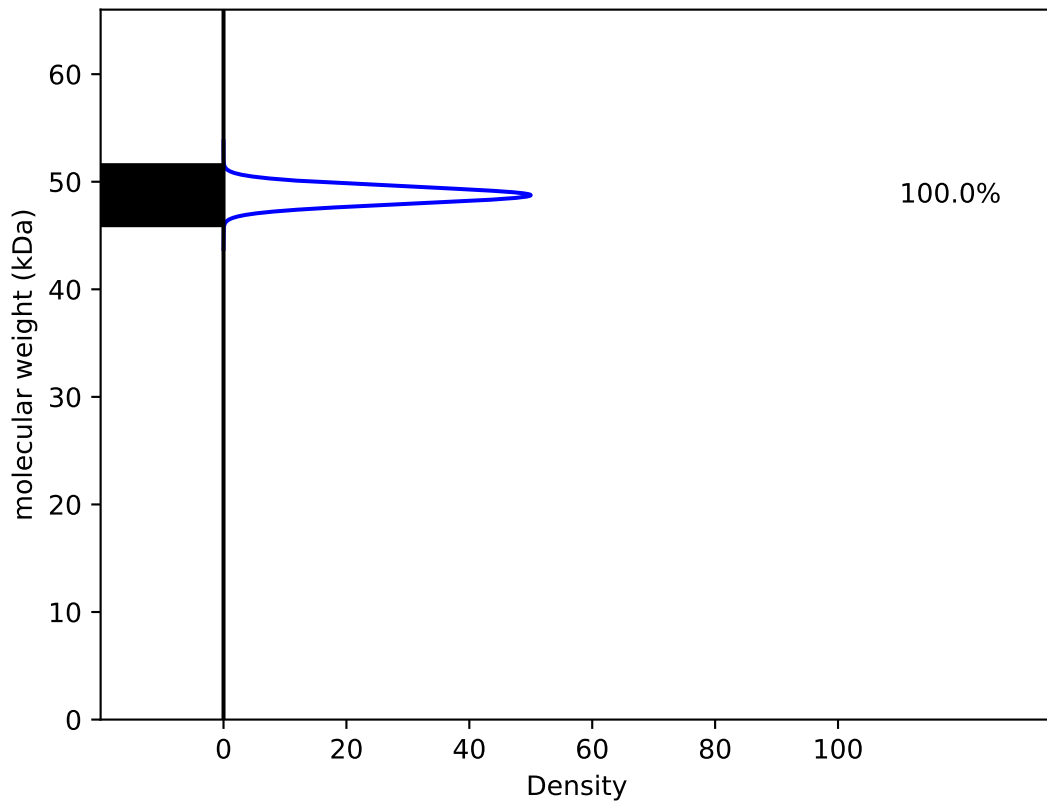

# Q14320



# Q9Y247



# Q14554



# Q14558



Q14657





Q14691



# Q14696



# Q14919



# Q15005

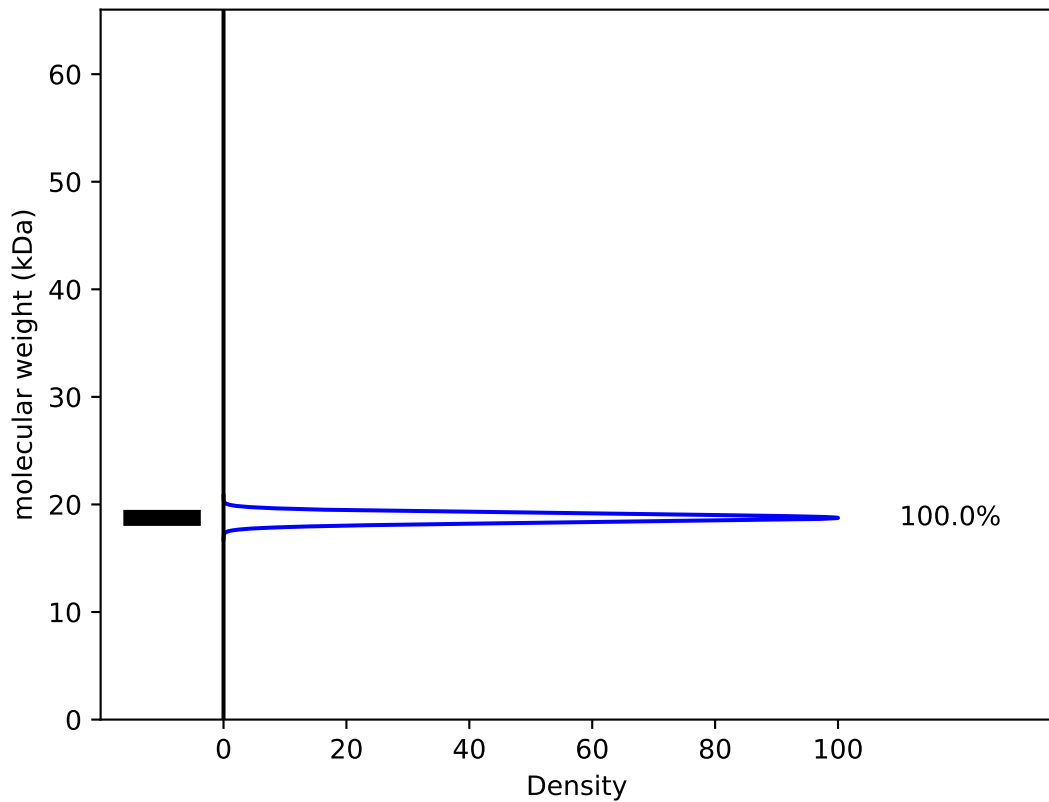

# Q15006



# Q15008



# Q15018



# Q15019





# Q15024



# Q15056



# Q15084



# Q15102



# Q15126



# Q15165



Q15181



# Q15185





# Q15233

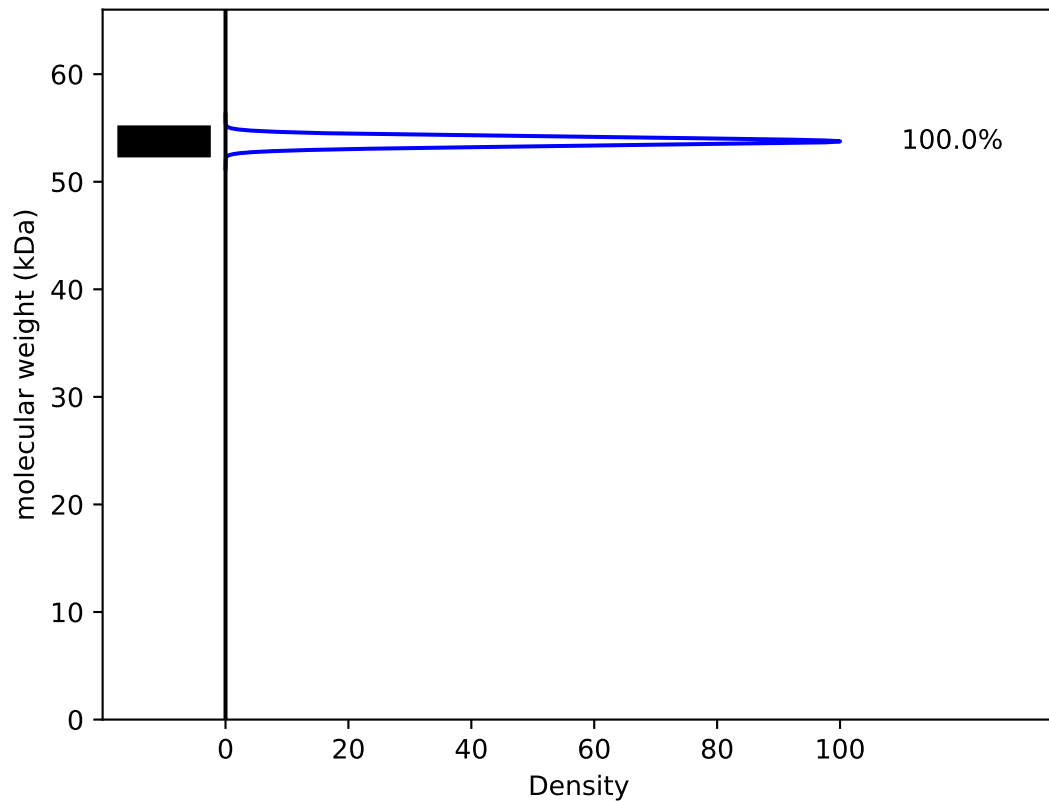

# Q15257



# Q15274



# Q15286



# Q15771



# Q15363



# Q15365



# Q15366

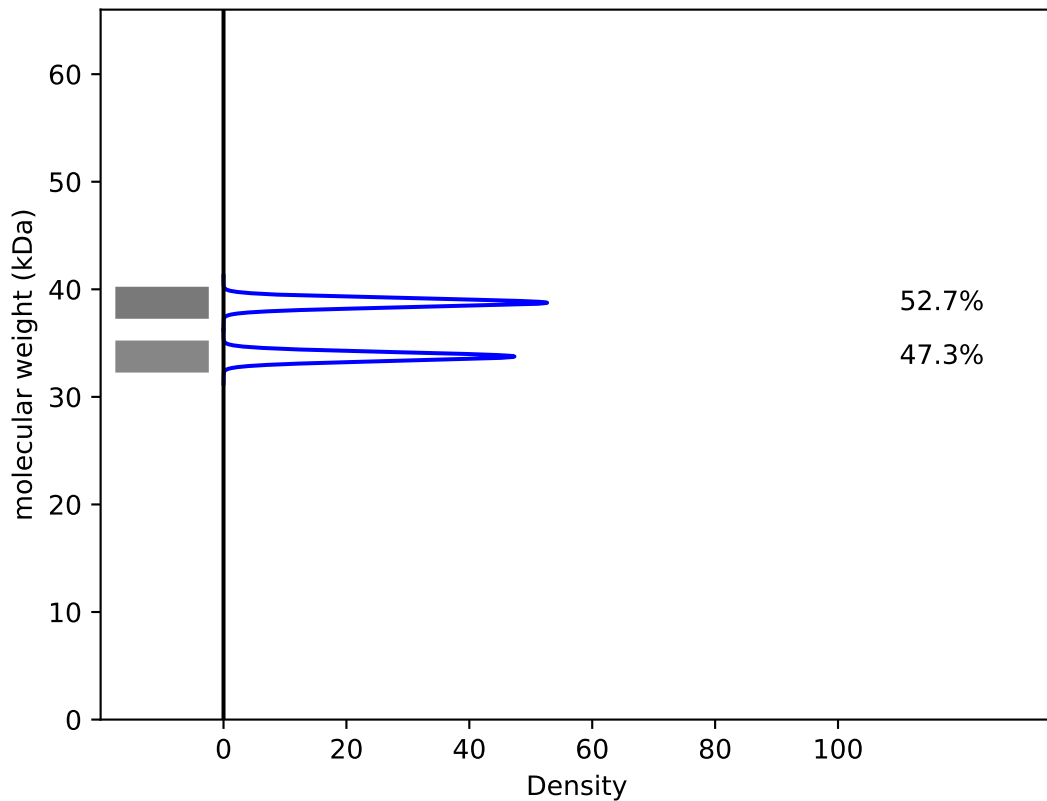



# P57721

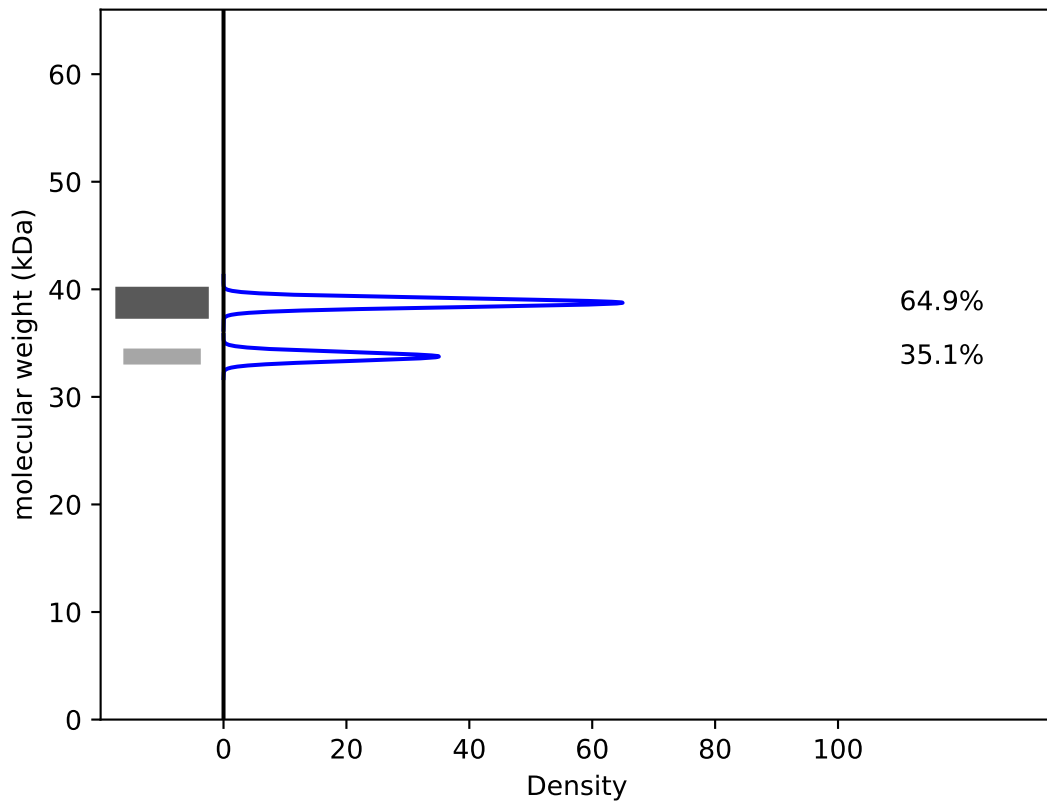

# Q15370



Q15427



# Q15435



# Q15554



# Q15555



# Q9UPY8

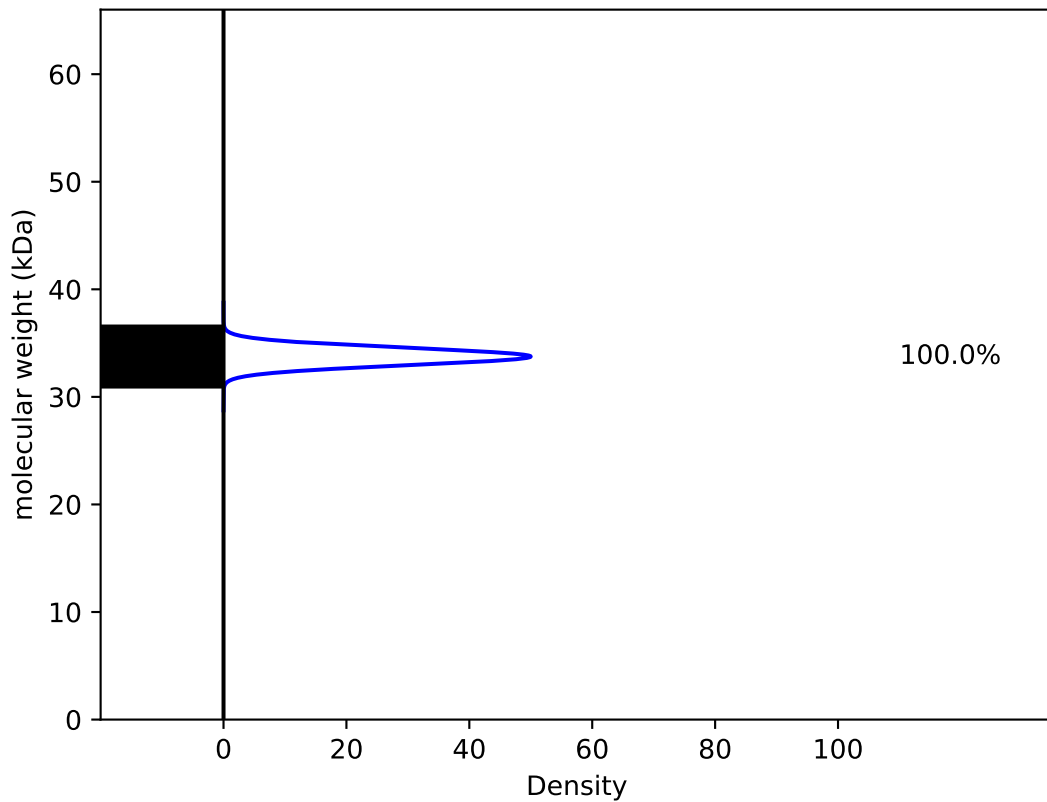

# Q15631





# Q15645



# Q15654



# Q15691

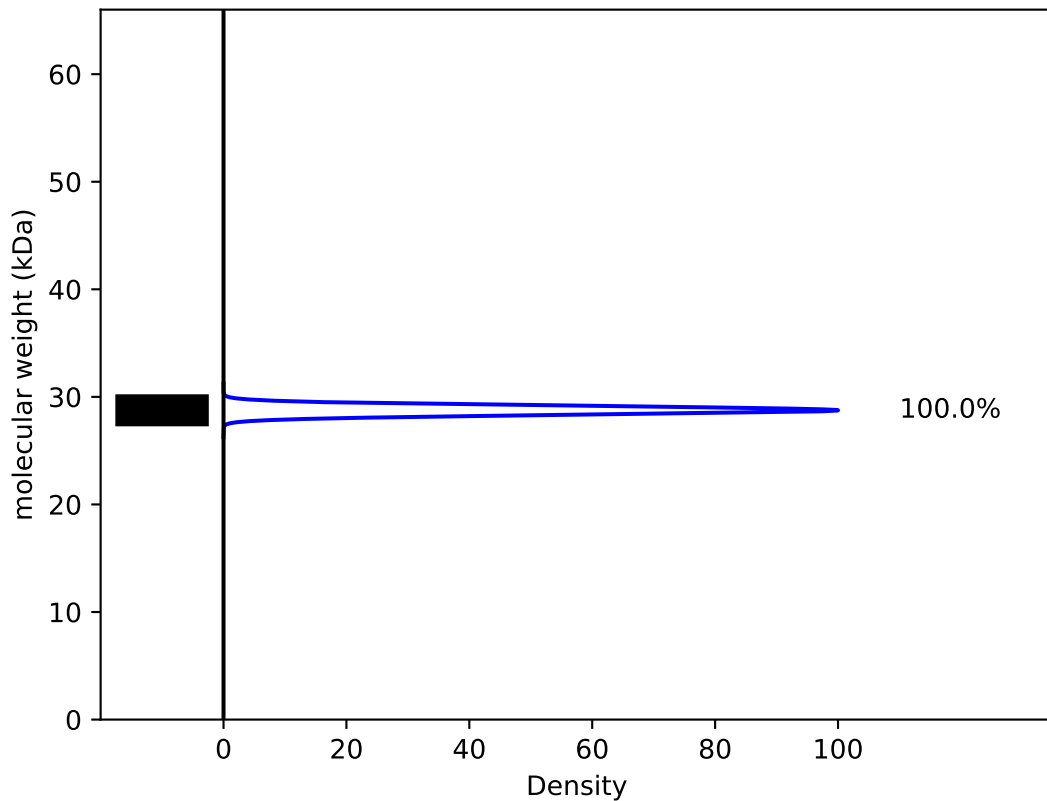

# Q15717



# Q15750



# Q15785



# Q15907



P62491





P57735



# Q16181



# Q6ZU15



# Q16186



# Q16222



# Q16342



# Q16352



Q16527





# Q16540



# Q16543



Q16576



# Q16630



Q16637



# Q16644



# Q16718



Q16762





# Q16763



# Q16774



# Q16836



# Q16864



# Q2TAA2



# Q3LXA3



# Q3MHD2



# Q3SXM5





# Q3ZAQ7



# Q3ZCM7

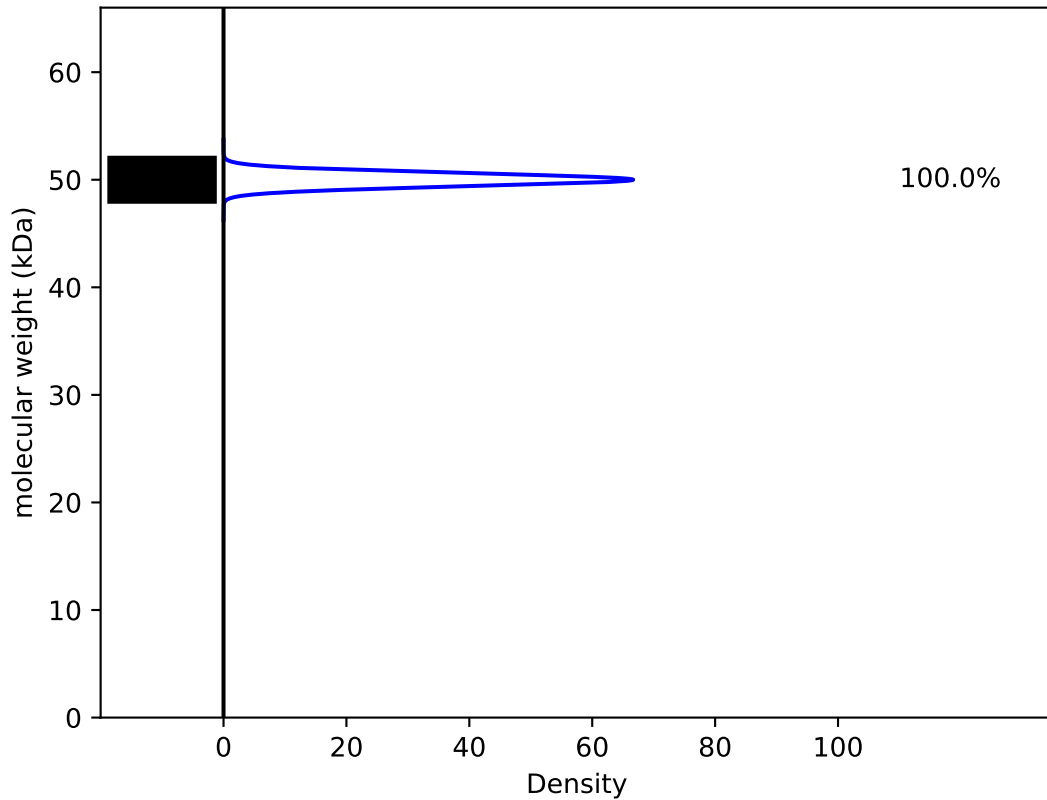

# Q3ZCQ8



# Q3ZCW2



# Q49AR2



# Q52LJ0

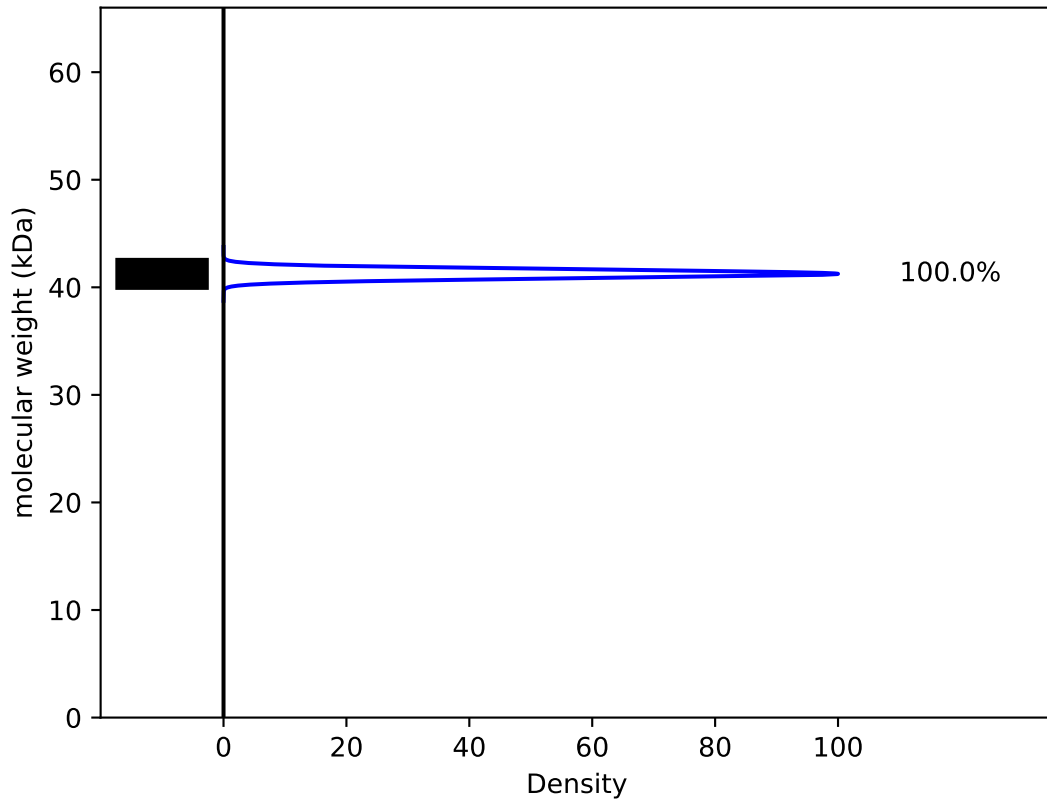

# Q53EL6



# Q53H12





# Q53H96



# Q562R1



# Q58FF8

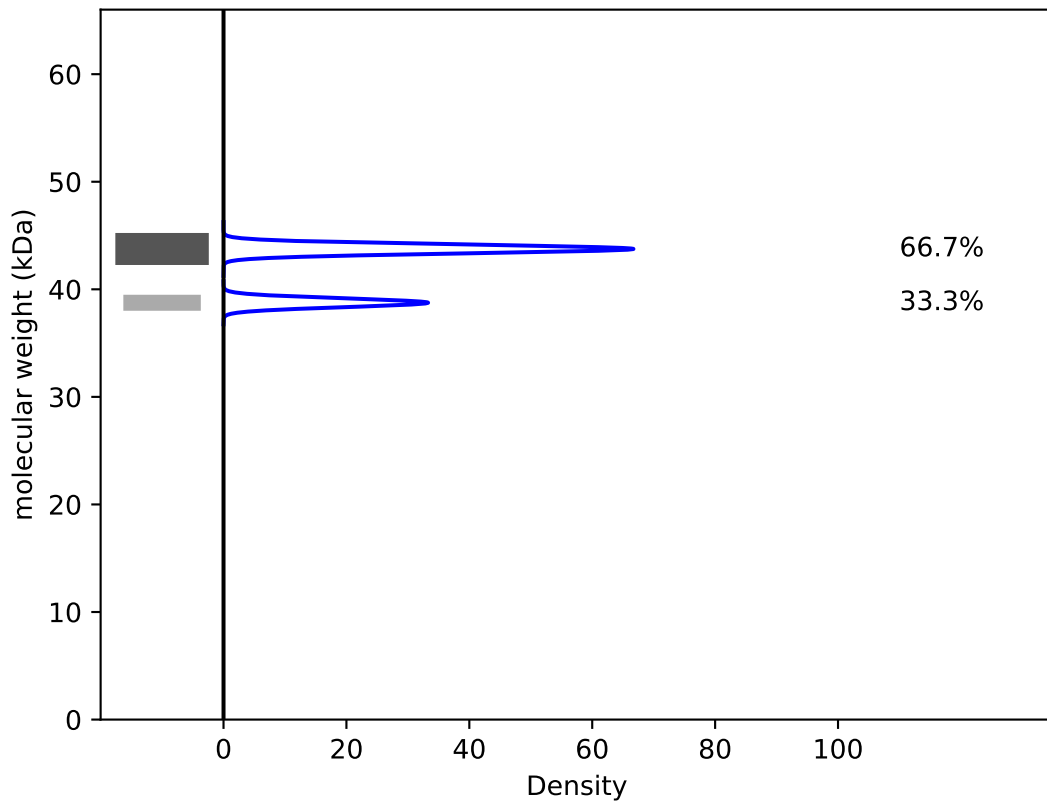

# Q5EBL4



# Q5HYI8



# Q5J8M3



# Q5RI15



# Q5RKV6





Q9Y6H1



# Q5T1J5

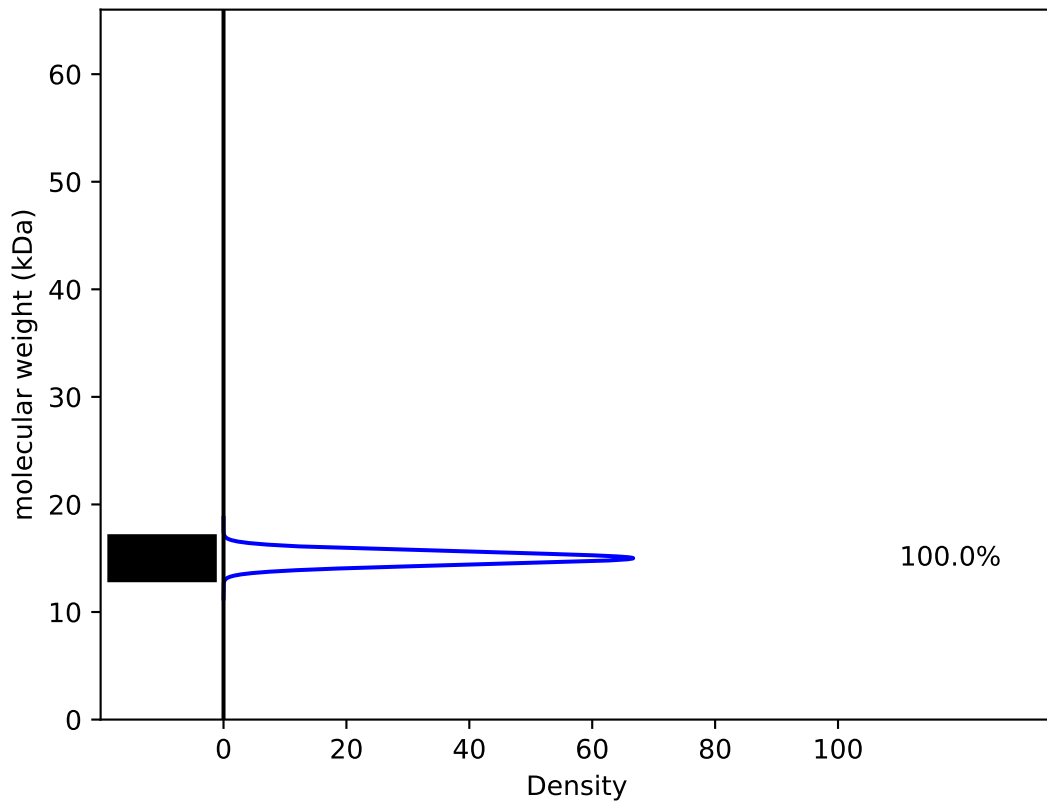

# Q5T440



# Q5TBB1



# Q5TDH0



# Q8WTU0

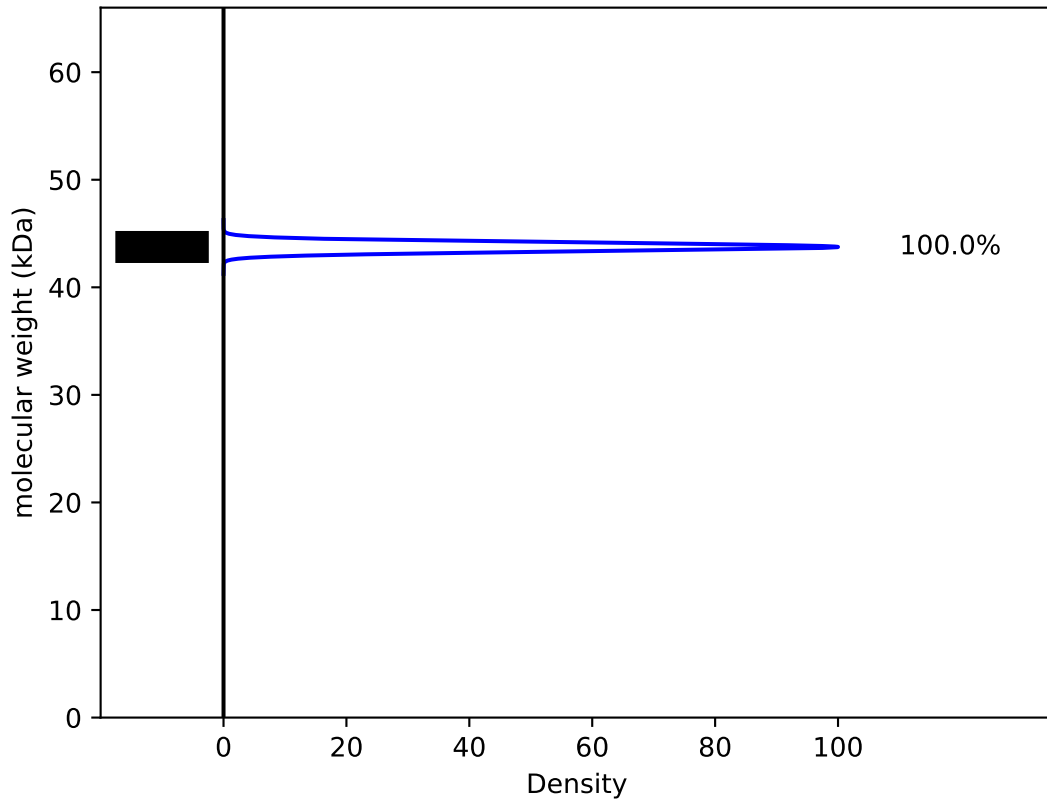

# Q5UCC4



# Q5VT66





# Q5VW32



# Q5VWZ2



# Q5W111



# Q68CQ7



# Q69YN2

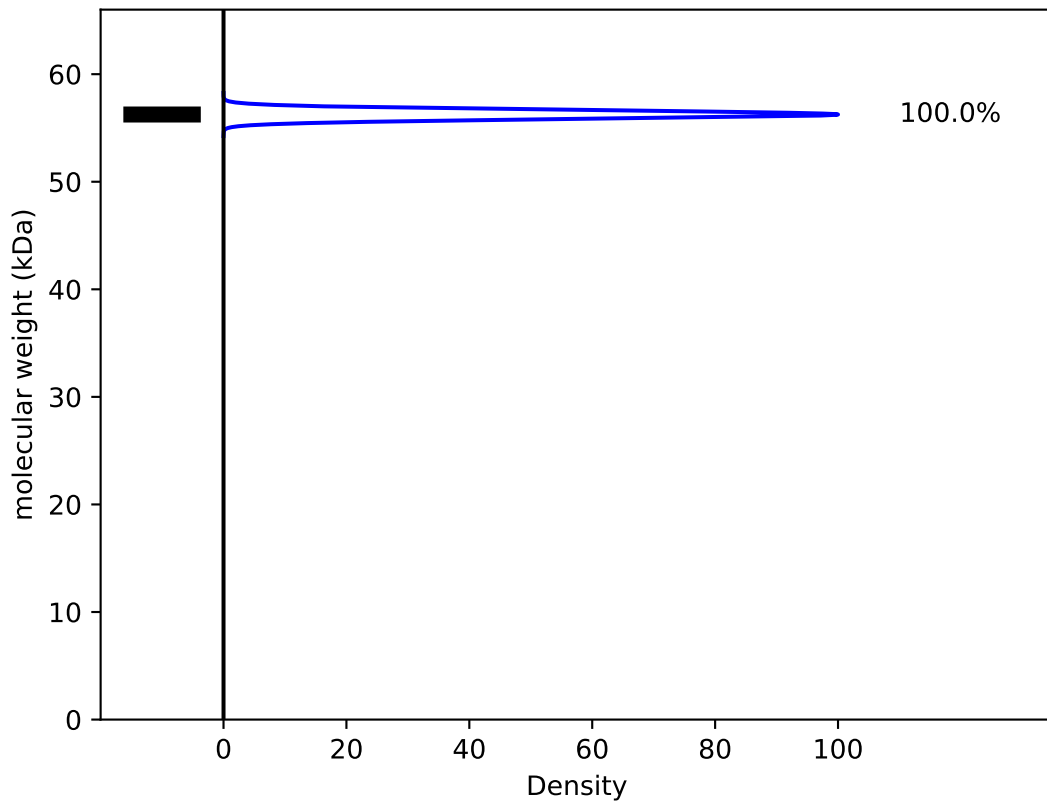

# Q6DKI1



# Q6DKJ4



# Q6GMV2





# Q6I9Y2



# Q6IAA8



# Q6IBS0



# Q6NW29

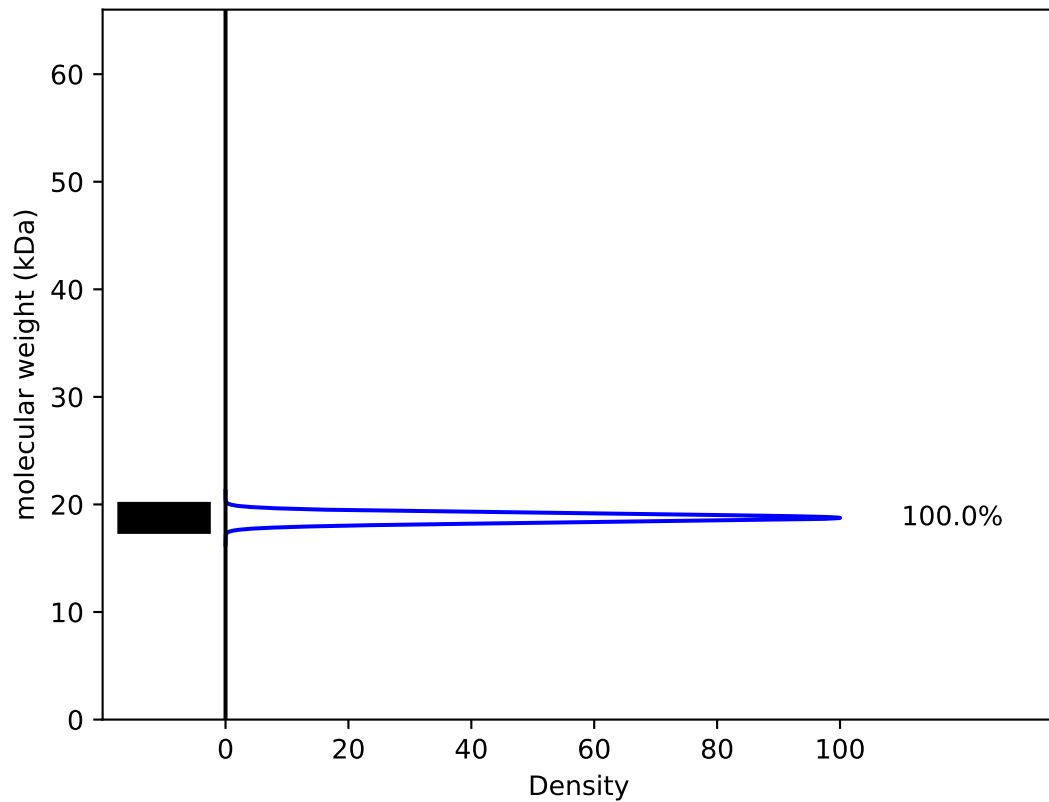

# Q6NYC1



# Q6P1L8



# Q6P4A7



# Q6P587





# Q6P9B6



# Q6PIU2



# Q6RFH5



# Q6UWP8

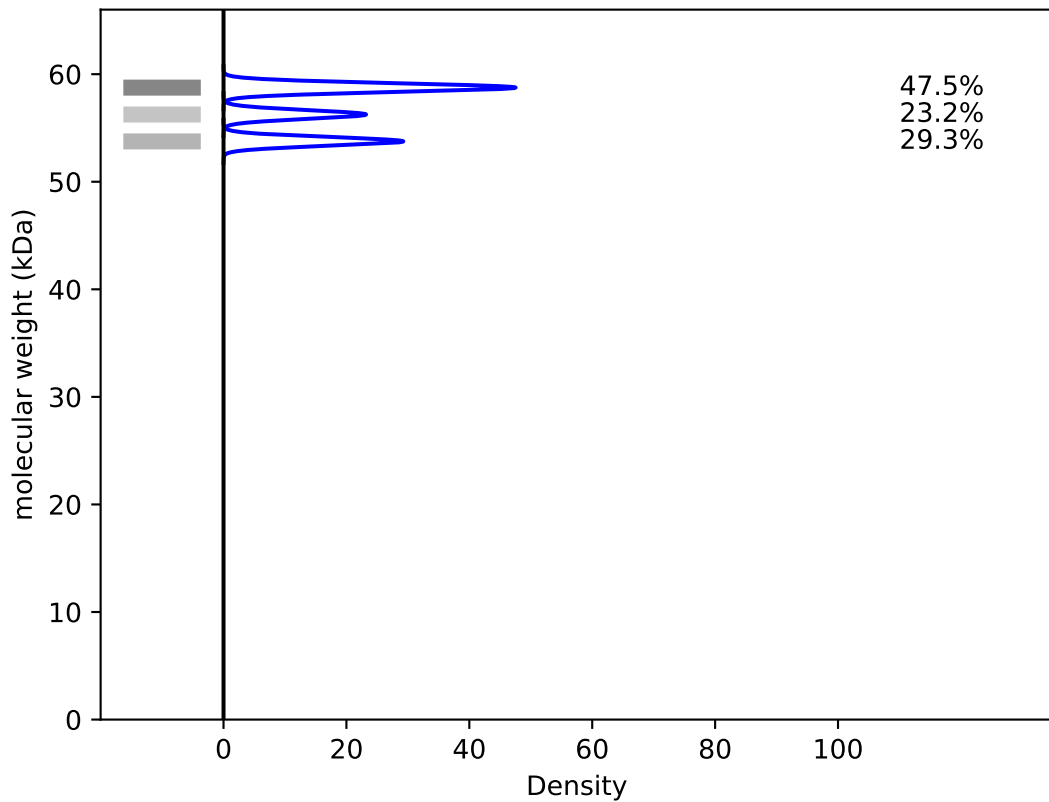

# Q6UX04



# Q6UXN9



# Q6YN16



# Q6ZN17





# Q70Z53



# Q71DI3



# Q71U36



# Q6PEY2



# Q7L1Q6



# Q7L2H7



# Q7L5N1



# Q7L5Y9





# Q7Z3B4



# Q7Z4H8



Q7Z4W1



Q7Z7E8



# Q7Z7H5



# Q86TX2



# Q86V81



# Q86VN1





# Q86W42



# Q86Y82



# Q86YB8



# Q8IUUF8



# Q81UI8



# Q8IVD9



# Q8IVS2



# Q8IXM3





# Q8IYS1



# Q8N0U8



# Q8N183



# Q8N335



# Q8N4P3



# Q8N4V1



# Q8N5K1



# Q8N5M4





# Q8N5M9



# Q8N684



# Q8N6T3



# Q8N9N8

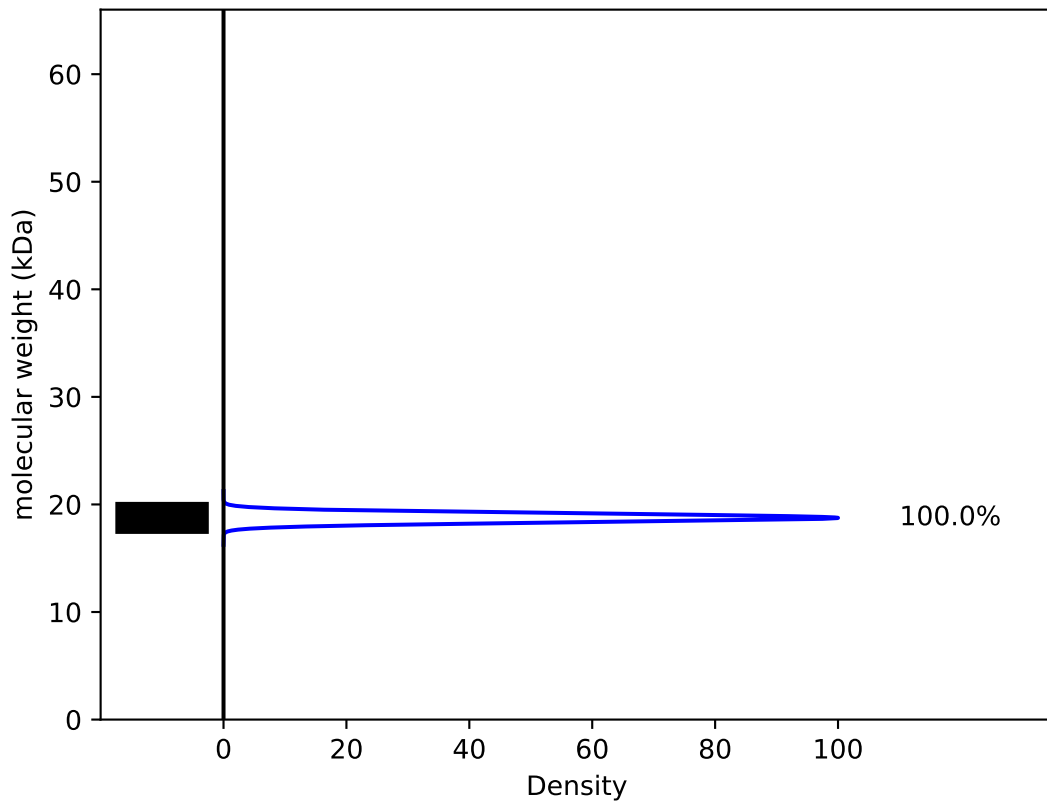

# Q8NAV1



# Q8NB37



# Q8NBJ7



# Q8NBM8





# Q8NBN7



# Q8NBQ5



# Q8NBS9



# Q8NBT2



# Q8NBU5



# Q8NC51

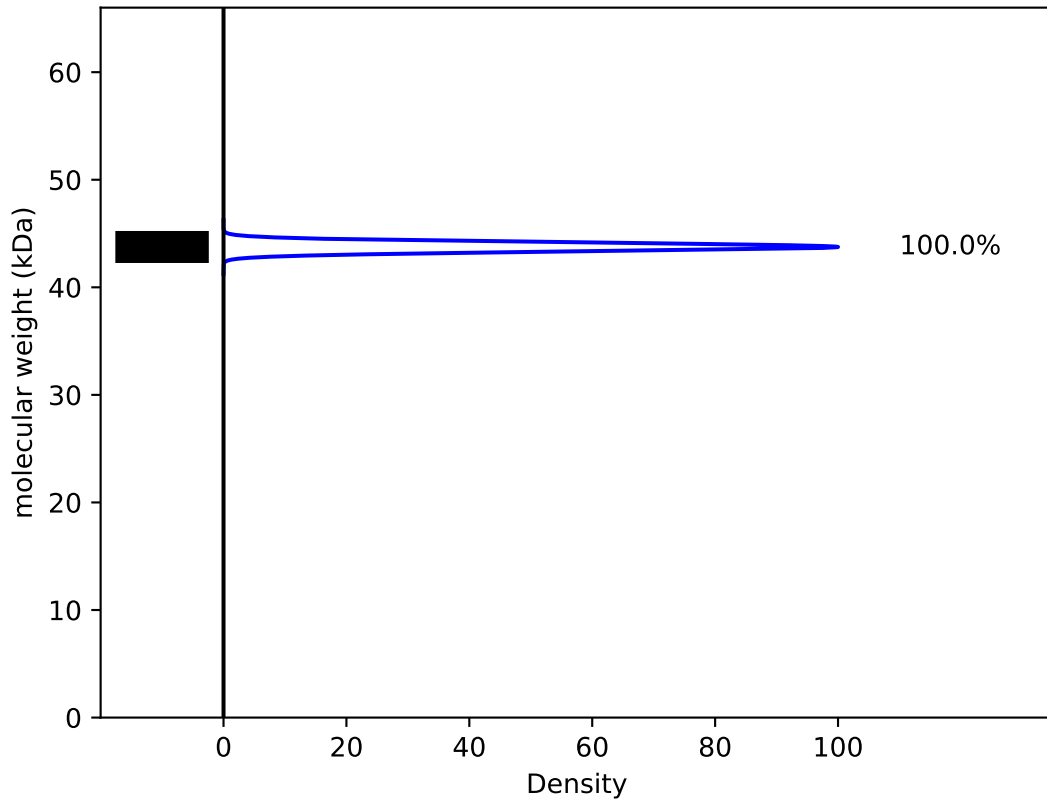

# Q8NCA5



# Q8ND56





# Q8NFH3



# Q8NFH4



# Q8NFH5



# Q8NFI4



# Q8NFW8



# Q8TAE8



# Q8TB03



# Q8TBX8





# Q8TCC3



# Q8TCF1



P24298



# Q8TDP1



# Q8TEA8



# Q8TED0



# Q8TED1



# Q8WTS6





# Q8WUA2



# Q8WUD1



# Q8WUD4



# Q8WUH6



# Q8WUK0



# Q8WUX2



# Q8WVD3



# Q8WVM0





Q8WVY7

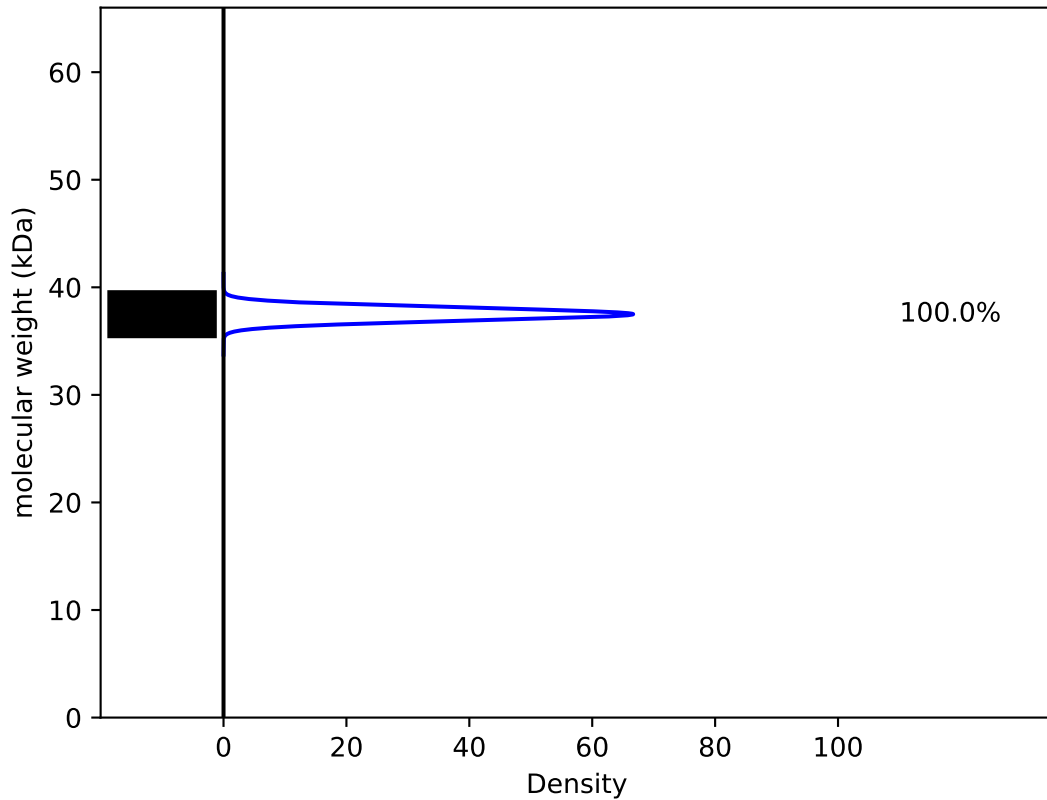

# Q8WW12

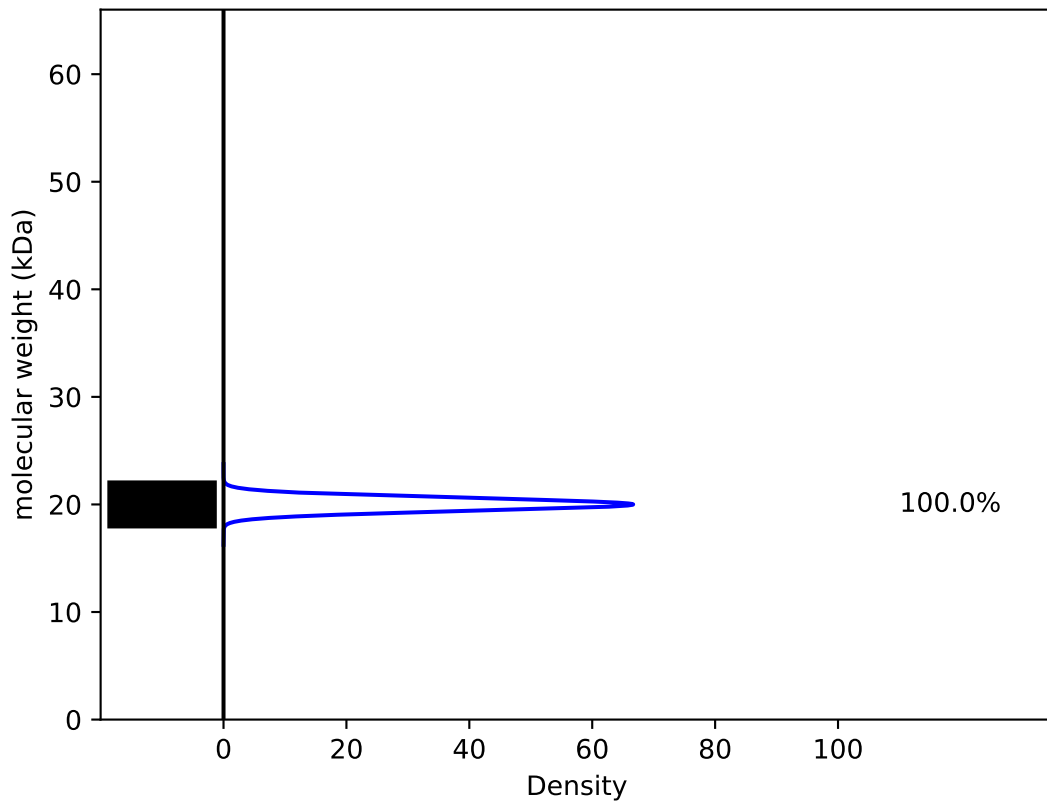

# Q8WW59



# Q8WXF1



# Q8WXX5



# Q8WZA0



# Q92520



Q92530





Q92572



# Q92575

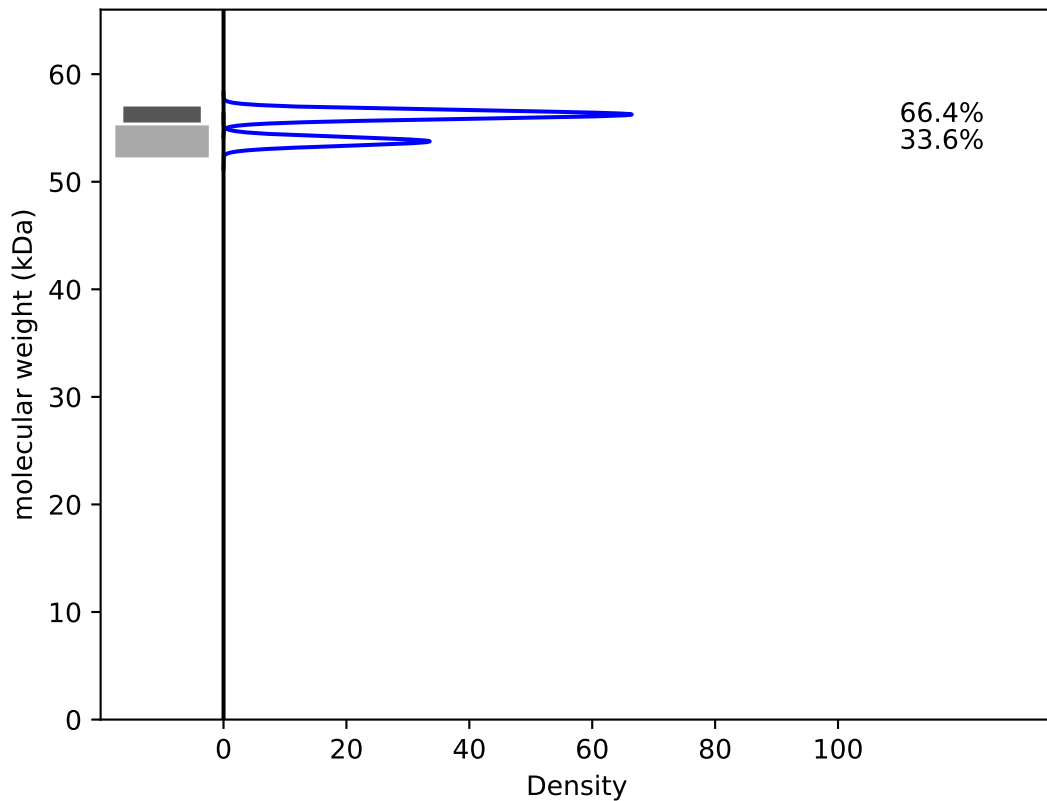

# Q92597



Q92643



Q92688



Q92734



Q92769



Q92820





Q92879



# Q92890



# Q92905



Q92917



# Q92930



Q92979



# Q969G3



# Q969J3

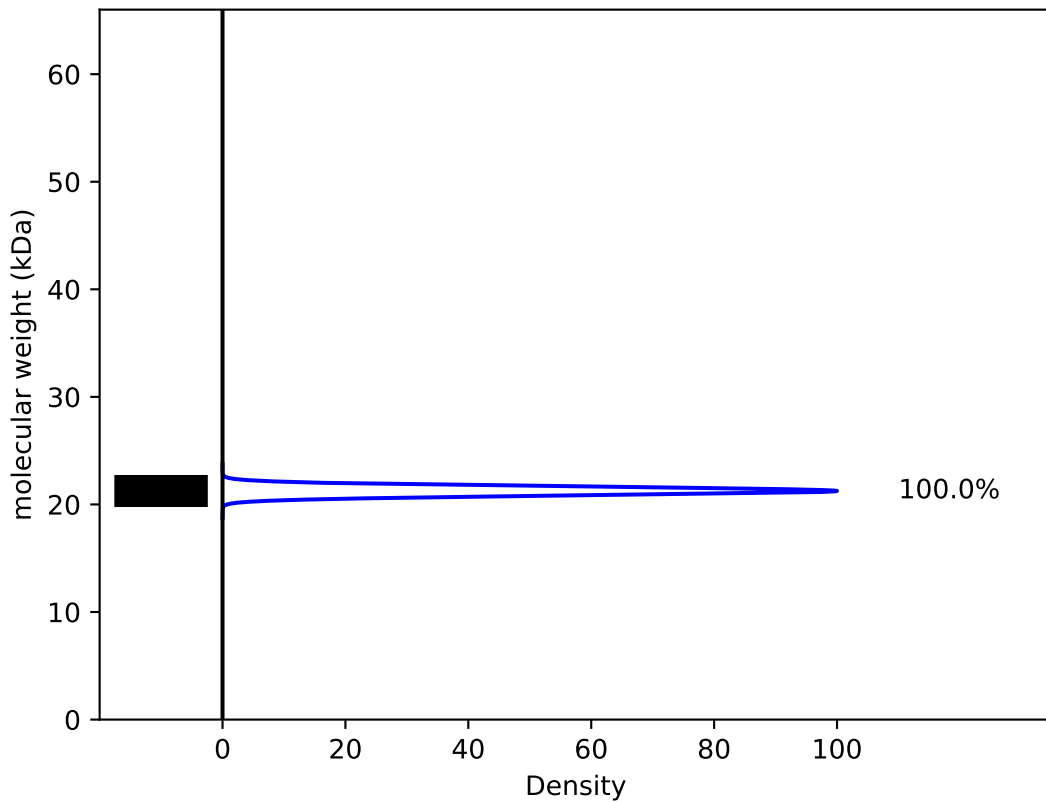



# Q969Q0



# P83881



# Q969Q5



# Q969T9



# Q969U7

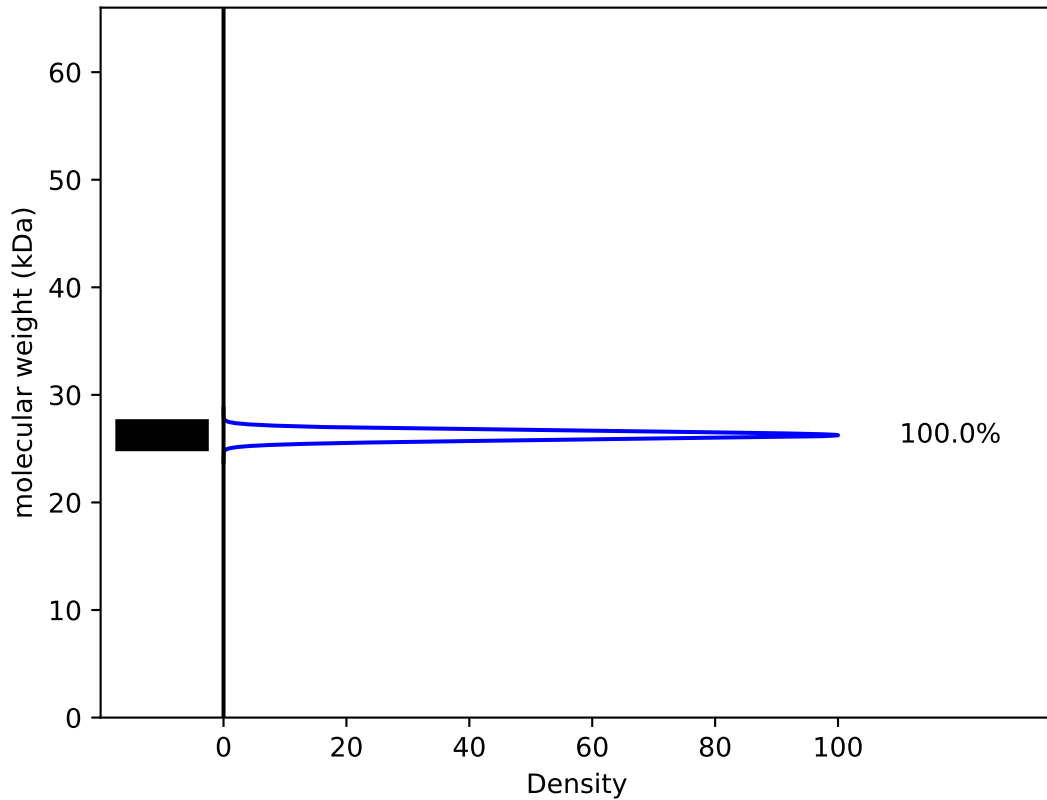

# Q96A26



# Q96A33



# Q96A49





# Q96A72



# Q96AG4



# Q96AT9



# Q2QD12



# Q96AZ6



# Q96B26



# Q96BM9



# Q96BW5





# Q96C19

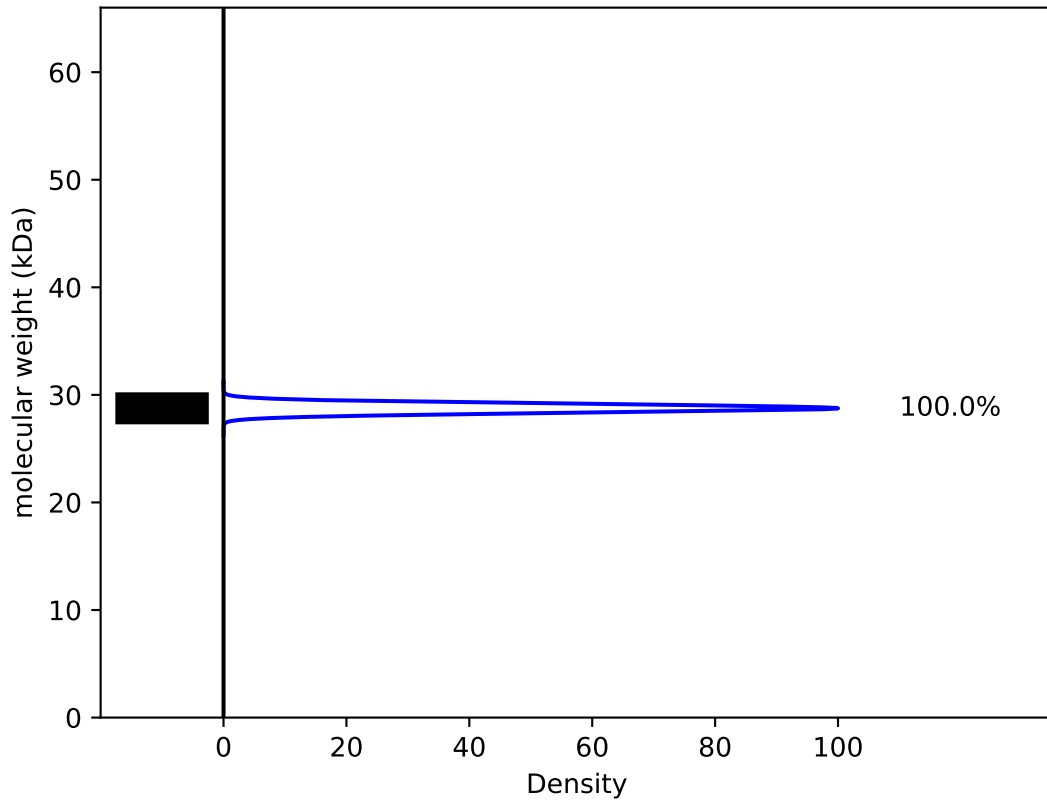

# Q96C23

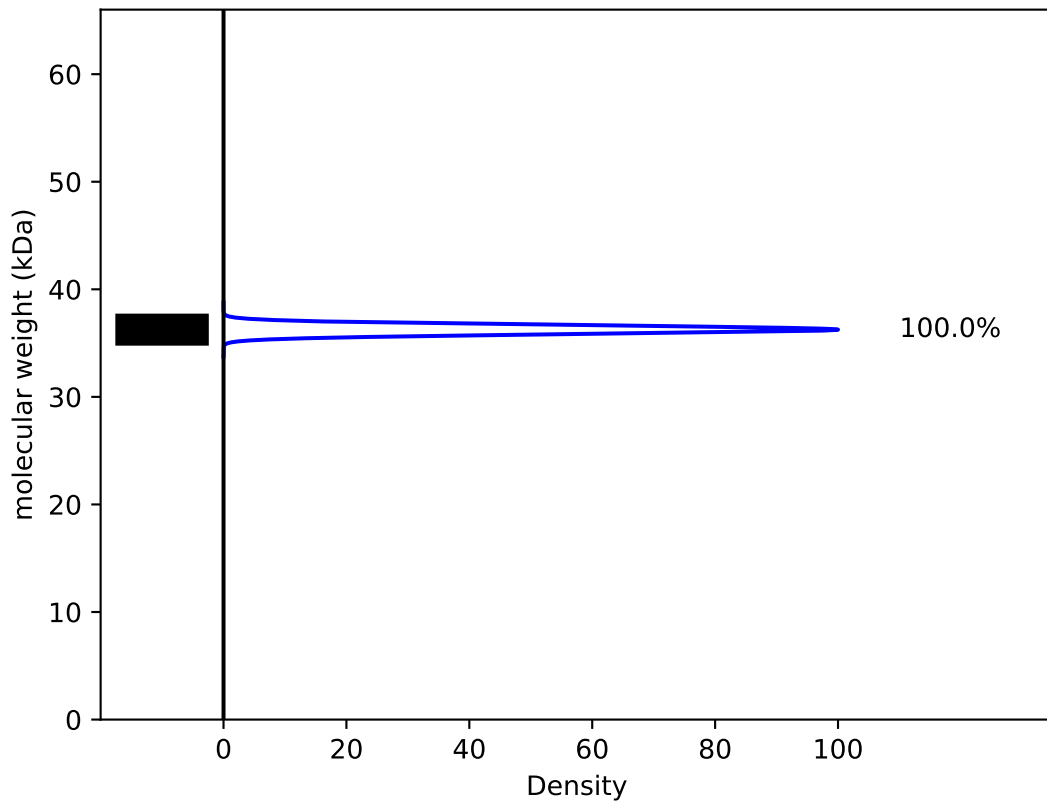

# Q96C36



# Q96C86



# Q96CN7



# Q96CS3



# Q96CT7



# Q96CW1





# Q96CX2



# Q96D46



# Q96DA6



# Q96DE0



# Q96DG6



# Q96DI7



# Q96EE3



# Q96EK6





# Q96EL3



# Q96EP5

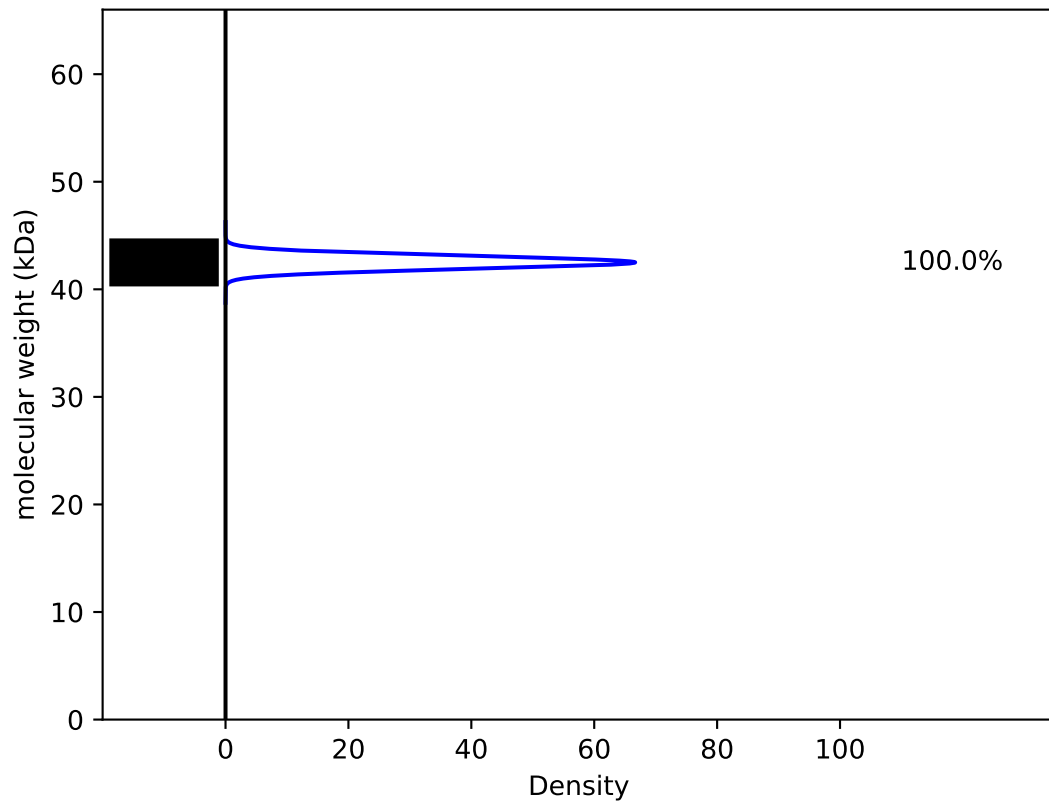

# Q96ES7



# Q96EY8



# Q96F86

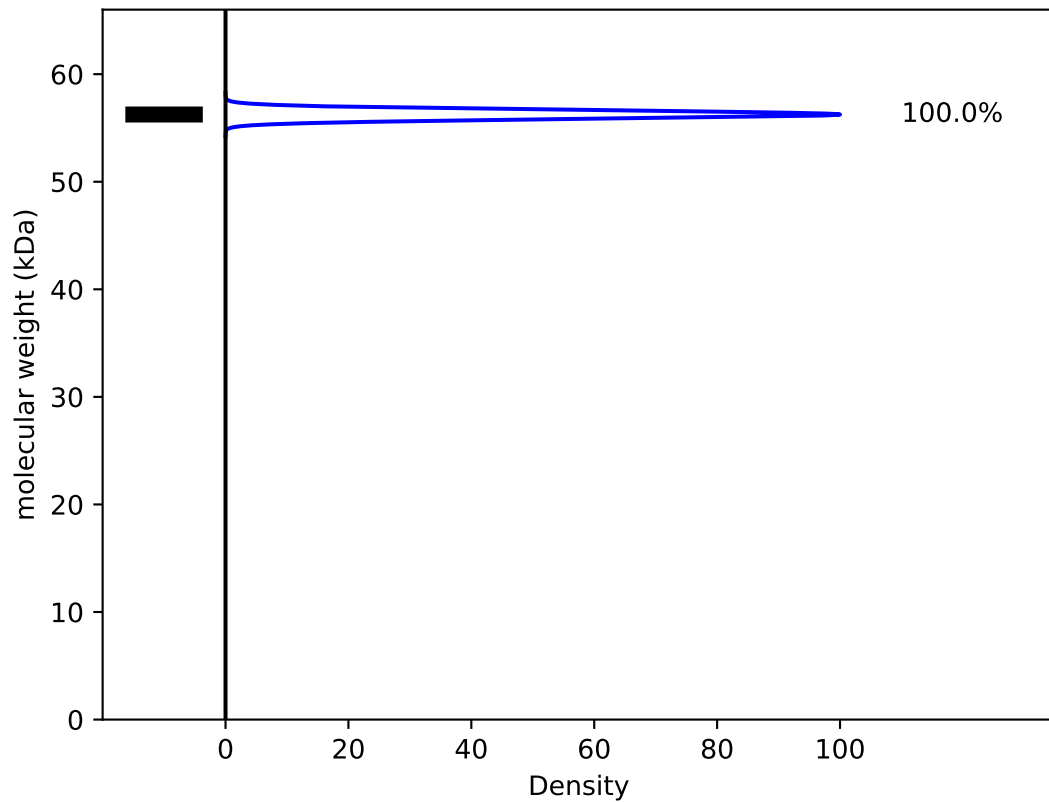

# Q96FW1

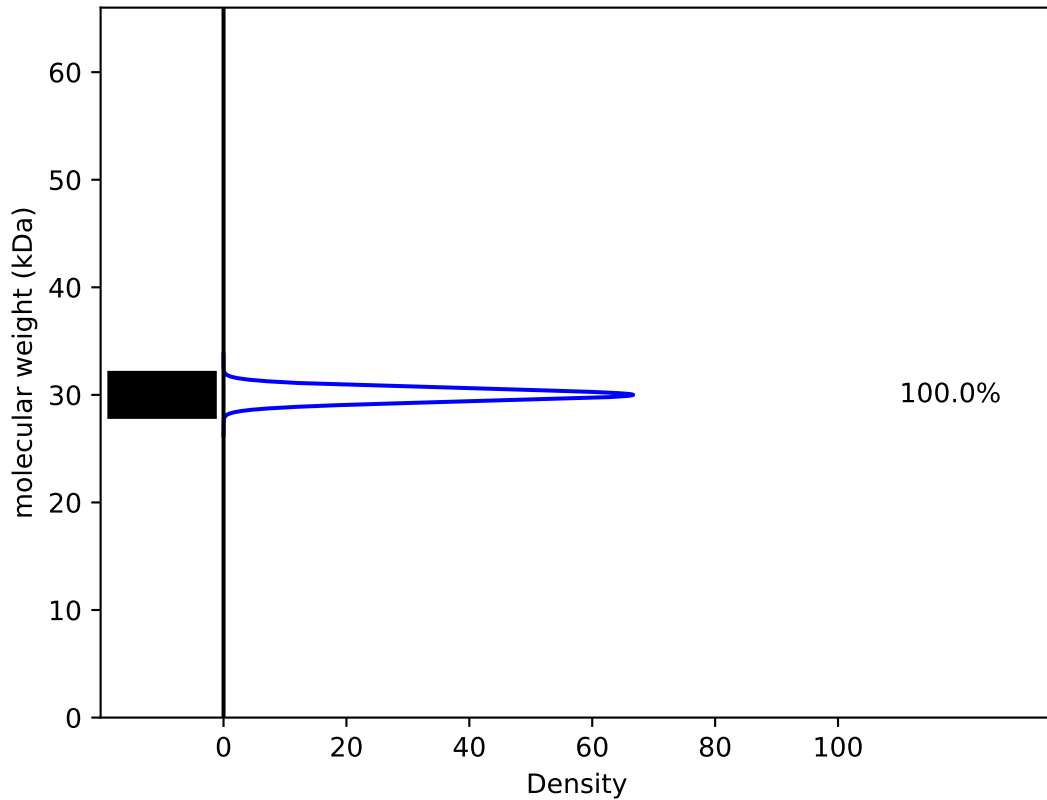

# Q96FZ2



# Q96G21





# Q9H871

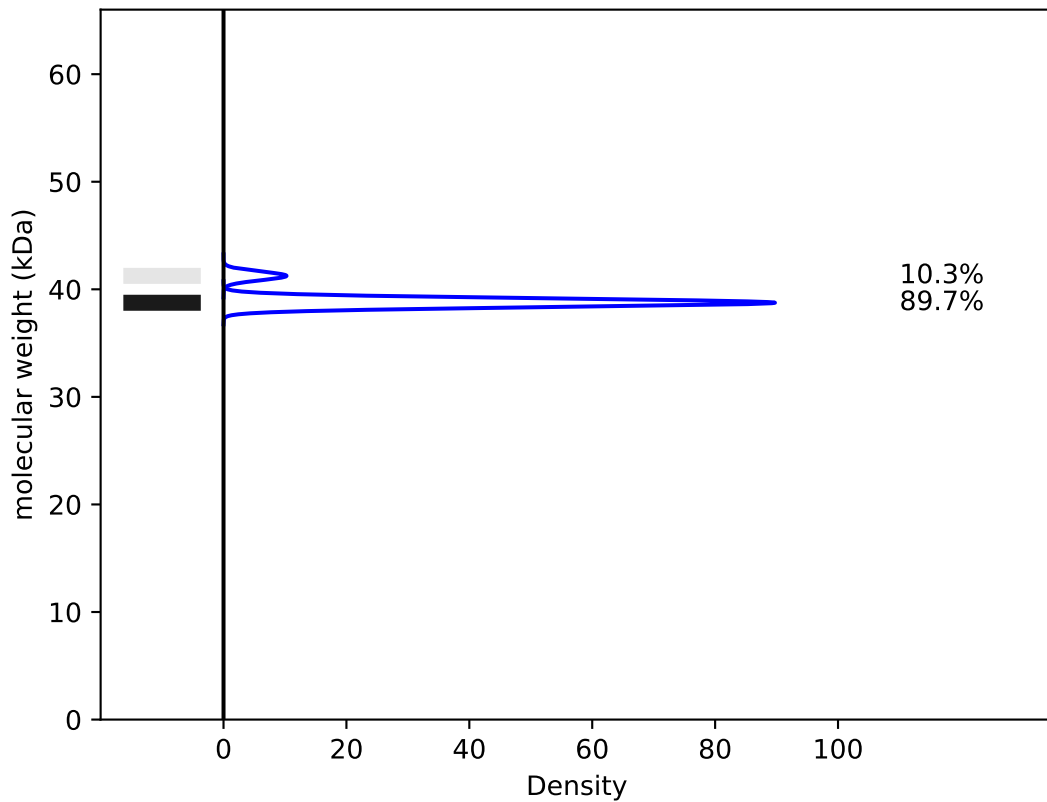

# Q96G75

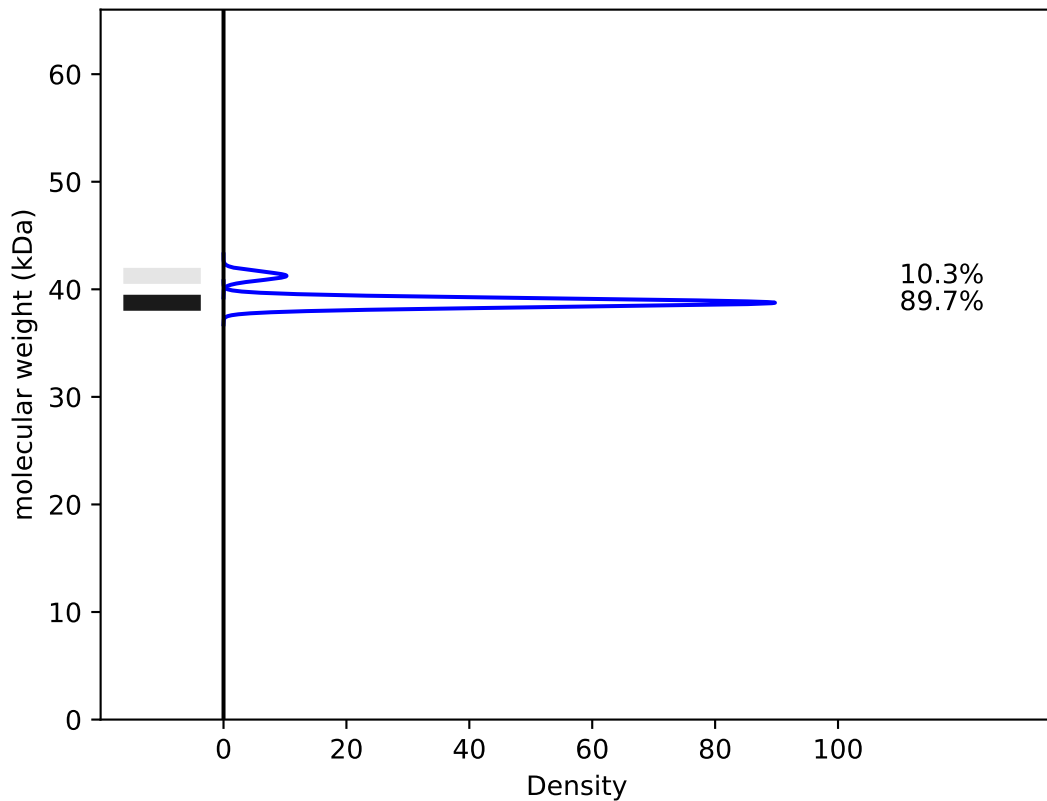

# Q96GD0



# Q96GD4



# Q9UQB9



# Q96H79



# Q96HE7

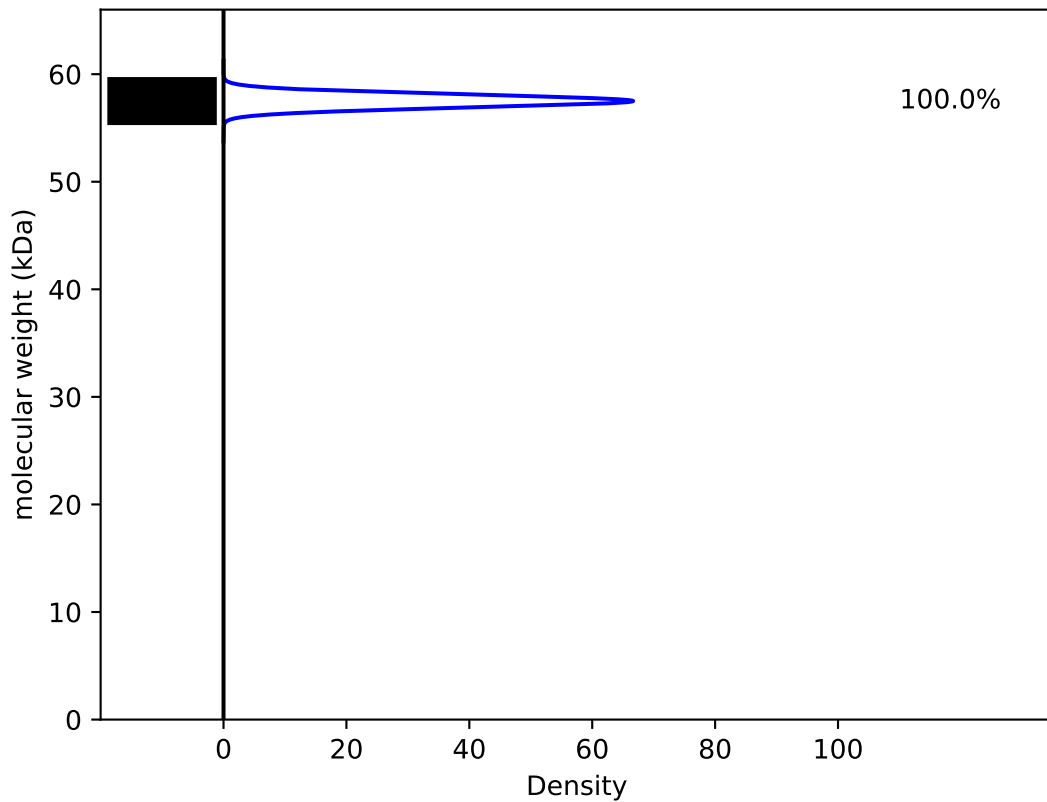

# Q96HS1

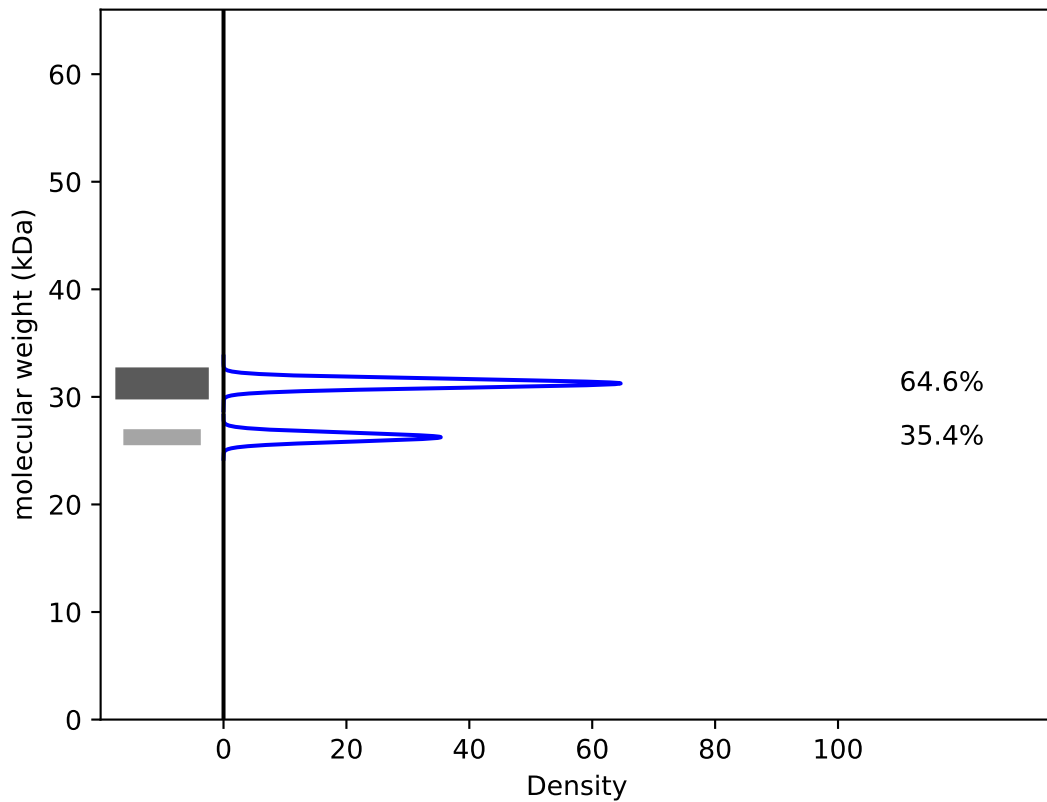



# Q96HY6



# Q96I24



# Q96I25



# Q96IU4



# Q96IZ0



Q96J01



# Q96JB5



# Q96K17





# Q96KP4



# Q96M27



# Q96MG7

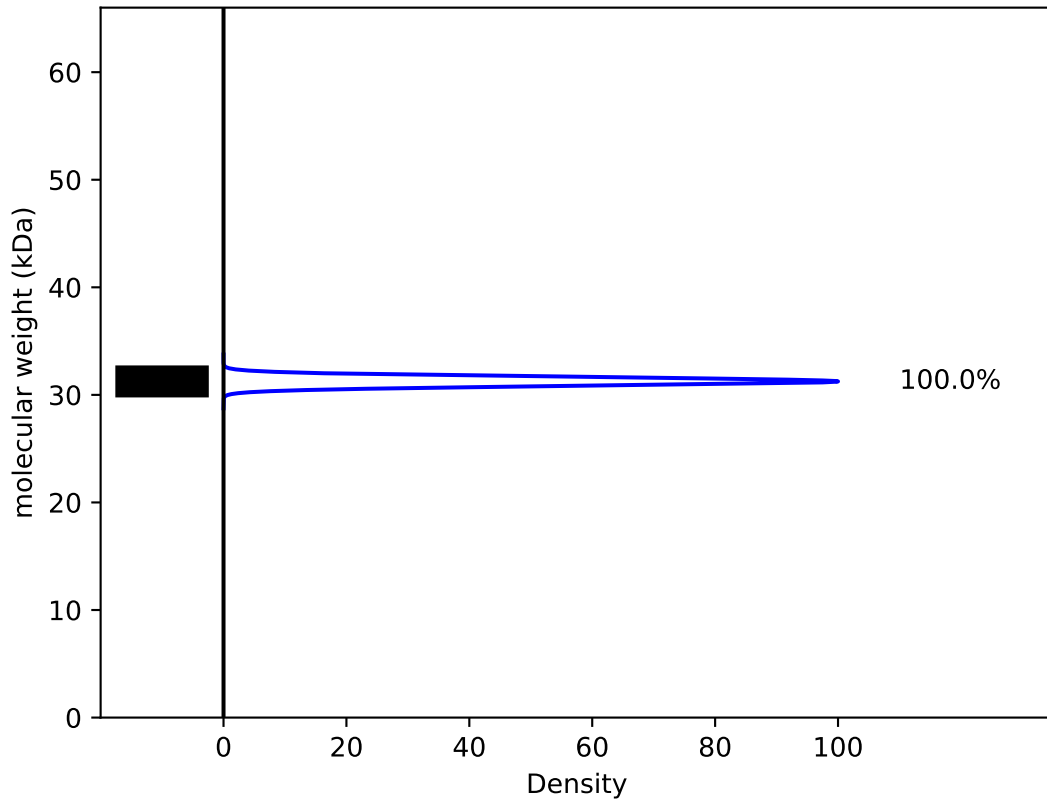

# Q96MW1



# Q96MX6



# Q96P16



# Q96PU8



# Q96QR8





# Q96S44



# Q96SY0



Q99426



Q99436



Q99442



Q99471



Q99496



Q99497





Q99536



Q99541



Q99598



Q99611



Q99614



# Q99615



Q99623



Q99627





Q99653



Q99714



Q99720



Q99729



# Q99733

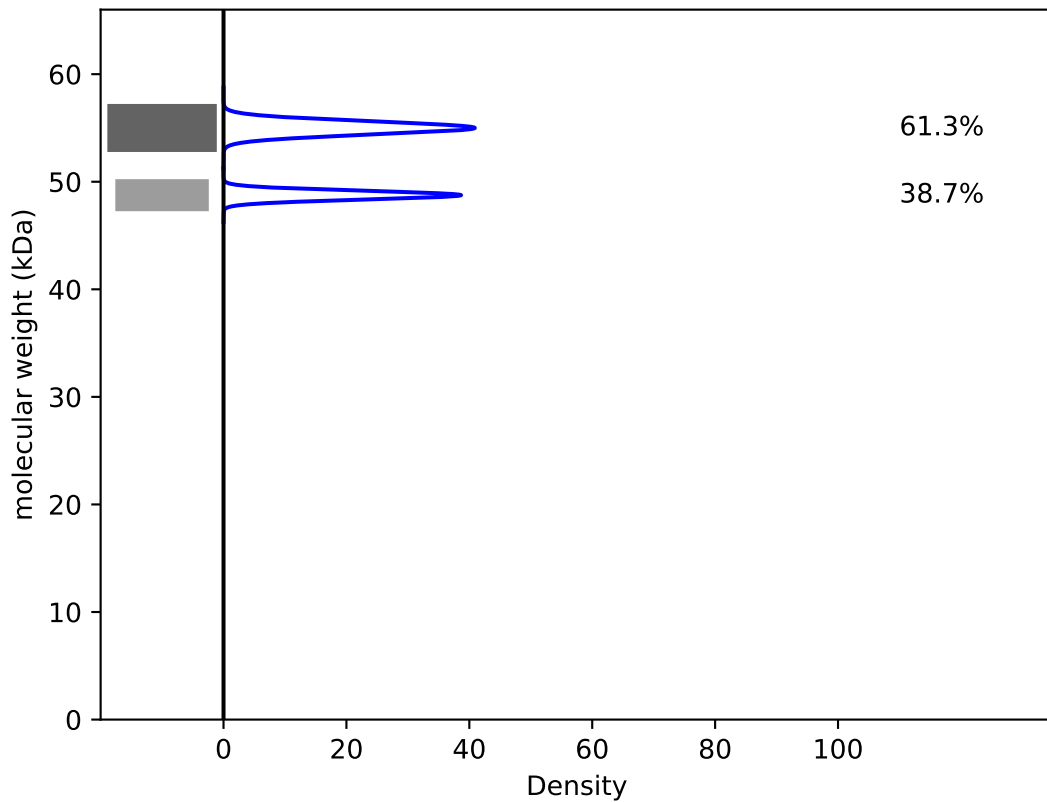

Q99747



# Q99816



Q99829





Q99873



Q99942



Q99956



Q99961

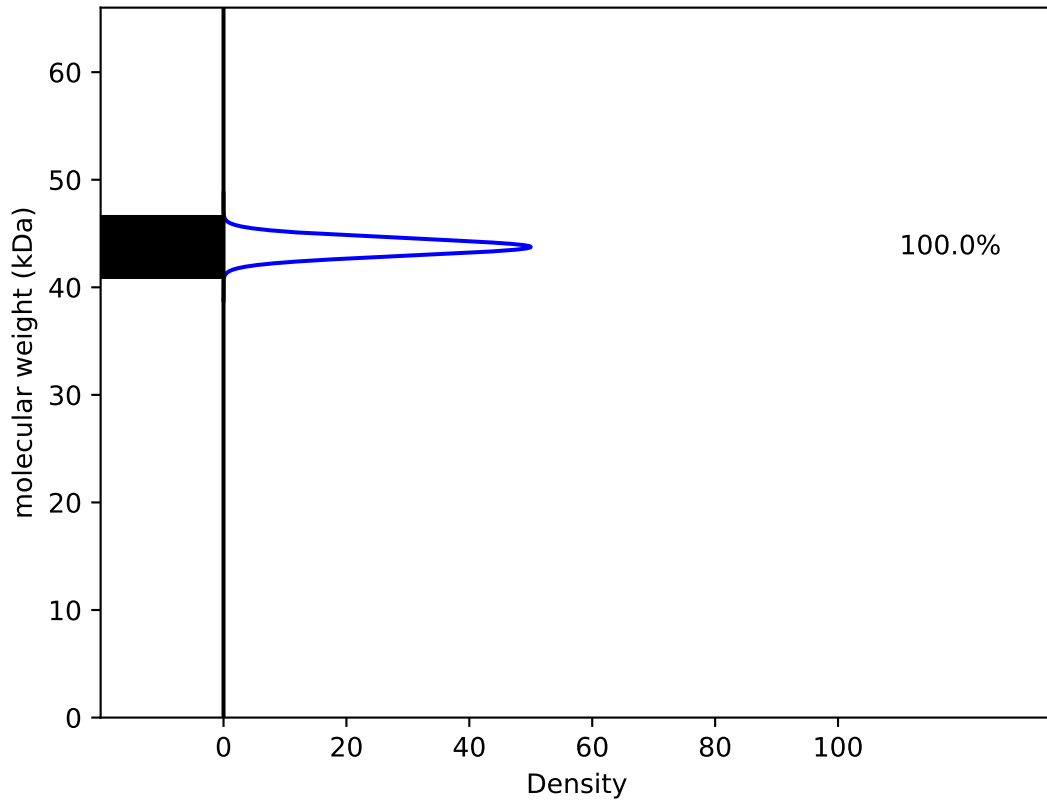

Q99962



Q99986

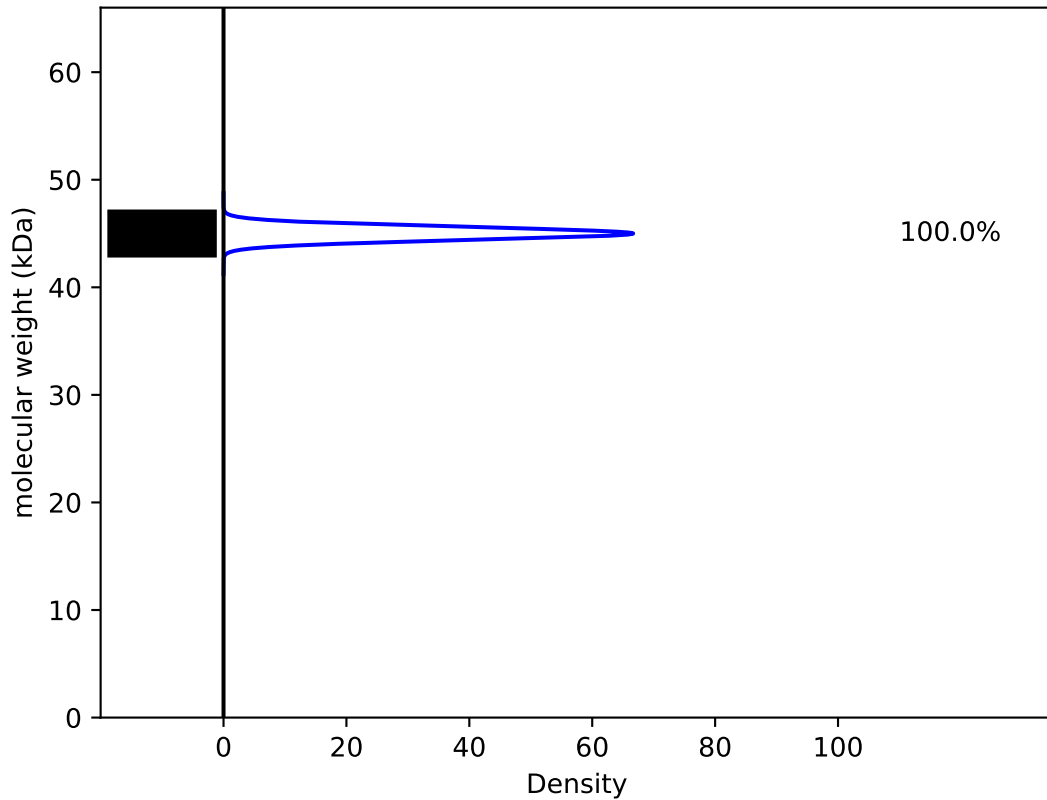

# Q9BPX5



# Q9BQ61





# Q9BQ67



# Q9BQ75



# Q9BQA1



# Q9BQC6



# Q9BQE3



# Q9BQE5



# Q9BR76



# Q9BRA2





# Q9BRG1



# Q9BRJ6



# Q9BRJ7



# Q9BRP1



# Q9BRP4



# Q9BRQ6



# Q9BRT9



# Q9BRX2





# Q9BRX5



# Q9BRX8



# Q9BS26



# Q9BSD7



# Q9BSF4



# Q9BSH5



# Q9BSV6



# Q9BT73





# Q9BTE1



# Q9BTE7



# Q9BTT0



# Q9BTY7



# Q9BTZ2



# Q6PKH6



# P0CG22



# Q9BU89





# Q9BUF5



# Q9BUH6



# Q9BUI4

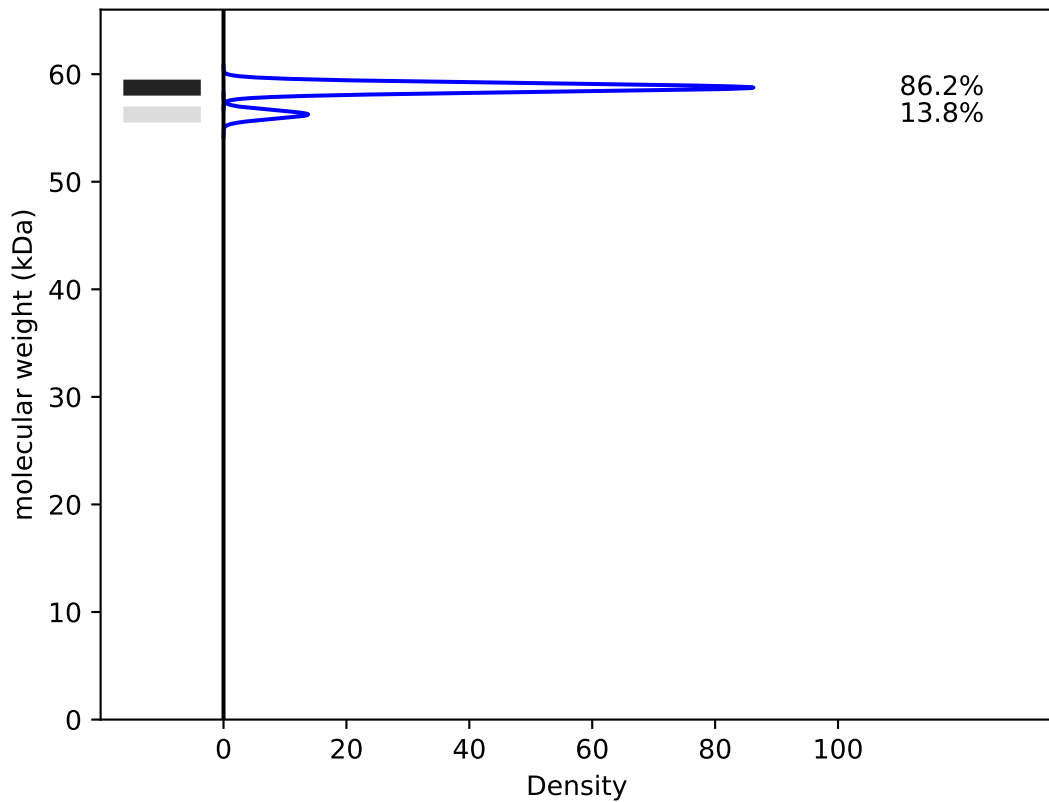

# Q9BUL8



# Q9BUT1



# Q9BV19



# Q9BV20



# Q9BV86





# Q9BVA1



# Q9BVC4



# Q9BVI4



# Q9BVK6



# Q9BVM2



# Q9BVS5



# Q9BW83



# Q9BW91





# Q9BWF3



# Q9BWH2



# Q9BXS5

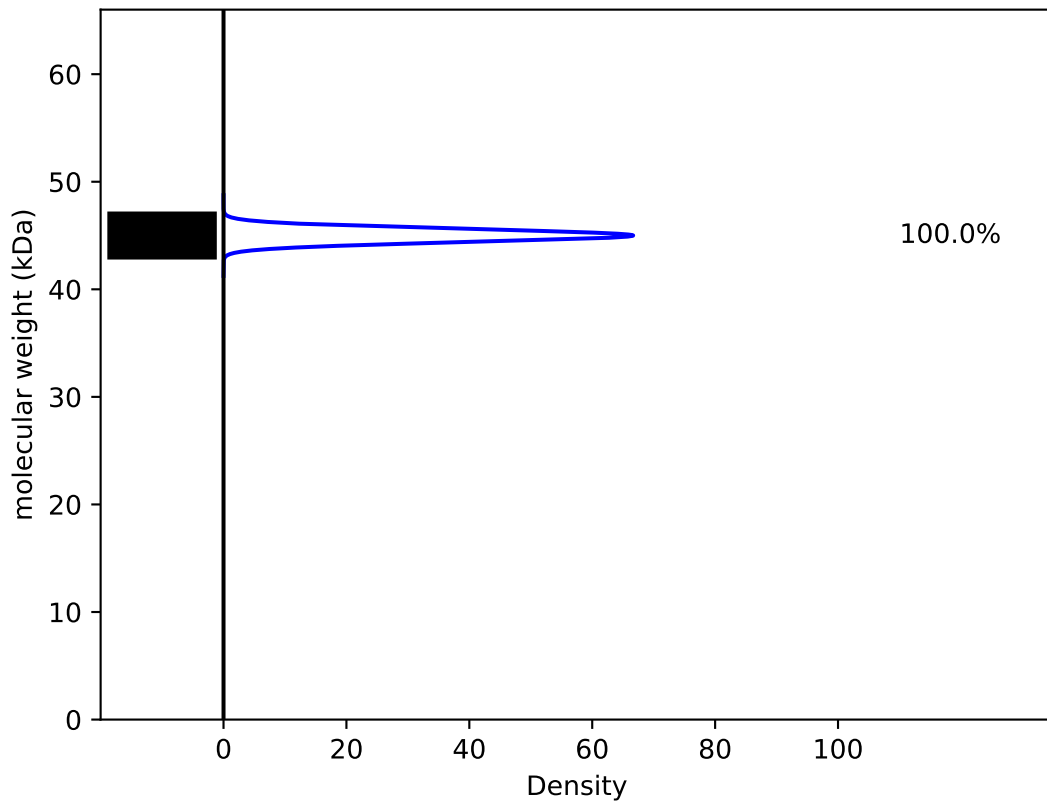

Q9Y6Q5



# Q9BXY0



# Q9BY32



# Q9BY42



# Q9BYC9





# Q9BYD1



# Q9BYD3



# Q9BYG3



# Q9BYN8



# Q9BZK7



# Q9BZX2



# Q9BZZ5



# Q9C0B1





# Q9GZL7



# Q9GZM8



# Q9NXR1



# Q9GZN8



# Q9GZS3



# Q9GZT3



# Q9GZT4



# Q9GZZ1





# Q9GZZ9



# Q9H000



# Q9H061



# Q9H074



Q9H0C8

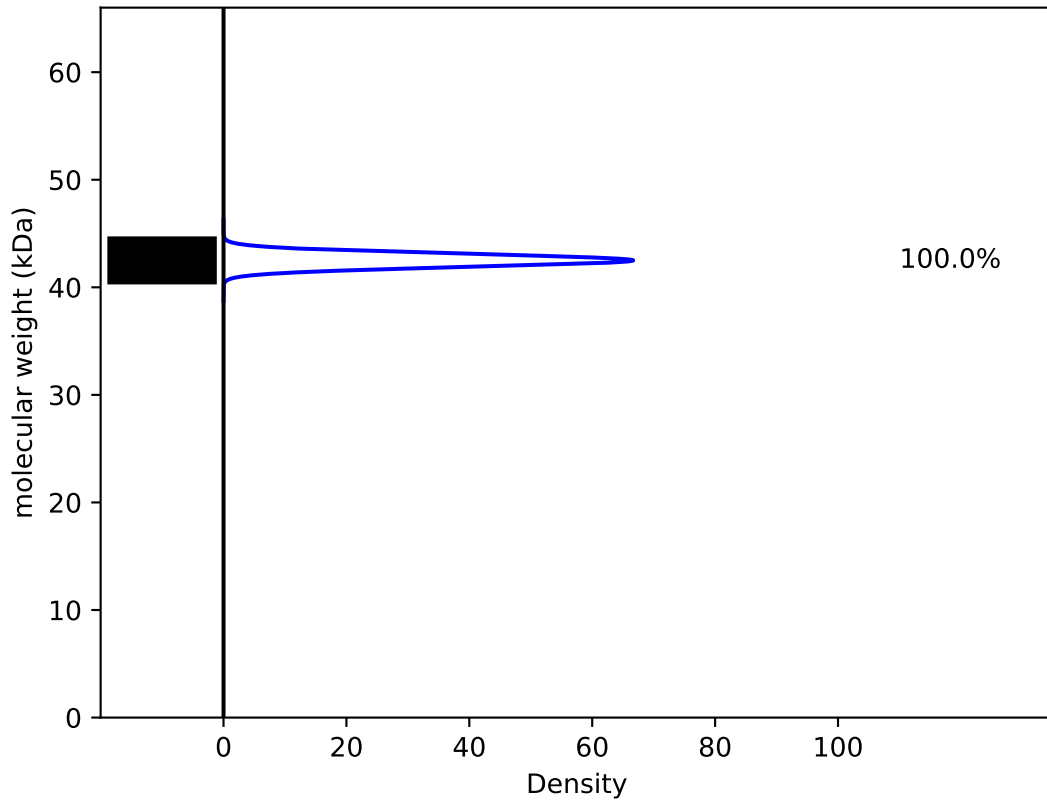

Q9H0E2



# Q9H0R4



# Q9H0S4





# Q9H0U4



# Q92928



# Q9H0U6



# Q9H0W9



# Q9H1E3

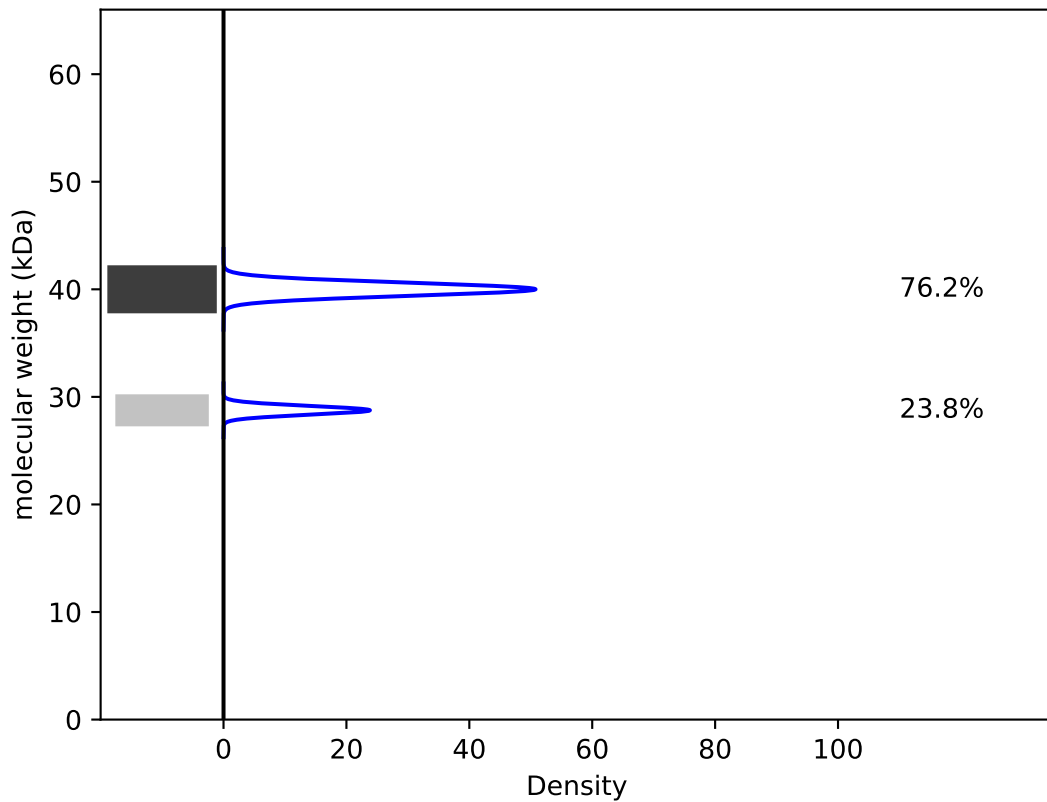

# Q9H223



# Q9H3K6



# Q9H3N1





# Q9H3R5



# Q9H444



# Q9H488



# Q9H4A6



# Q9H4M9



# Q9NZN3



# Q9NZN4



# Q9H6Y2





# Q9H773



# Q9H7B2



# Q9H7C9



# Q9H832



# Q9H8H3



# Q9H8S9



Q9H8Y8



# Q9H974





# Q9H9B4

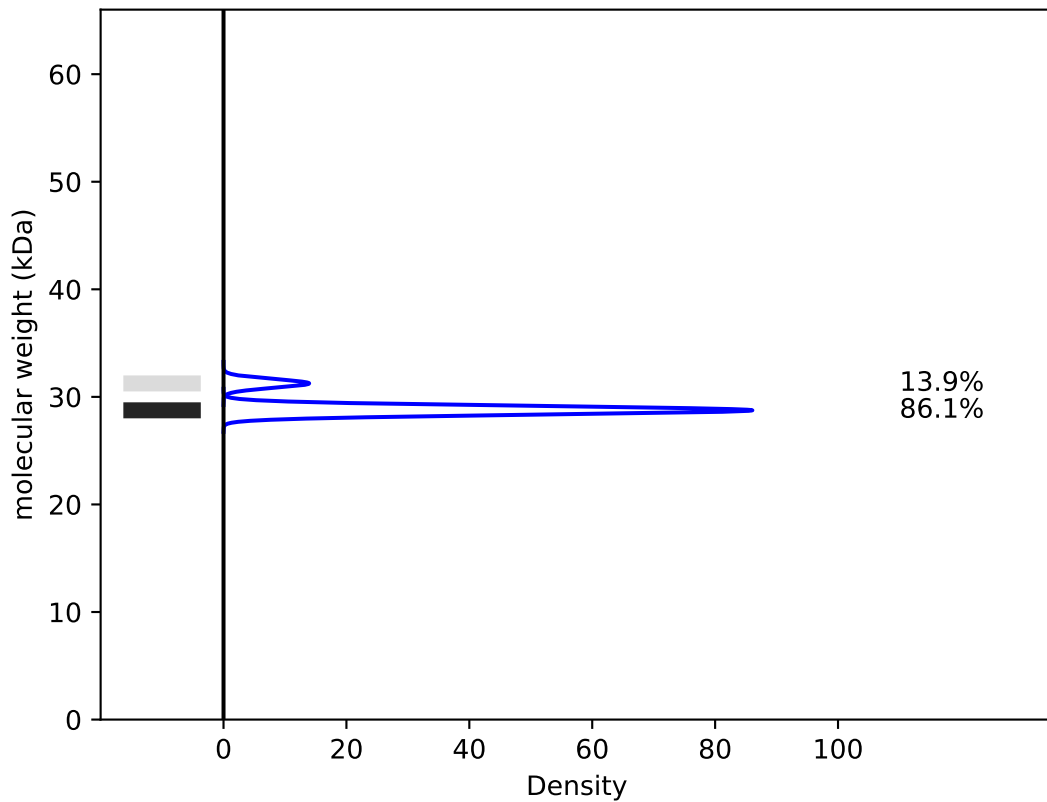

# Q9H9J2

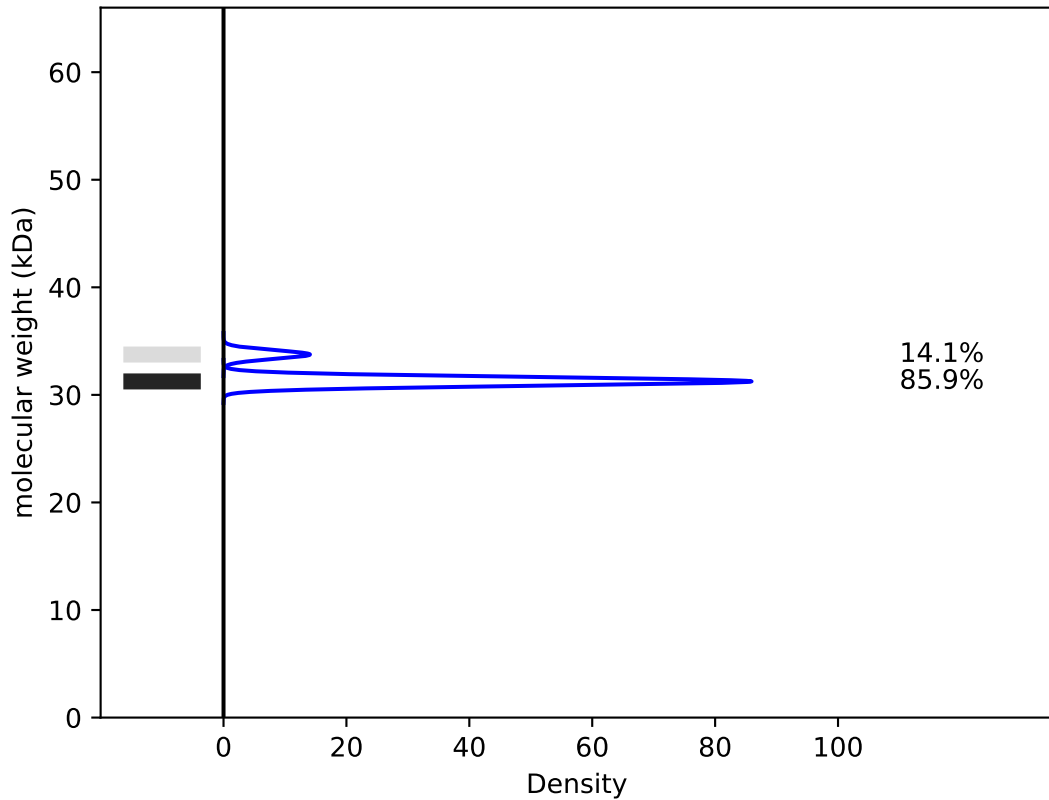

# Q9H9Q2



# Q9HAB8



# Q9HAV7



# Q9HB07



# Q9HB71



# Q9HBH5





# Q9HBM1



# Q9HC38



# Q9HCN4



# Q9HCN8



# Q9HCU5



# Q9HDC9



# Q9NP72



# Q9NP79





# Q9NP92



# Q9NPD3



# Q9NPD8



# Q9NPF4



# Q9NPJ6



# Q9NPQ8



# Q9NVN3



# Q9NQ48

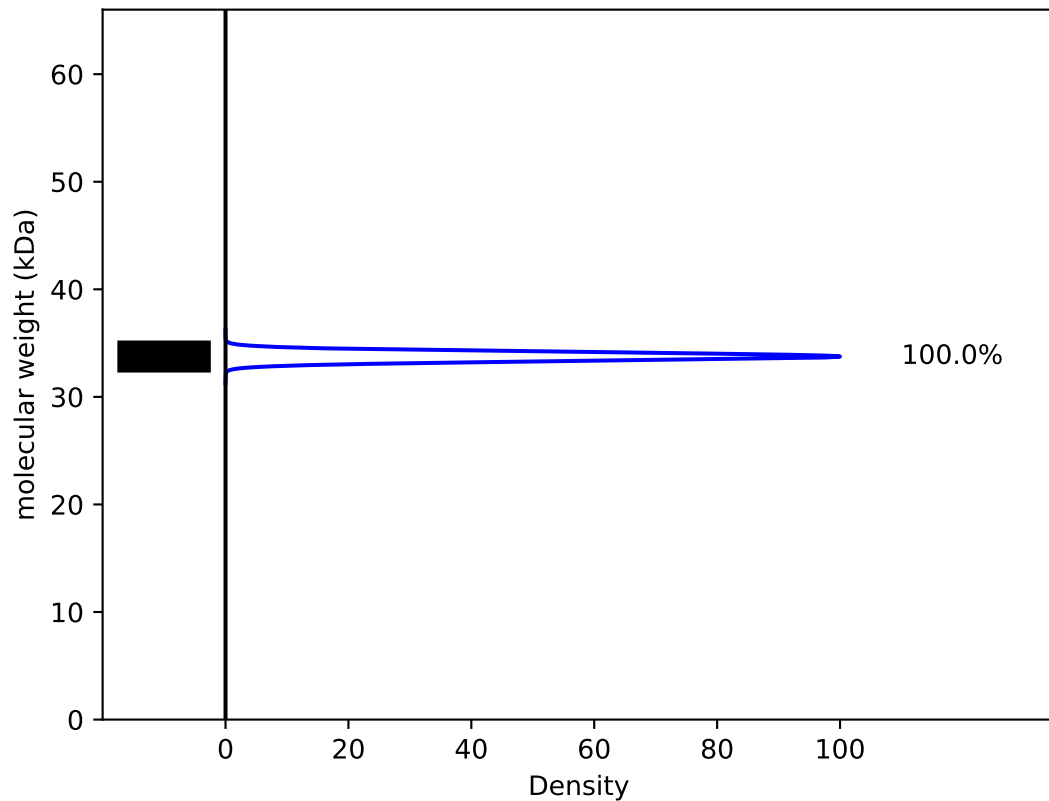



# Q9NQ88



# Q9NQR4



# Q9NQT4



# Q9NQT5



# Q9NR31



# Q9NR45



# Q9NR46



# Q9NR50





# Q9NR56



# Q5VZF2



# Q9NUK0



# Q9NRF9



# Q9NRG0



# Q9NRG7



# Q9NRG9



# Q9NRN7





# Q9NRV9



# Q9NRW3



# Q9NRX1

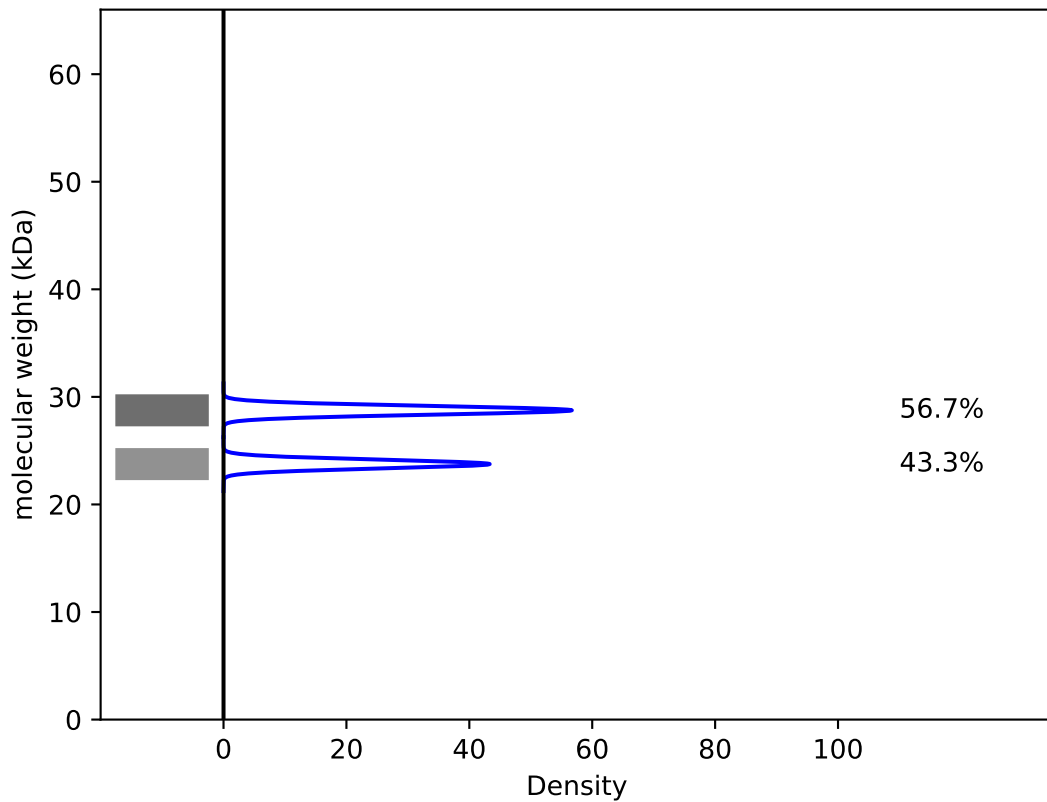

# Q9NRX2



# Q9NRX4



# Q9NS69



# Q9NT62



# Q9NTK5





# Q9NTM9



# Q9NTX5



# Q9NUG6



# Q9NUP9



# Q9NUU7



# Q9UHL0



# Q9NV31



# Q9NV56





# Q9NVA2



# Q9NVJ2



# Q9NVM6

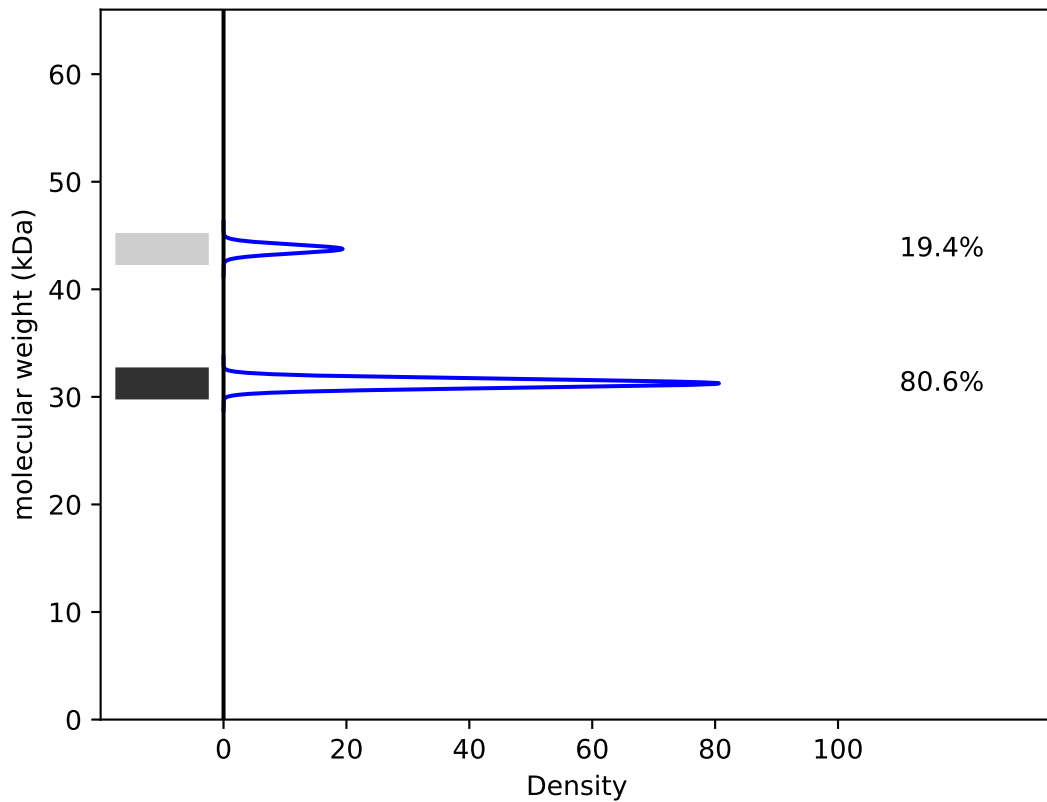

# Q9NVT9



# Q9NW64



# Q9NWS0



# Q9NWW4



# Q9NWX4

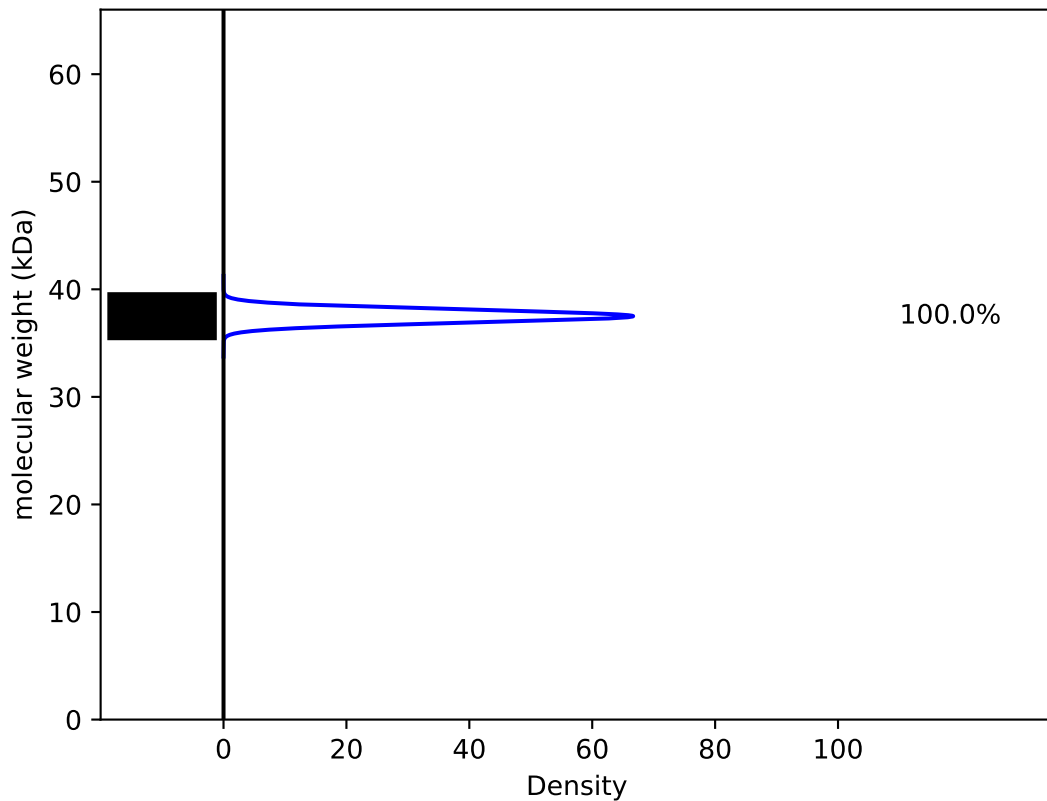



# A8MVJ9



# Q9NX08



# Q9NX24



# Q9NX40



# Q9NX63



# Q9NXG2



# Q9NXR7



# Q9NXS2





# Q9NXV2



# Q9NY12

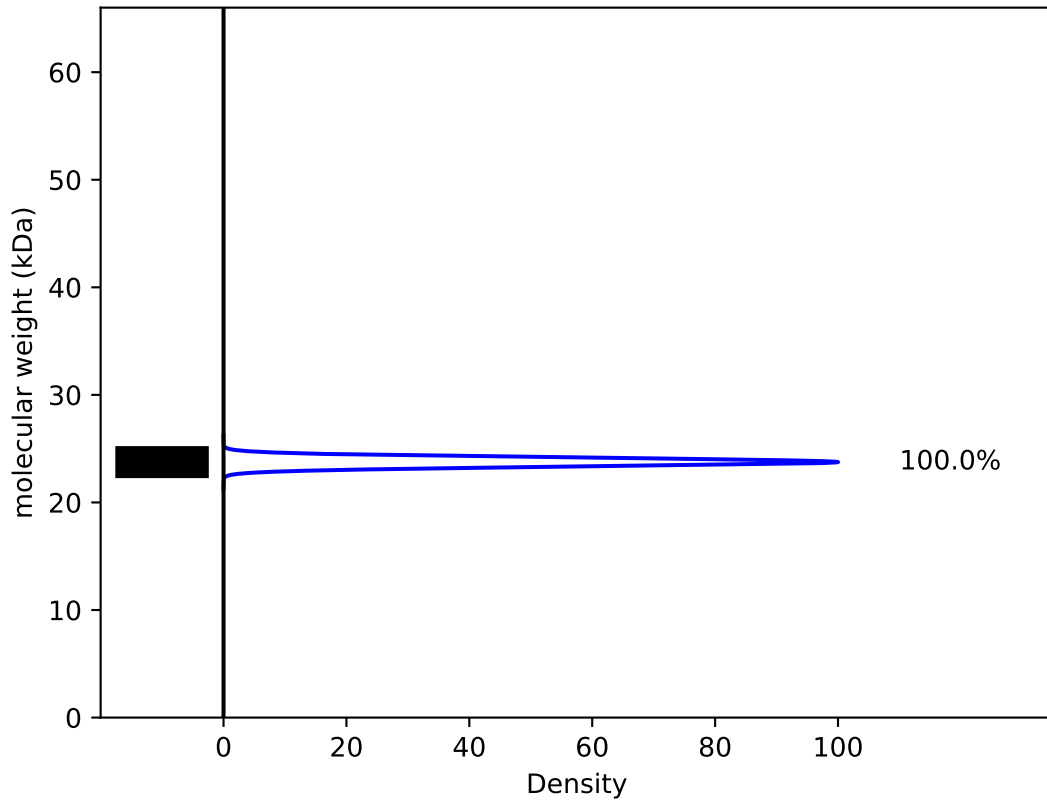

# Q9NYB0

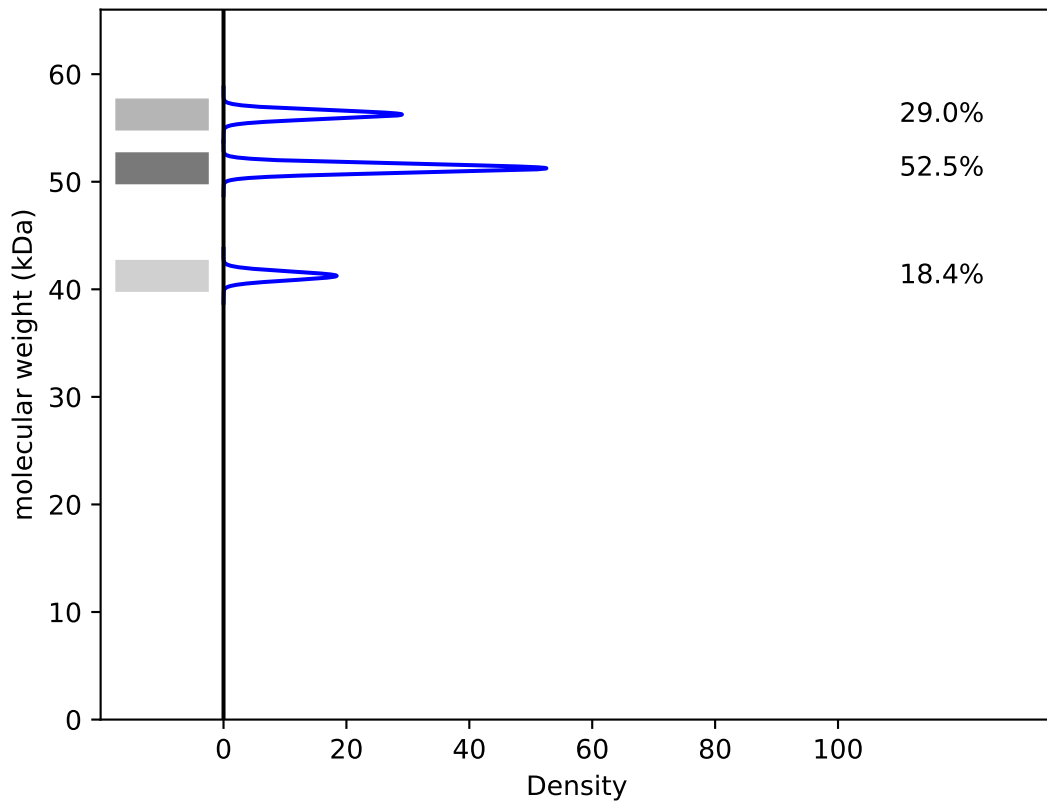

# Q9NYK5



# Q9NYL9



# Q9NYR9



# Q9NZ45



# Q9NZL4





# Q9NZL9



# Q9NZZ3



# Q9P000



# Q9P015



# Q9P016



# Q9P032



# Q9P0I2



# Q9P0L0





# Q9P0M6



# Q9P1F3



# Q9P258



# Q9P289



O00506



# Q9P2T1



# P36959



# Q9P2W1





# Q9P2X0



# Q9UBE0



# Q9UBI1



# Q9UBI6



# Q9UBP6



# Q9UBQ0



# Q9UBQ5



# Q9UBQ7





# Q9UBS4



# Q9UBW8



# Q9UDW1

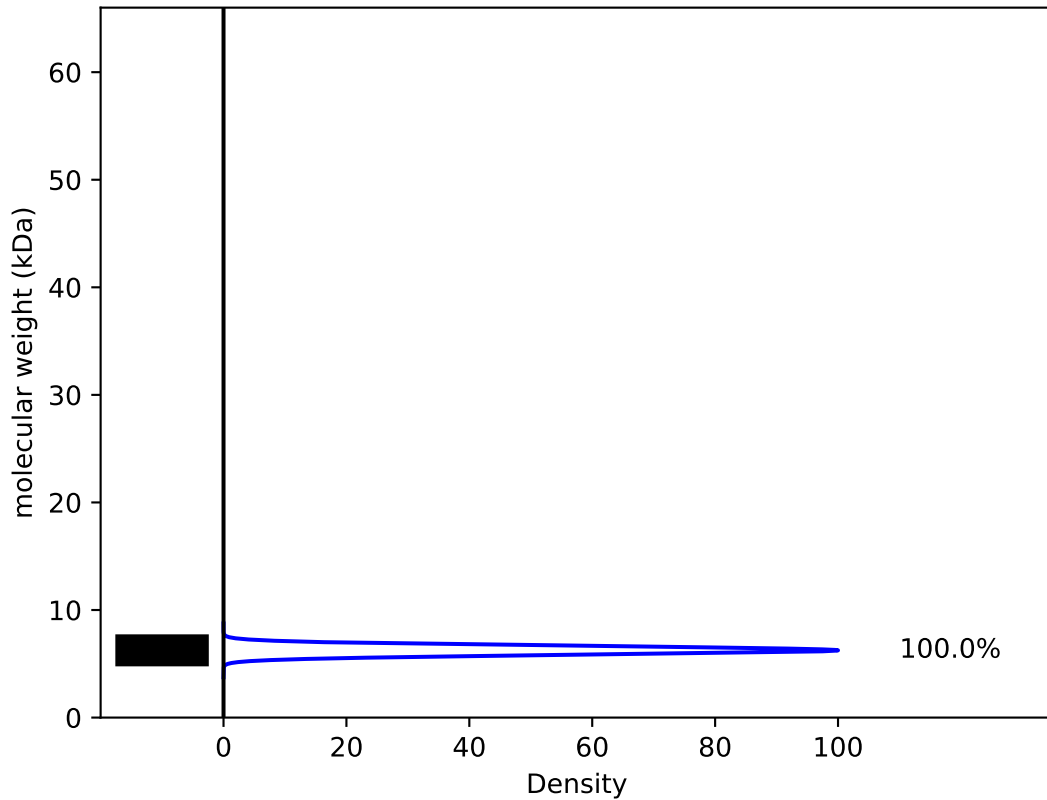

# Q9UDX5



# Q9UDY4



# Q9UET6



# Q9UEW8

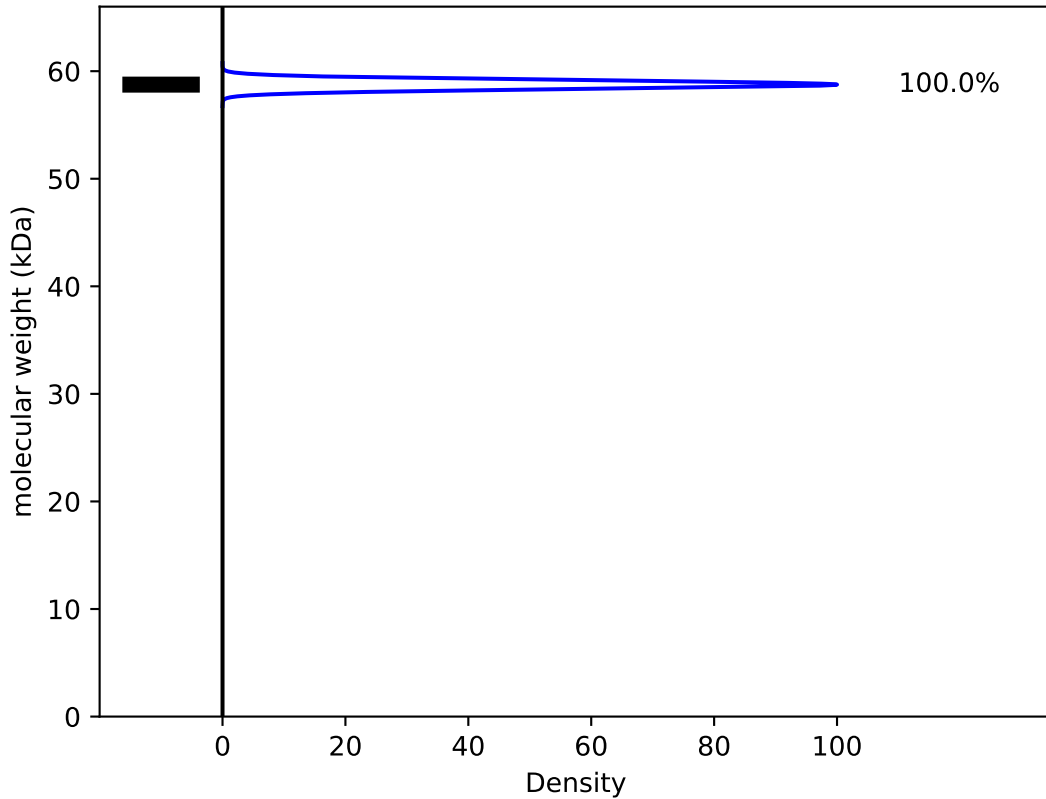

# Q9UGI8





# Q9UGV2



# Q9UH62



# Q9UHA4



# Q9UHD1



# Q9UHV9

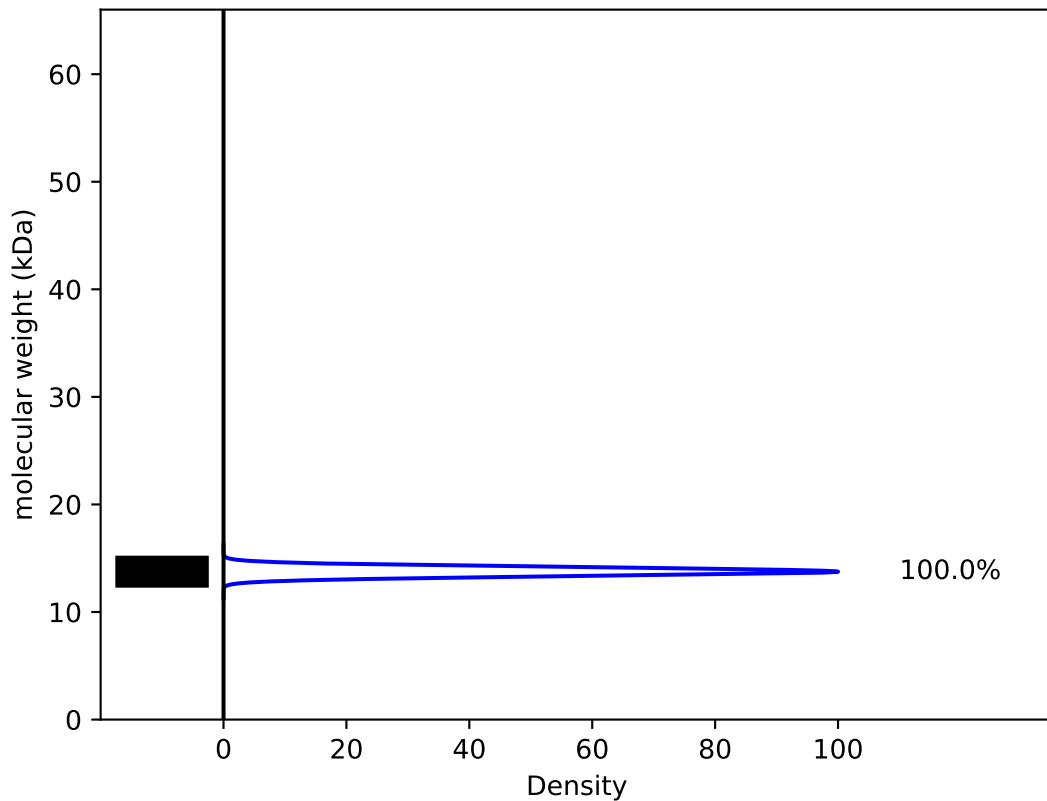

# Q9UHX1



# Q9UHY7



# Q9UI09





# Q9UI30



# Q9UIC8



# Q9UIJ7



# Q9UJ70



# Q9UJA5



# Q9UJK0



# Q9UJW0

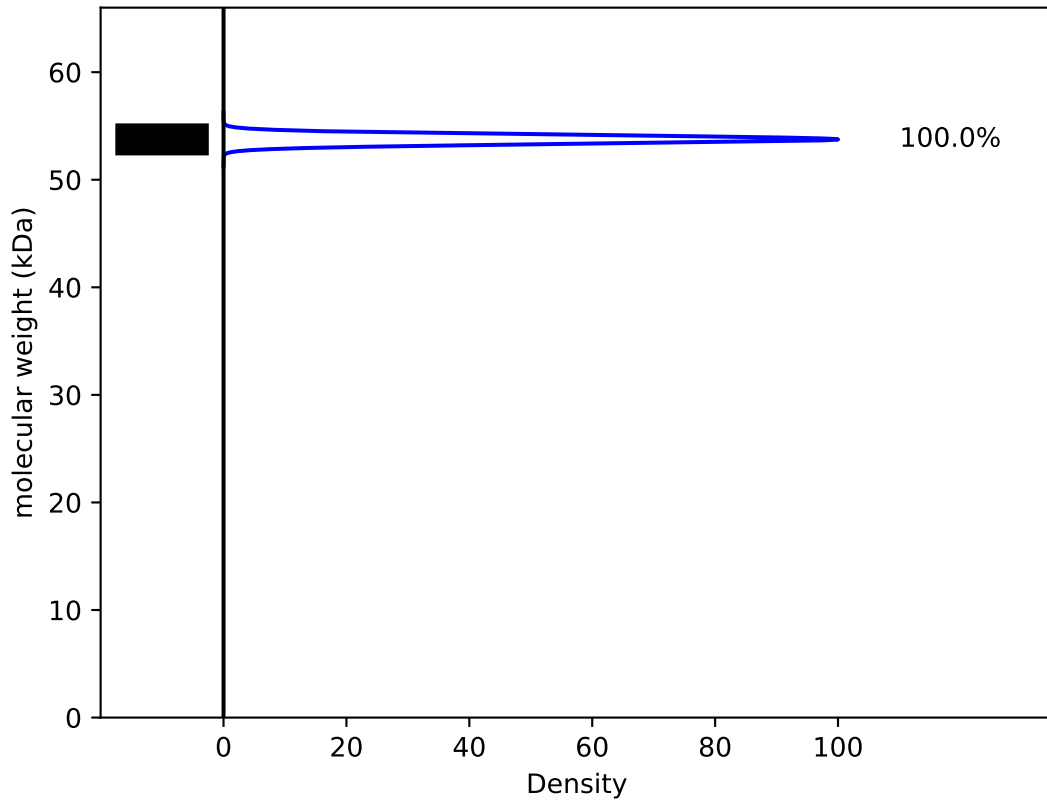

# Q9UJZ1





# Q9UKD2



Q9UKK9



# Q9UKL0



# Q9UKM9



# Q9UKS6



Q9UKX7



# Q9UKY7



# Q9UL15





# Q9UL25



# Q9UL40



# Q9UL46



# Q9ULC4



# Q9ULR0



# Q9ULV4



# Q9UMS0



# Q9UMS4

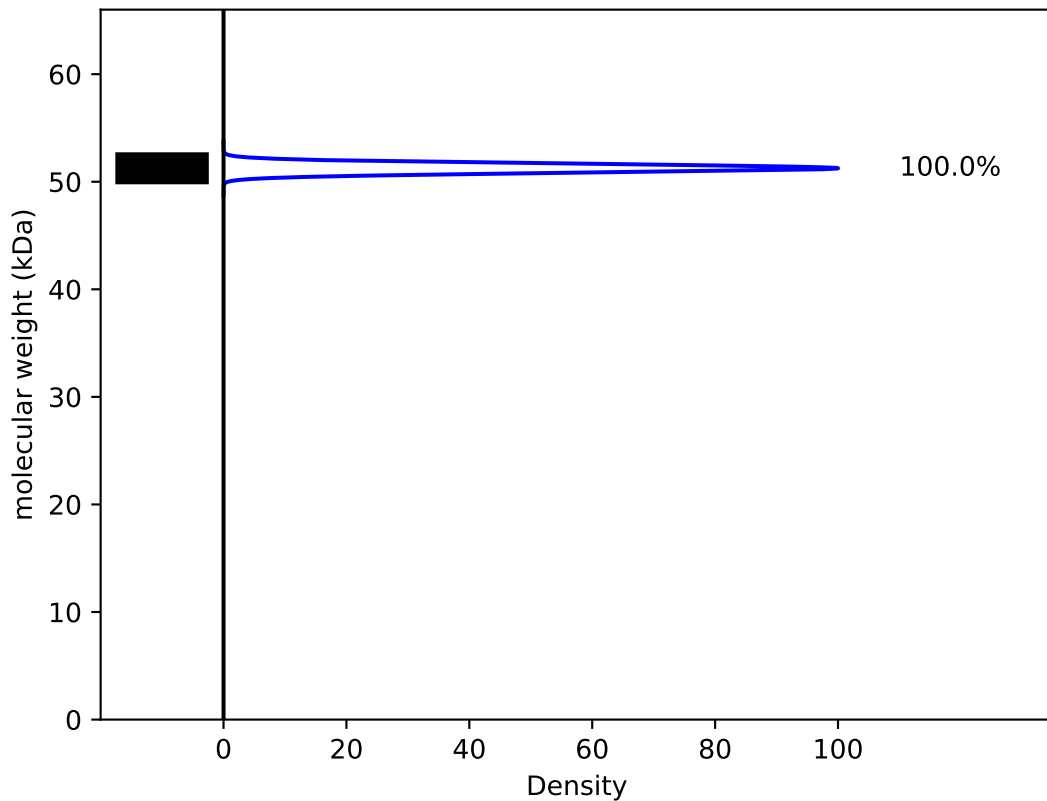



# Q9UMY4



# Q9UN37



# Q9UN86

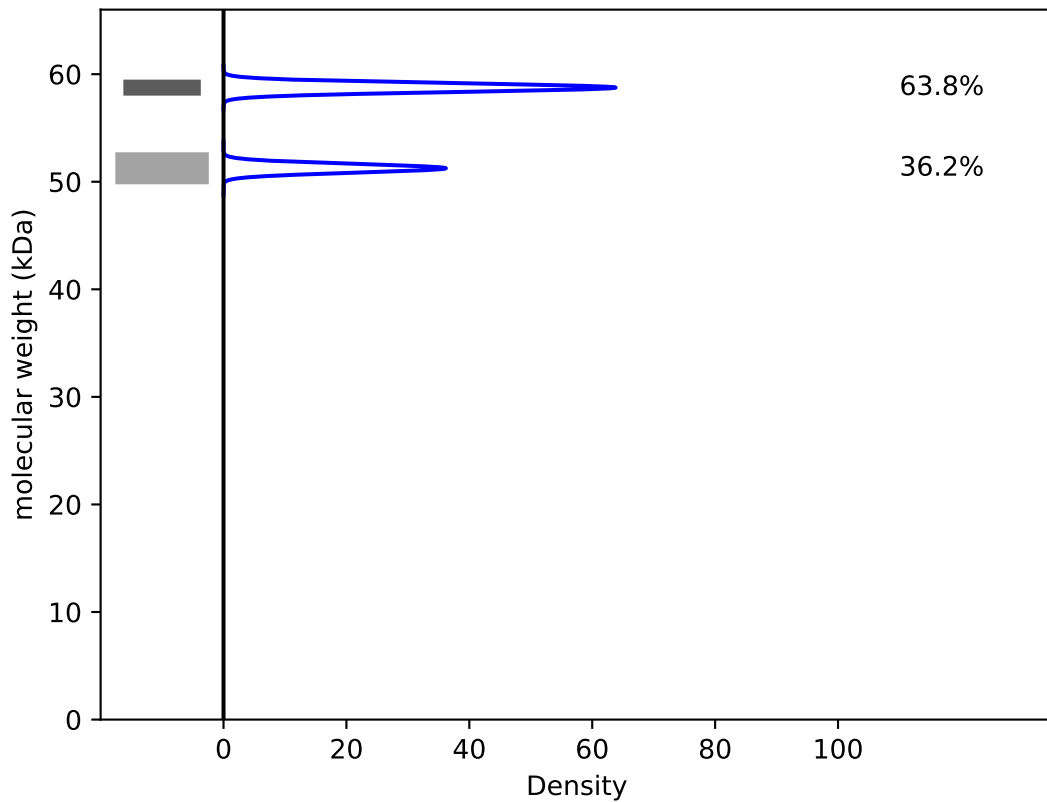

# Q9UNE7



# Q9UNF0



# Q9UNH7



# Q9UNI6



# Q9UNK0





# Q9UNL2



# Q9UNM6



# Q9UNN8

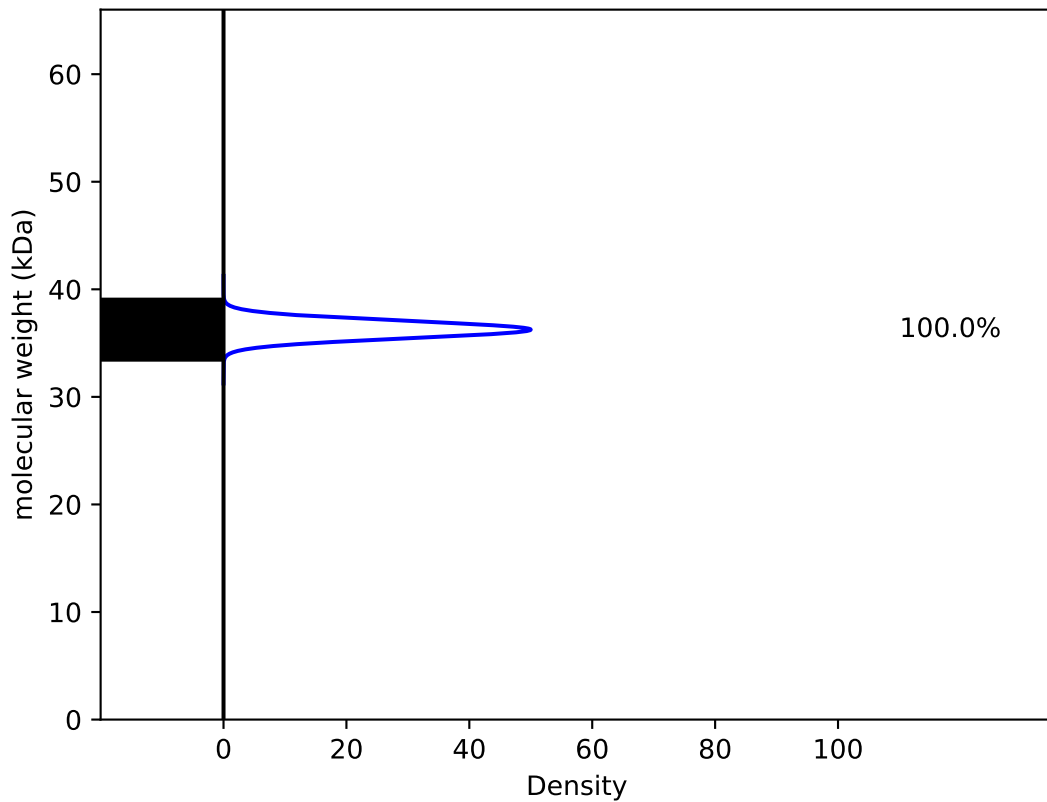

# Q9UNQ2



# Q9UNX3



# Q9UNZ2



# Q9UQ80



Q9Y221





Q9Y224



# Q9Y230



Q9Y237



# Q9Y265



# Q9Y266



# Q9Y277



# Q9Y281



# Q9Y282





# Q9Y285



# Q9Y291



# Q9Y295



# Q9Y2B0



Q9Y2C4



Q9Y2P8



Q9Y2Q3



Q9Y2R5





Q9Y2R9



# Q9Y2T2



P53677



# Q9Y2Z0



# Q9Y305



# Q9Y314



# Q9Y315



# Q9Y333





# Q9Y371



# Q9Y376

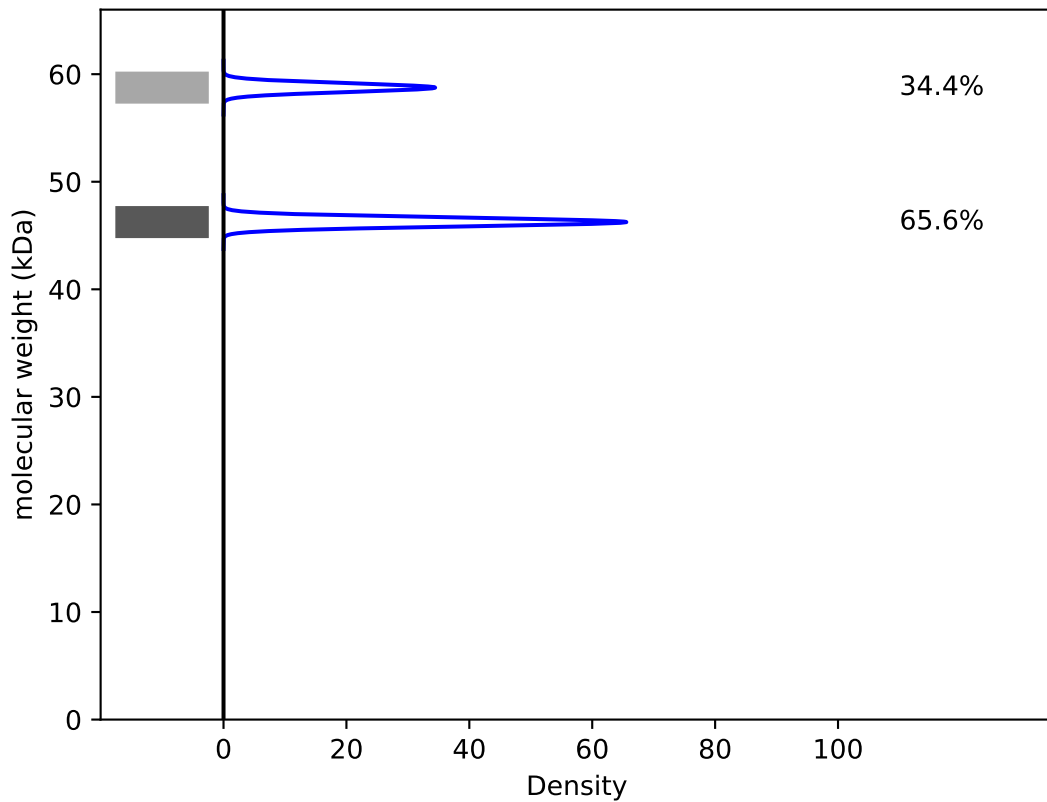

# Q9H9S4



# Q9Y383



# Q9Y394



# Q9Y3A5



# Q9Y3B2



# Q9Y3B3

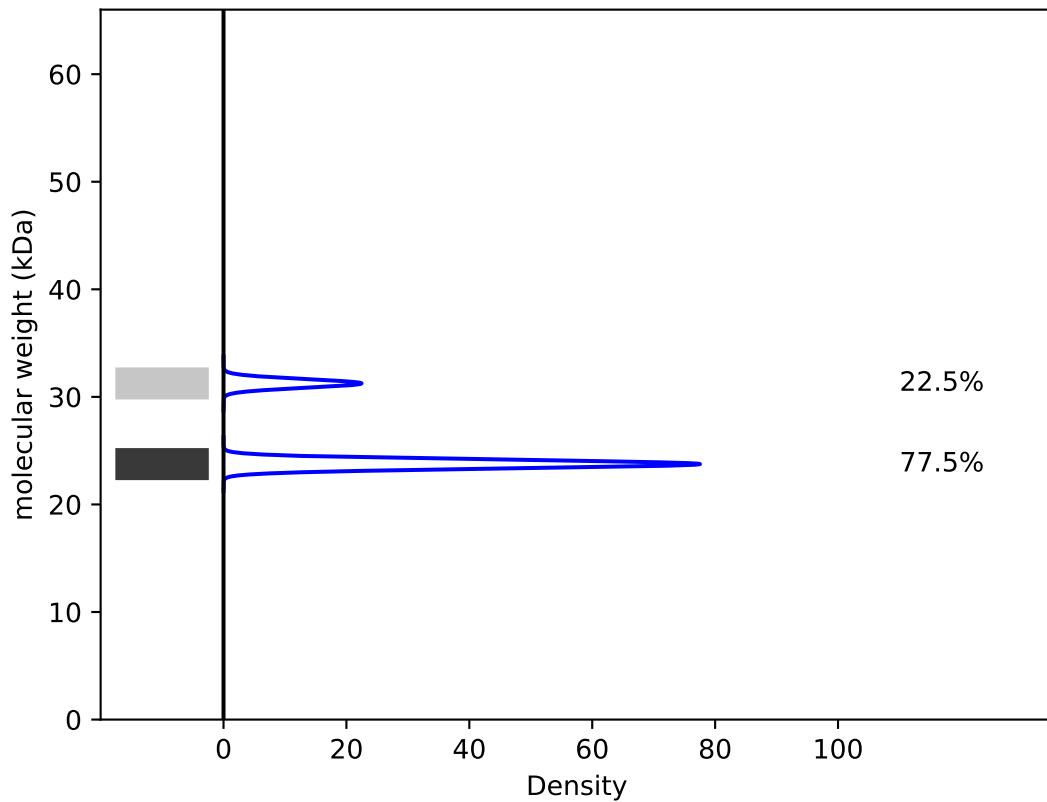



# Q9Y3B4



# Q9Y3B7



# Q9Y3B8



Q9Y3C4



Q9Y3C6



Q9Y3C8



Q9Y3D0



Q9Y3D3





Q9Y3D6



Q9Y3D8



Q9Y3D9



Q9Y3E5



Q9Y3F4



# Q9Y3I0



Q9Y3U8



Q9Y3Y2





# Q9Y4P1



Q9Y4Z0



# Q9Y508

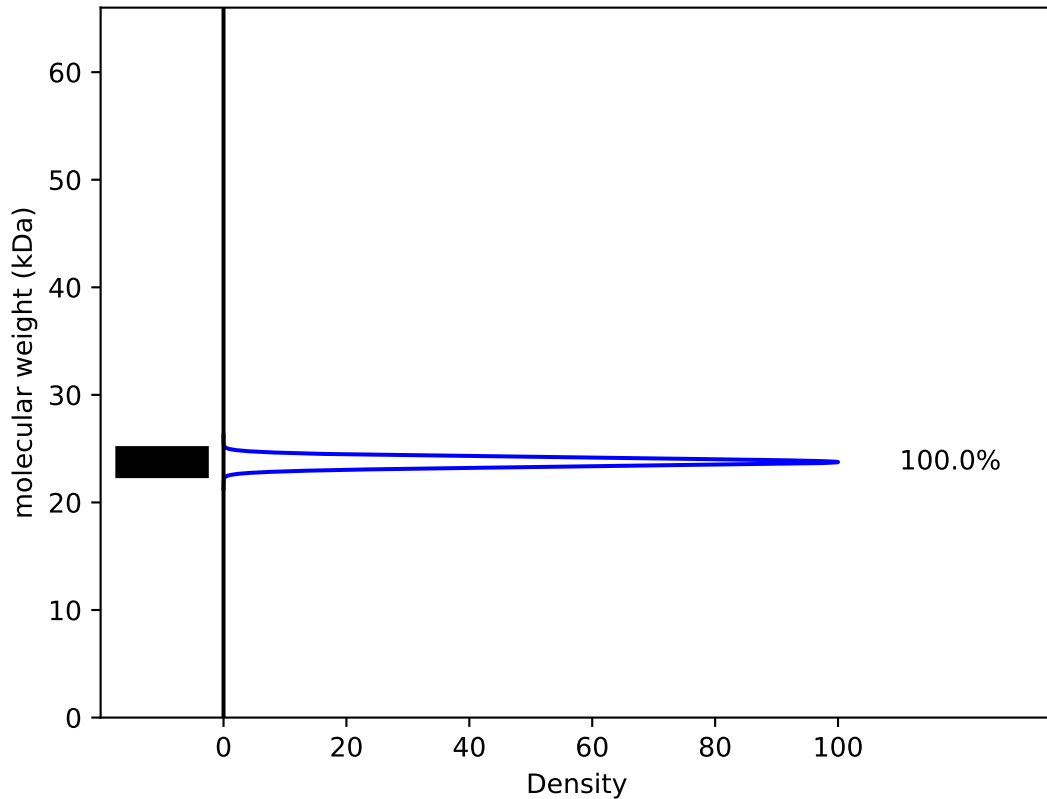

Q9Y512



# Q9Y530



# Q9Y570



Q9Y5K5



Q9Y5K8





# Q9Y5M8



# Q9Y5P6



Q9Y5Q8



# Q9Y5S9



# Q9Y5X3



Q9Y5Y2



Q9Y617



# Q9Y624





# Q9Y676



# Q9Y696



O15247



Q9Y6A4



# Q9Y6B6



Q9Y6C9



Q9Y6E0



Q9Y6E2





Q9Y6G9



P05787



# Q8N1A0

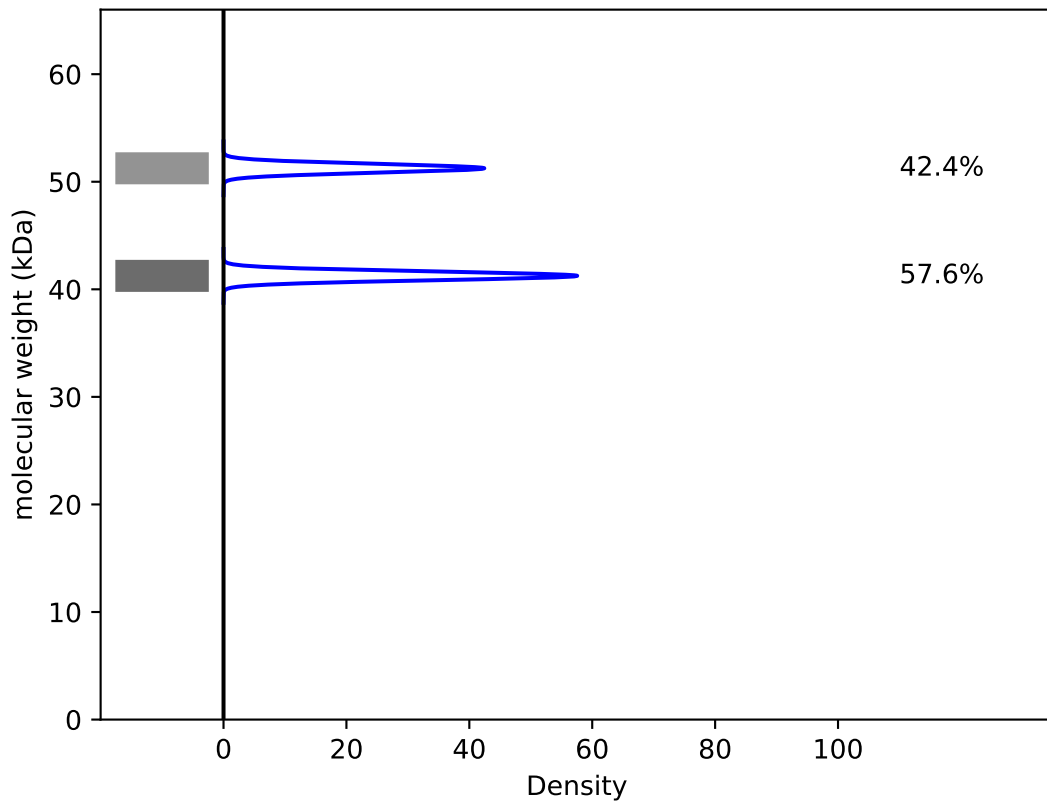

# P19013



Q04695



# Q86Y46



# Q7RTS7



# Q3SY84





# Q9BYR2



# Q9BQ66



# Q9BYQ5



# Q9BYR0



# A6NDG6



# A6NDU8



# A6NIH7



# A8MXV4





O00151



O00154



O00165



O00170



O00204



O00231



000232



000233





O00264



000273



000299



O00303



O00442



O00487



O00560



O00629





O00743



O00764



O14530

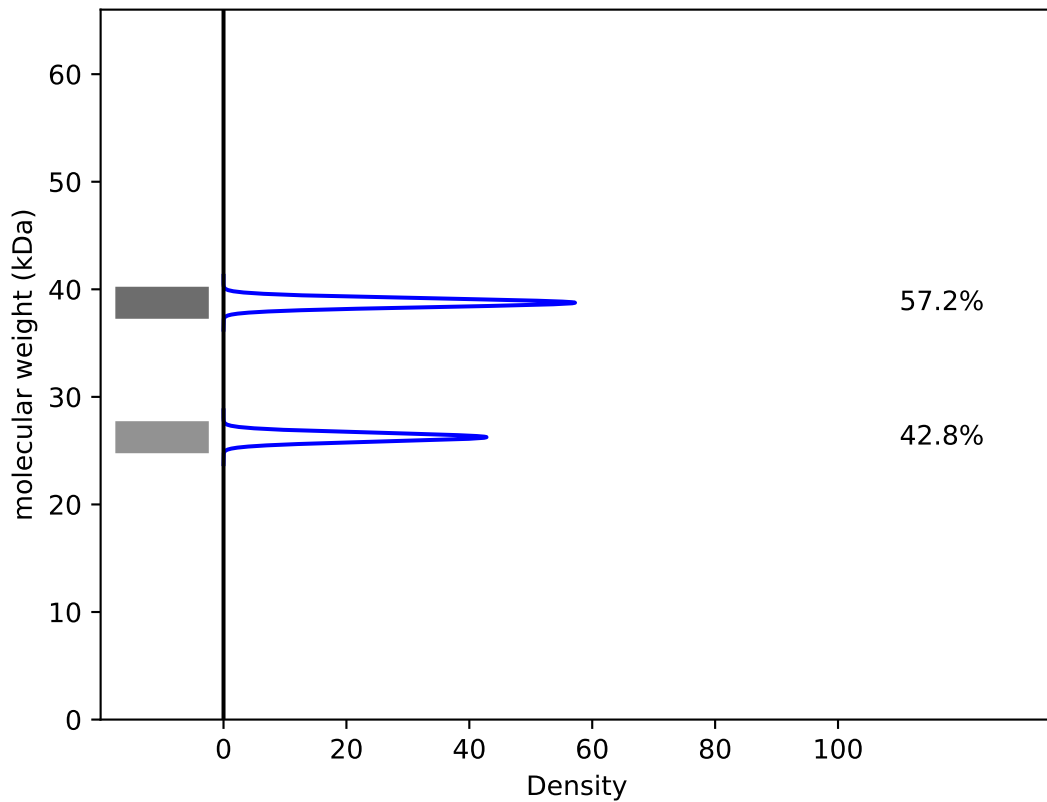

P47813



O14602



O14656



O14737



O14745





O14818



# Q8TAA3



O14879



O14907



O14908



O14949



# P19105



O14950





P24844



# O15145



# O15160



O15173



# O15269



O15305



O15347



O15372





O15460



# O15498



O43148



O43159



O43172



O43242



O43251



# Q9NWB1





O43324



O43396

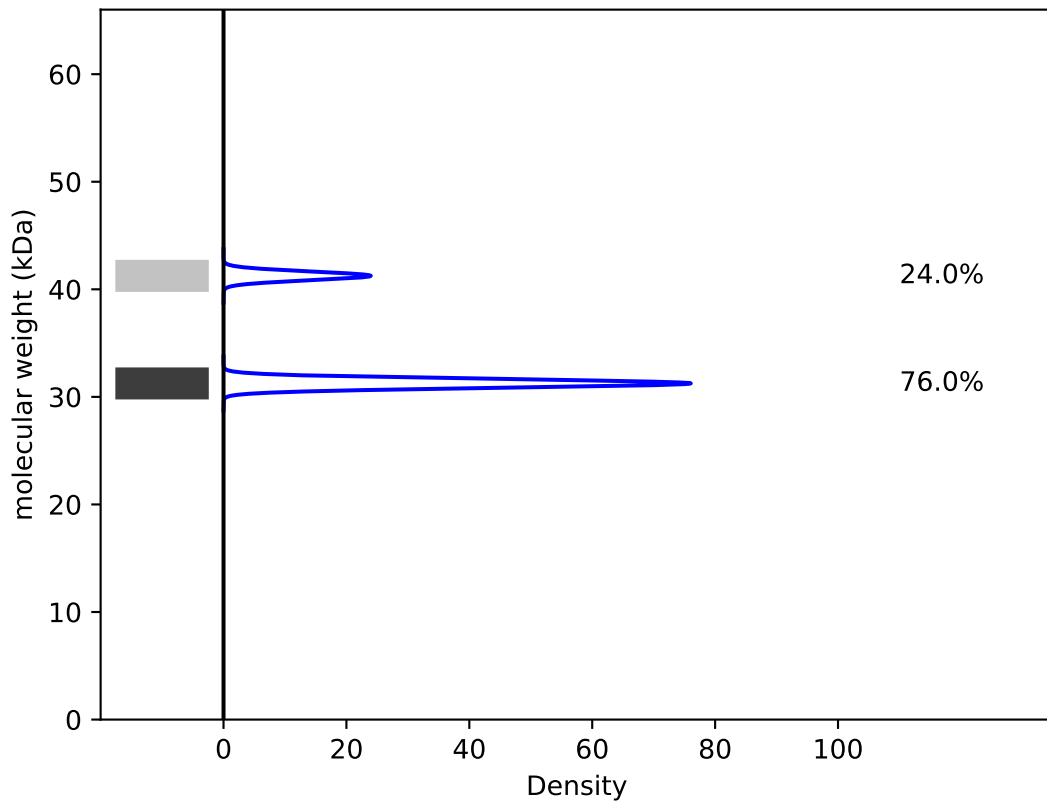

O43399



O43402



# Q8NHP1



O43583



O43598

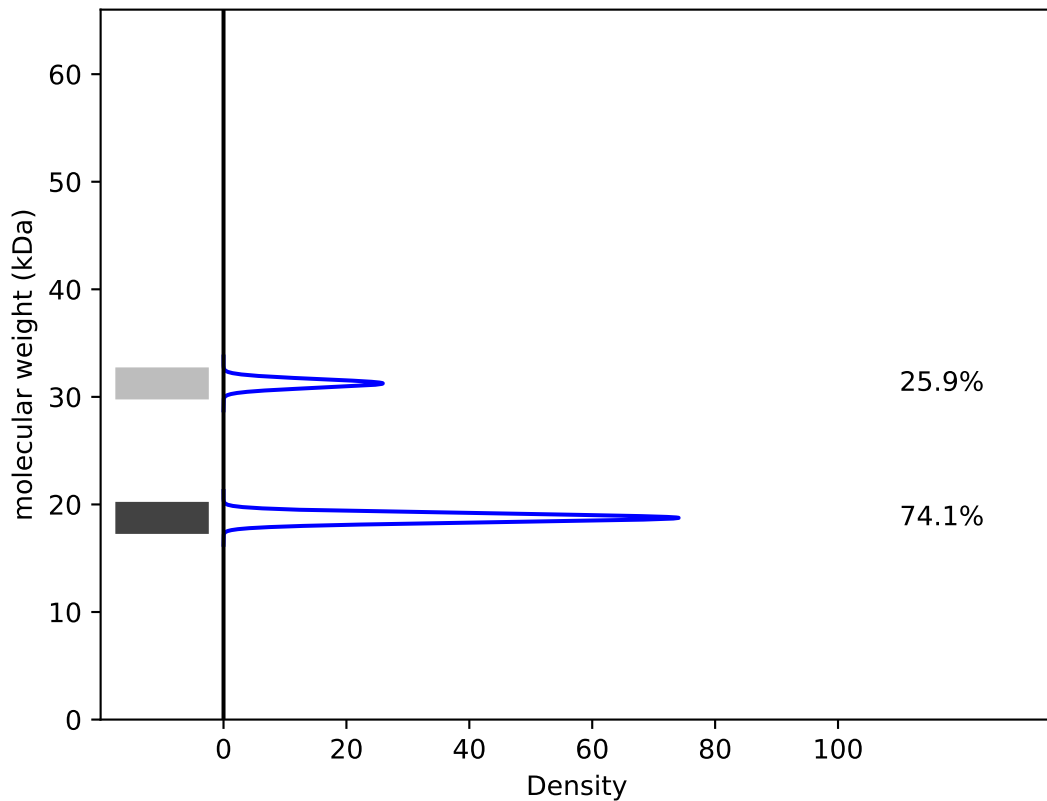

O43617





O43660



O43670



O43676



O43681



O43684



O43765



O43809



O43818





O43920



O60256



O60573



O60664



O60678



O60701



O60814



P57053





O60830



O60832



O60869



O60884



O75131



# Q96FN4



O75223



O75347





O75351



O75367



O75368



O75396



O75436



O75477



O75521



O75569





O75607



O75608



O75663



O75695



O75718



O75792



O75794



O75821





O75828



O75832



O75934



O75935



O75937



O75947



O75955



O76003





O76027



O76070



O76071



O76075



O94760



O94766



O94788



O94905





O95159



O95168



O95218



O95232



O95249



O95292



O95295



O95336





O95372



O95376

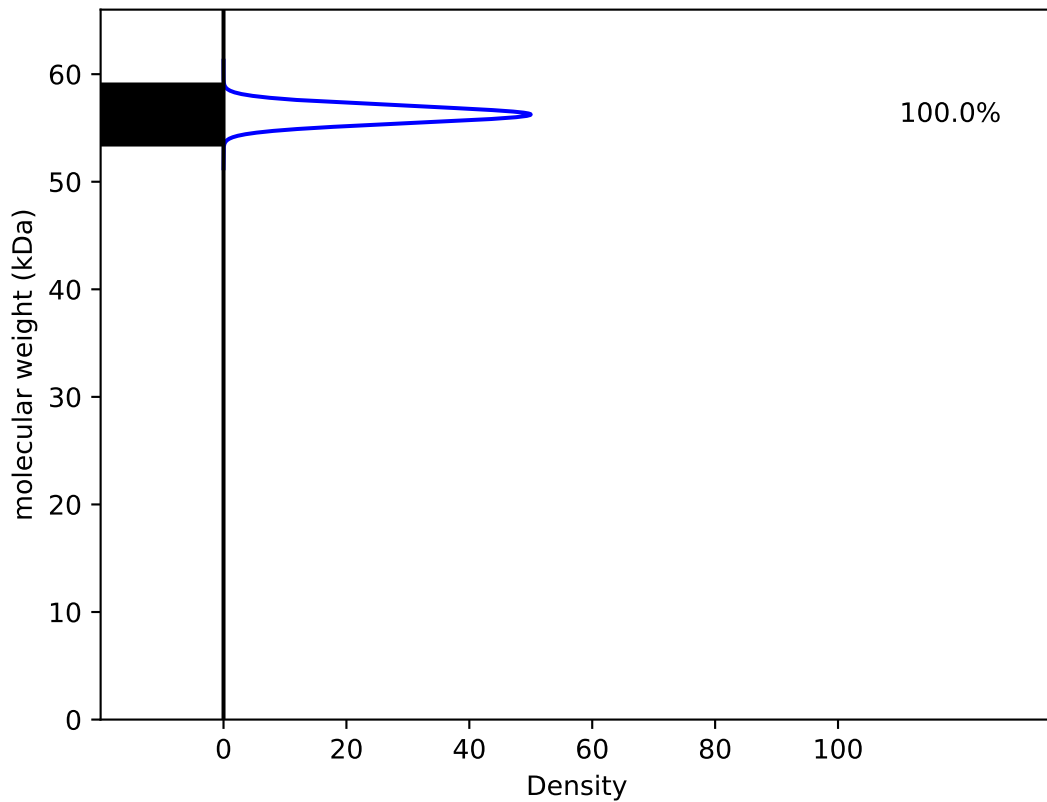

O95394

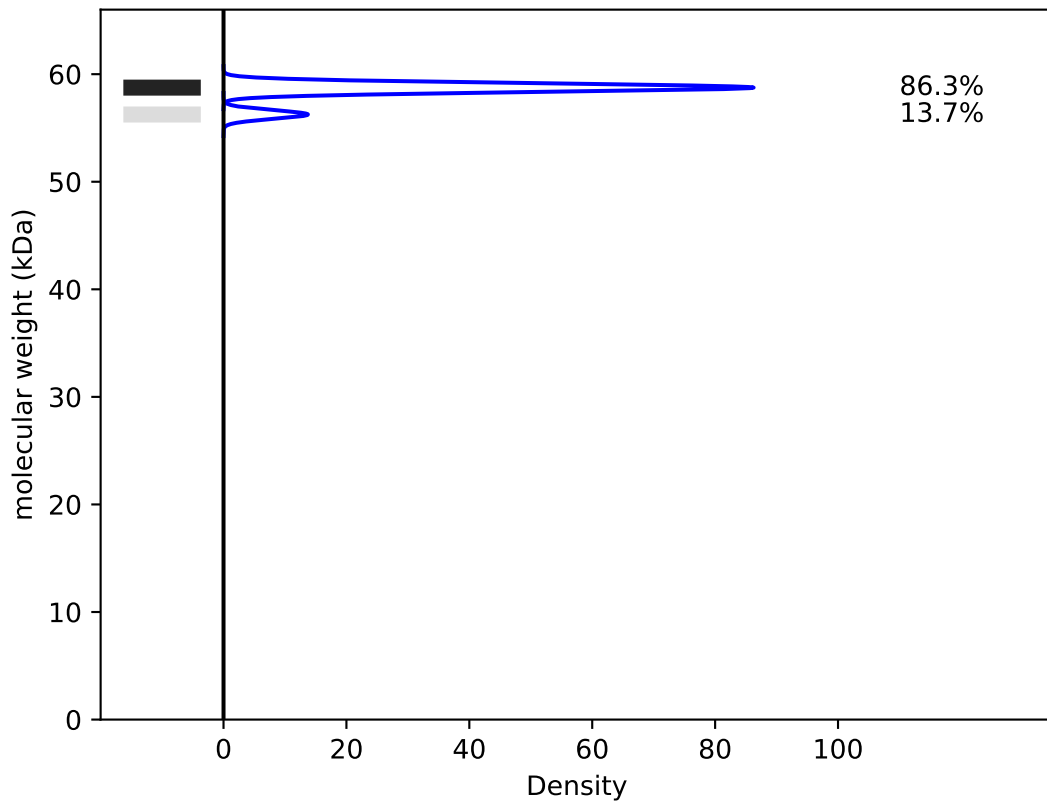

O95433



O95456



O95619



O95630



O95716





O95721



O95747



O95749



O95777



O95801



O95816



O95825



O95861





O95881



O95926



O95983



O96000



O96019



O94805



P00387



P00491





P00492



P00558



P07205



P00568



P00918



# P01111



P01112



P01857





# P01861



# P01860



# P01889



# Q31610



P30486

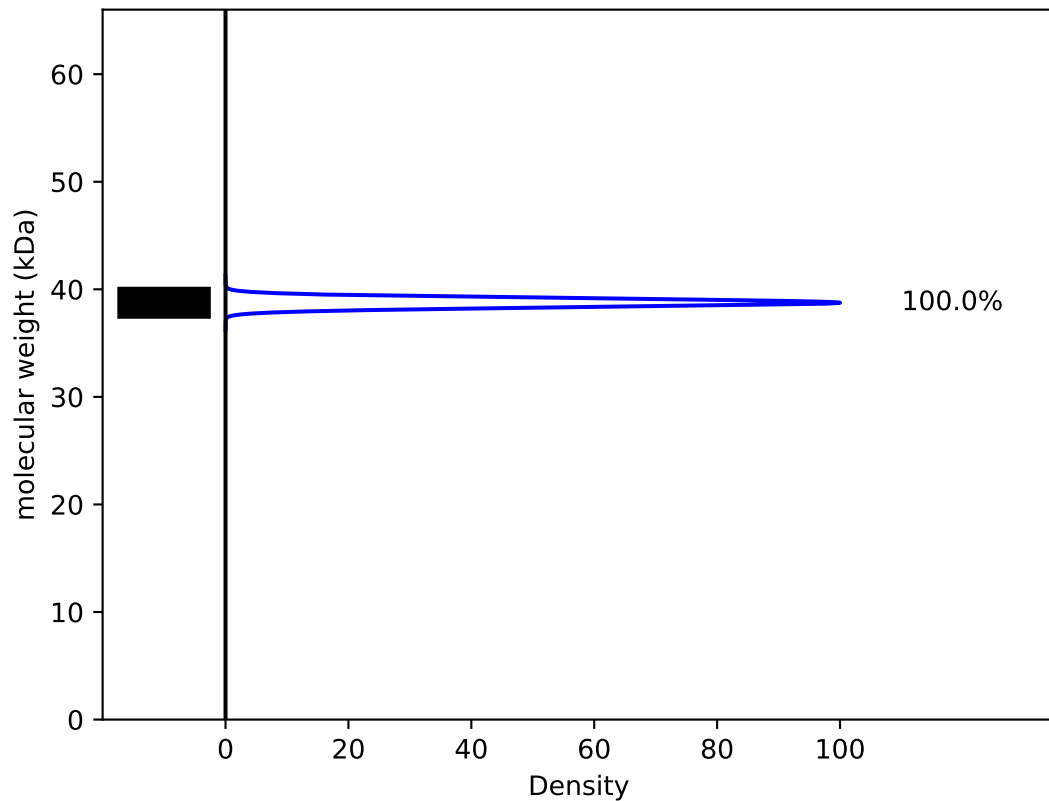

P04222



# P13747



# P17693





# P01892



# P30459



# P10314



# P16189



# P30512



# Q09160



P02649



P04066





P04075



P04080



P04083



P04181

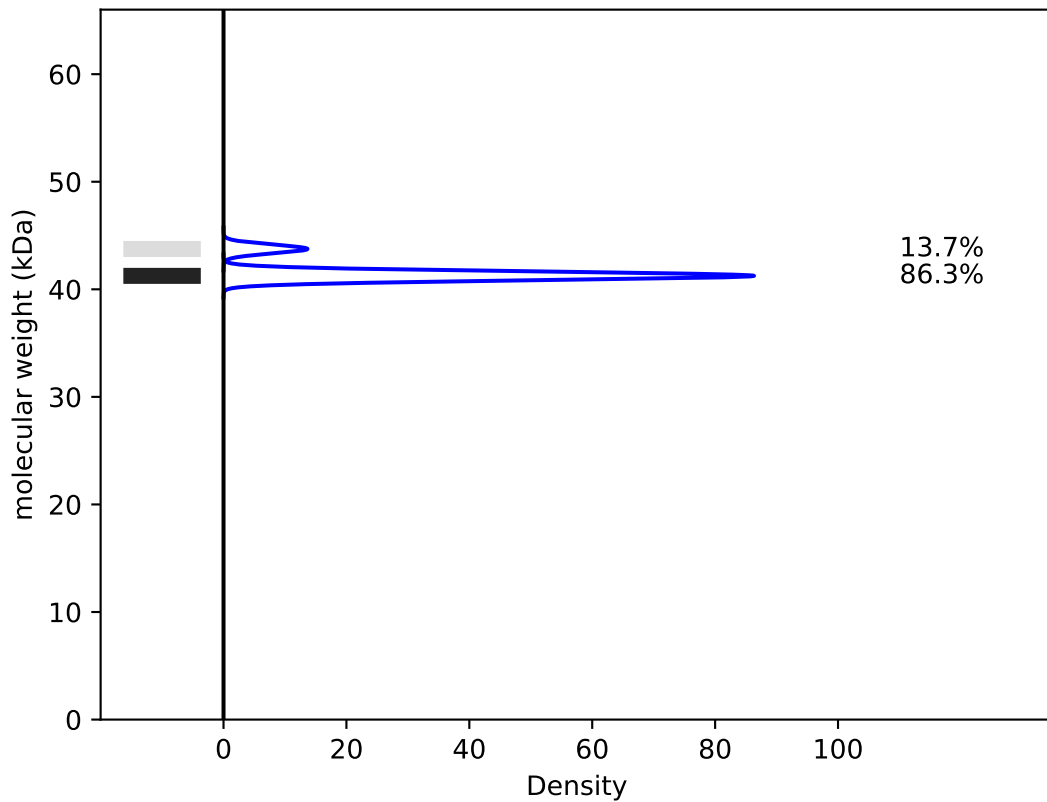

P04183



P04350



P04406



P04632





P04637

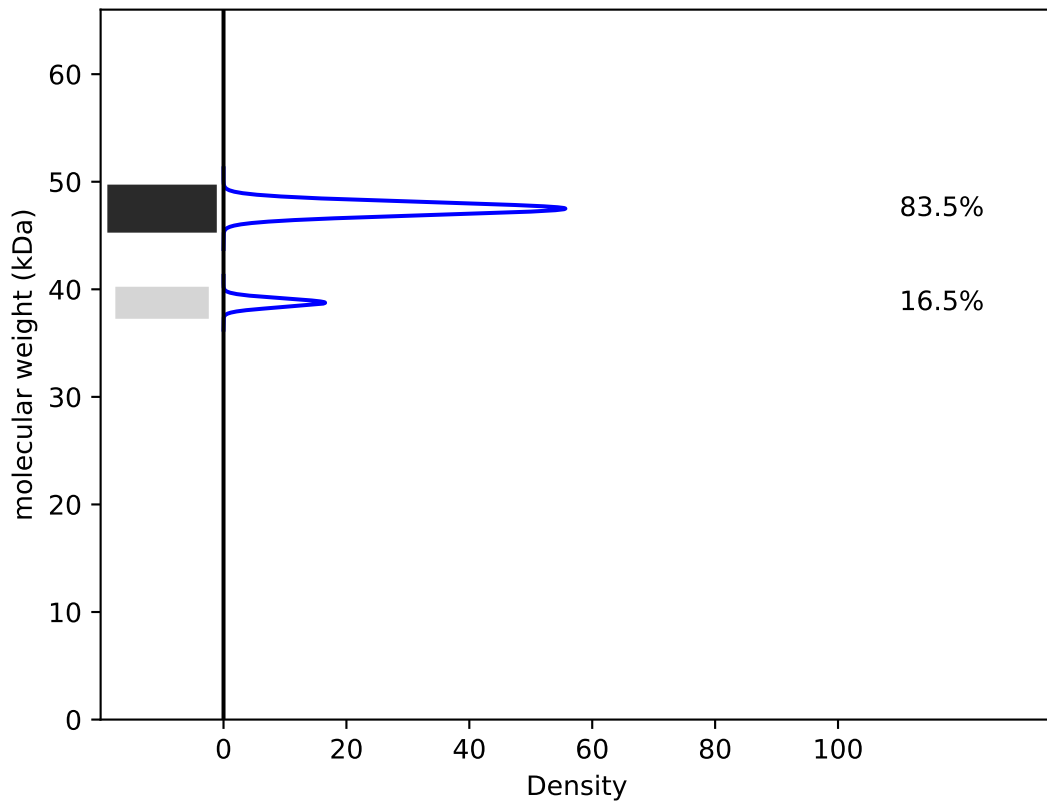

P04792



P04899



P05026



P05089



P05198



P05388



# Q8NHW5





P05455



P05783



P06132



P06730



P06733



P06746



P06748



P06753





P07237



P07355



# A6NMY6



P07437



# A6NNZ2



P07737



P07741



# Q14568





# Q58FG0



# Q58FG1



P07910



O60812



# B2RXH8



# PODMR1



# B7ZW38



P08397





P08559



P29803



P08579



P08670



P17661



P41219



# P14136



P08708





P08754



P09471



# P11488



P19087



# A8MTJ3



P08865



P09012



P09104





P09132



P09211



P09417



P09429



# B2RPK0



P09525



P09622



# Q32P51





P09661



P09913



P09914

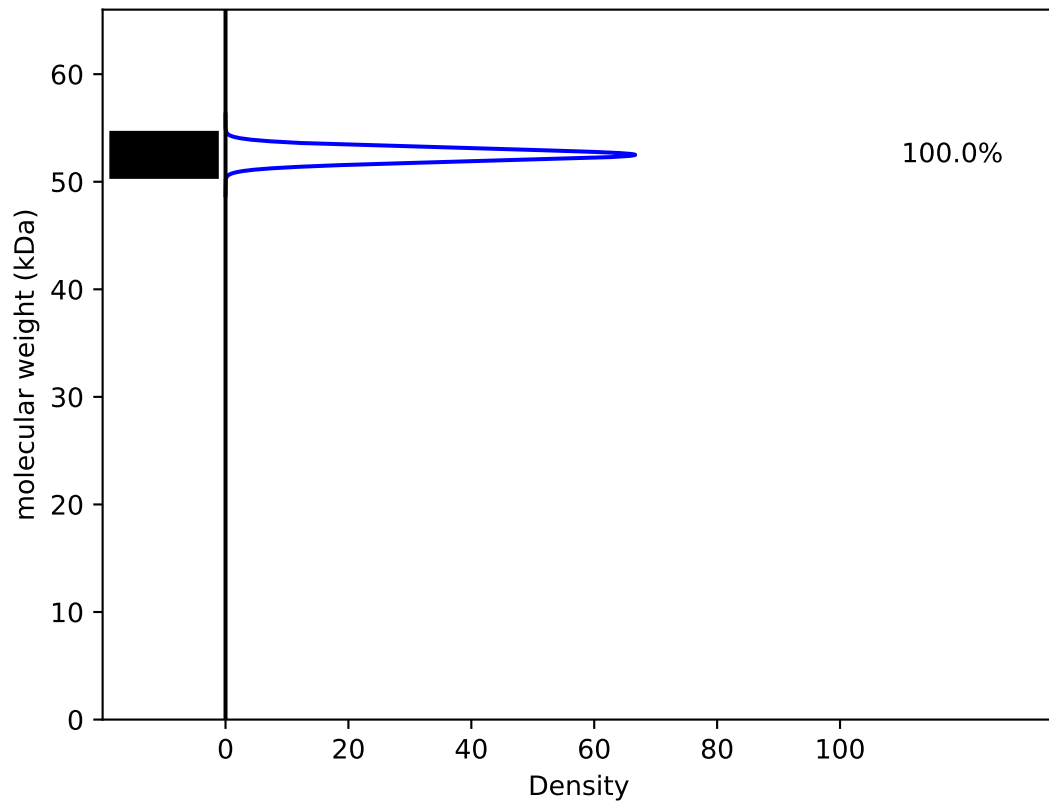

P09936



P09972



# Q71UI9



# POC055



# Q01081





# PODN76



# Q8WU68

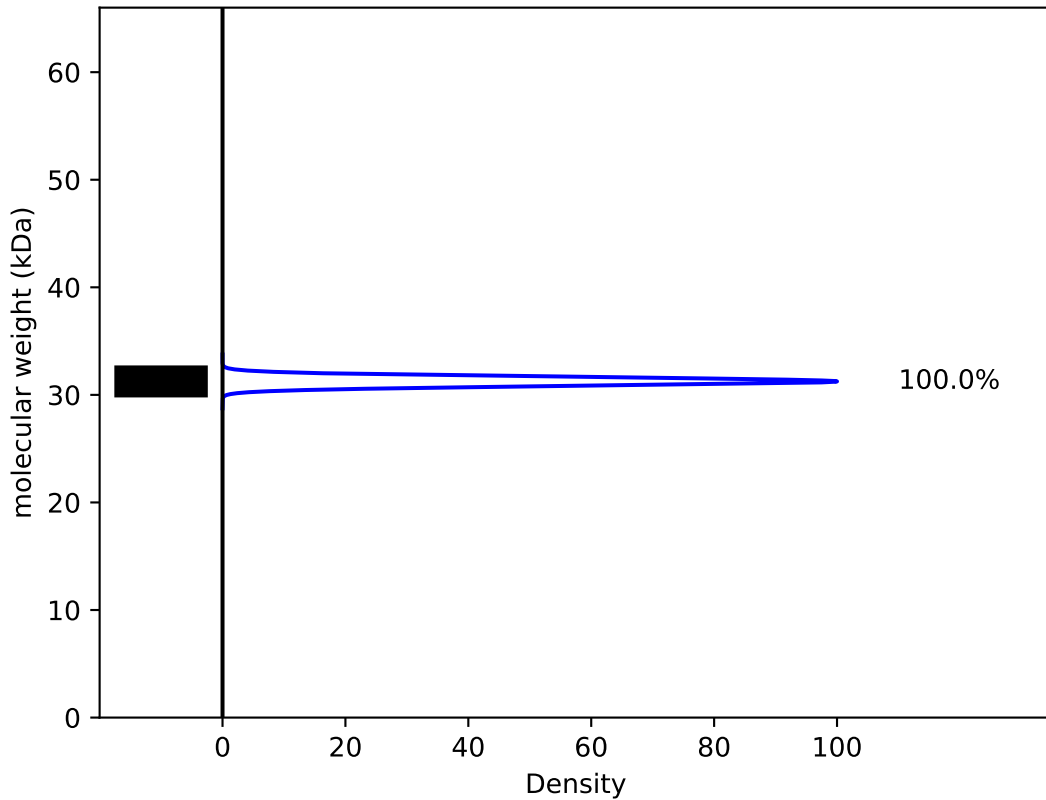

# P35520



# P0DN79



# P10316



P01891



P30457

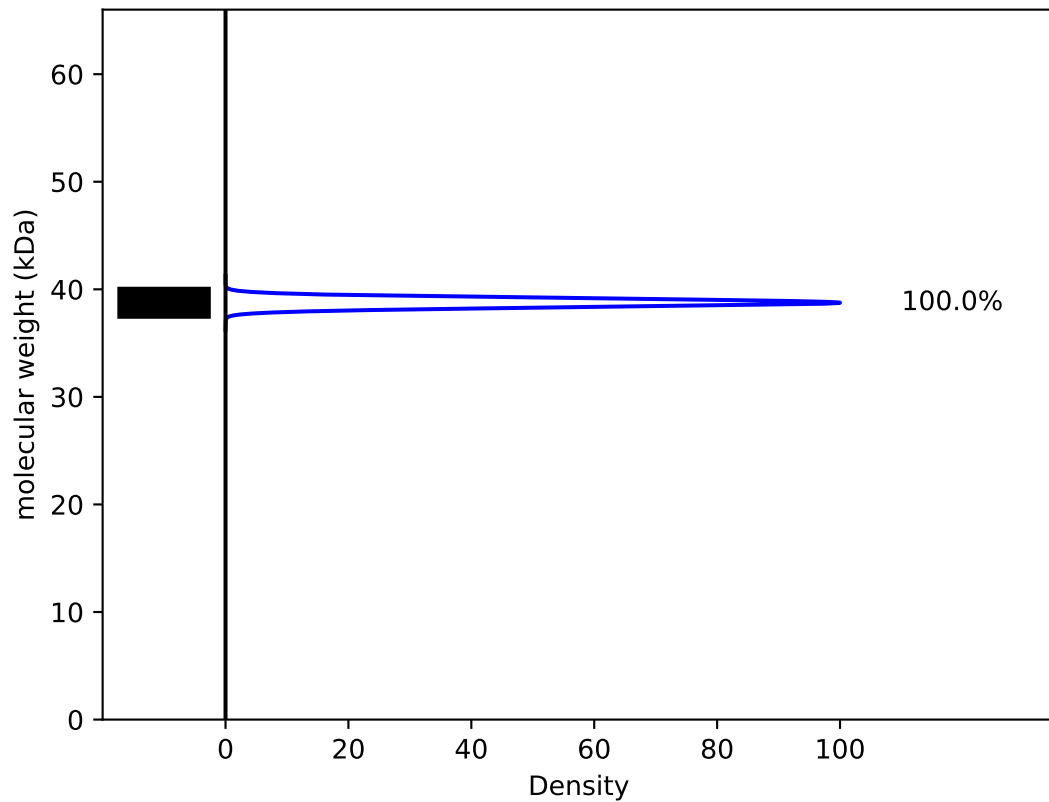

# P30453





# P30450



# P18462



# P16190



# P30456



P10321



P10412



P22492



Q02539





# P10599



# P10644



# P10768



# P10809



# P11172



# P11182



# P11233



P11234





# P11441



# P11766



# P11802



# P11908

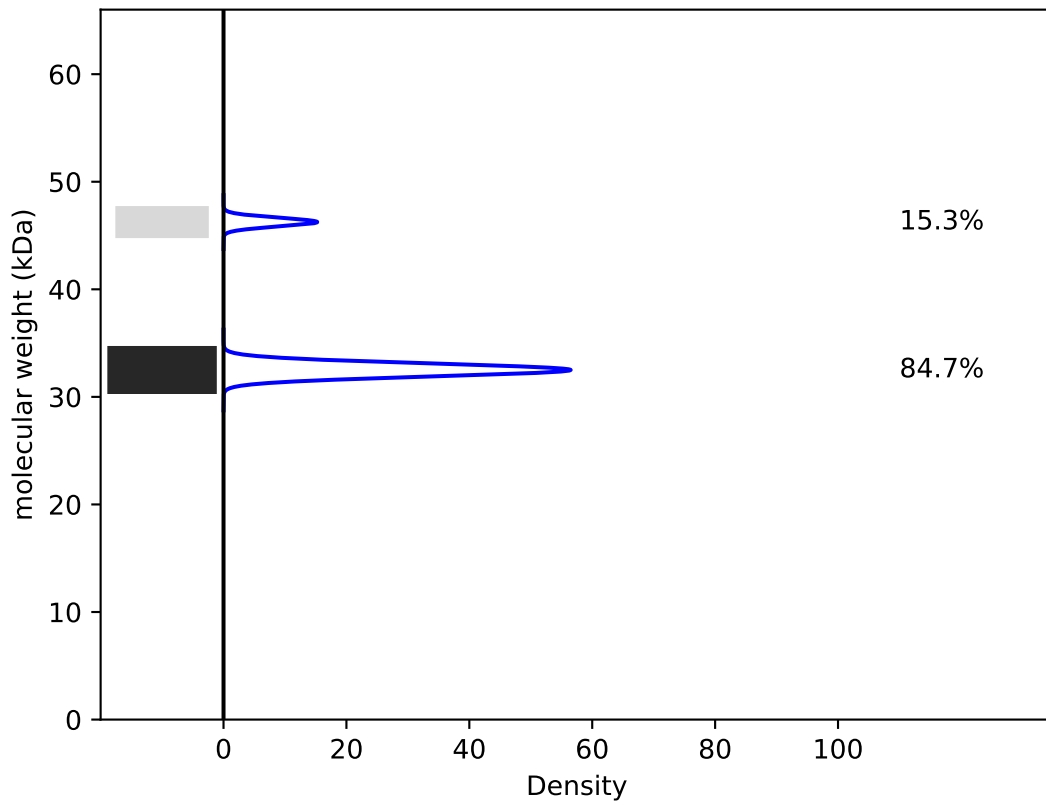

# P12004



# P12268



P12277



P06732





# P12429

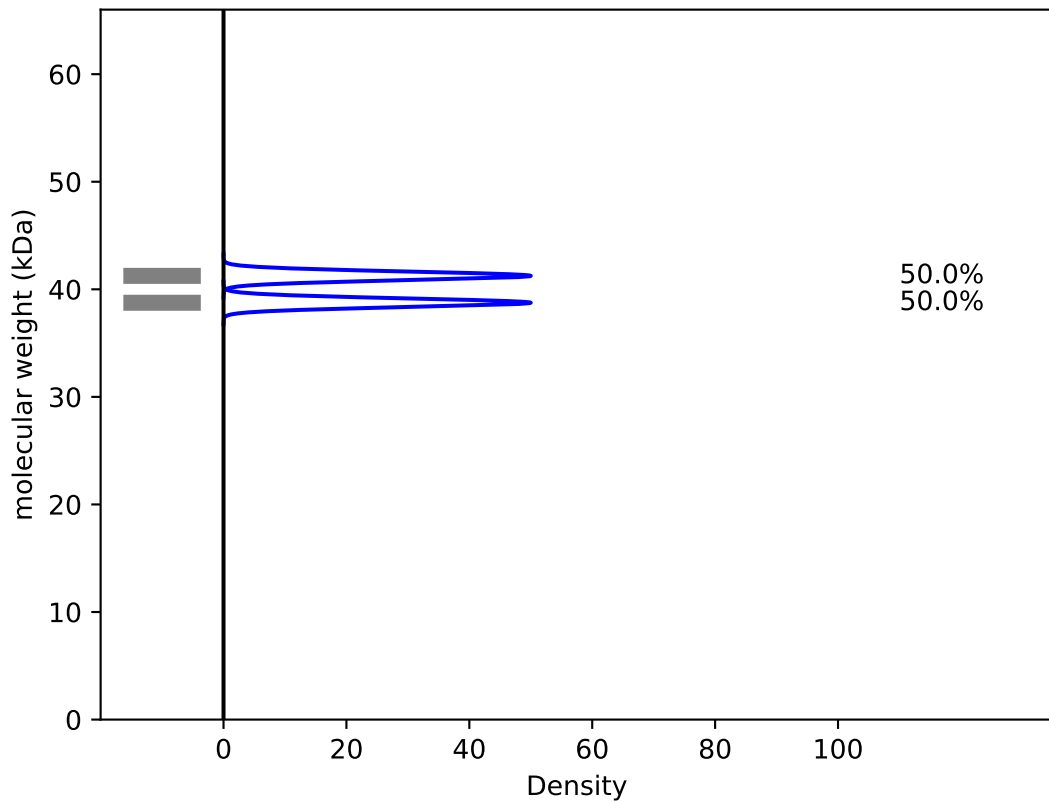

# P12955



P13674



# P13693



# Q9HAU6

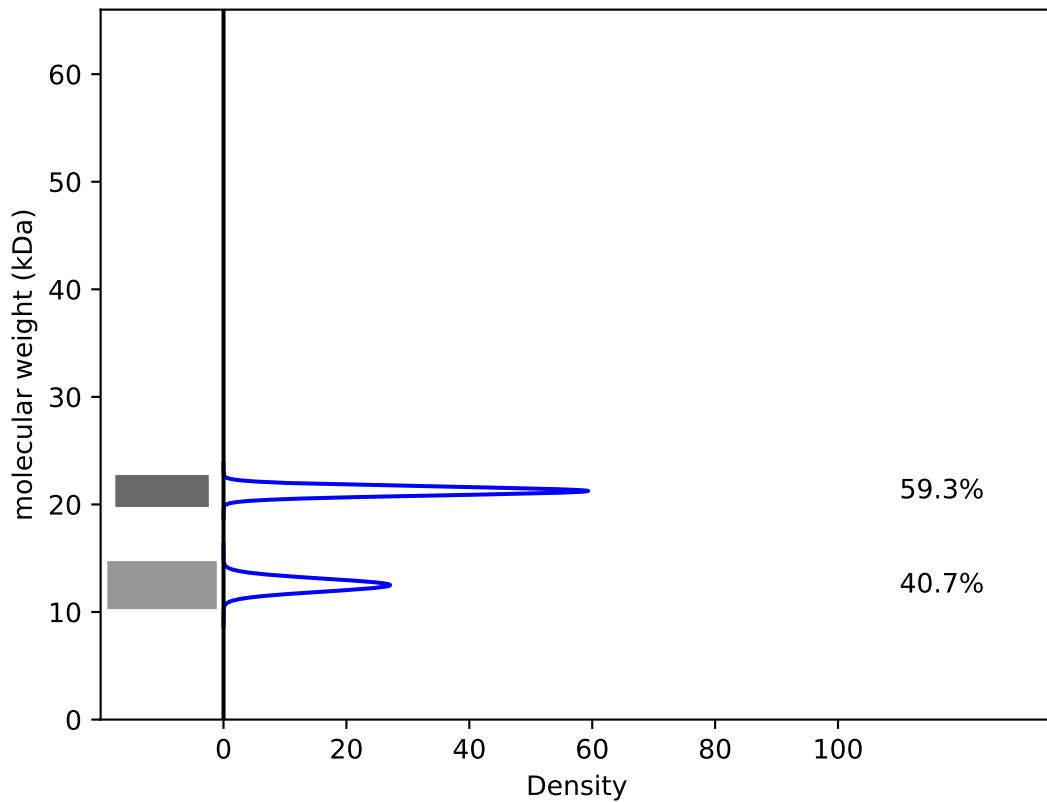

# Q56UQ5

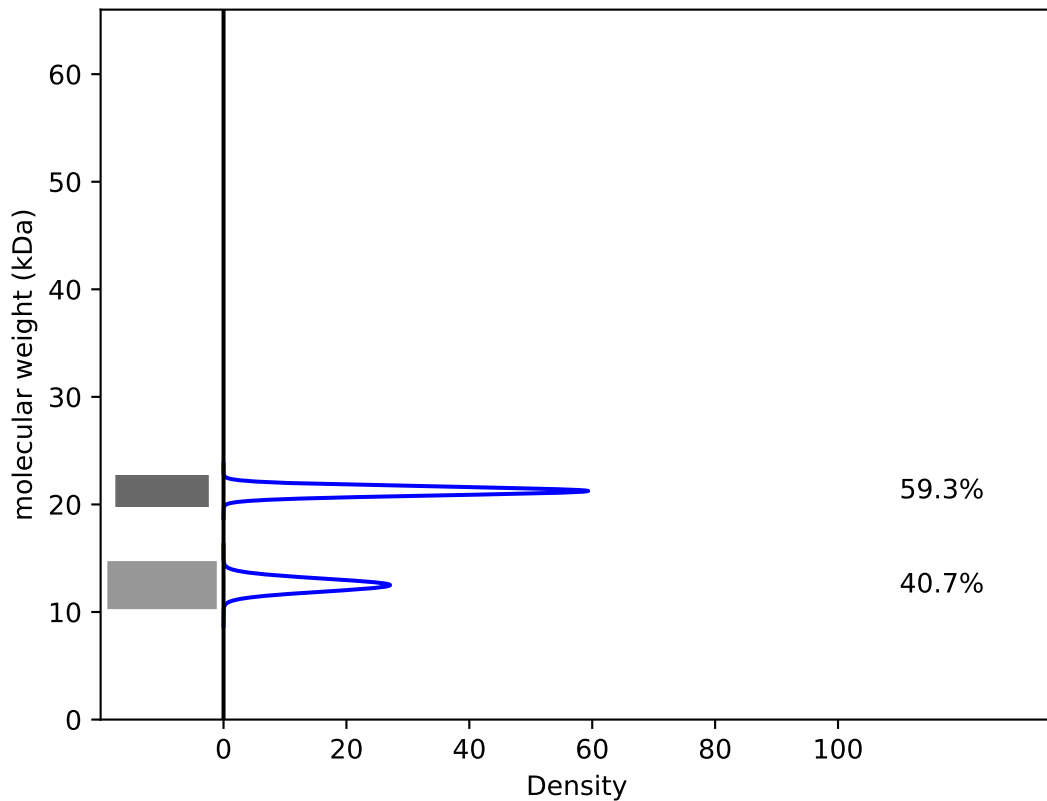

# P13861



# Q5VT79





# P13928



# P13984



# P13995



# P14174



# P14550



# P14618



# Q58FF3



P14635





# P63162



# P14678



# P14927



# P15104



# P15121



# C9JRZ8



# P15170



# P15531

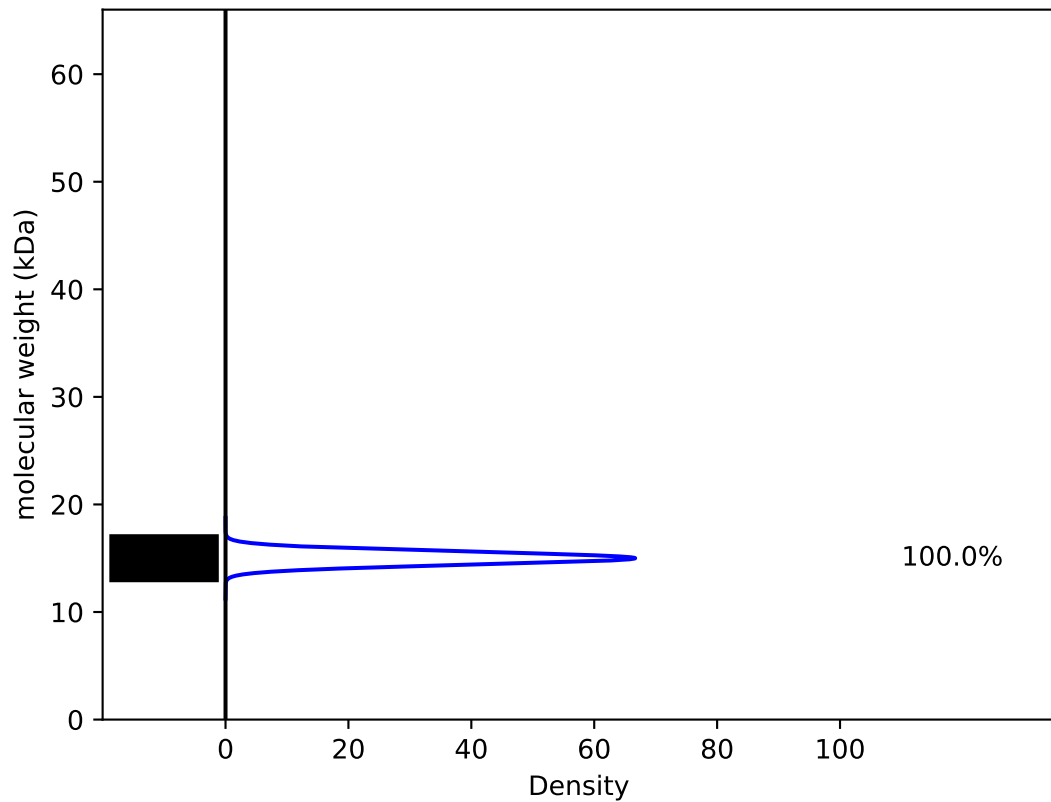



# P15880



# P15927



# P16152



P48741



# P17612



# P17980



P17987



# P18031

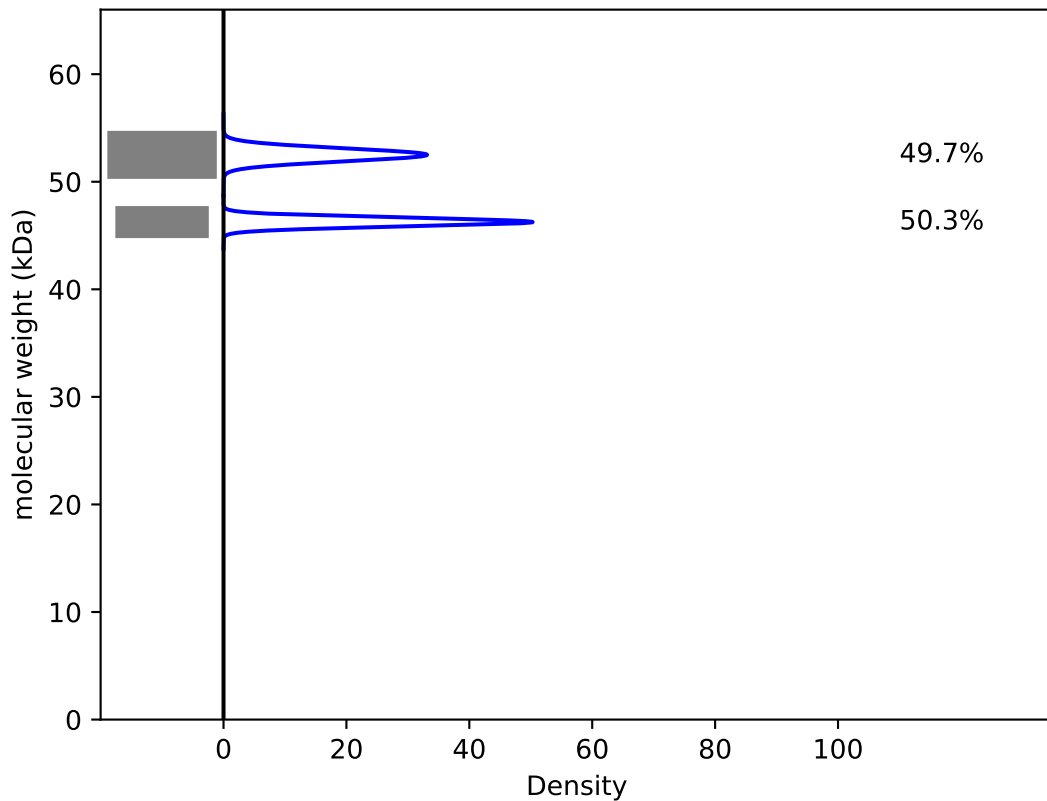



P18077



# P18085



# P18124



# P18621



# P18754



# P19387



P19623



# P19784





# P20338



# P20340



# Q9NRW1



# Q14964



# P46439



P21796



# P22061



P22087





P22392



O60361



P22626



# P22694



P23193



# Q15560



P23381



P23396





# Q16778



P33778



P23527



# Q8N257



P23528



# P23610



# P23919



P24534





P24666



P25325



P25398



P25685



# P25786



# P25787



# P25788



# P25789





P26368

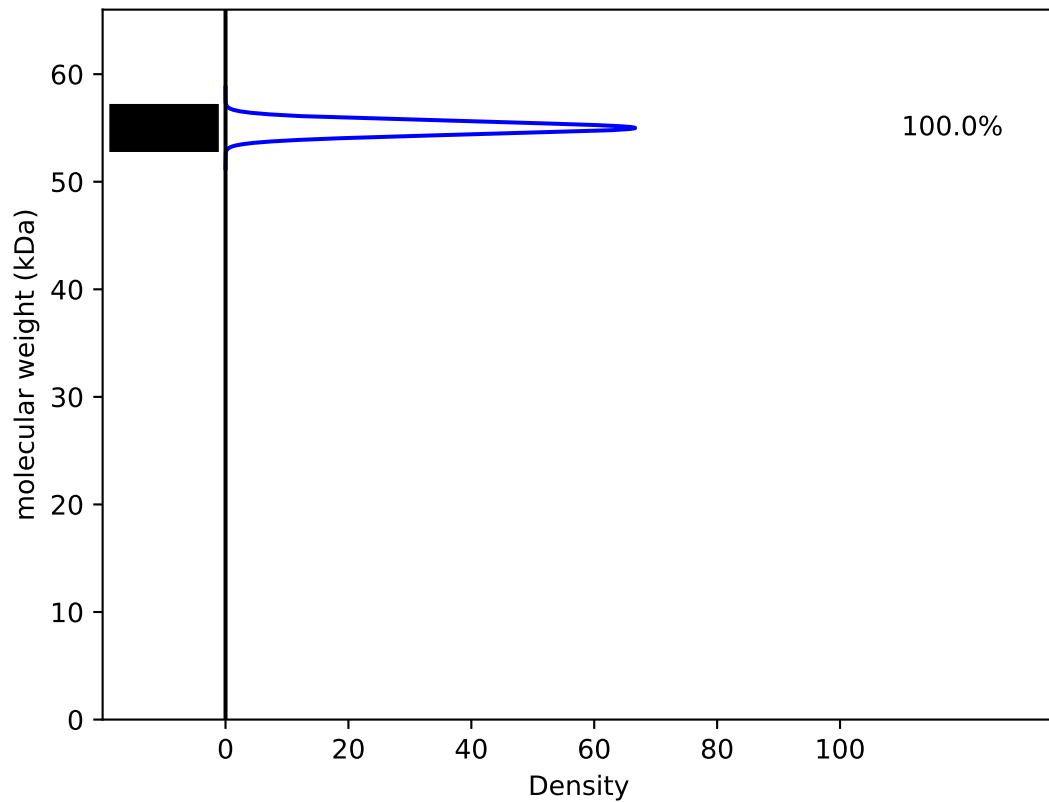

P26583



# P26885



P27144



P27348



P27361



P27635



# Q96L21





P27695



# P27797

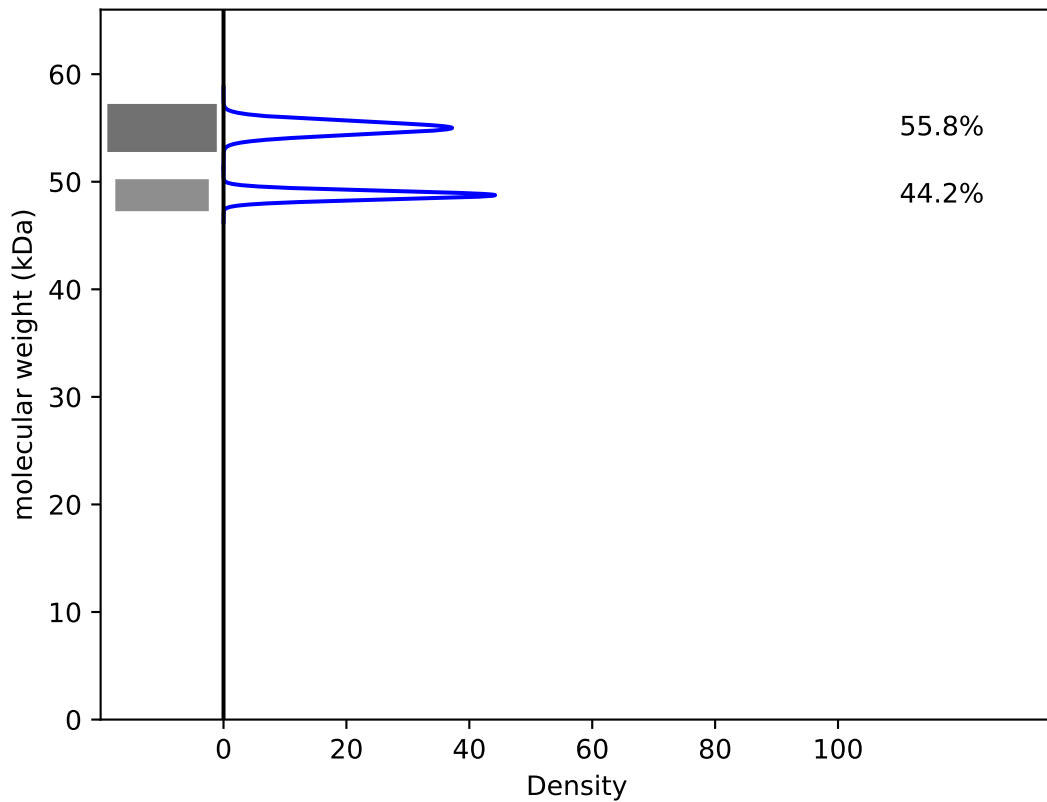

# P28066



P28072



# P28161



P28482



P29083



# P29218





P29372



P29373



P29762



# P29508



P29692



P30041



P30043



P30046





P30050



P30085



P30086



# P30101



# P30419



# O60551



P30519



P30533





P30740



O75830



# P31150

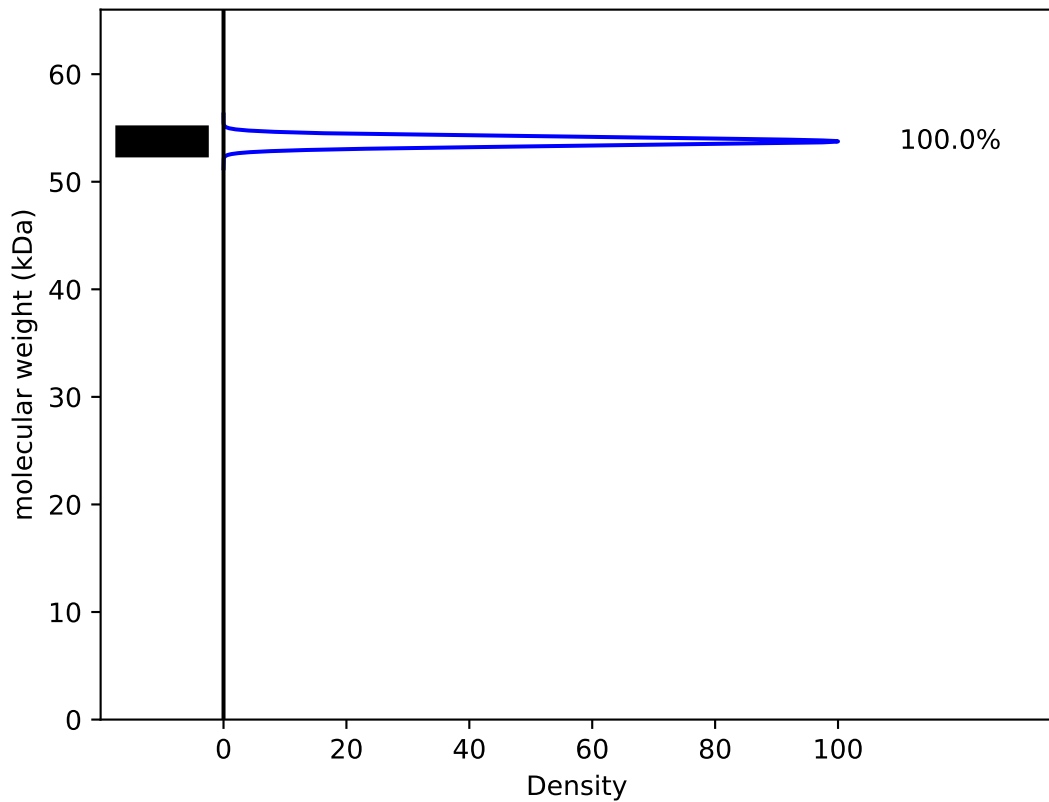

# P31153

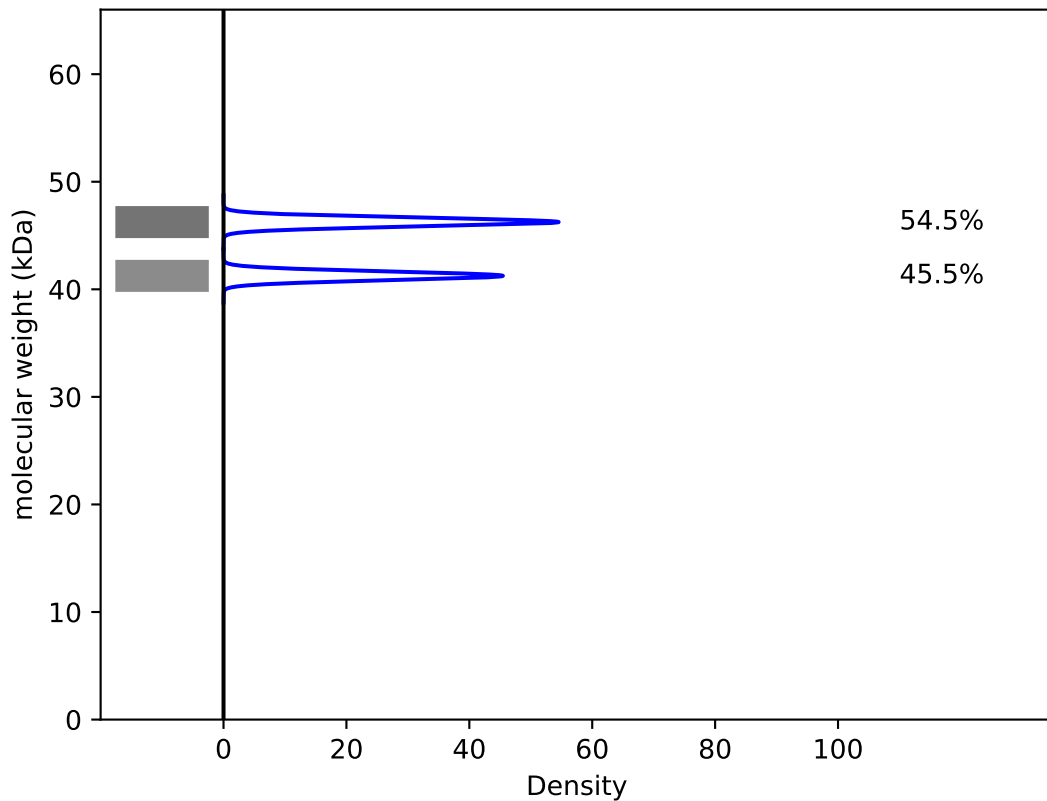

Q00266

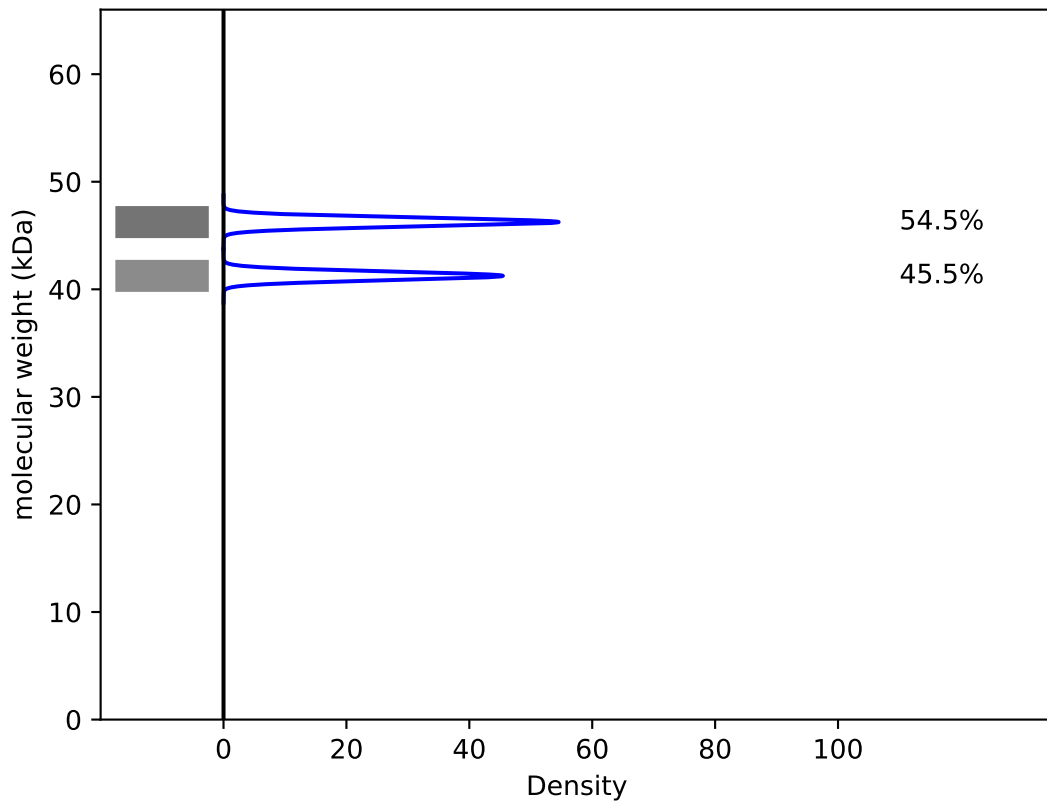

# P31350



P31483



# P31689





# P31942



# P31943



# P31946



# P32119



P32322



# P32969



# P33240



P35219





P35232



# P35237

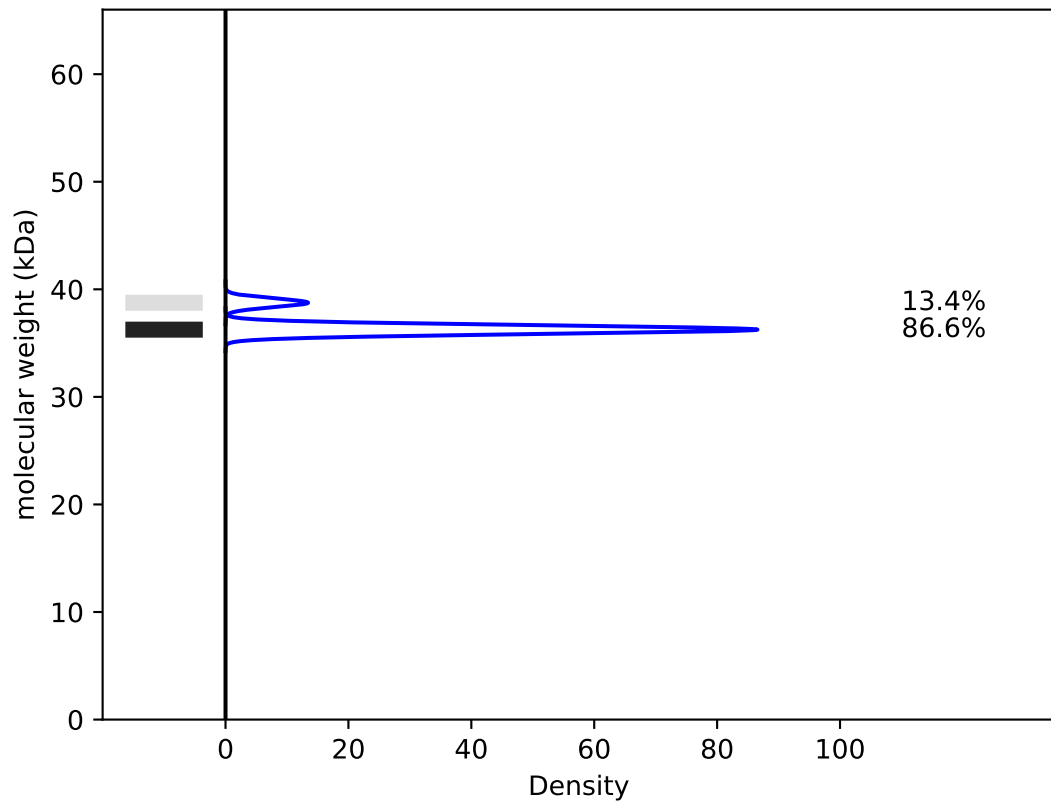

P35249



# P35250

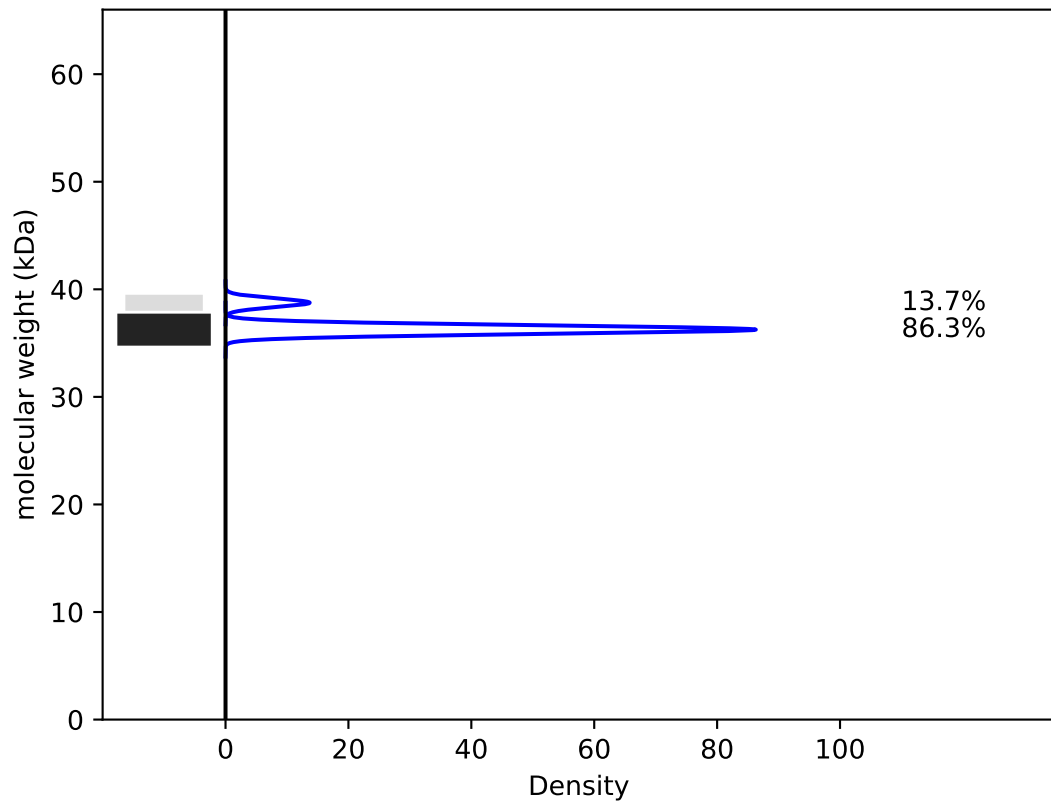

P35268



P35270



# P35613

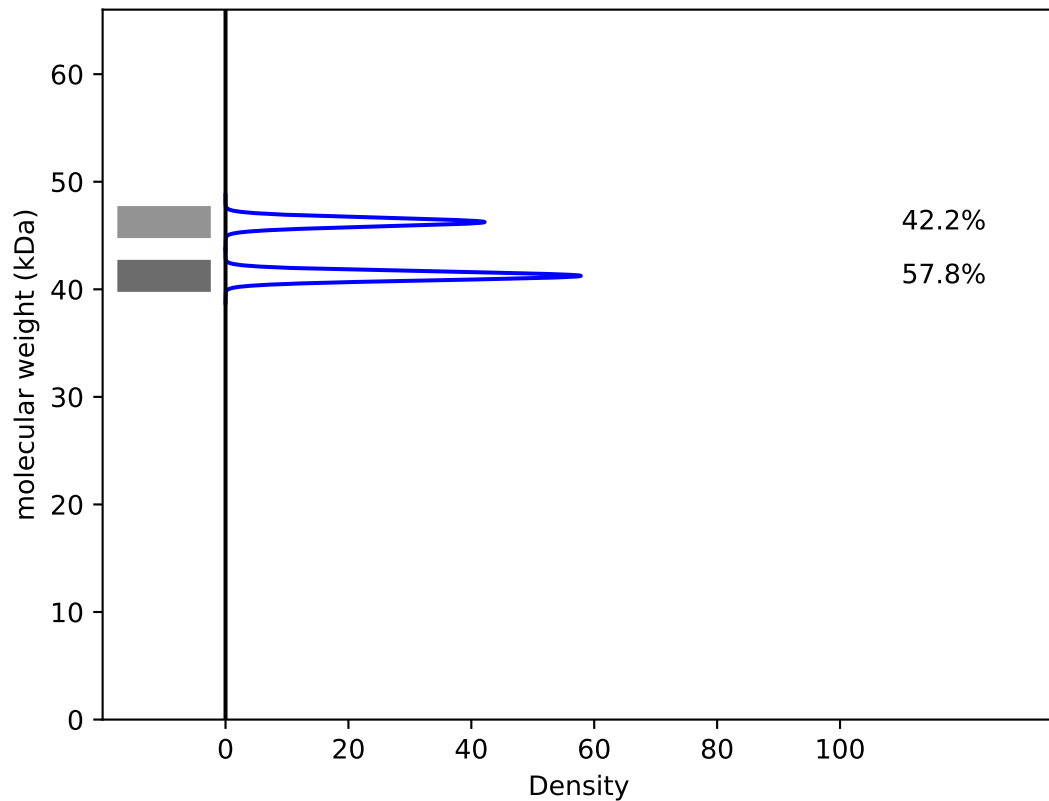

P35659





# P35998



P36404

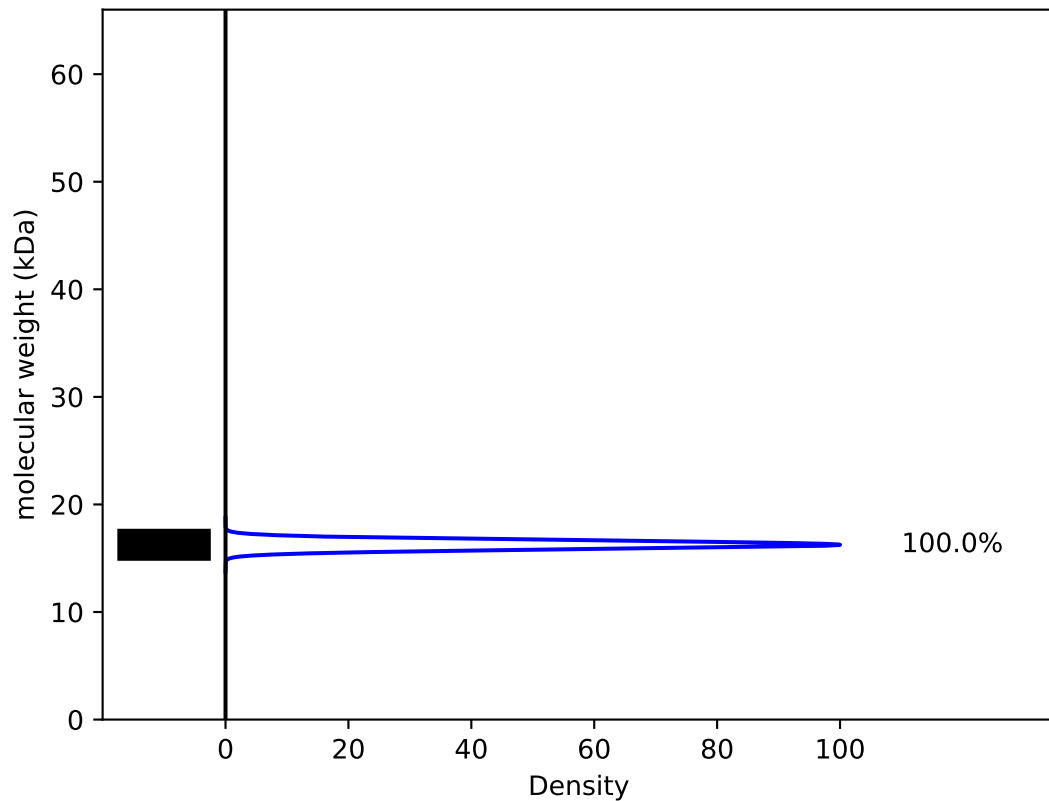

P36405



# P36507



P36542



P36543



# Q96A05



P36578





P36871



P36873



# P36952



P36957



P37108



# P37198



P37802



# Q9UI15





P37837



# P38117



# P38159



# Q96E39



O75526



# P38919



# P39019



P39023





Q92901



P39687



O43423



P39748



P40121



P40227

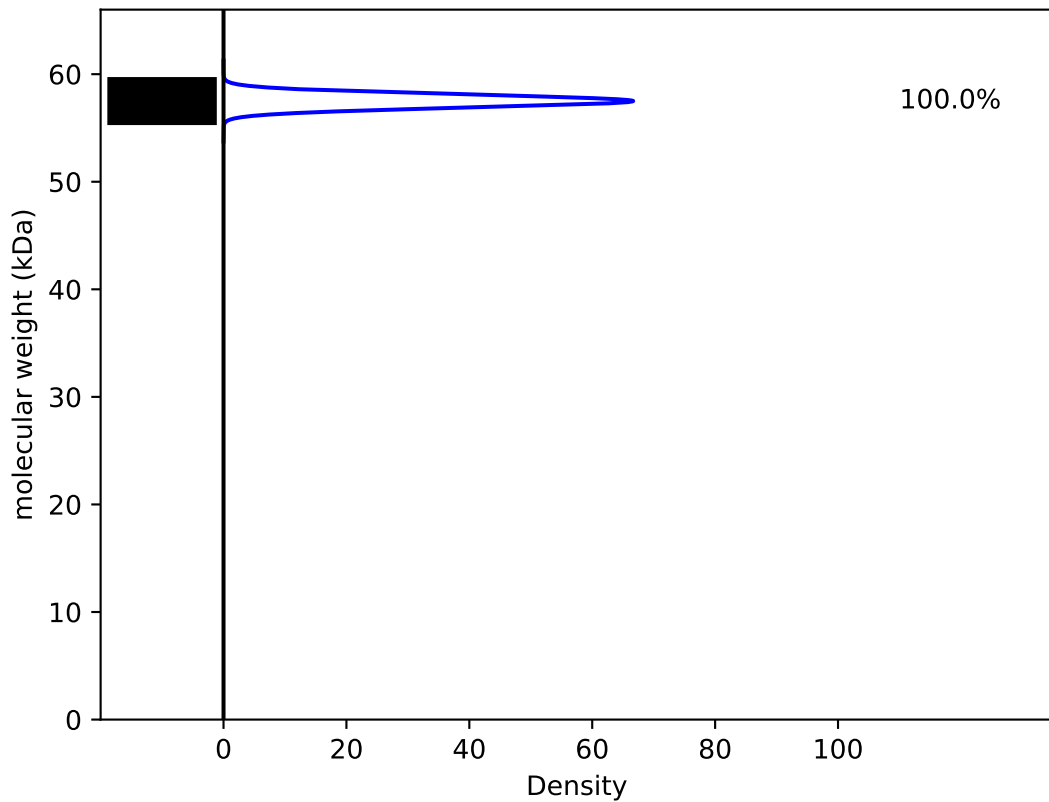

# P40429



# P40925





P40926



P40937



P40938



P41091



# Q2VIR3



P41223



P41227



# Q9BSU3





# P41240



# P41567



# P42167



P42677



P42765



P42771



P42772



P43034





P43307



P43487



# P43490

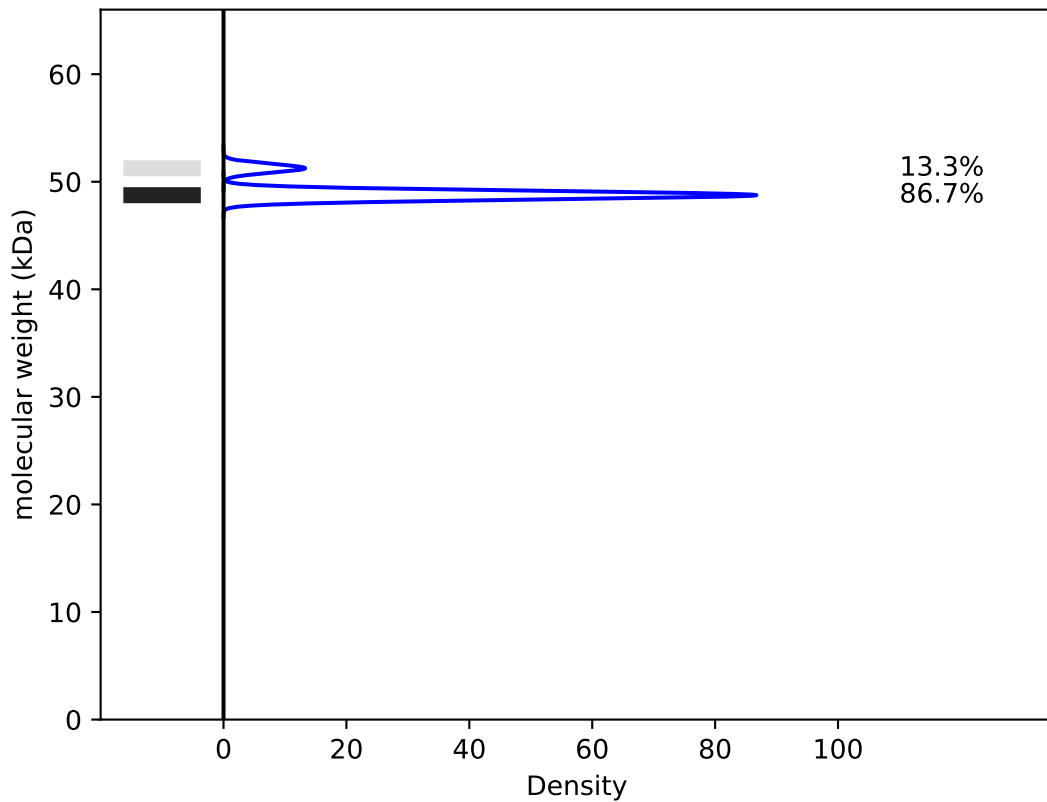

P43686



# P45880



# P46109



P46776



P46777





P46778



P46779

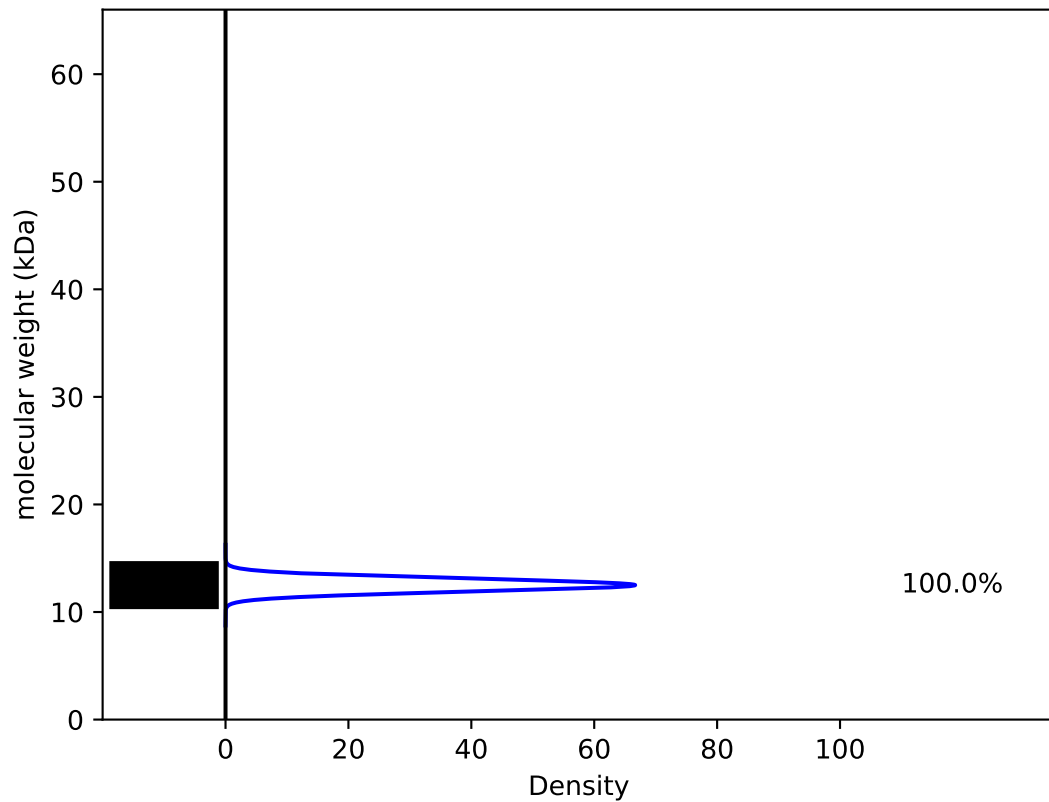

P46781



P46782



P46926



# Q8TDQ7



P47755



P47756





# P47914

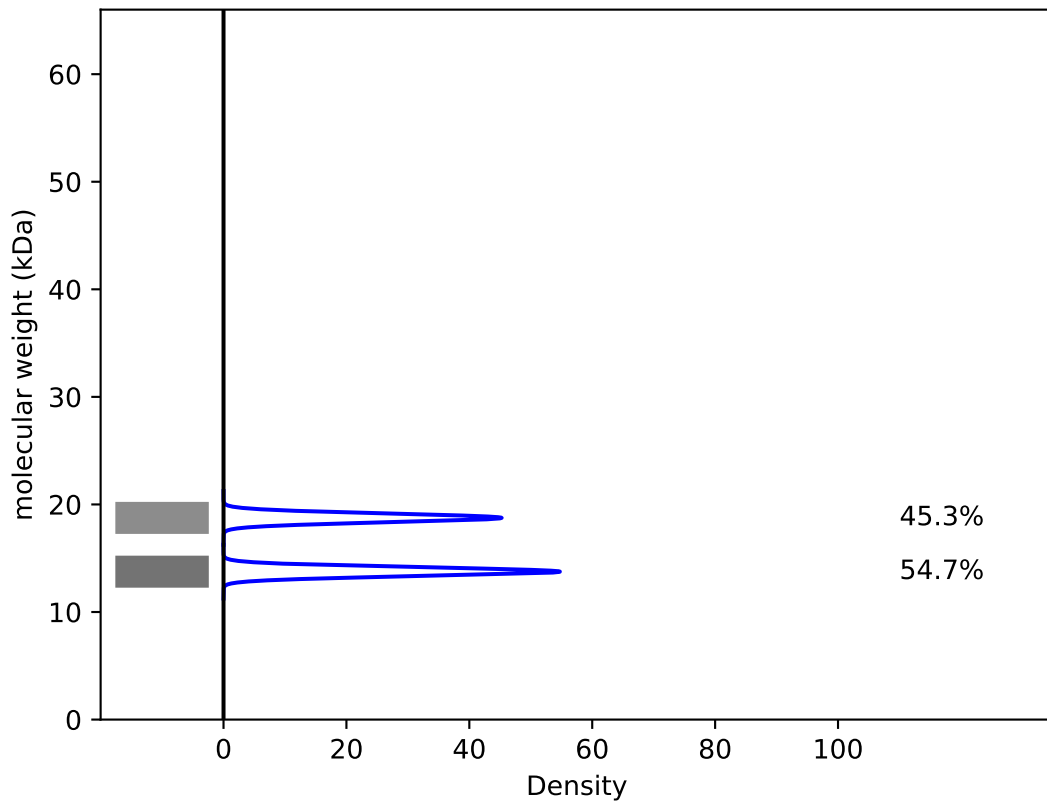

P48047



P48444



P48507



P48594



P48643



P48723



P48739





# P49005

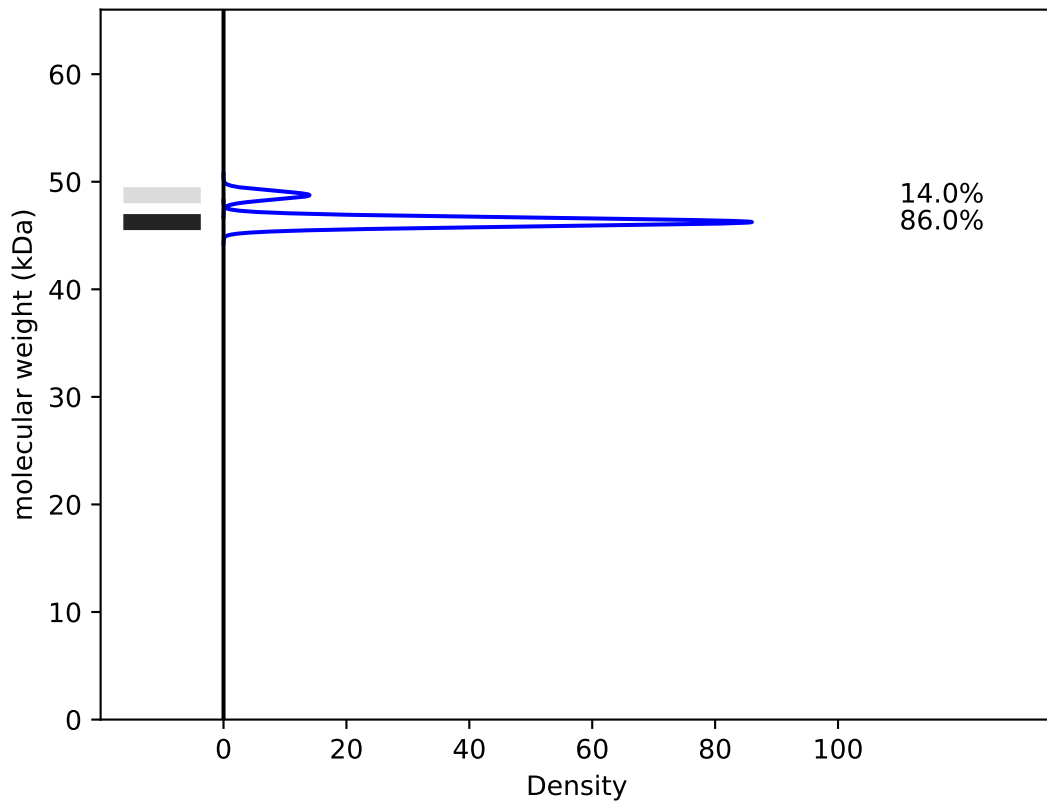

P49207



# P49368

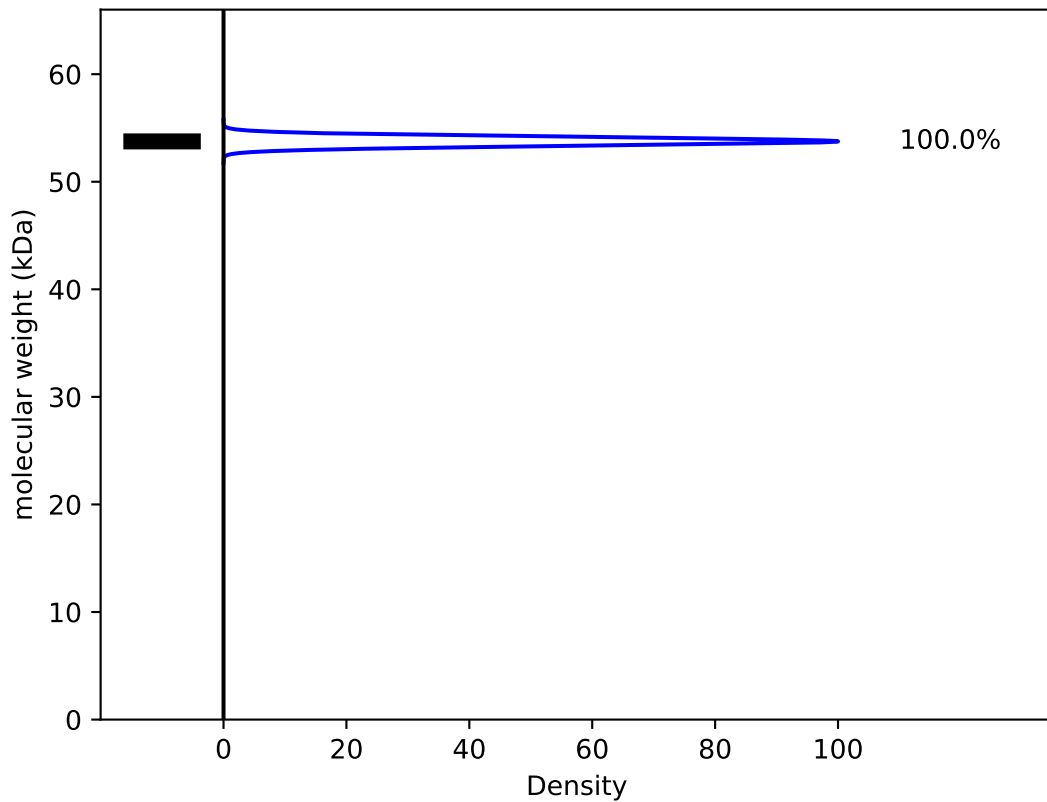

P49407



# P49458



# P49585



Q9Y5K3



# P49593





P49642



# P49720



P49721



# P49770



P49773



P49821



# P49840



# P49903





# P50213



# P50336



# P50395

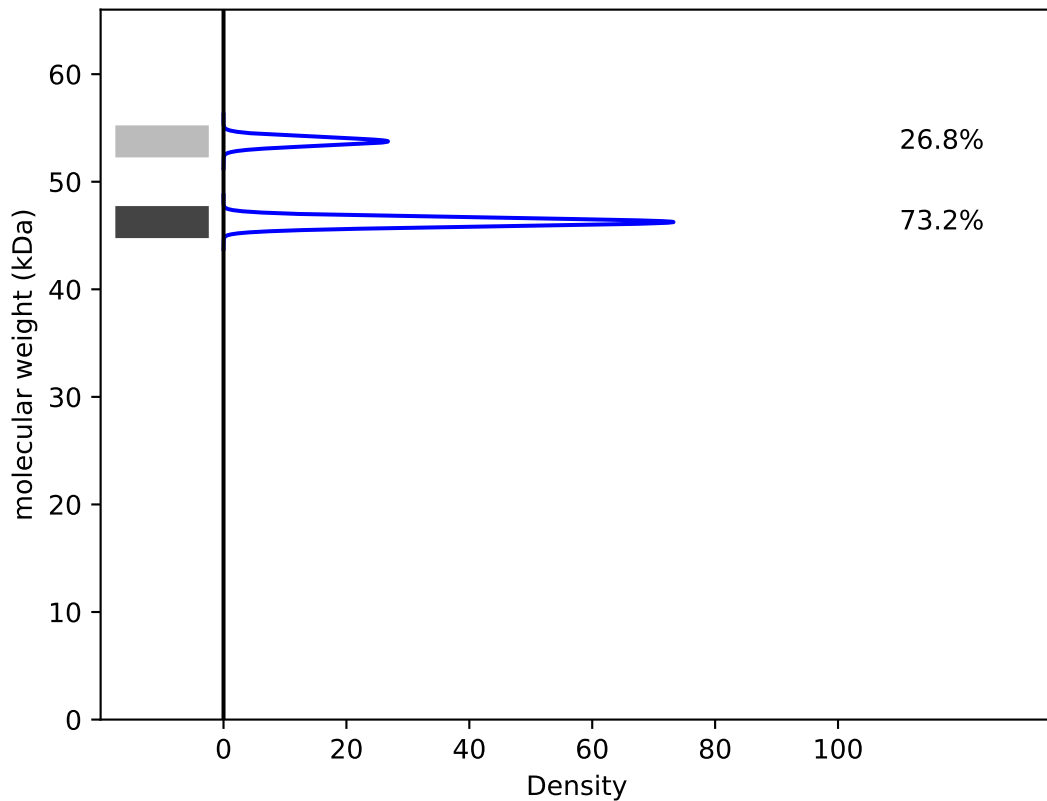

P50402



# P50453



# P50454



# P50502



# P50552





P50897



# P50914



P50991

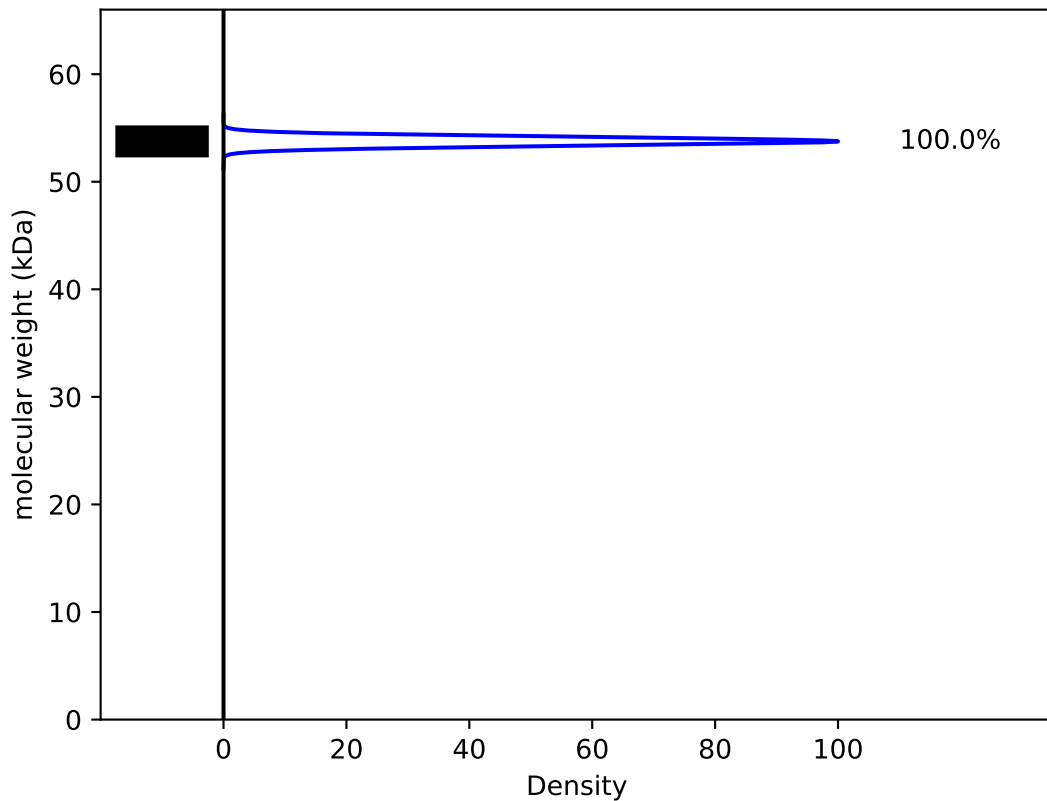

# P50995



# P51148

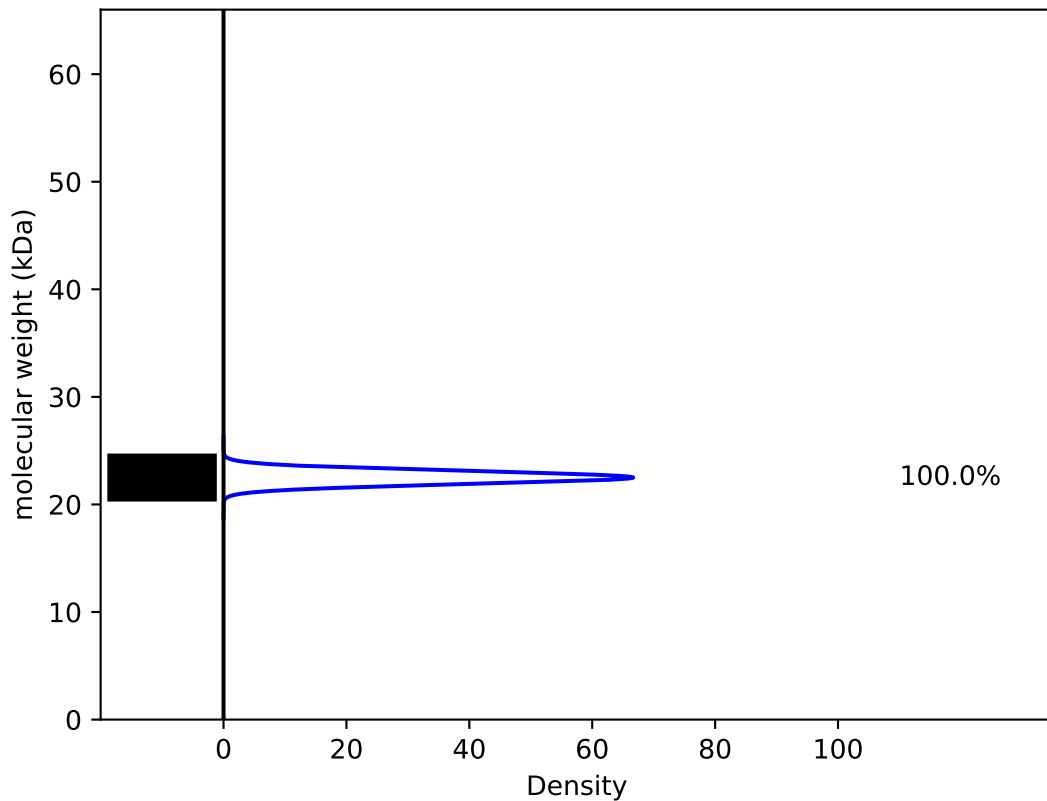

# P51149



# P51151



# Q9NP90





# P51153



# P51452



# P51570



P51572



# P51648



P48448



P30838



P43353





# P51665



# P51809



# P51858

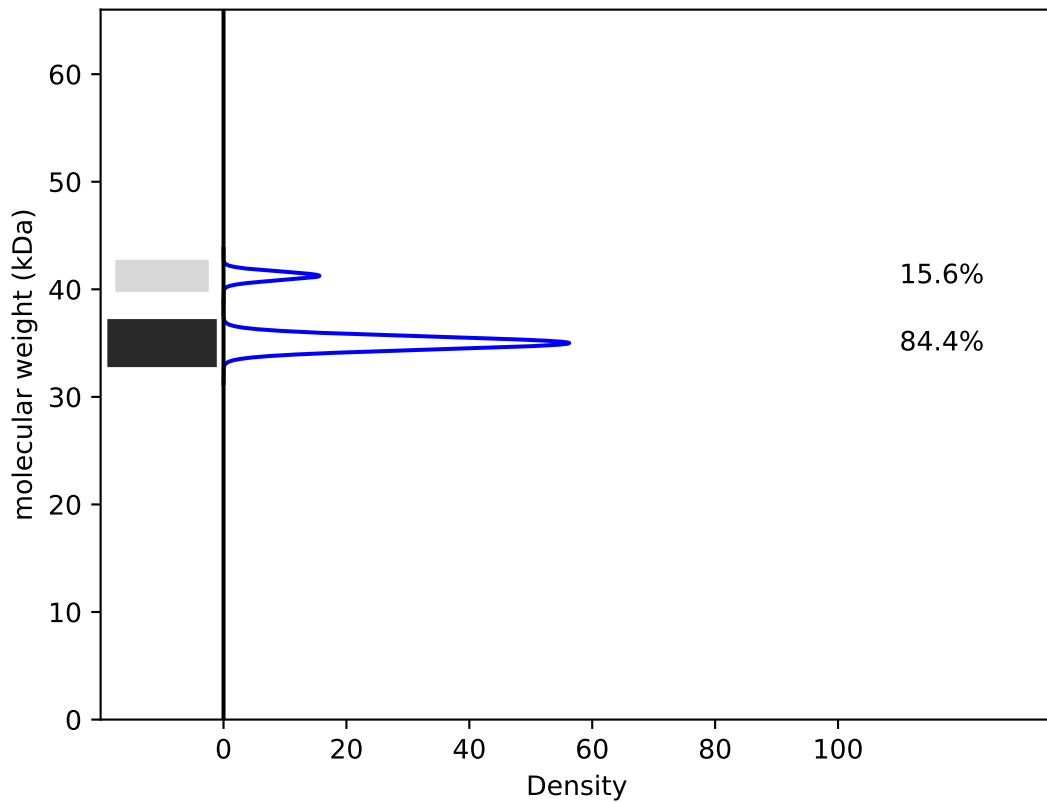

# P51970



# P51991



P52292



P52294



P52434





# P52565



# P52597



# P52815



P52907



P53004



P53041



# P53365



# P53367





# P53582



P53701



# P53990



# P53999

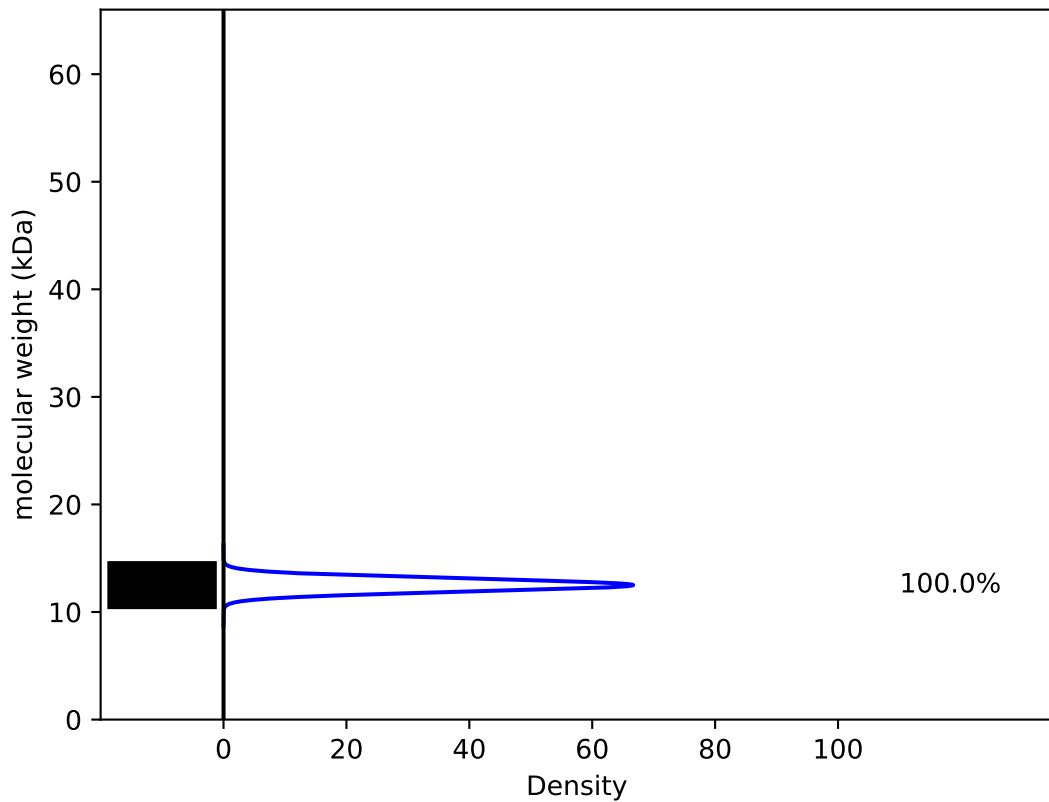

# P54577



# P54578



# P54619



# P54709

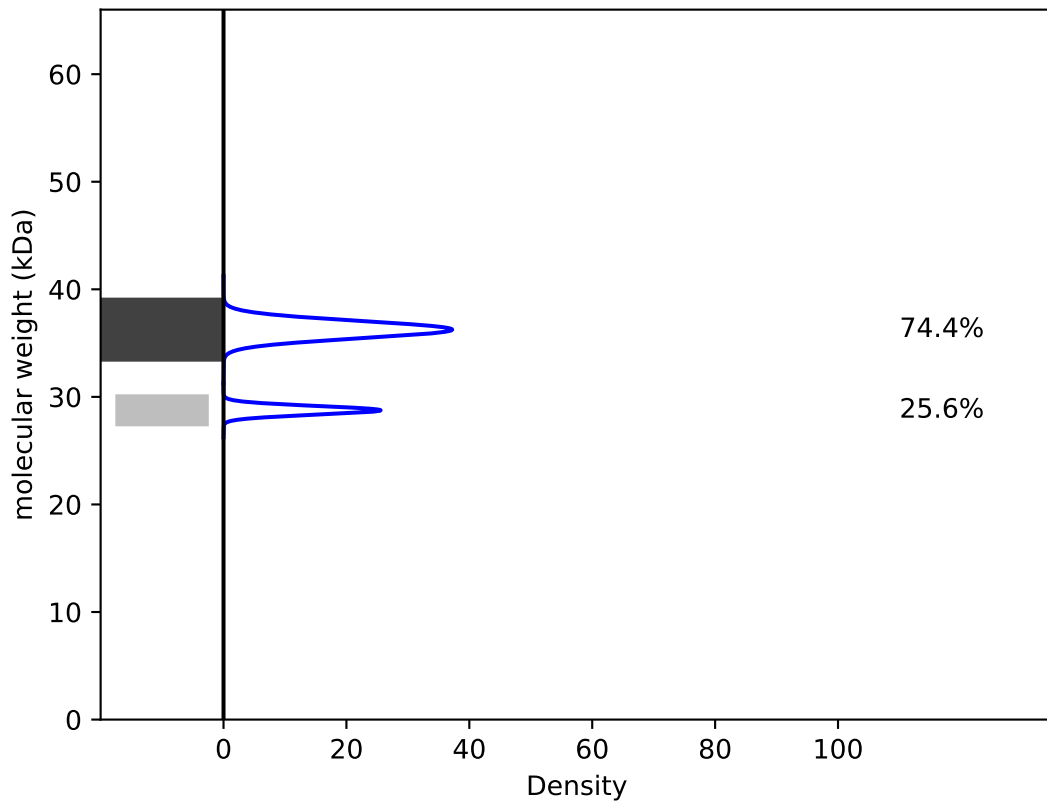



P54727

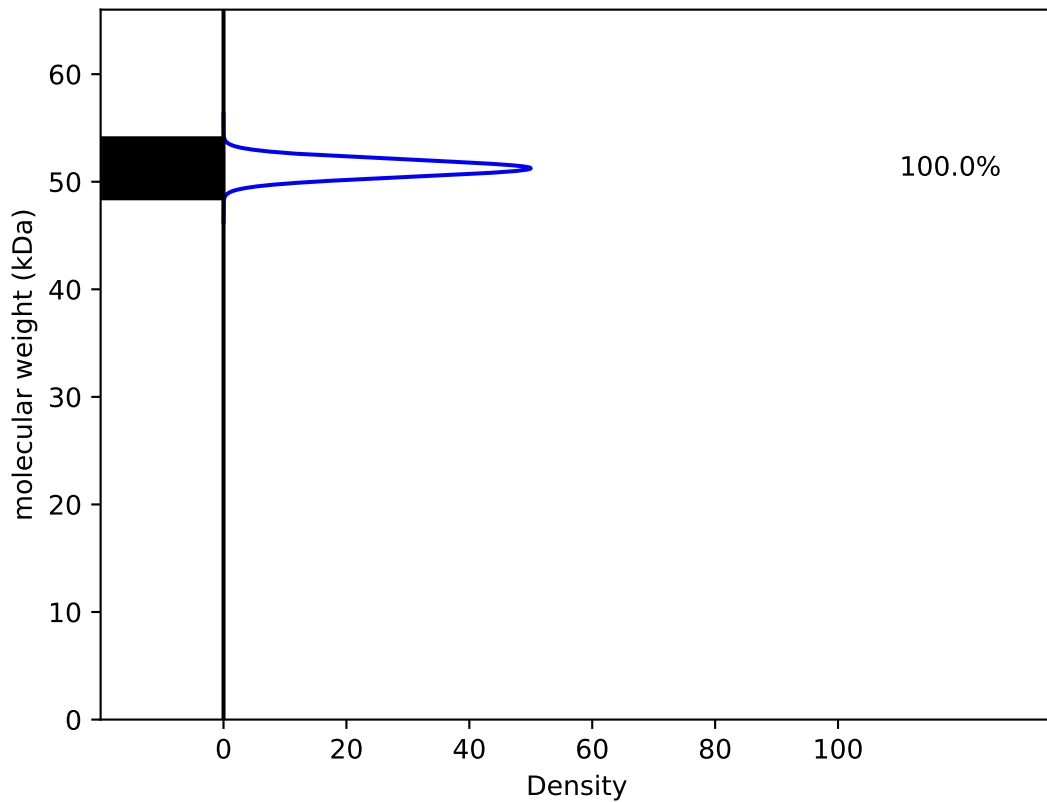

# P54819



# P54920

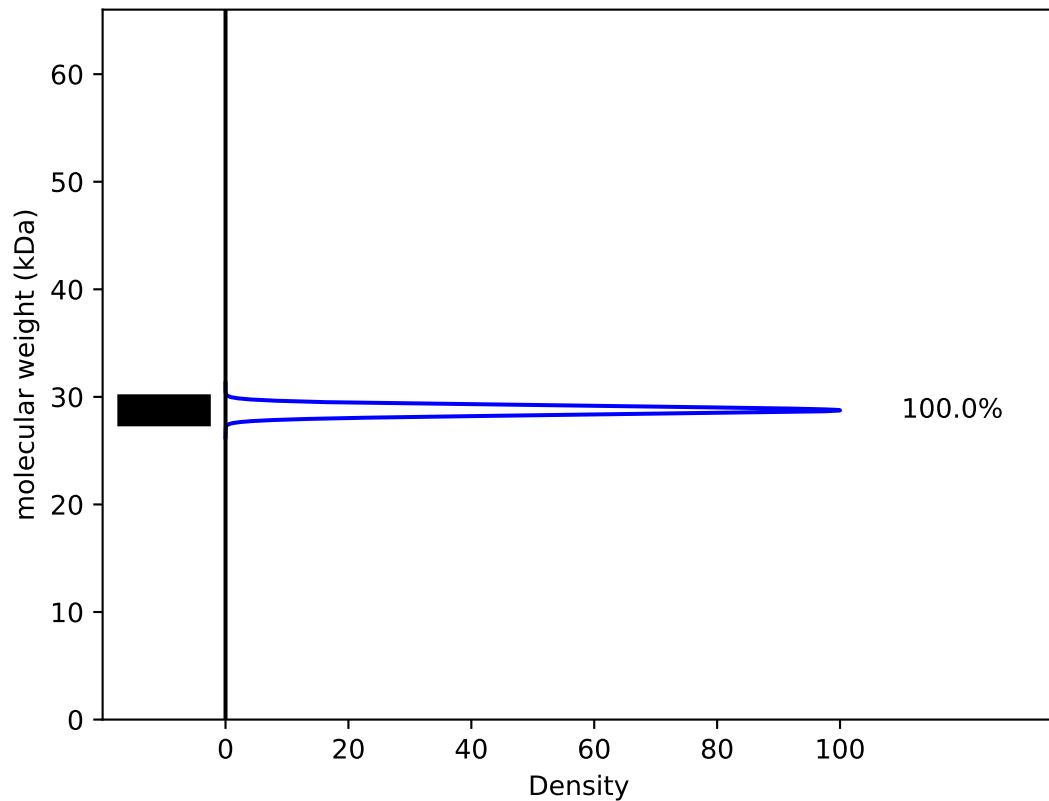

# Q9H115



P55010



P55036



# P55039



# P55209

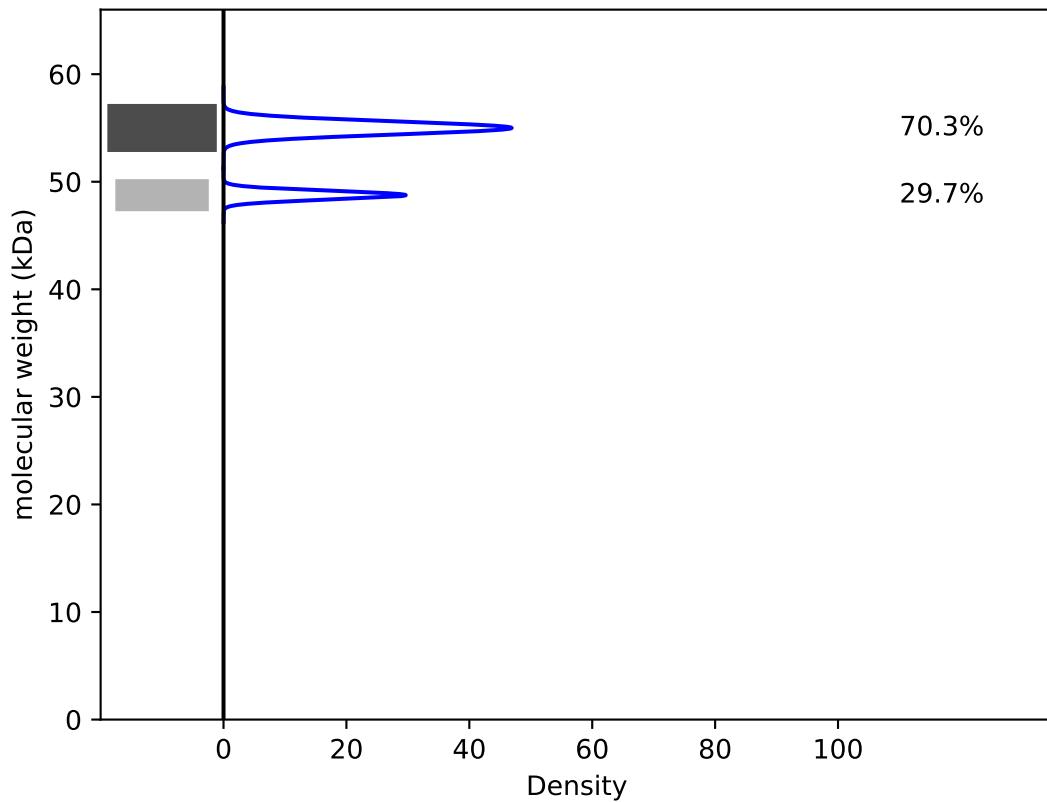



# P55210



P55263



# P55327



P55735



# P55769



# P55795



# P55809



# P55957





# P56134



# P56182



# P56537



# P56545

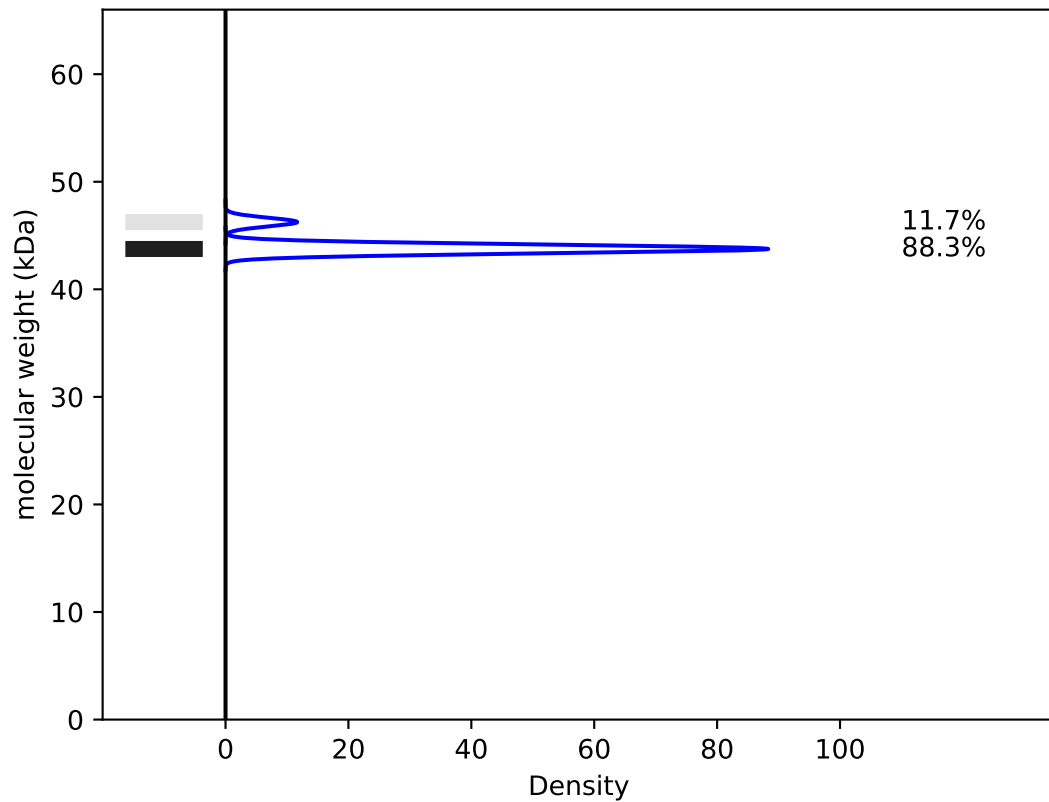

# P56556



# P57105



Q99879



Q99877





Q93079



# Q5QNW6



# P62807



# P58876



Q99880



# P59998



# P60468



# P60709





# Q9BYX7



P60842



# P60866



P60891



# P60900



# P60953



# P17081



# P60981





# P60983



O60234



# P61009



# P61019



# P61020



# P61026

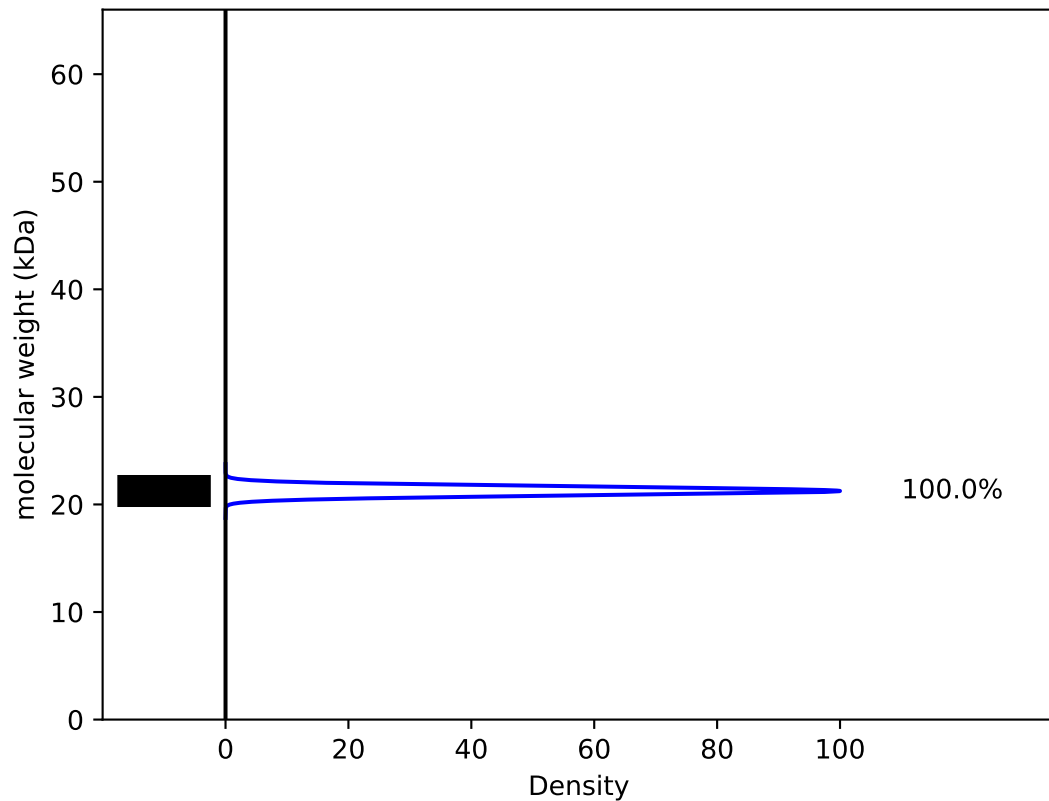

# P61081



# P61086





# P61106



# P61158



# Q9P1U1



# P61163



P62834



# P61224



# A6NIZ1



# P61225





# Q9Y3L5



# P10114



# P61247



P61254



# P61289



# P61313



# P61353



# P61513





# A6NKH3



# P61586



# P61604



# P61758



# P61769



# P61916



# P61923



# P61956





# Q6EEV6



P55854



# P61962



# P61964



# P61978

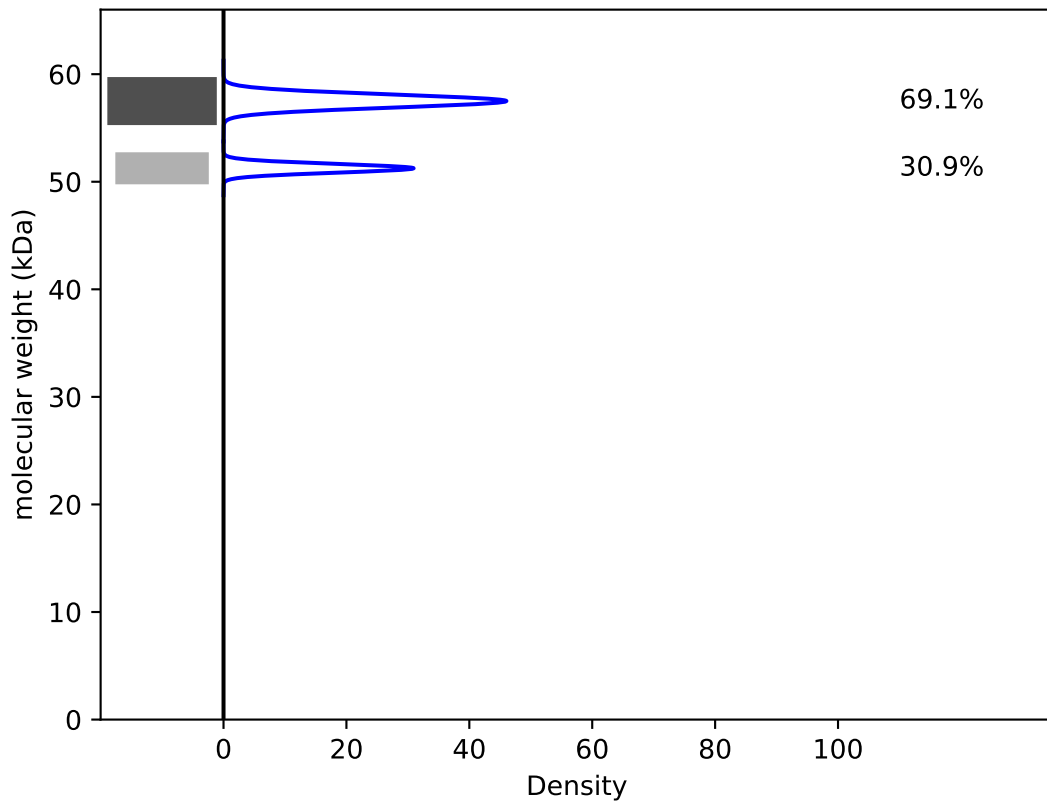

# P61981



# P62081



P62136





# P62140



P62191

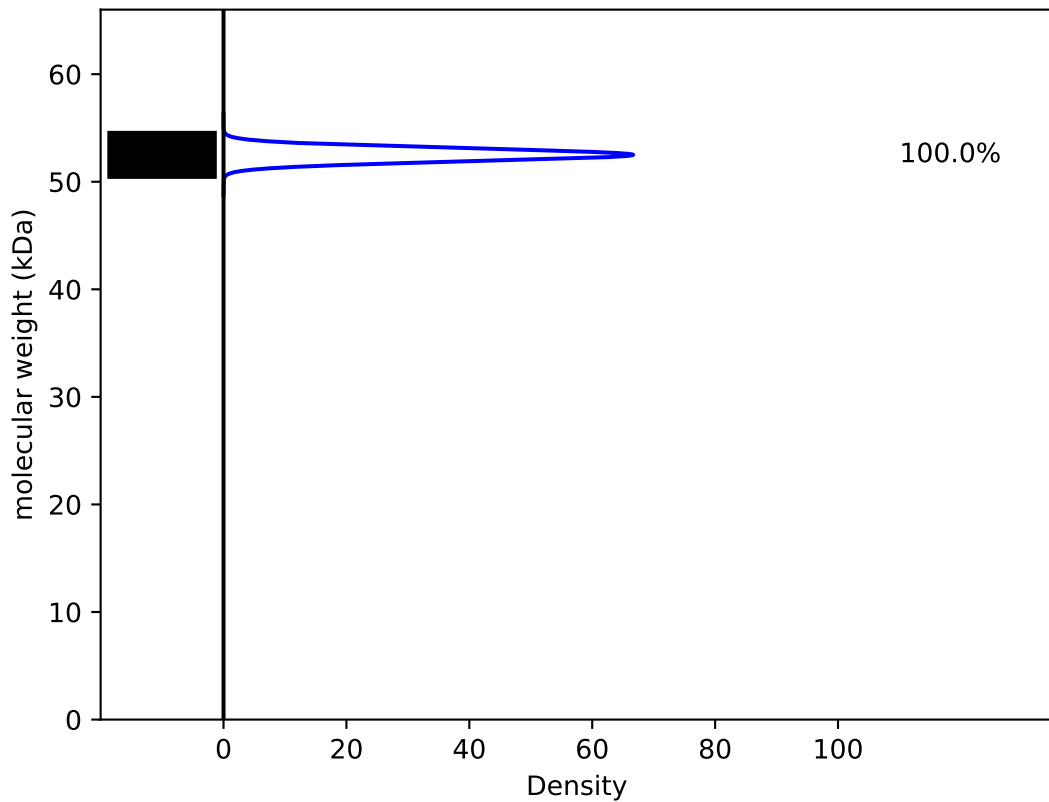

# P62195



P62241



# P62244



P62258



# P62266

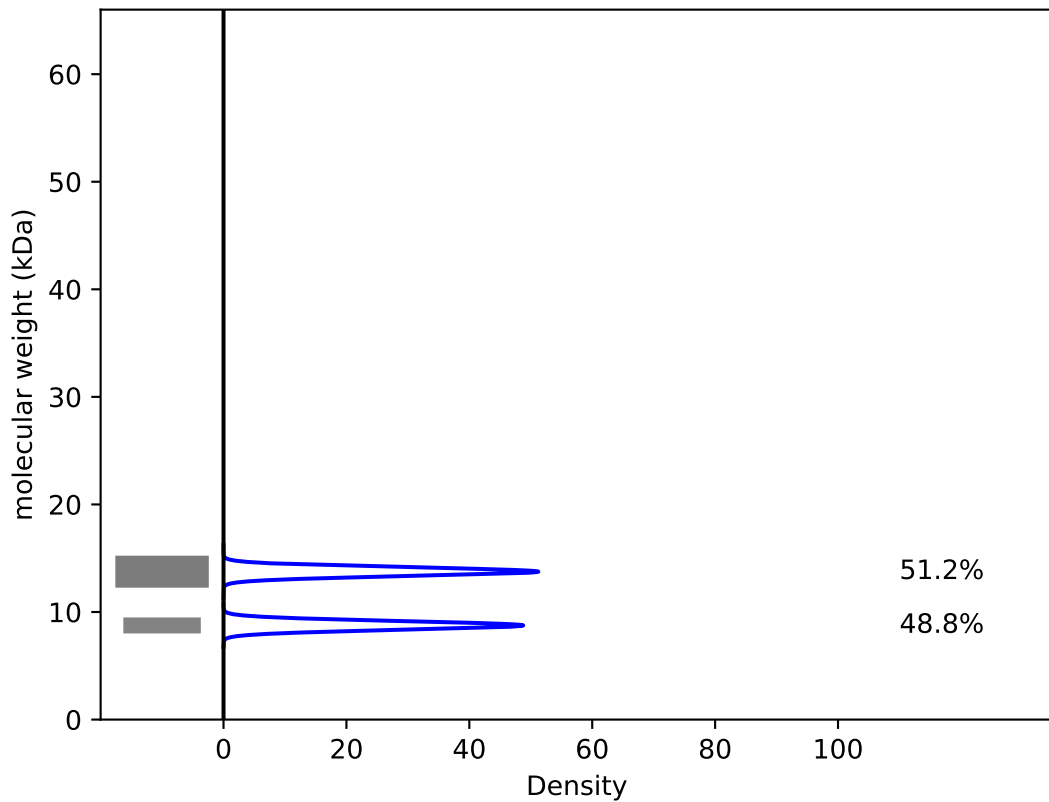

# P62269





P62277



# P62280

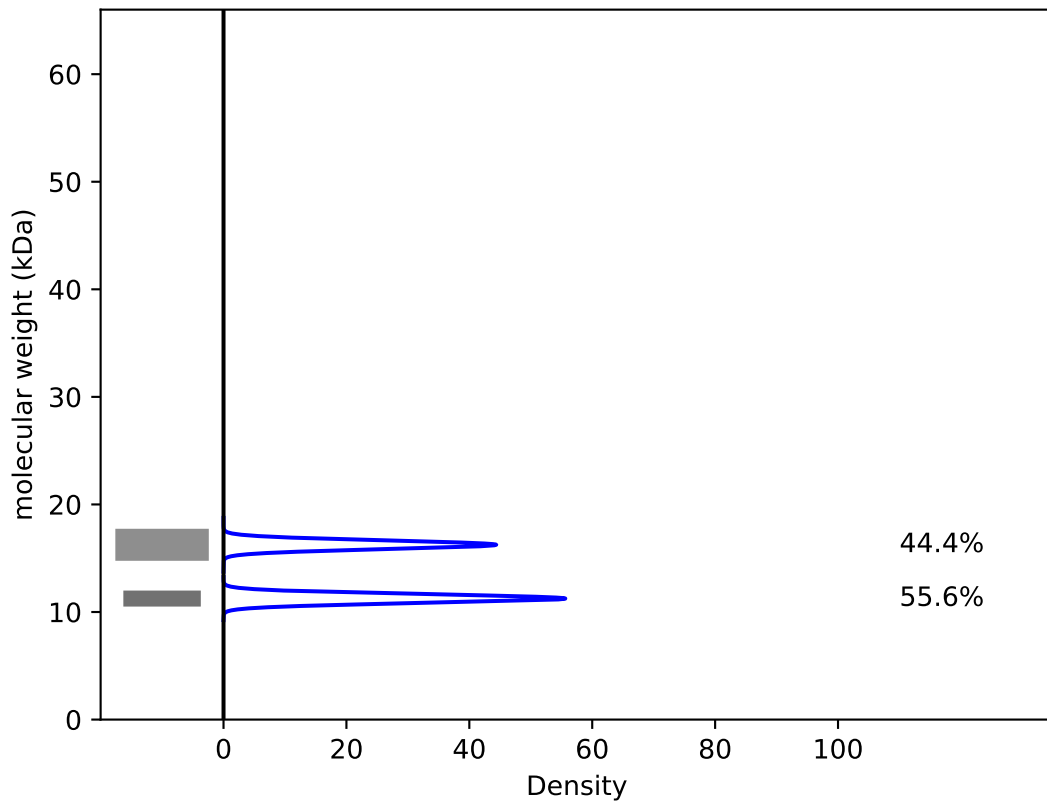

# P62306



# P62314



# P62316



# P62318



P62495



# P62699





# P62701



# Q8TD47



# P22090



# P62750

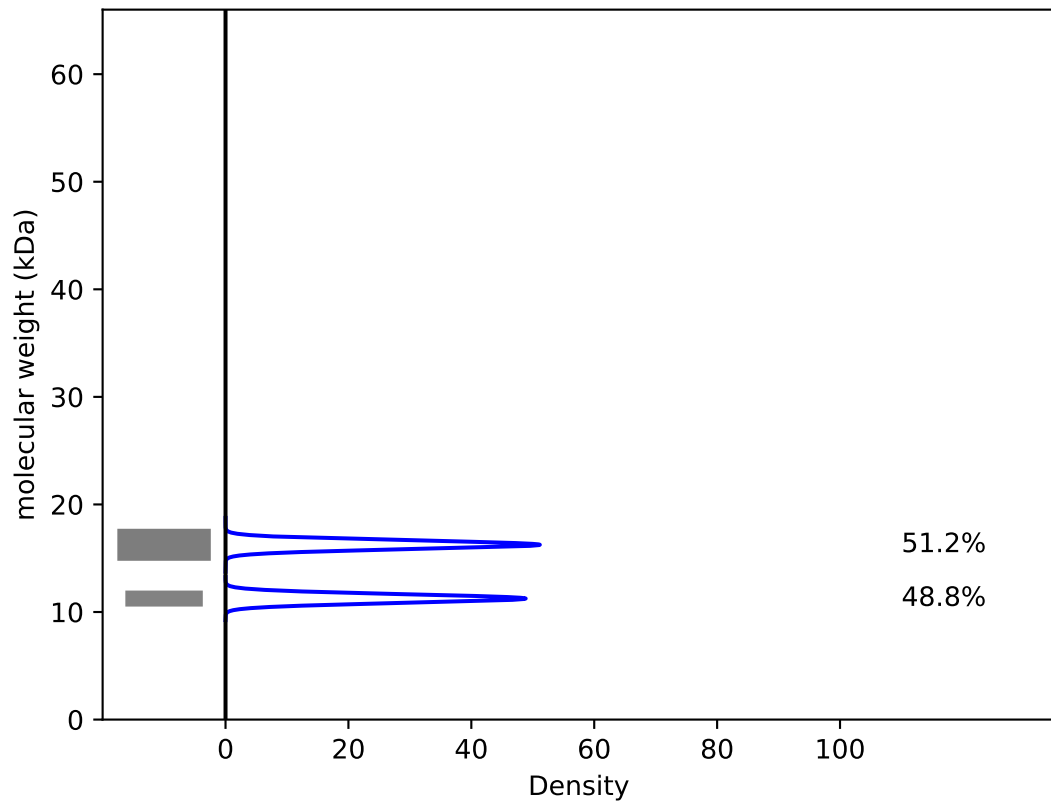

P62753



# P62805



# P62820



P62826





# P62829



P62847



P62851

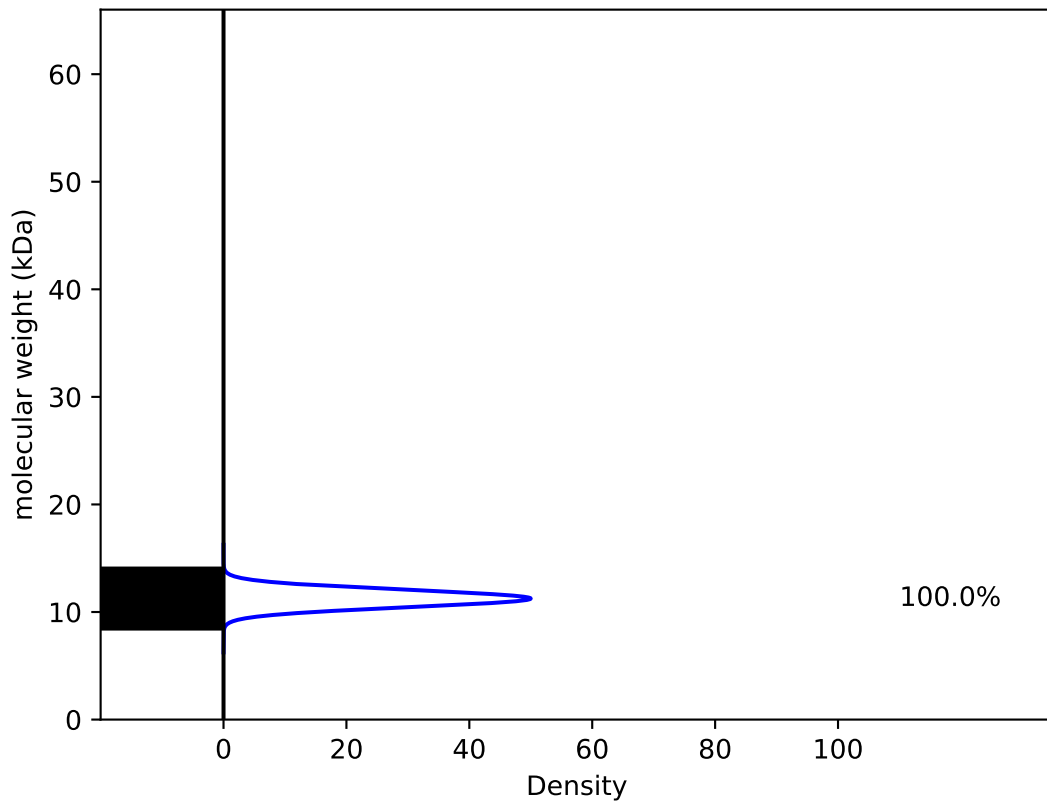

P62854



# Q5JNZ5



P62857



# P62888



# P62899





# P62906



# P62910



P62913



P62917



P62937



# Q9Y536



# PODN26



# F5H284





A0A0B4J2A2



A0A075B759



# PODN37



P62942



# P62993



P62995



# P63000



# P60763





# P15153



# P63092



P63104



# P63151



# Q66LE6



Q00005



Q9Y2T4



# P63167

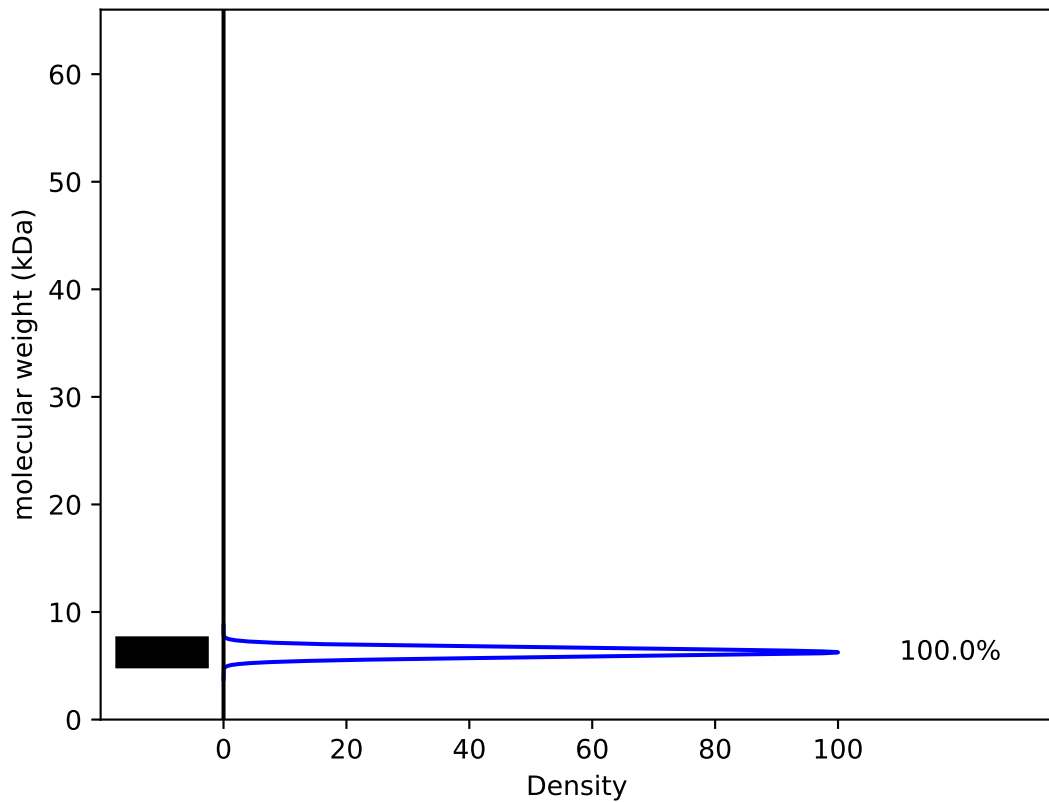



# Q96FJ2



# P63172



# P63173



P63241



# Q6IS14



# Q9GZV4



P63261



P63279





P67775



P62714



# P67809

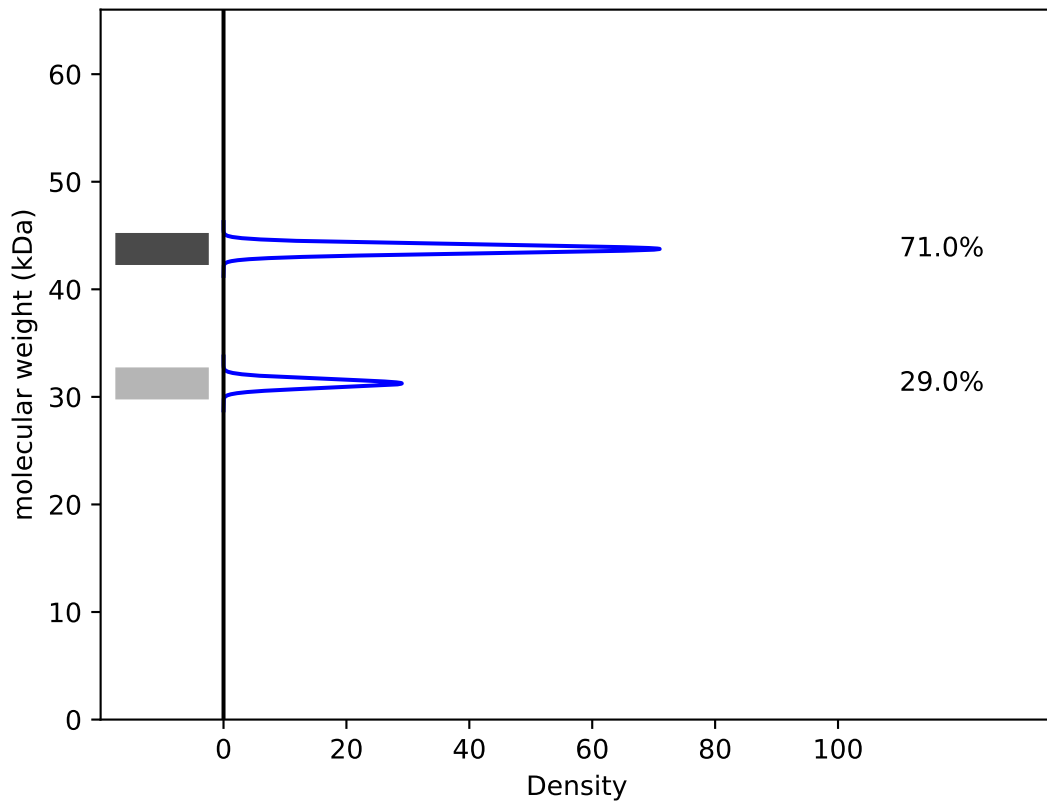

P67870



# P68133



P68032



P63267



P62736





# P68036



P68104



# Q5VTE0



P68363



# A6NHL2



P68366



P68371



# P68400





# Q8NEV1



P68402



P68431



# Q16695



# Q6NXT2



# P78330



P78406



P78417





# P78540



# P80303



P82673



P82930



P82979



P83731



P83881



# Q969Q0





P84077



# P61204



P84085



# P84090



P84098



P84103



P84243



# P98179





# P99999



Q00013



Q00169



Q00534



Q00535



Q00577



Q00688



Q00796





# Q01085



# Q01105

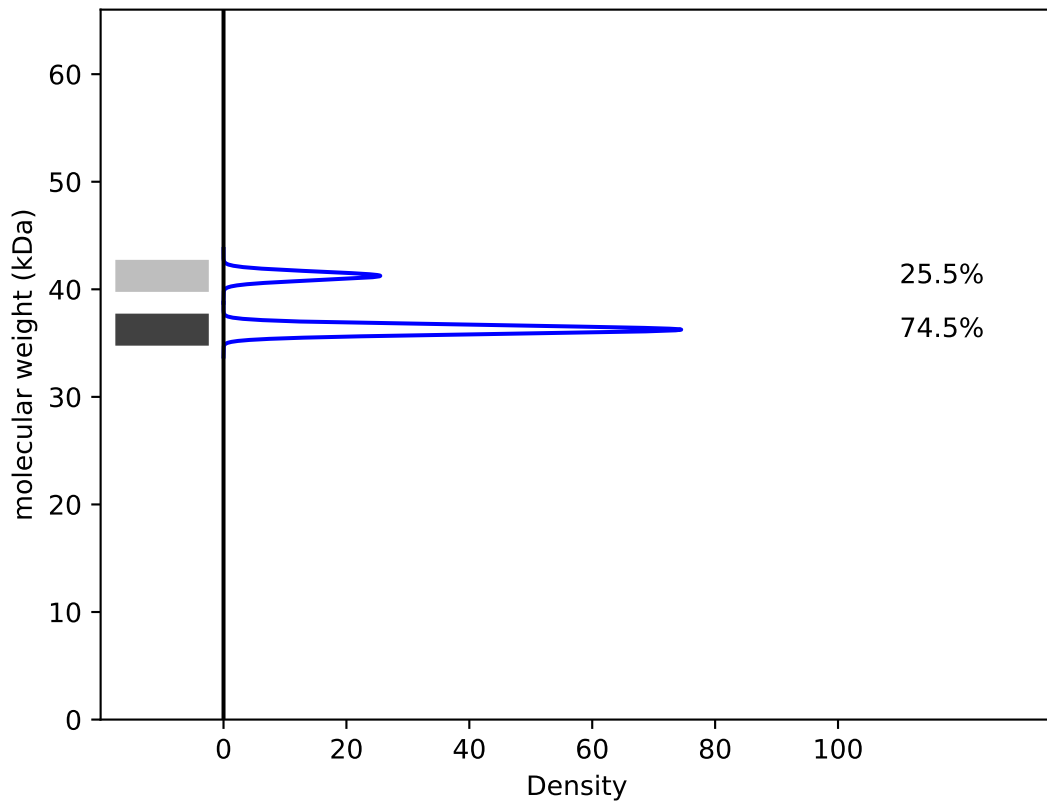

# PODME0



Q01130



# Q9BRL6



Q01469



# A8MUU1



# Q01518





# P40123



# Q01581



Q02127

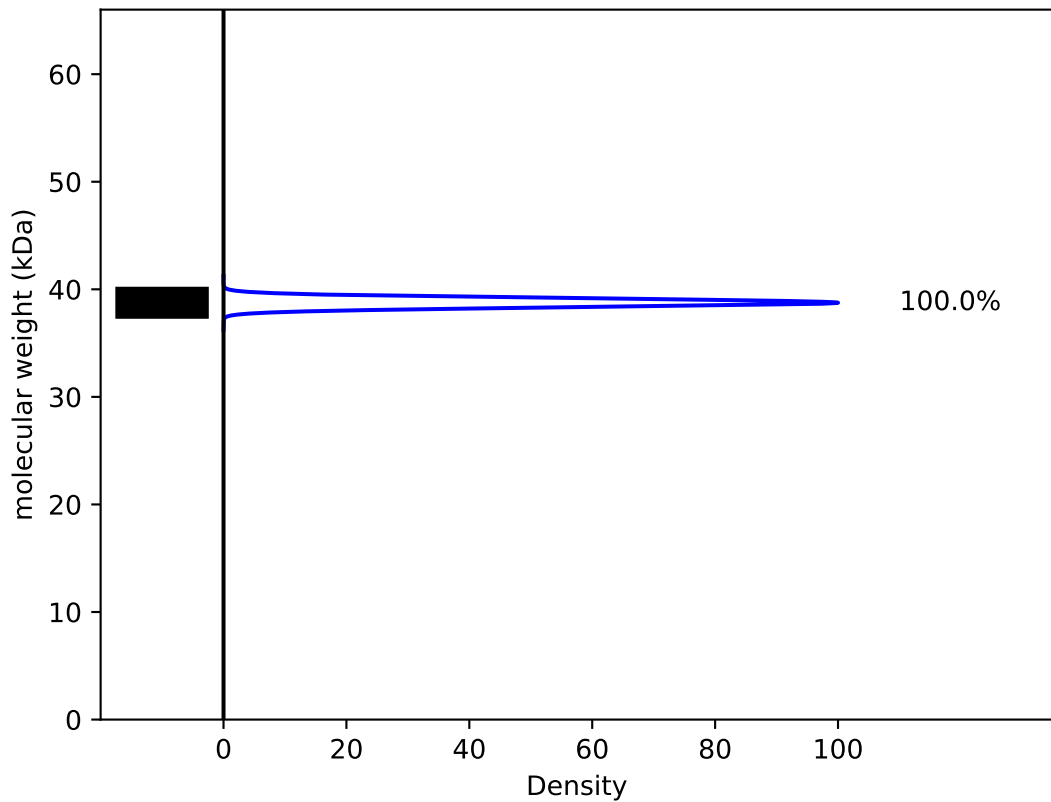

Q02543



Q02750



Q02790



Q02878



# Q8NEG2

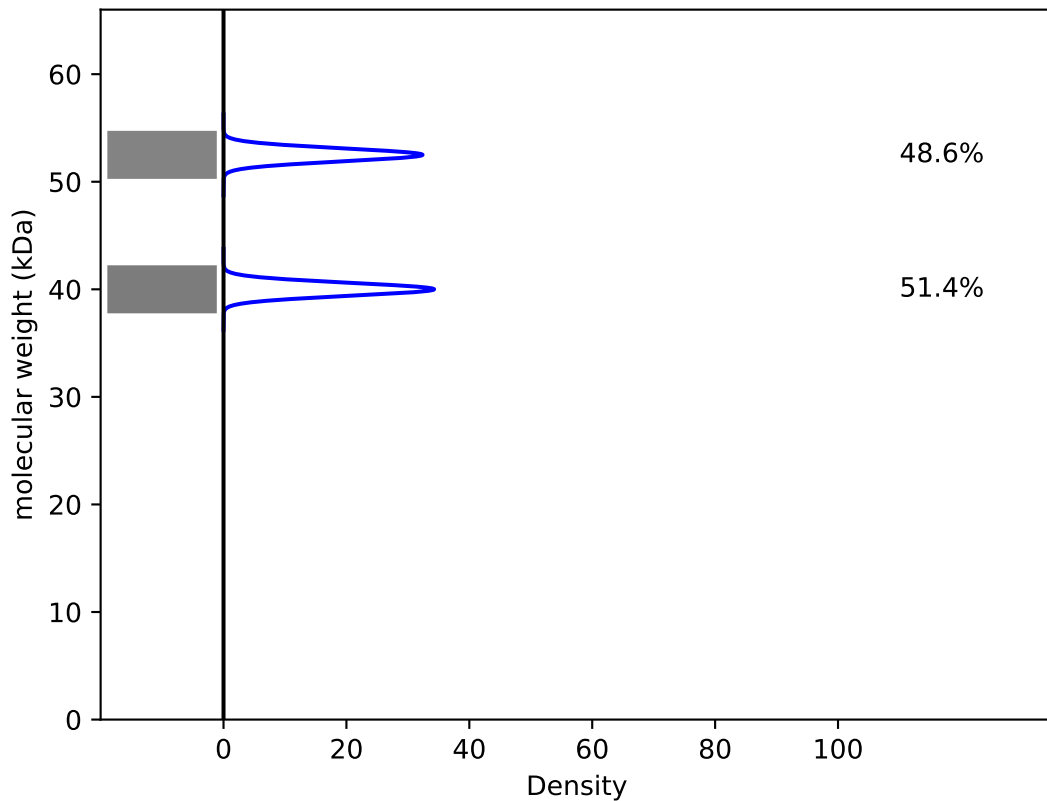



Q04917



Q05048



Q05639



Q06203



Q06323



Q06830



Q07020



Q07021





# Q8IUUG1



Q07627



# Q9BYS1



# Q07955



Q08257



Q08752



Q09028



# Q0VDF9





Q12765



# Q12792



# Q12800



# Q9NZI7



Q12846



# Q12849



# Q12904



# Q12905





# Q12972



# Q13084



# Q13098



# Q13112



# Q13126



# Q13148



# Q13151

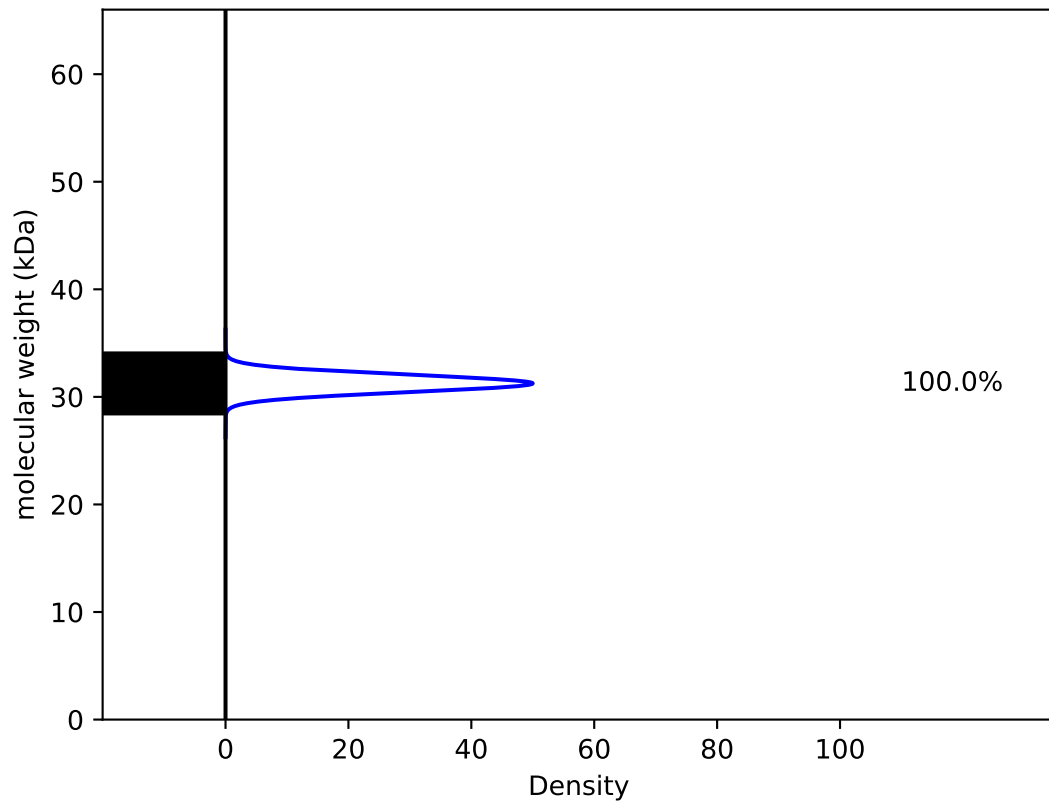

# Q13153





# Q13155



# Q13177



# Q13228



Q13242



Q13247



# Q13283



# POCB38

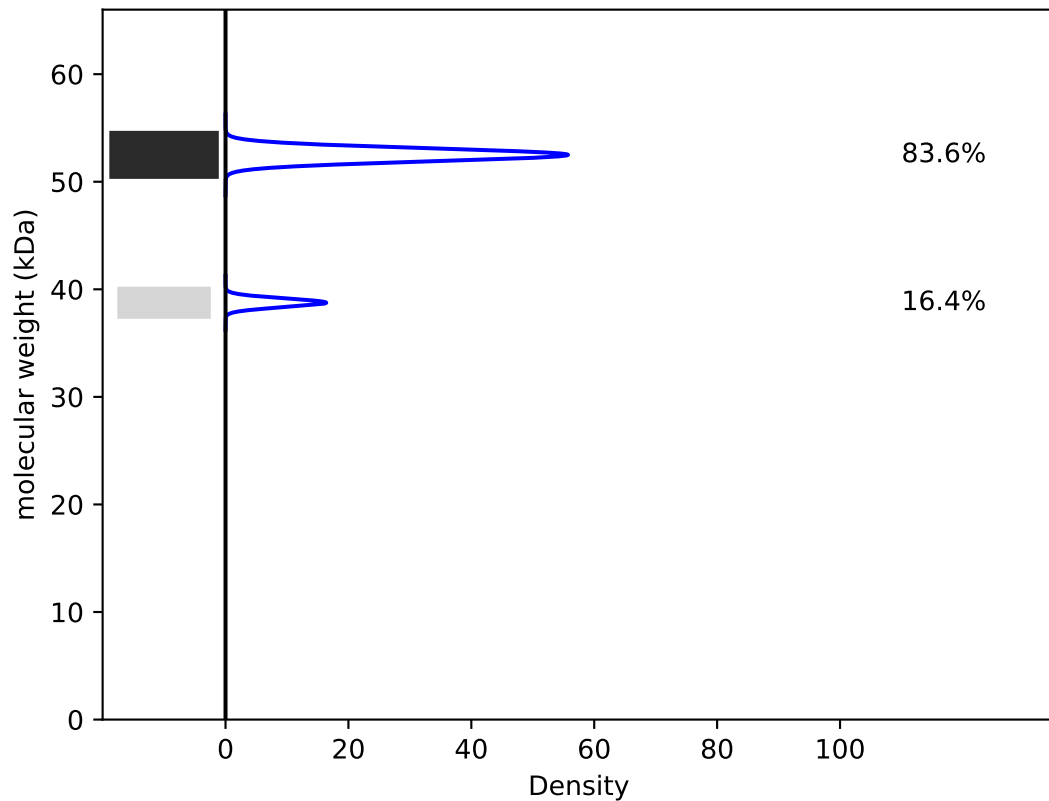

Q13347





# Q13363



# Q13451



# Q13509



# Q13526



O15428



# Q13547



# Q13561



# Q13564





# Q13630



# Q13685



Q13838



Q13868



# Q13895



# Q14019



Q14103



# Q14141





Q14165



# Q14232



# Q14240



# Q14247



# Q14254



Q14318



# Q14320



Q9Y247





# Q14558



# Q14696



# Q14919

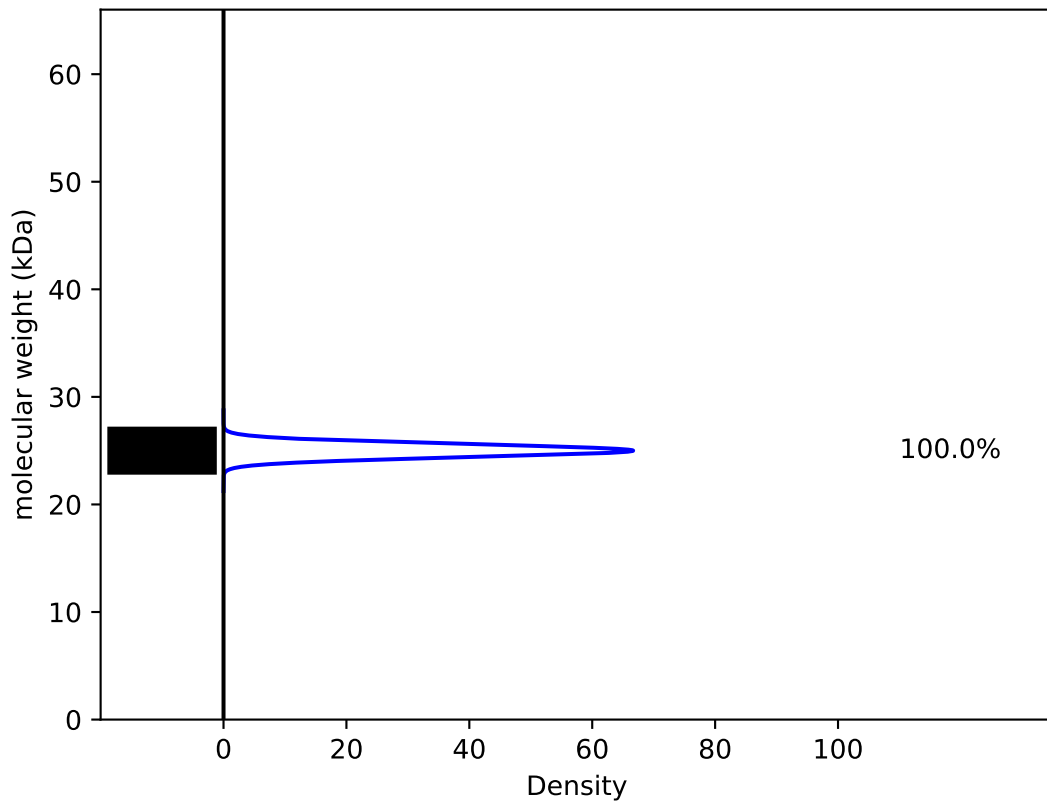

# Q15006



# Q15008



# Q15018



# Q15019



# Q15024





# Q15056



# Q15084



# Q15102



# Q15165



# Q15181



# Q15185



# Q15233



# Q15257





# Q15274



# Q15291

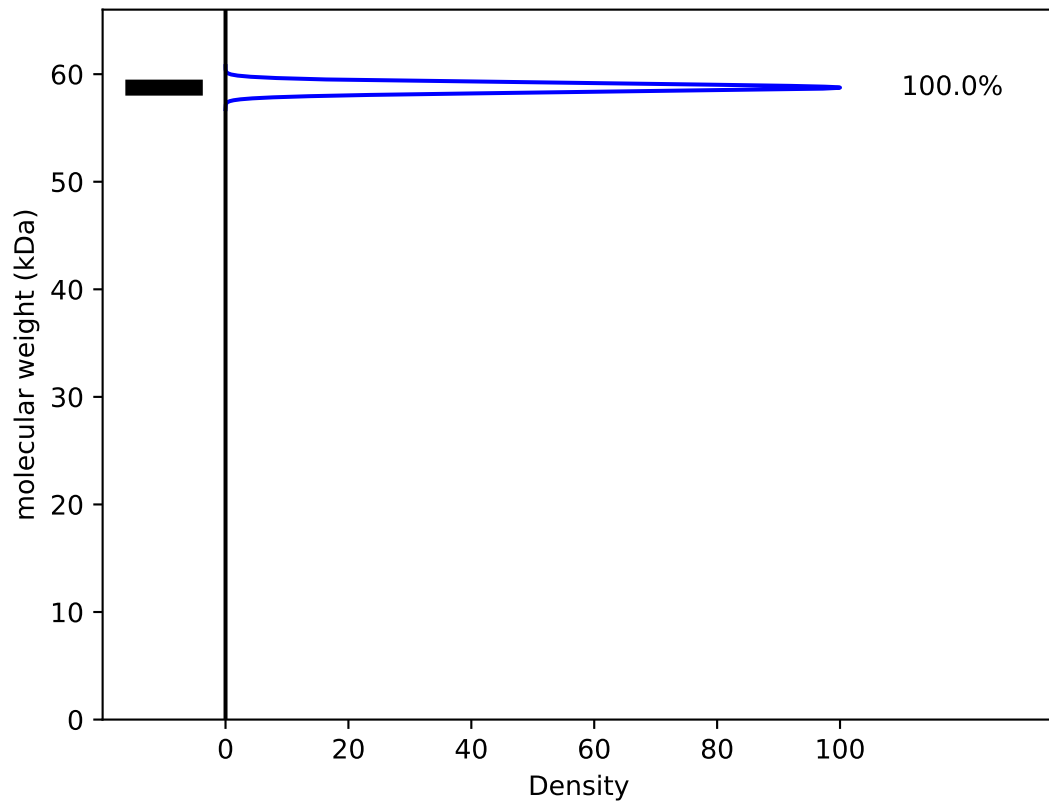

# Q15365



# Q15366

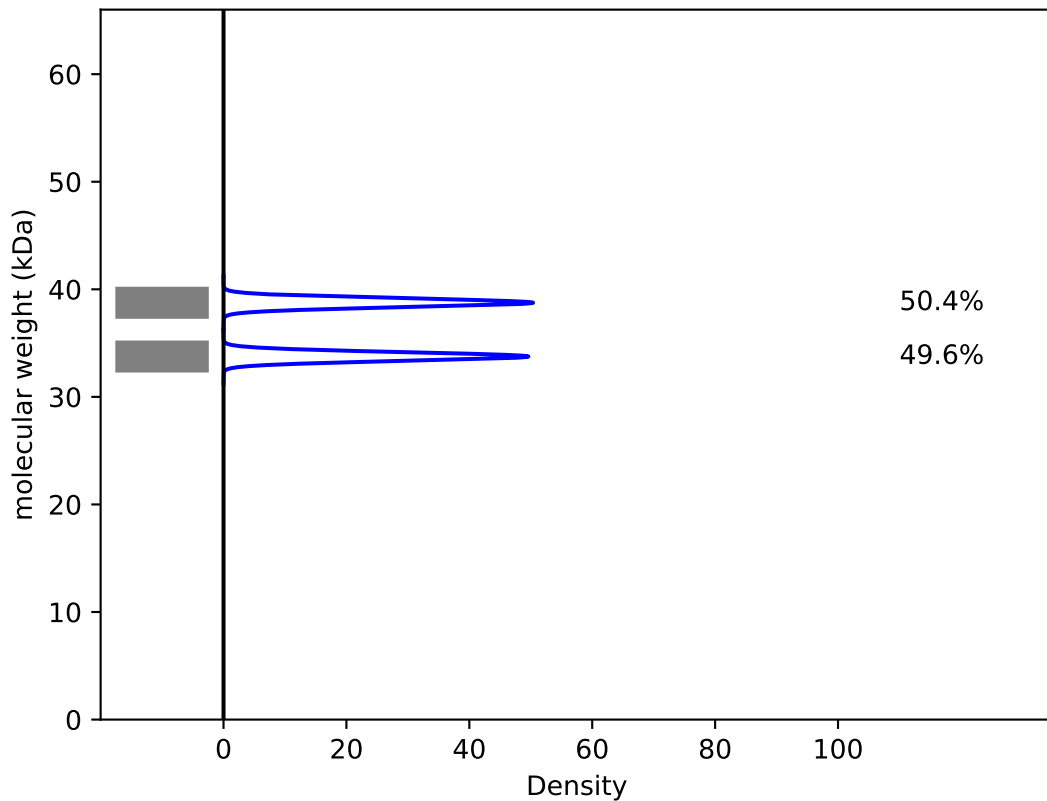

# P57721

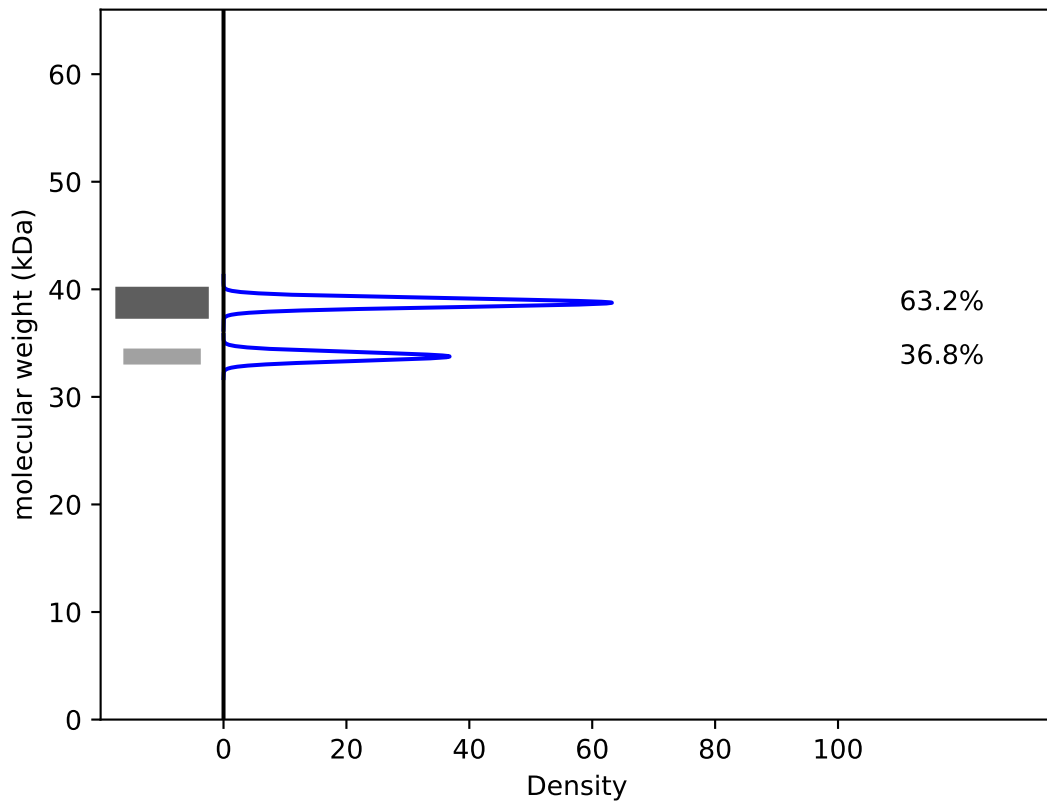

P57723



# Q15370



# Q15417

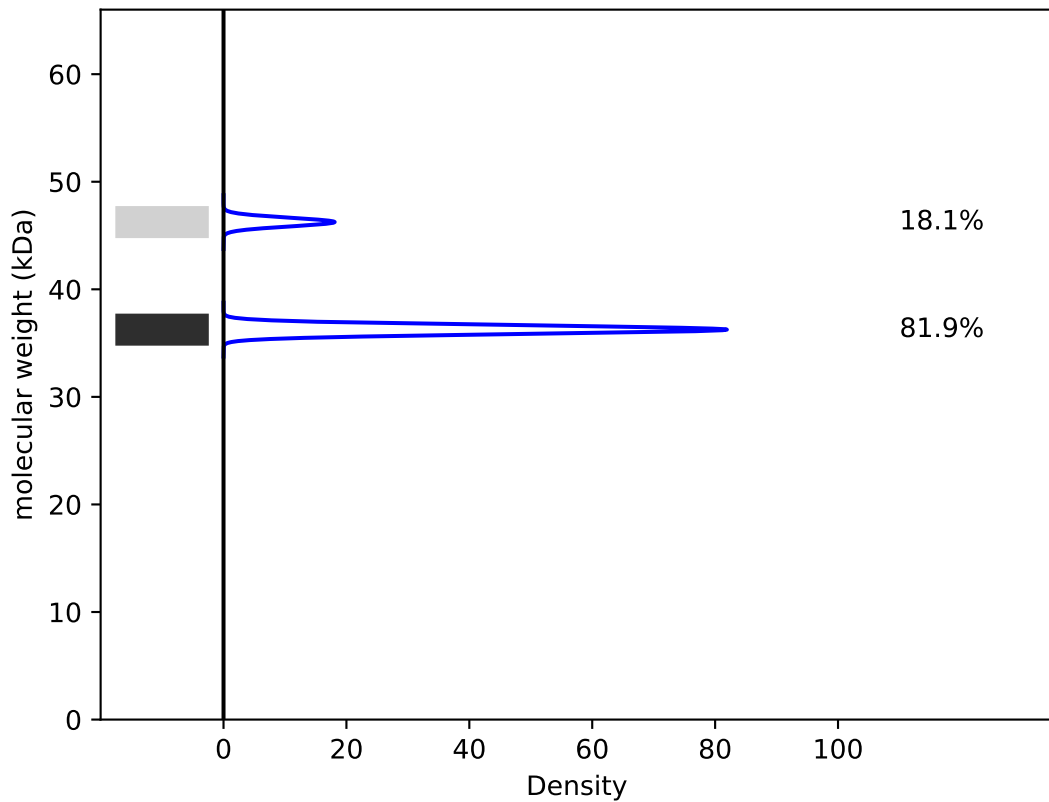



# Q15427

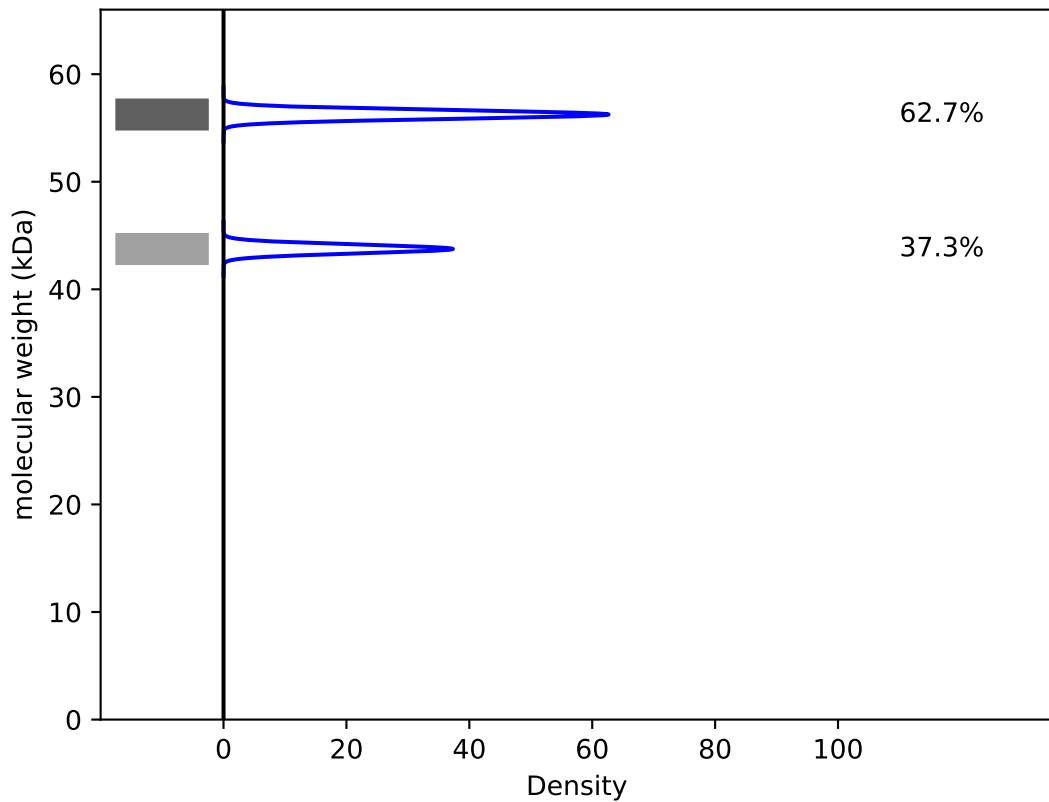

# Q15435



# Q15555

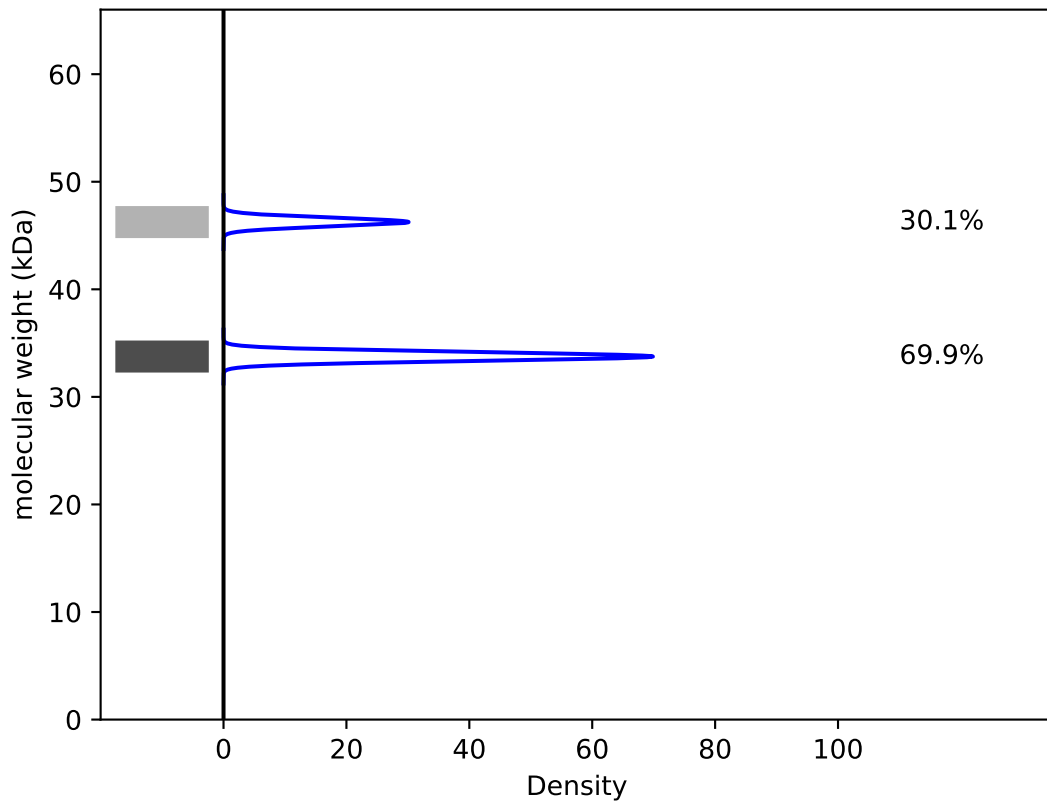

# Q15631



# Q15645



# Q15654



# Q15691



# Q15717





# Q15750



# Q15785



# Q15819



# Q15843



# Q15907



P62491



P57735



# Q16181





# Q6ZU15



# Q16204



# Q16222



# Q16352



# Q16540



# Q16543



Q16576



# Q16629





# Q16630



# Q16637



# Q16644



# Q16718



Q16762



Q16763



Q16777



# Q6FI13





Q99878



# Q96KK5



# Q9BTM1



# POCOS8



P20671



# Q16836



# Q3SXM5



# Q3ZCM7





# Q3ZCQ8



# Q52LJ0

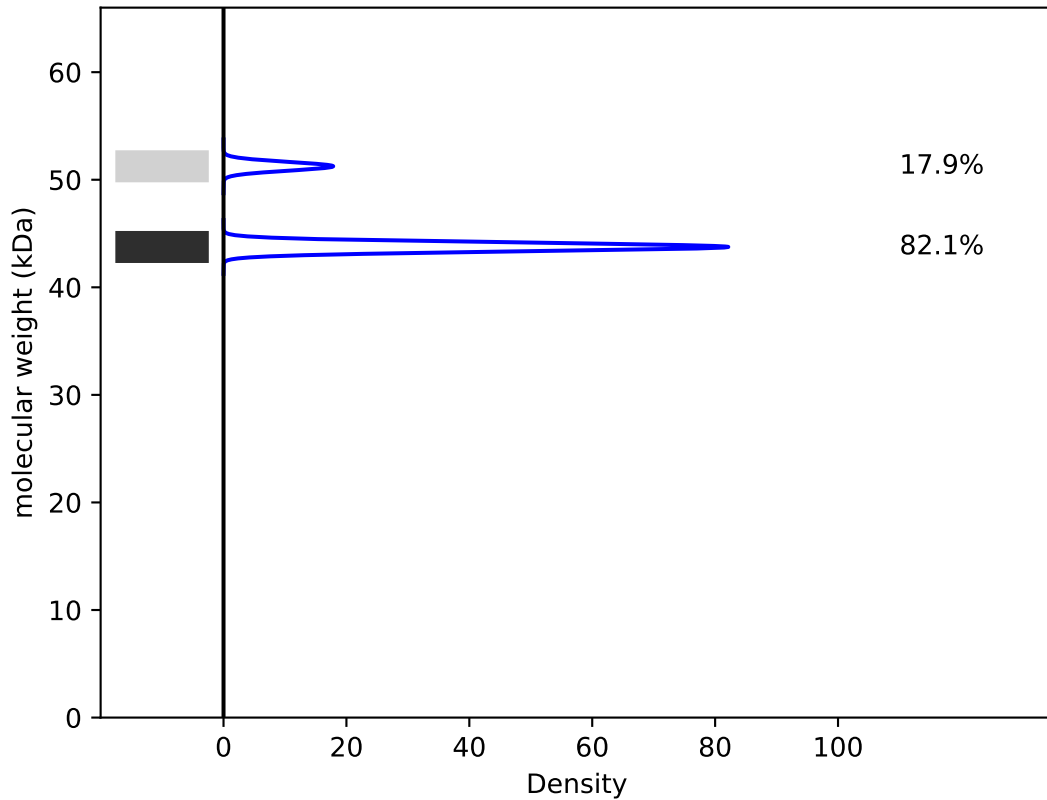

# Q53EL6



# Q53H12



# Q53H96



# Q53HC9



# Q5RKV6



# Q5T440





# Q5TDH0



# Q5VT66



# Q5VW32



# Q5VWZ2



# Q69YN2



# Q6DKJ4



# Q6FI81



# Q6IAA8





# Q6IBS0



# Q6NYC1



# Q6P1J9



# Q6P4I2



# Q6P9B6



# Q6S8J7



# Q6UXN9



# Q6YN16





# Q6ZN17



# Q6ZNW5



# Q71DI3



# Q71U36



# Q6PEY2



# Q7L1Q6



# Q7L2H7



# Q7L5N1





# Q9H8S9



# Q7L9L4



# Q7Z3B4



# Q7Z4H3



# Q7Z4H8



Q7Z4W1



# Q7Z7H5



# Q86TX2





# Q86V81



# Q86W42



# Q86Y82



# Q86YB8



# Q8IUUF8



# Q81UI8



# Q8IV38

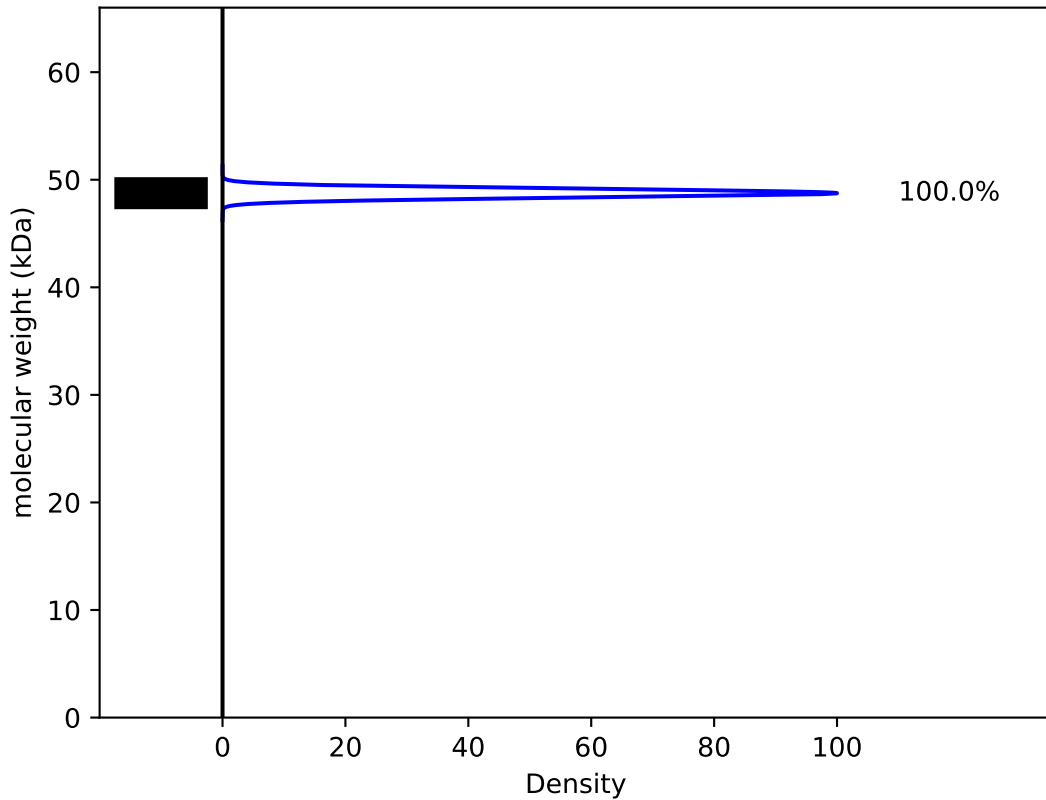

# Q8IVS2





# Q8IWS0



# Q8IZP0

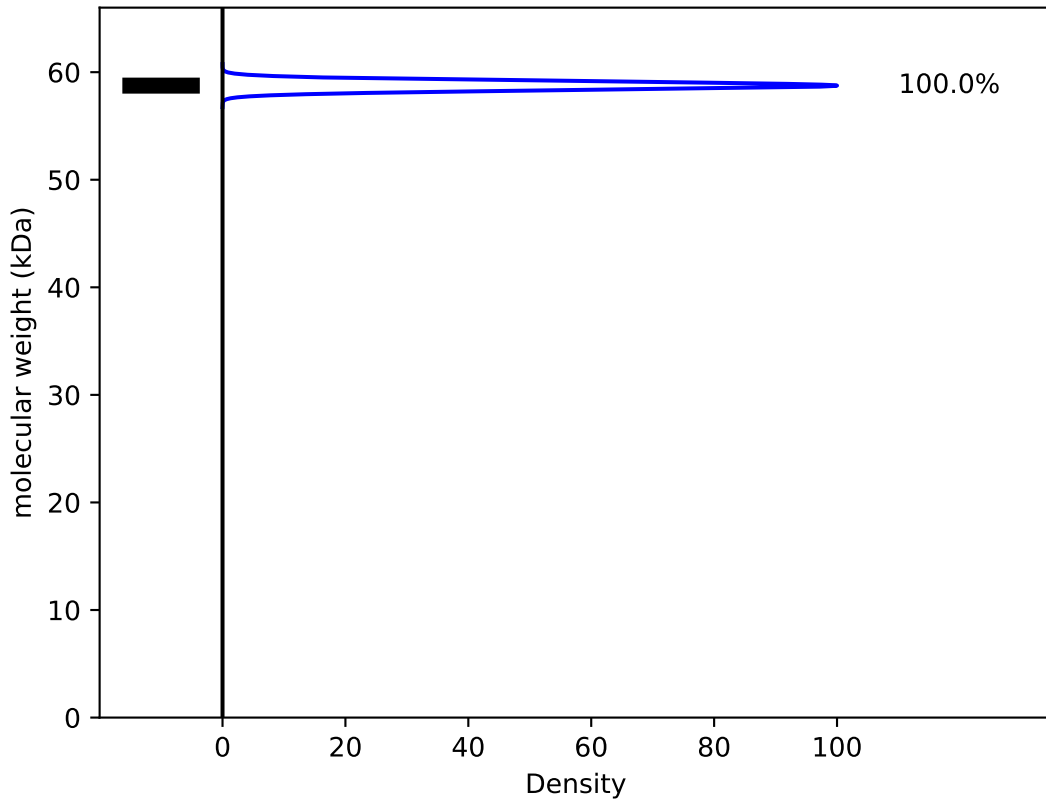

# Q8N183



# Q8N4V1



# Q8N5K1



# Q8N5M4



# Q8N684



# Q8NBN7





# Q8NBQ5



# Q8NBS9



# Q8NBT2



# Q8NBU5



# Q8NC51

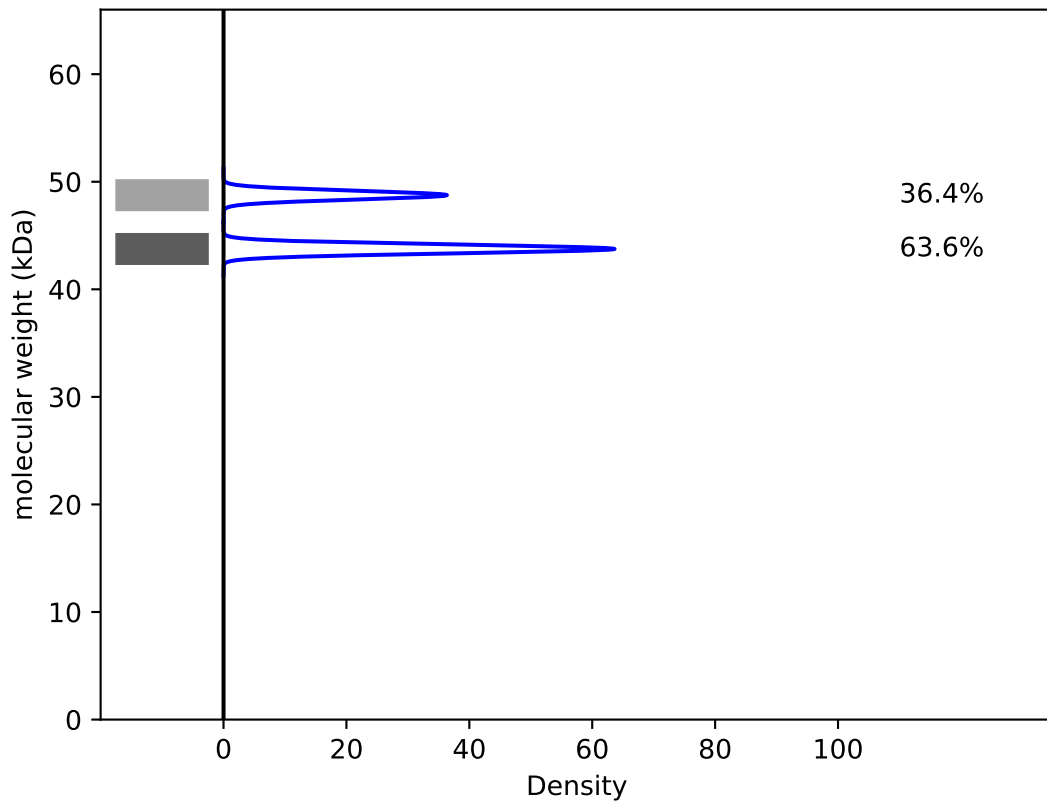

# Q8NCA5



# Q8NEJ9



# Q8NFH3





# Q8NFH4



# Q8NFH5



# Q8NFI4

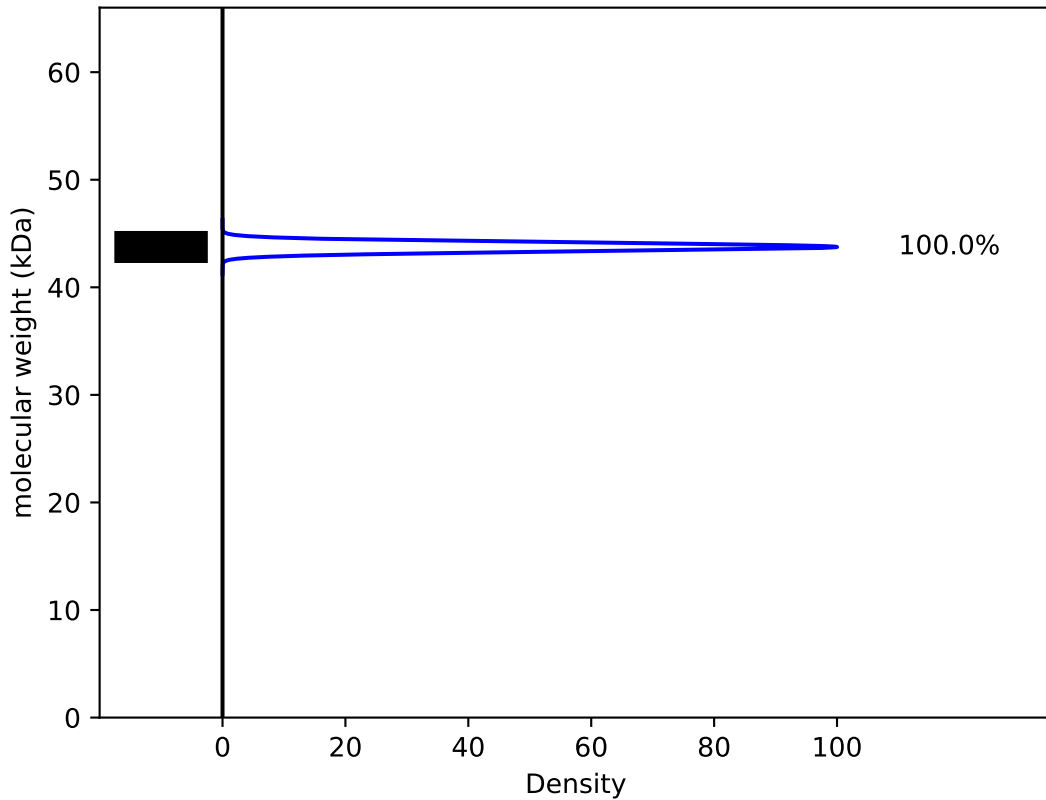

# Q8NFW8



# Q8TBX8



# Q8TDN6



# Q8TDP1



# Q8TEA8





# Q8TED0



# Q8WUA2



# Q8WVM0



Q8WVY7



# Q8WXF1

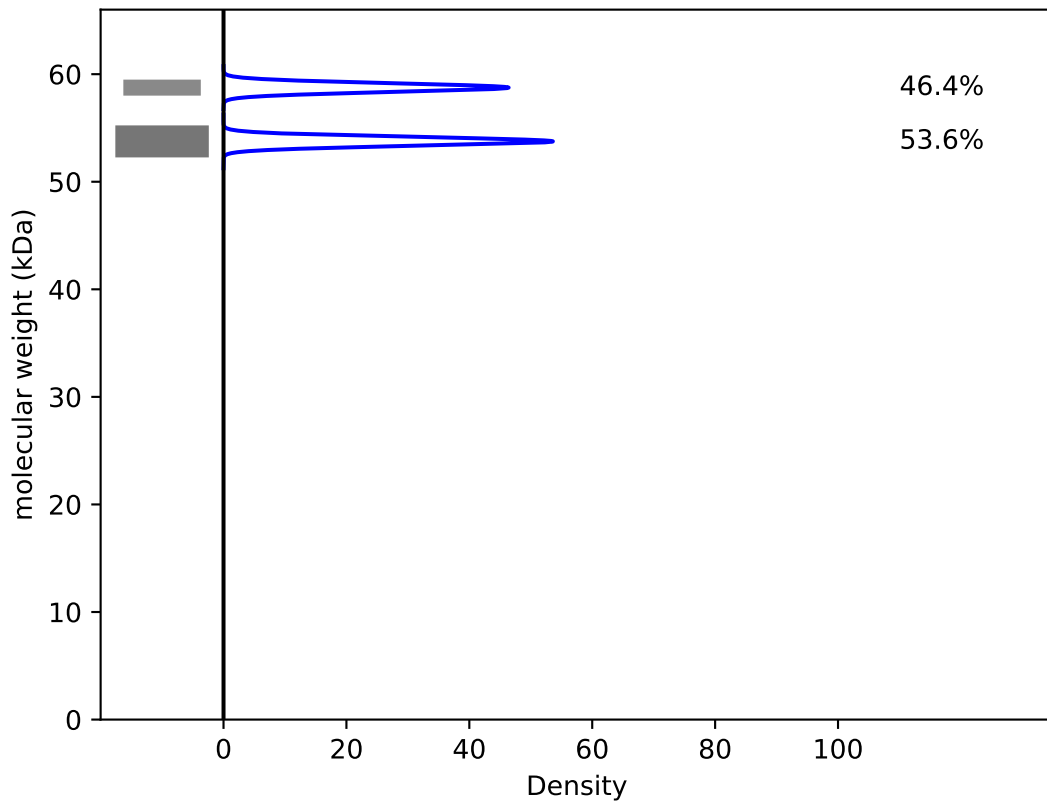

# Q92530



Q92575



Q92665





Q92688



Q92734



Q92769



Q92820



Q92879

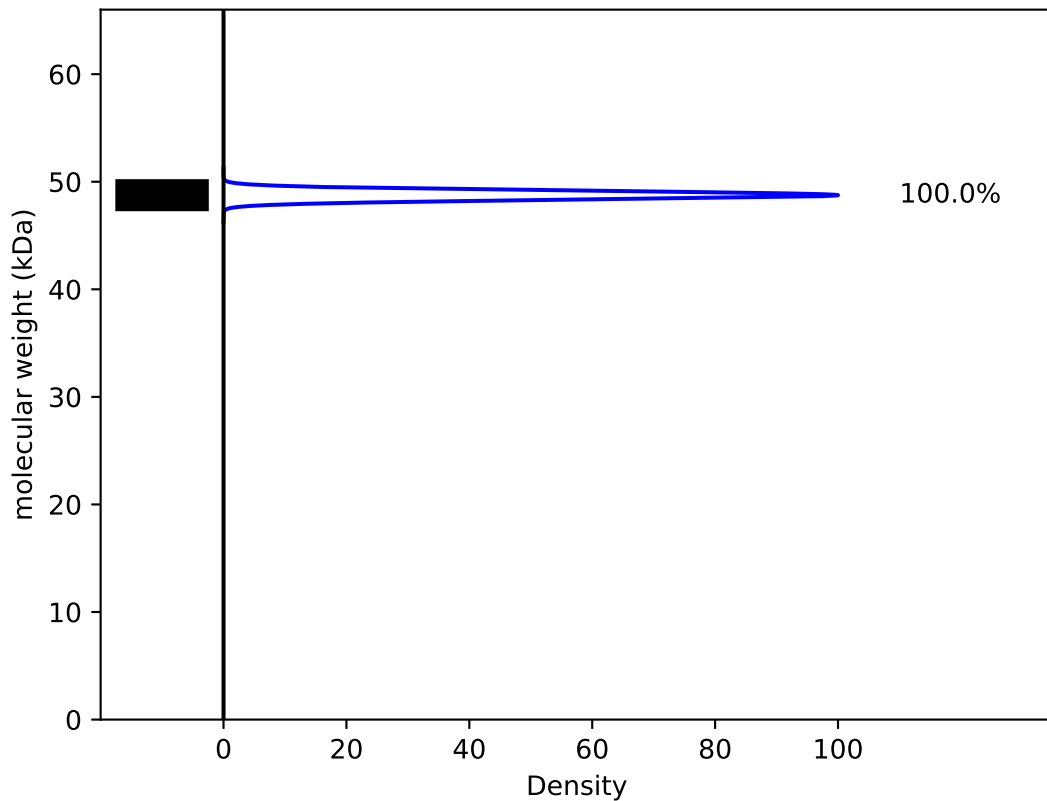

Q92882



Q92890



Q92917





Q92979



Q93077



# Q7L7L0



P04908



# Q969G3



# Q969U7



# Q96A33



# Q96AB3





# Q96AG4



# Q96AZ6



# Q96B26



# Q96BW5



# Q96C23



# Q96C36



# Q96C86



# Q96CN7





# Q96CS3



# Q96CT7



# Q96CW1



# Q96CX2



# Q96D46



# Q96DI7



# Q96DV4

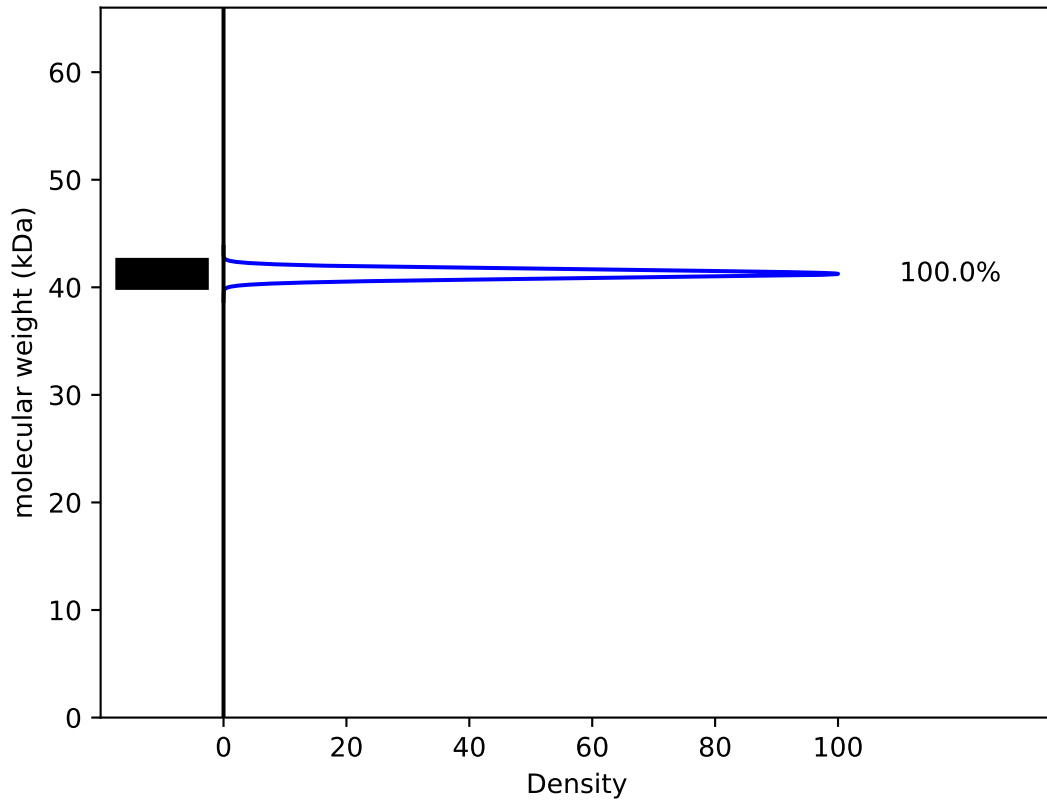

# Q96EE3





# Q96EK6



# Q96EL3



# Q96EP5



# Q96F86



# Q96FW1



# Q96GD0



# Q96GD4



# Q9UQB9





# Q96HE7



# Q96HS1

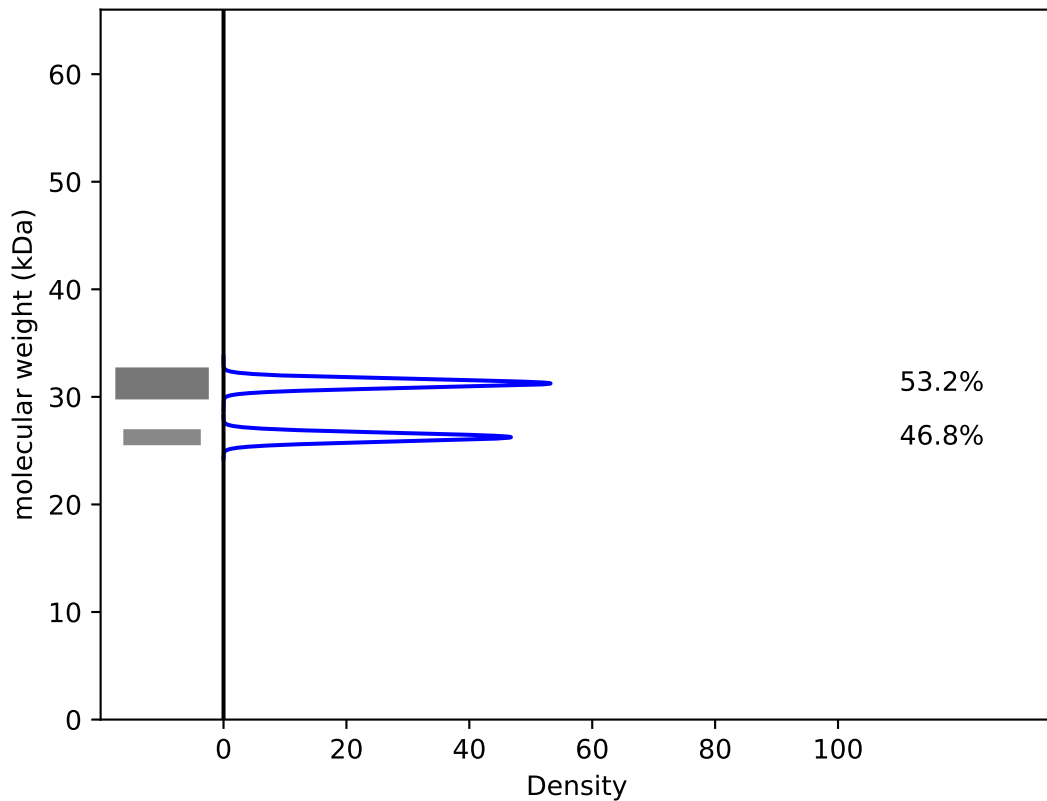

# Q96HY6



# Q96I15



# Q96I25



# Q96IJ6

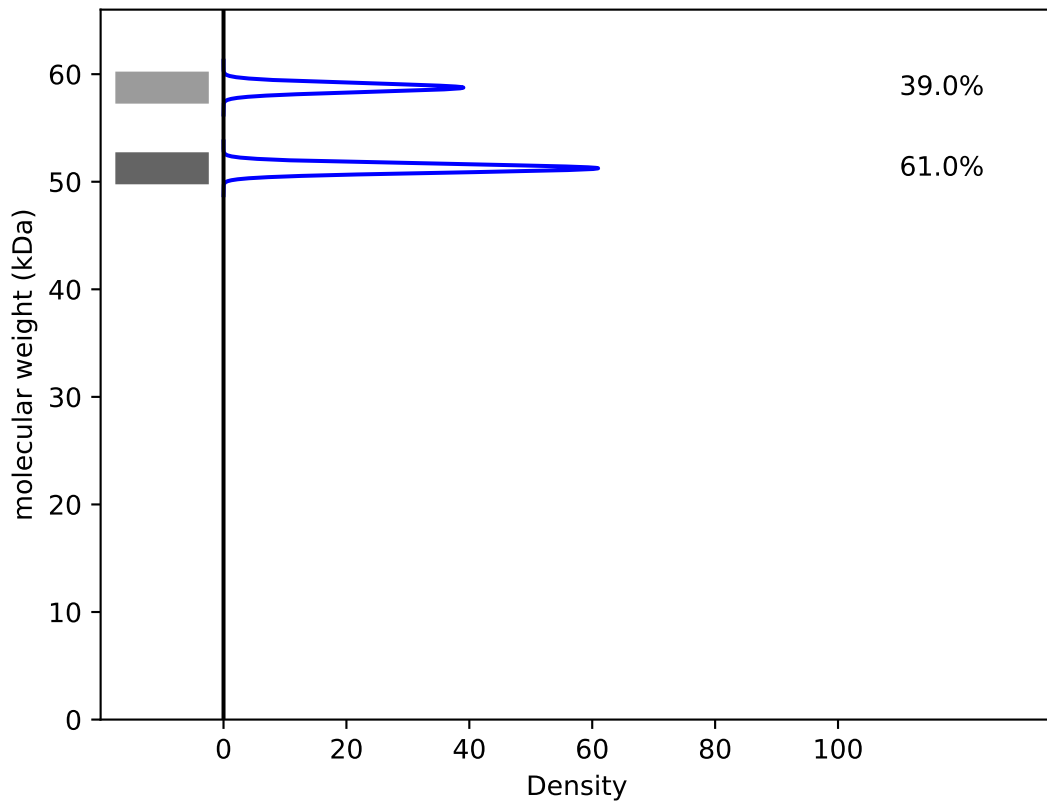

# Q96IU4



Q96J01





Q96JJ7



# Q96KB5



# Q96KP4



# Q96M27



# Q96MG7



# Q96MX6



# Q96P16



# Q96PU8





# Q96QV6



# Q96S44



# Q96T60



Q99426



Q99436



Q99442



Q99471



Q99496





Q99497



Q99536



Q99541



Q99598



Q99611



Q99614



# Q99615



Q99623





Q99627



Q99729



# Q99733

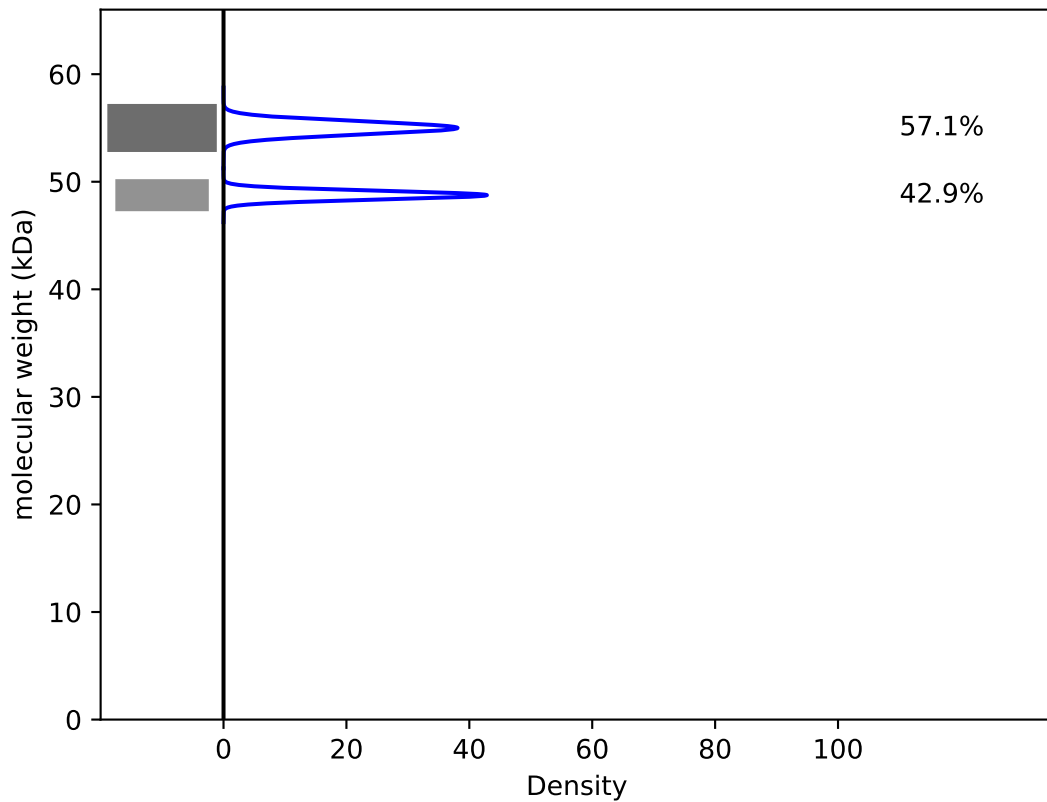

Q99747



Q99829



Q99873



# Q99961



# Q99962





# Q99986



# Q9BPU6



# Q9BQ67



# Q9BQA1



# Q9BQC3



# Q9BQE3



# Q9BQE5



# Q9BR76





# Q9BRA2



# Q9BRG1



# Q9BRP4



# Q9BRT2



# Q9BRT9



# Q9BRX5



# Q9BRX8



# Q9BS26





# Q9BSD7



# Q9BSH5



# Q9BT73



# Q9BTT0



# Q9BTV5



# Q9BTZ2



# P0CG22



# Q9BUF5





# Q9BUI4

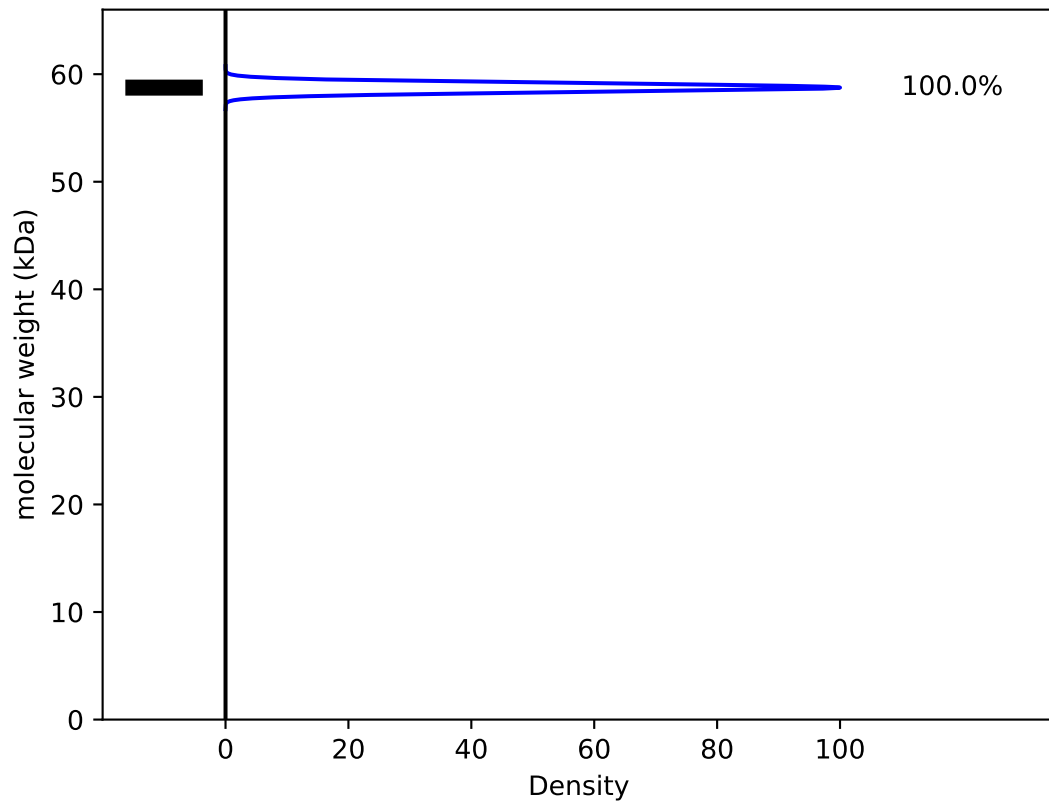

# Q9BUL8



# Q9BUT1



# Q9BV20



# Q9BV44



# Q9BV86



# Q9BVA1



# Q9BVI4





# Q9BVK6



# Q9BVM2



# Q9BW83



# Q9BW91



# Q9BWD1



# Q9BWF3



# Q9BXS5



Q9Y6Q5





# Q9BY32



# Q9BY77



# Q9BYD1



# Q9BYD3



# Q9BZ17



# Q9BZX2



# Q9BZZ5



# Q9C0B1





Q9C0E8



# Q9GZL7



# Q9GZS3



# Q9GZT3



# Q9GZZ1

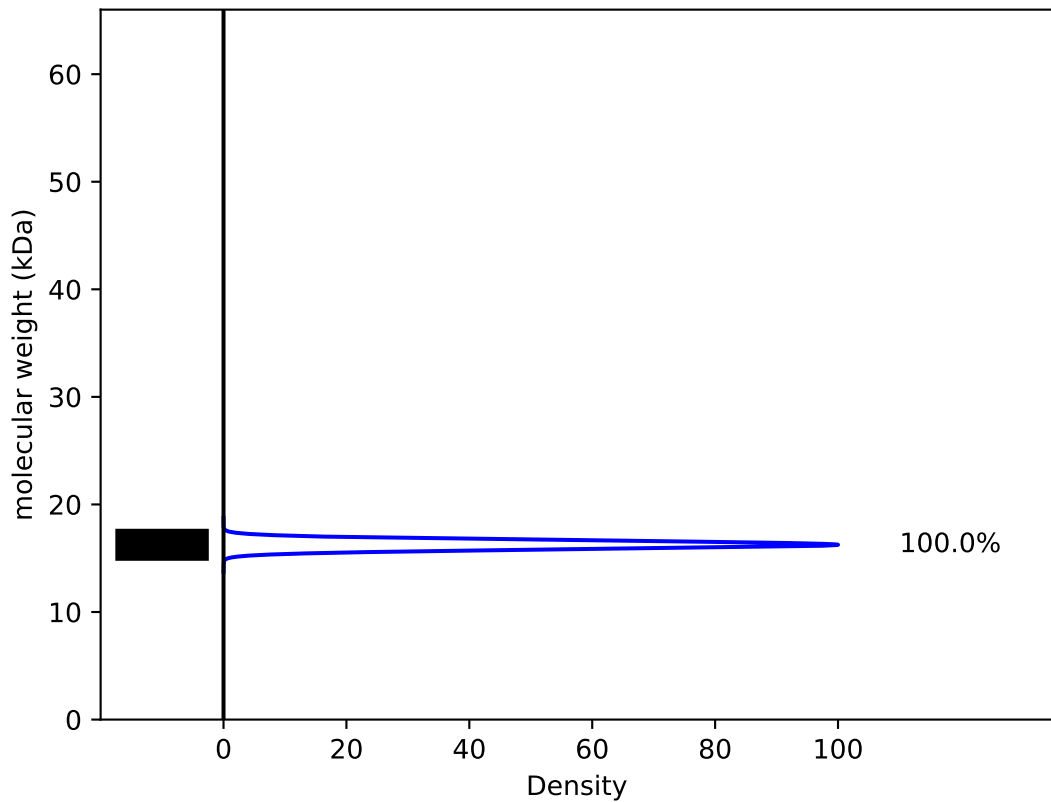

# Q9GZZ9



# Q9H074



Q9H0C8





# Q9H0E2



# Q9H0P0



Q9H0S4

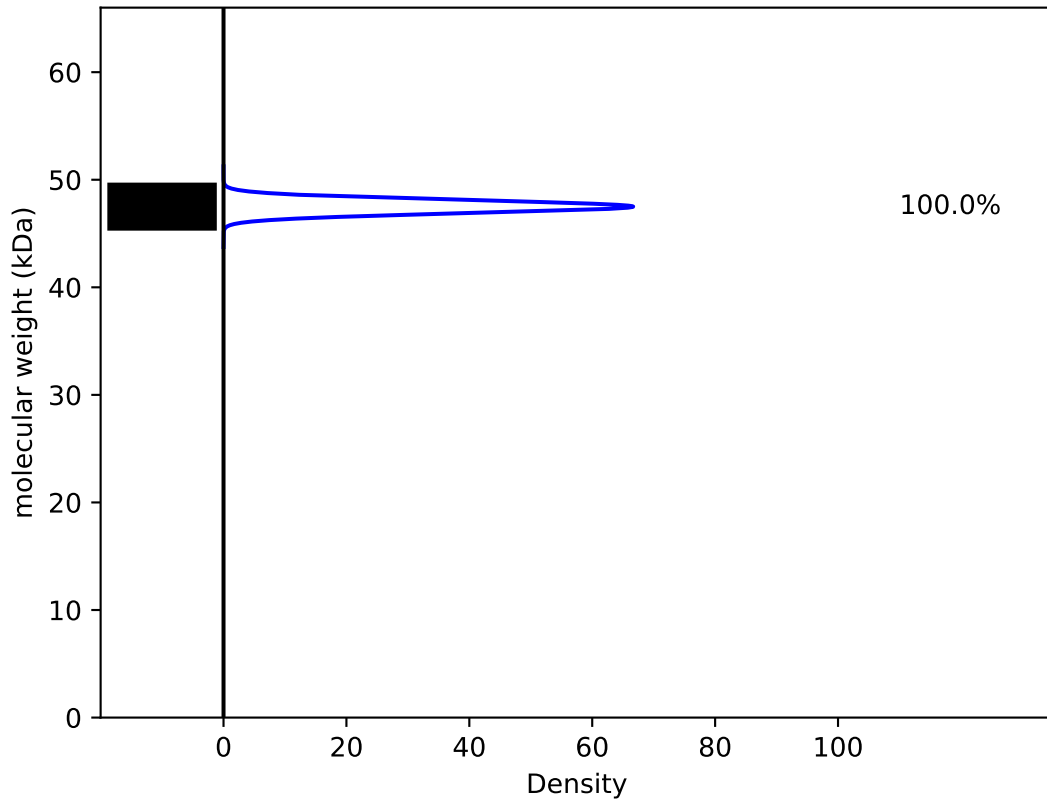

# Q9H0U4



Q92928



# Q9H0W9



# Q9H223



# Q9H3K6





# Q9H3N1



# Q9H3R5



# Q9H444



# Q9H488

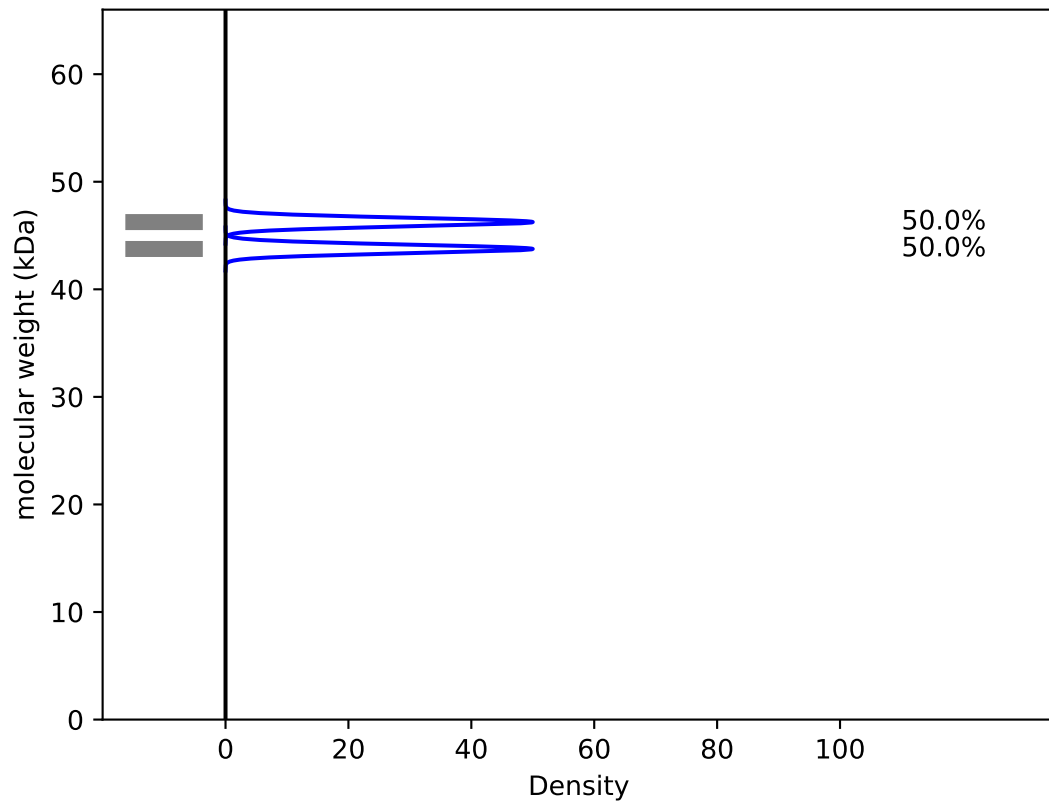

# Q9H773



# Q9H7B2



Q9H8Y8



# Q9H974

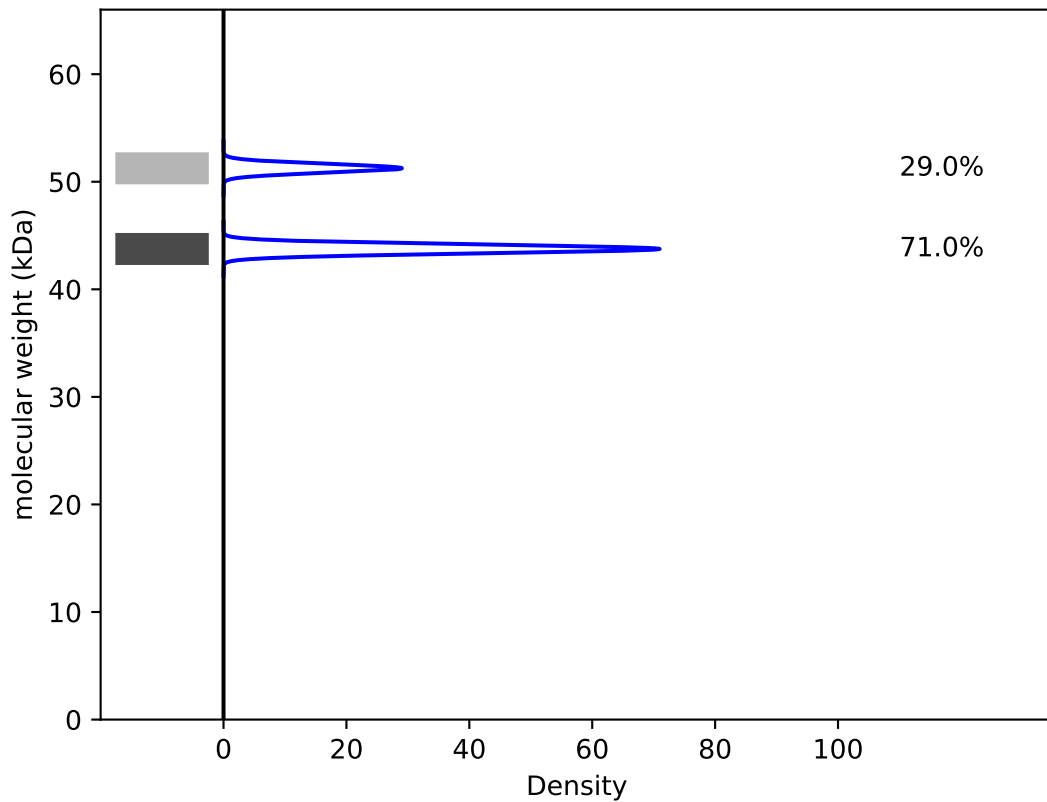



# Q9H993



# Q9H9Q2



# Q9HA64



# Q9HAB8



# Q9HAV7



# Q9HB71



# Q9HBH5



# Q9HC38





# Q9HCN4



# Q9HCU5



# Q9HDC9



# Q9NNW7



# Q9NP66



# Q9NP72



# Q9NP77



# Q9NP79





# Q9NP92



# Q9NPD3



# Q9NPH2



# Q9NPQ8



# Q9NVN3



# Q9NQ48



# Q9NQR4



# Q9NQT4





# Q9NQT5



# Q9NR31



# Q9NR45



# Q9NR50



# Q9NRG9



# Q9NRN7



# Q9NRV9



# Q9NRX2





# Q9NT62



# Q9NTK5



# Q9NUP9



O14910



# Q9HAP6



# Q9NUU7



# Q9UHL0



# Q9NVA2





# Q9NVJ2



# Q9NVM6



# Q9NVT9



# Q9NW64



# Q9NWT6



# Q9NWX4



# A8MVJ9



# Q9NX40





# Q9NX46



# Q9NX58



# Q9NX63



# Q9NXG2



# Q9NY12



# Q9NYB0



# Q9NYK5



# Q9NYL9





# Q9NZL4



# Q9NZL9



# Q9P015



# Q9P032



# Q9P0L0



# Q9P1F3



# Q9P258



# Q9P289





O00506



# Q9P2W9



# Q9P2X0



# Q9UBE0



# Q9UBI1



# Q9UBP6



# Q9UBQ0



# Q9UBQ5





# Q9UBQ7



# Q9UBS4



# Q9UBV8



# Q9UBW8



# Q9UDY4



# Q9UET6



# Q9UH62



# Q9UHD1





# Q9UHV9



# Q9UHX1

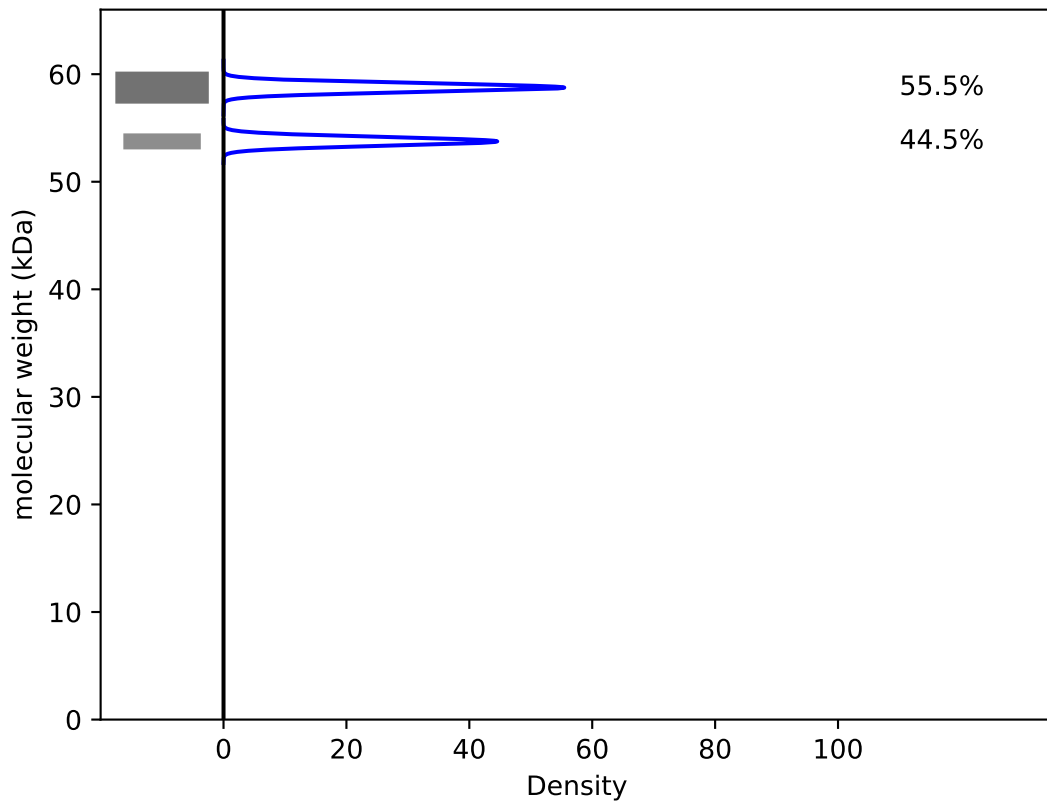

# Q9UHY7



# Q9UI30



# Q9UIJ7



# Q9UJA5



# Q9UJU6



# Q9UJW0





# Q9UJZ1

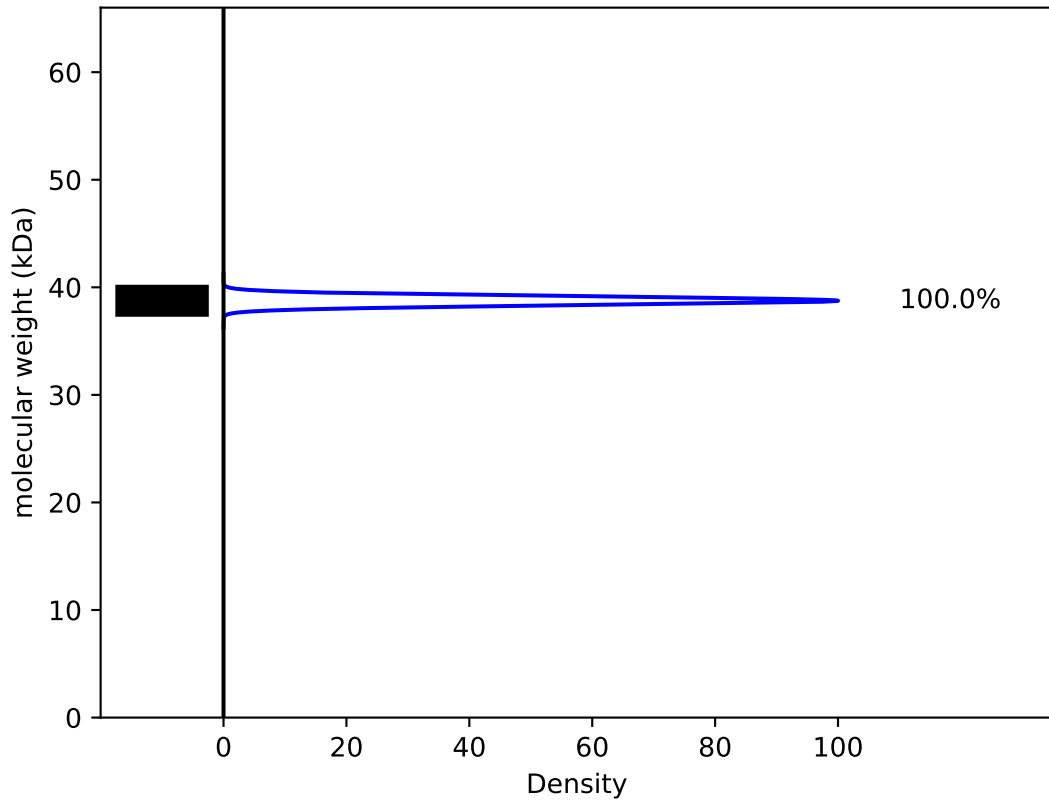

# Q9UKD2



# Q9UKK9



# Q9UKL0



# Q9P2K3



# Q9UKM9



Q9UKX7



# Q9UL25





# Q9UL46



# Q9ULV4



# Q9UMR2



# Q9UMS4



# Q9UN37



# Q9UN86

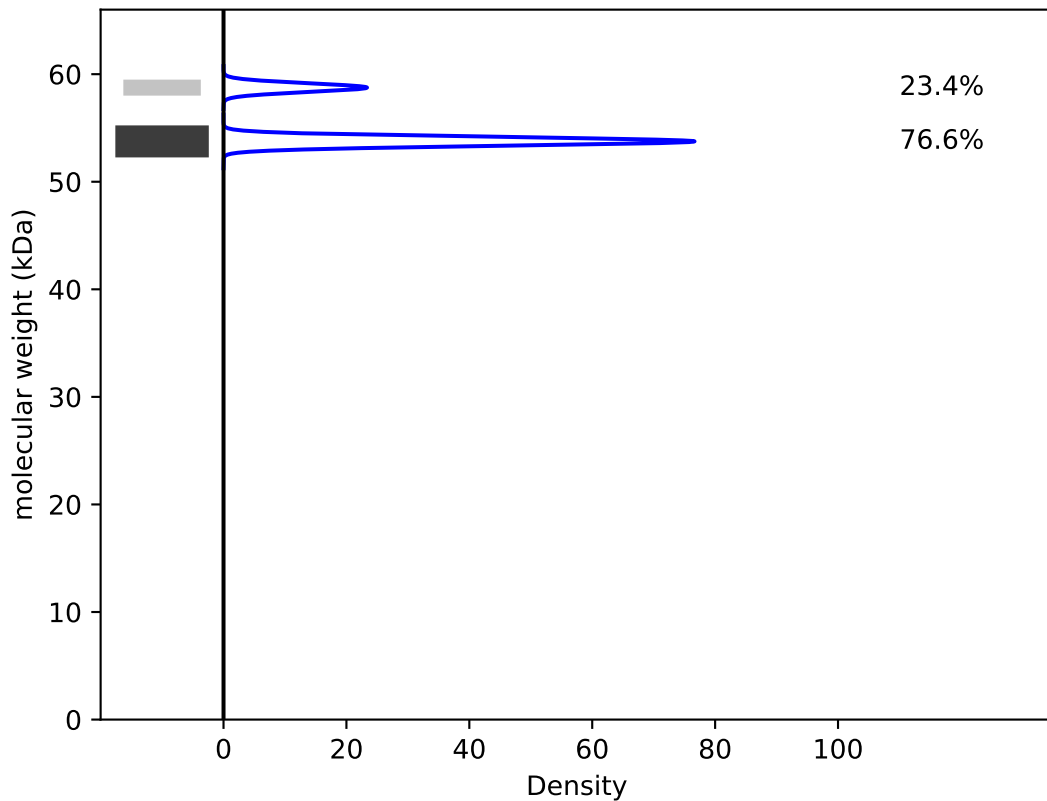

# Q9UNE7



# Q9UNH7





# Q9UNM6

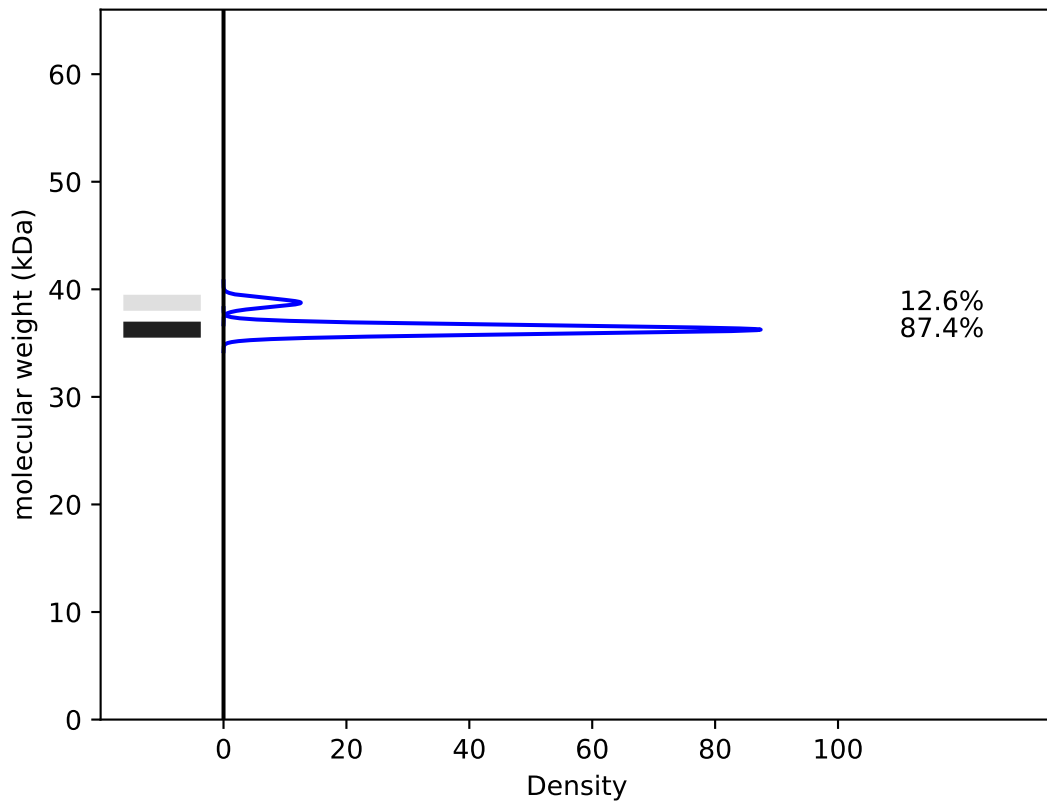

# Q9UNZ2



# Q9UQ80



# Q9Y224



# Q9Y230



# Q9Y237



# Q9Y241



# Q9Y265





# Q9Y266



Q9Y277



# Q9Y281



# Q9Y285



# Q9Y291



# Q9Y295



# Q9Y2B0



Q9Y2G5





Q9Y2P8



Q9Y2Q3



Q9Y2R5



Q9Y2R9



# Q9Y2T2



P53677



Q9Y2Z0



# Q9Y305





# Q9Y314



# Q9Y333



# Q9Y371



# Q9Y383



# Q9Y394



# Q9Y3A5



# Q9Y3B2



# Q9Y3B3





# Q9Y3B4



Q9Y3B7



# Q9Y3B9

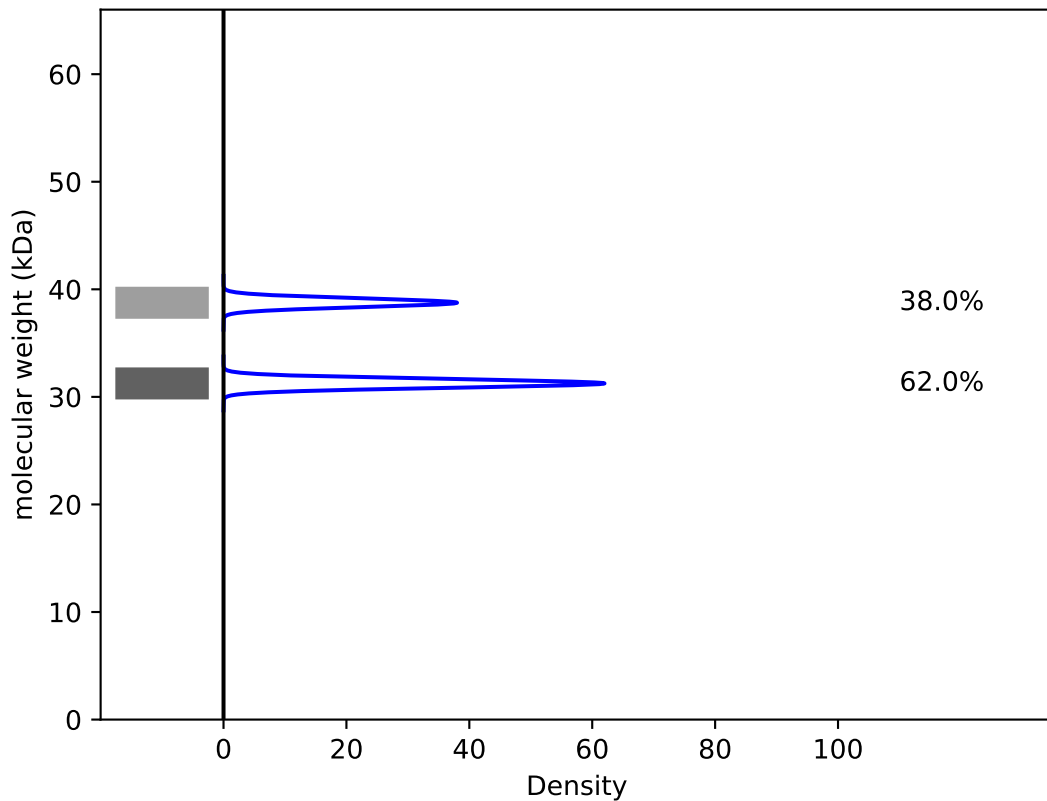

Q9Y3C4



Q9Y3C8



Q9Y3D3



Q9Y3D6



Q9Y3D7





Q9Y3D9



Q9Y3E5



Q9Y3F4



# Q9Y3I0



Q9Y3Y2



# Q9Y508



Q9Y512



# Q9Y570





Q9Y5K5



Q9Y5K8



# Q9Y5M8



# Q9Y5P6



Q9Y5Q8



# Q9Y5S9



Q9Y5U8

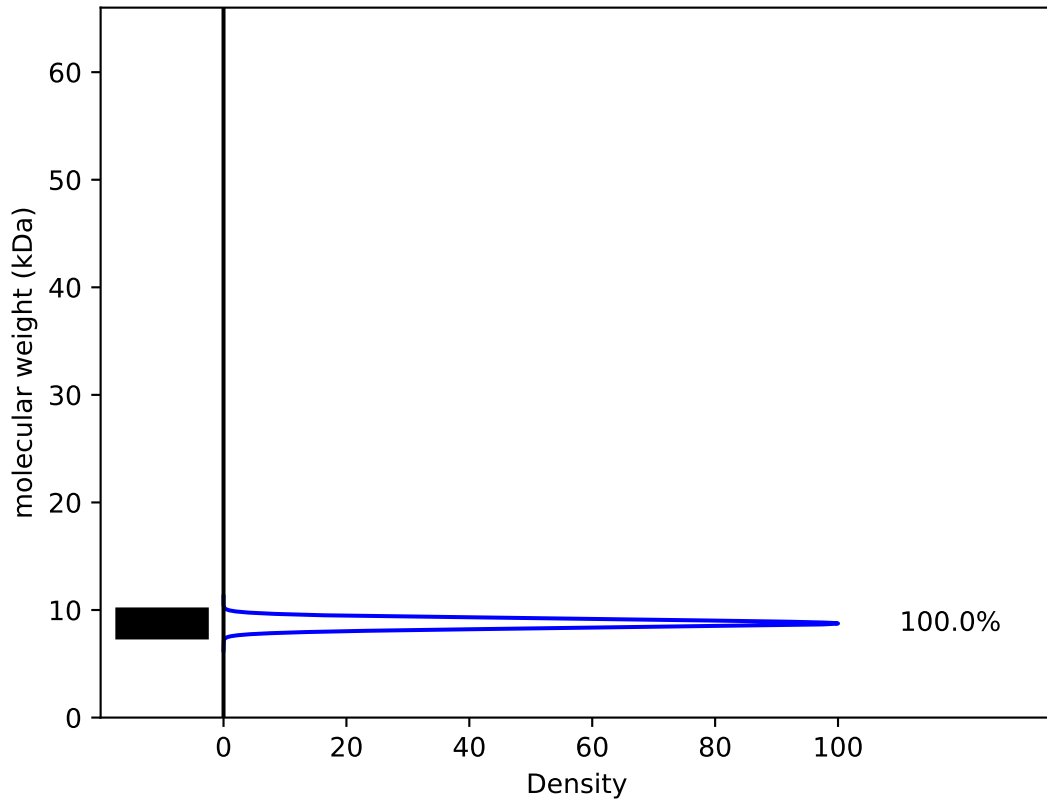

# Q9Y5X3





Q9Y617



# Q9Y676



# Q9Y696



O15247



Q9Y6A4



# Q9Y6B6



Q9Y6C9



Q9Y6E0





Q9Y6E2



Q9Y6G9



Supplement: d2cb00179a1.pdf [file d2cb00179a1.pdf]
