# Supplementary material for: Quantitative profiling of PTM stoichiometry by resolvable mass tags
Source: Royal Society of Chemistry journal article supplement (doi:10.1039/d2cb00179a), 2022-01-01
Supplement: d2cb00179a3.xlsx [file d2cb00179a3.xlsx]

## Sheet: Notes
Stoichiometry of HNE modification determined by STO-MS strategy. Sheet 1: Stoichiometry of HNE modification quantified in the first biological replicate. Sheet 2: Stoichiometry of HNE modification quantified in the second biological replicate. Sheet 3: Stoichiometry of HNE modification quantified in both biological replicates. Sheet 4: Stoichiometry of DMSO control sample in the first biological …

## Sheet: 1
Uniprot #	Gene name	Unmodified	Monomodified	Dimodified	Trimodified	Tetramodified
P35250	RFC2	0.105756	0.656973	0.237271	0	0
O95433	AHSA1	0.110853	0.571933	0.317213	0	0
Q96HE7	ERO1A	0.125663	0.874337	0	0	0
Q86YB8	ERO1B	0.125663	0.874337	0	0	0
Q9BUL8	PDCD10	0.127253	0.872747	0	0	0
P38159	RBMX	0.128251	0.871749	0	0	0
Q96E39	RBMXL1	0.128251	0.871749	0	0	0
Q86V81	ALYREF	0.129022	0.870978	0	0	0
P20645	M6PR	0.130169	0.23465	0.333026	0.302154	0
P30043	BLVRB	0.130566	0.869434	0	0	0
P16989	YBX3	0.131021	0.868979	0	0	0
Q8NBJ7	SUMF2	0.131078	0.868922	0	0	0
P48047	ATP5PO	0.131844	0.868156	0	0	0
O75822	EIF3J	0.141339	0.858661	0	0	0
O43837	IDH3B	0.14226	0.641796	0.215943	0	0
P29992	GNA11	0.1423	0.7426	0.1151	0	0
P50148	GNAQ	0.1423	0.7426	0.1151	0	0
P53582	METAP1	0.143582	0.856418	0	0	0
O75794	CDC123	0.147921	0.852079	0	0	0
P23193	TCEA1	0.148616	0.851384	0	0	0
Q15560	TCEA2	0.148616	0.851384	0	0	0
P40121	CAPG	0.149779	0.850221	0	0	0
Q9BUF5	TUBB6	0.154797	0.845203	0	0	0
P60981	DSTN	0.156162	0.462593	0.381245	0	0
Q9Y6I9	TEX264	0.157684	0.842316	0	0	0
Q8NBS9	TXNDC5	0.158807	0.841193	0	0	0
Q92905	COPS5	0.158934	0.636785	0.20428	0	0
Q9UKM9	RALY	0.16386	0.83614	0	0	0
P68366	TUBA4A	0.163951	0.65124	0.184809	0	0
Q92890	UFD1	0.16429	0.83571	0	0	0
P55209	NAP1L1	0.165207	0.834793	0	0	0
Q9NWS0	PIH1D1	0.166952	0.833048	0	0	0
O00505	KPNA3	0.175481	0.709076	0.115443	0	0
P54578	USP14	0.175557	0.67253	0.151913	0	0
Q13242	SRSF9	0.177706	0.481663	0.340631	0	0
P36404	ARL2	0.180007	0.819993	0	0	0
Q8NCA5	FAM98A	0.180619	0.819381	0	0	0
O75937	DNAJC8	0.181916	0.818084	0	0	0
P01891	HLA-A	0.182934	0.644781	0.172284	0	0
P30459	HLA-A	0.182934	0.644781	0.172284	0	0
P16189	HLA-A	0.182934	0.644781	0.172284	0	0
P16190	HLA-A	0.182934	0.644781	0.172284	0	0
P30512	HLA-A	0.182934	0.644781	0.172284	0	0
P10314	HLA-A	0.182934	0.644781	0.172284	0	0
Q9NYL9	TMOD3	0.185513	0.44357	0.370917	0	0
O60573	EIF4E2	0.19	0.81	0	0	0
P61088	UBE2N	0.192856	0.807144	0	0	0
Q5JXB2	UBE2NL	0.192856	0.807144	0	0	0
Q8WWH5	TRUB1	0.195	0.6538	0.1512	0	0
Q99961	SH3GL1	0.195336	0.598157	0.206507	0	0
Q99962	SH3GL2	0.195336	0.598157	0.206507	0	0
O96008	TOMM40	0.198942	0.801058	0	0	0
Q9BV20	MRI1	0.202008	0.797992	0	0	0
P36873	PPP1CC	0.20237	0.575856	0.221774	0	0
P52907	CAPZA1	0.212358	0.787642	0	0	0
P06132	UROD	0.2127	0.4631	0.3242	0	0
Q13630	GFUS	0.217932	0.566158	0.21591	0	0
Q00577	PURA	0.2198	0.7802	0	0	0
Q9GZV4	EIF5A2	0.220516	0.779484	0	0	0
P63241	EIF5A	0.220516	0.779484	0	0	0
Q6IS14	EIF5AL1	0.220516	0.779484	0	0	0
P62829	RPL23	0.221668	0.778332	0	0	0
P68371	TUBB4B	0.221982	0.778018	0	0	0
Q9BVL2	NUP58	0.224741	0.775259	0	0	0
P04062	GBA	0.225793	0.393423	0.380784	0	0
P47755	CAPZA2	0.226607	0.608436	0.164957	0	0
O75494	SRSF10	0.229701	0.770299	0	0	0
Q8WXF0	SRSF12	0.229701	0.770299	0	0	0
Q9UKY7	CDV3	0.2315	0.7685	0	0	0
P40938	RFC3	0.231822	0.768178	0	0	0
Q9Y5Y2	NUBP2	0.232377	0.767623	0	0	0
Q13509	TUBB3	0.2326	0.6223	0.1451	0	0
Q96EY8	MMAB	0.234112	0.765888	0	0	0
Q9H832	UBE2Z	0.23429	0.76571	0	0	0
P23528	CFL1	0.234616	0.765384	0	0	0
Q99623	PHB2	0.236398	0.763602	0	0	0
P31937	HIBADH	0.239847	0.5	0.260153	0	0
O14880	MGST3	0.24002	0.583589	0.17639	0	0
Q9NP72	RAB18	0.241815	0.384988	0.373197	0	0
P15121	AKR1B1	0.241847	0.341325	0.416828	0	0
Q13283	G3BP1	0.244054	0.755946	0	0	0
Q13185	CBX3	0.244665	0.525816	0.229519	0	0
P83916	CBX1	0.244665	0.525816	0.229519	0	0
Q9Y277	VDAC3	0.244772	0.226476	0.153905	0.170972	0.203875
P37268	FDFT1	0.245126	0.754874	0	0	0
P45880	VDAC2	0.249668	0.404215	0.346117	0	0
Q9NR22	PRMT8	0.249782	0.750218	0	0	0
Q99615	DNAJC7	0.25	0.334713	0.415287	0	0
Q9H4I3	TRABD	0.2507	0.7493	0	0	0
Q9UBX3	SLC25A10	0.251044	0.53076	0.218196	0	0
P31947	SFN	0.251139	0.748861	0	0	0
P31350	RRM2	0.252003	0.747997	0	0	0
Q8NFH3	NUP43	0.253963	0.746037	0	0	0
P51149	RAB7A	0.25544	0.600518	0.144041	0	0
O43818	RRP9	0.258932	0.741068	0	0	0
P67809	YBX1	0.259516	0.173035	0.567449	0	0
Q71DI3	H3C13	0.259606	0.740394	0	0	0
P84243	H3-3A	0.259606	0.740394	0	0	0
P08754	GNAI3	0.26161	0.559487	0.178903	0	0
P18085	ARF4	0.262147	0.737853	0	0	0
Q9Y5K5	UCHL5	0.263505	0.456161	0.280334	0	0
Q08752	PPID	0.263925	0.365884	0.370192	0	0
Q14964	RAB39A	0.264992	0.735008	0	0	0
P30508	HLA-C	0.269222	0.730778	0	0	0
Q07000	HLA-C	0.269222	0.730778	0	0	0
P30504	HLA-C	0.269222	0.730778	0	0	0
Q29960	HLA-C	0.269222	0.730778	0	0	0
P30505	HLA-C	0.269222	0.730778	0	0	0
Q9TNN7	HLA-C	0.269222	0.730778	0	0	0
Q95604	HLA-C	0.269222	0.730778	0	0	0
Q14103	HNRNPD	0.269586	0.246849	0.483565	0	0
Q9NRV9	HEBP1	0.270753	0.729247	0	0	0
P22392	NME2	0.273892	0.726108	0	0	0
O60361	NME2P1	0.273892	0.726108	0	0	0
Q01081	U2AF1	0.274477	0.725523	0	0	0
P0DN76	#N/A	0.274477	0.725523	0	0	0
P10620	MGST1	0.274839	0.725161	0	0	0
Q0VDF9	HSPA14	0.280928	0.719072	0	0	0
Q5VT66	MTARC1	0.2814	0.7186	0	0	0
Q9H074	PAIP1	0.281748	0.718252	0	0	0
P18754	RCC1	0.282353	0.717647	0	0	0
Q9H936	SLC25A22	0.283689	0.272564	0.208685	0.235062	0
Q9H1K4	SLC25A18	0.283689	0.272564	0.208685	0.235062	0
Q8IV08	PLD3	0.284094	0.715906	0	0	0
O14732	IMPA2	0.284225	0.250986	0.464789	0	0
O94905	ERLIN2	0.285053	0.714947	0	0	0
O60701	UGDH	0.285408	0.551931	0.162661	0	0
P12268	IMPDH2	0.289354	0.710646	0	0	0
O15160	POLR1C	0.291165	0.708835	0	0	0
P84077	ARF1	0.294349	0.705651	0	0	0
P61204	ARF3	0.294349	0.705651	0	0	0
P54920	NAPA	0.294471	0.705529	0	0	0
Q9H115	NAPB	0.294471	0.705529	0	0	0
Q6PIU2	NCEH1	0.29466	0.70534	0	0	0
P51151	RAB9A	0.298151	0.701849	0	0	0
Q9NP90	RAB9B	0.298151	0.701849	0	0	0
P40937	RFC5	0.299049	0.700951	0	0	0
Q9UMR5	PPT2	0.29911	0.70089	0	0	0
Q9BQE3	TUBA1C	0.299623	0.544288	0.156089	0	0
P30453	HLA-A	0.299952	0.562141	0.137906	0	0
P30457	HLA-A	0.299952	0.562141	0.137906	0	0
P30450	HLA-A	0.299952	0.562141	0.137906	0	0
P18462	HLA-A	0.299952	0.562141	0.137906	0	0
P30456	HLA-A	0.299952	0.562141	0.137906	0	0
P63151	PPP2R2A	0.301209	0.698791	0	0	0
Q5VWZ2	LYPLAL1	0.301861	0.698139	0	0	0
Q15286	RAB35	0.3039	0.6961	0	0	0
Q9UJW0	DCTN4	0.304044	0.695956	0	0	0
P30086	PEBP1	0.304364	0.695636	0	0	0
Q8NC51	SERBP1	0.306785	0.693215	0	0	0
Q99880	H2BC13	0.307986	0.692014	0	0	0
Q99879	H2BC14	0.307986	0.692014	0	0	0
Q99877	H2BC15	0.307986	0.692014	0	0	0
Q93079	H2BC9	0.307986	0.692014	0	0	0
Q5QNW6	H2BC18	0.307986	0.692014	0	0	0
P62807	H2BC10	0.307986	0.692014	0	0	0
P58876	H2BC5	0.307986	0.692014	0	0	0
P57053	H2BC12L	0.307986	0.692014	0	0	0
O60814	H2BC12	0.307986	0.692014	0	0	0
Q16778	H2BC21	0.307986	0.692014	0	0	0
P33778	H2BC3	0.307986	0.692014	0	0	0
P23527	H2BC17	0.307986	0.692014	0	0	0
Q8N257	H2BU1	0.307986	0.692014	0	0	0
Q96A08	H2BC1	0.307986	0.692014	0	0	0
O75718	CRTAP	0.308502	0.691498	0	0	0
Q8TC12	RDH11	0.309588	0.340083	0.350329	0	0
Q7Z4H8	POGLUT3	0.3114	0.6886	0	0	0
P28482	MAPK1	0.313704	0.686296	0	0	0
P12236	SLC25A6	0.314014	0.377467	0.308519	0	0
P50613	CDK7	0.316032	0.683968	0	0	0
P61289	PSME3	0.31885	0.502765	0.178385	0	0
Q92804	TAF15	0.327293	0.672707	0	0	0
Q92820	GGH	0.328694	0.536168	0.135138	0	0
P07437	TUBB	0.329584	0.670416	0	0	0
A6NNZ2	TUBB8B	0.329584	0.670416	0	0	0
Q15165	PON2	0.332067	0.390769	0.277164	0	0
Q96J01	THOC3	0.332267	0.667733	0	0	0
P21964	COMT	0.332774	0.455756	0.21147	0	0
P05141	SLC25A5	0.332988	0.404657	0.262354	0	0
Q99873	PRMT1	0.334345	0.665655	0	0	0
P25789	PSMA4	0.334676	0.665324	0	0	0
P82673	MRPS35	0.335966	0.508949	0.155084	0	0
P62913	RPL11	0.338201	0.661799	0	0	0
P34896	SHMT1	0.339889	0.660111	0	0	0
P13693	TPT1	0.342237	0.657763	0	0	0
Q56UQ5	#N/A	0.342237	0.657763	0	0	0
Q9Y221	NIP7	0.343642	0.656358	0	0	0
Q8NBN7	RDH13	0.344342	0.283814	0.371844	0	0
Q9P258	RCC2	0.346745	0.653255	0	0	0
Q15233	NONO	0.34834	0.65166	0	0	0
Q16539	MAPK14	0.348492	0.174468	0.477041	0	0
Q15084	PDIA6	0.358219	0.641781	0	0	0
Q9Y266	NUDC	0.361938	0.638062	0	0	0
Q9H9B4	SFXN1	0.364162	0.296821	0.339017	0	0
Q9UKD2	MRTO4	0.364912	0.635088	0	0	0
P48637	GSS	0.365595	0.634405	0	0	0
Q8WUD1	RAB2B	0.372487	0.627513	0	0	0
Q16186	ADRM1	0.373747	0.626253	0	0	0
Q13637	RAB32	0.3756	0.2289	0.3955	0	0
P20337	RAB3B	0.375738	0.624262	0	0	0
P20336	RAB3A	0.375738	0.624262	0	0	0
Q14376	GALE	0.376334	0.623666	0	0	0
P04183	TK1	0.3765	0.6235	0	0	0
Q9GZT8	NIF3L1	0.3766	0.6234	0	0	0
P04792	HSPB1	0.377174	0.622826	0	0	0
P18621	RPL17	0.380671	0.457007	0.162322	0	0
Q15645	TRIP13	0.380968	0.619032	0	0	0
Q16774	GUK1	0.381959	0.618041	0	0	0
P51553	IDH3G	0.382517	0.617483	0	0	0
Q93096	PTP4A1	0.383982	0.616018	0	0	0
P40616	ARL1	0.384649	0.373559	0.241792	0	0
Q9H9J2	MRPL44	0.385409	0.614591	0	0	0
P10768	ESD	0.385579	0.614421	0	0	0
P20339	RAB5A	0.3868	0.6132	0	0	0
Q9BYX7	POTEKP	0.389387	0.610613	0	0	0
P57723	PCBP4	0.392031	0.607969	0	0	0
O14828	SCAMP3	0.392375	0.313224	0.294402	0	0
P62834	RAP1A	0.394053	0.311012	0.294935	0	0
P61224	RAP1B	0.394053	0.311012	0.294935	0	0
A6NIZ1	#N/A	0.394053	0.311012	0.294935	0	0
Q02543	RPL18A	0.394999	0.605001	0	0	0
Q9BTZ2	DHRS4	0.396023	0.603977	0	0	0
Q6PKH6	DHRS4L2	0.396023	0.603977	0	0	0
P61006	RAB8A	0.399595	0.600405	0	0	0
Q92930	RAB8B	0.399595	0.600405	0	0	0
P35637	FUS	0.404075	0.595925	0	0	0
Q9UM00	TMCO1	0.406224	0.593776	0	0	0
Q99729	HNRNPAB	0.406887	0.593113	0	0	0
P12004	PCNA	0.408496	0.591504	0	0	0
O00154	ACOT7	0.4089	0.5911	0	0	0
O14925	TIMM23	0.412841	0.587159	0	0	0
Q7L2H7	EIF3M	0.412939	0.246485	0.340576	0	0
Q9UGV2	NDRG3	0.413253	0.586747	0	0	0
P27361	MAPK3	0.413767	0.586233	0	0	0
O15400	STX7	0.4166	0.5834	0	0	0
P46782	RPS5	0.417358	0.416196	0.166445	0	0
P09211	GSTP1	0.418424	0.581576	0	0	0
Q8NBX0	SCCPDH	0.419273	0.580727	0	0	0
Q8NFH4	NUP37	0.421604	0.578396	0	0	0
O75223	GGCT	0.421799	0.578201	0	0	0
Q15024	EXOSC7	0.4222	0.5778	0	0	0
Q9UL25	RAB21	0.42463	0.333704	0.241667	0	0
Q15185	PTGES3	0.42475	0.57525	0	0	0
Q7Z3B4	NUP54	0.424788	0.575212	0	0	0
P35232	PHB1	0.430839	0.569161	0	0	0
Q9BTM1	H2AJ	0.432508	0.567492	0	0	0
Q93077	H2AC6	0.432508	0.567492	0	0	0
Q7L7L0	H2AW	0.432508	0.567492	0	0	0
Q6FI13	H2AC18	0.432508	0.567492	0	0	0
P20671	H2AC7	0.432508	0.567492	0	0	0
P0C0S8	H2AC11	0.432508	0.567492	0	0	0
P04908	H2AC4	0.432508	0.567492	0	0	0
Q96QV6	H2AC1	0.432508	0.567492	0	0	0
P57088	TMEM33	0.433559	0.39749	0.168951	0	0
Q96EE3	SEH1L	0.433707	0.566293	0	0	0
P62333	PSMC6	0.434161	0.565839	0	0	0
P51148	RAB5C	0.434327	0.565673	0	0	0
Q969X5	ERGIC1	0.435042	0.564958	0	0	0
Q15365	PCBP1	0.43869	0.56131	0	0	0
P30740	SERPINB1	0.441096	0.558904	0	0	0
P50453	SERPINB9	0.441096	0.558904	0	0	0
O95716	RAB3D	0.442344	0.557656	0	0	0
Q96E17	RAB3C	0.442344	0.557656	0	0	0
P10301	RRAS	0.442714	0.557286	0	0	0
P62070	RRAS2	0.442714	0.557286	0	0	0
P78330	PSPH	0.445647	0.554353	0	0	0
Q16740	CLPP	0.446954	0.553046	0	0	0
Q5VW32	BROX	0.448	0.552	0	0	0
P13995	MTHFD2	0.449604	0.550396	0	0	0
P00568	AK1	0.45	0.55	0	0	0
P39687	ANP32A	0.450075	0.549925	0	0	0
O43423	ANP32C	0.450075	0.549925	0	0	0
C9JRZ8	AKR1B15	0.450206	0.549794	0	0	0
Q9Y2Z0	SUGT1	0.452258	0.547742	0	0	0
Q92597	NDRG1	0.4538	0.5462	0	0	0
Q9BWD1	ACAT2	0.454198	0.545802	0	0	0
Q9NY93	DDX56	0.459907	0.540093	0	0	0
Q9NVJ2	ARL8B	0.460342	0.539658	0	0	0
Q07812	BAX	0.4612	0.5388	0	0	0
Q13636	RAB31	0.464712	0.535288	0	0	0
Q9UL26	RAB22A	0.464712	0.535288	0	0	0
Q92882	OSTF1	0.464919	0.535081	0	0	0
P49903	SEPHS1	0.465424	0.534576	0	0	0
Q8WUY1	THEM6	0.466791	0.533209	0	0	0
P62937	PPIA	0.467072	0.532928	0	0	0
Q9Y536	PPIAL4A	0.467072	0.532928	0	0	0
P0DN26	PPIAL4F	0.467072	0.532928	0	0	0
F5H284	PPIAL4D	0.467072	0.532928	0	0	0
A0A0B4J2A2	PPIAL4C	0.467072	0.532928	0	0	0
A0A075B759	PPIAL4E	0.467072	0.532928	0	0	0
P0DN37	PPIAL4G	0.467072	0.532928	0	0	0
P62280	RPS11	0.468202	0.531798	0	0	0
Q15366	PCBP2	0.468871	0.531129	0	0	0
Q9NX63	CHCHD3	0.4722	0.5278	0	0	0
P19623	SRM	0.473015	0.526985	0	0	0
Q14558	PRPSAP1	0.47423	0.326347	0.199423	0	0
Q8NE86	MCU	0.475209	0.524791	0	0	0
P60953	CDC42	0.479205	0.520795	0	0	0
P22234	PAICS	0.482864	0.517136	0	0	0
P09110	ACAA1	0.485549	0.514451	0	0	0
Q8WUK0	PTPMT1	0.485555	0.514445	0	0	0
Q8NEZ5	FBXO22	0.485568	0.514432	0	0	0
P19784	CSNK2A2	0.486567	0.513433	0	0	0
Q00325	SLC25A3	0.489726	0.510274	0	0	0
P48739	PITPNB	0.489775	0.510225	0	0	0
P23396	RPS3	0.489936	0.510064	0	0	0
Q9NZ01	TECR	0.491987	0.213764	0.294249	0	0
Q9Y6C9	MTCH2	0.492259	0.507741	0	0	0
Q13155	AIMP2	0.49389	0.50611	0	0	0
P16219	ACADS	0.5	0.5	0	0	0
P46736	BRCC3	0.5	0.5	0	0	0
P49590	HARS2	0.5	0.5	0	0	0
Q15005	SPCS2	0.5	0.5	0	0	0
Q7L523	RRAGA	0.5	0.5	0	0	0
Q9H9P8	L2HGDH	0.5	0.5	0	0	0
Q9Y276	BCS1L	0.5	0.5	0	0	0
Q9NR45	NANS	0.503161	0.496839	0	0	0
P15531	NME1	0.505265	0.494735	0	0	0
P04818	TYMS	0.505291	0.494709	0	0	0
O96000	NDUFB10	0.505839	0.306022	0.188139	0	0
P27695	APEX1	0.507556	0.492444	0	0	0
O00273	DFFA	0.508348	0.491652	0	0	0
Q14116	IL18	0.510106	0.489894	0	0	0
P16930	FAH	0.512089	0.487911	0	0	0
P08134	RHOC	0.512758	0.210324	0.276918	0	0
Q96I24	FUBP3	0.51439	0.48561	0	0	0
P63244	RACK1	0.515372	0.484628	0	0	0
Q9Y305	ACOT9	0.517723	0.482277	0	0	0
Q8TED1	GPX8	0.51805	0.48195	0	0	0
P61020	RAB5B	0.518095	0.481905	0	0	0
O75131	CPNE3	0.519014	0.480986	0	0	0
Q96FN4	CPNE2	0.519014	0.480986	0	0	0
Q8IYJ1	CPNE9	0.519014	0.480986	0	0	0
O95741	CPNE6	0.519014	0.480986	0	0	0
O43172	PRPF4	0.521027	0.478973	0	0	0
P25787	PSMA2	0.523769	0.476231	0	0	0
P08559	PDHA1	0.524368	0.475632	0	0	0
P29803	PDHA2	0.524368	0.475632	0	0	0
Q9BWM7	SFXN3	0.524523	0.475477	0	0	0
Q9UNX3	RPL26L1	0.525051	0.474949	0	0	0
P07203	GPX1	0.525235	0.201487	0.273279	0	0
Q9HB71	CACYBP	0.528636	0.471364	0	0	0
P42330	AKR1C3	0.529057	0.351527	0.119417	0	0
Q04828	AKR1C1	0.529057	0.351527	0.119417	0	0
P17516	AKR1C4	0.529057	0.351527	0.119417	0	0
P52895	AKR1C2	0.529057	0.351527	0.119417	0	0
Q9NX46	ADPRS	0.530298	0.469702	0	0	0
P36952	SERPINB5	0.531137	0.468863	0	0	0
Q562R1	ACTBL2	0.533361	0.466639	0	0	0
Q8WVM0	TFB1M	0.534905	0.465095	0	0	0
P55039	DRG2	0.535061	0.464939	0	0	0
P62191	PSMC1	0.535547	0.464453	0	0	0
Q9UHG3	PCYOX1	0.536855	0.463145	0	0	0
Q9NUQ9	CYRIB	0.537304	0.462696	0	0	0
Q9H0Q0	CYRIA	0.537304	0.462696	0	0	0
Q9BRX2	PELO	0.538671	0.461329	0	0	0
Q9Y2Q3	GSTK1	0.53894	0.46106	0	0	0
O00148	DDX39A	0.541434	0.458566	0	0	0
P68104	EEF1A1	0.541577	0.458423	0	0	0
Q5VTE0	EEF1A1P5	0.541577	0.458423	0	0	0
Q99497	PARK7	0.543788	0.456212	0	0	0
O00743	PPP6C	0.544801	0.455199	0	0	0
Q96DG6	CMBL	0.547492	0.452508	0	0	0
P23381	WARS1	0.548478	0.451522	0	0	0
Q9Y285	FARSA	0.549421	0.450579	0	0	0
Q01105	SET	0.549719	0.450281	0	0	0
P0DME0	SETSIP	0.549719	0.450281	0	0	0
P62495	ETF1	0.552202	0.447798	0	0	0
Q9Y5M8	SRPRB	0.554486	0.445514	0	0	0
Q9HB07	MYG1	0.556024	0.443976	0	0	0
P46781	RPS9	0.558247	0.441753	0	0	0
O75607	NPM3	0.562188	0.230306	0.207506	0	0
Q9Y2T2	AP3M1	0.563018	0.436982	0	0	0
P53677	AP3M2	0.563018	0.436982	0	0	0
P47756	CAPZB	0.563324	0.436676	0	0	0
P60763	RAC3	0.565664	0.434336	0	0	0
Q9UMS4	PRPF19	0.568052	0.431948	0	0	0
P11310	ACADM	0.572443	0.427557	0	0	0
P61019	RAB2A	0.572854	0.427146	0	0	0
Q8N684	CPSF7	0.5744	0.4256	0	0	0
O75874	IDH1	0.575826	0.424174	0	0	0
P62633	CNBP	0.576046	0.423954	0	0	0
O75947	ATP5PD	0.578098	0.421902	0	0	0
P61916	NPC2	0.581837	0.192219	0.225944	0	0
Q9UBE0	SAE1	0.584086	0.415914	0	0	0
O43684	BUB3	0.584171	0.415829	0	0	0
Q9Y2S7	POLDIP2	0.586617	0.413383	0	0	0
Q7L5N1	COPS6	0.586779	0.413221	0	0	0
P61011	SRP54	0.587057	0.412943	0	0	0
P30084	ECHS1	0.589601	0.410399	0	0	0
Q9NRN7	AASDHPPT	0.591549	0.227062	0.181388	0	0
P53007	SLC25A1	0.591607	0.408393	0	0	0
Q9ULC4	MCTS1	0.591637	0.408363	0	0	0
P61106	RAB14	0.592562	0.407438	0	0	0
Q96I99	SUCLG2	0.593977	0.406023	0	0	0
P39023	RPL3	0.596131	0.234077	0.169792	0	0
Q92901	RPL3L	0.596131	0.234077	0.169792	0	0
P61081	UBE2M	0.59876	0.40124	0	0	0
P08670	VIM	0.598824	0.401176	0	0	0
P41219	PRPH	0.598824	0.401176	0	0	0
P14136	GFAP	0.598824	0.401176	0	0	0
P04083	ANXA1	0.599353	0.400647	0	0	0
P17987	TCP1	0.60045	0.39955	0	0	0
P17612	PRKACA	0.601514	0.398486	0	0	0
Q9HCN4	GPN1	0.604745	0.395255	0	0	0
P50213	IDH3A	0.607229	0.392771	0	0	0
Q9P0L0	VAPA	0.610618	0.389382	0	0	0
P30041	PRDX6	0.611021	0.388979	0	0	0
P61026	RAB10	0.611434	0.388566	0	0	0
P00352	ALDH1A1	0.613387	0.386613	0	0	0
P47895	ALDH1A3	0.613387	0.386613	0	0	0
O94788	ALDH1A2	0.613387	0.386613	0	0	0
P46779	RPL28	0.613891	0.386109	0	0	0
Q9Y230	RUVBL2	0.614441	0.385559	0	0	0
P35998	PSMC2	0.615247	0.384753	0	0	0
P09429	HMGB1	0.615346	0.384654	0	0	0
B2RPK0	HMGB1P1	0.615346	0.384654	0	0	0
Q9Y376	CAB39	0.6155	0.3845	0	0	0
P08729	KRT7	0.616881	0.383119	0	0	0
P09972	ALDOC	0.619066	0.380934	0	0	0
P15880	RPS2	0.619463	0.380537	0	0	0
P61626	LYZ	0.621129	0.378871	0	0	0
O95861	BPNT1	0.621681	0.378319	0	0	0
Q9H4M9	EHD1	0.623968	0.376032	0	0	0
Q9NZN3	EHD3	0.623968	0.376032	0	0	0
Q9H223	EHD4	0.623968	0.376032	0	0	0
Q9NZN4	EHD2	0.623968	0.376032	0	0	0
O95747	OXSR1	0.627539	0.372461	0	0	0
P62140	PPP1CB	0.632263	0.367737	0	0	0
Q29940	HLA-B	0.632949	0.367051	0	0	0
P30493	HLA-B	0.632949	0.367051	0	0	0
P30492	HLA-B	0.632949	0.367051	0	0	0
Q8TDN6	BRIX1	0.633421	0.366579	0	0	0
P22087	FBL	0.637859	0.362141	0	0	0
P51991	HNRNPA3	0.638776	0.361224	0	0	0
Q9UL46	PSME2	0.644509	0.355491	0	0	0
P01111	NRAS	0.649335	0.178894	0.171771	0	0
P01116	KRAS	0.649335	0.178894	0.171771	0	0
P01112	HRAS	0.649335	0.178894	0.171771	0	0
O95571	ETHE1	0.650342	0.349658	0	0	0
Q9UNM6	PSMD13	0.652339	0.347661	0	0	0
Q9HCC0	MCCC2	0.654199	0.345801	0	0	0
P10809	HSPD1	0.654386	0.345614	0	0	0
Q53GQ0	HSD17B12	0.65452	0.34548	0	0	0
P78406	RAE1	0.656498	0.343502	0	0	0
Q9NS69	TOMM22	0.659027	0.340973	0	0	0
P46776	RPL27A	0.659162	0.340838	0	0	0
Q96IR7	HPDL	0.66283	0.33717	0	0	0
P09382	LGALS1	0.66369	0.130781	0.20553	0	0
Q96GK7	FAHD2A	0.66391	0.33609	0	0	0
Q6P2I3	FAHD2B	0.66391	0.33609	0	0	0
P07741	APRT	0.671218	0.328782	0	0	0
P62753	RPS6	0.674222	0.325778	0	0	0
P49770	EIF2B2	0.676382	0.323618	0	0	0
P04406	GAPDH	0.679342	0.320658	0	0	0
P63000	RAC1	0.68123	0.31877	0	0	0
P15153	RAC2	0.68123	0.31877	0	0	0
P11117	ACP2	0.683871	0.316129	0	0	0
Q9H0C2	SLC25A31	0.68524	0.31476	0	0	0
O43324	EEF1E1	0.686563	0.145752	0.167685	0	0
Q9NUI1	DECR2	0.687605	0.312395	0	0	0
P62917	RPL8	0.687822	0.312178	0	0	0
Q07666	KHDRBS1	0.687983	0.312017	0	0	0
P61586	RHOA	0.688511	0.311489	0	0	0
P13861	PRKAR2A	0.690373	0.309627	0	0	0
P31323	PRKAR2B	0.690373	0.309627	0	0	0
P12235	SLC25A4	0.691481	0.308519	0	0	0
Q13868	EXOSC2	0.691591	0.308409	0	0	0
P35270	SPR	0.692318	0.307682	0	0	0
Q9UBW8	COPS7A	0.693999	0.306001	0	0	0
P30085	CMPK1	0.701672	0.298328	0	0	0
P04075	ALDOA	0.70195	0.29805	0	0	0
P05062	ALDOB	0.70195	0.29805	0	0	0
Q9NUU7	DDX19A	0.704628	0.295372	0	0	0
Q9UHL0	DDX25	0.704628	0.295372	0	0	0
P52597	HNRNPF	0.70491	0.29509	0	0	0
O14908	GIPC1	0.706332	0.293668	0	0	0
P05534	HLA-A	0.706526	0.293474	0	0	0
P30447	HLA-A	0.706526	0.293474	0	0	0
P61247	RPS3A	0.707518	0.292482	0	0	0
Q15785	TOMM34	0.708938	0.291062	0	0	0
Q13148	TARDBP	0.71073	0.28927	0	0	0
P00492	HPRT1	0.713426	0.286574	0	0	0
Q5VT79	ANXA8L1	0.713552	0.286448	0	0	0
P13928	ANXA8	0.713552	0.286448	0	0	0
P11802	CDK4	0.714466	0.285534	0	0	0
O43488	AKR7A2	0.717115	0.282885	0	0	0
Q3MHD2	LSM12	0.719292	0.280708	0	0	0
Q8NF37	LPCAT1	0.722945	0.277055	0	0	0
P30511	HLA-F	0.725912	0.274088	0	0	0
Q9UJZ1	STOML2	0.727596	0.272404	0	0	0
P10316	HLA-A	0.729613	0.270387	0	0	0
P01892	HLA-A	0.729613	0.270387	0	0	0
Q92769	HDAC2	0.730307	0.269693	0	0	0
P54619	PRKAG1	0.731125	0.15143	0.117445	0	0
Q9H3N1	TMX1	0.733865	0.266135	0	0	0
Q9HBL8	NMRAL1	0.736887	0.263113	0	0	0
P04899	GNAI2	0.741726	0.258274	0	0	0
P67936	TPM4	0.745634	0.254366	0	0	0
P35900	KRT20	0.746321	0.253679	0	0	0
P51398	DAP3	0.746538	0.253462	0	0	0
Q9Y676	MRPS18B	0.747308	0.252692	0	0	0
P83731	RPL24	0.748304	0.251696	0	0	0
P07711	CTSL	0.74994	0.25006	0	0	0
P43235	CTSK	0.74994	0.25006	0	0	0
O60911	CTSV	0.74994	0.25006	0	0	0
O95299	NDUFA10	0.753393	0.246607	0	0	0
P43686	PSMC4	0.753509	0.246491	0	0	0
O00487	PSMD14	0.753607	0.246393	0	0	0
P49411	TUFM	0.756536	0.243464	0	0	0
O60256	PRPSAP2	0.759093	0.240907	0	0	0
O00232	PSMD12	0.759439	0.240561	0	0	0
Q99714	HSD17B10	0.762873	0.237127	0	0	0
P20338	RAB4A	0.763	0.237	0	0	0
P61018	RAB4B	0.763	0.237	0	0	0
Q8NBQ5	HSD17B11	0.763863	0.236137	0	0	0
Q6IBS0	TWF2	0.764298	0.235702	0	0	0
P62136	PPP1CA	0.766927	0.233073	0	0	0
P62826	RAN	0.768089	0.231911	0	0	0
Q9Y3F4	STRAP	0.769039	0.230961	0	0	0
O75396	SEC22B	0.769114	0.230886	0	0	0
Q07020	RPL18	0.772771	0.227229	0	0	0
Q8NHP1	AKR7L	0.77308	0.22692	0	0	0
Q12972	PPP1R8	0.774477	0.225523	0	0	0
Q9NZL4	HSPBP1	0.780807	0.219193	0	0	0
P27635	RPL10	0.781676	0.218324	0	0	0
Q96L21	RPL10L	0.781676	0.218324	0	0	0
Q96A33	CCDC47	0.783232	0.216768	0	0	0
Q16222	UAP1	0.783536	0.216464	0	0	0
P46778	RPL21	0.783567	0.216433	0	0	0
P60891	PRPS1	0.785975	0.214025	0	0	0
Q9NPD3	EXOSC4	0.789847	0.210153	0	0	0
Q9NV31	IMP3	0.789855	0.210145	0	0	0
P48444	ARCN1	0.790004	0.209996	0	0	0
P67775	PPP2CA	0.790871	0.209129	0	0	0
P62714	PPP2CB	0.790871	0.209129	0	0	0
Q9Y315	DERA	0.791891	0.208109	0	0	0
P68363	TUBA1B	0.794128	0.205872	0	0	0
Q9UI10	EIF2B4	0.794958	0.205042	0	0	0
O00764	PDXK	0.796067	0.203933	0	0	0
P62249	RPS16	0.797124	0.202876	0	0	0
O14684	PTGES	0.800889	0.199111	0	0	0
P22061	PCMT1	0.800981	0.199019	0	0	0
Q9UMR2	DDX19B	0.802157	0.197843	0	0	0
P62745	RHOB	0.802578	0.197422	0	0	0
Q02878	RPL6	0.802839	0.197161	0	0	0
Q96HS1	PGAM5	0.803423	0.196577	0	0	0
Q6DKI1	RPL7L1	0.8043	0.1957	0	0	0
Q3ZCQ8	TIMM50	0.804735	0.195265	0	0	0
P78346	RPP30	0.806866	0.193134	0	0	0
Q96C23	GALM	0.807	0.193	0	0	0
Q9Y570	PPME1	0.80724	0.19276	0	0	0
Q3KQV9	UAP1L1	0.810939	0.189061	0	0	0
P59998	ARPC4	0.813734	0.186266	0	0	0
P17980	PSMC3	0.814686	0.185314	0	0	0
Q9Y265	RUVBL1	0.815203	0.184797	0	0	0
Q15126	PMVK	0.8166	0.1834	0	0	0
O60664	PLIN3	0.824411	0.175589	0	0	0
Q00796	SORD	0.824683	0.175317	0	0	0
Q06323	PSME1	0.825272	0.174728	0	0	0
Q6YN16	HSDL2	0.825902	0.174098	0	0	0
P84095	RHOG	0.826862	0.173138	0	0	0
O15533	TAPBP	0.828248	0.171752	0	0	0
Q9BZX2	UCK2	0.828635	0.171365	0	0	0
Q9HA47	UCK1	0.828635	0.171365	0	0	0
O75340	PDCD6	0.8301	0.1699	0	0	0
P62244	RPS15A	0.830415	0.169585	0	0	0
Q9NQT5	EXOSC3	0.831346	0.168654	0	0	0
Q14165	MLEC	0.833195	0.166805	0	0	0
Q9BQ75	CMSS1	0.8348	0.1652	0	0	0
O76071	CIAO1	0.836843	0.163157	0	0	0
Q99439	CNN2	0.839829	0.160171	0	0	0
Q13247	SRSF6	0.841459	0.158541	0	0	0
P30519	HMOX2	0.842294	0.157706	0	0	0
P11908	PRPS2	0.845715	0.154285	0	0	0
P32969	RPL9	0.849275	0.150725	0	0	0
O14656	TOR1A	0.849333	0.150667	0	0	0
P50991	CCT4	0.849409	0.150591	0	0	0
P40227	CCT6A	0.849743	0.150257	0	0	0
Q9BYG3	NIFK	0.851025	0.148975	0	0	0
Q01581	HMGCS1	0.853459	0.146541	0	0	0
P54868	HMGCS2	0.853459	0.146541	0	0	0
P36542	ATP5F1C	0.858907	0.141093	0	0	0
P61086	UBE2K	0.862752	0.137248	0	0	0
Q9NUL7	DDX28	0.869716	0.130284	0	0	0
O00151	PDLIM1	0.87517	0.12483	0	0	0
Q9P015	MRPL15	0.876646	0.123354	0	0	0
Q9BZZ5	API5	0.883478	0.116522	0	0	0
Q92552	MRPS27	0.888546	0.111454	0	0	0
P02533	KRT14	1	0	0	0	0
Q99456	KRT12	1	0	0	0	0
Q7Z3Y9	KRT26	1	0	0	0	0
P02649	APOE	1	0	0	0	0
Q14CN4	KRT72	1	0	0	0	0
A4D1E9	GTPBP10	1	0	0	0	0
A6NDG6	PGP	1	0	0	0	0
O00165	HAX1	1	0	0	0	0
O00217	NDUFS8	1	0	0	0	0
O00231	PSMD11	1	0	0	0	0
O00233	PSMD9	1	0	0	0	0
O00264	PGRMC1	1	0	0	0	0
O00299	CLIC1	1	0	0	0	0
O00560	SDCBP	1	0	0	0	0
O00625	PIR	1	0	0	0	0
O00629	KPNA4	1	0	0	0	0
O14530	TXNDC9	1	0	0	0	0
O14579	COPE	1	0	0	0	0
O14818	PSMA7	1	0	0	0	0
Q8TAA3	PSMA8	1	0	0	0	0
O14929	HAT1	1	0	0	0	0
P19105	MYL12A	1	0	0	0	0
O14950	MYL12B	1	0	0	0	0
P24844	MYL9	1	0	0	0	0
O15143	ARPC1B	1	0	0	0	0
O15145	ARPC3	1	0	0	0	0
O15173	PGRMC2	1	0	0	0	0
O15347	HMGB3	1	0	0	0	0
O15372	EIF3H	1	0	0	0	0
O15498	YKT6	1	0	0	0	0
O43148	RNMT	1	0	0	0	0
O43175	PHGDH	1	0	0	0	0
O43242	PSMD3	1	0	0	0	0
O43396	TXNL1	1	0	0	0	0
O43399	TPD52L2	1	0	0	0	0
O43598	DNPH1	1	0	0	0	0
O43660	PLRG1	1	0	0	0	0
O43681	GET3	1	0	0	0	0
O43809	NUDT21	1	0	0	0	0
O43813	LANCL1	1	0	0	0	0
O43865	AHCYL1	1	0	0	0	0
O60547	GMDS	1	0	0	0	0
O60684	KPNA6	1	0	0	0	0
O15131	KPNA5	1	0	0	0	0
O60762	DPM1	1	0	0	0	0
P06899	H2BC11	1	0	0	0	0
O60828	PQBP1	1	0	0	0	0
O60832	DKC1	1	0	0	0	0
O60884	DNAJA2	1	0	0	0	0
O75208	COQ9	1	0	0	0	0
O75367	MACROH2A1	1	0	0	0	0
O75414	NME6	1	0	0	0	0
O75436	VPS26A	1	0	0	0	0
O75489	NDUFS3	1	0	0	0	0
O75521	ECI2	1	0	0	0	0
O75616	ERAL1	1	0	0	0	0
O75792	RNASEH2A	1	0	0	0	0
O75955	FLOT1	1	0	0	0	0
O76003	GLRX3	1	0	0	0	0
O76021	RSL1D1	1	0	0	0	0
O95070	YIF1A	1	0	0	0	0
O95232	LUC7L3	1	0	0	0	0
O95292	VAPB	1	0	0	0	0
O95336	PGLS	1	0	0	0	0
O95456	PSMG1	1	0	0	0	0
O95478	NSA2	1	0	0	0	0
O95551	TDP2	1	0	0	0	0
O95707	POP4	1	0	0	0	0
O95816	BAG2	1	0	0	0	0
O95900	TRUB2	1	0	0	0	0
O95989	NUDT3	1	0	0	0	0
O96019	ACTL6A	1	0	0	0	0
O94805	ACTL6B	1	0	0	0	0
P00338	LDHA	1	0	0	0	0
Q6ZMR3	LDHAL6A	1	0	0	0	0
P07864	LDHC	1	0	0	0	0
P00387	CYB5R3	1	0	0	0	0
P00390	GSR	1	0	0	0	0
P00403	MT-CO2	1	0	0	0	0
P00558	PGK1	1	0	0	0	0
P00966	ASS1	1	0	0	0	0
P02792	FTL	1	0	0	0	0
P02794	FTH1	1	0	0	0	0
P04040	CAT	1	0	0	0	0
P04179	SOD2	1	0	0	0	0
P04181	OAT	1	0	0	0	0
P04632	CAPNS1	1	0	0	0	0
Q96L46	CAPNS2	1	0	0	0	0
P11488	GNAT1	1	0	0	0	0
P09471	GNAO1	1	0	0	0	0
P19087	GNAT2	1	0	0	0	0
A8MTJ3	GNAT3	1	0	0	0	0
P38405	GNAL	1	0	0	0	0
P16104	H2AX	1	0	0	0	0
P05091	ALDH2	1	0	0	0	0
P05198	EIF2S1	1	0	0	0	0
P05388	RPLP0	1	0	0	0	0
Q8NHW5	RPLP0P6	1	0	0	0	0
P05455	SSB	1	0	0	0	0
Q14525	KRT33B	1	0	0	0	0
Q15323	KRT31	1	0	0	0	0
P06493	CDK1	1	0	0	0	0
P06730	EIF4E	1	0	0	0	0
P06733	ENO1	1	0	0	0	0
P06748	NPM1	1	0	0	0	0
P06753	TPM3	1	0	0	0	0
P07195	LDHB	1	0	0	0	0
P07237	P4HB	1	0	0	0	0
P07339	CTSD	1	0	0	0	0
P07355	ANXA2	1	0	0	0	0
A6NMY6	ANXA2P2	1	0	0	0	0
Q9H4B7	TUBB1	1	0	0	0	0
P07737	PFN1	1	0	0	0	0
Q58FG1	HSP90AA4P	1	0	0	0	0
P07910	HNRNPC	1	0	0	0	0
P0DMR1	HNRNPCL4	1	0	0	0	0
O60812	HNRNPCL1	1	0	0	0	0
B7ZW38	HNRNPCL3	1	0	0	0	0
B2RXH8	HNRNPCL2	1	0	0	0	0
Q86SE5	RALYL	1	0	0	0	0
P08579	SNRPB2	1	0	0	0	0
P08708	RPS17	1	0	0	0	0
P08758	ANXA5	1	0	0	0	0
P09001	MRPL3	1	0	0	0	0
P09012	SNRPA	1	0	0	0	0
P09104	ENO2	1	0	0	0	0
P09417	QDPR	1	0	0	0	0
P09488	GSTM1	1	0	0	0	0
Q03013	GSTM4	1	0	0	0	0
P09622	DLD	1	0	0	0	0
Q32P51	HNRNPA1L2	1	0	0	0	0
P09661	SNRPA1	1	0	0	0	0
P62979	RPS27A	1	0	0	0	0
P0CG47	UBB	1	0	0	0	0
P10644	PRKAR1A	1	0	0	0	0
P11172	UMPS	1	0	0	0	0
P11177	PDHB	1	0	0	0	0
P11233	RALA	1	0	0	0	0
P11279	LAMP1	1	0	0	0	0
P11413	G6PD	1	0	0	0	0
P11766	ADH5	1	0	0	0	0
P12081	HARS1	1	0	0	0	0
P12277	CKB	1	0	0	0	0
P06732	CKM	1	0	0	0	0
P12532	CKMT1A	1	0	0	0	0
P17540	CKMT2	1	0	0	0	0
P12955	PEPD	1	0	0	0	0
P13489	RNH1	1	0	0	0	0
P13674	P4HA1	1	0	0	0	0
P13804	ETFA	1	0	0	0	0
P13984	GTF2F2	1	0	0	0	0
P14550	AKR1A1	1	0	0	0	0
P14618	PKM	1	0	0	0	0
P30613	PKLR	1	0	0	0	0
P63162	SNRPN	1	0	0	0	0
P14678	SNRPB	1	0	0	0	0
Q8WVV9	HNRNPLL	1	0	0	0	0
P14868	DARS1	1	0	0	0	0
P15328	FOLR1	1	0	0	0	0
P15559	NQO1	1	0	0	0	0
P15927	RPA2	1	0	0	0	0
P16083	NQO2	1	0	0	0	0
P16152	CBR1	1	0	0	0	0
P16402	H1-3	1	0	0	0	0
P22612	PRKACG	1	0	0	0	0
P17931	LGALS3	1	0	0	0	0
P18031	PTPN1	1	0	0	0	0
P18124	RPL7	1	0	0	0	0
P18669	PGAM1	1	0	0	0	0
P15259	PGAM2	1	0	0	0	0
Q8N0Y7	PGAM4	1	0	0	0	0
P19387	POLR2C	1	0	0	0	0
P19388	POLR2E	1	0	0	0	0
P19404	NDUFV2	1	0	0	0	0
P20340	RAB6A	1	0	0	0	0
Q9NRW1	RAB6B	1	0	0	0	0
P21266	GSTM3	1	0	0	0	0
P46439	GSTM5	1	0	0	0	0
P21281	ATP6V1B2	1	0	0	0	0
P15313	ATP6V1B1	1	0	0	0	0
P21283	ATP6V1C1	1	0	0	0	0
P21291	CSRP1	1	0	0	0	0
P21796	VDAC1	1	0	0	0	0
P22626	HNRNPA2B1	1	0	0	0	0
P22695	UQCRC2	1	0	0	0	0
P22830	FECH	1	0	0	0	0
P23526	AHCY	1	0	0	0	0
P23919	DTYMK	1	0	0	0	0
P24534	EEF1B2	1	0	0	0	0
P24752	ACAT1	1	0	0	0	0
P24863	CCNC	1	0	0	0	0
P24941	CDK2	1	0	0	0	0
P25398	RPS12	1	0	0	0	0
P25685	DNAJB1	1	0	0	0	0
P25786	PSMA1	1	0	0	0	0
P25788	PSMA3	1	0	0	0	0
P26196	DDX6	1	0	0	0	0
P26368	U2AF2	1	0	0	0	0
P26373	RPL13	1	0	0	0	0
P26583	HMGB2	1	0	0	0	0
P26599	PTBP1	1	0	0	0	0
O95758	PTBP3	1	0	0	0	0
P26641	EEF1G	1	0	0	0	0
P27105	STOM	1	0	0	0	0
P27348	YWHAQ	1	0	0	0	0
P27797	CALR	1	0	0	0	0
P28065	PSMB9	1	0	0	0	0
P28066	PSMA5	1	0	0	0	0
P28072	PSMB6	1	0	0	0	0
P28838	LAP3	1	0	0	0	0
P29218	IMPA1	1	0	0	0	0
P29692	EEF1D	1	0	0	0	0
O95837	GNA14	1	0	0	0	0
P30040	ERP29	1	0	0	0	0
P30048	PRDX3	1	0	0	0	0
P30050	RPL12	1	0	0	0	0
P30101	PDIA3	1	0	0	0	0
P30419	NMT1	1	0	0	0	0
O60551	NMT2	1	0	0	0	0
P30533	LRPAP1	1	0	0	0	0
P30566	ADSL	1	0	0	0	0
P30626	SRI	1	0	0	0	0
P30837	ALDH1B1	1	0	0	0	0
P31153	MAT2A	1	0	0	0	0
Q00266	MAT1A	1	0	0	0	0
Q7LG56	RRM2B	1	0	0	0	0
P31689	DNAJA1	1	0	0	0	0
P31942	HNRNPH3	1	0	0	0	0
P31943	HNRNPH1	1	0	0	0	0
P55795	HNRNPH2	1	0	0	0	0
P31946	YWHAB	1	0	0	0	0
P32119	PRDX2	1	0	0	0	0
P32322	PYCR1	1	0	0	0	0
P32929	CTH	1	0	0	0	0
P34897	SHMT2	1	0	0	0	0
P35237	SERPINB6	1	0	0	0	0
P35249	RFC4	1	0	0	0	0
P35613	BSG	1	0	0	0	0
P35659	DEK	1	0	0	0	0
P35914	HMGCL	1	0	0	0	0
P36507	MAP2K2	1	0	0	0	0
P36543	ATP6V1E1	1	0	0	0	0
Q96A05	ATP6V1E2	1	0	0	0	0
P36871	PGM1	1	0	0	0	0
P36957	DLST	1	0	0	0	0
P37235	HPCAL1	1	0	0	0	0
P84074	HPCA	1	0	0	0	0
P61601	NCALD	1	0	0	0	0
P37802	TAGLN2	1	0	0	0	0
Q9UI15	TAGLN3	1	0	0	0	0
P37837	TALDO1	1	0	0	0	0
P38117	ETFB	1	0	0	0	0
P38919	EIF4A3	1	0	0	0	0
P39748	FEN1	1	0	0	0	0
P40261	NNMT	1	0	0	0	0
P40429	RPL13A	1	0	0	0	0
P40925	MDH1	1	0	0	0	0
P40926	MDH2	1	0	0	0	0
P41091	EIF2S3	1	0	0	0	0
Q2VIR3	EIF2S3B	1	0	0	0	0
P41227	NAA10	1	0	0	0	0
Q9BSU3	NAA11	1	0	0	0	0
P42025	ACTR1B	1	0	0	0	0
P42167	TMPO	1	0	0	0	0
P42765	ACAA2	1	0	0	0	0
P43034	PAFAH1B1	1	0	0	0	0
P43307	SSR1	1	0	0	0	0
P43490	NAMPT	1	0	0	0	0
P45877	PPIC	1	0	0	0	0
P46108	CRK	1	0	0	0	0
P46109	CRKL	1	0	0	0	0
P46777	RPL5	1	0	0	0	0
P46783	RPS10	1	0	0	0	0
P46926	GNPDA1	1	0	0	0	0
P47813	EIF1AX	1	0	0	0	0
O14602	EIF1AY	1	0	0	0	0
P47914	RPL29	1	0	0	0	0
P48643	CCT5	1	0	0	0	0
P48729	CSNK1A1	1	0	0	0	0
Q8N752	CSNK1A1L	1	0	0	0	0
P49005	POLD2	1	0	0	0	0
P49189	ALDH9A1	1	0	0	0	0
P49207	RPL34	1	0	0	0	0
P49257	LMAN1	1	0	0	0	0
P49354	FNTA	1	0	0	0	0
P49368	CCT3	1	0	0	0	0
P49406	MRPL19	1	0	0	0	0
P49419	ALDH7A1	1	0	0	0	0
P49591	SARS1	1	0	0	0	0
P49643	PRIM2	1	0	0	0	0
P49720	PSMB3	1	0	0	0	0
P49721	PSMB2	1	0	0	0	0
P49841	GSK3B	1	0	0	0	0
P49914	MTHFS	1	0	0	0	0
P50402	EMD	1	0	0	0	0
P50454	SERPINH1	1	0	0	0	0
P50502	ST13	1	0	0	0	0
Q8NFI4	ST13P5	1	0	0	0	0
P50552	VASP	1	0	0	0	0
P50750	CDK9	1	0	0	0	0
P50897	PPT1	1	0	0	0	0
P50914	RPL14	1	0	0	0	0
P50990	CCT8	1	0	0	0	0
P50995	ANXA11	1	0	0	0	0
P51452	DUSP3	1	0	0	0	0
P51570	GALK1	1	0	0	0	0
P51571	SSR4	1	0	0	0	0
P51572	BCAP31	1	0	0	0	0
P51648	ALDH3A2	1	0	0	0	0
P51649	ALDH5A1	1	0	0	0	0
P51665	PSMD7	1	0	0	0	0
P52292	KPNA2	1	0	0	0	0
P52565	ARHGDIA	1	0	0	0	0
P52788	SMS	1	0	0	0	0
P52815	MRPL12	1	0	0	0	0
P53004	BLVRA	1	0	0	0	0
P53041	PPP5C	1	0	0	0	0
P53701	HCCS	1	0	0	0	0
P53990	IST1	1	0	0	0	0
P54577	YARS1	1	0	0	0	0
P54709	ATP1B3	1	0	0	0	0
P54819	AK2	1	0	0	0	0
P55263	ADK	1	0	0	0	0
P55735	SEC13	1	0	0	0	0
P55809	OXCT1	1	0	0	0	0
Q9BYC2	OXCT2	1	0	0	0	0
P56182	RRP1	1	0	0	0	0
P56537	EIF6	1	0	0	0	0
P57721	PCBP3	1	0	0	0	0
P60228	EIF3E	1	0	0	0	0
P60510	PPP4C	1	0	0	0	0
P60709	ACTB	1	0	0	0	0
P60842	EIF4A1	1	0	0	0	0
P60866	RPS20	1	0	0	0	0
P60900	PSMA6	1	0	0	0	0
P61009	SPCS3	1	0	0	0	0
P61158	ACTR3	1	0	0	0	0
Q9P1U1	ACTR3B	1	0	0	0	0
P61160	ACTR2	1	0	0	0	0
P61163	ACTR1A	1	0	0	0	0
P61254	RPL26	1	0	0	0	0
P61313	RPL15	1	0	0	0	0
P61353	RPL27	1	0	0	0	0
P61421	ATP6V0D1	1	0	0	0	0
P61619	SEC61A1	1	0	0	0	0
Q9H9S3	SEC61A2	1	0	0	0	0
P61923	COPZ1	1	0	0	0	0
P61964	WDR5	1	0	0	0	0
P61978	HNRNPK	1	0	0	0	0
P61981	YWHAG	1	0	0	0	0
P62081	RPS7	1	0	0	0	0
P62195	PSMC5	1	0	0	0	0
P62241	RPS8	1	0	0	0	0
P62258	YWHAE	1	0	0	0	0
P62263	RPS14	1	0	0	0	0
P62266	RPS23	1	0	0	0	0
P62269	RPS18	1	0	0	0	0
P62277	RPS13	1	0	0	0	0
P62330	ARF6	1	0	0	0	0
P62424	RPL7A	1	0	0	0	0
P62487	POLR2G	1	0	0	0	0
P62701	RPS4X	1	0	0	0	0
Q8TD47	RPS4Y2	1	0	0	0	0
P22090	RPS4Y1	1	0	0	0	0
P62750	RPL23A	1	0	0	0	0
P62820	RAB1A	1	0	0	0	0
P62851	RPS25	1	0	0	0	0
P62854	RPS26	1	0	0	0	0
Q5JNZ5	RPS26P11	1	0	0	0	0
P62873	GNB1	1	0	0	0	0
P16520	GNB3	1	0	0	0	0
P62879	GNB2	1	0	0	0	0
P62906	RPL10A	1	0	0	0	0
P62910	RPL32	1	0	0	0	0
P62993	GRB2	1	0	0	0	0
P62995	TRA2B	1	0	0	0	0
P63092	GNAS	1	0	0	0	0
P63104	YWHAZ	1	0	0	0	0
P63261	ACTG1	1	0	0	0	0
P67870	CSNK2B	1	0	0	0	0
P68032	ACTC1	1	0	0	0	0
P68133	ACTA1	1	0	0	0	0
P63267	ACTG2	1	0	0	0	0
P62736	ACTA2	1	0	0	0	0
P68400	CSNK2A1	1	0	0	0	0
Q8NEV1	CSNK2A3	1	0	0	0	0
P68402	PAFAH1B2	1	0	0	0	0
Q16695	H3-4	1	0	0	0	0
P68431	H3C1	1	0	0	0	0
Q6NXT2	H3-5	1	0	0	0	0
P78318	IGBP1	1	0	0	0	0
P78371	CCT2	1	0	0	0	0
P78417	GSTO1	1	0	0	0	0
P82650	MRPS22	1	0	0	0	0
P82663	MRPS25	1	0	0	0	0
P82930	MRPS34	1	0	0	0	0
P82933	MRPS9	1	0	0	0	0
P82979	SARNP	1	0	0	0	0
P84085	ARF5	1	0	0	0	0
P84098	RPL19	1	0	0	0	0
P84103	SRSF3	1	0	0	0	0
Q00688	FKBP3	1	0	0	0	0
Q00765	REEP5	1	0	0	0	0
Q01085	TIAL1	1	0	0	0	0
Q01130	SRSF2	1	0	0	0	0
Q9BRL6	SRSF8	1	0	0	0	0
Q01518	CAP1	1	0	0	0	0
P40123	CAP2	1	0	0	0	0
Q02127	DHODH	1	0	0	0	0
Q02750	MAP2K1	1	0	0	0	0
Q02790	FKBP4	1	0	0	0	0
Q02978	SLC25A11	1	0	0	0	0
Q03154	ACY1	1	0	0	0	0
Q04917	YWHAH	1	0	0	0	0
Q05048	CSTF1	1	0	0	0	0
Q05639	EEF1A2	1	0	0	0	0
Q06203	PPAT	1	0	0	0	0
Q06830	PRDX1	1	0	0	0	0
Q07021	C1QBP	1	0	0	0	0
Q07955	SRSF1	1	0	0	0	0
Q08209	PPP3CA	1	0	0	0	0
P16298	PPP3CB	1	0	0	0	0
P48454	PPP3CC	1	0	0	0	0
Q08257	CRYZ	1	0	0	0	0
Q10713	PMPCA	1	0	0	0	0
Q12792	TWF1	1	0	0	0	0
Q12824	SMARCB1	1	0	0	0	0
Q12846	STX4	1	0	0	0	0
Q12874	SF3A3	1	0	0	0	0
Q12904	AIMP1	1	0	0	0	0
Q12905	ILF2	1	0	0	0	0
Q13084	MRPL28	1	0	0	0	0
Q13098	GPS1	1	0	0	0	0
Q13126	MTAP	1	0	0	0	0
Q13151	HNRNPA0	1	0	0	0	0
Q13162	PRDX4	1	0	0	0	0
Q13177	PAK2	1	0	0	0	0
Q13347	EIF3I	1	0	0	0	0
Q13363	CTBP1	1	0	0	0	0
P56545	CTBP2	1	0	0	0	0
Q13442	PDAP1	1	0	0	0	0
Q13547	HDAC1	1	0	0	0	0
Q13564	NAE1	1	0	0	0	0
Q13572	ITPK1	1	0	0	0	0
Q13595	TRA2A	1	0	0	0	0
Q13838	DDX39B	1	0	0	0	0
Q13867	BLMH	1	0	0	0	0
Q13885	TUBB2A	1	0	0	0	0
Q9BVA1	TUBB2B	1	0	0	0	0
Q13895	BYSL	1	0	0	0	0
Q13907	IDI1	1	0	0	0	0
Q14011	CIRBP	1	0	0	0	0
Q14197	MRPL58	1	0	0	0	0
Q14232	EIF2B1	1	0	0	0	0
Q14320	FAM50A	1	0	0	0	0
Q9Y247	FAM50B	1	0	0	0	0
Q14331	FRG1	1	0	0	0	0
Q14344	GNA13	1	0	0	0	0
Q14498	RBM39	1	0	0	0	0
Q14696	MESD	1	0	0	0	0
Q14847	LASP1	1	0	0	0	0
Q14914	PTGR1	1	0	0	0	0
Q15006	EMC2	1	0	0	0	0
Q15008	PSMD6	1	0	0	0	0
Q15019	SEPTIN2	1	0	0	0	0
Q15056	EIF4H	1	0	0	0	0
Q15070	OXA1L	1	0	0	0	0
Q15102	PAFAH1B3	1	0	0	0	0
Q15125	EBP	1	0	0	0	0
Q15181	PPA1	1	0	0	0	0
Q15257	PTPA	1	0	0	0	0
Q15293	RCN1	1	0	0	0	0
Q15363	TMED2	1	0	0	0	0
Q15392	DHCR24	1	0	0	0	0
Q15404	RSU1	1	0	0	0	0
Q15427	SF3B4	1	0	0	0	0
Q15435	PPP1R7	1	0	0	0	0
Q15631	TSN	1	0	0	0	0
Q15691	MAPRE1	1	0	0	0	0
Q15717	ELAVL1	1	0	0	0	0
Q12926	ELAVL2	1	0	0	0	0
Q15738	NSDHL	1	0	0	0	0
Q15904	ATP6AP1	1	0	0	0	0
Q15907	RAB11B	1	0	0	0	0
P62491	RAB11A	1	0	0	0	0
P57735	RAB25	1	0	0	0	0
Q16401	PSMD5	1	0	0	0	0
Q16543	CDC37	1	0	0	0	0
Q14195	DPYSL3	1	0	0	0	0
Q16629	SRSF7	1	0	0	0	0
Q16658	FSCN1	1	0	0	0	0
Q16698	DECR1	1	0	0	0	0
Q16719	KYNU	1	0	0	0	0
Q16762	TST	1	0	0	0	0
Q16850	CYP51A1	1	0	0	0	0
Q16851	UGP2	1	0	0	0	0
Q2TAY7	SMU1	1	0	0	0	0
Q30201	HFE	1	0	0	0	0
Q3LXA3	TKFC	1	0	0	0	0
Q4G0N4	NADK2	1	0	0	0	0
Q53EL6	PDCD4	1	0	0	0	0
Q53H82	LACTB2	1	0	0	0	0
Q53H96	PYCR3	1	0	0	0	0
Q58FF8	HSP90AB2P	1	0	0	0	0
Q5RKV6	EXOSC6	1	0	0	0	0
Q5T6V5	C9orf64	1	0	0	0	0
Q969Z3	MTARC2	1	0	0	0	0
Q68CQ7	GLT8D1	1	0	0	0	0
Q6DD88	ATL3	1	0	0	0	0
Q6FI81	CIAPIN1	1	0	0	0	0
Q6IQ22	RAB12	1	0	0	0	0
Q6NZI2	CAVIN1	1	0	0	0	0
Q6P587	FAHD1	1	0	0	0	0
Q6UXN9	WDR82	1	0	0	0	0
Q6XQN6	NAPRT	1	0	0	0	0
Q70UQ0	IKBIP	1	0	0	0	0
Q70Z53	FRA10AC1	1	0	0	0	0
Q7L0Y3	TRMT10C	1	0	0	0	0
Q7L1Q6	BZW1	1	0	0	0	0
Q9H8S9	MOB1A	1	0	0	0	0
Q7L9L4	MOB1B	1	0	0	0	0
Q7Z4W1	DCXR	1	0	0	0	0
Q7Z7H8	MRPL10	1	0	0	0	0
Q86TX2	ACOT1	1	0	0	0	0
Q86U90	YRDC	1	0	0	0	0
Q86W42	THOC6	1	0	0	0	0
Q8IUR0	TRAPPC5	1	0	0	0	0
Q8IWS0	PHF6	1	0	0	0	0
Q8N183	NDUFAF2	1	0	0	0	0
Q8N9N2	ASCC1	1	0	0	0	0
Q8NB16	MLKL	1	0	0	0	0
Q8NBU5	ATAD1	1	0	0	0	0
Q8NEJ9	NGDN	1	0	0	0	0
Q8NFH5	NUP35	1	0	0	0	0
Q8TBC4	UBA3	1	0	0	0	0
Q8TDP1	RNASEH2C	1	0	0	0	0
Q8WVX9	FAR1	1	0	0	0	0
Q8WW12	PCNP	1	0	0	0	0
Q8WW59	SPRYD4	1	0	0	0	0
Q8WWY3	PRPF31	1	0	0	0	0
Q8WXF1	PSPC1	1	0	0	0	0
Q92522	H1-10	1	0	0	0	0
Q92688	ANP32B	1	0	0	0	0
Q92747	ARPC1A	1	0	0	0	0
Q92879	CELF1	1	0	0	0	0
O95319	CELF2	1	0	0	0	0
Q92917	GPKOW	1	0	0	0	0
Q92947	GCDH	1	0	0	0	0
Q92979	EMG1	1	0	0	0	0
Q969U7	PSMG2	1	0	0	0	0
Q96A35	MRPL24	1	0	0	0	0
Q96AG4	LRRC59	1	0	0	0	0
Q96C19	EFHD2	1	0	0	0	0
Q9BUP0	EFHD1	1	0	0	0	0
Q96C36	PYCR2	1	0	0	0	0
Q96C86	DCPS	1	0	0	0	0
Q96CS3	FAF2	1	0	0	0	0
Q96CW1	AP2M1	1	0	0	0	0
Q96D46	NMD3	1	0	0	0	0
Q96DI7	SNRNP40	1	0	0	0	0
Q96EK6	GNPNAT1	1	0	0	0	0
Q96EP5	DAZAP1	1	0	0	0	0
Q96ER9	CCDC51	1	0	0	0	0
Q96FW1	OTUB1	1	0	0	0	0
Q96G21	IMP4	1	0	0	0	0
Q96GM5	SMARCD1	1	0	0	0	0
Q96HY6	DDRGK1	1	0	0	0	0
Q96IJ6	GMPPA	1	0	0	0	0
Q96IU4	ABHD14B	1	0	0	0	0
Q96JJ7	TMX3	1	0	0	0	0
Q96K17	BTF3L4	1	0	0	0	0
Q96PU8	QKI	1	0	0	0	0
Q99426	TBCB	1	0	0	0	0
Q99436	PSMB7	1	0	0	0	0
Q99536	VAT1	1	0	0	0	0
Q99598	TSNAX	1	0	0	0	0
Q99627	COPS8	1	0	0	0	0
Q99653	CHP1	1	0	0	0	0
Q99720	SIGMAR1	1	0	0	0	0
Q99816	TSG101	1	0	0	0	0
Q99829	CPNE1	1	0	0	0	0
Q99832	CCT7	1	0	0	0	0
Q99848	EBNA1BP2	1	0	0	0	0
Q9BPX5	ARPC5L	1	0	0	0	0
Q9BQ15	NABP2	1	0	0	0	0
Q96AH0	NABP1	1	0	0	0	0
Q9BQA1	WDR77	1	0	0	0	0
Q9BRQ8	AIFM2	1	0	0	0	0
Q9BRX8	PRXL2A	1	0	0	0	0
Q9BS26	ERP44	1	0	0	0	0
Q9BSD7	NTPCR	1	0	0	0	0
Q9BSH4	TACO1	1	0	0	0	0
Q9BSV6	TSEN34	1	0	0	0	0
Q9BTT0	ANP32E	1	0	0	0	0
Q9BTV4	TMEM43	1	0	0	0	0
P0CG22	DHRS4L1	1	0	0	0	0
Q9BUP3	HTATIP2	1	0	0	0	0
Q9BV38	WDR18	1	0	0	0	0
Q9BV86	NTMT1	1	0	0	0	0
Q9BVK6	TMED9	1	0	0	0	0
Q9BWF3	RBM4	1	0	0	0	0
Q9BQ04	RBM4B	1	0	0	0	0
Q9BXS5	AP1M1	1	0	0	0	0
Q9Y6Q5	AP1M2	1	0	0	0	0
Q9BY32	ITPA	1	0	0	0	0
Q9BY43	CHMP4A	1	0	0	0	0
Q9BYD1	MRPL13	1	0	0	0	0
Q9BYD3	MRPL4	1	0	0	0	0
Q9BYN8	MRPS26	1	0	0	0	0
Q9BZG1	RAB34	1	0	0	0	0
Q9BZK7	TBL1XR1	1	0	0	0	0
Q9BQ87	TBL1Y	1	0	0	0	0
Q9GZS3	WDR61	1	0	0	0	0
Q9GZZ1	NAA50	1	0	0	0	0
Q9H0C8	ILKAP	1	0	0	0	0
Q9H0S4	DDX47	1	0	0	0	0
Q9H0U4	RAB1B	1	0	0	0	0
Q92928	RAB1C	1	0	0	0	0
P59190	RAB15	1	0	0	0	0
Q9H0U6	MRPL18	1	0	0	0	0
Q9H0V9	LMAN2L	1	0	0	0	0
Q9H2J4	PDCL3	1	0	0	0	0
Q9H2P9	DPH5	1	0	0	0	0
Q9H2W6	MRPL46	1	0	0	0	0
Q9H488	POFUT1	1	0	0	0	0
Q9H5Q4	TFB2M	1	0	0	0	0
Q9H7B2	RPF2	1	0	0	0	0
Q9H7L9	SUDS3	1	0	0	0	0
Q9H871	RMND5A	1	0	0	0	0
Q96G75	RMND5B	1	0	0	0	0
Q9H944	MED20	1	0	0	0	0
Q9HAV7	GRPEL1	1	0	0	0	0
Q9HBH0	RHOF	1	0	0	0	0
Q9HC16	APOBEC3G	1	0	0	0	0
Q9HC38	GLOD4	1	0	0	0	0
Q9HDC9	APMAP	1	0	0	0	0
Q9NP81	SARS2	1	0	0	0	0
Q9NPD8	UBE2T	1	0	0	0	0
Q9NPF4	OSGEP	1	0	0	0	0
Q9NVN3	RIC8B	1	0	0	0	0
Q9NPQ8	RIC8A	1	0	0	0	0
Q9NQ50	MRPL40	1	0	0	0	0
Q9NQ88	TIGAR	1	0	0	0	0
Q9NQG5	RPRD1B	1	0	0	0	0
Q9NQH7	XPNPEP3	1	0	0	0	0
Q9NQR4	NIT2	1	0	0	0	0
Q9NR28	DIABLO	1	0	0	0	0
Q9NR31	SAR1A	1	0	0	0	0
Q9NR56	MBNL1	1	0	0	0	0
Q9NRG7	SDR39U1	1	0	0	0	0
Q9NSC5	HOMER3	1	0	0	0	0
Q9NT62	ATG3	1	0	0	0	0
Q9NTK5	OLA1	1	0	0	0	0
Q9NTX5	ECHDC1	1	0	0	0	0
Q9NVD7	PARVA	1	0	0	0	0
Q9HBI1	PARVB	1	0	0	0	0
Q9NVZ3	NECAP2	1	0	0	0	0
Q9NWT1	PAK1IP1	1	0	0	0	0
Q9NWU5	MRPL22	1	0	0	0	0
Q9NX20	MRPL16	1	0	0	0	0
Q9NX24	NHP2	1	0	0	0	0
Q9NX58	LYAR	1	0	0	0	0
Q9NX62	BPNT2	1	0	0	0	0
Q9NXR7	BABAM2	1	0	0	0	0
Q9NXW2	DNAJB12	1	0	0	0	0
Q9NYK5	MRPL39	1	0	0	0	0
Q9NZJ7	MTCH1	1	0	0	0	0
Q9NZL9	MAT2B	1	0	0	0	0
Q9NZM5	NOP53	1	0	0	0	0
Q9P000	COMMD9	1	0	0	0	0
Q9P013	CWC15	1	0	0	0	0
Q9P0I2	EMC3	1	0	0	0	0
Q9P0V9	SEPTIN10	1	0	0	0	0
Q9P0W2	HMG20B	1	0	0	0	0
Q9UBM7	DHCR7	1	0	0	0	0
Q9UBP6	METTL1	1	0	0	0	0
Q9UBQ0	VPS29	1	0	0	0	0
Q9UBQ5	EIF3K	1	0	0	0	0
Q9UBQ7	GRHPR	1	0	0	0	0
Q9UBR2	CTSZ	1	0	0	0	0
Q9UBS4	DNAJB11	1	0	0	0	0
Q9UBU8	MORF4L1	1	0	0	0	0
Q9UDY4	DNAJB4	1	0	0	0	0
Q9UGI8	TES	1	0	0	0	0
Q9UHD1	CHORDC1	1	0	0	0	0
Q9UHK6	AMACR	1	0	0	0	0
Q9UHX1	PUF60	1	0	0	0	0
Q9UI42	CPA4	1	0	0	0	0
Q9UIJ7	AK3	1	0	0	0	0
Q9UJA5	TRMT6	1	0	0	0	0
Q9UKK9	NUDT5	1	0	0	0	0
Q9UKL0	RCOR1	1	0	0	0	0
Q9P2K3	RCOR3	1	0	0	0	0
Q9UKX7	NUP50	1	0	0	0	0
Q9ULR0	ISY1	1	0	0	0	0
Q9ULV4	CORO1C	1	0	0	0	0
Q9UN86	G3BP2	1	0	0	0	0
Q9UNE7	STUB1	1	0	0	0	0
Q9UNF0	PACSIN2	1	0	0	0	0
Q9UNH7	SNX6	1	0	0	0	0
Q9UNQ2	DIMT1	1	0	0	0	0
Q9UNS2	COPS3	1	0	0	0	0
Q9UNZ2	NSFL1C	1	0	0	0	0
Q9UQ80	PA2G4	1	0	0	0	0
Q9Y281	CFL2	1	0	0	0	0
Q9Y282	ERGIC3	1	0	0	0	0
Q9Y295	DRG1	1	0	0	0	0
Q9Y296	TRAPPC4	1	0	0	0	0
Q9Y2C4	EXOG	1	0	0	0	0
Q9Y2P8	RCL1	1	0	0	0	0
Q9Y312	AAR2	1	0	0	0	0
Q9Y399	MRPS2	1	0	0	0	0
Q9Y3A5	SBDS	1	0	0	0	0
Q9Y3B3	TMED7	1	0	0	0	0
Q9Y3B7	MRPL11	1	0	0	0	0
Q9Y3D9	MRPS23	1	0	0	0	0
Q9Y3I0	RTCB	1	0	0	0	0
Q9Y3Y2	CHTOP	1	0	0	0	0
Q9Y4P3	TBL2	1	0	0	0	0
Q9Y547	HSPB11	1	0	0	0	0
Q9Y580	RBM7	1	0	0	0	0
Q9Y5B8	NME7	1	0	0	0	0
Q9Y5K8	ATP6V1D	1	0	0	0	0
Q9Y5Q8	GTF3C5	1	0	0	0	0
Q9Y5S9	RBM8A	1	0	0	0	0
Q9Y5X3	SNX5	1	0	0	0	0
Q9Y5Y5	PEX16	1	0	0	0	0
Q9Y606	PUS1	1	0	0	0	0
Q9Y617	PSAT1	1	0	0	0	0
Q9Y696	CLIC4	1	0	0	0	0
Q9Y6A4	CFAP20	1	0	0	0	0
Q9Y6E2	BZW2	1	0	0	0	0
Q9Y6M9	NDUFB9	1	0	0	0	0
Q9Y6N5	SQOR	1	0	0	0	0

## Sheet: 2
Uniprot #	Gene name	Unmodified	Monomodified	Dimodified	Trimodified	Tetramodified
Q8NHM4	PRSS3P2	1	0	0	0	0
P07478	PRSS2	1	0	0	0	0
P07477	PRSS1	1	0	0	0	0
P02649	APOE	0.2668	0.7332	0	0	0
P08729	KRT7	0.188697	0.811303	0	0	0
A4D1E9	GTPBP10	1	0	0	0	0
A6NDG6	PGP	1	0	0	0	0
O00148	DDX39A	1	0	0	0	0
O00151	PDLIM1	1	0	0	0	0
O00154	ACOT7	0.575432	0.424568	0	0	0
O00165	HAX1	1	0	0	0	0
O00217	NDUFS8	1	0	0	0	0
O00231	PSMD11	0.335593	0.664407	0	0	0
O00232	PSMD12	0.63333	0.36667	0	0	0
O00264	PGRMC1	0.638031	0.361969	0	0	0
O00273	DFFA	0.179792	0.820208	0	0	0
O00299	CLIC1	1	0	0	0	0
O00442	RTCA	1	0	0	0	0
O00487	PSMD14	1	0	0	0	0
O00560	SDCBP	0.765975	0.234025	0	0	0
O00625	PIR	1	0	0	0	0
O00629	KPNA4	1	0	0	0	0
O00743	PPP6C	0.666988	0.333012	0	0	0
O00764	PDXK	0.805	0.195	0	0	0
O14579	COPE	1	0	0	0	0
O14657	TOR1B	1	0	0	0	0
O14684	PTGES	0.380232	0.619768	0	0	0
O14732	IMPA2	0.3873	0.243923	0.368777	0	0
O14818	PSMA7	1	0	0	0	0
Q8TAA3	PSMA8	1	0	0	0	0
O14828	SCAMP3	1	0	0	0	0
O14880	MGST3	1	0	0	0	0
O14908	GIPC1	1	0	0	0	0
O14925	TIMM23	0.393428	0.606572	0	0	0
O14929	HAT1	0.342695	0.657305	0	0	0
P19105	MYL12A	0.401841	0.598159	0	0	0
O14950	MYL12B	0.401841	0.598159	0	0	0
P24844	MYL9	0.401841	0.598159	0	0	0
O15145	ARPC3	0.200405	0.799595	0	0	0
O15160	POLR1C	1	0	0	0	0
O15173	PGRMC2	0.259588	0.473887	0.266525	0	0
O15269	SPTLC1	1	0	0	0	0
O15372	EIF3H	0.195339	0.804661	0	0	0
O15460	P4HA2	1	0	0	0	0
O15498	YKT6	1	0	0	0	0
O43169	CYB5B	1	0	0	0	0
O43172	PRPF4	1	0	0	0	0
O43175	PHGDH	1	0	0	0	0
O43324	EEF1E1	1	0	0	0	0
O43396	TXNL1	1	0	0	0	0
O43399	TPD52L2	1	0	0	0	0
O43488	AKR7A2	0.839546	0.160454	0	0	0
Q8NHP1	AKR7L	0.87321	0.12679	0	0	0
O43598	DNPH1	1	0	0	0	0
O43617	TRAPPC3	0.564868	0.435132	0	0	0
O43681	GET3	1	0	0	0	0
O43684	BUB3	0.526046	0.473954	0	0	0
O43709	BUD23	1	0	0	0	0
O43760	SYNGR2	0.669425	0.13722	0.193355	0	0
O43765	SGTA	1	0	0	0	0
O43809	NUDT21	1	0	0	0	0
O43837	IDH3B	1	0	0	0	0
O60256	PRPSAP2	1	0	0	0	0
O60547	GMDS	1	0	0	0	0
O60664	PLIN3	1	0	0	0	0
O60684	KPNA6	1	0	0	0	0
P52294	KPNA1	1	0	0	0	0
O15131	KPNA5	1	0	0	0	0
O60701	UGDH	1	0	0	0	0
O60762	DPM1	0.733746	0.266254	0	0	0
Q99880	H2BC13	0.626665	0.25093	0.122405	0	0
Q99879	H2BC14	0.626665	0.25093	0.122405	0	0
Q99877	H2BC15	0.626665	0.25093	0.122405	0	0
Q93079	H2BC9	0.626665	0.25093	0.122405	0	0
Q5QNW6	H2BC18	0.626665	0.25093	0.122405	0	0
Q16778	H2BC21	0.626665	0.25093	0.122405	0	0
P62807	H2BC10	0.626665	0.25093	0.122405	0	0
P58876	H2BC5	0.626665	0.25093	0.122405	0	0
P33778	H2BC3	0.626665	0.25093	0.122405	0	0
P23527	H2BC17	0.626665	0.25093	0.122405	0	0
P06899	H2BC11	0.48992	0.387676	0.122405	0	0
O60814	H2BC12	0.626665	0.25093	0.122405	0	0
P57053	H2BC12L	0.626665	0.25093	0.122405	0	0
Q8N257	H2BU1	0.626665	0.25093	0.122405	0	0
Q96A08	H2BC1	0.626665	0.25093	0.122405	0	0
Q6DRA6	H2BC19P	0.48992	0.387676	0.122405	0	0
Q6DN03	H2BC20P	0.48992	0.387676	0.122405	0	0
O60828	PQBP1	1	0	0	0	0
O60831	PRAF2	1	0	0	0	0
O60884	DNAJA2	1	0	0	0	0
O75131	CPNE3	1	0	0	0	0
Q96FN4	CPNE2	1	0	0	0	0
O95741	CPNE6	1	0	0	0	0
O75208	COQ9	1	0	0	0	0
O75223	GGCT	0.756606	0.243394	0	0	0
O75251	NDUFS7	0.5	0.5	0	0	0
O75340	PDCD6	0.650307	0.349693	0	0	0
O75367	MACROH2A1	1	0	0	0	0
Q9P0M6	MACROH2A2	1	0	0	0	0
O75396	SEC22B	1	0	0	0	0
O75436	VPS26A	1	0	0	0	0
O75489	NDUFS3	1	0	0	0	0
O75494	SRSF10	0.230533	0.769467	0	0	0
O75607	NPM3	0.600355	0.234619	0.165026	0	0
O75608	LYPLA1	1	0	0	0	0
O75718	CRTAP	1	0	0	0	0
O75792	RNASEH2A	1	0	0	0	0
O75794	CDC123	0.162669	0.262881	0.330305	0.244145	0
O75818	RPP40	1	0	0	0	0
O75822	EIF3J	0.140994	0.859006	0	0	0
O75828	CBR3	1	0	0	0	0
O75832	PSMD10	1	0	0	0	0
O75880	SCO1	1	0	0	0	0
O75934	BCAS2	0.646106	0.353894	0	0	0
O75935	DCTN3	0.8463	0.1537	0	0	0
O75937	DNAJC8	1	0	0	0	0
O75947	ATP5PD	0.634852	0.15702	0.208128	0	0
O75955	FLOT1	1	0	0	0	0
O76003	GLRX3	1	0	0	0	0
O76021	RSL1D1	1	0	0	0	0
O94903	PLPBP	1	0	0	0	0
O94905	ERLIN2	1	0	0	0	0
O95292	VAPB	1	0	0	0	0
O95299	NDUFA10	0.841307	0.158693	0	0	0
O95336	PGLS	0.609455	0.390545	0	0	0
O95372	LYPLA2	1	0	0	0	0
O95433	AHSA1	0.195723	0.804277	0	0	0
O95456	PSMG1	0.478605	0.273559	0.247836	0	0
O95571	ETHE1	0.742801	0.257199	0	0	0
O95747	OXSR1	1	0	0	0	0
O95749	GGPS1	1	0	0	0	0
O95816	BAG2	1	0	0	0	0
O95861	BPNT1	1	0	0	0	0
O95900	TRUB2	1	0	0	0	0
O96000	NDUFB10	1	0	0	0	0
O96007	MOCS2	1	0	0	0	0
O96008	TOMM40	1	0	0	0	0
O96019	ACTL6A	1	0	0	0	0
O94805	ACTL6B	1	0	0	0	0
P00338	LDHA	1	0	0	0	0
Q6ZMR3	LDHAL6A	1	0	0	0	0
P07864	LDHC	1	0	0	0	0
P00374	DHFR	1	0	0	0	0
Q86XF0	DHFR2	1	0	0	0	0
P00387	CYB5R3	1	0	0	0	0
P00403	MT-CO2	1	0	0	0	0
P00492	HPRT1	0.776795	0.223205	0	0	0
Q9NRG1	PRTFDC1	0.776795	0.223205	0	0	0
P00558	PGK1	1	0	0	0	0
P00568	AK1	0.366004	0.633996	0	0	0
P00966	ASS1	1	0	0	0	0
P01111	NRAS	0.304378	0.695622	0	0	0
P01116	KRAS	0.304378	0.695622	0	0	0
P01112	HRAS	0.304378	0.695622	0	0	0
P01891	HLA-A	1	0	0	0	0
P30459	HLA-A	1	0	0	0	0
P16189	HLA-A	1	0	0	0	0
P16190	HLA-A	1	0	0	0	0
P30512	HLA-A	1	0	0	0	0
P10314	HLA-A	1	0	0	0	0
P30511	HLA-F	1	0	0	0	0
Q5VX52	SPATA1	1	0	0	0	0
P02792	FTL	1	0	0	0	0
P02794	FTH1	1	0	0	0	0
P04040	CAT	0.601508	0.398492	0	0	0
P04062	GBA	1	0	0	0	0
P04075	ALDOA	0.644932	0.355068	0	0	0
P05062	ALDOB	0.644932	0.355068	0	0	0
P04083	ANXA1	0.644688	0.355312	0	0	0
P04179	SOD2	1	0	0	0	0
P04181	OAT	0.525171	0.474829	0	0	0
P04350	TUBB4A	0.237483	0.762517	0	0	0
P04406	GAPDH	0.39662	0.60338	0	0	0
P04632	CAPNS1	0.552713	0.447287	0	0	0
Q96L46	CAPNS2	0.72339	0.27661	0	0	0
P04792	HSPB1	1	0	0	0	0
P04818	TYMS	0.567647	0.432353	0	0	0
P04899	GNAI2	0.780347	0.219653	0	0	0
P11488	GNAT1	0.780347	0.219653	0	0	0
P09471	GNAO1	0.780347	0.219653	0	0	0
P19087	GNAT2	0.780347	0.219653	0	0	0
A8MTJ3	GNAT3	0.780347	0.219653	0	0	0
P38405	GNAL	0.709409	0.290591	0	0	0
P05026	ATP1B1	0.664683	0.335317	0	0	0
P05141	SLC25A5	0.270435	0.505634	0.223931	0	0
P05198	EIF2S1	0.210445	0.789555	0	0	0
P05388	RPLP0	1	0	0	0	0
Q8NHW5	RPLP0P6	1	0	0	0	0
P05455	SSB	1	0	0	0	0
P05534	HLA-A	1	0	0	0	0
P30447	HLA-A	1	0	0	0	0
P06132	UROD	0.296935	0.703065	0	0	0
P06493	CDK1	1	0	0	0	0
P06730	EIF4E	1	0	0	0	0
A6NMX2	EIF4E1B	1	0	0	0	0
P06733	ENO1	1	0	0	0	0
P13929	ENO3	1	0	0	0	0
P06748	NPM1	1	0	0	0	0
P06753	TPM3	1	0	0	0	0
P07195	LDHB	1	0	0	0	0
P07203	GPX1	0.779835	0.220165	0	0	0
P07237	P4HB	1	0	0	0	0
P07355	ANXA2	1	0	0	0	0
A6NMY6	ANXA2P2	1	0	0	0	0
P07437	TUBB	0.185873	0.614462	0.199665	0	0
A6NNZ2	TUBB8B	0.185873	0.614462	0.199665	0	0
Q9H4B7	TUBB1	0.800335	0.199665	0	0	0
P07711	CTSL	1	0	0	0	0
P07737	PFN1	1	0	0	0	0
P07741	APRT	0.184458	0.32436	0.491182	0	0
Q14568	HSP90AA2P	1	0	0	0	0
Q58FG0	HSP90AA5P	1	0	0	0	0
P07910	HNRNPC	1	0	0	0	0
O60812	HNRNPCL1	1	0	0	0	0
B2RXH8	HNRNPCL2	1	0	0	0	0
P0DMR1	HNRNPCL4	1	0	0	0	0
B7ZW38	HNRNPCL3	1	0	0	0	0
Q86SE5	RALYL	1	0	0	0	0
P07951	TPM2	1	0	0	0	0
P09493	TPM1	1	0	0	0	0
P08559	PDHA1	1	0	0	0	0
P29803	PDHA2	1	0	0	0	0
P08579	SNRPB2	1	0	0	0	0
P08670	VIM	0.344969	0.655031	0	0	0
P41219	PRPH	0.344969	0.655031	0	0	0
P14136	GFAP	0.439438	0.560562	0	0	0
Q16352	INA	1	0	0	0	0
P08708	RPS17	1	0	0	0	0
P08754	GNAI3	1	0	0	0	0
P08758	ANXA5	1	0	0	0	0
P08962	CD63	0.351984	0.262157	0.38586	0	0
P09001	MRPL3	1	0	0	0	0
P09012	SNRPA	1	0	0	0	0
P09211	GSTP1	0.463967	0.536033	0	0	0
P09382	LGALS1	1	0	0	0	0
P09417	QDPR	0.871015	0.128985	0	0	0
P09429	HMGB1	1	0	0	0	0
B2RPK0	HMGB1P1	1	0	0	0	0
P09488	GSTM1	1	0	0	0	0
Q03013	GSTM4	1	0	0	0	0
P09622	DLD	1	0	0	0	0
Q32P51	HNRNPA1L2	1	0	0	0	0
P09661	SNRPA1	1	0	0	0	0
P09972	ALDOC	1	0	0	0	0
Q9BTM1	H2AJ	0.561995	0.438005	0	0	0
Q6FI13	H2AC18	0.561995	0.438005	0	0	0
P20671	H2AC7	0.561995	0.438005	0	0	0
P0C0S8	H2AC11	0.561995	0.438005	0	0	0
Q93077	H2AC6	0.561995	0.438005	0	0	0
Q7L7L0	H2AW	0.561995	0.438005	0	0	0
P04908	H2AC4	0.561995	0.438005	0	0	0
Q96QV6	H2AC1	0.561995	0.438005	0	0	0
P16104	H2AX	1	0	0	0	0
P62987	UBA52	0.743488	0.256512	0	0	0
P62979	RPS27A	0.743488	0.256512	0	0	0
P0CG47	UBB	0.675645	0.324355	0	0	0
Q01081	U2AF1	0.358947	0.641053	0	0	0
P0DN76	#N/A	0.358947	0.641053	0	0	0
P10316	HLA-A	1	0	0	0	0
P01892	HLA-A	1	0	0	0	0
P10620	MGST1	0.849357	0.150643	0	0	0
P10644	PRKAR1A	0.553934	0.446066	0	0	0
P10768	ESD	1	0	0	0	0
P10809	HSPD1	1	0	0	0	0
P11172	UMPS	1	0	0	0	0
P11177	PDHB	0.338085	0.374126	0.287789	0	0
P11233	RALA	1	0	0	0	0
P11234	RALB	1	0	0	0	0
P11310	ACADM	1	0	0	0	0
P11413	G6PD	1	0	0	0	0
P11766	ADH5	1	0	0	0	0
P11802	CDK4	0.369554	0.630446	0	0	0
P11908	PRPS2	0.809667	0.190333	0	0	0
P12004	PCNA	0.492089	0.507911	0	0	0
P12236	SLC25A6	0.273748	0.468722	0.25753	0	0
P12268	IMPDH2	0.416171	0.583829	0	0	0
P12277	CKB	0.736463	0.263537	0	0	0
P06732	CKM	0.736463	0.263537	0	0	0
P12955	PEPD	1	0	0	0	0
P13489	RNH1	0.509135	0.490865	0	0	0
P13674	P4HA1	1	0	0	0	0
P13693	TPT1	0.558729	0.441271	0	0	0
Q9HAU6	TPT1P8	0.558729	0.441271	0	0	0
Q56UQ5	#N/A	0.558729	0.441271	0	0	0
P13804	ETFA	1	0	0	0	0
P13861	PRKAR2A	0.73506	0.26494	0	0	0
P31323	PRKAR2B	0.73506	0.26494	0	0	0
P13995	MTHFD2	0.503831	0.496169	0	0	0
P14550	AKR1A1	0.53243	0.23053	0.23704	0	0
P14618	PKM	0.33236	0.66764	0	0	0
P30613	PKLR	1	0	0	0	0
P63162	SNRPN	1	0	0	0	0
P14678	SNRPB	1	0	0	0	0
P15121	AKR1B1	0.42387	0.347034	0.229096	0	0
C9JRZ8	AKR1B15	0.602354	0.397646	0	0	0
P15328	FOLR1	1	0	0	0	0
P15374	UCHL3	1	0	0	0	0
P15531	NME1	1	0	0	0	0
P15559	NQO1	1	0	0	0	0
P15880	RPS2	0.633562	0.366438	0	0	0
P15927	RPA2	1	0	0	0	0
P16083	NQO2	0.240657	0.759343	0	0	0
P16152	CBR1	0.264206	0.563436	0.172358	0	0
P18846	ATF1	0.255814	0.744186	0	0	0
P16220	CREB1	1	0	0	0	0
P16402	H1-3	1	0	0	0	0
P22492	H1-6	1	0	0	0	0
P17612	PRKACA	1	0	0	0	0
P22612	PRKACG	1	0	0	0	0
P17931	LGALS3	1	0	0	0	0
P17980	PSMC3	0.648615	0.351385	0	0	0
P17987	TCP1	1	0	0	0	0
P18031	PTPN1	1	0	0	0	0
P18085	ARF4	0.379606	0.620394	0	0	0
P18124	RPL7	1	0	0	0	0
P18621	RPL17	0.321058	0.52393	0.155012	0	0
P18669	PGAM1	1	0	0	0	0
Q8N0Y7	PGAM4	1	0	0	0	0
P15259	PGAM2	1	0	0	0	0
P18754	RCC1	1	0	0	0	0
P19387	POLR2C	1	0	0	0	0
P19388	POLR2E	1	0	0	0	0
P19404	NDUFV2	1	0	0	0	0
P19623	SRM	0.500914	0.499086	0	0	0
P19784	CSNK2A2	1	0	0	0	0
P19971	TYMP	1	0	0	0	0
P20290	BTF3	1	0	0	0	0
P20339	RAB5A	1	0	0	0	0
P20340	RAB6A	1	0	0	0	0
Q9NRW1	RAB6B	1	0	0	0	0
P20618	PSMB1	1	0	0	0	0
P21266	GSTM3	1	0	0	0	0
P21283	ATP6V1C1	1	0	0	0	0
P21291	CSRP1	1	0	0	0	0
P21796	VDAC1	1	0	0	0	0
P21912	SDHB	1	0	0	0	0
P21926	CD9	1	0	0	0	0
P21964	COMT	1	0	0	0	0
P22061	PCMT1	0.150793	0.67943	0.169777	0	0
P22087	FBL	0.833503	0.166497	0	0	0
P22234	PAICS	0.738695	0.261305	0	0	0
P22392	NME2	1	0	0	0	0
O60361	NME2P1	1	0	0	0	0
P22626	HNRNPA2B1	1	0	0	0	0
P22694	PRKACB	1	0	0	0	0
P22695	UQCRC2	1	0	0	0	0
P23193	TCEA1	0.250253	0.749747	0	0	0
P23284	PPIB	1	0	0	0	0
P23381	WARS1	1	0	0	0	0
P23396	RPS3	0.52103	0.47897	0	0	0
P23528	CFL1	1	0	0	0	0
P23919	DTYMK	1	0	0	0	0
P24534	EEF1B2	1	0	0	0	0
P24752	ACAT1	1	0	0	0	0
P25398	RPS12	0.228348	0.771652	0	0	0
P25685	DNAJB1	0.171175	0.828825	0	0	0
P25786	PSMA1	1	0	0	0	0
P25787	PSMA2	1	0	0	0	0
P25788	PSMA3	1	0	0	0	0
P25789	PSMA4	1	0	0	0	0
P26196	DDX6	1	0	0	0	0
P26368	U2AF2	1	0	0	0	0
P26373	RPL13	0.652338	0.347662	0	0	0
P26583	HMGB2	1	0	0	0	0
P26641	EEF1G	0.456213	0.543787	0	0	0
P27105	STOM	1	0	0	0	0
P27348	YWHAQ	1	0	0	0	0
P27635	RPL10	0.456046	0.284496	0.259458	0	0
Q96L21	RPL10L	0.456046	0.284496	0.259458	0	0
P27695	APEX1	1	0	0	0	0
P27797	CALR	1	0	0	0	0
P28065	PSMB9	1	0	0	0	0
P28066	PSMA5	0.193593	0.806407	0	0	0
P28072	PSMB6	1	0	0	0	0
P28482	MAPK1	1	0	0	0	0
P29692	EEF1D	1	0	0	0	0
P30040	ERP29	1	0	0	0	0
P30041	PRDX6	1	0	0	0	0
P30043	BLVRB	0.36104	0.63896	0	0	0
P30044	PRDX5	1	0	0	0	0
P30050	RPL12	1	0	0	0	0
P30084	ECHS1	1	0	0	0	0
P30085	CMPK1	1	0	0	0	0
P30086	PEBP1	0.287751	0.712249	0	0	0
P30405	PPIF	1	0	0	0	0
P30419	NMT1	1	0	0	0	0
O60551	NMT2	1	0	0	0	0
P30453	HLA-A	1	0	0	0	0
P30457	HLA-A	1	0	0	0	0
P30450	HLA-A	1	0	0	0	0
P18462	HLA-A	1	0	0	0	0
P30456	HLA-A	1	0	0	0	0
Q29940	HLA-B	1	0	0	0	0
P30493	HLA-B	1	0	0	0	0
P30492	HLA-B	1	0	0	0	0
P30508	HLA-C	1	0	0	0	0
P30510	HLA-C	1	0	0	0	0
Q07000	HLA-C	1	0	0	0	0
P30504	HLA-C	1	0	0	0	0
Q29960	HLA-C	1	0	0	0	0
P30505	HLA-C	1	0	0	0	0
Q9TNN7	HLA-C	1	0	0	0	0
P30501	HLA-C	1	0	0	0	0
Q95604	HLA-C	1	0	0	0	0
P30519	HMOX2	0.77704	0.22296	0	0	0
P30520	ADSS2	1	0	0	0	0
P30533	LRPAP1	1	0	0	0	0
P30536	TSPO	0.598254	0.401746	0	0	0
P30566	ADSL	1	0	0	0	0
P30626	SRI	1	0	0	0	0
P30740	SERPINB1	0.708909	0.291091	0	0	0
P50453	SERPINB9	0.708909	0.291091	0	0	0
O75830	SERPINI2	1	0	0	0	0
P31153	MAT2A	1	0	0	0	0
Q00266	MAT1A	1	0	0	0	0
P31350	RRM2	1	0	0	0	0
P31689	DNAJA1	0.804494	0.195506	0	0	0
P31930	UQCRC1	1	0	0	0	0
P31942	HNRNPH3	1	0	0	0	0
P31943	HNRNPH1	0.316744	0.365869	0.317386	0	0
P31946	YWHAB	1	0	0	0	0
P31947	SFN	0.269813	0.730187	0	0	0
P32119	PRDX2	1	0	0	0	0
P32322	PYCR1	1	0	0	0	0
P32969	RPL9	0.852619	0.147381	0	0	0
P34896	SHMT1	1	0	0	0	0
P34897	SHMT2	1	0	0	0	0
P35232	PHB1	1	0	0	0	0
P35237	SERPINB6	1	0	0	0	0
P35249	RFC4	1	0	0	0	0
P35250	RFC2	0.395069	0.604931	0	0	0
P35268	RPL22	0.749126	0.250874	0	0	0
P35270	SPR	0.601182	0.398818	0	0	0
P35613	BSG	1	0	0	0	0
P35659	DEK	0.13257	0.86743	0	0	0
P35998	PSMC2	1	0	0	0	0
P36404	ARL2	1	0	0	0	0
P36405	ARL3	0.2996	0.7004	0	0	0
P36507	MAP2K2	0.489134	0.510866	0	0	0
P36542	ATP5F1C	1	0	0	0	0
P36543	ATP6V1E1	0.265178	0.734822	0	0	0
P36578	RPL4	1	0	0	0	0
P36871	PGM1	1	0	0	0	0
P36873	PPP1CC	1	0	0	0	0
P36952	SERPINB5	1	0	0	0	0
P36957	DLST	1	0	0	0	0
P37235	HPCAL1	1	0	0	0	0
P84074	HPCA	1	0	0	0	0
P61601	NCALD	1	0	0	0	0
P37268	FDFT1	1	0	0	0	0
P37802	TAGLN2	0.565229	0.434771	0	0	0
Q9UI15	TAGLN3	0.565229	0.434771	0	0	0
P37837	TALDO1	1	0	0	0	0
P38117	ETFB	1	0	0	0	0
P38159	RBMX	1	0	0	0	0
Q96E39	RBMXL1	1	0	0	0	0
O75526	RBMXL2	1	0	0	0	0
P38919	EIF4A3	1	0	0	0	0
P39023	RPL3	0.475051	0.524949	0	0	0
Q92901	RPL3L	0.475051	0.524949	0	0	0
P39687	ANP32A	0.509936	0.490064	0	0	0
O43423	ANP32C	0.509936	0.490064	0	0	0
P39748	FEN1	0.410786	0.589214	0	0	0
P40121	CAPG	0.153389	0.696809	0.149802	0	0
P40227	CCT6A	1	0	0	0	0
Q92526	CCT6B	1	0	0	0	0
P40261	NNMT	0.833868	0.166132	0	0	0
P40429	RPL13A	1	0	0	0	0
P40616	ARL1	0.427783	0.572217	0	0	0
P40925	MDH1	1	0	0	0	0
P40926	MDH2	1	0	0	0	0
P40937	RFC5	1	0	0	0	0
P40938	RFC3	1	0	0	0	0
P41091	EIF2S3	1	0	0	0	0
Q2VIR3	EIF2S3B	1	0	0	0	0
P41227	NAA10	1	0	0	0	0
Q9BSU3	NAA11	1	0	0	0	0
P41240	CSK	0.867604	0.132396	0	0	0
P41247	PNPLA4	1	0	0	0	0
P42330	AKR1C3	0.776908	0.223092	0	0	0
Q04828	AKR1C1	0.776908	0.223092	0	0	0
P52895	AKR1C2	0.776908	0.223092	0	0	0
P17516	AKR1C4	0.776908	0.223092	0	0	0
P42765	ACAA2	0.412104	0.587896	0	0	0
P43034	PAFAH1B1	1	0	0	0	0
P43307	SSR1	1	0	0	0	0
P43487	RANBP1	0.3834	0.3409	0.2757	0	0
P43686	PSMC4	0.645136	0.354864	0	0	0
P45877	PPIC	0.797222	0.202778	0	0	0
P45880	VDAC2	0.18157	0.4017	0.41673	0	0
P45954	ACADSB	1	0	0	0	0
P46108	CRK	0.760009	0.239991	0	0	0
P46109	CRKL	0.619737	0.380263	0	0	0
P46776	RPL27A	0.549682	0.322363	0.127954	0	0
P46777	RPL5	1	0	0	0	0
P46778	RPL21	0.661578	0.338422	0	0	0
P46779	RPL28	1	0	0	0	0
P46781	RPS9	0.712639	0.287361	0	0	0
P46782	RPS5	0.577865	0.302804	0.119331	0	0
P46783	RPS10	1	0	0	0	0
Q9NQ39	RPS10P5	1	0	0	0	0
P46926	GNPDA1	1	0	0	0	0
Q8TDQ7	GNPDA2	1	0	0	0	0
P47755	CAPZA2	0.219846	0.780154	0	0	0
P47756	CAPZB	0.406698	0.593302	0	0	0
P47813	EIF1AX	1	0	0	0	0
O14602	EIF1AY	1	0	0	0	0
P47914	RPL29	0.523539	0.476461	0	0	0
P48047	ATP5PO	0.401768	0.598232	0	0	0
P48444	ARCN1	1	0	0	0	0
P48643	CCT5	1	0	0	0	0
P48739	PITPNB	1	0	0	0	0
P49189	ALDH9A1	1	0	0	0	0
P49354	FNTA	1	0	0	0	0
P49366	DHPS	1	0	0	0	0
P49368	CCT3	1	0	0	0	0
P49406	MRPL19	1	0	0	0	0
P49411	TUFM	0.556962	0.443038	0	0	0
P49591	SARS1	1	0	0	0	0
P49642	PRIM1	1	0	0	0	0
P49643	PRIM2	1	0	0	0	0
P49720	PSMB3	1	0	0	0	0
P49721	PSMB2	0.15651	0.84349	0	0	0
P49755	TMED10	1	0	0	0	0
P49770	EIF2B2	0.292742	0.707258	0	0	0
P50213	IDH3A	0.554463	0.445537	0	0	0
P50395	GDI2	1	0	0	0	0
P31150	GDI1	1	0	0	0	0
P50402	EMD	1	0	0	0	0
P50454	SERPINH1	1	0	0	0	0
P50502	ST13	1	0	0	0	0
Q8NFI4	ST13P5	0.417008	0.582992	0	0	0
P50579	METAP2	0.1992	0.8008	0	0	0
P50897	PPT1	1	0	0	0	0
P50914	RPL14	1	0	0	0	0
P50990	CCT8	1	0	0	0	0
P50991	CCT4	1	0	0	0	0
P51148	RAB5C	0.569082	0.199063	0.231855	0	0
P51149	RAB7A	0.415511	0.584489	0	0	0
P51151	RAB9A	0.428341	0.571659	0	0	0
Q9NP90	RAB9B	0.428341	0.571659	0	0	0
P51153	RAB13	1	0	0	0	0
P51398	DAP3	1	0	0	0	0
P51452	DUSP3	1	0	0	0	0
P51553	IDH3G	1	0	0	0	0
P51571	SSR4	0.557938	0.442062	0	0	0
P51572	BCAP31	1	0	0	0	0
P48448	ALDH3B2	1	0	0	0	0
P30838	ALDH3A1	1	0	0	0	0
P43353	ALDH3B1	1	0	0	0	0
P51665	PSMD7	1	0	0	0	0
P51991	HNRNPA3	0.760296	0.239704	0	0	0
P52209	PGD	1	0	0	0	0
P52292	KPNA2	1	0	0	0	0
P52565	ARHGDIA	1	0	0	0	0
P52597	HNRNPF	0.65524	0.34476	0	0	0
P52788	SMS	1	0	0	0	0
P52815	MRPL12	1	0	0	0	0
P52907	CAPZA1	0.25451	0.74549	0	0	0
P53004	BLVRA	0.790433	0.209567	0	0	0
P53007	SLC25A1	0.318649	0.2531	0.428251	0	0
P53367	ARFIP1	0.8091	0.1909	0	0	0
P53701	HCCS	1	0	0	0	0
P54577	YARS1	1	0	0	0	0
P54578	USP14	1	0	0	0	0
P54619	PRKAG1	0.160641	0.707914	0.131445	0	0
P54709	ATP1B3	0.530307	0.469693	0	0	0
P54819	AK2	1	0	0	0	0
P54920	NAPA	1	0	0	0	0
Q9H115	NAPB	1	0	0	0	0
P55010	EIF5	0.698727	0.301273	0	0	0
P55039	DRG2	0.17529	0.82471	0	0	0
P55084	HADHB	1	0	0	0	0
P55209	NAP1L1	1	0	0	0	0
P55263	ADK	0.815148	0.184852	0	0	0
P55327	TPD52	1	0	0	0	0
P55735	SEC13	1	0	0	0	0
P56537	EIF6	1	0	0	0	0
P56545	CTBP2	1	0	0	0	0
P56937	HSD17B7	1	0	0	0	0
P57088	TMEM33	0.54548	0.45452	0	0	0
P59780	AP3S2	1	0	0	0	0
P59998	ARPC4	0.176501	0.823499	0	0	0
P60228	EIF3E	1	0	0	0	0
P60510	PPP4C	1	0	0	0	0
P60709	ACTB	0.229698	0.471347	0.298955	0	0
Q9BYX7	POTEKP	0.229698	0.471347	0.298955	0	0
P60842	EIF4A1	1	0	0	0	0
Q14240	EIF4A2	0.558202	0.441798	0	0	0
P60866	RPS20	0.201099	0.523253	0.275648	0	0
P60891	PRPS1	1	0	0	0	0
P60900	PSMA6	1	0	0	0	0
P60953	CDC42	0.341238	0.658762	0	0	0
P17081	RHOQ	0.256285	0.743715	0	0	0
Q9H4E5	RHOJ	0.256285	0.743715	0	0	0
P60981	DSTN	0.777658	0.222342	0	0	0
P61006	RAB8A	0.133296	0.490286	0.376418	0	0
Q92930	RAB8B	0.133296	0.490286	0.376418	0	0
P61009	SPCS3	0.270818	0.729182	0	0	0
P61019	RAB2A	0.553855	0.446145	0	0	0
Q8WUD1	RAB2B	0.29733	0.70267	0	0	0
P61026	RAB10	0.708043	0.291957	0	0	0
P59190	RAB15	0.466684	0.533316	0	0	0
P61081	UBE2M	0.31789	0.68211	0	0	0
P61086	UBE2K	1	0	0	0	0
P61088	UBE2N	1	0	0	0	0
Q5JXB2	UBE2NL	1	0	0	0	0
P61106	RAB14	1	0	0	0	0
P61158	ACTR3	0.749508	0.250492	0	0	0
Q9P1U1	ACTR3B	0.749508	0.250492	0	0	0
P61160	ACTR2	1	0	0	0	0
P61163	ACTR1A	0.445319	0.554681	0	0	0
P61201	COPS2	1	0	0	0	0
P61224	RAP1B	0.276874	0.723126	0	0	0
P62834	RAP1A	0.276874	0.723126	0	0	0
A6NIZ1	#N/A	0.276874	0.723126	0	0	0
P61247	RPS3A	0.6726	0.3274	0	0	0
P61254	RPL26	1	0	0	0	0
P61289	PSME3	0.838977	0.161023	0	0	0
P61313	RPL15	1	0	0	0	0
P61353	RPL27	0.624805	0.196196	0.178999	0	0
P61421	ATP6V0D1	1	0	0	0	0
P61586	RHOA	0.671019	0.328981	0	0	0
P61758	VBP1	1	0	0	0	0
P61916	NPC2	1	0	0	0	0
P61923	COPZ1	0.463217	0.536783	0	0	0
P61964	WDR5	1	0	0	0	0
P61981	YWHAG	1	0	0	0	0
P62081	RPS7	1	0	0	0	0
P62136	PPP1CA	0.771979	0.228021	0	0	0
P62140	PPP1CB	0.51324	0.48676	0	0	0
P62191	PSMC1	0.662961	0.337039	0	0	0
P62195	PSMC5	0.224828	0.20751	0.259923	0.307739	0
P62241	RPS8	0.525197	0.474803	0	0	0
P62244	RPS15A	1	0	0	0	0
P62249	RPS16	0.720643	0.279357	0	0	0
P62256	UBE2H	1	0	0	0	0
P62258	YWHAE	1	0	0	0	0
P62263	RPS14	0.736044	0.263956	0	0	0
P62266	RPS23	1	0	0	0	0
P62269	RPS18	1	0	0	0	0
P62277	RPS13	1	0	0	0	0
P62280	RPS11	0.732899	0.267101	0	0	0
P62330	ARF6	1	0	0	0	0
P62333	PSMC6	0.512069	0.487931	0	0	0
P62424	RPL7A	1	0	0	0	0
P62495	ETF1	1	0	0	0	0
P62701	RPS4X	1	0	0	0	0
Q8TD47	RPS4Y2	1	0	0	0	0
P22090	RPS4Y1	1	0	0	0	0
P62750	RPL23A	1	0	0	0	0
P62753	RPS6	0.692409	0.307591	0	0	0
P62820	RAB1A	1	0	0	0	0
P62826	RAN	0.828908	0.171092	0	0	0
P62829	RPL23	1	0	0	0	0
P62851	RPS25	1	0	0	0	0
P62873	GNB1	0.43654	0.56346	0	0	0
P62879	GNB2	1	0	0	0	0
P62906	RPL10A	1	0	0	0	0
P62910	RPL32	1	0	0	0	0
P62913	RPL11	0.229541	0.770459	0	0	0
P62917	RPL8	0.711942	0.288058	0	0	0
P62937	PPIA	0.406112	0.593888	0	0	0
Q9Y536	PPIAL4A	0.406112	0.593888	0	0	0
P0DN26	PPIAL4F	0.406112	0.593888	0	0	0
F5H284	PPIAL4D	0.406112	0.593888	0	0	0
A0A0B4J2A2	PPIAL4C	0.406112	0.593888	0	0	0
A0A075B759	PPIAL4E	0.406112	0.593888	0	0	0
P0DN37	PPIAL4G	0.406112	0.593888	0	0	0
P62993	GRB2	1	0	0	0	0
P62995	TRA2B	0.851012	0.148988	0	0	0
P63000	RAC1	0.580857	0.419143	0	0	0
P60763	RAC3	0.477255	0.522745	0	0	0
P15153	RAC2	0.580857	0.419143	0	0	0
P63092	GNAS	0.726354	0.273646	0	0	0
P63104	YWHAZ	1	0	0	0	0
P63151	PPP2R2A	0.681319	0.318681	0	0	0
Q66LE6	PPP2R2D	1	0	0	0	0
Q9Y2T4	PPP2R2C	0.681319	0.318681	0	0	0
P63241	EIF5A	0.366352	0.633648	0	0	0
Q9GZV4	EIF5A2	0.366352	0.633648	0	0	0
Q6IS14	EIF5AL1	0.366352	0.633648	0	0	0
P63244	RACK1	1	0	0	0	0
P63261	ACTG1	0.785485	0.214515	0	0	0
P63279	UBE2I	0.158453	0.489394	0.352153	0	0
P67775	PPP2CA	1	0	0	0	0
P62714	PPP2CB	1	0	0	0	0
P67809	YBX1	0.263511	0.736489	0	0	0
Q9Y2T7	YBX2	0.263511	0.736489	0	0	0
P67870	CSNK2B	1	0	0	0	0
P67936	TPM4	1	0	0	0	0
P68032	ACTC1	0.67091	0.32909	0	0	0
P68133	ACTA1	0.67091	0.32909	0	0	0
P63267	ACTG2	0.67091	0.32909	0	0	0
P62736	ACTA2	0.67091	0.32909	0	0	0
P68036	UBE2L3	0.1233	0.5	0.3767	0	0
P68104	EEF1A1	0.303241	0.696759	0	0	0
Q5VTE0	EEF1A1P5	0.303241	0.696759	0	0	0
P68363	TUBA1B	0.342322	0.328001	0.329677	0	0
A6NHL2	TUBAL3	0.342322	0.328001	0.329677	0	0
P68366	TUBA4A	0.343965	0.219412	0.150949	0.285675	0
P68371	TUBB4B	0.704902	0.295098	0	0	0
P68400	CSNK2A1	1	0	0	0	0
Q8NEV1	CSNK2A3	1	0	0	0	0
P68402	PAFAH1B2	0.270091	0.461833	0.268077	0	0
Q71DI3	H3C13	0.814093	0.185907	0	0	0
Q16695	H3-4	0.705463	0.294537	0	0	0
P84243	H3-3A	0.814093	0.185907	0	0	0
P68431	H3C1	0.705463	0.294537	0	0	0
Q6NXT2	H3-5	0.705463	0.294537	0	0	0
P78330	PSPH	1	0	0	0	0
P78346	RPP30	0.687961	0.312039	0	0	0
P78406	RAE1	1	0	0	0	0
P78417	GSTO1	1	0	0	0	0
P82650	MRPS22	1	0	0	0	0
P82663	MRPS25	1	0	0	0	0
P82673	MRPS35	0.177963	0.822037	0	0	0
P82930	MRPS34	1	0	0	0	0
P82979	SARNP	1	0	0	0	0
P83731	RPL24	0.586669	0.413331	0	0	0
P83916	CBX1	1	0	0	0	0
P84077	ARF1	0.191575	0.808425	0	0	0
P84085	ARF5	0.393155	0.606845	0	0	0
P84098	RPL19	1	0	0	0	0
P84103	SRSF3	0.754397	0.245603	0	0	0
Q00325	SLC25A3	1	0	0	0	0
Q00577	PURA	0.530806	0.469194	0	0	0
Q00688	FKBP3	1	0	0	0	0
Q00765	REEP5	0.847615	0.152385	0	0	0
Q00796	SORD	0.611068	0.388932	0	0	0
Q01085	TIAL1	0.60977	0.39023	0	0	0
Q01105	SET	0.603466	0.396534	0	0	0
P0DME0	SETSIP	0.603466	0.396534	0	0	0
Q01130	SRSF2	1	0	0	0	0
Q9BRL6	SRSF8	1	0	0	0	0
Q01518	CAP1	1	0	0	0	0
Q01581	HMGCS1	1	0	0	0	0
Q02127	DHODH	0.258	0.742	0	0	0
Q02543	RPL18A	0.307308	0.692692	0	0	0
Q02790	FKBP4	1	0	0	0	0
Q02878	RPL6	1	0	0	0	0
Q02978	SLC25A11	1	0	0	0	0
Q04917	YWHAH	0.625982	0.374018	0	0	0
Q05048	CSTF1	1	0	0	0	0
Q05639	EEF1A2	1	0	0	0	0
Q06323	PSME1	0.208628	0.791372	0	0	0
Q06830	PRDX1	1	0	0	0	0
Q07020	RPL18	1	0	0	0	0
Q07021	C1QBP	1	0	0	0	0
Q07812	BAX	1	0	0	0	0
Q07955	SRSF1	1	0	0	0	0
Q07960	ARHGAP1	1	0	0	0	0
Q08257	CRYZ	1	0	0	0	0
Q08752	PPID	0.503572	0.211268	0.28516	0	0
Q09028	RBBP4	1	0	0	0	0
Q10589	BST2	0.20484	0.488748	0.306412	0	0
Q12792	TWF1	1	0	0	0	0
Q12846	STX4	1	0	0	0	0
Q12849	GRSF1	1	0	0	0	0
Q12904	AIMP1	1	0	0	0	0
Q12905	ILF2	1	0	0	0	0
Q12972	PPP1R8	1	0	0	0	0
Q12974	PTP4A2	0.742512	0.257488	0	0	0
Q93096	PTP4A1	0.742512	0.257488	0	0	0
Q13084	MRPL28	1	0	0	0	0
Q13098	GPS1	1	0	0	0	0
Q13126	MTAP	1	0	0	0	0
Q13148	TARDBP	0.478157	0.521843	0	0	0
Q13151	HNRNPA0	1	0	0	0	0
Q13155	AIMP2	0.227418	0.475189	0.297393	0	0
Q13177	PAK2	1	0	0	0	0
Q13153	PAK1	1	0	0	0	0
Q13185	CBX3	0.465874	0.534126	0	0	0
Q13242	SRSF9	0.555689	0.444311	0	0	0
Q13247	SRSF6	0.250936	0.749064	0	0	0
Q13243	SRSF5	0.31666	0.68334	0	0	0
Q13257	MAD2L1	1	0	0	0	0
Q13283	G3BP1	0.548795	0.451205	0	0	0
Q13347	EIF3I	1	0	0	0	0
Q13363	CTBP1	1	0	0	0	0
Q13418	ILK	1	0	0	0	0
Q13442	PDAP1	1	0	0	0	0
Q13445	TMED1	1	0	0	0	0
Q13547	HDAC1	1	0	0	0	0
Q13561	DCTN2	1	0	0	0	0
Q13564	NAE1	1	0	0	0	0
Q13595	TRA2A	0.741515	0.258485	0	0	0
Q13630	GFUS	1	0	0	0	0
Q13636	RAB31	1	0	0	0	0
Q9UL26	RAB22A	1	0	0	0	0
Q13637	RAB32	1	0	0	0	0
Q13838	DDX39B	1	0	0	0	0
Q13868	EXOSC2	0.609391	0.390609	0	0	0
Q13885	TUBB2A	0.712539	0.287461	0	0	0
Q13895	BYSL	1	0	0	0	0
Q13907	IDI1	1	0	0	0	0
Q9BXS1	IDI2	1	0	0	0	0
Q13951	CBFB	1	0	0	0	0
Q14103	HNRNPD	1	0	0	0	0
Q14116	IL18	1	0	0	0	0
Q14165	MLEC	0.464252	0.535748	0	0	0
Q14197	MRPL58	0.402687	0.597313	0	0	0
Q14232	EIF2B1	1	0	0	0	0
Q14320	FAM50A	1	0	0	0	0
Q9Y247	FAM50B	1	0	0	0	0
Q14376	GALE	1	0	0	0	0
Q14498	RBM39	1	0	0	0	0
Q14558	PRPSAP1	1	0	0	0	0
Q14847	LASP1	1	0	0	0	0
Q14914	PTGR1	1	0	0	0	0
Q14964	RAB39A	0.495532	0.504468	0	0	0
Q15005	SPCS2	1	0	0	0	0
Q15008	PSMD6	0.784631	0.215369	0	0	0
Q15019	SEPTIN2	0.433154	0.566846	0	0	0
Q15024	EXOSC7	1	0	0	0	0
Q15056	EIF4H	0.333729	0.666271	0	0	0
Q15084	PDIA6	1	0	0	0	0
Q15102	PAFAH1B3	0.172717	0.30197	0.525313	0	0
Q15125	EBP	1	0	0	0	0
Q15126	PMVK	1	0	0	0	0
Q15165	PON2	0.138497	0.378891	0.482612	0	0
Q15181	PPA1	0.608647	0.166976	0.224378	0	0
Q15185	PTGES3	0.461764	0.538236	0	0	0
Q15233	NONO	0.291949	0.708051	0	0	0
Q15257	PTPA	0.512948	0.487052	0	0	0
Q15286	RAB35	0.362417	0.466357	0.171226	0	0
Q15293	RCN1	1	0	0	0	0
Q15363	TMED2	1	0	0	0	0
Q15365	PCBP1	0.364784	0.261939	0.373276	0	0
Q15366	PCBP2	0.328932	0.671068	0	0	0
Q15404	RSU1	1	0	0	0	0
Q15427	SF3B4	1	0	0	0	0
Q15631	TSN	1	0	0	0	0
Q15645	TRIP13	0.289108	0.710892	0	0	0
Q15691	MAPRE1	1	0	0	0	0
Q15717	ELAVL1	1	0	0	0	0
Q12926	ELAVL2	1	0	0	0	0
Q15738	NSDHL	1	0	0	0	0
Q15785	TOMM34	1	0	0	0	0
Q15907	RAB11B	1	0	0	0	0
P62491	RAB11A	1	0	0	0	0
P57735	RAB25	1	0	0	0	0
Q16181	SEPTIN7	0.52511	0.47489	0	0	0
Q6ZU15	SEPTIN14	0.52511	0.47489	0	0	0
Q16186	ADRM1	1	0	0	0	0
Q16222	UAP1	1	0	0	0	0
Q3KQV9	UAP1L1	1	0	0	0	0
Q16539	MAPK14	1	0	0	0	0
Q16543	CDC37	0.573753	0.426247	0	0	0
Q14195	DPYSL3	1	0	0	0	0
Q16576	RBBP7	0.55124	0.44876	0	0	0
Q16629	SRSF7	1	0	0	0	0
Q16658	FSCN1	1	0	0	0	0
Q16698	DECR1	1	0	0	0	0
Q16719	KYNU	1	0	0	0	0
Q16740	CLPP	0.463437	0.536563	0	0	0
Q16762	TST	1	0	0	0	0
Q17RY6	LY6K	1	0	0	0	0
Q3MHD2	LSM12	1	0	0	0	0
Q3SXM5	HSDL1	0.606991	0.393009	0	0	0
Q3ZCM7	TUBB8	0.495203	0.504797	0	0	0
Q3ZCQ8	TIMM50	0.778953	0.221047	0	0	0
Q4G0N4	NADK2	1	0	0	0	0
Q53FT3	HIKESHI	1	0	0	0	0
Q53GQ0	HSD17B12	0.311983	0.688017	0	0	0
Q562R1	ACTBL2	1	0	0	0	0
Q5JUR7	TEX30	1	0	0	0	0
Q5RKV6	EXOSC6	1	0	0	0	0
Q5T6V5	C9orf64	1	0	0	0	0
Q5VT79	ANXA8L1	0.709519	0.290481	0	0	0
P13928	ANXA8	0.709519	0.290481	0	0	0
Q5VWZ2	LYPLAL1	1	0	0	0	0
Q69YN2	CWF19L1	1	0	0	0	0
Q6DD88	ATL3	1	0	0	0	0
Q6DKI1	RPL7L1	0.670898	0.329102	0	0	0
Q6FI81	CIAPIN1	0.6236	0.3764	0	0	0
Q6IBS0	TWF2	1	0	0	0	0
Q6NVY1	HIBCH	1	0	0	0	0
Q6NZI2	CAVIN1	0.236859	0.763141	0	0	0
Q6P1J9	CDC73	1	0	0	0	0
Q6P587	FAHD1	1	0	0	0	0
Q6YN16	HSDL2	1	0	0	0	0
Q70UQ0	IKBIP	0.586938	0.413062	0	0	0
Q7L1Q6	BZW1	1	0	0	0	0
Q7L2H7	EIF3M	1	0	0	0	0
Q7L5N1	COPS6	0.603975	0.159934	0.23609	0	0
Q9H8S9	MOB1A	1	0	0	0	0
Q7L9L4	MOB1B	1	0	0	0	0
Q7Z2W9	MRPL21	1	0	0	0	0
Q7Z4H8	POGLUT3	1	0	0	0	0
Q7Z4W1	DCXR	0.688868	0.311132	0	0	0
Q7Z7H5	TMED4	0.359432	0.640568	0	0	0
Q86V81	ALYREF	0.496507	0.503493	0	0	0
Q86W42	THOC6	0.600419	0.399581	0	0	0
Q86X76	NIT1	1	0	0	0	0
Q8IUR0	TRAPPC5	1	0	0	0	0
Q8N183	NDUFAF2	1	0	0	0	0
Q8N4Q0	PTGR3	1	0	0	0	0
Q8NBJ7	SUMF2	0.386563	0.613437	0	0	0
Q8NBN7	RDH13	0.3901	0.6099	0	0	0
Q8NBQ5	HSD17B11	0.34245	0.427818	0.229732	0	0
Q8NBS9	TXNDC5	1	0	0	0	0
Q8NBT2	SPC24	1	0	0	0	0
Q8NBU5	ATAD1	1	0	0	0	0
Q8NBX0	SCCPDH	1	0	0	0	0
Q8NC51	SERBP1	0.292296	0.707704	0	0	0
Q8NEJ9	NGDN	1	0	0	0	0
Q8NF37	LPCAT1	1	0	0	0	0
Q8NFH3	NUP43	1	0	0	0	0
Q8NFH4	NUP37	1	0	0	0	0
Q8NFH5	NUP35	1	0	0	0	0
Q8TAE8	GADD45GIP1	1	0	0	0	0
Q8TC12	RDH11	0.228678	0.296041	0.218239	0.257042	0
Q96NR8	RDH12	0.201261	0.370104	0.428635	0	0
Q8TDN6	BRIX1	1	0	0	0	0
Q8TEA8	DTD1	0.182401	0.817599	0	0	0
Q8TED1	GPX8	0.880005	0.119995	0	0	0
Q8WUK0	PTPMT1	0.339869	0.660131	0	0	0
Q8WUY1	THEM6	0.519877	0.480123	0	0	0
Q8WVM0	TFB1M	0.119622	0.392894	0.487484	0	0
Q8WVX9	FAR1	1	0	0	0	0
Q8WVY7	UBLCP1	1	0	0	0	0
Q8WW12	PCNP	1	0	0	0	0
Q8WWY3	PRPF31	1	0	0	0	0
Q8WXF1	PSPC1	1	0	0	0	0
Q92520	FAM3C	1	0	0	0	0
Q92522	H1-10	0.8245	0.1755	0	0	0
Q92552	MRPS27	1	0	0	0	0
Q92572	AP3S1	1	0	0	0	0
Q92600	CNOT9	0.21963	0.351778	0.428592	0	0
Q92688	ANP32B	1	0	0	0	0
Q92734	TFG	1	0	0	0	0
Q92747	ARPC1A	1	0	0	0	0
Q92769	HDAC2	1	0	0	0	0
Q92820	GGH	0.362264	0.37012	0.267616	0	0
Q92879	CELF1	1	0	0	0	0
O95319	CELF2	1	0	0	0	0
Q92882	OSTF1	1	0	0	0	0
Q92890	UFD1	0.273943	0.726057	0	0	0
Q92905	COPS5	1	0	0	0	0
Q92979	EMG1	0.339888	0.660112	0	0	0
Q969G3	SMARCE1	1	0	0	0	0
Q969U7	PSMG2	0.809595	0.190405	0	0	0
Q969X5	ERGIC1	0.501991	0.498009	0	0	0
Q96A33	CCDC47	1	0	0	0	0
Q96A35	MRPL24	1	0	0	0	0
Q96A72	MAGOHB	1	0	0	0	0
P61326	MAGOH	1	0	0	0	0
Q96AB3	ISOC2	1	0	0	0	0
Q96AG4	LRRC59	1	0	0	0	0
Q96BM9	ARL8A	0.54713	0.45287	0	0	0
Q96C19	EFHD2	1	0	0	0	0
Q9BUP0	EFHD1	1	0	0	0	0
Q96C23	GALM	1	0	0	0	0
Q96C36	PYCR2	1	0	0	0	0
Q96C86	DCPS	0.606894	0.393106	0	0	0
Q96CS3	FAF2	0.246393	0.280597	0.47301	0	0
Q96CW1	AP2M1	1	0	0	0	0
Q96DB5	RMDN1	0.5	0.5	0	0	0
Q96DI7	SNRNP40	1	0	0	0	0
Q96EE3	SEH1L	0.654655	0.345345	0	0	0
Q96EK6	GNPNAT1	0.702372	0.297628	0	0	0
Q96FW1	OTUB1	1	0	0	0	0
Q96FX7	TRMT61A	1	0	0	0	0
Q96HE7	ERO1A	1	0	0	0	0
Q86YB8	ERO1B	1	0	0	0	0
Q96HS1	PGAM5	0.798326	0.201674	0	0	0
Q96HY6	DDRGK1	1	0	0	0	0
Q96I24	FUBP3	1	0	0	0	0
Q96I25	RBM17	1	0	0	0	0
Q96IJ6	GMPPA	1	0	0	0	0
Q96IR7	HPDL	1	0	0	0	0
Q96IU4	ABHD14B	1	0	0	0	0
Q96J01	THOC3	1	0	0	0	0
Q96KP4	CNDP2	1	0	0	0	0
Q96L92	SNX27	1	0	0	0	0
Q96PU8	QKI	1	0	0	0	0
Q96S44	TP53RK	1	0	0	0	0
Q99426	TBCB	1	0	0	0	0
Q99436	PSMB7	1	0	0	0	0
Q99439	CNN2	0.623342	0.376658	0	0	0
Q15417	CNN3	0.505422	0.494578	0	0	0
Q99497	PARK7	1	0	0	0	0
Q99536	VAT1	1	0	0	0	0
Q99598	TSNAX	1	0	0	0	0
Q99615	DNAJC7	1	0	0	0	0
Q99623	PHB2	0.405907	0.594093	0	0	0
Q99627	COPS8	1	0	0	0	0
Q99653	CHP1	1	0	0	0	0
Q99714	HSD17B10	0.763533	0.236467	0	0	0
Q99720	SIGMAR1	1	0	0	0	0
Q99729	HNRNPAB	0.39275	0.60725	0	0	0
Q99829	CPNE1	1	0	0	0	0
Q99832	CCT7	1	0	0	0	0
Q99848	EBNA1BP2	1	0	0	0	0
Q99873	PRMT1	1	0	0	0	0
Q9NR22	PRMT8	1	0	0	0	0
Q9BQA1	WDR77	0.844054	0.155946	0	0	0
Q9BQE3	TUBA1C	0.279987	0.277146	0.181345	0.261521	0
Q9BRJ6	C7orf50	1	0	0	0	0
Q9BRJ7	NUDT16L1	1	0	0	0	0
Q9BRP4	PAAF1	1	0	0	0	0
Q9BRQ8	AIFM2	1	0	0	0	0
Q9BRX5	GINS3	1	0	0	0	0
Q9BRX8	PRXL2A	1	0	0	0	0
Q9BSD7	NTPCR	0.565655	0.434345	0	0	0
Q9BSH4	TACO1	1	0	0	0	0
Q9BSV6	TSEN34	1	0	0	0	0
Q9BTE7	DCUN1D5	0.8126	0.1874	0	0	0
Q92564	DCUN1D4	1	0	0	0	0
Q9BTT0	ANP32E	0.481284	0.518716	0	0	0
Q9BTV4	TMEM43	1	0	0	0	0
Q9BTZ2	DHRS4	0.621677	0.247534	0.130789	0	0
Q9BUF5	TUBB6	0.205799	0.336744	0.258291	0.199166	0
Q9BUI4	POLR3C	1	0	0	0	0
Q9BUL8	PDCD10	1	0	0	0	0
Q9BUP3	HTATIP2	1	0	0	0	0
Q9BUT1	BDH2	1	0	0	0	0
Q9BV20	MRI1	0.200765	0.799235	0	0	0
Q9BV86	NTMT1	1	0	0	0	0
Q9BVK6	TMED9	1	0	0	0	0
Q9BWD1	ACAT2	0.488026	0.511974	0	0	0
Q9BWF3	RBM4	1	0	0	0	0
Q9BWM7	SFXN3	1	0	0	0	0
Q9BXS5	AP1M1	1	0	0	0	0
Q9Y6Q5	AP1M2	1	0	0	0	0
Q9BY32	ITPA	0.6257	0.3743	0	0	0
Q9BYD1	MRPL13	1	0	0	0	0
Q9BYD3	MRPL4	0.285303	0.714697	0	0	0
Q9BYG3	NIFK	1	0	0	0	0
Q9BYN8	MRPS26	1	0	0	0	0
Q9BZX2	UCK2	1	0	0	0	0
Q9BZZ5	API5	1	0	0	0	0
Q9GZS3	WDR61	1	0	0	0	0
Q9GZT8	NIF3L1	0.361009	0.638991	0	0	0
Q9GZZ1	NAA50	1	0	0	0	0
Q9H061	TMEM126A	0.551041	0.448959	0	0	0
Q9H074	PAIP1	0.542484	0.457516	0	0	0
Q9H0C8	ILKAP	0.281	0.719	0	0	0
Q9H0S4	DDX47	1	0	0	0	0
Q9H0U4	RAB1B	1	0	0	0	0
Q92928	RAB1C	1	0	0	0	0
Q9H0U6	MRPL18	1	0	0	0	0
Q9H173	SIL1	1	0	0	0	0
Q9H2D1	SLC25A32	0.543895	0.456105	0	0	0
Q9H2P9	DPH5	1	0	0	0	0
Q9H2U2	PPA2	0.523435	0.476565	0	0	0
Q9H2W6	MRPL46	1	0	0	0	0
Q9H3N1	TMX1	0.669128	0.330872	0	0	0
Q9H488	POFUT1	1	0	0	0	0
Q9H4A6	GOLPH3	0.481788	0.35667	0.161542	0	0
Q9H4I3	TRABD	0.442283	0.557717	0	0	0
Q9H7B2	RPF2	0.845292	0.154708	0	0	0
Q9H832	UBE2Z	1	0	0	0	0
Q9H9B4	SFXN1	0.348138	0.331128	0.320733	0	0
Q9H9J2	MRPL44	0.506237	0.493763	0	0	0
Q9HAV7	GRPEL1	1	0	0	0	0
Q9HB07	MYG1	1	0	0	0	0
Q9HB71	CACYBP	1	0	0	0	0
Q9HBM1	SPC25	1	0	0	0	0
Q9HC38	GLOD4	1	0	0	0	0
Q9HCC0	MCCC2	1	0	0	0	0
Q9HCN8	SDF2L1	1	0	0	0	0
Q9HD33	MRPL47	1	0	0	0	0
Q9HDC9	APMAP	1	0	0	0	0
Q9NP72	RAB18	0.622969	0.377031	0	0	0
Q9NP79	VTA1	1	0	0	0	0
Q9NPD3	EXOSC4	1	0	0	0	0
Q9NPD8	UBE2T	1	0	0	0	0
Q9NPJ3	ACOT13	1	0	0	0	0
Q9NQ88	TIGAR	1	0	0	0	0
Q9NQG5	RPRD1B	1	0	0	0	0
Q9NQR4	NIT2	0.548586	0.451414	0	0	0
Q9NR12	PDLIM7	1	0	0	0	0
Q9NR31	SAR1A	1	0	0	0	0
Q9NR45	NANS	0.614289	0.385711	0	0	0
Q9NR56	MBNL1	1	0	0	0	0
Q5VZF2	MBNL2	1	0	0	0	0
Q9NRN7	AASDHPPT	0.557785	0.442215	0	0	0
Q9NRV9	HEBP1	0.191468	0.808532	0	0	0
Q9NRX1	PNO1	1	0	0	0	0
Q9NRX2	MRPL17	1	0	0	0	0
Q9NS69	TOMM22	1	0	0	0	0
Q9NT62	ATG3	1	0	0	0	0
Q9NTK5	OLA1	1	0	0	0	0
Q9NTX5	ECHDC1	1	0	0	0	0
Q9NUQ9	CYRIB	0.5	0.5	0	0	0
Q9H0Q0	CYRIA	0.5	0.5	0	0	0
Q9NUU7	DDX19A	1	0	0	0	0
Q9UMR2	DDX19B	1	0	0	0	0
Q9NV31	IMP3	1	0	0	0	0
Q9NVA2	SEPTIN11	1	0	0	0	0
Q14141	SEPTIN6	0.199915	0.800085	0	0	0
Q9NVD7	PARVA	1	0	0	0	0
Q9HBI1	PARVB	1	0	0	0	0
Q9NVJ2	ARL8B	0.567835	0.432165	0	0	0
Q9NWS0	PIH1D1	1	0	0	0	0
Q9NWU5	MRPL22	1	0	0	0	0
Q9NX63	CHCHD3	0.5432	0.4568	0	0	0
Q9NXW2	DNAJB12	1	0	0	0	0
Q9NYL9	TMOD3	1	0	0	0	0
Q9NZR1	TMOD2	1	0	0	0	0
P28289	TMOD1	1	0	0	0	0
Q9NZ01	TECR	0.57683	0.307054	0.116117	0	0
Q9NZ63	C9orf78	1	0	0	0	0
Q9NZL4	HSPBP1	0.209346	0.654222	0.136432	0	0
Q9NZL9	MAT2B	1	0	0	0	0
Q9P000	COMMD9	0.524933	0.475067	0	0	0
Q9P015	MRPL15	1	0	0	0	0
Q9P016	THYN1	0.300694	0.699306	0	0	0
Q9P032	NDUFAF4	1	0	0	0	0
Q9P0I2	EMC3	1	0	0	0	0
Q9P0L0	VAPA	1	0	0	0	0
Q9P0V9	SEPTIN10	1	0	0	0	0
Q9P258	RCC2	1	0	0	0	0
Q9P289	STK26	0.4846	0.5154	0	0	0
O00506	STK25	0.4846	0.5154	0	0	0
Q9UBB4	ATXN10	1	0	0	0	0
Q9UBE0	SAE1	1	0	0	0	0
Q9UBM7	DHCR7	1	0	0	0	0
Q9UBP6	METTL1	1	0	0	0	0
Q9UBQ0	VPS29	0.147281	0.852719	0	0	0
Q9UBQ5	EIF3K	1	0	0	0	0
Q9UBQ7	GRHPR	0.759993	0.240007	0	0	0
Q9UBR2	CTSZ	1	0	0	0	0
Q9UBS4	DNAJB11	1	0	0	0	0
Q9UBU8	MORF4L1	1	0	0	0	0
Q9UBW8	COPS7A	0.674834	0.325166	0	0	0
Q9UBX3	SLC25A10	0.584903	0.247938	0.16716	0	0
Q9UHD1	CHORDC1	1	0	0	0	0
Q9UHG3	PCYOX1	1	0	0	0	0
Q9UHX1	PUF60	1	0	0	0	0
Q9UHY7	ENOPH1	1	0	0	0	0
Q9UI10	EIF2B4	1	0	0	0	0
Q9UIJ7	AK3	0.797118	0.202882	0	0	0
Q9UJ70	NAGK	1	0	0	0	0
Q9UJZ1	STOML2	1	0	0	0	0
Q9UKD2	MRTO4	0.494977	0.505023	0	0	0
Q9UKK9	NUDT5	1	0	0	0	0
Q9UKM9	RALY	0.152151	0.847849	0	0	0
Q9UKS6	PACSIN3	1	0	0	0	0
Q9UL25	RAB21	0.351593	0.358257	0.29015	0	0
Q9UL46	PSME2	0.859302	0.140698	0	0	0
Q9ULC4	MCTS1	1	0	0	0	0
Q9ULV4	CORO1C	1	0	0	0	0
Q6QEF8	CORO6	1	0	0	0	0
Q9ULX3	NOB1	1	0	0	0	0
Q9UM00	TMCO1	1	0	0	0	0
Q9UMS4	PRPF19	1	0	0	0	0
Q9UN86	G3BP2	1	0	0	0	0
Q9UNE7	STUB1	1	0	0	0	0
Q9UNF0	PACSIN2	1	0	0	0	0
Q9UNH7	SNX6	0.3063	0.6937	0	0	0
Q9UNI6	DUSP12	1	0	0	0	0
Q9UNL2	SSR3	0.714451	0.285549	0	0	0
Q9UNM6	PSMD13	1	0	0	0	0
Q9UNP9	PPIE	1	0	0	0	0
Q9UNQ2	DIMT1	1	0	0	0	0
Q9UNS2	COPS3	1	0	0	0	0
Q9UQ80	PA2G4	0.408328	0.335077	0.256595	0	0
Q9Y221	NIP7	0.676634	0.323366	0	0	0
Q9Y230	RUVBL2	0.811948	0.188052	0	0	0
Q9Y265	RUVBL1	1	0	0	0	0
Q9Y266	NUDC	1	0	0	0	0
Q9Y277	VDAC3	0.31628	0.35453	0.32919	0	0
Q9Y295	DRG1	1	0	0	0	0
Q9Y2P8	RCL1	1	0	0	0	0
Q9Y2Q3	GSTK1	1	0	0	0	0
Q9Y2S7	POLDIP2	1	0	0	0	0
Q9Y2T3	GDA	1	0	0	0	0
Q9Y2X3	NOP58	1	0	0	0	0
Q9Y2Z0	SUGT1	1	0	0	0	0
Q9Y305	ACOT9	0.299823	0.700177	0	0	0
Q9Y314	NOSIP	1	0	0	0	0
Q9Y315	DERA	0.483932	0.516068	0	0	0
Q9Y376	CAB39	1	0	0	0	0
Q9H9S4	CAB39L	1	0	0	0	0
Q9Y399	MRPS2	1	0	0	0	0
Q9Y3A5	SBDS	1	0	0	0	0
Q9Y3B2	EXOSC1	0.765	0.235	0	0	0
Q9Y3B3	TMED7	1	0	0	0	0
Q9Y3B7	MRPL11	1	0	0	0	0
Q9Y3B8	REXO2	1	0	0	0	0
Q9Y3C1	NOP16	1	0	0	0	0
Q9Y3C8	UFC1	1	0	0	0	0
Q9Y3D9	MRPS23	1	0	0	0	0
Q9Y3E5	PTRH2	1	0	0	0	0
Q9Y3F4	STRAP	0.177022	0.644206	0.178772	0	0
Q9Y3Q3	TMED3	1	0	0	0	0
Q9Y3Y2	CHTOP	1	0	0	0	0
Q9Y584	TIMM22	1	0	0	0	0
Q9Y5B8	NME7	1	0	0	0	0
Q9Y5K5	UCHL5	0.386298	0.613702	0	0	0
Q9Y5K8	ATP6V1D	1	0	0	0	0
Q9Y5M8	SRPRB	0.250664	0.437467	0.311869	0	0
Q9Y5Q8	GTF3C5	1	0	0	0	0
Q9Y5S9	RBM8A	1	0	0	0	0
Q9Y5Z4	HEBP2	1	0	0	0	0
Q9Y617	PSAT1	0.559072	0.440928	0	0	0
Q9Y673	ALG5	1	0	0	0	0
Q9Y676	MRPS18B	1	0	0	0	0
Q9Y696	CLIC4	1	0	0	0	0
Q9Y6A4	CFAP20	1	0	0	0	0
Q9Y6B6	SAR1B	1	0	0	0	0
Q9Y6C9	MTCH2	0.470394	0.295142	0.234464	0	0
Q9Y6E2	BZW2	0.323722	0.400409	0.275869	0	0
Q9Y6G5	COMMD10	1	0	0	0	0
Q9Y6I9	TEX264	0.553012	0.446988	0	0	0
Q9Y6M0	PRSS21	1	0	0	0	0
Q9Y6M9	NDUFB9	1	0	0	0	0
Q9Y6N5	SQOR	1	0	0	0	0
	#N/A
	#N/A
	#N/A
	#N/A
	#N/A
	#N/A
	#N/A
	#N/A
	#N/A
	#N/A
	#N/A
	#N/A
	#N/A
	#N/A
	#N/A
	#N/A
	#N/A
	#N/A
	#N/A
	#N/A
	#N/A
	#N/A
	#N/A
	#N/A
	#N/A
	#N/A
	#N/A
	#N/A
	#N/A
	#N/A
	#N/A
	#N/A
	#N/A
	#N/A
	#N/A
	#N/A
	#N/A
	#N/A
	#N/A
	#N/A
	#N/A
	#N/A
	#N/A
	#N/A
	#N/A
	#N/A
	#N/A
	#N/A
	#N/A
	#N/A
	#N/A
	#N/A
	#N/A
	#N/A
	#N/A
	#N/A
	#N/A
	#N/A
	#N/A
	#N/A
	#N/A
	#N/A
	#N/A
	#N/A
	#N/A
	#N/A
	#N/A
	#N/A
	#N/A
	#N/A
	#N/A
	#N/A
	#N/A
	#N/A
	#N/A
	#N/A
	#N/A
	#N/A
	#N/A
	#N/A
	#N/A
	#N/A
	#N/A
	#N/A
	#N/A
	#N/A
	#N/A
	#N/A
	#N/A
	#N/A
	#N/A
	#N/A
	#N/A
	#N/A
	#N/A
	#N/A
	#N/A
	#N/A
	#N/A
	#N/A
	#N/A
	#N/A
	#N/A
	#N/A
	#N/A
	#N/A
	#N/A
	#N/A
	#N/A
	#N/A
	#N/A
	#N/A
	#N/A
	#N/A
	#N/A
	#N/A
	#N/A
	#N/A
	#N/A
	#N/A
	#N/A
	#N/A
	#N/A
	#N/A
	#N/A
	#N/A
	#N/A
	#N/A
	#N/A
	#N/A
	#N/A
	#N/A
	#N/A
	#N/A
	#N/A
	#N/A
	#N/A
	#N/A
	#N/A
	#N/A
	#N/A
	#N/A
	#N/A
	#N/A
	#N/A
	#N/A
	#N/A
	#N/A
	#N/A
	#N/A
	#N/A
	#N/A
	#N/A
	#N/A
	#N/A
	#N/A
	#N/A
	#N/A
	#N/A
	#N/A
	#N/A
	#N/A
	#N/A
	#N/A
	#N/A
	#N/A
	#N/A
	#N/A
	#N/A
	#N/A
	#N/A
	#N/A
	#N/A
	#N/A
	#N/A
	#N/A
	#N/A
	#N/A
	#N/A
	#N/A
	#N/A
	#N/A
	#N/A
	#N/A
	#N/A
	#N/A
	#N/A
	#N/A
	#N/A
	#N/A
	#N/A
	#N/A
	#N/A
	#N/A
	#N/A
	#N/A
	#N/A
	#N/A
	#N/A
	#N/A
	#N/A
	#N/A
	#N/A
	#N/A
	#N/A
	#N/A
	#N/A
	#N/A
	#N/A
	#N/A
	#N/A
	#N/A
	#N/A
	#N/A
	#N/A
	#N/A
	#N/A
	#N/A
	#N/A
	#N/A
	#N/A
	#N/A
	#N/A
	#N/A
	#N/A
	#N/A
	#N/A
	#N/A
	#N/A
	#N/A
	#N/A
	#N/A
	#N/A
	#N/A
	#N/A
	#N/A
	#N/A
	#N/A
	#N/A
	#N/A
	#N/A
	#N/A
	#N/A
	#N/A
	#N/A
	#N/A
	#N/A
	#N/A
	#N/A
	#N/A
	#N/A
	#N/A
	#N/A
	#N/A
	#N/A
	#N/A
	#N/A
	#N/A
	#N/A
	#N/A
	#N/A
	#N/A
	#N/A
	#N/A
	#N/A
	#N/A
	#N/A
	#N/A
	#N/A
	#N/A
	#N/A
	#N/A
	#N/A
	#N/A
	#N/A
	#N/A
	#N/A
	#N/A
	#N/A
	#N/A
	#N/A
	#N/A
	#N/A
	#N/A
	#N/A
	#N/A
	#N/A
	#N/A
	#N/A
	#N/A
	#N/A
	#N/A
	#N/A
	#N/A
	#N/A
	#N/A
	#N/A
	#N/A
	#N/A
	#N/A
	#N/A
	#N/A
	#N/A
	#N/A
	#N/A
	#N/A
	#N/A
	#N/A
	#N/A
	#N/A
	#N/A
	#N/A
	#N/A
	#N/A
	#N/A
	#N/A
	#N/A
	#N/A
	#N/A
	#N/A
	#N/A
	#N/A
	#N/A
	#N/A
	#N/A
	#N/A
	#N/A
	#N/A
	#N/A
	#N/A
	#N/A
	#N/A
	#N/A
	#N/A
	#N/A
	#N/A
	#N/A
	#N/A
	#N/A
	#N/A
	#N/A
	#N/A
	#N/A
	#N/A
	#N/A
	#N/A
	#N/A
	#N/A
	#N/A
	#N/A
	#N/A
	#N/A
	#N/A
	#N/A
	#N/A
	#N/A
	#N/A
	#N/A
	#N/A
	#N/A
	#N/A
	#N/A
	#N/A
	#N/A
	#N/A
	#N/A
	#N/A
	#N/A
	#N/A
	#N/A
	#N/A
	#N/A
	#N/A
	#N/A
	#N/A
	#N/A
	#N/A
	#N/A
	#N/A
	#N/A
	#N/A
	#N/A
	#N/A
	#N/A
	#N/A
	#N/A
	#N/A
	#N/A
	#N/A
	#N/A
	#N/A
	#N/A
	#N/A
	#N/A
	#N/A
	#N/A
	#N/A
	#N/A
	#N/A
	#N/A
	#N/A
	#N/A
	#N/A
	#N/A
	#N/A
	#N/A
	#N/A
	#N/A
	#N/A
	#N/A
	#N/A
	#N/A
	#N/A
	#N/A
	#N/A
	#N/A
	#N/A
	#N/A
	#N/A
	#N/A
	#N/A
	#N/A
	#N/A
	#N/A
	#N/A
	#N/A
	#N/A
	#N/A
	#N/A
	#N/A
	#N/A
	#N/A
	#N/A
	#N/A
	#N/A
	#N/A
	#N/A
	#N/A
	#N/A
	#N/A
	#N/A
	#N/A
	#N/A
	#N/A
	#N/A
	#N/A
	#N/A
	#N/A
	#N/A
	#N/A
	#N/A
	#N/A
	#N/A
	#N/A
	#N/A
	#N/A
	#N/A
	#N/A
	#N/A
	#N/A
	#N/A
	#N/A
	#N/A
	#N/A
	#N/A
	#N/A
	#N/A
	#N/A
	#N/A
	#N/A
	#N/A
	#N/A
	#N/A
	#N/A
	#N/A
	#N/A
	#N/A
	#N/A
	#N/A
	#N/A
	#N/A
	#N/A
	#N/A
	#N/A
	#N/A
	#N/A
	#N/A
	#N/A
	#N/A
	#N/A
	#N/A
	#N/A
	#N/A
	#N/A
	#N/A
	#N/A
	#N/A
	#N/A
	#N/A
	#N/A
	#N/A
	#N/A
	#N/A
	#N/A
	#N/A
	#N/A
	#N/A
	#N/A
	#N/A
	#N/A
	#N/A
	#N/A
	#N/A
	#N/A
	#N/A
	#N/A
	#N/A
	#N/A
	#N/A
	#N/A
	#N/A
	#N/A
	#N/A
	#N/A
	#N/A
	#N/A
	#N/A
	#N/A
	#N/A
	#N/A
	#N/A
	#N/A
	#N/A
	#N/A
	#N/A
	#N/A
	#N/A
	#N/A
	#N/A
	#N/A
	#N/A
	#N/A
	#N/A
	#N/A
	#N/A
	#N/A
	#N/A
	#N/A
	#N/A
	#N/A
	#N/A
	#N/A
	#N/A
	#N/A
	#N/A
	#N/A
	#N/A
	#N/A
	#N/A
	#N/A
	#N/A
	#N/A
	#N/A
	#N/A
	#N/A
	#N/A
	#N/A
	#N/A
	#N/A
	#N/A
	#N/A
	#N/A
	#N/A
	#N/A
	#N/A
	#N/A
	#N/A
	#N/A
	#N/A
	#N/A
	#N/A
	#N/A
	#N/A
	#N/A
	#N/A
	#N/A
	#N/A
	#N/A
	#N/A
	#N/A
	#N/A
	#N/A
	#N/A
	#N/A
	#N/A
	#N/A
	#N/A
	#N/A
	#N/A
	#N/A
	#N/A
	#N/A
	#N/A
	#N/A
	#N/A
	#N/A
	#N/A
	#N/A
	#N/A
	#N/A
	#N/A
	#N/A
	#N/A
	#N/A
	#N/A
	#N/A
	#N/A
	#N/A
	#N/A
	#N/A
	#N/A
	#N/A
	#N/A
	#N/A
	#N/A
	#N/A
	#N/A
	#N/A
	#N/A
	#N/A
	#N/A
	#N/A
	#N/A
	#N/A
	#N/A
	#N/A
	#N/A
	#N/A
	#N/A
	#N/A
	#N/A
	#N/A
	#N/A
	#N/A
	#N/A
	#N/A
	#N/A
	#N/A
	#N/A
	#N/A
	#N/A
	#N/A
	#N/A
	#N/A
	#N/A
	#N/A
	#N/A
	#N/A
	#N/A
	#N/A
	#N/A
	#N/A
	#N/A
	#N/A
	#N/A
	#N/A
	#N/A
	#N/A
	#N/A
	#N/A
	#N/A
	#N/A
	#N/A
	#N/A
	#N/A
	#N/A
	#N/A
	#N/A
	#N/A
	#N/A
	#N/A
	#N/A
	#N/A
	#N/A
	#N/A
	#N/A
	#N/A
	#N/A
	#N/A
	#N/A
	#N/A
	#N/A
	#N/A
	#N/A
	#N/A
	#N/A
	#N/A
	#N/A
	#N/A
	#N/A
	#N/A
	#N/A
	#N/A
	#N/A
	#N/A
	#N/A
	#N/A
	#N/A
	#N/A
	#N/A
	#N/A
	#N/A
	#N/A
	#N/A
	#N/A
	#N/A
	#N/A
	#N/A
	#N/A
	#N/A
	#N/A
	#N/A
	#N/A
	#N/A
	#N/A
	#N/A
	#N/A
	#N/A
	#N/A
	#N/A
	#N/A
	#N/A
	#N/A
	#N/A
	#N/A
	#N/A
	#N/A
	#N/A
	#N/A
	#N/A
	#N/A
	#N/A
	#N/A
	#N/A
	#N/A
	#N/A
	#N/A
	#N/A
	#N/A
	#N/A
	#N/A
	#N/A
	#N/A
	#N/A
	#N/A
	#N/A
	#N/A
	#N/A
	#N/A
	#N/A
	#N/A
	#N/A
	#N/A
	#N/A
	#N/A
	#N/A
	#N/A
	#N/A
	#N/A
	#N/A
	#N/A
	#N/A
	#N/A
	#N/A
	#N/A
	#N/A
	#N/A
	#N/A
	#N/A
	#N/A
	#N/A
	#N/A
	#N/A
	#N/A
	#N/A
	#N/A
	#N/A
	#N/A
[truncated: 226 more rows]

## Sheet: 3
Uniprot #	Gene name	R1_unmodified	R1_monomodified	R1_dimodified	R1_trimodified	R1_tetramodified	R1_modified	R2_unmodified	R2_monomodified	R2_dimodified	R2_trimodified	R2_tetramodified	R2_modified	Average_modified
O75822	EIF3J	0.141339	0.858661	0	0	0	0.858661	0.140994	0.859006	0	0	0	0.859006	0.858834
Q9UKM9	RALY	0.16386	0.83614	0	0	0	0.83614	0.152151	0.847849	0	0	0	0.847849	0.841995
P23193	TCEA1	0.148616	0.851384	0	0	0	0.851384	0.250253	0.749747	0	0	0	0.749747	0.800566
Q9BV20	MRI1	0.202008	0.797992	0	0	0	0.797992	0.200765	0.799235	0	0	0	0.799235	0.798613
P45880	VDAC2	0.249668	0.404215	0.346117	0	0	0.750332	0.18157	0.4017	0.41673	0	0	0.81843	0.784381
Q92890	UFD1	0.16429	0.83571	0	0	0	0.83571	0.273943	0.726057	0	0	0	0.726057	0.780883
O75494	SRSF10	0.229701	0.770299	0	0	0	0.770299	0.230533	0.769467	0	0	0	0.769467	0.769883
Q9NRV9	HEBP1	0.270753	0.729247	0	0	0	0.729247	0.191468	0.808532	0	0	0	0.808532	0.768889
P52907	CAPZA1	0.212358	0.787642	0	0	0	0.787642	0.25451	0.74549	0	0	0	0.74549	0.766566
Q15165	PON2	0.332067	0.390769	0.277164	0	0	0.667933	0.138497	0.378891	0.482612	0	0	0.861503	0.764718
P84077	ARF1	0.294349	0.705651	0	0	0	0.705651	0.191575	0.808425	0	0	0	0.808425	0.757038
P30043	BLVRB	0.130566	0.869434	0	0	0	0.869434	0.36104	0.63896	0	0	0	0.63896	0.754197
Q8NBJ7	SUMF2	0.131078	0.868922	0	0	0	0.868922	0.386563	0.613437	0	0	0	0.613437	0.741179
P31947	SFN	0.251139	0.748861	0	0	0	0.748861	0.269813	0.730187	0	0	0	0.730187	0.739524
P48047	ATP5PO	0.131844	0.868156	0	0	0	0.868156	0.401768	0.598232	0	0	0	0.598232	0.733194
P62913	RPL11	0.338201	0.661799	0	0	0	0.661799	0.229541	0.770459	0	0	0	0.770459	0.716129
P63241	EIF5A	0.220516	0.779484	0	0	0	0.779484	0.366352	0.633648	0	0	0	0.633648	0.706566
Q9GZV4	EIF5A2	0.220516	0.779484	0	0	0	0.779484	0.366352	0.633648	0	0	0	0.633648	0.706566
Q6IS14	EIF5AL1	0.220516	0.779484	0	0	0	0.779484	0.366352	0.633648	0	0	0	0.633648	0.706566
P12236	SLC25A6	0.314014	0.377467	0.308519	0	0	0.685986	0.273748	0.468722	0.25753	0	0	0.726252	0.706119
P30086	PEBP1	0.304364	0.695636	0	0	0	0.695636	0.287751	0.712249	0	0	0	0.712249	0.703943
Q8NC51	SERBP1	0.306785	0.693215	0	0	0	0.693215	0.292296	0.707704	0	0	0	0.707704	0.70046
P05141	SLC25A5	0.332988	0.404657	0.262354	0	0	0.667012	0.270435	0.505634	0.223931	0	0	0.729565	0.698289
Q86V81	ALYREF	0.129022	0.870978	0	0	0	0.870978	0.496507	0.503493	0	0	0	0.503493	0.687236
Q01081	U2AF1	0.274477	0.725523	0	0	0	0.725523	0.358947	0.641053	0	0	0	0.641053	0.683288
P0DN76	#N/A	0.274477	0.725523	0	0	0	0.725523	0.358947	0.641053	0	0	0	0.641053	0.683288
Q15233	NONO	0.34834	0.65166	0	0	0	0.65166	0.291949	0.708051	0	0	0	0.708051	0.679855
P18085	ARF4	0.262147	0.737853	0	0	0	0.737853	0.379606	0.620394	0	0	0	0.620394	0.679123
Q99623	PHB2	0.236398	0.763602	0	0	0	0.763602	0.405907	0.594093	0	0	0	0.594093	0.678848
P15121	AKR1B1	0.241847	0.341325	0.416828	0	0	0.758153	0.42387	0.347034	0.229096	0	0	0.57613	0.667142
Q8WUD1	RAB2B	0.372487	0.627513	0	0	0	0.627513	0.29733	0.70267	0	0	0	0.70267	0.665092
Q15645	TRIP13	0.380968	0.619032	0	0	0	0.619032	0.289108	0.710892	0	0	0	0.710892	0.664962
O14732	IMPA2	0.284225	0.250986	0.464789	0	0	0.715775	0.3873	0.243923	0.368777	0	0	0.6127	0.664237
O00273	DFFA	0.508348	0.491652	0	0	0	0.491652	0.179792	0.820208	0	0	0	0.820208	0.65593
Q92820	GGH	0.328694	0.536168	0.135138	0	0	0.671306	0.362264	0.37012	0.267616	0	0	0.637736	0.654521
Q9H4I3	TRABD	0.2507	0.7493	0	0	0	0.7493	0.442283	0.557717	0	0	0	0.557717	0.653508
P18621	RPL17	0.380671	0.457007	0.162322	0	0	0.619329	0.321058	0.52393	0.155012	0	0	0.678942	0.649135
Q02543	RPL18A	0.394999	0.605001	0	0	0	0.605001	0.307308	0.692692	0	0	0	0.692692	0.648846
P12268	IMPDH2	0.289354	0.710646	0	0	0	0.710646	0.416171	0.583829	0	0	0	0.583829	0.647237
P55039	DRG2	0.535061	0.464939	0	0	0	0.464939	0.17529	0.82471	0	0	0	0.82471	0.644824
Q9Y6I9	TEX264	0.157684	0.842316	0	0	0	0.842316	0.553012	0.446988	0	0	0	0.446988	0.644652
Q9H9B4	SFXN1	0.364162	0.296821	0.339017	0	0	0.635838	0.348138	0.331128	0.320733	0	0	0.651862	0.64385
P51151	RAB9A	0.298151	0.701849	0	0	0	0.701849	0.428341	0.571659	0	0	0	0.571659	0.636754
Q9NP90	RAB9B	0.298151	0.701849	0	0	0	0.701849	0.428341	0.571659	0	0	0	0.571659	0.636754
Q9GZT8	NIF3L1	0.3766	0.6234	0	0	0	0.6234	0.361009	0.638991	0	0	0	0.638991	0.631195
Q00577	PURA	0.2198	0.7802	0	0	0	0.7802	0.530806	0.469194	0	0	0	0.469194	0.624697
Q14964	RAB39A	0.264992	0.735008	0	0	0	0.735008	0.495532	0.504468	0	0	0	0.504468	0.619738
Q08752	PPID	0.263925	0.365884	0.370192	0	0	0.736075	0.503572	0.211268	0.28516	0	0	0.496428	0.616252
Q9UL25	RAB21	0.42463	0.333704	0.241667	0	0	0.57537	0.351593	0.358257	0.29015	0	0	0.648407	0.611889
Q13283	G3BP1	0.244054	0.755946	0	0	0	0.755946	0.548795	0.451205	0	0	0	0.451205	0.603576
Q15366	PCBP2	0.468871	0.531129	0	0	0	0.531129	0.328932	0.671068	0	0	0	0.671068	0.601098
Q99729	HNRNPAB	0.406887	0.593113	0	0	0	0.593113	0.39275	0.60725	0	0	0	0.60725	0.600181
P08729	KRT7	0.616881	0.383119	0	0	0	0.383119	0.188697	0.811303	0	0	0	0.811303	0.597211
O14925	TIMM23	0.412841	0.587159	0	0	0	0.587159	0.393428	0.606572	0	0	0	0.606572	0.596865
P00568	AK1	0.45	0.55	0	0	0	0.55	0.366004	0.633996	0	0	0	0.633996	0.591998
Q9Y305	ACOT9	0.517723	0.482277	0	0	0	0.482277	0.299823	0.700177	0	0	0	0.700177	0.591227
P60953	CDC42	0.479205	0.520795	0	0	0	0.520795	0.341238	0.658762	0	0	0	0.658762	0.589779
Q9H074	PAIP1	0.281748	0.718252	0	0	0	0.718252	0.542484	0.457516	0	0	0	0.457516	0.587884
Q8WUK0	PTPMT1	0.485555	0.514445	0	0	0	0.514445	0.339869	0.660131	0	0	0	0.660131	0.587288
Q9UBX3	SLC25A10	0.251044	0.53076	0.218196	0	0	0.748956	0.584903	0.247938	0.16716	0	0	0.415097	0.582027
P68104	EEF1A1	0.541577	0.458423	0	0	0	0.458423	0.303241	0.696759	0	0	0	0.696759	0.577591
Q5VTE0	EEF1A1P5	0.541577	0.458423	0	0	0	0.458423	0.303241	0.696759	0	0	0	0.696759	0.577591
Q9UKD2	MRTO4	0.364912	0.635088	0	0	0	0.635088	0.494977	0.505023	0	0	0	0.505023	0.570055
P62937	PPIA	0.467072	0.532928	0	0	0	0.532928	0.406112	0.593888	0	0	0	0.593888	0.563408
Q9Y536	PPIAL4A	0.467072	0.532928	0	0	0	0.532928	0.406112	0.593888	0	0	0	0.593888	0.563408
A0A0B4J2A2	PPIAL4C	0.467072	0.532928	0	0	0	0.532928	0.406112	0.593888	0	0	0	0.593888	0.563408
F5H284	PPIAL4D	0.467072	0.532928	0	0	0	0.532928	0.406112	0.593888	0	0	0	0.593888	0.563408
A0A075B759	PPIAL4E	0.467072	0.532928	0	0	0	0.532928	0.406112	0.593888	0	0	0	0.593888	0.563408
P0DN26	PPIAL4F	0.467072	0.532928	0	0	0	0.532928	0.406112	0.593888	0	0	0	0.593888	0.563408
P0DN37	PPIAL4G	0.467072	0.532928	0	0	0	0.532928	0.406112	0.593888	0	0	0	0.593888	0.563408
P09211	GSTP1	0.418424	0.581576	0	0	0	0.581576	0.463967	0.536033	0	0	0	0.536033	0.558804
Q15185	PTGES3	0.42475	0.57525	0	0	0	0.57525	0.461764	0.538236	0	0	0	0.538236	0.556743
Q9H9J2	MRPL44	0.385409	0.614591	0	0	0	0.614591	0.506237	0.493763	0	0	0	0.493763	0.554177
P54619	PRKAG1	0.731125	0.15143	0.117445	0	0	0.268875	0.160641	0.707914	0.131445	0	0	0.839359	0.554117
P12004	PCNA	0.408496	0.591504	0	0	0	0.591504	0.492089	0.507911	0	0	0	0.507911	0.549707
P13693	TPT1	0.342237	0.657763	0	0	0	0.657763	0.558729	0.441271	0	0	0	0.441271	0.549517
Q56UQ5	#N/A	0.342237	0.657763	0	0	0	0.657763	0.558729	0.441271	0	0	0	0.441271	0.549517
Q16740	CLPP	0.446954	0.553046	0	0	0	0.553046	0.463437	0.536563	0	0	0	0.536563	0.544804
P61081	UBE2M	0.59876	0.40124	0	0	0	0.40124	0.31789	0.68211	0	0	0	0.68211	0.541675
P68371	TUBB4B	0.221982	0.778018	0	0	0	0.778018	0.704902	0.295098	0	0	0	0.295098	0.536558
Q969X5	ERGIC1	0.435042	0.564958	0	0	0	0.564958	0.501991	0.498009	0	0	0	0.498009	0.531484
Q9BWD1	ACAT2	0.454198	0.545802	0	0	0	0.545802	0.488026	0.511974	0	0	0	0.511974	0.528888
P41219	PRPH	0.598824	0.401176	0	0	0	0.401176	0.344969	0.655031	0	0	0	0.655031	0.528104
P08670	VIM	0.598824	0.401176	0	0	0	0.401176	0.344969	0.655031	0	0	0	0.655031	0.528104
P62333	PSMC6	0.434161	0.565839	0	0	0	0.565839	0.512069	0.487931	0	0	0	0.487931	0.526885
P13995	MTHFD2	0.449604	0.550396	0	0	0	0.550396	0.503831	0.496169	0	0	0	0.496169	0.523283
P39687	ANP32A	0.450075	0.549925	0	0	0	0.549925	0.509936	0.490064	0	0	0	0.490064	0.519995
O43423	ANP32C	0.450075	0.549925	0	0	0	0.549925	0.509936	0.490064	0	0	0	0.490064	0.519995
Q53GQ0	HSD17B12	0.65452	0.34548	0	0	0	0.34548	0.311983	0.688017	0	0	0	0.688017	0.516748
P49770	EIF2B2	0.676382	0.323618	0	0	0	0.323618	0.292742	0.707258	0	0	0	0.707258	0.515438
P47756	CAPZB	0.563324	0.436676	0	0	0	0.436676	0.406698	0.593302	0	0	0	0.593302	0.514989
P19623	SRM	0.473015	0.526985	0	0	0	0.526985	0.500914	0.499086	0	0	0	0.499086	0.513036
P63151	PPP2R2A	0.301209	0.698791	0	0	0	0.698791	0.681319	0.318681	0	0	0	0.318681	0.508736
O00154	ACOT7	0.4089	0.5911	0	0	0	0.5911	0.575432	0.424568	0	0	0	0.424568	0.507834
Q8WUY1	THEM6	0.466791	0.533209	0	0	0	0.533209	0.519877	0.480123	0	0	0	0.480123	0.506666
P59998	ARPC4	0.813734	0.186266	0	0	0	0.186266	0.176501	0.823499	0	0	0	0.823499	0.504883
Q96QV6	H2AC1	0.432508	0.567492	0	0	0	0.567492	0.561995	0.438005	0	0	0	0.438005	0.502748
P0C0S8	H2AC11	0.432508	0.567492	0	0	0	0.567492	0.561995	0.438005	0	0	0	0.438005	0.502748
Q6FI13	H2AC18	0.432508	0.567492	0	0	0	0.567492	0.561995	0.438005	0	0	0	0.438005	0.502748
P04908	H2AC4	0.432508	0.567492	0	0	0	0.567492	0.561995	0.438005	0	0	0	0.438005	0.502748
Q93077	H2AC6	0.432508	0.567492	0	0	0	0.567492	0.561995	0.438005	0	0	0	0.438005	0.502748
P20671	H2AC7	0.432508	0.567492	0	0	0	0.567492	0.561995	0.438005	0	0	0	0.438005	0.502748
Q9BTM1	H2AJ	0.432508	0.567492	0	0	0	0.567492	0.561995	0.438005	0	0	0	0.438005	0.502748
Q7L7L0	H2AW	0.432508	0.567492	0	0	0	0.567492	0.561995	0.438005	0	0	0	0.438005	0.502748
P46782	RPS5	0.417358	0.416196	0.166445	0	0	0.582642	0.577865	0.302804	0.119331	0	0	0.422135	0.502388
P23396	RPS3	0.489936	0.510064	0	0	0	0.510064	0.52103	0.47897	0	0	0	0.47897	0.494517
Q9NX63	CHCHD3	0.4722	0.5278	0	0	0	0.5278	0.5432	0.4568	0	0	0	0.4568	0.4923
Q9Y221	NIP7	0.343642	0.656358	0	0	0	0.656358	0.676634	0.323366	0	0	0	0.323366	0.489862
Q9NVJ2	ARL8B	0.460342	0.539658	0	0	0	0.539658	0.567835	0.432165	0	0	0	0.432165	0.485912
Q06323	PSME1	0.825272	0.174728	0	0	0	0.174728	0.208628	0.791372	0	0	0	0.791372	0.48305
Q9H0Q0	CYRIA	0.537304	0.462696	0	0	0	0.462696	0.5	0.5	0	0	0	0.5	0.481348
Q9NUQ9	CYRIB	0.537304	0.462696	0	0	0	0.462696	0.5	0.5	0	0	0	0.5	0.481348
P14136	GFAP	0.598824	0.401176	0	0	0	0.401176	0.439438	0.560562	0	0	0	0.560562	0.480869
P60763	RAC3	0.565664	0.434336	0	0	0	0.434336	0.477255	0.522745	0	0	0	0.522745	0.478541
C9JRZ8	AKR1B15	0.450206	0.549794	0	0	0	0.549794	0.602354	0.397646	0	0	0	0.397646	0.47372
Q9NZ01	TECR	0.491987	0.213764	0.294249	0	0	0.508013	0.57683	0.307054	0.116117	0	0	0.42317	0.465592
P04818	TYMS	0.505291	0.494709	0	0	0	0.494709	0.567647	0.432353	0	0	0	0.432353	0.463531
P84243	H3-3A	0.259606	0.740394	0	0	0	0.740394	0.814093	0.185907	0	0	0	0.185907	0.46315
Q71DI3	H3C13	0.259606	0.740394	0	0	0	0.740394	0.814093	0.185907	0	0	0	0.185907	0.46315
P04406	GAPDH	0.679342	0.320658	0	0	0	0.320658	0.39662	0.60338	0	0	0	0.60338	0.462019
P11802	CDK4	0.714466	0.285534	0	0	0	0.285534	0.369554	0.630446	0	0	0	0.630446	0.45799
Q96EE3	SEH1L	0.433707	0.566293	0	0	0	0.566293	0.654655	0.345345	0	0	0	0.345345	0.455819
Q13247	SRSF6	0.841459	0.158541	0	0	0	0.158541	0.250936	0.749064	0	0	0	0.749064	0.453802
O43684	BUB3	0.584171	0.415829	0	0	0	0.415829	0.526046	0.473954	0	0	0	0.473954	0.444892
Q9NR45	NANS	0.503161	0.496839	0	0	0	0.496839	0.614289	0.385711	0	0	0	0.385711	0.441275
P10620	MGST1	0.274839	0.725161	0	0	0	0.725161	0.849357	0.150643	0	0	0	0.150643	0.437902
Q93096	PTP4A1	0.383982	0.616018	0	0	0	0.616018	0.742512	0.257488	0	0	0	0.257488	0.436753
P61019	RAB2A	0.572854	0.427146	0	0	0	0.427146	0.553855	0.446145	0	0	0	0.446145	0.436646
P62140	PPP1CB	0.632263	0.367737	0	0	0	0.367737	0.51324	0.48676	0	0	0	0.48676	0.427249
P30740	SERPINB1	0.441096	0.558904	0	0	0	0.558904	0.708909	0.291091	0	0	0	0.291091	0.424997
P50453	SERPINB9	0.441096	0.558904	0	0	0	0.558904	0.708909	0.291091	0	0	0	0.291091	0.424997
Q01105	SET	0.549719	0.450281	0	0	0	0.450281	0.603466	0.396534	0	0	0	0.396534	0.423408
P0DME0	SETSIP	0.549719	0.450281	0	0	0	0.450281	0.603466	0.396534	0	0	0	0.396534	0.423408
P50213	IDH3A	0.607229	0.392771	0	0	0	0.392771	0.554463	0.445537	0	0	0	0.445537	0.419154
O75607	NPM3	0.562188	0.230306	0.207506	0	0	0.437812	0.600355	0.234619	0.165026	0	0	0.399645	0.418728
O75223	GGCT	0.421799	0.578201	0	0	0	0.578201	0.756606	0.243394	0	0	0	0.243394	0.410797
O14684	PTGES	0.800889	0.199111	0	0	0	0.199111	0.380232	0.619768	0	0	0	0.619768	0.40944
Q13148	TARDBP	0.71073	0.28927	0	0	0	0.28927	0.478157	0.521843	0	0	0	0.521843	0.405556
P62191	PSMC1	0.535547	0.464453	0	0	0	0.464453	0.662961	0.337039	0	0	0	0.337039	0.400746
P62280	RPS11	0.468202	0.531798	0	0	0	0.531798	0.732899	0.267101	0	0	0	0.267101	0.399449
O00743	PPP6C	0.544801	0.455199	0	0	0	0.455199	0.666988	0.333012	0	0	0	0.333012	0.394105
P22234	PAICS	0.482864	0.517136	0	0	0	0.517136	0.738695	0.261305	0	0	0	0.261305	0.389221
P04083	ANXA1	0.599353	0.400647	0	0	0	0.400647	0.644688	0.355312	0	0	0	0.355312	0.377979
P15880	RPS2	0.619463	0.380537	0	0	0	0.380537	0.633562	0.366438	0	0	0	0.366438	0.373488
P63000	RAC1	0.68123	0.31877	0	0	0	0.31877	0.580857	0.419143	0	0	0	0.419143	0.368957
P15153	RAC2	0.68123	0.31877	0	0	0	0.31877	0.580857	0.419143	0	0	0	0.419143	0.368957
P46781	RPS9	0.558247	0.441753	0	0	0	0.441753	0.712639	0.287361	0	0	0	0.287361	0.364557
Q9Y315	DERA	0.791891	0.208109	0	0	0	0.208109	0.483932	0.516068	0	0	0	0.516068	0.362088
P35270	SPR	0.692318	0.307682	0	0	0	0.307682	0.601182	0.398818	0	0	0	0.398818	0.35325
Q14165	MLEC	0.833195	0.166805	0	0	0	0.166805	0.464252	0.535748	0	0	0	0.535748	0.351276
Q13868	EXOSC2	0.691591	0.308409	0	0	0	0.308409	0.609391	0.390609	0	0	0	0.390609	0.349509
P49411	TUFM	0.756536	0.243464	0	0	0	0.243464	0.556962	0.443038	0	0	0	0.443038	0.343251
P61026	RAB10	0.611434	0.388566	0	0	0	0.388566	0.708043	0.291957	0	0	0	0.291957	0.340262
P83731	RPL24	0.748304	0.251696	0	0	0	0.251696	0.586669	0.413331	0	0	0	0.413331	0.332514
P04075	ALDOA	0.70195	0.29805	0	0	0	0.29805	0.644932	0.355068	0	0	0	0.355068	0.326559
P05062	ALDOB	0.70195	0.29805	0	0	0	0.29805	0.644932	0.355068	0	0	0	0.355068	0.326559
P61586	RHOA	0.688511	0.311489	0	0	0	0.311489	0.671019	0.328981	0	0	0	0.328981	0.320235
P52597	HNRNPF	0.70491	0.29509	0	0	0	0.29509	0.65524	0.34476	0	0	0	0.34476	0.319925
P62753	RPS6	0.674222	0.325778	0	0	0	0.325778	0.692409	0.307591	0	0	0	0.307591	0.316685
Q9UBW8	COPS7A	0.693999	0.306001	0	0	0	0.306001	0.674834	0.325166	0	0	0	0.325166	0.315584
P61247	RPS3A	0.707518	0.292482	0	0	0	0.292482	0.6726	0.3274	0	0	0	0.3274	0.309941
O00232	PSMD12	0.759439	0.240561	0	0	0	0.240561	0.63333	0.36667	0	0	0	0.36667	0.303616
O95571	ETHE1	0.650342	0.349658	0	0	0	0.349658	0.742801	0.257199	0	0	0	0.257199	0.303428
Q8TED1	GPX8	0.51805	0.48195	0	0	0	0.48195	0.880005	0.119995	0	0	0	0.119995	0.300973
P43686	PSMC4	0.753509	0.246491	0	0	0	0.246491	0.645136	0.354864	0	0	0	0.354864	0.300677
P51991	HNRNPA3	0.638776	0.361224	0	0	0	0.361224	0.760296	0.239704	0	0	0	0.239704	0.300464
P62917	RPL8	0.687822	0.312178	0	0	0	0.312178	0.711942	0.288058	0	0	0	0.288058	0.300118
Q9H3N1	TMX1	0.733865	0.266135	0	0	0	0.266135	0.669128	0.330872	0	0	0	0.330872	0.298504
P13928	ANXA8	0.713552	0.286448	0	0	0	0.286448	0.709519	0.290481	0	0	0	0.290481	0.288464
Q5VT79	ANXA8L1	0.713552	0.286448	0	0	0	0.286448	0.709519	0.290481	0	0	0	0.290481	0.288464
P13861	PRKAR2A	0.690373	0.309627	0	0	0	0.309627	0.73506	0.26494	0	0	0	0.26494	0.287284
P31323	PRKAR2B	0.690373	0.309627	0	0	0	0.309627	0.73506	0.26494	0	0	0	0.26494	0.287284
Q9Y230	RUVBL2	0.614441	0.385559	0	0	0	0.385559	0.811948	0.188052	0	0	0	0.188052	0.286806
Q00796	SORD	0.824683	0.175317	0	0	0	0.175317	0.611068	0.388932	0	0	0	0.388932	0.282125
P46778	RPL21	0.783567	0.216433	0	0	0	0.216433	0.661578	0.338422	0	0	0	0.338422	0.277428
Q99439	CNN2	0.839829	0.160171	0	0	0	0.160171	0.623342	0.376658	0	0	0	0.376658	0.268414
P17980	PSMC3	0.814686	0.185314	0	0	0	0.185314	0.648615	0.351385	0	0	0	0.351385	0.26835
P22087	FBL	0.637859	0.362141	0	0	0	0.362141	0.833503	0.166497	0	0	0	0.166497	0.264319
Q6DKI1	RPL7L1	0.8043	0.1957	0	0	0	0.1957	0.670898	0.329102	0	0	0	0.329102	0.262401
O75340	PDCD6	0.8301	0.1699	0	0	0	0.1699	0.650307	0.349693	0	0	0	0.349693	0.259797
P00492	HPRT1	0.713426	0.286574	0	0	0	0.286574	0.776795	0.223205	0	0	0	0.223205	0.25489
P78346	RPP30	0.806866	0.193134	0	0	0	0.193134	0.687961	0.312039	0	0	0	0.312039	0.252586
Q9UL46	PSME2	0.644509	0.355491	0	0	0	0.355491	0.859302	0.140698	0	0	0	0.140698	0.248095
P62249	RPS16	0.797124	0.202876	0	0	0	0.202876	0.720643	0.279357	0	0	0	0.279357	0.241117
P04899	GNAI2	0.741726	0.258274	0	0	0	0.258274	0.780347	0.219653	0	0	0	0.219653	0.238963
Q99714	HSD17B10	0.762873	0.237127	0	0	0	0.237127	0.763533	0.236467	0	0	0	0.236467	0.236797
P62136	PPP1CA	0.766927	0.233073	0	0	0	0.233073	0.771979	0.228021	0	0	0	0.228021	0.230547
O43488	AKR7A2	0.717115	0.282885	0	0	0	0.282885	0.839546	0.160454	0	0	0	0.160454	0.22167
Q3ZCQ8	TIMM50	0.804735	0.195265	0	0	0	0.195265	0.778953	0.221047	0	0	0	0.221047	0.208156
O95299	NDUFA10	0.753393	0.246607	0	0	0	0.246607	0.841307	0.158693	0	0	0	0.158693	0.20265
P62826	RAN	0.768089	0.231911	0	0	0	0.231911	0.828908	0.171092	0	0	0	0.171092	0.201501
O00764	PDXK	0.796067	0.203933	0	0	0	0.203933	0.805	0.195	0	0	0	0.195	0.199466
Q96HS1	PGAM5	0.803423	0.196577	0	0	0	0.196577	0.798326	0.201674	0	0	0	0.201674	0.199125
P30519	HMOX2	0.842294	0.157706	0	0	0	0.157706	0.77704	0.22296	0	0	0	0.22296	0.190333
Q8NHP1	AKR7L	0.77308	0.22692	0	0	0	0.22692	0.87321	0.12679	0	0	0	0.12679	0.176855
P11908	PRPS2	0.845715	0.154285	0	0	0	0.154285	0.809667	0.190333	0	0	0	0.190333	0.172309
P32969	RPL9	0.849275	0.150725	0	0	0	0.150725	0.852619	0.147381	0	0	0	0.147381	0.149053

## Sheet: 4
Uniprot #	Gene name	Unmodified	Monomodified	Dimodified
Q9BUI4	POLR3C	0.137708	0.862292	0
Q9NYB0	TERF2IP	0.184173	0.52543	0.290396
P14136	GFAP	0.195259	0.804741	0
P62917	RPL8	0.197277	0.802723	0
P12235	SLC25A4	0.209631	0.209631	0.580738
Q96DU9	PABPC5	0.229266	0.770734	0
Q9H1E3	NUCKS1	0.2383	0.7617	0
P42766	RPL35	0.240046	0.759954	0
P62847	RPS24	0.256876	0.743124	0
Q6UWP8	SBSN	0.292644	0.232008	0.475348
P46778	RPL21	0.294978	0.705022	0
P67809	YBX1	0.299201	0.700799	0
P51991	HNRNPA3	0.300847	0.699153	0
P54709	ATP1B3	0.310222	0.689778	0
Q58FF8	HSP90AB2P	0.332897	0.667103	0
Q92575	UBXN4	0.335614	0.664386	0
P57721	PCBP3	0.350522	0.649478	0
Q96HS1	PGAM5	0.353664	0.646336	0
P16989	YBX3	0.358411	0.641589	0
Q9Y2T7	YBX2	0.358411	0.641589	0
Q9UN86	G3BP2	0.36191	0.63809	0
P55209	NAP1L1	0.372086	0.627914	0
P35613	BSG	0.374827	0.625173	0
Q99733	NAP1L4	0.386526	0.613474	0
P61978	HNRNPK	0.388091	0.611909	0
P63092	GNAS	0.394549	0.605451	0
P38405	GNAL	0.394549	0.605451	0
P15170	GSPT1	0.411824	0.588176	0
Q9NRX1	PNO1	0.433167	0.566833	0
Q06265	EXOSC9	0.459482	0.540518	0
Q15366	PCBP2	0.473408	0.526592	0
P62280	RPS11	0.474973	0.525027	0
P00966	ASS1	0.5	0.5	0
P43307	SSR1	0.5	0.5	0
P11488	GNAT1	0.501305	0.498695	0
P19087	GNAT2	0.501305	0.498695	0
P09471	GNAO1	0.501305	0.498695	0
A8MTJ3	GNAT3	0.501305	0.498695	0
P27797	CALR	0.572091	0.427909	0
P47914	RPL29	0.610653	0.389347	0
P61803	DAD1	0.6118	0.3882	0
P07305	H1-0	0.623428	0.376572	0
Q9Y376	CAB39	0.65554	0.34446	0
Q9H9S4	CAB39L	0.65554	0.34446	0
Q01105	SET	0.687407	0.312593	0
P0DME0	SETSIP	0.687407	0.312593	0
P46736	BRCC3	0.69096	0.30904	0
O95670	ATP6V1G2	0.700989	0.299011	0
P62861	FAU	0.762897	0.237103	0
Q9Y3B3	TMED7	0.775338	0.224662	0
P50395	GDI2	0.788894	0.211106	0
Q9NVM6	DNAJC17	0.8062	0.1938	0
P15531	NME1	0.843429	0.156571	0
P55769	SNU13	0.844762	0.155238	0
Q9H9J2	MRPL44	0.859296	0.140704	0
P00558	PGK1	0.859844	0.140156	0
P07205	PGK2	0.859844	0.140156	0
Q9H9B4	SFXN1	0.860609	0.139391	0
P55145	MANF	0.865052	0.134948	0
P67812	SEC11A	0.868182	0.131818	0
P0C7V7	SEC11B	0.868182	0.131818	0
Q00535	CDK5	0.871988	0.128012	0
P78346	RPP30	0.880026	0.119974	0
P05161	ISG15	0.897376	0.102624	0
Q9H871	RMND5A	0.897411	0.102589	0
Q96G75	RMND5B	0.897411	0.102589	0
P05787	KRT8	1	0	0
P08729	KRT7	1	0	0
Q04695	KRT17	1	0	0
P69892	HBG2	1	0	0
P69891	HBG1	1	0	0
P02100	HBE1	1	0	0
A6NDG6	PGP	1	0	0
A6NDU8	RIMOC1	1	0	0
A6NIH7	UNC119B	1	0	0
Q13432	UNC119	1	0	0
A8MXV4	NUDT19	1	0	0
O00148	DDX39A	1	0	0
O00151	PDLIM1	1	0	0
O00154	ACOT7	1	0	0
O00165	HAX1	1	0	0
O00170	AIP	1	0	0
O00217	NDUFS8	1	0	0
O00231	PSMD11	1	0	0
O00232	PSMD12	1	0	0
O00233	PSMD9	1	0	0
O00264	PGRMC1	1	0	0
O00273	DFFA	1	0	0
O00299	CLIC1	1	0	0
O00303	EIF3F	1	0	0
O00422	SAP18	1	0	0
O00442	RTCA	1	0	0
O00483	NDUFA4	1	0	0
O00487	PSMD14	1	0	0
O00505	KPNA3	1	0	0
O00560	SDCBP	1	0	0
O00629	KPNA4	1	0	0
O00743	PPP6C	1	0	0
O00762	UBE2C	1	0	0
O00764	PDXK	1	0	0
O14530	TXNDC9	1	0	0
P47813	EIF1AX	1	0	0
O14602	EIF1AY	1	0	0
O14656	TOR1A	1	0	0
O14657	TOR1B	1	0	0
O14737	PDCD5	1	0	0
O14745	SLC9A3R1	1	0	0
O14818	PSMA7	1	0	0
Q8TAA3	PSMA8	1	0	0
O14828	SCAMP3	1	0	0
O14879	IFIT3	1	0	0
O14880	MGST3	1	0	0
O14908	GIPC1	1	0	0
O14933	UBE2L6	1	0	0
O14949	UQCRQ	1	0	0
P19105	MYL12A	1	0	0
O14950	MYL12B	1	0	0
P24844	MYL9	1	0	0
O14966	RAB29	1	0	0
O15116	LSM1	1	0	0
O15145	ARPC3	1	0	0
O15160	POLR1C	1	0	0
O15173	PGRMC2	1	0	0
O15269	SPTLC1	1	0	0
O15347	HMGB3	1	0	0
O15372	EIF3H	1	0	0
O15392	BIRC5	1	0	0
O15400	STX7	1	0	0
O15460	P4HA2	1	0	0
O15498	YKT6	1	0	0
O15511	ARPC5	1	0	0
O43148	RNMT	1	0	0
O43169	CYB5B	1	0	0
O43172	PRPF4	1	0	0
O43181	NDUFS4	1	0	0
O43237	DYNC1LI2	1	0	0
O43324	EEF1E1	1	0	0
O43396	TXNL1	1	0	0
O43399	TPD52L2	1	0	0
O43402	EMC8	1	0	0
O43447	PPIH	1	0	0
Q8NHP1	AKR7L	1	0	0
O95154	AKR7A3	1	0	0
O43583	DENR	1	0	0
O43598	DNPH1	1	0	0
O43617	TRAPPC3	1	0	0
O43660	PLRG1	1	0	0
O43670	ZNF207	1	0	0
O43681	GET3	1	0	0
O43684	BUB3	1	0	0
O43765	SGTA	1	0	0
O43772	SLC25A20	1	0	0
O43809	NUDT21	1	0	0
O43818	RRP9	1	0	0
O43920	NDUFS5	1	0	0
O60232	ZNRD2	1	0	0
O60256	PRPSAP2	1	0	0
O60493	SNX3	1	0	0
O60547	GMDS	1	0	0
O60573	EIF4E2	1	0	0
O60664	PLIN3	1	0	0
O60701	UGDH	1	0	0
O60739	EIF1B	1	0	0
O60762	DPM1	1	0	0
O60783	MRPS14	1	0	0
O60784	TOM1	1	0	0
O60814	H2BC12	1	0	0
P57053	H2BC12L	1	0	0
O60832	DKC1	1	0	0
O60869	EDF1	1	0	0
O60884	DNAJA2	1	0	0
O60925	PFDN1	1	0	0
O75131	CPNE3	1	0	0
Q96FN4	CPNE2	1	0	0
Q8WWF6	DNAJB3	1	0	0
Q8NHS0	DNAJB8	1	0	0
O75208	COQ9	1	0	0
O75223	GGCT	1	0	0
O75312	ZPR1	1	0	0
O75340	PDCD6	1	0	0
O75347	TBCA	1	0	0
O75351	VPS4B	1	0	0
O75367	MACROH2A1	1	0	0
O75396	SEC22B	1	0	0
O75414	NME6	1	0	0
O75436	VPS26A	1	0	0
O75477	ERLIN1	1	0	0
O75521	ECI2	1	0	0
O75569	PRKRA	1	0	0
O75607	NPM3	1	0	0
O75608	LYPLA1	1	0	0
O75629	CREG1	1	0	0
O75663	TIPRL	1	0	0
O75695	RP2	1	0	0
O75718	CRTAP	1	0	0
O75792	RNASEH2A	1	0	0
O75794	CDC123	1	0	0
O75821	EIF3G	1	0	0
O75822	EIF3J	1	0	0
O75828	CBR3	1	0	0
O75832	PSMD10	1	0	0
O75934	BCAS2	1	0	0
O75935	DCTN3	1	0	0
O75937	DNAJC8	1	0	0
O75940	SMNDC1	1	0	0
O75947	ATP5PD	1	0	0
O75955	FLOT1	1	0	0
O75964	ATP5MG	1	0	0
O76003	GLRX3	1	0	0
O76071	CIAO1	1	0	0
O76075	DFFB	1	0	0
O94760	DDAH1	1	0	0
O94766	B3GAT3	1	0	0
O94788	ALDH1A2	1	0	0
O94888	UBXN7	1	0	0
O94905	ERLIN2	1	0	0
O95059	RPP14	1	0	0
O95159	ZFPL1	1	0	0
O95168	NDUFB4	1	0	0
O95218	ZRANB2	1	0	0
O95219	SNX4	1	0	0
O95249	GOSR1	1	0	0
O95292	VAPB	1	0	0
O95295	SNAPIN	1	0	0
O95299	NDUFA10	1	0	0
O95336	PGLS	1	0	0
O95372	LYPLA2	1	0	0
O95376	ARIH2	1	0	0
O95394	PGM3	1	0	0
O95433	AHSA1	1	0	0
O95456	PSMG1	1	0	0
O95551	TDP2	1	0	0
O95571	ETHE1	1	0	0
O95619	YEATS4	1	0	0
O95630	STAMBP	1	0	0
O95707	POP4	1	0	0
O95721	SNAP29	1	0	0
O95747	OXSR1	1	0	0
O95749	GGPS1	1	0	0
O95777	LSM8	1	0	0
O95801	TTC4	1	0	0
O95816	BAG2	1	0	0
O95825	CRYZL1	1	0	0
O95861	BPNT1	1	0	0
O95865	DDAH2	1	0	0
O95881	TXNDC12	1	0	0
O95926	SYF2	1	0	0
O95983	MBD3	1	0	0
O96000	NDUFB10	1	0	0
O96008	TOMM40	1	0	0
O96011	PEX11B	1	0	0
O96019	ACTL6A	1	0	0
O94805	ACTL6B	1	0	0
P00167	CYB5A	1	0	0
P00374	DHFR	1	0	0
Q86XF0	DHFR2	1	0	0
P00387	CYB5R3	1	0	0
P00491	PNP	1	0	0
P00492	HPRT1	1	0	0
P00568	AK1	1	0	0
P00918	CA2	1	0	0
P01111	NRAS	1	0	0
P01116	KRAS	1	0	0
P01889	HLA-B	1	0	0
Q31610	HLA-B	1	0	0
P30486	HLA-B	1	0	0
P01892	HLA-A	1	0	0
P30459	HLA-A	1	0	0
P10314	HLA-A	1	0	0
P30512	HLA-A	1	0	0
P16189	HLA-A	1	0	0
Q09160	HLA-A	1	0	0
P30511	HLA-F	1	0	0
P04062	GBA	1	0	0
P04066	FUCA1	1	0	0
P04075	ALDOA	1	0	0
P05062	ALDOB	1	0	0
P04080	CSTB	1	0	0
P04083	ANXA1	1	0	0
P04181	OAT	1	0	0
P04183	TK1	1	0	0
P04350	TUBB4A	1	0	0
P04406	GAPDH	1	0	0
P04632	CAPNS1	1	0	0
Q96L46	CAPNS2	1	0	0
P04637	TP53	1	0	0
P04792	HSPB1	1	0	0
P04818	TYMS	1	0	0
P04899	GNAI2	1	0	0
Q93077	H2AC6	1	0	0
Q7L7L0	H2AW	1	0	0
P04908	H2AC4	1	0	0
P05026	ATP1B1	1	0	0
P05114	HMGN1	1	0	0
P05198	EIF2S1	1	0	0
P05388	RPLP0	1	0	0
Q8NHW5	RPLP0P6	1	0	0
P05412	JUN	1	0	0
P17535	JUND	1	0	0
P05455	SSB	1	0	0
P05783	KRT18	1	0	0
P06132	UROD	1	0	0
P06730	EIF4E	1	0	0
A6NMX2	EIF4E1B	1	0	0
P06733	ENO1	1	0	0
P13929	ENO3	1	0	0
P06746	POLB	1	0	0
P06748	NPM1	1	0	0
P06753	TPM3	1	0	0
P07203	GPX1	1	0	0
P07237	P4HB	1	0	0
P07311	ACYP1	1	0	0
P07355	ANXA2	1	0	0
A6NMY6	ANXA2P2	1	0	0
P07437	TUBB	1	0	0
A6NNZ2	TUBB8B	1	0	0
Q9H4B7	TUBB1	1	0	0
P07737	PFN1	1	0	0
P07741	APRT	1	0	0
Q14568	HSP90AA2P	1	0	0
Q58FG0	HSP90AA5P	1	0	0
Q58FG1	HSP90AA4P	1	0	0
P07910	HNRNPC	1	0	0
O60812	HNRNPCL1	1	0	0
B2RXH8	HNRNPCL2	1	0	0
P0DMR1	HNRNPCL4	1	0	0
B7ZW38	HNRNPCL3	1	0	0
P07948	LYN	1	0	0
P08397	HMBS	1	0	0
P08559	PDHA1	1	0	0
P29803	PDHA2	1	0	0
P08579	SNRPB2	1	0	0
P08670	VIM	1	0	0
P17661	DES	1	0	0
P41219	PRPH	1	0	0
P08708	RPS17	1	0	0
P08754	GNAI3	1	0	0
P08865	RPSA	1	0	0
P09012	SNRPA	1	0	0
P09104	ENO2	1	0	0
P09132	SRP19	1	0	0
P09211	GSTP1	1	0	0
P09234	SNRPC	1	0	0
P09417	QDPR	1	0	0
P09429	HMGB1	1	0	0
B2RPK0	HMGB1P1	1	0	0
P09622	DLD	1	0	0
P09661	SNRPA1	1	0	0
P09913	IFIT2	1	0	0
P09914	IFIT1	1	0	0
P09936	UCHL1	1	0	0
P09972	ALDOC	1	0	0
Q71UI9	H2AZ2	1	0	0
P0C0S5	H2AZ1	1	0	0
Q99878	H2AC14	1	0	0
Q96KK5	H2AC12	1	0	0
Q9BTM1	H2AJ	1	0	0
P20671	H2AC7	1	0	0
P0C0S8	H2AC11	1	0	0
Q01081	U2AF1	1	0	0
P0DN76	#N/A	1	0	0
Q8WU68	U2AF1L4	1	0	0
P35520	CBS	1	0	0
P0DN79	#N/A	1	0	0
P10316	HLA-A	1	0	0
P01891	HLA-A	1	0	0
P30453	HLA-A	1	0	0
P30457	HLA-A	1	0	0
P30450	HLA-A	1	0	0
P18462	HLA-A	1	0	0
P30456	HLA-A	1	0	0
P16190	HLA-A	1	0	0
P10321	HLA-C	1	0	0
P10599	TXN	1	0	0
P10644	PRKAR1A	1	0	0
P10768	ESD	1	0	0
P10809	HSPD1	1	0	0
P11172	UMPS	1	0	0
P11182	DBT	1	0	0
P11233	RALA	1	0	0
P11234	RALB	1	0	0
P11441	UBL4A	1	0	0
P11766	ADH5	1	0	0
P11802	CDK4	1	0	0
P11908	PRPS2	1	0	0
P12004	PCNA	1	0	0
P12268	IMPDH2	1	0	0
P12273	PIP	1	0	0
P12277	CKB	1	0	0
P06239	LCK	1	0	0
P12955	PEPD	1	0	0
P13674	P4HA1	1	0	0
P13693	TPT1	1	0	0
Q9HAU6	TPT1P8	1	0	0
Q56UQ5	#N/A	1	0	0
P13861	PRKAR2A	1	0	0
P13984	GTF2F2	1	0	0
P13995	MTHFD2	1	0	0
P14174	MIF	1	0	0
P14550	AKR1A1	1	0	0
P14618	PKM	1	0	0
P14635	CCNB1	1	0	0
P63162	SNRPN	1	0	0
P14678	SNRPB	1	0	0
P14927	UQCRB	1	0	0
P15104	GLUL	1	0	0
P15121	AKR1B1	1	0	0
C9JRZ8	AKR1B15	1	0	0
P15374	UCHL3	1	0	0
P15880	RPS2	1	0	0
P15927	RPA2	1	0	0
P16083	NQO2	1	0	0
P16104	H2AX	1	0	0
Q96QV6	H2AC1	1	0	0
P16152	CBR1	1	0	0
P16220	CREB1	1	0	0
P16333	NCK1	1	0	0
O43639	NCK2	1	0	0
P16403	H1-2	1	0	0
P16949	STMN1	1	0	0
P17028	ZNF24	1	0	0
P17152	TMEM11	1	0	0
P17568	NDUFB7	1	0	0
P17612	PRKACA	1	0	0
P17931	LGALS3	1	0	0
P17980	PSMC3	1	0	0
P17987	TCP1	1	0	0
P18031	PTPN1	1	0	0
P18077	RPL35A	1	0	0
P18085	ARF4	1	0	0
P18124	RPL7	1	0	0
P18621	RPL17	1	0	0
P18754	RCC1	1	0	0
P18847	ATF3	1	0	0
P19387	POLR2C	1	0	0
P19388	POLR2E	1	0	0
P19623	SRM	1	0	0
P19784	CSNK2A2	1	0	0
P20338	RAB4A	1	0	0
P20339	RAB5A	1	0	0
P20340	RAB6A	1	0	0
Q9NRW1	RAB6B	1	0	0
Q14964	RAB39A	1	0	0
P21266	GSTM3	1	0	0
P46439	GSTM5	1	0	0
P21796	VDAC1	1	0	0
P21964	COMT	1	0	0
P22061	PCMT1	1	0	0
P22087	FBL	1	0	0
P22392	NME2	1	0	0
O60361	NME2P1	1	0	0
P22626	HNRNPA2B1	1	0	0
P23193	TCEA1	1	0	0
Q15560	TCEA2	1	0	0
P23381	WARS1	1	0	0
P23396	RPS3	1	0	0
Q16778	H2BC21	1	0	0
P33778	H2BC3	1	0	0
P23527	H2BC17	1	0	0
Q8N257	H2BU1	1	0	0
Q96A08	H2BC1	1	0	0
P23528	CFL1	1	0	0
P23919	DTYMK	1	0	0
P24534	EEF1B2	1	0	0
P24666	ACP1	1	0	0
P25325	MPST	1	0	0
P25398	RPS12	1	0	0
P25685	DNAJB1	1	0	0
P25786	PSMA1	1	0	0
P25787	PSMA2	1	0	0
P25788	PSMA3	1	0	0
P25789	PSMA4	1	0	0
P26368	U2AF2	1	0	0
P26583	HMGB2	1	0	0
P26885	FKBP2	1	0	0
P27144	AK4	1	0	0
P27348	YWHAQ	1	0	0
P27361	MAPK3	1	0	0
P27635	RPL10	1	0	0
Q96L21	RPL10L	1	0	0
P27695	APEX1	1	0	0
P27707	DCK	1	0	0
P28066	PSMA5	1	0	0
P28072	PSMB6	1	0	0
P28161	GSTM2	1	0	0
Q03013	GSTM4	1	0	0
P09488	GSTM1	1	0	0
P28482	MAPK1	1	0	0
P28676	GCA	1	0	0
P29218	IMPA1	1	0	0
P29372	MPG	1	0	0
P29373	CRABP2	1	0	0
P29692	EEF1D	1	0	0
P30041	PRDX6	1	0	0
P30043	BLVRB	1	0	0
P30046	DDT	1	0	0
P30050	RPL12	1	0	0
P30085	CMPK1	1	0	0
P30086	PEBP1	1	0	0
P30101	PDIA3	1	0	0
P30419	NMT1	1	0	0
O60551	NMT2	1	0	0
P30519	HMOX2	1	0	0
P30533	LRPAP1	1	0	0
P30626	SRI	1	0	0
P30740	SERPINB1	1	0	0
P31150	GDI1	1	0	0
P31153	MAT2A	1	0	0
Q00266	MAT1A	1	0	0
P31350	RRM2	1	0	0
P31483	TIA1	1	0	0
P31689	DNAJA1	1	0	0
P31942	HNRNPH3	1	0	0
P31943	HNRNPH1	1	0	0
P31946	YWHAB	1	0	0
P31947	SFN	1	0	0
P32119	PRDX2	1	0	0
P32321	DCTD	1	0	0
P32322	PYCR1	1	0	0
P32969	RPL9	1	0	0
P33240	CSTF2	1	0	0
P34896	SHMT1	1	0	0
P35080	PFN2	1	0	0
P35219	CA8	1	0	0
P35232	PHB1	1	0	0
P35237	SERPINB6	1	0	0
P35244	RPA3	1	0	0
P35249	RFC4	1	0	0
P35250	RFC2	1	0	0
P35268	RPL22	1	0	0
P35269	GTF2F1	1	0	0
P35270	SPR	1	0	0
P35659	DEK	1	0	0
P35998	PSMC2	1	0	0
P36404	ARL2	1	0	0
P36405	ARL3	1	0	0
P36507	MAP2K2	1	0	0
P36542	ATP5F1C	1	0	0
P36543	ATP6V1E1	1	0	0
Q96A05	ATP6V1E2	1	0	0
P36578	RPL4	1	0	0
P36871	PGM1	1	0	0
P36873	PPP1CC	1	0	0
P36957	DLST	1	0	0
P37108	SRP14	1	0	0
P37802	TAGLN2	1	0	0
Q9UI15	TAGLN3	1	0	0
P37837	TALDO1	1	0	0
P37840	SNCA	1	0	0
P38117	ETFB	1	0	0
P38159	RBMX	1	0	0
Q96E39	RBMXL1	1	0	0
O75526	RBMXL2	1	0	0
P38919	EIF4A3	1	0	0
P39019	RPS19	1	0	0
P39023	RPL3	1	0	0
Q92901	RPL3L	1	0	0
P39687	ANP32A	1	0	0
O43423	ANP32C	1	0	0
P39748	FEN1	1	0	0
P40227	CCT6A	1	0	0
P40429	RPL13A	1	0	0
P40616	ARL1	1	0	0
P40925	MDH1	1	0	0
P40926	MDH2	1	0	0
P40937	RFC5	1	0	0
P40938	RFC3	1	0	0
P41091	EIF2S3	1	0	0
Q2VIR3	EIF2S3B	1	0	0
P41223	BUD31	1	0	0
P41227	NAA10	1	0	0
Q9BSU3	NAA11	1	0	0
Q6NXS1	PPP1R2B	1	0	0
P41236	PPP1R2	1	0	0
P41240	CSK	1	0	0
P41567	EIF1	1	0	0
P42025	ACTR1B	1	0	0
P42677	RPS27	1	0	0
P42765	ACAA2	1	0	0
P42771	CDKN2A	1	0	0
P42772	CDKN2B	1	0	0
P43034	PAFAH1B1	1	0	0
P43487	RANBP1	1	0	0
P43490	NAMPT	1	0	0
P43686	PSMC4	1	0	0
P45877	PPIC	1	0	0
P45880	VDAC2	1	0	0
P46108	CRK	1	0	0
P46109	CRKL	1	0	0
P46734	MAP2K3	1	0	0
P52564	MAP2K6	1	0	0
P46776	RPL27A	1	0	0
P46777	RPL5	1	0	0
P46779	RPL28	1	0	0
P46781	RPS9	1	0	0
P46782	RPS5	1	0	0
P46926	GNPDA1	1	0	0
Q8TDQ7	GNPDA2	1	0	0
P47755	CAPZA2	1	0	0
P47756	CAPZB	1	0	0
P48047	ATP5PO	1	0	0
P48444	ARCN1	1	0	0
P48507	GCLM	1	0	0
P48643	CCT5	1	0	0
P48723	HSPA13	1	0	0
P48739	PITPNB	1	0	0
P49005	POLD2	1	0	0
P49207	RPL34	1	0	0
P49366	DHPS	1	0	0
P49368	CCT3	1	0	0
P49458	SRP9	1	0	0
P49593	PPM1F	1	0	0
P49642	PRIM1	1	0	0
P49720	PSMB3	1	0	0
P49721	PSMB2	1	0	0
P49770	EIF2B2	1	0	0
P49773	HINT1	1	0	0
P49821	NDUFV1	1	0	0
P49840	GSK3A	1	0	0
P49841	GSK3B	1	0	0
P49903	SEPHS1	1	0	0
P50336	PPOX	1	0	0
P50402	EMD	1	0	0
P50453	SERPINB9	1	0	0
P50454	SERPINH1	1	0	0
P50502	ST13	1	0	0
P50552	VASP	1	0	0
P50583	NUDT2	1	0	0
P50613	CDK7	1	0	0
P50914	RPL14	1	0	0
P50991	CCT4	1	0	0
P50995	ANXA11	1	0	0
P51148	RAB5C	1	0	0
P51149	RAB7A	1	0	0
P51151	RAB9A	1	0	0
Q9NP90	RAB9B	1	0	0
P51153	RAB13	1	0	0
P20337	RAB3B	1	0	0
Q96E17	RAB3C	1	0	0
P51452	DUSP3	1	0	0
P51570	GALK1	1	0	0
P51572	BCAP31	1	0	0
P51580	TPMT	1	0	0
P48448	ALDH3B2	1	0	0
P30838	ALDH3A1	1	0	0
P43353	ALDH3B1	1	0	0
P51665	PSMD7	1	0	0
P51809	VAMP7	1	0	0
P51858	HDGF	1	0	0
P51948	MNAT1	1	0	0
P51965	UBE2E1	1	0	0
P51970	NDUFA8	1	0	0
P52298	NCBP2	1	0	0
P52434	POLR2H	1	0	0
P52565	ARHGDIA	1	0	0
P52597	HNRNPF	1	0	0
P52758	RIDA	1	0	0
P52815	MRPL12	1	0	0
P52907	CAPZA1	1	0	0
P53004	BLVRA	1	0	0
P53041	PPP5C	1	0	0
P53365	ARFIP2	1	0	0
P53367	ARFIP1	1	0	0
P53582	METAP1	1	0	0
P53701	HCCS	1	0	0
P53990	IST1	1	0	0
P53999	SUB1	1	0	0
P54577	YARS1	1	0	0
P54578	USP14	1	0	0
P54619	PRKAG1	1	0	0
P54819	AK2	1	0	0
P54920	NAPA	1	0	0
Q9H115	NAPB	1	0	0
P55010	EIF5	1	0	0
P55036	PSMD4	1	0	0
P55039	DRG2	1	0	0
P55210	CASP7	1	0	0
P55212	CASP6	1	0	0
P55263	ADK	1	0	0
P55735	SEC13	1	0	0
P55795	HNRNPH2	1	0	0
P55809	OXCT1	1	0	0
P55957	BID	1	0	0
P56134	ATP5MF	1	0	0
P56377	AP1S2	1	0	0
P56537	EIF6	1	0	0
P56545	CTBP2	1	0	0
P56556	NDUFA6	1	0	0
P57076	CFAP298	1	0	0
P57081	WDR4	1	0	0
P57105	SYNJ2BP	1	0	0
P58557	YBEY	1	0	0
Q99879	H2BC14	1	0	0
Q99877	H2BC15	1	0	0
Q93079	H2BC9	1	0	0
Q5QNW6	H2BC18	1	0	0
P62807	H2BC10	1	0	0
P58876	H2BC5	1	0	0
Q99880	H2BC13	1	0	0
P59998	ARPC4	1	0	0
P60468	SEC61B	1	0	0
P60510	PPP4C	1	0	0
P60520	GABARAPL2	1	0	0
P60660	MYL6	1	0	0
P60709	ACTB	1	0	0
Q9BYX7	POTEKP	1	0	0
P60842	EIF4A1	1	0	0
P60866	RPS20	1	0	0
P60891	PRPS1	1	0	0
P60900	PSMA6	1	0	0
P60953	CDC42	1	0	0
P17081	RHOQ	1	0	0
P60981	DSTN	1	0	0
P60983	GMFB	1	0	0
O60234	GMFG	1	0	0
P61006	RAB8A	1	0	0
P61009	SPCS3	1	0	0
P61019	RAB2A	1	0	0
P61020	RAB5B	1	0	0
P61026	RAB10	1	0	0
P61081	UBE2M	1	0	0
P61086	UBE2K	1	0	0
P61088	UBE2N	1	0	0
Q5JXB2	UBE2NL	1	0	0
P61106	RAB14	1	0	0
P61158	ACTR3	1	0	0
Q9P1U1	ACTR3B	1	0	0
P61163	ACTR1A	1	0	0
P61224	RAP1B	1	0	0
A6NIZ1	#N/A	1	0	0
P61225	RAP2B	1	0	0
P10114	RAP2A	1	0	0
P61247	RPS3A	1	0	0
P61254	RPL26	1	0	0
P61289	PSME3	1	0	0
P61313	RPL15	1	0	0
P61353	RPL27	1	0	0
P61513	RPL37A	1	0	0
A6NKH3	RPL37AP8	1	0	0
P61586	RHOA	1	0	0
P61604	HSPE1	1	0	0
P61916	NPC2	1	0	0
P61923	COPZ1	1	0	0
P61956	SUMO2	1	0	0
P61962	DCAF7	1	0	0
P61964	WDR5	1	0	0
P61981	YWHAG	1	0	0
P62070	RRAS2	1	0	0
P62081	RPS7	1	0	0
P62136	PPP1CA	1	0	0
P62140	PPP1CB	1	0	0
P62191	PSMC1	1	0	0
P62195	PSMC5	1	0	0
P62241	RPS8	1	0	0
P62244	RPS15A	1	0	0
P62258	YWHAE	1	0	0
P62263	RPS14	1	0	0
P62266	RPS23	1	0	0
P62269	RPS18	1	0	0
P62273	RPS29	1	0	0
P62277	RPS13	1	0	0
P62314	SNRPD1	1	0	0
P62316	SNRPD2	1	0	0
P62318	SNRPD3	1	0	0
P62380	TBPL1	1	0	0
P62424	RPL7A	1	0	0
P62495	ETF1	1	0	0
P62633	CNBP	1	0	0
P62699	YPEL5	1	0	0
P62701	RPS4X	1	0	0
Q8TD47	RPS4Y2	1	0	0
P22090	RPS4Y1	1	0	0
P62745	RHOB	1	0	0
P62750	RPL23A	1	0	0
P62753	RPS6	1	0	0
P62805	H4-16	1	0	0
P62820	RAB1A	1	0	0
P59190	RAB15	1	0	0
P62826	RAN	1	0	0
P62829	RPL23	1	0	0
P62841	RPS15	1	0	0
P62851	RPS25	1	0	0
P62854	RPS26	1	0	0
Q5JNZ5	RPS26P11	1	0	0
P62857	RPS28	1	0	0
P62888	RPL30	1	0	0
Q59GN2	RPL39P5	1	0	0
P62891	RPL39	1	0	0
P62899	RPL31	1	0	0
P62906	RPL10A	1	0	0
P62910	RPL32	1	0	0
P62913	RPL11	1	0	0
P62937	PPIA	1	0	0
Q9Y536	PPIAL4A	1	0	0
P0DN26	PPIAL4F	1	0	0
F5H284	PPIAL4D	1	0	0
A0A0B4J2A2	PPIAL4C	1	0	0
A0A075B759	PPIAL4E	1	0	0
P0DN37	PPIAL4G	1	0	0
P62942	FKBP1A	1	0	0
P62993	GRB2	1	0	0
P63000	RAC1	1	0	0
P15153	RAC2	1	0	0
Q15836	VAMP3	1	0	0
P63027	VAMP2	1	0	0
P63096	GNAI1	1	0	0
P63104	YWHAZ	1	0	0
P63151	PPP2R2A	1	0	0
Q66LE6	PPP2R2D	1	0	0
Q00005	PPP2R2B	1	0	0
Q9Y2T4	PPP2R2C	1	0	0
P63165	SUMO1	1	0	0
P63167	DYNLL1	1	0	0
P63172	DYNLT1	1	0	0
P63173	RPL38	1	0	0
P63220	RPS21	1	0	0
P63241	EIF5A	1	0	0
Q6IS14	EIF5AL1	1	0	0
Q9GZV4	EIF5A2	1	0	0
P63261	ACTG1	1	0	0
P63272	SUPT4H1	1	0	0
P63279	UBE2I	1	0	0
P67775	PPP2CA	1	0	0
P62714	PPP2CB	1	0	0
P67870	CSNK2B	1	0	0
P68133	ACTA1	1	0	0
P68032	ACTC1	1	0	0
P63267	ACTG2	1	0	0
P62736	ACTA2	1	0	0
P68036	UBE2L3	1	0	0
Q5VTE0	EEF1A1P5	1	0	0
P68104	EEF1A1	1	0	0
P68363	TUBA1B	1	0	0
A6NHL2	TUBAL3	1	0	0
P68366	TUBA4A	1	0	0
P68371	TUBB4B	1	0	0
P68400	CSNK2A1	1	0	0
Q8NEV1	CSNK2A3	1	0	0
P68402	PAFAH1B2	1	0	0
P68431	H3C1	1	0	0
Q16695	H3-4	1	0	0
Q6NXT2	H3-5	1	0	0
P78318	IGBP1	1	0	0
P78330	PSPH	1	0	0
P78406	RAE1	1	0	0
P78417	GSTO1	1	0	0
P78540	ARG2	1	0	0
P80217	IFI35	1	0	0
P80303	NUCB2	1	0	0
P82663	MRPS25	1	0	0
P82673	MRPS35	1	0	0
P82930	MRPS34	1	0	0
P82979	SARNP	1	0	0
P83731	RPL24	1	0	0
P83916	CBX1	1	0	0
P84077	ARF1	1	0	0
P61204	ARF3	1	0	0
P84090	ERH	1	0	0
P84098	RPL19	1	0	0
P84103	SRSF3	1	0	0
P84243	H3-3A	1	0	0
P98179	RBM3	1	0	0
P99999	CYCS	1	0	0
Q00169	PITPNA	1	0	0
Q00534	CDK6	1	0	0
Q00577	PURA	1	0	0
Q00688	FKBP3	1	0	0
Q00796	SORD	1	0	0
Q01085	TIAL1	1	0	0
Q01130	SRSF2	1	0	0
Q9BRL6	SRSF8	1	0	0
Q01469	FABP5	1	0	0
A8MUU1	FABP5P3	1	0	0
Q01518	CAP1	1	0	0
Q01581	HMGCS1	1	0	0
Q02127	DHODH	1	0	0
Q02543	RPL18A	1	0	0
Q02750	MAP2K1	1	0	0
Q02790	FKBP4	1	0	0
Q02878	RPL6	1	0	0
Q03426	MVK	1	0	0
Q04323	UBXN1	1	0	0
Q04917	YWHAH	1	0	0
Q05048	CSTF1	1	0	0
Q05639	EEF1A2	1	0	0
Q06203	PPAT	1	0	0
Q06323	PSME1	1	0	0
Q06830	PRDX1	1	0	0
Q07020	RPL18	1	0	0
Q07021	C1QBP	1	0	0
Q96K21	ZFYVE19	1	0	0
Q07812	BAX	1	0	0
Q07955	SRSF1	1	0	0
Q08257	CRYZ	1	0	0
Q08752	PPID	1	0	0
Q09028	RBBP4	1	0	0
Q0VDF9	HSPA14	1	0	0
Q10589	BST2	1	0	0
Q12765	SCRN1	1	0	0
Q12792	TWF1	1	0	0
Q12800	TFCP2	1	0	0
Q9NZI7	UBP1	1	0	0
Q12824	SMARCB1	1	0	0
Q12846	STX4	1	0	0
Q12849	GRSF1	1	0	0
Q12904	AIMP1	1	0	0
Q12905	ILF2	1	0	0
Q12972	PPP1R8	1	0	0
Q12974	PTP4A2	1	0	0
Q93096	PTP4A1	1	0	0
Q13043	STK4	1	0	0
Q13084	MRPL28	1	0	0
Q13098	GPS1	1	0	0
Q13126	MTAP	1	0	0
Q13148	TARDBP	1	0	0
Q13151	HNRNPA0	1	0	0
Q13155	AIMP2	1	0	0
Q13158	FADD	1	0	0
Q13177	PAK2	1	0	0
Q13153	PAK1	1	0	0
Q13185	CBX3	1	0	0
Q13228	SELENBP1	1	0	0
Q13242	SRSF9	1	0	0
Q13243	SRSF5	1	0	0
Q13247	SRSF6	1	0	0
Q13277	STX3	1	0	0
P0CB38	PABPC4L	1	0	0
Q13325	IFIT5	1	0	0
Q13347	EIF3I	1	0	0
Q13363	CTBP1	1	0	0
Q13442	PDAP1	1	0	0
Q13451	FKBP5	1	0	0
Q13509	TUBB3	1	0	0
Q13526	PIN1	1	0	0
O15428	PIN1P1	1	0	0
Q13547	HDAC1	1	0	0
Q13561	DCTN2	1	0	0
Q13564	NAE1	1	0	0
Q13630	GFUS	1	0	0
Q13685	AAMP	1	0	0
Q13838	DDX39B	1	0	0
Q13868	EXOSC2	1	0	0
Q13895	BYSL	1	0	0
Q13951	CBFB	1	0	0
Q14019	COTL1	1	0	0
Q14103	HNRNPD	1	0	0
Q14141	SEPTIN6	1	0	0
Q14165	MLEC	1	0	0
Q14232	EIF2B1	1	0	0
Q14240	EIF4A2	1	0	0
Q14254	FLOT2	1	0	0
Q14318	FKBP8	1	0	0
Q14320	FAM50A	1	0	0
Q9Y247	FAM50B	1	0	0
Q14554	PDIA5	1	0	0
Q14558	PRPSAP1	1	0	0
Q14657	LAGE3	1	0	0
Q14691	GINS1	1	0	0
Q14696	MESD	1	0	0
Q14919	DRAP1	1	0	0
Q15005	SPCS2	1	0	0
Q15006	EMC2	1	0	0
Q15008	PSMD6	1	0	0
Q15018	ABRAXAS2	1	0	0
Q15019	SEPTIN2	1	0	0
Q15024	EXOSC7	1	0	0
Q15056	EIF4H	1	0	0
Q15084	PDIA6	1	0	0
Q15102	PAFAH1B3	1	0	0
Q15126	PMVK	1	0	0
Q15165	PON2	1	0	0
Q15181	PPA1	1	0	0
Q15185	PTGES3	1	0	0
Q15233	NONO	1	0	0
Q15257	PTPA	1	0	0
Q15274	QPRT	1	0	0
Q15286	RAB35	1	0	0
Q15771	RAB30	1	0	0
Q15363	TMED2	1	0	0
Q15365	PCBP1	1	0	0
Q15370	ELOB	1	0	0
Q15427	SF3B4	1	0	0
Q15435	PPP1R7	1	0	0
Q15554	TERF2	1	0	0
Q15555	MAPRE2	1	0	0
Q9UPY8	MAPRE3	1	0	0
Q15631	TSN	1	0	0
Q15645	TRIP13	1	0	0
Q15654	TRIP6	1	0	0
Q15691	MAPRE1	1	0	0
Q15717	ELAVL1	1	0	0
Q15750	TAB1	1	0	0
Q15785	TOMM34	1	0	0
Q15907	RAB11B	1	0	0
P62491	RAB11A	1	0	0
P57735	RAB25	1	0	0
Q16181	SEPTIN7	1	0	0
Q6ZU15	SEPTIN14	1	0	0
Q16186	ADRM1	1	0	0
Q16222	UAP1	1	0	0
Q16342	PDCD2	1	0	0
Q16352	INA	1	0	0
Q16527	CSRP2	1	0	0
Q16540	MRPL23	1	0	0
Q16543	CDC37	1	0	0
Q16576	RBBP7	1	0	0
Q16630	CPSF6	1	0	0
Q16637	SMN1	1	0	0
Q16644	MAPKAPK3	1	0	0
Q16718	NDUFA5	1	0	0
Q16762	TST	1	0	0
Q16763	UBE2S	1	0	0
Q16774	GUK1	1	0	0
Q16836	HADH	1	0	0
Q16864	ATP6V1F	1	0	0
Q2TAA2	IAH1	1	0	0
Q3LXA3	TKFC	1	0	0
Q3MHD2	LSM12	1	0	0
Q3SXM5	HSDL1	1	0	0
Q3ZAQ7	VMA21	1	0	0
Q3ZCM7	TUBB8	1	0	0
Q3ZCQ8	TIMM50	1	0	0
Q3ZCW2	LGALSL	1	0	0
Q49AR2	C5orf22	1	0	0
Q52LJ0	FAM98B	1	0	0
Q53EL6	PDCD4	1	0	0
Q53H12	AGK	1	0	0
Q53H96	PYCR3	1	0	0
Q562R1	ACTBL2	1	0	0
Q5EBL4	RILPL1	1	0	0
Q5HYI8	RABL3	1	0	0
Q5J8M3	EMC4	1	0	0
Q5RI15	COX20	1	0	0
Q5RKV6	EXOSC6	1	0	0
Q9Y6H1	CHCHD2	1	0	0
Q5T1J5	CHCHD2P9	1	0	0
Q5T440	IBA57	1	0	0
Q5TBB1	RNASEH2B	1	0	0
Q5TDH0	DDI2	1	0	0
Q8WTU0	DDI1	1	0	0
Q5UCC4	EMC10	1	0	0
Q5VT66	MTARC1	1	0	0
Q5VW32	BROX	1	0	0
Q5VWZ2	LYPLAL1	1	0	0
Q5W111	SPRYD7	1	0	0
Q68CQ7	GLT8D1	1	0	0
Q69YN2	CWF19L1	1	0	0
Q6DKI1	RPL7L1	1	0	0
Q6DKJ4	NXN	1	0	0
Q6GMV2	SMYD5	1	0	0
Q6I9Y2	THOC7	1	0	0
Q6IAA8	LAMTOR1	1	0	0
Q6IBS0	TWF2	1	0	0
Q6NW29	RWDD4	1	0	0
Q6NYC1	JMJD6	1	0	0
Q6P1L8	MRPL14	1	0	0
Q6P4A7	SFXN4	1	0	0
Q6P587	FAHD1	1	0	0
Q6P9B6	MEAK7	1	0	0
Q6PIU2	NCEH1	1	0	0
Q6RFH5	WDR74	1	0	0
Q6UX04	CWC27	1	0	0
Q6UXN9	WDR82	1	0	0
Q6YN16	HSDL2	1	0	0
Q6ZN17	LIN28B	1	0	0
Q70Z53	FRA10AC1	1	0	0
Q71DI3	H3C13	1	0	0
Q71U36	TUBA1A	1	0	0
Q6PEY2	TUBA3E	1	0	0
Q7L1Q6	BZW1	1	0	0
Q7L2H7	EIF3M	1	0	0
Q7L5N1	COPS6	1	0	0
Q7L5Y9	MAEA	1	0	0
Q7Z3B4	NUP54	1	0	0
Q7Z4H8	POGLUT3	1	0	0
Q7Z4W1	DCXR	1	0	0
Q7Z7E8	UBE2Q1	1	0	0
Q7Z7H5	TMED4	1	0	0
Q86TX2	ACOT1	1	0	0
Q86V81	ALYREF	1	0	0
Q86VN1	VPS36	1	0	0
Q86W42	THOC6	1	0	0
Q86Y82	STX12	1	0	0
Q86YB8	ERO1B	1	0	0
Q8IUF8	RIOX2	1	0	0
Q8IUI8	CRLF3	1	0	0
Q8IVD9	NUDCD3	1	0	0
Q8IVS2	MCAT	1	0	0
Q8IXM3	MRPL41	1	0	0
Q8IYS1	PM20D2	1	0	0
Q8N0U8	VKORC1L1	1	0	0
Q8N183	NDUFAF2	1	0	0
Q8N335	GPD1L	1	0	0
Q8N4P3	HDDC3	1	0	0
Q8N4V1	MMGT1	1	0	0
Q8N5K1	CISD2	1	0	0
Q8N5M4	TTC9C	1	0	0
Q8N5M9	JAGN1	1	0	0
Q8N684	CPSF7	1	0	0
Q8N6T3	ARFGAP1	1	0	0
Q8N9N8	EIF1AD	1	0	0
Q8NAV1	PRPF38A	1	0	0
Q8NB37	GATD1	1	0	0
Q8NBJ7	SUMF2	1	0	0
Q8NBM8	PCYOX1L	1	0	0
Q8NBN7	RDH13	1	0	0
Q8NBQ5	HSD17B11	1	0	0
Q8NBS9	TXNDC5	1	0	0
Q8NBT2	SPC24	1	0	0
Q8NBU5	ATAD1	1	0	0
Q8NC51	SERBP1	1	0	0
Q8NCA5	FAM98A	1	0	0
Q8ND56	LSM14A	1	0	0
Q8NFH3	NUP43	1	0	0
Q8NFH4	NUP37	1	0	0
Q8NFH5	NUP35	1	0	0
Q8NFI4	ST13P5	1	0	0
Q8NFW8	CMAS	1	0	0
Q8TAE8	GADD45GIP1	1	0	0
Q8TB03	CXorf38	1	0	0
Q8TBX8	PIP4K2C	1	0	0
Q8TCC3	MRPL30	1	0	0
Q8TCF1	ZFAND1	1	0	0
P24298	GPT	1	0	0
Q8TDP1	RNASEH2C	1	0	0
Q8TEA8	DTD1	1	0	0
Q8TED0	UTP15	1	0	0
Q8TED1	GPX8	1	0	0
Q8WTS6	SETD7	1	0	0
Q8WUA2	PPIL4	1	0	0
Q8WUD1	RAB2B	1	0	0
Q8WUD4	CCDC12	1	0	0
Q8WUH6	TMEM263	1	0	0
Q8WUK0	PTPMT1	1	0	0
Q8WUX2	CHAC2	1	0	0
Q8WVD3	RNF138	1	0	0
Q8WVM0	TFB1M	1	0	0
Q8WVY7	UBLCP1	1	0	0
Q8WW12	PCNP	1	0	0
Q8WW59	SPRYD4	1	0	0
Q8WXF1	PSPC1	1	0	0
Q8WXX5	DNAJC9	1	0	0
Q8WZA0	LZIC	1	0	0
Q92520	FAM3C	1	0	0
Q92530	PSMF1	1	0	0
Q92572	AP3S1	1	0	0
Q92597	NDRG1	1	0	0
Q92643	PIGK	1	0	0
Q92688	ANP32B	1	0	0
Q92734	TFG	1	0	0
Q92769	HDAC2	1	0	0
Q92820	GGH	1	0	0
Q92879	CELF1	1	0	0
Q92890	UFD1	1	0	0
Q92905	COPS5	1	0	0
Q92917	GPKOW	1	0	0
Q92930	RAB8B	1	0	0
Q92979	EMG1	1	0	0
Q969G3	SMARCE1	1	0	0
Q969J3	BORCS5	1	0	0
Q969Q0	RPL36AL	1	0	0
P83881	RPL36A	1	0	0
Q969Q5	RAB24	1	0	0
Q969T9	WBP2	1	0	0
Q969U7	PSMG2	1	0	0
Q96A26	FAM162A	1	0	0
Q96A33	CCDC47	1	0	0
Q96A49	SYAP1	1	0	0
Q96A72	MAGOHB	1	0	0
Q96AG4	LRRC59	1	0	0
Q96AT9	RPE	1	0	0
Q2QD12	RPEL1	1	0	0
Q96AZ6	ISG20	1	0	0
Q96B26	EXOSC8	1	0	0
Q96BM9	ARL8A	1	0	0
Q96BW5	PTER	1	0	0
Q96C19	EFHD2	1	0	0
Q96C23	GALM	1	0	0
Q96C36	PYCR2	1	0	0
Q96C86	DCPS	1	0	0
Q96CN7	ISOC1	1	0	0
Q96CS3	FAF2	1	0	0
Q96CT7	CCDC124	1	0	0
Q96CW1	AP2M1	1	0	0
Q96CX2	KCTD12	1	0	0
Q96D46	NMD3	1	0	0
Q96DA6	DNAJC19	1	0	0
Q96DE0	NUDT16	1	0	0
Q96DG6	CMBL	1	0	0
Q96DI7	SNRNP40	1	0	0
Q96EE3	SEH1L	1	0	0
Q96EK6	GNPNAT1	1	0	0
Q96EL3	MRPL53	1	0	0
Q96EP5	DAZAP1	1	0	0
Q96ES7	SGF29	1	0	0
Q96EY8	MMAB	1	0	0
Q96F86	EDC3	1	0	0
Q96FW1	OTUB1	1	0	0
Q96FZ2	HMCES	1	0	0
Q96G21	IMP4	1	0	0
Q96GD0	PDXP	1	0	0
Q96GD4	AURKB	1	0	0
Q9UQB9	AURKC	1	0	0
Q96H79	ZC3HAV1L	1	0	0
Q96HE7	ERO1A	1	0	0
Q96HY6	DDRGK1	1	0	0
Q96I24	FUBP3	1	0	0
Q96I25	RBM17	1	0	0
Q96IU4	ABHD14B	1	0	0
Q96IZ0	PAWR	1	0	0
Q96J01	THOC3	1	0	0
Q96JB5	CDK5RAP3	1	0	0
Q96K17	BTF3L4	1	0	0
Q96KP4	CNDP2	1	0	0
Q96M27	PRRC1	1	0	0
Q96MG7	NSMCE3	1	0	0
Q96MW1	CCDC43	1	0	0
Q96MX6	DNAAF10	1	0	0
Q96P16	RPRD1A	1	0	0
Q96PU8	QKI	1	0	0
Q96QR8	PURB	1	0	0
Q96S44	TP53RK	1	0	0
Q96SY0	INTS14	1	0	0
Q99426	TBCB	1	0	0
Q99436	PSMB7	1	0	0
Q99442	SEC62	1	0	0
Q99471	PFDN5	1	0	0
Q99496	RNF2	1	0	0
Q99497	PARK7	1	0	0
Q99536	VAT1	1	0	0
Q99541	PLIN2	1	0	0
Q99598	TSNAX	1	0	0
Q99611	SEPHS2	1	0	0
Q99614	TTC1	1	0	0
Q99615	DNAJC7	1	0	0
Q99623	PHB2	1	0	0
Q99627	COPS8	1	0	0
Q99653	CHP1	1	0	0
Q99714	HSD17B10	1	0	0
Q99720	SIGMAR1	1	0	0
Q99729	HNRNPAB	1	0	0
Q99747	NAPG	1	0	0
Q99816	TSG101	1	0	0
Q99829	CPNE1	1	0	0
Q99873	PRMT1	1	0	0
Q99942	RNF5	1	0	0
Q99956	DUSP9	1	0	0
Q99961	SH3GL1	1	0	0
Q99962	SH3GL2	1	0	0
Q99986	VRK1	1	0	0
Q9BPX5	ARPC5L	1	0	0
Q9BQ61	TRIR	1	0	0
Q9BQ67	GRWD1	1	0	0
Q9BQ75	CMSS1	1	0	0
Q9BQA1	WDR77	1	0	0
Q9BQC6	MRPL57	1	0	0
Q9BQE3	TUBA1C	1	0	0
Q9BQE5	APOL2	1	0	0
Q9BR76	CORO1B	1	0	0
Q9BRA2	TXNDC17	1	0	0
Q9BRG1	VPS25	1	0	0
Q9BRJ6	C7orf50	1	0	0
Q9BRJ7	NUDT16L1	1	0	0
Q9BRP1	PDCD2L	1	0	0
Q9BRP4	PAAF1	1	0	0
Q9BRQ6	CHCHD6	1	0	0
Q9BRT9	GINS4	1	0	0
Q9BRX2	PELO	1	0	0
Q9BRX5	GINS3	1	0	0
Q9BRX8	PRXL2A	1	0	0
Q9BS26	ERP44	1	0	0
Q9BSD7	NTPCR	1	0	0
Q9BSF4	TIMM29	1	0	0
Q9BSH5	HDHD3	1	0	0
Q9BSV6	TSEN34	1	0	0
Q9BT73	PSMG3	1	0	0
Q9BTE1	DCTN5	1	0	0
Q9BTE7	DCUN1D5	1	0	0
Q9BTT0	ANP32E	1	0	0
Q9BTY7	HGH1	1	0	0
Q9BTZ2	DHRS4	1	0	0
Q6PKH6	DHRS4L2	1	0	0
P0CG22	DHRS4L1	1	0	0
Q9BU89	DOHH	1	0	0
Q9BUF5	TUBB6	1	0	0
Q9BUH6	PAXX	1	0	0
Q9BUL8	PDCD10	1	0	0
Q9BUT1	BDH2	1	0	0
Q9BV19	C1orf50	1	0	0
Q9BV20	MRI1	1	0	0
Q9BV86	NTMT1	1	0	0
Q9BVA1	TUBB2B	1	0	0
Q9BVC4	MLST8	1	0	0
Q9BVI4	NOC4L	1	0	0
Q9BVK6	TMED9	1	0	0
Q9BVM2	DPCD	1	0	0
Q9BVS5	TRMT61B	1	0	0
Q9BW83	IFT27	1	0	0
Q9BW91	NUDT9	1	0	0
Q9BWF3	RBM4	1	0	0
Q9BWH2	FUNDC2	1	0	0
Q9BXS5	AP1M1	1	0	0
Q9Y6Q5	AP1M2	1	0	0
Q9BXY0	MAK16	1	0	0
Q9BY32	ITPA	1	0	0
Q9BY42	RTF2	1	0	0
Q9BYC9	MRPL20	1	0	0
Q9BYD1	MRPL13	1	0	0
Q9BYD3	MRPL4	1	0	0
Q9BYG3	NIFK	1	0	0
Q9BYN8	MRPS26	1	0	0
Q9BZK7	TBL1XR1	1	0	0
Q9BZX2	UCK2	1	0	0
Q9BZZ5	API5	1	0	0
Q9C0B1	FTO	1	0	0
Q9GZL7	WDR12	1	0	0
Q9GZM8	NDEL1	1	0	0
Q9NXR1	NDE1	1	0	0
Q9GZN8	C20orf27	1	0	0
Q9GZS3	WDR61	1	0	0
Q9GZT3	SLIRP	1	0	0
Q9GZT4	SRR	1	0	0
Q9GZZ1	NAA50	1	0	0
Q9GZZ9	UBA5	1	0	0
Q9H000	MKRN2	1	0	0
Q9H061	TMEM126A	1	0	0
Q9H074	PAIP1	1	0	0
Q9H0C8	ILKAP	1	0	0
Q9H0E2	TOLLIP	1	0	0
Q9H0R4	HDHD2	1	0	0
Q9H0S4	DDX47	1	0	0
Q9H0U4	RAB1B	1	0	0
Q92928	RAB1C	1	0	0
Q9H0U6	MRPL18	1	0	0
Q9H0W9	C11orf54	1	0	0
Q9H223	EHD4	1	0	0
Q9H3K6	BOLA2	1	0	0
Q9H3N1	TMX1	1	0	0
Q9H3R5	CENPH	1	0	0
Q9H444	CHMP4B	1	0	0
Q9H488	POFUT1	1	0	0
Q9H4A6	GOLPH3	1	0	0
Q9H4M9	EHD1	1	0	0
Q9NZN3	EHD3	1	0	0
Q9NZN4	EHD2	1	0	0
Q9H6Y2	WDR55	1	0	0
Q9H773	DCTPP1	1	0	0
Q9H7B2	RPF2	1	0	0
Q9H7C9	AAMDC	1	0	0
Q9H832	UBE2Z	1	0	0
Q9H8H3	METTL7A	1	0	0
Q9H8S9	MOB1A	1	0	0
Q9H8Y8	GORASP2	1	0	0
Q9H974	QTRT2	1	0	0
Q9H9Q2	COPS7B	1	0	0
Q9HAB8	PPCS	1	0	0
Q9HAV7	GRPEL1	1	0	0
Q9HB07	MYG1	1	0	0
Q9HB71	CACYBP	1	0	0
Q9HBH5	RDH14	1	0	0
Q9HBM1	SPC25	1	0	0
Q9HC38	GLOD4	1	0	0
Q9HCN4	GPN1	1	0	0
Q9HCN8	SDF2L1	1	0	0
Q9HCU5	PREB	1	0	0
Q9HDC9	APMAP	1	0	0
Q9NP72	RAB18	1	0	0
Q9NP79	VTA1	1	0	0
Q9NP92	MRPS30	1	0	0
Q9NPD3	EXOSC4	1	0	0
Q9NPD8	UBE2T	1	0	0
Q9NPF4	OSGEP	1	0	0
Q9NPJ6	MED4	1	0	0
Q9NPQ8	RIC8A	1	0	0
Q9NVN3	RIC8B	1	0	0
Q9NQ48	LZTFL1	1	0	0
Q9NQ88	TIGAR	1	0	0
Q9NQR4	NIT2	1	0	0
Q9NQT4	EXOSC5	1	0	0
Q9NQT5	EXOSC3	1	0	0
Q9NR31	SAR1A	1	0	0
Q9NR45	NANS	1	0	0
Q9NR46	SH3GLB2	1	0	0
Q9NR50	EIF2B3	1	0	0
Q9NR56	MBNL1	1	0	0
Q5VZF2	MBNL2	1	0	0
Q9NUK0	MBNL3	1	0	0
Q9NRF9	POLE3	1	0	0
Q9NRG0	CHRAC1	1	0	0
Q9NRG7	SDR39U1	1	0	0
Q9NRG9	AAAS	1	0	0
Q9NRN7	AASDHPPT	1	0	0
Q9NRV9	HEBP1	1	0	0
Q9NRW3	APOBEC3C	1	0	0
Q9NRX2	MRPL17	1	0	0
Q9NRX4	PHPT1	1	0	0
Q9NS69	TOMM22	1	0	0
Q9NT62	ATG3	1	0	0
Q9NTK5	OLA1	1	0	0
Q9NTM9	CUTC	1	0	0
Q9NTX5	ECHDC1	1	0	0
Q9NUG6	PDRG1	1	0	0
Q9NUP9	LIN7C	1	0	0
Q9NUU7	DDX19A	1	0	0
Q9UHL0	DDX25	1	0	0
Q9NV31	IMP3	1	0	0
Q9NV56	MRGBP	1	0	0
Q9NVA2	SEPTIN11	1	0	0
Q9NVJ2	ARL8B	1	0	0
Q9NVT9	ARMC1	1	0	0
Q9NW64	RBM22	1	0	0
Q9NWS0	PIH1D1	1	0	0
Q9NWV4	CZIB	1	0	0
Q9NWY4	HPF1	1	0	0
A8MVJ9	#N/A	1	0	0
Q9NX08	COMMD8	1	0	0
Q9NX24	NHP2	1	0	0
Q9NX40	OCIAD1	1	0	0
Q9NX63	CHCHD3	1	0	0
Q9NXG2	THUMPD1	1	0	0
Q9NXR7	BABAM2	1	0	0
Q9NXS2	QPCTL	1	0	0
Q9NXV2	KCTD5	1	0	0
Q9NY12	GAR1	1	0	0
Q9NYK5	MRPL39	1	0	0
Q9NYL9	TMOD3	1	0	0
Q9NYR9	NKIRAS2	1	0	0
Q9NZ45	CISD1	1	0	0
Q9NZL4	HSPBP1	1	0	0
Q9NZL9	MAT2B	1	0	0
Q9NZZ3	CHMP5	1	0	0
Q9P000	COMMD9	1	0	0
Q9P015	MRPL15	1	0	0
Q9P016	THYN1	1	0	0
Q9P032	NDUFAF4	1	0	0
Q9P0I2	EMC3	1	0	0
Q9P0L0	VAPA	1	0	0
Q9P0M6	MACROH2A2	1	0	0
Q9P1F3	ABRACL	1	0	0
Q9P258	RCC2	1	0	0
Q9P289	STK26	1	0	0
O00506	STK25	1	0	0
Q9P2T1	GMPR2	1	0	0
P36959	GMPR	1	0	0
Q9P2W1	PSMC3IP	1	0	0
Q9P2X0	DPM3	1	0	0
Q9UBE0	SAE1	1	0	0
Q9UBI1	COMMD3	1	0	0
Q9UBI6	GNG12	1	0	0
Q9UBP6	METTL1	1	0	0
Q9UBQ0	VPS29	1	0	0
Q9UBQ5	EIF3K	1	0	0
Q9UBQ7	GRHPR	1	0	0
Q9UBS4	DNAJB11	1	0	0
Q9UBW8	COPS7A	1	0	0
Q9UDW1	UQCR10	1	0	0
Q9UDX5	MTFP1	1	0	0
Q9UDY4	DNAJB4	1	0	0
Q9UET6	FTSJ1	1	0	0
Q9UEW8	STK39	1	0	0
Q9UGI8	TES	1	0	0
Q9UGV2	NDRG3	1	0	0
Q9UH62	ARMCX3	1	0	0
Q9UHA4	LAMTOR3	1	0	0
Q9UHD1	CHORDC1	1	0	0
Q9UHV9	PFDN2	1	0	0
Q9UHX1	PUF60	1	0	0
Q9UHY7	ENOPH1	1	0	0
Q9UI09	NDUFA12	1	0	0
Q9UI30	TRMT112	1	0	0
Q9UIC8	LCMT1	1	0	0
Q9UIJ7	AK3	1	0	0
Q9UJ70	NAGK	1	0	0
Q9UJA5	TRMT6	1	0	0
Q9UJK0	TSR3	1	0	0
Q9UJW0	DCTN4	1	0	0
Q9UJZ1	STOML2	1	0	0
Q9UKD2	MRTO4	1	0	0
Q9UKK9	NUDT5	1	0	0
Q9UKL0	RCOR1	1	0	0
Q9UKM9	RALY	1	0	0
Q9UKS6	PACSIN3	1	0	0
Q9UKX7	NUP50	1	0	0
Q9UKY7	CDV3	1	0	0
Q9UL15	BAG5	1	0	0
Q9UL25	RAB21	1	0	0
Q9UL40	ZNF346	1	0	0
Q9UL46	PSME2	1	0	0
Q9ULC4	MCTS1	1	0	0
Q9ULR0	ISY1	1	0	0
Q9ULV4	CORO1C	1	0	0
Q9UMS0	NFU1	1	0	0
Q9UMS4	PRPF19	1	0	0
Q9UMY4	SNX12	1	0	0
Q9UN37	VPS4A	1	0	0
Q9UNE7	STUB1	1	0	0
Q9UNF0	PACSIN2	1	0	0
Q9UNH7	SNX6	1	0	0
Q9UNI6	DUSP12	1	0	0
Q9UNK0	STX8	1	0	0
Q9UNL2	SSR3	1	0	0
Q9UNM6	PSMD13	1	0	0
Q9UNN8	PROCR	1	0	0
Q9UNQ2	DIMT1	1	0	0
Q9UNX3	RPL26L1	1	0	0
Q9UNZ2	NSFL1C	1	0	0
Q9UQ80	PA2G4	1	0	0
Q9Y221	NIP7	1	0	0
Q9Y224	RTRAF	1	0	0
Q9Y230	RUVBL2	1	0	0
Q9Y237	PIN4	1	0	0
Q9Y265	RUVBL1	1	0	0
Q9Y266	NUDC	1	0	0
Q9Y277	VDAC3	1	0	0
Q9Y281	CFL2	1	0	0
Q9Y282	ERGIC3	1	0	0
Q9Y285	FARSA	1	0	0
Q9Y291	MRPS33	1	0	0
Q9Y295	DRG1	1	0	0
Q9Y2B0	CNPY2	1	0	0
Q9Y2C4	EXOG	1	0	0
Q9Y2P8	RCL1	1	0	0
Q9Y2Q3	GSTK1	1	0	0
Q9Y2R5	MRPS17	1	0	0
Q9Y2R9	MRPS7	1	0	0
Q9Y2T2	AP3M1	1	0	0
P53677	AP3M2	1	0	0
Q9Y2Z0	SUGT1	1	0	0
Q9Y305	ACOT9	1	0	0
Q9Y314	NOSIP	1	0	0
Q9Y315	DERA	1	0	0
Q9Y333	LSM2	1	0	0
Q9Y371	SH3GLB1	1	0	0
Q9Y383	LUC7L2	1	0	0
Q9Y394	DHRS7	1	0	0
Q9Y3A5	SBDS	1	0	0
Q9Y3B2	EXOSC1	1	0	0
Q9Y3B4	SF3B6	1	0	0
Q9Y3B7	MRPL11	1	0	0
Q9Y3B8	REXO2	1	0	0
Q9Y3C4	TPRKB	1	0	0
Q9Y3C6	PPIL1	1	0	0
Q9Y3C8	UFC1	1	0	0
Q9Y3D0	CIAO2B	1	0	0
Q9Y3D3	MRPS16	1	0	0
Q9Y3D6	FIS1	1	0	0
Q9Y3D8	AK6	1	0	0
Q9Y3D9	MRPS23	1	0	0
Q9Y3E5	PTRH2	1	0	0
Q9Y3F4	STRAP	1	0	0
Q9Y3I0	RTCB	1	0	0
Q9Y3U8	RPL36	1	0	0
Q9Y3Y2	CHTOP	1	0	0
Q9Y4P1	ATG4B	1	0	0
Q9Y4Z0	LSM4	1	0	0
Q9Y508	RNF114	1	0	0
Q9Y512	SAMM50	1	0	0
Q9Y530	OARD1	1	0	0
Q9Y570	PPME1	1	0	0
Q9Y5K5	UCHL5	1	0	0
Q9Y5K8	ATP6V1D	1	0	0
Q9Y5M8	SRPRB	1	0	0
Q9Y5P6	GMPPB	1	0	0
Q9Y5Q8	GTF3C5	1	0	0
Q9Y5S9	RBM8A	1	0	0
Q9Y5X3	SNX5	1	0	0
Q9Y5Y2	NUBP2	1	0	0
Q9Y617	PSAT1	1	0	0
Q9Y624	F11R	1	0	0
Q9Y676	MRPS18B	1	0	0
Q9Y696	CLIC4	1	0	0
O15247	CLIC2	1	0	0
Q9Y6A4	CFAP20	1	0	0
Q9Y6B6	SAR1B	1	0	0
Q9Y6C9	MTCH2	1	0	0
Q9Y6E0	STK24	1	0	0
Q9Y6E2	BZW2	1	0	0
Q9Y6G9	DYNC1LI1	1	0	0
	#N/A
	#N/A
	#N/A
	#N/A
	#N/A
	#N/A
	#N/A
	#N/A
	#N/A
	#N/A
	#N/A
	#N/A
	#N/A
	#N/A
	#N/A
	#N/A
	#N/A
	#N/A
	#N/A
	#N/A
	#N/A
	#N/A
	#N/A
	#N/A
	#N/A
	#N/A
	#N/A
	#N/A
	#N/A
	#N/A
	#N/A
	#N/A
	#N/A
	#N/A
	#N/A
	#N/A
	#N/A
	#N/A
	#N/A
	#N/A
	#N/A
	#N/A
	#N/A
	#N/A
	#N/A
	#N/A
	#N/A
	#N/A
	#N/A
	#N/A
	#N/A
	#N/A
	#N/A
	#N/A
	#N/A
	#N/A
	#N/A
	#N/A
	#N/A
	#N/A
	#N/A
	#N/A
	#N/A
	#N/A
	#N/A
	#N/A
	#N/A
	#N/A
	#N/A
	#N/A
	#N/A
	#N/A
	#N/A
	#N/A
	#N/A
	#N/A
	#N/A
	#N/A
	#N/A
	#N/A
	#N/A
	#N/A
	#N/A
	#N/A
	#N/A
	#N/A
	#N/A
	#N/A
	#N/A
	#N/A
	#N/A
	#N/A
	#N/A
	#N/A
	#N/A
	#N/A
	#N/A
	#N/A
	#N/A
	#N/A
	#N/A
	#N/A
	#N/A
	#N/A
	#N/A
	#N/A
	#N/A
	#N/A
	#N/A
	#N/A
	#N/A
	#N/A
	#N/A
	#N/A
	#N/A
	#N/A
	#N/A
	#N/A
	#N/A
	#N/A
	#N/A
	#N/A
	#N/A
	#N/A
	#N/A
	#N/A
	#N/A
	#N/A
	#N/A
	#N/A
	#N/A
	#N/A
	#N/A
	#N/A
	#N/A
	#N/A
	#N/A
	#N/A
	#N/A
	#N/A
	#N/A
	#N/A
	#N/A
	#N/A
	#N/A
	#N/A
	#N/A
	#N/A
	#N/A
	#N/A
	#N/A
	#N/A
	#N/A
	#N/A
	#N/A
	#N/A
	#N/A
	#N/A
	#N/A
	#N/A
	#N/A
	#N/A
	#N/A
	#N/A
	#N/A
	#N/A
	#N/A
	#N/A
	#N/A
	#N/A
	#N/A
	#N/A
	#N/A
	#N/A
	#N/A
	#N/A
	#N/A
	#N/A
	#N/A
	#N/A
	#N/A
	#N/A
	#N/A
	#N/A
	#N/A
	#N/A
	#N/A
	#N/A
	#N/A
	#N/A
	#N/A
	#N/A
	#N/A
	#N/A
	#N/A
	#N/A
	#N/A
	#N/A
	#N/A
	#N/A
	#N/A
	#N/A
	#N/A
	#N/A
	#N/A
	#N/A
	#N/A
	#N/A
	#N/A
	#N/A
	#N/A
	#N/A
	#N/A
	#N/A
	#N/A
	#N/A
	#N/A
	#N/A
	#N/A
	#N/A
	#N/A
	#N/A
	#N/A
	#N/A
	#N/A
	#N/A
	#N/A
	#N/A
	#N/A
	#N/A
	#N/A
	#N/A
	#N/A
	#N/A
	#N/A
	#N/A
	#N/A
	#N/A
	#N/A
	#N/A
	#N/A
	#N/A
	#N/A
	#N/A
	#N/A
	#N/A
	#N/A
	#N/A
	#N/A
	#N/A
	#N/A
	#N/A
	#N/A
	#N/A
	#N/A
	#N/A
	#N/A
	#N/A
	#N/A
	#N/A
	#N/A
	#N/A
	#N/A
	#N/A
	#N/A
	#N/A
	#N/A
	#N/A
	#N/A
	#N/A
	#N/A
	#N/A
	#N/A
	#N/A
	#N/A
	#N/A
	#N/A
	#N/A
	#N/A
	#N/A
	#N/A
	#N/A
	#N/A
	#N/A
	#N/A
	#N/A
	#N/A
	#N/A
	#N/A
	#N/A
	#N/A
	#N/A
	#N/A
	#N/A
	#N/A
	#N/A
	#N/A
	#N/A
	#N/A
	#N/A
	#N/A
	#N/A
	#N/A
	#N/A
	#N/A
	#N/A
	#N/A
	#N/A
	#N/A
	#N/A
	#N/A
	#N/A
	#N/A
	#N/A
	#N/A
	#N/A
	#N/A
	#N/A
	#N/A
	#N/A
	#N/A
	#N/A
	#N/A
	#N/A
	#N/A
	#N/A
	#N/A
	#N/A
	#N/A
	#N/A
	#N/A
	#N/A
	#N/A
	#N/A
	#N/A
	#N/A
	#N/A
	#N/A
	#N/A
	#N/A
	#N/A
	#N/A
	#N/A
	#N/A
	#N/A
	#N/A
	#N/A
	#N/A
	#N/A
	#N/A
	#N/A
	#N/A
	#N/A
	#N/A
	#N/A
	#N/A
	#N/A
	#N/A
	#N/A
	#N/A
	#N/A
	#N/A
	#N/A
	#N/A
	#N/A
	#N/A
	#N/A
	#N/A
	#N/A
	#N/A
	#N/A
	#N/A
	#N/A
	#N/A
	#N/A
	#N/A
	#N/A
	#N/A
	#N/A
	#N/A
	#N/A
	#N/A
	#N/A
	#N/A
	#N/A
	#N/A
	#N/A
	#N/A
	#N/A
	#N/A
	#N/A
	#N/A
	#N/A
	#N/A
	#N/A
	#N/A
	#N/A
	#N/A
	#N/A
	#N/A
	#N/A
	#N/A
	#N/A
	#N/A
	#N/A
	#N/A
	#N/A
	#N/A
	#N/A
	#N/A
	#N/A
	#N/A
	#N/A
	#N/A
	#N/A
	#N/A
	#N/A
	#N/A
	#N/A
	#N/A
	#N/A
[truncated: 226 more rows]

## Sheet: 5
Uniprot #	Gene name	Unmodified	Monomodified
O95394	PGM3	0.137355	0.862645
P0CB38	PABPC4L	0.163968	0.836032
P04637	TP53	0.165433	0.834567
P54709	ATP1B3	0.255704	0.744296
P67809	YBX1	0.29019	0.70981
P55209	NAP1L1	0.296565	0.703435
P61978	HNRNPK	0.309426	0.690574
P57721	PCBP3	0.367962	0.632038
Q15427	SF3B4	0.373382	0.626618
Q9HAU6	TPT1P8	0.406593	0.593407
Q56UQ5	#N/A	0.406593	0.593407
O14530	TXNDC9	0.428	0.572
Q99733	NAP1L4	0.428637	0.571363
P27797	CALR	0.442009	0.557991
Q9UHX1	PUF60	0.445438	0.554562
P31153	MAT2A	0.454631	0.545369
Q00266	MAT1A	0.454631	0.545369
Q96HS1	PGAM5	0.467765	0.532235
P62266	RPS23	0.487725	0.512275
P62750	RPL23A	0.488475	0.511525
Q15366	PCBP2	0.496179	0.503821
P12429	ANXA3	0.5	0.5
Q9H488	POFUT1	0.5	0.5
P18031	PTPN1	0.503073	0.496927
Q8NEG2	C7orf57	0.514107	0.485893
Q8WXF1	PSPC1	0.53602	0.46398
P47914	RPL29	0.547386	0.452614
P62280	RPS11	0.556223	0.443777
Q8N1A0	KRT222	0.575565	0.424435
P35613	BSG	0.57826	0.42174
Q96IJ6	GMPPA	0.60961	0.39039
Q9Y3B9	RRP15	0.62	0.38
Q8NC51	SERBP1	0.636416	0.363584
Q15555	MAPRE2	0.69879	0.30121
Q9H974	QTRT2	0.709674	0.290326
P50395	GDI2	0.73227	0.26773
O43598	DNPH1	0.740672	0.259328
Q01105	SET	0.744831	0.255169
P0DME0	SETSIP	0.744831	0.255169
O43396	TXNL1	0.760355	0.239645
Q9UN86	G3BP2	0.766473	0.233527
Q15417	CNN3	0.8191	0.1809
Q52LJ0	FAM98B	0.821456	0.178544
P51858	HDGF	0.84393	0.15607
P11908	PRPS2	0.84745	0.15255
P49005	POLD2	0.859967	0.140033
P35250	RFC2	0.862976	0.137024
P04181	OAT	0.863307	0.136693
P35237	SERPINB6	0.865658	0.134342
P43490	NAMPT	0.867134	0.132866
Q9UNM6	PSMD13	0.874154	0.125846
P56545	CTBP2	0.883244	0.116756
P05787	KRT8	1	0
P19013	KRT4	1	0
Q04695	KRT17	1	0
Q86Y46	KRT73	1	0
Q7RTS7	KRT74	1	0
Q3SY84	KRT71	1	0
Q9BYR2	KRTAP4-5	1	0
Q9BQ66	KRTAP4-12	1	0
Q9BYQ5	KRTAP4-6	1	0
Q9BYR0	KRTAP4-7	1	0
A6NDG6	PGP	1	0
A6NDU8	RIMOC1	1	0
A6NIH7	UNC119B	1	0
A8MXV4	NUDT19	1	0
O00151	PDLIM1	1	0
O00154	ACOT7	1	0
O00165	HAX1	1	0
O00170	AIP	1	0
O00204	SULT2B1	1	0
O00231	PSMD11	1	0
O00232	PSMD12	1	0
O00233	PSMD9	1	0
O00264	PGRMC1	1	0
O00273	DFFA	1	0
O00299	CLIC1	1	0
O00303	EIF3F	1	0
O00442	RTCA	1	0
O00487	PSMD14	1	0
O00560	SDCBP	1	0
O00629	KPNA4	1	0
O00743	PPP6C	1	0
O00764	PDXK	1	0
P47813	EIF1AX	1	0
O14602	EIF1AY	1	0
O14656	TOR1A	1	0
O14737	PDCD5	1	0
O14745	SLC9A3R1	1	0
O14818	PSMA7	1	0
Q8TAA3	PSMA8	1	0
O14879	IFIT3	1	0
O14907	TAX1BP3	1	0
O14908	GIPC1	1	0
O14949	UQCRQ	1	0
P19105	MYL12A	1	0
O14950	MYL12B	1	0
P24844	MYL9	1	0
O15145	ARPC3	1	0
O15160	POLR1C	1	0
O15173	PGRMC2	1	0
O15269	SPTLC1	1	0
O15305	PMM2	1	0
O15347	HMGB3	1	0
O15372	EIF3H	1	0
O15460	P4HA2	1	0
O15498	YKT6	1	0
O43148	RNMT	1	0
O43159	RRP8	1	0
O43172	PRPF4	1	0
O43242	PSMD3	1	0
O43251	RBFOX2	1	0
Q9NWB1	RBFOX1	1	0
O43324	EEF1E1	1	0
O43399	TPD52L2	1	0
O43402	EMC8	1	0
Q8NHP1	AKR7L	1	0
O43583	DENR	1	0
O43617	TRAPPC3	1	0
O43660	PLRG1	1	0
O43670	ZNF207	1	0
O43676	NDUFB3	1	0
O43681	GET3	1	0
O43684	BUB3	1	0
O43765	SGTA	1	0
O43809	NUDT21	1	0
O43818	RRP9	1	0
O43920	NDUFS5	1	0
O60256	PRPSAP2	1	0
O60573	EIF4E2	1	0
O60664	PLIN3	1	0
O60678	PRMT3	1	0
O60701	UGDH	1	0
O60814	H2BC12	1	0
P57053	H2BC12L	1	0
O60830	TIMM17B	1	0
O60832	DKC1	1	0
O60869	EDF1	1	0
O60884	DNAJA2	1	0
O75131	CPNE3	1	0
Q96FN4	CPNE2	1	0
O75223	GGCT	1	0
O75347	TBCA	1	0
O75351	VPS4B	1	0
O75367	MACROH2A1	1	0
O75368	SH3BGRL	1	0
O75396	SEC22B	1	0
O75436	VPS26A	1	0
O75477	ERLIN1	1	0
O75521	ECI2	1	0
O75569	PRKRA	1	0
O75607	NPM3	1	0
O75608	LYPLA1	1	0
O75663	TIPRL	1	0
O75695	RP2	1	0
O75718	CRTAP	1	0
O75792	RNASEH2A	1	0
O75794	CDC123	1	0
O75821	EIF3G	1	0
O75828	CBR3	1	0
O75832	PSMD10	1	0
O75934	BCAS2	1	0
O75935	DCTN3	1	0
O75937	DNAJC8	1	0
O75947	ATP5PD	1	0
O75955	FLOT1	1	0
O76003	GLRX3	1	0
O76027	ANXA9	1	0
O76070	SNCG	1	0
O76071	CIAO1	1	0
O76075	DFFB	1	0
O94760	DDAH1	1	0
O94766	B3GAT3	1	0
O94788	ALDH1A2	1	0
O94905	ERLIN2	1	0
O95159	ZFPL1	1	0
O95168	NDUFB4	1	0
O95218	ZRANB2	1	0
O95232	LUC7L3	1	0
O95249	GOSR1	1	0
O95292	VAPB	1	0
O95295	SNAPIN	1	0
O95336	PGLS	1	0
O95372	LYPLA2	1	0
O95376	ARIH2	1	0
O95433	AHSA1	1	0
O95456	PSMG1	1	0
O95619	YEATS4	1	0
O95630	STAMBP	1	0
O95716	RAB3D	1	0
O95721	SNAP29	1	0
O95747	OXSR1	1	0
O95749	GGPS1	1	0
O95777	LSM8	1	0
O95801	TTC4	1	0
O95816	BAG2	1	0
O95825	CRYZL1	1	0
O95861	BPNT1	1	0
O95881	TXNDC12	1	0
O95926	SYF2	1	0
O95983	MBD3	1	0
O96000	NDUFB10	1	0
O96019	ACTL6A	1	0
O94805	ACTL6B	1	0
P00387	CYB5R3	1	0
P00491	PNP	1	0
P00492	HPRT1	1	0
P00558	PGK1	1	0
P07205	PGK2	1	0
P00568	AK1	1	0
P00918	CA2	1	0
P01111	NRAS	1	0
P01112	HRAS	1	0
P01857	IGHG1	1	0
P01861	IGHG4	1	0
P01860	IGHG3	1	0
P01889	HLA-B	1	0
Q31610	HLA-B	1	0
P30486	HLA-B	1	0
P04222	HLA-C	1	0
P13747	HLA-E	1	0
P17693	HLA-G	1	0
P01892	HLA-A	1	0
P30459	HLA-A	1	0
P10314	HLA-A	1	0
P16189	HLA-A	1	0
P30512	HLA-A	1	0
Q09160	HLA-A	1	0
P02649	APOE	1	0
P04066	FUCA1	1	0
P04075	ALDOA	1	0
P04080	CSTB	1	0
P04083	ANXA1	1	0
P04183	TK1	1	0
P04350	TUBB4A	1	0
P04406	GAPDH	1	0
P04632	CAPNS1	1	0
P04792	HSPB1	1	0
P04899	GNAI2	1	0
P05026	ATP1B1	1	0
P05089	ARG1	1	0
P05198	EIF2S1	1	0
P05388	RPLP0	1	0
Q8NHW5	RPLP0P6	1	0
P05455	SSB	1	0
P05783	KRT18	1	0
P06132	UROD	1	0
P06730	EIF4E	1	0
P06733	ENO1	1	0
P06746	POLB	1	0
P06748	NPM1	1	0
P06753	TPM3	1	0
P07237	P4HB	1	0
P07355	ANXA2	1	0
A6NMY6	ANXA2P2	1	0
P07437	TUBB	1	0
A6NNZ2	TUBB8B	1	0
P07737	PFN1	1	0
P07741	APRT	1	0
Q14568	HSP90AA2P	1	0
Q58FG0	HSP90AA5P	1	0
Q58FG1	HSP90AA4P	1	0
P07910	HNRNPC	1	0
O60812	HNRNPCL1	1	0
B2RXH8	HNRNPCL2	1	0
P0DMR1	HNRNPCL4	1	0
B7ZW38	HNRNPCL3	1	0
P08397	HMBS	1	0
P08559	PDHA1	1	0
P29803	PDHA2	1	0
P08579	SNRPB2	1	0
P08670	VIM	1	0
P17661	DES	1	0
P41219	PRPH	1	0
P14136	GFAP	1	0
P08708	RPS17	1	0
P08754	GNAI3	1	0
P09471	GNAO1	1	0
P11488	GNAT1	1	0
P19087	GNAT2	1	0
A8MTJ3	GNAT3	1	0
P08865	RPSA	1	0
P09012	SNRPA	1	0
P09104	ENO2	1	0
P09132	SRP19	1	0
P09211	GSTP1	1	0
P09417	QDPR	1	0
P09429	HMGB1	1	0
B2RPK0	HMGB1P1	1	0
P09525	ANXA4	1	0
P09622	DLD	1	0
Q32P51	HNRNPA1L2	1	0
P09661	SNRPA1	1	0
P09913	IFIT2	1	0
P09914	IFIT1	1	0
P09936	UCHL1	1	0
P09972	ALDOC	1	0
Q71UI9	H2AZ2	1	0
P0C0S5	H2AZ1	1	0
Q01081	U2AF1	1	0
P0DN76	#N/A	1	0
Q8WU68	U2AF1L4	1	0
P35520	CBS	1	0
P0DN79	#N/A	1	0
P10316	HLA-A	1	0
P01891	HLA-A	1	0
P30457	HLA-A	1	0
P30453	HLA-A	1	0
P30450	HLA-A	1	0
P18462	HLA-A	1	0
P16190	HLA-A	1	0
P30456	HLA-A	1	0
P10321	HLA-C	1	0
P10412	H1-4	1	0
P22492	H1-6	1	0
Q02539	H1-1	1	0
P10599	TXN	1	0
P10644	PRKAR1A	1	0
P10768	ESD	1	0
P10809	HSPD1	1	0
P11172	UMPS	1	0
P11182	DBT	1	0
P11233	RALA	1	0
P11234	RALB	1	0
P11441	UBL4A	1	0
P11766	ADH5	1	0
P11802	CDK4	1	0
P12004	PCNA	1	0
P12268	IMPDH2	1	0
P12277	CKB	1	0
P06732	CKM	1	0
P12955	PEPD	1	0
P13674	P4HA1	1	0
P13693	TPT1	1	0
P13861	PRKAR2A	1	0
Q5VT79	ANXA8L1	1	0
P13928	ANXA8	1	0
P13984	GTF2F2	1	0
P13995	MTHFD2	1	0
P14174	MIF	1	0
P14550	AKR1A1	1	0
P14618	PKM	1	0
Q58FF3	HSP90B2P	1	0
P14635	CCNB1	1	0
P63162	SNRPN	1	0
P14678	SNRPB	1	0
P14927	UQCRB	1	0
P15104	GLUL	1	0
P15121	AKR1B1	1	0
C9JRZ8	AKR1B15	1	0
P15170	GSPT1	1	0
P15531	NME1	1	0
P15880	RPS2	1	0
P15927	RPA2	1	0
P16152	CBR1	1	0
P48741	HSPA7	1	0
P17612	PRKACA	1	0
P17980	PSMC3	1	0
P17987	TCP1	1	0
P18077	RPL35A	1	0
P18085	ARF4	1	0
P18124	RPL7	1	0
P18621	RPL17	1	0
P18754	RCC1	1	0
P19387	POLR2C	1	0
P19623	SRM	1	0
P19784	CSNK2A2	1	0
P20338	RAB4A	1	0
P20340	RAB6A	1	0
Q9NRW1	RAB6B	1	0
Q14964	RAB39A	1	0
P46439	GSTM5	1	0
P21796	VDAC1	1	0
P22061	PCMT1	1	0
P22087	FBL	1	0
P22392	NME2	1	0
O60361	NME2P1	1	0
P22626	HNRNPA2B1	1	0
P22694	PRKACB	1	0
P23193	TCEA1	1	0
Q15560	TCEA2	1	0
P23381	WARS1	1	0
P23396	RPS3	1	0
Q16778	H2BC21	1	0
P33778	H2BC3	1	0
P23527	H2BC17	1	0
Q8N257	H2BU1	1	0
P23528	CFL1	1	0
P23610	F8A1	1	0
P23919	DTYMK	1	0
P24534	EEF1B2	1	0
P24666	ACP1	1	0
P25325	MPST	1	0
P25398	RPS12	1	0
P25685	DNAJB1	1	0
P25786	PSMA1	1	0
P25787	PSMA2	1	0
P25788	PSMA3	1	0
P25789	PSMA4	1	0
P26368	U2AF2	1	0
P26583	HMGB2	1	0
P26885	FKBP2	1	0
P27144	AK4	1	0
P27348	YWHAQ	1	0
P27361	MAPK3	1	0
P27635	RPL10	1	0
Q96L21	RPL10L	1	0
P27695	APEX1	1	0
P28066	PSMA5	1	0
P28072	PSMB6	1	0
P28161	GSTM2	1	0
P28482	MAPK1	1	0
P29083	GTF2E1	1	0
P29218	IMPA1	1	0
P29372	MPG	1	0
P29373	CRABP2	1	0
P29762	CRABP1	1	0
P29508	SERPINB3	1	0
P29692	EEF1D	1	0
P30041	PRDX6	1	0
P30043	BLVRB	1	0
P30046	DDT	1	0
P30050	RPL12	1	0
P30085	CMPK1	1	0
P30086	PEBP1	1	0
P30101	PDIA3	1	0
P30419	NMT1	1	0
O60551	NMT2	1	0
P30519	HMOX2	1	0
P30533	LRPAP1	1	0
P30740	SERPINB1	1	0
O75830	SERPINI2	1	0
P31150	GDI1	1	0
P31350	RRM2	1	0
P31483	TIA1	1	0
P31689	DNAJA1	1	0
P31942	HNRNPH3	1	0
P31943	HNRNPH1	1	0
P31946	YWHAB	1	0
P32119	PRDX2	1	0
P32322	PYCR1	1	0
P32969	RPL9	1	0
P33240	CSTF2	1	0
P35219	CA8	1	0
P35232	PHB1	1	0
P35249	RFC4	1	0
P35268	RPL22	1	0
P35270	SPR	1	0
P35659	DEK	1	0
P35998	PSMC2	1	0
P36404	ARL2	1	0
P36405	ARL3	1	0
P36507	MAP2K2	1	0
P36542	ATP5F1C	1	0
P36543	ATP6V1E1	1	0
Q96A05	ATP6V1E2	1	0
P36578	RPL4	1	0
P36871	PGM1	1	0
P36873	PPP1CC	1	0
P36952	SERPINB5	1	0
P36957	DLST	1	0
P37108	SRP14	1	0
P37198	NUP62	1	0
P37802	TAGLN2	1	0
Q9UI15	TAGLN3	1	0
P37837	TALDO1	1	0
P38117	ETFB	1	0
P38159	RBMX	1	0
Q96E39	RBMXL1	1	0
O75526	RBMXL2	1	0
P38919	EIF4A3	1	0
P39019	RPS19	1	0
P39023	RPL3	1	0
Q92901	RPL3L	1	0
P39687	ANP32A	1	0
O43423	ANP32C	1	0
P39748	FEN1	1	0
P40121	CAPG	1	0
P40227	CCT6A	1	0
P40429	RPL13A	1	0
P40925	MDH1	1	0
P40926	MDH2	1	0
P40937	RFC5	1	0
P40938	RFC3	1	0
P41091	EIF2S3	1	0
Q2VIR3	EIF2S3B	1	0
P41223	BUD31	1	0
P41227	NAA10	1	0
Q9BSU3	NAA11	1	0
P41240	CSK	1	0
P41567	EIF1	1	0
P42167	TMPO	1	0
P42677	RPS27	1	0
P42765	ACAA2	1	0
P42771	CDKN2A	1	0
P42772	CDKN2B	1	0
P43034	PAFAH1B1	1	0
P43307	SSR1	1	0
P43487	RANBP1	1	0
P43686	PSMC4	1	0
P45880	VDAC2	1	0
P46109	CRKL	1	0
P46776	RPL27A	1	0
P46777	RPL5	1	0
P46778	RPL21	1	0
P46779	RPL28	1	0
P46781	RPS9	1	0
P46782	RPS5	1	0
P46926	GNPDA1	1	0
Q8TDQ7	GNPDA2	1	0
P47755	CAPZA2	1	0
P47756	CAPZB	1	0
P48047	ATP5PO	1	0
P48444	ARCN1	1	0
P48507	GCLM	1	0
P48594	SERPINB4	1	0
P48643	CCT5	1	0
P48723	HSPA13	1	0
P48739	PITPNB	1	0
P49207	RPL34	1	0
P49368	CCT3	1	0
P49407	ARRB1	1	0
P49458	SRP9	1	0
P49585	PCYT1A	1	0
Q9Y5K3	PCYT1B	1	0
P49593	PPM1F	1	0
P49642	PRIM1	1	0
P49720	PSMB3	1	0
P49721	PSMB2	1	0
P49770	EIF2B2	1	0
P49773	HINT1	1	0
P49821	NDUFV1	1	0
P49840	GSK3A	1	0
P49903	SEPHS1	1	0
P50213	IDH3A	1	0
P50336	PPOX	1	0
P50402	EMD	1	0
P50453	SERPINB9	1	0
P50454	SERPINH1	1	0
P50502	ST13	1	0
P50552	VASP	1	0
P50897	PPT1	1	0
P50914	RPL14	1	0
P50991	CCT4	1	0
P50995	ANXA11	1	0
P51148	RAB5C	1	0
P51149	RAB7A	1	0
P51151	RAB9A	1	0
Q9NP90	RAB9B	1	0
P51153	RAB13	1	0
P51452	DUSP3	1	0
P51570	GALK1	1	0
P51572	BCAP31	1	0
P51648	ALDH3A2	1	0
P48448	ALDH3B2	1	0
P30838	ALDH3A1	1	0
P43353	ALDH3B1	1	0
P51665	PSMD7	1	0
P51809	VAMP7	1	0
P51970	NDUFA8	1	0
P51991	HNRNPA3	1	0
P52292	KPNA2	1	0
P52294	KPNA1	1	0
P52434	POLR2H	1	0
P52565	ARHGDIA	1	0
P52597	HNRNPF	1	0
P52815	MRPL12	1	0
P52907	CAPZA1	1	0
P53004	BLVRA	1	0
P53041	PPP5C	1	0
P53365	ARFIP2	1	0
P53367	ARFIP1	1	0
P53582	METAP1	1	0
P53701	HCCS	1	0
P53990	IST1	1	0
P53999	SUB1	1	0
P54577	YARS1	1	0
P54578	USP14	1	0
P54619	PRKAG1	1	0
P54727	RAD23B	1	0
P54819	AK2	1	0
P54920	NAPA	1	0
Q9H115	NAPB	1	0
P55010	EIF5	1	0
P55036	PSMD4	1	0
P55039	DRG2	1	0
P55210	CASP7	1	0
P55263	ADK	1	0
P55327	TPD52	1	0
P55735	SEC13	1	0
P55769	SNU13	1	0
P55795	HNRNPH2	1	0
P55809	OXCT1	1	0
P55957	BID	1	0
P56134	ATP5MF	1	0
P56182	RRP1	1	0
P56537	EIF6	1	0
P56556	NDUFA6	1	0
P57105	SYNJ2BP	1	0
Q99879	H2BC14	1	0
Q99877	H2BC15	1	0
Q93079	H2BC9	1	0
Q5QNW6	H2BC18	1	0
P62807	H2BC10	1	0
P58876	H2BC5	1	0
Q99880	H2BC13	1	0
P59998	ARPC4	1	0
P60468	SEC61B	1	0
P60709	ACTB	1	0
Q9BYX7	POTEKP	1	0
P60842	EIF4A1	1	0
P60866	RPS20	1	0
P60891	PRPS1	1	0
P60900	PSMA6	1	0
P60953	CDC42	1	0
P17081	RHOQ	1	0
P60981	DSTN	1	0
P60983	GMFB	1	0
O60234	GMFG	1	0
P61009	SPCS3	1	0
P61019	RAB2A	1	0
P61020	RAB5B	1	0
P61026	RAB10	1	0
P61081	UBE2M	1	0
P61086	UBE2K	1	0
P61106	RAB14	1	0
P61158	ACTR3	1	0
Q9P1U1	ACTR3B	1	0
P61163	ACTR1A	1	0
P62834	RAP1A	1	0
P61224	RAP1B	1	0
A6NIZ1	#N/A	1	0
P61225	RAP2B	1	0
Q9Y3L5	RAP2C	1	0
P10114	RAP2A	1	0
P61247	RPS3A	1	0
P61254	RPL26	1	0
P61289	PSME3	1	0
P61313	RPL15	1	0
P61353	RPL27	1	0
P61513	RPL37A	1	0
A6NKH3	RPL37AP8	1	0
P61586	RHOA	1	0
P61604	HSPE1	1	0
P61758	VBP1	1	0
P61769	B2M	1	0
P61916	NPC2	1	0
P61923	COPZ1	1	0
P61956	SUMO2	1	0
Q6EEV6	SUMO4	1	0
P55854	SUMO3	1	0
P61962	DCAF7	1	0
P61964	WDR5	1	0
P61981	YWHAG	1	0
P62081	RPS7	1	0
P62136	PPP1CA	1	0
P62140	PPP1CB	1	0
P62191	PSMC1	1	0
P62195	PSMC5	1	0
P62241	RPS8	1	0
P62244	RPS15A	1	0
P62258	YWHAE	1	0
P62269	RPS18	1	0
P62277	RPS13	1	0
P62306	SNRPF	1	0
P62314	SNRPD1	1	0
P62316	SNRPD2	1	0
P62318	SNRPD3	1	0
P62495	ETF1	1	0
P62699	YPEL5	1	0
P62701	RPS4X	1	0
Q8TD47	RPS4Y2	1	0
P22090	RPS4Y1	1	0
P62753	RPS6	1	0
P62805	H4-16	1	0
P62820	RAB1A	1	0
P62826	RAN	1	0
P62829	RPL23	1	0
P62847	RPS24	1	0
P62851	RPS25	1	0
P62854	RPS26	1	0
Q5JNZ5	RPS26P11	1	0
P62857	RPS28	1	0
P62888	RPL30	1	0
P62899	RPL31	1	0
P62906	RPL10A	1	0
P62910	RPL32	1	0
P62913	RPL11	1	0
P62917	RPL8	1	0
P62937	PPIA	1	0
Q9Y536	PPIAL4A	1	0
P0DN26	PPIAL4F	1	0
F5H284	PPIAL4D	1	0
A0A0B4J2A2	PPIAL4C	1	0
A0A075B759	PPIAL4E	1	0
P0DN37	PPIAL4G	1	0
P62942	FKBP1A	1	0
P62993	GRB2	1	0
P62995	TRA2B	1	0
P63000	RAC1	1	0
P60763	RAC3	1	0
P15153	RAC2	1	0
P63092	GNAS	1	0
P63104	YWHAZ	1	0
P63151	PPP2R2A	1	0
Q66LE6	PPP2R2D	1	0
Q00005	PPP2R2B	1	0
Q9Y2T4	PPP2R2C	1	0
P63167	DYNLL1	1	0
Q96FJ2	DYNLL2	1	0
P63172	DYNLT1	1	0
P63173	RPL38	1	0
P63241	EIF5A	1	0
Q6IS14	EIF5AL1	1	0
Q9GZV4	EIF5A2	1	0
P63261	ACTG1	1	0
P63279	UBE2I	1	0
P67775	PPP2CA	1	0
P62714	PPP2CB	1	0
P67870	CSNK2B	1	0
P68133	ACTA1	1	0
P68032	ACTC1	1	0
P63267	ACTG2	1	0
P62736	ACTA2	1	0
P68036	UBE2L3	1	0
P68104	EEF1A1	1	0
Q5VTE0	EEF1A1P5	1	0
P68363	TUBA1B	1	0
A6NHL2	TUBAL3	1	0
P68366	TUBA4A	1	0
P68371	TUBB4B	1	0
P68400	CSNK2A1	1	0
Q8NEV1	CSNK2A3	1	0
P68402	PAFAH1B2	1	0
P68431	H3C1	1	0
Q16695	H3-4	1	0
Q6NXT2	H3-5	1	0
P78330	PSPH	1	0
P78406	RAE1	1	0
P78417	GSTO1	1	0
P78540	ARG2	1	0
P80303	NUCB2	1	0
P82673	MRPS35	1	0
P82930	MRPS34	1	0
P82979	SARNP	1	0
P83731	RPL24	1	0
P83881	RPL36A	1	0
Q969Q0	RPL36AL	1	0
P84077	ARF1	1	0
P61204	ARF3	1	0
P84085	ARF5	1	0
P84090	ERH	1	0
P84098	RPL19	1	0
P84103	SRSF3	1	0
P84243	H3-3A	1	0
P98179	RBM3	1	0
P99999	CYCS	1	0
Q00013	MPP1	1	0
Q00169	PITPNA	1	0
Q00534	CDK6	1	0
Q00535	CDK5	1	0
Q00577	PURA	1	0
Q00688	FKBP3	1	0
Q00796	SORD	1	0
Q01085	TIAL1	1	0
Q01130	SRSF2	1	0
Q9BRL6	SRSF8	1	0
Q01469	FABP5	1	0
A8MUU1	FABP5P3	1	0
Q01518	CAP1	1	0
P40123	CAP2	1	0
Q01581	HMGCS1	1	0
Q02127	DHODH	1	0
Q02543	RPL18A	1	0
Q02750	MAP2K1	1	0
Q02790	FKBP4	1	0
Q02878	RPL6	1	0
Q04917	YWHAH	1	0
Q05048	CSTF1	1	0
Q05639	EEF1A2	1	0
Q06203	PPAT	1	0
Q06323	PSME1	1	0
Q06830	PRDX1	1	0
Q07020	RPL18	1	0
Q07021	C1QBP	1	0
Q8IUG1	KRTAP1-3	1	0
Q07627	KRTAP1-1	1	0
Q9BYS1	KRTAP1-5	1	0
Q07955	SRSF1	1	0
Q08257	CRYZ	1	0
Q08752	PPID	1	0
Q09028	RBBP4	1	0
Q0VDF9	HSPA14	1	0
Q12765	SCRN1	1	0
Q12792	TWF1	1	0
Q12800	TFCP2	1	0
Q9NZI7	UBP1	1	0
Q12846	STX4	1	0
Q12849	GRSF1	1	0
Q12904	AIMP1	1	0
Q12905	ILF2	1	0
Q12972	PPP1R8	1	0
Q13084	MRPL28	1	0
Q13098	GPS1	1	0
Q13112	CHAF1B	1	0
Q13126	MTAP	1	0
Q13148	TARDBP	1	0
Q13151	HNRNPA0	1	0
Q13153	PAK1	1	0
Q13155	AIMP2	1	0
Q13177	PAK2	1	0
Q13228	SELENBP1	1	0
Q13242	SRSF9	1	0
Q13247	SRSF6	1	0
Q13283	G3BP1	1	0
Q13347	EIF3I	1	0
Q13363	CTBP1	1	0
Q13451	FKBP5	1	0
Q13509	TUBB3	1	0
Q13526	PIN1	1	0
O15428	PIN1P1	1	0
Q13547	HDAC1	1	0
Q13561	DCTN2	1	0
Q13564	NAE1	1	0
Q13630	GFUS	1	0
Q13685	AAMP	1	0
Q13838	DDX39B	1	0
Q13868	EXOSC2	1	0
Q13895	BYSL	1	0
Q14019	COTL1	1	0
Q14103	HNRNPD	1	0
Q14141	SEPTIN6	1	0
Q14165	MLEC	1	0
Q14232	EIF2B1	1	0
Q14240	EIF4A2	1	0
Q14247	CTTN	1	0
Q14254	FLOT2	1	0
Q14318	FKBP8	1	0
Q14320	FAM50A	1	0
Q9Y247	FAM50B	1	0
Q14558	PRPSAP1	1	0
Q14696	MESD	1	0
Q14919	DRAP1	1	0
Q15006	EMC2	1	0
Q15008	PSMD6	1	0
Q15018	ABRAXAS2	1	0
Q15019	SEPTIN2	1	0
Q15024	EXOSC7	1	0
Q15056	EIF4H	1	0
Q15084	PDIA6	1	0
Q15102	PAFAH1B3	1	0
Q15165	PON2	1	0
Q15181	PPA1	1	0
Q15185	PTGES3	1	0
Q15233	NONO	1	0
Q15257	PTPA	1	0
Q15274	QPRT	1	0
Q15291	RBBP5	1	0
Q15365	PCBP1	1	0
P57723	PCBP4	1	0
Q15370	ELOB	1	0
Q15435	PPP1R7	1	0
Q15631	TSN	1	0
Q15645	TRIP13	1	0
Q15654	TRIP6	1	0
Q15691	MAPRE1	1	0
Q15717	ELAVL1	1	0
Q15750	TAB1	1	0
Q15785	TOMM34	1	0
Q15819	UBE2V2	1	0
Q15843	NEDD8	1	0
Q15907	RAB11B	1	0
P62491	RAB11A	1	0
P57735	RAB25	1	0
Q16181	SEPTIN7	1	0
Q6ZU15	SEPTIN14	1	0
Q16204	CCDC6	1	0
Q16222	UAP1	1	0
Q16352	INA	1	0
Q16540	MRPL23	1	0
Q16543	CDC37	1	0
Q16576	RBBP7	1	0
Q16629	SRSF7	1	0
Q16630	CPSF6	1	0
Q16637	SMN1	1	0
Q16644	MAPKAPK3	1	0
Q16718	NDUFA5	1	0
Q16762	TST	1	0
Q16763	UBE2S	1	0
Q16777	H2AC20	1	0
Q6FI13	H2AC18	1	0
Q99878	H2AC14	1	0
Q96KK5	H2AC12	1	0
Q9BTM1	H2AJ	1	0
P0C0S8	H2AC11	1	0
P20671	H2AC7	1	0
Q16836	HADH	1	0
Q3SXM5	HSDL1	1	0
Q3ZCM7	TUBB8	1	0
Q3ZCQ8	TIMM50	1	0
Q53EL6	PDCD4	1	0
Q53H12	AGK	1	0
Q53H96	PYCR3	1	0
Q53HC9	EIPR1	1	0
Q5RKV6	EXOSC6	1	0
Q5T440	IBA57	1	0
Q5TDH0	DDI2	1	0
Q5VT66	MTARC1	1	0
Q5VW32	BROX	1	0
Q5VWZ2	LYPLAL1	1	0
Q69YN2	CWF19L1	1	0
Q6DKJ4	NXN	1	0
Q6FI81	CIAPIN1	1	0
Q6IAA8	LAMTOR1	1	0
Q6IBS0	TWF2	1	0
Q6NYC1	JMJD6	1	0
Q6P1J9	CDC73	1	0
Q6P4I2	WDR73	1	0
Q6P9B6	MEAK7	1	0
Q6S8J7	POTEA	1	0
Q6UXN9	WDR82	1	0
Q6YN16	HSDL2	1	0
Q6ZN17	LIN28B	1	0
Q6ZNW5	GDPGP1	1	0
Q71DI3	H3C13	1	0
Q71U36	TUBA1A	1	0
Q6PEY2	TUBA3E	1	0
Q7L1Q6	BZW1	1	0
Q7L2H7	EIF3M	1	0
Q7L5N1	COPS6	1	0
Q9H8S9	MOB1A	1	0
Q7L9L4	MOB1B	1	0
Q7Z3B4	NUP54	1	0
Q7Z4H3	HDDC2	1	0
Q7Z4H8	POGLUT3	1	0
Q7Z4W1	DCXR	1	0
Q7Z7H5	TMED4	1	0
Q86TX2	ACOT1	1	0
Q86V81	ALYREF	1	0
Q86W42	THOC6	1	0
Q86Y82	STX12	1	0
Q86YB8	ERO1B	1	0
Q8IUF8	RIOX2	1	0
Q8IUI8	CRLF3	1	0
Q8IV38	ANKMY2	1	0
Q8IVS2	MCAT	1	0
Q8IWS0	PHF6	1	0
Q8IZP0	ABI1	1	0
Q8N183	NDUFAF2	1	0
Q8N4V1	MMGT1	1	0
Q8N5K1	CISD2	1	0
Q8N5M4	TTC9C	1	0
Q8N684	CPSF7	1	0
Q8NBN7	RDH13	1	0
Q8NBQ5	HSD17B11	1	0
Q8NBS9	TXNDC5	1	0
Q8NBT2	SPC24	1	0
Q8NBU5	ATAD1	1	0
Q8NCA5	FAM98A	1	0
Q8NEJ9	NGDN	1	0
Q8NFH3	NUP43	1	0
Q8NFH4	NUP37	1	0
Q8NFH5	NUP35	1	0
Q8NFI4	ST13P5	1	0
Q8NFW8	CMAS	1	0
Q8TBX8	PIP4K2C	1	0
Q8TDN6	BRIX1	1	0
Q8TDP1	RNASEH2C	1	0
Q8TEA8	DTD1	1	0
Q8TED0	UTP15	1	0
Q8WUA2	PPIL4	1	0
Q8WVM0	TFB1M	1	0
Q8WVY7	UBLCP1	1	0
Q92530	PSMF1	1	0
Q92575	UBXN4	1	0
Q92665	MRPS31	1	0
Q92688	ANP32B	1	0
Q92734	TFG	1	0
Q92769	HDAC2	1	0
Q92820	GGH	1	0
Q92879	CELF1	1	0
Q92882	OSTF1	1	0
Q92890	UFD1	1	0
Q92917	GPKOW	1	0
Q92979	EMG1	1	0
Q93077	H2AC6	1	0
Q7L7L0	H2AW	1	0
P04908	H2AC4	1	0
Q969G3	SMARCE1	1	0
Q969U7	PSMG2	1	0
Q96A33	CCDC47	1	0
Q96AB3	ISOC2	1	0
Q96AG4	LRRC59	1	0
Q96AZ6	ISG20	1	0
Q96B26	EXOSC8	1	0
Q96BW5	PTER	1	0
Q96C23	GALM	1	0
Q96C36	PYCR2	1	0
Q96C86	DCPS	1	0
Q96CN7	ISOC1	1	0
Q96CS3	FAF2	1	0
Q96CT7	CCDC124	1	0
Q96CW1	AP2M1	1	0
Q96CX2	KCTD12	1	0
Q96D46	NMD3	1	0
Q96DI7	SNRNP40	1	0
Q96DV4	MRPL38	1	0
Q96EE3	SEH1L	1	0
Q96EK6	GNPNAT1	1	0
Q96EL3	MRPL53	1	0
Q96EP5	DAZAP1	1	0
Q96F86	EDC3	1	0
Q96FW1	OTUB1	1	0
Q96GD0	PDXP	1	0
Q96GD4	AURKB	1	0
Q9UQB9	AURKC	1	0
Q96HE7	ERO1A	1	0
Q96HY6	DDRGK1	1	0
Q96I15	SCLY	1	0
Q96I25	RBM17	1	0
Q96IU4	ABHD14B	1	0
Q96J01	THOC3	1	0
Q96JJ7	TMX3	1	0
Q96KB5	PBK	1	0
Q96KP4	CNDP2	1	0
Q96M27	PRRC1	1	0
Q96MG7	NSMCE3	1	0
Q96MX6	DNAAF10	1	0
Q96P16	RPRD1A	1	0
Q96PU8	QKI	1	0
Q96QV6	H2AC1	1	0
Q96S44	TP53RK	1	0
Q96T60	PNKP	1	0
Q99426	TBCB	1	0
Q99436	PSMB7	1	0
Q99442	SEC62	1	0
Q99471	PFDN5	1	0
Q99496	RNF2	1	0
Q99497	PARK7	1	0
Q99536	VAT1	1	0
Q99541	PLIN2	1	0
Q99598	TSNAX	1	0
Q99611	SEPHS2	1	0
Q99614	TTC1	1	0
Q99615	DNAJC7	1	0
Q99623	PHB2	1	0
Q99627	COPS8	1	0
Q99729	HNRNPAB	1	0
Q99747	NAPG	1	0
Q99829	CPNE1	1	0
Q99873	PRMT1	1	0
Q99961	SH3GL1	1	0
Q99962	SH3GL2	1	0
Q99986	VRK1	1	0
Q9BPU6	DPYSL5	1	0
Q9BQ67	GRWD1	1	0
Q9BQA1	WDR77	1	0
Q9BQC3	DPH2	1	0
Q9BQE3	TUBA1C	1	0
Q9BQE5	APOL2	1	0
Q9BR76	CORO1B	1	0
Q9BRA2	TXNDC17	1	0
Q9BRG1	VPS25	1	0
Q9BRP4	PAAF1	1	0
Q9BRT2	UQCC2	1	0
Q9BRT9	GINS4	1	0
Q9BRX5	GINS3	1	0
Q9BRX8	PRXL2A	1	0
Q9BS26	ERP44	1	0
Q9BSD7	NTPCR	1	0
Q9BSH5	HDHD3	1	0
Q9BT73	PSMG3	1	0
Q9BTT0	ANP32E	1	0
Q9BTV5	FSD1	1	0
Q9BTZ2	DHRS4	1	0
P0CG22	DHRS4L1	1	0
Q9BUF5	TUBB6	1	0
Q9BUI4	POLR3C	1	0
Q9BUL8	PDCD10	1	0
Q9BUT1	BDH2	1	0
Q9BV20	MRI1	1	0
Q9BV44	THUMPD3	1	0
Q9BV86	NTMT1	1	0
Q9BVA1	TUBB2B	1	0
Q9BVI4	NOC4L	1	0
Q9BVK6	TMED9	1	0
Q9BVM2	DPCD	1	0
Q9BW83	IFT27	1	0
Q9BW91	NUDT9	1	0
Q9BWD1	ACAT2	1	0
Q9BWF3	RBM4	1	0
Q9BXS5	AP1M1	1	0
Q9Y6Q5	AP1M2	1	0
Q9BY32	ITPA	1	0
Q9BY77	POLDIP3	1	0
Q9BYD1	MRPL13	1	0
Q9BYD3	MRPL4	1	0
Q9BZI7	UPF3B	1	0
Q9BZX2	UCK2	1	0
Q9BZZ5	API5	1	0
Q9C0B1	FTO	1	0
Q9C0E8	LNPK	1	0
Q9GZL7	WDR12	1	0
Q9GZS3	WDR61	1	0
Q9GZT3	SLIRP	1	0
Q9GZZ1	NAA50	1	0
Q9GZZ9	UBA5	1	0
Q9H074	PAIP1	1	0
Q9H0C8	ILKAP	1	0
Q9H0E2	TOLLIP	1	0
Q9H0P0	NT5C3A	1	0
Q9H0S4	DDX47	1	0
Q9H0U4	RAB1B	1	0
Q92928	RAB1C	1	0
Q9H0W9	C11orf54	1	0
Q9H223	EHD4	1	0
Q9H3K6	BOLA2	1	0
Q9H3N1	TMX1	1	0
Q9H3R5	CENPH	1	0
Q9H444	CHMP4B	1	0
Q9H773	DCTPP1	1	0
Q9H7B2	RPF2	1	0
Q9H8Y8	GORASP2	1	0
Q9H993	ARMT1	1	0
Q9H9Q2	COPS7B	1	0
Q9HA64	FN3KRP	1	0
Q9HAB8	PPCS	1	0
Q9HAV7	GRPEL1	1	0
Q9HB71	CACYBP	1	0
Q9HBH5	RDH14	1	0
Q9HC38	GLOD4	1	0
Q9HCN4	GPN1	1	0
Q9HCU5	PREB	1	0
Q9HDC9	APMAP	1	0
Q9NNW7	TXNRD2	1	0
Q9NP66	HMG20A	1	0
Q9NP72	RAB18	1	0
Q9NP77	SSU72	1	0
Q9NP79	VTA1	1	0
Q9NP92	MRPS30	1	0
Q9NPD3	EXOSC4	1	0
Q9NPH2	ISYNA1	1	0
Q9NPQ8	RIC8A	1	0
Q9NVN3	RIC8B	1	0
Q9NQ48	LZTFL1	1	0
Q9NQR4	NIT2	1	0
Q9NQT4	EXOSC5	1	0
Q9NQT5	EXOSC3	1	0
Q9NR31	SAR1A	1	0
Q9NR45	NANS	1	0
Q9NR50	EIF2B3	1	0
Q9NRG9	AAAS	1	0
Q9NRN7	AASDHPPT	1	0
Q9NRV9	HEBP1	1	0
Q9NRX2	MRPL17	1	0
Q9NT62	ATG3	1	0
Q9NTK5	OLA1	1	0
Q9NUP9	LIN7C	1	0
O14910	LIN7A	1	0
Q9HAP6	LIN7B	1	0
Q9NUU7	DDX19A	1	0
Q9UHL0	DDX25	1	0
Q9NVA2	SEPTIN11	1	0
Q9NVJ2	ARL8B	1	0
Q9NVM6	DNAJC17	1	0
Q9NVT9	ARMC1	1	0
Q9NW64	RBM22	1	0
Q9NWT6	HIF1AN	1	0
Q9NWY4	HPF1	1	0
A8MVJ9	#N/A	1	0
Q9NX40	OCIAD1	1	0
Q9NX46	ADPRS	1	0
Q9NX58	LYAR	1	0
Q9NX63	CHCHD3	1	0
Q9NXG2	THUMPD1	1	0
Q9NY12	GAR1	1	0
Q9NYB0	TERF2IP	1	0
Q9NYK5	MRPL39	1	0
Q9NYL9	TMOD3	1	0
Q9NZL4	HSPBP1	1	0
Q9NZL9	MAT2B	1	0
Q9P015	MRPL15	1	0
Q9P032	NDUFAF4	1	0
Q9P0L0	VAPA	1	0
Q9P1F3	ABRACL	1	0
Q9P258	RCC2	1	0
Q9P289	STK26	1	0
O00506	STK25	1	0
Q9P2W9	STX18	1	0
Q9P2X0	DPM3	1	0
Q9UBE0	SAE1	1	0
Q9UBI1	COMMD3	1	0
Q9UBP6	METTL1	1	0
Q9UBQ0	VPS29	1	0
Q9UBQ5	EIF3K	1	0
Q9UBQ7	GRHPR	1	0
Q9UBS4	DNAJB11	1	0
Q9UBV8	PEF1	1	0
Q9UBW8	COPS7A	1	0
Q9UDY4	DNAJB4	1	0
Q9UET6	FTSJ1	1	0
Q9UH62	ARMCX3	1	0
Q9UHD1	CHORDC1	1	0
Q9UHV9	PFDN2	1	0
Q9UHY7	ENOPH1	1	0
Q9UI30	TRMT112	1	0
Q9UIJ7	AK3	1	0
Q9UJA5	TRMT6	1	0
Q9UJU6	DBNL	1	0
Q9UJW0	DCTN4	1	0
Q9UJZ1	STOML2	1	0
Q9UKD2	MRTO4	1	0
Q9UKK9	NUDT5	1	0
Q9UKL0	RCOR1	1	0
Q9P2K3	RCOR3	1	0
Q9UKM9	RALY	1	0
Q9UKX7	NUP50	1	0
Q9UL25	RAB21	1	0
Q9UL46	PSME2	1	0
Q9ULV4	CORO1C	1	0
Q9UMR2	DDX19B	1	0
Q9UMS4	PRPF19	1	0
Q9UN37	VPS4A	1	0
Q9UNE7	STUB1	1	0
Q9UNH7	SNX6	1	0
Q9UNZ2	NSFL1C	1	0
Q9UQ80	PA2G4	1	0
Q9Y224	RTRAF	1	0
Q9Y230	RUVBL2	1	0
Q9Y237	PIN4	1	0
Q9Y241	HIGD1A	1	0
Q9Y265	RUVBL1	1	0
Q9Y266	NUDC	1	0
Q9Y277	VDAC3	1	0
Q9Y281	CFL2	1	0
Q9Y285	FARSA	1	0
Q9Y291	MRPS33	1	0
Q9Y295	DRG1	1	0
Q9Y2B0	CNPY2	1	0
Q9Y2G5	POFUT2	1	0
Q9Y2P8	RCL1	1	0
Q9Y2Q3	GSTK1	1	0
Q9Y2R5	MRPS17	1	0
Q9Y2R9	MRPS7	1	0
Q9Y2T2	AP3M1	1	0
P53677	AP3M2	1	0
Q9Y2Z0	SUGT1	1	0
Q9Y305	ACOT9	1	0
Q9Y314	NOSIP	1	0
Q9Y333	LSM2	1	0
Q9Y371	SH3GLB1	1	0
Q9Y383	LUC7L2	1	0
Q9Y394	DHRS7	1	0
Q9Y3A5	SBDS	1	0
Q9Y3B2	EXOSC1	1	0
Q9Y3B3	TMED7	1	0
Q9Y3B4	SF3B6	1	0
Q9Y3B7	MRPL11	1	0
Q9Y3C4	TPRKB	1	0
Q9Y3C8	UFC1	1	0
Q9Y3D3	MRPS16	1	0
Q9Y3D6	FIS1	1	0
Q9Y3D7	PAM16	1	0
Q9Y3D9	MRPS23	1	0
Q9Y3E5	PTRH2	1	0
Q9Y3F4	STRAP	1	0
Q9Y3I0	RTCB	1	0
Q9Y3Y2	CHTOP	1	0
Q9Y508	RNF114	1	0
Q9Y512	SAMM50	1	0
Q9Y570	PPME1	1	0
Q9Y5K5	UCHL5	1	0
Q9Y5K8	ATP6V1D	1	0
Q9Y5M8	SRPRB	1	0
Q9Y5P6	GMPPB	1	0
Q9Y5Q8	GTF3C5	1	0
Q9Y5S9	RBM8A	1	0
Q9Y5U8	MPC1	1	0
Q9Y5X3	SNX5	1	0
Q9Y617	PSAT1	1	0
Q9Y676	MRPS18B	1	0
Q9Y696	CLIC4	1	0
O15247	CLIC2	1	0
Q9Y6A4	CFAP20	1	0
Q9Y6B6	SAR1B	1	0
Q9Y6C9	MTCH2	1	0
Q9Y6E0	STK24	1	0
Q9Y6E2	BZW2	1	0
Q9Y6G9	DYNC1LI1	1	0
	#N/A
	#N/A
	#N/A
	#N/A
	#N/A
	#N/A
	#N/A
	#N/A
	#N/A
	#N/A
	#N/A
	#N/A
	#N/A
	#N/A
	#N/A
	#N/A
	#N/A
	#N/A
	#N/A
	#N/A
	#N/A
	#N/A
	#N/A
	#N/A
	#N/A
	#N/A
	#N/A
	#N/A
	#N/A
	#N/A
	#N/A
	#N/A
	#N/A
	#N/A
	#N/A
	#N/A
	#N/A
	#N/A
	#N/A
	#N/A
	#N/A
	#N/A
	#N/A
	#N/A
	#N/A
	#N/A
	#N/A
	#N/A
	#N/A
	#N/A
	#N/A
	#N/A
	#N/A
	#N/A
	#N/A
	#N/A
	#N/A
	#N/A
	#N/A
	#N/A
	#N/A
	#N/A
	#N/A
	#N/A
	#N/A
	#N/A
	#N/A
	#N/A
	#N/A
	#N/A
	#N/A
	#N/A
	#N/A
	#N/A
	#N/A
	#N/A
	#N/A
	#N/A
	#N/A
	#N/A
	#N/A
	#N/A
	#N/A
	#N/A
	#N/A
	#N/A
	#N/A
	#N/A
	#N/A
	#N/A
	#N/A
	#N/A
	#N/A
	#N/A
	#N/A
	#N/A
	#N/A
	#N/A
	#N/A
	#N/A
	#N/A
	#N/A
	#N/A
	#N/A
	#N/A
	#N/A
	#N/A
	#N/A
	#N/A
	#N/A
	#N/A
	#N/A
	#N/A
	#N/A
	#N/A
	#N/A
	#N/A
	#N/A
	#N/A
	#N/A
	#N/A
	#N/A
	#N/A
	#N/A
	#N/A
	#N/A
	#N/A
	#N/A
	#N/A
	#N/A
	#N/A
	#N/A
	#N/A
	#N/A
	#N/A
	#N/A
	#N/A
	#N/A
	#N/A
	#N/A
	#N/A
	#N/A
	#N/A
	#N/A
	#N/A
	#N/A
	#N/A
	#N/A
	#N/A
	#N/A
	#N/A
	#N/A
	#N/A
	#N/A
	#N/A
	#N/A
	#N/A
	#N/A
	#N/A
	#N/A
	#N/A
	#N/A
	#N/A
	#N/A
	#N/A
	#N/A
	#N/A
	#N/A
	#N/A
	#N/A
	#N/A
	#N/A
	#N/A
	#N/A
	#N/A
	#N/A
	#N/A
	#N/A
	#N/A
	#N/A
	#N/A
	#N/A
	#N/A
	#N/A
	#N/A
	#N/A
	#N/A
	#N/A
	#N/A
	#N/A
	#N/A
	#N/A
	#N/A
	#N/A
	#N/A
	#N/A
	#N/A
	#N/A
	#N/A
	#N/A
	#N/A
	#N/A
	#N/A
	#N/A
	#N/A
	#N/A
	#N/A
	#N/A
	#N/A
	#N/A
	#N/A
	#N/A
	#N/A
	#N/A
	#N/A
	#N/A
	#N/A
	#N/A
	#N/A
	#N/A
	#N/A
	#N/A
	#N/A
	#N/A
	#N/A
	#N/A
	#N/A
	#N/A
	#N/A
	#N/A
	#N/A
	#N/A
	#N/A
	#N/A
	#N/A
	#N/A
	#N/A
	#N/A
	#N/A
	#N/A
	#N/A
	#N/A
	#N/A
	#N/A
	#N/A
	#N/A
	#N/A
	#N/A
	#N/A
	#N/A
	#N/A
	#N/A
	#N/A
	#N/A
	#N/A
	#N/A
	#N/A
	#N/A
	#N/A
	#N/A
	#N/A
	#N/A
	#N/A
	#N/A
	#N/A
	#N/A
	#N/A
	#N/A
	#N/A
	#N/A
	#N/A
	#N/A
	#N/A
	#N/A
	#N/A
	#N/A
	#N/A
	#N/A
	#N/A
	#N/A
	#N/A
	#N/A
	#N/A
	#N/A
	#N/A
	#N/A
	#N/A
	#N/A
	#N/A
	#N/A
	#N/A
	#N/A
	#N/A
	#N/A
	#N/A
	#N/A
	#N/A
	#N/A
	#N/A
	#N/A
	#N/A
	#N/A
	#N/A
	#N/A
	#N/A
	#N/A
	#N/A
	#N/A
	#N/A
	#N/A
	#N/A
	#N/A
	#N/A
	#N/A
	#N/A
	#N/A
	#N/A
	#N/A
	#N/A
	#N/A
	#N/A
	#N/A
	#N/A
	#N/A
	#N/A
	#N/A
	#N/A
	#N/A
	#N/A
	#N/A
	#N/A
	#N/A
	#N/A
	#N/A
	#N/A
	#N/A
	#N/A
	#N/A
	#N/A
	#N/A
	#N/A
	#N/A
	#N/A
	#N/A
	#N/A
	#N/A
	#N/A
	#N/A
	#N/A
	#N/A
	#N/A
	#N/A
	#N/A
	#N/A
	#N/A
	#N/A
	#N/A
	#N/A
	#N/A
	#N/A
	#N/A
	#N/A
	#N/A
	#N/A
	#N/A
	#N/A
	#N/A
	#N/A
	#N/A
	#N/A
	#N/A
	#N/A
	#N/A
	#N/A
	#N/A
	#N/A
	#N/A
	#N/A
	#N/A
	#N/A
	#N/A
	#N/A
	#N/A
	#N/A
	#N/A
	#N/A
	#N/A
	#N/A
	#N/A
	#N/A
	#N/A
	#N/A
	#N/A
	#N/A
	#N/A
	#N/A
	#N/A
	#N/A
	#N/A
	#N/A
	#N/A
	#N/A
	#N/A
	#N/A
	#N/A
	#N/A
	#N/A
	#N/A
	#N/A
	#N/A
	#N/A
	#N/A
	#N/A
	#N/A
	#N/A
	#N/A
	#N/A
	#N/A
	#N/A
	#N/A
	#N/A
	#N/A
	#N/A
	#N/A
	#N/A
	#N/A
	#N/A
	#N/A
	#N/A
	#N/A
	#N/A
	#N/A
	#N/A
	#N/A
	#N/A
	#N/A
	#N/A
	#N/A
	#N/A
	#N/A
	#N/A
	#N/A
	#N/A
	#N/A
	#N/A
	#N/A
	#N/A
	#N/A
	#N/A
	#N/A
	#N/A
	#N/A
	#N/A
	#N/A
	#N/A
	#N/A
	#N/A
	#N/A
	#N/A
	#N/A
	#N/A
	#N/A
	#N/A
	#N/A
	#N/A
	#N/A
	#N/A
	#N/A
	#N/A
	#N/A
	#N/A
	#N/A
	#N/A
	#N/A
	#N/A
	#N/A
	#N/A
	#N/A
	#N/A
	#N/A
	#N/A
	#N/A
	#N/A
	#N/A
	#N/A
	#N/A
	#N/A
	#N/A
	#N/A
	#N/A
	#N/A
	#N/A
	#N/A
	#N/A
	#N/A
	#N/A
	#N/A
	#N/A
	#N/A
	#N/A
	#N/A
	#N/A
	#N/A
	#N/A
	#N/A
	#N/A
	#N/A
	#N/A
	#N/A
	#N/A
	#N/A
	#N/A
	#N/A
	#N/A
	#N/A
	#N/A
	#N/A
	#N/A
	#N/A
	#N/A
	#N/A
	#N/A
	#N/A
	#N/A
	#N/A
	#N/A
	#N/A
	#N/A
	#N/A
	#N/A
	#N/A
	#N/A
	#N/A
	#N/A
	#N/A
	#N/A
	#N/A
	#N/A
	#N/A
	#N/A
	#N/A
	#N/A
	#N/A
	#N/A
	#N/A
	#N/A
	#N/A
	#N/A
	#N/A
	#N/A
	#N/A
	#N/A
	#N/A
	#N/A
	#N/A
	#N/A
	#N/A
	#N/A
	#N/A
	#N/A
	#N/A
	#N/A
	#N/A
	#N/A
	#N/A
	#N/A
	#N/A
	#N/A
	#N/A
	#N/A
	#N/A
	#N/A
	#N/A
	#N/A
	#N/A
	#N/A
	#N/A
	#N/A
	#N/A
	#N/A
	#N/A
	#N/A
	#N/A
	#N/A
	#N/A
	#N/A
	#N/A
	#N/A
	#N/A
	#N/A
	#N/A
	#N/A
	#N/A
	#N/A
	#N/A
	#N/A
	#N/A
	#N/A
	#N/A
	#N/A
	#N/A
	#N/A
	#N/A
	#N/A
	#N/A
	#N/A
	#N/A
	#N/A
	#N/A
	#N/A
	#N/A
	#N/A
	#N/A
	#N/A
	#N/A
	#N/A
	#N/A
	#N/A
	#N/A
	#N/A
	#N/A
	#N/A
	#N/A
	#N/A
	#N/A
	#N/A
	#N/A
	#N/A
	#N/A
	#N/A
	#N/A
	#N/A
	#N/A
	#N/A
	#N/A
	#N/A
	#N/A
	#N/A
	#N/A
	#N/A
	#N/A
	#N/A
	#N/A
	#N/A
	#N/A
	#N/A
	#N/A
	#N/A
	#N/A
	#N/A
	#N/A
	#N/A
	#N/A
	#N/A
	#N/A
	#N/A
	#N/A
	#N/A
	#N/A
	#N/A
	#N/A
	#N/A
	#N/A
	#N/A
	#N/A
	#N/A
	#N/A
	#N/A
	#N/A
	#N/A
	#N/A
	#N/A
	#N/A
	#N/A
	#N/A
	#N/A
	#N/A
	#N/A
	#N/A
	#N/A
	#N/A
	#N/A
	#N/A
	#N/A
	#N/A
	#N/A
	#N/A
	#N/A
	#N/A
	#N/A
	#N/A
	#N/A
	#N/A
	#N/A
	#N/A
	#N/A
	#N/A
	#N/A
	#N/A
	#N/A
	#N/A
	#N/A
	#N/A
	#N/A
	#N/A
	#N/A
	#N/A
	#N/A
	#N/A
	#N/A
[truncated: 226 more rows]
